# Supplementary material for: Intrinsically disordered proteins (IDPs) in trypanosomatids
Source: PubMed Central journal article supplement (PMC4378006; doi:10.1186/1471-2164-15-1100), 2014-12-13
Supplement: 12864_2014_6918_MOESM4_ESM.pdf [file 12864_2014_6918_MOESM4_ESM.pdf]

| <b>Organism</b>        | <b>Sequences larger than 100 amino acids</b> | <b>Sequences with initial Methionine</b> | <b>Sequences with initial Methionine and don't have annotation errors</b> |
|------------------------|----------------------------------------------|------------------------------------------|---------------------------------------------------------------------------|
| <i>L. braziliensis</i> | 98.2% (8165 proteins)                        | 97.2% (8084 proteins)                    | 95.8% (7965 proteins)                                                     |
| <i>L. major</i>        | 98.1% (8253 proteins)                        | 97.7% (8222 proteins)                    | 97.1% (8171 proteins)                                                     |
| <i>L. infantum</i>     | 98.2% (8072 proteins)                        | 97.7% (8034 proteins)                    | 95.3% (7835 proteins)                                                     |
| <i>L. mexicana</i>     | 100% (7952 proteins)                         | 100% (7952 proteins)                     | 100% (7952 proteins)                                                      |
| <i>L. tarentolae</i>   | 100% (7465 proteins)                         | 100% (7465 proteins)                     | 100% (7465 proteins)                                                      |
| <i>T. cruzi</i>        | 97.8% (10096 proteins)                       | 86.4% (8921 proteins)                    | 79.2% (8178 proteins)                                                     |
| <i>T. brucei</i>       | 97.0% (9599 proteins)                        | 96.3% (9537 proteins)                    | 95.7% (9472 proteins)                                                     |
