# Supplementary material for: Intrinsically disordered proteins (IDPs) in trypanosomatids
Source: PubMed Central journal article supplement (PMC4378006; doi:10.1186/1471-2164-15-1100), 2014-12-13
Supplement: 12864_2014_6918_MOESM5_ESM.pdf [file 12864_2014_6918_MOESM5_ESM.pdf]

| Protein ID     | Organism               | Length | Start coord | End coord |
|----------------|------------------------|--------|-------------|-----------|
| LbrM01_V2.0010 | <i>L. braziliensis</i> | 197    | 1           | 197       |
| LbrM01_V2.0010 | <i>L. braziliensis</i> | 64     | 315         | 378       |
| LbrM01_V2.0010 | <i>L. braziliensis</i> | 408    | 412         | 819       |
| LbrM01_V2.0010 | <i>L. braziliensis</i> | 65     | 849         | 913       |
| LbrM01_V2.0020 | <i>L. braziliensis</i> | 146    | 288         | 433       |
| LbrM01_V2.0020 | <i>L. braziliensis</i> | 156    | 462         | 617       |
| LbrM01_V2.0030 | <i>L. braziliensis</i> | 61     | 97          | 157       |
| LbrM01_V2.0030 | <i>L. braziliensis</i> | 68     | 312         | 379       |
| LbrM01_V2.0030 | <i>L. braziliensis</i> | 68     | 312         | 379       |
| LbrM01_V2.0040 | <i>L. braziliensis</i> | 57     | 276         | 332       |
| LbrM01_V2.0050 | <i>L. braziliensis</i> | 44     | 45          | 88        |
| LbrM01_V2.0060 | <i>L. braziliensis</i> | 58     | 70          | 127       |
| LbrM01_V2.0060 | <i>L. braziliensis</i> | 124    | 446         | 569       |
| LbrM01_V2.0070 | <i>L. braziliensis</i> | 54     | 1           | 54        |
| LbrM01_V2.0090 | <i>L. braziliensis</i> | 114    | 125         | 238       |
| LbrM01_V2.0100 | <i>L. braziliensis</i> | 75     | 70          | 144       |
| LbrM01_V2.0100 | <i>L. braziliensis</i> | 62     | 240         | 301       |
| LbrM01_V2.0100 | <i>L. braziliensis</i> | 94     | 521         | 614       |
| LbrM01_V2.0140 | <i>L. braziliensis</i> | 58     | 23          | 80        |
| LbrM01_V2.0150 | <i>L. braziliensis</i> | 42     | 1           | 42        |
| LbrM01_V2.0150 | <i>L. braziliensis</i> | 106    | 79          | 184       |
| LbrM01_V2.0150 | <i>L. braziliensis</i> | 45     | 204         | 248       |
| LbrM01_V2.0150 | <i>L. braziliensis</i> | 291    | 283         | 573       |
| LbrM01_V2.0160 | <i>L. braziliensis</i> | 186    | 179         | 364       |
| LbrM01_V2.0180 | <i>L. braziliensis</i> | 44     | 63          | 106       |
| LbrM01_V2.0200 | <i>L. braziliensis</i> | 73     | 1           | 73        |
| LbrM01_V2.0200 | <i>L. braziliensis</i> | 78     | 130         | 207       |
| LbrM01_V2.0200 | <i>L. braziliensis</i> | 158    | 296         | 453       |
| LbrM01_V2.0210 | <i>L. braziliensis</i> | 51     | 718         | 768       |
| LbrM01_V2.0220 | <i>L. braziliensis</i> | 66     | 23          | 88        |
| LbrM01_V2.0220 | <i>L. braziliensis</i> | 81     | 112         | 192       |
| LbrM01_V2.0230 | <i>L. braziliensis</i> | 42     | 87          | 128       |
| LbrM01_V2.0240 | <i>L. braziliensis</i> | 63     | 42          | 104       |
| LbrM01_V2.0240 | <i>L. braziliensis</i> | 142    | 190         | 331       |
| LbrM01_V2.0240 | <i>L. braziliensis</i> | 85     | 388         | 472       |
| LbrM01_V2.0240 | <i>L. braziliensis</i> | 54     | 653         | 706       |
| LbrM01_V2.0250 | <i>L. braziliensis</i> | 54     | 50          | 103       |
| LbrM01_V2.0260 | <i>L. braziliensis</i> | 71     | 58          | 128       |
| LbrM01_V2.0260 | <i>L. braziliensis</i> | 84     | 163         | 246       |
| LbrM01_V2.0260 | <i>L. braziliensis</i> | 128    | 329         | 456       |
| LbrM01_V2.0280 | <i>L. braziliensis</i> | 46     | 273         | 318       |
| LbrM01_V2.0280 | <i>L. braziliensis</i> | 70     | 512         | 581       |
| LbrM01_V2.0280 | <i>L. braziliensis</i> | 136    | 596         | 731       |

|                |                        |     |      |      |
|----------------|------------------------|-----|------|------|
| LbrM01_V2.0290 | <i>L. braziliensis</i> | 186 | 42   | 227  |
| LbrM01_V2.0290 | <i>L. braziliensis</i> | 287 | 263  | 549  |
| LbrM01_V2.0310 | <i>L. braziliensis</i> | 54  | 1    | 54   |
| LbrM01_V2.0390 | <i>L. braziliensis</i> | 110 | 1    | 110  |
| LbrM01_V2.0400 | <i>L. braziliensis</i> | 220 | 369  | 588  |
| LbrM01_V2.0400 | <i>L. braziliensis</i> | 134 | 606  | 739  |
| LbrM01_V2.0420 | <i>L. braziliensis</i> | 42  | 147  | 188  |
| LbrM01_V2.0430 | <i>L. braziliensis</i> | 45  | 556  | 600  |
| LbrM01_V2.0430 | <i>L. braziliensis</i> | 92  | 683  | 774  |
| LbrM01_V2.0440 | <i>L. braziliensis</i> | 109 | 1    | 109  |
| LbrM01_V2.0440 | <i>L. braziliensis</i> | 87  | 220  | 306  |
| LbrM01_V2.0440 | <i>L. braziliensis</i> | 119 | 485  | 603  |
| LbrM01_V2.0440 | <i>L. braziliensis</i> | 54  | 761  | 814  |
| LbrM01_V2.0450 | <i>L. braziliensis</i> | 53  | 100  | 152  |
| LbrM01_V2.0450 | <i>L. braziliensis</i> | 147 | 233  | 379  |
| LbrM01_V2.0450 | <i>L. braziliensis</i> | 43  | 500  | 542  |
| LbrM01_V2.0460 | <i>L. braziliensis</i> | 85  | 1    | 85   |
| LbrM01_V2.0470 | <i>L. braziliensis</i> | 43  | 1    | 43   |
| LbrM01_V2.0480 | <i>L. braziliensis</i> | 137 | 130  | 266  |
| LbrM01_V2.0480 | <i>L. braziliensis</i> | 56  | 390  | 445  |
| LbrM01_V2.0480 | <i>L. braziliensis</i> | 67  | 485  | 551  |
| LbrM01_V2.0480 | <i>L. braziliensis</i> | 56  | 580  | 635  |
| LbrM01_V2.0490 | <i>L. braziliensis</i> | 49  | 279  | 327  |
| LbrM01_V2.0510 | <i>L. braziliensis</i> | 299 | 1    | 299  |
| LbrM01_V2.0510 | <i>L. braziliensis</i> | 46  | 734  | 779  |
| LbrM01_V2.0510 | <i>L. braziliensis</i> | 210 | 877  | 1086 |
| LbrM01_V2.0510 | <i>L. braziliensis</i> | 252 | 1111 | 1362 |
| LbrM01_V2.0550 | <i>L. braziliensis</i> | 52  | 1    | 52   |
| LbrM01_V2.0560 | <i>L. braziliensis</i> | 206 | 1    | 206  |
| LbrM01_V2.0560 | <i>L. braziliensis</i> | 44  | 250  | 293  |
| LbrM01_V2.0570 | <i>L. braziliensis</i> | 130 | 1    | 130  |
| LbrM01_V2.0570 | <i>L. braziliensis</i> | 61  | 206  | 266  |
| LbrM01_V2.0570 | <i>L. braziliensis</i> | 289 | 381  | 669  |
| LbrM01_V2.0580 | <i>L. braziliensis</i> | 42  | 1    | 42   |
| LbrM01_V2.0580 | <i>L. braziliensis</i> | 52  | 65   | 116  |
| LbrM01_V2.0580 | <i>L. braziliensis</i> | 76  | 189  | 264  |
| LbrM01_V2.0580 | <i>L. braziliensis</i> | 234 | 294  | 527  |
| LbrM01_V2.0590 | <i>L. braziliensis</i> | 109 | 1    | 109  |
| LbrM01_V2.0590 | <i>L. braziliensis</i> | 83  | 211  | 293  |
| LbrM01_V2.0610 | <i>L. braziliensis</i> | 74  | 1    | 74   |
| LbrM01_V2.0610 | <i>L. braziliensis</i> | 104 | 242  | 345  |
| LbrM01_V2.0630 | <i>L. braziliensis</i> | 40  | 1    | 40   |
| LbrM01_V2.0630 | <i>L. braziliensis</i> | 133 | 90   | 222  |
| LbrM01_V2.0630 | <i>L. braziliensis</i> | 42  | 506  | 547  |
| LbrM01_V2.0630 | <i>L. braziliensis</i> | 44  | 570  | 613  |
| LbrM01_V2.0630 | <i>L. braziliensis</i> | 47  | 644  | 690  |
| LbrM01_V2.0630 | <i>L. braziliensis</i> | 97  | 739  | 835  |

|                |                        |     |      |      |
|----------------|------------------------|-----|------|------|
| LbrM01_V2.0630 | <i>L. braziliensis</i> | 49  | 1464 | 1512 |
| LbrM01_V2.0630 | <i>L. braziliensis</i> | 67  | 1631 | 1697 |
| LbrM01_V2.0650 | <i>L. braziliensis</i> | 41  | 23   | 63   |
| LbrM01_V2.0650 | <i>L. braziliensis</i> | 182 | 99   | 280  |
| LbrM01_V2.0660 | <i>L. braziliensis</i> | 499 | 1    | 499  |
| LbrM01_V2.0660 | <i>L. braziliensis</i> | 40  | 550  | 589  |
| LbrM01_V2.0660 | <i>L. braziliensis</i> | 189 | 621  | 809  |
| LbrM01_V2.0680 | <i>L. braziliensis</i> | 55  | 207  | 261  |
| LbrM01_V2.0680 | <i>L. braziliensis</i> | 154 | 277  | 430  |
| LbrM01_V2.0680 | <i>L. braziliensis</i> | 154 | 277  | 430  |
| LbrM01_V2.0690 | <i>L. braziliensis</i> | 45  | 272  | 316  |
| LbrM01_V2.0700 | <i>L. braziliensis</i> | 236 | 1    | 236  |
| LbrM01_V2.0700 | <i>L. braziliensis</i> | 76  | 362  | 437  |
| LbrM01_V2.0700 | <i>L. braziliensis</i> | 46  | 754  | 799  |
| LbrM01_V2.0700 | <i>L. braziliensis</i> | 49  | 838  | 886  |
| LbrM01_V2.0700 | <i>L. braziliensis</i> | 59  | 1428 | 1486 |
| LbrM01_V2.0700 | <i>L. braziliensis</i> | 57  | 1533 | 1589 |
| LbrM01_V2.0710 | <i>L. braziliensis</i> | 149 | 119  | 267  |
| LbrM01_V2.0710 | <i>L. braziliensis</i> | 175 | 378  | 552  |
| LbrM01_V2.0730 | <i>L. braziliensis</i> | 236 | 181  | 416  |
| LbrM01_V2.0750 | <i>L. braziliensis</i> | 167 | 1    | 167  |
| LbrM01_V2.0750 | <i>L. braziliensis</i> | 171 | 170  | 340  |
| LbrM01_V2.0750 | <i>L. braziliensis</i> | 58  | 359  | 416  |
| LbrM01_V2.0750 | <i>L. braziliensis</i> | 40  | 457  | 496  |
| LbrM01_V2.0760 | <i>L. braziliensis</i> | 224 | 1    | 224  |
| LbrM01_V2.0770 | <i>L. braziliensis</i> | 121 | 565  | 685  |
| LbrM01_V2.0780 | <i>L. braziliensis</i> | 133 | 679  | 811  |
| LbrM01_V2.0790 | <i>L. braziliensis</i> | 49  | 1    | 49   |
| LbrM01_V2.0790 | <i>L. braziliensis</i> | 49  | 132  | 180  |
| LbrM01_V2.0790 | <i>L. braziliensis</i> | 40  | 248  | 287  |
| LbrM01_V2.0790 | <i>L. braziliensis</i> | 76  | 304  | 379  |
| LbrM01_V2.0790 | <i>L. braziliensis</i> | 148 | 865  | 1012 |
| LbrM02_V2.0020 | <i>L. braziliensis</i> | 42  | 1    | 42   |
| LbrM02_V2.0050 | <i>L. braziliensis</i> | 42  | 1    | 42   |
| LbrM02_V2.0080 | <i>L. braziliensis</i> | 43  | 88   | 130  |
| LbrM02_V2.0090 | <i>L. braziliensis</i> | 47  | 351  | 397  |
| LbrM02_V2.0100 | <i>L. braziliensis</i> | 42  | 160  | 201  |
| LbrM02_V2.0100 | <i>L. braziliensis</i> | 65  | 754  | 818  |
| LbrM02_V2.0110 | <i>L. braziliensis</i> | 365 | 1    | 365  |
| LbrM02_V2.0110 | <i>L. braziliensis</i> | 158 | 377  | 534  |
| LbrM02_V2.0110 | <i>L. braziliensis</i> | 40  | 882  | 921  |
| LbrM02_V2.0120 | <i>L. braziliensis</i> | 72  | 759  | 830  |
| LbrM02_V2.0130 | <i>L. braziliensis</i> | 40  | 112  | 151  |
| LbrM02_V2.0130 | <i>L. braziliensis</i> | 92  | 156  | 247  |
| LbrM02_V2.0130 | <i>L. braziliensis</i> | 49  | 515  | 563  |
| LbrM02_V2.0130 | <i>L. braziliensis</i> | 158 | 638  | 795  |
| LbrM02_V2.0130 | <i>L. braziliensis</i> | 51  | 1127 | 1177 |

|                |                        |     |      |      |
|----------------|------------------------|-----|------|------|
| LbrM02_V2.0130 | <i>L. braziliensis</i> | 57  | 1291 | 1347 |
| LbrM02_V2.0130 | <i>L. braziliensis</i> | 60  | 1449 | 1508 |
| LbrM02_V2.0130 | <i>L. braziliensis</i> | 50  | 2109 | 2158 |
| LbrM02_V2.0130 | <i>L. braziliensis</i> | 60  | 2405 | 2464 |
| LbrM02_V2.0130 | <i>L. braziliensis</i> | 55  | 2645 | 2699 |
| LbrM02_V2.0130 | <i>L. braziliensis</i> | 65  | 2742 | 2806 |
| LbrM02_V2.0130 | <i>L. braziliensis</i> | 64  | 3420 | 3483 |
| LbrM02_V2.0130 | <i>L. braziliensis</i> | 105 | 3534 | 3638 |
| LbrM02_V2.0130 | <i>L. braziliensis</i> | 66  | 4148 | 4213 |
| LbrM02_V2.0130 | <i>L. braziliensis</i> | 52  | 4834 | 4885 |
| LbrM02_V2.0140 | <i>L. braziliensis</i> | 63  | 54   | 116  |
| LbrM02_V2.0150 | <i>L. braziliensis</i> | 171 | 140  | 310  |
| LbrM02_V2.0150 | <i>L. braziliensis</i> | 41  | 580  | 620  |
| LbrM02_V2.0150 | <i>L. braziliensis</i> | 70  | 766  | 835  |
| LbrM02_V2.0180 | <i>L. braziliensis</i> | 122 | 75   | 196  |
| LbrM02_V2.0180 | <i>L. braziliensis</i> | 76  | 250  | 325  |
| LbrM02_V2.0180 | <i>L. braziliensis</i> | 110 | 588  | 697  |
| LbrM02_V2.0180 | <i>L. braziliensis</i> | 47  | 791  | 837  |
| LbrM02_V2.0180 | <i>L. braziliensis</i> | 41  | 869  | 909  |
| LbrM02_V2.0180 | <i>L. braziliensis</i> | 46  | 942  | 987  |
| LbrM02_V2.0180 | <i>L. braziliensis</i> | 96  | 1098 | 1193 |
| LbrM02_V2.0180 | <i>L. braziliensis</i> | 67  | 1208 | 1274 |
| LbrM02_V2.0180 | <i>L. braziliensis</i> | 41  | 1295 | 1335 |
| LbrM02_V2.0180 | <i>L. braziliensis</i> | 63  | 1522 | 1584 |
| LbrM02_V2.0180 | <i>L. braziliensis</i> | 54  | 1657 | 1710 |
| LbrM02_V2.0180 | <i>L. braziliensis</i> | 148 | 1744 | 1891 |
| LbrM02_V2.0180 | <i>L. braziliensis</i> | 49  | 1894 | 1942 |
| LbrM02_V2.0190 | <i>L. braziliensis</i> | 156 | 1    | 156  |
| LbrM02_V2.0190 | <i>L. braziliensis</i> | 56  | 298  | 353  |
| LbrM02_V2.0200 | <i>L. braziliensis</i> | 97  | 40   | 136  |
| LbrM02_V2.0200 | <i>L. braziliensis</i> | 43  | 143  | 185  |
| LbrM02_V2.0200 | <i>L. braziliensis</i> | 61  | 187  | 247  |
| LbrM02_V2.0210 | <i>L. braziliensis</i> | 60  | 30   | 89   |
| LbrM02_V2.0240 | <i>L. braziliensis</i> | 75  | 51   | 125  |
| LbrM02_V2.0240 | <i>L. braziliensis</i> | 66  | 196  | 261  |
| LbrM02_V2.0240 | <i>L. braziliensis</i> | 91  | 533  | 623  |
| LbrM02_V2.0240 | <i>L. braziliensis</i> | 65  | 739  | 803  |
| LbrM02_V2.0250 | <i>L. braziliensis</i> | 40  | 549  | 588  |
| LbrM02_V2.0260 | <i>L. braziliensis</i> | 86  | 24   | 109  |
| LbrM02_V2.0260 | <i>L. braziliensis</i> | 52  | 430  | 481  |
| LbrM02_V2.0260 | <i>L. braziliensis</i> | 42  | 599  | 640  |
| LbrM02_V2.0270 | <i>L. braziliensis</i> | 40  | 96   | 135  |
| LbrM02_V2.0270 | <i>L. braziliensis</i> | 59  | 187  | 245  |
| LbrM02_V2.0270 | <i>L. braziliensis</i> | 41  | 288  | 328  |
| LbrM02_V2.0270 | <i>L. braziliensis</i> | 41  | 521  | 561  |
| LbrM02_V2.0280 | <i>L. braziliensis</i> | 46  | 48   | 93   |
| LbrM02_V2.0280 | <i>L. braziliensis</i> | 41  | 280  | 320  |

|                |                        |     |      |      |
|----------------|------------------------|-----|------|------|
| LbrM02_V2.0280 | <i>L. braziliensis</i> | 45  | 528  | 572  |
| LbrM02_V2.0280 | <i>L. braziliensis</i> | 107 | 669  | 775  |
| LbrM02_V2.0280 | <i>L. braziliensis</i> | 40  | 796  | 835  |
| LbrM02_V2.0280 | <i>L. braziliensis</i> | 80  | 858  | 937  |
| LbrM02_V2.0280 | <i>L. braziliensis</i> | 42  | 1039 | 1080 |
| LbrM02_V2.0320 | <i>L. braziliensis</i> | 94  | 205  | 298  |
| LbrM02_V2.0320 | <i>L. braziliensis</i> | 68  | 393  | 460  |
| LbrM02_V2.0320 | <i>L. braziliensis</i> | 155 | 543  | 697  |
| LbrM02_V2.0320 | <i>L. braziliensis</i> | 61  | 963  | 1023 |
| LbrM02_V2.0330 | <i>L. braziliensis</i> | 96  | 72   | 167  |
| LbrM02_V2.0340 | <i>L. braziliensis</i> | 110 | 18   | 127  |
| LbrM02_V2.0340 | <i>L. braziliensis</i> | 41  | 455  | 495  |
| LbrM02_V2.0350 | <i>L. braziliensis</i> | 99  | 1    | 99   |
| LbrM02_V2.0350 | <i>L. braziliensis</i> | 54  | 450  | 503  |
| LbrM02_V2.0350 | <i>L. braziliensis</i> | 78  | 774  | 851  |
| LbrM02_V2.0350 | <i>L. braziliensis</i> | 190 | 1224 | 1413 |
| LbrM02_V2.0350 | <i>L. braziliensis</i> | 65  | 1851 | 1915 |
| LbrM02_V2.0360 | <i>L. braziliensis</i> | 78  | 1    | 78   |
| LbrM02_V2.0360 | <i>L. braziliensis</i> | 49  | 108  | 156  |
| LbrM02_V2.0360 | <i>L. braziliensis</i> | 100 | 168  | 267  |
| LbrM02_V2.0360 | <i>L. braziliensis</i> | 51  | 456  | 506  |
| LbrM02_V2.0370 | <i>L. braziliensis</i> | 51  | 1    | 51   |
| LbrM02_V2.0370 | <i>L. braziliensis</i> | 98  | 113  | 210  |
| LbrM02_V2.0370 | <i>L. braziliensis</i> | 125 | 304  | 428  |
| LbrM02_V2.0370 | <i>L. braziliensis</i> | 68  | 564  | 631  |
| LbrM02_V2.0370 | <i>L. braziliensis</i> | 80  | 679  | 758  |
| LbrM02_V2.0370 | <i>L. braziliensis</i> | 60  | 823  | 882  |
| LbrM02_V2.0380 | <i>L. braziliensis</i> | 77  | 1    | 77   |
| LbrM02_V2.0380 | <i>L. braziliensis</i> | 339 | 110  | 448  |
| LbrM02_V2.0380 | <i>L. braziliensis</i> | 50  | 477  | 526  |
| LbrM02_V2.0380 | <i>L. braziliensis</i> | 54  | 554  | 607  |
| LbrM02_V2.0380 | <i>L. braziliensis</i> | 65  | 829  | 893  |
| LbrM02_V2.0380 | <i>L. braziliensis</i> | 130 | 1026 | 1155 |
| LbrM02_V2.0400 | <i>L. braziliensis</i> | 57  | 476  | 532  |
| LbrM02_V2.0410 | <i>L. braziliensis</i> | 46  | 122  | 167  |
| LbrM02_V2.0410 | <i>L. braziliensis</i> | 99  | 260  | 358  |
| LbrM02_V2.0410 | <i>L. braziliensis</i> | 64  | 394  | 457  |
| LbrM02_V2.0420 | <i>L. braziliensis</i> | 59  | 43   | 101  |
| LbrM02_V2.0430 | <i>L. braziliensis</i> | 66  | 1    | 66   |
| LbrM02_V2.0430 | <i>L. braziliensis</i> | 120 | 104  | 223  |
| LbrM02_V2.0430 | <i>L. braziliensis</i> | 121 | 255  | 375  |
| LbrM02_V2.0430 | <i>L. braziliensis</i> | 156 | 434  | 589  |
| LbrM02_V2.0430 | <i>L. braziliensis</i> | 76  | 626  | 701  |
| LbrM02_V2.0430 | <i>L. braziliensis</i> | 51  | 815  | 865  |
| LbrM02_V2.0450 | <i>L. braziliensis</i> | 366 | 1    | 366  |
| LbrM02_V2.0450 | <i>L. braziliensis</i> | 368 | 393  | 760  |
| LbrM02_V2.0450 | <i>L. braziliensis</i> | 63  | 774  | 836  |

|                |                        |     |      |      |
|----------------|------------------------|-----|------|------|
| LbrM02_V2.0450 | <i>L. braziliensis</i> | 558 | 890  | 1447 |
| LbrM02_V2.0450 | <i>L. braziliensis</i> | 128 | 1464 | 1591 |
| LbrM02_V2.0450 | <i>L. braziliensis</i> | 354 | 1605 | 1958 |
| LbrM02_V2.0450 | <i>L. braziliensis</i> | 106 | 2054 | 2159 |
| LbrM02_V2.0450 | <i>L. braziliensis</i> | 342 | 2177 | 2518 |
| LbrM02_V2.0450 | <i>L. braziliensis</i> | 166 | 2543 | 2708 |
| LbrM02_V2.0450 | <i>L. braziliensis</i> | 113 | 2731 | 2843 |
| LbrM02_V2.0460 | <i>L. braziliensis</i> | 146 | 1    | 146  |
| LbrM02_V2.0470 | <i>L. braziliensis</i> | 49  | 32   | 80   |
| LbrM02_V2.0470 | <i>L. braziliensis</i> | 46  | 110  | 155  |
| LbrM02_V2.0470 | <i>L. braziliensis</i> | 61  | 175  | 235  |
| LbrM02_V2.0470 | <i>L. braziliensis</i> | 207 | 256  | 462  |
| LbrM02_V2.0470 | <i>L. braziliensis</i> | 141 | 508  | 648  |
| LbrM02_V2.0470 | <i>L. braziliensis</i> | 66  | 681  | 746  |
| LbrM02_V2.0470 | <i>L. braziliensis</i> | 128 | 800  | 927  |
| LbrM02_V2.0470 | <i>L. braziliensis</i> | 89  | 996  | 1084 |
| LbrM02_V2.0480 | <i>L. braziliensis</i> | 104 | 1    | 104  |
| LbrM02_V2.0480 | <i>L. braziliensis</i> | 57  | 140  | 196  |
| LbrM02_V2.0480 | <i>L. braziliensis</i> | 78  | 513  | 590  |
| LbrM02_V2.0490 | <i>L. braziliensis</i> | 137 | 34   | 170  |
| LbrM02_V2.0500 | <i>L. braziliensis</i> | 122 | 64   | 185  |
| LbrM02_V2.0500 | <i>L. braziliensis</i> | 95  | 232  | 326  |
| LbrM02_V2.0500 | <i>L. braziliensis</i> | 77  | 359  | 435  |
| LbrM02_V2.0500 | <i>L. braziliensis</i> | 62  | 469  | 530  |
| LbrM02_V2.0500 | <i>L. braziliensis</i> | 172 | 546  | 717  |
| LbrM02_V2.0510 | <i>L. braziliensis</i> | 61  | 161  | 221  |
| LbrM02_V2.0510 | <i>L. braziliensis</i> | 50  | 251  | 300  |
| LbrM02_V2.0510 | <i>L. braziliensis</i> | 48  | 463  | 510  |
| LbrM02_V2.0520 | <i>L. braziliensis</i> | 87  | 19   | 105  |
| LbrM02_V2.0530 | <i>L. braziliensis</i> | 68  | 1    | 68   |
| LbrM02_V2.0530 | <i>L. braziliensis</i> | 75  | 436  | 510  |
| LbrM02_V2.0530 | <i>L. braziliensis</i> | 284 | 552  | 835  |
| LbrM02_V2.0540 | <i>L. braziliensis</i> | 180 | 1    | 180  |
| LbrM02_V2.0540 | <i>L. braziliensis</i> | 50  | 205  | 254  |
| LbrM02_V2.0540 | <i>L. braziliensis</i> | 157 | 260  | 416  |
| LbrM02_V2.0540 | <i>L. braziliensis</i> | 125 | 656  | 780  |
| LbrM02_V2.0540 | <i>L. braziliensis</i> | 82  | 804  | 885  |
| LbrM02_V2.0540 | <i>L. braziliensis</i> | 56  | 1006 | 1061 |
| LbrM02_V2.0540 | <i>L. braziliensis</i> | 57  | 1075 | 1131 |
| LbrM02_V2.0540 | <i>L. braziliensis</i> | 86  | 1363 | 1448 |
| LbrM02_V2.0550 | <i>L. braziliensis</i> | 193 | 283  | 475  |
| LbrM02_V2.0550 | <i>L. braziliensis</i> | 63  | 498  | 560  |
| LbrM02_V2.0550 | <i>L. braziliensis</i> | 136 | 600  | 735  |
| LbrM02_V2.0560 | <i>L. braziliensis</i> | 53  | 826  | 878  |
| LbrM02_V2.0560 | <i>L. braziliensis</i> | 90  | 923  | 1012 |
| LbrM02_V2.0560 | <i>L. braziliensis</i> | 91  | 1104 | 1194 |
| LbrM02_V2.0560 | <i>L. braziliensis</i> | 45  | 1622 | 1666 |

|                |                        |     |      |      |
|----------------|------------------------|-----|------|------|
| LbrM02_V2.0560 | <i>L. braziliensis</i> | 85  | 1777 | 1861 |
| LbrM02_V2.0560 | <i>L. braziliensis</i> | 195 | 2029 | 2223 |
| LbrM02_V2.0560 | <i>L. braziliensis</i> | 55  | 2241 | 2295 |
| LbrM02_V2.0560 | <i>L. braziliensis</i> | 120 | 2528 | 2647 |
| LbrM02_V2.0560 | <i>L. braziliensis</i> | 67  | 2650 | 2716 |
| LbrM02_V2.0560 | <i>L. braziliensis</i> | 71  | 2927 | 2997 |
| LbrM02_V2.0560 | <i>L. braziliensis</i> | 40  | 3018 | 3057 |
| LbrM02_V2.0560 | <i>L. braziliensis</i> | 64  | 3149 | 3212 |
| LbrM02_V2.0560 | <i>L. braziliensis</i> | 47  | 3344 | 3390 |
| LbrM02_V2.0560 | <i>L. braziliensis</i> | 263 | 3425 | 3687 |
| LbrM02_V2.0570 | <i>L. braziliensis</i> | 148 | 1    | 148  |
| LbrM02_V2.0570 | <i>L. braziliensis</i> | 101 | 269  | 369  |
| LbrM02_V2.0570 | <i>L. braziliensis</i> | 128 | 378  | 505  |
| LbrM02_V2.0590 | <i>L. braziliensis</i> | 84  | 1    | 84   |
| LbrM02_V2.0590 | <i>L. braziliensis</i> | 217 | 105  | 321  |
| LbrM02_V2.0600 | <i>L. braziliensis</i> | 77  | 18   | 94   |
| LbrM02_V2.0610 | <i>L. braziliensis</i> | 162 | 62   | 223  |
| LbrM02_V2.0610 | <i>L. braziliensis</i> | 55  | 286  | 340  |
| LbrM02_V2.0620 | <i>L. braziliensis</i> | 76  | 85   | 160  |
| LbrM02_V2.0620 | <i>L. braziliensis</i> | 171 | 263  | 433  |
| LbrM02_V2.0620 | <i>L. braziliensis</i> | 40  | 1366 | 1405 |
| LbrM02_V2.0630 | <i>L. braziliensis</i> | 44  | 1    | 44   |
| LbrM02_V2.0630 | <i>L. braziliensis</i> | 79  | 108  | 186  |
| LbrM02_V2.0640 | <i>L. braziliensis</i> | 417 | 1    | 417  |
| LbrM02_V2.0640 | <i>L. braziliensis</i> | 75  | 426  | 500  |
| LbrM02_V2.0640 | <i>L. braziliensis</i> | 144 | 763  | 906  |
| LbrM02_V2.0660 | <i>L. braziliensis</i> | 115 | 1    | 115  |
| LbrM02_V2.0660 | <i>L. braziliensis</i> | 53  | 253  | 305  |
| LbrM02_V2.0680 | <i>L. braziliensis</i> | 59  | 1    | 59   |
| LbrM02_V2.0680 | <i>L. braziliensis</i> | 103 | 68   | 170  |
| LbrM02_V2.0680 | <i>L. braziliensis</i> | 93  | 176  | 268  |
| LbrM02_V2.0680 | <i>L. braziliensis</i> | 64  | 302  | 365  |
| LbrM02_V2.0680 | <i>L. braziliensis</i> | 104 | 411  | 514  |
| LbrM02_V2.0690 | <i>L. braziliensis</i> | 65  | 1    | 65   |
| LbrM02_V2.0690 | <i>L. braziliensis</i> | 133 | 395  | 527  |
| LbrM02_V2.0700 | <i>L. braziliensis</i> | 45  | 17   | 61   |
| LbrM02_V2.0700 | <i>L. braziliensis</i> | 67  | 97   | 163  |
| LbrM02_V2.0700 | <i>L. braziliensis</i> | 72  | 186  | 257  |
| LbrM02_V2.0730 | <i>L. braziliensis</i> | 87  | 1    | 87   |
| LbrM02_V2.0730 | <i>L. braziliensis</i> | 52  | 133  | 184  |
| LbrM02_V2.0730 | <i>L. braziliensis</i> | 203 | 189  | 391  |
| LbrM02_V2.0730 | <i>L. braziliensis</i> | 603 | 403  | 1005 |
| LbrM02_V2.0730 | <i>L. braziliensis</i> | 685 | 1019 | 1703 |
| LbrM02_V2.0730 | <i>L. braziliensis</i> | 139 | 1827 | 1965 |
| LbrM02_V2.0740 | <i>L. braziliensis</i> | 364 | 1    | 364  |
| LbrM02_V2.0740 | <i>L. braziliensis</i> | 157 | 378  | 534  |
| LbrM02_V2.0750 | <i>L. braziliensis</i> | 64  | 1    | 64   |

|                |                        |     |      |      |
|----------------|------------------------|-----|------|------|
| LbrM02_V2.0750 | <i>L. braziliensis</i> | 41  | 106  | 146  |
| LbrM02_V2.0750 | <i>L. braziliensis</i> | 59  | 190  | 248  |
| LbrM02_V2.0750 | <i>L. braziliensis</i> | 57  | 271  | 327  |
| LbrM02_V2.0750 | <i>L. braziliensis</i> | 77  | 368  | 444  |
| LbrM02_V2.0750 | <i>L. braziliensis</i> | 73  | 466  | 538  |
| LbrM02_V2.0750 | <i>L. braziliensis</i> | 82  | 560  | 641  |
| LbrM02_V2.0750 | <i>L. braziliensis</i> | 56  | 679  | 734  |
| LbrM02_V2.0750 | <i>L. braziliensis</i> | 77  | 760  | 836  |
| LbrM02_V2.0750 | <i>L. braziliensis</i> | 191 | 1166 | 1356 |
| LbrM02_V2.0750 | <i>L. braziliensis</i> | 66  | 1379 | 1444 |
| LbrM02_V2.0750 | <i>L. braziliensis</i> | 142 | 1475 | 1616 |
| LbrM02_V2.0760 | <i>L. braziliensis</i> | 152 | 287  | 438  |
| LbrM02_V2.0770 | <i>L. braziliensis</i> | 45  | 17   | 61   |
| LbrM02_V2.0770 | <i>L. braziliensis</i> | 58  | 107  | 164  |
| LbrM02_V2.0770 | <i>L. braziliensis</i> | 73  | 185  | 257  |
| LbrM02_V2.0770 | <i>L. braziliensis</i> | 86  | 283  | 368  |
| LbrM03_V2.0010 | <i>L. braziliensis</i> | 76  | 195  | 270  |
| LbrM03_V2.0020 | <i>L. braziliensis</i> | 42  | 1    | 42   |
| LbrM03_V2.0020 | <i>L. braziliensis</i> | 79  | 86   | 164  |
| LbrM03_V2.0020 | <i>L. braziliensis</i> | 79  | 86   | 164  |
| LbrM03_V2.0040 | <i>L. braziliensis</i> | 93  | 17   | 109  |
| LbrM03_V2.0090 | <i>L. braziliensis</i> | 108 | 1    | 108  |
| LbrM03_V2.0100 | <i>L. braziliensis</i> | 59  | 83   | 141  |
| LbrM03_V2.0100 | <i>L. braziliensis</i> | 40  | 528  | 567  |
| LbrM03_V2.0100 | <i>L. braziliensis</i> | 40  | 528  | 567  |
| LbrM03_V2.0110 | <i>L. braziliensis</i> | 50  | 11   | 60   |
| LbrM03_V2.0120 | <i>L. braziliensis</i> | 337 | 172  | 508  |
| LbrM03_V2.0120 | <i>L. braziliensis</i> | 86  | 589  | 674  |
| LbrM03_V2.0120 | <i>L. braziliensis</i> | 193 | 706  | 898  |
| LbrM03_V2.0130 | <i>L. braziliensis</i> | 485 | 162  | 646  |
| LbrM03_V2.0130 | <i>L. braziliensis</i> | 141 | 729  | 869  |
| LbrM03_V2.0150 | <i>L. braziliensis</i> | 95  | 45   | 139  |
| LbrM03_V2.0170 | <i>L. braziliensis</i> | 108 | 91   | 198  |
| LbrM03_V2.0170 | <i>L. braziliensis</i> | 44  | 438  | 481  |
| LbrM03_V2.0170 | <i>L. braziliensis</i> | 44  | 438  | 481  |
| LbrM03_V2.0180 | <i>L. braziliensis</i> | 112 | 58   | 169  |
| LbrM03_V2.0190 | <i>L. braziliensis</i> | 193 | 1    | 193  |
| LbrM03_V2.0190 | <i>L. braziliensis</i> | 48  | 368  | 415  |
| LbrM03_V2.0190 | <i>L. braziliensis</i> | 48  | 368  | 415  |
| LbrM03_V2.0200 | <i>L. braziliensis</i> | 52  | 159  | 210  |
| LbrM03_V2.0230 | <i>L. braziliensis</i> | 47  | 43   | 89   |
| LbrM03_V2.0270 | <i>L. braziliensis</i> | 52  | 1    | 52   |
| LbrM03_V2.0280 | <i>L. braziliensis</i> | 61  | 87   | 147  |
| LbrM03_V2.0280 | <i>L. braziliensis</i> | 727 | 150  | 876  |
| LbrM03_V2.0280 | <i>L. braziliensis</i> | 154 | 961  | 1114 |
| LbrM03_V2.0280 | <i>L. braziliensis</i> | 97  | 1130 | 1226 |
| LbrM03_V2.0280 | <i>L. braziliensis</i> | 96  | 1240 | 1335 |



|                |                        |     |      |      |
|----------------|------------------------|-----|------|------|
| LbrM03_V2.0280 | <i>L. braziliensis</i> | 75  | 1365 | 1439 |
| LbrM03_V2.0290 | <i>L. braziliensis</i> | 43  | 1    | 43   |
| LbrM03_V2.0290 | <i>L. braziliensis</i> | 55  | 50   | 104  |
| LbrM03_V2.0290 | <i>L. braziliensis</i> | 149 | 141  | 289  |
| LbrM03_V2.0290 | <i>L. braziliensis</i> | 124 | 382  | 505  |
| LbrM03_V2.0290 | <i>L. braziliensis</i> | 92  | 653  | 744  |
| LbrM03_V2.0290 | <i>L. braziliensis</i> | 179 | 803  | 981  |
| LbrM03_V2.0300 | <i>L. braziliensis</i> | 80  | 1    | 80   |
| LbrM03_V2.0300 | <i>L. braziliensis</i> | 230 | 94   | 323  |
| LbrM03_V2.0300 | <i>L. braziliensis</i> | 265 | 334  | 598  |
| LbrM03_V2.0300 | <i>L. braziliensis</i> | 200 | 621  | 820  |
| LbrM03_V2.0300 | <i>L. braziliensis</i> | 341 | 833  | 1173 |
| LbrM03_V2.0300 | <i>L. braziliensis</i> | 702 | 1186 | 1887 |
| LbrM03_V2.0310 | <i>L. braziliensis</i> | 100 | 1    | 100  |
| LbrM03_V2.0310 | <i>L. braziliensis</i> | 299 | 132  | 430  |
| LbrM03_V2.0310 | <i>L. braziliensis</i> | 149 | 439  | 587  |
| LbrM03_V2.0310 | <i>L. braziliensis</i> | 102 | 718  | 819  |
| LbrM03_V2.0310 | <i>L. braziliensis</i> | 119 | 828  | 946  |
| LbrM03_V2.0320 | <i>L. braziliensis</i> | 41  | 44   | 84   |
| LbrM03_V2.0320 | <i>L. braziliensis</i> | 74  | 238  | 311  |
| LbrM03_V2.0320 | <i>L. braziliensis</i> | 62  | 387  | 448  |
| LbrM03_V2.0320 | <i>L. braziliensis</i> | 45  | 635  | 679  |
| LbrM03_V2.0330 | <i>L. braziliensis</i> | 209 | 31   | 239  |
| LbrM03_V2.0340 | <i>L. braziliensis</i> | 363 | 1    | 363  |
| LbrM03_V2.0340 | <i>L. braziliensis</i> | 69  | 424  | 492  |
| LbrM03_V2.0340 | <i>L. braziliensis</i> | 188 | 599  | 786  |
| LbrM03_V2.0340 | <i>L. braziliensis</i> | 59  | 956  | 1014 |
| LbrM03_V2.0340 | <i>L. braziliensis</i> | 85  | 1022 | 1106 |
| LbrM03_V2.0340 | <i>L. braziliensis</i> | 77  | 1125 | 1201 |
| LbrM03_V2.0340 | <i>L. braziliensis</i> | 87  | 1295 | 1381 |
| LbrM03_V2.0340 | <i>L. braziliensis</i> | 102 | 1407 | 1508 |
| LbrM03_V2.0350 | <i>L. braziliensis</i> | 63  | 1    | 63   |
| LbrM03_V2.0360 | <i>L. braziliensis</i> | 135 | 1    | 135  |
| LbrM03_V2.0370 | <i>L. braziliensis</i> | 47  | 36   | 82   |
| LbrM03_V2.0370 | <i>L. braziliensis</i> | 110 | 289  | 398  |
| LbrM03_V2.0370 | <i>L. braziliensis</i> | 48  | 640  | 687  |
| LbrM03_V2.0380 | <i>L. braziliensis</i> | 213 | 1    | 213  |
| LbrM03_V2.0380 | <i>L. braziliensis</i> | 79  | 383  | 461  |
| LbrM03_V2.0380 | <i>L. braziliensis</i> | 106 | 487  | 592  |
| LbrM03_V2.0380 | <i>L. braziliensis</i> | 56  | 638  | 693  |
| LbrM03_V2.0380 | <i>L. braziliensis</i> | 52  | 782  | 833  |
| LbrM03_V2.0380 | <i>L. braziliensis</i> | 40  | 976  | 1015 |
| LbrM03_V2.0380 | <i>L. braziliensis</i> | 43  | 1149 | 1191 |
| LbrM03_V2.0380 | <i>L. braziliensis</i> | 121 | 1312 | 1432 |
| LbrM03_V2.0380 | <i>L. braziliensis</i> | 103 | 1493 | 1595 |
| LbrM03_V2.0380 | <i>L. braziliensis</i> | 65  | 1690 | 1754 |
| LbrM03_V2.0390 | <i>L. braziliensis</i> | 55  | 52   | 106  |

|                |                        |     |      |      |
|----------------|------------------------|-----|------|------|
| LbrM03_V2.0400 | <i>L. braziliensis</i> | 56  | 52   | 107  |
| LbrM03_V2.0410 | <i>L. braziliensis</i> | 124 | 74   | 197  |
| LbrM03_V2.0410 | <i>L. braziliensis</i> | 173 | 316  | 488  |
| LbrM03_V2.0410 | <i>L. braziliensis</i> | 66  | 530  | 595  |
| LbrM03_V2.0410 | <i>L. braziliensis</i> | 87  | 748  | 834  |
| LbrM03_V2.0410 | <i>L. braziliensis</i> | 199 | 860  | 1058 |
| LbrM03_V2.0410 | <i>L. braziliensis</i> | 52  | 1127 | 1178 |
| LbrM03_V2.0410 | <i>L. braziliensis</i> | 69  | 1213 | 1281 |
| LbrM03_V2.0410 | <i>L. braziliensis</i> | 48  | 1307 | 1354 |
| LbrM03_V2.0410 | <i>L. braziliensis</i> | 54  | 1436 | 1489 |
| LbrM03_V2.0420 | <i>L. braziliensis</i> | 101 | 1    | 101  |
| LbrM03_V2.0420 | <i>L. braziliensis</i> | 795 | 126  | 920  |
| LbrM03_V2.0420 | <i>L. braziliensis</i> | 546 | 950  | 1495 |
| LbrM03_V2.0420 | <i>L. braziliensis</i> | 68  | 1567 | 1634 |
| LbrM03_V2.0420 | <i>L. braziliensis</i> | 80  | 1659 | 1738 |
| LbrM03_V2.0420 | <i>L. braziliensis</i> | 77  | 1819 | 1895 |
| LbrM03_V2.0420 | <i>L. braziliensis</i> | 81  | 1898 | 1978 |
| LbrM03_V2.0420 | <i>L. braziliensis</i> | 65  | 2058 | 2122 |
| LbrM03_V2.0420 | <i>L. braziliensis</i> | 45  | 2207 | 2251 |
| LbrM03_V2.0430 | <i>L. braziliensis</i> | 341 | 1    | 341  |
| LbrM03_V2.0430 | <i>L. braziliensis</i> | 42  | 524  | 565  |
| LbrM03_V2.0430 | <i>L. braziliensis</i> | 45  | 637  | 681  |
| LbrM03_V2.0430 | <i>L. braziliensis</i> | 88  | 745  | 832  |
| LbrM03_V2.0440 | <i>L. braziliensis</i> | 60  | 92   | 151  |
| LbrM03_V2.0440 | <i>L. braziliensis</i> | 67  | 798  | 864  |
| LbrM03_V2.0440 | <i>L. braziliensis</i> | 45  | 914  | 958  |
| LbrM03_V2.0440 | <i>L. braziliensis</i> | 62  | 970  | 1031 |
| LbrM03_V2.0440 | <i>L. braziliensis</i> | 76  | 1064 | 1139 |
| LbrM03_V2.0440 | <i>L. braziliensis</i> | 65  | 1180 | 1244 |
| LbrM03_V2.0440 | <i>L. braziliensis</i> | 80  | 1283 | 1362 |
| LbrM03_V2.0440 | <i>L. braziliensis</i> | 60  | 1471 | 1530 |
| LbrM03_V2.0440 | <i>L. braziliensis</i> | 96  | 1624 | 1719 |
| LbrM03_V2.0450 | <i>L. braziliensis</i> | 50  | 1    | 50   |
| LbrM03_V2.0460 | <i>L. braziliensis</i> | 81  | 1    | 81   |
| LbrM03_V2.0460 | <i>L. braziliensis</i> | 51  | 231  | 281  |
| LbrM03_V2.0460 | <i>L. braziliensis</i> | 43  | 352  | 394  |
| LbrM03_V2.0460 | <i>L. braziliensis</i> | 90  | 420  | 509  |
| LbrM03_V2.0460 | <i>L. braziliensis</i> | 391 | 710  | 1100 |
| LbrM03_V2.0460 | <i>L. braziliensis</i> | 86  | 1293 | 1378 |
| LbrM03_V2.0470 | <i>L. braziliensis</i> | 89  | 1    | 89   |
| LbrM03_V2.0470 | <i>L. braziliensis</i> | 276 | 119  | 394  |
| LbrM03_V2.0470 | <i>L. braziliensis</i> | 89  | 449  | 537  |
| LbrM03_V2.0470 | <i>L. braziliensis</i> | 51  | 564  | 614  |
| LbrM03_V2.0490 | <i>L. braziliensis</i> | 100 | 81   | 180  |
| LbrM03_V2.0500 | <i>L. braziliensis</i> | 71  | 24   | 94   |
| LbrM03_V2.0500 | <i>L. braziliensis</i> | 335 | 126  | 460  |
| LbrM03_V2.0500 | <i>L. braziliensis</i> | 106 | 563  | 668  |

|                |                        |     |      |      |
|----------------|------------------------|-----|------|------|
| LbrM03_V2.0500 | <i>L. braziliensis</i> | 61  | 839  | 899  |
| LbrM03_V2.0520 | <i>L. braziliensis</i> | 53  | 124  | 176  |
| LbrM03_V2.0520 | <i>L. braziliensis</i> | 49  | 549  | 597  |
| LbrM03_V2.0520 | <i>L. braziliensis</i> | 50  | 633  | 682  |
| LbrM03_V2.0540 | <i>L. braziliensis</i> | 57  | 53   | 109  |
| LbrM03_V2.0540 | <i>L. braziliensis</i> | 54  | 212  | 265  |
| LbrM03_V2.0550 | <i>L. braziliensis</i> | 43  | 14   | 56   |
| LbrM03_V2.0550 | <i>L. braziliensis</i> | 136 | 62   | 197  |
| LbrM03_V2.0550 | <i>L. braziliensis</i> | 61  | 487  | 547  |
| LbrM03_V2.0550 | <i>L. braziliensis</i> | 72  | 701  | 772  |
| LbrM03_V2.0560 | <i>L. braziliensis</i> | 104 | 8    | 111  |
| LbrM03_V2.0560 | <i>L. braziliensis</i> | 63  | 136  | 198  |
| LbrM03_V2.0560 | <i>L. braziliensis</i> | 57  | 514  | 570  |
| LbrM03_V2.0590 | <i>L. braziliensis</i> | 43  | 29   | 71   |
| LbrM03_V2.0590 | <i>L. braziliensis</i> | 61  | 284  | 344  |
| LbrM03_V2.0590 | <i>L. braziliensis</i> | 67  | 709  | 775  |
| LbrM03_V2.0590 | <i>L. braziliensis</i> | 57  | 1444 | 1500 |
| LbrM03_V2.0590 | <i>L. braziliensis</i> | 65  | 1549 | 1613 |
| LbrM03_V2.0600 | <i>L. braziliensis</i> | 58  | 21   | 78   |
| LbrM03_V2.0600 | <i>L. braziliensis</i> | 179 | 148  | 326  |
| LbrM03_V2.0600 | <i>L. braziliensis</i> | 51  | 450  | 500  |
| LbrM03_V2.0600 | <i>L. braziliensis</i> | 53  | 564  | 616  |
| LbrM03_V2.0600 | <i>L. braziliensis</i> | 148 | 640  | 787  |
| LbrM03_V2.0600 | <i>L. braziliensis</i> | 63  | 800  | 862  |
| LbrM03_V2.0600 | <i>L. braziliensis</i> | 70  | 920  | 989  |
| LbrM03_V2.0600 | <i>L. braziliensis</i> | 52  | 1029 | 1080 |
| LbrM03_V2.0600 | <i>L. braziliensis</i> | 59  | 1162 | 1220 |
| LbrM03_V2.0600 | <i>L. braziliensis</i> | 67  | 1350 | 1416 |
| LbrM03_V2.0600 | <i>L. braziliensis</i> | 70  | 1465 | 1534 |
| LbrM03_V2.0600 | <i>L. braziliensis</i> | 65  | 1682 | 1746 |
| LbrM03_V2.0600 | <i>L. braziliensis</i> | 90  | 1755 | 1844 |
| LbrM03_V2.0600 | <i>L. braziliensis</i> | 57  | 1970 | 2026 |
| LbrM03_V2.0600 | <i>L. braziliensis</i> | 133 | 2191 | 2323 |
| LbrM03_V2.0600 | <i>L. braziliensis</i> | 68  | 2361 | 2428 |
| LbrM03_V2.0600 | <i>L. braziliensis</i> | 128 | 2450 | 2577 |
| LbrM03_V2.0600 | <i>L. braziliensis</i> | 47  | 2648 | 2694 |
| LbrM03_V2.0610 | <i>L. braziliensis</i> | 59  | 43   | 101  |
| LbrM03_V2.0610 | <i>L. braziliensis</i> | 41  | 214  | 254  |
| LbrM03_V2.0610 | <i>L. braziliensis</i> | 41  | 214  | 254  |
| LbrM03_V2.0620 | <i>L. braziliensis</i> | 163 | 1    | 163  |
| LbrM03_V2.0620 | <i>L. braziliensis</i> | 56  | 274  | 329  |
| LbrM03_V2.0620 | <i>L. braziliensis</i> | 65  | 402  | 466  |
| LbrM03_V2.0620 | <i>L. braziliensis</i> | 138 | 611  | 748  |
| LbrM03_V2.0620 | <i>L. braziliensis</i> | 96  | 968  | 1063 |
| LbrM03_V2.0630 | <i>L. braziliensis</i> | 125 | 40   | 164  |
| LbrM03_V2.0630 | <i>L. braziliensis</i> | 43  | 230  | 272  |
| LbrM03_V2.0630 | <i>L. braziliensis</i> | 54  | 354  | 407  |

|                |                        |     |      |      |
|----------------|------------------------|-----|------|------|
| LbrM03_V2.0630 | <i>L. braziliensis</i> | 52  | 439  | 490  |
| LbrM03_V2.0650 | <i>L. braziliensis</i> | 79  | 1    | 79   |
| LbrM03_V2.0650 | <i>L. braziliensis</i> | 45  | 377  | 421  |
| LbrM03_V2.0650 | <i>L. braziliensis</i> | 286 | 497  | 782  |
| LbrM03_V2.0680 | <i>L. braziliensis</i> | 209 | 32   | 240  |
| LbrM03_V2.0680 | <i>L. braziliensis</i> | 221 | 262  | 482  |
| LbrM03_V2.0680 | <i>L. braziliensis</i> | 46  | 566  | 611  |
| LbrM03_V2.0680 | <i>L. braziliensis</i> | 216 | 689  | 904  |
| LbrM03_V2.0680 | <i>L. braziliensis</i> | 84  | 971  | 1054 |
| LbrM03_V2.0680 | <i>L. braziliensis</i> | 428 | 1064 | 1491 |
| LbrM03_V2.0680 | <i>L. braziliensis</i> | 527 | 1523 | 2049 |
| LbrM03_V2.0680 | <i>L. braziliensis</i> | 51  | 2058 | 2108 |
| LbrM03_V2.0680 | <i>L. braziliensis</i> | 48  | 2134 | 2181 |
| LbrM03_V2.0680 | <i>L. braziliensis</i> | 295 | 2202 | 2496 |
| LbrM03_V2.0690 | <i>L. braziliensis</i> | 84  | 20   | 103  |
| LbrM03_V2.0690 | <i>L. braziliensis</i> | 164 | 246  | 409  |
| LbrM03_V2.0700 | <i>L. braziliensis</i> | 175 | 1    | 175  |
| LbrM03_V2.0700 | <i>L. braziliensis</i> | 142 | 196  | 337  |
| LbrM03_V2.0700 | <i>L. braziliensis</i> | 330 | 435  | 764  |
| LbrM03_V2.0700 | <i>L. braziliensis</i> | 391 | 813  | 1203 |
| LbrM03_V2.0700 | <i>L. braziliensis</i> | 161 | 1504 | 1664 |
| LbrM03_V2.0700 | <i>L. braziliensis</i> | 52  | 1709 | 1760 |
| LbrM03_V2.0700 | <i>L. braziliensis</i> | 75  | 1898 | 1972 |
| LbrM03_V2.0720 | <i>L. braziliensis</i> | 123 | 1    | 123  |
| LbrM03_V2.0720 | <i>L. braziliensis</i> | 146 | 167  | 312  |
| LbrM03_V2.0720 | <i>L. braziliensis</i> | 204 | 330  | 533  |
| LbrM03_V2.0720 | <i>L. braziliensis</i> | 41  | 563  | 603  |
| LbrM03_V2.0720 | <i>L. braziliensis</i> | 134 | 757  | 890  |
| LbrM03_V2.0720 | <i>L. braziliensis</i> | 74  | 927  | 1000 |
| LbrM03_V2.0720 | <i>L. braziliensis</i> | 47  | 1053 | 1099 |
| LbrM03_V2.0720 | <i>L. braziliensis</i> | 100 | 1175 | 1274 |
| LbrM03_V2.0730 | <i>L. braziliensis</i> | 249 | 1    | 249  |
| LbrM03_V2.0730 | <i>L. braziliensis</i> | 101 | 282  | 382  |
| LbrM03_V2.0730 | <i>L. braziliensis</i> | 251 | 386  | 636  |
| LbrM03_V2.0730 | <i>L. braziliensis</i> | 111 | 661  | 771  |
| LbrM03_V2.0730 | <i>L. braziliensis</i> | 60  | 808  | 867  |
| LbrM03_V2.0730 | <i>L. braziliensis</i> | 666 | 878  | 1543 |
| LbrM03_V2.0730 | <i>L. braziliensis</i> | 74  | 1642 | 1715 |
| LbrM03_V2.0730 | <i>L. braziliensis</i> | 95  | 1780 | 1874 |
| LbrM03_V2.0730 | <i>L. braziliensis</i> | 170 | 1953 | 2122 |
| LbrM03_V2.0730 | <i>L. braziliensis</i> | 417 | 2213 | 2629 |
| LbrM03_V2.0730 | <i>L. braziliensis</i> | 229 | 2642 | 2870 |
| LbrM03_V2.0740 | <i>L. braziliensis</i> | 52  | 46   | 97   |
| LbrM03_V2.0750 | <i>L. braziliensis</i> | 90  | 55   | 144  |
| LbrM03_V2.0750 | <i>L. braziliensis</i> | 59  | 225  | 283  |
| LbrM03_V2.0750 | <i>L. braziliensis</i> | 80  | 494  | 573  |
| LbrM03_V2.0750 | <i>L. braziliensis</i> | 44  | 711  | 754  |

|                |                        |     |      |      |
|----------------|------------------------|-----|------|------|
| LbrM03_V2.0750 | <i>L. braziliensis</i> | 114 | 865  | 978  |
| LbrM03_V2.0760 | <i>L. braziliensis</i> | 90  | 1    | 90   |
| LbrM03_V2.0760 | <i>L. braziliensis</i> | 540 | 121  | 660  |
| LbrM03_V2.0760 | <i>L. braziliensis</i> | 60  | 671  | 730  |
| LbrM03_V2.0760 | <i>L. braziliensis</i> | 57  | 743  | 799  |
| LbrM03_V2.0760 | <i>L. braziliensis</i> | 49  | 823  | 871  |
| LbrM03_V2.0760 | <i>L. braziliensis</i> | 54  | 933  | 986  |
| LbrM03_V2.0760 | <i>L. braziliensis</i> | 288 | 1145 | 1432 |
| LbrM03_V2.0760 | <i>L. braziliensis</i> | 76  | 1458 | 1533 |
| LbrM03_V2.0760 | <i>L. braziliensis</i> | 224 | 1538 | 1761 |
| LbrM03_V2.0760 | <i>L. braziliensis</i> | 95  | 1853 | 1947 |
| LbrM03_V2.0760 | <i>L. braziliensis</i> | 280 | 1951 | 2230 |
| LbrM03_V2.0770 | <i>L. braziliensis</i> | 116 | 39   | 154  |
| LbrM03_V2.0770 | <i>L. braziliensis</i> | 57  | 353  | 409  |
| LbrM03_V2.0770 | <i>L. braziliensis</i> | 87  | 713  | 799  |
| LbrM03_V2.0770 | <i>L. braziliensis</i> | 100 | 1022 | 1121 |
| LbrM03_V2.0780 | <i>L. braziliensis</i> | 276 | 159  | 434  |
| LbrM03_V2.0780 | <i>L. braziliensis</i> | 200 | 694  | 893  |
| LbrM03_V2.0780 | <i>L. braziliensis</i> | 326 | 895  | 1220 |
| LbrM03_V2.0790 | <i>L. braziliensis</i> | 111 | 159  | 269  |
| LbrM03_V2.0790 | <i>L. braziliensis</i> | 40  | 402  | 441  |
| LbrM03_V2.0790 | <i>L. braziliensis</i> | 97  | 521  | 617  |
| LbrM03_V2.0790 | <i>L. braziliensis</i> | 46  | 703  | 748  |
| LbrM03_V2.0790 | <i>L. braziliensis</i> | 50  | 756  | 805  |
| LbrM03_V2.0790 | <i>L. braziliensis</i> | 55  | 1246 | 1300 |
| LbrM03_V2.0790 | <i>L. braziliensis</i> | 51  | 1726 | 1776 |
| LbrM03_V2.0800 | <i>L. braziliensis</i> | 103 | 62   | 164  |
| LbrM03_V2.0800 | <i>L. braziliensis</i> | 98  | 203  | 300  |
| LbrM03_V2.0800 | <i>L. braziliensis</i> | 144 | 429  | 572  |
| LbrM03_V2.0800 | <i>L. braziliensis</i> | 108 | 603  | 710  |
| LbrM03_V2.0810 | <i>L. braziliensis</i> | 49  | 211  | 259  |
| LbrM03_V2.0810 | <i>L. braziliensis</i> | 79  | 294  | 372  |
| LbrM03_V2.0850 | <i>L. braziliensis</i> | 138 | 8    | 145  |
| LbrM03_V2.0890 | <i>L. braziliensis</i> | 60  | 354  | 413  |
| LbrM03_V2.0920 | <i>L. braziliensis</i> | 43  | 32   | 74   |
| LbrM03_V2.0950 | <i>L. braziliensis</i> | 210 | 1    | 210  |
| LbrM03_V2.0950 | <i>L. braziliensis</i> | 155 | 244  | 398  |
| LbrM03_V2.0950 | <i>L. braziliensis</i> | 42  | 417  | 458  |
| LbrM03_V2.0950 | <i>L. braziliensis</i> | 60  | 460  | 519  |
| LbrM03_V2.0950 | <i>L. braziliensis</i> | 68  | 549  | 616  |
| LbrM03_V2.0950 | <i>L. braziliensis</i> | 98  | 637  | 734  |
| LbrM03_V2.0950 | <i>L. braziliensis</i> | 183 | 828  | 1010 |
| LbrM03_V2.0960 | <i>L. braziliensis</i> | 47  | 1    | 47   |
| LbrM03_V2.0960 | <i>L. braziliensis</i> | 48  | 366  | 413  |
| LbrM03_V2.0960 | <i>L. braziliensis</i> | 51  | 732  | 782  |
| LbrM03_V2.0970 | <i>L. braziliensis</i> | 173 | 186  | 358  |
| LbrM03_V2.0970 | <i>L. braziliensis</i> | 67  | 1097 | 1163 |

|                |                        |     |      |      |
|----------------|------------------------|-----|------|------|
| LbrM03_V2.0970 | <i>L. braziliensis</i> | 114 | 1474 | 1587 |
| LbrM03_V2.0970 | <i>L. braziliensis</i> | 59  | 1798 | 1856 |
| LbrM03_V2.0970 | <i>L. braziliensis</i> | 92  | 1897 | 1988 |
| LbrM03_V2.0970 | <i>L. braziliensis</i> | 40  | 2019 | 2058 |
| LbrM04_V2.0050 | <i>L. braziliensis</i> | 45  | 218  | 262  |
| LbrM04_V2.0070 | <i>L. braziliensis</i> | 86  | 1    | 86   |
| LbrM04_V2.0070 | <i>L. braziliensis</i> | 80  | 501  | 580  |
| LbrM04_V2.0070 | <i>L. braziliensis</i> | 53  | 692  | 744  |
| LbrM04_V2.0080 | <i>L. braziliensis</i> | 64  | 40   | 103  |
| LbrM04_V2.0080 | <i>L. braziliensis</i> | 45  | 171  | 215  |
| LbrM04_V2.0100 | <i>L. braziliensis</i> | 202 | 1    | 202  |
| LbrM04_V2.0100 | <i>L. braziliensis</i> | 127 | 250  | 376  |
| LbrM04_V2.0100 | <i>L. braziliensis</i> | 143 | 407  | 549  |
| LbrM04_V2.0110 | <i>L. braziliensis</i> | 191 | 1    | 191  |
| LbrM04_V2.0130 | <i>L. braziliensis</i> | 59  | 1    | 59   |
| LbrM04_V2.0130 | <i>L. braziliensis</i> | 78  | 77   | 154  |
| LbrM04_V2.0130 | <i>L. braziliensis</i> | 78  | 77   | 154  |
| LbrM04_V2.0140 | <i>L. braziliensis</i> | 50  | 1027 | 1076 |
| LbrM04_V2.0140 | <i>L. braziliensis</i> | 63  | 1261 | 1323 |
| LbrM04_V2.0140 | <i>L. braziliensis</i> | 63  | 1261 | 1323 |
| LbrM04_V2.0150 | <i>L. braziliensis</i> | 101 | 57   | 157  |
| LbrM04_V2.0150 | <i>L. braziliensis</i> | 113 | 207  | 319  |
| LbrM04_V2.0150 | <i>L. braziliensis</i> | 119 | 478  | 596  |
| LbrM04_V2.0160 | <i>L. braziliensis</i> | 71  | 77   | 147  |
| LbrM04_V2.0160 | <i>L. braziliensis</i> | 111 | 235  | 345  |
| LbrM04_V2.0180 | <i>L. braziliensis</i> | 134 | 25   | 158  |
| LbrM04_V2.0190 | <i>L. braziliensis</i> | 103 | 1    | 103  |
| LbrM04_V2.0190 | <i>L. braziliensis</i> | 138 | 124  | 261  |
| LbrM04_V2.0190 | <i>L. braziliensis</i> | 41  | 428  | 468  |
| LbrM04_V2.0200 | <i>L. braziliensis</i> | 80  | 11   | 90   |
| LbrM04_V2.0200 | <i>L. braziliensis</i> | 98  | 134  | 231  |
| LbrM04_V2.0200 | <i>L. braziliensis</i> | 98  | 134  | 231  |
| LbrM04_V2.0210 | <i>L. braziliensis</i> | 67  | 1    | 67   |
| LbrM04_V2.0210 | <i>L. braziliensis</i> | 46  | 110  | 155  |
| LbrM04_V2.0210 | <i>L. braziliensis</i> | 46  | 110  | 155  |
| LbrM04_V2.0220 | <i>L. braziliensis</i> | 47  | 1    | 47   |
| LbrM04_V2.0220 | <i>L. braziliensis</i> | 48  | 104  | 151  |
| LbrM04_V2.0220 | <i>L. braziliensis</i> | 107 | 425  | 531  |
| LbrM04_V2.0230 | <i>L. braziliensis</i> | 97  | 373  | 469  |
| LbrM04_V2.0240 | <i>L. braziliensis</i> | 45  | 53   | 97   |
| LbrM04_V2.0240 | <i>L. braziliensis</i> | 77  | 251  | 327  |
| LbrM04_V2.0240 | <i>L. braziliensis</i> | 71  | 372  | 442  |
| LbrM04_V2.0250 | <i>L. braziliensis</i> | 43  | 55   | 97   |
| LbrM04_V2.0250 | <i>L. braziliensis</i> | 77  | 251  | 327  |
| LbrM04_V2.0250 | <i>L. braziliensis</i> | 70  | 373  | 442  |
| LbrM04_V2.0260 | <i>L. braziliensis</i> | 163 | 230  | 392  |
| LbrM04_V2.0270 | <i>L. braziliensis</i> | 66  | 293  | 358  |

|                |                        |     |      |      |
|----------------|------------------------|-----|------|------|
| LbrM04_V2.0280 | <i>L. braziliensis</i> | 110 | 21   | 130  |
| LbrM04_V2.0290 | <i>L. braziliensis</i> | 135 | 223  | 357  |
| LbrM04_V2.0290 | <i>L. braziliensis</i> | 75  | 493  | 567  |
| LbrM04_V2.0290 | <i>L. braziliensis</i> | 84  | 619  | 702  |
| LbrM04_V2.0290 | <i>L. braziliensis</i> | 119 | 745  | 863  |
| LbrM04_V2.0290 | <i>L. braziliensis</i> | 58  | 897  | 954  |
| LbrM04_V2.0300 | <i>L. braziliensis</i> | 42  | 1    | 42   |
| LbrM04_V2.0300 | <i>L. braziliensis</i> | 54  | 80   | 133  |
| LbrM04_V2.0300 | <i>L. braziliensis</i> | 48  | 228  | 275  |
| LbrM04_V2.0310 | <i>L. braziliensis</i> | 43  | 69   | 111  |
| LbrM04_V2.0310 | <i>L. braziliensis</i> | 61  | 235  | 295  |
| LbrM04_V2.0320 | <i>L. braziliensis</i> | 265 | 1    | 265  |
| LbrM04_V2.0320 | <i>L. braziliensis</i> | 62  | 545  | 606  |
| LbrM04_V2.0320 | <i>L. braziliensis</i> | 62  | 939  | 1000 |
| LbrM04_V2.0320 | <i>L. braziliensis</i> | 50  | 1276 | 1325 |
| LbrM04_V2.0320 | <i>L. braziliensis</i> | 254 | 1689 | 1942 |
| LbrM04_V2.0350 | <i>L. braziliensis</i> | 49  | 442  | 490  |
| LbrM04_V2.0360 | <i>L. braziliensis</i> | 40  | 17   | 56   |
| LbrM04_V2.0360 | <i>L. braziliensis</i> | 42  | 360  | 401  |
| LbrM04_V2.0360 | <i>L. braziliensis</i> | 42  | 425  | 466  |
| LbrM04_V2.0380 | <i>L. braziliensis</i> | 214 | 1    | 214  |
| LbrM04_V2.0380 | <i>L. braziliensis</i> | 73  | 218  | 290  |
| LbrM04_V2.0380 | <i>L. braziliensis</i> | 358 | 372  | 729  |
| LbrM04_V2.0380 | <i>L. braziliensis</i> | 139 | 740  | 878  |
| LbrM04_V2.0380 | <i>L. braziliensis</i> | 83  | 924  | 1006 |
| LbrM04_V2.0380 | <i>L. braziliensis</i> | 167 | 1126 | 1292 |
| LbrM04_V2.0380 | <i>L. braziliensis</i> | 54  | 1318 | 1371 |
| LbrM04_V2.0380 | <i>L. braziliensis</i> | 62  | 1429 | 1490 |
| LbrM04_V2.0380 | <i>L. braziliensis</i> | 49  | 1560 | 1608 |
| LbrM04_V2.0380 | <i>L. braziliensis</i> | 50  | 1734 | 1783 |
| LbrM04_V2.0380 | <i>L. braziliensis</i> | 58  | 1989 | 2046 |
| LbrM04_V2.0390 | <i>L. braziliensis</i> | 58  | 63   | 120  |
| LbrM04_V2.0390 | <i>L. braziliensis</i> | 103 | 189  | 291  |
| LbrM04_V2.0410 | <i>L. braziliensis</i> | 49  | 1    | 49   |
| LbrM04_V2.0410 | <i>L. braziliensis</i> | 77  | 281  | 357  |
| LbrM04_V2.0420 | <i>L. braziliensis</i> | 50  | 1    | 50   |
| LbrM04_V2.0420 | <i>L. braziliensis</i> | 77  | 282  | 358  |
| LbrM04_V2.0430 | <i>L. braziliensis</i> | 71  | 189  | 259  |
| LbrM04_V2.0440 | <i>L. braziliensis</i> | 50  | 1    | 50   |
| LbrM04_V2.0440 | <i>L. braziliensis</i> | 80  | 172  | 251  |
| LbrM04_V2.0450 | <i>L. braziliensis</i> | 294 | 1    | 294  |
| LbrM04_V2.0450 | <i>L. braziliensis</i> | 135 | 307  | 441  |
| LbrM04_V2.0450 | <i>L. braziliensis</i> | 308 | 534  | 841  |
| LbrM04_V2.0450 | <i>L. braziliensis</i> | 58  | 875  | 932  |
| LbrM04_V2.0450 | <i>L. braziliensis</i> | 54  | 1003 | 1056 |
| LbrM04_V2.0460 | <i>L. braziliensis</i> | 57  | 292  | 348  |
| LbrM04_V2.0480 | <i>L. braziliensis</i> | 227 | 1    | 227  |

|                |                        |     |      |      |
|----------------|------------------------|-----|------|------|
| LbrM04_V2.0480 | <i>L. braziliensis</i> | 61  | 230  | 290  |
| LbrM04_V2.0480 | <i>L. braziliensis</i> | 164 | 304  | 467  |
| LbrM04_V2.0480 | <i>L. braziliensis</i> | 344 | 514  | 857  |
| LbrM04_V2.0480 | <i>L. braziliensis</i> | 49  | 905  | 953  |
| LbrM04_V2.0480 | <i>L. braziliensis</i> | 83  | 970  | 1052 |
| LbrM04_V2.0480 | <i>L. braziliensis</i> | 45  | 1194 | 1238 |
| LbrM04_V2.0490 | <i>L. braziliensis</i> | 145 | 1    | 145  |
| LbrM04_V2.0510 | <i>L. braziliensis</i> | 44  | 1    | 44   |
| LbrM04_V2.0510 | <i>L. braziliensis</i> | 222 | 98   | 319  |
| LbrM04_V2.0510 | <i>L. braziliensis</i> | 60  | 665  | 724  |
| LbrM04_V2.0510 | <i>L. braziliensis</i> | 64  | 757  | 820  |
| LbrM04_V2.0520 | <i>L. braziliensis</i> | 50  | 139  | 188  |
| LbrM04_V2.0540 | <i>L. braziliensis</i> | 83  | 1    | 83   |
| LbrM04_V2.0540 | <i>L. braziliensis</i> | 206 | 120  | 325  |
| LbrM04_V2.0550 | <i>L. braziliensis</i> | 587 | 1    | 587  |
| LbrM04_V2.0550 | <i>L. braziliensis</i> | 435 | 619  | 1053 |
| LbrM04_V2.0550 | <i>L. braziliensis</i> | 257 | 1140 | 1396 |
| LbrM04_V2.0550 | <i>L. braziliensis</i> | 209 | 1433 | 1641 |
| LbrM04_V2.0550 | <i>L. braziliensis</i> | 71  | 1763 | 1833 |
| LbrM04_V2.0550 | <i>L. braziliensis</i> | 252 | 1933 | 2184 |
| LbrM04_V2.0550 | <i>L. braziliensis</i> | 397 | 2304 | 2700 |
| LbrM04_V2.0550 | <i>L. braziliensis</i> | 119 | 2750 | 2868 |
| LbrM04_V2.0550 | <i>L. braziliensis</i> | 66  | 2870 | 2935 |
| LbrM04_V2.0550 | <i>L. braziliensis</i> | 110 | 2946 | 3055 |
| LbrM04_V2.0560 | <i>L. braziliensis</i> | 184 | 1    | 184  |
| LbrM04_V2.0560 | <i>L. braziliensis</i> | 261 | 260  | 520  |
| LbrM04_V2.0560 | <i>L. braziliensis</i> | 346 | 667  | 1012 |
| LbrM04_V2.0560 | <i>L. braziliensis</i> | 69  | 1252 | 1320 |
| LbrM04_V2.0570 | <i>L. braziliensis</i> | 57  | 94   | 150  |
| LbrM04_V2.0570 | <i>L. braziliensis</i> | 79  | 295  | 373  |
| LbrM04_V2.0570 | <i>L. braziliensis</i> | 43  | 452  | 494  |
| LbrM04_V2.0570 | <i>L. braziliensis</i> | 97  | 871  | 967  |
| LbrM04_V2.0580 | <i>L. braziliensis</i> | 95  | 1    | 95   |
| LbrM04_V2.0580 | <i>L. braziliensis</i> | 125 | 164  | 288  |
| LbrM04_V2.0580 | <i>L. braziliensis</i> | 57  | 316  | 372  |
| LbrM04_V2.0590 | <i>L. braziliensis</i> | 69  | 42   | 110  |
| LbrM04_V2.0600 | <i>L. braziliensis</i> | 42  | 904  | 945  |
| LbrM04_V2.0600 | <i>L. braziliensis</i> | 42  | 1179 | 1220 |
| LbrM04_V2.0600 | <i>L. braziliensis</i> | 70  | 1278 | 1347 |
| LbrM04_V2.0610 | <i>L. braziliensis</i> | 88  | 200  | 287  |
| LbrM04_V2.0620 | <i>L. braziliensis</i> | 149 | 1    | 149  |
| LbrM04_V2.0620 | <i>L. braziliensis</i> | 69  | 531  | 599  |
| LbrM04_V2.0620 | <i>L. braziliensis</i> | 41  | 619  | 659  |
| LbrM04_V2.0620 | <i>L. braziliensis</i> | 49  | 693  | 741  |
| LbrM04_V2.0620 | <i>L. braziliensis</i> | 70  | 772  | 841  |
| LbrM04_V2.0620 | <i>L. braziliensis</i> | 58  | 1024 | 1081 |
| LbrM04_V2.0620 | <i>L. braziliensis</i> | 73  | 1115 | 1187 |



|                |                        |     |      |      |
|----------------|------------------------|-----|------|------|
| LbrM04_V2.0620 | <i>L. braziliensis</i> | 54  | 1202 | 1255 |
| LbrM04_V2.0620 | <i>L. braziliensis</i> | 168 | 1327 | 1494 |
| LbrM04_V2.0620 | <i>L. braziliensis</i> | 96  | 1505 | 1600 |
| LbrM04_V2.0640 | <i>L. braziliensis</i> | 56  | 116  | 171  |
| LbrM04_V2.0670 | <i>L. braziliensis</i> | 77  | 40   | 116  |
| LbrM04_V2.0670 | <i>L. braziliensis</i> | 79  | 256  | 334  |
| LbrM04_V2.0670 | <i>L. braziliensis</i> | 92  | 468  | 559  |
| LbrM04_V2.0680 | <i>L. braziliensis</i> | 107 | 1    | 107  |
| LbrM04_V2.0680 | <i>L. braziliensis</i> | 80  | 243  | 322  |
| LbrM04_V2.0680 | <i>L. braziliensis</i> | 46  | 489  | 534  |
| LbrM04_V2.0700 | <i>L. braziliensis</i> | 131 | 62   | 192  |
| LbrM04_V2.0710 | <i>L. braziliensis</i> | 91  | 1    | 91   |
| LbrM04_V2.0710 | <i>L. braziliensis</i> | 145 | 148  | 292  |
| LbrM04_V2.0710 | <i>L. braziliensis</i> | 207 | 303  | 509  |
| LbrM04_V2.0730 | <i>L. braziliensis</i> | 130 | 85   | 214  |
| LbrM04_V2.0730 | <i>L. braziliensis</i> | 91  | 249  | 339  |
| LbrM04_V2.0730 | <i>L. braziliensis</i> | 91  | 249  | 339  |
| LbrM04_V2.0750 | <i>L. braziliensis</i> | 40  | 1    | 40   |
| LbrM04_V2.0750 | <i>L. braziliensis</i> | 70  | 90   | 159  |
| LbrM04_V2.0750 | <i>L. braziliensis</i> | 70  | 90   | 159  |
| LbrM04_V2.0760 | <i>L. braziliensis</i> | 58  | 221  | 278  |
| LbrM04_V2.0760 | <i>L. braziliensis</i> | 101 | 494  | 594  |
| LbrM04_V2.0770 | <i>L. braziliensis</i> | 461 | 393  | 853  |
| LbrM04_V2.0770 | <i>L. braziliensis</i> | 239 | 859  | 1097 |
| LbrM04_V2.0770 | <i>L. braziliensis</i> | 41  | 1099 | 1139 |
| LbrM04_V2.0780 | <i>L. braziliensis</i> | 57  | 257  | 313  |
| LbrM04_V2.0780 | <i>L. braziliensis</i> | 216 | 455  | 670  |
| LbrM04_V2.0790 | <i>L. braziliensis</i> | 588 | 1    | 588  |
| LbrM04_V2.0790 | <i>L. braziliensis</i> | 251 | 644  | 894  |
| LbrM04_V2.0790 | <i>L. braziliensis</i> | 266 | 911  | 1176 |
| LbrM04_V2.0800 | <i>L. braziliensis</i> | 124 | 1    | 124  |
| LbrM04_V2.0800 | <i>L. braziliensis</i> | 245 | 157  | 401  |
| LbrM04_V2.0800 | <i>L. braziliensis</i> | 80  | 596  | 675  |
| LbrM04_V2.0800 | <i>L. braziliensis</i> | 158 | 693  | 850  |
| LbrM04_V2.0810 | <i>L. braziliensis</i> | 75  | 1    | 75   |
| LbrM04_V2.0820 | <i>L. braziliensis</i> | 67  | 97   | 163  |
| LbrM04_V2.0820 | <i>L. braziliensis</i> | 57  | 263  | 319  |
| LbrM04_V2.0820 | <i>L. braziliensis</i> | 57  | 263  | 319  |
| LbrM04_V2.0830 | <i>L. braziliensis</i> | 319 | 1    | 319  |
| LbrM04_V2.0840 | <i>L. braziliensis</i> | 164 | 48   | 211  |
| LbrM04_V2.0840 | <i>L. braziliensis</i> | 40  | 215  | 254  |
| LbrM04_V2.0850 | <i>L. braziliensis</i> | 259 | 1    | 259  |
| LbrM04_V2.0850 | <i>L. braziliensis</i> | 899 | 264  | 1162 |
| LbrM04_V2.0850 | <i>L. braziliensis</i> | 45  | 1167 | 1211 |
| LbrM04_V2.0860 | <i>L. braziliensis</i> | 48  | 1    | 48   |
| LbrM04_V2.0860 | <i>L. braziliensis</i> | 110 | 53   | 162  |
| LbrM04_V2.0860 | <i>L. braziliensis</i> | 79  | 202  | 280  |

|                |                        |     |      |      |
|----------------|------------------------|-----|------|------|
| LbrM04_V2.0860 | <i>L. braziliensis</i> | 45  | 347  | 391  |
| LbrM04_V2.0860 | <i>L. braziliensis</i> | 51  | 537  | 587  |
| LbrM04_V2.0860 | <i>L. braziliensis</i> | 96  | 600  | 695  |
| LbrM04_V2.0860 | <i>L. braziliensis</i> | 134 | 1003 | 1136 |
| LbrM04_V2.0870 | <i>L. braziliensis</i> | 67  | 1    | 67   |
| LbrM04_V2.0890 | <i>L. braziliensis</i> | 138 | 97   | 234  |
| LbrM04_V2.0890 | <i>L. braziliensis</i> | 95  | 483  | 577  |
| LbrM04_V2.0890 | <i>L. braziliensis</i> | 46  | 691  | 736  |
| LbrM04_V2.0900 | <i>L. braziliensis</i> | 220 | 1    | 220  |
| LbrM04_V2.0900 | <i>L. braziliensis</i> | 75  | 261  | 335  |
| LbrM04_V2.0900 | <i>L. braziliensis</i> | 184 | 459  | 642  |
| LbrM04_V2.0900 | <i>L. braziliensis</i> | 48  | 688  | 735  |
| LbrM04_V2.0900 | <i>L. braziliensis</i> | 50  | 738  | 787  |
| LbrM04_V2.0900 | <i>L. braziliensis</i> | 63  | 888  | 950  |
| LbrM04_V2.0900 | <i>L. braziliensis</i> | 52  | 998  | 1049 |
| LbrM04_V2.0910 | <i>L. braziliensis</i> | 252 | 71   | 322  |
| LbrM04_V2.0910 | <i>L. braziliensis</i> | 105 | 354  | 458  |
| LbrM04_V2.0910 | <i>L. braziliensis</i> | 99  | 585  | 683  |
| LbrM04_V2.0920 | <i>L. braziliensis</i> | 434 | 1    | 434  |
| LbrM04_V2.0920 | <i>L. braziliensis</i> | 176 | 445  | 620  |
| LbrM04_V2.0930 | <i>L. braziliensis</i> | 49  | 1    | 49   |
| LbrM04_V2.0930 | <i>L. braziliensis</i> | 64  | 66   | 129  |
| LbrM04_V2.0930 | <i>L. braziliensis</i> | 47  | 433  | 479  |
| LbrM04_V2.0940 | <i>L. braziliensis</i> | 51  | 1    | 51   |
| LbrM04_V2.0940 | <i>L. braziliensis</i> | 240 | 123  | 362  |
| LbrM04_V2.0940 | <i>L. braziliensis</i> | 368 | 466  | 833  |
| LbrM04_V2.0970 | <i>L. braziliensis</i> | 250 | 41   | 290  |
| LbrM04_V2.0980 | <i>L. braziliensis</i> | 66  | 34   | 99   |
| LbrM04_V2.0980 | <i>L. braziliensis</i> | 57  | 155  | 211  |
| LbrM04_V2.0980 | <i>L. braziliensis</i> | 47  | 230  | 276  |
| LbrM04_V2.0980 | <i>L. braziliensis</i> | 118 | 281  | 398  |
| LbrM04_V2.0990 | <i>L. braziliensis</i> | 250 | 1    | 250  |
| LbrM04_V2.0990 | <i>L. braziliensis</i> | 50  | 292  | 341  |
| LbrM04_V2.0990 | <i>L. braziliensis</i> | 52  | 439  | 490  |
| LbrM04_V2.0990 | <i>L. braziliensis</i> | 113 | 740  | 852  |
| LbrM04_V2.0990 | <i>L. braziliensis</i> | 62  | 998  | 1059 |
| LbrM04_V2.0990 | <i>L. braziliensis</i> | 50  | 1134 | 1183 |
| LbrM04_V2.1000 | <i>L. braziliensis</i> | 169 | 67   | 235  |
| LbrM04_V2.1000 | <i>L. braziliensis</i> | 59  | 238  | 296  |
| LbrM04_V2.1010 | <i>L. braziliensis</i> | 49  | 713  | 761  |
| LbrM04_V2.1010 | <i>L. braziliensis</i> | 232 | 954  | 1185 |
| LbrM04_V2.1020 | <i>L. braziliensis</i> | 223 | 1    | 223  |
| LbrM04_V2.1030 | <i>L. braziliensis</i> | 43  | 145  | 187  |
| LbrM04_V2.1030 | <i>L. braziliensis</i> | 77  | 205  | 281  |
| LbrM04_V2.1050 | <i>L. braziliensis</i> | 68  | 270  | 337  |
| LbrM04_V2.1060 | <i>L. braziliensis</i> | 68  | 288  | 355  |
| LbrM04_V2.1070 | <i>L. braziliensis</i> | 291 | 179  | 469  |

|                |                        |      |      |      |
|----------------|------------------------|------|------|------|
| LbrM04_V2.1090 | <i>L. braziliensis</i> | 149  | 1    | 149  |
| LbrM04_V2.1090 | <i>L. braziliensis</i> | 41   | 477  | 517  |
| LbrM04_V2.1090 | <i>L. braziliensis</i> | 42   | 617  | 658  |
| LbrM04_V2.1090 | <i>L. braziliensis</i> | 82   | 713  | 794  |
| LbrM04_V2.1100 | <i>L. braziliensis</i> | 601  | 1    | 601  |
| LbrM04_V2.1100 | <i>L. braziliensis</i> | 435  | 608  | 1042 |
| LbrM04_V2.1100 | <i>L. braziliensis</i> | 211  | 1085 | 1295 |
| LbrM04_V2.1130 | <i>L. braziliensis</i> | 157  | 40   | 196  |
| LbrM04_V2.1130 | <i>L. braziliensis</i> | 73   | 215  | 287  |
| LbrM04_V2.1130 | <i>L. braziliensis</i> | 337  | 331  | 667  |
| LbrM04_V2.1140 | <i>L. braziliensis</i> | 77   | 1    | 77   |
| LbrM04_V2.1150 | <i>L. braziliensis</i> | 303  | 1    | 303  |
| LbrM04_V2.1160 | <i>L. braziliensis</i> | 47   | 122  | 168  |
| LbrM04_V2.1190 | <i>L. braziliensis</i> | 94   | 1    | 94   |
| LbrM04_V2.1190 | <i>L. braziliensis</i> | 46   | 270  | 315  |
| LbrM04_V2.1200 | <i>L. braziliensis</i> | 121  | 1241 | 1361 |
| LbrM04_V2.1200 | <i>L. braziliensis</i> | 376  | 1369 | 1744 |
| LbrM04_V2.1200 | <i>L. braziliensis</i> | 51   | 1759 | 1809 |
| LbrM04_V2.1200 | <i>L. braziliensis</i> | 120  | 1845 | 1964 |
| LbrM04_V2.1200 | <i>L. braziliensis</i> | 251  | 1973 | 2223 |
| LbrM04_V2.1200 | <i>L. braziliensis</i> | 83   | 2250 | 2332 |
| LbrM04_V2.1230 | <i>L. braziliensis</i> | 43   | 326  | 368  |
| LbrM04_V2.1240 | <i>L. braziliensis</i> | 49   | 1    | 49   |
| LbrM04_V2.1240 | <i>L. braziliensis</i> | 372  | 112  | 483  |
| LbrM04_V2.1240 | <i>L. braziliensis</i> | 52   | 982  | 1033 |
| LbrM04_V2.1260 | <i>L. braziliensis</i> | 67   | 76   | 142  |
| LbrM04_V2.1260 | <i>L. braziliensis</i> | 107  | 193  | 299  |
| LbrM04_V2.1260 | <i>L. braziliensis</i> | 107  | 193  | 299  |
| LbrM04_V2.1270 | <i>L. braziliensis</i> | 141  | 41   | 181  |
| LbrM04_V2.1280 | <i>L. braziliensis</i> | 128  | 212  | 339  |
| LbrM04_V2.1290 | <i>L. braziliensis</i> | 46   | 1    | 46   |
| LbrM04_V2.1290 | <i>L. braziliensis</i> | 1148 | 124  | 1271 |
| LbrM04_V2.1300 | <i>L. braziliensis</i> | 164  | 1    | 164  |
| LbrM04_V2.1320 | <i>L. braziliensis</i> | 158  | 103  | 260  |
| LbrM04_V2.1330 | <i>L. braziliensis</i> | 69   | 41   | 109  |
| LbrM04_V2.1340 | <i>L. braziliensis</i> | 158  | 40   | 197  |
| LbrM05_V2.0010 | <i>L. braziliensis</i> | 122  | 1    | 122  |
| LbrM05_V2.0010 | <i>L. braziliensis</i> | 41   | 145  | 185  |
| LbrM05_V2.0010 | <i>L. braziliensis</i> | 198  | 226  | 423  |
| LbrM05_V2.0010 | <i>L. braziliensis</i> | 67   | 431  | 497  |
| LbrM05_V2.0010 | <i>L. braziliensis</i> | 113  | 511  | 623  |
| LbrM05_V2.0010 | <i>L. braziliensis</i> | 161  | 680  | 840  |
| LbrM05_V2.0040 | <i>L. braziliensis</i> | 98   | 1    | 98   |
| LbrM05_V2.0040 | <i>L. braziliensis</i> | 261  | 106  | 366  |
| LbrM05_V2.0040 | <i>L. braziliensis</i> | 92   | 382  | 473  |
| LbrM05_V2.0040 | <i>L. braziliensis</i> | 45   | 485  | 529  |
| LbrM05_V2.0050 | <i>L. braziliensis</i> | 113  | 45   | 157  |

|                |                        |     |      |      |
|----------------|------------------------|-----|------|------|
| LbrM05_V2.0050 | <i>L. braziliensis</i> | 78  | 194  | 271  |
| LbrM05_V2.0050 | <i>L. braziliensis</i> | 65  | 368  | 432  |
| LbrM05_V2.0050 | <i>L. braziliensis</i> | 44  | 623  | 666  |
| LbrM05_V2.0050 | <i>L. braziliensis</i> | 51  | 770  | 820  |
| LbrM05_V2.0060 | <i>L. braziliensis</i> | 155 | 621  | 775  |
| LbrM05_V2.0080 | <i>L. braziliensis</i> | 112 | 1    | 112  |
| LbrM05_V2.0080 | <i>L. braziliensis</i> | 44  | 159  | 202  |
| LbrM05_V2.0080 | <i>L. braziliensis</i> | 44  | 159  | 202  |
| LbrM05_V2.0100 | <i>L. braziliensis</i> | 44  | 146  | 189  |
| LbrM05_V2.0100 | <i>L. braziliensis</i> | 53  | 226  | 278  |
| LbrM05_V2.0100 | <i>L. braziliensis</i> | 53  | 226  | 278  |
| LbrM05_V2.0130 | <i>L. braziliensis</i> | 50  | 177  | 226  |
| LbrM05_V2.0130 | <i>L. braziliensis</i> | 99  | 334  | 432  |
| LbrM05_V2.0130 | <i>L. braziliensis</i> | 99  | 334  | 432  |
| LbrM05_V2.0140 | <i>L. braziliensis</i> | 85  | 1    | 85   |
| LbrM05_V2.0140 | <i>L. braziliensis</i> | 77  | 613  | 689  |
| LbrM05_V2.0150 | <i>L. braziliensis</i> | 50  | 393  | 442  |
| LbrM05_V2.0160 | <i>L. braziliensis</i> | 194 | 1    | 194  |
| LbrM05_V2.0160 | <i>L. braziliensis</i> | 62  | 197  | 258  |
| LbrM05_V2.0160 | <i>L. braziliensis</i> | 254 | 293  | 546  |
| LbrM05_V2.0170 | <i>L. braziliensis</i> | 54  | 1    | 54   |
| LbrM05_V2.0170 | <i>L. braziliensis</i> | 672 | 77   | 748  |
| LbrM05_V2.0180 | <i>L. braziliensis</i> | 62  | 115  | 176  |
| LbrM05_V2.0190 | <i>L. braziliensis</i> | 44  | 1    | 44   |
| LbrM05_V2.0190 | <i>L. braziliensis</i> | 233 | 117  | 349  |
| LbrM05_V2.0200 | <i>L. braziliensis</i> | 48  | 1    | 48   |
| LbrM05_V2.0200 | <i>L. braziliensis</i> | 127 | 254  | 380  |
| LbrM05_V2.0200 | <i>L. braziliensis</i> | 82  | 591  | 672  |
| LbrM05_V2.0200 | <i>L. braziliensis</i> | 114 | 675  | 788  |
| LbrM05_V2.0210 | <i>L. braziliensis</i> | 88  | 28   | 115  |
| LbrM05_V2.0210 | <i>L. braziliensis</i> | 84  | 172  | 255  |
| LbrM05_V2.0210 | <i>L. braziliensis</i> | 42  | 996  | 1037 |
| LbrM05_V2.0210 | <i>L. braziliensis</i> | 56  | 1165 | 1220 |
| LbrM05_V2.0210 | <i>L. braziliensis</i> | 183 | 1290 | 1472 |
| LbrM05_V2.0220 | <i>L. braziliensis</i> | 47  | 122  | 168  |
| LbrM05_V2.0220 | <i>L. braziliensis</i> | 85  | 330  | 414  |
| LbrM05_V2.0220 | <i>L. braziliensis</i> | 61  | 504  | 564  |
| LbrM05_V2.0240 | <i>L. braziliensis</i> | 45  | 85   | 129  |
| LbrM05_V2.0250 | <i>L. braziliensis</i> | 52  | 28   | 79   |
| LbrM05_V2.0250 | <i>L. braziliensis</i> | 81  | 237  | 317  |
| LbrM05_V2.0260 | <i>L. braziliensis</i> | 49  | 1    | 49   |
| LbrM05_V2.0260 | <i>L. braziliensis</i> | 111 | 212  | 322  |
| LbrM05_V2.0260 | <i>L. braziliensis</i> | 111 | 212  | 322  |
| LbrM05_V2.0290 | <i>L. braziliensis</i> | 101 | 1    | 101  |
| LbrM05_V2.0300 | <i>L. braziliensis</i> | 103 | 1    | 103  |
| LbrM05_V2.0300 | <i>L. braziliensis</i> | 63  | 317  | 379  |
| LbrM05_V2.0300 | <i>L. braziliensis</i> | 54  | 544  | 597  |

|                |                        |      |      |      |
|----------------|------------------------|------|------|------|
| LbrM05_V2.0310 | <i>L. braziliensis</i> | 60   | 1    | 60   |
| LbrM05_V2.0320 | <i>L. braziliensis</i> | 95   | 378  | 472  |
| LbrM05_V2.0320 | <i>L. braziliensis</i> | 40   | 811  | 850  |
| LbrM05_V2.0320 | <i>L. braziliensis</i> | 40   | 811  | 850  |
| LbrM05_V2.0330 | <i>L. braziliensis</i> | 107  | 1    | 107  |
| LbrM05_V2.0330 | <i>L. braziliensis</i> | 49   | 138  | 186  |
| LbrM05_V2.0340 | <i>L. braziliensis</i> | 130  | 1    | 130  |
| LbrM05_V2.0340 | <i>L. braziliensis</i> | 103  | 138  | 240  |
| LbrM05_V2.0340 | <i>L. braziliensis</i> | 476  | 398  | 873  |
| LbrM05_V2.0360 | <i>L. braziliensis</i> | 66   | 179  | 244  |
| LbrM05_V2.0360 | <i>L. braziliensis</i> | 45   | 261  | 305  |
| LbrM05_V2.0360 | <i>L. braziliensis</i> | 152  | 478  | 629  |
| LbrM05_V2.0370 | <i>L. braziliensis</i> | 56   | 73   | 128  |
| LbrM05_V2.0380 | <i>L. braziliensis</i> | 624  | 1    | 624  |
| LbrM05_V2.0380 | <i>L. braziliensis</i> | 216  | 640  | 855  |
| LbrM05_V2.0390 | <i>L. braziliensis</i> | 1903 | 1    | 1903 |
| LbrM05_V2.0400 | <i>L. braziliensis</i> | 100  | 1    | 100  |
| LbrM05_V2.0400 | <i>L. braziliensis</i> | 77   | 320  | 396  |
| LbrM05_V2.0410 | <i>L. braziliensis</i> | 318  | 177  | 494  |
| LbrM05_V2.0410 | <i>L. braziliensis</i> | 248  | 693  | 940  |
| LbrM05_V2.0410 | <i>L. braziliensis</i> | 47   | 970  | 1016 |
| LbrM05_V2.0420 | <i>L. braziliensis</i> | 50   | 109  | 158  |
| LbrM05_V2.0420 | <i>L. braziliensis</i> | 42   | 221  | 262  |
| LbrM05_V2.0420 | <i>L. braziliensis</i> | 95   | 331  | 425  |
| LbrM05_V2.0420 | <i>L. braziliensis</i> | 57   | 459  | 515  |
| LbrM05_V2.0440 | <i>L. braziliensis</i> | 53   | 42   | 94   |
| LbrM05_V2.0450 | <i>L. braziliensis</i> | 78   | 82   | 159  |
| LbrM05_V2.0450 | <i>L. braziliensis</i> | 44   | 437  | 480  |
| LbrM05_V2.0450 | <i>L. braziliensis</i> | 84   | 716  | 799  |
| LbrM05_V2.0470 | <i>L. braziliensis</i> | 58   | 1    | 58   |
| LbrM05_V2.0470 | <i>L. braziliensis</i> | 54   | 141  | 194  |
| LbrM05_V2.0470 | <i>L. braziliensis</i> | 165  | 476  | 640  |
| LbrM05_V2.0480 | <i>L. braziliensis</i> | 154  | 44   | 197  |
| LbrM05_V2.0490 | <i>L. braziliensis</i> | 93   | 211  | 303  |
| LbrM05_V2.0540 | <i>L. braziliensis</i> | 207  | 1    | 207  |
| LbrM05_V2.0540 | <i>L. braziliensis</i> | 57   | 301  | 357  |
| LbrM05_V2.0540 | <i>L. braziliensis</i> | 259  | 372  | 630  |
| LbrM05_V2.0540 | <i>L. braziliensis</i> | 77   | 657  | 733  |
| LbrM05_V2.0540 | <i>L. braziliensis</i> | 44   | 770  | 813  |
| LbrM05_V2.0540 | <i>L. braziliensis</i> | 62   | 854  | 915  |
| LbrM05_V2.0540 | <i>L. braziliensis</i> | 133  | 944  | 1076 |
| LbrM05_V2.0540 | <i>L. braziliensis</i> | 134  | 1080 | 1213 |
| LbrM05_V2.0540 | <i>L. braziliensis</i> | 203  | 1226 | 1428 |
| LbrM05_V2.0540 | <i>L. braziliensis</i> | 125  | 1451 | 1575 |
| LbrM05_V2.0540 | <i>L. braziliensis</i> | 169  | 1649 | 1817 |
| LbrM05_V2.0540 | <i>L. braziliensis</i> | 68   | 1945 | 2012 |
| LbrM05_V2.0550 | <i>L. braziliensis</i> | 85   | 1    | 85   |

|                |                        |      |      |      |
|----------------|------------------------|------|------|------|
| LbrM05_V2.0550 | <i>L. braziliensis</i> | 45   | 134  | 178  |
| LbrM05_V2.0550 | <i>L. braziliensis</i> | 45   | 134  | 178  |
| LbrM05_V2.0570 | <i>L. braziliensis</i> | 52   | 66   | 117  |
| LbrM05_V2.0570 | <i>L. braziliensis</i> | 126  | 205  | 330  |
| LbrM05_V2.0590 | <i>L. braziliensis</i> | 42   | 1    | 42   |
| LbrM05_V2.0590 | <i>L. braziliensis</i> | 243  | 79   | 321  |
| LbrM05_V2.0590 | <i>L. braziliensis</i> | 155  | 341  | 495  |
| LbrM05_V2.0590 | <i>L. braziliensis</i> | 231  | 534  | 764  |
| LbrM05_V2.0600 | <i>L. braziliensis</i> | 96   | 1    | 96   |
| LbrM05_V2.0600 | <i>L. braziliensis</i> | 54   | 149  | 202  |
| LbrM05_V2.0600 | <i>L. braziliensis</i> | 54   | 149  | 202  |
| LbrM05_V2.0610 | <i>L. braziliensis</i> | 55   | 39   | 93   |
| LbrM05_V2.0620 | <i>L. braziliensis</i> | 90   | 1    | 90   |
| LbrM05_V2.0630 | <i>L. braziliensis</i> | 56   | 52   | 107  |
| LbrM05_V2.0630 | <i>L. braziliensis</i> | 60   | 193  | 252  |
| LbrM05_V2.0640 | <i>L. braziliensis</i> | 114  | 1    | 114  |
| LbrM05_V2.0640 | <i>L. braziliensis</i> | 71   | 312  | 382  |
| LbrM05_V2.0640 | <i>L. braziliensis</i> | 242  | 537  | 778  |
| LbrM05_V2.0650 | <i>L. braziliensis</i> | 47   | 1    | 47   |
| LbrM05_V2.0660 | <i>L. braziliensis</i> | 576  | 1    | 576  |
| LbrM05_V2.0660 | <i>L. braziliensis</i> | 767  | 583  | 1349 |
| LbrM05_V2.0660 | <i>L. braziliensis</i> | 64   | 1385 | 1448 |
| LbrM05_V2.0660 | <i>L. braziliensis</i> | 79   | 1454 | 1532 |
| LbrM05_V2.0660 | <i>L. braziliensis</i> | 661  | 1556 | 2216 |
| LbrM05_V2.0660 | <i>L. braziliensis</i> | 188  | 2241 | 2428 |
| LbrM05_V2.0670 | <i>L. braziliensis</i> | 48   | 1    | 48   |
| LbrM05_V2.0680 | <i>L. braziliensis</i> | 42   | 47   | 88   |
| LbrM05_V2.0680 | <i>L. braziliensis</i> | 62   | 181  | 242  |
| LbrM05_V2.0680 | <i>L. braziliensis</i> | 217  | 254  | 470  |
| LbrM05_V2.0680 | <i>L. braziliensis</i> | 359  | 516  | 874  |
| LbrM05_V2.0680 | <i>L. braziliensis</i> | 41   | 942  | 982  |
| LbrM05_V2.0680 | <i>L. braziliensis</i> | 45   | 1079 | 1123 |
| LbrM05_V2.0680 | <i>L. braziliensis</i> | 110  | 1153 | 1262 |
| LbrM05_V2.0680 | <i>L. braziliensis</i> | 71   | 1336 | 1406 |
| LbrM05_V2.0680 | <i>L. braziliensis</i> | 345  | 1474 | 1818 |
| LbrM05_V2.0680 | <i>L. braziliensis</i> | 100  | 1837 | 1936 |
| LbrM05_V2.0680 | <i>L. braziliensis</i> | 56   | 1968 | 2023 |
| LbrM05_V2.0680 | <i>L. braziliensis</i> | 66   | 2029 | 2094 |
| LbrM05_V2.0680 | <i>L. braziliensis</i> | 264  | 2122 | 2385 |
| LbrM05_V2.0680 | <i>L. braziliensis</i> | 139  | 2401 | 2539 |
| LbrM05_V2.0680 | <i>L. braziliensis</i> | 86   | 2562 | 2647 |
| LbrM05_V2.0680 | <i>L. braziliensis</i> | 215  | 2658 | 2872 |
| LbrM05_V2.0690 | <i>L. braziliensis</i> | 1252 | 1    | 1252 |
| LbrM05_V2.0690 | <i>L. braziliensis</i> | 165  | 1268 | 1432 |
| LbrM05_V2.0690 | <i>L. braziliensis</i> | 42   | 1443 | 1484 |
| LbrM05_V2.0690 | <i>L. braziliensis</i> | 105  | 1623 | 1727 |
| LbrM05_V2.0700 | <i>L. braziliensis</i> | 144  | 1    | 144  |

|                |                        |      |      |      |
|----------------|------------------------|------|------|------|
| LbrM05_V2.0700 | <i>L. braziliensis</i> | 101  | 154  | 254  |
| LbrM05_V2.0700 | <i>L. braziliensis</i> | 62   | 268  | 329  |
| LbrM05_V2.0700 | <i>L. braziliensis</i> | 254  | 337  | 590  |
| LbrM05_V2.0700 | <i>L. braziliensis</i> | 73   | 716  | 788  |
| LbrM05_V2.0700 | <i>L. braziliensis</i> | 389  | 842  | 1230 |
| LbrM05_V2.0710 | <i>L. braziliensis</i> | 536  | 81   | 616  |
| LbrM05_V2.0710 | <i>L. braziliensis</i> | 54   | 628  | 681  |
| LbrM05_V2.0720 | <i>L. braziliensis</i> | 179  | 154  | 332  |
| LbrM05_V2.0730 | <i>L. braziliensis</i> | 57   | 48   | 104  |
| LbrM05_V2.0730 | <i>L. braziliensis</i> | 138  | 294  | 431  |
| LbrM05_V2.0740 | <i>L. braziliensis</i> | 147  | 32   | 178  |
| LbrM05_V2.0740 | <i>L. braziliensis</i> | 144  | 198  | 341  |
| LbrM05_V2.0740 | <i>L. braziliensis</i> | 111  | 346  | 456  |
| LbrM05_V2.0740 | <i>L. braziliensis</i> | 61   | 459  | 519  |
| LbrM05_V2.0740 | <i>L. braziliensis</i> | 99   | 527  | 625  |
| LbrM05_V2.0740 | <i>L. braziliensis</i> | 254  | 794  | 1047 |
| LbrM05_V2.0740 | <i>L. braziliensis</i> | 45   | 1211 | 1255 |
| LbrM05_V2.0740 | <i>L. braziliensis</i> | 128  | 1295 | 1422 |
| LbrM05_V2.0740 | <i>L. braziliensis</i> | 133  | 1487 | 1619 |
| LbrM05_V2.0750 | <i>L. braziliensis</i> | 207  | 102  | 308  |
| LbrM05_V2.0750 | <i>L. braziliensis</i> | 633  | 310  | 942  |
| LbrM05_V2.0750 | <i>L. braziliensis</i> | 43   | 946  | 988  |
| LbrM05_V2.0750 | <i>L. braziliensis</i> | 448  | 1012 | 1459 |
| LbrM05_V2.0770 | <i>L. braziliensis</i> | 61   | 1    | 61   |
| LbrM05_V2.0770 | <i>L. braziliensis</i> | 113  | 63   | 175  |
| LbrM05_V2.0770 | <i>L. braziliensis</i> | 44   | 187  | 230  |
| LbrM05_V2.0770 | <i>L. braziliensis</i> | 45   | 251  | 295  |
| LbrM05_V2.0780 | <i>L. braziliensis</i> | 74   | 174  | 247  |
| LbrM05_V2.0790 | <i>L. braziliensis</i> | 53   | 1    | 53   |
| LbrM05_V2.0790 | <i>L. braziliensis</i> | 49   | 197  | 245  |
| LbrM05_V2.0800 | <i>L. braziliensis</i> | 48   | 259  | 306  |
| LbrM05_V2.0810 | <i>L. braziliensis</i> | 715  | 49   | 763  |
| LbrM05_V2.0810 | <i>L. braziliensis</i> | 701  | 796  | 1496 |
| LbrM05_V2.0820 | <i>L. braziliensis</i> | 124  | 1    | 124  |
| LbrM05_V2.0820 | <i>L. braziliensis</i> | 340  | 161  | 500  |
| LbrM05_V2.0820 | <i>L. braziliensis</i> | 148  | 520  | 667  |
| LbrM05_V2.0830 | <i>L. braziliensis</i> | 94   | 62   | 155  |
| LbrM05_V2.0840 | <i>L. braziliensis</i> | 65   | 1    | 65   |
| LbrM05_V2.0840 | <i>L. braziliensis</i> | 134  | 172  | 305  |
| LbrM05_V2.0840 | <i>L. braziliensis</i> | 73   | 386  | 458  |
| LbrM05_V2.0840 | <i>L. braziliensis</i> | 66   | 550  | 615  |
| LbrM05_V2.0840 | <i>L. braziliensis</i> | 1033 | 631  | 1663 |
| LbrM05_V2.0840 | <i>L. braziliensis</i> | 114  | 1666 | 1779 |
| LbrM05_V2.0840 | <i>L. braziliensis</i> | 45   | 1781 | 1825 |
| LbrM05_V2.0850 | <i>L. braziliensis</i> | 55   | 1    | 55   |
| LbrM05_V2.0850 | <i>L. braziliensis</i> | 50   | 155  | 204  |
| LbrM05_V2.0850 | <i>L. braziliensis</i> | 50   | 155  | 204  |

|                |                        |     |      |      |
|----------------|------------------------|-----|------|------|
| LbrM05_V2.0860 | <i>L. braziliensis</i> | 67  | 245  | 311  |
| LbrM05_V2.0860 | <i>L. braziliensis</i> | 193 | 614  | 806  |
| LbrM05_V2.0860 | <i>L. braziliensis</i> | 64  | 845  | 908  |
| LbrM05_V2.0860 | <i>L. braziliensis</i> | 51  | 1057 | 1107 |
| LbrM05_V2.0860 | <i>L. braziliensis</i> | 51  | 1269 | 1319 |
| LbrM05_V2.0860 | <i>L. braziliensis</i> | 64  | 1530 | 1593 |
| LbrM05_V2.0880 | <i>L. braziliensis</i> | 60  | 192  | 251  |
| LbrM05_V2.0880 | <i>L. braziliensis</i> | 65  | 286  | 350  |
| LbrM05_V2.0880 | <i>L. braziliensis</i> | 74  | 407  | 480  |
| LbrM05_V2.0880 | <i>L. braziliensis</i> | 57  | 664  | 720  |
| LbrM05_V2.0890 | <i>L. braziliensis</i> | 459 | 1    | 459  |
| LbrM05_V2.0890 | <i>L. braziliensis</i> | 166 | 480  | 645  |
| LbrM05_V2.0890 | <i>L. braziliensis</i> | 57  | 810  | 866  |
| LbrM05_V2.0890 | <i>L. braziliensis</i> | 75  | 913  | 987  |
| LbrM05_V2.0890 | <i>L. braziliensis</i> | 348 | 989  | 1336 |
| LbrM05_V2.0890 | <i>L. braziliensis</i> | 64  | 1352 | 1415 |
| LbrM05_V2.0900 | <i>L. braziliensis</i> | 121 | 1    | 121  |
| LbrM05_V2.0900 | <i>L. braziliensis</i> | 82  | 145  | 226  |
| LbrM05_V2.0900 | <i>L. braziliensis</i> | 67  | 381  | 447  |
| LbrM05_V2.0900 | <i>L. braziliensis</i> | 50  | 476  | 525  |
| LbrM05_V2.0900 | <i>L. braziliensis</i> | 185 | 706  | 890  |
| LbrM05_V2.0900 | <i>L. braziliensis</i> | 46  | 898  | 943  |
| LbrM05_V2.0910 | <i>L. braziliensis</i> | 240 | 167  | 406  |
| LbrM05_V2.0920 | <i>L. braziliensis</i> | 522 | 69   | 590  |
| LbrM05_V2.0920 | <i>L. braziliensis</i> | 187 | 630  | 816  |
| LbrM05_V2.0920 | <i>L. braziliensis</i> | 252 | 847  | 1098 |
| LbrM05_V2.0920 | <i>L. braziliensis</i> | 67  | 1132 | 1198 |
| LbrM05_V2.0930 | <i>L. braziliensis</i> | 45  | 77   | 121  |
| LbrM05_V2.0930 | <i>L. braziliensis</i> | 44  | 239  | 282  |
| LbrM05_V2.0930 | <i>L. braziliensis</i> | 51  | 325  | 375  |
| LbrM05_V2.0930 | <i>L. braziliensis</i> | 40  | 399  | 438  |
| LbrM05_V2.1000 | <i>L. braziliensis</i> | 57  | 1    | 57   |
| LbrM05_V2.1010 | <i>L. braziliensis</i> | 138 | 484  | 621  |
| LbrM05_V2.1020 | <i>L. braziliensis</i> | 69  | 110  | 178  |
| LbrM05_V2.1020 | <i>L. braziliensis</i> | 44  | 263  | 306  |
| LbrM05_V2.1020 | <i>L. braziliensis</i> | 55  | 377  | 431  |
| LbrM05_V2.1020 | <i>L. braziliensis</i> | 71  | 501  | 571  |
| LbrM05_V2.1020 | <i>L. braziliensis</i> | 48  | 744  | 791  |
| LbrM05_V2.1030 | <i>L. braziliensis</i> | 47  | 28   | 74   |
| LbrM05_V2.1040 | <i>L. braziliensis</i> | 58  | 1    | 58   |
| LbrM05_V2.1050 | <i>L. braziliensis</i> | 69  | 72   | 140  |
| LbrM05_V2.1050 | <i>L. braziliensis</i> | 43  | 210  | 252  |
| LbrM05_V2.1050 | <i>L. braziliensis</i> | 43  | 210  | 252  |
| LbrM05_V2.1060 | <i>L. braziliensis</i> | 40  | 145  | 184  |
| LbrM05_V2.1060 | <i>L. braziliensis</i> | 68  | 411  | 478  |
| LbrM05_V2.1060 | <i>L. braziliensis</i> | 68  | 411  | 478  |
| LbrM05_V2.1070 | <i>L. braziliensis</i> | 80  | 166  | 245  |



|                |                        |     |      |      |
|----------------|------------------------|-----|------|------|
| LbrM05_V2.1080 | <i>L. braziliensis</i> | 42  | 20   | 61   |
| LbrM05_V2.1080 | <i>L. braziliensis</i> | 61  | 141  | 201  |
| LbrM05_V2.1080 | <i>L. braziliensis</i> | 48  | 535  | 582  |
| LbrM05_V2.1080 | <i>L. braziliensis</i> | 99  | 627  | 725  |
| LbrM05_V2.1090 | <i>L. braziliensis</i> | 115 | 197  | 311  |
| LbrM05_V2.1090 | <i>L. braziliensis</i> | 45  | 320  | 364  |
| LbrM05_V2.1090 | <i>L. braziliensis</i> | 115 | 398  | 512  |
| LbrM05_V2.1110 | <i>L. braziliensis</i> | 45  | 1    | 45   |
| LbrM05_V2.1120 | <i>L. braziliensis</i> | 132 | 1    | 132  |
| LbrM05_V2.1120 | <i>L. braziliensis</i> | 70  | 238  | 307  |
| LbrM05_V2.1120 | <i>L. braziliensis</i> | 74  | 431  | 504  |
| LbrM05_V2.1120 | <i>L. braziliensis</i> | 213 | 703  | 915  |
| LbrM05_V2.1120 | <i>L. braziliensis</i> | 87  | 1059 | 1145 |
| LbrM05_V2.1130 | <i>L. braziliensis</i> | 91  | 1    | 91   |
| LbrM05_V2.1150 | <i>L. braziliensis</i> | 49  | 44   | 92   |
| LbrM05_V2.1150 | <i>L. braziliensis</i> | 41  | 162  | 202  |
| LbrM05_V2.1150 | <i>L. braziliensis</i> | 71  | 218  | 288  |
| LbrM05_V2.1150 | <i>L. braziliensis</i> | 65  | 385  | 449  |
| LbrM05_V2.1150 | <i>L. braziliensis</i> | 69  | 479  | 547  |
| LbrM05_V2.1150 | <i>L. braziliensis</i> | 179 | 564  | 742  |
| LbrM05_V2.1150 | <i>L. braziliensis</i> | 96  | 775  | 870  |
| LbrM05_V2.1170 | <i>L. braziliensis</i> | 96  | 1    | 96   |
| LbrM05_V2.1170 | <i>L. braziliensis</i> | 45  | 100  | 144  |
| LbrM05_V2.1170 | <i>L. braziliensis</i> | 51  | 311  | 361  |
| LbrM05_V2.1170 | <i>L. braziliensis</i> | 133 | 390  | 522  |
| LbrM05_V2.1180 | <i>L. braziliensis</i> | 65  | 1    | 65   |
| LbrM05_V2.1180 | <i>L. braziliensis</i> | 48  | 115  | 162  |
| LbrM05_V2.1180 | <i>L. braziliensis</i> | 95  | 182  | 276  |
| LbrM05_V2.1180 | <i>L. braziliensis</i> | 62  | 343  | 404  |
| LbrM05_V2.1180 | <i>L. braziliensis</i> | 58  | 455  | 512  |
| LbrM05_V2.1180 | <i>L. braziliensis</i> | 114 | 547  | 660  |
| LbrM05_V2.1180 | <i>L. braziliensis</i> | 59  | 849  | 907  |
| LbrM05_V2.1180 | <i>L. braziliensis</i> | 59  | 979  | 1037 |
| LbrM05_V2.1180 | <i>L. braziliensis</i> | 78  | 1230 | 1307 |
| LbrM05_V2.1180 | <i>L. braziliensis</i> | 229 | 1325 | 1553 |
| LbrM05_V2.1180 | <i>L. braziliensis</i> | 337 | 1645 | 1981 |
| LbrM05_V2.1190 | <i>L. braziliensis</i> | 57  | 1    | 57   |
| LbrM05_V2.1190 | <i>L. braziliensis</i> | 48  | 90   | 137  |
| LbrM05_V2.1190 | <i>L. braziliensis</i> | 48  | 90   | 137  |
| LbrM05_V2.1200 | <i>L. braziliensis</i> | 73  | 14   | 86   |
| LbrM05_V2.1210 | <i>L. braziliensis</i> | 48  | 215  | 262  |
| LbrM05_V2.1230 | <i>L. braziliensis</i> | 403 | 1    | 403  |
| LbrM05_V2.1240 | <i>L. braziliensis</i> | 172 | 97   | 268  |
| LbrM05_V2.1240 | <i>L. braziliensis</i> | 115 | 448  | 562  |
| LbrM05_V2.1240 | <i>L. braziliensis</i> | 86  | 577  | 662  |
| LbrM05_V2.1240 | <i>L. braziliensis</i> | 169 | 676  | 844  |
| LbrM05_V2.1240 | <i>L. braziliensis</i> | 58  | 1349 | 1406 |

|                |                        |     |      |      |
|----------------|------------------------|-----|------|------|
| LbrM06_V2.0010 | <i>L. braziliensis</i> | 75  | 1    | 75   |
| LbrM06_V2.0030 | <i>L. braziliensis</i> | 79  | 48   | 126  |
| LbrM06_V2.0030 | <i>L. braziliensis</i> | 46  | 165  | 210  |
| LbrM06_V2.0050 | <i>L. braziliensis</i> | 155 | 1    | 155  |
| LbrM06_V2.0060 | <i>L. braziliensis</i> | 106 | 42   | 147  |
| LbrM06_V2.0060 | <i>L. braziliensis</i> | 120 | 215  | 334  |
| LbrM06_V2.0060 | <i>L. braziliensis</i> | 61  | 367  | 427  |
| LbrM06_V2.0080 | <i>L. braziliensis</i> | 80  | 1    | 80   |
| LbrM06_V2.0090 | <i>L. braziliensis</i> | 148 | 105  | 252  |
| LbrM06_V2.0090 | <i>L. braziliensis</i> | 45  | 254  | 298  |
| LbrM06_V2.0090 | <i>L. braziliensis</i> | 98  | 344  | 441  |
| LbrM06_V2.0110 | <i>L. braziliensis</i> | 46  | 145  | 190  |
| LbrM06_V2.0140 | <i>L. braziliensis</i> | 48  | 368  | 415  |
| LbrM06_V2.0150 | <i>L. braziliensis</i> | 41  | 54   | 94   |
| LbrM06_V2.0160 | <i>L. braziliensis</i> | 113 | 1    | 113  |
| LbrM06_V2.0160 | <i>L. braziliensis</i> | 68  | 373  | 440  |
| LbrM06_V2.0160 | <i>L. braziliensis</i> | 118 | 528  | 645  |
| LbrM06_V2.0170 | <i>L. braziliensis</i> | 73  | 57   | 129  |
| LbrM06_V2.0170 | <i>L. braziliensis</i> | 59  | 232  | 290  |
| LbrM06_V2.0170 | <i>L. braziliensis</i> | 65  | 330  | 394  |
| LbrM06_V2.0170 | <i>L. braziliensis</i> | 151 | 451  | 601  |
| LbrM06_V2.0180 | <i>L. braziliensis</i> | 73  | 1    | 73   |
| LbrM06_V2.0180 | <i>L. braziliensis</i> | 253 | 79   | 331  |
| LbrM06_V2.0190 | <i>L. braziliensis</i> | 60  | 31   | 90   |
| LbrM06_V2.0200 | <i>L. braziliensis</i> | 74  | 212  | 285  |
| LbrM06_V2.0220 | <i>L. braziliensis</i> | 92  | 48   | 139  |
| LbrM06_V2.0220 | <i>L. braziliensis</i> | 43  | 359  | 401  |
| LbrM06_V2.0220 | <i>L. braziliensis</i> | 50  | 696  | 745  |
| LbrM06_V2.0220 | <i>L. braziliensis</i> | 42  | 795  | 836  |
| LbrM06_V2.0220 | <i>L. braziliensis</i> | 87  | 855  | 941  |
| LbrM06_V2.0230 | <i>L. braziliensis</i> | 144 | 113  | 256  |
| LbrM06_V2.0240 | <i>L. braziliensis</i> | 69  | 1061 | 1129 |
| LbrM06_V2.0240 | <i>L. braziliensis</i> | 284 | 1179 | 1462 |
| LbrM06_V2.0250 | <i>L. braziliensis</i> | 67  | 102  | 168  |
| LbrM06_V2.0260 | <i>L. braziliensis</i> | 68  | 75   | 142  |
| LbrM06_V2.0260 | <i>L. braziliensis</i> | 47  | 347  | 393  |
| LbrM06_V2.0260 | <i>L. braziliensis</i> | 94  | 529  | 622  |
| LbrM06_V2.0260 | <i>L. braziliensis</i> | 83  | 745  | 827  |
| LbrM06_V2.0300 | <i>L. braziliensis</i> | 417 | 1    | 417  |
| LbrM06_V2.0300 | <i>L. braziliensis</i> | 85  | 431  | 515  |
| LbrM06_V2.0300 | <i>L. braziliensis</i> | 43  | 600  | 642  |
| LbrM06_V2.0300 | <i>L. braziliensis</i> | 198 | 672  | 869  |
| LbrM06_V2.0310 | <i>L. braziliensis</i> | 144 | 311  | 454  |
| LbrM06_V2.0310 | <i>L. braziliensis</i> | 250 | 793  | 1042 |
| LbrM06_V2.0310 | <i>L. braziliensis</i> | 44  | 1165 | 1208 |
| LbrM06_V2.0320 | <i>L. braziliensis</i> | 47  | 35   | 81   |
| LbrM06_V2.0320 | <i>L. braziliensis</i> | 50  | 856  | 905  |

|                |                        |     |     |      |
|----------------|------------------------|-----|-----|------|
| LbrM06_V2.0360 | <i>L. braziliensis</i> | 45  | 1   | 45   |
| LbrM06_V2.0360 | <i>L. braziliensis</i> | 47  | 299 | 345  |
| LbrM06_V2.0360 | <i>L. braziliensis</i> | 47  | 299 | 345  |
| LbrM06_V2.0370 | <i>L. braziliensis</i> | 61  | 371 | 431  |
| LbrM06_V2.0370 | <i>L. braziliensis</i> | 47  | 477 | 523  |
| LbrM06_V2.0370 | <i>L. braziliensis</i> | 47  | 477 | 523  |
| LbrM06_V2.0390 | <i>L. braziliensis</i> | 64  | 52  | 115  |
| LbrM06_V2.0390 | <i>L. braziliensis</i> | 119 | 132 | 250  |
| LbrM06_V2.0400 | <i>L. braziliensis</i> | 145 | 35  | 179  |
| LbrM06_V2.0410 | <i>L. braziliensis</i> | 64  | 52  | 115  |
| LbrM06_V2.0410 | <i>L. braziliensis</i> | 140 | 132 | 271  |
| LbrM06_V2.0420 | <i>L. braziliensis</i> | 140 | 37  | 176  |
| LbrM06_V2.0430 | <i>L. braziliensis</i> | 71  | 1   | 71   |
| LbrM06_V2.0430 | <i>L. braziliensis</i> | 424 | 143 | 566  |
| LbrM06_V2.0440 | <i>L. braziliensis</i> | 112 | 1   | 112  |
| LbrM06_V2.0440 | <i>L. braziliensis</i> | 53  | 163 | 215  |
| LbrM06_V2.0440 | <i>L. braziliensis</i> | 222 | 463 | 684  |
| LbrM06_V2.0450 | <i>L. braziliensis</i> | 82  | 34  | 115  |
| LbrM06_V2.0450 | <i>L. braziliensis</i> | 413 | 416 | 828  |
| LbrM06_V2.0450 | <i>L. braziliensis</i> | 91  | 868 | 958  |
| LbrM06_V2.0460 | <i>L. braziliensis</i> | 121 | 1   | 121  |
| LbrM06_V2.0460 | <i>L. braziliensis</i> | 49  | 182 | 230  |
| LbrM06_V2.0460 | <i>L. braziliensis</i> | 82  | 275 | 356  |
| LbrM06_V2.0460 | <i>L. braziliensis</i> | 82  | 395 | 476  |
| LbrM06_V2.0470 | <i>L. braziliensis</i> | 92  | 32  | 123  |
| LbrM06_V2.0470 | <i>L. braziliensis</i> | 57  | 130 | 186  |
| LbrM06_V2.0470 | <i>L. braziliensis</i> | 175 | 301 | 475  |
| LbrM06_V2.0470 | <i>L. braziliensis</i> | 345 | 499 | 843  |
| LbrM06_V2.0470 | <i>L. braziliensis</i> | 70  | 913 | 982  |
| LbrM06_V2.0480 | <i>L. braziliensis</i> | 47  | 1   | 47   |
| LbrM06_V2.0480 | <i>L. braziliensis</i> | 87  | 169 | 255  |
| LbrM06_V2.0480 | <i>L. braziliensis</i> | 253 | 300 | 552  |
| LbrM06_V2.0480 | <i>L. braziliensis</i> | 102 | 596 | 697  |
| LbrM06_V2.0480 | <i>L. braziliensis</i> | 58  | 785 | 842  |
| LbrM06_V2.0480 | <i>L. braziliensis</i> | 95  | 855 | 949  |
| LbrM06_V2.0480 | <i>L. braziliensis</i> | 96  | 994 | 1089 |
| LbrM06_V2.0500 | <i>L. braziliensis</i> | 147 | 1   | 147  |
| LbrM06_V2.0510 | <i>L. braziliensis</i> | 53  | 53  | 105  |
| LbrM06_V2.0510 | <i>L. braziliensis</i> | 60  | 120 | 179  |
| LbrM06_V2.0510 | <i>L. braziliensis</i> | 70  | 344 | 413  |
| LbrM06_V2.0510 | <i>L. braziliensis</i> | 67  | 445 | 511  |
| LbrM06_V2.0510 | <i>L. braziliensis</i> | 43  | 543 | 585  |
| LbrM06_V2.0520 | <i>L. braziliensis</i> | 55  | 168 | 222  |
| LbrM06_V2.0520 | <i>L. braziliensis</i> | 78  | 399 | 476  |
| LbrM06_V2.0520 | <i>L. braziliensis</i> | 66  | 611 | 676  |
| LbrM06_V2.0530 | <i>L. braziliensis</i> | 147 | 63  | 209  |
| LbrM06_V2.0530 | <i>L. braziliensis</i> | 148 | 218 | 365  |

|                |                        |     |      |      |
|----------------|------------------------|-----|------|------|
| LbrM06_V2.0530 | <i>L. braziliensis</i> | 42  | 386  | 427  |
| LbrM06_V2.0530 | <i>L. braziliensis</i> | 95  | 462  | 556  |
| LbrM06_V2.0530 | <i>L. braziliensis</i> | 161 | 702  | 862  |
| LbrM06_V2.0530 | <i>L. braziliensis</i> | 253 | 892  | 1144 |
| LbrM06_V2.0540 | <i>L. braziliensis</i> | 52  | 97   | 148  |
| LbrM06_V2.0550 | <i>L. braziliensis</i> | 64  | 14   | 77   |
| LbrM06_V2.0550 | <i>L. braziliensis</i> | 111 | 155  | 265  |
| LbrM06_V2.0550 | <i>L. braziliensis</i> | 85  | 500  | 584  |
| LbrM06_V2.0550 | <i>L. braziliensis</i> | 71  | 606  | 676  |
| LbrM06_V2.0550 | <i>L. braziliensis</i> | 101 | 694  | 794  |
| LbrM06_V2.0560 | <i>L. braziliensis</i> | 126 | 1    | 126  |
| LbrM06_V2.0560 | <i>L. braziliensis</i> | 71  | 219  | 289  |
| LbrM06_V2.0560 | <i>L. braziliensis</i> | 64  | 295  | 358  |
| LbrM06_V2.0560 | <i>L. braziliensis</i> | 55  | 371  | 425  |
| LbrM06_V2.0560 | <i>L. braziliensis</i> | 58  | 573  | 630  |
| LbrM06_V2.0560 | <i>L. braziliensis</i> | 61  | 753  | 813  |
| LbrM06_V2.0560 | <i>L. braziliensis</i> | 87  | 841  | 927  |
| LbrM06_V2.0560 | <i>L. braziliensis</i> | 41  | 1144 | 1184 |
| LbrM06_V2.0560 | <i>L. braziliensis</i> | 52  | 1188 | 1239 |
| LbrM06_V2.0560 | <i>L. braziliensis</i> | 46  | 1547 | 1592 |
| LbrM06_V2.0560 | <i>L. braziliensis</i> | 52  | 1651 | 1702 |
| LbrM06_V2.0580 | <i>L. braziliensis</i> | 69  | 1    | 69   |
| LbrM06_V2.0590 | <i>L. braziliensis</i> | 70  | 1    | 70   |
| LbrM06_V2.0600 | <i>L. braziliensis</i> | 73  | 82   | 154  |
| LbrM06_V2.0600 | <i>L. braziliensis</i> | 58  | 246  | 303  |
| LbrM06_V2.0600 | <i>L. braziliensis</i> | 47  | 444  | 490  |
| LbrM06_V2.0600 | <i>L. braziliensis</i> | 67  | 551  | 617  |
| LbrM06_V2.0600 | <i>L. braziliensis</i> | 229 | 634  | 862  |
| LbrM06_V2.0600 | <i>L. braziliensis</i> | 349 | 881  | 1229 |
| LbrM06_V2.0600 | <i>L. braziliensis</i> | 252 | 1245 | 1496 |
| LbrM06_V2.0610 | <i>L. braziliensis</i> | 59  | 165  | 223  |
| LbrM06_V2.0610 | <i>L. braziliensis</i> | 260 | 260  | 519  |
| LbrM06_V2.0610 | <i>L. braziliensis</i> | 73  | 593  | 665  |
| LbrM06_V2.0610 | <i>L. braziliensis</i> | 63  | 855  | 917  |
| LbrM06_V2.0610 | <i>L. braziliensis</i> | 156 | 946  | 1101 |
| LbrM06_V2.0610 | <i>L. braziliensis</i> | 220 | 1163 | 1382 |
| LbrM06_V2.0620 | <i>L. braziliensis</i> | 153 | 1    | 153  |
| LbrM06_V2.0640 | <i>L. braziliensis</i> | 186 | 1    | 186  |
| LbrM06_V2.0640 | <i>L. braziliensis</i> | 98  | 476  | 573  |
| LbrM06_V2.0640 | <i>L. braziliensis</i> | 146 | 651  | 796  |
| LbrM06_V2.0640 | <i>L. braziliensis</i> | 103 | 883  | 985  |
| LbrM06_V2.0640 | <i>L. braziliensis</i> | 121 | 1092 | 1212 |
| LbrM06_V2.0640 | <i>L. braziliensis</i> | 141 | 1250 | 1390 |
| LbrM06_V2.0640 | <i>L. braziliensis</i> | 147 | 1420 | 1566 |
| LbrM06_V2.0640 | <i>L. braziliensis</i> | 200 | 1587 | 1786 |
| LbrM06_V2.0640 | <i>L. braziliensis</i> | 372 | 1810 | 2181 |
| LbrM06_V2.0640 | <i>L. braziliensis</i> | 156 | 2186 | 2341 |

|                |                        |     |      |      |
|----------------|------------------------|-----|------|------|
| LbrM06_V2.0640 | <i>L. braziliensis</i> | 47  | 2375 | 2421 |
| LbrM06_V2.0640 | <i>L. braziliensis</i> | 110 | 2484 | 2593 |
| LbrM06_V2.0640 | <i>L. braziliensis</i> | 41  | 2755 | 2795 |
| LbrM06_V2.0640 | <i>L. braziliensis</i> | 126 | 2878 | 3003 |
| LbrM06_V2.0650 | <i>L. braziliensis</i> | 45  | 1    | 45   |
| LbrM06_V2.0650 | <i>L. braziliensis</i> | 50  | 339  | 388  |
| LbrM06_V2.0650 | <i>L. braziliensis</i> | 50  | 339  | 388  |
| LbrM06_V2.0660 | <i>L. braziliensis</i> | 365 | 1    | 365  |
| LbrM06_V2.0660 | <i>L. braziliensis</i> | 167 | 370  | 536  |
| LbrM06_V2.0660 | <i>L. braziliensis</i> | 69  | 539  | 607  |
| LbrM06_V2.0670 | <i>L. braziliensis</i> | 528 | 1    | 528  |
| LbrM06_V2.0670 | <i>L. braziliensis</i> | 508 | 538  | 1045 |
| LbrM06_V2.0670 | <i>L. braziliensis</i> | 78  | 1047 | 1124 |
| LbrM06_V2.0670 | <i>L. braziliensis</i> | 131 | 1142 | 1272 |
| LbrM06_V2.0680 | <i>L. braziliensis</i> | 44  | 56   | 99   |
| LbrM06_V2.0690 | <i>L. braziliensis</i> | 128 | 27   | 154  |
| LbrM06_V2.0690 | <i>L. braziliensis</i> | 52  | 207  | 258  |
| LbrM06_V2.0690 | <i>L. braziliensis</i> | 74  | 280  | 353  |
| LbrM06_V2.0700 | <i>L. braziliensis</i> | 126 | 1    | 126  |
| LbrM06_V2.0700 | <i>L. braziliensis</i> | 92  | 206  | 297  |
| LbrM06_V2.0700 | <i>L. braziliensis</i> | 90  | 333  | 422  |
| LbrM06_V2.0700 | <i>L. braziliensis</i> | 68  | 583  | 650  |
| LbrM06_V2.0700 | <i>L. braziliensis</i> | 46  | 670  | 715  |
| LbrM06_V2.0700 | <i>L. braziliensis</i> | 48  | 878  | 925  |
| LbrM06_V2.0700 | <i>L. braziliensis</i> | 182 | 1173 | 1354 |
| LbrM06_V2.0700 | <i>L. braziliensis</i> | 71  | 1585 | 1655 |
| LbrM06_V2.0700 | <i>L. braziliensis</i> | 48  | 1929 | 1976 |
| LbrM06_V2.0700 | <i>L. braziliensis</i> | 76  | 2347 | 2422 |
| LbrM06_V2.0700 | <i>L. braziliensis</i> | 191 | 2447 | 2637 |
| LbrM06_V2.0710 | <i>L. braziliensis</i> | 466 | 77   | 542  |
| LbrM06_V2.0710 | <i>L. braziliensis</i> | 105 | 561  | 665  |
| LbrM06_V2.0710 | <i>L. braziliensis</i> | 102 | 684  | 785  |
| LbrM06_V2.0710 | <i>L. braziliensis</i> | 82  | 832  | 913  |
| LbrM06_V2.0710 | <i>L. braziliensis</i> | 49  | 991  | 1039 |
| LbrM06_V2.0710 | <i>L. braziliensis</i> | 204 | 1071 | 1274 |
| LbrM06_V2.0710 | <i>L. braziliensis</i> | 86  | 1342 | 1427 |
| LbrM06_V2.0710 | <i>L. braziliensis</i> | 53  | 1598 | 1650 |
| LbrM06_V2.0730 | <i>L. braziliensis</i> | 553 | 1    | 553  |
| LbrM06_V2.0730 | <i>L. braziliensis</i> | 110 | 561  | 670  |
| LbrM06_V2.0730 | <i>L. braziliensis</i> | 76  | 746  | 821  |
| LbrM06_V2.0740 | <i>L. braziliensis</i> | 59  | 1    | 59   |
| LbrM06_V2.0740 | <i>L. braziliensis</i> | 119 | 142  | 260  |
| LbrM06_V2.0740 | <i>L. braziliensis</i> | 75  | 388  | 462  |
| LbrM06_V2.0740 | <i>L. braziliensis</i> | 69  | 540  | 608  |
| LbrM06_V2.0750 | <i>L. braziliensis</i> | 70  | 1    | 70   |
| LbrM06_V2.0750 | <i>L. braziliensis</i> | 67  | 168  | 234  |
| LbrM06_V2.0750 | <i>L. braziliensis</i> | 71  | 294  | 364  |

|                |                        |     |      |      |
|----------------|------------------------|-----|------|------|
| LbrM06_V2.0750 | <i>L. braziliensis</i> | 79  | 403  | 481  |
| LbrM06_V2.0750 | <i>L. braziliensis</i> | 586 | 486  | 1071 |
| LbrM06_V2.0750 | <i>L. braziliensis</i> | 94  | 1076 | 1169 |
| LbrM06_V2.0760 | <i>L. braziliensis</i> | 391 | 1    | 391  |
| LbrM06_V2.0760 | <i>L. braziliensis</i> | 348 | 418  | 765  |
| LbrM06_V2.0760 | <i>L. braziliensis</i> | 317 | 822  | 1138 |
| LbrM06_V2.0760 | <i>L. braziliensis</i> | 126 | 1230 | 1355 |
| LbrM06_V2.0760 | <i>L. braziliensis</i> | 50  | 1404 | 1453 |
| LbrM06_V2.0760 | <i>L. braziliensis</i> | 60  | 1468 | 1527 |
| LbrM06_V2.0760 | <i>L. braziliensis</i> | 208 | 1543 | 1750 |
| LbrM06_V2.0760 | <i>L. braziliensis</i> | 52  | 1782 | 1833 |
| LbrM06_V2.0770 | <i>L. braziliensis</i> | 199 | 34   | 232  |
| LbrM06_V2.0770 | <i>L. braziliensis</i> | 57  | 262  | 318  |
| LbrM06_V2.0770 | <i>L. braziliensis</i> | 128 | 352  | 479  |
| LbrM06_V2.0770 | <i>L. braziliensis</i> | 199 | 546  | 744  |
| LbrM06_V2.0770 | <i>L. braziliensis</i> | 104 | 789  | 892  |
| LbrM06_V2.0770 | <i>L. braziliensis</i> | 68  | 946  | 1013 |
| LbrM06_V2.0770 | <i>L. braziliensis</i> | 58  | 1146 | 1203 |
| LbrM06_V2.0780 | <i>L. braziliensis</i> | 199 | 47   | 245  |
| LbrM06_V2.0780 | <i>L. braziliensis</i> | 84  | 290  | 373  |
| LbrM06_V2.0780 | <i>L. braziliensis</i> | 122 | 437  | 558  |
| LbrM06_V2.0780 | <i>L. braziliensis</i> | 73  | 687  | 759  |
| LbrM06_V2.0780 | <i>L. braziliensis</i> | 102 | 786  | 887  |
| LbrM06_V2.0780 | <i>L. braziliensis</i> | 70  | 995  | 1064 |
| LbrM06_V2.0780 | <i>L. braziliensis</i> | 73  | 1118 | 1190 |
| LbrM06_V2.0780 | <i>L. braziliensis</i> | 153 | 1381 | 1533 |
| LbrM06_V2.0780 | <i>L. braziliensis</i> | 47  | 1551 | 1597 |
| LbrM06_V2.0780 | <i>L. braziliensis</i> | 45  | 1650 | 1694 |
| LbrM06_V2.0780 | <i>L. braziliensis</i> | 100 | 1894 | 1993 |
| LbrM06_V2.0780 | <i>L. braziliensis</i> | 65  | 2127 | 2191 |
| LbrM06_V2.0780 | <i>L. braziliensis</i> | 80  | 2346 | 2425 |
| LbrM06_V2.0780 | <i>L. braziliensis</i> | 49  | 2432 | 2480 |
| LbrM06_V2.0780 | <i>L. braziliensis</i> | 60  | 2724 | 2783 |
| LbrM06_V2.0780 | <i>L. braziliensis</i> | 68  | 2876 | 2943 |
| LbrM06_V2.0780 | <i>L. braziliensis</i> | 54  | 3165 | 3218 |
| LbrM06_V2.0780 | <i>L. braziliensis</i> | 106 | 3258 | 3363 |
| LbrM06_V2.0780 | <i>L. braziliensis</i> | 48  | 3511 | 3558 |
| LbrM06_V2.0790 | <i>L. braziliensis</i> | 186 | 1    | 186  |
| LbrM06_V2.0790 | <i>L. braziliensis</i> | 85  | 225  | 309  |
| LbrM06_V2.0800 | <i>L. braziliensis</i> | 45  | 92   | 136  |
| LbrM06_V2.0800 | <i>L. braziliensis</i> | 118 | 152  | 269  |
| LbrM06_V2.0800 | <i>L. braziliensis</i> | 56  | 372  | 427  |
| LbrM06_V2.0800 | <i>L. braziliensis</i> | 118 | 455  | 572  |
| LbrM06_V2.0800 | <i>L. braziliensis</i> | 209 | 831  | 1039 |
| LbrM06_V2.0800 | <i>L. braziliensis</i> | 316 | 1092 | 1407 |
| LbrM06_V2.0810 | <i>L. braziliensis</i> | 46  | 72   | 117  |
| LbrM06_V2.0810 | <i>L. braziliensis</i> | 111 | 128  | 238  |

|                |                        |     |      |      |
|----------------|------------------------|-----|------|------|
| LbrM06_V2.0820 | <i>L. braziliensis</i> | 351 | 72   | 422  |
| LbrM06_V2.0820 | <i>L. braziliensis</i> | 53  | 427  | 479  |
| LbrM06_V2.0820 | <i>L. braziliensis</i> | 270 | 518  | 787  |
| LbrM06_V2.0820 | <i>L. braziliensis</i> | 54  | 862  | 915  |
| LbrM06_V2.0820 | <i>L. braziliensis</i> | 96  | 985  | 1080 |
| LbrM06_V2.0820 | <i>L. braziliensis</i> | 92  | 1123 | 1214 |
| LbrM06_V2.0820 | <i>L. braziliensis</i> | 127 | 1219 | 1345 |
| LbrM06_V2.0820 | <i>L. braziliensis</i> | 83  | 1373 | 1455 |
| LbrM06_V2.0820 | <i>L. braziliensis</i> | 89  | 1503 | 1591 |
| LbrM06_V2.0820 | <i>L. braziliensis</i> | 686 | 1671 | 2356 |
| LbrM06_V2.0820 | <i>L. braziliensis</i> | 171 | 2389 | 2559 |
| LbrM06_V2.0820 | <i>L. braziliensis</i> | 76  | 2579 | 2654 |
| LbrM06_V2.0820 | <i>L. braziliensis</i> | 107 | 2714 | 2820 |
| LbrM06_V2.0820 | <i>L. braziliensis</i> | 48  | 2926 | 2973 |
| LbrM06_V2.0820 | <i>L. braziliensis</i> | 185 | 3156 | 3340 |
| LbrM06_V2.0840 | <i>L. braziliensis</i> | 73  | 1    | 73   |
| LbrM06_V2.0840 | <i>L. braziliensis</i> | 57  | 370  | 426  |
| LbrM06_V2.0840 | <i>L. braziliensis</i> | 57  | 370  | 426  |
| LbrM06_V2.0850 | <i>L. braziliensis</i> | 118 | 1    | 118  |
| LbrM06_V2.0860 | <i>L. braziliensis</i> | 93  | 24   | 116  |
| LbrM06_V2.0860 | <i>L. braziliensis</i> | 105 | 205  | 309  |
| LbrM06_V2.0860 | <i>L. braziliensis</i> | 186 | 518  | 703  |
| LbrM06_V2.0880 | <i>L. braziliensis</i> | 136 | 1    | 136  |
| LbrM06_V2.0880 | <i>L. braziliensis</i> | 80  | 155  | 234  |
| LbrM06_V2.0880 | <i>L. braziliensis</i> | 69  | 267  | 335  |
| LbrM06_V2.0880 | <i>L. braziliensis</i> | 48  | 349  | 396  |
| LbrM06_V2.0880 | <i>L. braziliensis</i> | 246 | 442  | 687  |
| LbrM06_V2.0880 | <i>L. braziliensis</i> | 177 | 730  | 906  |
| LbrM06_V2.0880 | <i>L. braziliensis</i> | 116 | 1028 | 1143 |
| LbrM06_V2.0880 | <i>L. braziliensis</i> | 59  | 1256 | 1314 |
| LbrM06_V2.0880 | <i>L. braziliensis</i> | 106 | 1341 | 1446 |
| LbrM06_V2.0880 | <i>L. braziliensis</i> | 51  | 1493 | 1543 |
| LbrM06_V2.0880 | <i>L. braziliensis</i> | 63  | 1605 | 1667 |
| LbrM06_V2.0880 | <i>L. braziliensis</i> | 167 | 1752 | 1918 |
| LbrM06_V2.0880 | <i>L. braziliensis</i> | 76  | 1999 | 2074 |
| LbrM06_V2.0900 | <i>L. braziliensis</i> | 71  | 245  | 315  |
| LbrM06_V2.0900 | <i>L. braziliensis</i> | 71  | 319  | 389  |
| LbrM06_V2.0900 | <i>L. braziliensis</i> | 56  | 413  | 468  |
| LbrM06_V2.0920 | <i>L. braziliensis</i> | 44  | 75   | 118  |
| LbrM06_V2.0920 | <i>L. braziliensis</i> | 55  | 205  | 259  |
| LbrM06_V2.0920 | <i>L. braziliensis</i> | 160 | 301  | 460  |
| LbrM06_V2.0950 | <i>L. braziliensis</i> | 70  | 445  | 514  |
| LbrM06_V2.0950 | <i>L. braziliensis</i> | 120 | 544  | 663  |
| LbrM06_V2.0950 | <i>L. braziliensis</i> | 80  | 705  | 784  |
| LbrM06_V2.0950 | <i>L. braziliensis</i> | 104 | 1229 | 1332 |
| LbrM06_V2.0950 | <i>L. braziliensis</i> | 108 | 1382 | 1489 |
| LbrM06_V2.0960 | <i>L. braziliensis</i> | 56  | 231  | 286  |

|                |                        |     |      |      |
|----------------|------------------------|-----|------|------|
| LbrM06_V2.0960 | <i>L. braziliensis</i> | 76  | 733  | 808  |
| LbrM06_V2.0960 | <i>L. braziliensis</i> | 76  | 733  | 808  |
| LbrM06_V2.0970 | <i>L. braziliensis</i> | 103 | 1    | 103  |
| LbrM06_V2.0970 | <i>L. braziliensis</i> | 77  | 174  | 250  |
| LbrM06_V2.0970 | <i>L. braziliensis</i> | 101 | 760  | 860  |
| LbrM06_V2.0970 | <i>L. braziliensis</i> | 162 | 877  | 1038 |
| LbrM06_V2.0980 | <i>L. braziliensis</i> | 89  | 79   | 167  |
| LbrM06_V2.0980 | <i>L. braziliensis</i> | 50  | 204  | 253  |
| LbrM06_V2.0980 | <i>L. braziliensis</i> | 50  | 204  | 253  |
| LbrM06_V2.0990 | <i>L. braziliensis</i> | 66  | 116  | 181  |
| LbrM06_V2.0990 | <i>L. braziliensis</i> | 42  | 283  | 324  |
| LbrM06_V2.0990 | <i>L. braziliensis</i> | 42  | 708  | 749  |
| LbrM06_V2.1000 | <i>L. braziliensis</i> | 50  | 1    | 50   |
| LbrM06_V2.1000 | <i>L. braziliensis</i> | 146 | 85   | 230  |
| LbrM06_V2.1010 | <i>L. braziliensis</i> | 49  | 150  | 198  |
| LbrM06_V2.1010 | <i>L. braziliensis</i> | 76  | 382  | 457  |
| LbrM06_V2.1010 | <i>L. braziliensis</i> | 157 | 536  | 692  |
| LbrM06_V2.1010 | <i>L. braziliensis</i> | 126 | 707  | 832  |
| LbrM06_V2.1020 | <i>L. braziliensis</i> | 190 | 1    | 190  |
| LbrM06_V2.1020 | <i>L. braziliensis</i> | 138 | 236  | 373  |
| LbrM06_V2.1020 | <i>L. braziliensis</i> | 105 | 441  | 545  |
| LbrM06_V2.1020 | <i>L. braziliensis</i> | 89  | 629  | 717  |
| LbrM06_V2.1040 | <i>L. braziliensis</i> | 43  | 271  | 313  |
| LbrM06_V2.1070 | <i>L. braziliensis</i> | 143 | 1    | 143  |
| LbrM06_V2.1070 | <i>L. braziliensis</i> | 86  | 185  | 270  |
| LbrM06_V2.1070 | <i>L. braziliensis</i> | 48  | 281  | 328  |
| LbrM06_V2.1070 | <i>L. braziliensis</i> | 97  | 517  | 613  |
| LbrM06_V2.1090 | <i>L. braziliensis</i> | 44  | 64   | 107  |
| LbrM06_V2.1090 | <i>L. braziliensis</i> | 234 | 134  | 367  |
| LbrM06_V2.1090 | <i>L. braziliensis</i> | 408 | 467  | 874  |
| LbrM06_V2.1090 | <i>L. braziliensis</i> | 231 | 902  | 1132 |
| LbrM06_V2.1090 | <i>L. braziliensis</i> | 44  | 1141 | 1184 |
| LbrM06_V2.1090 | <i>L. braziliensis</i> | 44  | 1221 | 1264 |
| LbrM06_V2.1120 | <i>L. braziliensis</i> | 66  | 40   | 105  |
| LbrM06_V2.1120 | <i>L. braziliensis</i> | 41  | 173  | 213  |
| LbrM06_V2.1120 | <i>L. braziliensis</i> | 63  | 338  | 400  |
| LbrM06_V2.1120 | <i>L. braziliensis</i> | 98  | 416  | 513  |
| LbrM06_V2.1120 | <i>L. braziliensis</i> | 51  | 734  | 784  |
| LbrM06_V2.1130 | <i>L. braziliensis</i> | 165 | 48   | 212  |
| LbrM06_V2.1130 | <i>L. braziliensis</i> | 57  | 269  | 325  |
| LbrM06_V2.1130 | <i>L. braziliensis</i> | 63  | 459  | 521  |
| LbrM06_V2.1140 | <i>L. braziliensis</i> | 47  | 62   | 108  |
| LbrM06_V2.1140 | <i>L. braziliensis</i> | 64  | 138  | 201  |
| LbrM06_V2.1140 | <i>L. braziliensis</i> | 48  | 495  | 542  |
| LbrM06_V2.1140 | <i>L. braziliensis</i> | 51  | 546  | 596  |
| LbrM06_V2.1140 | <i>L. braziliensis</i> | 40  | 791  | 830  |
| LbrM06_V2.1160 | <i>L. braziliensis</i> | 42  | 1    | 42   |



|                |                        |     |      |      |
|----------------|------------------------|-----|------|------|
| LbrM06_V2.1160 | <i>L. braziliensis</i> | 51  | 225  | 275  |
| LbrM06_V2.1160 | <i>L. braziliensis</i> | 45  | 411  | 455  |
| LbrM06_V2.1180 | <i>L. braziliensis</i> | 215 | 94   | 308  |
| LbrM06_V2.1190 | <i>L. braziliensis</i> | 81  | 1    | 81   |
| LbrM06_V2.1190 | <i>L. braziliensis</i> | 75  | 134  | 208  |
| LbrM06_V2.1190 | <i>L. braziliensis</i> | 103 | 225  | 327  |
| LbrM06_V2.1200 | <i>L. braziliensis</i> | 41  | 91   | 131  |
| LbrM06_V2.1200 | <i>L. braziliensis</i> | 46  | 512  | 557  |
| LbrM06_V2.1200 | <i>L. braziliensis</i> | 46  | 512  | 557  |
| LbrM06_V2.1210 | <i>L. braziliensis</i> | 67  | 77   | 143  |
| LbrM06_V2.1210 | <i>L. braziliensis</i> | 82  | 357  | 438  |
| LbrM06_V2.1210 | <i>L. braziliensis</i> | 304 | 451  | 754  |
| LbrM06_V2.1230 | <i>L. braziliensis</i> | 57  | 1    | 57   |
| LbrM06_V2.1230 | <i>L. braziliensis</i> | 59  | 129  | 187  |
| LbrM06_V2.1230 | <i>L. braziliensis</i> | 59  | 129  | 187  |
| LbrM06_V2.1240 | <i>L. braziliensis</i> | 51  | 1    | 51   |
| LbrM06_V2.1290 | <i>L. braziliensis</i> | 71  | 1    | 71   |
| LbrM06_V2.1290 | <i>L. braziliensis</i> | 126 | 123  | 248  |
| LbrM06_V2.1290 | <i>L. braziliensis</i> | 55  | 257  | 311  |
| LbrM06_V2.1290 | <i>L. braziliensis</i> | 551 | 321  | 871  |
| LbrM06_V2.1290 | <i>L. braziliensis</i> | 141 | 880  | 1020 |
| LbrM06_V2.1290 | <i>L. braziliensis</i> | 282 | 1052 | 1333 |
| LbrM06_V2.1290 | <i>L. braziliensis</i> | 292 | 1371 | 1662 |
| LbrM06_V2.1290 | <i>L. braziliensis</i> | 336 | 1772 | 2107 |
| LbrM06_V2.1290 | <i>L. braziliensis</i> | 147 | 2156 | 2302 |
| LbrM06_V2.1290 | <i>L. braziliensis</i> | 325 | 2312 | 2636 |
| LbrM06_V2.1290 | <i>L. braziliensis</i> | 106 | 2691 | 2796 |
| LbrM06_V2.1300 | <i>L. braziliensis</i> | 463 | 132  | 594  |
| LbrM07_V2.0020 | <i>L. braziliensis</i> | 55  | 1    | 55   |
| LbrM07_V2.0020 | <i>L. braziliensis</i> | 107 | 119  | 225  |
| LbrM07_V2.0040 | <i>L. braziliensis</i> | 43  | 172  | 214  |
| LbrM07_V2.0040 | <i>L. braziliensis</i> | 74  | 241  | 314  |
| LbrM07_V2.0040 | <i>L. braziliensis</i> | 74  | 241  | 314  |
| LbrM07_V2.0050 | <i>L. braziliensis</i> | 60  | 654  | 713  |
| LbrM07_V2.0060 | <i>L. braziliensis</i> | 45  | 73   | 117  |
| LbrM07_V2.0100 | <i>L. braziliensis</i> | 97  | 480  | 576  |
| LbrM07_V2.0120 | <i>L. braziliensis</i> | 49  | 1    | 49   |
| LbrM07_V2.0120 | <i>L. braziliensis</i> | 63  | 532  | 594  |
| LbrM07_V2.0120 | <i>L. braziliensis</i> | 45  | 1359 | 1403 |
| LbrM07_V2.0120 | <i>L. braziliensis</i> | 50  | 1863 | 1912 |
| LbrM07_V2.0120 | <i>L. braziliensis</i> | 46  | 2003 | 2048 |
| LbrM07_V2.0140 | <i>L. braziliensis</i> | 89  | 261  | 349  |
| LbrM07_V2.0150 | <i>L. braziliensis</i> | 63  | 20   | 82   |
| LbrM07_V2.0160 | <i>L. braziliensis</i> | 573 | 244  | 816  |
| LbrM07_V2.0170 | <i>L. braziliensis</i> | 142 | 188  | 329  |
| LbrM07_V2.0170 | <i>L. braziliensis</i> | 288 | 467  | 754  |
| LbrM07_V2.0170 | <i>L. braziliensis</i> | 157 | 838  | 994  |

|                |                        |     |      |      |
|----------------|------------------------|-----|------|------|
| LbrM07_V2.0180 | <i>L. braziliensis</i> | 109 | 1    | 109  |
| LbrM07_V2.0180 | <i>L. braziliensis</i> | 85  | 164  | 248  |
| LbrM07_V2.0180 | <i>L. braziliensis</i> | 43  | 267  | 309  |
| LbrM07_V2.0180 | <i>L. braziliensis</i> | 103 | 324  | 426  |
| LbrM07_V2.0180 | <i>L. braziliensis</i> | 40  | 471  | 510  |
| LbrM07_V2.0180 | <i>L. braziliensis</i> | 49  | 529  | 577  |
| LbrM07_V2.0180 | <i>L. braziliensis</i> | 52  | 601  | 652  |
| LbrM07_V2.0180 | <i>L. braziliensis</i> | 81  | 783  | 863  |
| LbrM07_V2.0180 | <i>L. braziliensis</i> | 74  | 872  | 945  |
| LbrM07_V2.0180 | <i>L. braziliensis</i> | 314 | 963  | 1276 |
| LbrM07_V2.0180 | <i>L. braziliensis</i> | 114 | 1347 | 1460 |
| LbrM07_V2.0180 | <i>L. braziliensis</i> | 57  | 1508 | 1564 |
| LbrM07_V2.0180 | <i>L. braziliensis</i> | 92  | 1619 | 1710 |
| LbrM07_V2.0180 | <i>L. braziliensis</i> | 226 | 1752 | 1977 |
| LbrM07_V2.0180 | <i>L. braziliensis</i> | 45  | 2023 | 2067 |
| LbrM07_V2.0200 | <i>L. braziliensis</i> | 49  | 38   | 86   |
| LbrM07_V2.0200 | <i>L. braziliensis</i> | 70  | 209  | 278  |
| LbrM07_V2.0200 | <i>L. braziliensis</i> | 79  | 379  | 457  |
| LbrM07_V2.0210 | <i>L. braziliensis</i> | 43  | 1    | 43   |
| LbrM07_V2.0220 | <i>L. braziliensis</i> | 72  | 44   | 115  |
| LbrM07_V2.0220 | <i>L. braziliensis</i> | 44  | 160  | 203  |
| LbrM07_V2.0230 | <i>L. braziliensis</i> | 91  | 1    | 91   |
| LbrM07_V2.0240 | <i>L. braziliensis</i> | 81  | 1    | 81   |
| LbrM07_V2.0240 | <i>L. braziliensis</i> | 57  | 131  | 187  |
| LbrM07_V2.0240 | <i>L. braziliensis</i> | 57  | 131  | 187  |
| LbrM07_V2.0250 | <i>L. braziliensis</i> | 78  | 150  | 227  |
| LbrM07_V2.0250 | <i>L. braziliensis</i> | 90  | 371  | 460  |
| LbrM07_V2.0250 | <i>L. braziliensis</i> | 42  | 467  | 508  |
| LbrM07_V2.0260 | <i>L. braziliensis</i> | 398 | 1    | 398  |
| LbrM07_V2.0260 | <i>L. braziliensis</i> | 200 | 406  | 605  |
| LbrM07_V2.0260 | <i>L. braziliensis</i> | 190 | 644  | 833  |
| LbrM07_V2.0260 | <i>L. braziliensis</i> | 316 | 863  | 1178 |
| LbrM07_V2.0260 | <i>L. braziliensis</i> | 42  | 1208 | 1249 |
| LbrM07_V2.0260 | <i>L. braziliensis</i> | 136 | 1369 | 1504 |
| LbrM07_V2.0260 | <i>L. braziliensis</i> | 136 | 1626 | 1761 |
| LbrM07_V2.0290 | <i>L. braziliensis</i> | 61  | 171  | 231  |
| LbrM07_V2.0290 | <i>L. braziliensis</i> | 212 | 347  | 558  |
| LbrM07_V2.0290 | <i>L. braziliensis</i> | 49  | 620  | 668  |
| LbrM07_V2.0290 | <i>L. braziliensis</i> | 182 | 816  | 997  |
| LbrM07_V2.0290 | <i>L. braziliensis</i> | 60  | 1040 | 1099 |
| LbrM07_V2.0290 | <i>L. braziliensis</i> | 141 | 1289 | 1429 |
| LbrM07_V2.0290 | <i>L. braziliensis</i> | 41  | 1623 | 1663 |
| LbrM07_V2.0290 | <i>L. braziliensis</i> | 89  | 1746 | 1834 |
| LbrM07_V2.0290 | <i>L. braziliensis</i> | 208 | 1968 | 2175 |
| LbrM07_V2.0290 | <i>L. braziliensis</i> | 99  | 2243 | 2341 |
| LbrM07_V2.0290 | <i>L. braziliensis</i> | 124 | 2544 | 2667 |
| LbrM07_V2.0290 | <i>L. braziliensis</i> | 248 | 2922 | 3169 |

|                |                        |     |      |      |
|----------------|------------------------|-----|------|------|
| LbrM07_V2.0290 | <i>L. braziliensis</i> | 72  | 3200 | 3271 |
| LbrM07_V2.0290 | <i>L. braziliensis</i> | 86  | 3437 | 3522 |
| LbrM07_V2.0290 | <i>L. braziliensis</i> | 58  | 3676 | 3733 |
| LbrM07_V2.0290 | <i>L. braziliensis</i> | 71  | 3804 | 3874 |
| LbrM07_V2.0290 | <i>L. braziliensis</i> | 101 | 3968 | 4068 |
| LbrM07_V2.0290 | <i>L. braziliensis</i> | 437 | 4070 | 4506 |
| LbrM07_V2.0290 | <i>L. braziliensis</i> | 260 | 4529 | 4788 |
| LbrM07_V2.0290 | <i>L. braziliensis</i> | 81  | 4880 | 4960 |
| LbrM07_V2.0290 | <i>L. braziliensis</i> | 114 | 5065 | 5178 |
| LbrM07_V2.0290 | <i>L. braziliensis</i> | 58  | 5252 | 5309 |
| LbrM07_V2.0290 | <i>L. braziliensis</i> | 44  | 5541 | 5584 |
| LbrM07_V2.0290 | <i>L. braziliensis</i> | 77  | 5756 | 5832 |
| LbrM07_V2.0310 | <i>L. braziliensis</i> | 218 | 80   | 297  |
| LbrM07_V2.0310 | <i>L. braziliensis</i> | 46  | 431  | 476  |
| LbrM07_V2.0310 | <i>L. braziliensis</i> | 98  | 535  | 632  |
| LbrM07_V2.0320 | <i>L. braziliensis</i> | 97  | 1    | 97   |
| LbrM07_V2.0320 | <i>L. braziliensis</i> | 46  | 249  | 294  |
| LbrM07_V2.0320 | <i>L. braziliensis</i> | 55  | 577  | 631  |
| LbrM07_V2.0320 | <i>L. braziliensis</i> | 86  | 658  | 743  |
| LbrM07_V2.0330 | <i>L. braziliensis</i> | 65  | 63   | 127  |
| LbrM07_V2.0330 | <i>L. braziliensis</i> | 296 | 574  | 869  |
| LbrM07_V2.0340 | <i>L. braziliensis</i> | 58  | 139  | 196  |
| LbrM07_V2.0340 | <i>L. braziliensis</i> | 102 | 244  | 345  |
| LbrM07_V2.0340 | <i>L. braziliensis</i> | 97  | 437  | 533  |
| LbrM07_V2.0350 | <i>L. braziliensis</i> | 80  | 41   | 120  |
| LbrM07_V2.0350 | <i>L. braziliensis</i> | 71  | 289  | 359  |
| LbrM07_V2.0350 | <i>L. braziliensis</i> | 46  | 425  | 470  |
| LbrM07_V2.0350 | <i>L. braziliensis</i> | 130 | 605  | 734  |
| LbrM07_V2.0350 | <i>L. braziliensis</i> | 63  | 767  | 829  |
| LbrM07_V2.0360 | <i>L. braziliensis</i> | 90  | 1    | 90   |
| LbrM07_V2.0360 | <i>L. braziliensis</i> | 72  | 531  | 602  |
| LbrM07_V2.0370 | <i>L. braziliensis</i> | 263 | 243  | 505  |
| LbrM07_V2.0370 | <i>L. braziliensis</i> | 74  | 572  | 645  |
| LbrM07_V2.0370 | <i>L. braziliensis</i> | 74  | 572  | 645  |
| LbrM07_V2.0390 | <i>L. braziliensis</i> | 45  | 1    | 45   |
| LbrM07_V2.0390 | <i>L. braziliensis</i> | 155 | 64   | 218  |
| LbrM07_V2.0390 | <i>L. braziliensis</i> | 60  | 346  | 405  |
| LbrM07_V2.0390 | <i>L. braziliensis</i> | 79  | 493  | 571  |
| LbrM07_V2.0390 | <i>L. braziliensis</i> | 86  | 600  | 685  |
| LbrM07_V2.0400 | <i>L. braziliensis</i> | 41  | 59   | 99   |
| LbrM07_V2.0400 | <i>L. braziliensis</i> | 128 | 152  | 279  |
| LbrM07_V2.0400 | <i>L. braziliensis</i> | 90  | 387  | 476  |
| LbrM07_V2.0400 | <i>L. braziliensis</i> | 95  | 593  | 687  |
| LbrM07_V2.0400 | <i>L. braziliensis</i> | 67  | 848  | 914  |
| LbrM07_V2.0400 | <i>L. braziliensis</i> | 60  | 958  | 1017 |
| LbrM07_V2.0400 | <i>L. braziliensis</i> | 92  | 1563 | 1654 |
| LbrM07_V2.0400 | <i>L. braziliensis</i> | 99  | 2070 | 2168 |

|                |                        |     |      |      |
|----------------|------------------------|-----|------|------|
| LbrM07_V2.0400 | <i>L. braziliensis</i> | 123 | 2208 | 2330 |
| LbrM07_V2.0400 | <i>L. braziliensis</i> | 127 | 2434 | 2560 |
| LbrM07_V2.0400 | <i>L. braziliensis</i> | 41  | 2704 | 2744 |
| LbrM07_V2.0400 | <i>L. braziliensis</i> | 53  | 2821 | 2873 |
| LbrM07_V2.0400 | <i>L. braziliensis</i> | 56  | 2991 | 3046 |
| LbrM07_V2.0400 | <i>L. braziliensis</i> | 56  | 3413 | 3468 |
| LbrM07_V2.0410 | <i>L. braziliensis</i> | 73  | 113  | 185  |
| LbrM07_V2.0410 | <i>L. braziliensis</i> | 62  | 423  | 484  |
| LbrM07_V2.0410 | <i>L. braziliensis</i> | 62  | 423  | 484  |
| LbrM07_V2.0420 | <i>L. braziliensis</i> | 192 | 124  | 315  |
| LbrM07_V2.0440 | <i>L. braziliensis</i> | 51  | 59   | 109  |
| LbrM07_V2.0450 | <i>L. braziliensis</i> | 72  | 40   | 111  |
| LbrM07_V2.0490 | <i>L. braziliensis</i> | 66  | 1    | 66   |
| LbrM07_V2.0500 | <i>L. braziliensis</i> | 169 | 1    | 169  |
| LbrM07_V2.0500 | <i>L. braziliensis</i> | 56  | 249  | 304  |
| LbrM07_V2.0500 | <i>L. braziliensis</i> | 106 | 315  | 420  |
| LbrM07_V2.0500 | <i>L. braziliensis</i> | 161 | 635  | 795  |
| LbrM07_V2.0500 | <i>L. braziliensis</i> | 120 | 960  | 1079 |
| LbrM07_V2.0500 | <i>L. braziliensis</i> | 58  | 1870 | 1927 |
| LbrM07_V2.0520 | <i>L. braziliensis</i> | 52  | 28   | 79   |
| LbrM07_V2.0540 | <i>L. braziliensis</i> | 52  | 1974 | 2025 |
| LbrM07_V2.0540 | <i>L. braziliensis</i> | 50  | 2112 | 2161 |
| LbrM07_V2.0540 | <i>L. braziliensis</i> | 44  | 2385 | 2428 |
| LbrM07_V2.0540 | <i>L. braziliensis</i> | 101 | 2479 | 2579 |
| LbrM07_V2.0540 | <i>L. braziliensis</i> | 43  | 2714 | 2756 |
| LbrM07_V2.0540 | <i>L. braziliensis</i> | 62  | 3401 | 3462 |
| LbrM07_V2.0540 | <i>L. braziliensis</i> | 56  | 3666 | 3721 |
| LbrM07_V2.0540 | <i>L. braziliensis</i> | 54  | 3799 | 3852 |
| LbrM07_V2.0540 | <i>L. braziliensis</i> | 48  | 3917 | 3964 |
| LbrM07_V2.0540 | <i>L. braziliensis</i> | 41  | 4223 | 4263 |
| LbrM07_V2.0540 | <i>L. braziliensis</i> | 45  | 4398 | 4442 |
| LbrM07_V2.0550 | <i>L. braziliensis</i> | 44  | 1    | 44   |
| LbrM07_V2.0550 | <i>L. braziliensis</i> | 50  | 116  | 165  |
| LbrM07_V2.0550 | <i>L. braziliensis</i> | 90  | 210  | 299  |
| LbrM07_V2.0550 | <i>L. braziliensis</i> | 93  | 303  | 395  |
| LbrM07_V2.0560 | <i>L. braziliensis</i> | 75  | 60   | 134  |
| LbrM07_V2.0570 | <i>L. braziliensis</i> | 75  | 60   | 134  |
| LbrM07_V2.0580 | <i>L. braziliensis</i> | 147 | 32   | 178  |
| LbrM07_V2.0590 | <i>L. braziliensis</i> | 64  | 1    | 64   |
| LbrM07_V2.0600 | <i>L. braziliensis</i> | 160 | 1    | 160  |
| LbrM07_V2.0600 | <i>L. braziliensis</i> | 158 | 230  | 387  |
| LbrM07_V2.0600 | <i>L. braziliensis</i> | 226 | 400  | 625  |
| LbrM07_V2.0610 | <i>L. braziliensis</i> | 245 | 95   | 339  |
| LbrM07_V2.0610 | <i>L. braziliensis</i> | 153 | 628  | 780  |
| LbrM07_V2.0610 | <i>L. braziliensis</i> | 72  | 800  | 871  |
| LbrM07_V2.0610 | <i>L. braziliensis</i> | 119 | 897  | 1015 |
| LbrM07_V2.0610 | <i>L. braziliensis</i> | 52  | 1067 | 1118 |

|                |                        |     |      |      |
|----------------|------------------------|-----|------|------|
| LbrM07_V2.0610 | <i>L. braziliensis</i> | 48  | 1152 | 1199 |
| LbrM07_V2.0610 | <i>L. braziliensis</i> | 78  | 1237 | 1314 |
| LbrM07_V2.0610 | <i>L. braziliensis</i> | 65  | 1545 | 1609 |
| LbrM07_V2.0620 | <i>L. braziliensis</i> | 57  | 169  | 225  |
| LbrM07_V2.0630 | <i>L. braziliensis</i> | 134 | 1    | 134  |
| LbrM07_V2.0630 | <i>L. braziliensis</i> | 219 | 251  | 469  |
| LbrM07_V2.0640 | <i>L. braziliensis</i> | 448 | 76   | 523  |
| LbrM07_V2.0640 | <i>L. braziliensis</i> | 43  | 600  | 642  |
| LbrM07_V2.0640 | <i>L. braziliensis</i> | 61  | 739  | 799  |
| LbrM07_V2.0640 | <i>L. braziliensis</i> | 94  | 997  | 1090 |
| LbrM07_V2.0640 | <i>L. braziliensis</i> | 89  | 1123 | 1211 |
| LbrM07_V2.0650 | <i>L. braziliensis</i> | 539 | 79   | 617  |
| LbrM07_V2.0650 | <i>L. braziliensis</i> | 48  | 728  | 775  |
| LbrM07_V2.0650 | <i>L. braziliensis</i> | 79  | 1012 | 1090 |
| LbrM07_V2.0670 | <i>L. braziliensis</i> | 45  | 109  | 153  |
| LbrM07_V2.0670 | <i>L. braziliensis</i> | 40  | 158  | 197  |
| LbrM07_V2.0670 | <i>L. braziliensis</i> | 40  | 158  | 197  |
| LbrM07_V2.0690 | <i>L. braziliensis</i> | 122 | 21   | 142  |
| LbrM07_V2.0690 | <i>L. braziliensis</i> | 129 | 144  | 272  |
| LbrM07_V2.0690 | <i>L. braziliensis</i> | 159 | 290  | 448  |
| LbrM07_V2.0730 | <i>L. braziliensis</i> | 122 | 1    | 122  |
| LbrM07_V2.0740 | <i>L. braziliensis</i> | 127 | 1    | 127  |
| LbrM07_V2.0760 | <i>L. braziliensis</i> | 69  | 1    | 69   |
| LbrM07_V2.0760 | <i>L. braziliensis</i> | 100 | 87   | 186  |
| LbrM07_V2.0760 | <i>L. braziliensis</i> | 67  | 213  | 279  |
| LbrM07_V2.0760 | <i>L. braziliensis</i> | 538 | 283  | 820  |
| LbrM07_V2.0760 | <i>L. braziliensis</i> | 197 | 877  | 1073 |
| LbrM07_V2.0760 | <i>L. braziliensis</i> | 112 | 1076 | 1187 |
| LbrM07_V2.0760 | <i>L. braziliensis</i> | 182 | 1295 | 1476 |
| LbrM07_V2.0760 | <i>L. braziliensis</i> | 41  | 1528 | 1568 |
| LbrM07_V2.0760 | <i>L. braziliensis</i> | 173 | 1661 | 1833 |
| LbrM07_V2.0770 | <i>L. braziliensis</i> | 78  | 1    | 78   |
| LbrM07_V2.0770 | <i>L. braziliensis</i> | 187 | 107  | 293  |
| LbrM07_V2.0770 | <i>L. braziliensis</i> | 57  | 308  | 364  |
| LbrM07_V2.0770 | <i>L. braziliensis</i> | 46  | 616  | 661  |
| LbrM07_V2.0770 | <i>L. braziliensis</i> | 136 | 757  | 892  |
| LbrM07_V2.0780 | <i>L. braziliensis</i> | 50  | 57   | 106  |
| LbrM07_V2.0780 | <i>L. braziliensis</i> | 44  | 148  | 191  |
| LbrM07_V2.0780 | <i>L. braziliensis</i> | 44  | 148  | 191  |
| LbrM07_V2.0790 | <i>L. braziliensis</i> | 64  | 31   | 94   |
| LbrM07_V2.0790 | <i>L. braziliensis</i> | 105 | 99   | 203  |
| LbrM07_V2.0790 | <i>L. braziliensis</i> | 186 | 218  | 403  |
| LbrM07_V2.0790 | <i>L. braziliensis</i> | 149 | 432  | 580  |
| LbrM07_V2.0800 | <i>L. braziliensis</i> | 92  | 865  | 956  |
| LbrM07_V2.0810 | <i>L. braziliensis</i> | 43  | 180  | 222  |
| LbrM07_V2.0820 | <i>L. braziliensis</i> | 137 | 1    | 137  |
| LbrM07_V2.0820 | <i>L. braziliensis</i> | 105 | 173  | 277  |

|                  |                        |     |      |      |
|------------------|------------------------|-----|------|------|
| LbrM07_V2.0820   | <i>L. braziliensis</i> | 77  | 316  | 392  |
| LbrM07_V2.0820   | <i>L. braziliensis</i> | 131 | 436  | 566  |
| LbrM07_V2.0820   | <i>L. braziliensis</i> | 40  | 597  | 636  |
| LbrM07_V2.0820   | <i>L. braziliensis</i> | 49  | 770  | 818  |
| LbrM07_V2.0820   | <i>L. braziliensis</i> | 106 | 965  | 1070 |
| LbrM07_V2.0820   | <i>L. braziliensis</i> | 79  | 1128 | 1206 |
| LbrM07_V2.0820   | <i>L. braziliensis</i> | 48  | 1445 | 1492 |
| LbrM07_V2.0820   | <i>L. braziliensis</i> | 103 | 1707 | 1809 |
| LbrM07_V2.0820   | <i>L. braziliensis</i> | 48  | 1829 | 1876 |
| LbrM07_V2.0820   | <i>L. braziliensis</i> | 53  | 1957 | 2009 |
| LbrM07_V2.0820   | <i>L. braziliensis</i> | 118 | 2111 | 2228 |
| LbrM07_V2.0820   | <i>L. braziliensis</i> | 73  | 2359 | 2431 |
| LbrM07_V2.0820   | <i>L. braziliensis</i> | 66  | 2654 | 2719 |
| LbrM07_V2.0820   | <i>L. braziliensis</i> | 139 | 2742 | 2880 |
| LbrM07_V2.0820   | <i>L. braziliensis</i> | 155 | 3038 | 3192 |
| LbrM07_V2.0820   | <i>L. braziliensis</i> | 108 | 3234 | 3341 |
| LbrM07_V2.0820   | <i>L. braziliensis</i> | 65  | 3486 | 3550 |
| LbrM07_V2.0820   | <i>L. braziliensis</i> | 58  | 3570 | 3627 |
| LbrM07_V2.0820   | <i>L. braziliensis</i> | 235 | 3665 | 3899 |
| LbrM07_V2.0830   | <i>L. braziliensis</i> | 141 | 124  | 264  |
| LbrM07_V2.0840   | <i>L. braziliensis</i> | 228 | 1    | 228  |
| LbrM07_V2.0840   | <i>L. braziliensis</i> | 131 | 323  | 453  |
| LbrM07_V2.0840   | <i>L. braziliensis</i> | 267 | 533  | 799  |
| LbrM07_V2.0840   | <i>L. braziliensis</i> | 82  | 925  | 1006 |
| LbrM07_V2.0850   | <i>L. braziliensis</i> | 49  | 1    | 49   |
| LbrM07_V2.0850   | <i>L. braziliensis</i> | 138 | 131  | 268  |
| LbrM07_V2.0860   | <i>L. braziliensis</i> | 111 | 74   | 184  |
| LbrM07_V2.0860   | <i>L. braziliensis</i> | 200 | 231  | 430  |
| LbrM07_V2.0870   | <i>L. braziliensis</i> | 172 | 34   | 205  |
| LbrM07_V2.0890   | <i>L. braziliensis</i> | 42  | 748  | 789  |
| LbrM07_V2.0890   | <i>L. braziliensis</i> | 47  | 1429 | 1475 |
| LbrM07_V2.0890   | <i>L. braziliensis</i> | 63  | 1877 | 1939 |
| LbrM07_V2.0890   | <i>L. braziliensis</i> | 92  | 2014 | 2105 |
| LbrM07_V2.0890   | <i>L. braziliensis</i> | 164 | 2110 | 2273 |
| LbrM07_V2.0890   | <i>L. braziliensis</i> | 89  | 2287 | 2375 |
| LbrM07_V2.0900   | <i>L. braziliensis</i> | 50  | 1    | 50   |
| LbrM07_V2.0910   | <i>L. braziliensis</i> | 47  | 427  | 473  |
| LbrM07_V2.0910   | <i>L. braziliensis</i> | 51  | 1840 | 1890 |
| LbrM07_V2.0910   | <i>L. braziliensis</i> | 51  | 1840 | 1890 |
| LbrM07_V2.0920.A | <i>L. braziliensis</i> | 47  | 424  | 470  |
| LbrM07_V2.0920.A | <i>L. braziliensis</i> | 40  | 622  | 661  |
| LbrM07_V2.0920.A | <i>L. braziliensis</i> | 40  | 622  | 661  |
| LbrM07_V2.0930   | <i>L. braziliensis</i> | 786 | 95   | 880  |
| LbrM07_V2.0930   | <i>L. braziliensis</i> | 133 | 906  | 1038 |
| LbrM07_V2.0930   | <i>L. braziliensis</i> | 228 | 1066 | 1293 |
| LbrM07_V2.0940   | <i>L. braziliensis</i> | 73  | 1    | 73   |
| LbrM07_V2.0940   | <i>L. braziliensis</i> | 44  | 132  | 175  |

|                |                        |      |      |      |
|----------------|------------------------|------|------|------|
| LbrM07_V2.0940 | <i>L. braziliensis</i> | 133  | 244  | 376  |
| LbrM07_V2.0950 | <i>L. braziliensis</i> | 236  | 1    | 236  |
| LbrM07_V2.0950 | <i>L. braziliensis</i> | 52   | 270  | 321  |
| LbrM07_V2.0950 | <i>L. braziliensis</i> | 45   | 353  | 397  |
| LbrM07_V2.0950 | <i>L. braziliensis</i> | 44   | 413  | 456  |
| LbrM07_V2.0950 | <i>L. braziliensis</i> | 201  | 533  | 733  |
| LbrM07_V2.0970 | <i>L. braziliensis</i> | 228  | 1    | 228  |
| LbrM07_V2.0970 | <i>L. braziliensis</i> | 43   | 339  | 381  |
| LbrM07_V2.0970 | <i>L. braziliensis</i> | 91   | 529  | 619  |
| LbrM07_V2.0970 | <i>L. braziliensis</i> | 88   | 814  | 901  |
| LbrM07_V2.0970 | <i>L. braziliensis</i> | 254  | 940  | 1193 |
| LbrM07_V2.0970 | <i>L. braziliensis</i> | 88   | 1204 | 1291 |
| LbrM07_V2.0970 | <i>L. braziliensis</i> | 81   | 1350 | 1430 |
| LbrM07_V2.0970 | <i>L. braziliensis</i> | 88   | 1490 | 1577 |
| LbrM07_V2.0970 | <i>L. braziliensis</i> | 288  | 1641 | 1928 |
| LbrM07_V2.0970 | <i>L. braziliensis</i> | 44   | 2064 | 2107 |
| LbrM07_V2.0980 | <i>L. braziliensis</i> | 76   | 102  | 177  |
| LbrM07_V2.0990 | <i>L. braziliensis</i> | 51   | 1    | 51   |
| LbrM07_V2.0990 | <i>L. braziliensis</i> | 75   | 379  | 453  |
| LbrM07_V2.0990 | <i>L. braziliensis</i> | 43   | 502  | 544  |
| LbrM07_V2.0990 | <i>L. braziliensis</i> | 77   | 583  | 659  |
| LbrM07_V2.0990 | <i>L. braziliensis</i> | 61   | 1215 | 1275 |
| LbrM07_V2.0990 | <i>L. braziliensis</i> | 103  | 1784 | 1886 |
| LbrM07_V2.0990 | <i>L. braziliensis</i> | 49   | 2306 | 2354 |
| LbrM07_V2.1000 | <i>L. braziliensis</i> | 97   | 1    | 97   |
| LbrM07_V2.1000 | <i>L. braziliensis</i> | 45   | 138  | 182  |
| LbrM07_V2.1000 | <i>L. braziliensis</i> | 495  | 185  | 679  |
| LbrM07_V2.1000 | <i>L. braziliensis</i> | 101  | 720  | 820  |
| LbrM07_V2.1000 | <i>L. braziliensis</i> | 120  | 891  | 1010 |
| LbrM07_V2.1000 | <i>L. braziliensis</i> | 145  | 1118 | 1262 |
| LbrM07_V2.1000 | <i>L. braziliensis</i> | 41   | 1283 | 1323 |
| LbrM07_V2.1000 | <i>L. braziliensis</i> | 42   | 1456 | 1497 |
| LbrM07_V2.1000 | <i>L. braziliensis</i> | 208  | 1577 | 1784 |
| LbrM07_V2.1000 | <i>L. braziliensis</i> | 89   | 1914 | 2002 |
| LbrM07_V2.1000 | <i>L. braziliensis</i> | 173  | 2050 | 2222 |
| LbrM07_V2.1000 | <i>L. braziliensis</i> | 48   | 2304 | 2351 |
| LbrM07_V2.1010 | <i>L. braziliensis</i> | 1095 | 1    | 1095 |
| LbrM07_V2.1020 | <i>L. braziliensis</i> | 75   | 46   | 120  |
| LbrM07_V2.1020 | <i>L. braziliensis</i> | 165  | 164  | 328  |
| LbrM07_V2.1020 | <i>L. braziliensis</i> | 122  | 693  | 814  |
| LbrM07_V2.1040 | <i>L. braziliensis</i> | 240  | 88   | 327  |
| LbrM07_V2.1050 | <i>L. braziliensis</i> | 46   | 1    | 46   |
| LbrM07_V2.1050 | <i>L. braziliensis</i> | 275  | 184  | 458  |
| LbrM07_V2.1060 | <i>L. braziliensis</i> | 44   | 1    | 44   |
| LbrM07_V2.1070 | <i>L. braziliensis</i> | 365  | 1    | 365  |
| LbrM07_V2.1070 | <i>L. braziliensis</i> | 47   | 588  | 634  |
| LbrM07_V2.1070 | <i>L. braziliensis</i> | 141  | 912  | 1052 |

|                |                        |     |      |      |
|----------------|------------------------|-----|------|------|
| LbrM07_V2.1080 | <i>L. braziliensis</i> | 57  | 14   | 70   |
| LbrM07_V2.1100 | <i>L. braziliensis</i> | 164 | 1    | 164  |
| LbrM07_V2.1100 | <i>L. braziliensis</i> | 41  | 193  | 233  |
| LbrM07_V2.1110 | <i>L. braziliensis</i> | 122 | 870  | 991  |
| LbrM07_V2.1120 | <i>L. braziliensis</i> | 47  | 1    | 47   |
| LbrM07_V2.1130 | <i>L. braziliensis</i> | 99  | 22   | 120  |
| LbrM07_V2.1140 | <i>L. braziliensis</i> | 94  | 105  | 198  |
| LbrM07_V2.1140 | <i>L. braziliensis</i> | 77  | 217  | 293  |
| LbrM07_V2.1150 | <i>L. braziliensis</i> | 195 | 343  | 537  |
| LbrM07_V2.1150 | <i>L. braziliensis</i> | 43  | 657  | 699  |
| LbrM07_V2.1170 | <i>L. braziliensis</i> | 73  | 1    | 73   |
| LbrM07_V2.1170 | <i>L. braziliensis</i> | 138 | 167  | 304  |
| LbrM07_V2.1190 | <i>L. braziliensis</i> | 40  | 35   | 74   |
| LbrM07_V2.1190 | <i>L. braziliensis</i> | 76  | 234  | 309  |
| LbrM07_V2.1190 | <i>L. braziliensis</i> | 76  | 234  | 309  |
| LbrM07_V2.1200 | <i>L. braziliensis</i> | 149 | 191  | 339  |
| LbrM07_V2.1230 | <i>L. braziliensis</i> | 136 | 54   | 189  |
| LbrM07_V2.1230 | <i>L. braziliensis</i> | 47  | 1103 | 1149 |
| LbrM07_V2.1230 | <i>L. braziliensis</i> | 50  | 1271 | 1320 |
| LbrM07_V2.1240 | <i>L. braziliensis</i> | 81  | 1    | 81   |
| LbrM07_V2.1260 | <i>L. braziliensis</i> | 700 | 53   | 752  |
| LbrM07_V2.1260 | <i>L. braziliensis</i> | 114 | 859  | 972  |
| LbrM07_V2.1260 | <i>L. braziliensis</i> | 45  | 1148 | 1192 |
| LbrM07_V2.1270 | <i>L. braziliensis</i> | 86  | 1    | 86   |
| LbrM07_V2.1270 | <i>L. braziliensis</i> | 45  | 296  | 340  |
| LbrM07_V2.1270 | <i>L. braziliensis</i> | 44  | 1021 | 1064 |
| LbrM07_V2.1270 | <i>L. braziliensis</i> | 84  | 1140 | 1223 |
| LbrM08_V2.0010 | <i>L. braziliensis</i> | 52  | 172  | 223  |
| LbrM08_V2.0010 | <i>L. braziliensis</i> | 273 | 240  | 512  |
| LbrM08_V2.0010 | <i>L. braziliensis</i> | 118 | 714  | 831  |
| LbrM08_V2.0010 | <i>L. braziliensis</i> | 84  | 853  | 936  |
| LbrM08_V2.0040 | <i>L. braziliensis</i> | 59  | 47   | 105  |
| LbrM08_V2.0070 | <i>L. braziliensis</i> | 73  | 75   | 147  |
| LbrM08_V2.0070 | <i>L. braziliensis</i> | 80  | 200  | 279  |
| LbrM08_V2.0070 | <i>L. braziliensis</i> | 121 | 289  | 409  |
| LbrM08_V2.0080 | <i>L. braziliensis</i> | 156 | 1    | 156  |
| LbrM08_V2.0080 | <i>L. braziliensis</i> | 45  | 602  | 646  |
| LbrM08_V2.0080 | <i>L. braziliensis</i> | 65  | 656  | 720  |
| LbrM08_V2.0090 | <i>L. braziliensis</i> | 194 | 659  | 852  |
| LbrM08_V2.0100 | <i>L. braziliensis</i> | 48  | 1    | 48   |
| LbrM08_V2.0100 | <i>L. braziliensis</i> | 86  | 254  | 339  |
| LbrM08_V2.0100 | <i>L. braziliensis</i> | 64  | 387  | 450  |
| LbrM08_V2.0110 | <i>L. braziliensis</i> | 40  | 120  | 159  |
| LbrM08_V2.0110 | <i>L. braziliensis</i> | 196 | 193  | 388  |
| LbrM08_V2.0110 | <i>L. braziliensis</i> | 266 | 489  | 754  |
| LbrM08_V2.0130 | <i>L. braziliensis</i> | 62  | 15   | 76   |
| LbrM08_V2.0130 | <i>L. braziliensis</i> | 182 | 147  | 328  |



|                |                        |     |      |      |
|----------------|------------------------|-----|------|------|
| LbrM08_V2.0130 | <i>L. braziliensis</i> | 799 | 349  | 1147 |
| LbrM08_V2.0150 | <i>L. braziliensis</i> | 50  | 303  | 352  |
| LbrM08_V2.0150 | <i>L. braziliensis</i> | 57  | 525  | 581  |
| LbrM08_V2.0150 | <i>L. braziliensis</i> | 83  | 683  | 765  |
| LbrM08_V2.0150 | <i>L. braziliensis</i> | 45  | 857  | 901  |
| LbrM08_V2.0150 | <i>L. braziliensis</i> | 65  | 961  | 1025 |
| LbrM08_V2.0160 | <i>L. braziliensis</i> | 72  | 1    | 72   |
| LbrM08_V2.0160 | <i>L. braziliensis</i> | 55  | 148  | 202  |
| LbrM08_V2.0160 | <i>L. braziliensis</i> | 59  | 283  | 341  |
| LbrM08_V2.0170 | <i>L. braziliensis</i> | 88  | 15   | 102  |
| LbrM08_V2.0180 | <i>L. braziliensis</i> | 111 | 235  | 345  |
| LbrM08_V2.0190 | <i>L. braziliensis</i> | 61  | 234  | 294  |
| LbrM08_V2.0200 | <i>L. braziliensis</i> | 63  | 1    | 63   |
| LbrM08_V2.0200 | <i>L. braziliensis</i> | 53  | 122  | 174  |
| LbrM08_V2.0200 | <i>L. braziliensis</i> | 53  | 122  | 174  |
| LbrM08_V2.0210 | <i>L. braziliensis</i> | 63  | 534  | 596  |
| LbrM08_V2.0220 | <i>L. braziliensis</i> | 80  | 39   | 118  |
| LbrM08_V2.0220 | <i>L. braziliensis</i> | 94  | 150  | 243  |
| LbrM08_V2.0220 | <i>L. braziliensis</i> | 163 | 262  | 424  |
| LbrM08_V2.0230 | <i>L. braziliensis</i> | 100 | 88   | 187  |
| LbrM08_V2.0230 | <i>L. braziliensis</i> | 54  | 465  | 518  |
| LbrM08_V2.0250 | <i>L. braziliensis</i> | 50  | 213  | 262  |
| LbrM08_V2.0260 | <i>L. braziliensis</i> | 50  | 64   | 113  |
| LbrM08_V2.0270 | <i>L. braziliensis</i> | 188 | 1    | 188  |
| LbrM08_V2.0270 | <i>L. braziliensis</i> | 432 | 211  | 642  |
| LbrM08_V2.0280 | <i>L. braziliensis</i> | 142 | 43   | 184  |
| LbrM08_V2.0280 | <i>L. braziliensis</i> | 95  | 277  | 371  |
| LbrM08_V2.0280 | <i>L. braziliensis</i> | 43  | 399  | 441  |
| LbrM08_V2.0280 | <i>L. braziliensis</i> | 73  | 497  | 569  |
| LbrM08_V2.0280 | <i>L. braziliensis</i> | 144 | 629  | 772  |
| LbrM08_V2.0320 | <i>L. braziliensis</i> | 41  | 332  | 372  |
| LbrM08_V2.0350 | <i>L. braziliensis</i> | 51  | 1    | 51   |
| LbrM08_V2.0350 | <i>L. braziliensis</i> | 53  | 246  | 298  |
| LbrM08_V2.0350 | <i>L. braziliensis</i> | 53  | 246  | 298  |
| LbrM08_V2.0380 | <i>L. braziliensis</i> | 88  | 1    | 88   |
| LbrM08_V2.0380 | <i>L. braziliensis</i> | 100 | 155  | 254  |
| LbrM08_V2.0380 | <i>L. braziliensis</i> | 66  | 533  | 598  |
| LbrM08_V2.0380 | <i>L. braziliensis</i> | 41  | 789  | 829  |
| LbrM08_V2.0380 | <i>L. braziliensis</i> | 47  | 966  | 1012 |
| LbrM08_V2.0380 | <i>L. braziliensis</i> | 70  | 1348 | 1417 |
| LbrM08_V2.0380 | <i>L. braziliensis</i> | 126 | 1519 | 1644 |
| LbrM08_V2.0380 | <i>L. braziliensis</i> | 53  | 1680 | 1732 |
| LbrM08_V2.0380 | <i>L. braziliensis</i> | 57  | 1858 | 1914 |
| LbrM08_V2.0380 | <i>L. braziliensis</i> | 45  | 2429 | 2473 |
| LbrM08_V2.0380 | <i>L. braziliensis</i> | 65  | 2849 | 2913 |
| LbrM08_V2.0380 | <i>L. braziliensis</i> | 189 | 3171 | 3359 |
| LbrM08_V2.0380 | <i>L. braziliensis</i> | 105 | 3392 | 3496 |

|                |                        |      |      |      |
|----------------|------------------------|------|------|------|
| LbrM08_V2.0380 | <i>L. braziliensis</i> | 52   | 3677 | 3728 |
| LbrM08_V2.0390 | <i>L. braziliensis</i> | 53   | 66   | 118  |
| LbrM08_V2.0390 | <i>L. braziliensis</i> | 51   | 198  | 248  |
| LbrM08_V2.0390 | <i>L. braziliensis</i> | 152  | 305  | 456  |
| LbrM08_V2.0390 | <i>L. braziliensis</i> | 254  | 474  | 727  |
| LbrM08_V2.0390 | <i>L. braziliensis</i> | 83   | 896  | 978  |
| LbrM08_V2.0390 | <i>L. braziliensis</i> | 111  | 1055 | 1165 |
| LbrM08_V2.0390 | <i>L. braziliensis</i> | 51   | 1204 | 1254 |
| LbrM08_V2.0390 | <i>L. braziliensis</i> | 285  | 1339 | 1623 |
| LbrM08_V2.0390 | <i>L. braziliensis</i> | 1182 | 1632 | 2813 |
| LbrM08_V2.0400 | <i>L. braziliensis</i> | 45   | 175  | 219  |
| LbrM08_V2.0400 | <i>L. braziliensis</i> | 79   | 268  | 346  |
| LbrM08_V2.0400 | <i>L. braziliensis</i> | 63   | 434  | 496  |
| LbrM08_V2.0400 | <i>L. braziliensis</i> | 53   | 578  | 630  |
| LbrM08_V2.0400 | <i>L. braziliensis</i> | 41   | 839  | 879  |
| LbrM08_V2.0400 | <i>L. braziliensis</i> | 56   | 881  | 936  |
| LbrM08_V2.0410 | <i>L. braziliensis</i> | 379  | 1    | 379  |
| LbrM08_V2.0410 | <i>L. braziliensis</i> | 47   | 397  | 443  |
| LbrM08_V2.0410 | <i>L. braziliensis</i> | 79   | 461  | 539  |
| LbrM08_V2.0410 | <i>L. braziliensis</i> | 391  | 570  | 960  |
| LbrM08_V2.0410 | <i>L. braziliensis</i> | 72   | 1062 | 1133 |
| LbrM08_V2.0420 | <i>L. braziliensis</i> | 74   | 71   | 144  |
| LbrM08_V2.0420 | <i>L. braziliensis</i> | 121  | 251  | 371  |
| LbrM08_V2.0420 | <i>L. braziliensis</i> | 80   | 404  | 483  |
| LbrM08_V2.0430 | <i>L. braziliensis</i> | 42   | 67   | 108  |
| LbrM08_V2.0440 | <i>L. braziliensis</i> | 186  | 1    | 186  |
| LbrM08_V2.0440 | <i>L. braziliensis</i> | 225  | 195  | 419  |
| LbrM08_V2.0440 | <i>L. braziliensis</i> | 97   | 500  | 596  |
| LbrM08_V2.0440 | <i>L. braziliensis</i> | 93   | 679  | 771  |
| LbrM08_V2.0440 | <i>L. braziliensis</i> | 51   | 785  | 835  |
| LbrM08_V2.0440 | <i>L. braziliensis</i> | 82   | 887  | 968  |
| LbrM08_V2.0440 | <i>L. braziliensis</i> | 276  | 1144 | 1419 |
| LbrM08_V2.0440 | <i>L. braziliensis</i> | 166  | 1703 | 1868 |
| LbrM08_V2.0450 | <i>L. braziliensis</i> | 62   | 1    | 62   |
| LbrM08_V2.0450 | <i>L. braziliensis</i> | 581  | 83   | 663  |
| LbrM08_V2.0450 | <i>L. braziliensis</i> | 86   | 735  | 820  |
| LbrM08_V2.0450 | <i>L. braziliensis</i> | 140  | 838  | 977  |
| LbrM08_V2.0450 | <i>L. braziliensis</i> | 143  | 1000 | 1142 |
| LbrM08_V2.0450 | <i>L. braziliensis</i> | 111  | 1197 | 1307 |
| LbrM08_V2.0450 | <i>L. braziliensis</i> | 155  | 1453 | 1607 |
| LbrM08_V2.0450 | <i>L. braziliensis</i> | 51   | 1658 | 1708 |
| LbrM08_V2.0450 | <i>L. braziliensis</i> | 159  | 1721 | 1879 |
| LbrM08_V2.0470 | <i>L. braziliensis</i> | 57   | 166  | 222  |
| LbrM08_V2.0470 | <i>L. braziliensis</i> | 40   | 973  | 1012 |
| LbrM08_V2.0470 | <i>L. braziliensis</i> | 40   | 973  | 1012 |
| LbrM08_V2.0480 | <i>L. braziliensis</i> | 186  | 1    | 186  |
| LbrM08_V2.0480 | <i>L. braziliensis</i> | 111  | 438  | 548  |

|                |                        |     |      |      |
|----------------|------------------------|-----|------|------|
| LbrM08_V2.0480 | <i>L. braziliensis</i> | 337 | 566  | 902  |
| LbrM08_V2.0480 | <i>L. braziliensis</i> | 62  | 912  | 973  |
| LbrM08_V2.0480 | <i>L. braziliensis</i> | 53  | 1088 | 1140 |
| LbrM08_V2.0480 | <i>L. braziliensis</i> | 84  | 1498 | 1581 |
| LbrM08_V2.0480 | <i>L. braziliensis</i> | 102 | 1596 | 1697 |
| LbrM08_V2.0480 | <i>L. braziliensis</i> | 110 | 1882 | 1991 |
| LbrM08_V2.0490 | <i>L. braziliensis</i> | 45  | 104  | 148  |
| LbrM08_V2.0490 | <i>L. braziliensis</i> | 145 | 178  | 322  |
| LbrM08_V2.0510 | <i>L. braziliensis</i> | 89  | 23   | 111  |
| LbrM08_V2.0510 | <i>L. braziliensis</i> | 114 | 163  | 276  |
| LbrM08_V2.0520 | <i>L. braziliensis</i> | 334 | 1    | 334  |
| LbrM08_V2.0520 | <i>L. braziliensis</i> | 99  | 374  | 472  |
| LbrM08_V2.0530 | <i>L. braziliensis</i> | 104 | 1    | 104  |
| LbrM08_V2.0530 | <i>L. braziliensis</i> | 48  | 112  | 159  |
| LbrM08_V2.0530 | <i>L. braziliensis</i> | 69  | 189  | 257  |
| LbrM08_V2.0530 | <i>L. braziliensis</i> | 80  | 263  | 342  |
| LbrM08_V2.0550 | <i>L. braziliensis</i> | 41  | 1    | 41   |
| LbrM08_V2.0550 | <i>L. braziliensis</i> | 85  | 348  | 432  |
| LbrM08_V2.0550 | <i>L. braziliensis</i> | 112 | 527  | 638  |
| LbrM08_V2.0550 | <i>L. braziliensis</i> | 65  | 917  | 981  |
| LbrM08_V2.0550 | <i>L. braziliensis</i> | 72  | 1046 | 1117 |
| LbrM08_V2.0550 | <i>L. braziliensis</i> | 106 | 1161 | 1266 |
| LbrM08_V2.0550 | <i>L. braziliensis</i> | 43  | 1435 | 1477 |
| LbrM08_V2.0550 | <i>L. braziliensis</i> | 146 | 1532 | 1677 |
| LbrM08_V2.0550 | <i>L. braziliensis</i> | 76  | 1803 | 1878 |
| LbrM08_V2.0560 | <i>L. braziliensis</i> | 155 | 1    | 155  |
| LbrM08_V2.0560 | <i>L. braziliensis</i> | 45  | 189  | 233  |
| LbrM08_V2.0560 | <i>L. braziliensis</i> | 46  | 363  | 408  |
| LbrM08_V2.0570 | <i>L. braziliensis</i> | 54  | 1    | 54   |
| LbrM08_V2.0570 | <i>L. braziliensis</i> | 78  | 141  | 218  |
| LbrM08_V2.0570 | <i>L. braziliensis</i> | 150 | 220  | 369  |
| LbrM08_V2.0570 | <i>L. braziliensis</i> | 215 | 457  | 671  |
| LbrM08_V2.0570 | <i>L. braziliensis</i> | 168 | 702  | 869  |
| LbrM08_V2.0570 | <i>L. braziliensis</i> | 165 | 899  | 1063 |
| LbrM08_V2.0570 | <i>L. braziliensis</i> | 72  | 1091 | 1162 |
| LbrM08_V2.0570 | <i>L. braziliensis</i> | 178 | 1170 | 1347 |
| LbrM08_V2.0570 | <i>L. braziliensis</i> | 154 | 1354 | 1507 |
| LbrM08_V2.0570 | <i>L. braziliensis</i> | 100 | 1613 | 1712 |
| LbrM08_V2.0570 | <i>L. braziliensis</i> | 61  | 1818 | 1878 |
| LbrM08_V2.0580 | <i>L. braziliensis</i> | 64  | 50   | 113  |
| LbrM08_V2.0580 | <i>L. braziliensis</i> | 47  | 142  | 188  |
| LbrM08_V2.0580 | <i>L. braziliensis</i> | 82  | 271  | 352  |
| LbrM08_V2.0590 | <i>L. braziliensis</i> | 95  | 1    | 95   |
| LbrM08_V2.0600 | <i>L. braziliensis</i> | 106 | 1    | 106  |
| LbrM08_V2.0600 | <i>L. braziliensis</i> | 64  | 121  | 184  |
| LbrM08_V2.0610 | <i>L. braziliensis</i> | 49  | 39   | 87   |
| LbrM08_V2.0620 | <i>L. braziliensis</i> | 68  | 150  | 217  |

|                |                        |     |      |      |
|----------------|------------------------|-----|------|------|
| LbrM08_V2.0630 | <i>L. braziliensis</i> | 64  | 159  | 222  |
| LbrM08_V2.0640 | <i>L. braziliensis</i> | 41  | 281  | 321  |
| LbrM08_V2.0640 | <i>L. braziliensis</i> | 180 | 509  | 688  |
| LbrM08_V2.0640 | <i>L. braziliensis</i> | 58  | 805  | 862  |
| LbrM08_V2.0640 | <i>L. braziliensis</i> | 100 | 959  | 1058 |
| LbrM08_V2.0640 | <i>L. braziliensis</i> | 70  | 1470 | 1539 |
| LbrM08_V2.0640 | <i>L. braziliensis</i> | 40  | 1708 | 1747 |
| LbrM08_V2.0640 | <i>L. braziliensis</i> | 53  | 1799 | 1851 |
| LbrM08_V2.0640 | <i>L. braziliensis</i> | 52  | 2015 | 2066 |
| LbrM08_V2.0640 | <i>L. braziliensis</i> | 59  | 2068 | 2126 |
| LbrM08_V2.0640 | <i>L. braziliensis</i> | 63  | 2253 | 2315 |
| LbrM08_V2.0640 | <i>L. braziliensis</i> | 47  | 2409 | 2455 |
| LbrM08_V2.0660 | <i>L. braziliensis</i> | 66  | 14   | 79   |
| LbrM08_V2.0660 | <i>L. braziliensis</i> | 47  | 195  | 241  |
| LbrM08_V2.0660 | <i>L. braziliensis</i> | 47  | 195  | 241  |
| LbrM08_V2.0700 | <i>L. braziliensis</i> | 64  | 1    | 64   |
| LbrM08_V2.0700 | <i>L. braziliensis</i> | 40  | 107  | 146  |
| LbrM08_V2.0700 | <i>L. braziliensis</i> | 67  | 182  | 248  |
| LbrM08_V2.0700 | <i>L. braziliensis</i> | 60  | 288  | 347  |
| LbrM08_V2.0700 | <i>L. braziliensis</i> | 90  | 364  | 453  |
| LbrM08_V2.0700 | <i>L. braziliensis</i> | 78  | 465  | 542  |
| LbrM08_V2.0700 | <i>L. braziliensis</i> | 191 | 872  | 1062 |
| LbrM08_V2.0700 | <i>L. braziliensis</i> | 66  | 1085 | 1150 |
| LbrM08_V2.0700 | <i>L. braziliensis</i> | 141 | 1182 | 1322 |
| LbrM08_V2.0700 | <i>L. braziliensis</i> | 77  | 1707 | 1783 |
| LbrM08_V2.0710 | <i>L. braziliensis</i> | 58  | 39   | 96   |
| LbrM08_V2.0710 | <i>L. braziliensis</i> | 44  | 333  | 376  |
| LbrM08_V2.0710 | <i>L. braziliensis</i> | 44  | 333  | 376  |
| LbrM08_V2.0720 | <i>L. braziliensis</i> | 83  | 1    | 83   |
| LbrM08_V2.0720 | <i>L. braziliensis</i> | 519 | 93   | 611  |
| LbrM08_V2.0720 | <i>L. braziliensis</i> | 270 | 640  | 909  |
| LbrM08_V2.0720 | <i>L. braziliensis</i> | 46  | 957  | 1002 |
| LbrM08_V2.0720 | <i>L. braziliensis</i> | 82  | 1343 | 1424 |
| LbrM08_V2.0730 | <i>L. braziliensis</i> | 132 | 30   | 161  |
| LbrM08_V2.0730 | <i>L. braziliensis</i> | 48  | 197  | 244  |
| LbrM08_V2.0730 | <i>L. braziliensis</i> | 56  | 292  | 347  |
| LbrM08_V2.0730 | <i>L. braziliensis</i> | 73  | 445  | 517  |
| LbrM08_V2.0730 | <i>L. braziliensis</i> | 41  | 640  | 680  |
| LbrM08_V2.0730 | <i>L. braziliensis</i> | 49  | 696  | 744  |
| LbrM08_V2.0730 | <i>L. braziliensis</i> | 107 | 787  | 893  |
| LbrM08_V2.0730 | <i>L. braziliensis</i> | 54  | 941  | 994  |
| LbrM08_V2.0730 | <i>L. braziliensis</i> | 185 | 1022 | 1206 |
| LbrM08_V2.0730 | <i>L. braziliensis</i> | 85  | 1252 | 1336 |
| LbrM08_V2.0730 | <i>L. braziliensis</i> | 70  | 1359 | 1428 |
| LbrM08_V2.0730 | <i>L. braziliensis</i> | 80  | 1531 | 1610 |
| LbrM08_V2.0730 | <i>L. braziliensis</i> | 62  | 1714 | 1775 |
| LbrM08_V2.0730 | <i>L. braziliensis</i> | 104 | 1780 | 1883 |

|                |                        |     |      |      |
|----------------|------------------------|-----|------|------|
| LbrM08_V2.0730 | <i>L. braziliensis</i> | 99  | 1930 | 2028 |
| LbrM08_V2.0740 | <i>L. braziliensis</i> | 50  | 156  | 205  |
| LbrM08_V2.0750 | <i>L. braziliensis</i> | 520 | 311  | 830  |
| LbrM08_V2.0750 | <i>L. braziliensis</i> | 122 | 931  | 1052 |
| LbrM08_V2.0760 | <i>L. braziliensis</i> | 67  | 25   | 91   |
| LbrM08_V2.0760 | <i>L. braziliensis</i> | 106 | 152  | 257  |
| LbrM08_V2.0760 | <i>L. braziliensis</i> | 106 | 152  | 257  |
| LbrM08_V2.0770 | <i>L. braziliensis</i> | 146 | 1    | 146  |
| LbrM08_V2.0780 | <i>L. braziliensis</i> | 94  | 80   | 173  |
| LbrM08_V2.0780 | <i>L. braziliensis</i> | 49  | 316  | 364  |
| LbrM08_V2.0780 | <i>L. braziliensis</i> | 48  | 381  | 428  |
| LbrM08_V2.0780 | <i>L. braziliensis</i> | 98  | 472  | 569  |
| LbrM08_V2.0790 | <i>L. braziliensis</i> | 218 | 23   | 240  |
| LbrM08_V2.0790 | <i>L. braziliensis</i> | 138 | 253  | 390  |
| LbrM08_V2.0790 | <i>L. braziliensis</i> | 211 | 440  | 650  |
| LbrM08_V2.0790 | <i>L. braziliensis</i> | 67  | 773  | 839  |
| LbrM08_V2.0800 | <i>L. braziliensis</i> | 40  | 239  | 278  |
| LbrM08_V2.0800 | <i>L. braziliensis</i> | 68  | 291  | 358  |
| LbrM08_V2.0800 | <i>L. braziliensis</i> | 74  | 445  | 518  |
| LbrM08_V2.0800 | <i>L. braziliensis</i> | 49  | 762  | 810  |
| LbrM08_V2.0800 | <i>L. braziliensis</i> | 55  | 936  | 990  |
| LbrM08_V2.0800 | <i>L. braziliensis</i> | 64  | 1355 | 1418 |
| LbrM08_V2.0800 | <i>L. braziliensis</i> | 133 | 1744 | 1876 |
| LbrM08_V2.0800 | <i>L. braziliensis</i> | 57  | 2015 | 2071 |
| LbrM08_V2.0800 | <i>L. braziliensis</i> | 63  | 2075 | 2137 |
| LbrM08_V2.0810 | <i>L. braziliensis</i> | 67  | 336  | 402  |
| LbrM08_V2.0820 | <i>L. braziliensis</i> | 106 | 336  | 441  |
| LbrM08_V2.0830 | <i>L. braziliensis</i> | 106 | 336  | 441  |
| LbrM08_V2.0840 | <i>L. braziliensis</i> | 49  | 1    | 49   |
| LbrM08_V2.0840 | <i>L. braziliensis</i> | 80  | 526  | 605  |
| LbrM08_V2.0840 | <i>L. braziliensis</i> | 80  | 526  | 605  |
| LbrM08_V2.0850 | <i>L. braziliensis</i> | 51  | 92   | 142  |
| LbrM08_V2.0860 | <i>L. braziliensis</i> | 51  | 118  | 168  |
| LbrM08_V2.0870 | <i>L. braziliensis</i> | 46  | 30   | 75   |
| LbrM08_V2.0870 | <i>L. braziliensis</i> | 48  | 120  | 167  |
| LbrM08_V2.0870 | <i>L. braziliensis</i> | 68  | 275  | 342  |
| LbrM08_V2.0880 | <i>L. braziliensis</i> | 73  | 182  | 254  |
| LbrM08_V2.0880 | <i>L. braziliensis</i> | 41  | 336  | 376  |
| LbrM08_V2.0880 | <i>L. braziliensis</i> | 47  | 469  | 515  |
| LbrM08_V2.0890 | <i>L. braziliensis</i> | 107 | 1    | 107  |
| LbrM08_V2.0890 | <i>L. braziliensis</i> | 48  | 427  | 474  |
| LbrM08_V2.0890 | <i>L. braziliensis</i> | 43  | 699  | 741  |
| LbrM08_V2.0910 | <i>L. braziliensis</i> | 291 | 377  | 667  |
| LbrM08_V2.0910 | <i>L. braziliensis</i> | 59  | 732  | 790  |
| LbrM08_V2.0920 | <i>L. braziliensis</i> | 89  | 204  | 292  |
| LbrM08_V2.0920 | <i>L. braziliensis</i> | 84  | 469  | 552  |
| LbrM08_V2.0920 | <i>L. braziliensis</i> | 53  | 630  | 682  |

|                |                        |     |      |      |
|----------------|------------------------|-----|------|------|
| LbrM08_V2.0920 | <i>L. braziliensis</i> | 81  | 698  | 778  |
| LbrM08_V2.0950 | <i>L. braziliensis</i> | 47  | 159  | 205  |
| LbrM08_V2.0950 | <i>L. braziliensis</i> | 106 | 265  | 370  |
| LbrM08_V2.0960 | <i>L. braziliensis</i> | 73  | 1060 | 1132 |
| LbrM08_V2.0980 | <i>L. braziliensis</i> | 209 | 77   | 285  |
| LbrM08_V2.0980 | <i>L. braziliensis</i> | 56  | 336  | 391  |
| LbrM08_V2.1000 | <i>L. braziliensis</i> | 125 | 155  | 279  |
| LbrM08_V2.1000 | <i>L. braziliensis</i> | 83  | 363  | 445  |
| LbrM08_V2.1000 | <i>L. braziliensis</i> | 51  | 466  | 516  |
| LbrM08_V2.1000 | <i>L. braziliensis</i> | 436 | 673  | 1108 |
| LbrM08_V2.1000 | <i>L. braziliensis</i> | 248 | 1544 | 1791 |
| LbrM08_V2.1000 | <i>L. braziliensis</i> | 207 | 1925 | 2131 |
| LbrM08_V2.1020 | <i>L. braziliensis</i> | 45  | 115  | 159  |
| LbrM08_V2.1020 | <i>L. braziliensis</i> | 41  | 245  | 285  |
| LbrM08_V2.1020 | <i>L. braziliensis</i> | 41  | 245  | 285  |
| LbrM08_V2.1040 | <i>L. braziliensis</i> | 139 | 60   | 198  |
| LbrM08_V2.1070 | <i>L. braziliensis</i> | 87  | 1    | 87   |
| LbrM08_V2.1070 | <i>L. braziliensis</i> | 80  | 116  | 195  |
| LbrM08_V2.1070 | <i>L. braziliensis</i> | 131 | 268  | 398  |
| LbrM08_V2.1070 | <i>L. braziliensis</i> | 128 | 414  | 541  |
| LbrM08_V2.1070 | <i>L. braziliensis</i> | 643 | 564  | 1206 |
| LbrM08_V2.1070 | <i>L. braziliensis</i> | 143 | 1215 | 1357 |
| LbrM09_V2.0010 | <i>L. braziliensis</i> | 75  | 13   | 87   |
| LbrM09_V2.0040 | <i>L. braziliensis</i> | 80  | 525  | 604  |
| LbrM09_V2.0050 | <i>L. braziliensis</i> | 45  | 260  | 304  |
| LbrM09_V2.0090 | <i>L. braziliensis</i> | 42  | 118  | 159  |
| LbrM09_V2.0090 | <i>L. braziliensis</i> | 59  | 257  | 315  |
| LbrM09_V2.0090 | <i>L. braziliensis</i> | 62  | 319  | 380  |
| LbrM09_V2.0090 | <i>L. braziliensis</i> | 45  | 573  | 617  |
| LbrM09_V2.0100 | <i>L. braziliensis</i> | 59  | 167  | 225  |
| LbrM09_V2.0110 | <i>L. braziliensis</i> | 77  | 24   | 100  |
| LbrM09_V2.0110 | <i>L. braziliensis</i> | 65  | 179  | 243  |
| LbrM09_V2.0110 | <i>L. braziliensis</i> | 65  | 179  | 243  |
| LbrM09_V2.0120 | <i>L. braziliensis</i> | 87  | 92   | 178  |
| LbrM09_V2.0120 | <i>L. braziliensis</i> | 322 | 261  | 582  |
| LbrM09_V2.0140 | <i>L. braziliensis</i> | 228 | 25   | 252  |
| LbrM09_V2.0140 | <i>L. braziliensis</i> | 207 | 261  | 467  |
| LbrM09_V2.0140 | <i>L. braziliensis</i> | 202 | 499  | 700  |
| LbrM09_V2.0150 | <i>L. braziliensis</i> | 66  | 185  | 250  |
| LbrM09_V2.0150 | <i>L. braziliensis</i> | 47  | 471  | 517  |
| LbrM09_V2.0150 | <i>L. braziliensis</i> | 55  | 557  | 611  |
| LbrM09_V2.0150 | <i>L. braziliensis</i> | 283 | 635  | 917  |
| LbrM09_V2.0150 | <i>L. braziliensis</i> | 127 | 961  | 1087 |
| LbrM09_V2.0160 | <i>L. braziliensis</i> | 65  | 245  | 309  |
| LbrM09_V2.0190 | <i>L. braziliensis</i> | 40  | 82   | 121  |
| LbrM09_V2.0210 | <i>L. braziliensis</i> | 79  | 54   | 132  |
| LbrM09_V2.0210 | <i>L. braziliensis</i> | 108 | 172  | 279  |

|                |                        |     |      |      |
|----------------|------------------------|-----|------|------|
| LbrM09_V2.0210 | <i>L. braziliensis</i> | 108 | 172  | 279  |
| LbrM09_V2.0220 | <i>L. braziliensis</i> | 53  | 573  | 625  |
| LbrM09_V2.0230 | <i>L. braziliensis</i> | 69  | 170  | 238  |
| LbrM09_V2.0240 | <i>L. braziliensis</i> | 89  | 57   | 145  |
| LbrM09_V2.0240 | <i>L. braziliensis</i> | 114 | 254  | 367  |
| LbrM09_V2.0240 | <i>L. braziliensis</i> | 62  | 724  | 785  |
| LbrM09_V2.0250 | <i>L. braziliensis</i> | 40  | 47   | 86   |
| LbrM09_V2.0250 | <i>L. braziliensis</i> | 68  | 629  | 696  |
| LbrM09_V2.0250 | <i>L. braziliensis</i> | 41  | 764  | 804  |
| LbrM09_V2.0260 | <i>L. braziliensis</i> | 122 | 1    | 122  |
| LbrM09_V2.0270 | <i>L. braziliensis</i> | 77  | 120  | 196  |
| LbrM09_V2.0270 | <i>L. braziliensis</i> | 57  | 247  | 303  |
| LbrM09_V2.0270 | <i>L. braziliensis</i> | 112 | 305  | 416  |
| LbrM09_V2.0270 | <i>L. braziliensis</i> | 106 | 581  | 686  |
| LbrM09_V2.0280 | <i>L. braziliensis</i> | 87  | 1    | 87   |
| LbrM09_V2.0280 | <i>L. braziliensis</i> | 49  | 244  | 292  |
| LbrM09_V2.0280 | <i>L. braziliensis</i> | 84  | 297  | 380  |
| LbrM09_V2.0280 | <i>L. braziliensis</i> | 106 | 438  | 543  |
| LbrM09_V2.0280 | <i>L. braziliensis</i> | 71  | 574  | 644  |
| LbrM09_V2.0280 | <i>L. braziliensis</i> | 40  | 659  | 698  |
| LbrM09_V2.0280 | <i>L. braziliensis</i> | 90  | 709  | 798  |
| LbrM09_V2.0280 | <i>L. braziliensis</i> | 475 | 822  | 1296 |
| LbrM09_V2.0280 | <i>L. braziliensis</i> | 45  | 1304 | 1348 |
| LbrM09_V2.0290 | <i>L. braziliensis</i> | 56  | 54   | 109  |
| LbrM09_V2.0290 | <i>L. braziliensis</i> | 65  | 144  | 208  |
| LbrM09_V2.0290 | <i>L. braziliensis</i> | 65  | 144  | 208  |
| LbrM09_V2.0300 | <i>L. braziliensis</i> | 450 | 1    | 450  |
| LbrM09_V2.0300 | <i>L. braziliensis</i> | 43  | 699  | 741  |
| LbrM09_V2.0300 | <i>L. braziliensis</i> | 40  | 792  | 831  |
| LbrM09_V2.0310 | <i>L. braziliensis</i> | 112 | 531  | 642  |
| LbrM09_V2.0320 | <i>L. braziliensis</i> | 62  | 636  | 697  |
| LbrM09_V2.0330 | <i>L. braziliensis</i> | 274 | 631  | 904  |
| LbrM09_V2.0330 | <i>L. braziliensis</i> | 44  | 987  | 1030 |
| LbrM09_V2.0340 | <i>L. braziliensis</i> | 267 | 1    | 267  |
| LbrM09_V2.0340 | <i>L. braziliensis</i> | 203 | 288  | 490  |
| LbrM09_V2.0340 | <i>L. braziliensis</i> | 86  | 497  | 582  |
| LbrM09_V2.0340 | <i>L. braziliensis</i> | 84  | 614  | 697  |
| LbrM09_V2.0340 | <i>L. braziliensis</i> | 56  | 755  | 810  |
| LbrM09_V2.0350 | <i>L. braziliensis</i> | 182 | 25   | 206  |
| LbrM09_V2.0350 | <i>L. braziliensis</i> | 40  | 920  | 959  |
| LbrM09_V2.0360 | <i>L. braziliensis</i> | 88  | 1    | 88   |
| LbrM09_V2.0390 | <i>L. braziliensis</i> | 67  | 95   | 161  |
| LbrM09_V2.0390 | <i>L. braziliensis</i> | 164 | 260  | 423  |
| LbrM09_V2.0400 | <i>L. braziliensis</i> | 48  | 1    | 48   |
| LbrM09_V2.0400 | <i>L. braziliensis</i> | 280 | 84   | 363  |
| LbrM09_V2.0400 | <i>L. braziliensis</i> | 246 | 501  | 746  |
| LbrM09_V2.0400 | <i>L. braziliensis</i> | 63  | 944  | 1006 |

|                |                        |     |      |      |
|----------------|------------------------|-----|------|------|
| LbrM09_V2.0400 | <i>L. braziliensis</i> | 112 | 1055 | 1166 |
| LbrM09_V2.0400 | <i>L. braziliensis</i> | 166 | 1188 | 1353 |
| LbrM09_V2.0400 | <i>L. braziliensis</i> | 78  | 1489 | 1566 |
| LbrM09_V2.0400 | <i>L. braziliensis</i> | 173 | 1610 | 1782 |
| LbrM09_V2.0400 | <i>L. braziliensis</i> | 85  | 1860 | 1944 |
| LbrM09_V2.0410 | <i>L. braziliensis</i> | 109 | 1    | 109  |
| LbrM09_V2.0420 | <i>L. braziliensis</i> | 97  | 19   | 115  |
| LbrM09_V2.0430 | <i>L. braziliensis</i> | 60  | 165  | 224  |
| LbrM09_V2.0430 | <i>L. braziliensis</i> | 85  | 417  | 501  |
| LbrM09_V2.0430 | <i>L. braziliensis</i> | 80  | 582  | 661  |
| LbrM09_V2.0430 | <i>L. braziliensis</i> | 92  | 726  | 817  |
| LbrM09_V2.0430 | <i>L. braziliensis</i> | 64  | 839  | 902  |
| LbrM09_V2.0430 | <i>L. braziliensis</i> | 158 | 922  | 1079 |
| LbrM09_V2.0440 | <i>L. braziliensis</i> | 241 | 123  | 363  |
| LbrM09_V2.0450 | <i>L. braziliensis</i> | 82  | 110  | 191  |
| LbrM09_V2.0450 | <i>L. braziliensis</i> | 63  | 246  | 308  |
| LbrM09_V2.0460 | <i>L. braziliensis</i> | 118 | 1    | 118  |
| LbrM09_V2.0460 | <i>L. braziliensis</i> | 100 | 207  | 306  |
| LbrM09_V2.0460 | <i>L. braziliensis</i> | 243 | 390  | 632  |
| LbrM09_V2.0460 | <i>L. braziliensis</i> | 118 | 668  | 785  |
| LbrM09_V2.0460 | <i>L. braziliensis</i> | 64  | 831  | 894  |
| LbrM09_V2.0460 | <i>L. braziliensis</i> | 101 | 922  | 1022 |
| LbrM09_V2.0470 | <i>L. braziliensis</i> | 50  | 1    | 50   |
| LbrM09_V2.0480 | <i>L. braziliensis</i> | 62  | 1    | 62   |
| LbrM09_V2.0480 | <i>L. braziliensis</i> | 152 | 198  | 349  |
| LbrM09_V2.0480 | <i>L. braziliensis</i> | 47  | 771  | 817  |
| LbrM09_V2.0480 | <i>L. braziliensis</i> | 66  | 843  | 908  |
| LbrM09_V2.0480 | <i>L. braziliensis</i> | 68  | 961  | 1028 |
| LbrM09_V2.0480 | <i>L. braziliensis</i> | 67  | 1422 | 1488 |
| LbrM09_V2.0480 | <i>L. braziliensis</i> | 71  | 1594 | 1664 |
| LbrM09_V2.0480 | <i>L. braziliensis</i> | 103 | 1873 | 1975 |
| LbrM09_V2.0480 | <i>L. braziliensis</i> | 59  | 1985 | 2043 |
| LbrM09_V2.0490 | <i>L. braziliensis</i> | 106 | 1    | 106  |
| LbrM09_V2.0490 | <i>L. braziliensis</i> | 114 | 134  | 247  |
| LbrM09_V2.0490 | <i>L. braziliensis</i> | 114 | 134  | 247  |
| LbrM09_V2.0500 | <i>L. braziliensis</i> | 64  | 32   | 95   |
| LbrM09_V2.0500 | <i>L. braziliensis</i> | 206 | 307  | 512  |
| LbrM09_V2.0510 | <i>L. braziliensis</i> | 40  | 364  | 403  |
| LbrM09_V2.0520 | <i>L. braziliensis</i> | 292 | 4    | 295  |
| LbrM09_V2.0520 | <i>L. braziliensis</i> | 44  | 333  | 376  |
| LbrM09_V2.0520 | <i>L. braziliensis</i> | 45  | 641  | 685  |
| LbrM09_V2.0520 | <i>L. braziliensis</i> | 157 | 726  | 882  |
| LbrM09_V2.0520 | <i>L. braziliensis</i> | 79  | 1248 | 1326 |
| LbrM09_V2.0520 | <i>L. braziliensis</i> | 356 | 1359 | 1714 |
| LbrM09_V2.0520 | <i>L. braziliensis</i> | 60  | 1742 | 1801 |
| LbrM09_V2.0530 | <i>L. braziliensis</i> | 147 | 162  | 308  |
| LbrM09_V2.0540 | <i>L. braziliensis</i> | 64  | 59   | 122  |



|                |                        |     |      |      |
|----------------|------------------------|-----|------|------|
| LbrM09_V2.0540 | <i>L. braziliensis</i> | 63  | 164  | 226  |
| LbrM09_V2.0540 | <i>L. braziliensis</i> | 170 | 600  | 769  |
| LbrM09_V2.0550 | <i>L. braziliensis</i> | 60  | 1    | 60   |
| LbrM09_V2.0550 | <i>L. braziliensis</i> | 87  | 77   | 163  |
| LbrM09_V2.0550 | <i>L. braziliensis</i> | 226 | 763  | 988  |
| LbrM09_V2.0560 | <i>L. braziliensis</i> | 723 | 1    | 723  |
| LbrM09_V2.0560 | <i>L. braziliensis</i> | 69  | 778  | 846  |
| LbrM09_V2.0560 | <i>L. braziliensis</i> | 76  | 869  | 944  |
| LbrM09_V2.0560 | <i>L. braziliensis</i> | 52  | 957  | 1008 |
| LbrM09_V2.0560 | <i>L. braziliensis</i> | 70  | 1046 | 1115 |
| LbrM09_V2.0570 | <i>L. braziliensis</i> | 71  | 41   | 111  |
| LbrM09_V2.0570 | <i>L. braziliensis</i> | 68  | 172  | 239  |
| LbrM09_V2.0570 | <i>L. braziliensis</i> | 74  | 260  | 333  |
| LbrM09_V2.0590 | <i>L. braziliensis</i> | 67  | 94   | 160  |
| LbrM09_V2.0590 | <i>L. braziliensis</i> | 134 | 213  | 346  |
| LbrM09_V2.0590 | <i>L. braziliensis</i> | 51  | 447  | 497  |
| LbrM09_V2.0610 | <i>L. braziliensis</i> | 58  | 35   | 92   |
| LbrM09_V2.0610 | <i>L. braziliensis</i> | 73  | 101  | 173  |
| LbrM09_V2.0610 | <i>L. braziliensis</i> | 57  | 191  | 247  |
| LbrM09_V2.0610 | <i>L. braziliensis</i> | 98  | 261  | 358  |
| LbrM09_V2.0610 | <i>L. braziliensis</i> | 56  | 367  | 422  |
| LbrM09_V2.0620 | <i>L. braziliensis</i> | 494 | 1    | 494  |
| LbrM09_V2.0630 | <i>L. braziliensis</i> | 67  | 221  | 287  |
| LbrM09_V2.0630 | <i>L. braziliensis</i> | 48  | 485  | 532  |
| LbrM09_V2.0630 | <i>L. braziliensis</i> | 68  | 571  | 638  |
| LbrM09_V2.0630 | <i>L. braziliensis</i> | 98  | 648  | 745  |
| LbrM09_V2.0630 | <i>L. braziliensis</i> | 119 | 995  | 1113 |
| LbrM09_V2.0630 | <i>L. braziliensis</i> | 67  | 1130 | 1196 |
| LbrM09_V2.0630 | <i>L. braziliensis</i> | 81  | 1232 | 1312 |
| LbrM09_V2.0630 | <i>L. braziliensis</i> | 117 | 1336 | 1452 |
| LbrM09_V2.0630 | <i>L. braziliensis</i> | 154 | 1544 | 1697 |
| LbrM09_V2.0630 | <i>L. braziliensis</i> | 107 | 1877 | 1983 |
| LbrM09_V2.0630 | <i>L. braziliensis</i> | 61  | 2381 | 2441 |
| LbrM09_V2.0640 | <i>L. braziliensis</i> | 55  | 1    | 55   |
| LbrM09_V2.0670 | <i>L. braziliensis</i> | 105 | 1    | 105  |
| LbrM09_V2.0670 | <i>L. braziliensis</i> | 71  | 122  | 192  |
| LbrM09_V2.0670 | <i>L. braziliensis</i> | 117 | 772  | 888  |
| LbrM09_V2.0670 | <i>L. braziliensis</i> | 80  | 898  | 977  |
| LbrM09_V2.0700 | <i>L. braziliensis</i> | 206 | 1    | 206  |
| LbrM09_V2.0700 | <i>L. braziliensis</i> | 113 | 244  | 356  |
| LbrM09_V2.0700 | <i>L. braziliensis</i> | 72  | 504  | 575  |
| LbrM09_V2.0700 | <i>L. braziliensis</i> | 44  | 649  | 692  |
| LbrM09_V2.0710 | <i>L. braziliensis</i> | 112 | 50   | 161  |
| LbrM09_V2.0710 | <i>L. braziliensis</i> | 44  | 209  | 252  |
| LbrM09_V2.0710 | <i>L. braziliensis</i> | 51  | 359  | 409  |
| LbrM09_V2.0710 | <i>L. braziliensis</i> | 194 | 636  | 829  |
| LbrM09_V2.0710 | <i>L. braziliensis</i> | 413 | 836  | 1248 |

|                |                        |     |      |      |
|----------------|------------------------|-----|------|------|
| LbrM09_V2.0720 | <i>L. braziliensis</i> | 48  | 141  | 188  |
| LbrM09_V2.0720 | <i>L. braziliensis</i> | 49  | 409  | 457  |
| LbrM09_V2.0720 | <i>L. braziliensis</i> | 49  | 409  | 457  |
| LbrM09_V2.0730 | <i>L. braziliensis</i> | 70  | 476  | 545  |
| LbrM09_V2.0730 | <i>L. braziliensis</i> | 48  | 577  | 624  |
| LbrM09_V2.0740 | <i>L. braziliensis</i> | 46  | 1    | 46   |
| LbrM09_V2.0740 | <i>L. braziliensis</i> | 55  | 158  | 212  |
| LbrM09_V2.0750 | <i>L. braziliensis</i> | 59  | 84   | 142  |
| LbrM09_V2.0750 | <i>L. braziliensis</i> | 42  | 189  | 230  |
| LbrM09_V2.0750 | <i>L. braziliensis</i> | 42  | 189  | 230  |
| LbrM09_V2.0760 | <i>L. braziliensis</i> | 58  | 66   | 123  |
| LbrM09_V2.0760 | <i>L. braziliensis</i> | 56  | 179  | 234  |
| LbrM09_V2.0760 | <i>L. braziliensis</i> | 86  | 260  | 345  |
| LbrM09_V2.0780 | <i>L. braziliensis</i> | 406 | 48   | 453  |
| LbrM09_V2.0790 | <i>L. braziliensis</i> | 104 | 1    | 104  |
| LbrM09_V2.0790 | <i>L. braziliensis</i> | 103 | 233  | 335  |
| LbrM09_V2.0790 | <i>L. braziliensis</i> | 51  | 364  | 414  |
| LbrM09_V2.0790 | <i>L. braziliensis</i> | 51  | 442  | 492  |
| LbrM09_V2.0800 | <i>L. braziliensis</i> | 147 | 208  | 354  |
| LbrM09_V2.0810 | <i>L. braziliensis</i> | 84  | 1    | 84   |
| LbrM09_V2.0810 | <i>L. braziliensis</i> | 96  | 445  | 540  |
| LbrM09_V2.0810 | <i>L. braziliensis</i> | 96  | 445  | 540  |
| LbrM09_V2.0820 | <i>L. braziliensis</i> | 47  | 198  | 244  |
| LbrM09_V2.0820 | <i>L. braziliensis</i> | 45  | 279  | 323  |
| LbrM09_V2.0820 | <i>L. braziliensis</i> | 65  | 806  | 870  |
| LbrM09_V2.0820 | <i>L. braziliensis</i> | 57  | 915  | 971  |
| LbrM09_V2.0820 | <i>L. braziliensis</i> | 44  | 1059 | 1102 |
| LbrM09_V2.0820 | <i>L. braziliensis</i> | 46  | 1259 | 1304 |
| LbrM09_V2.0820 | <i>L. braziliensis</i> | 64  | 1343 | 1406 |
| LbrM09_V2.0820 | <i>L. braziliensis</i> | 97  | 1561 | 1657 |
| LbrM09_V2.0830 | <i>L. braziliensis</i> | 43  | 37   | 79   |
| LbrM09_V2.0830 | <i>L. braziliensis</i> | 84  | 139  | 222  |
| LbrM09_V2.0830 | <i>L. braziliensis</i> | 77  | 634  | 710  |
| LbrM09_V2.0830 | <i>L. braziliensis</i> | 72  | 1001 | 1072 |
| LbrM09_V2.0840 | <i>L. braziliensis</i> | 74  | 22   | 95   |
| LbrM09_V2.0840 | <i>L. braziliensis</i> | 102 | 116  | 217  |
| LbrM09_V2.0840 | <i>L. braziliensis</i> | 75  | 274  | 348  |
| LbrM09_V2.0840 | <i>L. braziliensis</i> | 57  | 531  | 587  |
| LbrM09_V2.0840 | <i>L. braziliensis</i> | 83  | 707  | 789  |
| LbrM09_V2.0840 | <i>L. braziliensis</i> | 101 | 821  | 921  |
| LbrM09_V2.0840 | <i>L. braziliensis</i> | 66  | 952  | 1017 |
| LbrM09_V2.0840 | <i>L. braziliensis</i> | 49  | 1217 | 1265 |
| LbrM09_V2.0840 | <i>L. braziliensis</i> | 146 | 1319 | 1464 |
| LbrM09_V2.0840 | <i>L. braziliensis</i> | 42  | 1495 | 1536 |
| LbrM09_V2.0840 | <i>L. braziliensis</i> | 57  | 1628 | 1684 |
| LbrM09_V2.0840 | <i>L. braziliensis</i> | 41  | 1792 | 1832 |
| LbrM09_V2.0840 | <i>L. braziliensis</i> | 67  | 1975 | 2041 |

|                |                        |     |      |      |
|----------------|------------------------|-----|------|------|
| LbrM09_V2.0840 | <i>L. braziliensis</i> | 140 | 2153 | 2292 |
| LbrM09_V2.0840 | <i>L. braziliensis</i> | 74  | 2330 | 2403 |
| LbrM09_V2.0840 | <i>L. braziliensis</i> | 57  | 2491 | 2547 |
| LbrM09_V2.0840 | <i>L. braziliensis</i> | 84  | 2593 | 2676 |
| LbrM09_V2.0840 | <i>L. braziliensis</i> | 43  | 2775 | 2817 |
| LbrM09_V2.0840 | <i>L. braziliensis</i> | 195 | 2867 | 3061 |
| LbrM09_V2.0840 | <i>L. braziliensis</i> | 46  | 3073 | 3118 |
| LbrM09_V2.0840 | <i>L. braziliensis</i> | 86  | 3178 | 3263 |
| LbrM09_V2.0840 | <i>L. braziliensis</i> | 48  | 3559 | 3606 |
| LbrM09_V2.0840 | <i>L. braziliensis</i> | 76  | 3691 | 3766 |
| LbrM09_V2.0840 | <i>L. braziliensis</i> | 62  | 3801 | 3862 |
| LbrM09_V2.0840 | <i>L. braziliensis</i> | 52  | 3918 | 3969 |
| LbrM09_V2.0840 | <i>L. braziliensis</i> | 49  | 4140 | 4188 |
| LbrM09_V2.0840 | <i>L. braziliensis</i> | 72  | 4216 | 4287 |
| LbrM09_V2.0840 | <i>L. braziliensis</i> | 46  | 4328 | 4373 |
| LbrM09_V2.0840 | <i>L. braziliensis</i> | 87  | 4529 | 4615 |
| LbrM09_V2.0840 | <i>L. braziliensis</i> | 67  | 4674 | 4740 |
| LbrM09_V2.0840 | <i>L. braziliensis</i> | 70  | 4854 | 4923 |
| LbrM09_V2.0840 | <i>L. braziliensis</i> | 72  | 4962 | 5033 |
| LbrM09_V2.0840 | <i>L. braziliensis</i> | 284 | 5066 | 5349 |
| LbrM09_V2.0840 | <i>L. braziliensis</i> | 40  | 5385 | 5424 |
| LbrM09_V2.0850 | <i>L. braziliensis</i> | 46  | 1    | 46   |
| LbrM09_V2.0870 | <i>L. braziliensis</i> | 63  | 1    | 63   |
| LbrM09_V2.0870 | <i>L. braziliensis</i> | 286 | 127  | 412  |
| LbrM09_V2.0870 | <i>L. braziliensis</i> | 50  | 445  | 494  |
| LbrM09_V2.0870 | <i>L. braziliensis</i> | 64  | 523  | 586  |
| LbrM09_V2.0870 | <i>L. braziliensis</i> | 67  | 1128 | 1194 |
| LbrM09_V2.0880 | <i>L. braziliensis</i> | 63  | 40   | 102  |
| LbrM09_V2.0880 | <i>L. braziliensis</i> | 212 | 126  | 337  |
| LbrM09_V2.0880 | <i>L. braziliensis</i> | 230 | 450  | 679  |
| LbrM09_V2.0880 | <i>L. braziliensis</i> | 58  | 724  | 781  |
| LbrM09_V2.0880 | <i>L. braziliensis</i> | 498 | 844  | 1341 |
| LbrM09_V2.0890 | <i>L. braziliensis</i> | 44  | 82   | 125  |
| LbrM09_V2.0900 | <i>L. braziliensis</i> | 88  | 286  | 373  |
| LbrM09_V2.0900 | <i>L. braziliensis</i> | 51  | 509  | 559  |
| LbrM09_V2.0910 | <i>L. braziliensis</i> | 49  | 1    | 49   |
| LbrM09_V2.0910 | <i>L. braziliensis</i> | 48  | 74   | 121  |
| LbrM09_V2.0910 | <i>L. braziliensis</i> | 54  | 410  | 463  |
| LbrM09_V2.0930 | <i>L. braziliensis</i> | 56  | 204  | 259  |
| LbrM09_V2.0950 | <i>L. braziliensis</i> | 66  | 106  | 171  |
| LbrM09_V2.0960 | <i>L. braziliensis</i> | 89  | 1    | 89   |
| LbrM09_V2.0970 | <i>L. braziliensis</i> | 89  | 1    | 89   |
| LbrM09_V2.0980 | <i>L. braziliensis</i> | 89  | 1    | 89   |
| LbrM09_V2.0990 | <i>L. braziliensis</i> | 46  | 532  | 577  |
| LbrM09_V2.0990 | <i>L. braziliensis</i> | 317 | 745  | 1061 |
| LbrM09_V2.0990 | <i>L. braziliensis</i> | 66  | 1109 | 1174 |
| LbrM09_V2.1000 | <i>L. braziliensis</i> | 70  | 1    | 70   |

|                |                        |     |      |      |
|----------------|------------------------|-----|------|------|
| LbrM09_V2.1000 | <i>L. braziliensis</i> | 51  | 214  | 264  |
| LbrM09_V2.1000 | <i>L. braziliensis</i> | 72  | 507  | 578  |
| LbrM09_V2.1010 | <i>L. braziliensis</i> | 59  | 255  | 313  |
| LbrM09_V2.1010 | <i>L. braziliensis</i> | 90  | 563  | 652  |
| LbrM09_V2.1010 | <i>L. braziliensis</i> | 90  | 563  | 652  |
| LbrM09_V2.1020 | <i>L. braziliensis</i> | 61  | 202  | 262  |
| LbrM09_V2.1030 | <i>L. braziliensis</i> | 132 | 1    | 132  |
| LbrM09_V2.1030 | <i>L. braziliensis</i> | 231 | 173  | 403  |
| LbrM09_V2.1030 | <i>L. braziliensis</i> | 123 | 421  | 543  |
| LbrM09_V2.1030 | <i>L. braziliensis</i> | 94  | 550  | 643  |
| LbrM09_V2.1030 | <i>L. braziliensis</i> | 355 | 686  | 1040 |
| LbrM09_V2.1040 | <i>L. braziliensis</i> | 49  | 1025 | 1073 |
| LbrM09_V2.1040 | <i>L. braziliensis</i> | 56  | 1152 | 1207 |
| LbrM09_V2.1040 | <i>L. braziliensis</i> | 106 | 1664 | 1769 |
| LbrM09_V2.1040 | <i>L. braziliensis</i> | 65  | 1832 | 1896 |
| LbrM09_V2.1040 | <i>L. braziliensis</i> | 100 | 1912 | 2011 |
| LbrM09_V2.1040 | <i>L. braziliensis</i> | 76  | 2074 | 2149 |
| LbrM09_V2.1040 | <i>L. braziliensis</i> | 87  | 2244 | 2330 |
| LbrM09_V2.1040 | <i>L. braziliensis</i> | 75  | 2544 | 2618 |
| LbrM09_V2.1040 | <i>L. braziliensis</i> | 176 | 2758 | 2933 |
| LbrM09_V2.1040 | <i>L. braziliensis</i> | 169 | 3065 | 3233 |
| LbrM09_V2.1040 | <i>L. braziliensis</i> | 62  | 3404 | 3465 |
| LbrM09_V2.1040 | <i>L. braziliensis</i> | 200 | 3486 | 3685 |
| LbrM09_V2.1040 | <i>L. braziliensis</i> | 45  | 4154 | 4198 |
| LbrM09_V2.1040 | <i>L. braziliensis</i> | 57  | 4545 | 4601 |
| LbrM09_V2.1040 | <i>L. braziliensis</i> | 52  | 4668 | 4719 |
| LbrM09_V2.1040 | <i>L. braziliensis</i> | 233 | 4809 | 5041 |
| LbrM09_V2.1040 | <i>L. braziliensis</i> | 46  | 5045 | 5090 |
| LbrM09_V2.1040 | <i>L. braziliensis</i> | 63  | 5093 | 5155 |
| LbrM09_V2.1040 | <i>L. braziliensis</i> | 58  | 5271 | 5328 |
| LbrM09_V2.1050 | <i>L. braziliensis</i> | 53  | 129  | 181  |
| LbrM09_V2.1060 | <i>L. braziliensis</i> | 94  | 29   | 122  |
| LbrM09_V2.1080 | <i>L. braziliensis</i> | 109 | 1    | 109  |
| LbrM09_V2.1080 | <i>L. braziliensis</i> | 44  | 245  | 288  |
| LbrM09_V2.1090 | <i>L. braziliensis</i> | 99  | 1    | 99   |
| LbrM09_V2.1090 | <i>L. braziliensis</i> | 69  | 117  | 185  |
| LbrM09_V2.1090 | <i>L. braziliensis</i> | 172 | 212  | 383  |
| LbrM09_V2.1100 | <i>L. braziliensis</i> | 152 | 1    | 152  |
| LbrM09_V2.1110 | <i>L. braziliensis</i> | 72  | 138  | 209  |
| LbrM09_V2.1140 | <i>L. braziliensis</i> | 60  | 394  | 453  |
| LbrM09_V2.1150 | <i>L. braziliensis</i> | 104 | 1    | 104  |
| LbrM09_V2.1150 | <i>L. braziliensis</i> | 51  | 110  | 160  |
| LbrM09_V2.1160 | <i>L. braziliensis</i> | 64  | 1    | 64   |
| LbrM09_V2.1160 | <i>L. braziliensis</i> | 338 | 71   | 408  |
| LbrM09_V2.1160 | <i>L. braziliensis</i> | 120 | 410  | 529  |
| LbrM09_V2.1190 | <i>L. braziliensis</i> | 44  | 27   | 70   |
| LbrM09_V2.1200 | <i>L. braziliensis</i> | 58  | 1    | 58   |

|                |                        |     |      |      |
|----------------|------------------------|-----|------|------|
| LbrM09_V2.1200 | <i>L. braziliensis</i> | 58  | 123  | 180  |
| LbrM09_V2.1200 | <i>L. braziliensis</i> | 65  | 218  | 282  |
| LbrM09_V2.1210 | <i>L. braziliensis</i> | 90  | 1    | 90   |
| LbrM09_V2.1210 | <i>L. braziliensis</i> | 42  | 248  | 289  |
| LbrM09_V2.1210 | <i>L. braziliensis</i> | 84  | 442  | 525  |
| LbrM09_V2.1210 | <i>L. braziliensis</i> | 50  | 536  | 585  |
| LbrM09_V2.1230 | <i>L. braziliensis</i> | 63  | 1    | 63   |
| LbrM09_V2.1230 | <i>L. braziliensis</i> | 410 | 117  | 526  |
| LbrM09_V2.1240 | <i>L. braziliensis</i> | 92  | 1    | 92   |
| LbrM09_V2.1240 | <i>L. braziliensis</i> | 44  | 235  | 278  |
| LbrM09_V2.1240 | <i>L. braziliensis</i> | 50  | 450  | 499  |
| LbrM09_V2.1250 | <i>L. braziliensis</i> | 88  | 185  | 272  |
| LbrM09_V2.1250 | <i>L. braziliensis</i> | 72  | 623  | 694  |
| LbrM09_V2.1250 | <i>L. braziliensis</i> | 54  | 739  | 792  |
| LbrM09_V2.1250 | <i>L. braziliensis</i> | 53  | 877  | 929  |
| LbrM09_V2.1250 | <i>L. braziliensis</i> | 75  | 1041 | 1115 |
| LbrM09_V2.1250 | <i>L. braziliensis</i> | 44  | 1129 | 1172 |
| LbrM09_V2.1250 | <i>L. braziliensis</i> | 59  | 1210 | 1268 |
| LbrM09_V2.1250 | <i>L. braziliensis</i> | 74  | 1403 | 1476 |
| LbrM09_V2.1260 | <i>L. braziliensis</i> | 166 | 230  | 395  |
| LbrM09_V2.1270 | <i>L. braziliensis</i> | 245 | 189  | 433  |
| LbrM09_V2.1270 | <i>L. braziliensis</i> | 40  | 454  | 493  |
| LbrM09_V2.1280 | <i>L. braziliensis</i> | 63  | 1    | 63   |
| LbrM09_V2.1280 | <i>L. braziliensis</i> | 54  | 360  | 413  |
| LbrM09_V2.1280 | <i>L. braziliensis</i> | 54  | 360  | 413  |
| LbrM09_V2.1290 | <i>L. braziliensis</i> | 78  | 1    | 78   |
| LbrM09_V2.1290 | <i>L. braziliensis</i> | 68  | 201  | 268  |
| LbrM09_V2.1290 | <i>L. braziliensis</i> | 41  | 564  | 604  |
| LbrM09_V2.1290 | <i>L. braziliensis</i> | 48  | 655  | 702  |
| LbrM09_V2.1290 | <i>L. braziliensis</i> | 46  | 1156 | 1201 |
| LbrM09_V2.1290 | <i>L. braziliensis</i> | 268 | 1262 | 1529 |
| LbrM09_V2.1290 | <i>L. braziliensis</i> | 44  | 1642 | 1685 |
| LbrM09_V2.1290 | <i>L. braziliensis</i> | 51  | 1701 | 1751 |
| LbrM09_V2.1290 | <i>L. braziliensis</i> | 46  | 2111 | 2156 |
| LbrM09_V2.1290 | <i>L. braziliensis</i> | 46  | 2286 | 2331 |
| LbrM09_V2.1290 | <i>L. braziliensis</i> | 57  | 2489 | 2545 |
| LbrM09_V2.1310 | <i>L. braziliensis</i> | 52  | 122  | 173  |
| LbrM09_V2.1310 | <i>L. braziliensis</i> | 172 | 291  | 462  |
| LbrM09_V2.1330 | <i>L. braziliensis</i> | 91  | 60   | 150  |
| LbrM09_V2.1330 | <i>L. braziliensis</i> | 65  | 244  | 308  |
| LbrM09_V2.1330 | <i>L. braziliensis</i> | 65  | 244  | 308  |
| LbrM09_V2.1370 | <i>L. braziliensis</i> | 91  | 247  | 337  |
| LbrM09_V2.1380 | <i>L. braziliensis</i> | 108 | 248  | 355  |
| LbrM09_V2.1380 | <i>L. braziliensis</i> | 66  | 540  | 605  |
| LbrM09_V2.1380 | <i>L. braziliensis</i> | 66  | 540  | 605  |
| LbrM09_V2.1390 | <i>L. braziliensis</i> | 75  | 116  | 190  |
| LbrM09_V2.1400 | <i>L. braziliensis</i> | 44  | 1    | 44   |

|                |                        |     |      |      |
|----------------|------------------------|-----|------|------|
| LbrM09_V2.1420 | <i>L. braziliensis</i> | 72  | 1    | 72   |
| LbrM09_V2.1420 | <i>L. braziliensis</i> | 116 | 153  | 268  |
| LbrM09_V2.1430 | <i>L. braziliensis</i> | 187 | 1    | 187  |
| LbrM09_V2.1430 | <i>L. braziliensis</i> | 57  | 475  | 531  |
| LbrM09_V2.1430 | <i>L. braziliensis</i> | 57  | 475  | 531  |
| LbrM09_V2.1470 | <i>L. braziliensis</i> | 78  | 159  | 236  |
| LbrM09_V2.1470 | <i>L. braziliensis</i> | 76  | 408  | 483  |
| LbrM09_V2.1470 | <i>L. braziliensis</i> | 43  | 531  | 573  |
| LbrM09_V2.1480 | <i>L. braziliensis</i> | 98  | 21   | 118  |
| LbrM09_V2.1500 | <i>L. braziliensis</i> | 96  | 57   | 152  |
| LbrM09_V2.1540 | <i>L. braziliensis</i> | 50  | 269  | 318  |
| LbrM09_V2.1540 | <i>L. braziliensis</i> | 41  | 526  | 566  |
| LbrM09_V2.1540 | <i>L. braziliensis</i> | 41  | 526  | 566  |
| LbrM09_V2.1570 | <i>L. braziliensis</i> | 47  | 1    | 47   |
| LbrM09_V2.1580 | <i>L. braziliensis</i> | 57  | 143  | 199  |
| LbrM09_V2.1580 | <i>L. braziliensis</i> | 64  | 229  | 292  |
| LbrM09_V2.1580 | <i>L. braziliensis</i> | 86  | 1170 | 1255 |
| LbrM09_V2.1590 | <i>L. braziliensis</i> | 42  | 297  | 338  |
| LbrM09_V2.1600 | <i>L. braziliensis</i> | 75  | 57   | 131  |
| LbrM09_V2.1610 | <i>L. braziliensis</i> | 592 | 72   | 663  |
| LbrM09_V2.1620 | <i>L. braziliensis</i> | 72  | 1    | 72   |
| LbrM10_V2.0030 | <i>L. braziliensis</i> | 60  | 254  | 313  |
| LbrM10_V2.0100 | <i>L. braziliensis</i> | 181 | 54   | 234  |
| LbrM10_V2.0120 | <i>L. braziliensis</i> | 52  | 22   | 73   |
| LbrM10_V2.0120 | <i>L. braziliensis</i> | 50  | 105  | 154  |
| LbrM10_V2.0120 | <i>L. braziliensis</i> | 67  | 210  | 276  |
| LbrM10_V2.0130 | <i>L. braziliensis</i> | 46  | 168  | 213  |
| LbrM10_V2.0130 | <i>L. braziliensis</i> | 476 | 284  | 759  |
| LbrM10_V2.0140 | <i>L. braziliensis</i> | 129 | 71   | 199  |
| LbrM10_V2.0150 | <i>L. braziliensis</i> | 116 | 1    | 116  |
| LbrM10_V2.0150 | <i>L. braziliensis</i> | 233 | 135  | 367  |
| LbrM10_V2.0160 | <i>L. braziliensis</i> | 242 | 1    | 242  |
| LbrM10_V2.0160 | <i>L. braziliensis</i> | 200 | 257  | 456  |
| LbrM10_V2.0170 | <i>L. braziliensis</i> | 50  | 62   | 111  |
| LbrM10_V2.0170 | <i>L. braziliensis</i> | 60  | 431  | 490  |
| LbrM10_V2.0190 | <i>L. braziliensis</i> | 133 | 91   | 223  |
| LbrM10_V2.0190 | <i>L. braziliensis</i> | 281 | 289  | 569  |
| LbrM10_V2.0200 | <i>L. braziliensis</i> | 77  | 331  | 407  |
| LbrM10_V2.0210 | <i>L. braziliensis</i> | 52  | 420  | 471  |
| LbrM10_V2.0220 | <i>L. braziliensis</i> | 43  | 638  | 680  |
| LbrM10_V2.0230 | <i>L. braziliensis</i> | 49  | 224  | 272  |
| LbrM10_V2.0240 | <i>L. braziliensis</i> | 135 | 1    | 135  |
| LbrM10_V2.0250 | <i>L. braziliensis</i> | 46  | 1    | 46   |
| LbrM10_V2.0260 | <i>L. braziliensis</i> | 232 | 86   | 317  |
| LbrM10_V2.0260 | <i>L. braziliensis</i> | 179 | 319  | 497  |
| LbrM10_V2.0260 | <i>L. braziliensis</i> | 55  | 540  | 594  |
| LbrM10_V2.0270 | <i>L. braziliensis</i> | 51  | 1    | 51   |

|                |                        |     |      |      |
|----------------|------------------------|-----|------|------|
| LbrM10_V2.0270 | <i>L. braziliensis</i> | 45  | 86   | 130  |
| LbrM10_V2.0270 | <i>L. braziliensis</i> | 46  | 236  | 281  |
| LbrM10_V2.0290 | <i>L. braziliensis</i> | 137 | 1    | 137  |
| LbrM10_V2.0290 | <i>L. braziliensis</i> | 57  | 197  | 253  |
| LbrM10_V2.0290 | <i>L. braziliensis</i> | 89  | 306  | 394  |
| LbrM10_V2.0290 | <i>L. braziliensis</i> | 62  | 418  | 479  |
| LbrM10_V2.0290 | <i>L. braziliensis</i> | 79  | 682  | 760  |
| LbrM10_V2.0290 | <i>L. braziliensis</i> | 42  | 775  | 816  |
| LbrM10_V2.0290 | <i>L. braziliensis</i> | 54  | 875  | 928  |
| LbrM10_V2.0300 | <i>L. braziliensis</i> | 58  | 1    | 58   |
| LbrM10_V2.0300 | <i>L. braziliensis</i> | 112 | 151  | 262  |
| LbrM10_V2.0300 | <i>L. braziliensis</i> | 75  | 408  | 482  |
| LbrM10_V2.0300 | <i>L. braziliensis</i> | 101 | 531  | 631  |
| LbrM10_V2.0300 | <i>L. braziliensis</i> | 345 | 640  | 984  |
| LbrM10_V2.0300 | <i>L. braziliensis</i> | 59  | 1211 | 1269 |
| LbrM10_V2.0300 | <i>L. braziliensis</i> | 79  | 1295 | 1373 |
| LbrM10_V2.0300 | <i>L. braziliensis</i> | 245 | 1555 | 1799 |
| LbrM10_V2.0300 | <i>L. braziliensis</i> | 112 | 1832 | 1943 |
| LbrM10_V2.0300 | <i>L. braziliensis</i> | 78  | 2038 | 2115 |
| LbrM10_V2.0300 | <i>L. braziliensis</i> | 112 | 2177 | 2288 |
| LbrM10_V2.0320 | <i>L. braziliensis</i> | 265 | 1    | 265  |
| LbrM10_V2.0320 | <i>L. braziliensis</i> | 334 | 312  | 645  |
| LbrM10_V2.0330 | <i>L. braziliensis</i> | 236 | 1    | 236  |
| LbrM10_V2.0330 | <i>L. braziliensis</i> | 48  | 447  | 494  |
| LbrM10_V2.0330 | <i>L. braziliensis</i> | 48  | 447  | 494  |
| LbrM10_V2.0340 | <i>L. braziliensis</i> | 83  | 35   | 117  |
| LbrM10_V2.0340 | <i>L. braziliensis</i> | 169 | 243  | 411  |
| LbrM10_V2.0340 | <i>L. braziliensis</i> | 89  | 454  | 542  |
| LbrM10_V2.0340 | <i>L. braziliensis</i> | 104 | 698  | 801  |
| LbrM10_V2.0340 | <i>L. braziliensis</i> | 133 | 838  | 970  |
| LbrM10_V2.0340 | <i>L. braziliensis</i> | 57  | 974  | 1030 |
| LbrM10_V2.0340 | <i>L. braziliensis</i> | 51  | 1047 | 1097 |
| LbrM10_V2.0340 | <i>L. braziliensis</i> | 78  | 1104 | 1181 |
| LbrM10_V2.0340 | <i>L. braziliensis</i> | 171 | 1312 | 1482 |
| LbrM10_V2.0340 | <i>L. braziliensis</i> | 313 | 1501 | 1813 |
| LbrM10_V2.0340 | <i>L. braziliensis</i> | 134 | 1913 | 2046 |
| LbrM10_V2.0360 | <i>L. braziliensis</i> | 61  | 24   | 84   |
| LbrM10_V2.0360 | <i>L. braziliensis</i> | 52  | 285  | 336  |
| LbrM10_V2.0360 | <i>L. braziliensis</i> | 130 | 345  | 474  |
| LbrM10_V2.0370 | <i>L. braziliensis</i> | 63  | 270  | 332  |
| LbrM10_V2.0370 | <i>L. braziliensis</i> | 44  | 637  | 680  |
| LbrM10_V2.0370 | <i>L. braziliensis</i> | 44  | 637  | 680  |
| LbrM10_V2.0380 | <i>L. braziliensis</i> | 64  | 274  | 337  |
| LbrM10_V2.0380 | <i>L. braziliensis</i> | 51  | 647  | 697  |
| LbrM10_V2.0390 | <i>L. braziliensis</i> | 63  | 272  | 334  |
| LbrM10_V2.0400 | <i>L. braziliensis</i> | 64  | 274  | 337  |
| LbrM10_V2.0400 | <i>L. braziliensis</i> | 45  | 653  | 697  |

|                |                        |     |      |      |
|----------------|------------------------|-----|------|------|
| LbrM10_V2.0410 | <i>L. braziliensis</i> | 49  | 1    | 49   |
| LbrM10_V2.0410 | <i>L. braziliensis</i> | 49  | 320  | 368  |
| LbrM10_V2.0430 | <i>L. braziliensis</i> | 142 | 1    | 142  |
| LbrM10_V2.0430 | <i>L. braziliensis</i> | 261 | 148  | 408  |
| LbrM10_V2.0430 | <i>L. braziliensis</i> | 211 | 483  | 693  |
| LbrM10_V2.0440 | <i>L. braziliensis</i> | 43  | 50   | 92   |
| LbrM10_V2.0450 | <i>L. braziliensis</i> | 53  | 76   | 128  |
| LbrM10_V2.0450 | <i>L. braziliensis</i> | 53  | 176  | 228  |
| LbrM10_V2.0450 | <i>L. braziliensis</i> | 53  | 176  | 228  |
| LbrM10_V2.0480 | <i>L. braziliensis</i> | 44  | 57   | 100  |
| LbrM10_V2.0520 | <i>L. braziliensis</i> | 46  | 456  | 501  |
| LbrM10_V2.0630 | <i>L. braziliensis</i> | 89  | 409  | 497  |
| LbrM10_V2.0630 | <i>L. braziliensis</i> | 48  | 753  | 800  |
| LbrM10_V2.0630 | <i>L. braziliensis</i> | 46  | 1077 | 1122 |
| LbrM10_V2.0630 | <i>L. braziliensis</i> | 55  | 1733 | 1787 |
| LbrM10_V2.0630 | <i>L. braziliensis</i> | 60  | 2328 | 2387 |
| LbrM10_V2.0630 | <i>L. braziliensis</i> | 45  | 4841 | 4885 |
| LbrM10_V2.0630 | <i>L. braziliensis</i> | 59  | 6157 | 6215 |
| LbrM10_V2.0630 | <i>L. braziliensis</i> | 311 | 6423 | 6733 |
| LbrM10_V2.0650 | <i>L. braziliensis</i> | 71  | 24   | 94   |
| LbrM10_V2.0650 | <i>L. braziliensis</i> | 139 | 352  | 490  |
| LbrM10_V2.0650 | <i>L. braziliensis</i> | 144 | 764  | 907  |
| LbrM10_V2.0660 | <i>L. braziliensis</i> | 221 | 1    | 221  |
| LbrM10_V2.0660 | <i>L. braziliensis</i> | 114 | 263  | 376  |
| LbrM10_V2.0660 | <i>L. braziliensis</i> | 59  | 406  | 464  |
| LbrM10_V2.0660 | <i>L. braziliensis</i> | 98  | 479  | 576  |
| LbrM10_V2.0660 | <i>L. braziliensis</i> | 123 | 597  | 719  |
| LbrM10_V2.0660 | <i>L. braziliensis</i> | 66  | 730  | 795  |
| LbrM10_V2.0660 | <i>L. braziliensis</i> | 363 | 810  | 1172 |
| LbrM10_V2.0670 | <i>L. braziliensis</i> | 56  | 245  | 300  |
| LbrM10_V2.0670 | <i>L. braziliensis</i> | 176 | 529  | 704  |
| LbrM10_V2.0670 | <i>L. braziliensis</i> | 284 | 761  | 1044 |
| LbrM10_V2.0680 | <i>L. braziliensis</i> | 61  | 1    | 61   |
| LbrM10_V2.0700 | <i>L. braziliensis</i> | 50  | 430  | 479  |
| LbrM10_V2.0710 | <i>L. braziliensis</i> | 122 | 1    | 122  |
| LbrM10_V2.0710 | <i>L. braziliensis</i> | 57  | 161  | 217  |
| LbrM10_V2.0710 | <i>L. braziliensis</i> | 59  | 317  | 375  |
| LbrM10_V2.0710 | <i>L. braziliensis</i> | 46  | 439  | 484  |
| LbrM10_V2.0710 | <i>L. braziliensis</i> | 163 | 535  | 697  |
| LbrM10_V2.0750 | <i>L. braziliensis</i> | 85  | 141  | 225  |
| LbrM10_V2.0750 | <i>L. braziliensis</i> | 42  | 255  | 296  |
| LbrM10_V2.0750 | <i>L. braziliensis</i> | 76  | 429  | 504  |
| LbrM10_V2.0780 | <i>L. braziliensis</i> | 71  | 105  | 175  |
| LbrM10_V2.0790 | <i>L. braziliensis</i> | 77  | 119  | 195  |
| LbrM10_V2.0790 | <i>L. braziliensis</i> | 55  | 230  | 284  |
| LbrM10_V2.0800 | <i>L. braziliensis</i> | 293 | 103  | 395  |
| LbrM10_V2.0800 | <i>L. braziliensis</i> | 94  | 397  | 490  |



|                |                        |      |      |      |
|----------------|------------------------|------|------|------|
| LbrM10_V2.0800 | <i>L. braziliensis</i> | 332  | 495  | 826  |
| LbrM10_V2.0800 | <i>L. braziliensis</i> | 110  | 862  | 971  |
| LbrM10_V2.0800 | <i>L. braziliensis</i> | 215  | 1000 | 1214 |
| LbrM10_V2.0800 | <i>L. braziliensis</i> | 135  | 1241 | 1375 |
| LbrM10_V2.0800 | <i>L. braziliensis</i> | 416  | 1385 | 1800 |
| LbrM10_V2.0810 | <i>L. braziliensis</i> | 112  | 65   | 176  |
| LbrM10_V2.0820 | <i>L. braziliensis</i> | 61   | 290  | 350  |
| LbrM10_V2.0820 | <i>L. braziliensis</i> | 41   | 583  | 623  |
| LbrM10_V2.0820 | <i>L. braziliensis</i> | 69   | 898  | 966  |
| LbrM10_V2.0820 | <i>L. braziliensis</i> | 65   | 1274 | 1338 |
| LbrM10_V2.0820 | <i>L. braziliensis</i> | 40   | 1381 | 1420 |
| LbrM10_V2.0820 | <i>L. braziliensis</i> | 41   | 1603 | 1643 |
| LbrM10_V2.0830 | <i>L. braziliensis</i> | 253  | 113  | 365  |
| LbrM10_V2.0830 | <i>L. braziliensis</i> | 64   | 441  | 504  |
| LbrM10_V2.0830 | <i>L. braziliensis</i> | 107  | 798  | 904  |
| LbrM10_V2.0840 | <i>L. braziliensis</i> | 42   | 34   | 75   |
| LbrM10_V2.0850 | <i>L. braziliensis</i> | 68   | 78   | 145  |
| LbrM10_V2.0860 | <i>L. braziliensis</i> | 112  | 1    | 112  |
| LbrM10_V2.0860 | <i>L. braziliensis</i> | 99   | 140  | 238  |
| LbrM10_V2.0860 | <i>L. braziliensis</i> | 60   | 299  | 358  |
| LbrM10_V2.0860 | <i>L. braziliensis</i> | 48   | 455  | 502  |
| LbrM10_V2.0870 | <i>L. braziliensis</i> | 91   | 103  | 193  |
| LbrM10_V2.0870 | <i>L. braziliensis</i> | 71   | 227  | 297  |
| LbrM10_V2.0870 | <i>L. braziliensis</i> | 71   | 227  | 297  |
| LbrM10_V2.0890 | <i>L. braziliensis</i> | 221  | 1    | 221  |
| LbrM10_V2.0900 | <i>L. braziliensis</i> | 76   | 64   | 139  |
| LbrM10_V2.0900 | <i>L. braziliensis</i> | 253  | 320  | 572  |
| LbrM10_V2.0900 | <i>L. braziliensis</i> | 364  | 899  | 1262 |
| LbrM10_V2.0910 | <i>L. braziliensis</i> | 60   | 197  | 256  |
| LbrM10_V2.0910 | <i>L. braziliensis</i> | 82   | 688  | 769  |
| LbrM10_V2.0910 | <i>L. braziliensis</i> | 61   | 999  | 1059 |
| LbrM10_V2.0910 | <i>L. braziliensis</i> | 467  | 1376 | 1842 |
| LbrM10_V2.0920 | <i>L. braziliensis</i> | 151  | 1    | 151  |
| LbrM10_V2.0920 | <i>L. braziliensis</i> | 44   | 357  | 400  |
| LbrM10_V2.0930 | <i>L. braziliensis</i> | 1160 | 1    | 1160 |
| LbrM10_V2.0930 | <i>L. braziliensis</i> | 42   | 1167 | 1208 |
| LbrM10_V2.0930 | <i>L. braziliensis</i> | 70   | 1341 | 1410 |
| LbrM10_V2.0940 | <i>L. braziliensis</i> | 52   | 64   | 115  |
| LbrM10_V2.0960 | <i>L. braziliensis</i> | 55   | 67   | 121  |
| LbrM10_V2.1000 | <i>L. braziliensis</i> | 44   | 168  | 211  |
| LbrM10_V2.1000 | <i>L. braziliensis</i> | 48   | 253  | 300  |
| LbrM10_V2.1000 | <i>L. braziliensis</i> | 470  | 553  | 1022 |
| LbrM10_V2.1000 | <i>L. braziliensis</i> | 114  | 1164 | 1277 |
| LbrM10_V2.1000 | <i>L. braziliensis</i> | 40   | 1360 | 1399 |
| LbrM10_V2.1000 | <i>L. braziliensis</i> | 56   | 1428 | 1483 |
| LbrM10_V2.1030 | <i>L. braziliensis</i> | 200  | 624  | 823  |
| LbrM10_V2.1030 | <i>L. braziliensis</i> | 44   | 865  | 908  |

|                |                        |     |      |      |
|----------------|------------------------|-----|------|------|
| LbrM10_V2.1030 | <i>L. braziliensis</i> | 112 | 914  | 1025 |
| LbrM10_V2.1030 | <i>L. braziliensis</i> | 147 | 1090 | 1236 |
| LbrM10_V2.1030 | <i>L. braziliensis</i> | 169 | 1311 | 1479 |
| LbrM10_V2.1030 | <i>L. braziliensis</i> | 218 | 1520 | 1737 |
| LbrM10_V2.1040 | <i>L. braziliensis</i> | 99  | 226  | 324  |
| LbrM10_V2.1040 | <i>L. braziliensis</i> | 400 | 332  | 731  |
| LbrM10_V2.1040 | <i>L. braziliensis</i> | 169 | 939  | 1107 |
| LbrM10_V2.1050 | <i>L. braziliensis</i> | 343 | 68   | 410  |
| LbrM10_V2.1050 | <i>L. braziliensis</i> | 174 | 469  | 642  |
| LbrM10_V2.1050 | <i>L. braziliensis</i> | 231 | 721  | 951  |
| LbrM10_V2.1050 | <i>L. braziliensis</i> | 114 | 958  | 1071 |
| LbrM10_V2.1050 | <i>L. braziliensis</i> | 68  | 1089 | 1156 |
| LbrM10_V2.1050 | <i>L. braziliensis</i> | 89  | 1197 | 1285 |
| LbrM10_V2.1050 | <i>L. braziliensis</i> | 40  | 1366 | 1405 |
| LbrM10_V2.1050 | <i>L. braziliensis</i> | 111 | 1454 | 1564 |
| LbrM10_V2.1050 | <i>L. braziliensis</i> | 150 | 1589 | 1738 |
| LbrM10_V2.1050 | <i>L. braziliensis</i> | 66  | 1794 | 1859 |
| LbrM10_V2.1060 | <i>L. braziliensis</i> | 87  | 1    | 87   |
| LbrM10_V2.1060 | <i>L. braziliensis</i> | 114 | 252  | 365  |
| LbrM10_V2.1060 | <i>L. braziliensis</i> | 215 | 582  | 796  |
| LbrM10_V2.1100 | <i>L. braziliensis</i> | 74  | 51   | 124  |
| LbrM10_V2.1120 | <i>L. braziliensis</i> | 77  | 1    | 77   |
| LbrM10_V2.1130 | <i>L. braziliensis</i> | 179 | 1    | 179  |
| LbrM10_V2.1130 | <i>L. braziliensis</i> | 74  | 317  | 390  |
| LbrM10_V2.1140 | <i>L. braziliensis</i> | 142 | 175  | 316  |
| LbrM10_V2.1140 | <i>L. braziliensis</i> | 86  | 586  | 671  |
| LbrM10_V2.1140 | <i>L. braziliensis</i> | 48  | 749  | 796  |
| LbrM10_V2.1140 | <i>L. braziliensis</i> | 42  | 993  | 1034 |
| LbrM10_V2.1150 | <i>L. braziliensis</i> | 59  | 68   | 126  |
| LbrM10_V2.1150 | <i>L. braziliensis</i> | 74  | 143  | 216  |
| LbrM10_V2.1150 | <i>L. braziliensis</i> | 74  | 143  | 216  |
| LbrM10_V2.1160 | <i>L. braziliensis</i> | 63  | 234  | 296  |
| LbrM10_V2.1170 | <i>L. braziliensis</i> | 117 | 1    | 117  |
| LbrM10_V2.1170 | <i>L. braziliensis</i> | 307 | 214  | 520  |
| LbrM10_V2.1180 | <i>L. braziliensis</i> | 114 | 1    | 114  |
| LbrM10_V2.1180 | <i>L. braziliensis</i> | 56  | 118  | 173  |
| LbrM10_V2.1180 | <i>L. braziliensis</i> | 71  | 397  | 467  |
| LbrM10_V2.1220 | <i>L. braziliensis</i> | 143 | 161  | 303  |
| LbrM10_V2.1220 | <i>L. braziliensis</i> | 185 | 335  | 519  |
| LbrM10_V2.1240 | <i>L. braziliensis</i> | 104 | 655  | 758  |
| LbrM10_V2.1240 | <i>L. braziliensis</i> | 48  | 1071 | 1118 |
| LbrM10_V2.1250 | <i>L. braziliensis</i> | 56  | 202  | 257  |
| LbrM10_V2.1260 | <i>L. braziliensis</i> | 423 | 58   | 480  |
| LbrM10_V2.1270 | <i>L. braziliensis</i> | 40  | 178  | 217  |
| LbrM10_V2.1300 | <i>L. braziliensis</i> | 345 | 1    | 345  |
| LbrM10_V2.1310 | <i>L. braziliensis</i> | 126 | 65   | 190  |
| LbrM10_V2.1330 | <i>L. braziliensis</i> | 68  | 1    | 68   |

|                |                        |     |      |      |
|----------------|------------------------|-----|------|------|
| LbrM10_V2.1330 | <i>L. braziliensis</i> | 223 | 292  | 514  |
| LbrM10_V2.1340 | <i>L. braziliensis</i> | 49  | 258  | 306  |
| LbrM10_V2.1450 | <i>L. braziliensis</i> | 60  | 254  | 313  |
| LbrM10_V2.1480 | <i>L. braziliensis</i> | 47  | 77   | 123  |
| LbrM10_V2.1480 | <i>L. braziliensis</i> | 60  | 268  | 327  |
| LbrM10_V2.1480 | <i>L. braziliensis</i> | 55  | 390  | 444  |
| LbrM10_V2.1490 | <i>L. braziliensis</i> | 55  | 75   | 129  |
| LbrM10_V2.1490 | <i>L. braziliensis</i> | 54  | 174  | 227  |
| LbrM10_V2.1490 | <i>L. braziliensis</i> | 79  | 311  | 389  |
| LbrM10_V2.1500 | <i>L. braziliensis</i> | 207 | 1    | 207  |
| LbrM10_V2.1500 | <i>L. braziliensis</i> | 97  | 221  | 317  |
| LbrM10_V2.1530 | <i>L. braziliensis</i> | 61  | 1    | 61   |
| LbrM10_V2.1530 | <i>L. braziliensis</i> | 55  | 68   | 122  |
| LbrM10_V2.1530 | <i>L. braziliensis</i> | 55  | 68   | 122  |
| LbrM10_V2.1550 | <i>L. braziliensis</i> | 173 | 1    | 173  |
| LbrM10_V2.1570 | <i>L. braziliensis</i> | 44  | 57   | 100  |
| LbrM10_V2.1590 | <i>L. braziliensis</i> | 143 | 1    | 143  |
| LbrM10_V2.1610 | <i>L. braziliensis</i> | 44  | 57   | 100  |
| LbrM10_V2.1640 | <i>L. braziliensis</i> | 150 | 1    | 150  |
| LbrM10_V2.1640 | <i>L. braziliensis</i> | 42  | 590  | 631  |
| LbrM10_V2.1650 | <i>L. braziliensis</i> | 44  | 57   | 100  |
| LbrM11_V2.0010 | <i>L. braziliensis</i> | 93  | 90   | 182  |
| LbrM11_V2.0010 | <i>L. braziliensis</i> | 89  | 511  | 599  |
| LbrM11_V2.0010 | <i>L. braziliensis</i> | 77  | 1004 | 1080 |
| LbrM11_V2.0020 | <i>L. braziliensis</i> | 156 | 1    | 156  |
| LbrM11_V2.0020 | <i>L. braziliensis</i> | 48  | 245  | 292  |
| LbrM11_V2.0020 | <i>L. braziliensis</i> | 57  | 495  | 551  |
| LbrM11_V2.0020 | <i>L. braziliensis</i> | 81  | 866  | 946  |
| LbrM11_V2.0020 | <i>L. braziliensis</i> | 99  | 977  | 1075 |
| LbrM11_V2.0030 | <i>L. braziliensis</i> | 78  | 74   | 151  |
| LbrM11_V2.0030 | <i>L. braziliensis</i> | 90  | 347  | 436  |
| LbrM11_V2.0040 | <i>L. braziliensis</i> | 46  | 208  | 253  |
| LbrM11_V2.0050 | <i>L. braziliensis</i> | 101 | 58   | 158  |
| LbrM11_V2.0050 | <i>L. braziliensis</i> | 70  | 317  | 386  |
| LbrM11_V2.0060 | <i>L. braziliensis</i> | 137 | 1    | 137  |
| LbrM11_V2.0060 | <i>L. braziliensis</i> | 383 | 160  | 542  |
| LbrM11_V2.0070 | <i>L. braziliensis</i> | 169 | 1    | 169  |
| LbrM11_V2.0070 | <i>L. braziliensis</i> | 207 | 442  | 648  |
| LbrM11_V2.0070 | <i>L. braziliensis</i> | 62  | 839  | 900  |
| LbrM11_V2.0070 | <i>L. braziliensis</i> | 46  | 983  | 1028 |
| LbrM11_V2.0080 | <i>L. braziliensis</i> | 159 | 1    | 159  |
| LbrM11_V2.0080 | <i>L. braziliensis</i> | 85  | 554  | 638  |
| LbrM11_V2.0080 | <i>L. braziliensis</i> | 421 | 661  | 1081 |
| LbrM11_V2.0090 | <i>L. braziliensis</i> | 118 | 183  | 300  |
| LbrM11_V2.0090 | <i>L. braziliensis</i> | 42  | 475  | 516  |
| LbrM11_V2.0090 | <i>L. braziliensis</i> | 42  | 475  | 516  |
| LbrM11_V2.0100 | <i>L. braziliensis</i> | 42  | 391  | 432  |

|                |                        |     |      |      |
|----------------|------------------------|-----|------|------|
| LbrM11_V2.0100 | <i>L. braziliensis</i> | 42  | 490  | 531  |
| LbrM11_V2.0100 | <i>L. braziliensis</i> | 42  | 490  | 531  |
| LbrM11_V2.0110 | <i>L. braziliensis</i> | 74  | 37   | 110  |
| LbrM11_V2.0110 | <i>L. braziliensis</i> | 63  | 400  | 462  |
| LbrM11_V2.0110 | <i>L. braziliensis</i> | 41  | 603  | 643  |
| LbrM11_V2.0120 | <i>L. braziliensis</i> | 423 | 183  | 605  |
| LbrM11_V2.0130 | <i>L. braziliensis</i> | 126 | 1    | 126  |
| LbrM11_V2.0130 | <i>L. braziliensis</i> | 49  | 169  | 217  |
| LbrM11_V2.0130 | <i>L. braziliensis</i> | 54  | 462  | 515  |
| LbrM11_V2.0130 | <i>L. braziliensis</i> | 64  | 587  | 650  |
| LbrM11_V2.0130 | <i>L. braziliensis</i> | 44  | 691  | 734  |
| LbrM11_V2.0140 | <i>L. braziliensis</i> | 55  | 86   | 140  |
| LbrM11_V2.0150 | <i>L. braziliensis</i> | 57  | 1    | 57   |
| LbrM11_V2.0150 | <i>L. braziliensis</i> | 105 | 82   | 186  |
| LbrM11_V2.0150 | <i>L. braziliensis</i> | 40  | 295  | 334  |
| LbrM11_V2.0160 | <i>L. braziliensis</i> | 53  | 1    | 53   |
| LbrM11_V2.0190 | <i>L. braziliensis</i> | 57  | 1    | 57   |
| LbrM11_V2.0190 | <i>L. braziliensis</i> | 46  | 267  | 312  |
| LbrM11_V2.0190 | <i>L. braziliensis</i> | 46  | 267  | 312  |
| LbrM11_V2.0210 | <i>L. braziliensis</i> | 151 | 101  | 251  |
| LbrM11_V2.0220 | <i>L. braziliensis</i> | 184 | 93   | 276  |
| LbrM11_V2.0220 | <i>L. braziliensis</i> | 127 | 394  | 520  |
| LbrM11_V2.0220 | <i>L. braziliensis</i> | 101 | 559  | 659  |
| LbrM11_V2.0230 | <i>L. braziliensis</i> | 59  | 1    | 59   |
| LbrM11_V2.0230 | <i>L. braziliensis</i> | 217 | 464  | 680  |
| LbrM11_V2.0240 | <i>L. braziliensis</i> | 149 | 1    | 149  |
| LbrM11_V2.0240 | <i>L. braziliensis</i> | 171 | 194  | 364  |
| LbrM11_V2.0240 | <i>L. braziliensis</i> | 170 | 422  | 591  |
| LbrM11_V2.0240 | <i>L. braziliensis</i> | 73  | 1139 | 1211 |
| LbrM11_V2.0250 | <i>L. braziliensis</i> | 99  | 34   | 132  |
| LbrM11_V2.0250 | <i>L. braziliensis</i> | 41  | 442  | 482  |
| LbrM11_V2.0260 | <i>L. braziliensis</i> | 75  | 1    | 75   |
| LbrM11_V2.0260 | <i>L. braziliensis</i> | 80  | 194  | 273  |
| LbrM11_V2.0260 | <i>L. braziliensis</i> | 40  | 496  | 535  |
| LbrM11_V2.0270 | <i>L. braziliensis</i> | 311 | 97   | 407  |
| LbrM11_V2.0280 | <i>L. braziliensis</i> | 55  | 117  | 171  |
| LbrM11_V2.0280 | <i>L. braziliensis</i> | 40  | 473  | 512  |
| LbrM11_V2.0280 | <i>L. braziliensis</i> | 40  | 473  | 512  |
| LbrM11_V2.0300 | <i>L. braziliensis</i> | 55  | 265  | 319  |
| LbrM11_V2.0310 | <i>L. braziliensis</i> | 42  | 1    | 42   |
| LbrM11_V2.0310 | <i>L. braziliensis</i> | 56  | 344  | 399  |
| LbrM11_V2.0310 | <i>L. braziliensis</i> | 56  | 344  | 399  |
| LbrM11_V2.0320 | <i>L. braziliensis</i> | 129 | 242  | 370  |
| LbrM11_V2.0340 | <i>L. braziliensis</i> | 84  | 1    | 84   |
| LbrM11_V2.0340 | <i>L. braziliensis</i> | 159 | 126  | 284  |
| LbrM11_V2.0340 | <i>L. braziliensis</i> | 135 | 293  | 427  |
| LbrM11_V2.0340 | <i>L. braziliensis</i> | 47  | 445  | 491  |

|                |                        |     |      |      |
|----------------|------------------------|-----|------|------|
| LbrM11_V2.0340 | <i>L. braziliensis</i> | 89  | 530  | 618  |
| LbrM11_V2.0350 | <i>L. braziliensis</i> | 99  | 1    | 99   |
| LbrM11_V2.0350 | <i>L. braziliensis</i> | 80  | 134  | 213  |
| LbrM11_V2.0350 | <i>L. braziliensis</i> | 75  | 708  | 782  |
| LbrM11_V2.0350 | <i>L. braziliensis</i> | 40  | 863  | 902  |
| LbrM11_V2.0350 | <i>L. braziliensis</i> | 136 | 937  | 1072 |
| LbrM11_V2.0360 | <i>L. braziliensis</i> | 69  | 1    | 69   |
| LbrM11_V2.0360 | <i>L. braziliensis</i> | 40  | 259  | 298  |
| LbrM11_V2.0360 | <i>L. braziliensis</i> | 40  | 259  | 298  |
| LbrM11_V2.0380 | <i>L. braziliensis</i> | 192 | 58   | 249  |
| LbrM11_V2.0380 | <i>L. braziliensis</i> | 41  | 256  | 296  |
| LbrM11_V2.0380 | <i>L. braziliensis</i> | 204 | 407  | 610  |
| LbrM11_V2.0390 | <i>L. braziliensis</i> | 211 | 24   | 234  |
| LbrM11_V2.0390 | <i>L. braziliensis</i> | 100 | 261  | 360  |
| LbrM11_V2.0390 | <i>L. braziliensis</i> | 245 | 379  | 623  |
| LbrM11_V2.0390 | <i>L. braziliensis</i> | 128 | 627  | 754  |
| LbrM11_V2.0390 | <i>L. braziliensis</i> | 63  | 792  | 854  |
| LbrM11_V2.0390 | <i>L. braziliensis</i> | 93  | 1015 | 1107 |
| LbrM11_V2.0420 | <i>L. braziliensis</i> | 69  | 1    | 69   |
| LbrM11_V2.0420 | <i>L. braziliensis</i> | 88  | 72   | 159  |
| LbrM11_V2.0420 | <i>L. braziliensis</i> | 56  | 230  | 285  |
| LbrM11_V2.0420 | <i>L. braziliensis</i> | 218 | 291  | 508  |
| LbrM11_V2.0420 | <i>L. braziliensis</i> | 60  | 573  | 632  |
| LbrM11_V2.0420 | <i>L. braziliensis</i> | 59  | 661  | 719  |
| LbrM11_V2.0420 | <i>L. braziliensis</i> | 109 | 826  | 934  |
| LbrM11_V2.0420 | <i>L. braziliensis</i> | 63  | 964  | 1026 |
| LbrM11_V2.0420 | <i>L. braziliensis</i> | 80  | 1168 | 1247 |
| LbrM11_V2.0420 | <i>L. braziliensis</i> | 59  | 1285 | 1343 |
| LbrM11_V2.0420 | <i>L. braziliensis</i> | 239 | 1355 | 1593 |
| LbrM11_V2.0420 | <i>L. braziliensis</i> | 42  | 1621 | 1662 |
| LbrM11_V2.0430 | <i>L. braziliensis</i> | 59  | 310  | 368  |
| LbrM11_V2.0440 | <i>L. braziliensis</i> | 44  | 313  | 356  |
| LbrM11_V2.0440 | <i>L. braziliensis</i> | 41  | 613  | 653  |
| LbrM11_V2.0470 | <i>L. braziliensis</i> | 44  | 532  | 575  |
| LbrM11_V2.0490 | <i>L. braziliensis</i> | 90  | 43   | 132  |
| LbrM11_V2.0490 | <i>L. braziliensis</i> | 54  | 212  | 265  |
| LbrM11_V2.0490 | <i>L. braziliensis</i> | 54  | 212  | 265  |
| LbrM11_V2.0500 | <i>L. braziliensis</i> | 76  | 1    | 76   |
| LbrM11_V2.0500 | <i>L. braziliensis</i> | 179 | 116  | 294  |
| LbrM11_V2.0500 | <i>L. braziliensis</i> | 77  | 336  | 412  |
| LbrM11_V2.0500 | <i>L. braziliensis</i> | 53  | 414  | 466  |
| LbrM11_V2.0500 | <i>L. braziliensis</i> | 84  | 472  | 555  |
| LbrM11_V2.0510 | <i>L. braziliensis</i> | 207 | 240  | 446  |
| LbrM11_V2.0510 | <i>L. braziliensis</i> | 106 | 533  | 638  |
| LbrM11_V2.0520 | <i>L. braziliensis</i> | 158 | 44   | 201  |
| LbrM11_V2.0520 | <i>L. braziliensis</i> | 96  | 318  | 413  |
| LbrM11_V2.0520 | <i>L. braziliensis</i> | 79  | 534  | 612  |

|                |                        |     |      |      |
|----------------|------------------------|-----|------|------|
| LbrM11_V2.0520 | <i>L. braziliensis</i> | 288 | 723  | 1010 |
| LbrM11_V2.0520 | <i>L. braziliensis</i> | 250 | 1040 | 1289 |
| LbrM11_V2.0530 | <i>L. braziliensis</i> | 57  | 1    | 57   |
| LbrM11_V2.0530 | <i>L. braziliensis</i> | 40  | 189  | 228  |
| LbrM11_V2.0530 | <i>L. braziliensis</i> | 87  | 358  | 444  |
| LbrM11_V2.0540 | <i>L. braziliensis</i> | 112 | 88   | 199  |
| LbrM11_V2.0550 | <i>L. braziliensis</i> | 93  | 73   | 165  |
| LbrM11_V2.0560 | <i>L. braziliensis</i> | 93  | 73   | 165  |
| LbrM11_V2.0570 | <i>L. braziliensis</i> | 93  | 79   | 171  |
| LbrM11_V2.0600 | <i>L. braziliensis</i> | 164 | 1    | 164  |
| LbrM11_V2.0600 | <i>L. braziliensis</i> | 257 | 206  | 462  |
| LbrM11_V2.0610 | <i>L. braziliensis</i> | 65  | 24   | 88   |
| LbrM11_V2.0610 | <i>L. braziliensis</i> | 84  | 131  | 214  |
| LbrM11_V2.0610 | <i>L. braziliensis</i> | 49  | 310  | 358  |
| LbrM11_V2.0610 | <i>L. braziliensis</i> | 82  | 441  | 522  |
| LbrM11_V2.0620 | <i>L. braziliensis</i> | 236 | 1    | 236  |
| LbrM11_V2.0620 | <i>L. braziliensis</i> | 337 | 244  | 580  |
| LbrM11_V2.0630 | <i>L. braziliensis</i> | 97  | 1    | 97   |
| LbrM11_V2.0630 | <i>L. braziliensis</i> | 92  | 150  | 241  |
| LbrM11_V2.0630 | <i>L. braziliensis</i> | 41  | 244  | 284  |
| LbrM11_V2.0630 | <i>L. braziliensis</i> | 43  | 292  | 334  |
| LbrM11_V2.0630 | <i>L. braziliensis</i> | 100 | 360  | 459  |
| LbrM11_V2.0630 | <i>L. braziliensis</i> | 72  | 791  | 862  |
| LbrM11_V2.0630 | <i>L. braziliensis</i> | 129 | 867  | 995  |
| LbrM11_V2.0630 | <i>L. braziliensis</i> | 398 | 1022 | 1419 |
| LbrM11_V2.0650 | <i>L. braziliensis</i> | 68  | 128  | 195  |
| LbrM11_V2.0660 | <i>L. braziliensis</i> | 61  | 318  | 378  |
| LbrM11_V2.0660 | <i>L. braziliensis</i> | 105 | 642  | 746  |
| LbrM11_V2.0660 | <i>L. braziliensis</i> | 70  | 983  | 1052 |
| LbrM11_V2.0660 | <i>L. braziliensis</i> | 92  | 1158 | 1249 |
| LbrM11_V2.0660 | <i>L. braziliensis</i> | 136 | 1534 | 1669 |
| LbrM11_V2.0670 | <i>L. braziliensis</i> | 57  | 192  | 248  |
| LbrM11_V2.0670 | <i>L. braziliensis</i> | 76  | 308  | 383  |
| LbrM11_V2.0670 | <i>L. braziliensis</i> | 222 | 477  | 698  |
| LbrM11_V2.0670 | <i>L. braziliensis</i> | 61  | 736  | 796  |
| LbrM11_V2.0670 | <i>L. braziliensis</i> | 605 | 886  | 1490 |
| LbrM11_V2.0690 | <i>L. braziliensis</i> | 55  | 35   | 89   |
| LbrM11_V2.0690 | <i>L. braziliensis</i> | 60  | 202  | 261  |
| LbrM11_V2.0690 | <i>L. braziliensis</i> | 40  | 412  | 451  |
| LbrM11_V2.0690 | <i>L. braziliensis</i> | 42  | 453  | 494  |
| LbrM11_V2.0690 | <i>L. braziliensis</i> | 48  | 961  | 1008 |
| LbrM11_V2.0700 | <i>L. braziliensis</i> | 105 | 86   | 190  |
| LbrM11_V2.0710 | <i>L. braziliensis</i> | 90  | 1    | 90   |
| LbrM11_V2.0710 | <i>L. braziliensis</i> | 253 | 94   | 346  |
| LbrM11_V2.0710 | <i>L. braziliensis</i> | 63  | 764  | 826  |
| LbrM11_V2.0710 | <i>L. braziliensis</i> | 56  | 914  | 969  |
| LbrM11_V2.0710 | <i>L. braziliensis</i> | 53  | 1020 | 1072 |

|                |                        |     |      |      |
|----------------|------------------------|-----|------|------|
| LbrM11_V2.0710 | <i>L. braziliensis</i> | 48  | 1120 | 1167 |
| LbrM11_V2.0710 | <i>L. braziliensis</i> | 155 | 1291 | 1445 |
| LbrM11_V2.0710 | <i>L. braziliensis</i> | 40  | 1486 | 1525 |
| LbrM11_V2.0720 | <i>L. braziliensis</i> | 75  | 38   | 112  |
| LbrM11_V2.0720 | <i>L. braziliensis</i> | 59  | 271  | 329  |
| LbrM11_V2.0720 | <i>L. braziliensis</i> | 165 | 425  | 589  |
| LbrM11_V2.0730 | <i>L. braziliensis</i> | 197 | 71   | 267  |
| LbrM11_V2.0730 | <i>L. braziliensis</i> | 106 | 272  | 377  |
| LbrM11_V2.0740 | <i>L. braziliensis</i> | 206 | 198  | 403  |
| LbrM11_V2.0740 | <i>L. braziliensis</i> | 513 | 425  | 937  |
| LbrM11_V2.0740 | <i>L. braziliensis</i> | 65  | 1056 | 1120 |
| LbrM11_V2.0740 | <i>L. braziliensis</i> | 63  | 1158 | 1220 |
| LbrM11_V2.0740 | <i>L. braziliensis</i> | 110 | 1279 | 1388 |
| LbrM11_V2.0740 | <i>L. braziliensis</i> | 50  | 1404 | 1453 |
| LbrM11_V2.0750 | <i>L. braziliensis</i> | 76  | 1    | 76   |
| LbrM11_V2.0750 | <i>L. braziliensis</i> | 60  | 85   | 144  |
| LbrM11_V2.0750 | <i>L. braziliensis</i> | 67  | 193  | 259  |
| LbrM11_V2.0750 | <i>L. braziliensis</i> | 81  | 279  | 359  |
| LbrM11_V2.0750 | <i>L. braziliensis</i> | 126 | 391  | 516  |
| LbrM11_V2.0780 | <i>L. braziliensis</i> | 61  | 42   | 102  |
| LbrM11_V2.0780 | <i>L. braziliensis</i> | 126 | 124  | 249  |
| LbrM11_V2.0780 | <i>L. braziliensis</i> | 41  | 400  | 440  |
| LbrM11_V2.0790 | <i>L. braziliensis</i> | 62  | 242  | 303  |
| LbrM11_V2.0790 | <i>L. braziliensis</i> | 64  | 700  | 763  |
| LbrM11_V2.0810 | <i>L. braziliensis</i> | 63  | 1    | 63   |
| LbrM11_V2.0810 | <i>L. braziliensis</i> | 72  | 296  | 367  |
| LbrM11_V2.0820 | <i>L. braziliensis</i> | 161 | 5    | 165  |
| LbrM11_V2.0820 | <i>L. braziliensis</i> | 41  | 195  | 235  |
| LbrM11_V2.0820 | <i>L. braziliensis</i> | 51  | 411  | 461  |
| LbrM11_V2.0820 | <i>L. braziliensis</i> | 297 | 750  | 1046 |
| LbrM11_V2.0820 | <i>L. braziliensis</i> | 132 | 1091 | 1222 |
| LbrM11_V2.0830 | <i>L. braziliensis</i> | 51  | 1    | 51   |
| LbrM11_V2.0840 | <i>L. braziliensis</i> | 136 | 1    | 136  |
| LbrM11_V2.0840 | <i>L. braziliensis</i> | 44  | 216  | 259  |
| LbrM11_V2.0840 | <i>L. braziliensis</i> | 413 | 307  | 719  |
| LbrM11_V2.0860 | <i>L. braziliensis</i> | 117 | 1    | 117  |
| LbrM11_V2.0860 | <i>L. braziliensis</i> | 62  | 235  | 296  |
| LbrM11_V2.0870 | <i>L. braziliensis</i> | 143 | 1    | 143  |
| LbrM11_V2.0890 | <i>L. braziliensis</i> | 65  | 83   | 147  |
| LbrM11_V2.0900 | <i>L. braziliensis</i> | 91  | 193  | 283  |
| LbrM11_V2.0910 | <i>L. braziliensis</i> | 65  | 57   | 121  |
| LbrM11_V2.0920 | <i>L. braziliensis</i> | 56  | 395  | 450  |
| LbrM11_V2.0920 | <i>L. braziliensis</i> | 41  | 459  | 499  |
| LbrM11_V2.0920 | <i>L. braziliensis</i> | 387 | 710  | 1096 |
| LbrM11_V2.0930 | <i>L. braziliensis</i> | 294 | 1    | 294  |
| LbrM11_V2.0940 | <i>L. braziliensis</i> | 41  | 358  | 398  |
| LbrM11_V2.0940 | <i>L. braziliensis</i> | 59  | 514  | 572  |

|                |                        |     |      |      |
|----------------|------------------------|-----|------|------|
| LbrM11_V2.0940 | <i>L. braziliensis</i> | 59  | 514  | 572  |
| LbrM11_V2.0960 | <i>L. braziliensis</i> | 52  | 1721 | 1772 |
| LbrM11_V2.0970 | <i>L. braziliensis</i> | 211 | 1    | 211  |
| LbrM11_V2.0980 | <i>L. braziliensis</i> | 72  | 310  | 381  |
| LbrM11_V2.1000 | <i>L. braziliensis</i> | 93  | 116  | 208  |
| LbrM11_V2.1010 | <i>L. braziliensis</i> | 144 | 1    | 144  |
| LbrM11_V2.1040 | <i>L. braziliensis</i> | 67  | 1    | 67   |
| LbrM11_V2.1040 | <i>L. braziliensis</i> | 75  | 1772 | 1846 |
| LbrM11_V2.1040 | <i>L. braziliensis</i> | 75  | 1772 | 1846 |
| LbrM11_V2.1050 | <i>L. braziliensis</i> | 67  | 1    | 67   |
| LbrM11_V2.1080 | <i>L. braziliensis</i> | 114 | 78   | 191  |
| LbrM11_V2.1080 | <i>L. braziliensis</i> | 74  | 220  | 293  |
| LbrM11_V2.1080 | <i>L. braziliensis</i> | 51  | 391  | 441  |
| LbrM11_V2.1080 | <i>L. braziliensis</i> | 122 | 633  | 754  |
| LbrM11_V2.1080 | <i>L. braziliensis</i> | 51  | 894  | 944  |
| LbrM11_V2.1080 | <i>L. braziliensis</i> | 52  | 1398 | 1449 |
| LbrM11_V2.1080 | <i>L. braziliensis</i> | 67  | 1483 | 1549 |
| LbrM11_V2.1080 | <i>L. braziliensis</i> | 69  | 1570 | 1638 |
| LbrM11_V2.1090 | <i>L. braziliensis</i> | 79  | 303  | 381  |
| LbrM11_V2.1110 | <i>L. braziliensis</i> | 51  | 1    | 51   |
| LbrM11_V2.1110 | <i>L. braziliensis</i> | 93  | 89   | 181  |
| LbrM11_V2.1110 | <i>L. braziliensis</i> | 93  | 89   | 181  |
| LbrM11_V2.1120 | <i>L. braziliensis</i> | 50  | 1    | 50   |
| LbrM11_V2.1140 | <i>L. braziliensis</i> | 46  | 1    | 46   |
| LbrM11_V2.1140 | <i>L. braziliensis</i> | 40  | 541  | 580  |
| LbrM11_V2.1140 | <i>L. braziliensis</i> | 40  | 541  | 580  |
| LbrM11_V2.1150 | <i>L. braziliensis</i> | 69  | 109  | 177  |
| LbrM11_V2.1150 | <i>L. braziliensis</i> | 43  | 326  | 368  |
| LbrM11_V2.1150 | <i>L. braziliensis</i> | 43  | 326  | 368  |
| LbrM11_V2.1160 | <i>L. braziliensis</i> | 173 | 204  | 376  |
| LbrM11_V2.1160 | <i>L. braziliensis</i> | 216 | 555  | 770  |
| LbrM11_V2.1160 | <i>L. braziliensis</i> | 175 | 784  | 958  |
| LbrM12_V2.0010 | <i>L. braziliensis</i> | 169 | 1    | 169  |
| LbrM12_V2.0010 | <i>L. braziliensis</i> | 57  | 249  | 305  |
| LbrM12_V2.0090 | <i>L. braziliensis</i> | 432 | 149  | 580  |
| LbrM12_V2.0130 | <i>L. braziliensis</i> | 70  | 134  | 203  |
| LbrM12_V2.0140 | <i>L. braziliensis</i> | 186 | 1    | 186  |
| LbrM12_V2.0140 | <i>L. braziliensis</i> | 462 | 201  | 662  |
| LbrM12_V2.0140 | <i>L. braziliensis</i> | 103 | 712  | 814  |
| LbrM12_V2.0150 | <i>L. braziliensis</i> | 223 | 42   | 264  |
| LbrM12_V2.0150 | <i>L. braziliensis</i> | 85  | 326  | 410  |
| LbrM12_V2.0150 | <i>L. braziliensis</i> | 154 | 420  | 573  |
| LbrM12_V2.0150 | <i>L. braziliensis</i> | 685 | 613  | 1297 |
| LbrM12_V2.0160 | <i>L. braziliensis</i> | 42  | 182  | 223  |
| LbrM12_V2.0160 | <i>L. braziliensis</i> | 85  | 269  | 353  |
| LbrM12_V2.0160 | <i>L. braziliensis</i> | 72  | 465  | 536  |
| LbrM12_V2.0170 | <i>L. braziliensis</i> | 78  | 280  | 357  |



|                |                        |     |      |      |
|----------------|------------------------|-----|------|------|
| LbrM12_V2.0180 | <i>L. braziliensis</i> | 326 | 1    | 326  |
| LbrM12_V2.0180 | <i>L. braziliensis</i> | 113 | 499  | 611  |
| LbrM12_V2.0180 | <i>L. braziliensis</i> | 58  | 774  | 831  |
| LbrM12_V2.0180 | <i>L. braziliensis</i> | 44  | 890  | 933  |
| LbrM12_V2.0180 | <i>L. braziliensis</i> | 137 | 1107 | 1243 |
| LbrM12_V2.0190 | <i>L. braziliensis</i> | 82  | 194  | 275  |
| LbrM12_V2.0200 | <i>L. braziliensis</i> | 98  | 118  | 215  |
| LbrM12_V2.0200 | <i>L. braziliensis</i> | 151 | 364  | 514  |
| LbrM12_V2.0200 | <i>L. braziliensis</i> | 151 | 364  | 514  |
| LbrM12_V2.0210 | <i>L. braziliensis</i> | 43  | 1    | 43   |
| LbrM12_V2.0210 | <i>L. braziliensis</i> | 52  | 107  | 158  |
| LbrM12_V2.0210 | <i>L. braziliensis</i> | 55  | 223  | 277  |
| LbrM12_V2.0210 | <i>L. braziliensis</i> | 87  | 380  | 466  |
| LbrM12_V2.0210 | <i>L. braziliensis</i> | 44  | 656  | 699  |
| LbrM12_V2.0210 | <i>L. braziliensis</i> | 68  | 911  | 978  |
| LbrM12_V2.0210 | <i>L. braziliensis</i> | 49  | 1158 | 1206 |
| LbrM12_V2.0210 | <i>L. braziliensis</i> | 52  | 1297 | 1348 |
| LbrM12_V2.0210 | <i>L. braziliensis</i> | 132 | 1486 | 1617 |
| LbrM12_V2.0220 | <i>L. braziliensis</i> | 191 | 1    | 191  |
| LbrM12_V2.0220 | <i>L. braziliensis</i> | 312 | 223  | 534  |
| LbrM12_V2.0220 | <i>L. braziliensis</i> | 557 | 543  | 1099 |
| LbrM12_V2.0250 | <i>L. braziliensis</i> | 69  | 1    | 69   |
| LbrM12_V2.0250 | <i>L. braziliensis</i> | 69  | 127  | 195  |
| LbrM12_V2.0250 | <i>L. braziliensis</i> | 235 | 238  | 472  |
| LbrM12_V2.0250 | <i>L. braziliensis</i> | 54  | 527  | 580  |
| LbrM12_V2.0250 | <i>L. braziliensis</i> | 45  | 769  | 813  |
| LbrM12_V2.0250 | <i>L. braziliensis</i> | 85  | 899  | 983  |
| LbrM12_V2.0250 | <i>L. braziliensis</i> | 64  | 1014 | 1077 |
| LbrM12_V2.0250 | <i>L. braziliensis</i> | 61  | 1107 | 1167 |
| LbrM12_V2.0250 | <i>L. braziliensis</i> | 41  | 1253 | 1293 |
| LbrM12_V2.0250 | <i>L. braziliensis</i> | 137 | 1329 | 1465 |
| LbrM12_V2.0260 | <i>L. braziliensis</i> | 54  | 196  | 249  |
| LbrM12_V2.0260 | <i>L. braziliensis</i> | 130 | 567  | 696  |
| LbrM12_V2.0270 | <i>L. braziliensis</i> | 61  | 142  | 202  |
| LbrM12_V2.0270 | <i>L. braziliensis</i> | 54  | 302  | 355  |
| LbrM12_V2.0270 | <i>L. braziliensis</i> | 139 | 642  | 780  |
| LbrM12_V2.0280 | <i>L. braziliensis</i> | 43  | 328  | 370  |
| LbrM12_V2.0280 | <i>L. braziliensis</i> | 71  | 428  | 498  |
| LbrM12_V2.0280 | <i>L. braziliensis</i> | 58  | 538  | 595  |
| LbrM12_V2.0280 | <i>L. braziliensis</i> | 58  | 723  | 780  |
| LbrM12_V2.0280 | <i>L. braziliensis</i> | 49  | 1094 | 1142 |
| LbrM12_V2.0280 | <i>L. braziliensis</i> | 53  | 1387 | 1439 |
| LbrM12_V2.0280 | <i>L. braziliensis</i> | 103 | 1459 | 1561 |
| LbrM12_V2.0280 | <i>L. braziliensis</i> | 137 | 1593 | 1729 |
| LbrM12_V2.0280 | <i>L. braziliensis</i> | 84  | 1734 | 1817 |
| LbrM12_V2.0280 | <i>L. braziliensis</i> | 71  | 1859 | 1929 |
| LbrM12_V2.0280 | <i>L. braziliensis</i> | 54  | 2020 | 2073 |

|                |                        |     |      |      |
|----------------|------------------------|-----|------|------|
| LbrM12_V2.0280 | <i>L. braziliensis</i> | 60  | 2077 | 2136 |
| LbrM12_V2.0280 | <i>L. braziliensis</i> | 68  | 2141 | 2208 |
| LbrM12_V2.0280 | <i>L. braziliensis</i> | 51  | 2443 | 2493 |
| LbrM12_V2.0280 | <i>L. braziliensis</i> | 76  | 2525 | 2600 |
| LbrM12_V2.0290 | <i>L. braziliensis</i> | 74  | 1    | 74   |
| LbrM12_V2.0290 | <i>L. braziliensis</i> | 64  | 134  | 197  |
| LbrM12_V2.0290 | <i>L. braziliensis</i> | 55  | 301  | 355  |
| LbrM12_V2.0300 | <i>L. braziliensis</i> | 46  | 32   | 77   |
| LbrM12_V2.0310 | <i>L. braziliensis</i> | 154 | 1    | 154  |
| LbrM12_V2.0310 | <i>L. braziliensis</i> | 657 | 172  | 828  |
| LbrM12_V2.0310 | <i>L. braziliensis</i> | 134 | 853  | 986  |
| LbrM12_V2.0310 | <i>L. braziliensis</i> | 81  | 1034 | 1114 |
| LbrM12_V2.0310 | <i>L. braziliensis</i> | 63  | 1256 | 1318 |
| LbrM12_V2.0310 | <i>L. braziliensis</i> | 116 | 1334 | 1449 |
| LbrM12_V2.0330 | <i>L. braziliensis</i> | 92  | 197  | 288  |
| LbrM12_V2.0330 | <i>L. braziliensis</i> | 68  | 355  | 422  |
| LbrM12_V2.0330 | <i>L. braziliensis</i> | 404 | 450  | 853  |
| LbrM12_V2.0330 | <i>L. braziliensis</i> | 68  | 901  | 968  |
| LbrM12_V2.0330 | <i>L. braziliensis</i> | 62  | 991  | 1052 |
| LbrM12_V2.0330 | <i>L. braziliensis</i> | 65  | 1239 | 1303 |
| LbrM12_V2.0340 | <i>L. braziliensis</i> | 95  | 117  | 211  |
| LbrM12_V2.0340 | <i>L. braziliensis</i> | 46  | 339  | 384  |
| LbrM12_V2.0340 | <i>L. braziliensis</i> | 74  | 560  | 633  |
| LbrM12_V2.0350 | <i>L. braziliensis</i> | 128 | 112  | 239  |
| LbrM12_V2.0350 | <i>L. braziliensis</i> | 122 | 302  | 423  |
| LbrM12_V2.0350 | <i>L. braziliensis</i> | 52  | 452  | 503  |
| LbrM12_V2.0350 | <i>L. braziliensis</i> | 41  | 518  | 558  |
| LbrM12_V2.0350 | <i>L. braziliensis</i> | 348 | 717  | 1064 |
| LbrM12_V2.0350 | <i>L. braziliensis</i> | 69  | 1084 | 1152 |
| LbrM12_V2.0350 | <i>L. braziliensis</i> | 52  | 1197 | 1248 |
| LbrM12_V2.0350 | <i>L. braziliensis</i> | 65  | 1276 | 1340 |
| LbrM12_V2.0350 | <i>L. braziliensis</i> | 68  | 1382 | 1449 |
| LbrM12_V2.0350 | <i>L. braziliensis</i> | 99  | 1477 | 1575 |
| LbrM12_V2.0350 | <i>L. braziliensis</i> | 45  | 1604 | 1648 |
| LbrM12_V2.0350 | <i>L. braziliensis</i> | 40  | 1828 | 1867 |
| LbrM12_V2.0350 | <i>L. braziliensis</i> | 99  | 1974 | 2072 |
| LbrM12_V2.0350 | <i>L. braziliensis</i> | 47  | 2157 | 2203 |
| LbrM12_V2.0350 | <i>L. braziliensis</i> | 124 | 2276 | 2399 |
| LbrM12_V2.0350 | <i>L. braziliensis</i> | 48  | 2404 | 2451 |
| LbrM12_V2.0350 | <i>L. braziliensis</i> | 223 | 2535 | 2757 |
| LbrM12_V2.0350 | <i>L. braziliensis</i> | 61  | 2777 | 2837 |
| LbrM12_V2.0350 | <i>L. braziliensis</i> | 133 | 2908 | 3040 |
| LbrM12_V2.0360 | <i>L. braziliensis</i> | 253 | 94   | 346  |
| LbrM12_V2.0360 | <i>L. braziliensis</i> | 116 | 396  | 511  |
| LbrM12_V2.0360 | <i>L. braziliensis</i> | 120 | 685  | 804  |
| LbrM12_V2.0360 | <i>L. braziliensis</i> | 66  | 851  | 916  |
| LbrM12_V2.0360 | <i>L. braziliensis</i> | 108 | 1096 | 1203 |

|                |                        |     |      |      |
|----------------|------------------------|-----|------|------|
| LbrM12_V2.0370 | <i>L. braziliensis</i> | 212 | 1    | 212  |
| LbrM12_V2.0370 | <i>L. braziliensis</i> | 100 | 237  | 336  |
| LbrM12_V2.0370 | <i>L. braziliensis</i> | 168 | 370  | 537  |
| LbrM12_V2.0370 | <i>L. braziliensis</i> | 56  | 547  | 602  |
| LbrM12_V2.0370 | <i>L. braziliensis</i> | 42  | 607  | 648  |
| LbrM12_V2.0370 | <i>L. braziliensis</i> | 594 | 687  | 1280 |
| LbrM12_V2.0370 | <i>L. braziliensis</i> | 87  | 1356 | 1442 |
| LbrM12_V2.0370 | <i>L. braziliensis</i> | 116 | 1446 | 1561 |
| LbrM12_V2.0370 | <i>L. braziliensis</i> | 262 | 1650 | 1911 |
| LbrM12_V2.0370 | <i>L. braziliensis</i> | 120 | 1948 | 2067 |
| LbrM12_V2.0380 | <i>L. braziliensis</i> | 78  | 223  | 300  |
| LbrM12_V2.0390 | <i>L. braziliensis</i> | 52  | 151  | 202  |
| LbrM12_V2.0390 | <i>L. braziliensis</i> | 81  | 222  | 302  |
| LbrM12_V2.0400 | <i>L. braziliensis</i> | 249 | 1    | 249  |
| LbrM12_V2.0400 | <i>L. braziliensis</i> | 122 | 275  | 396  |
| LbrM12_V2.0400 | <i>L. braziliensis</i> | 162 | 404  | 565  |
| LbrM12_V2.0400 | <i>L. braziliensis</i> | 336 | 591  | 926  |
| LbrM12_V2.0400 | <i>L. braziliensis</i> | 66  | 961  | 1026 |
| LbrM12_V2.0410 | <i>L. braziliensis</i> | 41  | 327  | 367  |
| LbrM12_V2.0430 | <i>L. braziliensis</i> | 68  | 1    | 68   |
| LbrM12_V2.0430 | <i>L. braziliensis</i> | 59  | 105  | 163  |
| LbrM12_V2.0430 | <i>L. braziliensis</i> | 133 | 174  | 306  |
| LbrM12_V2.0430 | <i>L. braziliensis</i> | 43  | 323  | 365  |
| LbrM12_V2.0450 | <i>L. braziliensis</i> | 62  | 59   | 120  |
| LbrM12_V2.0450 | <i>L. braziliensis</i> | 193 | 207  | 399  |
| LbrM12_V2.0450 | <i>L. braziliensis</i> | 106 | 509  | 614  |
| LbrM12_V2.0460 | <i>L. braziliensis</i> | 53  | 58   | 110  |
| LbrM12_V2.0460 | <i>L. braziliensis</i> | 55  | 142  | 196  |
| LbrM12_V2.0460 | <i>L. braziliensis</i> | 116 | 206  | 321  |
| LbrM12_V2.0460 | <i>L. braziliensis</i> | 63  | 381  | 443  |
| LbrM12_V2.0460 | <i>L. braziliensis</i> | 85  | 463  | 547  |
| LbrM12_V2.0460 | <i>L. braziliensis</i> | 150 | 574  | 723  |
| LbrM12_V2.0470 | <i>L. braziliensis</i> | 55  | 1    | 55   |
| LbrM12_V2.0470 | <i>L. braziliensis</i> | 70  | 64   | 133  |
| LbrM12_V2.0470 | <i>L. braziliensis</i> | 79  | 153  | 231  |
| LbrM12_V2.0470 | <i>L. braziliensis</i> | 77  | 278  | 354  |
| LbrM12_V2.0470 | <i>L. braziliensis</i> | 60  | 385  | 444  |
| LbrM12_V2.0470 | <i>L. braziliensis</i> | 101 | 558  | 658  |
| LbrM12_V2.0470 | <i>L. braziliensis</i> | 297 | 679  | 975  |
| LbrM12_V2.0500 | <i>L. braziliensis</i> | 61  | 50   | 110  |
| LbrM12_V2.0510 | <i>L. braziliensis</i> | 98  | 37   | 134  |
| LbrM12_V2.0510 | <i>L. braziliensis</i> | 188 | 143  | 330  |
| LbrM12_V2.0510 | <i>L. braziliensis</i> | 55  | 379  | 433  |
| LbrM12_V2.0510 | <i>L. braziliensis</i> | 142 | 498  | 639  |
| LbrM12_V2.0510 | <i>L. braziliensis</i> | 93  | 648  | 740  |
| LbrM12_V2.0510 | <i>L. braziliensis</i> | 76  | 754  | 829  |
| LbrM12_V2.0520 | <i>L. braziliensis</i> | 62  | 1    | 62   |

|                |                        |     |      |      |
|----------------|------------------------|-----|------|------|
| LbrM12_V2.0520 | <i>L. braziliensis</i> | 114 | 224  | 337  |
| LbrM12_V2.0520 | <i>L. braziliensis</i> | 401 | 624  | 1024 |
| LbrM12_V2.0520 | <i>L. braziliensis</i> | 45  | 1324 | 1368 |
| LbrM12_V2.0530 | <i>L. braziliensis</i> | 332 | 62   | 393  |
| LbrM12_V2.0530 | <i>L. braziliensis</i> | 355 | 420  | 774  |
| LbrM12_V2.0530 | <i>L. braziliensis</i> | 77  | 895  | 971  |
| LbrM12_V2.0540 | <i>L. braziliensis</i> | 111 | 53   | 163  |
| LbrM12_V2.0540 | <i>L. braziliensis</i> | 201 | 298  | 498  |
| LbrM12_V2.0540 | <i>L. braziliensis</i> | 93  | 539  | 631  |
| LbrM12_V2.0540 | <i>L. braziliensis</i> | 49  | 667  | 715  |
| LbrM12_V2.0540 | <i>L. braziliensis</i> | 132 | 830  | 961  |
| LbrM12_V2.0540 | <i>L. braziliensis</i> | 90  | 974  | 1063 |
| LbrM12_V2.0540 | <i>L. braziliensis</i> | 74  | 1103 | 1176 |
| LbrM12_V2.0540 | <i>L. braziliensis</i> | 52  | 1334 | 1385 |
| LbrM12_V2.0540 | <i>L. braziliensis</i> | 96  | 1393 | 1488 |
| LbrM12_V2.0550 | <i>L. braziliensis</i> | 110 | 1    | 110  |
| LbrM12_V2.0550 | <i>L. braziliensis</i> | 104 | 151  | 254  |
| LbrM12_V2.0560 | <i>L. braziliensis</i> | 329 | 1    | 329  |
| LbrM12_V2.0560 | <i>L. braziliensis</i> | 207 | 391  | 597  |
| LbrM12_V2.0570 | <i>L. braziliensis</i> | 78  | 1    | 78   |
| LbrM12_V2.0570 | <i>L. braziliensis</i> | 288 | 99   | 386  |
| LbrM12_V2.0570 | <i>L. braziliensis</i> | 144 | 496  | 639  |
| LbrM12_V2.0570 | <i>L. braziliensis</i> | 63  | 696  | 758  |
| LbrM12_V2.0580 | <i>L. braziliensis</i> | 283 | 47   | 329  |
| LbrM12_V2.0580 | <i>L. braziliensis</i> | 134 | 1091 | 1224 |
| LbrM12_V2.0580 | <i>L. braziliensis</i> | 57  | 1246 | 1302 |
| LbrM12_V2.0580 | <i>L. braziliensis</i> | 489 | 1306 | 1794 |
| LbrM12_V2.0590 | <i>L. braziliensis</i> | 129 | 31   | 159  |
| LbrM12_V2.0590 | <i>L. braziliensis</i> | 47  | 782  | 828  |
| LbrM12_V2.0590 | <i>L. braziliensis</i> | 62  | 1005 | 1066 |
| LbrM12_V2.0590 | <i>L. braziliensis</i> | 49  | 1147 | 1195 |
| LbrM12_V2.0590 | <i>L. braziliensis</i> | 263 | 1225 | 1487 |
| LbrM12_V2.0590 | <i>L. braziliensis</i> | 119 | 1492 | 1610 |
| LbrM12_V2.0590 | <i>L. braziliensis</i> | 71  | 1658 | 1728 |
| LbrM12_V2.0600 | <i>L. braziliensis</i> | 51  | 1    | 51   |
| LbrM12_V2.0600 | <i>L. braziliensis</i> | 50  | 263  | 312  |
| LbrM12_V2.0600 | <i>L. braziliensis</i> | 50  | 263  | 312  |
| LbrM12_V2.0610 | <i>L. braziliensis</i> | 165 | 183  | 347  |
| LbrM12_V2.0610 | <i>L. braziliensis</i> | 81  | 452  | 532  |
| LbrM12_V2.0610 | <i>L. braziliensis</i> | 160 | 816  | 975  |
| LbrM12_V2.0610 | <i>L. braziliensis</i> | 59  | 982  | 1040 |
| LbrM12_V2.0620 | <i>L. braziliensis</i> | 642 | 43   | 684  |
| LbrM12_V2.0620 | <i>L. braziliensis</i> | 70  | 689  | 758  |
| LbrM12_V2.0620 | <i>L. braziliensis</i> | 77  | 844  | 920  |
| LbrM12_V2.0620 | <i>L. braziliensis</i> | 400 | 942  | 1341 |
| LbrM12_V2.0640 | <i>L. braziliensis</i> | 81  | 216  | 296  |
| LbrM12_V2.0640 | <i>L. braziliensis</i> | 45  | 345  | 389  |

|                |                        |     |      |      |
|----------------|------------------------|-----|------|------|
| LbrM12_V2.0650 | <i>L. braziliensis</i> | 317 | 1    | 317  |
| LbrM12_V2.0650 | <i>L. braziliensis</i> | 101 | 330  | 430  |
| LbrM12_V2.0650 | <i>L. braziliensis</i> | 184 | 435  | 618  |
| LbrM12_V2.0680 | <i>L. braziliensis</i> | 47  | 319  | 365  |
| LbrM12_V2.0690 | <i>L. braziliensis</i> | 88  | 79   | 166  |
| LbrM12_V2.0700 | <i>L. braziliensis</i> | 57  | 114  | 170  |
| LbrM12_V2.0700 | <i>L. braziliensis</i> | 49  | 230  | 278  |
| LbrM12_V2.0700 | <i>L. braziliensis</i> | 57  | 390  | 446  |
| LbrM12_V2.0700 | <i>L. braziliensis</i> | 162 | 682  | 843  |
| LbrM12_V2.0730 | <i>L. braziliensis</i> | 116 | 36   | 151  |
| LbrM12_V2.0730 | <i>L. braziliensis</i> | 71  | 160  | 230  |
| LbrM12_V2.0730 | <i>L. braziliensis</i> | 105 | 347  | 451  |
| LbrM12_V2.0740 | <i>L. braziliensis</i> | 92  | 218  | 309  |
| LbrM12_V2.0740 | <i>L. braziliensis</i> | 115 | 325  | 439  |
| LbrM12_V2.0750 | <i>L. braziliensis</i> | 45  | 149  | 193  |
| LbrM12_V2.0750 | <i>L. braziliensis</i> | 81  | 306  | 386  |
| LbrM12_V2.0750 | <i>L. braziliensis</i> | 187 | 414  | 600  |
| LbrM12_V2.0750 | <i>L. braziliensis</i> | 212 | 653  | 864  |
| LbrM12_V2.0760 | <i>L. braziliensis</i> | 107 | 1    | 107  |
| LbrM12_V2.0760 | <i>L. braziliensis</i> | 46  | 233  | 278  |
| LbrM12_V2.0760 | <i>L. braziliensis</i> | 40  | 336  | 375  |
| LbrM12_V2.0770 | <i>L. braziliensis</i> | 50  | 1    | 50   |
| LbrM12_V2.0770 | <i>L. braziliensis</i> | 137 | 79   | 215  |
| LbrM12_V2.0770 | <i>L. braziliensis</i> | 99  | 254  | 352  |
| LbrM12_V2.0770 | <i>L. braziliensis</i> | 167 | 361  | 527  |
| LbrM12_V2.0770 | <i>L. braziliensis</i> | 144 | 560  | 703  |
| LbrM12_V2.0770 | <i>L. braziliensis</i> | 142 | 723  | 864  |
| LbrM12_V2.0770 | <i>L. braziliensis</i> | 231 | 900  | 1130 |
| LbrM12_V2.0770 | <i>L. braziliensis</i> | 58  | 1275 | 1332 |
| LbrM12_V2.0770 | <i>L. braziliensis</i> | 170 | 1424 | 1593 |
| LbrM12_V2.0780 | <i>L. braziliensis</i> | 63  | 32   | 94   |
| LbrM12_V2.0780 | <i>L. braziliensis</i> | 417 | 151  | 567  |
| LbrM12_V2.0780 | <i>L. braziliensis</i> | 103 | 627  | 729  |
| LbrM12_V2.0790 | <i>L. braziliensis</i> | 309 | 148  | 456  |
| LbrM12_V2.0790 | <i>L. braziliensis</i> | 149 | 459  | 607  |
| LbrM12_V2.0790 | <i>L. braziliensis</i> | 296 | 734  | 1029 |
| LbrM12_V2.0790 | <i>L. braziliensis</i> | 85  | 1033 | 1117 |
| LbrM12_V2.0820 | <i>L. braziliensis</i> | 47  | 386  | 432  |
| LbrM12_V2.0820 | <i>L. braziliensis</i> | 93  | 784  | 876  |
| LbrM12_V2.0820 | <i>L. braziliensis</i> | 93  | 784  | 876  |
| LbrM12_V2.0830 | <i>L. braziliensis</i> | 195 | 32   | 226  |
| LbrM12_V2.0830 | <i>L. braziliensis</i> | 419 | 277  | 695  |
| LbrM12_V2.0830 | <i>L. braziliensis</i> | 224 | 775  | 998  |
| LbrM12_V2.0840 | <i>L. braziliensis</i> | 260 | 262  | 521  |
| LbrM12_V2.0850 | <i>L. braziliensis</i> | 65  | 178  | 242  |
| LbrM12_V2.0850 | <i>L. braziliensis</i> | 207 | 510  | 716  |
| LbrM12_V2.0860 | <i>L. braziliensis</i> | 192 | 32   | 223  |

|                |                        |     |      |      |
|----------------|------------------------|-----|------|------|
| LbrM12_V2.0860 | <i>L. braziliensis</i> | 131 | 257  | 387  |
| LbrM12_V2.0860 | <i>L. braziliensis</i> | 93  | 472  | 564  |
| LbrM12_V2.0860 | <i>L. braziliensis</i> | 55  | 653  | 707  |
| LbrM12_V2.0860 | <i>L. braziliensis</i> | 49  | 815  | 863  |
| LbrM12_V2.0870 | <i>L. braziliensis</i> | 50  | 1    | 50   |
| LbrM12_V2.0870 | <i>L. braziliensis</i> | 62  | 165  | 226  |
| LbrM12_V2.0870 | <i>L. braziliensis</i> | 51  | 300  | 350  |
| LbrM12_V2.0870 | <i>L. braziliensis</i> | 47  | 414  | 460  |
| LbrM12_V2.0870 | <i>L. braziliensis</i> | 50  | 532  | 581  |
| LbrM12_V2.0870 | <i>L. braziliensis</i> | 106 | 1153 | 1258 |
| LbrM12_V2.0870 | <i>L. braziliensis</i> | 89  | 1346 | 1434 |
| LbrM12_V2.0880 | <i>L. braziliensis</i> | 51  | 1    | 51   |
| LbrM12_V2.0880 | <i>L. braziliensis</i> | 86  | 370  | 455  |
| LbrM12_V2.0880 | <i>L. braziliensis</i> | 86  | 370  | 455  |
| LbrM12_V2.0890 | <i>L. braziliensis</i> | 131 | 1    | 131  |
| LbrM12_V2.0890 | <i>L. braziliensis</i> | 350 | 164  | 513  |
| LbrM12_V2.0890 | <i>L. braziliensis</i> | 189 | 577  | 765  |
| LbrM12_V2.0890 | <i>L. braziliensis</i> | 107 | 784  | 890  |
| LbrM12_V2.0900 | <i>L. braziliensis</i> | 226 | 350  | 575  |
| LbrM12_V2.0900 | <i>L. braziliensis</i> | 352 | 990  | 1341 |
| LbrM12_V2.0900 | <i>L. braziliensis</i> | 45  | 1361 | 1405 |
| LbrM12_V2.0920 | <i>L. braziliensis</i> | 91  | 1    | 91   |
| LbrM12_V2.0920 | <i>L. braziliensis</i> | 40  | 215  | 254  |
| LbrM12_V2.0920 | <i>L. braziliensis</i> | 85  | 328  | 412  |
| LbrM12_V2.0920 | <i>L. braziliensis</i> | 75  | 551  | 625  |
| LbrM12_V2.0930 | <i>L. braziliensis</i> | 57  | 666  | 722  |
| LbrM12_V2.0930 | <i>L. braziliensis</i> | 178 | 901  | 1078 |
| LbrM12_V2.0930 | <i>L. braziliensis</i> | 45  | 1259 | 1303 |
| LbrM12_V2.0940 | <i>L. braziliensis</i> | 108 | 75   | 182  |
| LbrM12_V2.0950 | <i>L. braziliensis</i> | 61  | 1    | 61   |
| LbrM12_V2.0950 | <i>L. braziliensis</i> | 215 | 108  | 322  |
| LbrM12_V2.0950 | <i>L. braziliensis</i> | 164 | 357  | 520  |
| LbrM12_V2.0950 | <i>L. braziliensis</i> | 145 | 638  | 782  |
| LbrM12_V2.0960 | <i>L. braziliensis</i> | 191 | 40   | 230  |
| LbrM12_V2.0960 | <i>L. braziliensis</i> | 108 | 347  | 454  |
| LbrM12_V2.0960 | <i>L. braziliensis</i> | 78  | 595  | 672  |
| LbrM13_V2.0010 | <i>L. braziliensis</i> | 57  | 62   | 118  |
| LbrM13_V2.0030 | <i>L. braziliensis</i> | 48  | 1    | 48   |
| LbrM13_V2.0030 | <i>L. braziliensis</i> | 41  | 159  | 199  |
| LbrM13_V2.0030 | <i>L. braziliensis</i> | 41  | 159  | 199  |
| LbrM13_V2.0040 | <i>L. braziliensis</i> | 195 | 1    | 195  |
| LbrM13_V2.0060 | <i>L. braziliensis</i> | 149 | 1    | 149  |
| LbrM13_V2.0060 | <i>L. braziliensis</i> | 115 | 152  | 266  |
| LbrM13_V2.0060 | <i>L. braziliensis</i> | 134 | 276  | 409  |
| LbrM13_V2.0090 | <i>L. braziliensis</i> | 112 | 199  | 310  |
| LbrM13_V2.0100 | <i>L. braziliensis</i> | 45  | 32   | 76   |
| LbrM13_V2.0110 | <i>L. braziliensis</i> | 101 | 1    | 101  |

|                |                        |     |      |      |
|----------------|------------------------|-----|------|------|
| LbrM13_V2.0120 | <i>L. braziliensis</i> | 78  | 324  | 401  |
| LbrM13_V2.0120 | <i>L. braziliensis</i> | 142 | 443  | 584  |
| LbrM13_V2.0120 | <i>L. braziliensis</i> | 142 | 443  | 584  |
| LbrM13_V2.0130 | <i>L. braziliensis</i> | 65  | 61   | 125  |
| LbrM13_V2.0140 | <i>L. braziliensis</i> | 157 | 63   | 219  |
| LbrM13_V2.0160 | <i>L. braziliensis</i> | 70  | 503  | 572  |
| LbrM13_V2.0170 | <i>L. braziliensis</i> | 59  | 19   | 77   |
| LbrM13_V2.0170 | <i>L. braziliensis</i> | 56  | 380  | 435  |
| LbrM13_V2.0170 | <i>L. braziliensis</i> | 56  | 380  | 435  |
| LbrM13_V2.0180 | <i>L. braziliensis</i> | 50  | 67   | 116  |
| LbrM13_V2.0180 | <i>L. braziliensis</i> | 62  | 239  | 300  |
| LbrM13_V2.0210 | <i>L. braziliensis</i> | 56  | 93   | 148  |
| LbrM13_V2.0210 | <i>L. braziliensis</i> | 53  | 181  | 233  |
| LbrM13_V2.0210 | <i>L. braziliensis</i> | 53  | 181  | 233  |
| LbrM13_V2.0230 | <i>L. braziliensis</i> | 42  | 37   | 78   |
| LbrM13_V2.0230 | <i>L. braziliensis</i> | 57  | 865  | 921  |
| LbrM13_V2.0250 | <i>L. braziliensis</i> | 68  | 292  | 359  |
| LbrM13_V2.0250 | <i>L. braziliensis</i> | 122 | 366  | 487  |
| LbrM13_V2.0250 | <i>L. braziliensis</i> | 59  | 534  | 592  |
| LbrM13_V2.0270 | <i>L. braziliensis</i> | 42  | 80   | 121  |
| LbrM13_V2.0300 | <i>L. braziliensis</i> | 384 | 19   | 402  |
| LbrM13_V2.0300 | <i>L. braziliensis</i> | 152 | 405  | 556  |
| LbrM13_V2.0300 | <i>L. braziliensis</i> | 138 | 577  | 714  |
| LbrM13_V2.0310 | <i>L. braziliensis</i> | 54  | 225  | 278  |
| LbrM13_V2.0310 | <i>L. braziliensis</i> | 53  | 392  | 444  |
| LbrM13_V2.0310 | <i>L. braziliensis</i> | 53  | 392  | 444  |
| LbrM13_V2.0330 | <i>L. braziliensis</i> | 45  | 51   | 95   |
| LbrM13_V2.0340 | <i>L. braziliensis</i> | 169 | 1    | 169  |
| LbrM13_V2.0340 | <i>L. braziliensis</i> | 40  | 239  | 278  |
| LbrM13_V2.0350 | <i>L. braziliensis</i> | 98  | 1    | 98   |
| LbrM13_V2.0350 | <i>L. braziliensis</i> | 40  | 133  | 172  |
| LbrM13_V2.0350 | <i>L. braziliensis</i> | 132 | 263  | 394  |
| LbrM13_V2.0350 | <i>L. braziliensis</i> | 72  | 396  | 467  |
| LbrM13_V2.0350 | <i>L. braziliensis</i> | 61  | 518  | 578  |
| LbrM13_V2.0350 | <i>L. braziliensis</i> | 227 | 589  | 815  |
| LbrM13_V2.0350 | <i>L. braziliensis</i> | 145 | 822  | 966  |
| LbrM13_V2.0370 | <i>L. braziliensis</i> | 57  | 77   | 133  |
| LbrM13_V2.0370 | <i>L. braziliensis</i> | 155 | 182  | 336  |
| LbrM13_V2.0370 | <i>L. braziliensis</i> | 92  | 505  | 596  |
| LbrM13_V2.0380 | <i>L. braziliensis</i> | 53  | 146  | 198  |
| LbrM13_V2.0400 | <i>L. braziliensis</i> | 94  | 73   | 166  |
| LbrM13_V2.0400 | <i>L. braziliensis</i> | 67  | 413  | 479  |
| LbrM13_V2.0400 | <i>L. braziliensis</i> | 48  | 510  | 557  |
| LbrM13_V2.0400 | <i>L. braziliensis</i> | 159 | 624  | 782  |
| LbrM13_V2.0400 | <i>L. braziliensis</i> | 70  | 784  | 853  |
| LbrM13_V2.0400 | <i>L. braziliensis</i> | 87  | 875  | 961  |
| LbrM13_V2.0400 | <i>L. braziliensis</i> | 68  | 1121 | 1188 |

|                |                        |     |      |      |
|----------------|------------------------|-----|------|------|
| LbrM13_V2.0400 | <i>L. braziliensis</i> | 43  | 1227 | 1269 |
| LbrM13_V2.0400 | <i>L. braziliensis</i> | 61  | 1316 | 1376 |
| LbrM13_V2.0400 | <i>L. braziliensis</i> | 53  | 1403 | 1455 |
| LbrM13_V2.0420 | <i>L. braziliensis</i> | 116 | 1    | 116  |
| LbrM13_V2.0420 | <i>L. braziliensis</i> | 41  | 147  | 187  |
| LbrM13_V2.0420 | <i>L. braziliensis</i> | 41  | 147  | 187  |
| LbrM13_V2.0430 | <i>L. braziliensis</i> | 41  | 120  | 160  |
| LbrM13_V2.0440 | <i>L. braziliensis</i> | 187 | 1    | 187  |
| LbrM13_V2.0440 | <i>L. braziliensis</i> | 172 | 193  | 364  |
| LbrM13_V2.0450 | <i>L. braziliensis</i> | 131 | 60   | 190  |
| LbrM13_V2.0450 | <i>L. braziliensis</i> | 45  | 233  | 277  |
| LbrM13_V2.0460 | <i>L. braziliensis</i> | 41  | 773  | 813  |
| LbrM13_V2.0460 | <i>L. braziliensis</i> | 142 | 1115 | 1256 |
| LbrM13_V2.0470 | <i>L. braziliensis</i> | 160 | 93   | 252  |
| LbrM13_V2.0470 | <i>L. braziliensis</i> | 106 | 506  | 611  |
| LbrM13_V2.0480 | <i>L. braziliensis</i> | 61  | 569  | 629  |
| LbrM13_V2.0490 | <i>L. braziliensis</i> | 158 | 288  | 445  |
| LbrM13_V2.0500 | <i>L. braziliensis</i> | 119 | 1    | 119  |
| LbrM13_V2.0500 | <i>L. braziliensis</i> | 68  | 467  | 534  |
| LbrM13_V2.0510 | <i>L. braziliensis</i> | 99  | 1    | 99   |
| LbrM13_V2.0510 | <i>L. braziliensis</i> | 169 | 116  | 284  |
| LbrM13_V2.0510 | <i>L. braziliensis</i> | 193 | 321  | 513  |
| LbrM13_V2.0510 | <i>L. braziliensis</i> | 347 | 518  | 864  |
| LbrM13_V2.0520 | <i>L. braziliensis</i> | 248 | 1    | 248  |
| LbrM13_V2.0520 | <i>L. braziliensis</i> | 43  | 330  | 372  |
| LbrM13_V2.0520 | <i>L. braziliensis</i> | 49  | 528  | 576  |
| LbrM13_V2.0520 | <i>L. braziliensis</i> | 107 | 621  | 727  |
| LbrM13_V2.0520 | <i>L. braziliensis</i> | 55  | 776  | 830  |
| LbrM13_V2.0530 | <i>L. braziliensis</i> | 40  | 1    | 40   |
| LbrM13_V2.0530 | <i>L. braziliensis</i> | 293 | 112  | 404  |
| LbrM13_V2.0550 | <i>L. braziliensis</i> | 384 | 59   | 442  |
| LbrM13_V2.0550 | <i>L. braziliensis</i> | 230 | 636  | 865  |
| LbrM13_V2.0560 | <i>L. braziliensis</i> | 73  | 1    | 73   |
| LbrM13_V2.0570 | <i>L. braziliensis</i> | 168 | 1    | 168  |
| LbrM13_V2.0580 | <i>L. braziliensis</i> | 214 | 144  | 357  |
| LbrM13_V2.0580 | <i>L. braziliensis</i> | 295 | 520  | 814  |
| LbrM13_V2.0580 | <i>L. braziliensis</i> | 298 | 1088 | 1385 |
| LbrM13_V2.0580 | <i>L. braziliensis</i> | 65  | 1460 | 1524 |
| LbrM13_V2.0580 | <i>L. braziliensis</i> | 128 | 1604 | 1731 |
| LbrM13_V2.0580 | <i>L. braziliensis</i> | 99  | 1798 | 1896 |
| LbrM13_V2.0590 | <i>L. braziliensis</i> | 99  | 65   | 163  |
| LbrM13_V2.0590 | <i>L. braziliensis</i> | 47  | 212  | 258  |
| LbrM13_V2.0590 | <i>L. braziliensis</i> | 90  | 376  | 465  |
| LbrM13_V2.0600 | <i>L. braziliensis</i> | 102 | 204  | 305  |
| LbrM13_V2.0610 | <i>L. braziliensis</i> | 98  | 78   | 175  |
| LbrM13_V2.0610 | <i>L. braziliensis</i> | 74  | 193  | 266  |
| LbrM13_V2.0610 | <i>L. braziliensis</i> | 78  | 280  | 357  |



|                |                        |     |      |      |
|----------------|------------------------|-----|------|------|
| LbrM13_V2.0610 | <i>L. braziliensis</i> | 41  | 489  | 529  |
| LbrM13_V2.0610 | <i>L. braziliensis</i> | 81  | 584  | 664  |
| LbrM13_V2.0620 | <i>L. braziliensis</i> | 138 | 96   | 233  |
| LbrM13_V2.0630 | <i>L. braziliensis</i> | 41  | 64   | 104  |
| LbrM13_V2.0640 | <i>L. braziliensis</i> | 76  | 41   | 116  |
| LbrM13_V2.0640 | <i>L. braziliensis</i> | 125 | 143  | 267  |
| LbrM13_V2.0640 | <i>L. braziliensis</i> | 150 | 415  | 564  |
| LbrM13_V2.0640 | <i>L. braziliensis</i> | 196 | 596  | 791  |
| LbrM13_V2.0640 | <i>L. braziliensis</i> | 59  | 843  | 901  |
| LbrM13_V2.0650 | <i>L. braziliensis</i> | 108 | 1    | 108  |
| LbrM13_V2.0650 | <i>L. braziliensis</i> | 44  | 139  | 182  |
| LbrM13_V2.0650 | <i>L. braziliensis</i> | 171 | 199  | 369  |
| LbrM13_V2.0650 | <i>L. braziliensis</i> | 106 | 414  | 519  |
| LbrM13_V2.0650 | <i>L. braziliensis</i> | 308 | 551  | 858  |
| LbrM13_V2.0660 | <i>L. braziliensis</i> | 278 | 1    | 278  |
| LbrM13_V2.0660 | <i>L. braziliensis</i> | 84  | 369  | 452  |
| LbrM13_V2.0660 | <i>L. braziliensis</i> | 122 | 490  | 611  |
| LbrM13_V2.0660 | <i>L. braziliensis</i> | 156 | 638  | 793  |
| LbrM13_V2.0670 | <i>L. braziliensis</i> | 141 | 135  | 275  |
| LbrM13_V2.0680 | <i>L. braziliensis</i> | 47  | 135  | 181  |
| LbrM13_V2.0680 | <i>L. braziliensis</i> | 46  | 293  | 338  |
| LbrM13_V2.0680 | <i>L. braziliensis</i> | 46  | 293  | 338  |
| LbrM13_V2.0690 | <i>L. braziliensis</i> | 261 | 79   | 339  |
| LbrM13_V2.0690 | <i>L. braziliensis</i> | 236 | 454  | 689  |
| LbrM13_V2.0700 | <i>L. braziliensis</i> | 46  | 1    | 46   |
| LbrM13_V2.0700 | <i>L. braziliensis</i> | 81  | 90   | 170  |
| LbrM13_V2.0700 | <i>L. braziliensis</i> | 71  | 217  | 287  |
| LbrM13_V2.0710 | <i>L. braziliensis</i> | 120 | 76   | 195  |
| LbrM13_V2.0710 | <i>L. braziliensis</i> | 118 | 302  | 419  |
| LbrM13_V2.0710 | <i>L. braziliensis</i> | 136 | 466  | 601  |
| LbrM13_V2.0720 | <i>L. braziliensis</i> | 57  | 49   | 105  |
| LbrM13_V2.0720 | <i>L. braziliensis</i> | 348 | 185  | 532  |
| LbrM13_V2.0720 | <i>L. braziliensis</i> | 138 | 762  | 899  |
| LbrM13_V2.0730 | <i>L. braziliensis</i> | 54  | 1    | 54   |
| LbrM13_V2.0730 | <i>L. braziliensis</i> | 101 | 73   | 173  |
| LbrM13_V2.0730 | <i>L. braziliensis</i> | 50  | 180  | 229  |
| LbrM13_V2.0730 | <i>L. braziliensis</i> | 43  | 259  | 301  |
| LbrM13_V2.0730 | <i>L. braziliensis</i> | 109 | 414  | 522  |
| LbrM13_V2.0730 | <i>L. braziliensis</i> | 81  | 542  | 622  |
| LbrM13_V2.0730 | <i>L. braziliensis</i> | 148 | 787  | 934  |
| LbrM13_V2.0730 | <i>L. braziliensis</i> | 40  | 1003 | 1042 |
| LbrM13_V2.0730 | <i>L. braziliensis</i> | 63  | 1065 | 1127 |
| LbrM13_V2.0730 | <i>L. braziliensis</i> | 344 | 1230 | 1573 |
| LbrM13_V2.0750 | <i>L. braziliensis</i> | 50  | 18   | 67   |
| LbrM13_V2.0750 | <i>L. braziliensis</i> | 114 | 377  | 490  |
| LbrM13_V2.0760 | <i>L. braziliensis</i> | 91  | 222  | 312  |
| LbrM13_V2.0770 | <i>L. braziliensis</i> | 154 | 108  | 261  |

|                |                        |     |      |      |
|----------------|------------------------|-----|------|------|
| LbrM13_V2.0780 | <i>L. braziliensis</i> | 143 | 1    | 143  |
| LbrM13_V2.0780 | <i>L. braziliensis</i> | 50  | 217  | 266  |
| LbrM13_V2.0780 | <i>L. braziliensis</i> | 105 | 406  | 510  |
| LbrM13_V2.0790 | <i>L. braziliensis</i> | 44  | 119  | 162  |
| LbrM13_V2.0790 | <i>L. braziliensis</i> | 76  | 512  | 587  |
| LbrM13_V2.0790 | <i>L. braziliensis</i> | 83  | 818  | 900  |
| LbrM13_V2.0790 | <i>L. braziliensis</i> | 60  | 986  | 1045 |
| LbrM13_V2.0790 | <i>L. braziliensis</i> | 65  | 1067 | 1131 |
| LbrM13_V2.0790 | <i>L. braziliensis</i> | 47  | 1169 | 1215 |
| LbrM13_V2.0790 | <i>L. braziliensis</i> | 42  | 1608 | 1649 |
| LbrM13_V2.0800 | <i>L. braziliensis</i> | 365 | 1    | 365  |
| LbrM13_V2.0800 | <i>L. braziliensis</i> | 60  | 381  | 440  |
| LbrM13_V2.0810 | <i>L. braziliensis</i> | 69  | 1    | 69   |
| LbrM13_V2.0810 | <i>L. braziliensis</i> | 68  | 133  | 200  |
| LbrM13_V2.0810 | <i>L. braziliensis</i> | 125 | 228  | 352  |
| LbrM13_V2.0830 | <i>L. braziliensis</i> | 52  | 131  | 182  |
| LbrM13_V2.0830 | <i>L. braziliensis</i> | 46  | 463  | 508  |
| LbrM13_V2.0830 | <i>L. braziliensis</i> | 45  | 593  | 637  |
| LbrM13_V2.0860 | <i>L. braziliensis</i> | 48  | 297  | 344  |
| LbrM13_V2.0860 | <i>L. braziliensis</i> | 62  | 546  | 607  |
| LbrM13_V2.0860 | <i>L. braziliensis</i> | 176 | 713  | 888  |
| LbrM13_V2.0860 | <i>L. braziliensis</i> | 46  | 1122 | 1167 |
| LbrM13_V2.0860 | <i>L. braziliensis</i> | 43  | 1356 | 1398 |
| LbrM13_V2.0860 | <i>L. braziliensis</i> | 43  | 1409 | 1451 |
| LbrM13_V2.0890 | <i>L. braziliensis</i> | 40  | 1    | 40   |
| LbrM13_V2.0900 | <i>L. braziliensis</i> | 51  | 102  | 152  |
| LbrM13_V2.0910 | <i>L. braziliensis</i> | 292 | 45   | 336  |
| LbrM13_V2.0910 | <i>L. braziliensis</i> | 152 | 342  | 493  |
| LbrM13_V2.0930 | <i>L. braziliensis</i> | 54  | 89   | 142  |
| LbrM13_V2.0930 | <i>L. braziliensis</i> | 93  | 241  | 333  |
| LbrM13_V2.0930 | <i>L. braziliensis</i> | 93  | 241  | 333  |
| LbrM13_V2.0940 | <i>L. braziliensis</i> | 48  | 172  | 219  |
| LbrM13_V2.0970 | <i>L. braziliensis</i> | 157 | 1    | 157  |
| LbrM13_V2.0980 | <i>L. braziliensis</i> | 75  | 1    | 75   |
| LbrM13_V2.0990 | <i>L. braziliensis</i> | 101 | 230  | 330  |
| LbrM13_V2.1010 | <i>L. braziliensis</i> | 64  | 153  | 216  |
| LbrM13_V2.1010 | <i>L. braziliensis</i> | 77  | 273  | 349  |
| LbrM13_V2.1010 | <i>L. braziliensis</i> | 47  | 497  | 543  |
| LbrM13_V2.1020 | <i>L. braziliensis</i> | 76  | 70   | 145  |
| LbrM13_V2.1030 | <i>L. braziliensis</i> | 73  | 127  | 199  |
| LbrM13_V2.1040 | <i>L. braziliensis</i> | 63  | 41   | 103  |
| LbrM13_V2.1040 | <i>L. braziliensis</i> | 42  | 105  | 146  |
| LbrM13_V2.1040 | <i>L. braziliensis</i> | 44  | 263  | 306  |
| LbrM13_V2.1040 | <i>L. braziliensis</i> | 95  | 485  | 579  |
| LbrM13_V2.1040 | <i>L. braziliensis</i> | 52  | 669  | 720  |
| LbrM13_V2.1040 | <i>L. braziliensis</i> | 99  | 751  | 849  |
| LbrM13_V2.1060 | <i>L. braziliensis</i> | 232 | 1    | 232  |

|                |                        |     |      |      |
|----------------|------------------------|-----|------|------|
| LbrM13_V2.1060 | <i>L. braziliensis</i> | 234 | 278  | 511  |
| LbrM13_V2.1060 | <i>L. braziliensis</i> | 56  | 527  | 582  |
| LbrM13_V2.1060 | <i>L. braziliensis</i> | 46  | 613  | 658  |
| LbrM13_V2.1060 | <i>L. braziliensis</i> | 81  | 854  | 934  |
| LbrM13_V2.1060 | <i>L. braziliensis</i> | 40  | 961  | 1000 |
| LbrM13_V2.1080 | <i>L. braziliensis</i> | 109 | 313  | 421  |
| LbrM13_V2.1090 | <i>L. braziliensis</i> | 55  | 316  | 370  |
| LbrM13_V2.1090 | <i>L. braziliensis</i> | 69  | 405  | 473  |
| LbrM13_V2.1100 | <i>L. braziliensis</i> | 55  | 351  | 405  |
| LbrM13_V2.1110 | <i>L. braziliensis</i> | 127 | 1    | 127  |
| LbrM13_V2.1110 | <i>L. braziliensis</i> | 147 | 435  | 581  |
| LbrM13_V2.1110 | <i>L. braziliensis</i> | 127 | 631  | 757  |
| LbrM13_V2.1110 | <i>L. braziliensis</i> | 109 | 783  | 891  |
| LbrM13_V2.1110 | <i>L. braziliensis</i> | 121 | 912  | 1032 |
| LbrM13_V2.1110 | <i>L. braziliensis</i> | 259 | 1039 | 1297 |
| LbrM13_V2.1120 | <i>L. braziliensis</i> | 92  | 47   | 138  |
| LbrM13_V2.1120 | <i>L. braziliensis</i> | 119 | 200  | 318  |
| LbrM13_V2.1120 | <i>L. braziliensis</i> | 104 | 591  | 694  |
| LbrM13_V2.1120 | <i>L. braziliensis</i> | 65  | 750  | 814  |
| LbrM13_V2.1120 | <i>L. braziliensis</i> | 50  | 859  | 908  |
| LbrM13_V2.1120 | <i>L. braziliensis</i> | 41  | 992  | 1032 |
| LbrM13_V2.1120 | <i>L. braziliensis</i> | 55  | 1064 | 1118 |
| LbrM13_V2.1130 | <i>L. braziliensis</i> | 84  | 353  | 436  |
| LbrM13_V2.1130 | <i>L. braziliensis</i> | 67  | 451  | 517  |
| LbrM13_V2.1130 | <i>L. braziliensis</i> | 69  | 615  | 683  |
| LbrM13_V2.1140 | <i>L. braziliensis</i> | 61  | 57   | 117  |
| LbrM13_V2.1140 | <i>L. braziliensis</i> | 105 | 171  | 275  |
| LbrM13_V2.1140 | <i>L. braziliensis</i> | 45  | 404  | 448  |
| LbrM13_V2.1140 | <i>L. braziliensis</i> | 58  | 478  | 535  |
| LbrM13_V2.1170 | <i>L. braziliensis</i> | 42  | 400  | 441  |
| LbrM13_V2.1180 | <i>L. braziliensis</i> | 126 | 1    | 126  |
| LbrM13_V2.1180 | <i>L. braziliensis</i> | 442 | 133  | 574  |
| LbrM13_V2.1180 | <i>L. braziliensis</i> | 569 | 586  | 1154 |
| LbrM13_V2.1180 | <i>L. braziliensis</i> | 148 | 1166 | 1313 |
| LbrM13_V2.1190 | <i>L. braziliensis</i> | 71  | 11   | 81   |
| LbrM13_V2.1190 | <i>L. braziliensis</i> | 61  | 137  | 197  |
| LbrM13_V2.1190 | <i>L. braziliensis</i> | 61  | 137  | 197  |
| LbrM13_V2.1200 | <i>L. braziliensis</i> | 68  | 16   | 83   |
| LbrM13_V2.1200 | <i>L. braziliensis</i> | 173 | 290  | 462  |
| LbrM13_V2.1200 | <i>L. braziliensis</i> | 130 | 499  | 628  |
| LbrM13_V2.1210 | <i>L. braziliensis</i> | 228 | 41   | 268  |
| LbrM13_V2.1210 | <i>L. braziliensis</i> | 68  | 309  | 376  |
| LbrM13_V2.1210 | <i>L. braziliensis</i> | 53  | 771  | 823  |
| LbrM13_V2.1210 | <i>L. braziliensis</i> | 67  | 825  | 891  |
| LbrM13_V2.1210 | <i>L. braziliensis</i> | 66  | 1019 | 1084 |
| LbrM13_V2.1210 | <i>L. braziliensis</i> | 48  | 1187 | 1234 |
| LbrM13_V2.1220 | <i>L. braziliensis</i> | 61  | 1    | 61   |

|                |                        |     |      |      |
|----------------|------------------------|-----|------|------|
| LbrM13_V2.1230 | <i>L. braziliensis</i> | 62  | 1    | 62   |
| LbrM13_V2.1230 | <i>L. braziliensis</i> | 57  | 270  | 326  |
| LbrM13_V2.1230 | <i>L. braziliensis</i> | 49  | 731  | 779  |
| LbrM13_V2.1230 | <i>L. braziliensis</i> | 87  | 1183 | 1269 |
| LbrM13_V2.1230 | <i>L. braziliensis</i> | 72  | 1390 | 1461 |
| LbrM13_V2.1230 | <i>L. braziliensis</i> | 44  | 1510 | 1553 |
| LbrM13_V2.1230 | <i>L. braziliensis</i> | 57  | 1655 | 1711 |
| LbrM13_V2.1230 | <i>L. braziliensis</i> | 89  | 1915 | 2003 |
| LbrM13_V2.1230 | <i>L. braziliensis</i> | 78  | 2048 | 2125 |
| LbrM13_V2.1230 | <i>L. braziliensis</i> | 52  | 2149 | 2200 |
| LbrM13_V2.1230 | <i>L. braziliensis</i> | 45  | 2370 | 2414 |
| LbrM13_V2.1230 | <i>L. braziliensis</i> | 57  | 2432 | 2488 |
| LbrM13_V2.1230 | <i>L. braziliensis</i> | 49  | 2874 | 2922 |
| LbrM13_V2.1230 | <i>L. braziliensis</i> | 214 | 3073 | 3286 |
| LbrM13_V2.1230 | <i>L. braziliensis</i> | 51  | 3706 | 3756 |
| LbrM13_V2.1230 | <i>L. braziliensis</i> | 116 | 4063 | 4178 |
| LbrM13_V2.1230 | <i>L. braziliensis</i> | 45  | 4203 | 4247 |
| LbrM13_V2.1230 | <i>L. braziliensis</i> | 46  | 4591 | 4636 |
| LbrM13_V2.1230 | <i>L. braziliensis</i> | 44  | 4693 | 4736 |
| LbrM13_V2.1230 | <i>L. braziliensis</i> | 44  | 5309 | 5352 |
| LbrM13_V2.1250 | <i>L. braziliensis</i> | 43  | 605  | 647  |
| LbrM13_V2.1250 | <i>L. braziliensis</i> | 126 | 684  | 809  |
| LbrM13_V2.1260 | <i>L. braziliensis</i> | 373 | 1    | 373  |
| LbrM13_V2.1260 | <i>L. braziliensis</i> | 260 | 390  | 649  |
| LbrM13_V2.1260 | <i>L. braziliensis</i> | 194 | 651  | 844  |
| LbrM13_V2.1260 | <i>L. braziliensis</i> | 41  | 886  | 926  |
| LbrM13_V2.1270 | <i>L. braziliensis</i> | 177 | 1    | 177  |
| LbrM13_V2.1290 | <i>L. braziliensis</i> | 275 | 1    | 275  |
| LbrM13_V2.1290 | <i>L. braziliensis</i> | 41  | 586  | 626  |
| LbrM13_V2.1290 | <i>L. braziliensis</i> | 41  | 586  | 626  |
| LbrM13_V2.1300 | <i>L. braziliensis</i> | 40  | 14   | 53   |
| LbrM13_V2.1310 | <i>L. braziliensis</i> | 535 | 1    | 535  |
| LbrM13_V2.1310 | <i>L. braziliensis</i> | 123 | 572  | 694  |
| LbrM13_V2.1320 | <i>L. braziliensis</i> | 176 | 1    | 176  |
| LbrM13_V2.1320 | <i>L. braziliensis</i> | 324 | 203  | 526  |
| LbrM13_V2.1320 | <i>L. braziliensis</i> | 213 | 593  | 805  |
| LbrM13_V2.1320 | <i>L. braziliensis</i> | 91  | 821  | 911  |
| LbrM13_V2.1320 | <i>L. braziliensis</i> | 113 | 925  | 1037 |
| LbrM13_V2.1320 | <i>L. braziliensis</i> | 320 | 1072 | 1391 |
| LbrM13_V2.1320 | <i>L. braziliensis</i> | 49  | 1417 | 1465 |
| LbrM13_V2.1320 | <i>L. braziliensis</i> | 244 | 1471 | 1714 |
| LbrM13_V2.1340 | <i>L. braziliensis</i> | 65  | 294  | 358  |
| LbrM13_V2.1350 | <i>L. braziliensis</i> | 89  | 18   | 106  |
| LbrM13_V2.1350 | <i>L. braziliensis</i> | 161 | 296  | 456  |
| LbrM13_V2.1360 | <i>L. braziliensis</i> | 91  | 1    | 91   |
| LbrM13_V2.1360 | <i>L. braziliensis</i> | 159 | 600  | 758  |
| LbrM13_V2.1370 | <i>L. braziliensis</i> | 40  | 63   | 102  |

|                |                        |     |      |      |
|----------------|------------------------|-----|------|------|
| LbrM13_V2.1390 | <i>L. braziliensis</i> | 55  | 46   | 100  |
| LbrM13_V2.1390 | <i>L. braziliensis</i> | 74  | 335  | 408  |
| LbrM13_V2.1390 | <i>L. braziliensis</i> | 74  | 335  | 408  |
| LbrM13_V2.1410 | <i>L. braziliensis</i> | 383 | 703  | 1085 |
| LbrM13_V2.1430 | <i>L. braziliensis</i> | 65  | 1    | 65   |
| LbrM13_V2.1430 | <i>L. braziliensis</i> | 57  | 90   | 146  |
| LbrM13_V2.1430 | <i>L. braziliensis</i> | 62  | 178  | 239  |
| LbrM13_V2.1450 | <i>L. braziliensis</i> | 642 | 1    | 642  |
| LbrM13_V2.1460 | <i>L. braziliensis</i> | 60  | 334  | 393  |
| LbrM13_V2.1460 | <i>L. braziliensis</i> | 62  | 428  | 489  |
| LbrM13_V2.1460 | <i>L. braziliensis</i> | 72  | 507  | 578  |
| LbrM13_V2.1460 | <i>L. braziliensis</i> | 61  | 609  | 669  |
| LbrM13_V2.1460 | <i>L. braziliensis</i> | 361 | 713  | 1073 |
| LbrM13_V2.1460 | <i>L. braziliensis</i> | 48  | 1099 | 1146 |
| LbrM13_V2.1460 | <i>L. braziliensis</i> | 44  | 1184 | 1227 |
| LbrM13_V2.1460 | <i>L. braziliensis</i> | 46  | 1265 | 1310 |
| LbrM13_V2.1470 | <i>L. braziliensis</i> | 141 | 66   | 206  |
| LbrM13_V2.1470 | <i>L. braziliensis</i> | 181 | 513  | 693  |
| LbrM13_V2.1510 | <i>L. braziliensis</i> | 46  | 1    | 46   |
| LbrM13_V2.1510 | <i>L. braziliensis</i> | 59  | 1179 | 1237 |
| LbrM13_V2.1510 | <i>L. braziliensis</i> | 87  | 3147 | 3233 |
| LbrM13_V2.1510 | <i>L. braziliensis</i> | 72  | 4075 | 4146 |
| LbrM13_V2.1510 | <i>L. braziliensis</i> | 60  | 4379 | 4438 |
| LbrM13_V2.1530 | <i>L. braziliensis</i> | 78  | 1    | 78   |
| LbrM13_V2.1570 | <i>L. braziliensis</i> | 62  | 1    | 62   |
| LbrM13_V2.1570 | <i>L. braziliensis</i> | 45  | 89   | 133  |
| LbrM13_V2.1570 | <i>L. braziliensis</i> | 46  | 243  | 288  |
| LbrM13_V2.1570 | <i>L. braziliensis</i> | 65  | 314  | 378  |
| LbrM13_V2.1590 | <i>L. braziliensis</i> | 188 | 1    | 188  |
| LbrM13_V2.1590 | <i>L. braziliensis</i> | 396 | 210  | 605  |
| LbrM13_V2.1590 | <i>L. braziliensis</i> | 175 | 642  | 816  |
| LbrM13_V2.1590 | <i>L. braziliensis</i> | 302 | 861  | 1162 |
| LbrM13_V2.1590 | <i>L. braziliensis</i> | 125 | 1245 | 1369 |
| LbrM13_V2.1590 | <i>L. braziliensis</i> | 379 | 1392 | 1770 |
| LbrM13_V2.1590 | <i>L. braziliensis</i> | 110 | 1831 | 1940 |
| LbrM13_V2.1590 | <i>L. braziliensis</i> | 40  | 1993 | 2032 |
| LbrM13_V2.1590 | <i>L. braziliensis</i> | 41  | 2071 | 2111 |
| LbrM13_V2.1590 | <i>L. braziliensis</i> | 48  | 2323 | 2370 |
| LbrM13_V2.1590 | <i>L. braziliensis</i> | 74  | 2405 | 2478 |
| LbrM13_V2.1590 | <i>L. braziliensis</i> | 58  | 2480 | 2537 |
| LbrM14_V2.0030 | <i>L. braziliensis</i> | 144 | 115  | 258  |
| LbrM14_V2.0040 | <i>L. braziliensis</i> | 87  | 168  | 254  |
| LbrM14_V2.0050 | <i>L. braziliensis</i> | 54  | 219  | 272  |
| LbrM14_V2.0080 | <i>L. braziliensis</i> | 59  | 1    | 59   |
| LbrM14_V2.0090 | <i>L. braziliensis</i> | 66  | 83   | 148  |
| LbrM14_V2.0090 | <i>L. braziliensis</i> | 141 | 208  | 348  |
| LbrM14_V2.0100 | <i>L. braziliensis</i> | 83  | 1    | 83   |

|                |                        |     |      |      |
|----------------|------------------------|-----|------|------|
| LbrM14_V2.0100 | <i>L. braziliensis</i> | 44  | 325  | 368  |
| LbrM14_V2.0100 | <i>L. braziliensis</i> | 59  | 389  | 447  |
| LbrM14_V2.0110 | <i>L. braziliensis</i> | 59  | 380  | 438  |
| LbrM14_V2.0110 | <i>L. braziliensis</i> | 66  | 460  | 525  |
| LbrM14_V2.0120 | <i>L. braziliensis</i> | 132 | 1    | 132  |
| LbrM14_V2.0120 | <i>L. braziliensis</i> | 145 | 194  | 338  |
| LbrM14_V2.0140 | <i>L. braziliensis</i> | 70  | 57   | 126  |
| LbrM14_V2.0140 | <i>L. braziliensis</i> | 53  | 187  | 239  |
| LbrM14_V2.0150 | <i>L. braziliensis</i> | 50  | 75   | 124  |
| LbrM14_V2.0160 | <i>L. braziliensis</i> | 58  | 55   | 112  |
| LbrM14_V2.0170 | <i>L. braziliensis</i> | 59  | 1    | 59   |
| LbrM14_V2.0170 | <i>L. braziliensis</i> | 51  | 64   | 114  |
| LbrM14_V2.0170 | <i>L. braziliensis</i> | 54  | 415  | 468  |
| LbrM14_V2.0200 | <i>L. braziliensis</i> | 173 | 20   | 192  |
| LbrM14_V2.0210 | <i>L. braziliensis</i> | 43  | 54   | 96   |
| LbrM14_V2.0210 | <i>L. braziliensis</i> | 62  | 158  | 219  |
| LbrM14_V2.0210 | <i>L. braziliensis</i> | 71  | 224  | 294  |
| LbrM14_V2.0210 | <i>L. braziliensis</i> | 49  | 345  | 393  |
| LbrM14_V2.0220 | <i>L. braziliensis</i> | 71  | 157  | 227  |
| LbrM14_V2.0230 | <i>L. braziliensis</i> | 103 | 151  | 253  |
| LbrM14_V2.0230 | <i>L. braziliensis</i> | 46  | 318  | 363  |
| LbrM14_V2.0230 | <i>L. braziliensis</i> | 96  | 432  | 527  |
| LbrM14_V2.0230 | <i>L. braziliensis</i> | 128 | 560  | 687  |
| LbrM14_V2.0230 | <i>L. braziliensis</i> | 83  | 822  | 904  |
| LbrM14_V2.0230 | <i>L. braziliensis</i> | 64  | 1144 | 1207 |
| LbrM14_V2.0230 | <i>L. braziliensis</i> | 288 | 1537 | 1824 |
| LbrM14_V2.0260 | <i>L. braziliensis</i> | 46  | 472  | 517  |
| LbrM14_V2.0260 | <i>L. braziliensis</i> | 56  | 661  | 716  |
| LbrM14_V2.0260 | <i>L. braziliensis</i> | 56  | 661  | 716  |
| LbrM14_V2.0280 | <i>L. braziliensis</i> | 137 | 827  | 963  |
| LbrM14_V2.0290 | <i>L. braziliensis</i> | 56  | 53   | 108  |
| LbrM14_V2.0300 | <i>L. braziliensis</i> | 94  | 141  | 234  |
| LbrM14_V2.0310 | <i>L. braziliensis</i> | 63  | 223  | 285  |
| LbrM14_V2.0320 | <i>L. braziliensis</i> | 62  | 1    | 62   |
| LbrM14_V2.0320 | <i>L. braziliensis</i> | 99  | 654  | 752  |
| LbrM14_V2.0320 | <i>L. braziliensis</i> | 99  | 654  | 752  |
| LbrM14_V2.0330 | <i>L. braziliensis</i> | 208 | 1    | 208  |
| LbrM14_V2.0340 | <i>L. braziliensis</i> | 348 | 1    | 348  |
| LbrM14_V2.0340 | <i>L. braziliensis</i> | 66  | 361  | 426  |
| LbrM14_V2.0340 | <i>L. braziliensis</i> | 58  | 439  | 496  |
| LbrM14_V2.0340 | <i>L. braziliensis</i> | 72  | 510  | 581  |
| LbrM14_V2.0340 | <i>L. braziliensis</i> | 41  | 606  | 646  |
| LbrM14_V2.0340 | <i>L. braziliensis</i> | 77  | 683  | 759  |
| LbrM14_V2.0360 | <i>L. braziliensis</i> | 245 | 16   | 260  |
| LbrM14_V2.0360 | <i>L. braziliensis</i> | 57  | 403  | 459  |
| LbrM14_V2.0360 | <i>L. braziliensis</i> | 42  | 594  | 635  |
| LbrM14_V2.0360 | <i>L. braziliensis</i> | 62  | 676  | 737  |

|                |                        |     |      |      |
|----------------|------------------------|-----|------|------|
| LbrM14_V2.0360 | <i>L. braziliensis</i> | 253 | 775  | 1027 |
| LbrM14_V2.0370 | <i>L. braziliensis</i> | 263 | 82   | 344  |
| LbrM14_V2.0370 | <i>L. braziliensis</i> | 286 | 378  | 663  |
| LbrM14_V2.0370 | <i>L. braziliensis</i> | 158 | 675  | 832  |
| LbrM14_V2.0370 | <i>L. braziliensis</i> | 920 | 841  | 1760 |
| LbrM14_V2.0370 | <i>L. braziliensis</i> | 631 | 1777 | 2407 |
| LbrM14_V2.0370 | <i>L. braziliensis</i> | 52  | 2464 | 2515 |
| LbrM14_V2.0380 | <i>L. braziliensis</i> | 81  | 22   | 102  |
| LbrM14_V2.0410 | <i>L. braziliensis</i> | 162 | 1    | 162  |
| LbrM14_V2.0420 | <i>L. braziliensis</i> | 343 | 1    | 343  |
| LbrM14_V2.0420 | <i>L. braziliensis</i> | 100 | 565  | 664  |
| LbrM14_V2.0430 | <i>L. braziliensis</i> | 170 | 173  | 342  |
| LbrM14_V2.0430 | <i>L. braziliensis</i> | 493 | 351  | 843  |
| LbrM14_V2.0450 | <i>L. braziliensis</i> | 63  | 231  | 293  |
| LbrM14_V2.0460 | <i>L. braziliensis</i> | 123 | 38   | 160  |
| LbrM14_V2.0460 | <i>L. braziliensis</i> | 64  | 264  | 327  |
| LbrM14_V2.0470 | <i>L. braziliensis</i> | 42  | 1    | 42   |
| LbrM14_V2.0510 | <i>L. braziliensis</i> | 63  | 1    | 63   |
| LbrM14_V2.0520 | <i>L. braziliensis</i> | 147 | 358  | 504  |
| LbrM14_V2.0530 | <i>L. braziliensis</i> | 59  | 1    | 59   |
| LbrM14_V2.0540 | <i>L. braziliensis</i> | 178 | 312  | 489  |
| LbrM14_V2.0550 | <i>L. braziliensis</i> | 98  | 389  | 486  |
| LbrM14_V2.0550 | <i>L. braziliensis</i> | 59  | 917  | 975  |
| LbrM14_V2.0570 | <i>L. braziliensis</i> | 41  | 368  | 408  |
| LbrM14_V2.0570 | <i>L. braziliensis</i> | 72  | 607  | 678  |
| LbrM14_V2.0570 | <i>L. braziliensis</i> | 120 | 680  | 799  |
| LbrM14_V2.0570 | <i>L. braziliensis</i> | 115 | 802  | 916  |
| LbrM14_V2.0570 | <i>L. braziliensis</i> | 210 | 966  | 1175 |
| LbrM14_V2.0570 | <i>L. braziliensis</i> | 120 | 1180 | 1299 |
| LbrM14_V2.0580 | <i>L. braziliensis</i> | 71  | 34   | 104  |
| LbrM14_V2.0580 | <i>L. braziliensis</i> | 61  | 142  | 202  |
| LbrM14_V2.0590 | <i>L. braziliensis</i> | 46  | 106  | 151  |
| LbrM14_V2.0590 | <i>L. braziliensis</i> | 49  | 178  | 226  |
| LbrM14_V2.0590 | <i>L. braziliensis</i> | 45  | 276  | 320  |
| LbrM14_V2.0590 | <i>L. braziliensis</i> | 101 | 367  | 467  |
| LbrM14_V2.0600 | <i>L. braziliensis</i> | 224 | 1    | 224  |
| LbrM14_V2.0600 | <i>L. braziliensis</i> | 197 | 273  | 469  |
| LbrM14_V2.0610 | <i>L. braziliensis</i> | 119 | 93   | 211  |
| LbrM14_V2.0730 | <i>L. braziliensis</i> | 58  | 19   | 76   |
| LbrM14_V2.0730 | <i>L. braziliensis</i> | 95  | 99   | 193  |
| LbrM14_V2.0730 | <i>L. braziliensis</i> | 307 | 884  | 1190 |
| LbrM14_V2.0730 | <i>L. braziliensis</i> | 71  | 1193 | 1263 |
| LbrM14_V2.0730 | <i>L. braziliensis</i> | 463 | 1313 | 1775 |
| LbrM14_V2.0750 | <i>L. braziliensis</i> | 267 | 98   | 364  |
| LbrM14_V2.0770 | <i>L. braziliensis</i> | 120 | 1    | 120  |
| LbrM14_V2.0770 | <i>L. braziliensis</i> | 208 | 144  | 351  |
| LbrM14_V2.0770 | <i>L. braziliensis</i> | 57  | 386  | 442  |

|                |                        |     |      |      |
|----------------|------------------------|-----|------|------|
| LbrM14_V2.0770 | <i>L. braziliensis</i> | 60  | 576  | 635  |
| LbrM14_V2.0770 | <i>L. braziliensis</i> | 66  | 637  | 702  |
| LbrM14_V2.0770 | <i>L. braziliensis</i> | 84  | 722  | 805  |
| LbrM14_V2.0770 | <i>L. braziliensis</i> | 94  | 930  | 1023 |
| LbrM14_V2.0770 | <i>L. braziliensis</i> | 47  | 1044 | 1090 |
| LbrM14_V2.0770 | <i>L. braziliensis</i> | 148 | 1158 | 1305 |
| LbrM14_V2.0770 | <i>L. braziliensis</i> | 42  | 1400 | 1441 |
| LbrM14_V2.0770 | <i>L. braziliensis</i> | 72  | 1497 | 1568 |
| LbrM14_V2.0770 | <i>L. braziliensis</i> | 66  | 1688 | 1753 |
| LbrM14_V2.0770 | <i>L. braziliensis</i> | 176 | 1783 | 1958 |
| LbrM14_V2.0770 | <i>L. braziliensis</i> | 71  | 1963 | 2033 |
| LbrM14_V2.0770 | <i>L. braziliensis</i> | 73  | 2044 | 2116 |
| LbrM14_V2.0770 | <i>L. braziliensis</i> | 75  | 2179 | 2253 |
| LbrM14_V2.0770 | <i>L. braziliensis</i> | 84  | 2317 | 2400 |
| LbrM14_V2.0770 | <i>L. braziliensis</i> | 449 | 2403 | 2851 |
| LbrM14_V2.0770 | <i>L. braziliensis</i> | 209 | 2861 | 3069 |
| LbrM14_V2.0770 | <i>L. braziliensis</i> | 849 | 3086 | 3934 |
| LbrM14_V2.0770 | <i>L. braziliensis</i> | 82  | 3969 | 4050 |
| LbrM14_V2.0770 | <i>L. braziliensis</i> | 127 | 4063 | 4189 |
| LbrM14_V2.0780 | <i>L. braziliensis</i> | 425 | 1    | 425  |
| LbrM14_V2.0790 | <i>L. braziliensis</i> | 460 | 114  | 573  |
| LbrM14_V2.0800 | <i>L. braziliensis</i> | 52  | 1    | 52   |
| LbrM14_V2.0800 | <i>L. braziliensis</i> | 102 | 256  | 357  |
| LbrM14_V2.0800 | <i>L. braziliensis</i> | 75  | 451  | 525  |
| LbrM14_V2.0810 | <i>L. braziliensis</i> | 195 | 11   | 205  |
| LbrM14_V2.0810 | <i>L. braziliensis</i> | 93  | 270  | 362  |
| LbrM14_V2.0810 | <i>L. braziliensis</i> | 56  | 404  | 459  |
| LbrM14_V2.0810 | <i>L. braziliensis</i> | 42  | 816  | 857  |
| LbrM14_V2.0810 | <i>L. braziliensis</i> | 114 | 1051 | 1164 |
| LbrM14_V2.0810 | <i>L. braziliensis</i> | 85  | 1174 | 1258 |
| LbrM14_V2.0820 | <i>L. braziliensis</i> | 53  | 63   | 115  |
| LbrM14_V2.0830 | <i>L. braziliensis</i> | 53  | 63   | 115  |
| LbrM14_V2.0850 | <i>L. braziliensis</i> | 50  | 70   | 119  |
| LbrM14_V2.0850 | <i>L. braziliensis</i> | 79  | 148  | 226  |
| LbrM14_V2.0850 | <i>L. braziliensis</i> | 243 | 296  | 538  |
| LbrM14_V2.0850 | <i>L. braziliensis</i> | 64  | 568  | 631  |
| LbrM14_V2.0860 | <i>L. braziliensis</i> | 70  | 150  | 219  |
| LbrM14_V2.0860 | <i>L. braziliensis</i> | 265 | 257  | 521  |
| LbrM14_V2.0860 | <i>L. braziliensis</i> | 88  | 544  | 631  |
| LbrM14_V2.0870 | <i>L. braziliensis</i> | 45  | 1    | 45   |
| LbrM14_V2.0870 | <i>L. braziliensis</i> | 440 | 62   | 501  |
| LbrM14_V2.0870 | <i>L. braziliensis</i> | 58  | 884  | 941  |
| LbrM14_V2.0880 | <i>L. braziliensis</i> | 41  | 212  | 252  |
| LbrM14_V2.0890 | <i>L. braziliensis</i> | 127 | 1    | 127  |
| LbrM14_V2.0890 | <i>L. braziliensis</i> | 90  | 495  | 584  |
| LbrM14_V2.0890 | <i>L. braziliensis</i> | 43  | 1032 | 1074 |
| LbrM14_V2.0890 | <i>L. braziliensis</i> | 45  | 1198 | 1242 |



|                |                        |      |      |      |
|----------------|------------------------|------|------|------|
| LbrM14_V2.0900 | <i>L. braziliensis</i> | 44   | 165  | 208  |
| LbrM14_V2.0900 | <i>L. braziliensis</i> | 85   | 371  | 455  |
| LbrM14_V2.0900 | <i>L. braziliensis</i> | 85   | 371  | 455  |
| LbrM14_V2.0910 | <i>L. braziliensis</i> | 132  | 1    | 132  |
| LbrM14_V2.0910 | <i>L. braziliensis</i> | 446  | 135  | 580  |
| LbrM14_V2.0910 | <i>L. braziliensis</i> | 45   | 647  | 691  |
| LbrM14_V2.0910 | <i>L. braziliensis</i> | 40   | 855  | 894  |
| LbrM14_V2.0930 | <i>L. braziliensis</i> | 212  | 1    | 212  |
| LbrM14_V2.0930 | <i>L. braziliensis</i> | 58   | 398  | 455  |
| LbrM14_V2.0930 | <i>L. braziliensis</i> | 56   | 710  | 765  |
| LbrM14_V2.0930 | <i>L. braziliensis</i> | 40   | 818  | 857  |
| LbrM14_V2.0930 | <i>L. braziliensis</i> | 50   | 945  | 994  |
| LbrM14_V2.0930 | <i>L. braziliensis</i> | 69   | 1039 | 1107 |
| LbrM14_V2.0940 | <i>L. braziliensis</i> | 266  | 110  | 375  |
| LbrM14_V2.0950 | <i>L. braziliensis</i> | 40   | 211  | 250  |
| LbrM14_V2.0960 | <i>L. braziliensis</i> | 96   | 1    | 96   |
| LbrM14_V2.0960 | <i>L. braziliensis</i> | 50   | 110  | 159  |
| LbrM14_V2.0960 | <i>L. braziliensis</i> | 60   | 726  | 785  |
| LbrM14_V2.0980 | <i>L. braziliensis</i> | 59   | 1    | 59   |
| LbrM14_V2.0990 | <i>L. braziliensis</i> | 166  | 31   | 196  |
| LbrM14_V2.0990 | <i>L. braziliensis</i> | 98   | 450  | 547  |
| LbrM14_V2.0990 | <i>L. braziliensis</i> | 47   | 838  | 884  |
| LbrM14_V2.1000 | <i>L. braziliensis</i> | 95   | 62   | 156  |
| LbrM14_V2.1000 | <i>L. braziliensis</i> | 44   | 186  | 229  |
| LbrM14_V2.1000 | <i>L. braziliensis</i> | 44   | 186  | 229  |
| LbrM14_V2.1050 | <i>L. braziliensis</i> | 96   | 1531 | 1626 |
| LbrM14_V2.1050 | <i>L. braziliensis</i> | 51   | 1848 | 1898 |
| LbrM14_V2.1050 | <i>L. braziliensis</i> | 111  | 2624 | 2734 |
| LbrM14_V2.1050 | <i>L. braziliensis</i> | 49   | 2844 | 2892 |
| LbrM14_V2.1050 | <i>L. braziliensis</i> | 65   | 3282 | 3346 |
| LbrM14_V2.1050 | <i>L. braziliensis</i> | 75   | 3827 | 3901 |
| LbrM14_V2.1050 | <i>L. braziliensis</i> | 92   | 3910 | 4001 |
| LbrM14_V2.1060 | <i>L. braziliensis</i> | 348  | 1    | 348  |
| LbrM14_V2.1060 | <i>L. braziliensis</i> | 64   | 369  | 432  |
| LbrM14_V2.1060 | <i>L. braziliensis</i> | 49   | 499  | 547  |
| LbrM14_V2.1060 | <i>L. braziliensis</i> | 77   | 609  | 685  |
| LbrM14_V2.1060 | <i>L. braziliensis</i> | 61   | 923  | 983  |
| LbrM14_V2.1070 | <i>L. braziliensis</i> | 66   | 64   | 129  |
| LbrM14_V2.1070 | <i>L. braziliensis</i> | 44   | 169  | 212  |
| LbrM14_V2.1070 | <i>L. braziliensis</i> | 40   | 277  | 316  |
| LbrM14_V2.1100 | <i>L. braziliensis</i> | 71   | 1    | 71   |
| LbrM14_V2.1100 | <i>L. braziliensis</i> | 63   | 258  | 320  |
| LbrM14_V2.1100 | <i>L. braziliensis</i> | 228  | 409  | 636  |
| LbrM14_V2.1100 | <i>L. braziliensis</i> | 46   | 688  | 733  |
| LbrM14_V2.1100 | <i>L. braziliensis</i> | 1318 | 742  | 2059 |
| LbrM14_V2.1120 | <i>L. braziliensis</i> | 63   | 113  | 175  |
| LbrM14_V2.1120 | <i>L. braziliensis</i> | 165  | 264  | 428  |

|                |                        |      |      |      |
|----------------|------------------------|------|------|------|
| LbrM14_V2.1120 | <i>L. braziliensis</i> | 114  | 482  | 595  |
| LbrM14_V2.1120 | <i>L. braziliensis</i> | 51   | 597  | 647  |
| LbrM14_V2.1120 | <i>L. braziliensis</i> | 1113 | 739  | 1851 |
| LbrM14_V2.1120 | <i>L. braziliensis</i> | 89   | 1878 | 1966 |
| LbrM14_V2.1130 | <i>L. braziliensis</i> | 139  | 1    | 139  |
| LbrM14_V2.1130 | <i>L. braziliensis</i> | 77   | 255  | 331  |
| LbrM14_V2.1130 | <i>L. braziliensis</i> | 86   | 584  | 669  |
| LbrM14_V2.1140 | <i>L. braziliensis</i> | 57   | 158  | 214  |
| LbrM14_V2.1140 | <i>L. braziliensis</i> | 42   | 296  | 337  |
| LbrM14_V2.1140 | <i>L. braziliensis</i> | 48   | 437  | 484  |
| LbrM14_V2.1150 | <i>L. braziliensis</i> | 60   | 21   | 80   |
| LbrM14_V2.1150 | <i>L. braziliensis</i> | 77   | 240  | 316  |
| LbrM14_V2.1160 | <i>L. braziliensis</i> | 133  | 119  | 251  |
| LbrM14_V2.1170 | <i>L. braziliensis</i> | 53   | 1    | 53   |
| LbrM14_V2.1170 | <i>L. braziliensis</i> | 270  | 597  | 866  |
| LbrM14_V2.1170 | <i>L. braziliensis</i> | 145  | 934  | 1078 |
| LbrM14_V2.1180 | <i>L. braziliensis</i> | 115  | 29   | 143  |
| LbrM14_V2.1190 | <i>L. braziliensis</i> | 153  | 1    | 153  |
| LbrM14_V2.1200 | <i>L. braziliensis</i> | 88   | 1    | 88   |
| LbrM14_V2.1200 | <i>L. braziliensis</i> | 330  | 188  | 517  |
| LbrM14_V2.1210 | <i>L. braziliensis</i> | 67   | 1    | 67   |
| LbrM14_V2.1210 | <i>L. braziliensis</i> | 47   | 134  | 180  |
| LbrM14_V2.1210 | <i>L. braziliensis</i> | 74   | 194  | 267  |
| LbrM14_V2.1210 | <i>L. braziliensis</i> | 56   | 635  | 690  |
| LbrM14_V2.1230 | <i>L. braziliensis</i> | 348  | 19   | 366  |
| LbrM14_V2.1230 | <i>L. braziliensis</i> | 55   | 437  | 491  |
| LbrM14_V2.1230 | <i>L. braziliensis</i> | 230  | 510  | 739  |
| LbrM14_V2.1230 | <i>L. braziliensis</i> | 163  | 781  | 943  |
| LbrM14_V2.1230 | <i>L. braziliensis</i> | 62   | 960  | 1021 |
| LbrM14_V2.1240 | <i>L. braziliensis</i> | 59   | 1    | 59   |
| LbrM14_V2.1240 | <i>L. braziliensis</i> | 58   | 325  | 382  |
| LbrM14_V2.1240 | <i>L. braziliensis</i> | 58   | 325  | 382  |
| LbrM14_V2.1250 | <i>L. braziliensis</i> | 69   | 29   | 97   |
| LbrM14_V2.1260 | <i>L. braziliensis</i> | 186  | 1    | 186  |
| LbrM14_V2.1260 | <i>L. braziliensis</i> | 76   | 215  | 290  |
| LbrM14_V2.1260 | <i>L. braziliensis</i> | 113  | 476  | 588  |
| LbrM14_V2.1260 | <i>L. braziliensis</i> | 55   | 623  | 677  |
| LbrM14_V2.1270 | <i>L. braziliensis</i> | 133  | 203  | 335  |
| LbrM14_V2.1270 | <i>L. braziliensis</i> | 100  | 363  | 462  |
| LbrM14_V2.1270 | <i>L. braziliensis</i> | 117  | 609  | 725  |
| LbrM14_V2.1270 | <i>L. braziliensis</i> | 60   | 764  | 823  |
| LbrM14_V2.1270 | <i>L. braziliensis</i> | 40   | 891  | 930  |
| LbrM14_V2.1290 | <i>L. braziliensis</i> | 42   | 170  | 211  |
| LbrM14_V2.1320 | <i>L. braziliensis</i> | 65   | 66   | 130  |
| LbrM14_V2.1340 | <i>L. braziliensis</i> | 69   | 40   | 108  |
| LbrM14_V2.1340 | <i>L. braziliensis</i> | 145  | 174  | 318  |
| LbrM14_V2.1340 | <i>L. braziliensis</i> | 48   | 370  | 417  |

|                |                        |     |      |      |
|----------------|------------------------|-----|------|------|
| LbrM14_V2.1340 | <i>L. braziliensis</i> | 161 | 591  | 751  |
| LbrM14_V2.1340 | <i>L. braziliensis</i> | 58  | 789  | 846  |
| LbrM14_V2.1350 | <i>L. braziliensis</i> | 60  | 432  | 491  |
| LbrM14_V2.1350 | <i>L. braziliensis</i> | 146 | 564  | 709  |
| LbrM14_V2.1380 | <i>L. braziliensis</i> | 77  | 80   | 156  |
| LbrM14_V2.1390 | <i>L. braziliensis</i> | 62  | 41   | 102  |
| LbrM14_V2.1390 | <i>L. braziliensis</i> | 68  | 139  | 206  |
| LbrM14_V2.1390 | <i>L. braziliensis</i> | 137 | 234  | 370  |
| LbrM14_V2.1390 | <i>L. braziliensis</i> | 86  | 455  | 540  |
| LbrM14_V2.1390 | <i>L. braziliensis</i> | 134 | 597  | 730  |
| LbrM14_V2.1390 | <i>L. braziliensis</i> | 95  | 848  | 942  |
| LbrM14_V2.1400 | <i>L. braziliensis</i> | 52  | 303  | 354  |
| LbrM14_V2.1400 | <i>L. braziliensis</i> | 57  | 402  | 458  |
| LbrM14_V2.1410 | <i>L. braziliensis</i> | 66  | 122  | 187  |
| LbrM14_V2.1410 | <i>L. braziliensis</i> | 42  | 245  | 286  |
| LbrM14_V2.1410 | <i>L. braziliensis</i> | 42  | 245  | 286  |
| LbrM14_V2.1430 | <i>L. braziliensis</i> | 47  | 1    | 47   |
| LbrM14_V2.1440 | <i>L. braziliensis</i> | 57  | 66   | 122  |
| LbrM14_V2.1450 | <i>L. braziliensis</i> | 41  | 68   | 108  |
| LbrM14_V2.1450 | <i>L. braziliensis</i> | 58  | 282  | 339  |
| LbrM14_V2.1450 | <i>L. braziliensis</i> | 51  | 351  | 401  |
| LbrM14_V2.1450 | <i>L. braziliensis</i> | 44  | 450  | 493  |
| LbrM14_V2.1460 | <i>L. braziliensis</i> | 93  | 1    | 93   |
| LbrM14_V2.1460 | <i>L. braziliensis</i> | 50  | 170  | 219  |
| LbrM14_V2.1460 | <i>L. braziliensis</i> | 80  | 253  | 332  |
| LbrM14_V2.1460 | <i>L. braziliensis</i> | 65  | 352  | 416  |
| LbrM14_V2.1460 | <i>L. braziliensis</i> | 371 | 436  | 806  |
| LbrM14_V2.1470 | <i>L. braziliensis</i> | 57  | 1    | 57   |
| LbrM14_V2.1470 | <i>L. braziliensis</i> | 50  | 105  | 154  |
| LbrM14_V2.1470 | <i>L. braziliensis</i> | 329 | 385  | 713  |
| LbrM14_V2.1480 | <i>L. braziliensis</i> | 225 | 19   | 243  |
| LbrM14_V2.1480 | <i>L. braziliensis</i> | 42  | 268  | 309  |
| LbrM14_V2.1480 | <i>L. braziliensis</i> | 42  | 268  | 309  |
| LbrM14_V2.1500 | <i>L. braziliensis</i> | 171 | 345  | 515  |
| LbrM14_V2.1520 | <i>L. braziliensis</i> | 47  | 1    | 47   |
| LbrM14_V2.1520 | <i>L. braziliensis</i> | 101 | 93   | 193  |
| LbrM14_V2.1520 | <i>L. braziliensis</i> | 77  | 243  | 319  |
| LbrM14_V2.1520 | <i>L. braziliensis</i> | 46  | 463  | 508  |
| LbrM14_V2.1570 | <i>L. braziliensis</i> | 69  | 29   | 97   |
| LbrM14_V2.1570 | <i>L. braziliensis</i> | 61  | 356  | 416  |
| LbrM14_V2.1570 | <i>L. braziliensis</i> | 61  | 356  | 416  |
| LbrM14_V2.1600 | <i>L. braziliensis</i> | 256 | 294  | 549  |
| LbrM14_V2.1620 | <i>L. braziliensis</i> | 125 | 777  | 901  |
| LbrM14_V2.1620 | <i>L. braziliensis</i> | 106 | 942  | 1047 |
| LbrM14_V2.1620 | <i>L. braziliensis</i> | 155 | 1150 | 1304 |
| LbrM14_V2.1620 | <i>L. braziliensis</i> | 114 | 1408 | 1521 |
| LbrM14_V2.1630 | <i>L. braziliensis</i> | 125 | 1    | 125  |

|                |                        |      |     |      |
|----------------|------------------------|------|-----|------|
| LbrM14_V2.1630 | <i>L. braziliensis</i> | 361  | 558 | 918  |
| LbrM14_V2.1660 | <i>L. braziliensis</i> | 154  | 33  | 186  |
| LbrM14_V2.1660 | <i>L. braziliensis</i> | 68   | 237 | 304  |
| LbrM14_V2.1660 | <i>L. braziliensis</i> | 58   | 343 | 400  |
| LbrM14_V2.1680 | <i>L. braziliensis</i> | 45   | 728 | 772  |
| LbrM14_V2.1690 | <i>L. braziliensis</i> | 1423 | 1   | 1423 |
| LbrM15_V2.0010 | <i>L. braziliensis</i> | 42   | 1   | 42   |
| LbrM15_V2.0050 | <i>L. braziliensis</i> | 42   | 234 | 275  |
| LbrM15_V2.0060 | <i>L. braziliensis</i> | 108  | 1   | 108  |
| LbrM15_V2.0060 | <i>L. braziliensis</i> | 69   | 262 | 330  |
| LbrM15_V2.0060 | <i>L. braziliensis</i> | 168  | 430 | 597  |
| LbrM15_V2.0070 | <i>L. braziliensis</i> | 142  | 117 | 258  |
| LbrM15_V2.0070 | <i>L. braziliensis</i> | 135  | 333 | 467  |
| LbrM15_V2.0080 | <i>L. braziliensis</i> | 40   | 64  | 103  |
| LbrM15_V2.0080 | <i>L. braziliensis</i> | 57   | 205 | 261  |
| LbrM15_V2.0080 | <i>L. braziliensis</i> | 45   | 277 | 321  |
| LbrM15_V2.0090 | <i>L. braziliensis</i> | 43   | 1   | 43   |
| LbrM15_V2.0090 | <i>L. braziliensis</i> | 44   | 139 | 182  |
| LbrM15_V2.0090 | <i>L. braziliensis</i> | 45   | 188 | 232  |
| LbrM15_V2.0110 | <i>L. braziliensis</i> | 40   | 75  | 114  |
| LbrM15_V2.0110 | <i>L. braziliensis</i> | 58   | 201 | 258  |
| LbrM15_V2.0110 | <i>L. braziliensis</i> | 61   | 322 | 382  |
| LbrM15_V2.0110 | <i>L. braziliensis</i> | 55   | 656 | 710  |
| LbrM15_V2.0130 | <i>L. braziliensis</i> | 65   | 273 | 337  |
| LbrM15_V2.0130 | <i>L. braziliensis</i> | 171  | 513 | 683  |
| LbrM15_V2.0140 | <i>L. braziliensis</i> | 65   | 68  | 132  |
| LbrM15_V2.0150 | <i>L. braziliensis</i> | 222  | 1   | 222  |
| LbrM15_V2.0150 | <i>L. braziliensis</i> | 89   | 250 | 338  |
| LbrM15_V2.0150 | <i>L. braziliensis</i> | 167  | 352 | 518  |
| LbrM15_V2.0150 | <i>L. braziliensis</i> | 53   | 559 | 611  |
| LbrM15_V2.0150 | <i>L. braziliensis</i> | 52   | 638 | 689  |
| LbrM15_V2.0160 | <i>L. braziliensis</i> | 102  | 1   | 102  |
| LbrM15_V2.0170 | <i>L. braziliensis</i> | 331  | 25  | 355  |
| LbrM15_V2.0170 | <i>L. braziliensis</i> | 71   | 726 | 796  |
| LbrM15_V2.0180 | <i>L. braziliensis</i> | 317  | 1   | 317  |
| LbrM15_V2.0180 | <i>L. braziliensis</i> | 119  | 348 | 466  |
| LbrM15_V2.0180 | <i>L. braziliensis</i> | 176  | 493 | 668  |
| LbrM15_V2.0200 | <i>L. braziliensis</i> | 159  | 1   | 159  |
| LbrM15_V2.0210 | <i>L. braziliensis</i> | 46   | 177 | 222  |
| LbrM15_V2.0220 | <i>L. braziliensis</i> | 78   | 203 | 280  |
| LbrM15_V2.0220 | <i>L. braziliensis</i> | 148  | 317 | 464  |
| LbrM15_V2.0240 | <i>L. braziliensis</i> | 52   | 218 | 269  |
| LbrM15_V2.0280 | <i>L. braziliensis</i> | 185  | 1   | 185  |
| LbrM15_V2.0280 | <i>L. braziliensis</i> | 114  | 248 | 361  |
| LbrM15_V2.0280 | <i>L. braziliensis</i> | 75   | 405 | 479  |
| LbrM15_V2.0280 | <i>L. braziliensis</i> | 85   | 493 | 577  |
| LbrM15_V2.0280 | <i>L. braziliensis</i> | 76   | 658 | 733  |

|                |                        |      |      |      |
|----------------|------------------------|------|------|------|
| LbrM15_V2.0280 | <i>L. braziliensis</i> | 54   | 812  | 865  |
| LbrM15_V2.0280 | <i>L. braziliensis</i> | 75   | 900  | 974  |
| LbrM15_V2.0280 | <i>L. braziliensis</i> | 49   | 1326 | 1374 |
| LbrM15_V2.0280 | <i>L. braziliensis</i> | 49   | 1539 | 1587 |
| LbrM15_V2.0280 | <i>L. braziliensis</i> | 70   | 1643 | 1712 |
| LbrM15_V2.0290 | <i>L. braziliensis</i> | 181  | 42   | 222  |
| LbrM15_V2.0290 | <i>L. braziliensis</i> | 41   | 269  | 309  |
| LbrM15_V2.0290 | <i>L. braziliensis</i> | 80   | 391  | 470  |
| LbrM15_V2.0310 | <i>L. braziliensis</i> | 42   | 146  | 187  |
| LbrM15_V2.0320 | <i>L. braziliensis</i> | 42   | 146  | 187  |
| LbrM15_V2.0330 | <i>L. braziliensis</i> | 53   | 64   | 116  |
| LbrM15_V2.0330 | <i>L. braziliensis</i> | 216  | 579  | 794  |
| LbrM15_V2.0350 | <i>L. braziliensis</i> | 67   | 1    | 67   |
| LbrM15_V2.0350 | <i>L. braziliensis</i> | 137  | 132  | 268  |
| LbrM15_V2.0350 | <i>L. braziliensis</i> | 232  | 351  | 582  |
| LbrM15_V2.0360 | <i>L. braziliensis</i> | 52   | 101  | 152  |
| LbrM15_V2.0360 | <i>L. braziliensis</i> | 90   | 167  | 256  |
| LbrM15_V2.0360 | <i>L. braziliensis</i> | 47   | 270  | 316  |
| LbrM15_V2.0360 | <i>L. braziliensis</i> | 71   | 620  | 690  |
| LbrM15_V2.0370 | <i>L. braziliensis</i> | 328  | 90   | 417  |
| LbrM15_V2.0370 | <i>L. braziliensis</i> | 87   | 451  | 537  |
| LbrM15_V2.0370 | <i>L. braziliensis</i> | 93   | 781  | 873  |
| LbrM15_V2.0370 | <i>L. braziliensis</i> | 52   | 893  | 944  |
| LbrM15_V2.0390 | <i>L. braziliensis</i> | 42   | 1    | 42   |
| LbrM15_V2.0390 | <i>L. braziliensis</i> | 61   | 269  | 329  |
| LbrM15_V2.0400 | <i>L. braziliensis</i> | 51   | 1    | 51   |
| LbrM15_V2.0400 | <i>L. braziliensis</i> | 56   | 206  | 261  |
| LbrM15_V2.0400 | <i>L. braziliensis</i> | 45   | 276  | 320  |
| LbrM15_V2.0400 | <i>L. braziliensis</i> | 73   | 507  | 579  |
| LbrM15_V2.0400 | <i>L. braziliensis</i> | 40   | 615  | 654  |
| LbrM15_V2.0400 | <i>L. braziliensis</i> | 92   | 755  | 846  |
| LbrM15_V2.0400 | <i>L. braziliensis</i> | 59   | 905  | 963  |
| LbrM15_V2.0420 | <i>L. braziliensis</i> | 55   | 125  | 179  |
| LbrM15_V2.0420 | <i>L. braziliensis</i> | 81   | 225  | 305  |
| LbrM15_V2.0420 | <i>L. braziliensis</i> | 81   | 225  | 305  |
| LbrM15_V2.0430 | <i>L. braziliensis</i> | 58   | 406  | 463  |
| LbrM15_V2.0450 | <i>L. braziliensis</i> | 104  | 163  | 266  |
| LbrM15_V2.0460 | <i>L. braziliensis</i> | 147  | 1    | 147  |
| LbrM15_V2.0460 | <i>L. braziliensis</i> | 63   | 169  | 231  |
| LbrM15_V2.0460 | <i>L. braziliensis</i> | 328  | 281  | 608  |
| LbrM15_V2.0460 | <i>L. braziliensis</i> | 70   | 621  | 690  |
| LbrM15_V2.0460 | <i>L. braziliensis</i> | 1428 | 705  | 2132 |
| LbrM15_V2.0470 | <i>L. braziliensis</i> | 82   | 1    | 82   |
| LbrM15_V2.0470 | <i>L. braziliensis</i> | 198  | 185  | 382  |
| LbrM15_V2.0470 | <i>L. braziliensis</i> | 200  | 413  | 612  |
| LbrM15_V2.0470 | <i>L. braziliensis</i> | 99   | 642  | 740  |
| LbrM15_V2.0470 | <i>L. braziliensis</i> | 52   | 843  | 894  |

|                |                        |     |      |      |
|----------------|------------------------|-----|------|------|
| LbrM15_V2.0480 | <i>L. braziliensis</i> | 56  | 34   | 89   |
| LbrM15_V2.0480 | <i>L. braziliensis</i> | 85  | 329  | 413  |
| LbrM15_V2.0480 | <i>L. braziliensis</i> | 69  | 529  | 597  |
| LbrM15_V2.0480 | <i>L. braziliensis</i> | 110 | 922  | 1031 |
| LbrM15_V2.0480 | <i>L. braziliensis</i> | 74  | 1053 | 1126 |
| LbrM15_V2.0480 | <i>L. braziliensis</i> | 384 | 1130 | 1513 |
| LbrM15_V2.0480 | <i>L. braziliensis</i> | 61  | 1573 | 1633 |
| LbrM15_V2.0480 | <i>L. braziliensis</i> | 48  | 1735 | 1782 |
| LbrM15_V2.0480 | <i>L. braziliensis</i> | 151 | 1931 | 2081 |
| LbrM15_V2.0490 | <i>L. braziliensis</i> | 216 | 1    | 216  |
| LbrM15_V2.0490 | <i>L. braziliensis</i> | 143 | 232  | 374  |
| LbrM15_V2.0490 | <i>L. braziliensis</i> | 58  | 446  | 503  |
| LbrM15_V2.0490 | <i>L. braziliensis</i> | 42  | 528  | 569  |
| LbrM15_V2.0500 | <i>L. braziliensis</i> | 360 | 166  | 525  |
| LbrM15_V2.0500 | <i>L. braziliensis</i> | 101 | 544  | 644  |
| LbrM15_V2.0500 | <i>L. braziliensis</i> | 80  | 821  | 900  |
| LbrM15_V2.0510 | <i>L. braziliensis</i> | 109 | 32   | 140  |
| LbrM15_V2.0510 | <i>L. braziliensis</i> | 84  | 144  | 227  |
| LbrM15_V2.0510 | <i>L. braziliensis</i> | 95  | 264  | 358  |
| LbrM15_V2.0510 | <i>L. braziliensis</i> | 101 | 769  | 869  |
| LbrM15_V2.0510 | <i>L. braziliensis</i> | 92  | 916  | 1007 |
| LbrM15_V2.0510 | <i>L. braziliensis</i> | 84  | 1073 | 1156 |
| LbrM15_V2.0510 | <i>L. braziliensis</i> | 185 | 1158 | 1342 |
| LbrM15_V2.0530 | <i>L. braziliensis</i> | 112 | 1    | 112  |
| LbrM15_V2.0530 | <i>L. braziliensis</i> | 54  | 119  | 172  |
| LbrM15_V2.0530 | <i>L. braziliensis</i> | 56  | 212  | 267  |
| LbrM15_V2.0530 | <i>L. braziliensis</i> | 181 | 280  | 460  |
| LbrM15_V2.0550 | <i>L. braziliensis</i> | 177 | 133  | 309  |
| LbrM15_V2.0560 | <i>L. braziliensis</i> | 589 | 1    | 589  |
| LbrM15_V2.0560 | <i>L. braziliensis</i> | 66  | 671  | 736  |
| LbrM15_V2.0560 | <i>L. braziliensis</i> | 241 | 785  | 1025 |
| LbrM15_V2.0560 | <i>L. braziliensis</i> | 311 | 1083 | 1393 |
| LbrM15_V2.0560 | <i>L. braziliensis</i> | 41  | 1736 | 1776 |
| LbrM15_V2.0560 | <i>L. braziliensis</i> | 50  | 1810 | 1859 |
| LbrM15_V2.0570 | <i>L. braziliensis</i> | 54  | 1    | 54   |
| LbrM15_V2.0570 | <i>L. braziliensis</i> | 114 | 189  | 302  |
| LbrM15_V2.0570 | <i>L. braziliensis</i> | 137 | 321  | 457  |
| LbrM15_V2.0570 | <i>L. braziliensis</i> | 81  | 549  | 629  |
| LbrM15_V2.0570 | <i>L. braziliensis</i> | 47  | 632  | 678  |
| LbrM15_V2.0580 | <i>L. braziliensis</i> | 80  | 1    | 80   |
| LbrM15_V2.0580 | <i>L. braziliensis</i> | 63  | 122  | 184  |
| LbrM15_V2.0580 | <i>L. braziliensis</i> | 80  | 479  | 558  |
| LbrM15_V2.0580 | <i>L. braziliensis</i> | 41  | 561  | 601  |
| LbrM15_V2.0580 | <i>L. braziliensis</i> | 223 | 619  | 841  |
| LbrM15_V2.0580 | <i>L. braziliensis</i> | 95  | 888  | 982  |
| LbrM15_V2.0580 | <i>L. braziliensis</i> | 58  | 1004 | 1061 |
| LbrM15_V2.0580 | <i>L. braziliensis</i> | 127 | 1337 | 1463 |

|                |                        |     |      |      |
|----------------|------------------------|-----|------|------|
| LbrM15_V2.0580 | <i>L. braziliensis</i> | 43  | 1619 | 1661 |
| LbrM15_V2.0590 | <i>L. braziliensis</i> | 55  | 1    | 55   |
| LbrM15_V2.0590 | <i>L. braziliensis</i> | 71  | 89   | 159  |
| LbrM15_V2.0590 | <i>L. braziliensis</i> | 66  | 179  | 244  |
| LbrM15_V2.0590 | <i>L. braziliensis</i> | 105 | 290  | 394  |
| LbrM15_V2.0590 | <i>L. braziliensis</i> | 128 | 400  | 527  |
| LbrM15_V2.0600 | <i>L. braziliensis</i> | 76  | 103  | 178  |
| LbrM15_V2.0610 | <i>L. braziliensis</i> | 54  | 64   | 117  |
| LbrM15_V2.0610 | <i>L. braziliensis</i> | 69  | 186  | 254  |
| LbrM15_V2.0610 | <i>L. braziliensis</i> | 69  | 186  | 254  |
| LbrM15_V2.0620 | <i>L. braziliensis</i> | 177 | 47   | 223  |
| LbrM15_V2.0630 | <i>L. braziliensis</i> | 425 | 1    | 425  |
| LbrM15_V2.0630 | <i>L. braziliensis</i> | 55  | 430  | 484  |
| LbrM15_V2.0630 | <i>L. braziliensis</i> | 135 | 604  | 738  |
| LbrM15_V2.0630 | <i>L. braziliensis</i> | 323 | 978  | 1300 |
| LbrM15_V2.0630 | <i>L. braziliensis</i> | 93  | 1302 | 1394 |
| LbrM15_V2.0630 | <i>L. braziliensis</i> | 160 | 1460 | 1619 |
| LbrM15_V2.0640 | <i>L. braziliensis</i> | 110 | 15   | 124  |
| LbrM15_V2.0640 | <i>L. braziliensis</i> | 343 | 152  | 494  |
| LbrM15_V2.0640 | <i>L. braziliensis</i> | 460 | 659  | 1118 |
| LbrM15_V2.0650 | <i>L. braziliensis</i> | 45  | 373  | 417  |
| LbrM15_V2.0660 | <i>L. braziliensis</i> | 49  | 1    | 49   |
| LbrM15_V2.0660 | <i>L. braziliensis</i> | 93  | 259  | 351  |
| LbrM15_V2.0670 | <i>L. braziliensis</i> | 224 | 1    | 224  |
| LbrM15_V2.0670 | <i>L. braziliensis</i> | 253 | 239  | 491  |
| LbrM15_V2.0670 | <i>L. braziliensis</i> | 85  | 528  | 612  |
| LbrM15_V2.0670 | <i>L. braziliensis</i> | 79  | 641  | 719  |
| LbrM15_V2.0670 | <i>L. braziliensis</i> | 145 | 787  | 931  |
| LbrM15_V2.0680 | <i>L. braziliensis</i> | 110 | 1    | 110  |
| LbrM15_V2.0680 | <i>L. braziliensis</i> | 71  | 121  | 191  |
| LbrM15_V2.0680 | <i>L. braziliensis</i> | 43  | 226  | 268  |
| LbrM15_V2.0680 | <i>L. braziliensis</i> | 43  | 342  | 384  |
| LbrM15_V2.0680 | <i>L. braziliensis</i> | 82  | 784  | 865  |
| LbrM15_V2.0690 | <i>L. braziliensis</i> | 53  | 1    | 53   |
| LbrM15_V2.0690 | <i>L. braziliensis</i> | 43  | 159  | 201  |
| LbrM15_V2.0690 | <i>L. braziliensis</i> | 43  | 159  | 201  |
| LbrM15_V2.0710 | <i>L. braziliensis</i> | 72  | 266  | 337  |
| LbrM15_V2.0710 | <i>L. braziliensis</i> | 107 | 381  | 487  |
| LbrM15_V2.0710 | <i>L. braziliensis</i> | 82  | 600  | 681  |
| LbrM15_V2.0710 | <i>L. braziliensis</i> | 65  | 760  | 824  |
| LbrM15_V2.0710 | <i>L. braziliensis</i> | 75  | 952  | 1026 |
| LbrM15_V2.0720 | <i>L. braziliensis</i> | 132 | 15   | 146  |
| LbrM15_V2.0720 | <i>L. braziliensis</i> | 119 | 240  | 358  |
| LbrM15_V2.0720 | <i>L. braziliensis</i> | 52  | 418  | 469  |
| LbrM15_V2.0720 | <i>L. braziliensis</i> | 59  | 542  | 600  |
| LbrM15_V2.0720 | <i>L. braziliensis</i> | 77  | 952  | 1028 |
| LbrM15_V2.0720 | <i>L. braziliensis</i> | 57  | 1081 | 1137 |

|                |                        |     |      |      |
|----------------|------------------------|-----|------|------|
| LbrM15_V2.0720 | <i>L. braziliensis</i> | 45  | 1207 | 1251 |
| LbrM15_V2.0720 | <i>L. braziliensis</i> | 71  | 1462 | 1532 |
| LbrM15_V2.0720 | <i>L. braziliensis</i> | 45  | 1564 | 1608 |
| LbrM15_V2.0720 | <i>L. braziliensis</i> | 92  | 1687 | 1778 |
| LbrM15_V2.0720 | <i>L. braziliensis</i> | 46  | 1926 | 1971 |
| LbrM15_V2.0720 | <i>L. braziliensis</i> | 52  | 2098 | 2149 |
| LbrM15_V2.0720 | <i>L. braziliensis</i> | 126 | 2278 | 2403 |
| LbrM15_V2.0720 | <i>L. braziliensis</i> | 80  | 2421 | 2500 |
| LbrM15_V2.0720 | <i>L. braziliensis</i> | 61  | 2546 | 2606 |
| LbrM15_V2.0730 | <i>L. braziliensis</i> | 91  | 17   | 107  |
| LbrM15_V2.0740 | <i>L. braziliensis</i> | 46  | 335  | 380  |
| LbrM15_V2.0750 | <i>L. braziliensis</i> | 274 | 1    | 274  |
| LbrM15_V2.0750 | <i>L. braziliensis</i> | 130 | 297  | 426  |
| LbrM15_V2.0750 | <i>L. braziliensis</i> | 136 | 466  | 601  |
| LbrM15_V2.0750 | <i>L. braziliensis</i> | 197 | 645  | 841  |
| LbrM15_V2.0750 | <i>L. braziliensis</i> | 326 | 848  | 1173 |
| LbrM15_V2.0750 | <i>L. braziliensis</i> | 63  | 1215 | 1277 |
| LbrM15_V2.0750 | <i>L. braziliensis</i> | 49  | 1286 | 1334 |
| LbrM15_V2.0750 | <i>L. braziliensis</i> | 270 | 1362 | 1631 |
| LbrM15_V2.0750 | <i>L. braziliensis</i> | 97  | 1675 | 1771 |
| LbrM15_V2.0750 | <i>L. braziliensis</i> | 118 | 1846 | 1963 |
| LbrM15_V2.0750 | <i>L. braziliensis</i> | 73  | 1979 | 2051 |
| LbrM15_V2.0760 | <i>L. braziliensis</i> | 45  | 350  | 394  |
| LbrM15_V2.0760 | <i>L. braziliensis</i> | 42  | 622  | 663  |
| LbrM15_V2.0760 | <i>L. braziliensis</i> | 93  | 1555 | 1647 |
| LbrM15_V2.0760 | <i>L. braziliensis</i> | 48  | 1731 | 1778 |
| LbrM15_V2.0760 | <i>L. braziliensis</i> | 228 | 1859 | 2086 |
| LbrM15_V2.0770 | <i>L. braziliensis</i> | 81  | 575  | 655  |
| LbrM15_V2.0780 | <i>L. braziliensis</i> | 70  | 16   | 85   |
| LbrM15_V2.0780 | <i>L. braziliensis</i> | 267 | 94   | 360  |
| LbrM15_V2.0790 | <i>L. braziliensis</i> | 242 | 433  | 674  |
| LbrM15_V2.0810 | <i>L. braziliensis</i> | 135 | 1    | 135  |
| LbrM15_V2.0810 | <i>L. braziliensis</i> | 156 | 163  | 318  |
| LbrM15_V2.0810 | <i>L. braziliensis</i> | 136 | 345  | 480  |
| LbrM15_V2.0810 | <i>L. braziliensis</i> | 75  | 571  | 645  |
| LbrM15_V2.0820 | <i>L. braziliensis</i> | 163 | 1009 | 1171 |
| LbrM15_V2.0820 | <i>L. braziliensis</i> | 42  | 1699 | 1740 |
| LbrM15_V2.0820 | <i>L. braziliensis</i> | 60  | 1762 | 1821 |
| LbrM15_V2.0820 | <i>L. braziliensis</i> | 114 | 1835 | 1948 |
| LbrM15_V2.0820 | <i>L. braziliensis</i> | 66  | 2187 | 2252 |
| LbrM15_V2.0820 | <i>L. braziliensis</i> | 42  | 2298 | 2339 |
| LbrM15_V2.0820 | <i>L. braziliensis</i> | 126 | 2381 | 2506 |
| LbrM15_V2.0830 | <i>L. braziliensis</i> | 59  | 1    | 59   |
| LbrM15_V2.0850 | <i>L. braziliensis</i> | 44  | 727  | 770  |
| LbrM15_V2.0850 | <i>L. braziliensis</i> | 40  | 933  | 972  |
| LbrM15_V2.0850 | <i>L. braziliensis</i> | 40  | 933  | 972  |
| LbrM15_V2.0860 | <i>L. braziliensis</i> | 127 | 1    | 127  |



|                |                        |     |      |      |
|----------------|------------------------|-----|------|------|
| LbrM15_V2.0860 | <i>L. braziliensis</i> | 89  | 156  | 244  |
| LbrM15_V2.0860 | <i>L. braziliensis</i> | 49  | 308  | 356  |
| LbrM15_V2.0870 | <i>L. braziliensis</i> | 120 | 1    | 120  |
| LbrM15_V2.0870 | <i>L. braziliensis</i> | 196 | 195  | 390  |
| LbrM15_V2.0870 | <i>L. braziliensis</i> | 390 | 449  | 838  |
| LbrM15_V2.0880 | <i>L. braziliensis</i> | 157 | 1    | 157  |
| LbrM15_V2.0880 | <i>L. braziliensis</i> | 56  | 221  | 276  |
| LbrM15_V2.0880 | <i>L. braziliensis</i> | 44  | 441  | 484  |
| LbrM15_V2.0880 | <i>L. braziliensis</i> | 60  | 494  | 553  |
| LbrM15_V2.0880 | <i>L. braziliensis</i> | 42  | 712  | 753  |
| LbrM15_V2.0890 | <i>L. braziliensis</i> | 244 | 54   | 297  |
| LbrM15_V2.0900 | <i>L. braziliensis</i> | 59  | 1    | 59   |
| LbrM15_V2.0900 | <i>L. braziliensis</i> | 59  | 343  | 401  |
| LbrM15_V2.0900 | <i>L. braziliensis</i> | 59  | 343  | 401  |
| LbrM15_V2.0910 | <i>L. braziliensis</i> | 84  | 141  | 224  |
| LbrM15_V2.0920 | <i>L. braziliensis</i> | 88  | 154  | 241  |
| LbrM15_V2.0930 | <i>L. braziliensis</i> | 55  | 1    | 55   |
| LbrM15_V2.0940 | <i>L. braziliensis</i> | 60  | 123  | 182  |
| LbrM15_V2.0950 | <i>L. braziliensis</i> | 127 | 60   | 186  |
| LbrM15_V2.0950 | <i>L. braziliensis</i> | 48  | 224  | 271  |
| LbrM15_V2.0950 | <i>L. braziliensis</i> | 159 | 335  | 493  |
| LbrM15_V2.0950 | <i>L. braziliensis</i> | 147 | 531  | 677  |
| LbrM15_V2.0950 | <i>L. braziliensis</i> | 41  | 714  | 754  |
| LbrM15_V2.0950 | <i>L. braziliensis</i> | 116 | 849  | 964  |
| LbrM15_V2.0950 | <i>L. braziliensis</i> | 56  | 1113 | 1168 |
| LbrM15_V2.0950 | <i>L. braziliensis</i> | 429 | 1268 | 1696 |
| LbrM15_V2.0950 | <i>L. braziliensis</i> | 85  | 1804 | 1888 |
| LbrM15_V2.0950 | <i>L. braziliensis</i> | 57  | 2019 | 2075 |
| LbrM15_V2.0950 | <i>L. braziliensis</i> | 50  | 2101 | 2150 |
| LbrM15_V2.0950 | <i>L. braziliensis</i> | 94  | 2196 | 2289 |
| LbrM15_V2.0950 | <i>L. braziliensis</i> | 41  | 2372 | 2412 |
| LbrM15_V2.0950 | <i>L. braziliensis</i> | 74  | 2481 | 2554 |
| LbrM15_V2.0960 | <i>L. braziliensis</i> | 179 | 1    | 179  |
| LbrM15_V2.0960 | <i>L. braziliensis</i> | 83  | 580  | 662  |
| LbrM15_V2.0980 | <i>L. braziliensis</i> | 55  | 1    | 55   |
| LbrM15_V2.0980 | <i>L. braziliensis</i> | 56  | 147  | 202  |
| LbrM15_V2.0980 | <i>L. braziliensis</i> | 88  | 219  | 306  |
| LbrM15_V2.0980 | <i>L. braziliensis</i> | 200 | 338  | 537  |
| LbrM15_V2.0980 | <i>L. braziliensis</i> | 73  | 600  | 672  |
| LbrM15_V2.0980 | <i>L. braziliensis</i> | 64  | 679  | 742  |
| LbrM15_V2.0980 | <i>L. braziliensis</i> | 55  | 827  | 881  |
| LbrM15_V2.0980 | <i>L. braziliensis</i> | 40  | 925  | 964  |
| LbrM15_V2.0980 | <i>L. braziliensis</i> | 232 | 997  | 1228 |
| LbrM15_V2.1000 | <i>L. braziliensis</i> | 175 | 120  | 294  |
| LbrM15_V2.1010 | <i>L. braziliensis</i> | 115 | 278  | 392  |
| LbrM15_V2.1020 | <i>L. braziliensis</i> | 135 | 215  | 349  |
| LbrM15_V2.1020 | <i>L. braziliensis</i> | 195 | 445  | 639  |

|                |                        |     |      |      |
|----------------|------------------------|-----|------|------|
| LbrM15_V2.1040 | <i>L. braziliensis</i> | 74  | 87   | 160  |
| LbrM15_V2.1050 | <i>L. braziliensis</i> | 73  | 660  | 732  |
| LbrM15_V2.1070 | <i>L. braziliensis</i> | 117 | 18   | 134  |
| LbrM15_V2.1070 | <i>L. braziliensis</i> | 195 | 157  | 351  |
| LbrM15_V2.1070 | <i>L. braziliensis</i> | 58  | 364  | 421  |
| LbrM15_V2.1090 | <i>L. braziliensis</i> | 54  | 63   | 116  |
| LbrM15_V2.1110 | <i>L. braziliensis</i> | 41  | 50   | 90   |
| LbrM15_V2.1110 | <i>L. braziliensis</i> | 42  | 294  | 335  |
| LbrM15_V2.1110 | <i>L. braziliensis</i> | 57  | 372  | 428  |
| LbrM15_V2.1120 | <i>L. braziliensis</i> | 40  | 213  | 252  |
| LbrM15_V2.1120 | <i>L. braziliensis</i> | 52  | 449  | 500  |
| LbrM15_V2.1120 | <i>L. braziliensis</i> | 174 | 534  | 707  |
| LbrM15_V2.1120 | <i>L. braziliensis</i> | 49  | 818  | 866  |
| LbrM15_V2.1120 | <i>L. braziliensis</i> | 46  | 1088 | 1133 |
| LbrM15_V2.1120 | <i>L. braziliensis</i> | 47  | 1731 | 1777 |
| LbrM15_V2.1120 | <i>L. braziliensis</i> | 83  | 1836 | 1918 |
| LbrM15_V2.1120 | <i>L. braziliensis</i> | 68  | 2288 | 2355 |
| LbrM15_V2.1120 | <i>L. braziliensis</i> | 44  | 2430 | 2473 |
| LbrM15_V2.1120 | <i>L. braziliensis</i> | 192 | 2509 | 2700 |
| LbrM15_V2.1120 | <i>L. braziliensis</i> | 407 | 2707 | 3113 |
| LbrM15_V2.1120 | <i>L. braziliensis</i> | 88  | 3148 | 3235 |
| LbrM15_V2.1130 | <i>L. braziliensis</i> | 76  | 29   | 104  |
| LbrM15_V2.1130 | <i>L. braziliensis</i> | 73  | 770  | 842  |
| LbrM15_V2.1140 | <i>L. braziliensis</i> | 140 | 1    | 140  |
| LbrM15_V2.1140 | <i>L. braziliensis</i> | 206 | 176  | 381  |
| LbrM15_V2.1140 | <i>L. braziliensis</i> | 71  | 1025 | 1095 |
| LbrM15_V2.1140 | <i>L. braziliensis</i> | 99  | 1105 | 1203 |
| LbrM15_V2.1140 | <i>L. braziliensis</i> | 356 | 1602 | 1957 |
| LbrM15_V2.1140 | <i>L. braziliensis</i> | 65  | 1961 | 2025 |
| LbrM15_V2.1140 | <i>L. braziliensis</i> | 271 | 2072 | 2342 |
| LbrM15_V2.1140 | <i>L. braziliensis</i> | 397 | 2358 | 2754 |
| LbrM15_V2.1150 | <i>L. braziliensis</i> | 66  | 47   | 112  |
| LbrM15_V2.1160 | <i>L. braziliensis</i> | 59  | 367  | 425  |
| LbrM15_V2.1170 | <i>L. braziliensis</i> | 45  | 47   | 91   |
| LbrM15_V2.1170 | <i>L. braziliensis</i> | 71  | 149  | 219  |
| LbrM15_V2.1170 | <i>L. braziliensis</i> | 53  | 232  | 284  |
| LbrM15_V2.1200 | <i>L. braziliensis</i> | 55  | 337  | 391  |
| LbrM15_V2.1210 | <i>L. braziliensis</i> | 89  | 222  | 310  |
| LbrM15_V2.1210 | <i>L. braziliensis</i> | 60  | 427  | 486  |
| LbrM15_V2.1220 | <i>L. braziliensis</i> | 90  | 74   | 163  |
| LbrM15_V2.1220 | <i>L. braziliensis</i> | 157 | 215  | 371  |
| LbrM15_V2.1220 | <i>L. braziliensis</i> | 67  | 374  | 440  |
| LbrM15_V2.1220 | <i>L. braziliensis</i> | 321 | 467  | 787  |
| LbrM15_V2.1220 | <i>L. braziliensis</i> | 214 | 790  | 1003 |
| LbrM15_V2.1220 | <i>L. braziliensis</i> | 106 | 1178 | 1283 |
| LbrM15_V2.1220 | <i>L. braziliensis</i> | 143 | 1423 | 1565 |
| LbrM15_V2.1220 | <i>L. braziliensis</i> | 46  | 1722 | 1767 |

|                |                        |     |      |      |
|----------------|------------------------|-----|------|------|
| LbrM15_V2.1230 | <i>L. braziliensis</i> | 111 | 1118 | 1228 |
| LbrM15_V2.1240 | <i>L. braziliensis</i> | 125 | 800  | 924  |
| LbrM15_V2.1260 | <i>L. braziliensis</i> | 85  | 1    | 85   |
| LbrM15_V2.1260 | <i>L. braziliensis</i> | 123 | 91   | 213  |
| LbrM15_V2.1260 | <i>L. braziliensis</i> | 126 | 225  | 350  |
| LbrM15_V2.1260 | <i>L. braziliensis</i> | 67  | 411  | 477  |
| LbrM15_V2.1270 | <i>L. braziliensis</i> | 43  | 1    | 43   |
| LbrM15_V2.1270 | <i>L. braziliensis</i> | 276 | 53   | 328  |
| LbrM15_V2.1270 | <i>L. braziliensis</i> | 82  | 367  | 448  |
| LbrM15_V2.1270 | <i>L. braziliensis</i> | 43  | 582  | 624  |
| LbrM15_V2.1270 | <i>L. braziliensis</i> | 129 | 735  | 863  |
| LbrM15_V2.1270 | <i>L. braziliensis</i> | 46  | 1077 | 1122 |
| LbrM15_V2.1270 | <i>L. braziliensis</i> | 287 | 1202 | 1488 |
| LbrM15_V2.1290 | <i>L. braziliensis</i> | 96  | 123  | 218  |
| LbrM15_V2.1310 | <i>L. braziliensis</i> | 49  | 1    | 49   |
| LbrM15_V2.1310 | <i>L. braziliensis</i> | 251 | 81   | 331  |
| LbrM15_V2.1320 | <i>L. braziliensis</i> | 48  | 1    | 48   |
| LbrM15_V2.1320 | <i>L. braziliensis</i> | 98  | 77   | 174  |
| LbrM15_V2.1320 | <i>L. braziliensis</i> | 98  | 77   | 174  |
| LbrM15_V2.1330 | <i>L. braziliensis</i> | 108 | 10   | 117  |
| LbrM15_V2.1330 | <i>L. braziliensis</i> | 73  | 401  | 473  |
| LbrM15_V2.1340 | <i>L. braziliensis</i> | 59  | 1    | 59   |
| LbrM15_V2.1350 | <i>L. braziliensis</i> | 41  | 180  | 220  |
| LbrM15_V2.1380 | <i>L. braziliensis</i> | 90  | 355  | 444  |
| LbrM15_V2.1400 | <i>L. braziliensis</i> | 67  | 212  | 278  |
| LbrM15_V2.1410 | <i>L. braziliensis</i> | 154 | 338  | 491  |
| LbrM15_V2.1420 | <i>L. braziliensis</i> | 74  | 133  | 206  |
| LbrM15_V2.1420 | <i>L. braziliensis</i> | 49  | 957  | 1005 |
| LbrM15_V2.1420 | <i>L. braziliensis</i> | 49  | 957  | 1005 |
| LbrM15_V2.1430 | <i>L. braziliensis</i> | 43  | 190  | 232  |
| LbrM15_V2.1440 | <i>L. braziliensis</i> | 42  | 231  | 272  |
| LbrM15_V2.1460 | <i>L. braziliensis</i> | 44  | 82   | 125  |
| LbrM15_V2.1490 | <i>L. braziliensis</i> | 44  | 1    | 44   |
| LbrM15_V2.1490 | <i>L. braziliensis</i> | 79  | 104  | 182  |
| LbrM15_V2.1490 | <i>L. braziliensis</i> | 244 | 375  | 618  |
| LbrM15_V2.1540 | <i>L. braziliensis</i> | 55  | 362  | 416  |
| LbrM15_V2.1550 | <i>L. braziliensis</i> | 102 | 197  | 298  |
| LbrM15_V2.1570 | <i>L. braziliensis</i> | 53  | 503  | 555  |
| LbrM15_V2.1570 | <i>L. braziliensis</i> | 49  | 1209 | 1257 |
| LbrM15_V2.1570 | <i>L. braziliensis</i> | 49  | 1209 | 1257 |
| LbrM15_V2.1580 | <i>L. braziliensis</i> | 236 | 308  | 543  |
| LbrM16_V2.0060 | <i>L. braziliensis</i> | 51  | 183  | 233  |
| LbrM16_V2.0060 | <i>L. braziliensis</i> | 40  | 270  | 309  |
| LbrM16_V2.0060 | <i>L. braziliensis</i> | 48  | 535  | 582  |
| LbrM16_V2.0070 | <i>L. braziliensis</i> | 78  | 882  | 959  |
| LbrM16_V2.0090 | <i>L. braziliensis</i> | 76  | 1    | 76   |
| LbrM16_V2.0090 | <i>L. braziliensis</i> | 65  | 379  | 443  |

|                |                        |     |      |      |
|----------------|------------------------|-----|------|------|
| LbrM16_V2.0090 | <i>L. braziliensis</i> | 82  | 508  | 589  |
| LbrM16_V2.0090 | <i>L. braziliensis</i> | 81  | 651  | 731  |
| LbrM16_V2.0100 | <i>L. braziliensis</i> | 44  | 367  | 410  |
| LbrM16_V2.0120 | <i>L. braziliensis</i> | 51  | 579  | 629  |
| LbrM16_V2.0130 | <i>L. braziliensis</i> | 60  | 198  | 257  |
| LbrM16_V2.0130 | <i>L. braziliensis</i> | 51  | 497  | 547  |
| LbrM16_V2.0130 | <i>L. braziliensis</i> | 51  | 497  | 547  |
| LbrM16_V2.0140 | <i>L. braziliensis</i> | 57  | 1    | 57   |
| LbrM16_V2.0140 | <i>L. braziliensis</i> | 95  | 74   | 168  |
| LbrM16_V2.0140 | <i>L. braziliensis</i> | 60  | 171  | 230  |
| LbrM16_V2.0150 | <i>L. braziliensis</i> | 40  | 1    | 40   |
| LbrM16_V2.0150 | <i>L. braziliensis</i> | 53  | 116  | 168  |
| LbrM16_V2.0150 | <i>L. braziliensis</i> | 53  | 116  | 168  |
| LbrM16_V2.0160 | <i>L. braziliensis</i> | 59  | 87   | 145  |
| LbrM16_V2.0160 | <i>L. braziliensis</i> | 141 | 184  | 324  |
| LbrM16_V2.0170 | <i>L. braziliensis</i> | 57  | 249  | 305  |
| LbrM16_V2.0180 | <i>L. braziliensis</i> | 115 | 142  | 256  |
| LbrM16_V2.0180 | <i>L. braziliensis</i> | 89  | 301  | 389  |
| LbrM16_V2.0180 | <i>L. braziliensis</i> | 231 | 1123 | 1353 |
| LbrM16_V2.0180 | <i>L. braziliensis</i> | 284 | 1511 | 1794 |
| LbrM16_V2.0180 | <i>L. braziliensis</i> | 47  | 1942 | 1988 |
| LbrM16_V2.0180 | <i>L. braziliensis</i> | 51  | 2002 | 2052 |
| LbrM16_V2.0180 | <i>L. braziliensis</i> | 55  | 2305 | 2359 |
| LbrM16_V2.0180 | <i>L. braziliensis</i> | 63  | 2396 | 2458 |
| LbrM16_V2.0180 | <i>L. braziliensis</i> | 40  | 2567 | 2606 |
| LbrM16_V2.0180 | <i>L. braziliensis</i> | 105 | 2735 | 2839 |
| LbrM16_V2.0180 | <i>L. braziliensis</i> | 42  | 2918 | 2959 |
| LbrM16_V2.0180 | <i>L. braziliensis</i> | 46  | 3062 | 3107 |
| LbrM16_V2.0180 | <i>L. braziliensis</i> | 71  | 3340 | 3410 |
| LbrM16_V2.0180 | <i>L. braziliensis</i> | 83  | 3447 | 3529 |
| LbrM16_V2.0180 | <i>L. braziliensis</i> | 45  | 3630 | 3674 |
| LbrM16_V2.0180 | <i>L. braziliensis</i> | 74  | 4264 | 4337 |
| LbrM16_V2.0180 | <i>L. braziliensis</i> | 55  | 4379 | 4433 |
| LbrM16_V2.0190 | <i>L. braziliensis</i> | 77  | 1    | 77   |
| LbrM16_V2.0190 | <i>L. braziliensis</i> | 95  | 90   | 184  |
| LbrM16_V2.0200 | <i>L. braziliensis</i> | 70  | 1    | 70   |
| LbrM16_V2.0200 | <i>L. braziliensis</i> | 114 | 244  | 357  |
| LbrM16_V2.0220 | <i>L. braziliensis</i> | 70  | 104  | 173  |
| LbrM16_V2.0230 | <i>L. braziliensis</i> | 51  | 82   | 132  |
| LbrM16_V2.0250 | <i>L. braziliensis</i> | 52  | 110  | 161  |
| LbrM16_V2.0270 | <i>L. braziliensis</i> | 42  | 91   | 132  |
| LbrM16_V2.0280 | <i>L. braziliensis</i> | 48  | 53   | 100  |
| LbrM16_V2.0280 | <i>L. braziliensis</i> | 67  | 140  | 206  |
| LbrM16_V2.0280 | <i>L. braziliensis</i> | 67  | 140  | 206  |
| LbrM16_V2.0290 | <i>L. braziliensis</i> | 50  | 1    | 50   |
| LbrM16_V2.0290 | <i>L. braziliensis</i> | 66  | 88   | 153  |
| LbrM16_V2.0290 | <i>L. braziliensis</i> | 66  | 88   | 153  |

|                |                        |     |      |      |
|----------------|------------------------|-----|------|------|
| LbrM16_V2.0300 | <i>L. braziliensis</i> | 121 | 277  | 397  |
| LbrM16_V2.0300 | <i>L. braziliensis</i> | 52  | 426  | 477  |
| LbrM16_V2.0300 | <i>L. braziliensis</i> | 48  | 484  | 531  |
| LbrM16_V2.0320 | <i>L. braziliensis</i> | 66  | 70   | 135  |
| LbrM16_V2.0320 | <i>L. braziliensis</i> | 72  | 179  | 250  |
| LbrM16_V2.0320 | <i>L. braziliensis</i> | 72  | 179  | 250  |
| LbrM16_V2.0330 | <i>L. braziliensis</i> | 492 | 384  | 875  |
| LbrM16_V2.0330 | <i>L. braziliensis</i> | 223 | 937  | 1159 |
| LbrM16_V2.0340 | <i>L. braziliensis</i> | 42  | 23   | 64   |
| LbrM16_V2.0340 | <i>L. braziliensis</i> | 55  | 133  | 187  |
| LbrM16_V2.0340 | <i>L. braziliensis</i> | 55  | 133  | 187  |
| LbrM16_V2.0360 | <i>L. braziliensis</i> | 70  | 1    | 70   |
| LbrM16_V2.0370 | <i>L. braziliensis</i> | 60  | 17   | 76   |
| LbrM16_V2.0370 | <i>L. braziliensis</i> | 134 | 278  | 411  |
| LbrM16_V2.0370 | <i>L. braziliensis</i> | 156 | 429  | 584  |
| LbrM16_V2.0380 | <i>L. braziliensis</i> | 50  | 73   | 122  |
| LbrM16_V2.0390 | <i>L. braziliensis</i> | 174 | 1    | 174  |
| LbrM16_V2.0390 | <i>L. braziliensis</i> | 58  | 193  | 250  |
| LbrM16_V2.0390 | <i>L. braziliensis</i> | 80  | 437  | 516  |
| LbrM16_V2.0400 | <i>L. braziliensis</i> | 57  | 44   | 100  |
| LbrM16_V2.0400 | <i>L. braziliensis</i> | 52  | 254  | 305  |
| LbrM16_V2.0400 | <i>L. braziliensis</i> | 204 | 657  | 860  |
| LbrM16_V2.0400 | <i>L. braziliensis</i> | 130 | 864  | 993  |
| LbrM16_V2.0410 | <i>L. braziliensis</i> | 48  | 54   | 101  |
| LbrM16_V2.0420 | <i>L. braziliensis</i> | 48  | 77   | 124  |
| LbrM16_V2.0420 | <i>L. braziliensis</i> | 41  | 164  | 204  |
| LbrM16_V2.0420 | <i>L. braziliensis</i> | 143 | 404  | 546  |
| LbrM16_V2.0430 | <i>L. braziliensis</i> | 54  | 1    | 54   |
| LbrM16_V2.0430 | <i>L. braziliensis</i> | 42  | 433  | 474  |
| LbrM16_V2.0430 | <i>L. braziliensis</i> | 42  | 524  | 565  |
| LbrM16_V2.0440 | <i>L. braziliensis</i> | 93  | 1    | 93   |
| LbrM16_V2.0440 | <i>L. braziliensis</i> | 72  | 112  | 183  |
| LbrM16_V2.0450 | <i>L. braziliensis</i> | 43  | 1    | 43   |
| LbrM16_V2.0460 | <i>L. braziliensis</i> | 64  | 1    | 64   |
| LbrM16_V2.0460 | <i>L. braziliensis</i> | 85  | 173  | 257  |
| LbrM16_V2.0460 | <i>L. braziliensis</i> | 92  | 264  | 355  |
| LbrM16_V2.0460 | <i>L. braziliensis</i> | 87  | 362  | 448  |
| LbrM16_V2.0460 | <i>L. braziliensis</i> | 191 | 774  | 964  |
| LbrM16_V2.0460 | <i>L. braziliensis</i> | 66  | 987  | 1052 |
| LbrM16_V2.0460 | <i>L. braziliensis</i> | 141 | 1084 | 1224 |
| LbrM16_V2.0470 | <i>L. braziliensis</i> | 193 | 38   | 230  |
| LbrM16_V2.0470 | <i>L. braziliensis</i> | 66  | 253  | 318  |
| LbrM16_V2.0470 | <i>L. braziliensis</i> | 141 | 350  | 490  |
| LbrM16_V2.0500 | <i>L. braziliensis</i> | 41  | 709  | 749  |
| LbrM16_V2.0530 | <i>L. braziliensis</i> | 49  | 28   | 76   |
| LbrM16_V2.0530 | <i>L. braziliensis</i> | 67  | 141  | 207  |
| LbrM16_V2.0530 | <i>L. braziliensis</i> | 43  | 225  | 267  |

|                |                        |     |      |      |
|----------------|------------------------|-----|------|------|
| LbrM16_V2.0530 | <i>L. braziliensis</i> | 91  | 308  | 398  |
| LbrM16_V2.0530 | <i>L. braziliensis</i> | 356 | 495  | 850  |
| LbrM16_V2.0580 | <i>L. braziliensis</i> | 81  | 155  | 235  |
| LbrM16_V2.0580 | <i>L. braziliensis</i> | 65  | 407  | 471  |
| LbrM16_V2.0610 | <i>L. braziliensis</i> | 215 | 58   | 272  |
| LbrM16_V2.0610 | <i>L. braziliensis</i> | 184 | 427  | 610  |
| LbrM16_V2.0610 | <i>L. braziliensis</i> | 99  | 880  | 978  |
| LbrM16_V2.0610 | <i>L. braziliensis</i> | 52  | 1049 | 1100 |
| LbrM16_V2.0620 | <i>L. braziliensis</i> | 58  | 70   | 127  |
| LbrM16_V2.0620 | <i>L. braziliensis</i> | 54  | 240  | 293  |
| LbrM16_V2.0620 | <i>L. braziliensis</i> | 80  | 417  | 496  |
| LbrM16_V2.0630 | <i>L. braziliensis</i> | 113 | 116  | 228  |
| LbrM16_V2.0630 | <i>L. braziliensis</i> | 77  | 438  | 514  |
| LbrM16_V2.0630 | <i>L. braziliensis</i> | 77  | 438  | 514  |
| LbrM16_V2.0650 | <i>L. braziliensis</i> | 495 | 71   | 565  |
| LbrM16_V2.0660 | <i>L. braziliensis</i> | 57  | 30   | 86   |
| LbrM16_V2.0660 | <i>L. braziliensis</i> | 137 | 91   | 227  |
| LbrM16_V2.0660 | <i>L. braziliensis</i> | 51  | 405  | 455  |
| LbrM16_V2.0660 | <i>L. braziliensis</i> | 47  | 532  | 578  |
| LbrM16_V2.0670 | <i>L. braziliensis</i> | 89  | 1    | 89   |
| LbrM16_V2.0680 | <i>L. braziliensis</i> | 65  | 487  | 551  |
| LbrM16_V2.0690 | <i>L. braziliensis</i> | 81  | 1    | 81   |
| LbrM16_V2.0690 | <i>L. braziliensis</i> | 654 | 106  | 759  |
| LbrM16_V2.0690 | <i>L. braziliensis</i> | 71  | 788  | 858  |
| LbrM16_V2.0700 | <i>L. braziliensis</i> | 133 | 1    | 133  |
| LbrM16_V2.0700 | <i>L. braziliensis</i> | 348 | 143  | 490  |
| LbrM16_V2.0700 | <i>L. braziliensis</i> | 94  | 526  | 619  |
| LbrM16_V2.0700 | <i>L. braziliensis</i> | 274 | 640  | 913  |
| LbrM16_V2.0700 | <i>L. braziliensis</i> | 98  | 929  | 1026 |
| LbrM16_V2.0710 | <i>L. braziliensis</i> | 58  | 55   | 112  |
| LbrM16_V2.0710 | <i>L. braziliensis</i> | 45  | 170  | 214  |
| LbrM16_V2.0710 | <i>L. braziliensis</i> | 41  | 276  | 316  |
| LbrM16_V2.0710 | <i>L. braziliensis</i> | 45  | 468  | 512  |
| LbrM16_V2.0720 | <i>L. braziliensis</i> | 53  | 78   | 130  |
| LbrM16_V2.0720 | <i>L. braziliensis</i> | 100 | 413  | 512  |
| LbrM16_V2.0720 | <i>L. braziliensis</i> | 44  | 613  | 656  |
| LbrM16_V2.0720 | <i>L. braziliensis</i> | 130 | 747  | 876  |
| LbrM16_V2.0720 | <i>L. braziliensis</i> | 44  | 916  | 959  |
| LbrM16_V2.0720 | <i>L. braziliensis</i> | 56  | 1039 | 1094 |
| LbrM16_V2.0720 | <i>L. braziliensis</i> | 112 | 1115 | 1226 |
| LbrM16_V2.0720 | <i>L. braziliensis</i> | 89  | 1371 | 1459 |
| LbrM16_V2.0720 | <i>L. braziliensis</i> | 40  | 1592 | 1631 |
| LbrM16_V2.0730 | <i>L. braziliensis</i> | 68  | 51   | 118  |
| LbrM16_V2.0730 | <i>L. braziliensis</i> | 108 | 136  | 243  |
| LbrM16_V2.0730 | <i>L. braziliensis</i> | 60  | 284  | 343  |
| LbrM16_V2.0730 | <i>L. braziliensis</i> | 52  | 346  | 397  |
| LbrM16_V2.0730 | <i>L. braziliensis</i> | 146 | 466  | 611  |

|                |                        |     |      |      |
|----------------|------------------------|-----|------|------|
| LbrM16_V2.0730 | <i>L. braziliensis</i> | 74  | 675  | 748  |
| LbrM16_V2.0740 | <i>L. braziliensis</i> | 64  | 149  | 212  |
| LbrM16_V2.0740 | <i>L. braziliensis</i> | 48  | 361  | 408  |
| LbrM16_V2.0740 | <i>L. braziliensis</i> | 70  | 464  | 533  |
| LbrM16_V2.0740 | <i>L. braziliensis</i> | 69  | 539  | 607  |
| LbrM16_V2.0760 | <i>L. braziliensis</i> | 313 | 53   | 365  |
| LbrM16_V2.0760 | <i>L. braziliensis</i> | 47  | 510  | 556  |
| LbrM16_V2.0770 | <i>L. braziliensis</i> | 41  | 48   | 88   |
| LbrM16_V2.0770 | <i>L. braziliensis</i> | 72  | 124  | 195  |
| LbrM16_V2.0770 | <i>L. braziliensis</i> | 98  | 473  | 570  |
| LbrM16_V2.0770 | <i>L. braziliensis</i> | 44  | 704  | 747  |
| LbrM16_V2.0770 | <i>L. braziliensis</i> | 56  | 869  | 924  |
| LbrM16_V2.0770 | <i>L. braziliensis</i> | 119 | 1012 | 1130 |
| LbrM16_V2.0770 | <i>L. braziliensis</i> | 58  | 1252 | 1309 |
| LbrM16_V2.0770 | <i>L. braziliensis</i> | 62  | 1405 | 1466 |
| LbrM16_V2.0770 | <i>L. braziliensis</i> | 89  | 1614 | 1702 |
| LbrM16_V2.0770 | <i>L. braziliensis</i> | 70  | 1749 | 1818 |
| LbrM16_V2.0770 | <i>L. braziliensis</i> | 59  | 1893 | 1951 |
| LbrM16_V2.0770 | <i>L. braziliensis</i> | 40  | 1997 | 2036 |
| LbrM16_V2.0770 | <i>L. braziliensis</i> | 68  | 2090 | 2157 |
| LbrM16_V2.0770 | <i>L. braziliensis</i> | 48  | 2363 | 2410 |
| LbrM16_V2.0770 | <i>L. braziliensis</i> | 68  | 2455 | 2522 |
| LbrM16_V2.0770 | <i>L. braziliensis</i> | 52  | 2560 | 2611 |
| LbrM16_V2.0770 | <i>L. braziliensis</i> | 58  | 2688 | 2745 |
| LbrM16_V2.0770 | <i>L. braziliensis</i> | 49  | 2838 | 2886 |
| LbrM16_V2.0770 | <i>L. braziliensis</i> | 92  | 3004 | 3095 |
| LbrM16_V2.0770 | <i>L. braziliensis</i> | 61  | 3376 | 3436 |
| LbrM16_V2.0770 | <i>L. braziliensis</i> | 67  | 3731 | 3797 |
| LbrM16_V2.0770 | <i>L. braziliensis</i> | 48  | 4369 | 4416 |
| LbrM16_V2.0770 | <i>L. braziliensis</i> | 284 | 5218 | 5501 |
| LbrM16_V2.0780 | <i>L. braziliensis</i> | 64  | 1    | 64   |
| LbrM16_V2.0780 | <i>L. braziliensis</i> | 40  | 107  | 146  |
| LbrM16_V2.0780 | <i>L. braziliensis</i> | 70  | 180  | 249  |
| LbrM16_V2.0780 | <i>L. braziliensis</i> | 71  | 271  | 341  |
| LbrM16_V2.0780 | <i>L. braziliensis</i> | 80  | 366  | 445  |
| LbrM16_V2.0780 | <i>L. braziliensis</i> | 82  | 462  | 543  |
| LbrM16_V2.0780 | <i>L. braziliensis</i> | 77  | 564  | 640  |
| LbrM16_V2.0790 | <i>L. braziliensis</i> | 120 | 1    | 120  |
| LbrM16_V2.0790 | <i>L. braziliensis</i> | 63  | 143  | 205  |
| LbrM16_V2.0790 | <i>L. braziliensis</i> | 136 | 245  | 380  |
| LbrM16_V2.0800 | <i>L. braziliensis</i> | 41  | 290  | 330  |
| LbrM16_V2.0810 | <i>L. braziliensis</i> | 139 | 269  | 407  |
| LbrM16_V2.0810 | <i>L. braziliensis</i> | 43  | 593  | 635  |
| LbrM16_V2.0810 | <i>L. braziliensis</i> | 43  | 593  | 635  |
| LbrM16_V2.0820 | <i>L. braziliensis</i> | 68  | 179  | 246  |
| LbrM16_V2.0830 | <i>L. braziliensis</i> | 63  | 132  | 194  |
| LbrM16_V2.0830 | <i>L. braziliensis</i> | 169 | 196  | 364  |

|                |                        |     |      |      |
|----------------|------------------------|-----|------|------|
| LbrM16_V2.0830 | <i>L. braziliensis</i> | 97  | 536  | 632  |
| LbrM16_V2.0840 | <i>L. braziliensis</i> | 162 | 1    | 162  |
| LbrM16_V2.0850 | <i>L. braziliensis</i> | 46  | 318  | 363  |
| LbrM16_V2.0850 | <i>L. braziliensis</i> | 47  | 410  | 456  |
| LbrM16_V2.0850 | <i>L. braziliensis</i> | 47  | 410  | 456  |
| LbrM16_V2.0860 | <i>L. braziliensis</i> | 145 | 329  | 473  |
| LbrM16_V2.0870 | <i>L. braziliensis</i> | 48  | 1    | 48   |
| LbrM16_V2.0870 | <i>L. braziliensis</i> | 109 | 91   | 199  |
| LbrM16_V2.0870 | <i>L. braziliensis</i> | 109 | 91   | 199  |
| LbrM16_V2.0880 | <i>L. braziliensis</i> | 142 | 1    | 142  |
| LbrM16_V2.0890 | <i>L. braziliensis</i> | 84  | 96   | 179  |
| LbrM16_V2.0890 | <i>L. braziliensis</i> | 57  | 293  | 349  |
| LbrM16_V2.0890 | <i>L. braziliensis</i> | 51  | 456  | 506  |
| LbrM16_V2.0890 | <i>L. braziliensis</i> | 132 | 531  | 662  |
| LbrM16_V2.0900 | <i>L. braziliensis</i> | 58  | 58   | 115  |
| LbrM16_V2.0900 | <i>L. braziliensis</i> | 152 | 147  | 298  |
| LbrM16_V2.0910 | <i>L. braziliensis</i> | 99  | 171  | 269  |
| LbrM16_V2.0910 | <i>L. braziliensis</i> | 62  | 1149 | 1210 |
| LbrM16_V2.0910 | <i>L. braziliensis</i> | 62  | 1149 | 1210 |
| LbrM16_V2.0930 | <i>L. braziliensis</i> | 44  | 1    | 44   |
| LbrM16_V2.0940 | <i>L. braziliensis</i> | 66  | 1    | 66   |
| LbrM16_V2.0940 | <i>L. braziliensis</i> | 91  | 133  | 223  |
| LbrM16_V2.0970 | <i>L. braziliensis</i> | 160 | 188  | 347  |
| LbrM16_V2.0980 | <i>L. braziliensis</i> | 86  | 163  | 248  |
| LbrM16_V2.0990 | <i>L. braziliensis</i> | 830 | 1    | 830  |
| LbrM16_V2.1000 | <i>L. braziliensis</i> | 42  | 150  | 191  |
| LbrM16_V2.1000 | <i>L. braziliensis</i> | 48  | 307  | 354  |
| LbrM16_V2.1000 | <i>L. braziliensis</i> | 48  | 307  | 354  |
| LbrM16_V2.1020 | <i>L. braziliensis</i> | 89  | 98   | 186  |
| LbrM16_V2.1040 | <i>L. braziliensis</i> | 124 | 68   | 191  |
| LbrM16_V2.1060 | <i>L. braziliensis</i> | 63  | 1    | 63   |
| LbrM16_V2.1070 | <i>L. braziliensis</i> | 45  | 271  | 315  |
| LbrM16_V2.1080 | <i>L. braziliensis</i> | 53  | 1    | 53   |
| LbrM16_V2.1080 | <i>L. braziliensis</i> | 41  | 248  | 288  |
| LbrM16_V2.1080 | <i>L. braziliensis</i> | 41  | 248  | 288  |
| LbrM16_V2.1100 | <i>L. braziliensis</i> | 57  | 16   | 72   |
| LbrM16_V2.1100 | <i>L. braziliensis</i> | 59  | 155  | 213  |
| LbrM16_V2.1100 | <i>L. braziliensis</i> | 47  | 439  | 485  |
| LbrM16_V2.1110 | <i>L. braziliensis</i> | 369 | 78   | 446  |
| LbrM16_V2.1110 | <i>L. braziliensis</i> | 41  | 454  | 494  |
| LbrM16_V2.1110 | <i>L. braziliensis</i> | 86  | 520  | 605  |
| LbrM16_V2.1120 | <i>L. braziliensis</i> | 59  | 1    | 59   |
| LbrM16_V2.1120 | <i>L. braziliensis</i> | 248 | 93   | 340  |
| LbrM16_V2.1120 | <i>L. braziliensis</i> | 62  | 406  | 467  |
| LbrM16_V2.1120 | <i>L. braziliensis</i> | 287 | 496  | 782  |
| LbrM16_V2.1120 | <i>L. braziliensis</i> | 438 | 816  | 1253 |
| LbrM16_V2.1120 | <i>L. braziliensis</i> | 90  | 1286 | 1375 |



|                |                        |     |      |      |
|----------------|------------------------|-----|------|------|
| LbrM16_V2.1120 | <i>L. braziliensis</i> | 235 | 1393 | 1627 |
| LbrM16_V2.1120 | <i>L. braziliensis</i> | 117 | 1658 | 1774 |
| LbrM16_V2.1120 | <i>L. braziliensis</i> | 532 | 1811 | 2342 |
| LbrM16_V2.1130 | <i>L. braziliensis</i> | 69  | 1    | 69   |
| LbrM16_V2.1130 | <i>L. braziliensis</i> | 154 | 79   | 232  |
| LbrM16_V2.1130 | <i>L. braziliensis</i> | 58  | 282  | 339  |
| LbrM16_V2.1130 | <i>L. braziliensis</i> | 84  | 376  | 459  |
| LbrM16_V2.1130 | <i>L. braziliensis</i> | 134 | 487  | 620  |
| LbrM16_V2.1130 | <i>L. braziliensis</i> | 105 | 648  | 752  |
| LbrM16_V2.1130 | <i>L. braziliensis</i> | 123 | 790  | 912  |
| LbrM16_V2.1140 | <i>L. braziliensis</i> | 226 | 147  | 372  |
| LbrM16_V2.1170 | <i>L. braziliensis</i> | 177 | 214  | 390  |
| LbrM16_V2.1170 | <i>L. braziliensis</i> | 117 | 409  | 525  |
| LbrM16_V2.1190 | <i>L. braziliensis</i> | 91  | 1    | 91   |
| LbrM16_V2.1200 | <i>L. braziliensis</i> | 86  | 126  | 211  |
| LbrM16_V2.1200 | <i>L. braziliensis</i> | 66  | 268  | 333  |
| LbrM16_V2.1200 | <i>L. braziliensis</i> | 40  | 418  | 457  |
| LbrM16_V2.1220 | <i>L. braziliensis</i> | 146 | 143  | 288  |
| LbrM16_V2.1230 | <i>L. braziliensis</i> | 106 | 142  | 247  |
| LbrM16_V2.1230 | <i>L. braziliensis</i> | 53  | 426  | 478  |
| LbrM16_V2.1230 | <i>L. braziliensis</i> | 80  | 534  | 613  |
| LbrM16_V2.1230 | <i>L. braziliensis</i> | 97  | 1038 | 1134 |
| LbrM16_V2.1230 | <i>L. braziliensis</i> | 143 | 1215 | 1357 |
| LbrM16_V2.1240 | <i>L. braziliensis</i> | 107 | 243  | 349  |
| LbrM16_V2.1250 | <i>L. braziliensis</i> | 42  | 1    | 42   |
| LbrM16_V2.1250 | <i>L. braziliensis</i> | 135 | 91   | 225  |
| LbrM16_V2.1250 | <i>L. braziliensis</i> | 142 | 331  | 472  |
| LbrM16_V2.1250 | <i>L. braziliensis</i> | 43  | 528  | 570  |
| LbrM16_V2.1250 | <i>L. braziliensis</i> | 62  | 853  | 914  |
| LbrM16_V2.1250 | <i>L. braziliensis</i> | 81  | 976  | 1056 |
| LbrM16_V2.1250 | <i>L. braziliensis</i> | 43  | 1078 | 1120 |
| LbrM16_V2.1250 | <i>L. braziliensis</i> | 75  | 1201 | 1275 |
| LbrM16_V2.1260 | <i>L. braziliensis</i> | 174 | 1    | 174  |
| LbrM16_V2.1260 | <i>L. braziliensis</i> | 386 | 264  | 649  |
| LbrM16_V2.1260 | <i>L. braziliensis</i> | 239 | 758  | 996  |
| LbrM16_V2.1260 | <i>L. braziliensis</i> | 87  | 1173 | 1259 |
| LbrM16_V2.1260 | <i>L. braziliensis</i> | 105 | 1262 | 1366 |
| LbrM16_V2.1260 | <i>L. braziliensis</i> | 49  | 1486 | 1534 |
| LbrM16_V2.1260 | <i>L. braziliensis</i> | 44  | 1617 | 1660 |
| LbrM16_V2.1260 | <i>L. braziliensis</i> | 51  | 1876 | 1926 |
| LbrM16_V2.1270 | <i>L. braziliensis</i> | 61  | 620  | 680  |
| LbrM16_V2.1270 | <i>L. braziliensis</i> | 167 | 953  | 1119 |
| LbrM16_V2.1280 | <i>L. braziliensis</i> | 51  | 21   | 71   |
| LbrM16_V2.1290 | <i>L. braziliensis</i> | 176 | 63   | 238  |
| LbrM16_V2.1290 | <i>L. braziliensis</i> | 117 | 263  | 379  |
| LbrM16_V2.1290 | <i>L. braziliensis</i> | 274 | 424  | 697  |
| LbrM16_V2.1290 | <i>L. braziliensis</i> | 50  | 805  | 854  |

|                |                        |     |      |      |
|----------------|------------------------|-----|------|------|
| LbrM16_V2.1290 | <i>L. braziliensis</i> | 114 | 910  | 1023 |
| LbrM16_V2.1290 | <i>L. braziliensis</i> | 43  | 1131 | 1173 |
| LbrM16_V2.1290 | <i>L. braziliensis</i> | 167 | 1238 | 1404 |
| LbrM16_V2.1290 | <i>L. braziliensis</i> | 184 | 1412 | 1595 |
| LbrM16_V2.1290 | <i>L. braziliensis</i> | 117 | 2010 | 2126 |
| LbrM16_V2.1310 | <i>L. braziliensis</i> | 242 | 44   | 285  |
| LbrM16_V2.1310 | <i>L. braziliensis</i> | 86  | 318  | 403  |
| LbrM16_V2.1310 | <i>L. braziliensis</i> | 129 | 738  | 866  |
| LbrM16_V2.1310 | <i>L. braziliensis</i> | 94  | 898  | 991  |
| LbrM16_V2.1310 | <i>L. braziliensis</i> | 52  | 1083 | 1134 |
| LbrM16_V2.1310 | <i>L. braziliensis</i> | 103 | 1386 | 1488 |
| LbrM16_V2.1310 | <i>L. braziliensis</i> | 72  | 1538 | 1609 |
| LbrM16_V2.1310 | <i>L. braziliensis</i> | 65  | 1685 | 1749 |
| LbrM16_V2.1320 | <i>L. braziliensis</i> | 239 | 1    | 239  |
| LbrM16_V2.1320 | <i>L. braziliensis</i> | 196 | 275  | 470  |
| LbrM16_V2.1320 | <i>L. braziliensis</i> | 166 | 553  | 718  |
| LbrM16_V2.1320 | <i>L. braziliensis</i> | 61  | 826  | 886  |
| LbrM16_V2.1320 | <i>L. braziliensis</i> | 610 | 1020 | 1629 |
| LbrM16_V2.1320 | <i>L. braziliensis</i> | 69  | 1738 | 1806 |
| LbrM16_V2.1320 | <i>L. braziliensis</i> | 50  | 1852 | 1901 |
| LbrM16_V2.1320 | <i>L. braziliensis</i> | 82  | 1914 | 1995 |
| LbrM16_V2.1320 | <i>L. braziliensis</i> | 170 | 2080 | 2249 |
| LbrM16_V2.1340 | <i>L. braziliensis</i> | 54  | 1    | 54   |
| LbrM16_V2.1340 | <i>L. braziliensis</i> | 47  | 273  | 319  |
| LbrM16_V2.1340 | <i>L. braziliensis</i> | 47  | 273  | 319  |
| LbrM16_V2.1350 | <i>L. braziliensis</i> | 89  | 51   | 139  |
| LbrM16_V2.1350 | <i>L. braziliensis</i> | 85  | 163  | 247  |
| LbrM16_V2.1350 | <i>L. braziliensis</i> | 92  | 287  | 378  |
| LbrM16_V2.1350 | <i>L. braziliensis</i> | 147 | 487  | 633  |
| LbrM16_V2.1350 | <i>L. braziliensis</i> | 61  | 897  | 957  |
| LbrM16_V2.1380 | <i>L. braziliensis</i> | 567 | 1    | 567  |
| LbrM16_V2.1380 | <i>L. braziliensis</i> | 70  | 1176 | 1245 |
| LbrM16_V2.1390 | <i>L. braziliensis</i> | 48  | 30   | 77   |
| LbrM16_V2.1390 | <i>L. braziliensis</i> | 188 | 421  | 608  |
| LbrM16_V2.1390 | <i>L. braziliensis</i> | 57  | 1266 | 1322 |
| LbrM16_V2.1390 | <i>L. braziliensis</i> | 54  | 1453 | 1506 |
| LbrM16_V2.1390 | <i>L. braziliensis</i> | 75  | 1696 | 1770 |
| LbrM16_V2.1390 | <i>L. braziliensis</i> | 71  | 1813 | 1883 |
| LbrM16_V2.1390 | <i>L. braziliensis</i> | 41  | 1933 | 1973 |
| LbrM16_V2.1390 | <i>L. braziliensis</i> | 61  | 2196 | 2256 |
| LbrM16_V2.1390 | <i>L. braziliensis</i> | 41  | 2503 | 2543 |
| LbrM16_V2.1390 | <i>L. braziliensis</i> | 85  | 2653 | 2737 |
| LbrM16_V2.1390 | <i>L. braziliensis</i> | 55  | 3006 | 3060 |
| LbrM16_V2.1390 | <i>L. braziliensis</i> | 51  | 3113 | 3163 |
| LbrM16_V2.1390 | <i>L. braziliensis</i> | 88  | 3195 | 3282 |
| LbrM16_V2.1390 | <i>L. braziliensis</i> | 61  | 3289 | 3349 |
| LbrM16_V2.1400 | <i>L. braziliensis</i> | 71  | 191  | 261  |

|                |                        |     |      |      |
|----------------|------------------------|-----|------|------|
| LbrM16_V2.1400 | <i>L. braziliensis</i> | 46  | 931  | 976  |
| LbrM16_V2.1400 | <i>L. braziliensis</i> | 56  | 1107 | 1162 |
| LbrM16_V2.1400 | <i>L. braziliensis</i> | 178 | 1376 | 1553 |
| LbrM16_V2.1440 | <i>L. braziliensis</i> | 136 | 1    | 136  |
| LbrM16_V2.1440 | <i>L. braziliensis</i> | 212 | 147  | 358  |
| LbrM16_V2.1440 | <i>L. braziliensis</i> | 224 | 498  | 721  |
| LbrM16_V2.1440 | <i>L. braziliensis</i> | 167 | 759  | 925  |
| LbrM16_V2.1450 | <i>L. braziliensis</i> | 44  | 184  | 227  |
| LbrM16_V2.1470 | <i>L. braziliensis</i> | 75  | 75   | 149  |
| LbrM16_V2.1480 | <i>L. braziliensis</i> | 46  | 130  | 175  |
| LbrM16_V2.1480 | <i>L. braziliensis</i> | 120 | 259  | 378  |
| LbrM16_V2.1480 | <i>L. braziliensis</i> | 45  | 485  | 529  |
| LbrM16_V2.1480 | <i>L. braziliensis</i> | 57  | 543  | 599  |
| LbrM16_V2.1490 | <i>L. braziliensis</i> | 124 | 1    | 124  |
| LbrM16_V2.1490 | <i>L. braziliensis</i> | 45  | 231  | 275  |
| LbrM16_V2.1490 | <i>L. braziliensis</i> | 57  | 289  | 345  |
| LbrM16_V2.1500 | <i>L. braziliensis</i> | 49  | 465  | 513  |
| LbrM16_V2.1500 | <i>L. braziliensis</i> | 94  | 684  | 777  |
| LbrM16_V2.1500 | <i>L. braziliensis</i> | 46  | 963  | 1008 |
| LbrM16_V2.1500 | <i>L. braziliensis</i> | 120 | 1123 | 1242 |
| LbrM16_V2.1510 | <i>L. braziliensis</i> | 566 | 1    | 566  |
| LbrM16_V2.1510 | <i>L. braziliensis</i> | 57  | 664  | 720  |
| LbrM16_V2.1530 | <i>L. braziliensis</i> | 133 | 1    | 133  |
| LbrM16_V2.1530 | <i>L. braziliensis</i> | 307 | 585  | 891  |
| LbrM16_V2.1530 | <i>L. braziliensis</i> | 49  | 989  | 1037 |
| LbrM16_V2.1540 | <i>L. braziliensis</i> | 40  | 1    | 40   |
| LbrM16_V2.1540 | <i>L. braziliensis</i> | 60  | 52   | 111  |
| LbrM16_V2.1540 | <i>L. braziliensis</i> | 106 | 220  | 325  |
| LbrM16_V2.1550 | <i>L. braziliensis</i> | 97  | 268  | 364  |
| LbrM16_V2.1560 | <i>L. braziliensis</i> | 77  | 344  | 420  |
| LbrM16_V2.1580 | <i>L. braziliensis</i> | 61  | 26   | 86   |
| LbrM16_V2.1580 | <i>L. braziliensis</i> | 80  | 242  | 321  |
| LbrM16_V2.1580 | <i>L. braziliensis</i> | 145 | 692  | 836  |
| LbrM16_V2.1580 | <i>L. braziliensis</i> | 157 | 987  | 1143 |
| LbrM16_V2.1600 | <i>L. braziliensis</i> | 227 | 1    | 227  |
| LbrM16_V2.1610 | <i>L. braziliensis</i> | 339 | 559  | 897  |
| LbrM16_V2.1610 | <i>L. braziliensis</i> | 58  | 947  | 1004 |
| LbrM16_V2.1620 | <i>L. braziliensis</i> | 59  | 284  | 342  |
| LbrM16_V2.1630 | <i>L. braziliensis</i> | 134 | 141  | 274  |
| LbrM16_V2.1640 | <i>L. braziliensis</i> | 112 | 332  | 443  |
| LbrM16_V2.1640 | <i>L. braziliensis</i> | 54  | 490  | 543  |
| LbrM16_V2.1640 | <i>L. braziliensis</i> | 80  | 786  | 865  |
| LbrM16_V2.1650 | <i>L. braziliensis</i> | 99  | 1    | 99   |
| LbrM16_V2.1650 | <i>L. braziliensis</i> | 73  | 209  | 281  |
| LbrM16_V2.1650 | <i>L. braziliensis</i> | 73  | 209  | 281  |
| LbrM16_V2.1660 | <i>L. braziliensis</i> | 114 | 189  | 302  |
| LbrM16_V2.1680 | <i>L. braziliensis</i> | 46  | 314  | 359  |

|                |                        |     |      |      |
|----------------|------------------------|-----|------|------|
| LbrM16_V2.1690 | <i>L. braziliensis</i> | 51  | 71   | 121  |
| LbrM16_V2.1690 | <i>L. braziliensis</i> | 88  | 152  | 239  |
| LbrM16_V2.1690 | <i>L. braziliensis</i> | 88  | 152  | 239  |
| LbrM16_V2.1720 | <i>L. braziliensis</i> | 41  | 751  | 791  |
| LbrM16_V2.1720 | <i>L. braziliensis</i> | 75  | 1555 | 1629 |
| LbrM16_V2.1720 | <i>L. braziliensis</i> | 63  | 3834 | 3896 |
| LbrM16_V2.1730 | <i>L. braziliensis</i> | 47  | 15   | 61   |
| LbrM16_V2.1730 | <i>L. braziliensis</i> | 66  | 95   | 160  |
| LbrM16_V2.1730 | <i>L. braziliensis</i> | 53  | 204  | 256  |
| LbrM16_V2.1730 | <i>L. braziliensis</i> | 71  | 284  | 354  |
| LbrM16_V2.1730 | <i>L. braziliensis</i> | 77  | 382  | 458  |
| LbrM16_V2.1730 | <i>L. braziliensis</i> | 71  | 480  | 550  |
| LbrM16_V2.1730 | <i>L. braziliensis</i> | 89  | 574  | 662  |
| LbrM16_V2.1730 | <i>L. braziliensis</i> | 73  | 675  | 747  |
| LbrM16_V2.1730 | <i>L. braziliensis</i> | 86  | 769  | 854  |
| LbrM16_V2.1740 | <i>L. braziliensis</i> | 60  | 1    | 60   |
| LbrM16_V2.1740 | <i>L. braziliensis</i> | 80  | 85   | 164  |
| LbrM16_V2.1740 | <i>L. braziliensis</i> | 81  | 182  | 262  |
| LbrM16_V2.1740 | <i>L. braziliensis</i> | 90  | 279  | 368  |
| LbrM16_V2.1740 | <i>L. braziliensis</i> | 77  | 381  | 457  |
| LbrM16_V2.1740 | <i>L. braziliensis</i> | 191 | 787  | 977  |
| LbrM16_V2.1740 | <i>L. braziliensis</i> | 66  | 1000 | 1065 |
| LbrM16_V2.1740 | <i>L. braziliensis</i> | 141 | 1097 | 1237 |
| LbrM16_V2.1740 | <i>L. braziliensis</i> | 129 | 1485 | 1613 |
| LbrM17_V2.0010 | <i>L. braziliensis</i> | 65  | 1244 | 1308 |
| LbrM17_V2.0020 | <i>L. braziliensis</i> | 48  | 79   | 126  |
| LbrM17_V2.0020 | <i>L. braziliensis</i> | 113 | 514  | 626  |
| LbrM17_V2.0020 | <i>L. braziliensis</i> | 89  | 686  | 774  |
| LbrM17_V2.0040 | <i>L. braziliensis</i> | 64  | 107  | 170  |
| LbrM17_V2.0050 | <i>L. braziliensis</i> | 49  | 214  | 262  |
| LbrM17_V2.0060 | <i>L. braziliensis</i> | 63  | 146  | 208  |
| LbrM17_V2.0070 | <i>L. braziliensis</i> | 69  | 431  | 499  |
| LbrM17_V2.0100 | <i>L. braziliensis</i> | 91  | 939  | 1029 |
| LbrM17_V2.0130 | <i>L. braziliensis</i> | 155 | 1251 | 1405 |
| LbrM17_V2.0140 | <i>L. braziliensis</i> | 50  | 24   | 73   |
| LbrM17_V2.0140 | <i>L. braziliensis</i> | 68  | 398  | 465  |
| LbrM17_V2.0140 | <i>L. braziliensis</i> | 115 | 507  | 621  |
| LbrM17_V2.0150 | <i>L. braziliensis</i> | 114 | 1    | 114  |
| LbrM17_V2.0150 | <i>L. braziliensis</i> | 294 | 139  | 432  |
| LbrM17_V2.0170 | <i>L. braziliensis</i> | 186 | 661  | 846  |
| LbrM17_V2.0190 | <i>L. braziliensis</i> | 41  | 446  | 486  |
| LbrM17_V2.0190 | <i>L. braziliensis</i> | 60  | 518  | 577  |
| LbrM17_V2.0190 | <i>L. braziliensis</i> | 46  | 610  | 655  |
| LbrM17_V2.0190 | <i>L. braziliensis</i> | 50  | 771  | 820  |
| LbrM17_V2.0200 | <i>L. braziliensis</i> | 106 | 45   | 150  |
| LbrM17_V2.0200 | <i>L. braziliensis</i> | 128 | 217  | 344  |
| LbrM17_V2.0200 | <i>L. braziliensis</i> | 140 | 378  | 517  |

|                |                        |     |      |      |
|----------------|------------------------|-----|------|------|
| LbrM17_V2.0200 | <i>L. braziliensis</i> | 110 | 527  | 636  |
| LbrM17_V2.0210 | <i>L. braziliensis</i> | 248 | 1    | 248  |
| LbrM17_V2.0210 | <i>L. braziliensis</i> | 55  | 350  | 404  |
| LbrM17_V2.0220 | <i>L. braziliensis</i> | 72  | 1    | 72   |
| LbrM17_V2.0220 | <i>L. braziliensis</i> | 152 | 75   | 226  |
| LbrM17_V2.0220 | <i>L. braziliensis</i> | 213 | 275  | 487  |
| LbrM17_V2.0220 | <i>L. braziliensis</i> | 62  | 965  | 1026 |
| LbrM17_V2.0220 | <i>L. braziliensis</i> | 148 | 1102 | 1249 |
| LbrM17_V2.0240 | <i>L. braziliensis</i> | 177 | 49   | 225  |
| LbrM17_V2.0240 | <i>L. braziliensis</i> | 148 | 261  | 408  |
| LbrM17_V2.0240 | <i>L. braziliensis</i> | 318 | 438  | 755  |
| LbrM17_V2.0240 | <i>L. braziliensis</i> | 61  | 758  | 818  |
| LbrM17_V2.0250 | <i>L. braziliensis</i> | 54  | 221  | 274  |
| LbrM17_V2.0260 | <i>L. braziliensis</i> | 81  | 1    | 81   |
| LbrM17_V2.0270 | <i>L. braziliensis</i> | 216 | 82   | 297  |
| LbrM17_V2.0270 | <i>L. braziliensis</i> | 45  | 403  | 447  |
| LbrM17_V2.0270 | <i>L. braziliensis</i> | 47  | 582  | 628  |
| LbrM17_V2.0280 | <i>L. braziliensis</i> | 40  | 156  | 195  |
| LbrM17_V2.0290 | <i>L. braziliensis</i> | 53  | 1    | 53   |
| LbrM17_V2.0290 | <i>L. braziliensis</i> | 84  | 57   | 140  |
| LbrM17_V2.0290 | <i>L. braziliensis</i> | 73  | 209  | 281  |
| LbrM17_V2.0290 | <i>L. braziliensis</i> | 350 | 381  | 730  |
| LbrM17_V2.0290 | <i>L. braziliensis</i> | 44  | 733  | 776  |
| LbrM17_V2.0290 | <i>L. braziliensis</i> | 391 | 783  | 1173 |
| LbrM17_V2.0290 | <i>L. braziliensis</i> | 158 | 1185 | 1342 |
| LbrM17_V2.0300 | <i>L. braziliensis</i> | 72  | 149  | 220  |
| LbrM17_V2.0300 | <i>L. braziliensis</i> | 68  | 231  | 298  |
| LbrM17_V2.0300 | <i>L. braziliensis</i> | 68  | 231  | 298  |
| LbrM17_V2.0310 | <i>L. braziliensis</i> | 61  | 151  | 211  |
| LbrM17_V2.0310 | <i>L. braziliensis</i> | 48  | 320  | 367  |
| LbrM17_V2.0310 | <i>L. braziliensis</i> | 51  | 760  | 810  |
| LbrM17_V2.0310 | <i>L. braziliensis</i> | 50  | 848  | 897  |
| LbrM17_V2.0310 | <i>L. braziliensis</i> | 42  | 1268 | 1309 |
| LbrM17_V2.0310 | <i>L. braziliensis</i> | 41  | 1644 | 1684 |
| LbrM17_V2.0330 | <i>L. braziliensis</i> | 229 | 1    | 229  |
| LbrM17_V2.0350 | <i>L. braziliensis</i> | 91  | 1    | 91   |
| LbrM17_V2.0350 | <i>L. braziliensis</i> | 61  | 181  | 241  |
| LbrM17_V2.0350 | <i>L. braziliensis</i> | 267 | 374  | 640  |
| LbrM17_V2.0360 | <i>L. braziliensis</i> | 59  | 1    | 59   |
| LbrM17_V2.0360 | <i>L. braziliensis</i> | 99  | 107  | 205  |
| LbrM17_V2.0360 | <i>L. braziliensis</i> | 89  | 232  | 320  |
| LbrM17_V2.0370 | <i>L. braziliensis</i> | 73  | 1    | 73   |
| LbrM17_V2.0370 | <i>L. braziliensis</i> | 66  | 82   | 147  |
| LbrM17_V2.0370 | <i>L. braziliensis</i> | 73  | 260  | 332  |
| LbrM17_V2.0370 | <i>L. braziliensis</i> | 64  | 594  | 657  |
| LbrM17_V2.0370 | <i>L. braziliensis</i> | 113 | 723  | 835  |
| LbrM17_V2.0370 | <i>L. braziliensis</i> | 52  | 1089 | 1140 |

|                |                        |     |      |      |
|----------------|------------------------|-----|------|------|
| LbrM17_V2.0380 | <i>L. braziliensis</i> | 216 | 39   | 254  |
| LbrM17_V2.0380 | <i>L. braziliensis</i> | 86  | 297  | 382  |
| LbrM17_V2.0380 | <i>L. braziliensis</i> | 90  | 482  | 571  |
| LbrM17_V2.0390 | <i>L. braziliensis</i> | 95  | 56   | 150  |
| LbrM17_V2.0390 | <i>L. braziliensis</i> | 97  | 490  | 586  |
| LbrM17_V2.0390 | <i>L. braziliensis</i> | 297 | 701  | 997  |
| LbrM17_V2.0400 | <i>L. braziliensis</i> | 50  | 224  | 273  |
| LbrM17_V2.0400 | <i>L. braziliensis</i> | 142 | 347  | 488  |
| LbrM17_V2.0400 | <i>L. braziliensis</i> | 142 | 347  | 488  |
| LbrM17_V2.0410 | <i>L. braziliensis</i> | 365 | 1    | 365  |
| LbrM17_V2.0410 | <i>L. braziliensis</i> | 136 | 398  | 533  |
| LbrM17_V2.0410 | <i>L. braziliensis</i> | 409 | 539  | 947  |
| LbrM17_V2.0410 | <i>L. braziliensis</i> | 143 | 999  | 1141 |
| LbrM17_V2.0410 | <i>L. braziliensis</i> | 48  | 1199 | 1246 |
| LbrM17_V2.0420 | <i>L. braziliensis</i> | 77  | 17   | 93   |
| LbrM17_V2.0420 | <i>L. braziliensis</i> | 71  | 124  | 194  |
| LbrM17_V2.0420 | <i>L. braziliensis</i> | 331 | 326  | 656  |
| LbrM17_V2.0420 | <i>L. braziliensis</i> | 203 | 669  | 871  |
| LbrM17_V2.0420 | <i>L. braziliensis</i> | 554 | 876  | 1429 |
| LbrM17_V2.0420 | <i>L. braziliensis</i> | 70  | 1578 | 1647 |
| LbrM17_V2.0430 | <i>L. braziliensis</i> | 171 | 91   | 261  |
| LbrM17_V2.0430 | <i>L. braziliensis</i> | 68  | 352  | 419  |
| LbrM17_V2.0430 | <i>L. braziliensis</i> | 62  | 479  | 540  |
| LbrM17_V2.0430 | <i>L. braziliensis</i> | 67  | 595  | 661  |
| LbrM17_V2.0430 | <i>L. braziliensis</i> | 124 | 779  | 902  |
| LbrM17_V2.0430 | <i>L. braziliensis</i> | 43  | 1153 | 1195 |
| LbrM17_V2.0430 | <i>L. braziliensis</i> | 61  | 1313 | 1373 |
| LbrM17_V2.0440 | <i>L. braziliensis</i> | 120 | 18   | 137  |
| LbrM17_V2.0450 | <i>L. braziliensis</i> | 41  | 32   | 72   |
| LbrM17_V2.0450 | <i>L. braziliensis</i> | 61  | 90   | 150  |
| LbrM17_V2.0450 | <i>L. braziliensis</i> | 42  | 282  | 323  |
| LbrM17_V2.0450 | <i>L. braziliensis</i> | 145 | 433  | 577  |
| LbrM17_V2.0450 | <i>L. braziliensis</i> | 87  | 614  | 700  |
| LbrM17_V2.0450 | <i>L. braziliensis</i> | 82  | 976  | 1057 |
| LbrM17_V2.0450 | <i>L. braziliensis</i> | 95  | 1359 | 1453 |
| LbrM17_V2.0450 | <i>L. braziliensis</i> | 64  | 1644 | 1707 |
| LbrM17_V2.0450 | <i>L. braziliensis</i> | 64  | 2117 | 2180 |
| LbrM17_V2.0450 | <i>L. braziliensis</i> | 62  | 2298 | 2359 |
| LbrM17_V2.0450 | <i>L. braziliensis</i> | 65  | 2573 | 2637 |
| LbrM17_V2.0450 | <i>L. braziliensis</i> | 49  | 2674 | 2722 |
| LbrM17_V2.0450 | <i>L. braziliensis</i> | 76  | 2989 | 3064 |
| LbrM17_V2.0450 | <i>L. braziliensis</i> | 63  | 3199 | 3261 |
| LbrM17_V2.0460 | <i>L. braziliensis</i> | 40  | 48   | 87   |
| LbrM17_V2.0460 | <i>L. braziliensis</i> | 99  | 118  | 216  |
| LbrM17_V2.0460 | <i>L. braziliensis</i> | 99  | 118  | 216  |
| LbrM17_V2.0470 | <i>L. braziliensis</i> | 244 | 1    | 244  |
| LbrM17_V2.0470 | <i>L. braziliensis</i> | 89  | 274  | 362  |

|                |                        |     |      |      |
|----------------|------------------------|-----|------|------|
| LbrM17_V2.0470 | <i>L. braziliensis</i> | 178 | 367  | 544  |
| LbrM17_V2.0470 | <i>L. braziliensis</i> | 73  | 613  | 685  |
| LbrM17_V2.0470 | <i>L. braziliensis</i> | 112 | 735  | 846  |
| LbrM17_V2.0480 | <i>L. braziliensis</i> | 168 | 1    | 168  |
| LbrM17_V2.0480 | <i>L. braziliensis</i> | 71  | 215  | 285  |
| LbrM17_V2.0480 | <i>L. braziliensis</i> | 113 | 298  | 410  |
| LbrM17_V2.0490 | <i>L. braziliensis</i> | 130 | 1    | 130  |
| LbrM17_V2.0490 | <i>L. braziliensis</i> | 260 | 138  | 397  |
| LbrM17_V2.0490 | <i>L. braziliensis</i> | 164 | 433  | 596  |
| LbrM17_V2.0490 | <i>L. braziliensis</i> | 75  | 603  | 677  |
| LbrM17_V2.0490 | <i>L. braziliensis</i> | 85  | 716  | 800  |
| LbrM17_V2.0490 | <i>L. braziliensis</i> | 84  | 847  | 930  |
| LbrM17_V2.0500 | <i>L. braziliensis</i> | 57  | 50   | 106  |
| LbrM17_V2.0500 | <i>L. braziliensis</i> | 208 | 110  | 317  |
| LbrM17_V2.0500 | <i>L. braziliensis</i> | 408 | 334  | 741  |
| LbrM17_V2.0500 | <i>L. braziliensis</i> | 49  | 760  | 808  |
| LbrM17_V2.0500 | <i>L. braziliensis</i> | 60  | 816  | 875  |
| LbrM17_V2.0500 | <i>L. braziliensis</i> | 139 | 885  | 1023 |
| LbrM17_V2.0510 | <i>L. braziliensis</i> | 235 | 1    | 235  |
| LbrM17_V2.0510 | <i>L. braziliensis</i> | 83  | 253  | 335  |
| LbrM17_V2.0510 | <i>L. braziliensis</i> | 210 | 365  | 574  |
| LbrM17_V2.0510 | <i>L. braziliensis</i> | 255 | 654  | 908  |
| LbrM17_V2.0520 | <i>L. braziliensis</i> | 46  | 36   | 81   |
| LbrM17_V2.0520 | <i>L. braziliensis</i> | 418 | 108  | 525  |
| LbrM17_V2.0520 | <i>L. braziliensis</i> | 253 | 554  | 806  |
| LbrM17_V2.0520 | <i>L. braziliensis</i> | 54  | 846  | 899  |
| LbrM17_V2.0530 | <i>L. braziliensis</i> | 160 | 1    | 160  |
| LbrM17_V2.0530 | <i>L. braziliensis</i> | 162 | 177  | 338  |
| LbrM17_V2.0530 | <i>L. braziliensis</i> | 62  | 477  | 538  |
| LbrM17_V2.0530 | <i>L. braziliensis</i> | 41  | 977  | 1017 |
| LbrM17_V2.0530 | <i>L. braziliensis</i> | 274 | 1032 | 1305 |
| LbrM17_V2.0540 | <i>L. braziliensis</i> | 172 | 55   | 226  |
| LbrM17_V2.0560 | <i>L. braziliensis</i> | 219 | 10   | 228  |
| LbrM17_V2.0560 | <i>L. braziliensis</i> | 167 | 247  | 413  |
| LbrM17_V2.0560 | <i>L. braziliensis</i> | 405 | 426  | 830  |
| LbrM17_V2.0560 | <i>L. braziliensis</i> | 55  | 852  | 906  |
| LbrM17_V2.0560 | <i>L. braziliensis</i> | 120 | 1015 | 1134 |
| LbrM17_V2.0570 | <i>L. braziliensis</i> | 69  | 174  | 242  |
| LbrM17_V2.0580 | <i>L. braziliensis</i> | 67  | 1    | 67   |
| LbrM17_V2.0580 | <i>L. braziliensis</i> | 72  | 392  | 463  |
| LbrM17_V2.0580 | <i>L. braziliensis</i> | 90  | 571  | 660  |
| LbrM17_V2.0580 | <i>L. braziliensis</i> | 182 | 706  | 887  |
| LbrM17_V2.0580 | <i>L. braziliensis</i> | 43  | 893  | 935  |
| LbrM17_V2.0580 | <i>L. braziliensis</i> | 59  | 1081 | 1139 |
| LbrM17_V2.0580 | <i>L. braziliensis</i> | 144 | 1160 | 1303 |
| LbrM17_V2.0580 | <i>L. braziliensis</i> | 118 | 1355 | 1472 |
| LbrM17_V2.0580 | <i>L. braziliensis</i> | 51  | 1562 | 1612 |

|                |                        |     |      |      |
|----------------|------------------------|-----|------|------|
| LbrM17_V2.0590 | <i>L. braziliensis</i> | 43  | 625  | 667  |
| LbrM17_V2.0600 | <i>L. braziliensis</i> | 191 | 301  | 491  |
| LbrM17_V2.0640 | <i>L. braziliensis</i> | 40  | 305  | 344  |
| LbrM17_V2.0650 | <i>L. braziliensis</i> | 49  | 1    | 49   |
| LbrM17_V2.0650 | <i>L. braziliensis</i> | 64  | 53   | 116  |
| LbrM17_V2.0650 | <i>L. braziliensis</i> | 119 | 173  | 291  |
| LbrM17_V2.0650 | <i>L. braziliensis</i> | 405 | 345  | 749  |
| LbrM17_V2.0660 | <i>L. braziliensis</i> | 41  | 214  | 254  |
| LbrM17_V2.0670 | <i>L. braziliensis</i> | 137 | 134  | 270  |
| LbrM17_V2.0680 | <i>L. braziliensis</i> | 171 | 21   | 191  |
| LbrM17_V2.0690 | <i>L. braziliensis</i> | 44  | 1    | 44   |
| LbrM17_V2.0690 | <i>L. braziliensis</i> | 210 | 273  | 482  |
| LbrM17_V2.0710 | <i>L. braziliensis</i> | 98  | 1    | 98   |
| LbrM17_V2.0710 | <i>L. braziliensis</i> | 132 | 206  | 337  |
| LbrM17_V2.0710 | <i>L. braziliensis</i> | 45  | 575  | 619  |
| LbrM17_V2.0710 | <i>L. braziliensis</i> | 60  | 647  | 706  |
| LbrM17_V2.0710 | <i>L. braziliensis</i> | 76  | 809  | 884  |
| LbrM17_V2.0710 | <i>L. braziliensis</i> | 80  | 1049 | 1128 |
| LbrM17_V2.0720 | <i>L. braziliensis</i> | 44  | 194  | 237  |
| LbrM17_V2.0720 | <i>L. braziliensis</i> | 43  | 278  | 320  |
| LbrM17_V2.0720 | <i>L. braziliensis</i> | 74  | 453  | 526  |
| LbrM17_V2.0720 | <i>L. braziliensis</i> | 40  | 698  | 737  |
| LbrM17_V2.0720 | <i>L. braziliensis</i> | 169 | 768  | 936  |
| LbrM17_V2.0720 | <i>L. braziliensis</i> | 50  | 1047 | 1096 |
| LbrM17_V2.0720 | <i>L. braziliensis</i> | 40  | 1207 | 1246 |
| LbrM17_V2.0730 | <i>L. braziliensis</i> | 202 | 1    | 202  |
| LbrM17_V2.0730 | <i>L. braziliensis</i> | 465 | 224  | 688  |
| LbrM17_V2.0730 | <i>L. braziliensis</i> | 40  | 845  | 884  |
| LbrM17_V2.0730 | <i>L. braziliensis</i> | 176 | 1000 | 1175 |
| LbrM17_V2.0730 | <i>L. braziliensis</i> | 105 | 1191 | 1295 |
| LbrM17_V2.0730 | <i>L. braziliensis</i> | 52  | 1466 | 1517 |
| LbrM17_V2.0730 | <i>L. braziliensis</i> | 43  | 1587 | 1629 |
| LbrM17_V2.0730 | <i>L. braziliensis</i> | 63  | 1646 | 1708 |
| LbrM17_V2.0730 | <i>L. braziliensis</i> | 86  | 1725 | 1810 |
| LbrM17_V2.0740 | <i>L. braziliensis</i> | 73  | 371  | 443  |
| LbrM17_V2.0750 | <i>L. braziliensis</i> | 314 | 211  | 524  |
| LbrM17_V2.0760 | <i>L. braziliensis</i> | 79  | 161  | 239  |
| LbrM17_V2.0760 | <i>L. braziliensis</i> | 79  | 396  | 474  |
| LbrM17_V2.0770 | <i>L. braziliensis</i> | 532 | 112  | 643  |
| LbrM17_V2.0770 | <i>L. braziliensis</i> | 47  | 761  | 807  |
| LbrM17_V2.0780 | <i>L. braziliensis</i> | 58  | 68   | 125  |
| LbrM17_V2.0780 | <i>L. braziliensis</i> | 116 | 165  | 280  |
| LbrM17_V2.0780 | <i>L. braziliensis</i> | 165 | 539  | 703  |
| LbrM17_V2.0780 | <i>L. braziliensis</i> | 63  | 764  | 826  |
| LbrM17_V2.0810 | <i>L. braziliensis</i> | 67  | 198  | 264  |
| LbrM17_V2.0810 | <i>L. braziliensis</i> | 43  | 315  | 357  |
| LbrM17_V2.0810 | <i>L. braziliensis</i> | 73  | 360  | 432  |



|                |                        |     |      |      |
|----------------|------------------------|-----|------|------|
| LbrM17_V2.0810 | <i>L. braziliensis</i> | 106 | 476  | 581  |
| LbrM17_V2.0810 | <i>L. braziliensis</i> | 176 | 586  | 761  |
| LbrM17_V2.0810 | <i>L. braziliensis</i> | 147 | 782  | 928  |
| LbrM17_V2.0820 | <i>L. braziliensis</i> | 174 | 104  | 277  |
| LbrM17_V2.0820 | <i>L. braziliensis</i> | 62  | 296  | 357  |
| LbrM17_V2.0820 | <i>L. braziliensis</i> | 53  | 405  | 457  |
| LbrM17_V2.0820 | <i>L. braziliensis</i> | 171 | 493  | 663  |
| LbrM17_V2.0830 | <i>L. braziliensis</i> | 57  | 1    | 57   |
| LbrM17_V2.0830 | <i>L. braziliensis</i> | 44  | 155  | 198  |
| LbrM17_V2.0830 | <i>L. braziliensis</i> | 91  | 209  | 299  |
| LbrM17_V2.0830 | <i>L. braziliensis</i> | 185 | 324  | 508  |
| LbrM17_V2.0840 | <i>L. braziliensis</i> | 95  | 103  | 197  |
| LbrM17_V2.0840 | <i>L. braziliensis</i> | 43  | 217  | 259  |
| LbrM17_V2.0840 | <i>L. braziliensis</i> | 122 | 356  | 477  |
| LbrM17_V2.0840 | <i>L. braziliensis</i> | 49  | 1009 | 1057 |
| LbrM17_V2.0840 | <i>L. braziliensis</i> | 56  | 1210 | 1265 |
| LbrM17_V2.0840 | <i>L. braziliensis</i> | 69  | 1317 | 1385 |
| LbrM17_V2.0850 | <i>L. braziliensis</i> | 106 | 1    | 106  |
| LbrM17_V2.0850 | <i>L. braziliensis</i> | 218 | 140  | 357  |
| LbrM17_V2.0850 | <i>L. braziliensis</i> | 157 | 387  | 543  |
| LbrM17_V2.0850 | <i>L. braziliensis</i> | 243 | 559  | 801  |
| LbrM17_V2.0860 | <i>L. braziliensis</i> | 54  | 260  | 313  |
| LbrM17_V2.0860 | <i>L. braziliensis</i> | 46  | 459  | 504  |
| LbrM17_V2.0860 | <i>L. braziliensis</i> | 48  | 572  | 619  |
| LbrM17_V2.0870 | <i>L. braziliensis</i> | 130 | 1    | 130  |
| LbrM17_V2.0870 | <i>L. braziliensis</i> | 45  | 415  | 459  |
| LbrM17_V2.0870 | <i>L. braziliensis</i> | 66  | 1073 | 1138 |
| LbrM17_V2.0870 | <i>L. braziliensis</i> | 43  | 1190 | 1232 |
| LbrM17_V2.0870 | <i>L. braziliensis</i> | 48  | 1575 | 1622 |
| LbrM17_V2.0870 | <i>L. braziliensis</i> | 123 | 2020 | 2142 |
| LbrM17_V2.0870 | <i>L. braziliensis</i> | 130 | 2327 | 2456 |
| LbrM17_V2.0870 | <i>L. braziliensis</i> | 48  | 2480 | 2527 |
| LbrM17_V2.0870 | <i>L. braziliensis</i> | 92  | 2530 | 2621 |
| LbrM17_V2.0870 | <i>L. braziliensis</i> | 60  | 2826 | 2885 |
| LbrM17_V2.0870 | <i>L. braziliensis</i> | 54  | 3270 | 3323 |
| LbrM17_V2.0870 | <i>L. braziliensis</i> | 55  | 3462 | 3516 |
| LbrM17_V2.0870 | <i>L. braziliensis</i> | 101 | 3568 | 3668 |
| LbrM17_V2.0870 | <i>L. braziliensis</i> | 59  | 4087 | 4145 |
| LbrM17_V2.0870 | <i>L. braziliensis</i> | 41  | 4874 | 4914 |
| LbrM17_V2.0870 | <i>L. braziliensis</i> | 57  | 4975 | 5031 |
| LbrM17_V2.0870 | <i>L. braziliensis</i> | 76  | 5079 | 5154 |
| LbrM17_V2.0880 | <i>L. braziliensis</i> | 48  | 147  | 194  |
| LbrM17_V2.0890 | <i>L. braziliensis</i> | 87  | 196  | 282  |
| LbrM17_V2.0890 | <i>L. braziliensis</i> | 262 | 326  | 587  |
| LbrM17_V2.0900 | <i>L. braziliensis</i> | 63  | 257  | 319  |
| LbrM17_V2.0900 | <i>L. braziliensis</i> | 40  | 375  | 414  |
| LbrM17_V2.0900 | <i>L. braziliensis</i> | 44  | 575  | 618  |

|                |                        |     |      |      |
|----------------|------------------------|-----|------|------|
| LbrM17_V2.0910 | <i>L. braziliensis</i> | 246 | 69   | 314  |
| LbrM17_V2.0920 | <i>L. braziliensis</i> | 63  | 20   | 82   |
| LbrM17_V2.0920 | <i>L. braziliensis</i> | 53  | 164  | 216  |
| LbrM17_V2.0920 | <i>L. braziliensis</i> | 148 | 457  | 604  |
| LbrM17_V2.0940 | <i>L. braziliensis</i> | 93  | 120  | 212  |
| LbrM17_V2.0940 | <i>L. braziliensis</i> | 48  | 1866 | 1913 |
| LbrM17_V2.0950 | <i>L. braziliensis</i> | 127 | 1    | 127  |
| LbrM17_V2.0950 | <i>L. braziliensis</i> | 69  | 222  | 290  |
| LbrM17_V2.0950 | <i>L. braziliensis</i> | 255 | 375  | 629  |
| LbrM17_V2.0950 | <i>L. braziliensis</i> | 234 | 631  | 864  |
| LbrM17_V2.0950 | <i>L. braziliensis</i> | 274 | 1177 | 1450 |
| LbrM17_V2.0960 | <i>L. braziliensis</i> | 90  | 35   | 124  |
| LbrM17_V2.0960 | <i>L. braziliensis</i> | 48  | 157  | 204  |
| LbrM17_V2.0960 | <i>L. braziliensis</i> | 69  | 243  | 311  |
| LbrM17_V2.0960 | <i>L. braziliensis</i> | 83  | 434  | 516  |
| LbrM17_V2.0960 | <i>L. braziliensis</i> | 181 | 550  | 730  |
| LbrM17_V2.0960 | <i>L. braziliensis</i> | 47  | 851  | 897  |
| LbrM17_V2.0960 | <i>L. braziliensis</i> | 57  | 941  | 997  |
| LbrM17_V2.1000 | <i>L. braziliensis</i> | 105 | 16   | 120  |
| LbrM17_V2.1000 | <i>L. braziliensis</i> | 52  | 247  | 298  |
| LbrM17_V2.1000 | <i>L. braziliensis</i> | 52  | 247  | 298  |
| LbrM17_V2.1010 | <i>L. braziliensis</i> | 59  | 1    | 59   |
| LbrM17_V2.1010 | <i>L. braziliensis</i> | 142 | 70   | 211  |
| LbrM17_V2.1020 | <i>L. braziliensis</i> | 94  | 106  | 199  |
| LbrM17_V2.1020 | <i>L. braziliensis</i> | 53  | 208  | 260  |
| LbrM17_V2.1020 | <i>L. braziliensis</i> | 104 | 294  | 397  |
| LbrM17_V2.1020 | <i>L. braziliensis</i> | 189 | 406  | 594  |
| LbrM17_V2.1030 | <i>L. braziliensis</i> | 46  | 1    | 46   |
| LbrM17_V2.1030 | <i>L. braziliensis</i> | 57  | 447  | 503  |
| LbrM17_V2.1030 | <i>L. braziliensis</i> | 120 | 511  | 630  |
| LbrM17_V2.1040 | <i>L. braziliensis</i> | 147 | 29   | 175  |
| LbrM17_V2.1040 | <i>L. braziliensis</i> | 61  | 235  | 295  |
| LbrM17_V2.1040 | <i>L. braziliensis</i> | 59  | 307  | 365  |
| LbrM17_V2.1040 | <i>L. braziliensis</i> | 41  | 419  | 459  |
| LbrM17_V2.1050 | <i>L. braziliensis</i> | 71  | 1    | 71   |
| LbrM17_V2.1060 | <i>L. braziliensis</i> | 108 | 25   | 132  |
| LbrM17_V2.1080 | <i>L. braziliensis</i> | 64  | 1    | 64   |
| LbrM17_V2.1080 | <i>L. braziliensis</i> | 410 | 78   | 487  |
| LbrM17_V2.1080 | <i>L. braziliensis</i> | 268 | 501  | 768  |
| LbrM17_V2.1080 | <i>L. braziliensis</i> | 205 | 771  | 975  |
| LbrM17_V2.1080 | <i>L. braziliensis</i> | 145 | 1344 | 1488 |
| LbrM17_V2.1090 | <i>L. braziliensis</i> | 76  | 158  | 233  |
| LbrM17_V2.1090 | <i>L. braziliensis</i> | 61  | 632  | 692  |
| LbrM17_V2.1090 | <i>L. braziliensis</i> | 61  | 632  | 692  |
| LbrM17_V2.1100 | <i>L. braziliensis</i> | 133 | 161  | 293  |
| LbrM17_V2.1100 | <i>L. braziliensis</i> | 72  | 344  | 415  |
| LbrM17_V2.1100 | <i>L. braziliensis</i> | 104 | 431  | 534  |

|                |                        |     |      |      |
|----------------|------------------------|-----|------|------|
| LbrM17_V2.1100 | <i>L. braziliensis</i> | 110 | 777  | 886  |
| LbrM17_V2.1100 | <i>L. braziliensis</i> | 171 | 898  | 1068 |
| LbrM17_V2.1100 | <i>L. braziliensis</i> | 40  | 1143 | 1182 |
| LbrM17_V2.1100 | <i>L. braziliensis</i> | 287 | 1223 | 1509 |
| LbrM17_V2.1100 | <i>L. braziliensis</i> | 90  | 1630 | 1719 |
| LbrM17_V2.1100 | <i>L. braziliensis</i> | 115 | 1914 | 2028 |
| LbrM17_V2.1100 | <i>L. braziliensis</i> | 50  | 2127 | 2176 |
| LbrM17_V2.1100 | <i>L. braziliensis</i> | 48  | 2535 | 2582 |
| LbrM17_V2.1100 | <i>L. braziliensis</i> | 82  | 2802 | 2883 |
| LbrM17_V2.1100 | <i>L. braziliensis</i> | 52  | 2935 | 2986 |
| LbrM17_V2.1100 | <i>L. braziliensis</i> | 75  | 3070 | 3144 |
| LbrM17_V2.1100 | <i>L. braziliensis</i> | 113 | 3282 | 3394 |
| LbrM17_V2.1100 | <i>L. braziliensis</i> | 261 | 3401 | 3661 |
| LbrM17_V2.1100 | <i>L. braziliensis</i> | 236 | 3697 | 3932 |
| LbrM17_V2.1100 | <i>L. braziliensis</i> | 44  | 4149 | 4192 |
| LbrM17_V2.1100 | <i>L. braziliensis</i> | 40  | 4221 | 4260 |
| LbrM17_V2.1100 | <i>L. braziliensis</i> | 42  | 4292 | 4333 |
| LbrM17_V2.1100 | <i>L. braziliensis</i> | 72  | 4372 | 4443 |
| LbrM17_V2.1100 | <i>L. braziliensis</i> | 94  | 4823 | 4916 |
| LbrM17_V2.1100 | <i>L. braziliensis</i> | 135 | 5050 | 5184 |
| LbrM17_V2.1100 | <i>L. braziliensis</i> | 193 | 5256 | 5448 |
| LbrM17_V2.1100 | <i>L. braziliensis</i> | 67  | 5470 | 5536 |
| LbrM17_V2.1100 | <i>L. braziliensis</i> | 108 | 5570 | 5677 |
| LbrM17_V2.1100 | <i>L. braziliensis</i> | 87  | 5985 | 6071 |
| LbrM17_V2.1100 | <i>L. braziliensis</i> | 54  | 6073 | 6126 |
| LbrM17_V2.1100 | <i>L. braziliensis</i> | 159 | 6301 | 6459 |
| LbrM17_V2.1100 | <i>L. braziliensis</i> | 61  | 6493 | 6553 |
| LbrM17_V2.1110 | <i>L. braziliensis</i> | 67  | 1    | 67   |
| LbrM17_V2.1110 | <i>L. braziliensis</i> | 133 | 236  | 368  |
| LbrM17_V2.1110 | <i>L. braziliensis</i> | 53  | 501  | 553  |
| LbrM17_V2.1140 | <i>L. braziliensis</i> | 485 | 1    | 485  |
| LbrM17_V2.1150 | <i>L. braziliensis</i> | 86  | 174  | 259  |
| LbrM17_V2.1160 | <i>L. braziliensis</i> | 46  | 276  | 321  |
| LbrM17_V2.1170 | <i>L. braziliensis</i> | 57  | 306  | 362  |
| LbrM17_V2.1170 | <i>L. braziliensis</i> | 74  | 435  | 508  |
| LbrM17_V2.1170 | <i>L. braziliensis</i> | 122 | 527  | 648  |
| LbrM17_V2.1170 | <i>L. braziliensis</i> | 53  | 671  | 723  |
| LbrM17_V2.1180 | <i>L. braziliensis</i> | 42  | 45   | 86   |
| LbrM17_V2.1180 | <i>L. braziliensis</i> | 43  | 259  | 301  |
| LbrM17_V2.1180 | <i>L. braziliensis</i> | 43  | 259  | 301  |
| LbrM17_V2.1190 | <i>L. braziliensis</i> | 55  | 1    | 55   |
| LbrM17_V2.1190 | <i>L. braziliensis</i> | 48  | 161  | 208  |
| LbrM17_V2.1190 | <i>L. braziliensis</i> | 43  | 354  | 396  |
| LbrM17_V2.1190 | <i>L. braziliensis</i> | 81  | 519  | 599  |
| LbrM17_V2.1190 | <i>L. braziliensis</i> | 41  | 674  | 714  |
| LbrM17_V2.1200 | <i>L. braziliensis</i> | 525 | 1    | 525  |
| LbrM17_V2.1200 | <i>L. braziliensis</i> | 44  | 617  | 660  |

|                |                        |     |      |      |
|----------------|------------------------|-----|------|------|
| LbrM17_V2.1200 | <i>L. braziliensis</i> | 75  | 818  | 892  |
| LbrM17_V2.1200 | <i>L. braziliensis</i> | 62  | 933  | 994  |
| LbrM17_V2.1200 | <i>L. braziliensis</i> | 93  | 1092 | 1184 |
| LbrM17_V2.1200 | <i>L. braziliensis</i> | 61  | 1220 | 1280 |
| LbrM17_V2.1210 | <i>L. braziliensis</i> | 43  | 361  | 403  |
| LbrM17_V2.1220 | <i>L. braziliensis</i> | 41  | 228  | 268  |
| LbrM17_V2.1220 | <i>L. braziliensis</i> | 60  | 369  | 428  |
| LbrM17_V2.1220 | <i>L. braziliensis</i> | 237 | 1171 | 1407 |
| LbrM17_V2.1240 | <i>L. braziliensis</i> | 126 | 132  | 257  |
| LbrM17_V2.1240 | <i>L. braziliensis</i> | 97  | 423  | 519  |
| LbrM17_V2.1240 | <i>L. braziliensis</i> | 43  | 862  | 904  |
| LbrM17_V2.1240 | <i>L. braziliensis</i> | 99  | 1075 | 1173 |
| LbrM17_V2.1250 | <i>L. braziliensis</i> | 218 | 96   | 313  |
| LbrM17_V2.1250 | <i>L. braziliensis</i> | 627 | 317  | 943  |
| LbrM17_V2.1250 | <i>L. braziliensis</i> | 251 | 981  | 1231 |
| LbrM17_V2.1250 | <i>L. braziliensis</i> | 58  | 1238 | 1295 |
| LbrM17_V2.1260 | <i>L. braziliensis</i> | 84  | 135  | 218  |
| LbrM17_V2.1260 | <i>L. braziliensis</i> | 56  | 463  | 518  |
| LbrM17_V2.1260 | <i>L. braziliensis</i> | 79  | 806  | 884  |
| LbrM17_V2.1280 | <i>L. braziliensis</i> | 95  | 136  | 230  |
| LbrM17_V2.1280 | <i>L. braziliensis</i> | 151 | 317  | 467  |
| LbrM17_V2.1280 | <i>L. braziliensis</i> | 60  | 550  | 609  |
| LbrM17_V2.1290 | <i>L. braziliensis</i> | 251 | 174  | 424  |
| LbrM17_V2.1290 | <i>L. braziliensis</i> | 64  | 442  | 505  |
| LbrM17_V2.1290 | <i>L. braziliensis</i> | 405 | 518  | 922  |
| LbrM17_V2.1300 | <i>L. braziliensis</i> | 103 | 60   | 162  |
| LbrM17_V2.1300 | <i>L. braziliensis</i> | 66  | 225  | 290  |
| LbrM17_V2.1300 | <i>L. braziliensis</i> | 191 | 329  | 519  |
| LbrM17_V2.1300 | <i>L. braziliensis</i> | 62  | 579  | 640  |
| LbrM17_V2.1310 | <i>L. braziliensis</i> | 286 | 1    | 286  |
| LbrM17_V2.1310 | <i>L. braziliensis</i> | 112 | 294  | 405  |
| LbrM17_V2.1310 | <i>L. braziliensis</i> | 422 | 427  | 848  |
| LbrM17_V2.1320 | <i>L. braziliensis</i> | 114 | 1    | 114  |
| LbrM17_V2.1330 | <i>L. braziliensis</i> | 43  | 1    | 43   |
| LbrM17_V2.1340 | <i>L. braziliensis</i> | 281 | 77   | 357  |
| LbrM17_V2.1340 | <i>L. braziliensis</i> | 167 | 359  | 525  |
| LbrM17_V2.1350 | <i>L. braziliensis</i> | 50  | 1    | 50   |
| LbrM17_V2.1350 | <i>L. braziliensis</i> | 51  | 193  | 243  |
| LbrM17_V2.1350 | <i>L. braziliensis</i> | 57  | 294  | 350  |
| LbrM17_V2.1360 | <i>L. braziliensis</i> | 42  | 187  | 228  |
| LbrM17_V2.1360 | <i>L. braziliensis</i> | 92  | 385  | 476  |
| LbrM17_V2.1360 | <i>L. braziliensis</i> | 175 | 653  | 827  |
| LbrM17_V2.1360 | <i>L. braziliensis</i> | 41  | 1345 | 1385 |
| LbrM17_V2.1370 | <i>L. braziliensis</i> | 51  | 220  | 270  |
| LbrM17_V2.1380 | <i>L. braziliensis</i> | 87  | 44   | 130  |
| LbrM17_V2.1390 | <i>L. braziliensis</i> | 52  | 1    | 52   |
| LbrM17_V2.1400 | <i>L. braziliensis</i> | 67  | 273  | 339  |

|                |                        |     |      |      |
|----------------|------------------------|-----|------|------|
| LbrM17_V2.1400 | <i>L. braziliensis</i> | 43  | 857  | 899  |
| LbrM17_V2.1410 | <i>L. braziliensis</i> | 43  | 440  | 482  |
| LbrM17_V2.1410 | <i>L. braziliensis</i> | 60  | 959  | 1018 |
| LbrM17_V2.1410 | <i>L. braziliensis</i> | 40  | 1041 | 1080 |
| LbrM17_V2.1420 | <i>L. braziliensis</i> | 65  | 260  | 324  |
| LbrM17_V2.1450 | <i>L. braziliensis</i> | 76  | 596  | 671  |
| LbrM17_V2.1480 | <i>L. braziliensis</i> | 51  | 80   | 130  |
| LbrM17_V2.1490 | <i>L. braziliensis</i> | 48  | 235  | 282  |
| LbrM17_V2.1500 | <i>L. braziliensis</i> | 70  | 229  | 298  |
| LbrM17_V2.1500 | <i>L. braziliensis</i> | 373 | 493  | 865  |
| LbrM17_V2.1520 | <i>L. braziliensis</i> | 71  | 116  | 186  |
| LbrM17_V2.1520 | <i>L. braziliensis</i> | 42  | 244  | 285  |
| LbrM17_V2.1520 | <i>L. braziliensis</i> | 42  | 244  | 285  |
| LbrM17_V2.1540 | <i>L. braziliensis</i> | 44  | 1    | 44   |
| LbrM17_V2.1550 | <i>L. braziliensis</i> | 40  | 1    | 40   |
| LbrM17_V2.1550 | <i>L. braziliensis</i> | 59  | 425  | 483  |
| LbrM17_V2.1570 | <i>L. braziliensis</i> | 210 | 48   | 257  |
| LbrM17_V2.1580 | <i>L. braziliensis</i> | 58  | 1    | 58   |
| LbrM17_V2.1600 | <i>L. braziliensis</i> | 70  | 72   | 141  |
| LbrM17_V2.1620 | <i>L. braziliensis</i> | 184 | 59   | 242  |
| LbrM18_V2.0010 | <i>L. braziliensis</i> | 58  | 447  | 504  |
| LbrM18_V2.0020 | <i>L. braziliensis</i> | 59  | 681  | 739  |
| LbrM18_V2.0030 | <i>L. braziliensis</i> | 41  | 203  | 243  |
| LbrM18_V2.0040 | <i>L. braziliensis</i> | 56  | 82   | 137  |
| LbrM18_V2.0040 | <i>L. braziliensis</i> | 42  | 179  | 220  |
| LbrM18_V2.0080 | <i>L. braziliensis</i> | 43  | 115  | 157  |
| LbrM18_V2.0090 | <i>L. braziliensis</i> | 56  | 110  | 165  |
| LbrM18_V2.0090 | <i>L. braziliensis</i> | 151 | 188  | 338  |
| LbrM18_V2.0090 | <i>L. braziliensis</i> | 287 | 364  | 650  |
| LbrM18_V2.0100 | <i>L. braziliensis</i> | 41  | 402  | 442  |
| LbrM18_V2.0120 | <i>L. braziliensis</i> | 72  | 123  | 194  |
| LbrM18_V2.0130 | <i>L. braziliensis</i> | 50  | 312  | 361  |
| LbrM18_V2.0150 | <i>L. braziliensis</i> | 55  | 292  | 346  |
| LbrM18_V2.0150 | <i>L. braziliensis</i> | 53  | 589  | 641  |
| LbrM18_V2.0150 | <i>L. braziliensis</i> | 53  | 589  | 641  |
| LbrM18_V2.0160 | <i>L. braziliensis</i> | 44  | 542  | 585  |
| LbrM18_V2.0160 | <i>L. braziliensis</i> | 47  | 700  | 746  |
| LbrM18_V2.0160 | <i>L. braziliensis</i> | 47  | 700  | 746  |
| LbrM18_V2.0180 | <i>L. braziliensis</i> | 44  | 655  | 698  |
| LbrM18_V2.0190 | <i>L. braziliensis</i> | 120 | 209  | 328  |
| LbrM18_V2.0200 | <i>L. braziliensis</i> | 49  | 209  | 257  |
| LbrM18_V2.0210 | <i>L. braziliensis</i> | 48  | 199  | 246  |
| LbrM18_V2.0230 | <i>L. braziliensis</i> | 58  | 173  | 230  |
| LbrM18_V2.0240 | <i>L. braziliensis</i> | 323 | 82   | 404  |
| LbrM18_V2.0250 | <i>L. braziliensis</i> | 124 | 1    | 124  |
| LbrM18_V2.0260 | <i>L. braziliensis</i> | 76  | 250  | 325  |
| LbrM18_V2.0270 | <i>L. braziliensis</i> | 51  | 77   | 127  |

|                |                        |     |      |      |
|----------------|------------------------|-----|------|------|
| LbrM18_V2.0290 | <i>L. braziliensis</i> | 43  | 1    | 43   |
| LbrM18_V2.0300 | <i>L. braziliensis</i> | 88  | 438  | 525  |
| LbrM18_V2.0310 | <i>L. braziliensis</i> | 52  | 14   | 65   |
| LbrM18_V2.0310 | <i>L. braziliensis</i> | 41  | 187  | 227  |
| LbrM18_V2.0310 | <i>L. braziliensis</i> | 41  | 187  | 227  |
| LbrM18_V2.0320 | <i>L. braziliensis</i> | 112 | 137  | 248  |
| LbrM18_V2.0320 | <i>L. braziliensis</i> | 55  | 309  | 363  |
| LbrM18_V2.0320 | <i>L. braziliensis</i> | 55  | 309  | 363  |
| LbrM18_V2.0350 | <i>L. braziliensis</i> | 74  | 102  | 175  |
| LbrM18_V2.0360 | <i>L. braziliensis</i> | 71  | 1    | 71   |
| LbrM18_V2.0360 | <i>L. braziliensis</i> | 41  | 364  | 404  |
| LbrM18_V2.0370 | <i>L. braziliensis</i> | 121 | 1    | 121  |
| LbrM18_V2.0390 | <i>L. braziliensis</i> | 52  | 155  | 206  |
| LbrM18_V2.0400 | <i>L. braziliensis</i> | 72  | 1    | 72   |
| LbrM18_V2.0400 | <i>L. braziliensis</i> | 68  | 428  | 495  |
| LbrM18_V2.0400 | <i>L. braziliensis</i> | 44  | 967  | 1010 |
| LbrM18_V2.0410 | <i>L. braziliensis</i> | 787 | 1    | 787  |
| LbrM18_V2.0410 | <i>L. braziliensis</i> | 174 | 832  | 1005 |
| LbrM18_V2.0410 | <i>L. braziliensis</i> | 190 | 1167 | 1356 |
| LbrM18_V2.0430 | <i>L. braziliensis</i> | 57  | 98   | 154  |
| LbrM18_V2.0440 | <i>L. braziliensis</i> | 61  | 38   | 98   |
| LbrM18_V2.0450 | <i>L. braziliensis</i> | 101 | 111  | 211  |
| LbrM18_V2.0480 | <i>L. braziliensis</i> | 101 | 111  | 211  |
| LbrM18_V2.0500 | <i>L. braziliensis</i> | 81  | 27   | 107  |
| LbrM18_V2.0500 | <i>L. braziliensis</i> | 52  | 218  | 269  |
| LbrM18_V2.0500 | <i>L. braziliensis</i> | 52  | 218  | 269  |
| LbrM18_V2.0520 | <i>L. braziliensis</i> | 43  | 113  | 155  |
| LbrM18_V2.0530 | <i>L. braziliensis</i> | 60  | 1    | 60   |
| LbrM18_V2.0530 | <i>L. braziliensis</i> | 218 | 129  | 346  |
| LbrM18_V2.0540 | <i>L. braziliensis</i> | 133 | 1    | 133  |
| LbrM18_V2.0550 | <i>L. braziliensis</i> | 100 | 143  | 242  |
| LbrM18_V2.0560 | <i>L. braziliensis</i> | 120 | 1    | 120  |
| LbrM18_V2.0560 | <i>L. braziliensis</i> | 70  | 312  | 381  |
| LbrM18_V2.0560 | <i>L. braziliensis</i> | 70  | 312  | 381  |
| LbrM18_V2.0580 | <i>L. braziliensis</i> | 77  | 1    | 77   |
| LbrM18_V2.0580 | <i>L. braziliensis</i> | 150 | 86   | 235  |
| LbrM18_V2.0580 | <i>L. braziliensis</i> | 50  | 251  | 300  |
| LbrM18_V2.0580 | <i>L. braziliensis</i> | 183 | 324  | 506  |
| LbrM18_V2.0580 | <i>L. braziliensis</i> | 105 | 508  | 612  |
| LbrM18_V2.0590 | <i>L. braziliensis</i> | 41  | 132  | 172  |
| LbrM18_V2.0590 | <i>L. braziliensis</i> | 141 | 382  | 522  |
| LbrM18_V2.0600 | <i>L. braziliensis</i> | 60  | 419  | 478  |
| LbrM18_V2.0610 | <i>L. braziliensis</i> | 106 | 215  | 320  |
| LbrM18_V2.0630 | <i>L. braziliensis</i> | 43  | 566  | 608  |
| LbrM18_V2.0650 | <i>L. braziliensis</i> | 162 | 1    | 162  |
| LbrM18_V2.0650 | <i>L. braziliensis</i> | 212 | 216  | 427  |
| LbrM18_V2.0660 | <i>L. braziliensis</i> | 564 | 1    | 564  |

|                |                        |     |      |      |
|----------------|------------------------|-----|------|------|
| LbrM18_V2.0680 | <i>L. braziliensis</i> | 48  | 27   | 74   |
| LbrM18_V2.0680 | <i>L. braziliensis</i> | 77  | 120  | 196  |
| LbrM18_V2.0700 | <i>L. braziliensis</i> | 49  | 1    | 49   |
| LbrM18_V2.0710 | <i>L. braziliensis</i> | 323 | 1    | 323  |
| LbrM18_V2.0710 | <i>L. braziliensis</i> | 150 | 343  | 492  |
| LbrM18_V2.0730 | <i>L. braziliensis</i> | 104 | 59   | 162  |
| LbrM18_V2.0730 | <i>L. braziliensis</i> | 59  | 251  | 309  |
| LbrM18_V2.0730 | <i>L. braziliensis</i> | 64  | 352  | 415  |
| LbrM18_V2.0730 | <i>L. braziliensis</i> | 57  | 462  | 518  |
| LbrM18_V2.0730 | <i>L. braziliensis</i> | 96  | 603  | 698  |
| LbrM18_V2.0730 | <i>L. braziliensis</i> | 83  | 804  | 886  |
| LbrM18_V2.0730 | <i>L. braziliensis</i> | 53  | 982  | 1034 |
| LbrM18_V2.0730 | <i>L. braziliensis</i> | 45  | 1196 | 1240 |
| LbrM18_V2.0740 | <i>L. braziliensis</i> | 114 | 596  | 709  |
| LbrM18_V2.0750 | <i>L. braziliensis</i> | 70  | 1    | 70   |
| LbrM18_V2.0750 | <i>L. braziliensis</i> | 128 | 89   | 216  |
| LbrM18_V2.0750 | <i>L. braziliensis</i> | 120 | 517  | 636  |
| LbrM18_V2.0750 | <i>L. braziliensis</i> | 103 | 650  | 752  |
| LbrM18_V2.0760 | <i>L. braziliensis</i> | 52  | 1    | 52   |
| LbrM18_V2.0780 | <i>L. braziliensis</i> | 82  | 197  | 278  |
| LbrM18_V2.0780 | <i>L. braziliensis</i> | 63  | 331  | 393  |
| LbrM18_V2.0780 | <i>L. braziliensis</i> | 141 | 624  | 764  |
| LbrM18_V2.0780 | <i>L. braziliensis</i> | 93  | 771  | 863  |
| LbrM18_V2.0780 | <i>L. braziliensis</i> | 76  | 934  | 1009 |
| LbrM18_V2.0780 | <i>L. braziliensis</i> | 52  | 1117 | 1168 |
| LbrM18_V2.0780 | <i>L. braziliensis</i> | 222 | 1239 | 1460 |
| LbrM18_V2.0780 | <i>L. braziliensis</i> | 41  | 1499 | 1539 |
| LbrM18_V2.0780 | <i>L. braziliensis</i> | 70  | 1570 | 1639 |
| LbrM18_V2.0810 | <i>L. braziliensis</i> | 83  | 165  | 247  |
| LbrM18_V2.0810 | <i>L. braziliensis</i> | 153 | 367  | 519  |
| LbrM18_V2.0810 | <i>L. braziliensis</i> | 42  | 682  | 723  |
| LbrM18_V2.0820 | <i>L. braziliensis</i> | 119 | 1    | 119  |
| LbrM18_V2.0820 | <i>L. braziliensis</i> | 55  | 121  | 175  |
| LbrM18_V2.0830 | <i>L. braziliensis</i> | 41  | 361  | 401  |
| LbrM18_V2.0840 | <i>L. braziliensis</i> | 105 | 43   | 147  |
| LbrM18_V2.0840 | <i>L. braziliensis</i> | 105 | 334  | 438  |
| LbrM18_V2.0840 | <i>L. braziliensis</i> | 49  | 476  | 524  |
| LbrM18_V2.0850 | <i>L. braziliensis</i> | 78  | 1    | 78   |
| LbrM18_V2.0860 | <i>L. braziliensis</i> | 51  | 88   | 138  |
| LbrM18_V2.0860 | <i>L. braziliensis</i> | 389 | 189  | 577  |
| LbrM18_V2.0860 | <i>L. braziliensis</i> | 114 | 682  | 795  |
| LbrM18_V2.0860 | <i>L. braziliensis</i> | 178 | 927  | 1104 |
| LbrM18_V2.0860 | <i>L. braziliensis</i> | 253 | 1150 | 1402 |
| LbrM18_V2.0860 | <i>L. braziliensis</i> | 61  | 1409 | 1469 |
| LbrM18_V2.0860 | <i>L. braziliensis</i> | 222 | 1500 | 1721 |
| LbrM18_V2.0870 | <i>L. braziliensis</i> | 41  | 147  | 187  |
| LbrM18_V2.0880 | <i>L. braziliensis</i> | 47  | 67   | 113  |

|                |                        |     |      |      |
|----------------|------------------------|-----|------|------|
| LbrM18_V2.0880 | <i>L. braziliensis</i> | 73  | 133  | 205  |
| LbrM18_V2.0880 | <i>L. braziliensis</i> | 73  | 133  | 205  |
| LbrM18_V2.0890 | <i>L. braziliensis</i> | 52  | 75   | 126  |
| LbrM18_V2.0890 | <i>L. braziliensis</i> | 53  | 133  | 185  |
| LbrM18_V2.0890 | <i>L. braziliensis</i> | 53  | 133  | 185  |
| LbrM18_V2.0910 | <i>L. braziliensis</i> | 41  | 1827 | 1867 |
| LbrM18_V2.0920 | <i>L. braziliensis</i> | 44  | 244  | 287  |
| LbrM18_V2.0920 | <i>L. braziliensis</i> | 42  | 714  | 755  |
| LbrM18_V2.0920 | <i>L. braziliensis</i> | 42  | 714  | 755  |
| LbrM18_V2.0930 | <i>L. braziliensis</i> | 55  | 97   | 151  |
| LbrM18_V2.0930 | <i>L. braziliensis</i> | 126 | 342  | 467  |
| LbrM18_V2.0940 | <i>L. braziliensis</i> | 40  | 225  | 264  |
| LbrM18_V2.0940 | <i>L. braziliensis</i> | 54  | 552  | 605  |
| LbrM18_V2.0940 | <i>L. braziliensis</i> | 54  | 737  | 790  |
| LbrM18_V2.0940 | <i>L. braziliensis</i> | 64  | 806  | 869  |
| LbrM18_V2.0950 | <i>L. braziliensis</i> | 40  | 138  | 177  |
| LbrM18_V2.0960 | <i>L. braziliensis</i> | 85  | 49   | 133  |
| LbrM18_V2.0960 | <i>L. braziliensis</i> | 41  | 801  | 841  |
| LbrM18_V2.0970 | <i>L. braziliensis</i> | 96  | 64   | 159  |
| LbrM18_V2.0970 | <i>L. braziliensis</i> | 41  | 188  | 228  |
| LbrM18_V2.0970 | <i>L. braziliensis</i> | 49  | 334  | 382  |
| LbrM18_V2.0970 | <i>L. braziliensis</i> | 52  | 629  | 680  |
| LbrM18_V2.0970 | <i>L. braziliensis</i> | 110 | 926  | 1035 |
| LbrM18_V2.0970 | <i>L. braziliensis</i> | 84  | 1053 | 1136 |
| LbrM18_V2.0980 | <i>L. braziliensis</i> | 113 | 430  | 542  |
| LbrM18_V2.0990 | <i>L. braziliensis</i> | 101 | 85   | 185  |
| LbrM18_V2.0990 | <i>L. braziliensis</i> | 204 | 234  | 437  |
| LbrM18_V2.0990 | <i>L. braziliensis</i> | 144 | 444  | 587  |
| LbrM18_V2.0990 | <i>L. braziliensis</i> | 72  | 626  | 697  |
| LbrM18_V2.0990 | <i>L. braziliensis</i> | 194 | 700  | 893  |
| LbrM18_V2.1010 | <i>L. braziliensis</i> | 47  | 319  | 365  |
| LbrM18_V2.1020 | <i>L. braziliensis</i> | 59  | 143  | 201  |
| LbrM18_V2.1020 | <i>L. braziliensis</i> | 40  | 1007 | 1046 |
| LbrM18_V2.1020 | <i>L. braziliensis</i> | 128 | 1141 | 1268 |
| LbrM18_V2.1030 | <i>L. braziliensis</i> | 70  | 40   | 109  |
| LbrM18_V2.1030 | <i>L. braziliensis</i> | 170 | 139  | 308  |
| LbrM18_V2.1030 | <i>L. braziliensis</i> | 64  | 409  | 472  |
| LbrM18_V2.1040 | <i>L. braziliensis</i> | 191 | 1    | 191  |
| LbrM18_V2.1060 | <i>L. braziliensis</i> | 41  | 1    | 41   |
| LbrM18_V2.1080 | <i>L. braziliensis</i> | 254 | 1    | 254  |
| LbrM18_V2.1080 | <i>L. braziliensis</i> | 47  | 277  | 323  |
| LbrM18_V2.1080 | <i>L. braziliensis</i> | 190 | 335  | 524  |
| LbrM18_V2.1080 | <i>L. braziliensis</i> | 179 | 541  | 719  |
| LbrM18_V2.1080 | <i>L. braziliensis</i> | 44  | 721  | 764  |
| LbrM18_V2.1080 | <i>L. braziliensis</i> | 166 | 784  | 949  |
| LbrM18_V2.1080 | <i>L. braziliensis</i> | 335 | 1054 | 1388 |
| LbrM18_V2.1080 | <i>L. braziliensis</i> | 91  | 1425 | 1515 |



|                |                        |     |     |      |
|----------------|------------------------|-----|-----|------|
| LbrM18_V2.1100 | <i>L. braziliensis</i> | 44  | 666 | 709  |
| LbrM18_V2.1110 | <i>L. braziliensis</i> | 92  | 1   | 92   |
| LbrM18_V2.1120 | <i>L. braziliensis</i> | 48  | 14  | 61   |
| LbrM18_V2.1120 | <i>L. braziliensis</i> | 151 | 105 | 255  |
| LbrM18_V2.1120 | <i>L. braziliensis</i> | 185 | 421 | 605  |
| LbrM18_V2.1130 | <i>L. braziliensis</i> | 376 | 20  | 395  |
| LbrM18_V2.1130 | <i>L. braziliensis</i> | 69  | 543 | 611  |
| LbrM18_V2.1130 | <i>L. braziliensis</i> | 55  | 629 | 683  |
| LbrM18_V2.1150 | <i>L. braziliensis</i> | 61  | 207 | 267  |
| LbrM18_V2.1150 | <i>L. braziliensis</i> | 47  | 915 | 961  |
| LbrM18_V2.1190 | <i>L. braziliensis</i> | 63  | 189 | 251  |
| LbrM18_V2.1200 | <i>L. braziliensis</i> | 49  | 131 | 179  |
| LbrM18_V2.1210 | <i>L. braziliensis</i> | 41  | 154 | 194  |
| LbrM18_V2.1220 | <i>L. braziliensis</i> | 105 | 84  | 188  |
| LbrM18_V2.1240 | <i>L. braziliensis</i> | 146 | 1   | 146  |
| LbrM18_V2.1240 | <i>L. braziliensis</i> | 687 | 155 | 841  |
| LbrM18_V2.1240 | <i>L. braziliensis</i> | 146 | 871 | 1016 |
| LbrM18_V2.1250 | <i>L. braziliensis</i> | 79  | 1   | 79   |
| LbrM18_V2.1280 | <i>L. braziliensis</i> | 72  | 1   | 72   |
| LbrM18_V2.1280 | <i>L. braziliensis</i> | 295 | 120 | 414  |
| LbrM18_V2.1280 | <i>L. braziliensis</i> | 59  | 441 | 499  |
| LbrM18_V2.1280 | <i>L. braziliensis</i> | 195 | 537 | 731  |
| LbrM18_V2.1280 | <i>L. braziliensis</i> | 87  | 768 | 854  |
| LbrM18_V2.1280 | <i>L. braziliensis</i> | 378 | 876 | 1253 |
| LbrM18_V2.1290 | <i>L. braziliensis</i> | 43  | 1   | 43   |
| LbrM18_V2.1290 | <i>L. braziliensis</i> | 49  | 161 | 209  |
| LbrM18_V2.1290 | <i>L. braziliensis</i> | 50  | 534 | 583  |
| LbrM18_V2.1300 | <i>L. braziliensis</i> | 184 | 154 | 337  |
| LbrM18_V2.1300 | <i>L. braziliensis</i> | 46  | 343 | 388  |
| LbrM18_V2.1310 | <i>L. braziliensis</i> | 43  | 654 | 696  |
| LbrM18_V2.1320 | <i>L. braziliensis</i> | 45  | 36  | 80   |
| LbrM18_V2.1320 | <i>L. braziliensis</i> | 164 | 90  | 253  |
| LbrM18_V2.1320 | <i>L. braziliensis</i> | 40  | 337 | 376  |
| LbrM18_V2.1330 | <i>L. braziliensis</i> | 99  | 1   | 99   |
| LbrM18_V2.1330 | <i>L. braziliensis</i> | 105 | 115 | 219  |
| LbrM18_V2.1330 | <i>L. braziliensis</i> | 93  | 273 | 365  |
| LbrM18_V2.1330 | <i>L. braziliensis</i> | 299 | 467 | 765  |
| LbrM18_V2.1340 | <i>L. braziliensis</i> | 53  | 1   | 53   |
| LbrM18_V2.1340 | <i>L. braziliensis</i> | 175 | 133 | 307  |
| LbrM18_V2.1340 | <i>L. braziliensis</i> | 64  | 323 | 386  |
| LbrM18_V2.1340 | <i>L. braziliensis</i> | 90  | 420 | 509  |
| LbrM18_V2.1340 | <i>L. braziliensis</i> | 181 | 528 | 708  |
| LbrM18_V2.1340 | <i>L. braziliensis</i> | 55  | 757 | 811  |
| LbrM18_V2.1370 | <i>L. braziliensis</i> | 41  | 1   | 41   |
| LbrM18_V2.1370 | <i>L. braziliensis</i> | 83  | 104 | 186  |
| LbrM18_V2.1370 | <i>L. braziliensis</i> | 65  | 275 | 339  |
| LbrM18_V2.1370 | <i>L. braziliensis</i> | 107 | 456 | 562  |

|                |                        |     |      |      |
|----------------|------------------------|-----|------|------|
| LbrM18_V2.1390 | <i>L. braziliensis</i> | 303 | 1    | 303  |
| LbrM18_V2.1390 | <i>L. braziliensis</i> | 312 | 351  | 662  |
| LbrM18_V2.1390 | <i>L. braziliensis</i> | 268 | 695  | 962  |
| LbrM18_V2.1400 | <i>L. braziliensis</i> | 84  | 513  | 596  |
| LbrM18_V2.1400 | <i>L. braziliensis</i> | 84  | 738  | 821  |
| LbrM18_V2.1410 | <i>L. braziliensis</i> | 50  | 1    | 50   |
| LbrM18_V2.1410 | <i>L. braziliensis</i> | 76  | 282  | 357  |
| LbrM18_V2.1410 | <i>L. braziliensis</i> | 76  | 282  | 357  |
| LbrM18_V2.1420 | <i>L. braziliensis</i> | 47  | 1    | 47   |
| LbrM18_V2.1440 | <i>L. braziliensis</i> | 180 | 72   | 251  |
| LbrM18_V2.1440 | <i>L. braziliensis</i> | 137 | 255  | 391  |
| LbrM18_V2.1440 | <i>L. braziliensis</i> | 227 | 407  | 633  |
| LbrM18_V2.1440 | <i>L. braziliensis</i> | 83  | 671  | 753  |
| LbrM18_V2.1440 | <i>L. braziliensis</i> | 44  | 797  | 840  |
| LbrM18_V2.1440 | <i>L. braziliensis</i> | 64  | 847  | 910  |
| LbrM18_V2.1440 | <i>L. braziliensis</i> | 92  | 943  | 1034 |
| LbrM18_V2.1450 | <i>L. braziliensis</i> | 66  | 87   | 152  |
| LbrM18_V2.1450 | <i>L. braziliensis</i> | 320 | 530  | 849  |
| LbrM18_V2.1460 | <i>L. braziliensis</i> | 500 | 113  | 612  |
| LbrM18_V2.1460 | <i>L. braziliensis</i> | 116 | 794  | 909  |
| LbrM18_V2.1460 | <i>L. braziliensis</i> | 66  | 921  | 986  |
| LbrM18_V2.1460 | <i>L. braziliensis</i> | 109 | 994  | 1102 |
| LbrM18_V2.1470 | <i>L. braziliensis</i> | 47  | 62   | 108  |
| LbrM18_V2.1480 | <i>L. braziliensis</i> | 170 | 1    | 170  |
| LbrM18_V2.1480 | <i>L. braziliensis</i> | 689 | 175  | 863  |
| LbrM18_V2.1480 | <i>L. braziliensis</i> | 60  | 953  | 1012 |
| LbrM18_V2.1480 | <i>L. braziliensis</i> | 119 | 1150 | 1268 |
| LbrM18_V2.1480 | <i>L. braziliensis</i> | 63  | 1364 | 1426 |
| LbrM18_V2.1480 | <i>L. braziliensis</i> | 108 | 1487 | 1594 |
| LbrM18_V2.1480 | <i>L. braziliensis</i> | 345 | 1672 | 2016 |
| LbrM18_V2.1490 | <i>L. braziliensis</i> | 231 | 1    | 231  |
| LbrM18_V2.1490 | <i>L. braziliensis</i> | 101 | 269  | 369  |
| LbrM18_V2.1490 | <i>L. braziliensis</i> | 63  | 602  | 664  |
| LbrM18_V2.1500 | <i>L. braziliensis</i> | 41  | 156  | 196  |
| LbrM18_V2.1510 | <i>L. braziliensis</i> | 163 | 1    | 163  |
| LbrM18_V2.1540 | <i>L. braziliensis</i> | 65  | 1    | 65   |
| LbrM18_V2.1540 | <i>L. braziliensis</i> | 96  | 151  | 246  |
| LbrM18_V2.1540 | <i>L. braziliensis</i> | 125 | 407  | 531  |
| LbrM18_V2.1550 | <i>L. braziliensis</i> | 73  | 1    | 73   |
| LbrM18_V2.1560 | <i>L. braziliensis</i> | 62  | 1    | 62   |
| LbrM18_V2.1560 | <i>L. braziliensis</i> | 60  | 161  | 220  |
| LbrM18_V2.1560 | <i>L. braziliensis</i> | 74  | 319  | 392  |
| LbrM18_V2.1560 | <i>L. braziliensis</i> | 138 | 408  | 545  |
| LbrM18_V2.1560 | <i>L. braziliensis</i> | 179 | 758  | 936  |
| LbrM18_V2.1560 | <i>L. braziliensis</i> | 137 | 957  | 1093 |
| LbrM18_V2.1580 | <i>L. braziliensis</i> | 59  | 208  | 266  |
| LbrM18_V2.1630 | <i>L. braziliensis</i> | 85  | 323  | 407  |

|                |                        |     |      |      |
|----------------|------------------------|-----|------|------|
| LbrM18_V2.1630 | <i>L. braziliensis</i> | 220 | 572  | 791  |
| LbrM18_V2.1640 | <i>L. braziliensis</i> | 150 | 1    | 150  |
| LbrM18_V2.1640 | <i>L. braziliensis</i> | 44  | 611  | 654  |
| LbrM18_V2.1670 | <i>L. braziliensis</i> | 74  | 50   | 123  |
| LbrM18_V2.1700 | <i>L. braziliensis</i> | 40  | 229  | 268  |
| LbrM18_V2.1710 | <i>L. braziliensis</i> | 57  | 152  | 208  |
| LbrM18_V2.1710 | <i>L. braziliensis</i> | 221 | 217  | 437  |
| LbrM18_V2.1710 | <i>L. braziliensis</i> | 54  | 452  | 505  |
| LbrM18_V2.1730 | <i>L. braziliensis</i> | 55  | 272  | 326  |
| LbrM18_V2.1740 | <i>L. braziliensis</i> | 82  | 1    | 82   |
| LbrM18_V2.1750 | <i>L. braziliensis</i> | 213 | 125  | 337  |
| LbrM18_V2.1750 | <i>L. braziliensis</i> | 118 | 358  | 475  |
| LbrM18_V2.1750 | <i>L. braziliensis</i> | 67  | 556  | 622  |
| LbrM18_V2.1750 | <i>L. braziliensis</i> | 67  | 648  | 714  |
| LbrM18_V2.1750 | <i>L. braziliensis</i> | 85  | 738  | 822  |
| LbrM18_V2.1750 | <i>L. braziliensis</i> | 114 | 879  | 992  |
| LbrM18_V2.1750 | <i>L. braziliensis</i> | 77  | 1043 | 1119 |
| LbrM18_V2.1750 | <i>L. braziliensis</i> | 45  | 1175 | 1219 |
| LbrM18_V2.1750 | <i>L. braziliensis</i> | 45  | 1225 | 1269 |
| LbrM18_V2.1750 | <i>L. braziliensis</i> | 130 | 1384 | 1513 |
| LbrM18_V2.1750 | <i>L. braziliensis</i> | 43  | 1521 | 1563 |
| LbrM18_V2.1750 | <i>L. braziliensis</i> | 112 | 1618 | 1729 |
| LbrM18_V2.1750 | <i>L. braziliensis</i> | 70  | 1738 | 1807 |
| LbrM18_V2.1750 | <i>L. braziliensis</i> | 92  | 1895 | 1986 |
| LbrM18_V2.1760 | <i>L. braziliensis</i> | 56  | 1    | 56   |
| LbrM18_V2.1760 | <i>L. braziliensis</i> | 134 | 73   | 206  |
| LbrM18_V2.1760 | <i>L. braziliensis</i> | 60  | 303  | 362  |
| LbrM18_V2.1760 | <i>L. braziliensis</i> | 58  | 402  | 459  |
| LbrM18_V2.1760 | <i>L. braziliensis</i> | 92  | 677  | 768  |
| LbrM18_V2.1760 | <i>L. braziliensis</i> | 55  | 880  | 934  |
| LbrM18_V2.1760 | <i>L. braziliensis</i> | 230 | 938  | 1167 |
| LbrM18_V2.1760 | <i>L. braziliensis</i> | 136 | 1506 | 1641 |
| LbrM18_V2.1760 | <i>L. braziliensis</i> | 144 | 1668 | 1811 |
| LbrM18_V2.1760 | <i>L. braziliensis</i> | 90  | 1859 | 1948 |
| LbrM18_V2.1760 | <i>L. braziliensis</i> | 82  | 2114 | 2195 |
| LbrM18_V2.1760 | <i>L. braziliensis</i> | 152 | 2223 | 2374 |
| LbrM18_V2.1760 | <i>L. braziliensis</i> | 143 | 2415 | 2557 |
| LbrM18_V2.1760 | <i>L. braziliensis</i> | 152 | 2642 | 2793 |
| LbrM18_V2.1770 | <i>L. braziliensis</i> | 79  | 62   | 140  |
| LbrM18_V2.1770 | <i>L. braziliensis</i> | 50  | 190  | 239  |
| LbrM18_V2.1770 | <i>L. braziliensis</i> | 82  | 584  | 665  |
| LbrM18_V2.1770 | <i>L. braziliensis</i> | 46  | 738  | 783  |
| LbrM18_V2.1780 | <i>L. braziliensis</i> | 187 | 1    | 187  |
| LbrM18_V2.1780 | <i>L. braziliensis</i> | 445 | 207  | 651  |
| LbrM18_V2.1780 | <i>L. braziliensis</i> | 191 | 680  | 870  |
| LbrM18_V2.1780 | <i>L. braziliensis</i> | 122 | 1071 | 1192 |
| LbrM18_V2.1780 | <i>L. braziliensis</i> | 336 | 1333 | 1668 |

|                |                        |     |      |      |
|----------------|------------------------|-----|------|------|
| LbrM19_V2.0010 | <i>L. braziliensis</i> | 152 | 1    | 152  |
| LbrM19_V2.0010 | <i>L. braziliensis</i> | 51  | 245  | 295  |
| LbrM19_V2.0010 | <i>L. braziliensis</i> | 87  | 303  | 389  |
| LbrM19_V2.0010 | <i>L. braziliensis</i> | 259 | 574  | 832  |
| LbrM19_V2.0010 | <i>L. braziliensis</i> | 73  | 850  | 922  |
| LbrM19_V2.0010 | <i>L. braziliensis</i> | 88  | 936  | 1023 |
| LbrM19_V2.0010 | <i>L. braziliensis</i> | 57  | 1174 | 1230 |
| LbrM19_V2.0010 | <i>L. braziliensis</i> | 112 | 1550 | 1661 |
| LbrM19_V2.0010 | <i>L. braziliensis</i> | 49  | 1864 | 1912 |
| LbrM19_V2.0010 | <i>L. braziliensis</i> | 60  | 1964 | 2023 |
| LbrM19_V2.0020 | <i>L. braziliensis</i> | 160 | 107  | 266  |
| LbrM19_V2.0030 | <i>L. braziliensis</i> | 403 | 1    | 403  |
| LbrM19_V2.0030 | <i>L. braziliensis</i> | 69  | 429  | 497  |
| LbrM19_V2.0040 | <i>L. braziliensis</i> | 40  | 1    | 40   |
| LbrM19_V2.0040 | <i>L. braziliensis</i> | 236 | 90   | 325  |
| LbrM19_V2.0040 | <i>L. braziliensis</i> | 49  | 550  | 598  |
| LbrM19_V2.0040 | <i>L. braziliensis</i> | 41  | 706  | 746  |
| LbrM19_V2.0050 | <i>L. braziliensis</i> | 134 | 87   | 220  |
| LbrM19_V2.0060 | <i>L. braziliensis</i> | 44  | 442  | 485  |
| LbrM19_V2.0070 | <i>L. braziliensis</i> | 251 | 1    | 251  |
| LbrM19_V2.0070 | <i>L. braziliensis</i> | 243 | 271  | 513  |
| LbrM19_V2.0070 | <i>L. braziliensis</i> | 78  | 574  | 651  |
| LbrM19_V2.0070 | <i>L. braziliensis</i> | 49  | 781  | 829  |
| LbrM19_V2.0070 | <i>L. braziliensis</i> | 173 | 864  | 1036 |
| LbrM19_V2.0090 | <i>L. braziliensis</i> | 51  | 37   | 87   |
| LbrM19_V2.0090 | <i>L. braziliensis</i> | 60  | 375  | 434  |
| LbrM19_V2.0090 | <i>L. braziliensis</i> | 60  | 375  | 434  |
| LbrM19_V2.0120 | <i>L. braziliensis</i> | 179 | 1    | 179  |
| LbrM19_V2.0130 | <i>L. braziliensis</i> | 74  | 438  | 511  |
| LbrM19_V2.0130 | <i>L. braziliensis</i> | 56  | 597  | 652  |
| LbrM19_V2.0150 | <i>L. braziliensis</i> | 181 | 95   | 275  |
| LbrM19_V2.0150 | <i>L. braziliensis</i> | 59  | 297  | 355  |
| LbrM19_V2.0150 | <i>L. braziliensis</i> | 314 | 390  | 703  |
| LbrM19_V2.0160 | <i>L. braziliensis</i> | 72  | 158  | 229  |
| LbrM19_V2.0160 | <i>L. braziliensis</i> | 54  | 990  | 1043 |
| LbrM19_V2.0170 | <i>L. braziliensis</i> | 203 | 1    | 203  |
| LbrM19_V2.0170 | <i>L. braziliensis</i> | 356 | 281  | 636  |
| LbrM19_V2.0170 | <i>L. braziliensis</i> | 153 | 660  | 812  |
| LbrM19_V2.0170 | <i>L. braziliensis</i> | 42  | 842  | 883  |
| LbrM19_V2.0180 | <i>L. braziliensis</i> | 96  | 138  | 233  |
| LbrM19_V2.0220 | <i>L. braziliensis</i> | 61  | 51   | 111  |
| LbrM19_V2.0230 | <i>L. braziliensis</i> | 49  | 302  | 350  |
| LbrM19_V2.0230 | <i>L. braziliensis</i> | 47  | 578  | 624  |
| LbrM19_V2.0230 | <i>L. braziliensis</i> | 47  | 578  | 624  |
| LbrM19_V2.0240 | <i>L. braziliensis</i> | 85  | 1    | 85   |
| LbrM19_V2.0240 | <i>L. braziliensis</i> | 55  | 161  | 215  |
| LbrM19_V2.0240 | <i>L. braziliensis</i> | 55  | 161  | 215  |

|                |                        |     |      |      |
|----------------|------------------------|-----|------|------|
| LbrM19_V2.0250 | <i>L. braziliensis</i> | 77  | 1    | 77   |
| LbrM19_V2.0250 | <i>L. braziliensis</i> | 512 | 125  | 636  |
| LbrM19_V2.0250 | <i>L. braziliensis</i> | 104 | 740  | 843  |
| LbrM19_V2.0260 | <i>L. braziliensis</i> | 46  | 132  | 177  |
| LbrM19_V2.0260 | <i>L. braziliensis</i> | 96  | 352  | 447  |
| LbrM19_V2.0270 | <i>L. braziliensis</i> | 61  | 378  | 438  |
| LbrM19_V2.0270 | <i>L. braziliensis</i> | 42  | 586  | 627  |
| LbrM19_V2.0270 | <i>L. braziliensis</i> | 42  | 586  | 627  |
| LbrM19_V2.0280 | <i>L. braziliensis</i> | 63  | 239  | 301  |
| LbrM19_V2.0290 | <i>L. braziliensis</i> | 54  | 254  | 307  |
| LbrM19_V2.0310 | <i>L. braziliensis</i> | 120 | 99   | 218  |
| LbrM19_V2.0320 | <i>L. braziliensis</i> | 143 | 1    | 143  |
| LbrM19_V2.0320 | <i>L. braziliensis</i> | 95  | 149  | 243  |
| LbrM19_V2.0330 | <i>L. braziliensis</i> | 85  | 1    | 85   |
| LbrM19_V2.0330 | <i>L. braziliensis</i> | 153 | 101  | 253  |
| LbrM19_V2.0340 | <i>L. braziliensis</i> | 57  | 62   | 118  |
| LbrM19_V2.0350 | <i>L. braziliensis</i> | 57  | 62   | 118  |
| LbrM19_V2.0360 | <i>L. braziliensis</i> | 47  | 1    | 47   |
| LbrM19_V2.0370 | <i>L. braziliensis</i> | 53  | 1    | 53   |
| LbrM19_V2.0380 | <i>L. braziliensis</i> | 131 | 1    | 131  |
| LbrM19_V2.0380 | <i>L. braziliensis</i> | 62  | 262  | 323  |
| LbrM19_V2.0390 | <i>L. braziliensis</i> | 376 | 57   | 432  |
| LbrM19_V2.0400 | <i>L. braziliensis</i> | 49  | 1    | 49   |
| LbrM19_V2.0400 | <i>L. braziliensis</i> | 58  | 149  | 206  |
| LbrM19_V2.0400 | <i>L. braziliensis</i> | 53  | 243  | 295  |
| LbrM19_V2.0410 | <i>L. braziliensis</i> | 112 | 89   | 200  |
| LbrM19_V2.0420 | <i>L. braziliensis</i> | 122 | 1    | 122  |
| LbrM19_V2.0440 | <i>L. braziliensis</i> | 43  | 211  | 253  |
| LbrM19_V2.0450 | <i>L. braziliensis</i> | 191 | 371  | 561  |
| LbrM19_V2.0480 | <i>L. braziliensis</i> | 83  | 116  | 198  |
| LbrM19_V2.0480 | <i>L. braziliensis</i> | 50  | 454  | 503  |
| LbrM19_V2.0480 | <i>L. braziliensis</i> | 97  | 1389 | 1485 |
| LbrM19_V2.0490 | <i>L. braziliensis</i> | 103 | 305  | 407  |
| LbrM19_V2.0500 | <i>L. braziliensis</i> | 87  | 1    | 87   |
| LbrM19_V2.0500 | <i>L. braziliensis</i> | 43  | 121  | 163  |
| LbrM19_V2.0550 | <i>L. braziliensis</i> | 107 | 1    | 107  |
| LbrM19_V2.0550 | <i>L. braziliensis</i> | 83  | 437  | 519  |
| LbrM19_V2.0550 | <i>L. braziliensis</i> | 59  | 614  | 672  |
| LbrM19_V2.0560 | <i>L. braziliensis</i> | 52  | 190  | 241  |
| LbrM19_V2.0560 | <i>L. braziliensis</i> | 94  | 243  | 336  |
| LbrM19_V2.0560 | <i>L. braziliensis</i> | 73  | 670  | 742  |
| LbrM19_V2.0570 | <i>L. braziliensis</i> | 42  | 1    | 42   |
| LbrM19_V2.0570 | <i>L. braziliensis</i> | 157 | 264  | 420  |
| LbrM19_V2.0570 | <i>L. braziliensis</i> | 42  | 517  | 558  |
| LbrM19_V2.0580 | <i>L. braziliensis</i> | 387 | 1    | 387  |
| LbrM19_V2.0580 | <i>L. braziliensis</i> | 343 | 461  | 803  |
| LbrM19_V2.0590 | <i>L. braziliensis</i> | 196 | 431  | 626  |

|                |                        |     |      |      |
|----------------|------------------------|-----|------|------|
| LbrM19_V2.0610 | <i>L. braziliensis</i> | 61  | 1    | 61   |
| LbrM19_V2.0610 | <i>L. braziliensis</i> | 94  | 135  | 228  |
| LbrM19_V2.0620 | <i>L. braziliensis</i> | 75  | 171  | 245  |
| LbrM19_V2.0620 | <i>L. braziliensis</i> | 98  | 295  | 392  |
| LbrM19_V2.0630 | <i>L. braziliensis</i> | 40  | 100  | 139  |
| LbrM19_V2.0640 | <i>L. braziliensis</i> | 63  | 186  | 248  |
| LbrM19_V2.0640 | <i>L. braziliensis</i> | 51  | 399  | 449  |
| LbrM19_V2.0640 | <i>L. braziliensis</i> | 51  | 399  | 449  |
| LbrM19_V2.0660 | <i>L. braziliensis</i> | 59  | 86   | 144  |
| LbrM19_V2.0670 | <i>L. braziliensis</i> | 56  | 46   | 101  |
| LbrM19_V2.0680 | <i>L. braziliensis</i> | 65  | 1    | 65   |
| LbrM19_V2.0680 | <i>L. braziliensis</i> | 121 | 90   | 210  |
| LbrM19_V2.0680 | <i>L. braziliensis</i> | 203 | 226  | 428  |
| LbrM19_V2.0680 | <i>L. braziliensis</i> | 43  | 442  | 484  |
| LbrM19_V2.0680 | <i>L. braziliensis</i> | 174 | 498  | 671  |
| LbrM19_V2.0680 | <i>L. braziliensis</i> | 50  | 701  | 750  |
| LbrM19_V2.0680 | <i>L. braziliensis</i> | 212 | 786  | 997  |
| LbrM19_V2.0680 | <i>L. braziliensis</i> | 143 | 1006 | 1148 |
| LbrM19_V2.0680 | <i>L. braziliensis</i> | 40  | 1307 | 1346 |
| LbrM19_V2.0680 | <i>L. braziliensis</i> | 108 | 1438 | 1545 |
| LbrM19_V2.0680 | <i>L. braziliensis</i> | 68  | 1575 | 1642 |
| LbrM19_V2.0680 | <i>L. braziliensis</i> | 66  | 1802 | 1867 |
| LbrM19_V2.0690 | <i>L. braziliensis</i> | 168 | 1    | 168  |
| LbrM19_V2.0690 | <i>L. braziliensis</i> | 275 | 181  | 455  |
| LbrM19_V2.0690 | <i>L. braziliensis</i> | 44  | 486  | 529  |
| LbrM19_V2.0690 | <i>L. braziliensis</i> | 135 | 546  | 680  |
| LbrM19_V2.0690 | <i>L. braziliensis</i> | 149 | 723  | 871  |
| LbrM19_V2.0690 | <i>L. braziliensis</i> | 87  | 890  | 976  |
| LbrM19_V2.0700 | <i>L. braziliensis</i> | 336 | 187  | 522  |
| LbrM19_V2.0700 | <i>L. braziliensis</i> | 52  | 708  | 759  |
| LbrM19_V2.0700 | <i>L. braziliensis</i> | 46  | 1040 | 1085 |
| LbrM19_V2.0700 | <i>L. braziliensis</i> | 71  | 1106 | 1176 |
| LbrM19_V2.0700 | <i>L. braziliensis</i> | 93  | 1214 | 1306 |
| LbrM19_V2.0700 | <i>L. braziliensis</i> | 153 | 1491 | 1643 |
| LbrM19_V2.0710 | <i>L. braziliensis</i> | 54  | 1    | 54   |
| LbrM19_V2.0720 | <i>L. braziliensis</i> | 44  | 156  | 199  |
| LbrM19_V2.0730 | <i>L. braziliensis</i> | 40  | 1    | 40   |
| LbrM19_V2.0740 | <i>L. braziliensis</i> | 63  | 63   | 125  |
| LbrM19_V2.0750 | <i>L. braziliensis</i> | 60  | 37   | 96   |
| LbrM19_V2.0750 | <i>L. braziliensis</i> | 125 | 159  | 283  |
| LbrM19_V2.0750 | <i>L. braziliensis</i> | 61  | 285  | 345  |
| LbrM19_V2.0750 | <i>L. braziliensis</i> | 45  | 477  | 521  |
| LbrM19_V2.0750 | <i>L. braziliensis</i> | 58  | 822  | 879  |
| LbrM19_V2.0750 | <i>L. braziliensis</i> | 50  | 1086 | 1135 |
| LbrM19_V2.0760 | <i>L. braziliensis</i> | 53  | 1    | 53   |
| LbrM19_V2.0760 | <i>L. braziliensis</i> | 54  | 230  | 283  |
| LbrM19_V2.0760 | <i>L. braziliensis</i> | 69  | 286  | 354  |

|                |                        |     |      |      |
|----------------|------------------------|-----|------|------|
| LbrM19_V2.0770 | <i>L. braziliensis</i> | 152 | 58   | 209  |
| LbrM19_V2.0770 | <i>L. braziliensis</i> | 452 | 211  | 662  |
| LbrM19_V2.0770 | <i>L. braziliensis</i> | 42  | 713  | 754  |
| LbrM19_V2.0770 | <i>L. braziliensis</i> | 58  | 819  | 876  |
| LbrM19_V2.0780 | <i>L. braziliensis</i> | 185 | 51   | 235  |
| LbrM19_V2.0790 | <i>L. braziliensis</i> | 63  | 117  | 179  |
| LbrM19_V2.0790 | <i>L. braziliensis</i> | 92  | 266  | 357  |
| LbrM19_V2.0800 | <i>L. braziliensis</i> | 93  | 1    | 93   |
| LbrM19_V2.0810 | <i>L. braziliensis</i> | 84  | 1    | 84   |
| LbrM19_V2.0820 | <i>L. braziliensis</i> | 106 | 27   | 132  |
| LbrM19_V2.0820 | <i>L. braziliensis</i> | 161 | 139  | 299  |
| LbrM19_V2.0830 | <i>L. braziliensis</i> | 132 | 1    | 132  |
| LbrM19_V2.0830 | <i>L. braziliensis</i> | 118 | 155  | 272  |
| LbrM19_V2.0830 | <i>L. braziliensis</i> | 170 | 341  | 510  |
| LbrM19_V2.0830 | <i>L. braziliensis</i> | 149 | 553  | 701  |
| LbrM19_V2.0830 | <i>L. braziliensis</i> | 90  | 925  | 1014 |
| LbrM19_V2.0840 | <i>L. braziliensis</i> | 50  | 38   | 87   |
| LbrM19_V2.0840 | <i>L. braziliensis</i> | 45  | 154  | 198  |
| LbrM19_V2.0840 | <i>L. braziliensis</i> | 51  | 276  | 326  |
| LbrM19_V2.0840 | <i>L. braziliensis</i> | 67  | 335  | 401  |
| LbrM19_V2.0850 | <i>L. braziliensis</i> | 106 | 34   | 139  |
| LbrM19_V2.0850 | <i>L. braziliensis</i> | 214 | 500  | 713  |
| LbrM19_V2.0860 | <i>L. braziliensis</i> | 65  | 64   | 128  |
| LbrM19_V2.0870 | <i>L. braziliensis</i> | 999 | 1    | 999  |
| LbrM19_V2.0870 | <i>L. braziliensis</i> | 60  | 1040 | 1099 |
| LbrM19_V2.0870 | <i>L. braziliensis</i> | 40  | 1444 | 1483 |
| LbrM19_V2.0870 | <i>L. braziliensis</i> | 56  | 1833 | 1888 |
| LbrM19_V2.0870 | <i>L. braziliensis</i> | 235 | 2495 | 2729 |
| LbrM19_V2.0870 | <i>L. braziliensis</i> | 57  | 2731 | 2787 |
| LbrM19_V2.0870 | <i>L. braziliensis</i> | 238 | 2817 | 3054 |
| LbrM19_V2.0880 | <i>L. braziliensis</i> | 75  | 34   | 108  |
| LbrM19_V2.0880 | <i>L. braziliensis</i> | 66  | 194  | 259  |
| LbrM19_V2.0880 | <i>L. braziliensis</i> | 186 | 340  | 525  |
| LbrM19_V2.0880 | <i>L. braziliensis</i> | 41  | 549  | 589  |
| LbrM19_V2.0880 | <i>L. braziliensis</i> | 186 | 650  | 835  |
| LbrM19_V2.0880 | <i>L. braziliensis</i> | 268 | 1037 | 1304 |
| LbrM19_V2.0880 | <i>L. braziliensis</i> | 141 | 1318 | 1458 |
| LbrM19_V2.0880 | <i>L. braziliensis</i> | 497 | 1466 | 1962 |
| LbrM19_V2.0880 | <i>L. braziliensis</i> | 68  | 2015 | 2082 |
| LbrM19_V2.0880 | <i>L. braziliensis</i> | 84  | 2118 | 2201 |
| LbrM19_V2.0880 | <i>L. braziliensis</i> | 47  | 2340 | 2386 |
| LbrM19_V2.0880 | <i>L. braziliensis</i> | 63  | 2545 | 2607 |
| LbrM19_V2.0880 | <i>L. braziliensis</i> | 301 | 2695 | 2995 |
| LbrM19_V2.0880 | <i>L. braziliensis</i> | 66  | 3056 | 3121 |
| LbrM19_V2.0890 | <i>L. braziliensis</i> | 199 | 245  | 443  |
| LbrM19_V2.0890 | <i>L. braziliensis</i> | 85  | 607  | 691  |
| LbrM19_V2.0890 | <i>L. braziliensis</i> | 70  | 1088 | 1157 |

|                |                        |      |      |      |
|----------------|------------------------|------|------|------|
| LbrM19_V2.0890 | <i>L. braziliensis</i> | 55   | 1196 | 1250 |
| LbrM19_V2.0910 | <i>L. braziliensis</i> | 145  | 1    | 145  |
| LbrM19_V2.0910 | <i>L. braziliensis</i> | 75   | 148  | 222  |
| LbrM19_V2.0910 | <i>L. braziliensis</i> | 40   | 224  | 263  |
| LbrM19_V2.0910 | <i>L. braziliensis</i> | 281  | 285  | 565  |
| LbrM19_V2.0910 | <i>L. braziliensis</i> | 121  | 591  | 711  |
| LbrM19_V2.0910 | <i>L. braziliensis</i> | 178  | 928  | 1105 |
| LbrM19_V2.0910 | <i>L. braziliensis</i> | 70   | 1206 | 1275 |
| LbrM19_V2.0910 | <i>L. braziliensis</i> | 301  | 1300 | 1600 |
| LbrM19_V2.0920 | <i>L. braziliensis</i> | 520  | 1    | 520  |
| LbrM19_V2.0920 | <i>L. braziliensis</i> | 110  | 544  | 653  |
| LbrM19_V2.0920 | <i>L. braziliensis</i> | 69   | 687  | 755  |
| LbrM19_V2.0940 | <i>L. braziliensis</i> | 53   | 63   | 115  |
| LbrM19_V2.0940 | <i>L. braziliensis</i> | 61   | 244  | 304  |
| LbrM19_V2.0940 | <i>L. braziliensis</i> | 46   | 612  | 657  |
| LbrM19_V2.0950 | <i>L. braziliensis</i> | 78   | 1    | 78   |
| LbrM19_V2.0970 | <i>L. braziliensis</i> | 48   | 1    | 48   |
| LbrM19_V2.0970 | <i>L. braziliensis</i> | 46   | 826  | 871  |
| LbrM19_V2.0970 | <i>L. braziliensis</i> | 43   | 1131 | 1173 |
| LbrM19_V2.0970 | <i>L. braziliensis</i> | 49   | 1205 | 1253 |
| LbrM19_V2.0970 | <i>L. braziliensis</i> | 58   | 1340 | 1397 |
| LbrM19_V2.0970 | <i>L. braziliensis</i> | 244  | 1432 | 1675 |
| LbrM19_V2.0970 | <i>L. braziliensis</i> | 130  | 1737 | 1866 |
| LbrM19_V2.0980 | <i>L. braziliensis</i> | 113  | 1    | 113  |
| LbrM19_V2.0990 | <i>L. braziliensis</i> | 152  | 1    | 152  |
| LbrM19_V2.0990 | <i>L. braziliensis</i> | 53   | 186  | 238  |
| LbrM19_V2.0990 | <i>L. braziliensis</i> | 98   | 263  | 360  |
| LbrM19_V2.1000 | <i>L. braziliensis</i> | 86   | 1    | 86   |
| LbrM19_V2.1000 | <i>L. braziliensis</i> | 56   | 160  | 215  |
| LbrM19_V2.1000 | <i>L. braziliensis</i> | 46   | 268  | 313  |
| LbrM19_V2.1000 | <i>L. braziliensis</i> | 69   | 626  | 694  |
| LbrM19_V2.1000 | <i>L. braziliensis</i> | 231  | 740  | 970  |
| LbrM19_V2.1000 | <i>L. braziliensis</i> | 91   | 1007 | 1097 |
| LbrM19_V2.1010 | <i>L. braziliensis</i> | 76   | 1    | 76   |
| LbrM19_V2.1010 | <i>L. braziliensis</i> | 41   | 171  | 211  |
| LbrM19_V2.1010 | <i>L. braziliensis</i> | 72   | 222  | 293  |
| LbrM19_V2.1010 | <i>L. braziliensis</i> | 53   | 333  | 385  |
| LbrM19_V2.1010 | <i>L. braziliensis</i> | 344  | 565  | 908  |
| LbrM19_V2.1010 | <i>L. braziliensis</i> | 1372 | 916  | 2287 |
| LbrM19_V2.1030 | <i>L. braziliensis</i> | 173  | 85   | 257  |
| LbrM19_V2.1040 | <i>L. braziliensis</i> | 75   | 311  | 385  |
| LbrM19_V2.1050 | <i>L. braziliensis</i> | 126  | 126  | 251  |
| LbrM19_V2.1050 | <i>L. braziliensis</i> | 47   | 368  | 414  |
| LbrM19_V2.1060 | <i>L. braziliensis</i> | 102  | 1    | 102  |
| LbrM19_V2.1060 | <i>L. braziliensis</i> | 56   | 116  | 171  |
| LbrM19_V2.1060 | <i>L. braziliensis</i> | 43   | 201  | 243  |
| LbrM19_V2.1060 | <i>L. braziliensis</i> | 49   | 539  | 587  |



|                |                        |     |      |      |
|----------------|------------------------|-----|------|------|
| LbrM19_V2.1070 | <i>L. braziliensis</i> | 117 | 166  | 282  |
| LbrM19_V2.1080 | <i>L. braziliensis</i> | 105 | 1    | 105  |
| LbrM19_V2.1080 | <i>L. braziliensis</i> | 75  | 115  | 189  |
| LbrM19_V2.1100 | <i>L. braziliensis</i> | 80  | 372  | 451  |
| LbrM19_V2.1100 | <i>L. braziliensis</i> | 114 | 632  | 745  |
| LbrM19_V2.1110 | <i>L. braziliensis</i> | 63  | 1    | 63   |
| LbrM19_V2.1110 | <i>L. braziliensis</i> | 54  | 311  | 364  |
| LbrM19_V2.1120 | <i>L. braziliensis</i> | 42  | 52   | 93   |
| LbrM19_V2.1120 | <i>L. braziliensis</i> | 153 | 729  | 881  |
| LbrM19_V2.1120 | <i>L. braziliensis</i> | 153 | 729  | 881  |
| LbrM19_V2.1160 | <i>L. braziliensis</i> | 79  | 1    | 79   |
| LbrM19_V2.1160 | <i>L. braziliensis</i> | 57  | 162  | 218  |
| LbrM19_V2.1190 | <i>L. braziliensis</i> | 62  | 59   | 120  |
| LbrM19_V2.1190 | <i>L. braziliensis</i> | 88  | 248  | 335  |
| LbrM19_V2.1190 | <i>L. braziliensis</i> | 70  | 379  | 448  |
| LbrM19_V2.1190 | <i>L. braziliensis</i> | 232 | 503  | 734  |
| LbrM19_V2.1200 | <i>L. braziliensis</i> | 457 | 106  | 562  |
| LbrM19_V2.1210 | <i>L. braziliensis</i> | 56  | 118  | 173  |
| LbrM19_V2.1210 | <i>L. braziliensis</i> | 186 | 191  | 376  |
| LbrM19_V2.1210 | <i>L. braziliensis</i> | 57  | 479  | 535  |
| LbrM19_V2.1210 | <i>L. braziliensis</i> | 81  | 551  | 631  |
| LbrM19_V2.1210 | <i>L. braziliensis</i> | 45  | 642  | 686  |
| LbrM19_V2.1240 | <i>L. braziliensis</i> | 46  | 62   | 107  |
| LbrM19_V2.1240 | <i>L. braziliensis</i> | 52  | 215  | 266  |
| LbrM19_V2.1240 | <i>L. braziliensis</i> | 119 | 278  | 396  |
| LbrM19_V2.1240 | <i>L. braziliensis</i> | 84  | 678  | 761  |
| LbrM19_V2.1240 | <i>L. braziliensis</i> | 69  | 805  | 873  |
| LbrM19_V2.1240 | <i>L. braziliensis</i> | 79  | 920  | 998  |
| LbrM19_V2.1240 | <i>L. braziliensis</i> | 74  | 1081 | 1154 |
| LbrM19_V2.1240 | <i>L. braziliensis</i> | 50  | 1234 | 1283 |
| LbrM19_V2.1240 | <i>L. braziliensis</i> | 55  | 1386 | 1440 |
| LbrM19_V2.1240 | <i>L. braziliensis</i> | 41  | 1516 | 1556 |
| LbrM19_V2.1240 | <i>L. braziliensis</i> | 96  | 1648 | 1743 |
| LbrM19_V2.1240 | <i>L. braziliensis</i> | 64  | 1752 | 1815 |
| LbrM19_V2.1240 | <i>L. braziliensis</i> | 47  | 1944 | 1990 |
| LbrM19_V2.1240 | <i>L. braziliensis</i> | 46  | 2088 | 2133 |
| LbrM19_V2.1240 | <i>L. braziliensis</i> | 89  | 2274 | 2362 |
| LbrM19_V2.1240 | <i>L. braziliensis</i> | 43  | 2544 | 2586 |
| LbrM19_V2.1240 | <i>L. braziliensis</i> | 57  | 2632 | 2688 |
| LbrM19_V2.1240 | <i>L. braziliensis</i> | 118 | 2787 | 2904 |
| LbrM19_V2.1240 | <i>L. braziliensis</i> | 72  | 2939 | 3010 |
| LbrM19_V2.1240 | <i>L. braziliensis</i> | 47  | 3055 | 3101 |
| LbrM19_V2.1240 | <i>L. braziliensis</i> | 50  | 3156 | 3205 |
| LbrM19_V2.1240 | <i>L. braziliensis</i> | 94  | 3324 | 3417 |
| LbrM19_V2.1240 | <i>L. braziliensis</i> | 44  | 3435 | 3478 |
| LbrM19_V2.1240 | <i>L. braziliensis</i> | 60  | 3647 | 3706 |
| LbrM19_V2.1240 | <i>L. braziliensis</i> | 43  | 3804 | 3846 |

|                |                        |     |      |      |
|----------------|------------------------|-----|------|------|
| LbrM19_V2.1240 | <i>L. braziliensis</i> | 112 | 3995 | 4106 |
| LbrM19_V2.1240 | <i>L. braziliensis</i> | 140 | 4240 | 4379 |
| LbrM19_V2.1240 | <i>L. braziliensis</i> | 130 | 4429 | 4558 |
| LbrM19_V2.1240 | <i>L. braziliensis</i> | 61  | 4697 | 4757 |
| LbrM19_V2.1240 | <i>L. braziliensis</i> | 44  | 4814 | 4857 |
| LbrM19_V2.1240 | <i>L. braziliensis</i> | 121 | 4878 | 4998 |
| LbrM19_V2.1240 | <i>L. braziliensis</i> | 149 | 5110 | 5258 |
| LbrM19_V2.1240 | <i>L. braziliensis</i> | 74  | 5284 | 5357 |
| LbrM19_V2.1240 | <i>L. braziliensis</i> | 86  | 5364 | 5449 |
| LbrM19_V2.1240 | <i>L. braziliensis</i> | 73  | 5531 | 5603 |
| LbrM19_V2.1240 | <i>L. braziliensis</i> | 42  | 5606 | 5647 |
| LbrM19_V2.1250 | <i>L. braziliensis</i> | 137 | 41   | 177  |
| LbrM19_V2.1250 | <i>L. braziliensis</i> | 107 | 200  | 306  |
| LbrM19_V2.1250 | <i>L. braziliensis</i> | 66  | 351  | 416  |
| LbrM19_V2.1250 | <i>L. braziliensis</i> | 49  | 449  | 497  |
| LbrM19_V2.1260 | <i>L. braziliensis</i> | 165 | 1    | 165  |
| LbrM19_V2.1260 | <i>L. braziliensis</i> | 390 | 232  | 621  |
| LbrM19_V2.1260 | <i>L. braziliensis</i> | 65  | 677  | 741  |
| LbrM19_V2.1260 | <i>L. braziliensis</i> | 80  | 883  | 962  |
| LbrM19_V2.1280 | <i>L. braziliensis</i> | 46  | 503  | 548  |
| LbrM19_V2.1290 | <i>L. braziliensis</i> | 72  | 66   | 137  |
| LbrM19_V2.1290 | <i>L. braziliensis</i> | 56  | 232  | 287  |
| LbrM19_V2.1290 | <i>L. braziliensis</i> | 72  | 335  | 406  |
| LbrM19_V2.1290 | <i>L. braziliensis</i> | 111 | 410  | 520  |
| LbrM19_V2.1290 | <i>L. braziliensis</i> | 148 | 575  | 722  |
| LbrM19_V2.1300 | <i>L. braziliensis</i> | 76  | 1    | 76   |
| LbrM19_V2.1300 | <i>L. braziliensis</i> | 51  | 322  | 372  |
| LbrM19_V2.1300 | <i>L. braziliensis</i> | 51  | 322  | 372  |
| LbrM19_V2.1310 | <i>L. braziliensis</i> | 76  | 1    | 76   |
| LbrM19_V2.1310 | <i>L. braziliensis</i> | 40  | 85   | 124  |
| LbrM19_V2.1310 | <i>L. braziliensis</i> | 138 | 148  | 285  |
| LbrM19_V2.1330 | <i>L. braziliensis</i> | 47  | 1    | 47   |
| LbrM19_V2.1330 | <i>L. braziliensis</i> | 468 | 101  | 568  |
| LbrM19_V2.1330 | <i>L. braziliensis</i> | 189 | 693  | 881  |
| LbrM19_V2.1330 | <i>L. braziliensis</i> | 83  | 888  | 970  |
| LbrM19_V2.1330 | <i>L. braziliensis</i> | 210 | 1017 | 1226 |
| LbrM19_V2.1340 | <i>L. braziliensis</i> | 98  | 27   | 124  |
| LbrM19_V2.1340 | <i>L. braziliensis</i> | 351 | 231  | 581  |
| LbrM19_V2.1340 | <i>L. braziliensis</i> | 65  | 638  | 702  |
| LbrM19_V2.1340 | <i>L. braziliensis</i> | 108 | 816  | 923  |
| LbrM19_V2.1340 | <i>L. braziliensis</i> | 158 | 959  | 1116 |
| LbrM19_V2.1340 | <i>L. braziliensis</i> | 218 | 1166 | 1383 |
| LbrM19_V2.1350 | <i>L. braziliensis</i> | 110 | 184  | 293  |
| LbrM19_V2.1360 | <i>L. braziliensis</i> | 50  | 1    | 50   |
| LbrM19_V2.1390 | <i>L. braziliensis</i> | 65  | 35   | 99   |
| LbrM19_V2.1390 | <i>L. braziliensis</i> | 532 | 132  | 663  |
| LbrM19_V2.1390 | <i>L. braziliensis</i> | 123 | 721  | 843  |

|                |                        |     |      |      |
|----------------|------------------------|-----|------|------|
| LbrM19_V2.1390 | <i>L. braziliensis</i> | 239 | 960  | 1198 |
| LbrM19_V2.1390 | <i>L. braziliensis</i> | 128 | 1205 | 1332 |
| LbrM19_V2.1390 | <i>L. braziliensis</i> | 325 | 1380 | 1704 |
| LbrM19_V2.1400 | <i>L. braziliensis</i> | 60  | 1    | 60   |
| LbrM19_V2.1400 | <i>L. braziliensis</i> | 502 | 69   | 570  |
| LbrM19_V2.1400 | <i>L. braziliensis</i> | 122 | 586  | 707  |
| LbrM19_V2.1400 | <i>L. braziliensis</i> | 100 | 721  | 820  |
| LbrM19_V2.1400 | <i>L. braziliensis</i> | 81  | 854  | 934  |
| LbrM19_V2.1410 | <i>L. braziliensis</i> | 127 | 53   | 179  |
| LbrM19_V2.1420 | <i>L. braziliensis</i> | 154 | 1    | 154  |
| LbrM19_V2.1420 | <i>L. braziliensis</i> | 156 | 168  | 323  |
| LbrM19_V2.1420 | <i>L. braziliensis</i> | 448 | 337  | 784  |
| LbrM19_V2.1420 | <i>L. braziliensis</i> | 71  | 806  | 876  |
| LbrM19_V2.1420 | <i>L. braziliensis</i> | 85  | 912  | 996  |
| LbrM19_V2.1420 | <i>L. braziliensis</i> | 151 | 1059 | 1209 |
| LbrM19_V2.1420 | <i>L. braziliensis</i> | 101 | 1218 | 1318 |
| LbrM19_V2.1450 | <i>L. braziliensis</i> | 53  | 102  | 154  |
| LbrM19_V2.1450 | <i>L. braziliensis</i> | 156 | 202  | 357  |
| LbrM19_V2.1460 | <i>L. braziliensis</i> | 40  | 39   | 78   |
| LbrM19_V2.1460 | <i>L. braziliensis</i> | 78  | 169  | 246  |
| LbrM19_V2.1460 | <i>L. braziliensis</i> | 44  | 356  | 399  |
| LbrM19_V2.1460 | <i>L. braziliensis</i> | 47  | 636  | 682  |
| LbrM19_V2.1460 | <i>L. braziliensis</i> | 45  | 758  | 802  |
| LbrM19_V2.1460 | <i>L. braziliensis</i> | 90  | 855  | 944  |
| LbrM19_V2.1460 | <i>L. braziliensis</i> | 205 | 1328 | 1532 |
| LbrM19_V2.1460 | <i>L. braziliensis</i> | 94  | 1658 | 1751 |
| LbrM19_V2.1470 | <i>L. braziliensis</i> | 46  | 153  | 198  |
| LbrM19_V2.1470 | <i>L. braziliensis</i> | 40  | 368  | 407  |
| LbrM19_V2.1470 | <i>L. braziliensis</i> | 40  | 368  | 407  |
| LbrM19_V2.1480 | <i>L. braziliensis</i> | 54  | 51   | 104  |
| LbrM19_V2.1490 | <i>L. braziliensis</i> | 141 | 110  | 250  |
| LbrM19_V2.1510 | <i>L. braziliensis</i> | 55  | 117  | 171  |
| LbrM19_V2.1530 | <i>L. braziliensis</i> | 66  | 1    | 66   |
| LbrM19_V2.1530 | <i>L. braziliensis</i> | 42  | 176  | 217  |
| LbrM19_V2.1530 | <i>L. braziliensis</i> | 42  | 176  | 217  |
| LbrM19_V2.1540 | <i>L. braziliensis</i> | 214 | 31   | 244  |
| LbrM19_V2.1540 | <i>L. braziliensis</i> | 140 | 282  | 421  |
| LbrM19_V2.1540 | <i>L. braziliensis</i> | 74  | 457  | 530  |
| LbrM19_V2.1540 | <i>L. braziliensis</i> | 181 | 564  | 744  |
| LbrM19_V2.1540 | <i>L. braziliensis</i> | 50  | 793  | 842  |
| LbrM19_V2.1540 | <i>L. braziliensis</i> | 81  | 855  | 935  |
| LbrM19_V2.1560 | <i>L. braziliensis</i> | 129 | 73   | 201  |
| LbrM19_V2.1560 | <i>L. braziliensis</i> | 54  | 317  | 370  |
| LbrM19_V2.1560 | <i>L. braziliensis</i> | 54  | 317  | 370  |
| LbrM19_V2.1600 | <i>L. braziliensis</i> | 89  | 1    | 89   |
| LbrM19_V2.1600 | <i>L. braziliensis</i> | 54  | 205  | 258  |
| LbrM19_V2.1600 | <i>L. braziliensis</i> | 54  | 205  | 258  |

|                |                        |      |      |      |
|----------------|------------------------|------|------|------|
| LbrM19_V2.1610 | <i>L. braziliensis</i> | 53   | 323  | 375  |
| LbrM19_V2.1640 | <i>L. braziliensis</i> | 288  | 104  | 391  |
| LbrM19_V2.1640 | <i>L. braziliensis</i> | 91   | 618  | 708  |
| LbrM19_V2.1650 | <i>L. braziliensis</i> | 42   | 1    | 42   |
| LbrM19_V2.1650 | <i>L. braziliensis</i> | 45   | 173  | 217  |
| LbrM19_V2.1650 | <i>L. braziliensis</i> | 52   | 467  | 518  |
| LbrM19_V2.1650 | <i>L. braziliensis</i> | 62   | 554  | 615  |
| LbrM19_V2.1680 | <i>L. braziliensis</i> | 73   | 155  | 227  |
| LbrM19_V2.1680 | <i>L. braziliensis</i> | 58   | 704  | 761  |
| LbrM19_V2.1680 | <i>L. braziliensis</i> | 50   | 885  | 934  |
| LbrM19_V2.1690 | <i>L. braziliensis</i> | 96   | 338  | 433  |
| LbrM19_V2.1700 | <i>L. braziliensis</i> | 78   | 169  | 246  |
| LbrM19_V2.1720 | <i>L. braziliensis</i> | 48   | 213  | 260  |
| LbrM19_V2.1740 | <i>L. braziliensis</i> | 91   | 250  | 340  |
| LbrM19_V2.1750 | <i>L. braziliensis</i> | 44   | 195  | 238  |
| LbrM19_V2.1780 | <i>L. braziliensis</i> | 178  | 1    | 178  |
| LbrM19_V2.1780 | <i>L. braziliensis</i> | 51   | 187  | 237  |
| LbrM19_V2.1780 | <i>L. braziliensis</i> | 82   | 271  | 352  |
| LbrM19_V2.1780 | <i>L. braziliensis</i> | 43   | 465  | 507  |
| LbrM19_V2.1780 | <i>L. braziliensis</i> | 46   | 665  | 710  |
| LbrM19_V2.1780 | <i>L. braziliensis</i> | 46   | 773  | 818  |
| LbrM19_V2.1810 | <i>L. braziliensis</i> | 47   | 89   | 135  |
| LbrM19_V2.1830 | <i>L. braziliensis</i> | 60   | 1    | 60   |
| LbrM19_V2.1840 | <i>L. braziliensis</i> | 40   | 197  | 236  |
| LbrM19_V2.1850 | <i>L. braziliensis</i> | 40   | 74   | 113  |
| LbrM19_V2.1850 | <i>L. braziliensis</i> | 68   | 477  | 544  |
| LbrM19_V2.1850 | <i>L. braziliensis</i> | 49   | 550  | 598  |
| LbrM19_V2.1880 | <i>L. braziliensis</i> | 44   | 300  | 343  |
| LbrM19_V2.1910 | <i>L. braziliensis</i> | 635  | 86   | 720  |
| LbrM19_V2.1910 | <i>L. braziliensis</i> | 69   | 778  | 846  |
| LbrM19_V2.1910 | <i>L. braziliensis</i> | 1013 | 876  | 1888 |
| LbrM19_V2.1910 | <i>L. braziliensis</i> | 426  | 1904 | 2329 |
| LbrM19_V2.1910 | <i>L. braziliensis</i> | 277  | 2354 | 2630 |
| LbrM19_V2.1920 | <i>L. braziliensis</i> | 60   | 1    | 60   |
| LbrM19_V2.1920 | <i>L. braziliensis</i> | 64   | 83   | 146  |
| LbrM19_V2.1930 | <i>L. braziliensis</i> | 56   | 1    | 56   |
| LbrM19_V2.1930 | <i>L. braziliensis</i> | 67   | 100  | 166  |
| LbrM19_V2.1930 | <i>L. braziliensis</i> | 67   | 100  | 166  |
| LbrM20_V2.0060 | <i>L. braziliensis</i> | 40   | 124  | 163  |
| LbrM20_V2.0070 | <i>L. braziliensis</i> | 41   | 1    | 41   |
| LbrM20_V2.0070 | <i>L. braziliensis</i> | 52   | 327  | 378  |
| LbrM20_V2.0070 | <i>L. braziliensis</i> | 52   | 327  | 378  |
| LbrM20_V2.0080 | <i>L. braziliensis</i> | 42   | 241  | 282  |
| LbrM20_V2.0110 | <i>L. braziliensis</i> | 46   | 295  | 340  |
| LbrM20_V2.0140 | <i>L. braziliensis</i> | 50   | 238  | 287  |
| LbrM20_V2.0140 | <i>L. braziliensis</i> | 60   | 515  | 574  |
| LbrM20_V2.0140 | <i>L. braziliensis</i> | 43   | 653  | 695  |

|                |                        |     |      |      |
|----------------|------------------------|-----|------|------|
| LbrM20_V2.0140 | <i>L. braziliensis</i> | 41  | 742  | 782  |
| LbrM20_V2.0140 | <i>L. braziliensis</i> | 146 | 905  | 1050 |
| LbrM20_V2.0170 | <i>L. braziliensis</i> | 179 | 1    | 179  |
| LbrM20_V2.0180 | <i>L. braziliensis</i> | 146 | 1    | 146  |
| LbrM20_V2.0180 | <i>L. braziliensis</i> | 118 | 169  | 286  |
| LbrM20_V2.0180 | <i>L. braziliensis</i> | 268 | 354  | 621  |
| LbrM20_V2.0190 | <i>L. braziliensis</i> | 48  | 1    | 48   |
| LbrM20_V2.0190 | <i>L. braziliensis</i> | 79  | 339  | 417  |
| LbrM20_V2.0190 | <i>L. braziliensis</i> | 46  | 483  | 528  |
| LbrM20_V2.0190 | <i>L. braziliensis</i> | 65  | 725  | 789  |
| LbrM20_V2.0210 | <i>L. braziliensis</i> | 47  | 359  | 405  |
| LbrM20_V2.0220 | <i>L. braziliensis</i> | 89  | 119  | 207  |
| LbrM20_V2.0230 | <i>L. braziliensis</i> | 58  | 228  | 285  |
| LbrM20_V2.0240 | <i>L. braziliensis</i> | 222 | 223  | 444  |
| LbrM20_V2.0240 | <i>L. braziliensis</i> | 42  | 547  | 588  |
| LbrM20_V2.0240 | <i>L. braziliensis</i> | 54  | 605  | 658  |
| LbrM20_V2.0250 | <i>L. braziliensis</i> | 734 | 90   | 823  |
| LbrM20_V2.0250 | <i>L. braziliensis</i> | 331 | 992  | 1322 |
| LbrM20_V2.0260 | <i>L. braziliensis</i> | 295 | 1    | 295  |
| LbrM20_V2.0260 | <i>L. braziliensis</i> | 82  | 302  | 383  |
| LbrM20_V2.0280 | <i>L. braziliensis</i> | 70  | 301  | 370  |
| LbrM20_V2.0280 | <i>L. braziliensis</i> | 40  | 547  | 586  |
| LbrM20_V2.0280 | <i>L. braziliensis</i> | 40  | 547  | 586  |
| LbrM20_V2.0290 | <i>L. braziliensis</i> | 159 | 1    | 159  |
| LbrM20_V2.0290 | <i>L. braziliensis</i> | 55  | 231  | 285  |
| LbrM20_V2.0290 | <i>L. braziliensis</i> | 55  | 324  | 378  |
| LbrM20_V2.0290 | <i>L. braziliensis</i> | 46  | 1030 | 1075 |
| LbrM20_V2.0290 | <i>L. braziliensis</i> | 47  | 1487 | 1533 |
| LbrM20_V2.0300 | <i>L. braziliensis</i> | 40  | 333  | 372  |
| LbrM20_V2.0310 | <i>L. braziliensis</i> | 95  | 225  | 319  |
| LbrM20_V2.0310 | <i>L. braziliensis</i> | 67  | 385  | 451  |
| LbrM20_V2.0310 | <i>L. braziliensis</i> | 67  | 582  | 648  |
| LbrM20_V2.0320 | <i>L. braziliensis</i> | 71  | 137  | 207  |
| LbrM20_V2.0330 | <i>L. braziliensis</i> | 59  | 731  | 789  |
| LbrM20_V2.0330 | <i>L. braziliensis</i> | 92  | 1011 | 1102 |
| LbrM20_V2.0330 | <i>L. braziliensis</i> | 82  | 1488 | 1569 |
| LbrM20_V2.0340 | <i>L. braziliensis</i> | 116 | 1    | 116  |
| LbrM20_V2.0340 | <i>L. braziliensis</i> | 49  | 145  | 193  |
| LbrM20_V2.0340 | <i>L. braziliensis</i> | 40  | 420  | 459  |
| LbrM20_V2.0340 | <i>L. braziliensis</i> | 68  | 565  | 632  |
| LbrM20_V2.0350 | <i>L. braziliensis</i> | 78  | 169  | 246  |
| LbrM20_V2.0360 | <i>L. braziliensis</i> | 52  | 311  | 362  |
| LbrM20_V2.0380 | <i>L. braziliensis</i> | 116 | 271  | 386  |
| LbrM20_V2.0390 | <i>L. braziliensis</i> | 127 | 1    | 127  |
| LbrM20_V2.0390 | <i>L. braziliensis</i> | 79  | 317  | 395  |
| LbrM20_V2.0390 | <i>L. braziliensis</i> | 41  | 640  | 680  |
| LbrM20_V2.0400 | <i>L. braziliensis</i> | 48  | 55   | 102  |

|                |                        |     |      |      |
|----------------|------------------------|-----|------|------|
| LbrM20_V2.0410 | <i>L. braziliensis</i> | 40  | 1    | 40   |
| LbrM20_V2.0420 | <i>L. braziliensis</i> | 191 | 1    | 191  |
| LbrM20_V2.0420 | <i>L. braziliensis</i> | 371 | 196  | 566  |
| LbrM20_V2.0420 | <i>L. braziliensis</i> | 380 | 568  | 947  |
| LbrM20_V2.0430 | <i>L. braziliensis</i> | 85  | 1803 | 1887 |
| LbrM20_V2.0430 | <i>L. braziliensis</i> | 76  | 1907 | 1982 |
| LbrM20_V2.0430 | <i>L. braziliensis</i> | 103 | 2029 | 2131 |
| LbrM20_V2.0440 | <i>L. braziliensis</i> | 90  | 496  | 585  |
| LbrM20_V2.0450 | <i>L. braziliensis</i> | 136 | 418  | 553  |
| LbrM20_V2.0450 | <i>L. braziliensis</i> | 118 | 572  | 689  |
| LbrM20_V2.0450 | <i>L. braziliensis</i> | 118 | 572  | 689  |
| LbrM20_V2.0460 | <i>L. braziliensis</i> | 227 | 1    | 227  |
| LbrM20_V2.0460 | <i>L. braziliensis</i> | 122 | 687  | 808  |
| LbrM20_V2.0460 | <i>L. braziliensis</i> | 117 | 843  | 959  |
| LbrM20_V2.0460 | <i>L. braziliensis</i> | 49  | 1024 | 1072 |
| LbrM20_V2.0460 | <i>L. braziliensis</i> | 106 | 1455 | 1560 |
| LbrM20_V2.0460 | <i>L. braziliensis</i> | 169 | 2596 | 2764 |
| LbrM20_V2.0480 | <i>L. braziliensis</i> | 55  | 221  | 275  |
| LbrM20_V2.0490 | <i>L. braziliensis</i> | 41  | 34   | 74   |
| LbrM20_V2.0490 | <i>L. braziliensis</i> | 81  | 77   | 157  |
| LbrM20_V2.0490 | <i>L. braziliensis</i> | 43  | 259  | 301  |
| LbrM20_V2.0490 | <i>L. braziliensis</i> | 60  | 780  | 839  |
| LbrM20_V2.0490 | <i>L. braziliensis</i> | 116 | 1031 | 1146 |
| LbrM20_V2.0490 | <i>L. braziliensis</i> | 67  | 1679 | 1745 |
| LbrM20_V2.0490 | <i>L. braziliensis</i> | 43  | 1747 | 1789 |
| LbrM20_V2.0500 | <i>L. braziliensis</i> | 46  | 786  | 831  |
| LbrM20_V2.0510 | <i>L. braziliensis</i> | 88  | 35   | 122  |
| LbrM20_V2.0520 | <i>L. braziliensis</i> | 63  | 174  | 236  |
| LbrM20_V2.0520 | <i>L. braziliensis</i> | 40  | 424  | 463  |
| LbrM20_V2.0520 | <i>L. braziliensis</i> | 48  | 646  | 693  |
| LbrM20_V2.0520 | <i>L. braziliensis</i> | 47  | 834  | 880  |
| LbrM20_V2.0520 | <i>L. braziliensis</i> | 45  | 906  | 950  |
| LbrM20_V2.0520 | <i>L. braziliensis</i> | 41  | 1049 | 1089 |
| LbrM20_V2.0530 | <i>L. braziliensis</i> | 113 | 1    | 113  |
| LbrM20_V2.0530 | <i>L. braziliensis</i> | 70  | 180  | 249  |
| LbrM20_V2.0530 | <i>L. braziliensis</i> | 247 | 287  | 533  |
| LbrM20_V2.0530 | <i>L. braziliensis</i> | 324 | 535  | 858  |
| LbrM20_V2.0550 | <i>L. braziliensis</i> | 827 | 1    | 827  |
| LbrM20_V2.0550 | <i>L. braziliensis</i> | 256 | 969  | 1224 |
| LbrM20_V2.0550 | <i>L. braziliensis</i> | 315 | 1274 | 1588 |
| LbrM20_V2.0550 | <i>L. braziliensis</i> | 775 | 1603 | 2377 |
| LbrM20_V2.0560 | <i>L. braziliensis</i> | 173 | 48   | 220  |
| LbrM20_V2.0560 | <i>L. braziliensis</i> | 70  | 253  | 322  |
| LbrM20_V2.0560 | <i>L. braziliensis</i> | 105 | 444  | 548  |
| LbrM20_V2.0560 | <i>L. braziliensis</i> | 59  | 563  | 621  |
| LbrM20_V2.0560 | <i>L. braziliensis</i> | 62  | 656  | 717  |
| LbrM20_V2.0570 | <i>L. braziliensis</i> | 46  | 141  | 186  |

|                |                        |     |      |      |
|----------------|------------------------|-----|------|------|
| LbrM20_V2.0570 | <i>L. braziliensis</i> | 60  | 212  | 271  |
| LbrM20_V2.0590 | <i>L. braziliensis</i> | 45  | 1    | 45   |
| LbrM20_V2.0590 | <i>L. braziliensis</i> | 65  | 55   | 119  |
| LbrM20_V2.0590 | <i>L. braziliensis</i> | 77  | 223  | 299  |
| LbrM20_V2.0590 | <i>L. braziliensis</i> | 86  | 307  | 392  |
| LbrM20_V2.0590 | <i>L. braziliensis</i> | 45  | 529  | 573  |
| LbrM20_V2.0590 | <i>L. braziliensis</i> | 357 | 661  | 1017 |
| LbrM20_V2.0600 | <i>L. braziliensis</i> | 60  | 349  | 408  |
| LbrM20_V2.0600 | <i>L. braziliensis</i> | 68  | 641  | 708  |
| LbrM20_V2.0600 | <i>L. braziliensis</i> | 59  | 778  | 836  |
| LbrM20_V2.0600 | <i>L. braziliensis</i> | 47  | 975  | 1021 |
| LbrM20_V2.0600 | <i>L. braziliensis</i> | 86  | 1253 | 1338 |
| LbrM20_V2.0600 | <i>L. braziliensis</i> | 40  | 1718 | 1757 |
| LbrM20_V2.0600 | <i>L. braziliensis</i> | 59  | 1907 | 1965 |
| LbrM20_V2.0610 | <i>L. braziliensis</i> | 51  | 70   | 120  |
| LbrM20_V2.0610 | <i>L. braziliensis</i> | 79  | 377  | 455  |
| LbrM20_V2.0610 | <i>L. braziliensis</i> | 106 | 470  | 575  |
| LbrM20_V2.0610 | <i>L. braziliensis</i> | 117 | 663  | 779  |
| LbrM20_V2.0630 | <i>L. braziliensis</i> | 49  | 91   | 139  |
| LbrM20_V2.0630 | <i>L. braziliensis</i> | 60  | 150  | 209  |
| LbrM20_V2.0640 | <i>L. braziliensis</i> | 49  | 761  | 809  |
| LbrM20_V2.0650 | <i>L. braziliensis</i> | 40  | 213  | 252  |
| LbrM20_V2.0650 | <i>L. braziliensis</i> | 134 | 285  | 418  |
| LbrM20_V2.0670 | <i>L. braziliensis</i> | 60  | 1    | 60   |
| LbrM20_V2.0670 | <i>L. braziliensis</i> | 47  | 341  | 387  |
| LbrM20_V2.0670 | <i>L. braziliensis</i> | 47  | 341  | 387  |
| LbrM20_V2.0690 | <i>L. braziliensis</i> | 63  | 138  | 200  |
| LbrM20_V2.0700 | <i>L. braziliensis</i> | 98  | 69   | 166  |
| LbrM20_V2.0750 | <i>L. braziliensis</i> | 98  | 25   | 122  |
| LbrM20_V2.0770 | <i>L. braziliensis</i> | 101 | 1    | 101  |
| LbrM20_V2.0770 | <i>L. braziliensis</i> | 84  | 142  | 225  |
| LbrM20_V2.0810 | <i>L. braziliensis</i> | 97  | 60   | 156  |
| LbrM20_V2.0840 | <i>L. braziliensis</i> | 66  | 1    | 66   |
| LbrM20_V2.0840 | <i>L. braziliensis</i> | 82  | 164  | 245  |
| LbrM20_V2.0840 | <i>L. braziliensis</i> | 94  | 284  | 377  |
| LbrM20_V2.0840 | <i>L. braziliensis</i> | 144 | 403  | 546  |
| LbrM20_V2.0850 | <i>L. braziliensis</i> | 53  | 1    | 53   |
| LbrM20_V2.0850 | <i>L. braziliensis</i> | 79  | 441  | 519  |
| LbrM20_V2.0850 | <i>L. braziliensis</i> | 58  | 800  | 857  |
| LbrM20_V2.0860 | <i>L. braziliensis</i> | 67  | 1    | 67   |
| LbrM20_V2.0870 | <i>L. braziliensis</i> | 101 | 164  | 264  |
| LbrM20_V2.0890 | <i>L. braziliensis</i> | 99  | 166  | 264  |
| LbrM20_V2.0900 | <i>L. braziliensis</i> | 99  | 166  | 264  |
| LbrM20_V2.0920 | <i>L. braziliensis</i> | 264 | 1    | 264  |
| LbrM20_V2.0920 | <i>L. braziliensis</i> | 72  | 445  | 516  |
| LbrM20_V2.0940 | <i>L. braziliensis</i> | 436 | 1    | 436  |
| LbrM20_V2.0940 | <i>L. braziliensis</i> | 67  | 695  | 761  |

|                |                        |      |      |      |
|----------------|------------------------|------|------|------|
| LbrM20_V2.0940 | <i>L. braziliensis</i> | 60   | 836  | 895  |
| LbrM20_V2.0940 | <i>L. braziliensis</i> | 61   | 925  | 985  |
| LbrM20_V2.0970 | <i>L. braziliensis</i> | 97   | 232  | 328  |
| LbrM20_V2.0970 | <i>L. braziliensis</i> | 153  | 1213 | 1365 |
| LbrM20_V2.0980 | <i>L. braziliensis</i> | 117  | 130  | 246  |
| LbrM20_V2.0980 | <i>L. braziliensis</i> | 53   | 277  | 329  |
| LbrM20_V2.0980 | <i>L. braziliensis</i> | 104  | 369  | 472  |
| LbrM20_V2.0990 | <i>L. braziliensis</i> | 56   | 1    | 56   |
| LbrM20_V2.1000 | <i>L. braziliensis</i> | 64   | 25   | 88   |
| LbrM20_V2.1020 | <i>L. braziliensis</i> | 59   | 175  | 233  |
| LbrM20_V2.1030 | <i>L. braziliensis</i> | 127  | 22   | 148  |
| LbrM20_V2.1030 | <i>L. braziliensis</i> | 71   | 323  | 393  |
| LbrM20_V2.1040 | <i>L. braziliensis</i> | 87   | 274  | 360  |
| LbrM20_V2.1050 | <i>L. braziliensis</i> | 196  | 1    | 196  |
| LbrM20_V2.1100 | <i>L. braziliensis</i> | 117  | 78   | 194  |
| LbrM20_V2.1100 | <i>L. braziliensis</i> | 70   | 706  | 775  |
| LbrM20_V2.1100 | <i>L. braziliensis</i> | 70   | 706  | 775  |
| LbrM20_V2.1110 | <i>L. braziliensis</i> | 40   | 1    | 40   |
| LbrM20_V2.1120 | <i>L. braziliensis</i> | 44   | 60   | 103  |
| LbrM20_V2.1120 | <i>L. braziliensis</i> | 55   | 463  | 517  |
| LbrM20_V2.1120 | <i>L. braziliensis</i> | 52   | 586  | 637  |
| LbrM20_V2.1120 | <i>L. braziliensis</i> | 80   | 923  | 1002 |
| LbrM20_V2.1130 | <i>L. braziliensis</i> | 145  | 26   | 170  |
| LbrM20_V2.1140 | <i>L. braziliensis</i> | 259  | 272  | 530  |
| LbrM20_V2.1150 | <i>L. braziliensis</i> | 88   | 125  | 212  |
| LbrM20_V2.1160 | <i>L. braziliensis</i> | 1150 | 1    | 1150 |
| LbrM20_V2.1160 | <i>L. braziliensis</i> | 150  | 1293 | 1442 |
| LbrM20_V2.1160 | <i>L. braziliensis</i> | 489  | 1560 | 2048 |
| LbrM20_V2.1160 | <i>L. braziliensis</i> | 222  | 2063 | 2284 |
| LbrM20_V2.1160 | <i>L. braziliensis</i> | 81   | 2287 | 2367 |
| LbrM20_V2.1170 | <i>L. braziliensis</i> | 41   | 58   | 98   |
| LbrM20_V2.1180 | <i>L. braziliensis</i> | 58   | 1    | 58   |
| LbrM20_V2.1180 | <i>L. braziliensis</i> | 133  | 108  | 240  |
| LbrM20_V2.1180 | <i>L. braziliensis</i> | 54   | 280  | 333  |
| LbrM20_V2.1190 | <i>L. braziliensis</i> | 81   | 88   | 168  |
| LbrM20_V2.1200 | <i>L. braziliensis</i> | 102  | 349  | 450  |
| LbrM20_V2.1210 | <i>L. braziliensis</i> | 471  | 28   | 498  |
| LbrM20_V2.1220 | <i>L. braziliensis</i> | 71   | 177  | 247  |
| LbrM20_V2.1230 | <i>L. braziliensis</i> | 79   | 52   | 130  |
| LbrM20_V2.1230 | <i>L. braziliensis</i> | 48   | 160  | 207  |
| LbrM20_V2.1230 | <i>L. braziliensis</i> | 97   | 250  | 346  |
| LbrM20_V2.1240 | <i>L. braziliensis</i> | 264  | 172  | 435  |
| LbrM20_V2.1240 | <i>L. braziliensis</i> | 46   | 482  | 527  |
| LbrM20_V2.1240 | <i>L. braziliensis</i> | 53   | 643  | 695  |
| LbrM20_V2.1240 | <i>L. braziliensis</i> | 71   | 808  | 878  |
| LbrM20_V2.1240 | <i>L. braziliensis</i> | 79   | 1266 | 1344 |
| LbrM20_V2.1240 | <i>L. braziliensis</i> | 54   | 1547 | 1600 |



|                |                        |     |      |      |
|----------------|------------------------|-----|------|------|
| LbrM20_V2.1240 | <i>L. braziliensis</i> | 66  | 1663 | 1728 |
| LbrM20_V2.1240 | <i>L. braziliensis</i> | 60  | 1885 | 1944 |
| LbrM20_V2.1260 | <i>L. braziliensis</i> | 47  | 119  | 165  |
| LbrM20_V2.1260 | <i>L. braziliensis</i> | 70  | 486  | 555  |
| LbrM20_V2.1260 | <i>L. braziliensis</i> | 54  | 773  | 826  |
| LbrM20_V2.1260 | <i>L. braziliensis</i> | 62  | 1153 | 1214 |
| LbrM20_V2.1260 | <i>L. braziliensis</i> | 88  | 1291 | 1378 |
| LbrM20_V2.1260 | <i>L. braziliensis</i> | 127 | 1411 | 1537 |
| LbrM20_V2.1290 | <i>L. braziliensis</i> | 409 | 1    | 409  |
| LbrM20_V2.1290 | <i>L. braziliensis</i> | 40  | 652  | 691  |
| LbrM20_V2.1290 | <i>L. braziliensis</i> | 99  | 861  | 959  |
| LbrM20_V2.1300 | <i>L. braziliensis</i> | 42  | 53   | 94   |
| LbrM20_V2.1300 | <i>L. braziliensis</i> | 65  | 97   | 161  |
| LbrM20_V2.1300 | <i>L. braziliensis</i> | 80  | 516  | 595  |
| LbrM20_V2.1300 | <i>L. braziliensis</i> | 67  | 708  | 774  |
| LbrM20_V2.1300 | <i>L. braziliensis</i> | 105 | 787  | 891  |
| LbrM20_V2.1300 | <i>L. braziliensis</i> | 58  | 924  | 981  |
| LbrM20_V2.1310 | <i>L. braziliensis</i> | 65  | 216  | 280  |
| LbrM20_V2.1320 | <i>L. braziliensis</i> | 202 | 515  | 716  |
| LbrM20_V2.1330 | <i>L. braziliensis</i> | 72  | 47   | 118  |
| LbrM20_V2.1330 | <i>L. braziliensis</i> | 169 | 199  | 367  |
| LbrM20_V2.1340 | <i>L. braziliensis</i> | 99  | 1    | 99   |
| LbrM20_V2.1340 | <i>L. braziliensis</i> | 118 | 271  | 388  |
| LbrM20_V2.1340 | <i>L. braziliensis</i> | 67  | 692  | 758  |
| LbrM20_V2.1340 | <i>L. braziliensis</i> | 114 | 817  | 930  |
| LbrM20_V2.1350 | <i>L. braziliensis</i> | 243 | 62   | 304  |
| LbrM20_V2.1350 | <i>L. braziliensis</i> | 104 | 417  | 520  |
| LbrM20_V2.1350 | <i>L. braziliensis</i> | 70  | 560  | 629  |
| LbrM20_V2.1350 | <i>L. braziliensis</i> | 67  | 697  | 763  |
| LbrM20_V2.1360 | <i>L. braziliensis</i> | 49  | 45   | 93   |
| LbrM20_V2.1370 | <i>L. braziliensis</i> | 45  | 73   | 117  |
| LbrM20_V2.1370 | <i>L. braziliensis</i> | 79  | 202  | 280  |
| LbrM20_V2.1370 | <i>L. braziliensis</i> | 234 | 340  | 573  |
| LbrM20_V2.1370 | <i>L. braziliensis</i> | 129 | 983  | 1111 |
| LbrM20_V2.1370 | <i>L. braziliensis</i> | 148 | 1150 | 1297 |
| LbrM20_V2.1380 | <i>L. braziliensis</i> | 52  | 1    | 52   |
| LbrM20_V2.1380 | <i>L. braziliensis</i> | 60  | 90   | 149  |
| LbrM20_V2.1380 | <i>L. braziliensis</i> | 143 | 215  | 357  |
| LbrM20_V2.1390 | <i>L. braziliensis</i> | 103 | 1    | 103  |
| LbrM20_V2.1390 | <i>L. braziliensis</i> | 48  | 165  | 212  |
| LbrM20_V2.1390 | <i>L. braziliensis</i> | 47  | 412  | 458  |
| LbrM20_V2.1390 | <i>L. braziliensis</i> | 44  | 935  | 978  |
| LbrM20_V2.1390 | <i>L. braziliensis</i> | 151 | 1686 | 1836 |
| LbrM20_V2.1390 | <i>L. braziliensis</i> | 49  | 1903 | 1951 |
| LbrM20_V2.1390 | <i>L. braziliensis</i> | 77  | 2189 | 2265 |
| LbrM20_V2.1390 | <i>L. braziliensis</i> | 174 | 2438 | 2611 |
| LbrM20_V2.1400 | <i>L. braziliensis</i> | 67  | 124  | 190  |

|                |                        |     |      |      |
|----------------|------------------------|-----|------|------|
| LbrM20_V2.1410 | <i>L. braziliensis</i> | 129 | 1    | 129  |
| LbrM20_V2.1410 | <i>L. braziliensis</i> | 98  | 157  | 254  |
| LbrM20_V2.1410 | <i>L. braziliensis</i> | 106 | 422  | 527  |
| LbrM20_V2.1420 | <i>L. braziliensis</i> | 57  | 100  | 156  |
| LbrM20_V2.1420 | <i>L. braziliensis</i> | 45  | 202  | 246  |
| LbrM20_V2.1420 | <i>L. braziliensis</i> | 80  | 474  | 553  |
| LbrM20_V2.1420 | <i>L. braziliensis</i> | 67  | 704  | 770  |
| LbrM20_V2.1420 | <i>L. braziliensis</i> | 48  | 1684 | 1731 |
| LbrM20_V2.1420 | <i>L. braziliensis</i> | 58  | 1990 | 2047 |
| LbrM20_V2.1420 | <i>L. braziliensis</i> | 69  | 2288 | 2356 |
| LbrM20_V2.1420 | <i>L. braziliensis</i> | 50  | 2427 | 2476 |
| LbrM20_V2.1420 | <i>L. braziliensis</i> | 51  | 2597 | 2647 |
| LbrM20_V2.1420 | <i>L. braziliensis</i> | 48  | 3344 | 3391 |
| LbrM20_V2.1420 | <i>L. braziliensis</i> | 46  | 4246 | 4291 |
| LbrM20_V2.1420 | <i>L. braziliensis</i> | 83  | 4521 | 4603 |
| LbrM20_V2.1420 | <i>L. braziliensis</i> | 51  | 4679 | 4729 |
| LbrM20_V2.1440 | <i>L. braziliensis</i> | 52  | 1    | 52   |
| LbrM20_V2.1440 | <i>L. braziliensis</i> | 44  | 470  | 513  |
| LbrM20_V2.1450 | <i>L. braziliensis</i> | 120 | 76   | 195  |
| LbrM20_V2.1450 | <i>L. braziliensis</i> | 76  | 498  | 573  |
| LbrM20_V2.1450 | <i>L. braziliensis</i> | 70  | 703  | 772  |
| LbrM20_V2.1460 | <i>L. braziliensis</i> | 40  | 1    | 40   |
| LbrM20_V2.1470 | <i>L. braziliensis</i> | 140 | 1    | 140  |
| LbrM20_V2.1490 | <i>L. braziliensis</i> | 122 | 195  | 316  |
| LbrM20_V2.1490 | <i>L. braziliensis</i> | 207 | 437  | 643  |
| LbrM20_V2.1490 | <i>L. braziliensis</i> | 46  | 656  | 701  |
| LbrM20_V2.1510 | <i>L. braziliensis</i> | 93  | 16   | 108  |
| LbrM20_V2.1520 | <i>L. braziliensis</i> | 47  | 54   | 100  |
| LbrM20_V2.1520 | <i>L. braziliensis</i> | 147 | 479  | 625  |
| LbrM20_V2.1530 | <i>L. braziliensis</i> | 65  | 185  | 249  |
| LbrM20_V2.1530 | <i>L. braziliensis</i> | 50  | 283  | 332  |
| LbrM20_V2.1530 | <i>L. braziliensis</i> | 210 | 364  | 573  |
| LbrM20_V2.1530 | <i>L. braziliensis</i> | 61  | 855  | 915  |
| LbrM20_V2.1530 | <i>L. braziliensis</i> | 47  | 1074 | 1120 |
| LbrM20_V2.1540 | <i>L. braziliensis</i> | 165 | 443  | 607  |
| LbrM20_V2.1540 | <i>L. braziliensis</i> | 96  | 708  | 803  |
| LbrM20_V2.1550 | <i>L. braziliensis</i> | 90  | 88   | 177  |
| LbrM20_V2.1550 | <i>L. braziliensis</i> | 52  | 179  | 230  |
| LbrM20_V2.1550 | <i>L. braziliensis</i> | 52  | 179  | 230  |
| LbrM20_V2.1560 | <i>L. braziliensis</i> | 64  | 1    | 64   |
| LbrM20_V2.1570 | <i>L. braziliensis</i> | 89  | 1    | 89   |
| LbrM20_V2.1570 | <i>L. braziliensis</i> | 114 | 217  | 330  |
| LbrM20_V2.1570 | <i>L. braziliensis</i> | 95  | 398  | 492  |
| LbrM20_V2.1570 | <i>L. braziliensis</i> | 49  | 729  | 777  |
| LbrM20_V2.1570 | <i>L. braziliensis</i> | 50  | 812  | 861  |
| LbrM20_V2.1570 | <i>L. braziliensis</i> | 50  | 885  | 934  |
| LbrM20_V2.1570 | <i>L. braziliensis</i> | 135 | 1048 | 1182 |

|                |                        |     |      |      |
|----------------|------------------------|-----|------|------|
| LbrM20_V2.1570 | <i>L. braziliensis</i> | 44  | 1248 | 1291 |
| LbrM20_V2.1570 | <i>L. braziliensis</i> | 46  | 1617 | 1662 |
| LbrM20_V2.1570 | <i>L. braziliensis</i> | 59  | 1686 | 1744 |
| LbrM20_V2.1570 | <i>L. braziliensis</i> | 54  | 1759 | 1812 |
| LbrM20_V2.1570 | <i>L. braziliensis</i> | 117 | 1819 | 1935 |
| LbrM20_V2.1590 | <i>L. braziliensis</i> | 51  | 95   | 145  |
| LbrM20_V2.1590 | <i>L. braziliensis</i> | 79  | 334  | 412  |
| LbrM20_V2.1590 | <i>L. braziliensis</i> | 233 | 479  | 711  |
| LbrM20_V2.1600 | <i>L. braziliensis</i> | 51  | 24   | 74   |
| LbrM20_V2.1600 | <i>L. braziliensis</i> | 69  | 299  | 367  |
| LbrM20_V2.1600 | <i>L. braziliensis</i> | 41  | 373  | 413  |
| LbrM20_V2.1600 | <i>L. braziliensis</i> | 86  | 415  | 500  |
| LbrM20_V2.1610 | <i>L. braziliensis</i> | 48  | 259  | 306  |
| LbrM20_V2.1650 | <i>L. braziliensis</i> | 42  | 220  | 261  |
| LbrM20_V2.1650 | <i>L. braziliensis</i> | 94  | 296  | 389  |
| LbrM20_V2.1650 | <i>L. braziliensis</i> | 102 | 665  | 766  |
| LbrM20_V2.1650 | <i>L. braziliensis</i> | 124 | 774  | 897  |
| LbrM20_V2.1650 | <i>L. braziliensis</i> | 45  | 1104 | 1148 |
| LbrM20_V2.1650 | <i>L. braziliensis</i> | 99  | 1205 | 1303 |
| LbrM20_V2.1650 | <i>L. braziliensis</i> | 57  | 1355 | 1411 |
| LbrM20_V2.1660 | <i>L. braziliensis</i> | 121 | 58   | 178  |
| LbrM20_V2.1670 | <i>L. braziliensis</i> | 44  | 277  | 320  |
| LbrM20_V2.1670 | <i>L. braziliensis</i> | 42  | 494  | 535  |
| LbrM20_V2.1670 | <i>L. braziliensis</i> | 42  | 494  | 535  |
| LbrM20_V2.1680 | <i>L. braziliensis</i> | 63  | 778  | 840  |
| LbrM20_V2.1690 | <i>L. braziliensis</i> | 58  | 343  | 400  |
| LbrM20_V2.1690 | <i>L. braziliensis</i> | 57  | 694  | 750  |
| LbrM20_V2.1690 | <i>L. braziliensis</i> | 48  | 941  | 988  |
| LbrM20_V2.1700 | <i>L. braziliensis</i> | 54  | 139  | 192  |
| LbrM20_V2.1710 | <i>L. braziliensis</i> | 72  | 1    | 72   |
| LbrM20_V2.1710 | <i>L. braziliensis</i> | 114 | 80   | 193  |
| LbrM20_V2.1710 | <i>L. braziliensis</i> | 58  | 224  | 281  |
| LbrM20_V2.1710 | <i>L. braziliensis</i> | 213 | 323  | 535  |
| LbrM20_V2.1710 | <i>L. braziliensis</i> | 55  | 561  | 615  |
| LbrM20_V2.1710 | <i>L. braziliensis</i> | 204 | 659  | 862  |
| LbrM20_V2.1710 | <i>L. braziliensis</i> | 80  | 888  | 967  |
| LbrM20_V2.1710 | <i>L. braziliensis</i> | 91  | 984  | 1074 |
| LbrM20_V2.1720 | <i>L. braziliensis</i> | 125 | 1    | 125  |
| LbrM20_V2.1720 | <i>L. braziliensis</i> | 123 | 149  | 271  |
| LbrM20_V2.1720 | <i>L. braziliensis</i> | 50  | 702  | 751  |
| LbrM20_V2.1740 | <i>L. braziliensis</i> | 47  | 175  | 221  |
| LbrM20_V2.1740 | <i>L. braziliensis</i> | 59  | 289  | 347  |
| LbrM20_V2.1740 | <i>L. braziliensis</i> | 59  | 289  | 347  |
| LbrM20_V2.1750 | <i>L. braziliensis</i> | 190 | 1    | 190  |
| LbrM20_V2.1750 | <i>L. braziliensis</i> | 64  | 608  | 671  |
| LbrM20_V2.1750 | <i>L. braziliensis</i> | 65  | 712  | 776  |
| LbrM20_V2.1750 | <i>L. braziliensis</i> | 68  | 779  | 846  |

|                |                        |     |      |      |
|----------------|------------------------|-----|------|------|
| LbrM20_V2.1750 | <i>L. braziliensis</i> | 95  | 922  | 1016 |
| LbrM20_V2.1750 | <i>L. braziliensis</i> | 127 | 1053 | 1179 |
| LbrM20_V2.1750 | <i>L. braziliensis</i> | 198 | 1182 | 1379 |
| LbrM20_V2.1750 | <i>L. braziliensis</i> | 147 | 1437 | 1583 |
| LbrM20_V2.1750 | <i>L. braziliensis</i> | 54  | 1693 | 1746 |
| LbrM20_V2.1750 | <i>L. braziliensis</i> | 108 | 1825 | 1932 |
| LbrM20_V2.1760 | <i>L. braziliensis</i> | 55  | 1    | 55   |
| LbrM20_V2.1770 | <i>L. braziliensis</i> | 155 | 390  | 544  |
| LbrM20_V2.1780 | <i>L. braziliensis</i> | 184 | 555  | 738  |
| LbrM20_V2.1790 | <i>L. braziliensis</i> | 64  | 268  | 331  |
| LbrM20_V2.1840 | <i>L. braziliensis</i> | 93  | 75   | 167  |
| LbrM20_V2.1850 | <i>L. braziliensis</i> | 78  | 1    | 78   |
| LbrM20_V2.1860 | <i>L. braziliensis</i> | 428 | 1    | 428  |
| LbrM20_V2.1870 | <i>L. braziliensis</i> | 171 | 13   | 183  |
| LbrM20_V2.1870 | <i>L. braziliensis</i> | 100 | 266  | 365  |
| LbrM20_V2.1880 | <i>L. braziliensis</i> | 160 | 1    | 160  |
| LbrM20_V2.1880 | <i>L. braziliensis</i> | 189 | 175  | 363  |
| LbrM20_V2.1890 | <i>L. braziliensis</i> | 50  | 1    | 50   |
| LbrM20_V2.1890 | <i>L. braziliensis</i> | 85  | 82   | 166  |
| LbrM20_V2.1890 | <i>L. braziliensis</i> | 85  | 82   | 166  |
| LbrM20_V2.1930 | <i>L. braziliensis</i> | 173 | 1    | 173  |
| LbrM20_V2.1930 | <i>L. braziliensis</i> | 127 | 225  | 351  |
| LbrM20_V2.1930 | <i>L. braziliensis</i> | 51  | 413  | 463  |
| LbrM20_V2.1930 | <i>L. braziliensis</i> | 51  | 754  | 804  |
| LbrM20_V2.1940 | <i>L. braziliensis</i> | 83  | 106  | 188  |
| LbrM20_V2.1950 | <i>L. braziliensis</i> | 53  | 429  | 481  |
| LbrM20_V2.1950 | <i>L. braziliensis</i> | 101 | 544  | 644  |
| LbrM20_V2.1950 | <i>L. braziliensis</i> | 91  | 1133 | 1223 |
| LbrM20_V2.1950 | <i>L. braziliensis</i> | 55  | 1660 | 1714 |
| LbrM20_V2.1960 | <i>L. braziliensis</i> | 134 | 28   | 161  |
| LbrM20_V2.1960 | <i>L. braziliensis</i> | 92  | 355  | 446  |
| LbrM20_V2.1980 | <i>L. braziliensis</i> | 48  | 91   | 138  |
| LbrM20_V2.1990 | <i>L. braziliensis</i> | 89  | 148  | 236  |
| LbrM20_V2.2000 | <i>L. braziliensis</i> | 107 | 221  | 327  |
| LbrM20_V2.2010 | <i>L. braziliensis</i> | 187 | 132  | 318  |
| LbrM20_V2.2010 | <i>L. braziliensis</i> | 215 | 322  | 536  |
| LbrM20_V2.2010 | <i>L. braziliensis</i> | 113 | 550  | 662  |
| LbrM20_V2.2010 | <i>L. braziliensis</i> | 58  | 740  | 797  |
| LbrM20_V2.2010 | <i>L. braziliensis</i> | 261 | 854  | 1114 |
| LbrM20_V2.2020 | <i>L. braziliensis</i> | 91  | 1    | 91   |
| LbrM20_V2.2020 | <i>L. braziliensis</i> | 42  | 188  | 229  |
| LbrM20_V2.2020 | <i>L. braziliensis</i> | 42  | 188  | 229  |
| LbrM20_V2.2030 | <i>L. braziliensis</i> | 84  | 209  | 292  |
| LbrM20_V2.2040 | <i>L. braziliensis</i> | 69  | 1    | 69   |
| LbrM20_V2.2040 | <i>L. braziliensis</i> | 60  | 75   | 134  |
| LbrM20_V2.2040 | <i>L. braziliensis</i> | 60  | 75   | 134  |
| LbrM20_V2.2050 | <i>L. braziliensis</i> | 148 | 1    | 148  |

|                |                        |     |      |      |
|----------------|------------------------|-----|------|------|
| LbrM20_V2.2060 | <i>L. braziliensis</i> | 138 | 1    | 138  |
| LbrM20_V2.2060 | <i>L. braziliensis</i> | 46  | 208  | 253  |
| LbrM20_V2.2060 | <i>L. braziliensis</i> | 110 | 377  | 486  |
| LbrM20_V2.2060 | <i>L. braziliensis</i> | 58  | 511  | 568  |
| LbrM20_V2.2060 | <i>L. braziliensis</i> | 42  | 775  | 816  |
| LbrM20_V2.2060 | <i>L. braziliensis</i> | 91  | 898  | 988  |
| LbrM20_V2.2060 | <i>L. braziliensis</i> | 40  | 1458 | 1497 |
| LbrM20_V2.2070 | <i>L. braziliensis</i> | 307 | 56   | 362  |
| LbrM20_V2.2070 | <i>L. braziliensis</i> | 80  | 404  | 483  |
| LbrM20_V2.2070 | <i>L. braziliensis</i> | 117 | 524  | 640  |
| LbrM20_V2.2070 | <i>L. braziliensis</i> | 391 | 668  | 1058 |
| LbrM20_V2.2080 | <i>L. braziliensis</i> | 44  | 1    | 44   |
| LbrM20_V2.2080 | <i>L. braziliensis</i> | 682 | 66   | 747  |
| LbrM20_V2.2080 | <i>L. braziliensis</i> | 91  | 749  | 839  |
| LbrM20_V2.2080 | <i>L. braziliensis</i> | 399 | 937  | 1335 |
| LbrM20_V2.2080 | <i>L. braziliensis</i> | 83  | 1337 | 1419 |
| LbrM20_V2.2090 | <i>L. braziliensis</i> | 370 | 35   | 404  |
| LbrM20_V2.2090 | <i>L. braziliensis</i> | 91  | 406  | 496  |
| LbrM20_V2.2090 | <i>L. braziliensis</i> | 458 | 594  | 1051 |
| LbrM20_V2.2090 | <i>L. braziliensis</i> | 94  | 1078 | 1171 |
| LbrM20_V2.2090 | <i>L. braziliensis</i> | 98  | 1173 | 1270 |
| LbrM20_V2.2100 | <i>L. braziliensis</i> | 70  | 53   | 122  |
| LbrM20_V2.2100 | <i>L. braziliensis</i> | 41  | 165  | 205  |
| LbrM20_V2.2100 | <i>L. braziliensis</i> | 42  | 336  | 377  |
| LbrM20_V2.2100 | <i>L. braziliensis</i> | 89  | 410  | 498  |
| LbrM20_V2.2100 | <i>L. braziliensis</i> | 49  | 527  | 575  |
| LbrM20_V2.2100 | <i>L. braziliensis</i> | 270 | 597  | 866  |
| LbrM20_V2.2100 | <i>L. braziliensis</i> | 199 | 964  | 1162 |
| LbrM20_V2.2100 | <i>L. braziliensis</i> | 357 | 1169 | 1525 |
| LbrM20_V2.2110 | <i>L. braziliensis</i> | 282 | 37   | 318  |
| LbrM20_V2.2110 | <i>L. braziliensis</i> | 47  | 374  | 420  |
| LbrM20_V2.2110 | <i>L. braziliensis</i> | 182 | 511  | 692  |
| LbrM20_V2.2110 | <i>L. braziliensis</i> | 53  | 804  | 856  |
| LbrM20_V2.2120 | <i>L. braziliensis</i> | 61  | 157  | 217  |
| LbrM20_V2.2120 | <i>L. braziliensis</i> | 55  | 225  | 279  |
| LbrM20_V2.2120 | <i>L. braziliensis</i> | 352 | 322  | 673  |
| LbrM20_V2.2120 | <i>L. braziliensis</i> | 47  | 708  | 754  |
| LbrM20_V2.2130 | <i>L. braziliensis</i> | 271 | 133  | 403  |
| LbrM20_V2.2130 | <i>L. braziliensis</i> | 48  | 512  | 559  |
| LbrM20_V2.2140 | <i>L. braziliensis</i> | 80  | 119  | 198  |
| LbrM20_V2.2150 | <i>L. braziliensis</i> | 45  | 373  | 417  |
| LbrM20_V2.2170 | <i>L. braziliensis</i> | 51  | 1    | 51   |
| LbrM20_V2.2170 | <i>L. braziliensis</i> | 52  | 129  | 180  |
| LbrM20_V2.2170 | <i>L. braziliensis</i> | 52  | 129  | 180  |
| LbrM20_V2.2180 | <i>L. braziliensis</i> | 40  | 360  | 399  |
| LbrM20_V2.2190 | <i>L. braziliensis</i> | 51  | 189  | 239  |
| LbrM20_V2.2190 | <i>L. braziliensis</i> | 42  | 284  | 325  |

|                |                        |     |      |      |
|----------------|------------------------|-----|------|------|
| LbrM20_V2.2190 | <i>L. braziliensis</i> | 94  | 329  | 422  |
| LbrM20_V2.2190 | <i>L. braziliensis</i> | 41  | 1470 | 1510 |
| LbrM20_V2.2220 | <i>L. braziliensis</i> | 42  | 25   | 66   |
| LbrM20_V2.2220 | <i>L. braziliensis</i> | 68  | 289  | 356  |
| LbrM20_V2.2220 | <i>L. braziliensis</i> | 56  | 648  | 703  |
| LbrM20_V2.2220 | <i>L. braziliensis</i> | 48  | 755  | 802  |
| LbrM20_V2.2240 | <i>L. braziliensis</i> | 105 | 275  | 379  |
| LbrM20_V2.2240 | <i>L. braziliensis</i> | 54  | 445  | 498  |
| LbrM20_V2.2250 | <i>L. braziliensis</i> | 209 | 24   | 232  |
| LbrM20_V2.2250 | <i>L. braziliensis</i> | 130 | 308  | 437  |
| LbrM20_V2.2250 | <i>L. braziliensis</i> | 97  | 459  | 555  |
| LbrM20_V2.2260 | <i>L. braziliensis</i> | 48  | 1    | 48   |
| LbrM20_V2.2260 | <i>L. braziliensis</i> | 84  | 107  | 190  |
| LbrM20_V2.2270 | <i>L. braziliensis</i> | 262 | 1    | 262  |
| LbrM20_V2.2280 | <i>L. braziliensis</i> | 56  | 370  | 425  |
| LbrM20_V2.2290 | <i>L. braziliensis</i> | 102 | 181  | 282  |
| LbrM20_V2.2300 | <i>L. braziliensis</i> | 50  | 137  | 186  |
| LbrM20_V2.2300 | <i>L. braziliensis</i> | 124 | 302  | 425  |
| LbrM20_V2.2310 | <i>L. braziliensis</i> | 47  | 65   | 111  |
| LbrM20_V2.2310 | <i>L. braziliensis</i> | 43  | 259  | 301  |
| LbrM20_V2.2320 | <i>L. braziliensis</i> | 119 | 35   | 153  |
| LbrM20_V2.2320 | <i>L. braziliensis</i> | 121 | 195  | 315  |
| LbrM20_V2.2330 | <i>L. braziliensis</i> | 64  | 112  | 175  |
| LbrM20_V2.2330 | <i>L. braziliensis</i> | 55  | 269  | 323  |
| LbrM20_V2.2330 | <i>L. braziliensis</i> | 46  | 372  | 417  |
| LbrM20_V2.2330 | <i>L. braziliensis</i> | 40  | 566  | 605  |
| LbrM20_V2.2350 | <i>L. braziliensis</i> | 46  | 356  | 401  |
| LbrM20_V2.2350 | <i>L. braziliensis</i> | 43  | 560  | 602  |
| LbrM20_V2.2350 | <i>L. braziliensis</i> | 43  | 560  | 602  |
| LbrM20_V2.2380 | <i>L. braziliensis</i> | 42  | 316  | 357  |
| LbrM20_V2.2430 | <i>L. braziliensis</i> | 78  | 1    | 78   |
| LbrM20_V2.2430 | <i>L. braziliensis</i> | 76  | 201  | 276  |
| LbrM20_V2.2430 | <i>L. braziliensis</i> | 62  | 328  | 389  |
| LbrM20_V2.2430 | <i>L. braziliensis</i> | 81  | 806  | 886  |
| LbrM20_V2.2440 | <i>L. braziliensis</i> | 92  | 50   | 141  |
| LbrM20_V2.2440 | <i>L. braziliensis</i> | 190 | 162  | 351  |
| LbrM20_V2.2440 | <i>L. braziliensis</i> | 63  | 582  | 644  |
| LbrM20_V2.2460 | <i>L. braziliensis</i> | 46  | 603  | 648  |
| LbrM20_V2.2480 | <i>L. braziliensis</i> | 42  | 1    | 42   |
| LbrM20_V2.2480 | <i>L. braziliensis</i> | 61  | 166  | 226  |
| LbrM20_V2.2480 | <i>L. braziliensis</i> | 61  | 166  | 226  |
| LbrM20_V2.2510 | <i>L. braziliensis</i> | 52  | 58   | 109  |
| LbrM20_V2.2540 | <i>L. braziliensis</i> | 51  | 164  | 214  |
| LbrM20_V2.2550 | <i>L. braziliensis</i> | 101 | 91   | 191  |
| LbrM20_V2.2570 | <i>L. braziliensis</i> | 92  | 110  | 201  |
| LbrM20_V2.2580 | <i>L. braziliensis</i> | 69  | 1    | 69   |
| LbrM20_V2.2580 | <i>L. braziliensis</i> | 218 | 133  | 350  |

|                |                        |     |      |      |
|----------------|------------------------|-----|------|------|
| LbrM20_V2.2580 | <i>L. braziliensis</i> | 95  | 389  | 483  |
| LbrM20_V2.2580 | <i>L. braziliensis</i> | 59  | 516  | 574  |
| LbrM20_V2.2590 | <i>L. braziliensis</i> | 42  | 208  | 249  |
| LbrM20_V2.2600 | <i>L. braziliensis</i> | 125 | 13   | 137  |
| LbrM20_V2.2600 | <i>L. braziliensis</i> | 132 | 145  | 276  |
| LbrM20_V2.2600 | <i>L. braziliensis</i> | 70  | 615  | 684  |
| LbrM20_V2.2600 | <i>L. braziliensis</i> | 45  | 698  | 742  |
| LbrM20_V2.2600 | <i>L. braziliensis</i> | 156 | 752  | 907  |
| LbrM20_V2.2610 | <i>L. braziliensis</i> | 79  | 1    | 79   |
| LbrM20_V2.2610 | <i>L. braziliensis</i> | 60  | 86   | 145  |
| LbrM20_V2.2620 | <i>L. braziliensis</i> | 81  | 194  | 274  |
| LbrM20_V2.2620 | <i>L. braziliensis</i> | 43  | 383  | 425  |
| LbrM20_V2.2640 | <i>L. braziliensis</i> | 67  | 58   | 124  |
| LbrM20_V2.2650 | <i>L. braziliensis</i> | 87  | 22   | 108  |
| LbrM20_V2.2650 | <i>L. braziliensis</i> | 113 | 182  | 294  |
| LbrM20_V2.2660 | <i>L. braziliensis</i> | 118 | 618  | 735  |
| LbrM20_V2.2670 | <i>L. braziliensis</i> | 44  | 15   | 58   |
| LbrM20_V2.2670 | <i>L. braziliensis</i> | 142 | 78   | 219  |
| LbrM20_V2.2690 | <i>L. braziliensis</i> | 45  | 47   | 91   |
| LbrM20_V2.2720 | <i>L. braziliensis</i> | 50  | 1    | 50   |
| LbrM20_V2.2720 | <i>L. braziliensis</i> | 71  | 182  | 252  |
| LbrM20_V2.2730 | <i>L. braziliensis</i> | 84  | 1    | 84   |
| LbrM20_V2.2740 | <i>L. braziliensis</i> | 70  | 1    | 70   |
| LbrM20_V2.2740 | <i>L. braziliensis</i> | 150 | 118  | 267  |
| LbrM20_V2.2740 | <i>L. braziliensis</i> | 43  | 545  | 587  |
| LbrM20_V2.2750 | <i>L. braziliensis</i> | 134 | 83   | 216  |
| LbrM20_V2.2750 | <i>L. braziliensis</i> | 165 | 270  | 434  |
| LbrM20_V2.2760 | <i>L. braziliensis</i> | 181 | 40   | 220  |
| LbrM20_V2.2760 | <i>L. braziliensis</i> | 145 | 253  | 397  |
| LbrM20_V2.2770 | <i>L. braziliensis</i> | 77  | 33   | 109  |
| LbrM20_V2.2770 | <i>L. braziliensis</i> | 51  | 438  | 488  |
| LbrM20_V2.2770 | <i>L. braziliensis</i> | 51  | 438  | 488  |
| LbrM20_V2.2780 | <i>L. braziliensis</i> | 52  | 169  | 220  |
| LbrM20_V2.2780 | <i>L. braziliensis</i> | 50  | 814  | 863  |
| LbrM20_V2.2780 | <i>L. braziliensis</i> | 150 | 876  | 1025 |
| LbrM20_V2.2810 | <i>L. braziliensis</i> | 41  | 48   | 88   |
| LbrM20_V2.2810 | <i>L. braziliensis</i> | 121 | 396  | 516  |
| LbrM20_V2.2810 | <i>L. braziliensis</i> | 91  | 665  | 755  |
| LbrM20_V2.2810 | <i>L. braziliensis</i> | 73  | 1291 | 1363 |
| LbrM20_V2.2810 | <i>L. braziliensis</i> | 57  | 1748 | 1804 |
| LbrM20_V2.2840 | <i>L. braziliensis</i> | 89  | 241  | 329  |
| LbrM20_V2.2840 | <i>L. braziliensis</i> | 48  | 332  | 379  |
| LbrM20_V2.2840 | <i>L. braziliensis</i> | 40  | 495  | 534  |
| LbrM20_V2.2840 | <i>L. braziliensis</i> | 104 | 537  | 640  |
| LbrM20_V2.2850 | <i>L. braziliensis</i> | 59  | 125  | 183  |
| LbrM20_V2.2860 | <i>L. braziliensis</i> | 51  | 95   | 145  |
| LbrM20_V2.2860 | <i>L. braziliensis</i> | 101 | 238  | 338  |

|                |                        |     |      |      |
|----------------|------------------------|-----|------|------|
| LbrM20_V2.2860 | <i>L. braziliensis</i> | 113 | 367  | 479  |
| LbrM20_V2.2880 | <i>L. braziliensis</i> | 42  | 391  | 432  |
| LbrM20_V2.2890 | <i>L. braziliensis</i> | 40  | 173  | 212  |
| LbrM20_V2.2930 | <i>L. braziliensis</i> | 46  | 9    | 54   |
| LbrM20_V2.2930 | <i>L. braziliensis</i> | 129 | 310  | 438  |
| LbrM20_V2.2930 | <i>L. braziliensis</i> | 85  | 464  | 548  |
| LbrM20_V2.2940 | <i>L. braziliensis</i> | 121 | 377  | 497  |
| LbrM20_V2.2980 | <i>L. braziliensis</i> | 50  | 117  | 166  |
| LbrM20_V2.2980 | <i>L. braziliensis</i> | 88  | 249  | 336  |
| LbrM20_V2.2990 | <i>L. braziliensis</i> | 68  | 235  | 302  |
| LbrM20_V2.3010 | <i>L. braziliensis</i> | 41  | 547  | 587  |
| LbrM20_V2.3020 | <i>L. braziliensis</i> | 42  | 137  | 178  |
| LbrM20_V2.3020 | <i>L. braziliensis</i> | 170 | 468  | 637  |
| LbrM20_V2.3030 | <i>L. braziliensis</i> | 71  | 46   | 116  |
| LbrM20_V2.3030 | <i>L. braziliensis</i> | 64  | 296  | 359  |
| LbrM20_V2.3030 | <i>L. braziliensis</i> | 62  | 376  | 437  |
| LbrM20_V2.3030 | <i>L. braziliensis</i> | 141 | 518  | 658  |
| LbrM20_V2.3030 | <i>L. braziliensis</i> | 285 | 817  | 1101 |
| LbrM20_V2.3030 | <i>L. braziliensis</i> | 56  | 1126 | 1181 |
| LbrM20_V2.3070 | <i>L. braziliensis</i> | 63  | 32   | 94   |
| LbrM20_V2.3110 | <i>L. braziliensis</i> | 45  | 1359 | 1403 |
| LbrM20_V2.3110 | <i>L. braziliensis</i> | 45  | 1887 | 1931 |
| LbrM20_V2.3110 | <i>L. braziliensis</i> | 45  | 1887 | 1931 |
| LbrM20_V2.3130 | <i>L. braziliensis</i> | 132 | 101  | 232  |
| LbrM20_V2.3130 | <i>L. braziliensis</i> | 84  | 242  | 325  |
| LbrM20_V2.3140 | <i>L. braziliensis</i> | 130 | 195  | 324  |
| LbrM20_V2.3150 | <i>L. braziliensis</i> | 658 | 112  | 769  |
| LbrM20_V2.3150 | <i>L. braziliensis</i> | 226 | 824  | 1049 |
| LbrM20_V2.3160 | <i>L. braziliensis</i> | 65  | 67   | 131  |
| LbrM20_V2.3170 | <i>L. braziliensis</i> | 42  | 123  | 164  |
| LbrM20_V2.3170 | <i>L. braziliensis</i> | 62  | 259  | 320  |
| LbrM20_V2.3170 | <i>L. braziliensis</i> | 62  | 259  | 320  |
| LbrM20_V2.3220 | <i>L. braziliensis</i> | 84  | 150  | 233  |
| LbrM20_V2.3280 | <i>L. braziliensis</i> | 67  | 45   | 111  |
| LbrM20_V2.3280 | <i>L. braziliensis</i> | 41  | 593  | 633  |
| LbrM20_V2.3280 | <i>L. braziliensis</i> | 46  | 858  | 903  |
| LbrM20_V2.3280 | <i>L. braziliensis</i> | 68  | 1309 | 1376 |
| LbrM20_V2.3290 | <i>L. braziliensis</i> | 54  | 180  | 233  |
| LbrM20_V2.3300 | <i>L. braziliensis</i> | 120 | 51   | 170  |
| LbrM20_V2.3320 | <i>L. braziliensis</i> | 44  | 1    | 44   |
| LbrM20_V2.3340 | <i>L. braziliensis</i> | 43  | 101  | 143  |
| LbrM20_V2.3340 | <i>L. braziliensis</i> | 142 | 188  | 329  |
| LbrM20_V2.3340 | <i>L. braziliensis</i> | 166 | 335  | 500  |
| LbrM20_V2.3350 | <i>L. braziliensis</i> | 60  | 22   | 81   |
| LbrM20_V2.3350 | <i>L. braziliensis</i> | 73  | 92   | 164  |
| LbrM20_V2.3350 | <i>L. braziliensis</i> | 189 | 323  | 511  |
| LbrM20_V2.3370 | <i>L. braziliensis</i> | 51  | 1    | 51   |



|                |                        |     |      |      |
|----------------|------------------------|-----|------|------|
| LbrM20_V2.3370 | <i>L. braziliensis</i> | 52  | 148  | 199  |
| LbrM20_V2.3370 | <i>L. braziliensis</i> | 52  | 148  | 199  |
| LbrM20_V2.3380 | <i>L. braziliensis</i> | 42  | 17   | 58   |
| LbrM20_V2.3390 | <i>L. braziliensis</i> | 72  | 642  | 713  |
| LbrM20_V2.3390 | <i>L. braziliensis</i> | 58  | 942  | 999  |
| LbrM20_V2.3390 | <i>L. braziliensis</i> | 42  | 1059 | 1100 |
| LbrM20_V2.3410 | <i>L. braziliensis</i> | 58  | 140  | 197  |
| LbrM20_V2.3430 | <i>L. braziliensis</i> | 72  | 1    | 72   |
| LbrM20_V2.3430 | <i>L. braziliensis</i> | 51  | 106  | 156  |
| LbrM20_V2.3440 | <i>L. braziliensis</i> | 113 | 1    | 113  |
| LbrM20_V2.3440 | <i>L. braziliensis</i> | 60  | 122  | 181  |
| LbrM20_V2.3440 | <i>L. braziliensis</i> | 60  | 122  | 181  |
| LbrM20_V2.3480 | <i>L. braziliensis</i> | 144 | 1    | 144  |
| LbrM20_V2.3480 | <i>L. braziliensis</i> | 64  | 547  | 610  |
| LbrM20_V2.3480 | <i>L. braziliensis</i> | 64  | 547  | 610  |
| LbrM20_V2.3490 | <i>L. braziliensis</i> | 50  | 2589 | 2638 |
| LbrM20_V2.3490 | <i>L. braziliensis</i> | 85  | 3192 | 3276 |
| LbrM20_V2.3490 | <i>L. braziliensis</i> | 69  | 3399 | 3467 |
| LbrM20_V2.3490 | <i>L. braziliensis</i> | 85  | 3716 | 3800 |
| LbrM20_V2.3510 | <i>L. braziliensis</i> | 67  | 115  | 181  |
| LbrM20_V2.3530 | <i>L. braziliensis</i> | 42  | 1    | 42   |
| LbrM20_V2.3530 | <i>L. braziliensis</i> | 42  | 83   | 124  |
| LbrM20_V2.3530 | <i>L. braziliensis</i> | 92  | 126  | 217  |
| LbrM20_V2.3550 | <i>L. braziliensis</i> | 50  | 1    | 50   |
| LbrM20_V2.3550 | <i>L. braziliensis</i> | 49  | 747  | 795  |
| LbrM20_V2.3550 | <i>L. braziliensis</i> | 139 | 2433 | 2571 |
| LbrM20_V2.3560 | <i>L. braziliensis</i> | 178 | 1    | 178  |
| LbrM20_V2.3590 | <i>L. braziliensis</i> | 52  | 227  | 278  |
| LbrM20_V2.3590 | <i>L. braziliensis</i> | 45  | 347  | 391  |
| LbrM20_V2.3590 | <i>L. braziliensis</i> | 59  | 603  | 661  |
| LbrM20_V2.3600 | <i>L. braziliensis</i> | 87  | 634  | 720  |
| LbrM20_V2.3630 | <i>L. braziliensis</i> | 46  | 126  | 171  |
| LbrM20_V2.3650 | <i>L. braziliensis</i> | 80  | 1    | 80   |
| LbrM20_V2.3670 | <i>L. braziliensis</i> | 49  | 42   | 90   |
| LbrM20_V2.3680 | <i>L. braziliensis</i> | 41  | 1    | 41   |
| LbrM20_V2.3680 | <i>L. braziliensis</i> | 50  | 69   | 118  |
| LbrM20_V2.3680 | <i>L. braziliensis</i> | 51  | 127  | 177  |
| LbrM20_V2.3680 | <i>L. braziliensis</i> | 75  | 600  | 674  |
| LbrM20_V2.3700 | <i>L. braziliensis</i> | 56  | 1    | 56   |
| LbrM20_V2.3710 | <i>L. braziliensis</i> | 44  | 60   | 103  |
| LbrM20_V2.3720 | <i>L. braziliensis</i> | 205 | 56   | 260  |
| LbrM20_V2.3730 | <i>L. braziliensis</i> | 48  | 20   | 67   |
| LbrM20_V2.3740 | <i>L. braziliensis</i> | 55  | 124  | 178  |
| LbrM20_V2.3740 | <i>L. braziliensis</i> | 52  | 432  | 483  |
| LbrM20_V2.3740 | <i>L. braziliensis</i> | 67  | 730  | 796  |
| LbrM20_V2.3740 | <i>L. braziliensis</i> | 43  | 1503 | 1545 |
| LbrM20_V2.3770 | <i>L. braziliensis</i> | 108 | 1    | 108  |

|                |                        |     |      |      |
|----------------|------------------------|-----|------|------|
| LbrM20_V2.3770 | <i>L. braziliensis</i> | 192 | 131  | 322  |
| LbrM20_V2.3770 | <i>L. braziliensis</i> | 101 | 369  | 469  |
| LbrM20_V2.3780 | <i>L. braziliensis</i> | 47  | 420  | 466  |
| LbrM20_V2.3790 | <i>L. braziliensis</i> | 42  | 1054 | 1095 |
| LbrM20_V2.3790 | <i>L. braziliensis</i> | 70  | 2837 | 2906 |
| LbrM20_V2.3790 | <i>L. braziliensis</i> | 73  | 3046 | 3118 |
| LbrM20_V2.3790 | <i>L. braziliensis</i> | 67  | 3349 | 3415 |
| LbrM20_V2.3800 | <i>L. braziliensis</i> | 61  | 1    | 61   |
| LbrM20_V2.3800 | <i>L. braziliensis</i> | 75  | 75   | 149  |
| LbrM20_V2.3810 | <i>L. braziliensis</i> | 127 | 1    | 127  |
| LbrM20_V2.3840 | <i>L. braziliensis</i> | 288 | 84   | 371  |
| LbrM20_V2.3840 | <i>L. braziliensis</i> | 83  | 416  | 498  |
| LbrM20_V2.3870 | <i>L. braziliensis</i> | 47  | 107  | 153  |
| LbrM20_V2.3870 | <i>L. braziliensis</i> | 91  | 167  | 257  |
| LbrM20_V2.3880 | <i>L. braziliensis</i> | 89  | 17   | 105  |
| LbrM20_V2.3890 | <i>L. braziliensis</i> | 89  | 21   | 109  |
| LbrM20_V2.3890 | <i>L. braziliensis</i> | 187 | 453  | 639  |
| LbrM20_V2.3890 | <i>L. braziliensis</i> | 136 | 661  | 796  |
| LbrM20_V2.3900 | <i>L. braziliensis</i> | 51  | 1    | 51   |
| LbrM20_V2.3910 | <i>L. braziliensis</i> | 71  | 1    | 71   |
| LbrM20_V2.3910 | <i>L. braziliensis</i> | 104 | 122  | 225  |
| LbrM20_V2.3930 | <i>L. braziliensis</i> | 52  | 814  | 865  |
| LbrM20_V2.3930 | <i>L. braziliensis</i> | 46  | 1085 | 1130 |
| LbrM20_V2.3990 | <i>L. braziliensis</i> | 50  | 441  | 490  |
| LbrM20_V2.3990 | <i>L. braziliensis</i> | 75  | 1349 | 1423 |
| LbrM20_V2.3990 | <i>L. braziliensis</i> | 44  | 2319 | 2362 |
| LbrM20_V2.4000 | <i>L. braziliensis</i> | 108 | 1    | 108  |
| LbrM20_V2.4010 | <i>L. braziliensis</i> | 79  | 1    | 79   |
| LbrM20_V2.4020 | <i>L. braziliensis</i> | 137 | 191  | 327  |
| LbrM20_V2.4060 | <i>L. braziliensis</i> | 117 | 1    | 117  |
| LbrM20_V2.4100 | <i>L. braziliensis</i> | 59  | 352  | 410  |
| LbrM20_V2.4120 | <i>L. braziliensis</i> | 74  | 265  | 338  |
| LbrM20_V2.4130 | <i>L. braziliensis</i> | 85  | 1    | 85   |
| LbrM20_V2.4150 | <i>L. braziliensis</i> | 120 | 27   | 146  |
| LbrM20_V2.4150 | <i>L. braziliensis</i> | 175 | 161  | 335  |
| LbrM20_V2.4150 | <i>L. braziliensis</i> | 51  | 584  | 634  |
| LbrM20_V2.4150 | <i>L. braziliensis</i> | 76  | 863  | 938  |
| LbrM20_V2.4170 | <i>L. braziliensis</i> | 80  | 256  | 335  |
| LbrM20_V2.4180 | <i>L. braziliensis</i> | 45  | 38   | 82   |
| LbrM20_V2.4180 | <i>L. braziliensis</i> | 43  | 658  | 700  |
| LbrM20_V2.4180 | <i>L. braziliensis</i> | 43  | 658  | 700  |
| LbrM20_V2.4190 | <i>L. braziliensis</i> | 87  | 360  | 446  |
| LbrM20_V2.4210 | <i>L. braziliensis</i> | 55  | 390  | 444  |
| LbrM20_V2.4220 | <i>L. braziliensis</i> | 150 | 184  | 333  |
| LbrM20_V2.4220 | <i>L. braziliensis</i> | 189 | 411  | 599  |
| LbrM20_V2.4220 | <i>L. braziliensis</i> | 42  | 689  | 730  |
| LbrM20_V2.4220 | <i>L. braziliensis</i> | 41  | 767  | 807  |

|                |                        |     |      |      |
|----------------|------------------------|-----|------|------|
| LbrM20_V2.4220 | <i>L. braziliensis</i> | 92  | 1098 | 1189 |
| LbrM20_V2.4230 | <i>L. braziliensis</i> | 48  | 706  | 753  |
| LbrM20_V2.4240 | <i>L. braziliensis</i> | 138 | 542  | 679  |
| LbrM20_V2.4260 | <i>L. braziliensis</i> | 217 | 55   | 271  |
| LbrM20_V2.4270 | <i>L. braziliensis</i> | 50  | 50   | 99   |
| LbrM20_V2.4270 | <i>L. braziliensis</i> | 59  | 304  | 362  |
| LbrM20_V2.4270 | <i>L. braziliensis</i> | 47  | 398  | 444  |
| LbrM20_V2.4270 | <i>L. braziliensis</i> | 48  | 501  | 548  |
| LbrM20_V2.4280 | <i>L. braziliensis</i> | 95  | 58   | 152  |
| LbrM20_V2.4280 | <i>L. braziliensis</i> | 771 | 188  | 958  |
| LbrM20_V2.4290 | <i>L. braziliensis</i> | 228 | 25   | 252  |
| LbrM20_V2.4330 | <i>L. braziliensis</i> | 48  | 350  | 397  |
| LbrM20_V2.4370 | <i>L. braziliensis</i> | 65  | 42   | 106  |
| LbrM20_V2.4370 | <i>L. braziliensis</i> | 63  | 156  | 218  |
| LbrM20_V2.4370 | <i>L. braziliensis</i> | 171 | 272  | 442  |
| LbrM20_V2.4370 | <i>L. braziliensis</i> | 42  | 702  | 743  |
| LbrM20_V2.4380 | <i>L. braziliensis</i> | 177 | 1    | 177  |
| LbrM20_V2.4380 | <i>L. braziliensis</i> | 44  | 208  | 251  |
| LbrM20_V2.4390 | <i>L. braziliensis</i> | 64  | 118  | 181  |
| LbrM20_V2.4390 | <i>L. braziliensis</i> | 43  | 367  | 409  |
| LbrM20_V2.4390 | <i>L. braziliensis</i> | 43  | 367  | 409  |
| LbrM20_V2.4430 | <i>L. braziliensis</i> | 67  | 1    | 67   |
| LbrM20_V2.4450 | <i>L. braziliensis</i> | 72  | 1    | 72   |
| LbrM20_V2.4460 | <i>L. braziliensis</i> | 41  | 872  | 912  |
| LbrM20_V2.4460 | <i>L. braziliensis</i> | 41  | 1330 | 1370 |
| LbrM20_V2.4460 | <i>L. braziliensis</i> | 72  | 1491 | 1562 |
| LbrM20_V2.4460 | <i>L. braziliensis</i> | 49  | 2270 | 2318 |
| LbrM20_V2.4460 | <i>L. braziliensis</i> | 48  | 2383 | 2430 |
| LbrM20_V2.4460 | <i>L. braziliensis</i> | 53  | 2469 | 2521 |
| LbrM20_V2.4460 | <i>L. braziliensis</i> | 63  | 2842 | 2904 |
| LbrM20_V2.4460 | <i>L. braziliensis</i> | 94  | 3213 | 3306 |
| LbrM20_V2.4460 | <i>L. braziliensis</i> | 550 | 3413 | 3962 |
| LbrM20_V2.4460 | <i>L. braziliensis</i> | 40  | 4095 | 4134 |
| LbrM20_V2.4460 | <i>L. braziliensis</i> | 47  | 4178 | 4224 |
| LbrM20_V2.4480 | <i>L. braziliensis</i> | 55  | 101  | 155  |
| LbrM20_V2.4480 | <i>L. braziliensis</i> | 40  | 222  | 261  |
| LbrM20_V2.4480 | <i>L. braziliensis</i> | 40  | 222  | 261  |
| LbrM20_V2.4490 | <i>L. braziliensis</i> | 220 | 92   | 311  |
| LbrM20_V2.4500 | <i>L. braziliensis</i> | 53  | 1    | 53   |
| LbrM20_V2.4510 | <i>L. braziliensis</i> | 60  | 396  | 455  |
| LbrM20_V2.4510 | <i>L. braziliensis</i> | 50  | 706  | 755  |
| LbrM20_V2.4510 | <i>L. braziliensis</i> | 50  | 706  | 755  |
| LbrM20_V2.4540 | <i>L. braziliensis</i> | 40  | 134  | 173  |
| LbrM20_V2.4540 | <i>L. braziliensis</i> | 79  | 213  | 291  |
| LbrM20_V2.4540 | <i>L. braziliensis</i> | 169 | 447  | 615  |
| LbrM20_V2.4550 | <i>L. braziliensis</i> | 200 | 1    | 200  |
| LbrM20_V2.4560 | <i>L. braziliensis</i> | 73  | 170  | 242  |

|                |                        |     |      |      |
|----------------|------------------------|-----|------|------|
| LbrM20_V2.4560 | <i>L. braziliensis</i> | 86  | 305  | 390  |
| LbrM20_V2.4560 | <i>L. braziliensis</i> | 86  | 305  | 390  |
| LbrM20_V2.4570 | <i>L. braziliensis</i> | 43  | 73   | 115  |
| LbrM20_V2.4570 | <i>L. braziliensis</i> | 41  | 192  | 232  |
| LbrM20_V2.4570 | <i>L. braziliensis</i> | 41  | 192  | 232  |
| LbrM20_V2.4580 | <i>L. braziliensis</i> | 115 | 1    | 115  |
| LbrM20_V2.4580 | <i>L. braziliensis</i> | 114 | 392  | 505  |
| LbrM20_V2.4590 | <i>L. braziliensis</i> | 51  | 68   | 118  |
| LbrM20_V2.4590 | <i>L. braziliensis</i> | 122 | 152  | 273  |
| LbrM20_V2.4590 | <i>L. braziliensis</i> | 285 | 299  | 583  |
| LbrM20_V2.4600 | <i>L. braziliensis</i> | 40  | 264  | 303  |
| LbrM20_V2.4610 | <i>L. braziliensis</i> | 50  | 299  | 348  |
| LbrM20_V2.4610 | <i>L. braziliensis</i> | 63  | 414  | 476  |
| LbrM20_V2.4610 | <i>L. braziliensis</i> | 63  | 414  | 476  |
| LbrM20_V2.4620 | <i>L. braziliensis</i> | 55  | 473  | 527  |
| LbrM20_V2.4620 | <i>L. braziliensis</i> | 156 | 597  | 752  |
| LbrM20_V2.4620 | <i>L. braziliensis</i> | 56  | 1360 | 1415 |
| LbrM20_V2.4630 | <i>L. braziliensis</i> | 44  | 218  | 261  |
| LbrM20_V2.4640 | <i>L. braziliensis</i> | 78  | 212  | 289  |
| LbrM20_V2.4650 | <i>L. braziliensis</i> | 62  | 179  | 240  |
| LbrM20_V2.4650 | <i>L. braziliensis</i> | 60  | 313  | 372  |
| LbrM20_V2.4650 | <i>L. braziliensis</i> | 60  | 442  | 501  |
| LbrM20_V2.4650 | <i>L. braziliensis</i> | 68  | 506  | 573  |
| LbrM20_V2.4660 | <i>L. braziliensis</i> | 427 | 1    | 427  |
| LbrM20_V2.4660 | <i>L. braziliensis</i> | 231 | 430  | 660  |
| LbrM20_V2.4660 | <i>L. braziliensis</i> | 671 | 672  | 1342 |
| LbrM20_V2.4670 | <i>L. braziliensis</i> | 137 | 1    | 137  |
| LbrM20_V2.4680 | <i>L. braziliensis</i> | 43  | 24   | 66   |
| LbrM20_V2.4680 | <i>L. braziliensis</i> | 89  | 325  | 413  |
| LbrM20_V2.4680 | <i>L. braziliensis</i> | 89  | 325  | 413  |
| LbrM20_V2.4740 | <i>L. braziliensis</i> | 46  | 232  | 277  |
| LbrM20_V2.4750 | <i>L. braziliensis</i> | 58  | 329  | 386  |
| LbrM20_V2.4760 | <i>L. braziliensis</i> | 365 | 103  | 467  |
| LbrM20_V2.4760 | <i>L. braziliensis</i> | 108 | 470  | 577  |
| LbrM20_V2.4760 | <i>L. braziliensis</i> | 56  | 685  | 740  |
| LbrM20_V2.4780 | <i>L. braziliensis</i> | 45  | 1    | 45   |
| LbrM20_V2.4780 | <i>L. braziliensis</i> | 106 | 127  | 232  |
| LbrM20_V2.4780 | <i>L. braziliensis</i> | 106 | 127  | 232  |
| LbrM20_V2.4790 | <i>L. braziliensis</i> | 41  | 37   | 77   |
| LbrM20_V2.4790 | <i>L. braziliensis</i> | 67  | 132  | 198  |
| LbrM20_V2.4790 | <i>L. braziliensis</i> | 49  | 240  | 288  |
| LbrM20_V2.4790 | <i>L. braziliensis</i> | 71  | 441  | 511  |
| LbrM20_V2.4810 | <i>L. braziliensis</i> | 53  | 122  | 174  |
| LbrM20_V2.4810 | <i>L. braziliensis</i> | 126 | 408  | 533  |
| LbrM20_V2.4810 | <i>L. braziliensis</i> | 126 | 408  | 533  |
| LbrM20_V2.4820 | <i>L. braziliensis</i> | 149 | 1    | 149  |
| LbrM20_V2.4820 | <i>L. braziliensis</i> | 69  | 367  | 435  |

|                |                        |     |      |      |
|----------------|------------------------|-----|------|------|
| LbrM20_V2.4830 | <i>L. braziliensis</i> | 67  | 62   | 128  |
| LbrM20_V2.4830 | <i>L. braziliensis</i> | 211 | 175  | 385  |
| LbrM20_V2.4830 | <i>L. braziliensis</i> | 109 | 498  | 606  |
| LbrM20_V2.4850 | <i>L. braziliensis</i> | 88  | 1    | 88   |
| LbrM20_V2.4850 | <i>L. braziliensis</i> | 87  | 189  | 275  |
| LbrM20_V2.4850 | <i>L. braziliensis</i> | 75  | 338  | 412  |
| LbrM20_V2.4850 | <i>L. braziliensis</i> | 182 | 439  | 620  |
| LbrM20_V2.4850 | <i>L. braziliensis</i> | 131 | 670  | 800  |
| LbrM20_V2.4850 | <i>L. braziliensis</i> | 53  | 821  | 873  |
| LbrM20_V2.4850 | <i>L. braziliensis</i> | 234 | 878  | 1111 |
| LbrM20_V2.4850 | <i>L. braziliensis</i> | 147 | 1122 | 1268 |
| LbrM20_V2.4850 | <i>L. braziliensis</i> | 48  | 1434 | 1481 |
| LbrM20_V2.4850 | <i>L. braziliensis</i> | 53  | 1490 | 1542 |
| LbrM20_V2.4860 | <i>L. braziliensis</i> | 195 | 19   | 213  |
| LbrM20_V2.4860 | <i>L. braziliensis</i> | 63  | 225  | 287  |
| LbrM20_V2.4860 | <i>L. braziliensis</i> | 141 | 311  | 451  |
| LbrM20_V2.4860 | <i>L. braziliensis</i> | 280 | 589  | 868  |
| LbrM20_V2.4860 | <i>L. braziliensis</i> | 81  | 886  | 966  |
| LbrM20_V2.4860 | <i>L. braziliensis</i> | 56  | 1002 | 1057 |
| LbrM20_V2.4860 | <i>L. braziliensis</i> | 62  | 1115 | 1176 |
| LbrM20_V2.4870 | <i>L. braziliensis</i> | 161 | 1    | 161  |
| LbrM20_V2.4870 | <i>L. braziliensis</i> | 61  | 184  | 244  |
| LbrM20_V2.4870 | <i>L. braziliensis</i> | 81  | 522  | 602  |
| LbrM20_V2.4870 | <i>L. braziliensis</i> | 315 | 745  | 1059 |
| LbrM20_V2.4880 | <i>L. braziliensis</i> | 67  | 145  | 211  |
| LbrM20_V2.4880 | <i>L. braziliensis</i> | 104 | 356  | 459  |
| LbrM20_V2.4890 | <i>L. braziliensis</i> | 41  | 116  | 156  |
| LbrM20_V2.4920 | <i>L. braziliensis</i> | 53  | 71   | 123  |
| LbrM20_V2.4920 | <i>L. braziliensis</i> | 135 | 159  | 293  |
| LbrM20_V2.4920 | <i>L. braziliensis</i> | 172 | 433  | 604  |
| LbrM20_V2.4920 | <i>L. braziliensis</i> | 184 | 651  | 834  |
| LbrM20_V2.4920 | <i>L. braziliensis</i> | 445 | 836  | 1280 |
| LbrM20_V2.4930 | <i>L. braziliensis</i> | 155 | 119  | 273  |
| LbrM20_V2.4930 | <i>L. braziliensis</i> | 377 | 621  | 997  |
| LbrM20_V2.4940 | <i>L. braziliensis</i> | 176 | 34   | 209  |
| LbrM20_V2.4940 | <i>L. braziliensis</i> | 74  | 454  | 527  |
| LbrM20_V2.4940 | <i>L. braziliensis</i> | 45  | 544  | 588  |
| LbrM20_V2.4940 | <i>L. braziliensis</i> | 55  | 651  | 705  |
| LbrM20_V2.4940 | <i>L. braziliensis</i> | 64  | 838  | 901  |
| LbrM20_V2.4950 | <i>L. braziliensis</i> | 248 | 1    | 248  |
| LbrM20_V2.4950 | <i>L. braziliensis</i> | 422 | 292  | 713  |
| LbrM20_V2.4950 | <i>L. braziliensis</i> | 78  | 739  | 816  |
| LbrM20_V2.4950 | <i>L. braziliensis</i> | 146 | 840  | 985  |
| LbrM20_V2.4950 | <i>L. braziliensis</i> | 81  | 1012 | 1092 |
| LbrM20_V2.4950 | <i>L. braziliensis</i> | 89  | 1117 | 1205 |
| LbrM20_V2.4950 | <i>L. braziliensis</i> | 577 | 1207 | 1783 |
| LbrM20_V2.4950 | <i>L. braziliensis</i> | 204 | 1804 | 2007 |

|                |                        |     |      |      |
|----------------|------------------------|-----|------|------|
| LbrM20_V2.4950 | <i>L. braziliensis</i> | 169 | 2188 | 2356 |
| LbrM20_V2.4950 | <i>L. braziliensis</i> | 173 | 2451 | 2623 |
| LbrM20_V2.4950 | <i>L. braziliensis</i> | 85  | 2640 | 2724 |
| LbrM20_V2.4950 | <i>L. braziliensis</i> | 285 | 3019 | 3303 |
| LbrM20_V2.4950 | <i>L. braziliensis</i> | 121 | 3818 | 3938 |
| LbrM20_V2.4960 | <i>L. braziliensis</i> | 98  | 82   | 179  |
| LbrM20_V2.4960 | <i>L. braziliensis</i> | 70  | 458  | 527  |
| LbrM20_V2.4970 | <i>L. braziliensis</i> | 55  | 32   | 86   |
| LbrM20_V2.4970 | <i>L. braziliensis</i> | 67  | 93   | 159  |
| LbrM20_V2.4970 | <i>L. braziliensis</i> | 41  | 337  | 377  |
| LbrM20_V2.4970 | <i>L. braziliensis</i> | 53  | 696  | 748  |
| LbrM20_V2.4980 | <i>L. braziliensis</i> | 114 | 1    | 114  |
| LbrM20_V2.4980 | <i>L. braziliensis</i> | 116 | 161  | 276  |
| LbrM20_V2.4980 | <i>L. braziliensis</i> | 55  | 287  | 341  |
| LbrM20_V2.5030 | <i>L. braziliensis</i> | 48  | 163  | 210  |
| LbrM20_V2.5030 | <i>L. braziliensis</i> | 92  | 608  | 699  |
| LbrM20_V2.5030 | <i>L. braziliensis</i> | 64  | 755  | 818  |
| LbrM20_V2.5030 | <i>L. braziliensis</i> | 66  | 975  | 1040 |
| LbrM20_V2.5030 | <i>L. braziliensis</i> | 51  | 1170 | 1220 |
| LbrM20_V2.5030 | <i>L. braziliensis</i> | 118 | 1354 | 1471 |
| LbrM20_V2.5030 | <i>L. braziliensis</i> | 86  | 1496 | 1581 |
| LbrM20_V2.5040 | <i>L. braziliensis</i> | 67  | 179  | 245  |
| LbrM20_V2.5050 | <i>L. braziliensis</i> | 49  | 146  | 194  |
| LbrM20_V2.5050 | <i>L. braziliensis</i> | 56  | 262  | 317  |
| LbrM20_V2.5050 | <i>L. braziliensis</i> | 90  | 601  | 690  |
| LbrM20_V2.5050 | <i>L. braziliensis</i> | 84  | 710  | 793  |
| LbrM20_V2.5060 | <i>L. braziliensis</i> | 60  | 97   | 156  |
| LbrM20_V2.5070 | <i>L. braziliensis</i> | 54  | 1    | 54   |
| LbrM20_V2.5070 | <i>L. braziliensis</i> | 45  | 135  | 179  |
| LbrM20_V2.5070 | <i>L. braziliensis</i> | 73  | 203  | 275  |
| LbrM20_V2.5080 | <i>L. braziliensis</i> | 44  | 34   | 77   |
| LbrM20_V2.5080 | <i>L. braziliensis</i> | 78  | 89   | 166  |
| LbrM20_V2.5080 | <i>L. braziliensis</i> | 154 | 454  | 607  |
| LbrM20_V2.5080 | <i>L. braziliensis</i> | 47  | 778  | 824  |
| LbrM20_V2.5090 | <i>L. braziliensis</i> | 175 | 97   | 271  |
| LbrM20_V2.5100 | <i>L. braziliensis</i> | 91  | 37   | 127  |
| LbrM20_V2.5100 | <i>L. braziliensis</i> | 80  | 140  | 219  |
| LbrM20_V2.5100 | <i>L. braziliensis</i> | 83  | 337  | 419  |
| LbrM20_V2.5100 | <i>L. braziliensis</i> | 41  | 529  | 569  |
| LbrM20_V2.5110 | <i>L. braziliensis</i> | 78  | 166  | 243  |
| LbrM20_V2.5110 | <i>L. braziliensis</i> | 45  | 476  | 520  |
| LbrM20_V2.5110 | <i>L. braziliensis</i> | 53  | 669  | 721  |
| LbrM20_V2.5110 | <i>L. braziliensis</i> | 61  | 749  | 809  |
| LbrM20_V2.5110 | <i>L. braziliensis</i> | 50  | 1787 | 1836 |
| LbrM20_V2.5110 | <i>L. braziliensis</i> | 41  | 1921 | 1961 |
| LbrM20_V2.5110 | <i>L. braziliensis</i> | 126 | 1990 | 2115 |
| LbrM20_V2.5120 | <i>L. braziliensis</i> | 155 | 197  | 351  |

|                |                        |     |      |      |
|----------------|------------------------|-----|------|------|
| LbrM20_V2.5120 | <i>L. braziliensis</i> | 77  | 356  | 432  |
| LbrM20_V2.5130 | <i>L. braziliensis</i> | 68  | 1    | 68   |
| LbrM20_V2.5130 | <i>L. braziliensis</i> | 49  | 119  | 167  |
| LbrM20_V2.5130 | <i>L. braziliensis</i> | 56  | 310  | 365  |
| LbrM20_V2.5130 | <i>L. braziliensis</i> | 44  | 383  | 426  |
| LbrM20_V2.5130 | <i>L. braziliensis</i> | 274 | 463  | 736  |
| LbrM20_V2.5140 | <i>L. braziliensis</i> | 195 | 1    | 195  |
| LbrM20_V2.5140 | <i>L. braziliensis</i> | 69  | 269  | 337  |
| LbrM20_V2.5140 | <i>L. braziliensis</i> | 130 | 365  | 494  |
| LbrM20_V2.5140 | <i>L. braziliensis</i> | 74  | 580  | 653  |
| LbrM20_V2.5140 | <i>L. braziliensis</i> | 147 | 692  | 838  |
| LbrM20_V2.5140 | <i>L. braziliensis</i> | 141 | 864  | 1004 |
| LbrM20_V2.5140 | <i>L. braziliensis</i> | 292 | 1043 | 1334 |
| LbrM20_V2.5140 | <i>L. braziliensis</i> | 251 | 1432 | 1682 |
| LbrM20_V2.5140 | <i>L. braziliensis</i> | 148 | 1722 | 1869 |
| LbrM20_V2.5140 | <i>L. braziliensis</i> | 350 | 1960 | 2309 |
| LbrM20_V2.5140 | <i>L. braziliensis</i> | 208 | 2324 | 2531 |
| LbrM20_V2.5140 | <i>L. braziliensis</i> | 58  | 2549 | 2606 |
| LbrM20_V2.5140 | <i>L. braziliensis</i> | 101 | 2619 | 2719 |
| LbrM20_V2.5140 | <i>L. braziliensis</i> | 76  | 3037 | 3112 |
| LbrM20_V2.5140 | <i>L. braziliensis</i> | 83  | 3270 | 3352 |
| LbrM20_V2.5140 | <i>L. braziliensis</i> | 88  | 3425 | 3512 |
| LbrM20_V2.5160 | <i>L. braziliensis</i> | 91  | 333  | 423  |
| LbrM20_V2.5160 | <i>L. braziliensis</i> | 97  | 449  | 545  |
| LbrM20_V2.5160 | <i>L. braziliensis</i> | 97  | 449  | 545  |
| LbrM20_V2.5170 | <i>L. braziliensis</i> | 609 | 121  | 729  |
| LbrM20_V2.5190 | <i>L. braziliensis</i> | 128 | 1    | 128  |
| LbrM20_V2.5190 | <i>L. braziliensis</i> | 273 | 136  | 408  |
| LbrM20_V2.5190 | <i>L. braziliensis</i> | 107 | 445  | 551  |
| LbrM20_V2.5190 | <i>L. braziliensis</i> | 170 | 617  | 786  |
| LbrM20_V2.5190 | <i>L. braziliensis</i> | 296 | 816  | 1111 |
| LbrM20_V2.5190 | <i>L. braziliensis</i> | 202 | 1117 | 1318 |
| LbrM20_V2.5200 | <i>L. braziliensis</i> | 151 | 1    | 151  |
| LbrM20_V2.5200 | <i>L. braziliensis</i> | 53  | 165  | 217  |
| LbrM20_V2.5210 | <i>L. braziliensis</i> | 204 | 1    | 204  |
| LbrM20_V2.5210 | <i>L. braziliensis</i> | 132 | 285  | 416  |
| LbrM20_V2.5210 | <i>L. braziliensis</i> | 77  | 421  | 497  |
| LbrM20_V2.5210 | <i>L. braziliensis</i> | 147 | 502  | 648  |
| LbrM20_V2.5210 | <i>L. braziliensis</i> | 128 | 700  | 827  |
| LbrM20_V2.5210 | <i>L. braziliensis</i> | 92  | 911  | 1002 |
| LbrM20_V2.5220 | <i>L. braziliensis</i> | 112 | 1    | 112  |
| LbrM20_V2.5220 | <i>L. braziliensis</i> | 372 | 129  | 500  |
| LbrM20_V2.5220 | <i>L. braziliensis</i> | 291 | 618  | 908  |
| LbrM20_V2.5220 | <i>L. braziliensis</i> | 373 | 926  | 1298 |
| LbrM20_V2.5230 | <i>L. braziliensis</i> | 267 | 1    | 267  |
| LbrM20_V2.5240 | <i>L. braziliensis</i> | 243 | 1    | 243  |
| LbrM20_V2.5240 | <i>L. braziliensis</i> | 55  | 285  | 339  |

|                |                        |      |      |      |
|----------------|------------------------|------|------|------|
| LbrM20_V2.5240 | <i>L. braziliensis</i> | 63   | 427  | 489  |
| LbrM20_V2.5240 | <i>L. braziliensis</i> | 73   | 657  | 729  |
| LbrM20_V2.5240 | <i>L. braziliensis</i> | 204  | 1004 | 1207 |
| LbrM20_V2.5240 | <i>L. braziliensis</i> | 110  | 1239 | 1348 |
| LbrM20_V2.5240 | <i>L. braziliensis</i> | 54   | 1353 | 1406 |
| LbrM20_V2.5240 | <i>L. braziliensis</i> | 66   | 1445 | 1510 |
| LbrM20_V2.5240 | <i>L. braziliensis</i> | 209  | 1579 | 1787 |
| LbrM20_V2.5240 | <i>L. braziliensis</i> | 126  | 1872 | 1997 |
| LbrM20_V2.5240 | <i>L. braziliensis</i> | 145  | 1999 | 2143 |
| LbrM20_V2.5240 | <i>L. braziliensis</i> | 262  | 2298 | 2559 |
| LbrM20_V2.5250 | <i>L. braziliensis</i> | 275  | 1    | 275  |
| LbrM20_V2.5250 | <i>L. braziliensis</i> | 416  | 350  | 765  |
| LbrM20_V2.5250 | <i>L. braziliensis</i> | 52   | 793  | 844  |
| LbrM20_V2.5250 | <i>L. braziliensis</i> | 120  | 891  | 1010 |
| LbrM20_V2.5250 | <i>L. braziliensis</i> | 183  | 1186 | 1368 |
| LbrM20_V2.5250 | <i>L. braziliensis</i> | 136  | 1416 | 1551 |
| LbrM20_V2.5250 | <i>L. braziliensis</i> | 99   | 1665 | 1763 |
| LbrM20_V2.5250 | <i>L. braziliensis</i> | 53   | 1923 | 1975 |
| LbrM20_V2.5250 | <i>L. braziliensis</i> | 131  | 2057 | 2187 |
| LbrM20_V2.5250 | <i>L. braziliensis</i> | 40   | 2257 | 2296 |
| LbrM20_V2.5260 | <i>L. braziliensis</i> | 145  | 48   | 192  |
| LbrM20_V2.5260 | <i>L. braziliensis</i> | 82   | 233  | 314  |
| LbrM20_V2.5260 | <i>L. braziliensis</i> | 40   | 348  | 387  |
| LbrM20_V2.5260 | <i>L. braziliensis</i> | 58   | 480  | 537  |
| LbrM20_V2.5260 | <i>L. braziliensis</i> | 42   | 811  | 852  |
| LbrM20_V2.5260 | <i>L. braziliensis</i> | 45   | 963  | 1007 |
| LbrM20_V2.5260 | <i>L. braziliensis</i> | 91   | 1020 | 1110 |
| LbrM20_V2.5260 | <i>L. braziliensis</i> | 52   | 1591 | 1642 |
| LbrM20_V2.5260 | <i>L. braziliensis</i> | 200  | 1700 | 1899 |
| LbrM20_V2.5270 | <i>L. braziliensis</i> | 107  | 1    | 107  |
| LbrM20_V2.5270 | <i>L. braziliensis</i> | 1024 | 115  | 1138 |
| LbrM20_V2.5280 | <i>L. braziliensis</i> | 71   | 1    | 71   |
| LbrM20_V2.5280 | <i>L. braziliensis</i> | 77   | 89   | 165  |
| LbrM20_V2.5280 | <i>L. braziliensis</i> | 41   | 188  | 228  |
| LbrM20_V2.5280 | <i>L. braziliensis</i> | 138  | 610  | 747  |
| LbrM20_V2.5280 | <i>L. braziliensis</i> | 211  | 797  | 1007 |
| LbrM20_V2.5280 | <i>L. braziliensis</i> | 136  | 1613 | 1748 |
| LbrM20_V2.5280 | <i>L. braziliensis</i> | 206  | 1859 | 2064 |
| LbrM20_V2.5290 | <i>L. braziliensis</i> | 62   | 67   | 128  |
| LbrM20_V2.5290 | <i>L. braziliensis</i> | 107  | 281  | 387  |
| LbrM20_V2.5290 | <i>L. braziliensis</i> | 47   | 485  | 531  |
| LbrM20_V2.5290 | <i>L. braziliensis</i> | 88   | 566  | 653  |
| LbrM20_V2.5300 | <i>L. braziliensis</i> | 50   | 103  | 152  |
| LbrM20_V2.5310 | <i>L. braziliensis</i> | 52   | 150  | 201  |
| LbrM20_V2.5340 | <i>L. braziliensis</i> | 220  | 31   | 250  |
| LbrM20_V2.5340 | <i>L. braziliensis</i> | 58   | 284  | 341  |
| LbrM20_V2.5350 | <i>L. braziliensis</i> | 65   | 21   | 85   |



|                |                        |     |      |      |
|----------------|------------------------|-----|------|------|
| LbrM20_V2.5350 | <i>L. braziliensis</i> | 46  | 117  | 162  |
| LbrM20_V2.5350 | <i>L. braziliensis</i> | 46  | 117  | 162  |
| LbrM20_V2.5370 | <i>L. braziliensis</i> | 71  | 1    | 71   |
| LbrM20_V2.5370 | <i>L. braziliensis</i> | 68  | 160  | 227  |
| LbrM20_V2.5370 | <i>L. braziliensis</i> | 68  | 160  | 227  |
| LbrM20_V2.5380 | <i>L. braziliensis</i> | 178 | 1    | 178  |
| LbrM20_V2.5410 | <i>L. braziliensis</i> | 56  | 546  | 601  |
| LbrM20_V2.5420 | <i>L. braziliensis</i> | 135 | 1    | 135  |
| LbrM20_V2.5420 | <i>L. braziliensis</i> | 42  | 193  | 234  |
| LbrM20_V2.5460 | <i>L. braziliensis</i> | 224 | 1    | 224  |
| LbrM20_V2.5460 | <i>L. braziliensis</i> | 72  | 291  | 362  |
| LbrM20_V2.5460 | <i>L. braziliensis</i> | 134 | 467  | 600  |
| LbrM20_V2.5460 | <i>L. braziliensis</i> | 204 | 872  | 1075 |
| LbrM20_V2.5460 | <i>L. braziliensis</i> | 74  | 1311 | 1384 |
| LbrM20_V2.5460 | <i>L. braziliensis</i> | 51  | 1416 | 1466 |
| LbrM20_V2.5460 | <i>L. braziliensis</i> | 81  | 1605 | 1685 |
| LbrM20_V2.5460 | <i>L. braziliensis</i> | 74  | 1757 | 1830 |
| LbrM20_V2.5460 | <i>L. braziliensis</i> | 95  | 1914 | 2008 |
| LbrM20_V2.5460 | <i>L. braziliensis</i> | 46  | 2603 | 2648 |
| LbrM20_V2.5470 | <i>L. braziliensis</i> | 164 | 1    | 164  |
| LbrM20_V2.5480 | <i>L. braziliensis</i> | 55  | 63   | 117  |
| LbrM20_V2.5480 | <i>L. braziliensis</i> | 225 | 137  | 361  |
| LbrM20_V2.5480 | <i>L. braziliensis</i> | 101 | 405  | 505  |
| LbrM20_V2.5480 | <i>L. braziliensis</i> | 138 | 581  | 718  |
| LbrM20_V2.5490 | <i>L. braziliensis</i> | 47  | 66   | 112  |
| LbrM20_V2.5510 | <i>L. braziliensis</i> | 157 | 125  | 281  |
| LbrM20_V2.5540 | <i>L. braziliensis</i> | 160 | 1    | 160  |
| LbrM20_V2.5560 | <i>L. braziliensis</i> | 72  | 495  | 566  |
| LbrM20_V2.5570 | <i>L. braziliensis</i> | 48  | 158  | 205  |
| LbrM20_V2.5580 | <i>L. braziliensis</i> | 124 | 295  | 418  |
| LbrM20_V2.5590 | <i>L. braziliensis</i> | 105 | 1    | 105  |
| LbrM20_V2.5610 | <i>L. braziliensis</i> | 57  | 119  | 175  |
| LbrM20_V2.5620 | <i>L. braziliensis</i> | 136 | 1    | 136  |
| LbrM20_V2.5620 | <i>L. braziliensis</i> | 90  | 337  | 426  |
| LbrM20_V2.5620 | <i>L. braziliensis</i> | 51  | 554  | 604  |
| LbrM20_V2.5620 | <i>L. braziliensis</i> | 616 | 646  | 1261 |
| LbrM20_V2.5630 | <i>L. braziliensis</i> | 199 | 54   | 252  |
| LbrM20_V2.5640 | <i>L. braziliensis</i> | 101 | 52   | 152  |
| LbrM20_V2.5650 | <i>L. braziliensis</i> | 54  | 17   | 70   |
| LbrM20_V2.5650 | <i>L. braziliensis</i> | 69  | 402  | 470  |
| LbrM20_V2.5650 | <i>L. braziliensis</i> | 183 | 640  | 822  |
| LbrM20_V2.5660 | <i>L. braziliensis</i> | 118 | 104  | 221  |
| LbrM20_V2.5660 | <i>L. braziliensis</i> | 48  | 301  | 348  |
| LbrM20_V2.5660 | <i>L. braziliensis</i> | 72  | 460  | 531  |
| LbrM20_V2.5660 | <i>L. braziliensis</i> | 85  | 578  | 662  |
| LbrM20_V2.5660 | <i>L. braziliensis</i> | 381 | 715  | 1095 |
| LbrM20_V2.5680 | <i>L. braziliensis</i> | 144 | 1    | 144  |

|                |                        |     |      |      |
|----------------|------------------------|-----|------|------|
| LbrM20_V2.5690 | <i>L. braziliensis</i> | 156 | 192  | 347  |
| LbrM20_V2.5700 | <i>L. braziliensis</i> | 102 | 142  | 243  |
| LbrM20_V2.5710 | <i>L. braziliensis</i> | 58  | 45   | 102  |
| LbrM20_V2.5710 | <i>L. braziliensis</i> | 43  | 366  | 408  |
| LbrM20_V2.5710 | <i>L. braziliensis</i> | 43  | 366  | 408  |
| LbrM20_V2.5720 | <i>L. braziliensis</i> | 43  | 64   | 106  |
| LbrM20_V2.5720 | <i>L. braziliensis</i> | 106 | 163  | 268  |
| LbrM20_V2.5720 | <i>L. braziliensis</i> | 106 | 163  | 268  |
| LbrM20_V2.5730 | <i>L. braziliensis</i> | 71  | 86   | 156  |
| LbrM20_V2.5730 | <i>L. braziliensis</i> | 148 | 391  | 538  |
| LbrM20_V2.5730 | <i>L. braziliensis</i> | 42  | 689  | 730  |
| LbrM20_V2.5740 | <i>L. braziliensis</i> | 143 | 793  | 935  |
| LbrM20_V2.5750 | <i>L. braziliensis</i> | 93  | 334  | 426  |
| LbrM20_V2.5750 | <i>L. braziliensis</i> | 46  | 495  | 540  |
| LbrM20_V2.5750 | <i>L. braziliensis</i> | 62  | 701  | 762  |
| LbrM20_V2.5750 | <i>L. braziliensis</i> | 195 | 781  | 975  |
| LbrM20_V2.5760 | <i>L. braziliensis</i> | 62  | 1347 | 1408 |
| LbrM20_V2.5760 | <i>L. braziliensis</i> | 62  | 1729 | 1790 |
| LbrM20_V2.5760 | <i>L. braziliensis</i> | 41  | 1864 | 1904 |
| LbrM20_V2.5770 | <i>L. braziliensis</i> | 119 | 1    | 119  |
| LbrM20_V2.5770 | <i>L. braziliensis</i> | 50  | 409  | 458  |
| LbrM20_V2.5770 | <i>L. braziliensis</i> | 48  | 641  | 688  |
| LbrM20_V2.5770 | <i>L. braziliensis</i> | 53  | 958  | 1010 |
| LbrM20_V2.5770 | <i>L. braziliensis</i> | 48  | 1181 | 1228 |
| LbrM20_V2.5770 | <i>L. braziliensis</i> | 44  | 1347 | 1390 |
| LbrM20_V2.5770 | <i>L. braziliensis</i> | 72  | 1440 | 1511 |
| LbrM20_V2.5770 | <i>L. braziliensis</i> | 148 | 1588 | 1735 |
| LbrM20_V2.5780 | <i>L. braziliensis</i> | 45  | 211  | 255  |
| LbrM20_V2.5780 | <i>L. braziliensis</i> | 50  | 262  | 311  |
| LbrM20_V2.5780 | <i>L. braziliensis</i> | 51  | 449  | 499  |
| LbrM20_V2.5780 | <i>L. braziliensis</i> | 44  | 678  | 721  |
| LbrM20_V2.5780 | <i>L. braziliensis</i> | 81  | 743  | 823  |
| LbrM20_V2.5790 | <i>L. braziliensis</i> | 148 | 37   | 184  |
| LbrM20_V2.5800 | <i>L. braziliensis</i> | 65  | 90   | 154  |
| LbrM20_V2.5800 | <i>L. braziliensis</i> | 49  | 165  | 213  |
| LbrM20_V2.5800 | <i>L. braziliensis</i> | 49  | 165  | 213  |
| LbrM20_V2.5810 | <i>L. braziliensis</i> | 45  | 1    | 45   |
| LbrM20_V2.5820 | <i>L. braziliensis</i> | 136 | 265  | 400  |
| LbrM20_V2.5830 | <i>L. braziliensis</i> | 101 | 1    | 101  |
| LbrM20_V2.5830 | <i>L. braziliensis</i> | 51  | 266  | 316  |
| LbrM20_V2.5840 | <i>L. braziliensis</i> | 47  | 31   | 77   |
| LbrM20_V2.5840 | <i>L. braziliensis</i> | 45  | 102  | 146  |
| LbrM20_V2.5840 | <i>L. braziliensis</i> | 41  | 761  | 801  |
| LbrM20_V2.5860 | <i>L. braziliensis</i> | 77  | 1    | 77   |
| LbrM20_V2.5860 | <i>L. braziliensis</i> | 91  | 101  | 191  |
| LbrM20_V2.5860 | <i>L. braziliensis</i> | 44  | 235  | 278  |
| LbrM20_V2.5870 | <i>L. braziliensis</i> | 51  | 103  | 153  |

|                |                        |     |      |      |
|----------------|------------------------|-----|------|------|
| LbrM20_V2.5870 | <i>L. braziliensis</i> | 44  | 561  | 604  |
| LbrM20_V2.5870 | <i>L. braziliensis</i> | 44  | 561  | 604  |
| LbrM20_V2.5880 | <i>L. braziliensis</i> | 55  | 183  | 237  |
| LbrM20_V2.5890 | <i>L. braziliensis</i> | 51  | 276  | 326  |
| LbrM20_V2.5900 | <i>L. braziliensis</i> | 48  | 72   | 119  |
| LbrM20_V2.5920 | <i>L. braziliensis</i> | 44  | 1    | 44   |
| LbrM20_V2.5940 | <i>L. braziliensis</i> | 92  | 80   | 171  |
| LbrM20_V2.5940 | <i>L. braziliensis</i> | 54  | 617  | 670  |
| LbrM20_V2.5940 | <i>L. braziliensis</i> | 78  | 941  | 1018 |
| LbrM20_V2.5970 | <i>L. braziliensis</i> | 40  | 114  | 153  |
| LbrM20_V2.5980 | <i>L. braziliensis</i> | 62  | 170  | 231  |
| LbrM20_V2.5990 | <i>L. braziliensis</i> | 268 | 103  | 370  |
| LbrM20_V2.5990 | <i>L. braziliensis</i> | 52  | 388  | 439  |
| LbrM20_V2.6000 | <i>L. braziliensis</i> | 49  | 496  | 544  |
| LbrM20_V2.6030 | <i>L. braziliensis</i> | 91  | 218  | 308  |
| LbrM20_V2.6040 | <i>L. braziliensis</i> | 78  | 1    | 78   |
| LbrM20_V2.6050 | <i>L. braziliensis</i> | 358 | 1    | 358  |
| LbrM20_V2.6050 | <i>L. braziliensis</i> | 263 | 360  | 622  |
| LbrM20_V2.6070 | <i>L. braziliensis</i> | 172 | 215  | 386  |
| LbrM20_V2.6070 | <i>L. braziliensis</i> | 111 | 566  | 676  |
| LbrM20_V2.6070 | <i>L. braziliensis</i> | 40  | 893  | 932  |
| LbrM20_V2.6070 | <i>L. braziliensis</i> | 58  | 1467 | 1524 |
| LbrM20_V2.6080 | <i>L. braziliensis</i> | 177 | 195  | 371  |
| LbrM20_V2.6080 | <i>L. braziliensis</i> | 111 | 551  | 661  |
| LbrM20_V2.6080 | <i>L. braziliensis</i> | 43  | 875  | 917  |
| LbrM20_V2.6090 | <i>L. braziliensis</i> | 60  | 67   | 126  |
| LbrM20_V2.6090 | <i>L. braziliensis</i> | 44  | 301  | 344  |
| LbrM20_V2.6090 | <i>L. braziliensis</i> | 89  | 389  | 477  |
| LbrM20_V2.6090 | <i>L. braziliensis</i> | 176 | 689  | 864  |
| LbrM20_V2.6090 | <i>L. braziliensis</i> | 111 | 1044 | 1154 |
| LbrM20_V2.6090 | <i>L. braziliensis</i> | 41  | 1371 | 1411 |
| LbrM20_V2.6100 | <i>L. braziliensis</i> | 674 | 1    | 674  |
| LbrM20_V2.6100 | <i>L. braziliensis</i> | 99  | 688  | 786  |
| LbrM20_V2.6100 | <i>L. braziliensis</i> | 81  | 800  | 880  |
| LbrM20_V2.6110 | <i>L. braziliensis</i> | 90  | 1    | 90   |
| LbrM20_V2.6110 | <i>L. braziliensis</i> | 171 | 295  | 465  |
| LbrM20_V2.6110 | <i>L. braziliensis</i> | 120 | 630  | 749  |
| LbrM20_V2.6110 | <i>L. braziliensis</i> | 58  | 1540 | 1597 |
| LbrM20_V2.6120 | <i>L. braziliensis</i> | 176 | 167  | 342  |
| LbrM20_V2.6120 | <i>L. braziliensis</i> | 110 | 521  | 630  |
| LbrM20_V2.6120 | <i>L. braziliensis</i> | 42  | 845  | 886  |
| LbrM20_V2.6120 | <i>L. braziliensis</i> | 58  | 1422 | 1479 |
| LbrM20_V2.6130 | <i>L. braziliensis</i> | 111 | 1    | 111  |
| LbrM20_V2.6130 | <i>L. braziliensis</i> | 201 | 113  | 313  |
| LbrM20_V2.6130 | <i>L. braziliensis</i> | 148 | 323  | 470  |
| LbrM20_V2.6130 | <i>L. braziliensis</i> | 92  | 509  | 600  |
| LbrM20_V2.6130 | <i>L. braziliensis</i> | 60  | 623  | 682  |

|                |                        |     |      |      |
|----------------|------------------------|-----|------|------|
| LbrM20_V2.6130 | <i>L. braziliensis</i> | 44  | 684  | 727  |
| LbrM20_V2.6140 | <i>L. braziliensis</i> | 172 | 52   | 223  |
| LbrM20_V2.6140 | <i>L. braziliensis</i> | 112 | 402  | 513  |
| LbrM20_V2.6140 | <i>L. braziliensis</i> | 41  | 730  | 770  |
| LbrM20_V2.6140 | <i>L. braziliensis</i> | 62  | 847  | 908  |
| LbrM20_V2.6140 | <i>L. braziliensis</i> | 58  | 1304 | 1361 |
| LbrM21_V2.0010 | <i>L. braziliensis</i> | 60  | 1    | 60   |
| LbrM21_V2.0060 | <i>L. braziliensis</i> | 80  | 120  | 199  |
| LbrM21_V2.0070 | <i>L. braziliensis</i> | 46  | 1    | 46   |
| LbrM21_V2.0070 | <i>L. braziliensis</i> | 68  | 121  | 188  |
| LbrM21_V2.0070 | <i>L. braziliensis</i> | 68  | 121  | 188  |
| LbrM21_V2.0080 | <i>L. braziliensis</i> | 41  | 111  | 151  |
| LbrM21_V2.0100 | <i>L. braziliensis</i> | 56  | 1    | 56   |
| LbrM21_V2.0110 | <i>L. braziliensis</i> | 52  | 246  | 297  |
| LbrM21_V2.0140 | <i>L. braziliensis</i> | 67  | 85   | 151  |
| LbrM21_V2.0160 | <i>L. braziliensis</i> | 101 | 488  | 588  |
| LbrM21_V2.0160 | <i>L. braziliensis</i> | 53  | 696  | 748  |
| LbrM21_V2.0160 | <i>L. braziliensis</i> | 53  | 696  | 748  |
| LbrM21_V2.0170 | <i>L. braziliensis</i> | 48  | 379  | 426  |
| LbrM21_V2.0170 | <i>L. braziliensis</i> | 42  | 538  | 579  |
| LbrM21_V2.0170 | <i>L. braziliensis</i> | 55  | 745  | 799  |
| LbrM21_V2.0180 | <i>L. braziliensis</i> | 82  | 168  | 249  |
| LbrM21_V2.0180 | <i>L. braziliensis</i> | 43  | 783  | 825  |
| LbrM21_V2.0190 | <i>L. braziliensis</i> | 54  | 87   | 140  |
| LbrM21_V2.0190 | <i>L. braziliensis</i> | 202 | 482  | 683  |
| LbrM21_V2.0200 | <i>L. braziliensis</i> | 43  | 508  | 550  |
| LbrM21_V2.0210 | <i>L. braziliensis</i> | 44  | 1    | 44   |
| LbrM21_V2.0220 | <i>L. braziliensis</i> | 96  | 430  | 525  |
| LbrM21_V2.0230 | <i>L. braziliensis</i> | 62  | 1    | 62   |
| LbrM21_V2.0230 | <i>L. braziliensis</i> | 43  | 154  | 196  |
| LbrM21_V2.0230 | <i>L. braziliensis</i> | 43  | 154  | 196  |
| LbrM21_V2.0240 | <i>L. braziliensis</i> | 129 | 180  | 308  |
| LbrM21_V2.0240 | <i>L. braziliensis</i> | 150 | 314  | 463  |
| LbrM21_V2.0240 | <i>L. braziliensis</i> | 40  | 1221 | 1260 |
| LbrM21_V2.0250 | <i>L. braziliensis</i> | 85  | 59   | 143  |
| LbrM21_V2.0250 | <i>L. braziliensis</i> | 92  | 514  | 605  |
| LbrM21_V2.0250 | <i>L. braziliensis</i> | 92  | 514  | 605  |
| LbrM21_V2.0260 | <i>L. braziliensis</i> | 47  | 113  | 159  |
| LbrM21_V2.0300 | <i>L. braziliensis</i> | 49  | 299  | 347  |
| LbrM21_V2.0300 | <i>L. braziliensis</i> | 59  | 463  | 521  |
| LbrM21_V2.0300 | <i>L. braziliensis</i> | 58  | 538  | 595  |
| LbrM21_V2.0330 | <i>L. braziliensis</i> | 51  | 159  | 209  |
| LbrM21_V2.0330 | <i>L. braziliensis</i> | 96  | 272  | 367  |
| LbrM21_V2.0330 | <i>L. braziliensis</i> | 57  | 600  | 656  |
| LbrM21_V2.0330 | <i>L. braziliensis</i> | 90  | 717  | 806  |
| LbrM21_V2.0330 | <i>L. braziliensis</i> | 64  | 970  | 1033 |
| LbrM21_V2.0340 | <i>L. braziliensis</i> | 88  | 185  | 272  |

|                |                        |     |      |      |
|----------------|------------------------|-----|------|------|
| LbrM21_V2.0340 | <i>L. braziliensis</i> | 46  | 414  | 459  |
| LbrM21_V2.0350 | <i>L. braziliensis</i> | 69  | 39   | 107  |
| LbrM21_V2.0350 | <i>L. braziliensis</i> | 68  | 153  | 220  |
| LbrM21_V2.0350 | <i>L. braziliensis</i> | 52  | 277  | 328  |
| LbrM21_V2.0350 | <i>L. braziliensis</i> | 53  | 371  | 423  |
| LbrM21_V2.0350 | <i>L. braziliensis</i> | 59  | 558  | 616  |
| LbrM21_V2.0350 | <i>L. braziliensis</i> | 53  | 648  | 700  |
| LbrM21_V2.0350 | <i>L. braziliensis</i> | 73  | 779  | 851  |
| LbrM21_V2.0350 | <i>L. braziliensis</i> | 41  | 1037 | 1077 |
| LbrM21_V2.0360 | <i>L. braziliensis</i> | 48  | 1    | 48   |
| LbrM21_V2.0360 | <i>L. braziliensis</i> | 61  | 182  | 242  |
| LbrM21_V2.0380 | <i>L. braziliensis</i> | 73  | 1    | 73   |
| LbrM21_V2.0380 | <i>L. braziliensis</i> | 111 | 127  | 237  |
| LbrM21_V2.0390 | <i>L. braziliensis</i> | 76  | 1    | 76   |
| LbrM21_V2.0390 | <i>L. braziliensis</i> | 77  | 641  | 717  |
| LbrM21_V2.0390 | <i>L. braziliensis</i> | 183 | 856  | 1038 |
| LbrM21_V2.0410 | <i>L. braziliensis</i> | 92  | 1    | 92   |
| LbrM21_V2.0420 | <i>L. braziliensis</i> | 92  | 1    | 92   |
| LbrM21_V2.0420 | <i>L. braziliensis</i> | 164 | 112  | 275  |
| LbrM21_V2.0430 | <i>L. braziliensis</i> | 136 | 96   | 231  |
| LbrM21_V2.0450 | <i>L. braziliensis</i> | 40  | 87   | 126  |
| LbrM21_V2.0450 | <i>L. braziliensis</i> | 45  | 249  | 293  |
| LbrM21_V2.0450 | <i>L. braziliensis</i> | 45  | 249  | 293  |
| LbrM21_V2.0460 | <i>L. braziliensis</i> | 97  | 1    | 97   |
| LbrM21_V2.0460 | <i>L. braziliensis</i> | 146 | 129  | 274  |
| LbrM21_V2.0460 | <i>L. braziliensis</i> | 49  | 418  | 466  |
| LbrM21_V2.0460 | <i>L. braziliensis</i> | 59  | 603  | 661  |
| LbrM21_V2.0470 | <i>L. braziliensis</i> | 66  | 52   | 117  |
| LbrM21_V2.0470 | <i>L. braziliensis</i> | 40  | 204  | 243  |
| LbrM21_V2.0470 | <i>L. braziliensis</i> | 44  | 387  | 430  |
| LbrM21_V2.0470 | <i>L. braziliensis</i> | 48  | 632  | 679  |
| LbrM21_V2.0480 | <i>L. braziliensis</i> | 49  | 29   | 77   |
| LbrM21_V2.0480 | <i>L. braziliensis</i> | 58  | 334  | 391  |
| LbrM21_V2.0480 | <i>L. braziliensis</i> | 51  | 517  | 567  |
| LbrM21_V2.0490 | <i>L. braziliensis</i> | 192 | 169  | 360  |
| LbrM21_V2.0520 | <i>L. braziliensis</i> | 43  | 206  | 248  |
| LbrM21_V2.0520 | <i>L. braziliensis</i> | 98  | 386  | 483  |
| LbrM21_V2.0520 | <i>L. braziliensis</i> | 270 | 500  | 769  |
| LbrM21_V2.0520 | <i>L. braziliensis</i> | 41  | 814  | 854  |
| LbrM21_V2.0530 | <i>L. braziliensis</i> | 65  | 229  | 293  |
| LbrM21_V2.0530 | <i>L. braziliensis</i> | 51  | 712  | 762  |
| LbrM21_V2.0530 | <i>L. braziliensis</i> | 51  | 712  | 762  |
| LbrM21_V2.0540 | <i>L. braziliensis</i> | 204 | 1    | 204  |
| LbrM21_V2.0540 | <i>L. braziliensis</i> | 75  | 440  | 514  |
| LbrM21_V2.0550 | <i>L. braziliensis</i> | 89  | 369  | 457  |
| LbrM21_V2.0570 | <i>L. braziliensis</i> | 122 | 434  | 555  |
| LbrM21_V2.0580 | <i>L. braziliensis</i> | 48  | 96   | 143  |

|                |                        |     |      |      |
|----------------|------------------------|-----|------|------|
| LbrM21_V2.0580 | <i>L. braziliensis</i> | 46  | 366  | 411  |
| LbrM21_V2.0580 | <i>L. braziliensis</i> | 46  | 366  | 411  |
| LbrM21_V2.0590 | <i>L. braziliensis</i> | 48  | 89   | 136  |
| LbrM21_V2.0590 | <i>L. braziliensis</i> | 71  | 156  | 226  |
| LbrM21_V2.0590 | <i>L. braziliensis</i> | 68  | 251  | 318  |
| LbrM21_V2.0590 | <i>L. braziliensis</i> | 51  | 371  | 421  |
| LbrM21_V2.0590 | <i>L. braziliensis</i> | 40  | 441  | 480  |
| LbrM21_V2.0590 | <i>L. braziliensis</i> | 64  | 741  | 804  |
| LbrM21_V2.0600 | <i>L. braziliensis</i> | 49  | 175  | 223  |
| LbrM21_V2.0600 | <i>L. braziliensis</i> | 67  | 270  | 336  |
| LbrM21_V2.0610 | <i>L. braziliensis</i> | 64  | 91   | 154  |
| LbrM21_V2.0610 | <i>L. braziliensis</i> | 64  | 156  | 219  |
| LbrM21_V2.0610 | <i>L. braziliensis</i> | 64  | 156  | 219  |
| LbrM21_V2.0630 | <i>L. braziliensis</i> | 242 | 180  | 421  |
| LbrM21_V2.0640 | <i>L. braziliensis</i> | 102 | 136  | 237  |
| LbrM21_V2.0640 | <i>L. braziliensis</i> | 63  | 272  | 334  |
| LbrM21_V2.0640 | <i>L. braziliensis</i> | 49  | 373  | 421  |
| LbrM21_V2.0650 | <i>L. braziliensis</i> | 219 | 1    | 219  |
| LbrM21_V2.0650 | <i>L. braziliensis</i> | 119 | 263  | 381  |
| LbrM21_V2.0660 | <i>L. braziliensis</i> | 57  | 369  | 425  |
| LbrM21_V2.0670 | <i>L. braziliensis</i> | 76  | 216  | 291  |
| LbrM21_V2.0670 | <i>L. braziliensis</i> | 60  | 426  | 485  |
| LbrM21_V2.0680 | <i>L. braziliensis</i> | 43  | 331  | 373  |
| LbrM21_V2.0680 | <i>L. braziliensis</i> | 48  | 497  | 544  |
| LbrM21_V2.0680 | <i>L. braziliensis</i> | 209 | 550  | 758  |
| LbrM21_V2.0690 | <i>L. braziliensis</i> | 192 | 566  | 757  |
| LbrM21_V2.0710 | <i>L. braziliensis</i> | 79  | 198  | 276  |
| LbrM21_V2.0740 | <i>L. braziliensis</i> | 40  | 393  | 432  |
| LbrM21_V2.0760 | <i>L. braziliensis</i> | 398 | 224  | 621  |
| LbrM21_V2.0770 | <i>L. braziliensis</i> | 83  | 577  | 659  |
| LbrM21_V2.0780 | <i>L. braziliensis</i> | 68  | 51   | 118  |
| LbrM21_V2.0800 | <i>L. braziliensis</i> | 40  | 66   | 105  |
| LbrM21_V2.0830 | <i>L. braziliensis</i> | 46  | 589  | 634  |
| LbrM21_V2.0850 | <i>L. braziliensis</i> | 48  | 32   | 79   |
| LbrM21_V2.0850 | <i>L. braziliensis</i> | 182 | 308  | 489  |
| LbrM21_V2.0850 | <i>L. braziliensis</i> | 182 | 308  | 489  |
| LbrM21_V2.0860 | <i>L. braziliensis</i> | 242 | 57   | 298  |
| LbrM21_V2.0860 | <i>L. braziliensis</i> | 114 | 408  | 521  |
| LbrM21_V2.0860 | <i>L. braziliensis</i> | 42  | 660  | 701  |
| LbrM21_V2.0860 | <i>L. braziliensis</i> | 187 | 787  | 973  |
| LbrM21_V2.0870 | <i>L. braziliensis</i> | 103 | 184  | 286  |
| LbrM21_V2.0890 | <i>L. braziliensis</i> | 58  | 75   | 132  |
| LbrM21_V2.0890 | <i>L. braziliensis</i> | 57  | 767  | 823  |
| LbrM21_V2.0890 | <i>L. braziliensis</i> | 84  | 1071 | 1154 |
| LbrM21_V2.0890 | <i>L. braziliensis</i> | 86  | 1405 | 1490 |
| LbrM21_V2.0910 | <i>L. braziliensis</i> | 353 | 1    | 353  |
| LbrM21_V2.0910 | <i>L. braziliensis</i> | 49  | 879  | 927  |

|                |                        |     |      |      |
|----------------|------------------------|-----|------|------|
| LbrM21_V2.0920 | <i>L. braziliensis</i> | 58  | 62   | 119  |
| LbrM21_V2.0920 | <i>L. braziliensis</i> | 43  | 136  | 178  |
| LbrM21_V2.0920 | <i>L. braziliensis</i> | 61  | 246  | 306  |
| LbrM21_V2.0920 | <i>L. braziliensis</i> | 136 | 390  | 525  |
| LbrM21_V2.0920 | <i>L. braziliensis</i> | 71  | 706  | 776  |
| LbrM21_V2.0920 | <i>L. braziliensis</i> | 63  | 813  | 875  |
| LbrM21_V2.0930 | <i>L. braziliensis</i> | 47  | 1    | 47   |
| LbrM21_V2.0930 | <i>L. braziliensis</i> | 137 | 81   | 217  |
| LbrM21_V2.0930 | <i>L. braziliensis</i> | 536 | 221  | 756  |
| LbrM21_V2.0930 | <i>L. braziliensis</i> | 136 | 825  | 960  |
| LbrM21_V2.0930 | <i>L. braziliensis</i> | 474 | 987  | 1460 |
| LbrM21_V2.0930 | <i>L. braziliensis</i> | 406 | 1496 | 1901 |
| LbrM21_V2.0930 | <i>L. braziliensis</i> | 83  | 1980 | 2062 |
| LbrM21_V2.0930 | <i>L. braziliensis</i> | 755 | 2088 | 2842 |
| LbrM21_V2.0930 | <i>L. braziliensis</i> | 64  | 2889 | 2952 |
| LbrM21_V2.0930 | <i>L. braziliensis</i> | 87  | 2987 | 3073 |
| LbrM21_V2.0930 | <i>L. braziliensis</i> | 84  | 3098 | 3181 |
| LbrM21_V2.0950 | <i>L. braziliensis</i> | 163 | 1    | 163  |
| LbrM21_V2.0960 | <i>L. braziliensis</i> | 59  | 60   | 118  |
| LbrM21_V2.0980 | <i>L. braziliensis</i> | 109 | 127  | 235  |
| LbrM21_V2.0980 | <i>L. braziliensis</i> | 73  | 353  | 425  |
| LbrM21_V2.1010 | <i>L. braziliensis</i> | 163 | 156  | 318  |
| LbrM21_V2.1010 | <i>L. braziliensis</i> | 231 | 495  | 725  |
| LbrM21_V2.1010 | <i>L. braziliensis</i> | 60  | 788  | 847  |
| LbrM21_V2.1010 | <i>L. braziliensis</i> | 77  | 910  | 986  |
| LbrM21_V2.1010 | <i>L. braziliensis</i> | 240 | 1005 | 1244 |
| LbrM21_V2.1010 | <i>L. braziliensis</i> | 280 | 1288 | 1567 |
| LbrM21_V2.1010 | <i>L. braziliensis</i> | 198 | 1585 | 1782 |
| LbrM21_V2.1010 | <i>L. braziliensis</i> | 200 | 1874 | 2073 |
| LbrM21_V2.1010 | <i>L. braziliensis</i> | 40  | 2122 | 2161 |
| LbrM21_V2.1010 | <i>L. braziliensis</i> | 70  | 2219 | 2288 |
| LbrM21_V2.1020 | <i>L. braziliensis</i> | 41  | 1    | 41   |
| LbrM21_V2.1020 | <i>L. braziliensis</i> | 55  | 91   | 145  |
| LbrM21_V2.1020 | <i>L. braziliensis</i> | 46  | 181  | 226  |
| LbrM21_V2.1030 | <i>L. braziliensis</i> | 231 | 1    | 231  |
| LbrM21_V2.1030 | <i>L. braziliensis</i> | 364 | 283  | 646  |
| LbrM21_V2.1030 | <i>L. braziliensis</i> | 327 | 680  | 1006 |
| LbrM21_V2.1030 | <i>L. braziliensis</i> | 173 | 1008 | 1180 |
| LbrM21_V2.1030 | <i>L. braziliensis</i> | 209 | 1201 | 1409 |
| LbrM21_V2.1030 | <i>L. braziliensis</i> | 129 | 1470 | 1598 |
| LbrM21_V2.1030 | <i>L. braziliensis</i> | 132 | 1701 | 1832 |
| LbrM21_V2.1030 | <i>L. braziliensis</i> | 259 | 1951 | 2209 |
| LbrM21_V2.1030 | <i>L. braziliensis</i> | 62  | 2217 | 2278 |
| LbrM21_V2.1040 | <i>L. braziliensis</i> | 77  | 64   | 140  |
| LbrM21_V2.1040 | <i>L. braziliensis</i> | 50  | 176  | 225  |
| LbrM21_V2.1040 | <i>L. braziliensis</i> | 58  | 411  | 468  |
| LbrM21_V2.1040 | <i>L. braziliensis</i> | 40  | 524  | 563  |

|                |                        |     |      |      |
|----------------|------------------------|-----|------|------|
| LbrM21_V2.1050 | <i>L. braziliensis</i> | 129 | 1    | 129  |
| LbrM21_V2.1050 | <i>L. braziliensis</i> | 166 | 131  | 296  |
| LbrM21_V2.1050 | <i>L. braziliensis</i> | 60  | 350  | 409  |
| LbrM21_V2.1050 | <i>L. braziliensis</i> | 409 | 504  | 912  |
| LbrM21_V2.1060 | <i>L. braziliensis</i> | 302 | 548  | 849  |
| LbrM21_V2.1070 | <i>L. braziliensis</i> | 136 | 1    | 136  |
| LbrM21_V2.1070 | <i>L. braziliensis</i> | 180 | 156  | 335  |
| LbrM21_V2.1070 | <i>L. braziliensis</i> | 85  | 636  | 720  |
| LbrM21_V2.1080 | <i>L. braziliensis</i> | 111 | 1    | 111  |
| LbrM21_V2.1080 | <i>L. braziliensis</i> | 90  | 316  | 405  |
| LbrM21_V2.1080 | <i>L. braziliensis</i> | 54  | 530  | 583  |
| LbrM21_V2.1080 | <i>L. braziliensis</i> | 41  | 863  | 903  |
| LbrM21_V2.1110 | <i>L. braziliensis</i> | 47  | 349  | 395  |
| LbrM21_V2.1110 | <i>L. braziliensis</i> | 47  | 449  | 495  |
| LbrM21_V2.1110 | <i>L. braziliensis</i> | 97  | 585  | 681  |
| LbrM21_V2.1110 | <i>L. braziliensis</i> | 164 | 750  | 913  |
| LbrM21_V2.1120 | <i>L. braziliensis</i> | 76  | 31   | 106  |
| LbrM21_V2.1130 | <i>L. braziliensis</i> | 136 | 22   | 157  |
| LbrM21_V2.1130 | <i>L. braziliensis</i> | 48  | 387  | 434  |
| LbrM21_V2.1140 | <i>L. braziliensis</i> | 43  | 90   | 132  |
| LbrM21_V2.1150 | <i>L. braziliensis</i> | 42  | 91   | 132  |
| LbrM21_V2.1160 | <i>L. braziliensis</i> | 43  | 90   | 132  |
| LbrM21_V2.1180 | <i>L. braziliensis</i> | 51  | 79   | 129  |
| LbrM21_V2.1180 | <i>L. braziliensis</i> | 52  | 137  | 188  |
| LbrM21_V2.1180 | <i>L. braziliensis</i> | 55  | 349  | 403  |
| LbrM21_V2.1190 | <i>L. braziliensis</i> | 41  | 122  | 162  |
| LbrM21_V2.1190 | <i>L. braziliensis</i> | 151 | 229  | 379  |
| LbrM21_V2.1190 | <i>L. braziliensis</i> | 293 | 416  | 708  |
| LbrM21_V2.1190 | <i>L. braziliensis</i> | 177 | 738  | 914  |
| LbrM21_V2.1200 | <i>L. braziliensis</i> | 120 | 223  | 342  |
| LbrM21_V2.1200 | <i>L. braziliensis</i> | 65  | 512  | 576  |
| LbrM21_V2.1230 | <i>L. braziliensis</i> | 49  | 1    | 49   |
| LbrM21_V2.1230 | <i>L. braziliensis</i> | 52  | 131  | 182  |
| LbrM21_V2.1230 | <i>L. braziliensis</i> | 59  | 225  | 283  |
| LbrM21_V2.1230 | <i>L. braziliensis</i> | 953 | 381  | 1333 |
| LbrM21_V2.1230 | <i>L. braziliensis</i> | 45  | 1355 | 1399 |
| LbrM21_V2.1230 | <i>L. braziliensis</i> | 238 | 1439 | 1676 |
| LbrM21_V2.1230 | <i>L. braziliensis</i> | 375 | 1711 | 2085 |
| LbrM21_V2.1250 | <i>L. braziliensis</i> | 80  | 1    | 80   |
| LbrM21_V2.1250 | <i>L. braziliensis</i> | 75  | 232  | 306  |
| LbrM21_V2.1260 | <i>L. braziliensis</i> | 145 | 1    | 145  |
| LbrM21_V2.1260 | <i>L. braziliensis</i> | 668 | 170  | 837  |
| LbrM21_V2.1270 | <i>L. braziliensis</i> | 57  | 87   | 143  |
| LbrM21_V2.1270 | <i>L. braziliensis</i> | 56  | 513  | 568  |
| LbrM21_V2.1270 | <i>L. braziliensis</i> | 50  | 635  | 684  |
| LbrM21_V2.1270 | <i>L. braziliensis</i> | 342 | 855  | 1196 |
| LbrM21_V2.1270 | <i>L. braziliensis</i> | 108 | 1323 | 1430 |



|                |                        |     |      |      |
|----------------|------------------------|-----|------|------|
| LbrM21_V2.1270 | <i>L. braziliensis</i> | 47  | 1624 | 1670 |
| LbrM21_V2.1270 | <i>L. braziliensis</i> | 155 | 1680 | 1834 |
| LbrM21_V2.1270 | <i>L. braziliensis</i> | 249 | 1871 | 2119 |
| LbrM21_V2.1320 | <i>L. braziliensis</i> | 44  | 1    | 44   |
| LbrM21_V2.1330 | <i>L. braziliensis</i> | 311 | 453  | 763  |
| LbrM21_V2.1330 | <i>L. braziliensis</i> | 42  | 823  | 864  |
| LbrM21_V2.1330 | <i>L. braziliensis</i> | 53  | 1240 | 1292 |
| LbrM21_V2.1330 | <i>L. braziliensis</i> | 50  | 1295 | 1344 |
| LbrM21_V2.1330 | <i>L. braziliensis</i> | 49  | 1486 | 1534 |
| LbrM21_V2.1330 | <i>L. braziliensis</i> | 40  | 1691 | 1730 |
| LbrM21_V2.1340 | <i>L. braziliensis</i> | 52  | 1    | 52   |
| LbrM21_V2.1340 | <i>L. braziliensis</i> | 44  | 205  | 248  |
| LbrM21_V2.1340 | <i>L. braziliensis</i> | 74  | 535  | 608  |
| LbrM21_V2.1350 | <i>L. braziliensis</i> | 441 | 12   | 452  |
| LbrM21_V2.1350 | <i>L. braziliensis</i> | 69  | 476  | 544  |
| LbrM21_V2.1360 | <i>L. braziliensis</i> | 345 | 1    | 345  |
| LbrM21_V2.1360 | <i>L. braziliensis</i> | 274 | 372  | 645  |
| LbrM21_V2.1360 | <i>L. braziliensis</i> | 178 | 720  | 897  |
| LbrM21_V2.1360 | <i>L. braziliensis</i> | 60  | 941  | 1000 |
| LbrM21_V2.1390 | <i>L. braziliensis</i> | 129 | 125  | 253  |
| LbrM21_V2.1390 | <i>L. braziliensis</i> | 51  | 738  | 788  |
| LbrM21_V2.1400 | <i>L. braziliensis</i> | 136 | 1    | 136  |
| LbrM21_V2.1410 | <i>L. braziliensis</i> | 104 | 180  | 283  |
| LbrM21_V2.1420 | <i>L. braziliensis</i> | 234 | 53   | 286  |
| LbrM21_V2.1420 | <i>L. braziliensis</i> | 144 | 395  | 538  |
| LbrM21_V2.1420 | <i>L. braziliensis</i> | 103 | 613  | 715  |
| LbrM21_V2.1420 | <i>L. braziliensis</i> | 255 | 722  | 976  |
| LbrM21_V2.1420 | <i>L. braziliensis</i> | 363 | 1002 | 1364 |
| LbrM21_V2.1440 | <i>L. braziliensis</i> | 71  | 1    | 71   |
| LbrM21_V2.1440 | <i>L. braziliensis</i> | 146 | 418  | 563  |
| LbrM21_V2.1440 | <i>L. braziliensis</i> | 64  | 565  | 628  |
| LbrM21_V2.1440 | <i>L. braziliensis</i> | 160 | 748  | 907  |
| LbrM21_V2.1440 | <i>L. braziliensis</i> | 95  | 941  | 1035 |
| LbrM21_V2.1440 | <i>L. braziliensis</i> | 198 | 1042 | 1239 |
| LbrM21_V2.1460 | <i>L. braziliensis</i> | 137 | 196  | 332  |
| LbrM21_V2.1460 | <i>L. braziliensis</i> | 136 | 346  | 481  |
| LbrM21_V2.1470 | <i>L. braziliensis</i> | 63  | 325  | 387  |
| LbrM21_V2.1470 | <i>L. braziliensis</i> | 96  | 457  | 552  |
| LbrM21_V2.1470 | <i>L. braziliensis</i> | 63  | 734  | 796  |
| LbrM21_V2.1480 | <i>L. braziliensis</i> | 294 | 149  | 442  |
| LbrM21_V2.1480 | <i>L. braziliensis</i> | 45  | 663  | 707  |
| LbrM21_V2.1480 | <i>L. braziliensis</i> | 50  | 717  | 766  |
| LbrM21_V2.1510 | <i>L. braziliensis</i> | 72  | 82   | 153  |
| LbrM21_V2.1510 | <i>L. braziliensis</i> | 80  | 156  | 235  |
| LbrM21_V2.1520 | <i>L. braziliensis</i> | 201 | 19   | 219  |
| LbrM21_V2.1520 | <i>L. braziliensis</i> | 193 | 225  | 417  |
| LbrM21_V2.1560 | <i>L. braziliensis</i> | 68  | 1    | 68   |

|                |                        |     |      |      |
|----------------|------------------------|-----|------|------|
| LbrM21_V2.1560 | <i>L. braziliensis</i> | 76  | 132  | 207  |
| LbrM21_V2.1570 | <i>L. braziliensis</i> | 172 | 1    | 172  |
| LbrM21_V2.1570 | <i>L. braziliensis</i> | 47  | 367  | 413  |
| LbrM21_V2.1570 | <i>L. braziliensis</i> | 247 | 424  | 670  |
| LbrM21_V2.1570 | <i>L. braziliensis</i> | 443 | 810  | 1252 |
| LbrM21_V2.1570 | <i>L. braziliensis</i> | 114 | 1475 | 1588 |
| LbrM21_V2.1590 | <i>L. braziliensis</i> | 67  | 1    | 67   |
| LbrM21_V2.1590 | <i>L. braziliensis</i> | 281 | 77   | 357  |
| LbrM21_V2.1590 | <i>L. braziliensis</i> | 67  | 359  | 425  |
| LbrM21_V2.1590 | <i>L. braziliensis</i> | 85  | 912  | 996  |
| LbrM21_V2.1590 | <i>L. braziliensis</i> | 456 | 1131 | 1586 |
| LbrM21_V2.1600 | <i>L. braziliensis</i> | 44  | 123  | 166  |
| LbrM21_V2.1610 | <i>L. braziliensis</i> | 181 | 330  | 510  |
| LbrM21_V2.1610 | <i>L. braziliensis</i> | 100 | 517  | 616  |
| LbrM21_V2.1610 | <i>L. braziliensis</i> | 49  | 740  | 788  |
| LbrM21_V2.1610 | <i>L. braziliensis</i> | 84  | 816  | 899  |
| LbrM21_V2.1610 | <i>L. braziliensis</i> | 112 | 938  | 1049 |
| LbrM21_V2.1620 | <i>L. braziliensis</i> | 181 | 1    | 181  |
| LbrM21_V2.1620 | <i>L. braziliensis</i> | 47  | 284  | 330  |
| LbrM21_V2.1620 | <i>L. braziliensis</i> | 54  | 379  | 432  |
| LbrM21_V2.1620 | <i>L. braziliensis</i> | 298 | 444  | 741  |
| LbrM21_V2.1630 | <i>L. braziliensis</i> | 153 | 1    | 153  |
| LbrM21_V2.1630 | <i>L. braziliensis</i> | 133 | 238  | 370  |
| LbrM21_V2.1630 | <i>L. braziliensis</i> | 229 | 444  | 672  |
| LbrM21_V2.1640 | <i>L. braziliensis</i> | 56  | 470  | 525  |
| LbrM21_V2.1650 | <i>L. braziliensis</i> | 61  | 189  | 249  |
| LbrM21_V2.1650 | <i>L. braziliensis</i> | 45  | 256  | 300  |
| LbrM21_V2.1650 | <i>L. braziliensis</i> | 130 | 324  | 453  |
| LbrM21_V2.1650 | <i>L. braziliensis</i> | 60  | 606  | 665  |
| LbrM21_V2.1650 | <i>L. braziliensis</i> | 67  | 699  | 765  |
| LbrM21_V2.1650 | <i>L. braziliensis</i> | 105 | 816  | 920  |
| LbrM21_V2.1650 | <i>L. braziliensis</i> | 41  | 1177 | 1217 |
| LbrM21_V2.1650 | <i>L. braziliensis</i> | 67  | 1273 | 1339 |
| LbrM21_V2.1660 | <i>L. braziliensis</i> | 47  | 22   | 68   |
| LbrM21_V2.1660 | <i>L. braziliensis</i> | 137 | 163  | 299  |
| LbrM21_V2.1660 | <i>L. braziliensis</i> | 137 | 163  | 299  |
| LbrM21_V2.1670 | <i>L. braziliensis</i> | 53  | 282  | 334  |
| LbrM21_V2.1670 | <i>L. braziliensis</i> | 42  | 576  | 617  |
| LbrM21_V2.1670 | <i>L. braziliensis</i> | 94  | 730  | 823  |
| LbrM21_V2.1670 | <i>L. braziliensis</i> | 331 | 1413 | 1743 |
| LbrM21_V2.1680 | <i>L. braziliensis</i> | 45  | 1    | 45   |
| LbrM21_V2.1690 | <i>L. braziliensis</i> | 187 | 247  | 433  |
| LbrM21_V2.1690 | <i>L. braziliensis</i> | 69  | 448  | 516  |
| LbrM21_V2.1700 | <i>L. braziliensis</i> | 46  | 368  | 413  |
| LbrM21_V2.1720 | <i>L. braziliensis</i> | 40  | 262  | 301  |
| LbrM21_V2.1730 | <i>L. braziliensis</i> | 71  | 72   | 142  |
| LbrM21_V2.1730 | <i>L. braziliensis</i> | 165 | 174  | 338  |

|                |                        |     |      |      |
|----------------|------------------------|-----|------|------|
| LbrM21_V2.1750 | <i>L. braziliensis</i> | 443 | 267  | 709  |
| LbrM21_V2.1760 | <i>L. braziliensis</i> | 302 | 86   | 387  |
| LbrM21_V2.1760 | <i>L. braziliensis</i> | 62  | 406  | 467  |
| LbrM21_V2.1770 | <i>L. braziliensis</i> | 79  | 1    | 79   |
| LbrM21_V2.1780 | <i>L. braziliensis</i> | 46  | 25   | 70   |
| LbrM21_V2.1790 | <i>L. braziliensis</i> | 55  | 130  | 184  |
| LbrM21_V2.1790 | <i>L. braziliensis</i> | 53  | 391  | 443  |
| LbrM21_V2.1790 | <i>L. braziliensis</i> | 53  | 391  | 443  |
| LbrM21_V2.1830 | <i>L. braziliensis</i> | 44  | 86   | 129  |
| LbrM21_V2.1830 | <i>L. braziliensis</i> | 105 | 382  | 486  |
| LbrM21_V2.1840 | <i>L. braziliensis</i> | 177 | 1    | 177  |
| LbrM21_V2.1840 | <i>L. braziliensis</i> | 303 | 220  | 522  |
| LbrM21_V2.1840 | <i>L. braziliensis</i> | 178 | 532  | 709  |
| LbrM21_V2.1860 | <i>L. braziliensis</i> | 76  | 322  | 397  |
| LbrM21_V2.1880 | <i>L. braziliensis</i> | 48  | 1    | 48   |
| LbrM21_V2.1880 | <i>L. braziliensis</i> | 66  | 115  | 180  |
| LbrM21_V2.1880 | <i>L. braziliensis</i> | 66  | 115  | 180  |
| LbrM21_V2.1890 | <i>L. braziliensis</i> | 40  | 97   | 136  |
| LbrM21_V2.1900 | <i>L. braziliensis</i> | 66  | 96   | 161  |
| LbrM21_V2.1930 | <i>L. braziliensis</i> | 50  | 1    | 50   |
| LbrM21_V2.1940 | <i>L. braziliensis</i> | 50  | 31   | 80   |
| LbrM21_V2.1970 | <i>L. braziliensis</i> | 61  | 40   | 100  |
| LbrM21_V2.1990 | <i>L. braziliensis</i> | 146 | 28   | 173  |
| LbrM21_V2.1990 | <i>L. braziliensis</i> | 72  | 502  | 573  |
| LbrM21_V2.1990 | <i>L. braziliensis</i> | 72  | 502  | 573  |
| LbrM21_V2.2030 | <i>L. braziliensis</i> | 65  | 1    | 65   |
| LbrM21_V2.2040 | <i>L. braziliensis</i> | 170 | 1    | 170  |
| LbrM21_V2.2080 | <i>L. braziliensis</i> | 47  | 155  | 201  |
| LbrM21_V2.2090 | <i>L. braziliensis</i> | 45  | 1    | 45   |
| LbrM21_V2.2090 | <i>L. braziliensis</i> | 48  | 184  | 231  |
| LbrM21_V2.2090 | <i>L. braziliensis</i> | 63  | 268  | 330  |
| LbrM21_V2.2090 | <i>L. braziliensis</i> | 123 | 419  | 541  |
| LbrM21_V2.2100 | <i>L. braziliensis</i> | 157 | 39   | 195  |
| LbrM21_V2.2100 | <i>L. braziliensis</i> | 95  | 204  | 298  |
| LbrM21_V2.2100 | <i>L. braziliensis</i> | 104 | 408  | 511  |
| LbrM21_V2.2120 | <i>L. braziliensis</i> | 43  | 287  | 329  |
| LbrM21_V2.2130 | <i>L. braziliensis</i> | 83  | 150  | 232  |
| LbrM21_V2.2140 | <i>L. braziliensis</i> | 94  | 192  | 285  |
| LbrM21_V2.2140 | <i>L. braziliensis</i> | 49  | 491  | 539  |
| LbrM21_V2.2150 | <i>L. braziliensis</i> | 40  | 404  | 443  |
| LbrM21_V2.2160 | <i>L. braziliensis</i> | 368 | 1    | 368  |
| LbrM21_V2.2160 | <i>L. braziliensis</i> | 108 | 378  | 485  |
| LbrM21_V2.2160 | <i>L. braziliensis</i> | 144 | 548  | 691  |
| LbrM21_V2.2160 | <i>L. braziliensis</i> | 318 | 704  | 1021 |
| LbrM21_V2.2160 | <i>L. braziliensis</i> | 594 | 1031 | 1624 |
| LbrM21_V2.2160 | <i>L. braziliensis</i> | 83  | 1638 | 1720 |
| LbrM21_V2.2170 | <i>L. braziliensis</i> | 43  | 153  | 195  |

|                |                        |     |      |      |
|----------------|------------------------|-----|------|------|
| LbrM21_V2.2170 | <i>L. braziliensis</i> | 85  | 229  | 313  |
| LbrM21_V2.2170 | <i>L. braziliensis</i> | 85  | 229  | 313  |
| LbrM21_V2.2180 | <i>L. braziliensis</i> | 101 | 112  | 212  |
| LbrM21_V2.2190 | <i>L. braziliensis</i> | 63  | 105  | 167  |
| LbrM21_V2.2190 | <i>L. braziliensis</i> | 111 | 235  | 345  |
| LbrM22_V2.0010 | <i>L. braziliensis</i> | 40  | 1    | 40   |
| LbrM22_V2.0010 | <i>L. braziliensis</i> | 62  | 503  | 564  |
| LbrM22_V2.0010 | <i>L. braziliensis</i> | 62  | 503  | 564  |
| LbrM22_V2.0020 | <i>L. braziliensis</i> | 48  | 98   | 145  |
| LbrM22_V2.0030 | <i>L. braziliensis</i> | 50  | 139  | 188  |
| LbrM22_V2.0050 | <i>L. braziliensis</i> | 159 | 1    | 159  |
| LbrM22_V2.0050 | <i>L. braziliensis</i> | 243 | 228  | 470  |
| LbrM22_V2.0060 | <i>L. braziliensis</i> | 283 | 86   | 368  |
| LbrM22_V2.0060 | <i>L. braziliensis</i> | 64  | 391  | 454  |
| LbrM22_V2.0060 | <i>L. braziliensis</i> | 85  | 474  | 558  |
| LbrM22_V2.0070 | <i>L. braziliensis</i> | 70  | 220  | 289  |
| LbrM22_V2.0080 | <i>L. braziliensis</i> | 53  | 1    | 53   |
| LbrM22_V2.0080 | <i>L. braziliensis</i> | 54  | 195  | 248  |
| LbrM22_V2.0080 | <i>L. braziliensis</i> | 54  | 195  | 248  |
| LbrM22_V2.0090 | <i>L. braziliensis</i> | 48  | 154  | 201  |
| LbrM22_V2.0120 | <i>L. braziliensis</i> | 42  | 1    | 42   |
| LbrM22_V2.0120 | <i>L. braziliensis</i> | 170 | 44   | 213  |
| LbrM22_V2.0120 | <i>L. braziliensis</i> | 170 | 44   | 213  |
| LbrM22_V2.0130 | <i>L. braziliensis</i> | 184 | 295  | 478  |
| LbrM22_V2.0140 | <i>L. braziliensis</i> | 221 | 79   | 299  |
| LbrM22_V2.0160 | <i>L. braziliensis</i> | 43  | 99   | 141  |
| LbrM22_V2.0160 | <i>L. braziliensis</i> | 135 | 207  | 341  |
| LbrM22_V2.0170 | <i>L. braziliensis</i> | 358 | 1    | 358  |
| LbrM22_V2.0180 | <i>L. braziliensis</i> | 74  | 11   | 84   |
| LbrM22_V2.0190 | <i>L. braziliensis</i> | 97  | 1    | 97   |
| LbrM22_V2.0200 | <i>L. braziliensis</i> | 121 | 1    | 121  |
| LbrM22_V2.0200 | <i>L. braziliensis</i> | 78  | 203  | 280  |
| LbrM22_V2.0200 | <i>L. braziliensis</i> | 43  | 379  | 421  |
| LbrM22_V2.0200 | <i>L. braziliensis</i> | 130 | 925  | 1054 |
| LbrM22_V2.0200 | <i>L. braziliensis</i> | 127 | 1399 | 1525 |
| LbrM22_V2.0210 | <i>L. braziliensis</i> | 51  | 701  | 751  |
| LbrM22_V2.0220 | <i>L. braziliensis</i> | 71  | 1    | 71   |
| LbrM22_V2.0230 | <i>L. braziliensis</i> | 93  | 1    | 93   |
| LbrM22_V2.0230 | <i>L. braziliensis</i> | 78  | 111  | 188  |
| LbrM22_V2.0230 | <i>L. braziliensis</i> | 82  | 190  | 271  |
| LbrM22_V2.0230 | <i>L. braziliensis</i> | 120 | 328  | 447  |
| LbrM22_V2.0250 | <i>L. braziliensis</i> | 62  | 215  | 276  |
| LbrM22_V2.0270 | <i>L. braziliensis</i> | 51  | 501  | 551  |
| LbrM22_V2.0270 | <i>L. braziliensis</i> | 53  | 725  | 777  |
| LbrM22_V2.0280 | <i>L. braziliensis</i> | 47  | 219  | 265  |
| LbrM22_V2.0280 | <i>L. braziliensis</i> | 64  | 336  | 399  |
| LbrM22_V2.0280 | <i>L. braziliensis</i> | 64  | 336  | 399  |

|                |                        |     |      |      |
|----------------|------------------------|-----|------|------|
| LbrM22_V2.0290 | <i>L. braziliensis</i> | 55  | 1    | 55   |
| LbrM22_V2.0290 | <i>L. braziliensis</i> | 49  | 416  | 464  |
| LbrM22_V2.0290 | <i>L. braziliensis</i> | 67  | 495  | 561  |
| LbrM22_V2.0300 | <i>L. braziliensis</i> | 61  | 509  | 569  |
| LbrM22_V2.0310 | <i>L. braziliensis</i> | 42  | 1    | 42   |
| LbrM22_V2.0310 | <i>L. braziliensis</i> | 101 | 116  | 216  |
| LbrM22_V2.0310 | <i>L. braziliensis</i> | 49  | 304  | 352  |
| LbrM22_V2.0320 | <i>L. braziliensis</i> | 479 | 1    | 479  |
| LbrM22_V2.0320 | <i>L. braziliensis</i> | 122 | 504  | 625  |
| LbrM22_V2.0320 | <i>L. braziliensis</i> | 65  | 697  | 761  |
| LbrM22_V2.0320 | <i>L. braziliensis</i> | 142 | 763  | 904  |
| LbrM22_V2.0320 | <i>L. braziliensis</i> | 61  | 1004 | 1064 |
| LbrM22_V2.0330 | <i>L. braziliensis</i> | 124 | 1    | 124  |
| LbrM22_V2.0340 | <i>L. braziliensis</i> | 119 | 1    | 119  |
| LbrM22_V2.0350 | <i>L. braziliensis</i> | 59  | 64   | 122  |
| LbrM22_V2.0350 | <i>L. braziliensis</i> | 53  | 153  | 205  |
| LbrM22_V2.0360 | <i>L. braziliensis</i> | 82  | 284  | 365  |
| LbrM22_V2.0360 | <i>L. braziliensis</i> | 97  | 582  | 678  |
| LbrM22_V2.0360 | <i>L. braziliensis</i> | 91  | 728  | 818  |
| LbrM22_V2.0370 | <i>L. braziliensis</i> | 42  | 49   | 90   |
| LbrM22_V2.0380 | <i>L. braziliensis</i> | 134 | 1    | 134  |
| LbrM22_V2.0380 | <i>L. braziliensis</i> | 57  | 259  | 315  |
| LbrM22_V2.0380 | <i>L. braziliensis</i> | 55  | 439  | 493  |
| LbrM22_V2.0390 | <i>L. braziliensis</i> | 43  | 306  | 348  |
| LbrM22_V2.0390 | <i>L. braziliensis</i> | 51  | 762  | 812  |
| LbrM22_V2.0390 | <i>L. braziliensis</i> | 63  | 1108 | 1170 |
| LbrM22_V2.0400 | <i>L. braziliensis</i> | 45  | 39   | 83   |
| LbrM22_V2.0410 | <i>L. braziliensis</i> | 65  | 66   | 130  |
| LbrM22_V2.0410 | <i>L. braziliensis</i> | 57  | 179  | 235  |
| LbrM22_V2.0410 | <i>L. braziliensis</i> | 58  | 712  | 769  |
| LbrM22_V2.0410 | <i>L. braziliensis</i> | 107 | 959  | 1065 |
| LbrM22_V2.0420 | <i>L. braziliensis</i> | 82  | 183  | 264  |
| LbrM22_V2.0430 | <i>L. braziliensis</i> | 59  | 260  | 318  |
| LbrM22_V2.0440 | <i>L. braziliensis</i> | 46  | 1    | 46   |
| LbrM22_V2.0440 | <i>L. braziliensis</i> | 43  | 100  | 142  |
| LbrM22_V2.0440 | <i>L. braziliensis</i> | 62  | 252  | 313  |
| LbrM22_V2.0440 | <i>L. braziliensis</i> | 101 | 457  | 557  |
| LbrM22_V2.0450 | <i>L. braziliensis</i> | 263 | 16   | 278  |
| LbrM22_V2.0450 | <i>L. braziliensis</i> | 56  | 419  | 474  |
| LbrM22_V2.0460 | <i>L. braziliensis</i> | 40  | 47   | 86   |
| LbrM22_V2.0460 | <i>L. braziliensis</i> | 56  | 165  | 220  |
| LbrM22_V2.0460 | <i>L. braziliensis</i> | 87  | 261  | 347  |
| LbrM22_V2.0460 | <i>L. braziliensis</i> | 114 | 407  | 520  |
| LbrM22_V2.0460 | <i>L. braziliensis</i> | 56  | 601  | 656  |
| LbrM22_V2.0470 | <i>L. braziliensis</i> | 40  | 50   | 89   |
| LbrM22_V2.0470 | <i>L. braziliensis</i> | 78  | 127  | 204  |
| LbrM22_V2.0470 | <i>L. braziliensis</i> | 55  | 228  | 282  |

|                |                        |      |      |      |
|----------------|------------------------|------|------|------|
| LbrM22_V2.0470 | <i>L. braziliensis</i> | 47   | 324  | 370  |
| LbrM22_V2.0470 | <i>L. braziliensis</i> | 76   | 489  | 564  |
| LbrM22_V2.0470 | <i>L. braziliensis</i> | 112  | 587  | 698  |
| LbrM22_V2.0480 | <i>L. braziliensis</i> | 41   | 1    | 41   |
| LbrM22_V2.0480 | <i>L. braziliensis</i> | 120  | 168  | 287  |
| LbrM22_V2.0480 | <i>L. braziliensis</i> | 120  | 168  | 287  |
| LbrM22_V2.0490 | <i>L. braziliensis</i> | 50   | 94   | 143  |
| LbrM22_V2.0490 | <i>L. braziliensis</i> | 151  | 236  | 386  |
| LbrM22_V2.0490 | <i>L. braziliensis</i> | 132  | 702  | 833  |
| LbrM22_V2.0490 | <i>L. braziliensis</i> | 50   | 852  | 901  |
| LbrM22_V2.0500 | <i>L. braziliensis</i> | 42   | 155  | 196  |
| LbrM22_V2.0500 | <i>L. braziliensis</i> | 93   | 249  | 341  |
| LbrM22_V2.0500 | <i>L. braziliensis</i> | 221  | 500  | 720  |
| LbrM22_V2.0510 | <i>L. braziliensis</i> | 52   | 307  | 358  |
| LbrM22_V2.0530 | <i>L. braziliensis</i> | 74   | 94   | 167  |
| LbrM22_V2.0530 | <i>L. braziliensis</i> | 53   | 309  | 361  |
| LbrM22_V2.0540 | <i>L. braziliensis</i> | 44   | 86   | 129  |
| LbrM22_V2.0540 | <i>L. braziliensis</i> | 58   | 233  | 290  |
| LbrM22_V2.0540 | <i>L. braziliensis</i> | 66   | 369  | 434  |
| LbrM22_V2.0550 | <i>L. braziliensis</i> | 107  | 1    | 107  |
| LbrM22_V2.0550 | <i>L. braziliensis</i> | 56   | 205  | 260  |
| LbrM22_V2.0560 | <i>L. braziliensis</i> | 90   | 1    | 90   |
| LbrM22_V2.0570 | <i>L. braziliensis</i> | 165  | 107  | 271  |
| LbrM22_V2.0570 | <i>L. braziliensis</i> | 47   | 593  | 639  |
| LbrM22_V2.0570 | <i>L. braziliensis</i> | 48   | 659  | 706  |
| LbrM22_V2.0570 | <i>L. braziliensis</i> | 50   | 924  | 973  |
| LbrM22_V2.0570 | <i>L. braziliensis</i> | 71   | 1325 | 1395 |
| LbrM22_V2.0570 | <i>L. braziliensis</i> | 93   | 1577 | 1669 |
| LbrM22_V2.0570 | <i>L. braziliensis</i> | 66   | 1718 | 1783 |
| LbrM22_V2.0580 | <i>L. braziliensis</i> | 65   | 1    | 65   |
| LbrM22_V2.0590 | <i>L. braziliensis</i> | 382  | 1    | 382  |
| LbrM22_V2.0590 | <i>L. braziliensis</i> | 252  | 405  | 656  |
| LbrM22_V2.0590 | <i>L. braziliensis</i> | 80   | 697  | 776  |
| LbrM22_V2.0590 | <i>L. braziliensis</i> | 48   | 785  | 832  |
| LbrM22_V2.0590 | <i>L. braziliensis</i> | 57   | 913  | 969  |
| LbrM22_V2.0590 | <i>L. braziliensis</i> | 64   | 976  | 1039 |
| LbrM22_V2.0590 | <i>L. braziliensis</i> | 49   | 1086 | 1134 |
| LbrM22_V2.0600 | <i>L. braziliensis</i> | 45   | 113  | 157  |
| LbrM22_V2.0630 | <i>L. braziliensis</i> | 1121 | 1    | 1121 |
| LbrM22_V2.0630 | <i>L. braziliensis</i> | 277  | 1160 | 1436 |
| LbrM22_V2.0630 | <i>L. braziliensis</i> | 56   | 1462 | 1517 |
| LbrM22_V2.0650 | <i>L. braziliensis</i> | 82   | 1    | 82   |
| LbrM22_V2.0650 | <i>L. braziliensis</i> | 72   | 158  | 229  |
| LbrM22_V2.0650 | <i>L. braziliensis</i> | 130  | 499  | 628  |
| LbrM22_V2.0650 | <i>L. braziliensis</i> | 78   | 661  | 738  |
| LbrM22_V2.0650 | <i>L. braziliensis</i> | 155  | 756  | 910  |
| LbrM22_V2.0660 | <i>L. braziliensis</i> | 64   | 1    | 64   |

|                |                        |     |      |      |
|----------------|------------------------|-----|------|------|
| LbrM22_V2.0660 | <i>L. braziliensis</i> | 172 | 167  | 338  |
| LbrM22_V2.0670 | <i>L. braziliensis</i> | 69  | 123  | 191  |
| LbrM22_V2.0680 | <i>L. braziliensis</i> | 42  | 98   | 139  |
| LbrM22_V2.0680 | <i>L. braziliensis</i> | 67  | 241  | 307  |
| LbrM22_V2.0680 | <i>L. braziliensis</i> | 102 | 319  | 420  |
| LbrM22_V2.0680 | <i>L. braziliensis</i> | 141 | 434  | 574  |
| LbrM22_V2.0690 | <i>L. braziliensis</i> | 57  | 1    | 57   |
| LbrM22_V2.0690 | <i>L. braziliensis</i> | 138 | 71   | 208  |
| LbrM22_V2.0690 | <i>L. braziliensis</i> | 161 | 268  | 428  |
| LbrM22_V2.0690 | <i>L. braziliensis</i> | 82  | 433  | 514  |
| LbrM22_V2.0690 | <i>L. braziliensis</i> | 276 | 854  | 1129 |
| LbrM22_V2.0710 | <i>L. braziliensis</i> | 60  | 230  | 289  |
| LbrM22_V2.0740 | <i>L. braziliensis</i> | 78  | 1    | 78   |
| LbrM22_V2.0750 | <i>L. braziliensis</i> | 87  | 340  | 426  |
| LbrM22_V2.0770 | <i>L. braziliensis</i> | 65  | 68   | 132  |
| LbrM22_V2.0770 | <i>L. braziliensis</i> | 94  | 158  | 251  |
| LbrM22_V2.0770 | <i>L. braziliensis</i> | 64  | 275  | 338  |
| LbrM22_V2.0770 | <i>L. braziliensis</i> | 73  | 394  | 466  |
| LbrM22_V2.0770 | <i>L. braziliensis</i> | 101 | 543  | 643  |
| LbrM22_V2.0780 | <i>L. braziliensis</i> | 90  | 1    | 90   |
| LbrM22_V2.0790 | <i>L. braziliensis</i> | 71  | 1    | 71   |
| LbrM22_V2.0790 | <i>L. braziliensis</i> | 189 | 77   | 265  |
| LbrM22_V2.0790 | <i>L. braziliensis</i> | 128 | 597  | 724  |
| LbrM22_V2.0790 | <i>L. braziliensis</i> | 55  | 757  | 811  |
| LbrM22_V2.0800 | <i>L. braziliensis</i> | 171 | 1    | 171  |
| LbrM22_V2.0800 | <i>L. braziliensis</i> | 50  | 199  | 248  |
| LbrM22_V2.0820 | <i>L. braziliensis</i> | 44  | 25   | 68   |
| LbrM22_V2.0820 | <i>L. braziliensis</i> | 73  | 107  | 179  |
| LbrM22_V2.0820 | <i>L. braziliensis</i> | 42  | 231  | 272  |
| LbrM22_V2.0820 | <i>L. braziliensis</i> | 95  | 368  | 462  |
| LbrM22_V2.0820 | <i>L. braziliensis</i> | 45  | 705  | 749  |
| LbrM22_V2.0840 | <i>L. braziliensis</i> | 80  | 426  | 505  |
| LbrM22_V2.0840 | <i>L. braziliensis</i> | 76  | 596  | 671  |
| LbrM22_V2.0840 | <i>L. braziliensis</i> | 76  | 596  | 671  |
| LbrM22_V2.0860 | <i>L. braziliensis</i> | 60  | 43   | 102  |
| LbrM22_V2.0860 | <i>L. braziliensis</i> | 69  | 219  | 287  |
| LbrM22_V2.0860 | <i>L. braziliensis</i> | 68  | 563  | 630  |
| LbrM22_V2.0860 | <i>L. braziliensis</i> | 202 | 665  | 866  |
| LbrM22_V2.0860 | <i>L. braziliensis</i> | 55  | 908  | 962  |
| LbrM22_V2.0860 | <i>L. braziliensis</i> | 82  | 1007 | 1088 |
| LbrM22_V2.0860 | <i>L. braziliensis</i> | 232 | 1095 | 1326 |
| LbrM22_V2.0860 | <i>L. braziliensis</i> | 83  | 1350 | 1432 |
| LbrM22_V2.0870 | <i>L. braziliensis</i> | 69  | 55   | 123  |
| LbrM22_V2.0870 | <i>L. braziliensis</i> | 134 | 154  | 287  |
| LbrM22_V2.0870 | <i>L. braziliensis</i> | 87  | 319  | 405  |
| LbrM22_V2.0870 | <i>L. braziliensis</i> | 251 | 504  | 754  |
| LbrM22_V2.0870 | <i>L. braziliensis</i> | 94  | 775  | 868  |

|                |                        |     |      |      |
|----------------|------------------------|-----|------|------|
| LbrM22_V2.0870 | <i>L. braziliensis</i> | 98  | 909  | 1006 |
| LbrM22_V2.0870 | <i>L. braziliensis</i> | 64  | 1069 | 1132 |
| LbrM22_V2.0870 | <i>L. braziliensis</i> | 65  | 1155 | 1219 |
| LbrM22_V2.0870 | <i>L. braziliensis</i> | 163 | 1294 | 1456 |
| LbrM22_V2.0870 | <i>L. braziliensis</i> | 206 | 1460 | 1665 |
| LbrM22_V2.0870 | <i>L. braziliensis</i> | 67  | 1701 | 1767 |
| LbrM22_V2.0880 | <i>L. braziliensis</i> | 43  | 1    | 43   |
| LbrM22_V2.0880 | <i>L. braziliensis</i> | 50  | 384  | 433  |
| LbrM22_V2.0880 | <i>L. braziliensis</i> | 50  | 384  | 433  |
| LbrM22_V2.0890 | <i>L. braziliensis</i> | 96  | 675  | 770  |
| LbrM22_V2.0890 | <i>L. braziliensis</i> | 63  | 1155 | 1217 |
| LbrM22_V2.0890 | <i>L. braziliensis</i> | 63  | 1155 | 1217 |
| LbrM22_V2.0900 | <i>L. braziliensis</i> | 65  | 21   | 85   |
| LbrM22_V2.0900 | <i>L. braziliensis</i> | 41  | 149  | 189  |
| LbrM22_V2.0900 | <i>L. braziliensis</i> | 47  | 287  | 333  |
| LbrM22_V2.0910 | <i>L. braziliensis</i> | 42  | 216  | 257  |
| LbrM22_V2.0910 | <i>L. braziliensis</i> | 78  | 461  | 538  |
| LbrM22_V2.0910 | <i>L. braziliensis</i> | 78  | 461  | 538  |
| LbrM22_V2.0920 | <i>L. braziliensis</i> | 63  | 132  | 194  |
| LbrM22_V2.0920 | <i>L. braziliensis</i> | 48  | 235  | 282  |
| LbrM22_V2.0920 | <i>L. braziliensis</i> | 48  | 235  | 282  |
| LbrM22_V2.0930 | <i>L. braziliensis</i> | 199 | 20   | 218  |
| LbrM22_V2.0930 | <i>L. braziliensis</i> | 88  | 367  | 454  |
| LbrM22_V2.0930 | <i>L. braziliensis</i> | 93  | 721  | 813  |
| LbrM22_V2.0940 | <i>L. braziliensis</i> | 66  | 122  | 187  |
| LbrM22_V2.0940 | <i>L. braziliensis</i> | 217 | 239  | 455  |
| LbrM22_V2.0940 | <i>L. braziliensis</i> | 84  | 575  | 658  |
| LbrM22_V2.0950 | <i>L. braziliensis</i> | 70  | 208  | 277  |
| LbrM22_V2.0950 | <i>L. braziliensis</i> | 63  | 503  | 565  |
| LbrM22_V2.0950 | <i>L. braziliensis</i> | 157 | 571  | 727  |
| LbrM22_V2.0950 | <i>L. braziliensis</i> | 96  | 759  | 854  |
| LbrM22_V2.0970 | <i>L. braziliensis</i> | 112 | 1    | 112  |
| LbrM22_V2.0970 | <i>L. braziliensis</i> | 343 | 163  | 505  |
| LbrM22_V2.0970 | <i>L. braziliensis</i> | 184 | 512  | 695  |
| LbrM22_V2.0970 | <i>L. braziliensis</i> | 102 | 713  | 814  |
| LbrM22_V2.0980 | <i>L. braziliensis</i> | 57  | 103  | 159  |
| LbrM22_V2.0990 | <i>L. braziliensis</i> | 50  | 170  | 219  |
| LbrM22_V2.0990 | <i>L. braziliensis</i> | 109 | 349  | 457  |
| LbrM22_V2.0990 | <i>L. braziliensis</i> | 128 | 490  | 617  |
| LbrM22_V2.1000 | <i>L. braziliensis</i> | 130 | 77   | 206  |
| LbrM22_V2.1000 | <i>L. braziliensis</i> | 119 | 226  | 344  |
| LbrM22_V2.1000 | <i>L. braziliensis</i> | 127 | 389  | 515  |
| LbrM22_V2.1000 | <i>L. braziliensis</i> | 77  | 524  | 600  |
| LbrM22_V2.1000 | <i>L. braziliensis</i> | 398 | 663  | 1060 |
| LbrM22_V2.1000 | <i>L. braziliensis</i> | 291 | 1097 | 1387 |
| LbrM22_V2.1000 | <i>L. braziliensis</i> | 107 | 1434 | 1540 |
| LbrM22_V2.1000 | <i>L. braziliensis</i> | 156 | 1642 | 1797 |



|                |                        |     |      |      |
|----------------|------------------------|-----|------|------|
| LbrM22_V2.1000 | <i>L. braziliensis</i> | 62  | 1826 | 1887 |
| LbrM22_V2.1000 | <i>L. braziliensis</i> | 112 | 1914 | 2025 |
| LbrM22_V2.1000 | <i>L. braziliensis</i> | 134 | 2032 | 2165 |
| LbrM22_V2.1000 | <i>L. braziliensis</i> | 64  | 2172 | 2235 |
| LbrM22_V2.1000 | <i>L. braziliensis</i> | 111 | 2287 | 2397 |
| LbrM22_V2.1010 | <i>L. braziliensis</i> | 82  | 1    | 82   |
| LbrM22_V2.1010 | <i>L. braziliensis</i> | 88  | 736  | 823  |
| LbrM22_V2.1010 | <i>L. braziliensis</i> | 43  | 855  | 897  |
| LbrM22_V2.1010 | <i>L. braziliensis</i> | 70  | 1150 | 1219 |
| LbrM22_V2.1010 | <i>L. braziliensis</i> | 64  | 2533 | 2596 |
| LbrM22_V2.1010 | <i>L. braziliensis</i> | 63  | 2734 | 2796 |
| LbrM22_V2.1010 | <i>L. braziliensis</i> | 50  | 3456 | 3505 |
| LbrM22_V2.1010 | <i>L. braziliensis</i> | 107 | 3675 | 3781 |
| LbrM22_V2.1010 | <i>L. braziliensis</i> | 51  | 4418 | 4468 |
| LbrM22_V2.1020 | <i>L. braziliensis</i> | 57  | 72   | 128  |
| LbrM22_V2.1050 | <i>L. braziliensis</i> | 47  | 1    | 47   |
| LbrM22_V2.1050 | <i>L. braziliensis</i> | 44  | 174  | 217  |
| LbrM22_V2.1050 | <i>L. braziliensis</i> | 255 | 749  | 1003 |
| LbrM22_V2.1060 | <i>L. braziliensis</i> | 77  | 83   | 159  |
| LbrM22_V2.1060 | <i>L. braziliensis</i> | 53  | 398  | 450  |
| LbrM22_V2.1070 | <i>L. braziliensis</i> | 132 | 119  | 250  |
| LbrM22_V2.1070 | <i>L. braziliensis</i> | 54  | 431  | 484  |
| LbrM22_V2.1070 | <i>L. braziliensis</i> | 88  | 510  | 597  |
| LbrM22_V2.1070 | <i>L. braziliensis</i> | 153 | 626  | 778  |
| LbrM22_V2.1070 | <i>L. braziliensis</i> | 116 | 787  | 902  |
| LbrM22_V2.1080 | <i>L. braziliensis</i> | 48  | 129  | 176  |
| LbrM22_V2.1090 | <i>L. braziliensis</i> | 166 | 1    | 166  |
| LbrM22_V2.1090 | <i>L. braziliensis</i> | 229 | 177  | 405  |
| LbrM22_V2.1090 | <i>L. braziliensis</i> | 232 | 408  | 639  |
| LbrM22_V2.1090 | <i>L. braziliensis</i> | 57  | 714  | 770  |
| LbrM22_V2.1110 | <i>L. braziliensis</i> | 101 | 92   | 192  |
| LbrM22_V2.1110 | <i>L. braziliensis</i> | 44  | 685  | 728  |
| LbrM22_V2.1120 | <i>L. braziliensis</i> | 45  | 1    | 45   |
| LbrM22_V2.1120 | <i>L. braziliensis</i> | 44  | 93   | 136  |
| LbrM22_V2.1120 | <i>L. braziliensis</i> | 62  | 712  | 773  |
| LbrM22_V2.1130 | <i>L. braziliensis</i> | 72  | 255  | 326  |
| LbrM22_V2.1140 | <i>L. braziliensis</i> | 421 | 143  | 563  |
| LbrM22_V2.1140 | <i>L. braziliensis</i> | 277 | 606  | 882  |
| LbrM22_V2.1140 | <i>L. braziliensis</i> | 102 | 916  | 1017 |
| LbrM22_V2.1150 | <i>L. braziliensis</i> | 78  | 45   | 122  |
| LbrM22_V2.1150 | <i>L. braziliensis</i> | 175 | 208  | 382  |
| LbrM22_V2.1160 | <i>L. braziliensis</i> | 46  | 121  | 166  |
| LbrM22_V2.1160 | <i>L. braziliensis</i> | 70  | 187  | 256  |
| LbrM22_V2.1160 | <i>L. braziliensis</i> | 70  | 187  | 256  |
| LbrM22_V2.1170 | <i>L. braziliensis</i> | 53  | 1    | 53   |
| LbrM22_V2.1180 | <i>L. braziliensis</i> | 70  | 49   | 118  |
| LbrM22_V2.1190 | <i>L. braziliensis</i> | 147 | 1    | 147  |

|                |                        |     |      |      |
|----------------|------------------------|-----|------|------|
| LbrM22_V2.1190 | <i>L. braziliensis</i> | 197 | 170  | 366  |
| LbrM22_V2.1190 | <i>L. braziliensis</i> | 56  | 375  | 430  |
| LbrM22_V2.1190 | <i>L. braziliensis</i> | 70  | 467  | 536  |
| LbrM22_V2.1190 | <i>L. braziliensis</i> | 109 | 601  | 709  |
| LbrM22_V2.1190 | <i>L. braziliensis</i> | 104 | 728  | 831  |
| LbrM22_V2.1190 | <i>L. braziliensis</i> | 114 | 913  | 1026 |
| LbrM22_V2.1190 | <i>L. braziliensis</i> | 78  | 1035 | 1112 |
| LbrM22_V2.1210 | <i>L. braziliensis</i> | 44  | 1    | 44   |
| LbrM22_V2.1210 | <i>L. braziliensis</i> | 146 | 280  | 425  |
| LbrM22_V2.1210 | <i>L. braziliensis</i> | 50  | 523  | 572  |
| LbrM22_V2.1210 | <i>L. braziliensis</i> | 92  | 609  | 700  |
| LbrM22_V2.1230 | <i>L. braziliensis</i> | 148 | 254  | 401  |
| LbrM22_V2.1250 | <i>L. braziliensis</i> | 99  | 34   | 132  |
| LbrM22_V2.1250 | <i>L. braziliensis</i> | 225 | 185  | 409  |
| LbrM22_V2.1250 | <i>L. braziliensis</i> | 225 | 185  | 409  |
| LbrM22_V2.1260 | <i>L. braziliensis</i> | 149 | 120  | 268  |
| LbrM22_V2.1270 | <i>L. braziliensis</i> | 79  | 1    | 79   |
| LbrM22_V2.1280 | <i>L. braziliensis</i> | 61  | 1    | 61   |
| LbrM22_V2.1290 | <i>L. braziliensis</i> | 55  | 95   | 149  |
| LbrM22_V2.1320 | <i>L. braziliensis</i> | 53  | 1    | 53   |
| LbrM22_V2.1320 | <i>L. braziliensis</i> | 59  | 86   | 144  |
| LbrM22_V2.1340 | <i>L. braziliensis</i> | 71  | 142  | 212  |
| LbrM22_V2.1350 | <i>L. braziliensis</i> | 48  | 199  | 246  |
| LbrM22_V2.1360 | <i>L. braziliensis</i> | 58  | 1    | 58   |
| LbrM22_V2.1400 | <i>L. braziliensis</i> | 45  | 960  | 1004 |
| LbrM22_V2.1400 | <i>L. braziliensis</i> | 46  | 1038 | 1083 |
| LbrM22_V2.1400 | <i>L. braziliensis</i> | 46  | 1038 | 1083 |
| LbrM22_V2.1420 | <i>L. braziliensis</i> | 40  | 72   | 111  |
| LbrM22_V2.1420 | <i>L. braziliensis</i> | 49  | 127  | 175  |
| LbrM22_V2.1420 | <i>L. braziliensis</i> | 49  | 127  | 175  |
| LbrM22_V2.1440 | <i>L. braziliensis</i> | 44  | 919  | 962  |
| LbrM22_V2.1460 | <i>L. braziliensis</i> | 40  | 72   | 111  |
| LbrM22_V2.1460 | <i>L. braziliensis</i> | 49  | 127  | 175  |
| LbrM22_V2.1460 | <i>L. braziliensis</i> | 49  | 127  | 175  |
| LbrM22_V2.1470 | <i>L. braziliensis</i> | 129 | 54   | 182  |
| LbrM22_V2.1480 | <i>L. braziliensis</i> | 141 | 22   | 162  |
| LbrM22_V2.1480 | <i>L. braziliensis</i> | 87  | 185  | 271  |
| LbrM22_V2.1480 | <i>L. braziliensis</i> | 94  | 282  | 375  |
| LbrM22_V2.1490 | <i>L. braziliensis</i> | 40  | 211  | 250  |
| LbrM22_V2.1490 | <i>L. braziliensis</i> | 67  | 297  | 363  |
| LbrM22_V2.1490 | <i>L. braziliensis</i> | 67  | 297  | 363  |
| LbrM22_V2.1510 | <i>L. braziliensis</i> | 213 | 1    | 213  |
| LbrM22_V2.1510 | <i>L. braziliensis</i> | 68  | 238  | 305  |
| LbrM22_V2.1510 | <i>L. braziliensis</i> | 51  | 560  | 610  |
| LbrM22_V2.1510 | <i>L. braziliensis</i> | 68  | 614  | 681  |
| LbrM22_V2.1520 | <i>L. braziliensis</i> | 75  | 456  | 530  |
| LbrM22_V2.1530 | <i>L. braziliensis</i> | 56  | 1    | 56   |

|                |                        |      |      |      |
|----------------|------------------------|------|------|------|
| LbrM22_V2.1530 | <i>L. braziliensis</i> | 40   | 492  | 531  |
| LbrM22_V2.1530 | <i>L. braziliensis</i> | 42   | 975  | 1016 |
| LbrM22_V2.1530 | <i>L. braziliensis</i> | 50   | 1088 | 1137 |
| LbrM22_V2.1530 | <i>L. braziliensis</i> | 69   | 1423 | 1491 |
| LbrM22_V2.1530 | <i>L. braziliensis</i> | 43   | 2372 | 2414 |
| LbrM22_V2.1540 | <i>L. braziliensis</i> | 55   | 284  | 338  |
| LbrM22_V2.1570 | <i>L. braziliensis</i> | 116  | 36   | 151  |
| LbrM22_V2.1570 | <i>L. braziliensis</i> | 57   | 494  | 550  |
| LbrM22_V2.1570 | <i>L. braziliensis</i> | 57   | 494  | 550  |
| LbrM22_V2.1600 | <i>L. braziliensis</i> | 1384 | 1    | 1384 |
| LbrM22_V2.1610 | <i>L. braziliensis</i> | 80   | 34   | 113  |
| LbrM22_V2.1610 | <i>L. braziliensis</i> | 76   | 204  | 279  |
| LbrM22_V2.1610 | <i>L. braziliensis</i> | 76   | 204  | 279  |
| LbrM22_V2.1620 | <i>L. braziliensis</i> | 298  | 1    | 298  |
| LbrM22_V2.1620 | <i>L. braziliensis</i> | 1692 | 316  | 2007 |
| LbrM23_V2.0060 | <i>L. braziliensis</i> | 126  | 171  | 296  |
| LbrM23_V2.0070 | <i>L. braziliensis</i> | 151  | 23   | 173  |
| LbrM23_V2.0090 | <i>L. braziliensis</i> | 183  | 1    | 183  |
| LbrM23_V2.0090 | <i>L. braziliensis</i> | 60   | 248  | 307  |
| LbrM23_V2.0090 | <i>L. braziliensis</i> | 58   | 309  | 366  |
| LbrM23_V2.0100 | <i>L. braziliensis</i> | 98   | 210  | 307  |
| LbrM23_V2.0130 | <i>L. braziliensis</i> | 49   | 1588 | 1636 |
| LbrM23_V2.0130 | <i>L. braziliensis</i> | 63   | 1705 | 1767 |
| LbrM23_V2.0130 | <i>L. braziliensis</i> | 63   | 1705 | 1767 |
| LbrM23_V2.0190 | <i>L. braziliensis</i> | 88   | 72   | 159  |
| LbrM23_V2.0210 | <i>L. braziliensis</i> | 93   | 33   | 125  |
| LbrM23_V2.0230 | <i>L. braziliensis</i> | 47   | 1    | 47   |
| LbrM23_V2.0230 | <i>L. braziliensis</i> | 67   | 600  | 666  |
| LbrM23_V2.0230 | <i>L. braziliensis</i> | 82   | 862  | 943  |
| LbrM23_V2.0240 | <i>L. braziliensis</i> | 81   | 19   | 99   |
| LbrM23_V2.0250 | <i>L. braziliensis</i> | 132  | 1    | 132  |
| LbrM23_V2.0260 | <i>L. braziliensis</i> | 62   | 124  | 185  |
| LbrM23_V2.0280 | <i>L. braziliensis</i> | 41   | 1    | 41   |
| LbrM23_V2.0280 | <i>L. braziliensis</i> | 49   | 619  | 667  |
| LbrM23_V2.0280 | <i>L. braziliensis</i> | 71   | 877  | 947  |
| LbrM23_V2.0280 | <i>L. braziliensis</i> | 51   | 1258 | 1308 |
| LbrM23_V2.0310 | <i>L. braziliensis</i> | 237  | 1    | 237  |
| LbrM23_V2.0310 | <i>L. braziliensis</i> | 45   | 275  | 319  |
| LbrM23_V2.0310 | <i>L. braziliensis</i> | 209  | 340  | 548  |
| LbrM23_V2.0310 | <i>L. braziliensis</i> | 199  | 581  | 779  |
| LbrM23_V2.0310 | <i>L. braziliensis</i> | 55   | 1102 | 1156 |
| LbrM23_V2.0330 | <i>L. braziliensis</i> | 73   | 98   | 170  |
| LbrM23_V2.0340 | <i>L. braziliensis</i> | 70   | 113  | 182  |
| LbrM23_V2.0340 | <i>L. braziliensis</i> | 77   | 267  | 343  |
| LbrM23_V2.0340 | <i>L. braziliensis</i> | 47   | 429  | 475  |
| LbrM23_V2.0340 | <i>L. braziliensis</i> | 73   | 668  | 740  |
| LbrM23_V2.0340 | <i>L. braziliensis</i> | 87   | 858  | 944  |

|                |                        |     |      |      |
|----------------|------------------------|-----|------|------|
| LbrM23_V2.0340 | <i>L. braziliensis</i> | 67  | 1101 | 1167 |
| LbrM23_V2.0350 | <i>L. braziliensis</i> | 61  | 151  | 211  |
| LbrM23_V2.0370 | <i>L. braziliensis</i> | 97  | 1    | 97   |
| LbrM23_V2.0380 | <i>L. braziliensis</i> | 58  | 1    | 58   |
| LbrM23_V2.0380 | <i>L. braziliensis</i> | 111 | 190  | 300  |
| LbrM23_V2.0390 | <i>L. braziliensis</i> | 48  | 546  | 593  |
| LbrM23_V2.0390 | <i>L. braziliensis</i> | 89  | 692  | 780  |
| LbrM23_V2.0390 | <i>L. braziliensis</i> | 45  | 889  | 933  |
| LbrM23_V2.0390 | <i>L. braziliensis</i> | 50  | 1637 | 1686 |
| LbrM23_V2.0390 | <i>L. braziliensis</i> | 64  | 1702 | 1765 |
| LbrM23_V2.0420 | <i>L. braziliensis</i> | 97  | 465  | 561  |
| LbrM23_V2.0420 | <i>L. braziliensis</i> | 60  | 864  | 923  |
| LbrM23_V2.0420 | <i>L. braziliensis</i> | 60  | 864  | 923  |
| LbrM23_V2.0430 | <i>L. braziliensis</i> | 144 | 39   | 182  |
| LbrM23_V2.0430 | <i>L. braziliensis</i> | 68  | 208  | 275  |
| LbrM23_V2.0430 | <i>L. braziliensis</i> | 86  | 560  | 645  |
| LbrM23_V2.0430 | <i>L. braziliensis</i> | 142 | 691  | 832  |
| LbrM23_V2.0430 | <i>L. braziliensis</i> | 43  | 890  | 932  |
| LbrM23_V2.0430 | <i>L. braziliensis</i> | 53  | 1000 | 1052 |
| LbrM23_V2.0430 | <i>L. braziliensis</i> | 42  | 1057 | 1098 |
| LbrM23_V2.0430 | <i>L. braziliensis</i> | 58  | 1170 | 1227 |
| LbrM23_V2.0430 | <i>L. braziliensis</i> | 186 | 1270 | 1455 |
| LbrM23_V2.0430 | <i>L. braziliensis</i> | 90  | 1696 | 1785 |
| LbrM23_V2.0430 | <i>L. braziliensis</i> | 112 | 1827 | 1938 |
| LbrM23_V2.0440 | <i>L. braziliensis</i> | 296 | 1    | 296  |
| LbrM23_V2.0440 | <i>L. braziliensis</i> | 109 | 459  | 567  |
| LbrM23_V2.0440 | <i>L. braziliensis</i> | 45  | 795  | 839  |
| LbrM23_V2.0450 | <i>L. braziliensis</i> | 76  | 1    | 76   |
| LbrM23_V2.0470 | <i>L. braziliensis</i> | 48  | 142  | 189  |
| LbrM23_V2.0490 | <i>L. braziliensis</i> | 53  | 94   | 146  |
| LbrM23_V2.0500 | <i>L. braziliensis</i> | 61  | 1    | 61   |
| LbrM23_V2.0500 | <i>L. braziliensis</i> | 240 | 105  | 344  |
| LbrM23_V2.0510 | <i>L. braziliensis</i> | 147 | 1    | 147  |
| LbrM23_V2.0510 | <i>L. braziliensis</i> | 61  | 167  | 227  |
| LbrM23_V2.0510 | <i>L. braziliensis</i> | 185 | 260  | 444  |
| LbrM23_V2.0510 | <i>L. braziliensis</i> | 197 | 451  | 647  |
| LbrM23_V2.0510 | <i>L. braziliensis</i> | 229 | 667  | 895  |
| LbrM23_V2.0510 | <i>L. braziliensis</i> | 287 | 947  | 1233 |
| LbrM23_V2.0510 | <i>L. braziliensis</i> | 101 | 1304 | 1404 |
| LbrM23_V2.0520 | <i>L. braziliensis</i> | 47  | 93   | 139  |
| LbrM23_V2.0550 | <i>L. braziliensis</i> | 105 | 66   | 170  |
| LbrM23_V2.0570 | <i>L. braziliensis</i> | 53  | 233  | 285  |
| LbrM23_V2.0580 | <i>L. braziliensis</i> | 59  | 1    | 59   |
| LbrM23_V2.0590 | <i>L. braziliensis</i> | 97  | 80   | 176  |
| LbrM23_V2.0600 | <i>L. braziliensis</i> | 87  | 263  | 349  |
| LbrM23_V2.0600 | <i>L. braziliensis</i> | 52  | 586  | 637  |
| LbrM23_V2.0600 | <i>L. braziliensis</i> | 92  | 759  | 850  |

|                |                        |     |      |      |
|----------------|------------------------|-----|------|------|
| LbrM23_V2.0600 | <i>L. braziliensis</i> | 120 | 946  | 1065 |
| LbrM23_V2.0610 | <i>L. braziliensis</i> | 44  | 148  | 191  |
| LbrM23_V2.0610 | <i>L. braziliensis</i> | 423 | 429  | 851  |
| LbrM23_V2.0620 | <i>L. braziliensis</i> | 56  | 230  | 285  |
| LbrM23_V2.0630 | <i>L. braziliensis</i> | 47  | 1    | 47   |
| LbrM23_V2.0630 | <i>L. braziliensis</i> | 196 | 126  | 321  |
| LbrM23_V2.0640 | <i>L. braziliensis</i> | 70  | 153  | 222  |
| LbrM23_V2.0650 | <i>L. braziliensis</i> | 59  | 204  | 262  |
| LbrM23_V2.0650 | <i>L. braziliensis</i> | 60  | 533  | 592  |
| LbrM23_V2.0650 | <i>L. braziliensis</i> | 60  | 533  | 592  |
| LbrM23_V2.0660 | <i>L. braziliensis</i> | 394 | 177  | 570  |
| LbrM23_V2.0660 | <i>L. braziliensis</i> | 124 | 609  | 732  |
| LbrM23_V2.0660 | <i>L. braziliensis</i> | 68  | 909  | 976  |
| LbrM23_V2.0660 | <i>L. braziliensis</i> | 109 | 1060 | 1168 |
| LbrM23_V2.0660 | <i>L. braziliensis</i> | 47  | 1635 | 1681 |
| LbrM23_V2.0660 | <i>L. braziliensis</i> | 60  | 1689 | 1748 |
| LbrM23_V2.0660 | <i>L. braziliensis</i> | 82  | 2193 | 2274 |
| LbrM23_V2.0660 | <i>L. braziliensis</i> | 47  | 2301 | 2347 |
| LbrM23_V2.0660 | <i>L. braziliensis</i> | 68  | 2353 | 2420 |
| LbrM23_V2.0660 | <i>L. braziliensis</i> | 160 | 2438 | 2597 |
| LbrM23_V2.0660 | <i>L. braziliensis</i> | 835 | 2606 | 3440 |
| LbrM23_V2.0710 | <i>L. braziliensis</i> | 46  | 471  | 516  |
| LbrM23_V2.0710 | <i>L. braziliensis</i> | 171 | 550  | 720  |
| LbrM23_V2.0710 | <i>L. braziliensis</i> | 171 | 550  | 720  |
| LbrM23_V2.0720 | <i>L. braziliensis</i> | 102 | 1    | 102  |
| LbrM23_V2.0720 | <i>L. braziliensis</i> | 65  | 174  | 238  |
| LbrM23_V2.0720 | <i>L. braziliensis</i> | 195 | 273  | 467  |
| LbrM23_V2.0720 | <i>L. braziliensis</i> | 59  | 508  | 566  |
| LbrM23_V2.0720 | <i>L. braziliensis</i> | 56  | 737  | 792  |
| LbrM23_V2.0720 | <i>L. braziliensis</i> | 128 | 836  | 963  |
| LbrM23_V2.0730 | <i>L. braziliensis</i> | 57  | 1    | 57   |
| LbrM23_V2.0730 | <i>L. braziliensis</i> | 76  | 83   | 158  |
| LbrM23_V2.0730 | <i>L. braziliensis</i> | 75  | 239  | 313  |
| LbrM23_V2.0740 | <i>L. braziliensis</i> | 47  | 1    | 47   |
| LbrM23_V2.0740 | <i>L. braziliensis</i> | 67  | 600  | 666  |
| LbrM23_V2.0740 | <i>L. braziliensis</i> | 58  | 876  | 933  |
| LbrM23_V2.0750 | <i>L. braziliensis</i> | 53  | 34   | 86   |
| LbrM23_V2.0760 | <i>L. braziliensis</i> | 43  | 39   | 81   |
| LbrM23_V2.0760 | <i>L. braziliensis</i> | 132 | 220  | 351  |
| LbrM23_V2.0760 | <i>L. braziliensis</i> | 99  | 512  | 610  |
| LbrM23_V2.0760 | <i>L. braziliensis</i> | 66  | 626  | 691  |
| LbrM23_V2.0780 | <i>L. braziliensis</i> | 109 | 1    | 109  |
| LbrM23_V2.0780 | <i>L. braziliensis</i> | 65  | 470  | 534  |
| LbrM23_V2.0790 | <i>L. braziliensis</i> | 50  | 58   | 107  |
| LbrM23_V2.0790 | <i>L. braziliensis</i> | 75  | 113  | 187  |
| LbrM23_V2.0790 | <i>L. braziliensis</i> | 42  | 234  | 275  |
| LbrM23_V2.0790 | <i>L. braziliensis</i> | 47  | 516  | 562  |

|                |                        |     |      |      |
|----------------|------------------------|-----|------|------|
| LbrM23_V2.0790 | <i>L. braziliensis</i> | 62  | 642  | 703  |
| LbrM23_V2.0800 | <i>L. braziliensis</i> | 50  | 1    | 50   |
| LbrM23_V2.0810 | <i>L. braziliensis</i> | 72  | 1    | 72   |
| LbrM23_V2.0810 | <i>L. braziliensis</i> | 64  | 152  | 215  |
| LbrM23_V2.0810 | <i>L. braziliensis</i> | 240 | 299  | 538  |
| LbrM23_V2.0810 | <i>L. braziliensis</i> | 43  | 543  | 585  |
| LbrM23_V2.0820 | <i>L. braziliensis</i> | 140 | 1    | 140  |
| LbrM23_V2.0820 | <i>L. braziliensis</i> | 277 | 205  | 481  |
| LbrM23_V2.0820 | <i>L. braziliensis</i> | 86  | 496  | 581  |
| LbrM23_V2.0830 | <i>L. braziliensis</i> | 89  | 13   | 101  |
| LbrM23_V2.0830 | <i>L. braziliensis</i> | 56  | 219  | 274  |
| LbrM23_V2.0830 | <i>L. braziliensis</i> | 55  | 354  | 408  |
| LbrM23_V2.0860 | <i>L. braziliensis</i> | 189 | 28   | 216  |
| LbrM23_V2.0860 | <i>L. braziliensis</i> | 58  | 236  | 293  |
| LbrM23_V2.0860 | <i>L. braziliensis</i> | 137 | 320  | 456  |
| LbrM23_V2.0860 | <i>L. braziliensis</i> | 200 | 567  | 766  |
| LbrM23_V2.0860 | <i>L. braziliensis</i> | 200 | 847  | 1046 |
| LbrM23_V2.0860 | <i>L. braziliensis</i> | 49  | 1096 | 1144 |
| LbrM23_V2.0860 | <i>L. braziliensis</i> | 53  | 1198 | 1250 |
| LbrM23_V2.0870 | <i>L. braziliensis</i> | 45  | 1    | 45   |
| LbrM23_V2.0870 | <i>L. braziliensis</i> | 154 | 96   | 249  |
| LbrM23_V2.0870 | <i>L. braziliensis</i> | 146 | 527  | 672  |
| LbrM23_V2.0870 | <i>L. braziliensis</i> | 73  | 682  | 754  |
| LbrM23_V2.0890 | <i>L. braziliensis</i> | 81  | 1    | 81   |
| LbrM23_V2.0890 | <i>L. braziliensis</i> | 67  | 146  | 212  |
| LbrM23_V2.0910 | <i>L. braziliensis</i> | 128 | 57   | 184  |
| LbrM23_V2.0920 | <i>L. braziliensis</i> | 139 | 559  | 697  |
| LbrM23_V2.0920 | <i>L. braziliensis</i> | 86  | 1099 | 1184 |
| LbrM23_V2.0930 | <i>L. braziliensis</i> | 57  | 42   | 98   |
| LbrM23_V2.0930 | <i>L. braziliensis</i> | 55  | 362  | 416  |
| LbrM23_V2.0930 | <i>L. braziliensis</i> | 55  | 362  | 416  |
| LbrM23_V2.0950 | <i>L. braziliensis</i> | 163 | 1    | 163  |
| LbrM23_V2.0950 | <i>L. braziliensis</i> | 107 | 202  | 308  |
| LbrM23_V2.0950 | <i>L. braziliensis</i> | 143 | 314  | 456  |
| LbrM23_V2.0950 | <i>L. braziliensis</i> | 42  | 500  | 541  |
| LbrM23_V2.0950 | <i>L. braziliensis</i> | 91  | 583  | 673  |
| LbrM23_V2.0950 | <i>L. braziliensis</i> | 210 | 710  | 919  |
| LbrM23_V2.0960 | <i>L. braziliensis</i> | 71  | 90   | 160  |
| LbrM23_V2.0960 | <i>L. braziliensis</i> | 64  | 258  | 321  |
| LbrM23_V2.0960 | <i>L. braziliensis</i> | 115 | 468  | 582  |
| LbrM23_V2.0960 | <i>L. braziliensis</i> | 100 | 686  | 785  |
| LbrM23_V2.1010 | <i>L. braziliensis</i> | 63  | 1    | 63   |
| LbrM23_V2.1010 | <i>L. braziliensis</i> | 162 | 129  | 290  |
| LbrM23_V2.1010 | <i>L. braziliensis</i> | 45  | 361  | 405  |
| LbrM23_V2.1010 | <i>L. braziliensis</i> | 111 | 408  | 518  |
| LbrM23_V2.1010 | <i>L. braziliensis</i> | 43  | 558  | 600  |
| LbrM23_V2.1010 | <i>L. braziliensis</i> | 202 | 649  | 850  |

|                |                        |     |      |      |
|----------------|------------------------|-----|------|------|
| LbrM23_V2.1010 | <i>L. braziliensis</i> | 132 | 852  | 983  |
| LbrM23_V2.1010 | <i>L. braziliensis</i> | 160 | 996  | 1155 |
| LbrM23_V2.1010 | <i>L. braziliensis</i> | 73  | 1184 | 1256 |
| LbrM23_V2.1010 | <i>L. braziliensis</i> | 57  | 1266 | 1322 |
| LbrM23_V2.1010 | <i>L. braziliensis</i> | 100 | 1348 | 1447 |
| LbrM23_V2.1010 | <i>L. braziliensis</i> | 77  | 1470 | 1546 |
| LbrM23_V2.1010 | <i>L. braziliensis</i> | 42  | 1570 | 1611 |
| LbrM23_V2.1010 | <i>L. braziliensis</i> | 72  | 1687 | 1758 |
| LbrM23_V2.1010 | <i>L. braziliensis</i> | 92  | 1943 | 2034 |
| LbrM23_V2.1010 | <i>L. braziliensis</i> | 72  | 2067 | 2138 |
| LbrM23_V2.1010 | <i>L. braziliensis</i> | 57  | 2221 | 2277 |
| LbrM23_V2.1010 | <i>L. braziliensis</i> | 50  | 2380 | 2429 |
| LbrM23_V2.1010 | <i>L. braziliensis</i> | 261 | 2489 | 2749 |
| LbrM23_V2.1030 | <i>L. braziliensis</i> | 47  | 74   | 120  |
| LbrM23_V2.1040 | <i>L. braziliensis</i> | 101 | 218  | 318  |
| LbrM23_V2.1050 | <i>L. braziliensis</i> | 114 | 101  | 214  |
| LbrM23_V2.1050 | <i>L. braziliensis</i> | 88  | 298  | 385  |
| LbrM23_V2.1050 | <i>L. braziliensis</i> | 88  | 298  | 385  |
| LbrM23_V2.1060 | <i>L. braziliensis</i> | 60  | 152  | 211  |
| LbrM23_V2.1070 | <i>L. braziliensis</i> | 68  | 128  | 195  |
| LbrM23_V2.1070 | <i>L. braziliensis</i> | 159 | 251  | 409  |
| LbrM23_V2.1070 | <i>L. braziliensis</i> | 119 | 446  | 564  |
| LbrM23_V2.1070 | <i>L. braziliensis</i> | 155 | 595  | 749  |
| LbrM23_V2.1080 | <i>L. braziliensis</i> | 61  | 50   | 110  |
| LbrM23_V2.1080 | <i>L. braziliensis</i> | 76  | 116  | 191  |
| LbrM23_V2.1080 | <i>L. braziliensis</i> | 76  | 116  | 191  |
| LbrM23_V2.1090 | <i>L. braziliensis</i> | 47  | 79   | 125  |
| LbrM23_V2.1090 | <i>L. braziliensis</i> | 59  | 214  | 272  |
| LbrM23_V2.1090 | <i>L. braziliensis</i> | 61  | 510  | 570  |
| LbrM23_V2.1090 | <i>L. braziliensis</i> | 44  | 622  | 665  |
| LbrM23_V2.1090 | <i>L. braziliensis</i> | 302 | 799  | 1100 |
| LbrM23_V2.1100 | <i>L. braziliensis</i> | 100 | 1    | 100  |
| LbrM23_V2.1120 | <i>L. braziliensis</i> | 169 | 1    | 169  |
| LbrM23_V2.1130 | <i>L. braziliensis</i> | 81  | 180  | 260  |
| LbrM23_V2.1130 | <i>L. braziliensis</i> | 118 | 325  | 442  |
| LbrM23_V2.1130 | <i>L. braziliensis</i> | 101 | 457  | 557  |
| LbrM23_V2.1140 | <i>L. braziliensis</i> | 118 | 20   | 137  |
| LbrM23_V2.1140 | <i>L. braziliensis</i> | 48  | 170  | 217  |
| LbrM23_V2.1140 | <i>L. braziliensis</i> | 126 | 234  | 359  |
| LbrM23_V2.1140 | <i>L. braziliensis</i> | 190 | 378  | 567  |
| LbrM23_V2.1140 | <i>L. braziliensis</i> | 52  | 641  | 692  |
| LbrM23_V2.1160 | <i>L. braziliensis</i> | 48  | 4    | 51   |
| LbrM23_V2.1160 | <i>L. braziliensis</i> | 73  | 81   | 153  |
| LbrM23_V2.1160 | <i>L. braziliensis</i> | 54  | 298  | 351  |
| LbrM23_V2.1170 | <i>L. braziliensis</i> | 62  | 243  | 304  |
| LbrM23_V2.1180 | <i>L. braziliensis</i> | 100 | 1    | 100  |
| LbrM23_V2.1180 | <i>L. braziliensis</i> | 61  | 140  | 200  |

|                |                        |     |      |      |
|----------------|------------------------|-----|------|------|
| LbrM23_V2.1180 | <i>L. braziliensis</i> | 40  | 223  | 262  |
| LbrM23_V2.1200 | <i>L. braziliensis</i> | 65  | 494  | 558  |
| LbrM23_V2.1210 | <i>L. braziliensis</i> | 125 | 184  | 308  |
| LbrM23_V2.1210 | <i>L. braziliensis</i> | 59  | 356  | 414  |
| LbrM23_V2.1220 | <i>L. braziliensis</i> | 156 | 22   | 177  |
| LbrM23_V2.1220 | <i>L. braziliensis</i> | 362 | 222  | 583  |
| LbrM23_V2.1220 | <i>L. braziliensis</i> | 83  | 773  | 855  |
| LbrM23_V2.1220 | <i>L. braziliensis</i> | 447 | 904  | 1350 |
| LbrM23_V2.1230 | <i>L. braziliensis</i> | 87  | 1    | 87   |
| LbrM23_V2.1230 | <i>L. braziliensis</i> | 230 | 121  | 350  |
| LbrM23_V2.1230 | <i>L. braziliensis</i> | 53  | 388  | 440  |
| LbrM23_V2.1230 | <i>L. braziliensis</i> | 49  | 457  | 505  |
| LbrM23_V2.1240 | <i>L. braziliensis</i> | 79  | 210  | 288  |
| LbrM23_V2.1260 | <i>L. braziliensis</i> | 133 | 378  | 510  |
| LbrM23_V2.1270 | <i>L. braziliensis</i> | 61  | 1    | 61   |
| LbrM23_V2.1300 | <i>L. braziliensis</i> | 78  | 51   | 128  |
| LbrM23_V2.1340 | <i>L. braziliensis</i> | 149 | 58   | 206  |
| LbrM23_V2.1340 | <i>L. braziliensis</i> | 88  | 270  | 357  |
| LbrM23_V2.1340 | <i>L. braziliensis</i> | 265 | 451  | 715  |
| LbrM23_V2.1350 | <i>L. braziliensis</i> | 204 | 26   | 229  |
| LbrM23_V2.1350 | <i>L. braziliensis</i> | 51  | 351  | 401  |
| LbrM23_V2.1350 | <i>L. braziliensis</i> | 42  | 438  | 479  |
| LbrM23_V2.1350 | <i>L. braziliensis</i> | 197 | 717  | 913  |
| LbrM23_V2.1350 | <i>L. braziliensis</i> | 63  | 1070 | 1132 |
| LbrM23_V2.1360 | <i>L. braziliensis</i> | 45  | 91   | 135  |
| LbrM23_V2.1360 | <i>L. braziliensis</i> | 50  | 1024 | 1073 |
| LbrM23_V2.1360 | <i>L. braziliensis</i> | 75  | 1121 | 1195 |
| LbrM23_V2.1360 | <i>L. braziliensis</i> | 84  | 1222 | 1305 |
| LbrM23_V2.1370 | <i>L. braziliensis</i> | 269 | 1    | 269  |
| LbrM23_V2.1380 | <i>L. braziliensis</i> | 180 | 106  | 285  |
| LbrM23_V2.1390 | <i>L. braziliensis</i> | 51  | 127  | 177  |
| LbrM23_V2.1390 | <i>L. braziliensis</i> | 280 | 509  | 788  |
| LbrM23_V2.1390 | <i>L. braziliensis</i> | 162 | 848  | 1009 |
| LbrM23_V2.1400 | <i>L. braziliensis</i> | 128 | 1    | 128  |
| LbrM23_V2.1400 | <i>L. braziliensis</i> | 74  | 136  | 209  |
| LbrM23_V2.1400 | <i>L. braziliensis</i> | 45  | 330  | 374  |
| LbrM23_V2.1400 | <i>L. braziliensis</i> | 51  | 431  | 481  |
| LbrM23_V2.1400 | <i>L. braziliensis</i> | 154 | 483  | 636  |
| LbrM23_V2.1400 | <i>L. braziliensis</i> | 43  | 1052 | 1094 |
| LbrM23_V2.1410 | <i>L. braziliensis</i> | 135 | 1    | 135  |
| LbrM23_V2.1410 | <i>L. braziliensis</i> | 194 | 151  | 344  |
| LbrM23_V2.1410 | <i>L. braziliensis</i> | 250 | 348  | 597  |
| LbrM23_V2.1410 | <i>L. braziliensis</i> | 49  | 599  | 647  |
| LbrM23_V2.1430 | <i>L. braziliensis</i> | 99  | 25   | 123  |
| LbrM23_V2.1430 | <i>L. braziliensis</i> | 61  | 257  | 317  |
| LbrM23_V2.1430 | <i>L. braziliensis</i> | 107 | 3516 | 3622 |
| LbrM23_V2.1430 | <i>L. braziliensis</i> | 58  | 3729 | 3786 |



|                |                        |     |      |      |
|----------------|------------------------|-----|------|------|
| LbrM23_V2.1430 | <i>L. braziliensis</i> | 76  | 4025 | 4100 |
| LbrM23_V2.1450 | <i>L. braziliensis</i> | 57  | 1    | 57   |
| LbrM23_V2.1450 | <i>L. braziliensis</i> | 56  | 228  | 283  |
| LbrM23_V2.1450 | <i>L. braziliensis</i> | 110 | 367  | 476  |
| LbrM23_V2.1450 | <i>L. braziliensis</i> | 41  | 482  | 522  |
| LbrM23_V2.1450 | <i>L. braziliensis</i> | 292 | 562  | 853  |
| LbrM23_V2.1450 | <i>L. braziliensis</i> | 47  | 927  | 973  |
| LbrM23_V2.1450 | <i>L. braziliensis</i> | 57  | 1006 | 1062 |
| LbrM23_V2.1450 | <i>L. braziliensis</i> | 218 | 1125 | 1342 |
| LbrM23_V2.1450 | <i>L. braziliensis</i> | 127 | 1369 | 1495 |
| LbrM23_V2.1450 | <i>L. braziliensis</i> | 84  | 1564 | 1647 |
| LbrM23_V2.1450 | <i>L. braziliensis</i> | 140 | 1820 | 1959 |
| LbrM23_V2.1450 | <i>L. braziliensis</i> | 42  | 1975 | 2016 |
| LbrM23_V2.1450 | <i>L. braziliensis</i> | 150 | 2615 | 2764 |
| LbrM23_V2.1460 | <i>L. braziliensis</i> | 67  | 55   | 121  |
| LbrM23_V2.1460 | <i>L. braziliensis</i> | 40  | 240  | 279  |
| LbrM23_V2.1460 | <i>L. braziliensis</i> | 40  | 240  | 279  |
| LbrM23_V2.1480 | <i>L. braziliensis</i> | 74  | 1    | 74   |
| LbrM23_V2.1480 | <i>L. braziliensis</i> | 42  | 115  | 156  |
| LbrM23_V2.1480 | <i>L. braziliensis</i> | 156 | 259  | 414  |
| LbrM23_V2.1500 | <i>L. braziliensis</i> | 321 | 1    | 321  |
| LbrM23_V2.1500 | <i>L. braziliensis</i> | 535 | 336  | 870  |
| LbrM23_V2.1500 | <i>L. braziliensis</i> | 334 | 879  | 1212 |
| LbrM23_V2.1500 | <i>L. braziliensis</i> | 165 | 1782 | 1946 |
| LbrM23_V2.1550 | <i>L. braziliensis</i> | 136 | 86   | 221  |
| LbrM23_V2.1560 | <i>L. braziliensis</i> | 193 | 177  | 369  |
| LbrM23_V2.1570 | <i>L. braziliensis</i> | 209 | 28   | 236  |
| LbrM23_V2.1570 | <i>L. braziliensis</i> | 273 | 258  | 530  |
| LbrM23_V2.1580 | <i>L. braziliensis</i> | 66  | 1    | 66   |
| LbrM23_V2.1610 | <i>L. braziliensis</i> | 59  | 76   | 134  |
| LbrM23_V2.1620 | <i>L. braziliensis</i> | 42  | 102  | 143  |
| LbrM23_V2.1630 | <i>L. braziliensis</i> | 75  | 1    | 75   |
| LbrM23_V2.1630 | <i>L. braziliensis</i> | 140 | 117  | 256  |
| LbrM23_V2.1630 | <i>L. braziliensis</i> | 43  | 313  | 355  |
| LbrM23_V2.1640 | <i>L. braziliensis</i> | 186 | 24   | 209  |
| LbrM23_V2.1650 | <i>L. braziliensis</i> | 53  | 1    | 53   |
| LbrM23_V2.1650 | <i>L. braziliensis</i> | 85  | 98   | 182  |
| LbrM23_V2.1650 | <i>L. braziliensis</i> | 85  | 98   | 182  |
| LbrM23_V2.1660 | <i>L. braziliensis</i> | 47  | 28   | 74   |
| LbrM23_V2.1660 | <i>L. braziliensis</i> | 40  | 120  | 159  |
| LbrM23_V2.1660 | <i>L. braziliensis</i> | 92  | 161  | 252  |
| LbrM23_V2.1660 | <i>L. braziliensis</i> | 59  | 337  | 395  |
| LbrM23_V2.1660 | <i>L. braziliensis</i> | 75  | 425  | 499  |
| LbrM23_V2.1660 | <i>L. braziliensis</i> | 50  | 532  | 581  |
| LbrM23_V2.1680 | <i>L. braziliensis</i> | 59  | 1    | 59   |
| LbrM23_V2.1690 | <i>L. braziliensis</i> | 40  | 13   | 52   |
| LbrM23_V2.1690 | <i>L. braziliensis</i> | 413 | 78   | 490  |

|                |                        |     |      |      |
|----------------|------------------------|-----|------|------|
| LbrM23_V2.1710 | <i>L. braziliensis</i> | 81  | 150  | 230  |
| LbrM23_V2.1740 | <i>L. braziliensis</i> | 50  | 421  | 470  |
| LbrM23_V2.1760 | <i>L. braziliensis</i> | 53  | 32   | 84   |
| LbrM23_V2.1770 | <i>L. braziliensis</i> | 50  | 40   | 89   |
| LbrM23_V2.1770 | <i>L. braziliensis</i> | 51  | 299  | 349  |
| LbrM23_V2.1770 | <i>L. braziliensis</i> | 51  | 299  | 349  |
| LbrM23_V2.1800 | <i>L. braziliensis</i> | 51  | 77   | 127  |
| LbrM23_V2.1830 | <i>L. braziliensis</i> | 43  | 21   | 63   |
| LbrM23_V2.1840 | <i>L. braziliensis</i> | 46  | 1    | 46   |
| LbrM23_V2.1840 | <i>L. braziliensis</i> | 42  | 78   | 119  |
| LbrM23_V2.1840 | <i>L. braziliensis</i> | 60  | 340  | 399  |
| LbrM23_V2.1840 | <i>L. braziliensis</i> | 174 | 456  | 629  |
| LbrM23_V2.1840 | <i>L. braziliensis</i> | 142 | 699  | 840  |
| LbrM23_V2.1850 | <i>L. braziliensis</i> | 166 | 16   | 181  |
| LbrM23_V2.1850 | <i>L. braziliensis</i> | 58  | 222  | 279  |
| LbrM23_V2.1850 | <i>L. braziliensis</i> | 97  | 311  | 407  |
| LbrM23_V2.1850 | <i>L. braziliensis</i> | 152 | 446  | 597  |
| LbrM23_V2.1850 | <i>L. braziliensis</i> | 42  | 864  | 905  |
| LbrM23_V2.1850 | <i>L. braziliensis</i> | 99  | 968  | 1066 |
| LbrM23_V2.1850 | <i>L. braziliensis</i> | 87  | 1230 | 1316 |
| LbrM23_V2.1850 | <i>L. braziliensis</i> | 187 | 1469 | 1655 |
| LbrM23_V2.1850 | <i>L. braziliensis</i> | 46  | 1795 | 1840 |
| LbrM23_V2.1850 | <i>L. braziliensis</i> | 75  | 1860 | 1934 |
| LbrM23_V2.1850 | <i>L. braziliensis</i> | 48  | 1937 | 1984 |
| LbrM23_V2.1860 | <i>L. braziliensis</i> | 108 | 1    | 108  |
| LbrM23_V2.1860 | <i>L. braziliensis</i> | 50  | 189  | 238  |
| LbrM23_V2.1860 | <i>L. braziliensis</i> | 41  | 546  | 586  |
| LbrM23_V2.1860 | <i>L. braziliensis</i> | 207 | 591  | 797  |
| LbrM23_V2.1860 | <i>L. braziliensis</i> | 289 | 915  | 1203 |
| LbrM23_V2.1870 | <i>L. braziliensis</i> | 448 | 1    | 448  |
| LbrM23_V2.1870 | <i>L. braziliensis</i> | 147 | 570  | 716  |
| LbrM23_V2.1870 | <i>L. braziliensis</i> | 179 | 735  | 913  |
| LbrM23_V2.1880 | <i>L. braziliensis</i> | 93  | 1    | 93   |
| LbrM23_V2.1880 | <i>L. braziliensis</i> | 92  | 119  | 210  |
| LbrM23_V2.1880 | <i>L. braziliensis</i> | 155 | 331  | 485  |
| LbrM23_V2.1880 | <i>L. braziliensis</i> | 61  | 616  | 676  |
| LbrM23_V2.1880 | <i>L. braziliensis</i> | 201 | 684  | 884  |
| LbrM23_V2.1890 | <i>L. braziliensis</i> | 44  | 137  | 180  |
| LbrM23_V2.1890 | <i>L. braziliensis</i> | 42  | 617  | 658  |
| LbrM23_V2.1890 | <i>L. braziliensis</i> | 41  | 854  | 894  |
| LbrM23_V2.1900 | <i>L. braziliensis</i> | 116 | 78   | 193  |
| LbrM23_V2.1900 | <i>L. braziliensis</i> | 40  | 546  | 585  |
| LbrM23_V2.1900 | <i>L. braziliensis</i> | 130 | 782  | 911  |
| LbrM23_V2.1920 | <i>L. braziliensis</i> | 90  | 52   | 141  |
| LbrM23_V2.1930 | <i>L. braziliensis</i> | 154 | 1    | 154  |
| LbrM23_V2.1930 | <i>L. braziliensis</i> | 50  | 156  | 205  |
| LbrM23_V2.1930 | <i>L. braziliensis</i> | 66  | 229  | 294  |

|                |                        |     |      |      |
|----------------|------------------------|-----|------|------|
| LbrM23_V2.1930 | <i>L. braziliensis</i> | 47  | 428  | 474  |
| LbrM23_V2.1940 | <i>L. braziliensis</i> | 64  | 61   | 124  |
| LbrM23_V2.1960 | <i>L. braziliensis</i> | 145 | 1    | 145  |
| LbrM23_V2.1960 | <i>L. braziliensis</i> | 76  | 360  | 435  |
| LbrM23_V2.1960 | <i>L. braziliensis</i> | 64  | 521  | 584  |
| LbrM23_V2.1960 | <i>L. braziliensis</i> | 129 | 593  | 721  |
| LbrM24_V2.0010 | <i>L. braziliensis</i> | 43  | 37   | 79   |
| LbrM24_V2.0020 | <i>L. braziliensis</i> | 189 | 298  | 486  |
| LbrM24_V2.0030 | <i>L. braziliensis</i> | 51  | 1    | 51   |
| LbrM24_V2.0030 | <i>L. braziliensis</i> | 53  | 114  | 166  |
| LbrM24_V2.0060 | <i>L. braziliensis</i> | 61  | 339  | 399  |
| LbrM24_V2.0070 | <i>L. braziliensis</i> | 86  | 209  | 294  |
| LbrM24_V2.0070 | <i>L. braziliensis</i> | 53  | 387  | 439  |
| LbrM24_V2.0100 | <i>L. braziliensis</i> | 67  | 1    | 67   |
| LbrM24_V2.0130 | <i>L. braziliensis</i> | 40  | 1    | 40   |
| LbrM24_V2.0150 | <i>L. braziliensis</i> | 98  | 1    | 98   |
| LbrM24_V2.0150 | <i>L. braziliensis</i> | 69  | 221  | 289  |
| LbrM24_V2.0170 | <i>L. braziliensis</i> | 45  | 296  | 340  |
| LbrM24_V2.0180 | <i>L. braziliensis</i> | 47  | 13   | 59   |
| LbrM24_V2.0180 | <i>L. braziliensis</i> | 138 | 675  | 812  |
| LbrM24_V2.0190 | <i>L. braziliensis</i> | 84  | 50   | 133  |
| LbrM24_V2.0200 | <i>L. braziliensis</i> | 191 | 1    | 191  |
| LbrM24_V2.0200 | <i>L. braziliensis</i> | 88  | 224  | 311  |
| LbrM24_V2.0220 | <i>L. braziliensis</i> | 77  | 1    | 77   |
| LbrM24_V2.0230 | <i>L. braziliensis</i> | 45  | 178  | 222  |
| LbrM24_V2.0240 | <i>L. braziliensis</i> | 49  | 348  | 396  |
| LbrM24_V2.0240 | <i>L. braziliensis</i> | 49  | 499  | 547  |
| LbrM24_V2.0240 | <i>L. braziliensis</i> | 49  | 558  | 606  |
| LbrM24_V2.0260 | <i>L. braziliensis</i> | 65  | 1    | 65   |
| LbrM24_V2.0270 | <i>L. braziliensis</i> | 172 | 126  | 297  |
| LbrM24_V2.0270 | <i>L. braziliensis</i> | 42  | 330  | 371  |
| LbrM24_V2.0270 | <i>L. braziliensis</i> | 95  | 431  | 525  |
| LbrM24_V2.0270 | <i>L. braziliensis</i> | 53  | 833  | 885  |
| LbrM24_V2.0270 | <i>L. braziliensis</i> | 96  | 911  | 1006 |
| LbrM24_V2.0270 | <i>L. braziliensis</i> | 167 | 1013 | 1179 |
| LbrM24_V2.0280 | <i>L. braziliensis</i> | 70  | 101  | 170  |
| LbrM24_V2.0280 | <i>L. braziliensis</i> | 47  | 190  | 236  |
| LbrM24_V2.0280 | <i>L. braziliensis</i> | 47  | 190  | 236  |
| LbrM24_V2.0290 | <i>L. braziliensis</i> | 52  | 1    | 52   |
| LbrM24_V2.0290 | <i>L. braziliensis</i> | 78  | 62   | 139  |
| LbrM24_V2.0290 | <i>L. braziliensis</i> | 78  | 62   | 139  |
| LbrM24_V2.0300 | <i>L. braziliensis</i> | 41  | 485  | 525  |
| LbrM24_V2.0300 | <i>L. braziliensis</i> | 96  | 676  | 771  |
| LbrM24_V2.0310 | <i>L. braziliensis</i> | 147 | 26   | 172  |
| LbrM24_V2.0320 | <i>L. braziliensis</i> | 40  | 354  | 393  |
| LbrM24_V2.0320 | <i>L. braziliensis</i> | 48  | 408  | 455  |
| LbrM24_V2.0320 | <i>L. braziliensis</i> | 48  | 408  | 455  |

|                |                        |     |      |      |
|----------------|------------------------|-----|------|------|
| LbrM24_V2.0330 | <i>L. braziliensis</i> | 59  | 83   | 141  |
| LbrM24_V2.0330 | <i>L. braziliensis</i> | 55  | 245  | 299  |
| LbrM24_V2.0330 | <i>L. braziliensis</i> | 89  | 309  | 397  |
| LbrM24_V2.0330 | <i>L. braziliensis</i> | 94  | 574  | 667  |
| LbrM24_V2.0330 | <i>L. braziliensis</i> | 127 | 830  | 956  |
| LbrM24_V2.0340 | <i>L. braziliensis</i> | 41  | 868  | 908  |
| LbrM24_V2.0350 | <i>L. braziliensis</i> | 70  | 220  | 289  |
| LbrM24_V2.0380 | <i>L. braziliensis</i> | 226 | 35   | 260  |
| LbrM24_V2.0380 | <i>L. braziliensis</i> | 127 | 347  | 473  |
| LbrM24_V2.0380 | <i>L. braziliensis</i> | 246 | 479  | 724  |
| LbrM24_V2.0390 | <i>L. braziliensis</i> | 57  | 200  | 256  |
| LbrM24_V2.0390 | <i>L. braziliensis</i> | 42  | 291  | 332  |
| LbrM24_V2.0390 | <i>L. braziliensis</i> | 66  | 447  | 512  |
| LbrM24_V2.0410 | <i>L. braziliensis</i> | 210 | 97   | 306  |
| LbrM24_V2.0430 | <i>L. braziliensis</i> | 153 | 1    | 153  |
| LbrM24_V2.0430 | <i>L. braziliensis</i> | 46  | 744  | 789  |
| LbrM24_V2.0430 | <i>L. braziliensis</i> | 41  | 1020 | 1060 |
| LbrM24_V2.0450 | <i>L. braziliensis</i> | 43  | 135  | 177  |
| LbrM24_V2.0460 | <i>L. braziliensis</i> | 92  | 126  | 217  |
| LbrM24_V2.0460 | <i>L. braziliensis</i> | 113 | 324  | 436  |
| LbrM24_V2.0460 | <i>L. braziliensis</i> | 52  | 465  | 516  |
| LbrM24_V2.0460 | <i>L. braziliensis</i> | 103 | 521  | 623  |
| LbrM24_V2.0480 | <i>L. braziliensis</i> | 41  | 132  | 172  |
| LbrM24_V2.0480 | <i>L. braziliensis</i> | 70  | 688  | 757  |
| LbrM24_V2.0480 | <i>L. braziliensis</i> | 42  | 1154 | 1195 |
| LbrM24_V2.0490 | <i>L. braziliensis</i> | 73  | 43   | 115  |
| LbrM24_V2.0490 | <i>L. braziliensis</i> | 87  | 175  | 261  |
| LbrM24_V2.0490 | <i>L. braziliensis</i> | 65  | 602  | 666  |
| LbrM24_V2.0490 | <i>L. braziliensis</i> | 225 | 694  | 918  |
| LbrM24_V2.0490 | <i>L. braziliensis</i> | 153 | 934  | 1086 |
| LbrM24_V2.0500 | <i>L. braziliensis</i> | 63  | 1    | 63   |
| LbrM24_V2.0500 | <i>L. braziliensis</i> | 89  | 345  | 433  |
| LbrM24_V2.0500 | <i>L. braziliensis</i> | 40  | 742  | 781  |
| LbrM24_V2.0500 | <i>L. braziliensis</i> | 50  | 852  | 901  |
| LbrM24_V2.0500 | <i>L. braziliensis</i> | 46  | 1476 | 1521 |
| LbrM24_V2.0500 | <i>L. braziliensis</i> | 75  | 1700 | 1774 |
| LbrM24_V2.0510 | <i>L. braziliensis</i> | 82  | 1    | 82   |
| LbrM24_V2.0510 | <i>L. braziliensis</i> | 102 | 136  | 237  |
| LbrM24_V2.0520 | <i>L. braziliensis</i> | 59  | 1    | 59   |
| LbrM24_V2.0520 | <i>L. braziliensis</i> | 66  | 67   | 132  |
| LbrM24_V2.0520 | <i>L. braziliensis</i> | 66  | 163  | 228  |
| LbrM24_V2.0520 | <i>L. braziliensis</i> | 43  | 297  | 339  |
| LbrM24_V2.0520 | <i>L. braziliensis</i> | 52  | 424  | 475  |
| LbrM24_V2.0520 | <i>L. braziliensis</i> | 135 | 508  | 642  |
| LbrM24_V2.0530 | <i>L. braziliensis</i> | 48  | 257  | 304  |
| LbrM24_V2.0530 | <i>L. braziliensis</i> | 66  | 536  | 601  |
| LbrM24_V2.0530 | <i>L. braziliensis</i> | 41  | 649  | 689  |

|                |                        |     |      |      |
|----------------|------------------------|-----|------|------|
| LbrM24_V2.0540 | <i>L. braziliensis</i> | 48  | 78   | 125  |
| LbrM24_V2.0540 | <i>L. braziliensis</i> | 99  | 133  | 231  |
| LbrM24_V2.0540 | <i>L. braziliensis</i> | 99  | 133  | 231  |
| LbrM24_V2.0550 | <i>L. braziliensis</i> | 45  | 157  | 201  |
| LbrM24_V2.0560 | <i>L. braziliensis</i> | 65  | 60   | 124  |
| LbrM24_V2.0570 | <i>L. braziliensis</i> | 46  | 85   | 130  |
| LbrM24_V2.0600 | <i>L. braziliensis</i> | 197 | 661  | 857  |
| LbrM24_V2.0610 | <i>L. braziliensis</i> | 73  | 815  | 887  |
| LbrM24_V2.0610 | <i>L. braziliensis</i> | 45  | 969  | 1013 |
| LbrM24_V2.0610 | <i>L. braziliensis</i> | 83  | 1029 | 1111 |
| LbrM24_V2.0610 | <i>L. braziliensis</i> | 51  | 1187 | 1237 |
| LbrM24_V2.0610 | <i>L. braziliensis</i> | 40  | 1400 | 1439 |
| LbrM24_V2.0610 | <i>L. braziliensis</i> | 70  | 1710 | 1779 |
| LbrM24_V2.0620 | <i>L. braziliensis</i> | 377 | 615  | 991  |
| LbrM24_V2.0620 | <i>L. braziliensis</i> | 104 | 993  | 1096 |
| LbrM24_V2.0630 | <i>L. braziliensis</i> | 66  | 34   | 99   |
| LbrM24_V2.0630 | <i>L. braziliensis</i> | 44  | 396  | 439  |
| LbrM24_V2.0630 | <i>L. braziliensis</i> | 309 | 499  | 807  |
| LbrM24_V2.0650 | <i>L. braziliensis</i> | 163 | 319  | 481  |
| LbrM24_V2.0660 | <i>L. braziliensis</i> | 863 | 157  | 1019 |
| LbrM24_V2.0670 | <i>L. braziliensis</i> | 79  | 1    | 79   |
| LbrM24_V2.0680 | <i>L. braziliensis</i> | 98  | 1    | 98   |
| LbrM24_V2.0680 | <i>L. braziliensis</i> | 261 | 422  | 682  |
| LbrM24_V2.0680 | <i>L. braziliensis</i> | 95  | 730  | 824  |
| LbrM24_V2.0680 | <i>L. braziliensis</i> | 189 | 867  | 1055 |
| LbrM24_V2.0680 | <i>L. braziliensis</i> | 178 | 1063 | 1240 |
| LbrM24_V2.0690 | <i>L. braziliensis</i> | 99  | 447  | 545  |
| LbrM24_V2.0700 | <i>L. braziliensis</i> | 41  | 112  | 152  |
| LbrM24_V2.0720 | <i>L. braziliensis</i> | 60  | 171  | 230  |
| LbrM24_V2.0720 | <i>L. braziliensis</i> | 44  | 289  | 332  |
| LbrM24_V2.0740 | <i>L. braziliensis</i> | 89  | 478  | 566  |
| LbrM24_V2.0750 | <i>L. braziliensis</i> | 231 | 1    | 231  |
| LbrM24_V2.0750 | <i>L. braziliensis</i> | 291 | 280  | 570  |
| LbrM24_V2.0750 | <i>L. braziliensis</i> | 68  | 785  | 852  |
| LbrM24_V2.0750 | <i>L. braziliensis</i> | 102 | 956  | 1057 |
| LbrM24_V2.0770 | <i>L. braziliensis</i> | 212 | 1    | 212  |
| LbrM24_V2.0770 | <i>L. braziliensis</i> | 49  | 312  | 360  |
| LbrM24_V2.0770 | <i>L. braziliensis</i> | 49  | 743  | 791  |
| LbrM24_V2.0770 | <i>L. braziliensis</i> | 53  | 973  | 1025 |
| LbrM24_V2.0770 | <i>L. braziliensis</i> | 70  | 1057 | 1126 |
| LbrM24_V2.0800 | <i>L. braziliensis</i> | 99  | 1    | 99   |
| LbrM24_V2.0800 | <i>L. braziliensis</i> | 154 | 110  | 263  |
| LbrM24_V2.0810 | <i>L. braziliensis</i> | 207 | 1    | 207  |
| LbrM24_V2.0810 | <i>L. braziliensis</i> | 87  | 230  | 316  |
| LbrM24_V2.0820 | <i>L. braziliensis</i> | 84  | 19   | 102  |
| LbrM24_V2.0820 | <i>L. braziliensis</i> | 115 | 144  | 258  |
| LbrM24_V2.0820 | <i>L. braziliensis</i> | 355 | 262  | 616  |

|                |                        |     |      |      |
|----------------|------------------------|-----|------|------|
| LbrM24_V2.0830 | <i>L. braziliensis</i> | 99  | 284  | 382  |
| LbrM24_V2.0840 | <i>L. braziliensis</i> | 55  | 53   | 107  |
| LbrM24_V2.0840 | <i>L. braziliensis</i> | 92  | 207  | 298  |
| LbrM24_V2.0840 | <i>L. braziliensis</i> | 51  | 302  | 352  |
| LbrM24_V2.0840 | <i>L. braziliensis</i> | 79  | 815  | 893  |
| LbrM24_V2.0840 | <i>L. braziliensis</i> | 58  | 975  | 1032 |
| LbrM24_V2.0840 | <i>L. braziliensis</i> | 103 | 1081 | 1183 |
| LbrM24_V2.0840 | <i>L. braziliensis</i> | 47  | 1506 | 1552 |
| LbrM24_V2.0840 | <i>L. braziliensis</i> | 104 | 1728 | 1831 |
| LbrM24_V2.0840 | <i>L. braziliensis</i> | 137 | 2253 | 2389 |
| LbrM24_V2.0840 | <i>L. braziliensis</i> | 104 | 2604 | 2707 |
| LbrM24_V2.0860 | <i>L. braziliensis</i> | 46  | 1    | 46   |
| LbrM24_V2.0860 | <i>L. braziliensis</i> | 61  | 319  | 379  |
| LbrM24_V2.0860 | <i>L. braziliensis</i> | 105 | 707  | 811  |
| LbrM24_V2.0900 | <i>L. braziliensis</i> | 97  | 181  | 277  |
| LbrM24_V2.0900 | <i>L. braziliensis</i> | 60  | 283  | 342  |
| LbrM24_V2.0900 | <i>L. braziliensis</i> | 43  | 627  | 669  |
| LbrM24_V2.0900 | <i>L. braziliensis</i> | 57  | 798  | 854  |
| LbrM24_V2.0910 | <i>L. braziliensis</i> | 690 | 1    | 690  |
| LbrM24_V2.0920 | <i>L. braziliensis</i> | 57  | 181  | 237  |
| LbrM24_V2.0920 | <i>L. braziliensis</i> | 50  | 561  | 610  |
| LbrM24_V2.0930 | <i>L. braziliensis</i> | 102 | 1    | 102  |
| LbrM24_V2.0930 | <i>L. braziliensis</i> | 40  | 236  | 275  |
| LbrM24_V2.0940 | <i>L. braziliensis</i> | 42  | 104  | 145  |
| LbrM24_V2.0940 | <i>L. braziliensis</i> | 87  | 518  | 604  |
| LbrM24_V2.0940 | <i>L. braziliensis</i> | 41  | 660  | 700  |
| LbrM24_V2.0940 | <i>L. braziliensis</i> | 66  | 841  | 906  |
| LbrM24_V2.0960 | <i>L. braziliensis</i> | 77  | 160  | 236  |
| LbrM24_V2.0970 | <i>L. braziliensis</i> | 121 | 16   | 136  |
| LbrM24_V2.0970 | <i>L. braziliensis</i> | 813 | 200  | 1012 |
| LbrM24_V2.0980 | <i>L. braziliensis</i> | 82  | 175  | 256  |
| LbrM24_V2.0990 | <i>L. braziliensis</i> | 143 | 56   | 198  |
| LbrM24_V2.0990 | <i>L. braziliensis</i> | 145 | 212  | 356  |
| LbrM24_V2.0990 | <i>L. braziliensis</i> | 885 | 359  | 1243 |
| LbrM24_V2.0990 | <i>L. braziliensis</i> | 183 | 1354 | 1536 |
| LbrM24_V2.1000 | <i>L. braziliensis</i> | 173 | 492  | 664  |
| LbrM24_V2.1010 | <i>L. braziliensis</i> | 86  | 76   | 161  |
| LbrM24_V2.1010 | <i>L. braziliensis</i> | 165 | 165  | 329  |
| LbrM24_V2.1010 | <i>L. braziliensis</i> | 88  | 397  | 484  |
| LbrM24_V2.1020 | <i>L. braziliensis</i> | 55  | 84   | 138  |
| LbrM24_V2.1020 | <i>L. braziliensis</i> | 76  | 164  | 239  |
| LbrM24_V2.1020 | <i>L. braziliensis</i> | 141 | 289  | 429  |
| LbrM24_V2.1030 | <i>L. braziliensis</i> | 103 | 1    | 103  |
| LbrM24_V2.1030 | <i>L. braziliensis</i> | 65  | 198  | 262  |
| LbrM24_V2.1030 | <i>L. braziliensis</i> | 80  | 416  | 495  |
| LbrM24_V2.1030 | <i>L. braziliensis</i> | 42  | 535  | 576  |
| LbrM24_V2.1030 | <i>L. braziliensis</i> | 201 | 662  | 862  |

|                |                        |     |      |      |
|----------------|------------------------|-----|------|------|
| LbrM24_V2.1030 | <i>L. braziliensis</i> | 117 | 943  | 1059 |
| LbrM24_V2.1050 | <i>L. braziliensis</i> | 51  | 1    | 51   |
| LbrM24_V2.1050 | <i>L. braziliensis</i> | 46  | 81   | 126  |
| LbrM24_V2.1050 | <i>L. braziliensis</i> | 123 | 156  | 278  |
| LbrM24_V2.1050 | <i>L. braziliensis</i> | 157 | 347  | 503  |
| LbrM24_V2.1050 | <i>L. braziliensis</i> | 87  | 649  | 735  |
| LbrM24_V2.1050 | <i>L. braziliensis</i> | 118 | 800  | 917  |
| LbrM24_V2.1060 | <i>L. braziliensis</i> | 276 | 28   | 303  |
| LbrM24_V2.1060 | <i>L. braziliensis</i> | 42  | 413  | 454  |
| LbrM24_V2.1060 | <i>L. braziliensis</i> | 55  | 527  | 581  |
| LbrM24_V2.1060 | <i>L. braziliensis</i> | 140 | 760  | 899  |
| LbrM24_V2.1060 | <i>L. braziliensis</i> | 60  | 1184 | 1243 |
| LbrM24_V2.1060 | <i>L. braziliensis</i> | 148 | 1251 | 1398 |
| LbrM24_V2.1070 | <i>L. braziliensis</i> | 151 | 80   | 230  |
| LbrM24_V2.1080 | <i>L. braziliensis</i> | 54  | 133  | 186  |
| LbrM24_V2.1080 | <i>L. braziliensis</i> | 62  | 233  | 294  |
| LbrM24_V2.1080 | <i>L. braziliensis</i> | 184 | 496  | 679  |
| LbrM24_V2.1080 | <i>L. braziliensis</i> | 51  | 716  | 766  |
| LbrM24_V2.1080 | <i>L. braziliensis</i> | 44  | 790  | 833  |
| LbrM24_V2.1080 | <i>L. braziliensis</i> | 45  | 1290 | 1334 |
| LbrM24_V2.1080 | <i>L. braziliensis</i> | 213 | 1351 | 1563 |
| LbrM24_V2.1080 | <i>L. braziliensis</i> | 133 | 1874 | 2006 |
| LbrM24_V2.1080 | <i>L. braziliensis</i> | 65  | 2068 | 2132 |
| LbrM24_V2.1080 | <i>L. braziliensis</i> | 61  | 2222 | 2282 |
| LbrM24_V2.1080 | <i>L. braziliensis</i> | 57  | 2303 | 2359 |
| LbrM24_V2.1090 | <i>L. braziliensis</i> | 77  | 298  | 374  |
| LbrM24_V2.1100 | <i>L. braziliensis</i> | 128 | 249  | 376  |
| LbrM24_V2.1100 | <i>L. braziliensis</i> | 42  | 539  | 580  |
| LbrM24_V2.1110 | <i>L. braziliensis</i> | 49  | 74   | 122  |
| LbrM24_V2.1110 | <i>L. braziliensis</i> | 43  | 193  | 235  |
| LbrM24_V2.1110 | <i>L. braziliensis</i> | 141 | 239  | 379  |
| LbrM24_V2.1110 | <i>L. braziliensis</i> | 46  | 696  | 741  |
| LbrM24_V2.1110 | <i>L. braziliensis</i> | 82  | 1007 | 1088 |
| LbrM24_V2.1120 | <i>L. braziliensis</i> | 53  | 305  | 357  |
| LbrM24_V2.1120 | <i>L. braziliensis</i> | 296 | 420  | 715  |
| LbrM24_V2.1120 | <i>L. braziliensis</i> | 66  | 940  | 1005 |
| LbrM24_V2.1120 | <i>L. braziliensis</i> | 60  | 1116 | 1175 |
| LbrM24_V2.1130 | <i>L. braziliensis</i> | 160 | 284  | 443  |
| LbrM24_V2.1130 | <i>L. braziliensis</i> | 132 | 523  | 654  |
| LbrM24_V2.1130 | <i>L. braziliensis</i> | 133 | 815  | 947  |
| LbrM24_V2.1140 | <i>L. braziliensis</i> | 266 | 1    | 266  |
| LbrM24_V2.1140 | <i>L. braziliensis</i> | 176 | 293  | 468  |
| LbrM24_V2.1150 | <i>L. braziliensis</i> | 145 | 64   | 208  |
| LbrM24_V2.1150 | <i>L. braziliensis</i> | 90  | 211  | 300  |
| LbrM24_V2.1150 | <i>L. braziliensis</i> | 59  | 309  | 367  |
| LbrM24_V2.1150 | <i>L. braziliensis</i> | 232 | 403  | 634  |
| LbrM24_V2.1150 | <i>L. braziliensis</i> | 253 | 652  | 904  |

|                |                        |     |      |      |
|----------------|------------------------|-----|------|------|
| LbrM24_V2.1150 | <i>L. braziliensis</i> | 66  | 942  | 1007 |
| LbrM24_V2.1160 | <i>L. braziliensis</i> | 115 | 1    | 115  |
| LbrM24_V2.1160 | <i>L. braziliensis</i> | 40  | 246  | 285  |
| LbrM24_V2.1170 | <i>L. braziliensis</i> | 130 | 1    | 130  |
| LbrM24_V2.1180 | <i>L. braziliensis</i> | 56  | 17   | 72   |
| LbrM24_V2.1180 | <i>L. braziliensis</i> | 58  | 152  | 209  |
| LbrM24_V2.1180 | <i>L. braziliensis</i> | 85  | 232  | 316  |
| LbrM24_V2.1180 | <i>L. braziliensis</i> | 106 | 318  | 423  |
| LbrM24_V2.1180 | <i>L. braziliensis</i> | 332 | 437  | 768  |
| LbrM24_V2.1190 | <i>L. braziliensis</i> | 44  | 914  | 957  |
| LbrM24_V2.1190 | <i>L. braziliensis</i> | 86  | 978  | 1063 |
| LbrM24_V2.1190 | <i>L. braziliensis</i> | 65  | 1112 | 1176 |
| LbrM24_V2.1200 | <i>L. braziliensis</i> | 69  | 1    | 69   |
| LbrM24_V2.1200 | <i>L. braziliensis</i> | 175 | 86   | 260  |
| LbrM24_V2.1210 | <i>L. braziliensis</i> | 55  | 1    | 55   |
| LbrM24_V2.1220 | <i>L. braziliensis</i> | 277 | 1    | 277  |
| LbrM24_V2.1240 | <i>L. braziliensis</i> | 111 | 24   | 134  |
| LbrM24_V2.1240 | <i>L. braziliensis</i> | 99  | 177  | 275  |
| LbrM24_V2.1240 | <i>L. braziliensis</i> | 57  | 380  | 436  |
| LbrM24_V2.1240 | <i>L. braziliensis</i> | 74  | 469  | 542  |
| LbrM24_V2.1250 | <i>L. braziliensis</i> | 155 | 1    | 155  |
| LbrM24_V2.1250 | <i>L. braziliensis</i> | 164 | 220  | 383  |
| LbrM24_V2.1250 | <i>L. braziliensis</i> | 53  | 617  | 669  |
| LbrM24_V2.1280 | <i>L. braziliensis</i> | 52  | 18   | 69   |
| LbrM24_V2.1300 | <i>L. braziliensis</i> | 42  | 323  | 364  |
| LbrM24_V2.1300 | <i>L. braziliensis</i> | 67  | 429  | 495  |
| LbrM24_V2.1300 | <i>L. braziliensis</i> | 67  | 429  | 495  |
| LbrM24_V2.1310 | <i>L. braziliensis</i> | 75  | 83   | 157  |
| LbrM24_V2.1310 | <i>L. braziliensis</i> | 131 | 190  | 320  |
| LbrM24_V2.1310 | <i>L. braziliensis</i> | 57  | 328  | 384  |
| LbrM24_V2.1310 | <i>L. braziliensis</i> | 56  | 488  | 543  |
| LbrM24_V2.1310 | <i>L. braziliensis</i> | 74  | 726  | 799  |
| LbrM24_V2.1330 | <i>L. braziliensis</i> | 106 | 1    | 106  |
| LbrM24_V2.1330 | <i>L. braziliensis</i> | 313 | 137  | 449  |
| LbrM24_V2.1330 | <i>L. braziliensis</i> | 177 | 1153 | 1329 |
| LbrM24_V2.1330 | <i>L. braziliensis</i> | 161 | 1438 | 1598 |
| LbrM24_V2.1330 | <i>L. braziliensis</i> | 275 | 1609 | 1883 |
| LbrM24_V2.1330 | <i>L. braziliensis</i> | 130 | 1902 | 2031 |
| LbrM24_V2.1340 | <i>L. braziliensis</i> | 73  | 68   | 140  |
| LbrM24_V2.1340 | <i>L. braziliensis</i> | 138 | 143  | 280  |
| LbrM24_V2.1340 | <i>L. braziliensis</i> | 102 | 311  | 412  |
| LbrM24_V2.1340 | <i>L. braziliensis</i> | 64  | 414  | 477  |
| LbrM24_V2.1340 | <i>L. braziliensis</i> | 183 | 564  | 746  |
| LbrM24_V2.1340 | <i>L. braziliensis</i> | 54  | 890  | 943  |
| LbrM24_V2.1360 | <i>L. braziliensis</i> | 86  | 24   | 109  |
| LbrM24_V2.1370 | <i>L. braziliensis</i> | 100 | 34   | 133  |
| LbrM24_V2.1370 | <i>L. braziliensis</i> | 92  | 262  | 353  |



|                |                        |     |      |      |
|----------------|------------------------|-----|------|------|
| LbrM24_V2.1370 | <i>L. braziliensis</i> | 83  | 551  | 633  |
| LbrM24_V2.1380 | <i>L. braziliensis</i> | 150 | 112  | 261  |
| LbrM24_V2.1380 | <i>L. braziliensis</i> | 56  | 304  | 359  |
| LbrM24_V2.1380 | <i>L. braziliensis</i> | 72  | 419  | 490  |
| LbrM24_V2.1380 | <i>L. braziliensis</i> | 100 | 500  | 599  |
| LbrM24_V2.1380 | <i>L. braziliensis</i> | 70  | 756  | 825  |
| LbrM24_V2.1380 | <i>L. braziliensis</i> | 88  | 1303 | 1390 |
| LbrM24_V2.1380 | <i>L. braziliensis</i> | 64  | 1401 | 1464 |
| LbrM24_V2.1380 | <i>L. braziliensis</i> | 55  | 1526 | 1580 |
| LbrM24_V2.1380 | <i>L. braziliensis</i> | 62  | 1611 | 1672 |
| LbrM24_V2.1380 | <i>L. braziliensis</i> | 93  | 1836 | 1928 |
| LbrM24_V2.1380 | <i>L. braziliensis</i> | 61  | 1968 | 2028 |
| LbrM24_V2.1380 | <i>L. braziliensis</i> | 194 | 2134 | 2327 |
| LbrM24_V2.1380 | <i>L. braziliensis</i> | 230 | 2376 | 2605 |
| LbrM24_V2.1380 | <i>L. braziliensis</i> | 251 | 2615 | 2865 |
| LbrM24_V2.1390 | <i>L. braziliensis</i> | 189 | 1    | 189  |
| LbrM24_V2.1390 | <i>L. braziliensis</i> | 53  | 392  | 444  |
| LbrM24_V2.1390 | <i>L. braziliensis</i> | 176 | 506  | 681  |
| LbrM24_V2.1390 | <i>L. braziliensis</i> | 43  | 764  | 806  |
| LbrM24_V2.1410 | <i>L. braziliensis</i> | 254 | 1    | 254  |
| LbrM24_V2.1420 | <i>L. braziliensis</i> | 57  | 25   | 81   |
| LbrM24_V2.1420 | <i>L. braziliensis</i> | 74  | 459  | 532  |
| LbrM24_V2.1440 | <i>L. braziliensis</i> | 661 | 1    | 661  |
| LbrM24_V2.1440 | <i>L. braziliensis</i> | 175 | 741  | 915  |
| LbrM24_V2.1450 | <i>L. braziliensis</i> | 186 | 1    | 186  |
| LbrM24_V2.1450 | <i>L. braziliensis</i> | 418 | 194  | 611  |
| LbrM24_V2.1450 | <i>L. braziliensis</i> | 91  | 669  | 759  |
| LbrM24_V2.1450 | <i>L. braziliensis</i> | 305 | 777  | 1081 |
| LbrM24_V2.1450 | <i>L. braziliensis</i> | 170 | 1127 | 1296 |
| LbrM24_V2.1450 | <i>L. braziliensis</i> | 41  | 1302 | 1342 |
| LbrM24_V2.1450 | <i>L. braziliensis</i> | 49  | 1666 | 1714 |
| LbrM24_V2.1450 | <i>L. braziliensis</i> | 177 | 1732 | 1908 |
| LbrM24_V2.1450 | <i>L. braziliensis</i> | 235 | 1992 | 2226 |
| LbrM24_V2.1450 | <i>L. braziliensis</i> | 80  | 2255 | 2334 |
| LbrM24_V2.1450 | <i>L. braziliensis</i> | 47  | 2378 | 2424 |
| LbrM24_V2.1450 | <i>L. braziliensis</i> | 150 | 2448 | 2597 |
| LbrM24_V2.1450 | <i>L. braziliensis</i> | 76  | 2651 | 2726 |
| LbrM24_V2.1450 | <i>L. braziliensis</i> | 118 | 2739 | 2856 |
| LbrM24_V2.1450 | <i>L. braziliensis</i> | 56  | 2882 | 2937 |
| LbrM24_V2.1450 | <i>L. braziliensis</i> | 53  | 2971 | 3023 |
| LbrM24_V2.1450 | <i>L. braziliensis</i> | 51  | 3090 | 3140 |
| LbrM24_V2.1450 | <i>L. braziliensis</i> | 59  | 3191 | 3249 |
| LbrM24_V2.1460 | <i>L. braziliensis</i> | 57  | 215  | 271  |
| LbrM24_V2.1460 | <i>L. braziliensis</i> | 81  | 297  | 377  |
| LbrM24_V2.1460 | <i>L. braziliensis</i> | 80  | 495  | 574  |
| LbrM24_V2.1460 | <i>L. braziliensis</i> | 175 | 580  | 754  |
| LbrM24_V2.1460 | <i>L. braziliensis</i> | 167 | 760  | 926  |

|                |                        |     |      |      |
|----------------|------------------------|-----|------|------|
| LbrM24_V2.1460 | <i>L. braziliensis</i> | 77  | 1193 | 1269 |
| LbrM24_V2.1480 | <i>L. braziliensis</i> | 148 | 1    | 148  |
| LbrM24_V2.1490 | <i>L. braziliensis</i> | 157 | 73   | 229  |
| LbrM24_V2.1500 | <i>L. braziliensis</i> | 157 | 73   | 229  |
| LbrM24_V2.1510 | <i>L. braziliensis</i> | 52  | 382  | 433  |
| LbrM24_V2.1520 | <i>L. braziliensis</i> | 42  | 1    | 42   |
| LbrM24_V2.1520 | <i>L. braziliensis</i> | 102 | 367  | 468  |
| LbrM24_V2.1530 | <i>L. braziliensis</i> | 82  | 235  | 316  |
| LbrM24_V2.1540 | <i>L. braziliensis</i> | 59  | 440  | 498  |
| LbrM24_V2.1540 | <i>L. braziliensis</i> | 52  | 623  | 674  |
| LbrM24_V2.1540 | <i>L. braziliensis</i> | 60  | 833  | 892  |
| LbrM24_V2.1620 | <i>L. braziliensis</i> | 67  | 134  | 200  |
| LbrM24_V2.1620 | <i>L. braziliensis</i> | 81  | 1105 | 1185 |
| LbrM24_V2.1620 | <i>L. braziliensis</i> | 53  | 1329 | 1381 |
| LbrM24_V2.1630 | <i>L. braziliensis</i> | 81  | 76   | 156  |
| LbrM24_V2.1640 | <i>L. braziliensis</i> | 60  | 303  | 362  |
| LbrM24_V2.1650 | <i>L. braziliensis</i> | 64  | 266  | 329  |
| LbrM24_V2.1650 | <i>L. braziliensis</i> | 191 | 334  | 524  |
| LbrM24_V2.1700 | <i>L. braziliensis</i> | 67  | 326  | 392  |
| LbrM24_V2.1710 | <i>L. braziliensis</i> | 100 | 1    | 100  |
| LbrM24_V2.1710 | <i>L. braziliensis</i> | 74  | 165  | 238  |
| LbrM24_V2.1710 | <i>L. braziliensis</i> | 140 | 261  | 400  |
| LbrM24_V2.1710 | <i>L. braziliensis</i> | 65  | 437  | 501  |
| LbrM24_V2.1720 | <i>L. braziliensis</i> | 101 | 1    | 101  |
| LbrM24_V2.1720 | <i>L. braziliensis</i> | 46  | 226  | 271  |
| LbrM24_V2.1730 | <i>L. braziliensis</i> | 102 | 173  | 274  |
| LbrM24_V2.1740 | <i>L. braziliensis</i> | 45  | 213  | 257  |
| LbrM24_V2.1760 | <i>L. braziliensis</i> | 88  | 149  | 236  |
| LbrM24_V2.1770 | <i>L. braziliensis</i> | 42  | 1    | 42   |
| LbrM24_V2.1780 | <i>L. braziliensis</i> | 251 | 1    | 251  |
| LbrM24_V2.1780 | <i>L. braziliensis</i> | 80  | 278  | 357  |
| LbrM24_V2.1780 | <i>L. braziliensis</i> | 43  | 536  | 578  |
| LbrM24_V2.1780 | <i>L. braziliensis</i> | 82  | 756  | 837  |
| LbrM24_V2.1790 | <i>L. braziliensis</i> | 265 | 1    | 265  |
| LbrM24_V2.1790 | <i>L. braziliensis</i> | 52  | 287  | 338  |
| LbrM24_V2.1790 | <i>L. braziliensis</i> | 78  | 495  | 572  |
| LbrM24_V2.1790 | <i>L. braziliensis</i> | 71  | 900  | 970  |
| LbrM24_V2.1790 | <i>L. braziliensis</i> | 59  | 1104 | 1162 |
| LbrM24_V2.1800 | <i>L. braziliensis</i> | 98  | 114  | 211  |
| LbrM24_V2.1810 | <i>L. braziliensis</i> | 52  | 1    | 52   |
| LbrM24_V2.1810 | <i>L. braziliensis</i> | 93  | 60   | 152  |
| LbrM24_V2.1810 | <i>L. braziliensis</i> | 93  | 60   | 152  |
| LbrM24_V2.1820 | <i>L. braziliensis</i> | 58  | 60   | 117  |
| LbrM24_V2.1830 | <i>L. braziliensis</i> | 58  | 60   | 117  |
| LbrM24_V2.1850 | <i>L. braziliensis</i> | 44  | 469  | 512  |
| LbrM24_V2.1850 | <i>L. braziliensis</i> | 52  | 588  | 639  |
| LbrM24_V2.1850 | <i>L. braziliensis</i> | 50  | 1095 | 1144 |

|                |                        |     |      |      |
|----------------|------------------------|-----|------|------|
| LbrM24_V2.1850 | <i>L. braziliensis</i> | 78  | 1180 | 1257 |
| LbrM24_V2.1860 | <i>L. braziliensis</i> | 126 | 1    | 126  |
| LbrM24_V2.1880 | <i>L. braziliensis</i> | 43  | 1    | 43   |
| LbrM24_V2.1880 | <i>L. braziliensis</i> | 59  | 323  | 381  |
| LbrM24_V2.1890 | <i>L. braziliensis</i> | 40  | 97   | 136  |
| LbrM24_V2.1900 | <i>L. braziliensis</i> | 136 | 1    | 136  |
| LbrM24_V2.1920 | <i>L. braziliensis</i> | 171 | 86   | 256  |
| LbrM24_V2.1930 | <i>L. braziliensis</i> | 188 | 1    | 188  |
| LbrM24_V2.1930 | <i>L. braziliensis</i> | 297 | 202  | 498  |
| LbrM24_V2.1940 | <i>L. braziliensis</i> | 80  | 40   | 119  |
| LbrM24_V2.1940 | <i>L. braziliensis</i> | 86  | 334  | 419  |
| LbrM24_V2.1940 | <i>L. braziliensis</i> | 68  | 462  | 529  |
| LbrM24_V2.1940 | <i>L. braziliensis</i> | 84  | 656  | 739  |
| LbrM24_V2.1940 | <i>L. braziliensis</i> | 104 | 798  | 901  |
| LbrM24_V2.1940 | <i>L. braziliensis</i> | 79  | 1020 | 1098 |
| LbrM24_V2.1940 | <i>L. braziliensis</i> | 99  | 1137 | 1235 |
| LbrM24_V2.1950 | <i>L. braziliensis</i> | 104 | 88   | 191  |
| LbrM24_V2.1950 | <i>L. braziliensis</i> | 199 | 738  | 936  |
| LbrM24_V2.1960 | <i>L. braziliensis</i> | 173 | 1    | 173  |
| LbrM24_V2.1960 | <i>L. braziliensis</i> | 41  | 206  | 246  |
| LbrM24_V2.1960 | <i>L. braziliensis</i> | 151 | 373  | 523  |
| LbrM24_V2.1960 | <i>L. braziliensis</i> | 149 | 560  | 708  |
| LbrM24_V2.1970 | <i>L. braziliensis</i> | 44  | 493  | 536  |
| LbrM24_V2.1980 | <i>L. braziliensis</i> | 41  | 326  | 366  |
| LbrM24_V2.2000 | <i>L. braziliensis</i> | 114 | 1    | 114  |
| LbrM24_V2.2000 | <i>L. braziliensis</i> | 70  | 228  | 297  |
| LbrM24_V2.2000 | <i>L. braziliensis</i> | 107 | 371  | 477  |
| LbrM24_V2.2000 | <i>L. braziliensis</i> | 47  | 481  | 527  |
| LbrM24_V2.2010 | <i>L. braziliensis</i> | 119 | 1    | 119  |
| LbrM24_V2.2010 | <i>L. braziliensis</i> | 48  | 261  | 308  |
| LbrM24_V2.2010 | <i>L. braziliensis</i> | 49  | 433  | 481  |
| LbrM24_V2.2010 | <i>L. braziliensis</i> | 57  | 549  | 605  |
| LbrM24_V2.2020 | <i>L. braziliensis</i> | 115 | 37   | 151  |
| LbrM24_V2.2030 | <i>L. braziliensis</i> | 85  | 607  | 691  |
| LbrM24_V2.2040 | <i>L. braziliensis</i> | 160 | 18   | 177  |
| LbrM24_V2.2040 | <i>L. braziliensis</i> | 126 | 237  | 362  |
| LbrM24_V2.2040 | <i>L. braziliensis</i> | 129 | 407  | 535  |
| LbrM24_V2.2040 | <i>L. braziliensis</i> | 282 | 538  | 819  |
| LbrM24_V2.2050 | <i>L. braziliensis</i> | 54  | 32   | 85   |
| LbrM24_V2.2050 | <i>L. braziliensis</i> | 161 | 191  | 351  |
| LbrM24_V2.2060 | <i>L. braziliensis</i> | 185 | 47   | 231  |
| LbrM24_V2.2070 | <i>L. braziliensis</i> | 120 | 24   | 143  |
| LbrM24_V2.2070 | <i>L. braziliensis</i> | 78  | 178  | 255  |
| LbrM24_V2.2070 | <i>L. braziliensis</i> | 77  | 272  | 348  |
| LbrM24_V2.2080 | <i>L. braziliensis</i> | 41  | 194  | 234  |
| LbrM24_V2.2090 | <i>L. braziliensis</i> | 170 | 543  | 712  |
| LbrM24_V2.2090 | <i>L. braziliensis</i> | 62  | 763  | 824  |

|                |                        |     |      |      |
|----------------|------------------------|-----|------|------|
| LbrM24_V2.2100 | <i>L. braziliensis</i> | 69  | 1    | 69   |
| LbrM24_V2.2100 | <i>L. braziliensis</i> | 42  | 149  | 190  |
| LbrM24_V2.2100 | <i>L. braziliensis</i> | 57  | 1388 | 1444 |
| LbrM24_V2.2130 | <i>L. braziliensis</i> | 40  | 1    | 40   |
| LbrM24_V2.2130 | <i>L. braziliensis</i> | 40  | 104  | 143  |
| LbrM24_V2.2130 | <i>L. braziliensis</i> | 40  | 104  | 143  |
| LbrM24_V2.2140 | <i>L. braziliensis</i> | 66  | 246  | 311  |
| LbrM24_V2.2150 | <i>L. braziliensis</i> | 46  | 1    | 46   |
| LbrM24_V2.2150 | <i>L. braziliensis</i> | 81  | 122  | 202  |
| LbrM24_V2.2150 | <i>L. braziliensis</i> | 81  | 122  | 202  |
| LbrM24_V2.2160 | <i>L. braziliensis</i> | 46  | 1    | 46   |
| LbrM24_V2.2160 | <i>L. braziliensis</i> | 81  | 122  | 202  |
| LbrM24_V2.2160 | <i>L. braziliensis</i> | 81  | 122  | 202  |
| LbrM24_V2.2180 | <i>L. braziliensis</i> | 108 | 196  | 303  |
| LbrM24_V2.2200 | <i>L. braziliensis</i> | 46  | 19   | 64   |
| LbrM24_V2.2200 | <i>L. braziliensis</i> | 245 | 79   | 323  |
| LbrM24_V2.2200 | <i>L. braziliensis</i> | 42  | 403  | 444  |
| LbrM24_V2.2220 | <i>L. braziliensis</i> | 98  | 1    | 98   |
| LbrM24_V2.2230 | <i>L. braziliensis</i> | 83  | 1    | 83   |
| LbrM24_V2.2230 | <i>L. braziliensis</i> | 56  | 89   | 144  |
| LbrM24_V2.2250 | <i>L. braziliensis</i> | 53  | 65   | 117  |
| LbrM24_V2.2250 | <i>L. braziliensis</i> | 50  | 593  | 642  |
| LbrM24_V2.2250 | <i>L. braziliensis</i> | 50  | 593  | 642  |
| LbrM24_V2.2260 | <i>L. braziliensis</i> | 621 | 21   | 641  |
| LbrM24_V2.2260 | <i>L. braziliensis</i> | 351 | 661  | 1011 |
| LbrM24_V2.2260 | <i>L. braziliensis</i> | 228 | 1049 | 1276 |
| LbrM24_V2.2260 | <i>L. braziliensis</i> | 161 | 1278 | 1438 |
| LbrM24_V2.2270 | <i>L. braziliensis</i> | 56  | 1    | 56   |
| LbrM24_V2.2280 | <i>L. braziliensis</i> | 40  | 206  | 245  |
| LbrM24_V2.2290 | <i>L. braziliensis</i> | 41  | 84   | 124  |
| LbrM24_V2.2320 | <i>L. braziliensis</i> | 77  | 122  | 198  |
| LbrM24_V2.2320 | <i>L. braziliensis</i> | 40  | 209  | 248  |
| LbrM24_V2.2340 | <i>L. braziliensis</i> | 69  | 1    | 69   |
| LbrM24_V2.2360 | <i>L. braziliensis</i> | 76  | 738  | 813  |
| LbrM24_V2.2380 | <i>L. braziliensis</i> | 57  | 78   | 134  |
| LbrM24_V2.2390 | <i>L. braziliensis</i> | 59  | 105  | 163  |
| LbrM24_V2.2400 | <i>L. braziliensis</i> | 44  | 29   | 72   |
| LbrM24_V2.2410 | <i>L. braziliensis</i> | 41  | 63   | 103  |
| LbrM24_V2.2410 | <i>L. braziliensis</i> | 83  | 176  | 258  |
| LbrM24_V2.2420 | <i>L. braziliensis</i> | 40  | 184  | 223  |
| LbrM24_V2.2430 | <i>L. braziliensis</i> | 178 | 199  | 376  |
| LbrM24_V2.2430 | <i>L. braziliensis</i> | 111 | 556  | 666  |
| LbrM24_V2.2430 | <i>L. braziliensis</i> | 92  | 855  | 946  |
| LbrM24_V2.2430 | <i>L. braziliensis</i> | 56  | 1460 | 1515 |
| LbrM24_V2.2440 | <i>L. braziliensis</i> | 146 | 351  | 496  |
| LbrM24_V2.2450 | <i>L. braziliensis</i> | 154 | 1    | 154  |
| LbrM24_V2.2450 | <i>L. braziliensis</i> | 67  | 162  | 228  |

|                |                        |     |      |      |
|----------------|------------------------|-----|------|------|
| LbrM24_V2.2450 | <i>L. braziliensis</i> | 293 | 389  | 681  |
| LbrM25_V2.0010 | <i>L. braziliensis</i> | 42  | 191  | 232  |
| LbrM25_V2.0030 | <i>L. braziliensis</i> | 100 | 366  | 465  |
| LbrM25_V2.0040 | <i>L. braziliensis</i> | 69  | 1    | 69   |
| LbrM25_V2.0040 | <i>L. braziliensis</i> | 46  | 166  | 211  |
| LbrM25_V2.0040 | <i>L. braziliensis</i> | 72  | 213  | 284  |
| LbrM25_V2.0040 | <i>L. braziliensis</i> | 124 | 376  | 499  |
| LbrM25_V2.0040 | <i>L. braziliensis</i> | 142 | 556  | 697  |
| LbrM25_V2.0040 | <i>L. braziliensis</i> | 48  | 994  | 1041 |
| LbrM25_V2.0040 | <i>L. braziliensis</i> | 41  | 1189 | 1229 |
| LbrM25_V2.0050 | <i>L. braziliensis</i> | 57  | 115  | 171  |
| LbrM25_V2.0070 | <i>L. braziliensis</i> | 57  | 1    | 57   |
| LbrM25_V2.0080 | <i>L. braziliensis</i> | 147 | 345  | 491  |
| LbrM25_V2.0090 | <i>L. braziliensis</i> | 66  | 1    | 66   |
| LbrM25_V2.0110 | <i>L. braziliensis</i> | 48  | 253  | 300  |
| LbrM25_V2.0150 | <i>L. braziliensis</i> | 41  | 151  | 191  |
| LbrM25_V2.0150 | <i>L. braziliensis</i> | 59  | 332  | 390  |
| LbrM25_V2.0150 | <i>L. braziliensis</i> | 59  | 332  | 390  |
| LbrM25_V2.0160 | <i>L. braziliensis</i> | 70  | 14   | 83   |
| LbrM25_V2.0160 | <i>L. braziliensis</i> | 44  | 129  | 172  |
| LbrM25_V2.0160 | <i>L. braziliensis</i> | 44  | 129  | 172  |
| LbrM25_V2.0170 | <i>L. braziliensis</i> | 119 | 393  | 511  |
| LbrM25_V2.0170 | <i>L. braziliensis</i> | 84  | 675  | 758  |
| LbrM25_V2.0200 | <i>L. braziliensis</i> | 67  | 767  | 833  |
| LbrM25_V2.0220 | <i>L. braziliensis</i> | 154 | 124  | 277  |
| LbrM25_V2.0220 | <i>L. braziliensis</i> | 156 | 558  | 713  |
| LbrM25_V2.0230 | <i>L. braziliensis</i> | 79  | 1    | 79   |
| LbrM25_V2.0230 | <i>L. braziliensis</i> | 57  | 271  | 327  |
| LbrM25_V2.0230 | <i>L. braziliensis</i> | 57  | 271  | 327  |
| LbrM25_V2.0240 | <i>L. braziliensis</i> | 110 | 1    | 110  |
| LbrM25_V2.0250 | <i>L. braziliensis</i> | 258 | 341  | 598  |
| LbrM25_V2.0250 | <i>L. braziliensis</i> | 264 | 615  | 878  |
| LbrM25_V2.0270 | <i>L. braziliensis</i> | 40  | 1    | 40   |
| LbrM25_V2.0270 | <i>L. braziliensis</i> | 49  | 267  | 315  |
| LbrM25_V2.0270 | <i>L. braziliensis</i> | 58  | 323  | 380  |
| LbrM25_V2.0270 | <i>L. braziliensis</i> | 138 | 415  | 552  |
| LbrM25_V2.0270 | <i>L. braziliensis</i> | 61  | 580  | 640  |
| LbrM25_V2.0270 | <i>L. braziliensis</i> | 151 | 745  | 895  |
| LbrM25_V2.0270 | <i>L. braziliensis</i> | 141 | 936  | 1076 |
| LbrM25_V2.0270 | <i>L. braziliensis</i> | 107 | 1078 | 1184 |
| LbrM25_V2.0280 | <i>L. braziliensis</i> | 72  | 99   | 170  |
| LbrM25_V2.0280 | <i>L. braziliensis</i> | 130 | 223  | 352  |
| LbrM25_V2.0280 | <i>L. braziliensis</i> | 46  | 401  | 446  |
| LbrM25_V2.0280 | <i>L. braziliensis</i> | 84  | 547  | 630  |
| LbrM25_V2.0290 | <i>L. braziliensis</i> | 133 | 171  | 303  |
| LbrM25_V2.0290 | <i>L. braziliensis</i> | 165 | 430  | 594  |
| LbrM25_V2.0310 | <i>L. braziliensis</i> | 138 | 241  | 378  |

|                |                        |     |      |      |
|----------------|------------------------|-----|------|------|
| LbrM25_V2.0310 | <i>L. braziliensis</i> | 43  | 509  | 551  |
| LbrM25_V2.0310 | <i>L. braziliensis</i> | 83  | 596  | 678  |
| LbrM25_V2.0310 | <i>L. braziliensis</i> | 120 | 689  | 808  |
| LbrM25_V2.0310 | <i>L. braziliensis</i> | 173 | 911  | 1083 |
| LbrM25_V2.0330 | <i>L. braziliensis</i> | 490 | 1    | 490  |
| LbrM25_V2.0360 | <i>L. braziliensis</i> | 126 | 1    | 126  |
| LbrM25_V2.0370 | <i>L. braziliensis</i> | 236 | 15   | 250  |
| LbrM25_V2.0370 | <i>L. braziliensis</i> | 115 | 528  | 642  |
| LbrM25_V2.0370 | <i>L. braziliensis</i> | 342 | 646  | 987  |
| LbrM25_V2.0370 | <i>L. braziliensis</i> | 58  | 1005 | 1062 |
| LbrM25_V2.0370 | <i>L. braziliensis</i> | 588 | 1183 | 1770 |
| LbrM25_V2.0380 | <i>L. braziliensis</i> | 156 | 32   | 187  |
| LbrM25_V2.0390 | <i>L. braziliensis</i> | 43  | 45   | 87   |
| LbrM25_V2.0390 | <i>L. braziliensis</i> | 59  | 268  | 326  |
| LbrM25_V2.0390 | <i>L. braziliensis</i> | 91  | 376  | 466  |
| LbrM25_V2.0390 | <i>L. braziliensis</i> | 61  | 499  | 559  |
| LbrM25_V2.0390 | <i>L. braziliensis</i> | 53  | 613  | 665  |
| LbrM25_V2.0400 | <i>L. braziliensis</i> | 89  | 1    | 89   |
| LbrM25_V2.0410 | <i>L. braziliensis</i> | 61  | 1    | 61   |
| LbrM25_V2.0420 | <i>L. braziliensis</i> | 48  | 981  | 1028 |
| LbrM25_V2.0430 | <i>L. braziliensis</i> | 40  | 359  | 398  |
| LbrM25_V2.0430 | <i>L. braziliensis</i> | 55  | 436  | 490  |
| LbrM25_V2.0430 | <i>L. braziliensis</i> | 44  | 697  | 740  |
| LbrM25_V2.0430 | <i>L. braziliensis</i> | 46  | 823  | 868  |
| LbrM25_V2.0430 | <i>L. braziliensis</i> | 56  | 1012 | 1067 |
| LbrM25_V2.0430 | <i>L. braziliensis</i> | 83  | 1139 | 1221 |
| LbrM25_V2.0430 | <i>L. braziliensis</i> | 90  | 1256 | 1345 |
| LbrM25_V2.0430 | <i>L. braziliensis</i> | 113 | 1359 | 1471 |
| LbrM25_V2.0440 | <i>L. braziliensis</i> | 64  | 105  | 168  |
| LbrM25_V2.0450 | <i>L. braziliensis</i> | 64  | 106  | 169  |
| LbrM25_V2.0460 | <i>L. braziliensis</i> | 54  | 115  | 168  |
| LbrM25_V2.0470 | <i>L. braziliensis</i> | 111 | 129  | 239  |
| LbrM25_V2.0480 | <i>L. braziliensis</i> | 59  | 1    | 59   |
| LbrM25_V2.0490 | <i>L. braziliensis</i> | 57  | 63   | 119  |
| LbrM25_V2.0490 | <i>L. braziliensis</i> | 90  | 190  | 279  |
| LbrM25_V2.0490 | <i>L. braziliensis</i> | 68  | 509  | 576  |
| LbrM25_V2.0490 | <i>L. braziliensis</i> | 81  | 597  | 677  |
| LbrM25_V2.0490 | <i>L. braziliensis</i> | 109 | 717  | 825  |
| LbrM25_V2.0490 | <i>L. braziliensis</i> | 45  | 886  | 930  |
| LbrM25_V2.0490 | <i>L. braziliensis</i> | 44  | 1001 | 1044 |
| LbrM25_V2.0490 | <i>L. braziliensis</i> | 57  | 1129 | 1185 |
| LbrM25_V2.0500 | <i>L. braziliensis</i> | 422 | 142  | 563  |
| LbrM25_V2.0510 | <i>L. braziliensis</i> | 318 | 1    | 318  |
| LbrM25_V2.0510 | <i>L. braziliensis</i> | 81  | 323  | 403  |
| LbrM25_V2.0510 | <i>L. braziliensis</i> | 360 | 429  | 788  |
| LbrM25_V2.0510 | <i>L. braziliensis</i> | 92  | 839  | 930  |
| LbrM25_V2.0510 | <i>L. braziliensis</i> | 169 | 951  | 1119 |

|                |                        |     |      |      |
|----------------|------------------------|-----|------|------|
| LbrM25_V2.0510 | <i>L. braziliensis</i> | 128 | 1347 | 1474 |
| LbrM25_V2.0510 | <i>L. braziliensis</i> | 215 | 1509 | 1723 |
| LbrM25_V2.0520 | <i>L. braziliensis</i> | 55  | 448  | 502  |
| LbrM25_V2.0520 | <i>L. braziliensis</i> | 106 | 522  | 627  |
| LbrM25_V2.0530 | <i>L. braziliensis</i> | 111 | 109  | 219  |
| LbrM25_V2.0530 | <i>L. braziliensis</i> | 85  | 345  | 429  |
| LbrM25_V2.0540 | <i>L. braziliensis</i> | 66  | 50   | 115  |
| LbrM25_V2.0540 | <i>L. braziliensis</i> | 84  | 305  | 388  |
| LbrM25_V2.0560 | <i>L. braziliensis</i> | 80  | 201  | 280  |
| LbrM25_V2.0570 | <i>L. braziliensis</i> | 95  | 24   | 118  |
| LbrM25_V2.0580 | <i>L. braziliensis</i> | 43  | 100  | 142  |
| LbrM25_V2.0590 | <i>L. braziliensis</i> | 43  | 100  | 142  |
| LbrM25_V2.0600 | <i>L. braziliensis</i> | 43  | 100  | 142  |
| LbrM25_V2.0610 | <i>L. braziliensis</i> | 43  | 100  | 142  |
| LbrM25_V2.0620 | <i>L. braziliensis</i> | 75  | 82   | 156  |
| LbrM25_V2.0620 | <i>L. braziliensis</i> | 139 | 293  | 431  |
| LbrM25_V2.0620 | <i>L. braziliensis</i> | 69  | 443  | 511  |
| LbrM25_V2.0620 | <i>L. braziliensis</i> | 83  | 848  | 930  |
| LbrM25_V2.0630 | <i>L. braziliensis</i> | 77  | 289  | 365  |
| LbrM25_V2.0640 | <i>L. braziliensis</i> | 49  | 20   | 68   |
| LbrM25_V2.0650 | <i>L. braziliensis</i> | 76  | 1    | 76   |
| LbrM25_V2.0650 | <i>L. braziliensis</i> | 56  | 146  | 201  |
| LbrM25_V2.0650 | <i>L. braziliensis</i> | 77  | 309  | 385  |
| LbrM25_V2.0660 | <i>L. braziliensis</i> | 59  | 83   | 141  |
| LbrM25_V2.0660 | <i>L. braziliensis</i> | 132 | 212  | 343  |
| LbrM25_V2.0670 | <i>L. braziliensis</i> | 52  | 12   | 63   |
| LbrM25_V2.0670 | <i>L. braziliensis</i> | 97  | 247  | 343  |
| LbrM25_V2.0670 | <i>L. braziliensis</i> | 43  | 666  | 708  |
| LbrM25_V2.0670 | <i>L. braziliensis</i> | 86  | 749  | 834  |
| LbrM25_V2.0680 | <i>L. braziliensis</i> | 111 | 16   | 126  |
| LbrM25_V2.0690 | <i>L. braziliensis</i> | 75  | 184  | 258  |
| LbrM25_V2.0690 | <i>L. braziliensis</i> | 127 | 296  | 422  |
| LbrM25_V2.0690 | <i>L. braziliensis</i> | 45  | 645  | 689  |
| LbrM25_V2.0690 | <i>L. braziliensis</i> | 42  | 720  | 761  |
| LbrM25_V2.0690 | <i>L. braziliensis</i> | 50  | 788  | 837  |
| LbrM25_V2.0690 | <i>L. braziliensis</i> | 101 | 887  | 987  |
| LbrM25_V2.0710 | <i>L. braziliensis</i> | 112 | 47   | 158  |
| LbrM25_V2.0710 | <i>L. braziliensis</i> | 122 | 288  | 409  |
| LbrM25_V2.0710 | <i>L. braziliensis</i> | 71  | 547  | 617  |
| LbrM25_V2.0710 | <i>L. braziliensis</i> | 190 | 792  | 981  |
| LbrM25_V2.0720 | <i>L. braziliensis</i> | 43  | 108  | 150  |
| LbrM25_V2.0720 | <i>L. braziliensis</i> | 154 | 267  | 420  |
| LbrM25_V2.0730 | <i>L. braziliensis</i> | 72  | 49   | 120  |
| LbrM25_V2.0730 | <i>L. braziliensis</i> | 42  | 182  | 223  |
| LbrM25_V2.0730 | <i>L. braziliensis</i> | 40  | 286  | 325  |
| LbrM25_V2.0730 | <i>L. braziliensis</i> | 442 | 378  | 819  |
| LbrM25_V2.0730 | <i>L. braziliensis</i> | 106 | 837  | 942  |

|                |                        |     |      |      |
|----------------|------------------------|-----|------|------|
| LbrM25_V2.0730 | <i>L. braziliensis</i> | 223 | 948  | 1170 |
| LbrM25_V2.0740 | <i>L. braziliensis</i> | 328 | 1    | 328  |
| LbrM25_V2.0740 | <i>L. braziliensis</i> | 55  | 505  | 559  |
| LbrM25_V2.0740 | <i>L. braziliensis</i> | 211 | 637  | 847  |
| LbrM25_V2.0740 | <i>L. braziliensis</i> | 229 | 891  | 1119 |
| LbrM25_V2.0760 | <i>L. braziliensis</i> | 88  | 128  | 215  |
| LbrM25_V2.0760 | <i>L. braziliensis</i> | 358 | 247  | 604  |
| LbrM25_V2.0760 | <i>L. braziliensis</i> | 68  | 663  | 730  |
| LbrM25_V2.0760 | <i>L. braziliensis</i> | 103 | 732  | 834  |
| LbrM25_V2.0760 | <i>L. braziliensis</i> | 165 | 857  | 1021 |
| LbrM25_V2.0760 | <i>L. braziliensis</i> | 231 | 1064 | 1294 |
| LbrM25_V2.0770 | <i>L. braziliensis</i> | 47  | 1    | 47   |
| LbrM25_V2.0780 | <i>L. braziliensis</i> | 73  | 118  | 190  |
| LbrM25_V2.0780 | <i>L. braziliensis</i> | 59  | 270  | 328  |
| LbrM25_V2.0790 | <i>L. braziliensis</i> | 95  | 88   | 182  |
| LbrM25_V2.0800 | <i>L. braziliensis</i> | 181 | 1    | 181  |
| LbrM25_V2.0800 | <i>L. braziliensis</i> | 196 | 346  | 541  |
| LbrM25_V2.0800 | <i>L. braziliensis</i> | 82  | 550  | 631  |
| LbrM25_V2.0800 | <i>L. braziliensis</i> | 149 | 688  | 836  |
| LbrM25_V2.0820 | <i>L. braziliensis</i> | 207 | 1    | 207  |
| LbrM25_V2.0820 | <i>L. braziliensis</i> | 54  | 232  | 285  |
| LbrM25_V2.0820 | <i>L. braziliensis</i> | 189 | 316  | 504  |
| LbrM25_V2.0830 | <i>L. braziliensis</i> | 115 | 213  | 327  |
| LbrM25_V2.0830 | <i>L. braziliensis</i> | 43  | 335  | 377  |
| LbrM25_V2.0830 | <i>L. braziliensis</i> | 43  | 335  | 377  |
| LbrM25_V2.0850 | <i>L. braziliensis</i> | 378 | 87   | 464  |
| LbrM25_V2.0850 | <i>L. braziliensis</i> | 80  | 506  | 585  |
| LbrM25_V2.0850 | <i>L. braziliensis</i> | 337 | 624  | 960  |
| LbrM25_V2.0850 | <i>L. braziliensis</i> | 107 | 1005 | 1111 |
| LbrM25_V2.0850 | <i>L. braziliensis</i> | 40  | 1174 | 1213 |
| LbrM25_V2.0860 | <i>L. braziliensis</i> | 44  | 2920 | 2963 |
| LbrM25_V2.0860 | <i>L. braziliensis</i> | 94  | 3239 | 3332 |
| LbrM25_V2.0860 | <i>L. braziliensis</i> | 68  | 3487 | 3554 |
| LbrM25_V2.0860 | <i>L. braziliensis</i> | 42  | 3666 | 3707 |
| LbrM25_V2.0860 | <i>L. braziliensis</i> | 73  | 3778 | 3850 |
| LbrM25_V2.0880 | <i>L. braziliensis</i> | 244 | 1    | 244  |
| LbrM25_V2.0880 | <i>L. braziliensis</i> | 44  | 272  | 315  |
| LbrM25_V2.0880 | <i>L. braziliensis</i> | 42  | 387  | 428  |
| LbrM25_V2.0890 | <i>L. braziliensis</i> | 54  | 272  | 325  |
| LbrM25_V2.0910 | <i>L. braziliensis</i> | 61  | 236  | 296  |
| LbrM25_V2.0910 | <i>L. braziliensis</i> | 100 | 329  | 428  |
| LbrM25_V2.0920 | <i>L. braziliensis</i> | 74  | 1    | 74   |
| LbrM25_V2.0920 | <i>L. braziliensis</i> | 49  | 223  | 271  |
| LbrM25_V2.0920 | <i>L. braziliensis</i> | 41  | 402  | 442  |
| LbrM25_V2.0920 | <i>L. braziliensis</i> | 67  | 565  | 631  |
| LbrM25_V2.0920 | <i>L. braziliensis</i> | 53  | 743  | 795  |
| LbrM25_V2.0930 | <i>L. braziliensis</i> | 268 | 1    | 268  |



|                |                        |     |      |      |
|----------------|------------------------|-----|------|------|
| LbrM25_V2.0930 | <i>L. braziliensis</i> | 396 | 455  | 850  |
| LbrM25_V2.0950 | <i>L. braziliensis</i> | 373 | 1    | 373  |
| LbrM25_V2.0950 | <i>L. braziliensis</i> | 276 | 469  | 744  |
| LbrM25_V2.0960 | <i>L. braziliensis</i> | 459 | 1    | 459  |
| LbrM25_V2.0960 | <i>L. braziliensis</i> | 87  | 537  | 623  |
| LbrM25_V2.0960 | <i>L. braziliensis</i> | 180 | 708  | 887  |
| LbrM25_V2.0970 | <i>L. braziliensis</i> | 41  | 42   | 82   |
| LbrM25_V2.0970 | <i>L. braziliensis</i> | 279 | 163  | 441  |
| LbrM25_V2.1000 | <i>L. braziliensis</i> | 647 | 1    | 647  |
| LbrM25_V2.1000 | <i>L. braziliensis</i> | 194 | 683  | 876  |
| LbrM25_V2.1000 | <i>L. braziliensis</i> | 113 | 897  | 1009 |
| LbrM25_V2.1000 | <i>L. braziliensis</i> | 178 | 1076 | 1253 |
| LbrM25_V2.1000 | <i>L. braziliensis</i> | 74  | 1270 | 1343 |
| LbrM25_V2.1000 | <i>L. braziliensis</i> | 57  | 1550 | 1606 |
| LbrM25_V2.1000 | <i>L. braziliensis</i> | 104 | 1640 | 1743 |
| LbrM25_V2.1000 | <i>L. braziliensis</i> | 61  | 1782 | 1842 |
| LbrM25_V2.1000 | <i>L. braziliensis</i> | 46  | 2383 | 2428 |
| LbrM25_V2.1000 | <i>L. braziliensis</i> | 91  | 2964 | 3054 |
| LbrM25_V2.1000 | <i>L. braziliensis</i> | 59  | 3102 | 3160 |
| LbrM25_V2.1000 | <i>L. braziliensis</i> | 54  | 3204 | 3257 |
| LbrM25_V2.1000 | <i>L. braziliensis</i> | 55  | 3425 | 3479 |
| LbrM25_V2.1000 | <i>L. braziliensis</i> | 79  | 3570 | 3648 |
| LbrM25_V2.1000 | <i>L. braziliensis</i> | 113 | 3718 | 3830 |
| LbrM25_V2.1000 | <i>L. braziliensis</i> | 65  | 3892 | 3956 |
| LbrM25_V2.1000 | <i>L. braziliensis</i> | 66  | 4124 | 4189 |
| LbrM25_V2.1000 | <i>L. braziliensis</i> | 72  | 4566 | 4637 |
| LbrM25_V2.1000 | <i>L. braziliensis</i> | 65  | 4694 | 4758 |
| LbrM25_V2.1000 | <i>L. braziliensis</i> | 124 | 4802 | 4925 |
| LbrM25_V2.1000 | <i>L. braziliensis</i> | 45  | 4951 | 4995 |
| LbrM25_V2.1000 | <i>L. braziliensis</i> | 47  | 5111 | 5157 |
| LbrM25_V2.1000 | <i>L. braziliensis</i> | 53  | 5186 | 5238 |
| LbrM25_V2.1000 | <i>L. braziliensis</i> | 61  | 5425 | 5485 |
| LbrM25_V2.1000 | <i>L. braziliensis</i> | 85  | 5516 | 5600 |
| LbrM25_V2.1000 | <i>L. braziliensis</i> | 69  | 5779 | 5847 |
| LbrM25_V2.1000 | <i>L. braziliensis</i> | 77  | 5972 | 6048 |
| LbrM25_V2.1000 | <i>L. braziliensis</i> | 40  | 6057 | 6096 |
| LbrM25_V2.1000 | <i>L. braziliensis</i> | 94  | 6136 | 6229 |
| LbrM25_V2.1020 | <i>L. braziliensis</i> | 89  | 678  | 766  |
| LbrM25_V2.1020 | <i>L. braziliensis</i> | 46  | 1023 | 1068 |
| LbrM25_V2.1030 | <i>L. braziliensis</i> | 73  | 146  | 218  |
| LbrM25_V2.1030 | <i>L. braziliensis</i> | 116 | 285  | 400  |
| LbrM25_V2.1030 | <i>L. braziliensis</i> | 119 | 562  | 680  |
| LbrM25_V2.1040 | <i>L. braziliensis</i> | 44  | 1    | 44   |
| LbrM25_V2.1050 | <i>L. braziliensis</i> | 249 | 27   | 275  |
| LbrM25_V2.1050 | <i>L. braziliensis</i> | 102 | 388  | 489  |
| LbrM25_V2.1050 | <i>L. braziliensis</i> | 41  | 715  | 755  |
| LbrM25_V2.1050 | <i>L. braziliensis</i> | 74  | 1178 | 1251 |

|                |                        |     |      |      |
|----------------|------------------------|-----|------|------|
| LbrM25_V2.1050 | <i>L. braziliensis</i> | 69  | 1646 | 1714 |
| LbrM25_V2.1050 | <i>L. braziliensis</i> | 71  | 1923 | 1993 |
| LbrM25_V2.1050 | <i>L. braziliensis</i> | 43  | 2035 | 2077 |
| LbrM25_V2.1050 | <i>L. braziliensis</i> | 73  | 2110 | 2182 |
| LbrM25_V2.1060 | <i>L. braziliensis</i> | 50  | 57   | 106  |
| LbrM25_V2.1060 | <i>L. braziliensis</i> | 89  | 150  | 238  |
| LbrM25_V2.1060 | <i>L. braziliensis</i> | 44  | 473  | 516  |
| LbrM25_V2.1060 | <i>L. braziliensis</i> | 66  | 555  | 620  |
| LbrM25_V2.1060 | <i>L. braziliensis</i> | 79  | 624  | 702  |
| LbrM25_V2.1060 | <i>L. braziliensis</i> | 44  | 746  | 789  |
| LbrM25_V2.1060 | <i>L. braziliensis</i> | 83  | 837  | 919  |
| LbrM25_V2.1070 | <i>L. braziliensis</i> | 58  | 101  | 158  |
| LbrM25_V2.1070 | <i>L. braziliensis</i> | 71  | 212  | 282  |
| LbrM25_V2.1070 | <i>L. braziliensis</i> | 84  | 388  | 471  |
| LbrM25_V2.1080 | <i>L. braziliensis</i> | 63  | 39   | 101  |
| LbrM25_V2.1080 | <i>L. braziliensis</i> | 99  | 131  | 229  |
| LbrM25_V2.1120 | <i>L. braziliensis</i> | 127 | 77   | 203  |
| LbrM25_V2.1120 | <i>L. braziliensis</i> | 145 | 226  | 370  |
| LbrM25_V2.1120 | <i>L. braziliensis</i> | 55  | 411  | 465  |
| LbrM25_V2.1120 | <i>L. braziliensis</i> | 59  | 512  | 570  |
| LbrM25_V2.1130 | <i>L. braziliensis</i> | 56  | 1    | 56   |
| LbrM25_V2.1160 | <i>L. braziliensis</i> | 40  | 1    | 40   |
| LbrM25_V2.1170 | <i>L. braziliensis</i> | 91  | 64   | 154  |
| LbrM25_V2.1170 | <i>L. braziliensis</i> | 56  | 267  | 322  |
| LbrM25_V2.1170 | <i>L. braziliensis</i> | 49  | 382  | 430  |
| LbrM25_V2.1170 | <i>L. braziliensis</i> | 66  | 617  | 682  |
| LbrM25_V2.1170 | <i>L. braziliensis</i> | 63  | 716  | 778  |
| LbrM25_V2.1180 | <i>L. braziliensis</i> | 254 | 1    | 254  |
| LbrM25_V2.1180 | <i>L. braziliensis</i> | 52  | 872  | 923  |
| LbrM25_V2.1190 | <i>L. braziliensis</i> | 49  | 85   | 133  |
| LbrM25_V2.1190 | <i>L. braziliensis</i> | 46  | 365  | 410  |
| LbrM25_V2.1190 | <i>L. braziliensis</i> | 46  | 365  | 410  |
| LbrM25_V2.1200 | <i>L. braziliensis</i> | 95  | 1    | 95   |
| LbrM25_V2.1200 | <i>L. braziliensis</i> | 94  | 142  | 235  |
| LbrM25_V2.1200 | <i>L. braziliensis</i> | 129 | 433  | 561  |
| LbrM25_V2.1200 | <i>L. braziliensis</i> | 43  | 647  | 689  |
| LbrM25_V2.1200 | <i>L. braziliensis</i> | 55  | 832  | 886  |
| LbrM25_V2.1200 | <i>L. braziliensis</i> | 89  | 1010 | 1098 |
| LbrM25_V2.1200 | <i>L. braziliensis</i> | 85  | 1372 | 1456 |
| LbrM25_V2.1200 | <i>L. braziliensis</i> | 85  | 1612 | 1696 |
| LbrM25_V2.1200 | <i>L. braziliensis</i> | 43  | 1788 | 1830 |
| LbrM25_V2.1210 | <i>L. braziliensis</i> | 48  | 40   | 87   |
| LbrM25_V2.1210 | <i>L. braziliensis</i> | 106 | 157  | 262  |
| LbrM25_V2.1210 | <i>L. braziliensis</i> | 138 | 423  | 560  |
| LbrM25_V2.1210 | <i>L. braziliensis</i> | 51  | 565  | 615  |
| LbrM25_V2.1210 | <i>L. braziliensis</i> | 66  | 736  | 801  |
| LbrM25_V2.1210 | <i>L. braziliensis</i> | 81  | 909  | 989  |

|                |                        |     |      |      |
|----------------|------------------------|-----|------|------|
| LbrM25_V2.1210 | <i>L. braziliensis</i> | 138 | 1432 | 1569 |
| LbrM25_V2.1210 | <i>L. braziliensis</i> | 43  | 1643 | 1685 |
| LbrM25_V2.1210 | <i>L. braziliensis</i> | 74  | 1700 | 1773 |
| LbrM25_V2.1220 | <i>L. braziliensis</i> | 66  | 97   | 162  |
| LbrM25_V2.1220 | <i>L. braziliensis</i> | 97  | 192  | 288  |
| LbrM25_V2.1220 | <i>L. braziliensis</i> | 120 | 322  | 441  |
| LbrM25_V2.1220 | <i>L. braziliensis</i> | 40  | 505  | 544  |
| LbrM25_V2.1220 | <i>L. braziliensis</i> | 122 | 715  | 836  |
| LbrM25_V2.1220 | <i>L. braziliensis</i> | 60  | 874  | 933  |
| LbrM25_V2.1220 | <i>L. braziliensis</i> | 279 | 1020 | 1298 |
| LbrM25_V2.1220 | <i>L. braziliensis</i> | 67  | 1364 | 1430 |
| LbrM25_V2.1220 | <i>L. braziliensis</i> | 85  | 1457 | 1541 |
| LbrM25_V2.1220 | <i>L. braziliensis</i> | 40  | 1711 | 1750 |
| LbrM25_V2.1220 | <i>L. braziliensis</i> | 89  | 1821 | 1909 |
| LbrM25_V2.1220 | <i>L. braziliensis</i> | 198 | 2013 | 2210 |
| LbrM25_V2.1230 | <i>L. braziliensis</i> | 57  | 91   | 147  |
| LbrM25_V2.1230 | <i>L. braziliensis</i> | 62  | 174  | 235  |
| LbrM25_V2.1230 | <i>L. braziliensis</i> | 58  | 245  | 302  |
| LbrM25_V2.1230 | <i>L. braziliensis</i> | 158 | 328  | 485  |
| LbrM25_V2.1240 | <i>L. braziliensis</i> | 60  | 1    | 60   |
| LbrM25_V2.1240 | <i>L. braziliensis</i> | 59  | 250  | 308  |
| LbrM25_V2.1240 | <i>L. braziliensis</i> | 78  | 545  | 622  |
| LbrM25_V2.1240 | <i>L. braziliensis</i> | 40  | 713  | 752  |
| LbrM25_V2.1240 | <i>L. braziliensis</i> | 71  | 892  | 962  |
| LbrM25_V2.1260 | <i>L. braziliensis</i> | 60  | 15   | 74   |
| LbrM25_V2.1260 | <i>L. braziliensis</i> | 73  | 135  | 207  |
| LbrM25_V2.1260 | <i>L. braziliensis</i> | 47  | 457  | 503  |
| LbrM25_V2.1260 | <i>L. braziliensis</i> | 92  | 543  | 634  |
| LbrM25_V2.1270 | <i>L. braziliensis</i> | 87  | 1    | 87   |
| LbrM25_V2.1270 | <i>L. braziliensis</i> | 70  | 117  | 186  |
| LbrM25_V2.1320 | <i>L. braziliensis</i> | 40  | 211  | 250  |
| LbrM25_V2.1320 | <i>L. braziliensis</i> | 62  | 643  | 704  |
| LbrM25_V2.1320 | <i>L. braziliensis</i> | 62  | 643  | 704  |
| LbrM25_V2.1350 | <i>L. braziliensis</i> | 81  | 123  | 203  |
| LbrM25_V2.1360 | <i>L. braziliensis</i> | 125 | 224  | 348  |
| LbrM25_V2.1360 | <i>L. braziliensis</i> | 119 | 412  | 530  |
| LbrM25_V2.1360 | <i>L. braziliensis</i> | 290 | 563  | 852  |
| LbrM25_V2.1370 | <i>L. braziliensis</i> | 57  | 1    | 57   |
| LbrM25_V2.1380 | <i>L. braziliensis</i> | 91  | 1    | 91   |
| LbrM25_V2.1380 | <i>L. braziliensis</i> | 746 | 101  | 846  |
| LbrM25_V2.1390 | <i>L. braziliensis</i> | 49  | 1    | 49   |
| LbrM25_V2.1390 | <i>L. braziliensis</i> | 181 | 69   | 249  |
| LbrM25_V2.1390 | <i>L. braziliensis</i> | 94  | 260  | 353  |
| LbrM25_V2.1390 | <i>L. braziliensis</i> | 71  | 379  | 449  |
| LbrM25_V2.1390 | <i>L. braziliensis</i> | 150 | 604  | 753  |
| LbrM25_V2.1390 | <i>L. braziliensis</i> | 188 | 763  | 950  |
| LbrM25_V2.1400 | <i>L. braziliensis</i> | 154 | 11   | 164  |

|                |                        |     |      |      |
|----------------|------------------------|-----|------|------|
| LbrM25_V2.1400 | <i>L. braziliensis</i> | 324 | 184  | 507  |
| LbrM25_V2.1410 | <i>L. braziliensis</i> | 101 | 40   | 140  |
| LbrM25_V2.1410 | <i>L. braziliensis</i> | 71  | 155  | 225  |
| LbrM25_V2.1430 | <i>L. braziliensis</i> | 93  | 121  | 213  |
| LbrM25_V2.1450 | <i>L. braziliensis</i> | 120 | 1    | 120  |
| LbrM25_V2.1470 | <i>L. braziliensis</i> | 41  | 166  | 206  |
| LbrM25_V2.1470 | <i>L. braziliensis</i> | 65  | 246  | 310  |
| LbrM25_V2.1470 | <i>L. braziliensis</i> | 65  | 246  | 310  |
| LbrM25_V2.1480 | <i>L. braziliensis</i> | 107 | 1    | 107  |
| LbrM25_V2.1490 | <i>L. braziliensis</i> | 45  | 71   | 115  |
| LbrM25_V2.1500 | <i>L. braziliensis</i> | 45  | 516  | 560  |
| LbrM25_V2.1510 | <i>L. braziliensis</i> | 79  | 317  | 395  |
| LbrM25_V2.1510 | <i>L. braziliensis</i> | 240 | 473  | 712  |
| LbrM25_V2.1510 | <i>L. braziliensis</i> | 57  | 749  | 805  |
| LbrM25_V2.1510 | <i>L. braziliensis</i> | 176 | 870  | 1045 |
| LbrM25_V2.1520 | <i>L. braziliensis</i> | 40  | 33   | 72   |
| LbrM25_V2.1530 | <i>L. braziliensis</i> | 78  | 1    | 78   |
| LbrM25_V2.1530 | <i>L. braziliensis</i> | 133 | 457  | 589  |
| LbrM25_V2.1530 | <i>L. braziliensis</i> | 126 | 612  | 737  |
| LbrM25_V2.1530 | <i>L. braziliensis</i> | 215 | 780  | 994  |
| LbrM25_V2.1540 | <i>L. braziliensis</i> | 40  | 128  | 167  |
| LbrM25_V2.1540 | <i>L. braziliensis</i> | 332 | 741  | 1072 |
| LbrM25_V2.1540 | <i>L. braziliensis</i> | 93  | 1076 | 1168 |
| LbrM25_V2.1540 | <i>L. braziliensis</i> | 272 | 1174 | 1445 |
| LbrM25_V2.1550 | <i>L. braziliensis</i> | 40  | 232  | 271  |
| LbrM25_V2.1550 | <i>L. braziliensis</i> | 50  | 378  | 427  |
| LbrM25_V2.1550 | <i>L. braziliensis</i> | 102 | 448  | 549  |
| LbrM25_V2.1560 | <i>L. braziliensis</i> | 55  | 257  | 311  |
| LbrM25_V2.1560 | <i>L. braziliensis</i> | 95  | 403  | 497  |
| LbrM25_V2.1560 | <i>L. braziliensis</i> | 87  | 809  | 895  |
| LbrM25_V2.1590 | <i>L. braziliensis</i> | 174 | 1    | 174  |
| LbrM25_V2.1610 | <i>L. braziliensis</i> | 131 | 1    | 131  |
| LbrM25_V2.1610 | <i>L. braziliensis</i> | 116 | 654  | 769  |
| LbrM25_V2.1610 | <i>L. braziliensis</i> | 82  | 893  | 974  |
| LbrM25_V2.1620 | <i>L. braziliensis</i> | 81  | 1    | 81   |
| LbrM25_V2.1630 | <i>L. braziliensis</i> | 102 | 131  | 232  |
| LbrM25_V2.1660 | <i>L. braziliensis</i> | 88  | 1    | 88   |
| LbrM25_V2.1670 | <i>L. braziliensis</i> | 76  | 285  | 360  |
| LbrM25_V2.1690 | <i>L. braziliensis</i> | 86  | 1    | 86   |
| LbrM25_V2.1690 | <i>L. braziliensis</i> | 63  | 149  | 211  |
| LbrM25_V2.1700 | <i>L. braziliensis</i> | 80  | 221  | 300  |
| LbrM25_V2.1710 | <i>L. braziliensis</i> | 80  | 221  | 300  |
| LbrM25_V2.1720 | <i>L. braziliensis</i> | 44  | 383  | 426  |
| LbrM25_V2.1730 | <i>L. braziliensis</i> | 101 | 24   | 124  |
| LbrM25_V2.1740 | <i>L. braziliensis</i> | 59  | 243  | 301  |
| LbrM25_V2.1770 | <i>L. braziliensis</i> | 136 | 174  | 309  |
| LbrM25_V2.1770 | <i>L. braziliensis</i> | 48  | 330  | 377  |

|                |                        |     |      |      |
|----------------|------------------------|-----|------|------|
| LbrM25_V2.1780 | <i>L. braziliensis</i> | 111 | 111  | 221  |
| LbrM25_V2.1800 | <i>L. braziliensis</i> | 71  | 379  | 449  |
| LbrM25_V2.1800 | <i>L. braziliensis</i> | 58  | 489  | 546  |
| LbrM25_V2.1800 | <i>L. braziliensis</i> | 48  | 585  | 632  |
| LbrM25_V2.1820 | <i>L. braziliensis</i> | 52  | 22   | 73   |
| LbrM25_V2.1830 | <i>L. braziliensis</i> | 42  | 378  | 419  |
| LbrM25_V2.1840 | <i>L. braziliensis</i> | 42  | 1    | 42   |
| LbrM25_V2.1850 | <i>L. braziliensis</i> | 42  | 123  | 164  |
| LbrM25_V2.1890 | <i>L. braziliensis</i> | 59  | 62   | 120  |
| LbrM25_V2.1890 | <i>L. braziliensis</i> | 123 | 261  | 383  |
| LbrM25_V2.1900 | <i>L. braziliensis</i> | 47  | 362  | 408  |
| LbrM25_V2.1900 | <i>L. braziliensis</i> | 41  | 508  | 548  |
| LbrM25_V2.1900 | <i>L. braziliensis</i> | 41  | 508  | 548  |
| LbrM25_V2.1930 | <i>L. braziliensis</i> | 47  | 1    | 47   |
| LbrM25_V2.1930 | <i>L. braziliensis</i> | 50  | 340  | 389  |
| LbrM25_V2.1940 | <i>L. braziliensis</i> | 90  | 48   | 137  |
| LbrM25_V2.1950 | <i>L. braziliensis</i> | 57  | 1    | 57   |
| LbrM25_V2.1950 | <i>L. braziliensis</i> | 90  | 488  | 577  |
| LbrM25_V2.2000 | <i>L. braziliensis</i> | 301 | 395  | 695  |
| LbrM25_V2.2030 | <i>L. braziliensis</i> | 200 | 300  | 499  |
| LbrM25_V2.2040 | <i>L. braziliensis</i> | 65  | 184  | 248  |
| LbrM25_V2.2040 | <i>L. braziliensis</i> | 211 | 270  | 480  |
| LbrM25_V2.2060 | <i>L. braziliensis</i> | 68  | 77   | 144  |
| LbrM25_V2.2060 | <i>L. braziliensis</i> | 40  | 475  | 514  |
| LbrM25_V2.2060 | <i>L. braziliensis</i> | 40  | 475  | 514  |
| LbrM25_V2.2070 | <i>L. braziliensis</i> | 71  | 72   | 142  |
| LbrM25_V2.2070 | <i>L. braziliensis</i> | 104 | 291  | 394  |
| LbrM25_V2.2080 | <i>L. braziliensis</i> | 262 | 1    | 262  |
| LbrM25_V2.2100 | <i>L. braziliensis</i> | 54  | 58   | 111  |
| LbrM25_V2.2100 | <i>L. braziliensis</i> | 79  | 392  | 470  |
| LbrM25_V2.2100 | <i>L. braziliensis</i> | 79  | 392  | 470  |
| LbrM25_V2.2140 | <i>L. braziliensis</i> | 98  | 1    | 98   |
| LbrM25_V2.2140 | <i>L. braziliensis</i> | 82  | 596  | 677  |
| LbrM25_V2.2140 | <i>L. braziliensis</i> | 52  | 1023 | 1074 |
| LbrM25_V2.2150 | <i>L. braziliensis</i> | 54  | 51   | 104  |
| LbrM25_V2.2170 | <i>L. braziliensis</i> | 43  | 148  | 190  |
| LbrM25_V2.2180 | <i>L. braziliensis</i> | 105 | 84   | 188  |
| LbrM25_V2.2200 | <i>L. braziliensis</i> | 71  | 49   | 119  |
| LbrM25_V2.2210 | <i>L. braziliensis</i> | 220 | 75   | 294  |
| LbrM25_V2.2220 | <i>L. braziliensis</i> | 47  | 34   | 80   |
| LbrM25_V2.2230 | <i>L. braziliensis</i> | 130 | 43   | 172  |
| LbrM25_V2.2230 | <i>L. braziliensis</i> | 77  | 266  | 342  |
| LbrM25_V2.2230 | <i>L. braziliensis</i> | 62  | 363  | 424  |
| LbrM25_V2.2250 | <i>L. braziliensis</i> | 80  | 28   | 107  |
| LbrM25_V2.2250 | <i>L. braziliensis</i> | 132 | 180  | 311  |
| LbrM25_V2.2260 | <i>L. braziliensis</i> | 66  | 21   | 86   |
| LbrM25_V2.2260 | <i>L. braziliensis</i> | 58  | 149  | 206  |

|                |                        |     |      |      |
|----------------|------------------------|-----|------|------|
| LbrM25_V2.2270 | <i>L. braziliensis</i> | 81  | 188  | 268  |
| LbrM25_V2.2270 | <i>L. braziliensis</i> | 61  | 1175 | 1235 |
| LbrM25_V2.2270 | <i>L. braziliensis</i> | 96  | 1464 | 1559 |
| LbrM25_V2.2300 | <i>L. braziliensis</i> | 47  | 1    | 47   |
| LbrM25_V2.2300 | <i>L. braziliensis</i> | 102 | 228  | 329  |
| LbrM25_V2.2300 | <i>L. braziliensis</i> | 262 | 354  | 615  |
| LbrM25_V2.2300 | <i>L. braziliensis</i> | 98  | 707  | 804  |
| LbrM25_V2.2300 | <i>L. braziliensis</i> | 61  | 821  | 881  |
| LbrM25_V2.2300 | <i>L. braziliensis</i> | 103 | 928  | 1030 |
| LbrM25_V2.2310 | <i>L. braziliensis</i> | 44  | 54   | 97   |
| LbrM25_V2.2310 | <i>L. braziliensis</i> | 47  | 125  | 171  |
| LbrM25_V2.2310 | <i>L. braziliensis</i> | 47  | 125  | 171  |
| LbrM25_V2.2320 | <i>L. braziliensis</i> | 69  | 78   | 146  |
| LbrM25_V2.2320 | <i>L. braziliensis</i> | 283 | 482  | 764  |
| LbrM25_V2.2320 | <i>L. braziliensis</i> | 44  | 776  | 819  |
| LbrM25_V2.2320 | <i>L. braziliensis</i> | 50  | 825  | 874  |
| LbrM25_V2.2320 | <i>L. braziliensis</i> | 75  | 885  | 959  |
| LbrM25_V2.2320 | <i>L. braziliensis</i> | 42  | 1012 | 1053 |
| LbrM25_V2.2340 | <i>L. braziliensis</i> | 109 | 476  | 584  |
| LbrM25_V2.2370 | <i>L. braziliensis</i> | 58  | 193  | 250  |
| LbrM25_V2.2370 | <i>L. braziliensis</i> | 69  | 365  | 433  |
| LbrM25_V2.2380 | <i>L. braziliensis</i> | 45  | 1    | 45   |
| LbrM25_V2.2380 | <i>L. braziliensis</i> | 55  | 68   | 122  |
| LbrM25_V2.2380 | <i>L. braziliensis</i> | 77  | 172  | 248  |
| LbrM25_V2.2400 | <i>L. braziliensis</i> | 41  | 109  | 149  |
| LbrM25_V2.2410 | <i>L. braziliensis</i> | 42  | 119  | 160  |
| LbrM25_V2.2410 | <i>L. braziliensis</i> | 47  | 564  | 610  |
| LbrM25_V2.2410 | <i>L. braziliensis</i> | 52  | 731  | 782  |
| LbrM25_V2.2410 | <i>L. braziliensis</i> | 43  | 1123 | 1165 |
| LbrM25_V2.2420 | <i>L. braziliensis</i> | 50  | 23   | 72   |
| LbrM25_V2.2420 | <i>L. braziliensis</i> | 521 | 131  | 651  |
| LbrM25_V2.2420 | <i>L. braziliensis</i> | 67  | 823  | 889  |
| LbrM25_V2.2420 | <i>L. braziliensis</i> | 78  | 1095 | 1172 |
| LbrM25_V2.2430 | <i>L. braziliensis</i> | 64  | 355  | 418  |
| LbrM25_V2.2430 | <i>L. braziliensis</i> | 66  | 451  | 516  |
| LbrM25_V2.2430 | <i>L. braziliensis</i> | 66  | 451  | 516  |
| LbrM25_V2.2440 | <i>L. braziliensis</i> | 44  | 112  | 155  |
| LbrM25_V2.2440 | <i>L. braziliensis</i> | 121 | 747  | 867  |
| LbrM25_V2.2440 | <i>L. braziliensis</i> | 61  | 1121 | 1181 |
| LbrM25_V2.2440 | <i>L. braziliensis</i> | 50  | 1227 | 1276 |
| LbrM25_V2.2450 | <i>L. braziliensis</i> | 874 | 1    | 874  |
| LbrM25_V2.2460 | <i>L. braziliensis</i> | 47  | 1    | 47   |
| LbrM25_V2.2470 | <i>L. braziliensis</i> | 162 | 46   | 207  |
| LbrM25_V2.2470 | <i>L. braziliensis</i> | 91  | 244  | 334  |
| LbrM25_V2.2470 | <i>L. braziliensis</i> | 113 | 432  | 544  |
| LbrM25_V2.2470 | <i>L. braziliensis</i> | 54  | 582  | 635  |
| LbrM25_V2.2470 | <i>L. braziliensis</i> | 53  | 927  | 979  |

|                |                        |     |      |      |
|----------------|------------------------|-----|------|------|
| LbrM25_V2.2490 | <i>L. braziliensis</i> | 231 | 30   | 260  |
| LbrM25_V2.2490 | <i>L. braziliensis</i> | 92  | 723  | 814  |
| LbrM25_V2.2520 | <i>L. braziliensis</i> | 94  | 39   | 132  |
| LbrM25_V2.2520 | <i>L. braziliensis</i> | 61  | 391  | 451  |
| LbrM25_V2.2520 | <i>L. braziliensis</i> | 59  | 497  | 555  |
| LbrM25_V2.2520 | <i>L. braziliensis</i> | 43  | 606  | 648  |
| LbrM25_V2.2520 | <i>L. braziliensis</i> | 44  | 688  | 731  |
| LbrM25_V2.2520 | <i>L. braziliensis</i> | 52  | 889  | 940  |
| LbrM25_V2.2520 | <i>L. braziliensis</i> | 124 | 995  | 1118 |
| LbrM25_V2.2520 | <i>L. braziliensis</i> | 56  | 1148 | 1203 |
| LbrM25_V2.2520 | <i>L. braziliensis</i> | 138 | 1233 | 1370 |
| LbrM25_V2.2520 | <i>L. braziliensis</i> | 119 | 1410 | 1528 |
| LbrM25_V2.2530 | <i>L. braziliensis</i> | 220 | 1    | 220  |
| LbrM25_V2.2530 | <i>L. braziliensis</i> | 70  | 382  | 451  |
| LbrM25_V2.2530 | <i>L. braziliensis</i> | 91  | 527  | 617  |
| LbrM25_V2.2530 | <i>L. braziliensis</i> | 46  | 773  | 818  |
| LbrM25_V2.2550 | <i>L. braziliensis</i> | 83  | 1    | 83   |
| LbrM25_V2.2560 | <i>L. braziliensis</i> | 40  | 512  | 551  |
| LbrM25_V2.2570 | <i>L. braziliensis</i> | 69  | 1    | 69   |
| LbrM25_V2.2570 | <i>L. braziliensis</i> | 95  | 85   | 179  |
| LbrM25_V2.2570 | <i>L. braziliensis</i> | 83  | 209  | 291  |
| LbrM25_V2.2570 | <i>L. braziliensis</i> | 48  | 334  | 381  |
| LbrM25_V2.2570 | <i>L. braziliensis</i> | 50  | 675  | 724  |
| LbrM25_V2.2570 | <i>L. braziliensis</i> | 208 | 733  | 940  |
| LbrM25_V2.2580 | <i>L. braziliensis</i> | 57  | 93   | 149  |
| LbrM25_V2.2580 | <i>L. braziliensis</i> | 187 | 245  | 431  |
| LbrM25_V2.2580 | <i>L. braziliensis</i> | 68  | 436  | 503  |
| LbrM25_V2.2590 | <i>L. braziliensis</i> | 82  | 59   | 140  |
| LbrM25_V2.2590 | <i>L. braziliensis</i> | 44  | 278  | 321  |
| LbrM25_V2.2590 | <i>L. braziliensis</i> | 49  | 445  | 493  |
| LbrM25_V2.2590 | <i>L. braziliensis</i> | 53  | 548  | 600  |
| LbrM25_V2.2600 | <i>L. braziliensis</i> | 131 | 1    | 131  |
| LbrM25_V2.2600 | <i>L. braziliensis</i> | 47  | 218  | 264  |
| LbrM25_V2.2600 | <i>L. braziliensis</i> | 105 | 275  | 379  |
| LbrM25_V2.2600 | <i>L. braziliensis</i> | 158 | 597  | 754  |
| LbrM25_V2.2600 | <i>L. braziliensis</i> | 125 | 919  | 1043 |
| LbrM25_V2.2600 | <i>L. braziliensis</i> | 71  | 1073 | 1143 |
| LbrM25_V2.2600 | <i>L. braziliensis</i> | 172 | 1156 | 1327 |
| LbrM25_V2.2610 | <i>L. braziliensis</i> | 121 | 22   | 142  |
| LbrM25_V2.2610 | <i>L. braziliensis</i> | 56  | 935  | 990  |
| LbrM25_V2.2620 | <i>L. braziliensis</i> | 58  | 816  | 873  |
| LbrM26_V2.0030 | <i>L. braziliensis</i> | 58  | 305  | 362  |
| LbrM26_V2.0070 | <i>L. braziliensis</i> | 157 | 1    | 157  |
| LbrM26_V2.0070 | <i>L. braziliensis</i> | 98  | 169  | 266  |
| LbrM26_V2.0080 | <i>L. braziliensis</i> | 67  | 236  | 302  |
| LbrM26_V2.0140 | <i>L. braziliensis</i> | 66  | 130  | 195  |
| LbrM26_V2.0150 | <i>L. braziliensis</i> | 92  | 1    | 92   |

|                 |                        |     |      |      |
|-----------------|------------------------|-----|------|------|
| LbrM26_V2.0160  | <i>L. braziliensis</i> | 60  | 1    | 60   |
| LbrM26_V2.0170  | <i>L. braziliensis</i> | 76  | 1    | 76   |
| LbrM26_V2.0190  | <i>L. braziliensis</i> | 55  | 1    | 55   |
| LbrM26_V2.0210a | <i>L. braziliensis</i> | 69  | 158  | 226  |
| LbrM26_V2.0260  | <i>L. braziliensis</i> | 54  | 80   | 133  |
| LbrM26_V2.0260  | <i>L. braziliensis</i> | 70  | 309  | 378  |
| LbrM26_V2.0260  | <i>L. braziliensis</i> | 70  | 309  | 378  |
| LbrM26_V2.0280  | <i>L. braziliensis</i> | 48  | 597  | 644  |
| LbrM26_V2.0320  | <i>L. braziliensis</i> | 64  | 94   | 157  |
| LbrM26_V2.0340  | <i>L. braziliensis</i> | 75  | 1    | 75   |
| LbrM26_V2.0370  | <i>L. braziliensis</i> | 89  | 588  | 676  |
| LbrM26_V2.0380  | <i>L. braziliensis</i> | 74  | 1    | 74   |
| LbrM26_V2.0380  | <i>L. braziliensis</i> | 48  | 775  | 822  |
| LbrM26_V2.0380  | <i>L. braziliensis</i> | 109 | 912  | 1020 |
| LbrM26_V2.0380  | <i>L. braziliensis</i> | 47  | 1188 | 1234 |
| LbrM26_V2.0380  | <i>L. braziliensis</i> | 67  | 1487 | 1553 |
| LbrM26_V2.0390  | <i>L. braziliensis</i> | 62  | 464  | 525  |
| LbrM26_V2.0400  | <i>L. braziliensis</i> | 43  | 212  | 254  |
| LbrM26_V2.0410  | <i>L. braziliensis</i> | 43  | 16   | 58   |
| LbrM26_V2.0420  | <i>L. braziliensis</i> | 63  | 1    | 63   |
| LbrM26_V2.0440  | <i>L. braziliensis</i> | 43  | 205  | 247  |
| LbrM26_V2.0440  | <i>L. braziliensis</i> | 80  | 557  | 636  |
| LbrM26_V2.0460  | <i>L. braziliensis</i> | 187 | 19   | 205  |
| LbrM26_V2.0490  | <i>L. braziliensis</i> | 74  | 823  | 896  |
| LbrM26_V2.0500  | <i>L. braziliensis</i> | 40  | 237  | 276  |
| LbrM26_V2.0510  | <i>L. braziliensis</i> | 138 | 1    | 138  |
| LbrM26_V2.0530  | <i>L. braziliensis</i> | 50  | 677  | 726  |
| LbrM26_V2.0540  | <i>L. braziliensis</i> | 131 | 1    | 131  |
| LbrM26_V2.0540  | <i>L. braziliensis</i> | 42  | 319  | 360  |
| LbrM26_V2.0540  | <i>L. braziliensis</i> | 56  | 383  | 438  |
| LbrM26_V2.0550  | <i>L. braziliensis</i> | 70  | 414  | 483  |
| LbrM26_V2.0550  | <i>L. braziliensis</i> | 61  | 853  | 913  |
| LbrM26_V2.0550  | <i>L. braziliensis</i> | 61  | 853  | 913  |
| LbrM26_V2.0560  | <i>L. braziliensis</i> | 84  | 138  | 221  |
| LbrM26_V2.0570  | <i>L. braziliensis</i> | 124 | 1    | 124  |
| LbrM26_V2.0570  | <i>L. braziliensis</i> | 49  | 178  | 226  |
| LbrM26_V2.0570  | <i>L. braziliensis</i> | 230 | 313  | 542  |
| LbrM26_V2.0590  | <i>L. braziliensis</i> | 90  | 70   | 159  |
| LbrM26_V2.0590  | <i>L. braziliensis</i> | 103 | 248  | 350  |
| LbrM26_V2.0590  | <i>L. braziliensis</i> | 54  | 364  | 417  |
| LbrM26_V2.0590  | <i>L. braziliensis</i> | 64  | 533  | 596  |
| LbrM26_V2.0600  | <i>L. braziliensis</i> | 77  | 1    | 77   |
| LbrM26_V2.0600  | <i>L. braziliensis</i> | 69  | 122  | 190  |
| LbrM26_V2.0600  | <i>L. braziliensis</i> | 110 | 392  | 501  |
| LbrM26_V2.0600  | <i>L. braziliensis</i> | 86  | 590  | 675  |
| LbrM26_V2.0610  | <i>L. braziliensis</i> | 126 | 66   | 191  |
| LbrM26_V2.0610  | <i>L. braziliensis</i> | 114 | 220  | 333  |



|                |                        |     |      |      |
|----------------|------------------------|-----|------|------|
| LbrM26_V2.0620 | <i>L. braziliensis</i> | 85  | 32   | 116  |
| LbrM26_V2.0660 | <i>L. braziliensis</i> | 71  | 479  | 549  |
| LbrM26_V2.0660 | <i>L. braziliensis</i> | 45  | 692  | 736  |
| LbrM26_V2.0660 | <i>L. braziliensis</i> | 66  | 1132 | 1197 |
| LbrM26_V2.0700 | <i>L. braziliensis</i> | 135 | 69   | 203  |
| LbrM26_V2.0710 | <i>L. braziliensis</i> | 108 | 39   | 146  |
| LbrM26_V2.0710 | <i>L. braziliensis</i> | 102 | 230  | 331  |
| LbrM26_V2.0710 | <i>L. braziliensis</i> | 50  | 449  | 498  |
| LbrM26_V2.0720 | <i>L. braziliensis</i> | 55  | 462  | 516  |
| LbrM26_V2.0720 | <i>L. braziliensis</i> | 74  | 603  | 676  |
| LbrM26_V2.0720 | <i>L. braziliensis</i> | 74  | 603  | 676  |
| LbrM26_V2.0730 | <i>L. braziliensis</i> | 62  | 1    | 62   |
| LbrM26_V2.0730 | <i>L. braziliensis</i> | 95  | 118  | 212  |
| LbrM26_V2.0730 | <i>L. braziliensis</i> | 165 | 254  | 418  |
| LbrM26_V2.0730 | <i>L. braziliensis</i> | 130 | 542  | 671  |
| LbrM26_V2.0730 | <i>L. braziliensis</i> | 74  | 920  | 993  |
| LbrM26_V2.0730 | <i>L. braziliensis</i> | 44  | 1082 | 1125 |
| LbrM26_V2.0740 | <i>L. braziliensis</i> | 99  | 58   | 156  |
| LbrM26_V2.0740 | <i>L. braziliensis</i> | 177 | 188  | 364  |
| LbrM26_V2.0740 | <i>L. braziliensis</i> | 94  | 400  | 493  |
| LbrM26_V2.0740 | <i>L. braziliensis</i> | 58  | 584  | 641  |
| LbrM26_V2.0740 | <i>L. braziliensis</i> | 197 | 895  | 1091 |
| LbrM26_V2.0740 | <i>L. braziliensis</i> | 138 | 1198 | 1335 |
| LbrM26_V2.0740 | <i>L. braziliensis</i> | 49  | 1353 | 1401 |
| LbrM26_V2.0760 | <i>L. braziliensis</i> | 146 | 154  | 299  |
| LbrM26_V2.0760 | <i>L. braziliensis</i> | 144 | 432  | 575  |
| LbrM26_V2.0760 | <i>L. braziliensis</i> | 228 | 1298 | 1525 |
| LbrM26_V2.0760 | <i>L. braziliensis</i> | 143 | 1528 | 1670 |
| LbrM26_V2.0780 | <i>L. braziliensis</i> | 457 | 87   | 543  |
| LbrM26_V2.0810 | <i>L. braziliensis</i> | 132 | 208  | 339  |
| LbrM26_V2.0850 | <i>L. braziliensis</i> | 282 | 115  | 396  |
| LbrM26_V2.0850 | <i>L. braziliensis</i> | 116 | 593  | 708  |
| LbrM26_V2.0850 | <i>L. braziliensis</i> | 52  | 834  | 885  |
| LbrM26_V2.0860 | <i>L. braziliensis</i> | 74  | 248  | 321  |
| LbrM26_V2.0870 | <i>L. braziliensis</i> | 56  | 461  | 516  |
| LbrM26_V2.0870 | <i>L. braziliensis</i> | 44  | 556  | 599  |
| LbrM26_V2.0870 | <i>L. braziliensis</i> | 65  | 639  | 703  |
| LbrM26_V2.0880 | <i>L. braziliensis</i> | 352 | 161  | 512  |
| LbrM26_V2.0880 | <i>L. braziliensis</i> | 103 | 577  | 679  |
| LbrM26_V2.0880 | <i>L. braziliensis</i> | 75  | 700  | 774  |
| LbrM26_V2.0910 | <i>L. braziliensis</i> | 87  | 1    | 87   |
| LbrM26_V2.0910 | <i>L. braziliensis</i> | 50  | 272  | 321  |
| LbrM26_V2.0910 | <i>L. braziliensis</i> | 127 | 707  | 833  |
| LbrM26_V2.0910 | <i>L. braziliensis</i> | 44  | 895  | 938  |
| LbrM26_V2.0920 | <i>L. braziliensis</i> | 45  | 140  | 184  |
| LbrM26_V2.0930 | <i>L. braziliensis</i> | 42  | 130  | 171  |
| LbrM26_V2.0940 | <i>L. braziliensis</i> | 63  | 240  | 302  |

|                |                        |     |      |      |
|----------------|------------------------|-----|------|------|
| LbrM26_V2.0940 | <i>L. braziliensis</i> | 74  | 304  | 377  |
| LbrM26_V2.0940 | <i>L. braziliensis</i> | 74  | 304  | 377  |
| LbrM26_V2.0950 | <i>L. braziliensis</i> | 137 | 148  | 284  |
| LbrM26_V2.0950 | <i>L. braziliensis</i> | 49  | 314  | 362  |
| LbrM26_V2.0960 | <i>L. braziliensis</i> | 58  | 1    | 58   |
| LbrM26_V2.0960 | <i>L. braziliensis</i> | 241 | 70   | 310  |
| LbrM26_V2.0970 | <i>L. braziliensis</i> | 48  | 1    | 48   |
| LbrM26_V2.0970 | <i>L. braziliensis</i> | 45  | 193  | 237  |
| LbrM26_V2.0970 | <i>L. braziliensis</i> | 43  | 308  | 350  |
| LbrM26_V2.0970 | <i>L. braziliensis</i> | 52  | 891  | 942  |
| LbrM26_V2.0970 | <i>L. braziliensis</i> | 70  | 1176 | 1245 |
| LbrM26_V2.0970 | <i>L. braziliensis</i> | 40  | 1285 | 1324 |
| LbrM26_V2.0980 | <i>L. braziliensis</i> | 126 | 438  | 563  |
| LbrM26_V2.0990 | <i>L. braziliensis</i> | 217 | 1    | 217  |
| LbrM26_V2.0990 | <i>L. braziliensis</i> | 652 | 229  | 880  |
| LbrM26_V2.1010 | <i>L. braziliensis</i> | 96  | 133  | 228  |
| LbrM26_V2.1020 | <i>L. braziliensis</i> | 62  | 276  | 337  |
| LbrM26_V2.1020 | <i>L. braziliensis</i> | 41  | 370  | 410  |
| LbrM26_V2.1020 | <i>L. braziliensis</i> | 41  | 370  | 410  |
| LbrM26_V2.1040 | <i>L. braziliensis</i> | 50  | 1    | 50   |
| LbrM26_V2.1040 | <i>L. braziliensis</i> | 55  | 583  | 637  |
| LbrM26_V2.1040 | <i>L. braziliensis</i> | 66  | 2635 | 2700 |
| LbrM26_V2.1040 | <i>L. braziliensis</i> | 40  | 2834 | 2873 |
| LbrM26_V2.1040 | <i>L. braziliensis</i> | 63  | 3145 | 3207 |
| LbrM26_V2.1050 | <i>L. braziliensis</i> | 53  | 1    | 53   |
| LbrM26_V2.1050 | <i>L. braziliensis</i> | 62  | 77   | 138  |
| LbrM26_V2.1050 | <i>L. braziliensis</i> | 82  | 696  | 777  |
| LbrM26_V2.1080 | <i>L. braziliensis</i> | 230 | 136  | 365  |
| LbrM26_V2.1090 | <i>L. braziliensis</i> | 97  | 24   | 120  |
| LbrM26_V2.1090 | <i>L. braziliensis</i> | 83  | 153  | 235  |
| LbrM26_V2.1090 | <i>L. braziliensis</i> | 45  | 463  | 507  |
| LbrM26_V2.1100 | <i>L. braziliensis</i> | 75  | 1    | 75   |
| LbrM26_V2.1100 | <i>L. braziliensis</i> | 96  | 98   | 193  |
| LbrM26_V2.1100 | <i>L. braziliensis</i> | 296 | 249  | 544  |
| LbrM26_V2.1100 | <i>L. braziliensis</i> | 74  | 559  | 632  |
| LbrM26_V2.1100 | <i>L. braziliensis</i> | 188 | 642  | 829  |
| LbrM26_V2.1100 | <i>L. braziliensis</i> | 40  | 859  | 898  |
| LbrM26_V2.1100 | <i>L. braziliensis</i> | 75  | 925  | 999  |
| LbrM26_V2.1100 | <i>L. braziliensis</i> | 108 | 1075 | 1182 |
| LbrM26_V2.1100 | <i>L. braziliensis</i> | 93  | 1229 | 1321 |
| LbrM26_V2.1100 | <i>L. braziliensis</i> | 58  | 1416 | 1473 |
| LbrM26_V2.1100 | <i>L. braziliensis</i> | 63  | 1528 | 1590 |
| LbrM26_V2.1110 | <i>L. braziliensis</i> | 173 | 22   | 194  |
| LbrM26_V2.1140 | <i>L. braziliensis</i> | 108 | 73   | 180  |
| LbrM26_V2.1140 | <i>L. braziliensis</i> | 89  | 203  | 291  |
| LbrM26_V2.1140 | <i>L. braziliensis</i> | 71  | 404  | 474  |
| LbrM26_V2.1150 | <i>L. braziliensis</i> | 75  | 26   | 100  |

|                |                        |     |      |      |
|----------------|------------------------|-----|------|------|
| LbrM26_V2.1150 | <i>L. braziliensis</i> | 317 | 111  | 427  |
| LbrM26_V2.1150 | <i>L. braziliensis</i> | 81  | 545  | 625  |
| LbrM26_V2.1150 | <i>L. braziliensis</i> | 82  | 642  | 723  |
| LbrM26_V2.1150 | <i>L. braziliensis</i> | 155 | 734  | 888  |
| LbrM26_V2.1150 | <i>L. braziliensis</i> | 157 | 894  | 1050 |
| LbrM26_V2.1150 | <i>L. braziliensis</i> | 46  | 1074 | 1119 |
| LbrM26_V2.1150 | <i>L. braziliensis</i> | 53  | 1154 | 1206 |
| LbrM26_V2.1150 | <i>L. braziliensis</i> | 42  | 1218 | 1259 |
| LbrM26_V2.1150 | <i>L. braziliensis</i> | 114 | 1314 | 1427 |
| LbrM26_V2.1150 | <i>L. braziliensis</i> | 171 | 1575 | 1745 |
| LbrM26_V2.1160 | <i>L. braziliensis</i> | 113 | 1    | 113  |
| LbrM26_V2.1160 | <i>L. braziliensis</i> | 42  | 118  | 159  |
| LbrM26_V2.1170 | <i>L. braziliensis</i> | 133 | 1    | 133  |
| LbrM26_V2.1170 | <i>L. braziliensis</i> | 93  | 291  | 383  |
| LbrM26_V2.1170 | <i>L. braziliensis</i> | 42  | 560  | 601  |
| LbrM26_V2.1170 | <i>L. braziliensis</i> | 88  | 620  | 707  |
| LbrM26_V2.1180 | <i>L. braziliensis</i> | 70  | 122  | 191  |
| LbrM26_V2.1180 | <i>L. braziliensis</i> | 64  | 303  | 366  |
| LbrM26_V2.1180 | <i>L. braziliensis</i> | 41  | 424  | 464  |
| LbrM26_V2.1180 | <i>L. braziliensis</i> | 52  | 484  | 535  |
| LbrM26_V2.1180 | <i>L. braziliensis</i> | 53  | 580  | 632  |
| LbrM26_V2.1180 | <i>L. braziliensis</i> | 62  | 669  | 730  |
| LbrM26_V2.1180 | <i>L. braziliensis</i> | 84  | 749  | 832  |
| LbrM26_V2.1190 | <i>L. braziliensis</i> | 70  | 1    | 70   |
| LbrM26_V2.1190 | <i>L. braziliensis</i> | 45  | 96   | 140  |
| LbrM26_V2.1190 | <i>L. braziliensis</i> | 68  | 212  | 279  |
| LbrM26_V2.1190 | <i>L. braziliensis</i> | 40  | 288  | 327  |
| LbrM26_V2.1190 | <i>L. braziliensis</i> | 127 | 343  | 469  |
| LbrM26_V2.1200 | <i>L. braziliensis</i> | 53  | 1    | 53   |
| LbrM26_V2.1200 | <i>L. braziliensis</i> | 50  | 89   | 138  |
| LbrM26_V2.1200 | <i>L. braziliensis</i> | 46  | 162  | 207  |
| LbrM26_V2.1200 | <i>L. braziliensis</i> | 54  | 245  | 298  |
| LbrM26_V2.1200 | <i>L. braziliensis</i> | 55  | 401  | 455  |
| LbrM26_V2.1210 | <i>L. braziliensis</i> | 184 | 17   | 200  |
| LbrM26_V2.1210 | <i>L. braziliensis</i> | 82  | 209  | 290  |
| LbrM26_V2.1210 | <i>L. braziliensis</i> | 80  | 313  | 392  |
| LbrM26_V2.1210 | <i>L. braziliensis</i> | 71  | 402  | 472  |
| LbrM26_V2.1210 | <i>L. braziliensis</i> | 76  | 480  | 555  |
| LbrM26_V2.1210 | <i>L. braziliensis</i> | 78  | 577  | 654  |
| LbrM26_V2.1210 | <i>L. braziliensis</i> | 418 | 862  | 1279 |
| LbrM26_V2.1210 | <i>L. braziliensis</i> | 113 | 1460 | 1572 |
| LbrM26_V2.1210 | <i>L. braziliensis</i> | 76  | 1577 | 1652 |
| LbrM26_V2.1220 | <i>L. braziliensis</i> | 62  | 51   | 112  |
| LbrM26_V2.1220 | <i>L. braziliensis</i> | 42  | 253  | 294  |
| LbrM26_V2.1220 | <i>L. braziliensis</i> | 52  | 326  | 377  |
| LbrM26_V2.1230 | <i>L. braziliensis</i> | 68  | 175  | 242  |
| LbrM26_V2.1240 | <i>L. braziliensis</i> | 59  | 120  | 178  |

|                |                        |     |      |      |
|----------------|------------------------|-----|------|------|
| LbrM26_V2.1240 | <i>L. braziliensis</i> | 130 | 240  | 369  |
| LbrM26_V2.1240 | <i>L. braziliensis</i> | 49  | 464  | 512  |
| LbrM26_V2.1240 | <i>L. braziliensis</i> | 149 | 518  | 666  |
| LbrM26_V2.1250 | <i>L. braziliensis</i> | 79  | 1    | 79   |
| LbrM26_V2.1250 | <i>L. braziliensis</i> | 143 | 417  | 559  |
| LbrM26_V2.1250 | <i>L. braziliensis</i> | 123 | 570  | 692  |
| LbrM26_V2.1250 | <i>L. braziliensis</i> | 49  | 804  | 852  |
| LbrM26_V2.1250 | <i>L. braziliensis</i> | 57  | 893  | 949  |
| LbrM26_V2.1250 | <i>L. braziliensis</i> | 41  | 951  | 991  |
| LbrM26_V2.1250 | <i>L. braziliensis</i> | 104 | 1022 | 1125 |
| LbrM26_V2.1250 | <i>L. braziliensis</i> | 59  | 1400 | 1458 |
| LbrM26_V2.1250 | <i>L. braziliensis</i> | 126 | 1664 | 1789 |
| LbrM26_V2.1250 | <i>L. braziliensis</i> | 266 | 1795 | 2060 |
| LbrM26_V2.1250 | <i>L. braziliensis</i> | 151 | 2080 | 2230 |
| LbrM26_V2.1250 | <i>L. braziliensis</i> | 187 | 2237 | 2423 |
| LbrM26_V2.1250 | <i>L. braziliensis</i> | 72  | 2613 | 2684 |
| LbrM26_V2.1250 | <i>L. braziliensis</i> | 132 | 2843 | 2974 |
| LbrM26_V2.1260 | <i>L. braziliensis</i> | 57  | 494  | 550  |
| LbrM26_V2.1270 | <i>L. braziliensis</i> | 71  | 462  | 532  |
| LbrM26_V2.1270 | <i>L. braziliensis</i> | 165 | 535  | 699  |
| LbrM26_V2.1280 | <i>L. braziliensis</i> | 261 | 78   | 338  |
| LbrM26_V2.1280 | <i>L. braziliensis</i> | 312 | 454  | 765  |
| LbrM26_V2.1280 | <i>L. braziliensis</i> | 44  | 884  | 927  |
| LbrM26_V2.1280 | <i>L. braziliensis</i> | 57  | 1074 | 1130 |
| LbrM26_V2.1280 | <i>L. braziliensis</i> | 98  | 1159 | 1256 |
| LbrM26_V2.1280 | <i>L. braziliensis</i> | 204 | 1308 | 1511 |
| LbrM26_V2.1290 | <i>L. braziliensis</i> | 67  | 1    | 67   |
| LbrM26_V2.1290 | <i>L. braziliensis</i> | 72  | 327  | 398  |
| LbrM26_V2.1290 | <i>L. braziliensis</i> | 44  | 428  | 471  |
| LbrM26_V2.1290 | <i>L. braziliensis</i> | 131 | 562  | 692  |
| LbrM26_V2.1300 | <i>L. braziliensis</i> | 108 | 113  | 220  |
| LbrM26_V2.1300 | <i>L. braziliensis</i> | 314 | 262  | 575  |
| LbrM26_V2.1300 | <i>L. braziliensis</i> | 60  | 680  | 739  |
| LbrM26_V2.1300 | <i>L. braziliensis</i> | 83  | 973  | 1055 |
| LbrM26_V2.1300 | <i>L. braziliensis</i> | 142 | 1151 | 1292 |
| LbrM26_V2.1310 | <i>L. braziliensis</i> | 53  | 49   | 101  |
| LbrM26_V2.1310 | <i>L. braziliensis</i> | 60  | 151  | 210  |
| LbrM26_V2.1310 | <i>L. braziliensis</i> | 54  | 453  | 506  |
| LbrM26_V2.1320 | <i>L. braziliensis</i> | 60  | 440  | 499  |
| LbrM26_V2.1320 | <i>L. braziliensis</i> | 50  | 598  | 647  |
| LbrM26_V2.1320 | <i>L. braziliensis</i> | 51  | 728  | 778  |
| LbrM26_V2.1320 | <i>L. braziliensis</i> | 320 | 870  | 1189 |
| LbrM26_V2.1330 | <i>L. braziliensis</i> | 60  | 106  | 165  |
| LbrM26_V2.1340 | <i>L. braziliensis</i> | 46  | 14   | 59   |
| LbrM26_V2.1340 | <i>L. braziliensis</i> | 48  | 230  | 277  |
| LbrM26_V2.1340 | <i>L. braziliensis</i> | 48  | 230  | 277  |
| LbrM26_V2.1350 | <i>L. braziliensis</i> | 74  | 268  | 341  |

|                |                        |     |      |      |
|----------------|------------------------|-----|------|------|
| LbrM26_V2.1350 | <i>L. braziliensis</i> | 56  | 359  | 414  |
| LbrM26_V2.1350 | <i>L. braziliensis</i> | 56  | 359  | 414  |
| LbrM26_V2.1360 | <i>L. braziliensis</i> | 56  | 1    | 56   |
| LbrM26_V2.1360 | <i>L. braziliensis</i> | 83  | 110  | 192  |
| LbrM26_V2.1360 | <i>L. braziliensis</i> | 45  | 485  | 529  |
| LbrM26_V2.1390 | <i>L. braziliensis</i> | 127 | 1    | 127  |
| LbrM26_V2.1390 | <i>L. braziliensis</i> | 65  | 178  | 242  |
| LbrM26_V2.1390 | <i>L. braziliensis</i> | 97  | 261  | 357  |
| LbrM26_V2.1390 | <i>L. braziliensis</i> | 63  | 493  | 555  |
| LbrM26_V2.1390 | <i>L. braziliensis</i> | 82  | 625  | 706  |
| LbrM26_V2.1410 | <i>L. braziliensis</i> | 107 | 1    | 107  |
| LbrM26_V2.1410 | <i>L. braziliensis</i> | 115 | 160  | 274  |
| LbrM26_V2.1410 | <i>L. braziliensis</i> | 95  | 349  | 443  |
| LbrM26_V2.1410 | <i>L. braziliensis</i> | 55  | 544  | 598  |
| LbrM26_V2.1410 | <i>L. braziliensis</i> | 134 | 637  | 770  |
| LbrM26_V2.1420 | <i>L. braziliensis</i> | 64  | 1    | 64   |
| LbrM26_V2.1420 | <i>L. braziliensis</i> | 61  | 79   | 139  |
| LbrM26_V2.1420 | <i>L. braziliensis</i> | 95  | 164  | 258  |
| LbrM26_V2.1430 | <i>L. braziliensis</i> | 70  | 131  | 200  |
| LbrM26_V2.1430 | <i>L. braziliensis</i> | 74  | 327  | 400  |
| LbrM26_V2.1430 | <i>L. braziliensis</i> | 74  | 327  | 400  |
| LbrM26_V2.1440 | <i>L. braziliensis</i> | 56  | 408  | 463  |
| LbrM26_V2.1440 | <i>L. braziliensis</i> | 49  | 682  | 730  |
| LbrM26_V2.1440 | <i>L. braziliensis</i> | 50  | 813  | 862  |
| LbrM26_V2.1440 | <i>L. braziliensis</i> | 66  | 949  | 1014 |
| LbrM26_V2.1440 | <i>L. braziliensis</i> | 69  | 1111 | 1179 |
| LbrM26_V2.1440 | <i>L. braziliensis</i> | 199 | 1294 | 1492 |
| LbrM26_V2.1440 | <i>L. braziliensis</i> | 66  | 1868 | 1933 |
| LbrM26_V2.1440 | <i>L. braziliensis</i> | 250 | 1993 | 2242 |
| LbrM26_V2.1440 | <i>L. braziliensis</i> | 128 | 2263 | 2390 |
| LbrM26_V2.1450 | <i>L. braziliensis</i> | 222 | 1    | 222  |
| LbrM26_V2.1450 | <i>L. braziliensis</i> | 81  | 237  | 317  |
| LbrM26_V2.1450 | <i>L. braziliensis</i> | 44  | 360  | 403  |
| LbrM26_V2.1460 | <i>L. braziliensis</i> | 136 | 74   | 209  |
| LbrM26_V2.1460 | <i>L. braziliensis</i> | 47  | 236  | 282  |
| LbrM26_V2.1460 | <i>L. braziliensis</i> | 121 | 304  | 424  |
| LbrM26_V2.1460 | <i>L. braziliensis</i> | 73  | 629  | 701  |
| LbrM26_V2.1470 | <i>L. braziliensis</i> | 242 | 11   | 252  |
| LbrM26_V2.1470 | <i>L. braziliensis</i> | 78  | 388  | 465  |
| LbrM26_V2.1470 | <i>L. braziliensis</i> | 320 | 494  | 813  |
| LbrM26_V2.1470 | <i>L. braziliensis</i> | 44  | 1009 | 1052 |
| LbrM26_V2.1480 | <i>L. braziliensis</i> | 51  | 91   | 141  |
| LbrM26_V2.1480 | <i>L. braziliensis</i> | 57  | 451  | 507  |
| LbrM26_V2.1490 | <i>L. braziliensis</i> | 53  | 35   | 87   |
| LbrM26_V2.1490 | <i>L. braziliensis</i> | 53  | 177  | 229  |
| LbrM26_V2.1500 | <i>L. braziliensis</i> | 49  | 1    | 49   |
| LbrM26_V2.1500 | <i>L. braziliensis</i> | 70  | 86   | 155  |

|                |                        |     |      |      |
|----------------|------------------------|-----|------|------|
| LbrM26_V2.1500 | <i>L. braziliensis</i> | 44  | 232  | 275  |
| LbrM26_V2.1500 | <i>L. braziliensis</i> | 68  | 422  | 489  |
| LbrM26_V2.1500 | <i>L. braziliensis</i> | 78  | 786  | 863  |
| LbrM26_V2.1510 | <i>L. braziliensis</i> | 53  | 389  | 441  |
| LbrM26_V2.1520 | <i>L. braziliensis</i> | 136 | 1    | 136  |
| LbrM26_V2.1530 | <i>L. braziliensis</i> | 77  | 1    | 77   |
| LbrM26_V2.1530 | <i>L. braziliensis</i> | 40  | 129  | 168  |
| LbrM26_V2.1530 | <i>L. braziliensis</i> | 129 | 185  | 313  |
| LbrM26_V2.1530 | <i>L. braziliensis</i> | 327 | 369  | 695  |
| LbrM26_V2.1530 | <i>L. braziliensis</i> | 215 | 705  | 919  |
| LbrM26_V2.1530 | <i>L. braziliensis</i> | 50  | 1043 | 1092 |
| LbrM26_V2.1530 | <i>L. braziliensis</i> | 109 | 1158 | 1266 |
| LbrM26_V2.1530 | <i>L. braziliensis</i> | 48  | 1322 | 1369 |
| LbrM26_V2.1530 | <i>L. braziliensis</i> | 72  | 1408 | 1479 |
| LbrM26_V2.1550 | <i>L. braziliensis</i> | 103 | 1    | 103  |
| LbrM26_V2.1570 | <i>L. braziliensis</i> | 42  | 1    | 42   |
| LbrM26_V2.1580 | <i>L. braziliensis</i> | 167 | 1    | 167  |
| LbrM26_V2.1580 | <i>L. braziliensis</i> | 41  | 196  | 236  |
| LbrM26_V2.1580 | <i>L. braziliensis</i> | 55  | 1007 | 1061 |
| LbrM26_V2.1580 | <i>L. braziliensis</i> | 44  | 1621 | 1664 |
| LbrM26_V2.1600 | <i>L. braziliensis</i> | 54  | 1    | 54   |
| LbrM26_V2.1610 | <i>L. braziliensis</i> | 50  | 46   | 95   |
| LbrM26_V2.1610 | <i>L. braziliensis</i> | 51  | 175  | 225  |
| LbrM26_V2.1610 | <i>L. braziliensis</i> | 51  | 175  | 225  |
| LbrM26_V2.1620 | <i>L. braziliensis</i> | 163 | 438  | 600  |
| LbrM26_V2.1640 | <i>L. braziliensis</i> | 41  | 18   | 58   |
| LbrM26_V2.1710 | <i>L. braziliensis</i> | 49  | 152  | 200  |
| LbrM26_V2.1710 | <i>L. braziliensis</i> | 98  | 230  | 327  |
| LbrM26_V2.1720 | <i>L. braziliensis</i> | 40  | 1    | 40   |
| LbrM26_V2.1720 | <i>L. braziliensis</i> | 75  | 740  | 814  |
| LbrM26_V2.1720 | <i>L. braziliensis</i> | 51  | 1111 | 1161 |
| LbrM26_V2.1720 | <i>L. braziliensis</i> | 42  | 1221 | 1262 |
| LbrM26_V2.1720 | <i>L. braziliensis</i> | 45  | 1480 | 1524 |
| LbrM26_V2.1720 | <i>L. braziliensis</i> | 42  | 1687 | 1728 |
| LbrM26_V2.1720 | <i>L. braziliensis</i> | 60  | 1889 | 1948 |
| LbrM26_V2.1730 | <i>L. braziliensis</i> | 50  | 1    | 50   |
| LbrM26_V2.1740 | <i>L. braziliensis</i> | 43  | 97   | 139  |
| LbrM26_V2.1740 | <i>L. braziliensis</i> | 55  | 177  | 231  |
| LbrM26_V2.1740 | <i>L. braziliensis</i> | 242 | 252  | 493  |
| LbrM26_V2.1740 | <i>L. braziliensis</i> | 42  | 548  | 589  |
| LbrM26_V2.1750 | <i>L. braziliensis</i> | 525 | 1    | 525  |
| LbrM26_V2.1750 | <i>L. braziliensis</i> | 55  | 544  | 598  |
| LbrM26_V2.1750 | <i>L. braziliensis</i> | 440 | 627  | 1066 |
| LbrM26_V2.1750 | <i>L. braziliensis</i> | 291 | 1089 | 1379 |
| LbrM26_V2.1750 | <i>L. braziliensis</i> | 150 | 1416 | 1565 |
| LbrM26_V2.1750 | <i>L. braziliensis</i> | 80  | 1632 | 1711 |
| LbrM26_V2.1750 | <i>L. braziliensis</i> | 58  | 1782 | 1839 |

|                |                        |     |      |      |
|----------------|------------------------|-----|------|------|
| LbrM26_V2.1750 | <i>L. braziliensis</i> | 51  | 1984 | 2034 |
| LbrM26_V2.1750 | <i>L. braziliensis</i> | 52  | 2104 | 2155 |
| LbrM26_V2.1750 | <i>L. braziliensis</i> | 92  | 2187 | 2278 |
| LbrM26_V2.1750 | <i>L. braziliensis</i> | 45  | 2310 | 2354 |
| LbrM26_V2.1760 | <i>L. braziliensis</i> | 77  | 1    | 77   |
| LbrM26_V2.1760 | <i>L. braziliensis</i> | 322 | 117  | 438  |
| LbrM26_V2.1760 | <i>L. braziliensis</i> | 185 | 685  | 869  |
| LbrM26_V2.1770 | <i>L. braziliensis</i> | 74  | 34   | 107  |
| LbrM26_V2.1770 | <i>L. braziliensis</i> | 72  | 124  | 195  |
| LbrM26_V2.1770 | <i>L. braziliensis</i> | 48  | 223  | 270  |
| LbrM26_V2.1770 | <i>L. braziliensis</i> | 52  | 348  | 399  |
| LbrM26_V2.1770 | <i>L. braziliensis</i> | 69  | 437  | 505  |
| LbrM26_V2.1770 | <i>L. braziliensis</i> | 84  | 570  | 653  |
| LbrM26_V2.1790 | <i>L. braziliensis</i> | 43  | 1    | 43   |
| LbrM26_V2.1790 | <i>L. braziliensis</i> | 58  | 281  | 338  |
| LbrM26_V2.1790 | <i>L. braziliensis</i> | 58  | 281  | 338  |
| LbrM26_V2.1800 | <i>L. braziliensis</i> | 281 | 1    | 281  |
| LbrM26_V2.1800 | <i>L. braziliensis</i> | 98  | 283  | 380  |
| LbrM26_V2.1800 | <i>L. braziliensis</i> | 54  | 473  | 526  |
| LbrM26_V2.1800 | <i>L. braziliensis</i> | 60  | 599  | 658  |
| LbrM26_V2.1800 | <i>L. braziliensis</i> | 56  | 699  | 754  |
| LbrM26_V2.1800 | <i>L. braziliensis</i> | 164 | 975  | 1138 |
| LbrM26_V2.1800 | <i>L. braziliensis</i> | 121 | 1150 | 1270 |
| LbrM26_V2.1800 | <i>L. braziliensis</i> | 133 | 1284 | 1416 |
| LbrM26_V2.1800 | <i>L. braziliensis</i> | 81  | 1454 | 1534 |
| LbrM26_V2.1800 | <i>L. braziliensis</i> | 62  | 1702 | 1763 |
| LbrM26_V2.1800 | <i>L. braziliensis</i> | 237 | 1779 | 2015 |
| LbrM26_V2.1800 | <i>L. braziliensis</i> | 40  | 2058 | 2097 |
| LbrM26_V2.1800 | <i>L. braziliensis</i> | 338 | 2274 | 2611 |
| LbrM26_V2.1800 | <i>L. braziliensis</i> | 118 | 2700 | 2817 |
| LbrM26_V2.1810 | <i>L. braziliensis</i> | 76  | 63   | 138  |
| LbrM26_V2.1810 | <i>L. braziliensis</i> | 55  | 178  | 232  |
| LbrM26_V2.1810 | <i>L. braziliensis</i> | 112 | 522  | 633  |
| LbrM26_V2.1820 | <i>L. braziliensis</i> | 72  | 67   | 138  |
| LbrM26_V2.1820 | <i>L. braziliensis</i> | 87  | 206  | 292  |
| LbrM26_V2.1820 | <i>L. braziliensis</i> | 87  | 206  | 292  |
| LbrM26_V2.1830 | <i>L. braziliensis</i> | 61  | 151  | 211  |
| LbrM26_V2.1830 | <i>L. braziliensis</i> | 50  | 500  | 549  |
| LbrM26_V2.1830 | <i>L. braziliensis</i> | 67  | 1055 | 1121 |
| LbrM26_V2.1840 | <i>L. braziliensis</i> | 74  | 115  | 188  |
| LbrM26_V2.1870 | <i>L. braziliensis</i> | 72  | 60   | 131  |
| LbrM26_V2.1870 | <i>L. braziliensis</i> | 49  | 241  | 289  |
| LbrM26_V2.1870 | <i>L. braziliensis</i> | 75  | 373  | 447  |
| LbrM26_V2.1870 | <i>L. braziliensis</i> | 46  | 1692 | 1737 |
| LbrM26_V2.1870 | <i>L. braziliensis</i> | 41  | 2223 | 2263 |
| LbrM26_V2.1870 | <i>L. braziliensis</i> | 73  | 2452 | 2524 |
| LbrM26_V2.1880 | <i>L. braziliensis</i> | 111 | 1    | 111  |

|                |                        |     |      |      |
|----------------|------------------------|-----|------|------|
| LbrM26_V2.1880 | <i>L. braziliensis</i> | 70  | 171  | 240  |
| LbrM26_V2.1880 | <i>L. braziliensis</i> | 49  | 314  | 362  |
| LbrM26_V2.1880 | <i>L. braziliensis</i> | 64  | 503  | 566  |
| LbrM26_V2.1880 | <i>L. braziliensis</i> | 107 | 772  | 878  |
| LbrM26_V2.1890 | <i>L. braziliensis</i> | 67  | 220  | 286  |
| LbrM26_V2.1900 | <i>L. braziliensis</i> | 173 | 1    | 173  |
| LbrM26_V2.1910 | <i>L. braziliensis</i> | 89  | 129  | 217  |
| LbrM26_V2.1920 | <i>L. braziliensis</i> | 45  | 60   | 104  |
| LbrM26_V2.1930 | <i>L. braziliensis</i> | 100 | 173  | 272  |
| LbrM26_V2.1930 | <i>L. braziliensis</i> | 382 | 342  | 723  |
| LbrM26_V2.1950 | <i>L. braziliensis</i> | 48  | 76   | 123  |
| LbrM26_V2.1960 | <i>L. braziliensis</i> | 85  | 94   | 178  |
| LbrM26_V2.1970 | <i>L. braziliensis</i> | 105 | 58   | 162  |
| LbrM26_V2.1970 | <i>L. braziliensis</i> | 131 | 252  | 382  |
| LbrM26_V2.1970 | <i>L. braziliensis</i> | 109 | 424  | 532  |
| LbrM26_V2.1970 | <i>L. braziliensis</i> | 113 | 785  | 897  |
| LbrM26_V2.1980 | <i>L. braziliensis</i> | 81  | 1    | 81   |
| LbrM26_V2.1980 | <i>L. braziliensis</i> | 63  | 197  | 259  |
| LbrM26_V2.1980 | <i>L. braziliensis</i> | 40  | 355  | 394  |
| LbrM26_V2.1980 | <i>L. braziliensis</i> | 217 | 497  | 713  |
| LbrM26_V2.1980 | <i>L. braziliensis</i> | 50  | 818  | 867  |
| LbrM26_V2.1990 | <i>L. braziliensis</i> | 490 | 40   | 529  |
| LbrM26_V2.1990 | <i>L. braziliensis</i> | 300 | 545  | 844  |
| LbrM26_V2.1990 | <i>L. braziliensis</i> | 79  | 1233 | 1311 |
| LbrM26_V2.2000 | <i>L. braziliensis</i> | 78  | 1    | 78   |
| LbrM26_V2.2000 | <i>L. braziliensis</i> | 118 | 115  | 232  |
| LbrM26_V2.2020 | <i>L. braziliensis</i> | 77  | 74   | 150  |
| LbrM26_V2.2020 | <i>L. braziliensis</i> | 72  | 178  | 249  |
| LbrM26_V2.2020 | <i>L. braziliensis</i> | 110 | 252  | 361  |
| LbrM26_V2.2020 | <i>L. braziliensis</i> | 96  | 585  | 680  |
| LbrM26_V2.2020 | <i>L. braziliensis</i> | 113 | 751  | 863  |
| LbrM26_V2.2030 | <i>L. braziliensis</i> | 47  | 1    | 47   |
| LbrM26_V2.2030 | <i>L. braziliensis</i> | 147 | 100  | 246  |
| LbrM26_V2.2030 | <i>L. braziliensis</i> | 71  | 270  | 340  |
| LbrM26_V2.2030 | <i>L. braziliensis</i> | 51  | 428  | 478  |
| LbrM26_V2.2030 | <i>L. braziliensis</i> | 104 | 506  | 609  |
| LbrM26_V2.2030 | <i>L. braziliensis</i> | 141 | 665  | 805  |
| LbrM26_V2.2030 | <i>L. braziliensis</i> | 347 | 969  | 1315 |
| LbrM26_V2.2030 | <i>L. braziliensis</i> | 113 | 1412 | 1524 |
| LbrM26_V2.2030 | <i>L. braziliensis</i> | 207 | 1538 | 1744 |
| LbrM26_V2.2040 | <i>L. braziliensis</i> | 118 | 32   | 149  |
| LbrM26_V2.2040 | <i>L. braziliensis</i> | 62  | 154  | 215  |
| LbrM26_V2.2040 | <i>L. braziliensis</i> | 122 | 266  | 387  |
| LbrM26_V2.2040 | <i>L. braziliensis</i> | 56  | 396  | 451  |
| LbrM26_V2.2040 | <i>L. braziliensis</i> | 135 | 460  | 594  |
| LbrM26_V2.2040 | <i>L. braziliensis</i> | 245 | 635  | 879  |
| LbrM26_V2.2040 | <i>L. braziliensis</i> | 623 | 1061 | 1683 |



|                |                        |     |      |      |
|----------------|------------------------|-----|------|------|
| LbrM26_V2.2040 | <i>L. braziliensis</i> | 48  | 1700 | 1747 |
| LbrM26_V2.2040 | <i>L. braziliensis</i> | 167 | 1777 | 1943 |
| LbrM26_V2.2040 | <i>L. braziliensis</i> | 283 | 1973 | 2255 |
| LbrM26_V2.2040 | <i>L. braziliensis</i> | 437 | 2355 | 2791 |
| LbrM26_V2.2040 | <i>L. braziliensis</i> | 98  | 2810 | 2907 |
| LbrM26_V2.2040 | <i>L. braziliensis</i> | 110 | 2935 | 3044 |
| LbrM26_V2.2040 | <i>L. braziliensis</i> | 62  | 3050 | 3111 |
| LbrM26_V2.2040 | <i>L. braziliensis</i> | 140 | 3308 | 3447 |
| LbrM26_V2.2040 | <i>L. braziliensis</i> | 77  | 3483 | 3559 |
| LbrM26_V2.2040 | <i>L. braziliensis</i> | 126 | 3711 | 3836 |
| LbrM26_V2.2040 | <i>L. braziliensis</i> | 182 | 3870 | 4051 |
| LbrM26_V2.2040 | <i>L. braziliensis</i> | 90  | 4090 | 4179 |
| LbrM26_V2.2050 | <i>L. braziliensis</i> | 40  | 1    | 40   |
| LbrM26_V2.2050 | <i>L. braziliensis</i> | 43  | 172  | 214  |
| LbrM26_V2.2050 | <i>L. braziliensis</i> | 43  | 172  | 214  |
| LbrM26_V2.2070 | <i>L. braziliensis</i> | 40  | 295  | 334  |
| LbrM26_V2.2070 | <i>L. braziliensis</i> | 41  | 443  | 483  |
| LbrM26_V2.2070 | <i>L. braziliensis</i> | 41  | 443  | 483  |
| LbrM26_V2.2080 | <i>L. braziliensis</i> | 61  | 1    | 61   |
| LbrM26_V2.2080 | <i>L. braziliensis</i> | 106 | 144  | 249  |
| LbrM26_V2.2080 | <i>L. braziliensis</i> | 61  | 260  | 320  |
| LbrM26_V2.2080 | <i>L. braziliensis</i> | 46  | 347  | 392  |
| LbrM26_V2.2080 | <i>L. braziliensis</i> | 163 | 525  | 687  |
| LbrM26_V2.2080 | <i>L. braziliensis</i> | 227 | 768  | 994  |
| LbrM26_V2.2080 | <i>L. braziliensis</i> | 485 | 996  | 1480 |
| LbrM26_V2.2080 | <i>L. braziliensis</i> | 352 | 1491 | 1842 |
| LbrM26_V2.2080 | <i>L. braziliensis</i> | 64  | 1858 | 1921 |
| LbrM26_V2.2080 | <i>L. braziliensis</i> | 46  | 1933 | 1978 |
| LbrM26_V2.2080 | <i>L. braziliensis</i> | 184 | 1995 | 2178 |
| LbrM26_V2.2090 | <i>L. braziliensis</i> | 77  | 1    | 77   |
| LbrM26_V2.2090 | <i>L. braziliensis</i> | 116 | 153  | 268  |
| LbrM26_V2.2090 | <i>L. braziliensis</i> | 67  | 326  | 392  |
| LbrM26_V2.2090 | <i>L. braziliensis</i> | 101 | 410  | 510  |
| LbrM26_V2.2090 | <i>L. braziliensis</i> | 970 | 530  | 1499 |
| LbrM26_V2.2090 | <i>L. braziliensis</i> | 120 | 1805 | 1924 |
| LbrM26_V2.2100 | <i>L. braziliensis</i> | 356 | 66   | 421  |
| LbrM26_V2.2100 | <i>L. braziliensis</i> | 625 | 497  | 1121 |
| LbrM26_V2.2100 | <i>L. braziliensis</i> | 45  | 1166 | 1210 |
| LbrM26_V2.2100 | <i>L. braziliensis</i> | 92  | 1263 | 1354 |
| LbrM26_V2.2100 | <i>L. braziliensis</i> | 164 | 1376 | 1539 |
| LbrM26_V2.2110 | <i>L. braziliensis</i> | 65  | 43   | 107  |
| LbrM26_V2.2110 | <i>L. braziliensis</i> | 57  | 308  | 364  |
| LbrM26_V2.2120 | <i>L. braziliensis</i> | 238 | 1    | 238  |
| LbrM26_V2.2130 | <i>L. braziliensis</i> | 63  | 1    | 63   |
| LbrM26_V2.2130 | <i>L. braziliensis</i> | 205 | 133  | 337  |
| LbrM26_V2.2130 | <i>L. braziliensis</i> | 58  | 486  | 543  |
| LbrM26_V2.2130 | <i>L. braziliensis</i> | 119 | 589  | 707  |

|                |                        |     |      |      |
|----------------|------------------------|-----|------|------|
| LbrM26_V2.2160 | <i>L. braziliensis</i> | 46  | 1    | 46   |
| LbrM26_V2.2170 | <i>L. braziliensis</i> | 134 | 10   | 143  |
| LbrM26_V2.2170 | <i>L. braziliensis</i> | 142 | 209  | 350  |
| LbrM26_V2.2170 | <i>L. braziliensis</i> | 41  | 375  | 415  |
| LbrM26_V2.2170 | <i>L. braziliensis</i> | 66  | 516  | 581  |
| LbrM26_V2.2170 | <i>L. braziliensis</i> | 88  | 620  | 707  |
| LbrM26_V2.2180 | <i>L. braziliensis</i> | 91  | 444  | 534  |
| LbrM26_V2.2190 | <i>L. braziliensis</i> | 83  | 185  | 267  |
| LbrM26_V2.2210 | <i>L. braziliensis</i> | 123 | 13   | 135  |
| LbrM26_V2.2220 | <i>L. braziliensis</i> | 232 | 193  | 424  |
| LbrM26_V2.2220 | <i>L. braziliensis</i> | 110 | 676  | 785  |
| LbrM26_V2.2220 | <i>L. braziliensis</i> | 80  | 817  | 896  |
| LbrM26_V2.2220 | <i>L. braziliensis</i> | 42  | 971  | 1012 |
| LbrM26_V2.2220 | <i>L. braziliensis</i> | 75  | 1053 | 1127 |
| LbrM26_V2.2230 | <i>L. braziliensis</i> | 43  | 33   | 75   |
| LbrM26_V2.2240 | <i>L. braziliensis</i> | 105 | 22   | 126  |
| LbrM26_V2.2240 | <i>L. braziliensis</i> | 53  | 134  | 186  |
| LbrM26_V2.2240 | <i>L. braziliensis</i> | 64  | 218  | 281  |
| LbrM26_V2.2250 | <i>L. braziliensis</i> | 42  | 219  | 260  |
| LbrM26_V2.2250 | <i>L. braziliensis</i> | 110 | 278  | 387  |
| LbrM26_V2.2250 | <i>L. braziliensis</i> | 176 | 490  | 665  |
| LbrM26_V2.2260 | <i>L. braziliensis</i> | 43  | 1    | 43   |
| LbrM26_V2.2260 | <i>L. braziliensis</i> | 63  | 65   | 127  |
| LbrM26_V2.2260 | <i>L. braziliensis</i> | 63  | 65   | 127  |
| LbrM26_V2.2270 | <i>L. braziliensis</i> | 43  | 1    | 43   |
| LbrM26_V2.2270 | <i>L. braziliensis</i> | 63  | 65   | 127  |
| LbrM26_V2.2270 | <i>L. braziliensis</i> | 63  | 65   | 127  |
| LbrM26_V2.2280 | <i>L. braziliensis</i> | 102 | 1    | 102  |
| LbrM26_V2.2280 | <i>L. braziliensis</i> | 178 | 270  | 447  |
| LbrM26_V2.2280 | <i>L. braziliensis</i> | 88  | 477  | 564  |
| LbrM26_V2.2280 | <i>L. braziliensis</i> | 122 | 583  | 704  |
| LbrM26_V2.2280 | <i>L. braziliensis</i> | 128 | 723  | 850  |
| LbrM26_V2.2290 | <i>L. braziliensis</i> | 49  | 509  | 557  |
| LbrM26_V2.2300 | <i>L. braziliensis</i> | 56  | 110  | 165  |
| LbrM26_V2.2300 | <i>L. braziliensis</i> | 202 | 181  | 382  |
| LbrM26_V2.2300 | <i>L. braziliensis</i> | 76  | 412  | 487  |
| LbrM26_V2.2300 | <i>L. braziliensis</i> | 59  | 535  | 593  |
| LbrM26_V2.2300 | <i>L. braziliensis</i> | 166 | 612  | 777  |
| LbrM26_V2.2300 | <i>L. braziliensis</i> | 71  | 798  | 868  |
| LbrM26_V2.2300 | <i>L. braziliensis</i> | 82  | 945  | 1026 |
| LbrM26_V2.2300 | <i>L. braziliensis</i> | 49  | 1206 | 1254 |
| LbrM26_V2.2300 | <i>L. braziliensis</i> | 65  | 1377 | 1441 |
| LbrM26_V2.2300 | <i>L. braziliensis</i> | 60  | 1779 | 1838 |
| LbrM26_V2.2300 | <i>L. braziliensis</i> | 51  | 2234 | 2284 |
| LbrM26_V2.2300 | <i>L. braziliensis</i> | 44  | 2332 | 2375 |
| LbrM26_V2.2300 | <i>L. braziliensis</i> | 42  | 2381 | 2422 |
| LbrM26_V2.2300 | <i>L. braziliensis</i> | 164 | 2452 | 2615 |

|                |                        |     |      |      |
|----------------|------------------------|-----|------|------|
| LbrM26_V2.2300 | <i>L. braziliensis</i> | 136 | 3416 | 3551 |
| LbrM26_V2.2310 | <i>L. braziliensis</i> | 41  | 28   | 68   |
| LbrM26_V2.2310 | <i>L. braziliensis</i> | 74  | 103  | 176  |
| LbrM26_V2.2310 | <i>L. braziliensis</i> | 46  | 219  | 264  |
| LbrM26_V2.2310 | <i>L. braziliensis</i> | 55  | 2006 | 2060 |
| LbrM26_V2.2310 | <i>L. braziliensis</i> | 49  | 2321 | 2369 |
| LbrM26_V2.2310 | <i>L. braziliensis</i> | 105 | 2590 | 2694 |
| LbrM26_V2.2310 | <i>L. braziliensis</i> | 75  | 3567 | 3641 |
| LbrM26_V2.2310 | <i>L. braziliensis</i> | 44  | 3834 | 3877 |
| LbrM26_V2.2310 | <i>L. braziliensis</i> | 60  | 4175 | 4234 |
| LbrM26_V2.2310 | <i>L. braziliensis</i> | 42  | 4460 | 4501 |
| LbrM26_V2.2310 | <i>L. braziliensis</i> | 58  | 4523 | 4580 |
| LbrM26_V2.2310 | <i>L. braziliensis</i> | 66  | 4595 | 4660 |
| LbrM26_V2.2310 | <i>L. braziliensis</i> | 46  | 4837 | 4882 |
| LbrM26_V2.2310 | <i>L. braziliensis</i> | 177 | 4964 | 5140 |
| LbrM26_V2.2320 | <i>L. braziliensis</i> | 215 | 1    | 215  |
| LbrM26_V2.2320 | <i>L. braziliensis</i> | 100 | 374  | 473  |
| LbrM26_V2.2320 | <i>L. braziliensis</i> | 314 | 492  | 805  |
| LbrM26_V2.2340 | <i>L. braziliensis</i> | 80  | 1    | 80   |
| LbrM26_V2.2340 | <i>L. braziliensis</i> | 51  | 169  | 219  |
| LbrM26_V2.2340 | <i>L. braziliensis</i> | 51  | 169  | 219  |
| LbrM26_V2.2350 | <i>L. braziliensis</i> | 93  | 145  | 237  |
| LbrM26_V2.2370 | <i>L. braziliensis</i> | 281 | 1    | 281  |
| LbrM26_V2.2370 | <i>L. braziliensis</i> | 165 | 363  | 527  |
| LbrM26_V2.2370 | <i>L. braziliensis</i> | 76  | 787  | 862  |
| LbrM26_V2.2370 | <i>L. braziliensis</i> | 305 | 898  | 1202 |
| LbrM26_V2.2370 | <i>L. braziliensis</i> | 76  | 1206 | 1281 |
| LbrM26_V2.2380 | <i>L. braziliensis</i> | 68  | 86   | 153  |
| LbrM26_V2.2380 | <i>L. braziliensis</i> | 52  | 170  | 221  |
| LbrM26_V2.2380 | <i>L. braziliensis</i> | 52  | 170  | 221  |
| LbrM26_V2.2390 | <i>L. braziliensis</i> | 66  | 1    | 66   |
| LbrM26_V2.2390 | <i>L. braziliensis</i> | 81  | 117  | 197  |
| LbrM26_V2.2390 | <i>L. braziliensis</i> | 81  | 117  | 197  |
| LbrM26_V2.2420 | <i>L. braziliensis</i> | 114 | 1    | 114  |
| LbrM26_V2.2420 | <i>L. braziliensis</i> | 62  | 118  | 179  |
| LbrM26_V2.2420 | <i>L. braziliensis</i> | 173 | 219  | 391  |
| LbrM26_V2.2420 | <i>L. braziliensis</i> | 61  | 400  | 460  |
| LbrM26_V2.2420 | <i>L. braziliensis</i> | 296 | 474  | 769  |
| LbrM26_V2.2420 | <i>L. braziliensis</i> | 478 | 803  | 1280 |
| LbrM26_V2.2420 | <i>L. braziliensis</i> | 84  | 1310 | 1393 |
| LbrM26_V2.2420 | <i>L. braziliensis</i> | 77  | 1399 | 1475 |
| LbrM26_V2.2420 | <i>L. braziliensis</i> | 68  | 1499 | 1566 |
| LbrM26_V2.2460 | <i>L. braziliensis</i> | 119 | 74   | 192  |
| LbrM26_V2.2460 | <i>L. braziliensis</i> | 172 | 303  | 474  |
| LbrM26_V2.2470 | <i>L. braziliensis</i> | 65  | 1    | 65   |
| LbrM26_V2.2470 | <i>L. braziliensis</i> | 93  | 424  | 516  |
| LbrM26_V2.2470 | <i>L. braziliensis</i> | 93  | 424  | 516  |

|                |                        |     |      |      |
|----------------|------------------------|-----|------|------|
| LbrM26_V2.2480 | <i>L. braziliensis</i> | 106 | 1    | 106  |
| LbrM26_V2.2490 | <i>L. braziliensis</i> | 44  | 473  | 516  |
| LbrM26_V2.2510 | <i>L. braziliensis</i> | 73  | 79   | 151  |
| LbrM26_V2.2520 | <i>L. braziliensis</i> | 57  | 595  | 651  |
| LbrM26_V2.2530 | <i>L. braziliensis</i> | 40  | 38   | 77   |
| LbrM26_V2.2530 | <i>L. braziliensis</i> | 64  | 112  | 175  |
| LbrM26_V2.2530 | <i>L. braziliensis</i> | 40  | 184  | 223  |
| LbrM26_V2.2530 | <i>L. braziliensis</i> | 263 | 437  | 699  |
| LbrM26_V2.2570 | <i>L. braziliensis</i> | 115 | 118  | 232  |
| LbrM26_V2.2570 | <i>L. braziliensis</i> | 77  | 245  | 321  |
| LbrM26_V2.2580 | <i>L. braziliensis</i> | 57  | 114  | 170  |
| LbrM26_V2.2590 | <i>L. braziliensis</i> | 135 | 1    | 135  |
| LbrM26_V2.2590 | <i>L. braziliensis</i> | 527 | 144  | 670  |
| LbrM26_V2.2600 | <i>L. braziliensis</i> | 42  | 632  | 673  |
| LbrM26_V2.2650 | <i>L. braziliensis</i> | 161 | 27   | 187  |
| LbrM26_V2.2650 | <i>L. braziliensis</i> | 111 | 367  | 477  |
| LbrM26_V2.2650 | <i>L. braziliensis</i> | 40  | 694  | 733  |
| LbrM26_V2.2650 | <i>L. braziliensis</i> | 67  | 1268 | 1334 |
| LbrM27_V2.0020 | <i>L. braziliensis</i> | 52  | 116  | 167  |
| LbrM27_V2.0060 | <i>L. braziliensis</i> | 64  | 319  | 382  |
| LbrM27_V2.0060 | <i>L. braziliensis</i> | 71  | 620  | 690  |
| LbrM27_V2.0060 | <i>L. braziliensis</i> | 71  | 620  | 690  |
| LbrM27_V2.0090 | <i>L. braziliensis</i> | 52  | 42   | 93   |
| LbrM27_V2.0090 | <i>L. braziliensis</i> | 58  | 270  | 327  |
| LbrM27_V2.0090 | <i>L. braziliensis</i> | 58  | 270  | 327  |
| LbrM27_V2.0110 | <i>L. braziliensis</i> | 333 | 327  | 659  |
| LbrM27_V2.0130 | <i>L. braziliensis</i> | 57  | 353  | 409  |
| LbrM27_V2.0160 | <i>L. braziliensis</i> | 118 | 101  | 218  |
| LbrM27_V2.0180 | <i>L. braziliensis</i> | 45  | 1    | 45   |
| LbrM27_V2.0190 | <i>L. braziliensis</i> | 47  | 133  | 179  |
| LbrM27_V2.0210 | <i>L. braziliensis</i> | 75  | 256  | 330  |
| LbrM27_V2.0220 | <i>L. braziliensis</i> | 55  | 1    | 55   |
| LbrM27_V2.0250 | <i>L. braziliensis</i> | 831 | 1    | 831  |
| LbrM27_V2.0260 | <i>L. braziliensis</i> | 431 | 1    | 431  |
| LbrM27_V2.0270 | <i>L. braziliensis</i> | 73  | 92   | 164  |
| LbrM27_V2.0270 | <i>L. braziliensis</i> | 43  | 353  | 395  |
| LbrM27_V2.0270 | <i>L. braziliensis</i> | 43  | 353  | 395  |
| LbrM27_V2.0290 | <i>L. braziliensis</i> | 75  | 1    | 75   |
| LbrM27_V2.0290 | <i>L. braziliensis</i> | 81  | 126  | 206  |
| LbrM27_V2.0290 | <i>L. braziliensis</i> | 95  | 238  | 332  |
| LbrM27_V2.0290 | <i>L. braziliensis</i> | 51  | 375  | 425  |
| LbrM27_V2.0290 | <i>L. braziliensis</i> | 454 | 429  | 882  |
| LbrM27_V2.0290 | <i>L. braziliensis</i> | 76  | 920  | 995  |
| LbrM27_V2.0290 | <i>L. braziliensis</i> | 100 | 1013 | 1112 |
| LbrM27_V2.0320 | <i>L. braziliensis</i> | 42  | 617  | 658  |
| LbrM27_V2.0330 | <i>L. braziliensis</i> | 60  | 435  | 494  |
| LbrM27_V2.0340 | <i>L. braziliensis</i> | 118 | 1    | 118  |

|                |                        |     |      |      |
|----------------|------------------------|-----|------|------|
| LbrM27_V2.0340 | <i>L. braziliensis</i> | 146 | 180  | 325  |
| LbrM27_V2.0350 | <i>L. braziliensis</i> | 57  | 23   | 79   |
| LbrM27_V2.0350 | <i>L. braziliensis</i> | 46  | 384  | 429  |
| LbrM27_V2.0350 | <i>L. braziliensis</i> | 46  | 384  | 429  |
| LbrM27_V2.0360 | <i>L. braziliensis</i> | 151 | 350  | 500  |
| LbrM27_V2.0370 | <i>L. braziliensis</i> | 230 | 1    | 230  |
| LbrM27_V2.0370 | <i>L. braziliensis</i> | 98  | 235  | 332  |
| LbrM27_V2.0370 | <i>L. braziliensis</i> | 68  | 403  | 470  |
| LbrM27_V2.0370 | <i>L. braziliensis</i> | 73  | 472  | 544  |
| LbrM27_V2.0380 | <i>L. braziliensis</i> | 287 | 34   | 320  |
| LbrM27_V2.0380 | <i>L. braziliensis</i> | 95  | 561  | 655  |
| LbrM27_V2.0390 | <i>L. braziliensis</i> | 692 | 1    | 692  |
| LbrM27_V2.0390 | <i>L. braziliensis</i> | 184 | 698  | 881  |
| LbrM27_V2.0390 | <i>L. braziliensis</i> | 134 | 922  | 1055 |
| LbrM27_V2.0400 | <i>L. braziliensis</i> | 144 | 1    | 144  |
| LbrM27_V2.0400 | <i>L. braziliensis</i> | 111 | 154  | 264  |
| LbrM27_V2.0410 | <i>L. braziliensis</i> | 118 | 1    | 118  |
| LbrM27_V2.0410 | <i>L. braziliensis</i> | 65  | 137  | 201  |
| LbrM27_V2.0430 | <i>L. braziliensis</i> | 46  | 1    | 46   |
| LbrM27_V2.0430 | <i>L. braziliensis</i> | 50  | 506  | 555  |
| LbrM27_V2.0440 | <i>L. braziliensis</i> | 45  | 331  | 375  |
| LbrM27_V2.0470 | <i>L. braziliensis</i> | 148 | 18   | 165  |
| LbrM27_V2.0470 | <i>L. braziliensis</i> | 116 | 258  | 373  |
| LbrM27_V2.0480 | <i>L. braziliensis</i> | 56  | 516  | 571  |
| LbrM27_V2.0480 | <i>L. braziliensis</i> | 74  | 614  | 687  |
| LbrM27_V2.0480 | <i>L. braziliensis</i> | 74  | 614  | 687  |
| LbrM27_V2.0490 | <i>L. braziliensis</i> | 55  | 86   | 140  |
| LbrM27_V2.0500 | <i>L. braziliensis</i> | 89  | 101  | 189  |
| LbrM27_V2.0500 | <i>L. braziliensis</i> | 98  | 206  | 303  |
| LbrM27_V2.0500 | <i>L. braziliensis</i> | 98  | 206  | 303  |
| LbrM27_V2.0520 | <i>L. braziliensis</i> | 610 | 1    | 610  |
| LbrM27_V2.0530 | <i>L. braziliensis</i> | 59  | 437  | 495  |
| LbrM27_V2.0540 | <i>L. braziliensis</i> | 116 | 1    | 116  |
| LbrM27_V2.0550 | <i>L. braziliensis</i> | 52  | 1    | 52   |
| LbrM27_V2.0550 | <i>L. braziliensis</i> | 124 | 218  | 341  |
| LbrM27_V2.0550 | <i>L. braziliensis</i> | 146 | 383  | 528  |
| LbrM27_V2.0550 | <i>L. braziliensis</i> | 87  | 544  | 630  |
| LbrM27_V2.0560 | <i>L. braziliensis</i> | 55  | 86   | 140  |
| LbrM27_V2.0570 | <i>L. braziliensis</i> | 71  | 101  | 171  |
| LbrM27_V2.0590 | <i>L. braziliensis</i> | 76  | 355  | 430  |
| LbrM27_V2.0590 | <i>L. braziliensis</i> | 112 | 488  | 599  |
| LbrM27_V2.0600 | <i>L. braziliensis</i> | 60  | 574  | 633  |
| LbrM27_V2.0600 | <i>L. braziliensis</i> | 142 | 1219 | 1360 |
| LbrM27_V2.0600 | <i>L. braziliensis</i> | 74  | 1414 | 1487 |
| LbrM27_V2.0600 | <i>L. braziliensis</i> | 132 | 1489 | 1620 |
| LbrM27_V2.0600 | <i>L. braziliensis</i> | 82  | 1720 | 1801 |
| LbrM27_V2.0600 | <i>L. braziliensis</i> | 48  | 1893 | 1940 |

|                |                        |      |      |      |
|----------------|------------------------|------|------|------|
| LbrM27_V2.0600 | <i>L. braziliensis</i> | 1939 | 2000 | 3938 |
| LbrM27_V2.0600 | <i>L. braziliensis</i> | 122  | 4243 | 4364 |
| LbrM27_V2.0600 | <i>L. braziliensis</i> | 60   | 4913 | 4972 |
| LbrM27_V2.0610 | <i>L. braziliensis</i> | 73   | 1193 | 1265 |
| LbrM27_V2.0610 | <i>L. braziliensis</i> | 46   | 1286 | 1331 |
| LbrM27_V2.0610 | <i>L. braziliensis</i> | 111  | 1368 | 1478 |
| LbrM27_V2.0610 | <i>L. braziliensis</i> | 173  | 1490 | 1662 |
| LbrM27_V2.0610 | <i>L. braziliensis</i> | 60   | 1699 | 1758 |
| LbrM27_V2.0610 | <i>L. braziliensis</i> | 130  | 1767 | 1896 |
| LbrM27_V2.0610 | <i>L. braziliensis</i> | 216  | 1937 | 2152 |
| LbrM27_V2.0610 | <i>L. braziliensis</i> | 290  | 2185 | 2474 |
| LbrM27_V2.0610 | <i>L. braziliensis</i> | 139  | 2477 | 2615 |
| LbrM27_V2.0610 | <i>L. braziliensis</i> | 48   | 2653 | 2700 |
| LbrM27_V2.0610 | <i>L. braziliensis</i> | 48   | 2715 | 2762 |
| LbrM27_V2.0610 | <i>L. braziliensis</i> | 175  | 2788 | 2962 |
| LbrM27_V2.0610 | <i>L. braziliensis</i> | 454  | 2979 | 3432 |
| LbrM27_V2.0610 | <i>L. braziliensis</i> | 124  | 3505 | 3628 |
| LbrM27_V2.0610 | <i>L. braziliensis</i> | 116  | 3665 | 3780 |
| LbrM27_V2.0610 | <i>L. braziliensis</i> | 85   | 3826 | 3910 |
| LbrM27_V2.0610 | <i>L. braziliensis</i> | 323  | 3937 | 4259 |
| LbrM27_V2.0610 | <i>L. braziliensis</i> | 511  | 4266 | 4776 |
| LbrM27_V2.0610 | <i>L. braziliensis</i> | 221  | 4851 | 5071 |
| LbrM27_V2.0610 | <i>L. braziliensis</i> | 110  | 5078 | 5187 |
| LbrM27_V2.0610 | <i>L. braziliensis</i> | 350  | 5189 | 5538 |
| LbrM27_V2.0610 | <i>L. braziliensis</i> | 77   | 6088 | 6164 |
| LbrM27_V2.0630 | <i>L. braziliensis</i> | 176  | 1    | 176  |
| LbrM27_V2.0630 | <i>L. braziliensis</i> | 81   | 194  | 274  |
| LbrM27_V2.0640 | <i>L. braziliensis</i> | 124  | 131  | 254  |
| LbrM27_V2.0640 | <i>L. braziliensis</i> | 193  | 339  | 531  |
| LbrM27_V2.0680 | <i>L. braziliensis</i> | 176  | 187  | 362  |
| LbrM27_V2.0680 | <i>L. braziliensis</i> | 75   | 382  | 456  |
| LbrM27_V2.0680 | <i>L. braziliensis</i> | 58   | 487  | 544  |
| LbrM27_V2.0690 | <i>L. braziliensis</i> | 53   | 217  | 269  |
| LbrM27_V2.0700 | <i>L. braziliensis</i> | 106  | 42   | 147  |
| LbrM27_V2.0710 | <i>L. braziliensis</i> | 380  | 1    | 380  |
| LbrM27_V2.0710 | <i>L. braziliensis</i> | 87   | 411  | 497  |
| LbrM27_V2.0710 | <i>L. braziliensis</i> | 44   | 526  | 569  |
| LbrM27_V2.0710 | <i>L. braziliensis</i> | 82   | 654  | 735  |
| LbrM27_V2.0710 | <i>L. braziliensis</i> | 216  | 764  | 979  |
| LbrM27_V2.0720 | <i>L. braziliensis</i> | 362  | 86   | 447  |
| LbrM27_V2.0730 | <i>L. braziliensis</i> | 43   | 1    | 43   |
| LbrM27_V2.0740 | <i>L. braziliensis</i> | 46   | 81   | 126  |
| LbrM27_V2.0740 | <i>L. braziliensis</i> | 65   | 544  | 608  |
| LbrM27_V2.0740 | <i>L. braziliensis</i> | 65   | 544  | 608  |
| LbrM27_V2.0750 | <i>L. braziliensis</i> | 51   | 123  | 173  |
| LbrM27_V2.0770 | <i>L. braziliensis</i> | 98   | 1    | 98   |
| LbrM27_V2.0780 | <i>L. braziliensis</i> | 67   | 1    | 67   |

|                |                        |     |      |      |
|----------------|------------------------|-----|------|------|
| LbrM27_V2.0780 | <i>L. braziliensis</i> | 48  | 283  | 330  |
| LbrM27_V2.0780 | <i>L. braziliensis</i> | 47  | 366  | 412  |
| LbrM27_V2.0780 | <i>L. braziliensis</i> | 47  | 479  | 525  |
| LbrM27_V2.0780 | <i>L. braziliensis</i> | 41  | 842  | 882  |
| LbrM27_V2.0790 | <i>L. braziliensis</i> | 67  | 1    | 67   |
| LbrM27_V2.0790 | <i>L. braziliensis</i> | 99  | 85   | 183  |
| LbrM27_V2.0790 | <i>L. braziliensis</i> | 115 | 344  | 458  |
| LbrM27_V2.0800 | <i>L. braziliensis</i> | 308 | 67   | 374  |
| LbrM27_V2.0860 | <i>L. braziliensis</i> | 164 | 818  | 981  |
| LbrM27_V2.0860 | <i>L. braziliensis</i> | 55  | 1019 | 1073 |
| LbrM27_V2.0860 | <i>L. braziliensis</i> | 84  | 1221 | 1304 |
| LbrM27_V2.0870 | <i>L. braziliensis</i> | 45  | 156  | 200  |
| LbrM27_V2.0890 | <i>L. braziliensis</i> | 62  | 964  | 1025 |
| LbrM27_V2.0890 | <i>L. braziliensis</i> | 48  | 1290 | 1337 |
| LbrM27_V2.0890 | <i>L. braziliensis</i> | 42  | 1673 | 1714 |
| LbrM27_V2.0890 | <i>L. braziliensis</i> | 66  | 1820 | 1885 |
| LbrM27_V2.0890 | <i>L. braziliensis</i> | 54  | 2262 | 2315 |
| LbrM27_V2.0890 | <i>L. braziliensis</i> | 40  | 2404 | 2443 |
| LbrM27_V2.0890 | <i>L. braziliensis</i> | 57  | 2775 | 2831 |
| LbrM27_V2.0890 | <i>L. braziliensis</i> | 69  | 2854 | 2922 |
| LbrM27_V2.0890 | <i>L. braziliensis</i> | 154 | 3100 | 3253 |
| LbrM27_V2.0900 | <i>L. braziliensis</i> | 88  | 62   | 149  |
| LbrM27_V2.0900 | <i>L. braziliensis</i> | 50  | 211  | 260  |
| LbrM27_V2.0900 | <i>L. braziliensis</i> | 49  | 275  | 323  |
| LbrM27_V2.0920 | <i>L. braziliensis</i> | 75  | 25   | 99   |
| LbrM27_V2.0920 | <i>L. braziliensis</i> | 47  | 354  | 400  |
| LbrM27_V2.0920 | <i>L. braziliensis</i> | 122 | 417  | 538  |
| LbrM27_V2.0940 | <i>L. braziliensis</i> | 50  | 380  | 429  |
| LbrM27_V2.0940 | <i>L. braziliensis</i> | 44  | 621  | 664  |
| LbrM27_V2.0940 | <i>L. braziliensis</i> | 44  | 621  | 664  |
| LbrM27_V2.0960 | <i>L. braziliensis</i> | 60  | 948  | 1007 |
| LbrM27_V2.0970 | <i>L. braziliensis</i> | 161 | 76   | 236  |
| LbrM27_V2.0970 | <i>L. braziliensis</i> | 84  | 678  | 761  |
| LbrM27_V2.0970 | <i>L. braziliensis</i> | 135 | 978  | 1112 |
| LbrM27_V2.0970 | <i>L. braziliensis</i> | 96  | 1208 | 1303 |
| LbrM27_V2.0970 | <i>L. braziliensis</i> | 74  | 1438 | 1511 |
| LbrM27_V2.0990 | <i>L. braziliensis</i> | 40  | 416  | 455  |
| LbrM27_V2.1020 | <i>L. braziliensis</i> | 80  | 513  | 592  |
| LbrM27_V2.1030 | <i>L. braziliensis</i> | 142 | 191  | 332  |
| LbrM27_V2.1030 | <i>L. braziliensis</i> | 248 | 350  | 597  |
| LbrM27_V2.1050 | <i>L. braziliensis</i> | 55  | 35   | 89   |
| LbrM27_V2.1050 | <i>L. braziliensis</i> | 41  | 144  | 184  |
| LbrM27_V2.1050 | <i>L. braziliensis</i> | 41  | 1497 | 1537 |
| LbrM27_V2.1050 | <i>L. braziliensis</i> | 62  | 1818 | 1879 |
| LbrM27_V2.1060 | <i>L. braziliensis</i> | 54  | 104  | 157  |
| LbrM27_V2.1070 | <i>L. braziliensis</i> | 44  | 1    | 44   |
| LbrM27_V2.1070 | <i>L. braziliensis</i> | 47  | 81   | 127  |

|                |                        |     |     |     |
|----------------|------------------------|-----|-----|-----|
| LbrM27_V2.1070 | <i>L. braziliensis</i> | 60  | 184 | 243 |
| LbrM27_V2.1090 | <i>L. braziliensis</i> | 44  | 1   | 44  |
| LbrM27_V2.1090 | <i>L. braziliensis</i> | 62  | 858 | 919 |
| LbrM27_V2.1090 | <i>L. braziliensis</i> | 62  | 858 | 919 |
| LbrM27_V2.1110 | <i>L. braziliensis</i> | 183 | 1   | 183 |
| LbrM27_V2.1110 | <i>L. braziliensis</i> | 56  | 479 | 534 |
| LbrM27_V2.1110 | <i>L. braziliensis</i> | 44  | 783 | 826 |
| LbrM27_V2.1120 | <i>L. braziliensis</i> | 126 | 1   | 126 |
| LbrM27_V2.1120 | <i>L. braziliensis</i> | 43  | 189 | 231 |
| LbrM27_V2.1120 | <i>L. braziliensis</i> | 78  | 288 | 365 |
| LbrM27_V2.1130 | <i>L. braziliensis</i> | 45  | 1   | 45  |
| LbrM27_V2.1140 | <i>L. braziliensis</i> | 89  | 1   | 89  |
| LbrM27_V2.1160 | <i>L. braziliensis</i> | 44  | 65  | 108 |
| LbrM27_V2.1160 | <i>L. braziliensis</i> | 72  | 213 | 284 |
| LbrM27_V2.1160 | <i>L. braziliensis</i> | 105 | 561 | 665 |
| LbrM27_V2.1160 | <i>L. braziliensis</i> | 49  | 781 | 829 |
| LbrM27_V2.1170 | <i>L. braziliensis</i> | 104 | 1   | 104 |
| LbrM27_V2.1170 | <i>L. braziliensis</i> | 44  | 608 | 651 |
| LbrM27_V2.1170 | <i>L. braziliensis</i> | 45  | 836 | 880 |
| LbrM27_V2.1190 | <i>L. braziliensis</i> | 78  | 150 | 227 |
| LbrM27_V2.1190 | <i>L. braziliensis</i> | 197 | 278 | 474 |
| LbrM27_V2.1190 | <i>L. braziliensis</i> | 185 | 476 | 660 |
| LbrM27_V2.1200 | <i>L. braziliensis</i> | 103 | 1   | 103 |
| LbrM27_V2.1200 | <i>L. braziliensis</i> | 44  | 192 | 235 |
| LbrM27_V2.1210 | <i>L. braziliensis</i> | 88  | 137 | 224 |
| LbrM27_V2.1220 | <i>L. braziliensis</i> | 63  | 1   | 63  |
| LbrM27_V2.1230 | <i>L. braziliensis</i> | 171 | 1   | 171 |
| LbrM27_V2.1230 | <i>L. braziliensis</i> | 109 | 702 | 810 |
| LbrM27_V2.1240 | <i>L. braziliensis</i> | 57  | 33  | 89  |
| LbrM27_V2.1240 | <i>L. braziliensis</i> | 397 | 158 | 554 |
| LbrM27_V2.1250 | <i>L. braziliensis</i> | 40  | 74  | 113 |
| LbrM27_V2.1260 | <i>L. braziliensis</i> | 77  | 59  | 135 |
| LbrM27_V2.1260 | <i>L. braziliensis</i> | 47  | 699 | 745 |
| LbrM27_V2.1270 | <i>L. braziliensis</i> | 48  | 49  | 96  |
| LbrM27_V2.1270 | <i>L. braziliensis</i> | 93  | 153 | 245 |
| LbrM27_V2.1280 | <i>L. braziliensis</i> | 56  | 141 | 196 |
| LbrM27_V2.1290 | <i>L. braziliensis</i> | 112 | 1   | 112 |
| LbrM27_V2.1300 | <i>L. braziliensis</i> | 174 | 42  | 215 |
| LbrM27_V2.1300 | <i>L. braziliensis</i> | 156 | 266 | 421 |
| LbrM27_V2.1310 | <i>L. braziliensis</i> | 149 | 1   | 149 |
| LbrM27_V2.1310 | <i>L. braziliensis</i> | 61  | 449 | 509 |
| LbrM27_V2.1320 | <i>L. braziliensis</i> | 90  | 1   | 90  |
| LbrM27_V2.1320 | <i>L. braziliensis</i> | 157 | 94  | 250 |
| LbrM27_V2.1320 | <i>L. braziliensis</i> | 157 | 94  | 250 |
| LbrM27_V2.1330 | <i>L. braziliensis</i> | 43  | 1   | 43  |
| LbrM27_V2.1330 | <i>L. braziliensis</i> | 76  | 205 | 280 |
| LbrM27_V2.1330 | <i>L. braziliensis</i> | 187 | 332 | 518 |



|                |                        |     |      |      |
|----------------|------------------------|-----|------|------|
| LbrM27_V2.1390 | <i>L. braziliensis</i> | 157 | 75   | 231  |
| LbrM27_V2.1400 | <i>L. braziliensis</i> | 152 | 1    | 152  |
| LbrM27_V2.1400 | <i>L. braziliensis</i> | 74  | 238  | 311  |
| LbrM27_V2.1400 | <i>L. braziliensis</i> | 55  | 321  | 375  |
| LbrM27_V2.1420 | <i>L. braziliensis</i> | 65  | 1    | 65   |
| LbrM27_V2.1440 | <i>L. braziliensis</i> | 145 | 34   | 178  |
| LbrM27_V2.1440 | <i>L. braziliensis</i> | 52  | 478  | 529  |
| LbrM27_V2.1450 | <i>L. braziliensis</i> | 48  | 489  | 536  |
| LbrM27_V2.1460 | <i>L. braziliensis</i> | 66  | 193  | 258  |
| LbrM27_V2.1460 | <i>L. braziliensis</i> | 76  | 519  | 594  |
| LbrM27_V2.1480 | <i>L. braziliensis</i> | 42  | 73   | 114  |
| LbrM27_V2.1480 | <i>L. braziliensis</i> | 69  | 305  | 373  |
| LbrM27_V2.1490 | <i>L. braziliensis</i> | 65  | 105  | 169  |
| LbrM27_V2.1490 | <i>L. braziliensis</i> | 143 | 171  | 313  |
| LbrM27_V2.1500 | <i>L. braziliensis</i> | 85  | 17   | 101  |
| LbrM27_V2.1500 | <i>L. braziliensis</i> | 405 | 271  | 675  |
| LbrM27_V2.1510 | <i>L. braziliensis</i> | 183 | 1    | 183  |
| LbrM27_V2.1510 | <i>L. braziliensis</i> | 200 | 198  | 397  |
| LbrM27_V2.1510 | <i>L. braziliensis</i> | 117 | 404  | 520  |
| LbrM27_V2.1510 | <i>L. braziliensis</i> | 740 | 752  | 1491 |
| LbrM27_V2.1520 | <i>L. braziliensis</i> | 54  | 270  | 323  |
| LbrM27_V2.1530 | <i>L. braziliensis</i> | 54  | 270  | 323  |
| LbrM27_V2.1550 | <i>L. braziliensis</i> | 56  | 108  | 163  |
| LbrM27_V2.1560 | <i>L. braziliensis</i> | 202 | 55   | 256  |
| LbrM27_V2.1560 | <i>L. braziliensis</i> | 43  | 365  | 407  |
| LbrM27_V2.1570 | <i>L. braziliensis</i> | 46  | 380  | 425  |
| LbrM27_V2.1570 | <i>L. braziliensis</i> | 95  | 465  | 559  |
| LbrM27_V2.1570 | <i>L. braziliensis</i> | 44  | 608  | 651  |
| LbrM27_V2.1570 | <i>L. braziliensis</i> | 54  | 811  | 864  |
| LbrM27_V2.1580 | <i>L. braziliensis</i> | 215 | 1    | 215  |
| LbrM27_V2.1590 | <i>L. braziliensis</i> | 47  | 447  | 493  |
| LbrM27_V2.1590 | <i>L. braziliensis</i> | 212 | 644  | 855  |
| LbrM27_V2.1600 | <i>L. braziliensis</i> | 47  | 288  | 334  |
| LbrM27_V2.1610 | <i>L. braziliensis</i> | 77  | 1    | 77   |
| LbrM27_V2.1610 | <i>L. braziliensis</i> | 99  | 131  | 229  |
| LbrM27_V2.1610 | <i>L. braziliensis</i> | 67  | 265  | 331  |
| LbrM27_V2.1610 | <i>L. braziliensis</i> | 123 | 709  | 831  |
| LbrM27_V2.1610 | <i>L. braziliensis</i> | 54  | 852  | 905  |
| LbrM27_V2.1610 | <i>L. braziliensis</i> | 181 | 969  | 1149 |
| LbrM27_V2.1610 | <i>L. braziliensis</i> | 48  | 1189 | 1236 |
| LbrM27_V2.1610 | <i>L. braziliensis</i> | 50  | 1295 | 1344 |
| LbrM27_V2.1620 | <i>L. braziliensis</i> | 268 | 148  | 415  |
| LbrM27_V2.1620 | <i>L. braziliensis</i> | 52  | 434  | 485  |
| LbrM27_V2.1620 | <i>L. braziliensis</i> | 89  | 577  | 665  |
| LbrM27_V2.1640 | <i>L. braziliensis</i> | 58  | 1    | 58   |
| LbrM27_V2.1650 | <i>L. braziliensis</i> | 58  | 1    | 58   |
| LbrM27_V2.1660 | <i>L. braziliensis</i> | 45  | 244  | 288  |

|                |                        |     |      |      |
|----------------|------------------------|-----|------|------|
| LbrM27_V2.1670 | <i>L. braziliensis</i> | 170 | 312  | 481  |
| LbrM27_V2.1670 | <i>L. braziliensis</i> | 64  | 575  | 638  |
| LbrM27_V2.1670 | <i>L. braziliensis</i> | 64  | 575  | 638  |
| LbrM27_V2.1690 | <i>L. braziliensis</i> | 50  | 85   | 134  |
| LbrM27_V2.1700 | <i>L. braziliensis</i> | 101 | 1    | 101  |
| LbrM27_V2.1700 | <i>L. braziliensis</i> | 41  | 585  | 625  |
| LbrM27_V2.1700 | <i>L. braziliensis</i> | 51  | 839  | 889  |
| LbrM27_V2.1710 | <i>L. braziliensis</i> | 41  | 100  | 140  |
| LbrM27_V2.1710 | <i>L. braziliensis</i> | 112 | 219  | 330  |
| LbrM27_V2.1730 | <i>L. braziliensis</i> | 43  | 78   | 120  |
| LbrM27_V2.1760 | <i>L. braziliensis</i> | 66  | 76   | 141  |
| LbrM27_V2.1760 | <i>L. braziliensis</i> | 73  | 313  | 385  |
| LbrM27_V2.1760 | <i>L. braziliensis</i> | 74  | 719  | 792  |
| LbrM27_V2.1770 | <i>L. braziliensis</i> | 70  | 436  | 505  |
| LbrM27_V2.1770 | <i>L. braziliensis</i> | 89  | 598  | 686  |
| LbrM27_V2.1770 | <i>L. braziliensis</i> | 144 | 736  | 879  |
| LbrM27_V2.1780 | <i>L. braziliensis</i> | 76  | 100  | 175  |
| LbrM27_V2.1780 | <i>L. braziliensis</i> | 110 | 232  | 341  |
| LbrM27_V2.1780 | <i>L. braziliensis</i> | 248 | 356  | 603  |
| LbrM27_V2.1780 | <i>L. braziliensis</i> | 274 | 637  | 910  |
| LbrM27_V2.1780 | <i>L. braziliensis</i> | 88  | 943  | 1030 |
| LbrM27_V2.1780 | <i>L. braziliensis</i> | 93  | 1052 | 1144 |
| LbrM27_V2.1780 | <i>L. braziliensis</i> | 52  | 1167 | 1218 |
| LbrM27_V2.1780 | <i>L. braziliensis</i> | 56  | 1228 | 1283 |
| LbrM27_V2.1790 | <i>L. braziliensis</i> | 40  | 200  | 239  |
| LbrM27_V2.1820 | <i>L. braziliensis</i> | 87  | 1    | 87   |
| LbrM27_V2.1820 | <i>L. braziliensis</i> | 67  | 294  | 360  |
| LbrM27_V2.1840 | <i>L. braziliensis</i> | 114 | 1    | 114  |
| LbrM27_V2.1860 | <i>L. braziliensis</i> | 76  | 103  | 178  |
| LbrM27_V2.1860 | <i>L. braziliensis</i> | 121 | 219  | 339  |
| LbrM27_V2.1870 | <i>L. braziliensis</i> | 54  | 71   | 124  |
| LbrM27_V2.1870 | <i>L. braziliensis</i> | 74  | 186  | 259  |
| LbrM27_V2.1870 | <i>L. braziliensis</i> | 44  | 667  | 710  |
| LbrM27_V2.1870 | <i>L. braziliensis</i> | 52  | 2720 | 2771 |
| LbrM27_V2.1870 | <i>L. braziliensis</i> | 129 | 3048 | 3176 |
| LbrM27_V2.1870 | <i>L. braziliensis</i> | 83  | 3270 | 3352 |
| LbrM27_V2.1870 | <i>L. braziliensis</i> | 64  | 3567 | 3630 |
| LbrM27_V2.1870 | <i>L. braziliensis</i> | 76  | 4136 | 4211 |
| LbrM27_V2.1880 | <i>L. braziliensis</i> | 54  | 462  | 515  |
| LbrM27_V2.1900 | <i>L. braziliensis</i> | 95  | 1    | 95   |
| LbrM27_V2.1900 | <i>L. braziliensis</i> | 55  | 144  | 198  |
| LbrM27_V2.1900 | <i>L. braziliensis</i> | 47  | 513  | 559  |
| LbrM27_V2.1910 | <i>L. braziliensis</i> | 427 | 93   | 519  |
| LbrM27_V2.1910 | <i>L. braziliensis</i> | 103 | 544  | 646  |
| LbrM27_V2.1910 | <i>L. braziliensis</i> | 138 | 703  | 840  |
| LbrM27_V2.1960 | <i>L. braziliensis</i> | 88  | 12   | 99   |
| LbrM27_V2.1960 | <i>L. braziliensis</i> | 62  | 159  | 220  |

|                |                        |     |      |      |
|----------------|------------------------|-----|------|------|
| LbrM27_V2.1960 | <i>L. braziliensis</i> | 151 | 234  | 384  |
| LbrM27_V2.1960 | <i>L. braziliensis</i> | 243 | 413  | 655  |
| LbrM27_V2.1960 | <i>L. braziliensis</i> | 303 | 657  | 959  |
| LbrM27_V2.1960 | <i>L. braziliensis</i> | 57  | 984  | 1040 |
| LbrM27_V2.1960 | <i>L. braziliensis</i> | 174 | 1042 | 1215 |
| LbrM27_V2.1960 | <i>L. braziliensis</i> | 57  | 1240 | 1296 |
| LbrM27_V2.1960 | <i>L. braziliensis</i> | 238 | 1298 | 1535 |
| LbrM27_V2.1960 | <i>L. braziliensis</i> | 73  | 1621 | 1693 |
| LbrM27_V2.1960 | <i>L. braziliensis</i> | 146 | 1729 | 1874 |
| LbrM27_V2.1960 | <i>L. braziliensis</i> | 223 | 1903 | 2125 |
| LbrM27_V2.1960 | <i>L. braziliensis</i> | 127 | 2179 | 2305 |
| LbrM27_V2.1980 | <i>L. braziliensis</i> | 93  | 20   | 112  |
| LbrM27_V2.1980 | <i>L. braziliensis</i> | 98  | 173  | 270  |
| LbrM27_V2.1980 | <i>L. braziliensis</i> | 291 | 326  | 616  |
| LbrM27_V2.1980 | <i>L. braziliensis</i> | 73  | 839  | 911  |
| LbrM27_V2.1980 | <i>L. braziliensis</i> | 51  | 918  | 968  |
| LbrM27_V2.1980 | <i>L. braziliensis</i> | 179 | 1096 | 1274 |
| LbrM27_V2.1990 | <i>L. braziliensis</i> | 119 | 263  | 381  |
| LbrM27_V2.1990 | <i>L. braziliensis</i> | 43  | 566  | 608  |
| LbrM27_V2.1990 | <i>L. braziliensis</i> | 57  | 639  | 695  |
| LbrM27_V2.2000 | <i>L. braziliensis</i> | 59  | 1    | 59   |
| LbrM27_V2.2000 | <i>L. braziliensis</i> | 202 | 72   | 273  |
| LbrM27_V2.2000 | <i>L. braziliensis</i> | 71  | 335  | 405  |
| LbrM27_V2.2000 | <i>L. braziliensis</i> | 100 | 520  | 619  |
| LbrM27_V2.2000 | <i>L. braziliensis</i> | 282 | 621  | 902  |
| LbrM27_V2.2020 | <i>L. braziliensis</i> | 56  | 122  | 177  |
| LbrM27_V2.2020 | <i>L. braziliensis</i> | 44  | 188  | 231  |
| LbrM27_V2.2020 | <i>L. braziliensis</i> | 74  | 444  | 517  |
| LbrM27_V2.2030 | <i>L. braziliensis</i> | 76  | 517  | 592  |
| LbrM27_V2.2030 | <i>L. braziliensis</i> | 270 | 594  | 863  |
| LbrM27_V2.2040 | <i>L. braziliensis</i> | 65  | 83   | 147  |
| LbrM27_V2.2040 | <i>L. braziliensis</i> | 135 | 216  | 350  |
| LbrM27_V2.2040 | <i>L. braziliensis</i> | 49  | 707  | 755  |
| LbrM27_V2.2050 | <i>L. braziliensis</i> | 57  | 1    | 57   |
| LbrM27_V2.2060 | <i>L. braziliensis</i> | 46  | 68   | 113  |
| LbrM27_V2.2070 | <i>L. braziliensis</i> | 72  | 1    | 72   |
| LbrM27_V2.2070 | <i>L. braziliensis</i> | 142 | 87   | 228  |
| LbrM27_V2.2070 | <i>L. braziliensis</i> | 43  | 259  | 301  |
| LbrM27_V2.2070 | <i>L. braziliensis</i> | 132 | 415  | 546  |
| LbrM27_V2.2070 | <i>L. braziliensis</i> | 58  | 590  | 647  |
| LbrM27_V2.2070 | <i>L. braziliensis</i> | 104 | 995  | 1098 |
| LbrM27_V2.2070 | <i>L. braziliensis</i> | 52  | 1195 | 1246 |
| LbrM27_V2.2080 | <i>L. braziliensis</i> | 50  | 303  | 352  |
| LbrM27_V2.2090 | <i>L. braziliensis</i> | 198 | 30   | 227  |
| LbrM27_V2.2100 | <i>L. braziliensis</i> | 96  | 1    | 96   |
| LbrM27_V2.2100 | <i>L. braziliensis</i> | 109 | 136  | 244  |
| LbrM27_V2.2100 | <i>L. braziliensis</i> | 118 | 368  | 485  |

|                |                        |     |      |      |
|----------------|------------------------|-----|------|------|
| LbrM27_V2.2100 | <i>L. braziliensis</i> | 167 | 793  | 959  |
| LbrM27_V2.2110 | <i>L. braziliensis</i> | 69  | 56   | 124  |
| LbrM27_V2.2110 | <i>L. braziliensis</i> | 82  | 200  | 281  |
| LbrM27_V2.2110 | <i>L. braziliensis</i> | 119 | 564  | 682  |
| LbrM27_V2.2110 | <i>L. braziliensis</i> | 95  | 692  | 786  |
| LbrM27_V2.2110 | <i>L. braziliensis</i> | 106 | 816  | 921  |
| LbrM27_V2.2110 | <i>L. braziliensis</i> | 106 | 967  | 1072 |
| LbrM27_V2.2110 | <i>L. braziliensis</i> | 41  | 1097 | 1137 |
| LbrM27_V2.2110 | <i>L. braziliensis</i> | 148 | 1297 | 1444 |
| LbrM27_V2.2120 | <i>L. braziliensis</i> | 154 | 1    | 154  |
| LbrM27_V2.2120 | <i>L. braziliensis</i> | 179 | 260  | 438  |
| LbrM27_V2.2140 | <i>L. braziliensis</i> | 76  | 905  | 980  |
| LbrM27_V2.2140 | <i>L. braziliensis</i> | 54  | 1057 | 1110 |
| LbrM27_V2.2140 | <i>L. braziliensis</i> | 87  | 1162 | 1248 |
| LbrM27_V2.2140 | <i>L. braziliensis</i> | 96  | 1268 | 1363 |
| LbrM27_V2.2140 | <i>L. braziliensis</i> | 123 | 1398 | 1520 |
| LbrM27_V2.2140 | <i>L. braziliensis</i> | 153 | 1537 | 1689 |
| LbrM27_V2.2140 | <i>L. braziliensis</i> | 124 | 1738 | 1861 |
| LbrM27_V2.2140 | <i>L. braziliensis</i> | 153 | 1877 | 2029 |
| LbrM27_V2.2140 | <i>L. braziliensis</i> | 124 | 2078 | 2201 |
| LbrM27_V2.2140 | <i>L. braziliensis</i> | 153 | 2217 | 2369 |
| LbrM27_V2.2140 | <i>L. braziliensis</i> | 40  | 2418 | 2457 |
| LbrM27_V2.2140 | <i>L. braziliensis</i> | 107 | 2755 | 2861 |
| LbrM27_V2.2140 | <i>L. braziliensis</i> | 40  | 2903 | 2942 |
| LbrM27_V2.2140 | <i>L. braziliensis</i> | 76  | 3083 | 3158 |
| LbrM27_V2.2140 | <i>L. braziliensis</i> | 202 | 3518 | 3719 |
| LbrM27_V2.2140 | <i>L. braziliensis</i> | 40  | 3914 | 3953 |
| LbrM27_V2.2140 | <i>L. braziliensis</i> | 92  | 4195 | 4286 |
| LbrM27_V2.2140 | <i>L. braziliensis</i> | 121 | 4396 | 4516 |
| LbrM27_V2.2140 | <i>L. braziliensis</i> | 82  | 4530 | 4611 |
| LbrM27_V2.2140 | <i>L. braziliensis</i> | 64  | 4817 | 4880 |
| LbrM27_V2.2140 | <i>L. braziliensis</i> | 101 | 4945 | 5045 |
| LbrM27_V2.2140 | <i>L. braziliensis</i> | 128 | 5200 | 5327 |
| LbrM27_V2.2140 | <i>L. braziliensis</i> | 182 | 5332 | 5513 |
| LbrM27_V2.2150 | <i>L. braziliensis</i> | 112 | 24   | 135  |
| LbrM27_V2.2160 | <i>L. braziliensis</i> | 153 | 318  | 470  |
| LbrM27_V2.2160 | <i>L. braziliensis</i> | 65  | 477  | 541  |
| LbrM27_V2.2160 | <i>L. braziliensis</i> | 214 | 560  | 773  |
| LbrM27_V2.2160 | <i>L. braziliensis</i> | 99  | 829  | 927  |
| LbrM27_V2.2170 | <i>L. braziliensis</i> | 57  | 1    | 57   |
| LbrM27_V2.2170 | <i>L. braziliensis</i> | 184 | 105  | 288  |
| LbrM27_V2.2170 | <i>L. braziliensis</i> | 106 | 306  | 411  |
| LbrM27_V2.2170 | <i>L. braziliensis</i> | 89  | 471  | 559  |
| LbrM27_V2.2170 | <i>L. braziliensis</i> | 111 | 639  | 749  |
| LbrM27_V2.2170 | <i>L. braziliensis</i> | 53  | 923  | 975  |
| LbrM27_V2.2190 | <i>L. braziliensis</i> | 303 | 94   | 396  |
| LbrM27_V2.2190 | <i>L. braziliensis</i> | 52  | 434  | 485  |

|                |                        |     |      |      |
|----------------|------------------------|-----|------|------|
| LbrM27_V2.2220 | <i>L. braziliensis</i> | 49  | 180  | 228  |
| LbrM27_V2.2230 | <i>L. braziliensis</i> | 43  | 1    | 43   |
| LbrM27_V2.2240 | <i>L. braziliensis</i> | 50  | 74   | 123  |
| LbrM27_V2.2240 | <i>L. braziliensis</i> | 55  | 204  | 258  |
| LbrM27_V2.2240 | <i>L. braziliensis</i> | 101 | 285  | 385  |
| LbrM27_V2.2250 | <i>L. braziliensis</i> | 282 | 257  | 538  |
| LbrM27_V2.2280 | <i>L. braziliensis</i> | 55  | 89   | 143  |
| LbrM27_V2.2280 | <i>L. braziliensis</i> | 45  | 202  | 246  |
| LbrM27_V2.2280 | <i>L. braziliensis</i> | 100 | 319  | 418  |
| LbrM27_V2.2290 | <i>L. braziliensis</i> | 81  | 1    | 81   |
| LbrM27_V2.2290 | <i>L. braziliensis</i> | 42  | 111  | 152  |
| LbrM27_V2.2290 | <i>L. braziliensis</i> | 72  | 179  | 250  |
| LbrM27_V2.2290 | <i>L. braziliensis</i> | 41  | 288  | 328  |
| LbrM27_V2.2290 | <i>L. braziliensis</i> | 100 | 642  | 741  |
| LbrM27_V2.2290 | <i>L. braziliensis</i> | 87  | 871  | 957  |
| LbrM27_V2.2290 | <i>L. braziliensis</i> | 92  | 964  | 1055 |
| LbrM27_V2.2300 | <i>L. braziliensis</i> | 118 | 174  | 291  |
| LbrM27_V2.2310 | <i>L. braziliensis</i> | 281 | 124  | 404  |
| LbrM27_V2.2310 | <i>L. braziliensis</i> | 65  | 462  | 526  |
| LbrM27_V2.2310 | <i>L. braziliensis</i> | 56  | 649  | 704  |
| LbrM27_V2.2310 | <i>L. braziliensis</i> | 208 | 1180 | 1387 |
| LbrM27_V2.2310 | <i>L. braziliensis</i> | 54  | 1454 | 1507 |
| LbrM27_V2.2320 | <i>L. braziliensis</i> | 75  | 1    | 75   |
| LbrM27_V2.2320 | <i>L. braziliensis</i> | 146 | 117  | 262  |
| LbrM27_V2.2320 | <i>L. braziliensis</i> | 75  | 390  | 464  |
| LbrM27_V2.2320 | <i>L. braziliensis</i> | 44  | 597  | 640  |
| LbrM27_V2.2320 | <i>L. braziliensis</i> | 60  | 718  | 777  |
| LbrM27_V2.2350 | <i>L. braziliensis</i> | 48  | 160  | 207  |
| LbrM27_V2.2350 | <i>L. braziliensis</i> | 111 | 393  | 503  |
| LbrM27_V2.2350 | <i>L. braziliensis</i> | 210 | 964  | 1173 |
| LbrM27_V2.2350 | <i>L. braziliensis</i> | 142 | 1214 | 1355 |
| LbrM27_V2.2350 | <i>L. braziliensis</i> | 208 | 1383 | 1590 |
| LbrM27_V2.2380 | <i>L. braziliensis</i> | 124 | 1    | 124  |
| LbrM27_V2.2390 | <i>L. braziliensis</i> | 58  | 44   | 101  |
| LbrM27_V2.2400 | <i>L. braziliensis</i> | 66  | 200  | 265  |
| LbrM27_V2.2410 | <i>L. braziliensis</i> | 62  | 54   | 115  |
| LbrM27_V2.2410 | <i>L. braziliensis</i> | 44  | 197  | 240  |
| LbrM27_V2.2410 | <i>L. braziliensis</i> | 73  | 385  | 457  |
| LbrM27_V2.2410 | <i>L. braziliensis</i> | 80  | 632  | 711  |
| LbrM27_V2.2410 | <i>L. braziliensis</i> | 96  | 893  | 988  |
| LbrM27_V2.2410 | <i>L. braziliensis</i> | 56  | 1011 | 1066 |
| LbrM27_V2.2410 | <i>L. braziliensis</i> | 46  | 1862 | 1907 |
| LbrM27_V2.2410 | <i>L. braziliensis</i> | 92  | 1970 | 2061 |
| LbrM27_V2.2410 | <i>L. braziliensis</i> | 42  | 2164 | 2205 |
| LbrM27_V2.2420 | <i>L. braziliensis</i> | 121 | 199  | 319  |
| LbrM27_V2.2430 | <i>L. braziliensis</i> | 51  | 196  | 246  |
| LbrM27_V2.2440 | <i>L. braziliensis</i> | 67  | 211  | 277  |

|                |                        |     |      |      |
|----------------|------------------------|-----|------|------|
| LbrM27_V2.2440 | <i>L. braziliensis</i> | 51  | 314  | 364  |
| LbrM27_V2.2440 | <i>L. braziliensis</i> | 44  | 453  | 496  |
| LbrM27_V2.2440 | <i>L. braziliensis</i> | 58  | 679  | 736  |
| LbrM27_V2.2440 | <i>L. braziliensis</i> | 62  | 755  | 816  |
| LbrM27_V2.2440 | <i>L. braziliensis</i> | 107 | 903  | 1009 |
| LbrM27_V2.2440 | <i>L. braziliensis</i> | 51  | 1016 | 1066 |
| LbrM27_V2.2440 | <i>L. braziliensis</i> | 47  | 1078 | 1124 |
| LbrM27_V2.2450 | <i>L. braziliensis</i> | 459 | 48   | 506  |
| LbrM27_V2.2450 | <i>L. braziliensis</i> | 125 | 545  | 669  |
| LbrM27_V2.2470 | <i>L. braziliensis</i> | 58  | 662  | 719  |
| LbrM27_V2.2480 | <i>L. braziliensis</i> | 163 | 4    | 166  |
| LbrM27_V2.2480 | <i>L. braziliensis</i> | 51  | 643  | 693  |
| LbrM27_V2.2500 | <i>L. braziliensis</i> | 69  | 52   | 120  |
| LbrM27_V2.2530 | <i>L. braziliensis</i> | 106 | 54   | 159  |
| LbrM27_V2.2560 | <i>L. braziliensis</i> | 42  | 104  | 145  |
| LbrM27_V2.2570 | <i>L. braziliensis</i> | 48  | 162  | 209  |
| LbrM27_V2.2570 | <i>L. braziliensis</i> | 71  | 315  | 385  |
| LbrM27_V2.2570 | <i>L. braziliensis</i> | 71  | 315  | 385  |
| LbrM27_V2.2600 | <i>L. braziliensis</i> | 95  | 1    | 95   |
| LbrM27_V2.2600 | <i>L. braziliensis</i> | 202 | 188  | 389  |
| LbrM27_V2.2610 | <i>L. braziliensis</i> | 74  | 33   | 106  |
| LbrM27_V2.2610 | <i>L. braziliensis</i> | 82  | 150  | 231  |
| LbrM27_V2.2610 | <i>L. braziliensis</i> | 57  | 340  | 396  |
| LbrM27_V2.2630 | <i>L. braziliensis</i> | 46  | 1    | 46   |
| LbrM27_V2.2630 | <i>L. braziliensis</i> | 50  | 204  | 253  |
| LbrM27_V2.2630 | <i>L. braziliensis</i> | 50  | 204  | 253  |
| LbrM27_V2.2640 | <i>L. braziliensis</i> | 93  | 52   | 144  |
| LbrM27_V2.2640 | <i>L. braziliensis</i> | 339 | 212  | 550  |
| LbrM27_V2.2660 | <i>L. braziliensis</i> | 74  | 183  | 256  |
| LbrM27_V2.2660 | <i>L. braziliensis</i> | 45  | 386  | 430  |
| LbrM27_V2.2660 | <i>L. braziliensis</i> | 45  | 386  | 430  |
| LbrM27_V2.2680 | <i>L. braziliensis</i> | 86  | 459  | 544  |
| LbrM27_V2.2690 | <i>L. braziliensis</i> | 105 | 124  | 228  |
| LbrM27_V2.2700 | <i>L. braziliensis</i> | 61  | 411  | 471  |
| LbrM27_V2.2710 | <i>L. braziliensis</i> | 100 | 1    | 100  |
| LbrM27_V2.2710 | <i>L. braziliensis</i> | 60  | 470  | 529  |
| LbrM27_V2.2710 | <i>L. braziliensis</i> | 125 | 2747 | 2871 |
| LbrM27_V2.2710 | <i>L. braziliensis</i> | 75  | 3294 | 3368 |
| LbrM27_V2.2720 | <i>L. braziliensis</i> | 100 | 300  | 399  |
| LbrM27_V2.2720 | <i>L. braziliensis</i> | 53  | 526  | 578  |
| LbrM27_V2.2730 | <i>L. braziliensis</i> | 117 | 1    | 117  |
| LbrM27_V2.2730 | <i>L. braziliensis</i> | 83  | 166  | 248  |
| LbrM27_V2.2730 | <i>L. braziliensis</i> | 84  | 324  | 407  |
| LbrM27_V2.2740 | <i>L. braziliensis</i> | 254 | 69   | 322  |
| LbrM27_V2.2740 | <i>L. braziliensis</i> | 82  | 346  | 427  |
| LbrM27_V2.2740 | <i>L. braziliensis</i> | 67  | 589  | 655  |
| LbrM27_V2.2740 | <i>L. braziliensis</i> | 202 | 727  | 928  |

|                |                        |     |      |      |
|----------------|------------------------|-----|------|------|
| LbrM27_V2.2750 | <i>L. braziliensis</i> | 51  | 46   | 96   |
| LbrM27_V2.2750 | <i>L. braziliensis</i> | 74  | 335  | 408  |
| LbrM27_V2.2750 | <i>L. braziliensis</i> | 74  | 335  | 408  |
| LbrM27_V2.2760 | <i>L. braziliensis</i> | 128 | 134  | 261  |
| LbrM27_V2.2780 | <i>L. braziliensis</i> | 46  | 46   | 91   |
| LbrM27_V2.2790 | <i>L. braziliensis</i> | 61  | 1    | 61   |
| LbrM27_V2.2790 | <i>L. braziliensis</i> | 105 | 66   | 170  |
| LbrM27_V2.2790 | <i>L. braziliensis</i> | 93  | 176  | 268  |
| LbrM27_V2.2790 | <i>L. braziliensis</i> | 119 | 300  | 418  |
| LbrM27_V2.2790 | <i>L. braziliensis</i> | 51  | 464  | 514  |
| LbrM27_V2.2810 | <i>L. braziliensis</i> | 349 | 39   | 387  |
| LbrM27_V2.2830 | <i>L. braziliensis</i> | 599 | 39   | 637  |
| LbrM27_V2.2860 | <i>L. braziliensis</i> | 515 | 324  | 838  |
| LbrM27_V2.2860 | <i>L. braziliensis</i> | 795 | 859  | 1653 |
| LbrM27_V2.2860 | <i>L. braziliensis</i> | 110 | 1668 | 1777 |
| LbrM28_V2.0010 | <i>L. braziliensis</i> | 49  | 1    | 49   |
| LbrM28_V2.0010 | <i>L. braziliensis</i> | 53  | 192  | 244  |
| LbrM28_V2.0010 | <i>L. braziliensis</i> | 95  | 264  | 358  |
| LbrM28_V2.0010 | <i>L. braziliensis</i> | 173 | 571  | 743  |
| LbrM28_V2.0010 | <i>L. braziliensis</i> | 112 | 922  | 1033 |
| LbrM28_V2.0010 | <i>L. braziliensis</i> | 58  | 1824 | 1881 |
| LbrM28_V2.0020 | <i>L. braziliensis</i> | 40  | 509  | 548  |
| LbrM28_V2.0050 | <i>L. braziliensis</i> | 166 | 25   | 190  |
| LbrM28_V2.0050 | <i>L. braziliensis</i> | 66  | 223  | 288  |
| LbrM28_V2.0050 | <i>L. braziliensis</i> | 66  | 223  | 288  |
| LbrM28_V2.0060 | <i>L. braziliensis</i> | 57  | 1    | 57   |
| LbrM28_V2.0060 | <i>L. braziliensis</i> | 40  | 91   | 130  |
| LbrM28_V2.0060 | <i>L. braziliensis</i> | 255 | 149  | 403  |
| LbrM28_V2.0070 | <i>L. braziliensis</i> | 59  | 10   | 68   |
| LbrM28_V2.0090 | <i>L. braziliensis</i> | 72  | 220  | 291  |
| LbrM28_V2.0150 | <i>L. braziliensis</i> | 42  | 1327 | 1368 |
| LbrM28_V2.0170 | <i>L. braziliensis</i> | 82  | 1    | 82   |
| LbrM28_V2.0180 | <i>L. braziliensis</i> | 103 | 1    | 103  |
| LbrM28_V2.0200 | <i>L. braziliensis</i> | 50  | 1    | 50   |
| LbrM28_V2.0200 | <i>L. braziliensis</i> | 133 | 176  | 308  |
| LbrM28_V2.0200 | <i>L. braziliensis</i> | 73  | 346  | 418  |
| LbrM28_V2.0200 | <i>L. braziliensis</i> | 95  | 422  | 516  |
| LbrM28_V2.0210 | <i>L. braziliensis</i> | 48  | 84   | 131  |
| LbrM28_V2.0220 | <i>L. braziliensis</i> | 45  | 1    | 45   |
| LbrM28_V2.0230 | <i>L. braziliensis</i> | 51  | 307  | 357  |
| LbrM28_V2.0240 | <i>L. braziliensis</i> | 175 | 79   | 253  |
| LbrM28_V2.0270 | <i>L. braziliensis</i> | 41  | 122  | 162  |
| LbrM28_V2.0280 | <i>L. braziliensis</i> | 43  | 173  | 215  |
| LbrM28_V2.0290 | <i>L. braziliensis</i> | 68  | 79   | 146  |
| LbrM28_V2.0300 | <i>L. braziliensis</i> | 43  | 141  | 183  |
| LbrM28_V2.0310 | <i>L. braziliensis</i> | 158 | 1    | 158  |
| LbrM28_V2.0310 | <i>L. braziliensis</i> | 120 | 326  | 445  |

|                |                        |     |      |      |
|----------------|------------------------|-----|------|------|
| LbrM28_V2.0310 | <i>L. braziliensis</i> | 52  | 512  | 563  |
| LbrM28_V2.0310 | <i>L. braziliensis</i> | 67  | 596  | 662  |
| LbrM28_V2.0320 | <i>L. braziliensis</i> | 49  | 1    | 49   |
| LbrM28_V2.0340 | <i>L. braziliensis</i> | 58  | 240  | 297  |
| LbrM28_V2.0340 | <i>L. braziliensis</i> | 57  | 864  | 920  |
| LbrM28_V2.0340 | <i>L. braziliensis</i> | 57  | 864  | 920  |
| LbrM28_V2.0390 | <i>L. braziliensis</i> | 48  | 117  | 164  |
| LbrM28_V2.0400 | <i>L. braziliensis</i> | 83  | 1    | 83   |
| LbrM28_V2.0400 | <i>L. braziliensis</i> | 50  | 93   | 142  |
| LbrM28_V2.0400 | <i>L. braziliensis</i> | 53  | 237  | 289  |
| LbrM28_V2.0400 | <i>L. braziliensis</i> | 74  | 308  | 381  |
| LbrM28_V2.0400 | <i>L. braziliensis</i> | 99  | 427  | 525  |
| LbrM28_V2.0400 | <i>L. braziliensis</i> | 81  | 588  | 668  |
| LbrM28_V2.0400 | <i>L. braziliensis</i> | 59  | 723  | 781  |
| LbrM28_V2.0400 | <i>L. braziliensis</i> | 103 | 828  | 930  |
| LbrM28_V2.0410 | <i>L. braziliensis</i> | 139 | 81   | 219  |
| LbrM28_V2.0420 | <i>L. braziliensis</i> | 40  | 35   | 74   |
| LbrM28_V2.0420 | <i>L. braziliensis</i> | 74  | 284  | 357  |
| LbrM28_V2.0420 | <i>L. braziliensis</i> | 74  | 284  | 357  |
| LbrM28_V2.0450 | <i>L. braziliensis</i> | 44  | 246  | 289  |
| LbrM28_V2.0460 | <i>L. braziliensis</i> | 50  | 809  | 858  |
| LbrM28_V2.0470 | <i>L. braziliensis</i> | 96  | 1    | 96   |
| LbrM28_V2.0470 | <i>L. braziliensis</i> | 74  | 238  | 311  |
| LbrM28_V2.0470 | <i>L. braziliensis</i> | 74  | 238  | 311  |
| LbrM28_V2.0480 | <i>L. braziliensis</i> | 55  | 708  | 762  |
| LbrM28_V2.0490 | <i>L. braziliensis</i> | 44  | 165  | 208  |
| LbrM28_V2.0490 | <i>L. braziliensis</i> | 219 | 297  | 515  |
| LbrM28_V2.0500 | <i>L. braziliensis</i> | 60  | 48   | 107  |
| LbrM28_V2.0500 | <i>L. braziliensis</i> | 81  | 140  | 220  |
| LbrM28_V2.0500 | <i>L. braziliensis</i> | 81  | 140  | 220  |
| LbrM28_V2.0520 | <i>L. braziliensis</i> | 80  | 177  | 256  |
| LbrM28_V2.0550 | <i>L. braziliensis</i> | 151 | 198  | 348  |
| LbrM28_V2.0550 | <i>L. braziliensis</i> | 75  | 477  | 551  |
| LbrM28_V2.0550 | <i>L. braziliensis</i> | 92  | 583  | 674  |
| LbrM28_V2.0550 | <i>L. braziliensis</i> | 291 | 817  | 1107 |
| LbrM28_V2.0570 | <i>L. braziliensis</i> | 51  | 1    | 51   |
| LbrM28_V2.0580 | <i>L. braziliensis</i> | 64  | 239  | 302  |
| LbrM28_V2.0590 | <i>L. braziliensis</i> | 54  | 164  | 217  |
| LbrM28_V2.0600 | <i>L. braziliensis</i> | 67  | 146  | 212  |
| LbrM28_V2.0600 | <i>L. braziliensis</i> | 40  | 295  | 334  |
| LbrM28_V2.0600 | <i>L. braziliensis</i> | 177 | 397  | 573  |
| LbrM28_V2.0600 | <i>L. braziliensis</i> | 428 | 575  | 1002 |
| LbrM28_V2.0600 | <i>L. braziliensis</i> | 226 | 1020 | 1245 |
| LbrM28_V2.0600 | <i>L. braziliensis</i> | 210 | 1257 | 1466 |
| LbrM28_V2.0600 | <i>L. braziliensis</i> | 69  | 1476 | 1544 |
| LbrM28_V2.0610 | <i>L. braziliensis</i> | 261 | 89   | 349  |
| LbrM28_V2.0610 | <i>L. braziliensis</i> | 142 | 382  | 523  |



|                |                        |     |      |      |
|----------------|------------------------|-----|------|------|
| LbrM28_V2.0630 | <i>L. braziliensis</i> | 95  | 32   | 126  |
| LbrM28_V2.0630 | <i>L. braziliensis</i> | 40  | 340  | 379  |
| LbrM28_V2.0630 | <i>L. braziliensis</i> | 106 | 2794 | 2899 |
| LbrM28_V2.0630 | <i>L. braziliensis</i> | 82  | 3331 | 3412 |
| LbrM28_V2.0640 | <i>L. braziliensis</i> | 155 | 298  | 452  |
| LbrM28_V2.0700 | <i>L. braziliensis</i> | 88  | 146  | 233  |
| LbrM28_V2.0730 | <i>L. braziliensis</i> | 50  | 173  | 222  |
| LbrM28_V2.0730 | <i>L. braziliensis</i> | 56  | 258  | 313  |
| LbrM28_V2.0730 | <i>L. braziliensis</i> | 56  | 258  | 313  |
| LbrM28_V2.0750 | <i>L. braziliensis</i> | 107 | 1    | 107  |
| LbrM28_V2.0750 | <i>L. braziliensis</i> | 287 | 265  | 551  |
| LbrM28_V2.0770 | <i>L. braziliensis</i> | 54  | 65   | 118  |
| LbrM28_V2.0770 | <i>L. braziliensis</i> | 127 | 172  | 298  |
| LbrM28_V2.0770 | <i>L. braziliensis</i> | 43  | 348  | 390  |
| LbrM28_V2.0790 | <i>L. braziliensis</i> | 68  | 669  | 736  |
| LbrM28_V2.0810 | <i>L. braziliensis</i> | 44  | 53   | 96   |
| LbrM28_V2.0820 | <i>L. braziliensis</i> | 65  | 374  | 438  |
| LbrM28_V2.0860 | <i>L. braziliensis</i> | 77  | 39   | 115  |
| LbrM28_V2.0860 | <i>L. braziliensis</i> | 119 | 200  | 318  |
| LbrM28_V2.0860 | <i>L. braziliensis</i> | 88  | 336  | 423  |
| LbrM28_V2.0860 | <i>L. braziliensis</i> | 75  | 429  | 503  |
| LbrM28_V2.0880 | <i>L. braziliensis</i> | 77  | 67   | 143  |
| LbrM28_V2.0890 | <i>L. braziliensis</i> | 80  | 27   | 106  |
| LbrM28_V2.0900 | <i>L. braziliensis</i> | 75  | 49   | 123  |
| LbrM28_V2.0920 | <i>L. braziliensis</i> | 187 | 1    | 187  |
| LbrM28_V2.0920 | <i>L. braziliensis</i> | 71  | 709  | 779  |
| LbrM28_V2.0930 | <i>L. braziliensis</i> | 314 | 55   | 368  |
| LbrM28_V2.0940 | <i>L. braziliensis</i> | 111 | 98   | 208  |
| LbrM28_V2.0970 | <i>L. braziliensis</i> | 216 | 57   | 272  |
| LbrM28_V2.0970 | <i>L. braziliensis</i> | 44  | 279  | 322  |
| LbrM28_V2.0990 | <i>L. braziliensis</i> | 43  | 147  | 189  |
| LbrM28_V2.1000 | <i>L. braziliensis</i> | 77  | 335  | 411  |
| LbrM28_V2.1010 | <i>L. braziliensis</i> | 116 | 91   | 206  |
| LbrM28_V2.1010 | <i>L. braziliensis</i> | 69  | 225  | 293  |
| LbrM28_V2.1030 | <i>L. braziliensis</i> | 49  | 96   | 144  |
| LbrM28_V2.1040 | <i>L. braziliensis</i> | 47  | 1    | 47   |
| LbrM28_V2.1070 | <i>L. braziliensis</i> | 97  | 207  | 303  |
| LbrM28_V2.1070 | <i>L. braziliensis</i> | 51  | 746  | 796  |
| LbrM28_V2.1070 | <i>L. braziliensis</i> | 46  | 989  | 1034 |
| LbrM28_V2.1090 | <i>L. braziliensis</i> | 85  | 161  | 245  |
| LbrM28_V2.1090 | <i>L. braziliensis</i> | 40  | 337  | 376  |
| LbrM28_V2.1110 | <i>L. braziliensis</i> | 176 | 29   | 204  |
| LbrM28_V2.1110 | <i>L. braziliensis</i> | 92  | 263  | 354  |
| LbrM28_V2.1110 | <i>L. braziliensis</i> | 48  | 410  | 457  |
| LbrM28_V2.1110 | <i>L. braziliensis</i> | 113 | 473  | 585  |
| LbrM28_V2.1110 | <i>L. braziliensis</i> | 63  | 623  | 685  |
| LbrM28_V2.1110 | <i>L. braziliensis</i> | 190 | 694  | 883  |

|                |                        |     |      |      |
|----------------|------------------------|-----|------|------|
| LbrM28_V2.1120 | <i>L. braziliensis</i> | 71  | 1    | 71   |
| LbrM28_V2.1120 | <i>L. braziliensis</i> | 45  | 107  | 151  |
| LbrM28_V2.1130 | <i>L. braziliensis</i> | 407 | 1    | 407  |
| LbrM28_V2.1140 | <i>L. braziliensis</i> | 56  | 38   | 93   |
| LbrM28_V2.1140 | <i>L. braziliensis</i> | 217 | 127  | 343  |
| LbrM28_V2.1140 | <i>L. braziliensis</i> | 126 | 352  | 477  |
| LbrM28_V2.1140 | <i>L. braziliensis</i> | 48  | 629  | 676  |
| LbrM28_V2.1140 | <i>L. braziliensis</i> | 60  | 866  | 925  |
| LbrM28_V2.1140 | <i>L. braziliensis</i> | 41  | 950  | 990  |
| LbrM28_V2.1140 | <i>L. braziliensis</i> | 84  | 1235 | 1318 |
| LbrM28_V2.1140 | <i>L. braziliensis</i> | 161 | 1394 | 1554 |
| LbrM28_V2.1150 | <i>L. braziliensis</i> | 77  | 1    | 77   |
| LbrM28_V2.1150 | <i>L. braziliensis</i> | 54  | 96   | 149  |
| LbrM28_V2.1150 | <i>L. braziliensis</i> | 56  | 553  | 608  |
| LbrM28_V2.1150 | <i>L. braziliensis</i> | 91  | 641  | 731  |
| LbrM28_V2.1160 | <i>L. braziliensis</i> | 57  | 431  | 487  |
| LbrM28_V2.1160 | <i>L. braziliensis</i> | 61  | 610  | 670  |
| LbrM28_V2.1160 | <i>L. braziliensis</i> | 50  | 687  | 736  |
| LbrM28_V2.1180 | <i>L. braziliensis</i> | 186 | 200  | 385  |
| LbrM28_V2.1180 | <i>L. braziliensis</i> | 52  | 492  | 543  |
| LbrM28_V2.1180 | <i>L. braziliensis</i> | 51  | 717  | 767  |
| LbrM28_V2.1180 | <i>L. braziliensis</i> | 56  | 796  | 851  |
| LbrM28_V2.1200 | <i>L. braziliensis</i> | 49  | 1    | 49   |
| LbrM28_V2.1210 | <i>L. braziliensis</i> | 81  | 1    | 81   |
| LbrM28_V2.1230 | <i>L. braziliensis</i> | 54  | 248  | 301  |
| LbrM28_V2.1230 | <i>L. braziliensis</i> | 46  | 520  | 565  |
| LbrM28_V2.1230 | <i>L. braziliensis</i> | 46  | 520  | 565  |
| LbrM28_V2.1240 | <i>L. braziliensis</i> | 48  | 55   | 102  |
| LbrM28_V2.1240 | <i>L. braziliensis</i> | 854 | 461  | 1314 |
| LbrM28_V2.1240 | <i>L. braziliensis</i> | 166 | 1323 | 1488 |
| LbrM28_V2.1260 | <i>L. braziliensis</i> | 78  | 808  | 885  |
| LbrM28_V2.1270 | <i>L. braziliensis</i> | 68  | 33   | 100  |
| LbrM28_V2.1280 | <i>L. braziliensis</i> | 84  | 46   | 129  |
| LbrM28_V2.1300 | <i>L. braziliensis</i> | 43  | 278  | 320  |
| LbrM28_V2.1300 | <i>L. braziliensis</i> | 115 | 515  | 629  |
| LbrM28_V2.1310 | <i>L. braziliensis</i> | 49  | 1    | 49   |
| LbrM28_V2.1310 | <i>L. braziliensis</i> | 89  | 65   | 153  |
| LbrM28_V2.1310 | <i>L. braziliensis</i> | 89  | 180  | 268  |
| LbrM28_V2.1310 | <i>L. braziliensis</i> | 356 | 299  | 654  |
| LbrM28_V2.1320 | <i>L. braziliensis</i> | 162 | 162  | 323  |
| LbrM28_V2.1320 | <i>L. braziliensis</i> | 65  | 406  | 470  |
| LbrM28_V2.1340 | <i>L. braziliensis</i> | 42  | 29   | 70   |
| LbrM28_V2.1350 | <i>L. braziliensis</i> | 107 | 119  | 225  |
| LbrM28_V2.1350 | <i>L. braziliensis</i> | 126 | 314  | 439  |
| LbrM28_V2.1360 | <i>L. braziliensis</i> | 110 | 1    | 110  |
| LbrM28_V2.1360 | <i>L. braziliensis</i> | 92  | 170  | 261  |
| LbrM28_V2.1360 | <i>L. braziliensis</i> | 41  | 276  | 316  |

|                |                        |     |     |      |
|----------------|------------------------|-----|-----|------|
| LbrM28_V2.1360 | <i>L. braziliensis</i> | 53  | 463 | 515  |
| LbrM28_V2.1360 | <i>L. braziliensis</i> | 62  | 750 | 811  |
| LbrM28_V2.1360 | <i>L. braziliensis</i> | 143 | 975 | 1117 |
| LbrM28_V2.1370 | <i>L. braziliensis</i> | 92  | 103 | 194  |
| LbrM28_V2.1370 | <i>L. braziliensis</i> | 48  | 301 | 348  |
| LbrM28_V2.1380 | <i>L. braziliensis</i> | 55  | 1   | 55   |
| LbrM28_V2.1390 | <i>L. braziliensis</i> | 55  | 251 | 305  |
| LbrM28_V2.1390 | <i>L. braziliensis</i> | 50  | 340 | 389  |
| LbrM28_V2.1400 | <i>L. braziliensis</i> | 112 | 1   | 112  |
| LbrM28_V2.1410 | <i>L. braziliensis</i> | 76  | 1   | 76   |
| LbrM28_V2.1410 | <i>L. braziliensis</i> | 360 | 538 | 897  |
| LbrM28_V2.1430 | <i>L. braziliensis</i> | 57  | 1   | 57   |
| LbrM28_V2.1430 | <i>L. braziliensis</i> | 102 | 71  | 172  |
| LbrM28_V2.1440 | <i>L. braziliensis</i> | 64  | 23  | 86   |
| LbrM28_V2.1450 | <i>L. braziliensis</i> | 109 | 47  | 155  |
| LbrM28_V2.1450 | <i>L. braziliensis</i> | 89  | 193 | 281  |
| LbrM28_V2.1450 | <i>L. braziliensis</i> | 179 | 351 | 529  |
| LbrM28_V2.1450 | <i>L. braziliensis</i> | 59  | 898 | 956  |
| LbrM28_V2.1460 | <i>L. braziliensis</i> | 47  | 345 | 391  |
| LbrM28_V2.1460 | <i>L. braziliensis</i> | 43  | 734 | 776  |
| LbrM28_V2.1460 | <i>L. braziliensis</i> | 43  | 734 | 776  |
| LbrM28_V2.1470 | <i>L. braziliensis</i> | 120 | 1   | 120  |
| LbrM28_V2.1470 | <i>L. braziliensis</i> | 250 | 152 | 401  |
| LbrM28_V2.1470 | <i>L. braziliensis</i> | 291 | 415 | 705  |
| LbrM28_V2.1470 | <i>L. braziliensis</i> | 70  | 973 | 1042 |
| LbrM28_V2.1540 | <i>L. braziliensis</i> | 106 | 1   | 106  |
| LbrM28_V2.1550 | <i>L. braziliensis</i> | 200 | 82  | 281  |
| LbrM28_V2.1560 | <i>L. braziliensis</i> | 332 | 66  | 397  |
| LbrM28_V2.1570 | <i>L. braziliensis</i> | 128 | 1   | 128  |
| LbrM28_V2.1570 | <i>L. braziliensis</i> | 134 | 621 | 754  |
| LbrM28_V2.1580 | <i>L. braziliensis</i> | 126 | 1   | 126  |
| LbrM28_V2.1580 | <i>L. braziliensis</i> | 64  | 131 | 194  |
| LbrM28_V2.1590 | <i>L. braziliensis</i> | 78  | 61  | 138  |
| LbrM28_V2.1600 | <i>L. braziliensis</i> | 54  | 1   | 54   |
| LbrM28_V2.1600 | <i>L. braziliensis</i> | 73  | 287 | 359  |
| LbrM28_V2.1600 | <i>L. braziliensis</i> | 73  | 287 | 359  |
| LbrM28_V2.1610 | <i>L. braziliensis</i> | 90  | 17  | 106  |
| LbrM28_V2.1610 | <i>L. braziliensis</i> | 43  | 147 | 189  |
| LbrM28_V2.1610 | <i>L. braziliensis</i> | 50  | 248 | 297  |
| LbrM28_V2.1610 | <i>L. braziliensis</i> | 44  | 436 | 479  |
| LbrM28_V2.1610 | <i>L. braziliensis</i> | 60  | 511 | 570  |
| LbrM28_V2.1620 | <i>L. braziliensis</i> | 47  | 338 | 384  |
| LbrM28_V2.1630 | <i>L. braziliensis</i> | 62  | 1   | 62   |
| LbrM28_V2.1640 | <i>L. braziliensis</i> | 62  | 1   | 62   |
| LbrM28_V2.1680 | <i>L. braziliensis</i> | 166 | 1   | 166  |
| LbrM28_V2.1690 | <i>L. braziliensis</i> | 67  | 192 | 258  |
| LbrM28_V2.1690 | <i>L. braziliensis</i> | 344 | 299 | 642  |

|                |                        |     |      |      |
|----------------|------------------------|-----|------|------|
| LbrM28_V2.1710 | <i>L. braziliensis</i> | 53  | 1    | 53   |
| LbrM28_V2.1710 | <i>L. braziliensis</i> | 199 | 61   | 259  |
| LbrM28_V2.1710 | <i>L. braziliensis</i> | 43  | 299  | 341  |
| LbrM28_V2.1710 | <i>L. braziliensis</i> | 103 | 560  | 662  |
| LbrM28_V2.1710 | <i>L. braziliensis</i> | 56  | 796  | 851  |
| LbrM28_V2.1720 | <i>L. braziliensis</i> | 49  | 152  | 200  |
| LbrM28_V2.1730 | <i>L. braziliensis</i> | 126 | 85   | 210  |
| LbrM28_V2.1730 | <i>L. braziliensis</i> | 101 | 246  | 346  |
| LbrM28_V2.1730 | <i>L. braziliensis</i> | 137 | 423  | 559  |
| LbrM28_V2.1770 | <i>L. braziliensis</i> | 46  | 1    | 46   |
| LbrM28_V2.1770 | <i>L. braziliensis</i> | 76  | 85   | 160  |
| LbrM28_V2.1770 | <i>L. braziliensis</i> | 48  | 463  | 510  |
| LbrM28_V2.1770 | <i>L. braziliensis</i> | 102 | 958  | 1059 |
| LbrM28_V2.1780 | <i>L. braziliensis</i> | 118 | 1    | 118  |
| LbrM28_V2.1780 | <i>L. braziliensis</i> | 164 | 166  | 329  |
| LbrM28_V2.1790 | <i>L. braziliensis</i> | 199 | 47   | 245  |
| LbrM28_V2.1790 | <i>L. braziliensis</i> | 58  | 792  | 849  |
| LbrM28_V2.1810 | <i>L. braziliensis</i> | 86  | 247  | 332  |
| LbrM28_V2.1810 | <i>L. braziliensis</i> | 42  | 436  | 477  |
| LbrM28_V2.1810 | <i>L. braziliensis</i> | 74  | 541  | 614  |
| LbrM28_V2.1820 | <i>L. braziliensis</i> | 52  | 161  | 212  |
| LbrM28_V2.1820 | <i>L. braziliensis</i> | 74  | 330  | 403  |
| LbrM28_V2.1820 | <i>L. braziliensis</i> | 80  | 446  | 525  |
| LbrM28_V2.1820 | <i>L. braziliensis</i> | 48  | 751  | 798  |
| LbrM28_V2.1820 | <i>L. braziliensis</i> | 183 | 805  | 987  |
| LbrM28_V2.1820 | <i>L. braziliensis</i> | 285 | 1017 | 1301 |
| LbrM28_V2.1830 | <i>L. braziliensis</i> | 520 | 225  | 744  |
| LbrM28_V2.1840 | <i>L. braziliensis</i> | 173 | 31   | 203  |
| LbrM28_V2.1840 | <i>L. braziliensis</i> | 41  | 266  | 306  |
| LbrM28_V2.1850 | <i>L. braziliensis</i> | 50  | 14   | 63   |
| LbrM28_V2.1850 | <i>L. braziliensis</i> | 44  | 65   | 108  |
| LbrM28_V2.1850 | <i>L. braziliensis</i> | 152 | 264  | 415  |
| LbrM28_V2.1850 | <i>L. braziliensis</i> | 138 | 492  | 629  |
| LbrM28_V2.1850 | <i>L. braziliensis</i> | 54  | 980  | 1033 |
| LbrM28_V2.1850 | <i>L. braziliensis</i> | 134 | 1180 | 1313 |
| LbrM28_V2.1870 | <i>L. braziliensis</i> | 107 | 1    | 107  |
| LbrM28_V2.1880 | <i>L. braziliensis</i> | 78  | 49   | 126  |
| LbrM28_V2.1880 | <i>L. braziliensis</i> | 116 | 160  | 275  |
| LbrM28_V2.1880 | <i>L. braziliensis</i> | 45  | 287  | 331  |
| LbrM28_V2.1880 | <i>L. braziliensis</i> | 42  | 341  | 382  |
| LbrM28_V2.1880 | <i>L. braziliensis</i> | 138 | 403  | 540  |
| LbrM28_V2.1880 | <i>L. braziliensis</i> | 133 | 561  | 693  |
| LbrM28_V2.1880 | <i>L. braziliensis</i> | 41  | 787  | 827  |
| LbrM28_V2.1880 | <i>L. braziliensis</i> | 203 | 879  | 1081 |
| LbrM28_V2.1880 | <i>L. braziliensis</i> | 375 | 1138 | 1512 |
| LbrM28_V2.1880 | <i>L. braziliensis</i> | 86  | 1605 | 1690 |
| LbrM28_V2.1880 | <i>L. braziliensis</i> | 118 | 1692 | 1809 |

|                |                        |     |      |      |
|----------------|------------------------|-----|------|------|
| LbrM28_V2.1880 | <i>L. braziliensis</i> | 90  | 2019 | 2108 |
| LbrM28_V2.1890 | <i>L. braziliensis</i> | 260 | 32   | 291  |
| LbrM28_V2.1890 | <i>L. braziliensis</i> | 81  | 323  | 403  |
| LbrM28_V2.1890 | <i>L. braziliensis</i> | 49  | 416  | 464  |
| LbrM28_V2.1890 | <i>L. braziliensis</i> | 52  | 555  | 606  |
| LbrM28_V2.1900 | <i>L. braziliensis</i> | 54  | 288  | 341  |
| LbrM28_V2.1900 | <i>L. braziliensis</i> | 105 | 823  | 927  |
| LbrM28_V2.1910 | <i>L. braziliensis</i> | 115 | 116  | 230  |
| LbrM28_V2.1910 | <i>L. braziliensis</i> | 81  | 402  | 482  |
| LbrM28_V2.1920 | <i>L. braziliensis</i> | 84  | 55   | 138  |
| LbrM28_V2.1920 | <i>L. braziliensis</i> | 117 | 190  | 306  |
| LbrM28_V2.1920 | <i>L. braziliensis</i> | 57  | 388  | 444  |
| LbrM28_V2.1920 | <i>L. braziliensis</i> | 111 | 520  | 630  |
| LbrM28_V2.1920 | <i>L. braziliensis</i> | 56  | 652  | 707  |
| LbrM28_V2.1920 | <i>L. braziliensis</i> | 85  | 791  | 875  |
| LbrM28_V2.1930 | <i>L. braziliensis</i> | 70  | 84   | 153  |
| LbrM28_V2.1930 | <i>L. braziliensis</i> | 93  | 190  | 282  |
| LbrM28_V2.1930 | <i>L. braziliensis</i> | 143 | 899  | 1041 |
| LbrM28_V2.1930 | <i>L. braziliensis</i> | 207 | 1341 | 1547 |
| LbrM28_V2.1930 | <i>L. braziliensis</i> | 43  | 1968 | 2010 |
| LbrM28_V2.1940 | <i>L. braziliensis</i> | 59  | 85   | 143  |
| LbrM28_V2.1940 | <i>L. braziliensis</i> | 95  | 169  | 263  |
| LbrM28_V2.1940 | <i>L. braziliensis</i> | 95  | 169  | 263  |
| LbrM28_V2.1950 | <i>L. braziliensis</i> | 44  | 685  | 728  |
| LbrM28_V2.1950 | <i>L. braziliensis</i> | 42  | 825  | 866  |
| LbrM28_V2.1950 | <i>L. braziliensis</i> | 42  | 825  | 866  |
| LbrM28_V2.1960 | <i>L. braziliensis</i> | 91  | 396  | 486  |
| LbrM28_V2.1970 | <i>L. braziliensis</i> | 47  | 1    | 47   |
| LbrM28_V2.1970 | <i>L. braziliensis</i> | 287 | 208  | 494  |
| LbrM28_V2.1970 | <i>L. braziliensis</i> | 113 | 793  | 905  |
| LbrM28_V2.1970 | <i>L. braziliensis</i> | 66  | 1048 | 1113 |
| LbrM28_V2.1970 | <i>L. braziliensis</i> | 41  | 1355 | 1395 |
| LbrM28_V2.1970 | <i>L. braziliensis</i> | 43  | 1556 | 1598 |
| LbrM28_V2.1970 | <i>L. braziliensis</i> | 40  | 1663 | 1702 |
| LbrM28_V2.1970 | <i>L. braziliensis</i> | 103 | 1745 | 1847 |
| LbrM28_V2.1970 | <i>L. braziliensis</i> | 65  | 1905 | 1969 |
| LbrM28_V2.1970 | <i>L. braziliensis</i> | 58  | 2000 | 2057 |
| LbrM28_V2.1970 | <i>L. braziliensis</i> | 58  | 2083 | 2140 |
| LbrM28_V2.1970 | <i>L. braziliensis</i> | 49  | 2249 | 2297 |
| LbrM28_V2.1970 | <i>L. braziliensis</i> | 79  | 2341 | 2419 |
| LbrM28_V2.1970 | <i>L. braziliensis</i> | 104 | 2497 | 2600 |
| LbrM28_V2.1970 | <i>L. braziliensis</i> | 52  | 2852 | 2903 |
| LbrM28_V2.1980 | <i>L. braziliensis</i> | 72  | 33   | 104  |
| LbrM28_V2.1990 | <i>L. braziliensis</i> | 53  | 395  | 447  |
| LbrM28_V2.2000 | <i>L. braziliensis</i> | 392 | 1    | 392  |
| LbrM28_V2.2000 | <i>L. braziliensis</i> | 47  | 501  | 547  |
| LbrM28_V2.2000 | <i>L. braziliensis</i> | 53  | 904  | 956  |

|                |                        |     |      |      |
|----------------|------------------------|-----|------|------|
| LbrM28_V2.2000 | <i>L. braziliensis</i> | 48  | 1241 | 1288 |
| LbrM28_V2.2020 | <i>L. braziliensis</i> | 263 | 1    | 263  |
| LbrM28_V2.2020 | <i>L. braziliensis</i> | 126 | 277  | 402  |
| LbrM28_V2.2020 | <i>L. braziliensis</i> | 182 | 418  | 599  |
| LbrM28_V2.2030 | <i>L. braziliensis</i> | 83  | 54   | 136  |
| LbrM28_V2.2030 | <i>L. braziliensis</i> | 44  | 231  | 274  |
| LbrM28_V2.2030 | <i>L. braziliensis</i> | 44  | 231  | 274  |
| LbrM28_V2.2040 | <i>L. braziliensis</i> | 139 | 140  | 278  |
| LbrM28_V2.2040 | <i>L. braziliensis</i> | 54  | 328  | 381  |
| LbrM28_V2.2040 | <i>L. braziliensis</i> | 82  | 625  | 706  |
| LbrM28_V2.2050 | <i>L. braziliensis</i> | 56  | 1    | 56   |
| LbrM28_V2.2050 | <i>L. braziliensis</i> | 126 | 386  | 511  |
| LbrM28_V2.2050 | <i>L. braziliensis</i> | 283 | 538  | 820  |
| LbrM28_V2.2050 | <i>L. braziliensis</i> | 85  | 1172 | 1256 |
| LbrM28_V2.2060 | <i>L. braziliensis</i> | 41  | 77   | 117  |
| LbrM28_V2.2070 | <i>L. braziliensis</i> | 49  | 1    | 49   |
| LbrM28_V2.2070 | <i>L. braziliensis</i> | 300 | 146  | 445  |
| LbrM28_V2.2070 | <i>L. braziliensis</i> | 98  | 512  | 609  |
| LbrM28_V2.2080 | <i>L. braziliensis</i> | 80  | 1    | 80   |
| LbrM28_V2.2080 | <i>L. braziliensis</i> | 239 | 93   | 331  |
| LbrM28_V2.2080 | <i>L. braziliensis</i> | 55  | 541  | 595  |
| LbrM28_V2.2090 | <i>L. braziliensis</i> | 113 | 1    | 113  |
| LbrM28_V2.2100 | <i>L. braziliensis</i> | 155 | 17   | 171  |
| LbrM28_V2.2110 | <i>L. braziliensis</i> | 64  | 111  | 174  |
| LbrM28_V2.2120 | <i>L. braziliensis</i> | 56  | 1    | 56   |
| LbrM28_V2.2120 | <i>L. braziliensis</i> | 62  | 100  | 161  |
| LbrM28_V2.2120 | <i>L. braziliensis</i> | 42  | 195  | 236  |
| LbrM28_V2.2120 | <i>L. braziliensis</i> | 113 | 342  | 454  |
| LbrM28_V2.2140 | <i>L. braziliensis</i> | 185 | 360  | 544  |
| LbrM28_V2.2140 | <i>L. braziliensis</i> | 232 | 548  | 779  |
| LbrM28_V2.2160 | <i>L. braziliensis</i> | 65  | 213  | 277  |
| LbrM28_V2.2160 | <i>L. braziliensis</i> | 46  | 547  | 592  |
| LbrM28_V2.2160 | <i>L. braziliensis</i> | 46  | 547  | 592  |
| LbrM28_V2.2180 | <i>L. braziliensis</i> | 76  | 284  | 359  |
| LbrM28_V2.2180 | <i>L. braziliensis</i> | 106 | 384  | 489  |
| LbrM28_V2.2180 | <i>L. braziliensis</i> | 41  | 922  | 962  |
| LbrM28_V2.2180 | <i>L. braziliensis</i> | 98  | 1070 | 1167 |
| LbrM28_V2.2180 | <i>L. braziliensis</i> | 112 | 1242 | 1353 |
| LbrM28_V2.2190 | <i>L. braziliensis</i> | 214 | 292  | 505  |
| LbrM28_V2.2190 | <i>L. braziliensis</i> | 54  | 576  | 629  |
| LbrM28_V2.2190 | <i>L. braziliensis</i> | 206 | 660  | 865  |
| LbrM28_V2.2200 | <i>L. braziliensis</i> | 61  | 59   | 119  |
| LbrM28_V2.2200 | <i>L. braziliensis</i> | 50  | 398  | 447  |
| LbrM28_V2.2200 | <i>L. braziliensis</i> | 50  | 398  | 447  |
| LbrM28_V2.2210 | <i>L. braziliensis</i> | 208 | 27   | 234  |
| LbrM28_V2.2210 | <i>L. braziliensis</i> | 41  | 243  | 283  |
| LbrM28_V2.2210 | <i>L. braziliensis</i> | 197 | 335  | 531  |

|                |                        |     |      |      |
|----------------|------------------------|-----|------|------|
| LbrM28_V2.2240 | <i>L. braziliensis</i> | 54  | 149  | 202  |
| LbrM28_V2.2270 | <i>L. braziliensis</i> | 68  | 477  | 544  |
| LbrM28_V2.2310 | <i>L. braziliensis</i> | 55  | 305  | 359  |
| LbrM28_V2.2320 | <i>L. braziliensis</i> | 49  | 647  | 695  |
| LbrM28_V2.2340 | <i>L. braziliensis</i> | 43  | 449  | 491  |
| LbrM28_V2.2350 | <i>L. braziliensis</i> | 116 | 1    | 116  |
| LbrM28_V2.2350 | <i>L. braziliensis</i> | 66  | 516  | 581  |
| LbrM28_V2.2370 | <i>L. braziliensis</i> | 138 | 128  | 265  |
| LbrM28_V2.2370 | <i>L. braziliensis</i> | 121 | 473  | 593  |
| LbrM28_V2.2380 | <i>L. braziliensis</i> | 78  | 1    | 78   |
| LbrM28_V2.2390 | <i>L. braziliensis</i> | 106 | 1    | 106  |
| LbrM28_V2.2390 | <i>L. braziliensis</i> | 58  | 108  | 165  |
| LbrM28_V2.2390 | <i>L. braziliensis</i> | 45  | 174  | 218  |
| LbrM28_V2.2390 | <i>L. braziliensis</i> | 58  | 235  | 292  |
| LbrM28_V2.2390 | <i>L. braziliensis</i> | 94  | 323  | 416  |
| LbrM28_V2.2390 | <i>L. braziliensis</i> | 465 | 419  | 883  |
| LbrM28_V2.2400 | <i>L. braziliensis</i> | 41  | 1    | 41   |
| LbrM28_V2.2400 | <i>L. braziliensis</i> | 59  | 582  | 640  |
| LbrM28_V2.2400 | <i>L. braziliensis</i> | 59  | 582  | 640  |
| LbrM28_V2.2410 | <i>L. braziliensis</i> | 403 | 1    | 403  |
| LbrM28_V2.2430 | <i>L. braziliensis</i> | 75  | 1    | 75   |
| LbrM28_V2.2430 | <i>L. braziliensis</i> | 346 | 95   | 440  |
| LbrM28_V2.2430 | <i>L. braziliensis</i> | 60  | 464  | 523  |
| LbrM28_V2.2430 | <i>L. braziliensis</i> | 109 | 539  | 647  |
| LbrM28_V2.2440 | <i>L. braziliensis</i> | 51  | 87   | 137  |
| LbrM28_V2.2470 | <i>L. braziliensis</i> | 142 | 341  | 482  |
| LbrM28_V2.2480 | <i>L. braziliensis</i> | 44  | 378  | 421  |
| LbrM28_V2.2480 | <i>L. braziliensis</i> | 73  | 1027 | 1099 |
| LbrM28_V2.2480 | <i>L. braziliensis</i> | 327 | 1175 | 1501 |
| LbrM28_V2.2490 | <i>L. braziliensis</i> | 70  | 540  | 609  |
| LbrM28_V2.2490 | <i>L. braziliensis</i> | 44  | 751  | 794  |
| LbrM28_V2.2490 | <i>L. braziliensis</i> | 44  | 751  | 794  |
| LbrM28_V2.2500 | <i>L. braziliensis</i> | 69  | 1    | 69   |
| LbrM28_V2.2500 | <i>L. braziliensis</i> | 104 | 75   | 178  |
| LbrM28_V2.2500 | <i>L. braziliensis</i> | 116 | 213  | 328  |
| LbrM28_V2.2500 | <i>L. braziliensis</i> | 178 | 363  | 540  |
| LbrM28_V2.2500 | <i>L. braziliensis</i> | 43  | 566  | 608  |
| LbrM28_V2.2510 | <i>L. braziliensis</i> | 64  | 45   | 108  |
| LbrM28_V2.2520 | <i>L. braziliensis</i> | 46  | 1    | 46   |
| LbrM28_V2.2520 | <i>L. braziliensis</i> | 196 | 71   | 266  |
| LbrM28_V2.2520 | <i>L. braziliensis</i> | 284 | 306  | 589  |
| LbrM28_V2.2520 | <i>L. braziliensis</i> | 153 | 608  | 760  |
| LbrM28_V2.2520 | <i>L. braziliensis</i> | 151 | 781  | 931  |
| LbrM28_V2.2530 | <i>L. braziliensis</i> | 95  | 53   | 147  |
| LbrM28_V2.2530 | <i>L. braziliensis</i> | 59  | 251  | 309  |
| LbrM28_V2.2530 | <i>L. braziliensis</i> | 84  | 362  | 445  |
| LbrM28_V2.2530 | <i>L. braziliensis</i> | 42  | 463  | 504  |

|                |                        |     |      |      |
|----------------|------------------------|-----|------|------|
| LbrM28_V2.2530 | <i>L. braziliensis</i> | 45  | 621  | 665  |
| LbrM28_V2.2540 | <i>L. braziliensis</i> | 72  | 215  | 286  |
| LbrM28_V2.2570 | <i>L. braziliensis</i> | 64  | 734  | 797  |
| LbrM28_V2.2580 | <i>L. braziliensis</i> | 92  | 695  | 786  |
| LbrM28_V2.2590 | <i>L. braziliensis</i> | 439 | 114  | 552  |
| LbrM28_V2.2590 | <i>L. braziliensis</i> | 45  | 561  | 605  |
| LbrM28_V2.2590 | <i>L. braziliensis</i> | 118 | 608  | 725  |
| LbrM28_V2.2590 | <i>L. braziliensis</i> | 599 | 741  | 1339 |
| LbrM28_V2.2610 | <i>L. braziliensis</i> | 46  | 73   | 118  |
| LbrM28_V2.2620 | <i>L. braziliensis</i> | 91  | 90   | 180  |
| LbrM28_V2.2640 | <i>L. braziliensis</i> | 51  | 281  | 331  |
| LbrM28_V2.2640 | <i>L. braziliensis</i> | 58  | 507  | 564  |
| LbrM28_V2.2640 | <i>L. braziliensis</i> | 58  | 507  | 564  |
| LbrM28_V2.2650 | <i>L. braziliensis</i> | 41  | 359  | 399  |
| LbrM28_V2.2680 | <i>L. braziliensis</i> | 54  | 49   | 102  |
| LbrM28_V2.2680 | <i>L. braziliensis</i> | 81  | 130  | 210  |
| LbrM28_V2.2680 | <i>L. braziliensis</i> | 81  | 130  | 210  |
| LbrM28_V2.2690 | <i>L. braziliensis</i> | 84  | 14   | 97   |
| LbrM28_V2.2690 | <i>L. braziliensis</i> | 273 | 165  | 437  |
| LbrM28_V2.2700 | <i>L. braziliensis</i> | 112 | 1    | 112  |
| LbrM28_V2.2720 | <i>L. braziliensis</i> | 93  | 1    | 93   |
| LbrM28_V2.2720 | <i>L. braziliensis</i> | 98  | 221  | 318  |
| LbrM28_V2.2720 | <i>L. braziliensis</i> | 91  | 364  | 454  |
| LbrM28_V2.2730 | <i>L. braziliensis</i> | 73  | 67   | 139  |
| LbrM28_V2.2730 | <i>L. braziliensis</i> | 50  | 450  | 499  |
| LbrM28_V2.2730 | <i>L. braziliensis</i> | 64  | 514  | 577  |
| LbrM28_V2.2740 | <i>L. braziliensis</i> | 70  | 22   | 91   |
| LbrM28_V2.2740 | <i>L. braziliensis</i> | 213 | 93   | 305  |
| LbrM28_V2.2740 | <i>L. braziliensis</i> | 307 | 326  | 632  |
| LbrM28_V2.2740 | <i>L. braziliensis</i> | 47  | 893  | 939  |
| LbrM28_V2.2740 | <i>L. braziliensis</i> | 44  | 1127 | 1170 |
| LbrM28_V2.2750 | <i>L. braziliensis</i> | 55  | 272  | 326  |
| LbrM28_V2.2750 | <i>L. braziliensis</i> | 69  | 375  | 443  |
| LbrM28_V2.2750 | <i>L. braziliensis</i> | 96  | 883  | 978  |
| LbrM28_V2.2760 | <i>L. braziliensis</i> | 75  | 69   | 143  |
| LbrM28_V2.2770 | <i>L. braziliensis</i> | 75  | 69   | 143  |
| LbrM28_V2.2780 | <i>L. braziliensis</i> | 177 | 1    | 177  |
| LbrM28_V2.2790 | <i>L. braziliensis</i> | 121 | 1    | 121  |
| LbrM28_V2.2800 | <i>L. braziliensis</i> | 66  | 128  | 193  |
| LbrM28_V2.2800 | <i>L. braziliensis</i> | 171 | 335  | 505  |
| LbrM28_V2.2800 | <i>L. braziliensis</i> | 61  | 572  | 632  |
| LbrM28_V2.2800 | <i>L. braziliensis</i> | 137 | 667  | 803  |
| LbrM28_V2.2800 | <i>L. braziliensis</i> | 66  | 805  | 870  |
| LbrM28_V2.2810 | <i>L. braziliensis</i> | 75  | 51   | 125  |
| LbrM28_V2.2810 | <i>L. braziliensis</i> | 49  | 277  | 325  |
| LbrM28_V2.2810 | <i>L. braziliensis</i> | 49  | 277  | 325  |
| LbrM28_V2.2820 | <i>L. braziliensis</i> | 192 | 36   | 227  |



|                |                        |     |      |      |
|----------------|------------------------|-----|------|------|
| LbrM28_V2.2820 | <i>L. braziliensis</i> | 67  | 333  | 399  |
| LbrM28_V2.2820 | <i>L. braziliensis</i> | 48  | 544  | 591  |
| LbrM28_V2.2820 | <i>L. braziliensis</i> | 59  | 748  | 806  |
| LbrM28_V2.2820 | <i>L. braziliensis</i> | 63  | 837  | 899  |
| LbrM28_V2.2820 | <i>L. braziliensis</i> | 61  | 1206 | 1266 |
| LbrM28_V2.2820 | <i>L. braziliensis</i> | 217 | 1493 | 1709 |
| LbrM28_V2.2840 | <i>L. braziliensis</i> | 288 | 1    | 288  |
| LbrM28_V2.2840 | <i>L. braziliensis</i> | 64  | 294  | 357  |
| LbrM28_V2.2850 | <i>L. braziliensis</i> | 43  | 68   | 110  |
| LbrM28_V2.2850 | <i>L. braziliensis</i> | 582 | 171  | 752  |
| LbrM28_V2.2900 | <i>L. braziliensis</i> | 47  | 92   | 138  |
| LbrM28_V2.2900 | <i>L. braziliensis</i> | 48  | 220  | 267  |
| LbrM28_V2.2900 | <i>L. braziliensis</i> | 42  | 353  | 394  |
| LbrM28_V2.2910 | <i>L. braziliensis</i> | 256 | 117  | 372  |
| LbrM28_V2.2940 | <i>L. braziliensis</i> | 47  | 125  | 171  |
| LbrM28_V2.2940 | <i>L. braziliensis</i> | 50  | 277  | 326  |
| LbrM28_V2.2940 | <i>L. braziliensis</i> | 103 | 500  | 602  |
| LbrM28_V2.2990 | <i>L. braziliensis</i> | 161 | 494  | 654  |
| LbrM28_V2.3000 | <i>L. braziliensis</i> | 86  | 30   | 115  |
| LbrM28_V2.3010 | <i>L. braziliensis</i> | 46  | 1    | 46   |
| LbrM28_V2.3010 | <i>L. braziliensis</i> | 44  | 455  | 498  |
| LbrM28_V2.3010 | <i>L. braziliensis</i> | 44  | 455  | 498  |
| LbrM28_V2.3020 | <i>L. braziliensis</i> | 94  | 1    | 94   |
| LbrM28_V2.3030 | <i>L. braziliensis</i> | 63  | 524  | 586  |
| LbrM28_V2.3030 | <i>L. braziliensis</i> | 62  | 600  | 661  |
| LbrM28_V2.3040 | <i>L. braziliensis</i> | 42  | 45   | 86   |
| LbrM28_V2.3040 | <i>L. braziliensis</i> | 125 | 514  | 638  |
| LbrM28_V2.3040 | <i>L. braziliensis</i> | 78  | 701  | 778  |
| LbrM28_V2.3050 | <i>L. braziliensis</i> | 108 | 123  | 230  |
| LbrM28_V2.3050 | <i>L. braziliensis</i> | 115 | 315  | 429  |
| LbrM28_V2.3060 | <i>L. braziliensis</i> | 57  | 1    | 57   |
| LbrM28_V2.3060 | <i>L. braziliensis</i> | 53  | 322  | 374  |
| LbrM28_V2.3060 | <i>L. braziliensis</i> | 53  | 322  | 374  |
| LbrM28_V2.3090 | <i>L. braziliensis</i> | 129 | 73   | 201  |
| LbrM28_V2.3090 | <i>L. braziliensis</i> | 67  | 773  | 839  |
| LbrM28_V2.3090 | <i>L. braziliensis</i> | 122 | 2737 | 2858 |
| LbrM28_V2.3090 | <i>L. braziliensis</i> | 73  | 2970 | 3042 |
| LbrM28_V2.3090 | <i>L. braziliensis</i> | 83  | 3286 | 3368 |
| LbrM28_V2.3090 | <i>L. braziliensis</i> | 49  | 3933 | 3981 |
| LbrM28_V2.3100 | <i>L. braziliensis</i> | 58  | 356  | 413  |
| LbrM28_V2.3110 | <i>L. braziliensis</i> | 54  | 478  | 531  |
| LbrM28_V2.3140 | <i>L. braziliensis</i> | 67  | 63   | 129  |
| LbrM28_V2.3160 | <i>L. braziliensis</i> | 110 | 223  | 332  |
| LbrM28_V2.3190 | <i>L. braziliensis</i> | 82  | 1    | 82   |
| LbrM28_V2.3210 | <i>L. braziliensis</i> | 211 | 25   | 235  |
| LbrM28_V2.3250 | <i>L. braziliensis</i> | 119 | 251  | 369  |
| LbrM28_V2.3260 | <i>L. braziliensis</i> | 226 | 1    | 226  |

|                |                        |     |      |      |
|----------------|------------------------|-----|------|------|
| LbrM28_V2.3260 | <i>L. braziliensis</i> | 74  | 357  | 430  |
| LbrM28_V2.3260 | <i>L. braziliensis</i> | 517 | 480  | 996  |
| LbrM29_V2.0010 | <i>L. braziliensis</i> | 45  | 40   | 84   |
| LbrM29_V2.0010 | <i>L. braziliensis</i> | 48  | 101  | 148  |
| LbrM29_V2.0010 | <i>L. braziliensis</i> | 119 | 256  | 374  |
| LbrM29_V2.0010 | <i>L. braziliensis</i> | 172 | 614  | 785  |
| LbrM29_V2.0030 | <i>L. braziliensis</i> | 70  | 436  | 505  |
| LbrM29_V2.0030 | <i>L. braziliensis</i> | 41  | 624  | 664  |
| LbrM29_V2.0030 | <i>L. braziliensis</i> | 51  | 738  | 788  |
| LbrM29_V2.0030 | <i>L. braziliensis</i> | 143 | 906  | 1048 |
| LbrM29_V2.0040 | <i>L. braziliensis</i> | 76  | 392  | 467  |
| LbrM29_V2.0050 | <i>L. braziliensis</i> | 51  | 37   | 87   |
| LbrM29_V2.0060 | <i>L. braziliensis</i> | 40  | 595  | 634  |
| LbrM29_V2.0070 | <i>L. braziliensis</i> | 46  | 338  | 383  |
| LbrM29_V2.0080 | <i>L. braziliensis</i> | 44  | 18   | 61   |
| LbrM29_V2.0080 | <i>L. braziliensis</i> | 72  | 103  | 174  |
| LbrM29_V2.0080 | <i>L. braziliensis</i> | 72  | 103  | 174  |
| LbrM29_V2.0110 | <i>L. braziliensis</i> | 71  | 1    | 71   |
| LbrM29_V2.0110 | <i>L. braziliensis</i> | 46  | 373  | 418  |
| LbrM29_V2.0110 | <i>L. braziliensis</i> | 46  | 373  | 418  |
| LbrM29_V2.0120 | <i>L. braziliensis</i> | 903 | 1    | 903  |
| LbrM29_V2.0120 | <i>L. braziliensis</i> | 41  | 1707 | 1747 |
| LbrM29_V2.0120 | <i>L. braziliensis</i> | 74  | 2195 | 2268 |
| LbrM29_V2.0130 | <i>L. braziliensis</i> | 51  | 1    | 51   |
| LbrM29_V2.0130 | <i>L. braziliensis</i> | 45  | 73   | 117  |
| LbrM29_V2.0130 | <i>L. braziliensis</i> | 40  | 603  | 642  |
| LbrM29_V2.0140 | <i>L. braziliensis</i> | 47  | 1    | 47   |
| LbrM29_V2.0140 | <i>L. braziliensis</i> | 59  | 50   | 108  |
| LbrM29_V2.0160 | <i>L. braziliensis</i> | 42  | 1    | 42   |
| LbrM29_V2.0160 | <i>L. braziliensis</i> | 40  | 294  | 333  |
| LbrM29_V2.0160 | <i>L. braziliensis</i> | 40  | 294  | 333  |
| LbrM29_V2.0170 | <i>L. braziliensis</i> | 40  | 474  | 513  |
| LbrM29_V2.0180 | <i>L. braziliensis</i> | 49  | 1    | 49   |
| LbrM29_V2.0180 | <i>L. braziliensis</i> | 75  | 63   | 137  |
| LbrM29_V2.0190 | <i>L. braziliensis</i> | 140 | 1    | 140  |
| LbrM29_V2.0190 | <i>L. braziliensis</i> | 60  | 237  | 296  |
| LbrM29_V2.0190 | <i>L. braziliensis</i> | 153 | 328  | 480  |
| LbrM29_V2.0200 | <i>L. braziliensis</i> | 404 | 1    | 404  |
| LbrM29_V2.0200 | <i>L. braziliensis</i> | 45  | 418  | 462  |
| LbrM29_V2.0200 | <i>L. braziliensis</i> | 114 | 493  | 606  |
| LbrM29_V2.0200 | <i>L. braziliensis</i> | 68  | 837  | 904  |
| LbrM29_V2.0200 | <i>L. braziliensis</i> | 74  | 954  | 1027 |
| LbrM29_V2.0210 | <i>L. braziliensis</i> | 44  | 438  | 481  |
| LbrM29_V2.0210 | <i>L. braziliensis</i> | 50  | 1042 | 1091 |
| LbrM29_V2.0210 | <i>L. braziliensis</i> | 190 | 1322 | 1511 |
| LbrM29_V2.0230 | <i>L. braziliensis</i> | 219 | 1    | 219  |
| LbrM29_V2.0240 | <i>L. braziliensis</i> | 42  | 1    | 42   |

|                |                        |     |      |      |
|----------------|------------------------|-----|------|------|
| LbrM29_V2.0240 | <i>L. braziliensis</i> | 46  | 170  | 215  |
| LbrM29_V2.0240 | <i>L. braziliensis</i> | 46  | 170  | 215  |
| LbrM29_V2.0250 | <i>L. braziliensis</i> | 50  | 94   | 143  |
| LbrM29_V2.0250 | <i>L. braziliensis</i> | 96  | 443  | 538  |
| LbrM29_V2.0260 | <i>L. braziliensis</i> | 62  | 50   | 111  |
| LbrM29_V2.0260 | <i>L. braziliensis</i> | 176 | 210  | 385  |
| LbrM29_V2.0270 | <i>L. braziliensis</i> | 56  | 1    | 56   |
| LbrM29_V2.0270 | <i>L. braziliensis</i> | 60  | 224  | 283  |
| LbrM29_V2.0270 | <i>L. braziliensis</i> | 64  | 313  | 376  |
| LbrM29_V2.0280 | <i>L. braziliensis</i> | 65  | 42   | 106  |
| LbrM29_V2.0280 | <i>L. braziliensis</i> | 96  | 239  | 334  |
| LbrM29_V2.0290 | <i>L. braziliensis</i> | 110 | 28   | 137  |
| LbrM29_V2.0290 | <i>L. braziliensis</i> | 47  | 139  | 185  |
| LbrM29_V2.0290 | <i>L. braziliensis</i> | 72  | 292  | 363  |
| LbrM29_V2.0290 | <i>L. braziliensis</i> | 116 | 775  | 890  |
| LbrM29_V2.0290 | <i>L. braziliensis</i> | 45  | 995  | 1039 |
| LbrM29_V2.0290 | <i>L. braziliensis</i> | 67  | 1236 | 1302 |
| LbrM29_V2.0310 | <i>L. braziliensis</i> | 150 | 30   | 179  |
| LbrM29_V2.0310 | <i>L. braziliensis</i> | 93  | 249  | 341  |
| LbrM29_V2.0310 | <i>L. braziliensis</i> | 81  | 385  | 465  |
| LbrM29_V2.0310 | <i>L. braziliensis</i> | 106 | 501  | 606  |
| LbrM29_V2.0310 | <i>L. braziliensis</i> | 367 | 895  | 1261 |
| LbrM29_V2.0310 | <i>L. braziliensis</i> | 66  | 1277 | 1342 |
| LbrM29_V2.0310 | <i>L. braziliensis</i> | 72  | 1364 | 1435 |
| LbrM29_V2.0320 | <i>L. braziliensis</i> | 250 | 58   | 307  |
| LbrM29_V2.0320 | <i>L. braziliensis</i> | 123 | 335  | 457  |
| LbrM29_V2.0320 | <i>L. braziliensis</i> | 109 | 505  | 613  |
| LbrM29_V2.0330 | <i>L. braziliensis</i> | 62  | 199  | 260  |
| LbrM29_V2.0350 | <i>L. braziliensis</i> | 54  | 27   | 80   |
| LbrM29_V2.0350 | <i>L. braziliensis</i> | 119 | 115  | 233  |
| LbrM29_V2.0350 | <i>L. braziliensis</i> | 302 | 239  | 540  |
| LbrM29_V2.0360 | <i>L. braziliensis</i> | 57  | 96   | 152  |
| LbrM29_V2.0360 | <i>L. braziliensis</i> | 115 | 178  | 292  |
| LbrM29_V2.0370 | <i>L. braziliensis</i> | 54  | 412  | 465  |
| LbrM29_V2.0370 | <i>L. braziliensis</i> | 44  | 521  | 564  |
| LbrM29_V2.0370 | <i>L. braziliensis</i> | 44  | 521  | 564  |
| LbrM29_V2.0390 | <i>L. braziliensis</i> | 197 | 1    | 197  |
| LbrM29_V2.0390 | <i>L. braziliensis</i> | 41  | 553  | 593  |
| LbrM29_V2.0390 | <i>L. braziliensis</i> | 41  | 553  | 593  |
| LbrM29_V2.0400 | <i>L. braziliensis</i> | 53  | 1    | 53   |
| LbrM29_V2.0400 | <i>L. braziliensis</i> | 149 | 80   | 228  |
| LbrM29_V2.0400 | <i>L. braziliensis</i> | 117 | 268  | 384  |
| LbrM29_V2.0400 | <i>L. braziliensis</i> | 61  | 416  | 476  |
| LbrM29_V2.0400 | <i>L. braziliensis</i> | 176 | 478  | 653  |
| LbrM29_V2.0400 | <i>L. braziliensis</i> | 50  | 659  | 708  |
| LbrM29_V2.0410 | <i>L. braziliensis</i> | 203 | 208  | 410  |
| LbrM29_V2.0420 | <i>L. braziliensis</i> | 128 | 1    | 128  |

|                |                        |     |      |      |
|----------------|------------------------|-----|------|------|
| LbrM29_V2.0420 | <i>L. braziliensis</i> | 53  | 132  | 184  |
| LbrM29_V2.0420 | <i>L. braziliensis</i> | 53  | 132  | 184  |
| LbrM29_V2.0440 | <i>L. braziliensis</i> | 307 | 149  | 455  |
| LbrM29_V2.0460 | <i>L. braziliensis</i> | 54  | 41   | 94   |
| LbrM29_V2.0460 | <i>L. braziliensis</i> | 66  | 157  | 222  |
| LbrM29_V2.0460 | <i>L. braziliensis</i> | 66  | 157  | 222  |
| LbrM29_V2.0470 | <i>L. braziliensis</i> | 174 | 1    | 174  |
| LbrM29_V2.0470 | <i>L. braziliensis</i> | 224 | 192  | 415  |
| LbrM29_V2.0470 | <i>L. braziliensis</i> | 74  | 473  | 546  |
| LbrM29_V2.0470 | <i>L. braziliensis</i> | 81  | 573  | 653  |
| LbrM29_V2.0470 | <i>L. braziliensis</i> | 430 | 669  | 1098 |
| LbrM29_V2.0470 | <i>L. braziliensis</i> | 47  | 1121 | 1167 |
| LbrM29_V2.0470 | <i>L. braziliensis</i> | 131 | 1235 | 1365 |
| LbrM29_V2.0470 | <i>L. braziliensis</i> | 100 | 1371 | 1470 |
| LbrM29_V2.0470 | <i>L. braziliensis</i> | 327 | 1500 | 1826 |
| LbrM29_V2.0470 | <i>L. braziliensis</i> | 610 | 1859 | 2468 |
| LbrM29_V2.0470 | <i>L. braziliensis</i> | 53  | 2479 | 2531 |
| LbrM29_V2.0470 | <i>L. braziliensis</i> | 108 | 2666 | 2773 |
| LbrM29_V2.0470 | <i>L. braziliensis</i> | 69  | 2790 | 2858 |
| LbrM29_V2.0480 | <i>L. braziliensis</i> | 213 | 1    | 213  |
| LbrM29_V2.0490 | <i>L. braziliensis</i> | 159 | 1    | 159  |
| LbrM29_V2.0490 | <i>L. braziliensis</i> | 77  | 185  | 261  |
| LbrM29_V2.0490 | <i>L. braziliensis</i> | 337 | 283  | 619  |
| LbrM29_V2.0490 | <i>L. braziliensis</i> | 46  | 836  | 881  |
| LbrM29_V2.0500 | <i>L. braziliensis</i> | 43  | 235  | 277  |
| LbrM29_V2.0530 | <i>L. braziliensis</i> | 203 | 46   | 248  |
| LbrM29_V2.0540 | <i>L. braziliensis</i> | 67  | 176  | 242  |
| LbrM29_V2.0550 | <i>L. braziliensis</i> | 48  | 61   | 108  |
| LbrM29_V2.0550 | <i>L. braziliensis</i> | 56  | 141  | 196  |
| LbrM29_V2.0550 | <i>L. braziliensis</i> | 116 | 269  | 384  |
| LbrM29_V2.0570 | <i>L. braziliensis</i> | 66  | 1    | 66   |
| LbrM29_V2.0580 | <i>L. braziliensis</i> | 53  | 525  | 577  |
| LbrM29_V2.0590 | <i>L. braziliensis</i> | 53  | 1    | 53   |
| LbrM29_V2.0590 | <i>L. braziliensis</i> | 64  | 71   | 134  |
| LbrM29_V2.0590 | <i>L. braziliensis</i> | 46  | 179  | 224  |
| LbrM29_V2.0590 | <i>L. braziliensis</i> | 80  | 251  | 330  |
| LbrM29_V2.0590 | <i>L. braziliensis</i> | 129 | 352  | 480  |
| LbrM29_V2.0600 | <i>L. braziliensis</i> | 143 | 144  | 286  |
| LbrM29_V2.0600 | <i>L. braziliensis</i> | 54  | 699  | 752  |
| LbrM29_V2.0600 | <i>L. braziliensis</i> | 41  | 1003 | 1043 |
| LbrM29_V2.0600 | <i>L. braziliensis</i> | 40  | 1049 | 1088 |
| LbrM29_V2.0610 | <i>L. braziliensis</i> | 53  | 104  | 156  |
| LbrM29_V2.0610 | <i>L. braziliensis</i> | 188 | 158  | 345  |
| LbrM29_V2.0610 | <i>L. braziliensis</i> | 219 | 360  | 578  |
| LbrM29_V2.0620 | <i>L. braziliensis</i> | 63  | 53   | 115  |
| LbrM29_V2.0620 | <i>L. braziliensis</i> | 175 | 221  | 395  |
| LbrM29_V2.0620 | <i>L. braziliensis</i> | 169 | 439  | 607  |

|                |                        |     |      |      |
|----------------|------------------------|-----|------|------|
| LbrM29_V2.0630 | <i>L. braziliensis</i> | 49  | 591  | 639  |
| LbrM29_V2.0640 | <i>L. braziliensis</i> | 85  | 1    | 85   |
| LbrM29_V2.0650 | <i>L. braziliensis</i> | 85  | 1    | 85   |
| LbrM29_V2.0660 | <i>L. braziliensis</i> | 187 | 291  | 477  |
| LbrM29_V2.0670 | <i>L. braziliensis</i> | 130 | 1    | 130  |
| LbrM29_V2.0670 | <i>L. braziliensis</i> | 61  | 194  | 254  |
| LbrM29_V2.0670 | <i>L. braziliensis</i> | 52  | 333  | 384  |
| LbrM29_V2.0670 | <i>L. braziliensis</i> | 51  | 413  | 463  |
| LbrM29_V2.0690 | <i>L. braziliensis</i> | 195 | 1    | 195  |
| LbrM29_V2.0690 | <i>L. braziliensis</i> | 79  | 382  | 460  |
| LbrM29_V2.0690 | <i>L. braziliensis</i> | 173 | 567  | 739  |
| LbrM29_V2.0710 | <i>L. braziliensis</i> | 108 | 69   | 176  |
| LbrM29_V2.0710 | <i>L. braziliensis</i> | 56  | 207  | 262  |
| LbrM29_V2.0710 | <i>L. braziliensis</i> | 49  | 363  | 411  |
| LbrM29_V2.0710 | <i>L. braziliensis</i> | 43  | 539  | 581  |
| LbrM29_V2.0710 | <i>L. braziliensis</i> | 92  | 615  | 706  |
| LbrM29_V2.0720 | <i>L. braziliensis</i> | 49  | 353  | 401  |
| LbrM29_V2.0720 | <i>L. braziliensis</i> | 44  | 460  | 503  |
| LbrM29_V2.0720 | <i>L. braziliensis</i> | 59  | 677  | 735  |
| LbrM29_V2.0720 | <i>L. braziliensis</i> | 43  | 816  | 858  |
| LbrM29_V2.0750 | <i>L. braziliensis</i> | 175 | 1    | 175  |
| LbrM29_V2.0760 | <i>L. braziliensis</i> | 49  | 325  | 373  |
| LbrM29_V2.0770 | <i>L. braziliensis</i> | 62  | 1    | 62   |
| LbrM29_V2.0770 | <i>L. braziliensis</i> | 329 | 118  | 446  |
| LbrM29_V2.0770 | <i>L. braziliensis</i> | 50  | 508  | 557  |
| LbrM29_V2.0770 | <i>L. braziliensis</i> | 53  | 630  | 682  |
| LbrM29_V2.0780 | <i>L. braziliensis</i> | 69  | 80   | 148  |
| LbrM29_V2.0780 | <i>L. braziliensis</i> | 40  | 248  | 287  |
| LbrM29_V2.0780 | <i>L. braziliensis</i> | 65  | 723  | 787  |
| LbrM29_V2.0790 | <i>L. braziliensis</i> | 104 | 1    | 104  |
| LbrM29_V2.0790 | <i>L. braziliensis</i> | 40  | 146  | 185  |
| LbrM29_V2.0790 | <i>L. braziliensis</i> | 40  | 146  | 185  |
| LbrM29_V2.0800 | <i>L. braziliensis</i> | 46  | 473  | 518  |
| LbrM29_V2.0810 | <i>L. braziliensis</i> | 125 | 36   | 160  |
| LbrM29_V2.0810 | <i>L. braziliensis</i> | 89  | 433  | 521  |
| LbrM29_V2.0810 | <i>L. braziliensis</i> | 122 | 707  | 828  |
| LbrM29_V2.0810 | <i>L. braziliensis</i> | 74  | 883  | 956  |
| LbrM29_V2.0810 | <i>L. braziliensis</i> | 59  | 1421 | 1479 |
| LbrM29_V2.0810 | <i>L. braziliensis</i> | 66  | 1505 | 1570 |
| LbrM29_V2.0820 | <i>L. braziliensis</i> | 155 | 1    | 155  |
| LbrM29_V2.0820 | <i>L. braziliensis</i> | 47  | 207  | 253  |
| LbrM29_V2.0820 | <i>L. braziliensis</i> | 219 | 434  | 652  |
| LbrM29_V2.0830 | <i>L. braziliensis</i> | 408 | 44   | 451  |
| LbrM29_V2.0830 | <i>L. braziliensis</i> | 56  | 506  | 561  |
| LbrM29_V2.0840 | <i>L. braziliensis</i> | 70  | 88   | 157  |
| LbrM29_V2.0840 | <i>L. braziliensis</i> | 340 | 277  | 616  |
| LbrM29_V2.0850 | <i>L. braziliensis</i> | 45  | 198  | 242  |

|                |                        |     |      |      |
|----------------|------------------------|-----|------|------|
| LbrM29_V2.0860 | <i>L. braziliensis</i> | 151 | 1    | 151  |
| LbrM29_V2.0860 | <i>L. braziliensis</i> | 103 | 325  | 427  |
| LbrM29_V2.0880 | <i>L. braziliensis</i> | 89  | 57   | 145  |
| LbrM29_V2.0880 | <i>L. braziliensis</i> | 64  | 147  | 210  |
| LbrM29_V2.0880 | <i>L. braziliensis</i> | 87  | 213  | 299  |
| LbrM29_V2.0890 | <i>L. braziliensis</i> | 76  | 1    | 76   |
| LbrM29_V2.0890 | <i>L. braziliensis</i> | 69  | 174  | 242  |
| LbrM29_V2.0890 | <i>L. braziliensis</i> | 72  | 289  | 360  |
| LbrM29_V2.0890 | <i>L. braziliensis</i> | 92  | 423  | 514  |
| LbrM29_V2.0920 | <i>L. braziliensis</i> | 67  | 93   | 159  |
| LbrM29_V2.0960 | <i>L. braziliensis</i> | 61  | 391  | 451  |
| LbrM29_V2.0970 | <i>L. braziliensis</i> | 87  | 129  | 215  |
| LbrM29_V2.0980 | <i>L. braziliensis</i> | 50  | 257  | 306  |
| LbrM29_V2.0990 | <i>L. braziliensis</i> | 56  | 337  | 392  |
| LbrM29_V2.0990 | <i>L. braziliensis</i> | 40  | 465  | 504  |
| LbrM29_V2.0990 | <i>L. braziliensis</i> | 40  | 465  | 504  |
| LbrM29_V2.1000 | <i>L. braziliensis</i> | 41  | 1    | 41   |
| LbrM29_V2.1000 | <i>L. braziliensis</i> | 74  | 319  | 392  |
| LbrM29_V2.1000 | <i>L. braziliensis</i> | 74  | 319  | 392  |
| LbrM29_V2.1010 | <i>L. braziliensis</i> | 158 | 1    | 158  |
| LbrM29_V2.1030 | <i>L. braziliensis</i> | 95  | 40   | 134  |
| LbrM29_V2.1040 | <i>L. braziliensis</i> | 59  | 1    | 59   |
| LbrM29_V2.1040 | <i>L. braziliensis</i> | 132 | 122  | 253  |
| LbrM29_V2.1040 | <i>L. braziliensis</i> | 93  | 267  | 359  |
| LbrM29_V2.1040 | <i>L. braziliensis</i> | 50  | 367  | 416  |
| LbrM29_V2.1050 | <i>L. braziliensis</i> | 604 | 340  | 943  |
| LbrM29_V2.1050 | <i>L. braziliensis</i> | 290 | 1006 | 1295 |
| LbrM29_V2.1050 | <i>L. braziliensis</i> | 221 | 1313 | 1533 |
| LbrM29_V2.1060 | <i>L. braziliensis</i> | 252 | 1    | 252  |
| LbrM29_V2.1060 | <i>L. braziliensis</i> | 68  | 291  | 358  |
| LbrM29_V2.1060 | <i>L. braziliensis</i> | 141 | 369  | 509  |
| LbrM29_V2.1070 | <i>L. braziliensis</i> | 126 | 195  | 320  |
| LbrM29_V2.1070 | <i>L. braziliensis</i> | 92  | 326  | 417  |
| LbrM29_V2.1070 | <i>L. braziliensis</i> | 238 | 445  | 682  |
| LbrM29_V2.1070 | <i>L. braziliensis</i> | 50  | 749  | 798  |
| LbrM29_V2.1070 | <i>L. braziliensis</i> | 91  | 883  | 973  |
| LbrM29_V2.1080 | <i>L. braziliensis</i> | 107 | 53   | 159  |
| LbrM29_V2.1080 | <i>L. braziliensis</i> | 136 | 172  | 307  |
| LbrM29_V2.1080 | <i>L. braziliensis</i> | 264 | 354  | 617  |
| LbrM29_V2.1100 | <i>L. braziliensis</i> | 91  | 14   | 104  |
| LbrM29_V2.1100 | <i>L. braziliensis</i> | 199 | 206  | 404  |
| LbrM29_V2.1100 | <i>L. braziliensis</i> | 43  | 629  | 671  |
| LbrM29_V2.1110 | <i>L. braziliensis</i> | 147 | 1    | 147  |
| LbrM29_V2.1120 | <i>L. braziliensis</i> | 51  | 1    | 51   |
| LbrM29_V2.1120 | <i>L. braziliensis</i> | 53  | 259  | 311  |
| LbrM29_V2.1120 | <i>L. braziliensis</i> | 49  | 478  | 526  |
| LbrM29_V2.1120 | <i>L. braziliensis</i> | 147 | 838  | 984  |

|                |                        |     |      |      |
|----------------|------------------------|-----|------|------|
| LbrM29_V2.1120 | <i>L. braziliensis</i> | 50  | 1139 | 1188 |
| LbrM29_V2.1120 | <i>L. braziliensis</i> | 93  | 1195 | 1287 |
| LbrM29_V2.1120 | <i>L. braziliensis</i> | 142 | 1320 | 1461 |
| LbrM29_V2.1120 | <i>L. braziliensis</i> | 65  | 1544 | 1608 |
| LbrM29_V2.1120 | <i>L. braziliensis</i> | 46  | 1635 | 1680 |
| LbrM29_V2.1120 | <i>L. braziliensis</i> | 63  | 1843 | 1905 |
| LbrM29_V2.1130 | <i>L. braziliensis</i> | 61  | 58   | 118  |
| LbrM29_V2.1130 | <i>L. braziliensis</i> | 56  | 177  | 232  |
| LbrM29_V2.1130 | <i>L. braziliensis</i> | 145 | 301  | 445  |
| LbrM29_V2.1130 | <i>L. braziliensis</i> | 55  | 536  | 590  |
| LbrM29_V2.1140 | <i>L. braziliensis</i> | 51  | 1    | 51   |
| LbrM29_V2.1140 | <i>L. braziliensis</i> | 85  | 60   | 144  |
| LbrM29_V2.1140 | <i>L. braziliensis</i> | 62  | 195  | 256  |
| LbrM29_V2.1140 | <i>L. braziliensis</i> | 77  | 367  | 443  |
| LbrM29_V2.1140 | <i>L. braziliensis</i> | 100 | 464  | 563  |
| LbrM29_V2.1140 | <i>L. braziliensis</i> | 193 | 571  | 763  |
| LbrM29_V2.1140 | <i>L. braziliensis</i> | 138 | 801  | 938  |
| LbrM29_V2.1150 | <i>L. braziliensis</i> | 88  | 286  | 373  |
| LbrM29_V2.1160 | <i>L. braziliensis</i> | 53  | 308  | 360  |
| LbrM29_V2.1170 | <i>L. braziliensis</i> | 64  | 113  | 176  |
| LbrM29_V2.1170 | <i>L. braziliensis</i> | 47  | 579  | 625  |
| LbrM29_V2.1180 | <i>L. braziliensis</i> | 88  | 286  | 373  |
| LbrM29_V2.1200 | <i>L. braziliensis</i> | 103 | 82   | 184  |
| LbrM29_V2.1200 | <i>L. braziliensis</i> | 57  | 245  | 301  |
| LbrM29_V2.1210 | <i>L. braziliensis</i> | 96  | 79   | 174  |
| LbrM29_V2.1250 | <i>L. braziliensis</i> | 182 | 104  | 285  |
| LbrM29_V2.1260 | <i>L. braziliensis</i> | 41  | 48   | 88   |
| LbrM29_V2.1260 | <i>L. braziliensis</i> | 120 | 95   | 214  |
| LbrM29_V2.1260 | <i>L. braziliensis</i> | 128 | 251  | 378  |
| LbrM29_V2.1260 | <i>L. braziliensis</i> | 152 | 455  | 606  |
| LbrM29_V2.1260 | <i>L. braziliensis</i> | 299 | 717  | 1015 |
| LbrM29_V2.1260 | <i>L. braziliensis</i> | 44  | 1048 | 1091 |
| LbrM29_V2.1260 | <i>L. braziliensis</i> | 202 | 1104 | 1305 |
| LbrM29_V2.1260 | <i>L. braziliensis</i> | 96  | 1350 | 1445 |
| LbrM29_V2.1260 | <i>L. braziliensis</i> | 41  | 1504 | 1544 |
| LbrM29_V2.1260 | <i>L. braziliensis</i> | 71  | 1561 | 1631 |
| LbrM29_V2.1260 | <i>L. braziliensis</i> | 52  | 1689 | 1740 |
| LbrM29_V2.1260 | <i>L. braziliensis</i> | 91  | 1784 | 1874 |
| LbrM29_V2.1260 | <i>L. braziliensis</i> | 239 | 1986 | 2224 |
| LbrM29_V2.1260 | <i>L. braziliensis</i> | 178 | 2274 | 2451 |
| LbrM29_V2.1270 | <i>L. braziliensis</i> | 69  | 37   | 105  |
| LbrM29_V2.1270 | <i>L. braziliensis</i> | 73  | 251  | 323  |
| LbrM29_V2.1270 | <i>L. braziliensis</i> | 73  | 251  | 323  |
| LbrM29_V2.1280 | <i>L. braziliensis</i> | 41  | 104  | 144  |
| LbrM29_V2.1280 | <i>L. braziliensis</i> | 109 | 372  | 480  |
| LbrM29_V2.1300 | <i>L. braziliensis</i> | 339 | 135  | 473  |
| LbrM29_V2.1310 | <i>L. braziliensis</i> | 600 | 1    | 600  |

|                |                        |     |      |      |
|----------------|------------------------|-----|------|------|
| LbrM29_V2.1310 | <i>L. braziliensis</i> | 468 | 613  | 1080 |
| LbrM29_V2.1310 | <i>L. braziliensis</i> | 165 | 1096 | 1260 |
| LbrM29_V2.1310 | <i>L. braziliensis</i> | 55  | 1296 | 1350 |
| LbrM29_V2.1310 | <i>L. braziliensis</i> | 48  | 1460 | 1507 |
| LbrM29_V2.1310 | <i>L. braziliensis</i> | 51  | 1604 | 1654 |
| LbrM29_V2.1310 | <i>L. braziliensis</i> | 374 | 1847 | 2220 |
| LbrM29_V2.1320 | <i>L. braziliensis</i> | 42  | 379  | 420  |
| LbrM29_V2.1320 | <i>L. braziliensis</i> | 60  | 528  | 587  |
| LbrM29_V2.1320 | <i>L. braziliensis</i> | 48  | 673  | 720  |
| LbrM29_V2.1330 | <i>L. braziliensis</i> | 253 | 42   | 294  |
| LbrM29_V2.1330 | <i>L. braziliensis</i> | 223 | 300  | 522  |
| LbrM29_V2.1330 | <i>L. braziliensis</i> | 303 | 535  | 837  |
| LbrM29_V2.1330 | <i>L. braziliensis</i> | 350 | 850  | 1199 |
| LbrM29_V2.1330 | <i>L. braziliensis</i> | 262 | 1233 | 1494 |
| LbrM29_V2.1330 | <i>L. braziliensis</i> | 355 | 1530 | 1884 |
| LbrM29_V2.1330 | <i>L. braziliensis</i> | 48  | 1901 | 1948 |
| LbrM29_V2.1350 | <i>L. braziliensis</i> | 45  | 53   | 97   |
| LbrM29_V2.1350 | <i>L. braziliensis</i> | 94  | 407  | 500  |
| LbrM29_V2.1350 | <i>L. braziliensis</i> | 94  | 407  | 500  |
| LbrM29_V2.1360 | <i>L. braziliensis</i> | 103 | 1    | 103  |
| LbrM29_V2.1360 | <i>L. braziliensis</i> | 105 | 134  | 238  |
| LbrM29_V2.1360 | <i>L. braziliensis</i> | 140 | 791  | 930  |
| LbrM29_V2.1360 | <i>L. braziliensis</i> | 71  | 970  | 1040 |
| LbrM29_V2.1360 | <i>L. braziliensis</i> | 262 | 1049 | 1310 |
| LbrM29_V2.1360 | <i>L. braziliensis</i> | 143 | 1406 | 1548 |
| LbrM29_V2.1370 | <i>L. braziliensis</i> | 44  | 52   | 95   |
| LbrM29_V2.1400 | <i>L. braziliensis</i> | 71  | 192  | 262  |
| LbrM29_V2.1400 | <i>L. braziliensis</i> | 92  | 316  | 407  |
| LbrM29_V2.1400 | <i>L. braziliensis</i> | 92  | 316  | 407  |
| LbrM29_V2.1410 | <i>L. braziliensis</i> | 138 | 1    | 138  |
| LbrM29_V2.1410 | <i>L. braziliensis</i> | 126 | 140  | 265  |
| LbrM29_V2.1410 | <i>L. braziliensis</i> | 43  | 415  | 457  |
| LbrM29_V2.1410 | <i>L. braziliensis</i> | 42  | 512  | 553  |
| LbrM29_V2.1420 | <i>L. braziliensis</i> | 140 | 1    | 140  |
| LbrM29_V2.1420 | <i>L. braziliensis</i> | 44  | 175  | 218  |
| LbrM29_V2.1420 | <i>L. braziliensis</i> | 44  | 175  | 218  |
| LbrM29_V2.1440 | <i>L. braziliensis</i> | 65  | 1    | 65   |
| LbrM29_V2.1440 | <i>L. braziliensis</i> | 113 | 252  | 364  |
| LbrM29_V2.1440 | <i>L. braziliensis</i> | 86  | 438  | 523  |
| LbrM29_V2.1440 | <i>L. braziliensis</i> | 63  | 544  | 606  |
| LbrM29_V2.1450 | <i>L. braziliensis</i> | 250 | 15   | 264  |
| LbrM29_V2.1450 | <i>L. braziliensis</i> | 67  | 363  | 429  |
| LbrM29_V2.1450 | <i>L. braziliensis</i> | 166 | 456  | 621  |
| LbrM29_V2.1460 | <i>L. braziliensis</i> | 60  | 1    | 60   |
| LbrM29_V2.1460 | <i>L. braziliensis</i> | 270 | 314  | 583  |
| LbrM29_V2.1460 | <i>L. braziliensis</i> | 71  | 714  | 784  |
| LbrM29_V2.1470 | <i>L. braziliensis</i> | 192 | 50   | 241  |



|                |                        |     |      |      |
|----------------|------------------------|-----|------|------|
| LbrM29_V2.1480 | <i>L. braziliensis</i> | 206 | 1    | 206  |
| LbrM29_V2.1490 | <i>L. braziliensis</i> | 197 | 1    | 197  |
| LbrM29_V2.1490 | <i>L. braziliensis</i> | 64  | 219  | 282  |
| LbrM29_V2.1490 | <i>L. braziliensis</i> | 165 | 287  | 451  |
| LbrM29_V2.1490 | <i>L. braziliensis</i> | 247 | 487  | 733  |
| LbrM29_V2.1490 | <i>L. braziliensis</i> | 73  | 751  | 823  |
| LbrM29_V2.1490 | <i>L. braziliensis</i> | 286 | 871  | 1156 |
| LbrM29_V2.1500 | <i>L. braziliensis</i> | 142 | 1    | 142  |
| LbrM29_V2.1500 | <i>L. braziliensis</i> | 124 | 327  | 450  |
| LbrM29_V2.1500 | <i>L. braziliensis</i> | 47  | 589  | 635  |
| LbrM29_V2.1510 | <i>L. braziliensis</i> | 165 | 1    | 165  |
| LbrM29_V2.1510 | <i>L. braziliensis</i> | 46  | 212  | 257  |
| LbrM29_V2.1510 | <i>L. braziliensis</i> | 52  | 282  | 333  |
| LbrM29_V2.1510 | <i>L. braziliensis</i> | 47  | 375  | 421  |
| LbrM29_V2.1510 | <i>L. braziliensis</i> | 246 | 453  | 698  |
| LbrM29_V2.1510 | <i>L. braziliensis</i> | 156 | 708  | 863  |
| LbrM29_V2.1510 | <i>L. braziliensis</i> | 165 | 883  | 1047 |
| LbrM29_V2.1510 | <i>L. braziliensis</i> | 80  | 1079 | 1158 |
| LbrM29_V2.1510 | <i>L. braziliensis</i> | 54  | 1188 | 1241 |
| LbrM29_V2.1510 | <i>L. braziliensis</i> | 101 | 1266 | 1366 |
| LbrM29_V2.1520 | <i>L. braziliensis</i> | 85  | 1    | 85   |
| LbrM29_V2.1520 | <i>L. braziliensis</i> | 82  | 280  | 361  |
| LbrM29_V2.1520 | <i>L. braziliensis</i> | 82  | 280  | 361  |
| LbrM29_V2.1540 | <i>L. braziliensis</i> | 72  | 32   | 103  |
| LbrM29_V2.1540 | <i>L. braziliensis</i> | 70  | 254  | 323  |
| LbrM29_V2.1540 | <i>L. braziliensis</i> | 59  | 563  | 621  |
| LbrM29_V2.1540 | <i>L. braziliensis</i> | 67  | 644  | 710  |
| LbrM29_V2.1540 | <i>L. braziliensis</i> | 44  | 827  | 870  |
| LbrM29_V2.1550 | <i>L. braziliensis</i> | 49  | 79   | 127  |
| LbrM29_V2.1550 | <i>L. braziliensis</i> | 67  | 183  | 249  |
| LbrM29_V2.1550 | <i>L. braziliensis</i> | 98  | 291  | 388  |
| LbrM29_V2.1550 | <i>L. braziliensis</i> | 93  | 438  | 530  |
| LbrM29_V2.1550 | <i>L. braziliensis</i> | 104 | 930  | 1033 |
| LbrM29_V2.1560 | <i>L. braziliensis</i> | 134 | 1    | 134  |
| LbrM29_V2.1560 | <i>L. braziliensis</i> | 83  | 264  | 346  |
| LbrM29_V2.1570 | <i>L. braziliensis</i> | 71  | 173  | 243  |
| LbrM29_V2.1580 | <i>L. braziliensis</i> | 72  | 15   | 86   |
| LbrM29_V2.1580 | <i>L. braziliensis</i> | 104 | 374  | 477  |
| LbrM29_V2.1580 | <i>L. braziliensis</i> | 108 | 805  | 912  |
| LbrM29_V2.1590 | <i>L. braziliensis</i> | 114 | 308  | 421  |
| LbrM29_V2.1600 | <i>L. braziliensis</i> | 97  | 292  | 388  |
| LbrM29_V2.1610 | <i>L. braziliensis</i> | 64  | 292  | 355  |
| LbrM29_V2.1620 | <i>L. braziliensis</i> | 47  | 73   | 119  |
| LbrM29_V2.1620 | <i>L. braziliensis</i> | 54  | 175  | 228  |
| LbrM29_V2.1620 | <i>L. braziliensis</i> | 49  | 348  | 396  |
| LbrM29_V2.1620 | <i>L. braziliensis</i> | 61  | 605  | 665  |
| LbrM29_V2.1640 | <i>L. braziliensis</i> | 93  | 235  | 327  |

|                |                        |     |      |      |
|----------------|------------------------|-----|------|------|
| LbrM29_V2.1650 | <i>L. braziliensis</i> | 107 | 1    | 107  |
| LbrM29_V2.1650 | <i>L. braziliensis</i> | 128 | 128  | 255  |
| LbrM29_V2.1650 | <i>L. braziliensis</i> | 51  | 536  | 586  |
| LbrM29_V2.1670 | <i>L. braziliensis</i> | 67  | 49   | 115  |
| LbrM29_V2.1670 | <i>L. braziliensis</i> | 85  | 200  | 284  |
| LbrM29_V2.1680 | <i>L. braziliensis</i> | 73  | 122  | 194  |
| LbrM29_V2.1680 | <i>L. braziliensis</i> | 128 | 236  | 363  |
| LbrM29_V2.1700 | <i>L. braziliensis</i> | 63  | 1    | 63   |
| LbrM29_V2.1700 | <i>L. braziliensis</i> | 565 | 144  | 708  |
| LbrM29_V2.1730 | <i>L. braziliensis</i> | 93  | 66   | 158  |
| LbrM29_V2.1730 | <i>L. braziliensis</i> | 72  | 268  | 339  |
| LbrM29_V2.1730 | <i>L. braziliensis</i> | 41  | 540  | 580  |
| LbrM29_V2.1730 | <i>L. braziliensis</i> | 79  | 738  | 816  |
| LbrM29_V2.1730 | <i>L. braziliensis</i> | 58  | 922  | 979  |
| LbrM29_V2.1730 | <i>L. braziliensis</i> | 77  | 1018 | 1094 |
| LbrM29_V2.1730 | <i>L. braziliensis</i> | 43  | 1214 | 1256 |
| LbrM29_V2.1730 | <i>L. braziliensis</i> | 60  | 1293 | 1352 |
| LbrM29_V2.1730 | <i>L. braziliensis</i> | 63  | 1650 | 1712 |
| LbrM29_V2.1730 | <i>L. braziliensis</i> | 40  | 1862 | 1901 |
| LbrM29_V2.1730 | <i>L. braziliensis</i> | 66  | 2017 | 2082 |
| LbrM29_V2.1730 | <i>L. braziliensis</i> | 53  | 2154 | 2206 |
| LbrM29_V2.1740 | <i>L. braziliensis</i> | 76  | 1    | 76   |
| LbrM29_V2.1740 | <i>L. braziliensis</i> | 117 | 301  | 417  |
| LbrM29_V2.1740 | <i>L. braziliensis</i> | 61  | 1159 | 1219 |
| LbrM29_V2.1750 | <i>L. braziliensis</i> | 44  | 1    | 44   |
| LbrM29_V2.1750 | <i>L. braziliensis</i> | 41  | 195  | 235  |
| LbrM29_V2.1750 | <i>L. braziliensis</i> | 85  | 353  | 437  |
| LbrM29_V2.1760 | <i>L. braziliensis</i> | 123 | 93   | 215  |
| LbrM29_V2.1760 | <i>L. braziliensis</i> | 65  | 266  | 330  |
| LbrM29_V2.1760 | <i>L. braziliensis</i> | 50  | 405  | 454  |
| LbrM29_V2.1770 | <i>L. braziliensis</i> | 41  | 1    | 41   |
| LbrM29_V2.1770 | <i>L. braziliensis</i> | 40  | 134  | 173  |
| LbrM29_V2.1770 | <i>L. braziliensis</i> | 40  | 134  | 173  |
| LbrM29_V2.1790 | <i>L. braziliensis</i> | 52  | 209  | 260  |
| LbrM29_V2.1790 | <i>L. braziliensis</i> | 101 | 594  | 694  |
| LbrM29_V2.1790 | <i>L. braziliensis</i> | 319 | 848  | 1166 |
| LbrM29_V2.1790 | <i>L. braziliensis</i> | 43  | 1180 | 1222 |
| LbrM29_V2.1800 | <i>L. braziliensis</i> | 47  | 1    | 47   |
| LbrM29_V2.1800 | <i>L. braziliensis</i> | 42  | 412  | 453  |
| LbrM29_V2.1800 | <i>L. braziliensis</i> | 52  | 536  | 587  |
| LbrM29_V2.1800 | <i>L. braziliensis</i> | 50  | 932  | 981  |
| LbrM29_V2.1810 | <i>L. braziliensis</i> | 40  | 92   | 131  |
| LbrM29_V2.1820 | <i>L. braziliensis</i> | 40  | 92   | 131  |
| LbrM29_V2.1840 | <i>L. braziliensis</i> | 42  | 1    | 42   |
| LbrM29_V2.1840 | <i>L. braziliensis</i> | 50  | 59   | 108  |
| LbrM29_V2.1840 | <i>L. braziliensis</i> | 50  | 59   | 108  |
| LbrM29_V2.1850 | <i>L. braziliensis</i> | 73  | 40   | 112  |

|                |                        |     |      |      |
|----------------|------------------------|-----|------|------|
| LbrM29_V2.1850 | <i>L. braziliensis</i> | 53  | 138  | 190  |
| LbrM29_V2.1850 | <i>L. braziliensis</i> | 44  | 351  | 394  |
| LbrM29_V2.1850 | <i>L. braziliensis</i> | 48  | 602  | 649  |
| LbrM29_V2.1850 | <i>L. braziliensis</i> | 82  | 741  | 822  |
| LbrM29_V2.1860 | <i>L. braziliensis</i> | 101 | 69   | 169  |
| LbrM29_V2.1860 | <i>L. braziliensis</i> | 129 | 283  | 411  |
| LbrM29_V2.1870 | <i>L. braziliensis</i> | 40  | 85   | 124  |
| LbrM29_V2.1870 | <i>L. braziliensis</i> | 42  | 226  | 267  |
| LbrM29_V2.1870 | <i>L. braziliensis</i> | 77  | 293  | 369  |
| LbrM29_V2.1880 | <i>L. braziliensis</i> | 47  | 103  | 149  |
| LbrM29_V2.1880 | <i>L. braziliensis</i> | 64  | 302  | 365  |
| LbrM29_V2.1890 | <i>L. braziliensis</i> | 63  | 193  | 255  |
| LbrM29_V2.1900 | <i>L. braziliensis</i> | 66  | 1    | 66   |
| LbrM29_V2.1900 | <i>L. braziliensis</i> | 115 | 159  | 273  |
| LbrM29_V2.1920 | <i>L. braziliensis</i> | 45  | 58   | 102  |
| LbrM29_V2.1940 | <i>L. braziliensis</i> | 152 | 180  | 331  |
| LbrM29_V2.1940 | <i>L. braziliensis</i> | 126 | 336  | 461  |
| LbrM29_V2.1940 | <i>L. braziliensis</i> | 84  | 603  | 686  |
| LbrM29_V2.1940 | <i>L. braziliensis</i> | 80  | 700  | 779  |
| LbrM29_V2.1940 | <i>L. braziliensis</i> | 152 | 786  | 937  |
| LbrM29_V2.1940 | <i>L. braziliensis</i> | 77  | 1183 | 1259 |
| LbrM29_V2.1940 | <i>L. braziliensis</i> | 44  | 1298 | 1341 |
| LbrM29_V2.1940 | <i>L. braziliensis</i> | 133 | 1358 | 1490 |
| LbrM29_V2.1940 | <i>L. braziliensis</i> | 66  | 1587 | 1652 |
| LbrM29_V2.1940 | <i>L. braziliensis</i> | 89  | 1772 | 1860 |
| LbrM29_V2.1940 | <i>L. braziliensis</i> | 43  | 1919 | 1961 |
| LbrM29_V2.1950 | <i>L. braziliensis</i> | 58  | 26   | 83   |
| LbrM29_V2.1950 | <i>L. braziliensis</i> | 70  | 91   | 160  |
| LbrM29_V2.1950 | <i>L. braziliensis</i> | 43  | 402  | 444  |
| LbrM29_V2.1960 | <i>L. braziliensis</i> | 76  | 41   | 116  |
| LbrM29_V2.1970 | <i>L. braziliensis</i> | 47  | 361  | 407  |
| LbrM29_V2.1970 | <i>L. braziliensis</i> | 58  | 505  | 562  |
| LbrM29_V2.1980 | <i>L. braziliensis</i> | 42  | 494  | 535  |
| LbrM29_V2.1990 | <i>L. braziliensis</i> | 98  | 434  | 531  |
| LbrM29_V2.1990 | <i>L. braziliensis</i> | 90  | 603  | 692  |
| LbrM29_V2.1990 | <i>L. braziliensis</i> | 50  | 709  | 758  |
| LbrM29_V2.2000 | <i>L. braziliensis</i> | 184 | 201  | 384  |
| LbrM29_V2.2010 | <i>L. braziliensis</i> | 201 | 1    | 201  |
| LbrM29_V2.2010 | <i>L. braziliensis</i> | 97  | 215  | 311  |
| LbrM29_V2.2010 | <i>L. braziliensis</i> | 51  | 552  | 602  |
| LbrM29_V2.2010 | <i>L. braziliensis</i> | 59  | 750  | 808  |
| LbrM29_V2.2010 | <i>L. braziliensis</i> | 97  | 864  | 960  |
| LbrM29_V2.2010 | <i>L. braziliensis</i> | 252 | 978  | 1229 |
| LbrM29_V2.2020 | <i>L. braziliensis</i> | 280 | 16   | 295  |
| LbrM29_V2.2020 | <i>L. braziliensis</i> | 77  | 314  | 390  |
| LbrM29_V2.2020 | <i>L. braziliensis</i> | 58  | 423  | 480  |
| LbrM29_V2.2020 | <i>L. braziliensis</i> | 176 | 555  | 730  |

|                |                        |     |      |      |
|----------------|------------------------|-----|------|------|
| LbrM29_V2.2030 | <i>L. braziliensis</i> | 44  | 16   | 59   |
| LbrM29_V2.2030 | <i>L. braziliensis</i> | 52  | 971  | 1022 |
| LbrM29_V2.2030 | <i>L. braziliensis</i> | 52  | 971  | 1022 |
| LbrM29_V2.2040 | <i>L. braziliensis</i> | 114 | 1    | 114  |
| LbrM29_V2.2040 | <i>L. braziliensis</i> | 154 | 246  | 399  |
| LbrM29_V2.2070 | <i>L. braziliensis</i> | 88  | 102  | 189  |
| LbrM29_V2.2070 | <i>L. braziliensis</i> | 65  | 353  | 417  |
| LbrM29_V2.2070 | <i>L. braziliensis</i> | 76  | 477  | 552  |
| LbrM29_V2.2070 | <i>L. braziliensis</i> | 93  | 1047 | 1139 |
| LbrM29_V2.2070 | <i>L. braziliensis</i> | 59  | 1494 | 1552 |
| LbrM29_V2.2080 | <i>L. braziliensis</i> | 65  | 193  | 257  |
| LbrM29_V2.2080 | <i>L. braziliensis</i> | 54  | 358  | 411  |
| LbrM29_V2.2080 | <i>L. braziliensis</i> | 54  | 358  | 411  |
| LbrM29_V2.2090 | <i>L. braziliensis</i> | 40  | 353  | 392  |
| LbrM29_V2.2130 | <i>L. braziliensis</i> | 65  | 51   | 115  |
| LbrM29_V2.2150 | <i>L. braziliensis</i> | 44  | 49   | 92   |
| LbrM29_V2.2150 | <i>L. braziliensis</i> | 66  | 303  | 368  |
| LbrM29_V2.2150 | <i>L. braziliensis</i> | 66  | 546  | 611  |
| LbrM29_V2.2160 | <i>L. braziliensis</i> | 266 | 1    | 266  |
| LbrM29_V2.2170 | <i>L. braziliensis</i> | 51  | 126  | 176  |
| LbrM29_V2.2170 | <i>L. braziliensis</i> | 50  | 998  | 1047 |
| LbrM29_V2.2170 | <i>L. braziliensis</i> | 50  | 998  | 1047 |
| LbrM29_V2.2180 | <i>L. braziliensis</i> | 84  | 495  | 578  |
| LbrM29_V2.2180 | <i>L. braziliensis</i> | 52  | 641  | 692  |
| LbrM29_V2.2190 | <i>L. braziliensis</i> | 121 | 165  | 285  |
| LbrM29_V2.2200 | <i>L. braziliensis</i> | 55  | 36   | 90   |
| LbrM29_V2.2200 | <i>L. braziliensis</i> | 67  | 121  | 187  |
| LbrM29_V2.2210 | <i>L. braziliensis</i> | 40  | 37   | 76   |
| LbrM29_V2.2210 | <i>L. braziliensis</i> | 107 | 177  | 283  |
| LbrM29_V2.2230 | <i>L. braziliensis</i> | 198 | 1    | 198  |
| LbrM29_V2.2230 | <i>L. braziliensis</i> | 69  | 548  | 616  |
| LbrM29_V2.2240 | <i>L. braziliensis</i> | 73  | 1    | 73   |
| LbrM29_V2.2240 | <i>L. braziliensis</i> | 74  | 187  | 260  |
| LbrM29_V2.2240 | <i>L. braziliensis</i> | 74  | 187  | 260  |
| LbrM29_V2.2260 | <i>L. braziliensis</i> | 300 | 1    | 300  |
| LbrM29_V2.2270 | <i>L. braziliensis</i> | 48  | 132  | 179  |
| LbrM29_V2.2300 | <i>L. braziliensis</i> | 43  | 168  | 210  |
| LbrM29_V2.2300 | <i>L. braziliensis</i> | 94  | 289  | 382  |
| LbrM29_V2.2350 | <i>L. braziliensis</i> | 70  | 82   | 151  |
| LbrM29_V2.2350 | <i>L. braziliensis</i> | 44  | 174  | 217  |
| LbrM29_V2.2350 | <i>L. braziliensis</i> | 54  | 295  | 348  |
| LbrM29_V2.2360 | <i>L. braziliensis</i> | 70  | 152  | 221  |
| LbrM29_V2.2360 | <i>L. braziliensis</i> | 44  | 244  | 287  |
| LbrM29_V2.2360 | <i>L. braziliensis</i> | 49  | 341  | 389  |
| LbrM29_V2.2370 | <i>L. braziliensis</i> | 50  | 1    | 50   |
| LbrM29_V2.2390 | <i>L. braziliensis</i> | 145 | 42   | 186  |
| LbrM29_V2.2390 | <i>L. braziliensis</i> | 71  | 198  | 268  |

|                |                        |     |      |      |
|----------------|------------------------|-----|------|------|
| LbrM29_V2.2390 | <i>L. braziliensis</i> | 345 | 353  | 697  |
| LbrM29_V2.2400 | <i>L. braziliensis</i> | 638 | 55   | 692  |
| LbrM29_V2.2410 | <i>L. braziliensis</i> | 82  | 1    | 82   |
| LbrM29_V2.2430 | <i>L. braziliensis</i> | 83  | 1    | 83   |
| LbrM29_V2.2430 | <i>L. braziliensis</i> | 90  | 131  | 220  |
| LbrM29_V2.2440 | <i>L. braziliensis</i> | 83  | 1    | 83   |
| LbrM29_V2.2440 | <i>L. braziliensis</i> | 90  | 131  | 220  |
| LbrM29_V2.2450 | <i>L. braziliensis</i> | 971 | 1    | 971  |
| LbrM29_V2.2470 | <i>L. braziliensis</i> | 55  | 63   | 117  |
| LbrM29_V2.2470 | <i>L. braziliensis</i> | 65  | 367  | 431  |
| LbrM29_V2.2470 | <i>L. braziliensis</i> | 65  | 367  | 431  |
| LbrM29_V2.2490 | <i>L. braziliensis</i> | 91  | 300  | 390  |
| LbrM29_V2.2520 | <i>L. braziliensis</i> | 61  | 773  | 833  |
| LbrM29_V2.2530 | <i>L. braziliensis</i> | 56  | 1    | 56   |
| LbrM29_V2.2530 | <i>L. braziliensis</i> | 103 | 69   | 171  |
| LbrM29_V2.2530 | <i>L. braziliensis</i> | 40  | 182  | 221  |
| LbrM29_V2.2530 | <i>L. braziliensis</i> | 40  | 293  | 332  |
| LbrM29_V2.2540 | <i>L. braziliensis</i> | 149 | 280  | 428  |
| LbrM29_V2.2550 | <i>L. braziliensis</i> | 48  | 1    | 48   |
| LbrM29_V2.2550 | <i>L. braziliensis</i> | 101 | 78   | 178  |
| LbrM29_V2.2550 | <i>L. braziliensis</i> | 470 | 200  | 669  |
| LbrM29_V2.2560 | <i>L. braziliensis</i> | 57  | 1    | 57   |
| LbrM29_V2.2560 | <i>L. braziliensis</i> | 282 | 145  | 426  |
| LbrM29_V2.2560 | <i>L. braziliensis</i> | 71  | 524  | 594  |
| LbrM29_V2.2570 | <i>L. braziliensis</i> | 43  | 315  | 357  |
| LbrM29_V2.2580 | <i>L. braziliensis</i> | 108 | 1    | 108  |
| LbrM29_V2.2580 | <i>L. braziliensis</i> | 48  | 161  | 208  |
| LbrM29_V2.2580 | <i>L. braziliensis</i> | 72  | 641  | 712  |
| LbrM29_V2.2600 | <i>L. braziliensis</i> | 61  | 113  | 173  |
| LbrM29_V2.2600 | <i>L. braziliensis</i> | 47  | 210  | 256  |
| LbrM29_V2.2600 | <i>L. braziliensis</i> | 90  | 259  | 348  |
| LbrM29_V2.2600 | <i>L. braziliensis</i> | 65  | 378  | 442  |
| LbrM29_V2.2600 | <i>L. braziliensis</i> | 70  | 502  | 571  |
| LbrM29_V2.2600 | <i>L. braziliensis</i> | 66  | 656  | 721  |
| LbrM29_V2.2600 | <i>L. braziliensis</i> | 139 | 781  | 919  |
| LbrM29_V2.2600 | <i>L. braziliensis</i> | 48  | 974  | 1021 |
| LbrM29_V2.2600 | <i>L. braziliensis</i> | 91  | 1037 | 1127 |
| LbrM29_V2.2600 | <i>L. braziliensis</i> | 78  | 1136 | 1213 |
| LbrM29_V2.2620 | <i>L. braziliensis</i> | 44  | 1    | 44   |
| LbrM29_V2.2620 | <i>L. braziliensis</i> | 80  | 462  | 541  |
| LbrM29_V2.2620 | <i>L. braziliensis</i> | 65  | 824  | 888  |
| LbrM29_V2.2620 | <i>L. braziliensis</i> | 40  | 947  | 986  |
| LbrM29_V2.2630 | <i>L. braziliensis</i> | 113 | 753  | 865  |
| LbrM29_V2.2640 | <i>L. braziliensis</i> | 71  | 252  | 322  |
| LbrM29_V2.2640 | <i>L. braziliensis</i> | 96  | 348  | 443  |
| LbrM29_V2.2650 | <i>L. braziliensis</i> | 43  | 54   | 96   |
| LbrM29_V2.2650 | <i>L. braziliensis</i> | 50  | 110  | 159  |

|                |                        |     |      |      |
|----------------|------------------------|-----|------|------|
| LbrM29_V2.2650 | <i>L. braziliensis</i> | 80  | 194  | 273  |
| LbrM29_V2.2660 | <i>L. braziliensis</i> | 339 | 166  | 504  |
| LbrM29_V2.2680 | <i>L. braziliensis</i> | 90  | 535  | 624  |
| LbrM29_V2.2680 | <i>L. braziliensis</i> | 73  | 651  | 723  |
| LbrM29_V2.2680 | <i>L. braziliensis</i> | 73  | 651  | 723  |
| LbrM29_V2.2690 | <i>L. braziliensis</i> | 80  | 1    | 80   |
| LbrM29_V2.2690 | <i>L. braziliensis</i> | 41  | 82   | 122  |
| LbrM29_V2.2690 | <i>L. braziliensis</i> | 68  | 254  | 321  |
| LbrM29_V2.2690 | <i>L. braziliensis</i> | 82  | 606  | 687  |
| LbrM29_V2.2710 | <i>L. braziliensis</i> | 48  | 74   | 121  |
| LbrM29_V2.2710 | <i>L. braziliensis</i> | 43  | 276  | 318  |
| LbrM29_V2.2710 | <i>L. braziliensis</i> | 168 | 439  | 606  |
| LbrM29_V2.2710 | <i>L. braziliensis</i> | 41  | 664  | 704  |
| LbrM29_V2.2710 | <i>L. braziliensis</i> | 61  | 804  | 864  |
| LbrM29_V2.2710 | <i>L. braziliensis</i> | 99  | 1104 | 1202 |
| LbrM29_V2.2710 | <i>L. braziliensis</i> | 49  | 1248 | 1296 |
| LbrM29_V2.2710 | <i>L. braziliensis</i> | 86  | 1308 | 1393 |
| LbrM29_V2.2710 | <i>L. braziliensis</i> | 164 | 1503 | 1666 |
| LbrM29_V2.2710 | <i>L. braziliensis</i> | 61  | 1802 | 1862 |
| LbrM29_V2.2720 | <i>L. braziliensis</i> | 84  | 181  | 264  |
| LbrM29_V2.2730 | <i>L. braziliensis</i> | 41  | 66   | 106  |
| LbrM29_V2.2740 | <i>L. braziliensis</i> | 357 | 92   | 448  |
| LbrM29_V2.2740 | <i>L. braziliensis</i> | 158 | 856  | 1013 |
| LbrM29_V2.2750 | <i>L. braziliensis</i> | 194 | 53   | 246  |
| LbrM29_V2.2780 | <i>L. braziliensis</i> | 43  | 1    | 43   |
| LbrM29_V2.2780 | <i>L. braziliensis</i> | 87  | 238  | 324  |
| LbrM29_V2.2780 | <i>L. braziliensis</i> | 87  | 238  | 324  |
| LbrM29_V2.2790 | <i>L. braziliensis</i> | 45  | 251  | 295  |
| LbrM29_V2.2800 | <i>L. braziliensis</i> | 63  | 143  | 205  |
| LbrM29_V2.2820 | <i>L. braziliensis</i> | 40  | 1    | 40   |
| LbrM29_V2.2870 | <i>L. braziliensis</i> | 179 | 557  | 735  |
| LbrM29_V2.2890 | <i>L. braziliensis</i> | 108 | 1    | 108  |
| LbrM29_V2.2900 | <i>L. braziliensis</i> | 42  | 1    | 42   |
| LbrM29_V2.2910 | <i>L. braziliensis</i> | 110 | 168  | 277  |
| LbrM29_V2.2920 | <i>L. braziliensis</i> | 91  | 1    | 91   |
| LbrM29_V2.2920 | <i>L. braziliensis</i> | 60  | 106  | 165  |
| LbrM29_V2.2920 | <i>L. braziliensis</i> | 51  | 167  | 217  |
| LbrM29_V2.2920 | <i>L. braziliensis</i> | 525 | 398  | 922  |
| LbrM29_V2.2930 | <i>L. braziliensis</i> | 87  | 203  | 289  |
| LbrM29_V2.2930 | <i>L. braziliensis</i> | 76  | 323  | 398  |
| LbrM29_V2.2930 | <i>L. braziliensis</i> | 76  | 323  | 398  |
| LbrM30_V2.0040 | <i>L. braziliensis</i> | 58  | 182  | 239  |
| LbrM30_V2.0060 | <i>L. braziliensis</i> | 170 | 92   | 261  |
| LbrM30_V2.0060 | <i>L. braziliensis</i> | 219 | 543  | 761  |
| LbrM30_V2.0070 | <i>L. braziliensis</i> | 42  | 142  | 183  |
| LbrM30_V2.0090 | <i>L. braziliensis</i> | 55  | 1    | 55   |
| LbrM30_V2.0100 | <i>L. braziliensis</i> | 203 | 1    | 203  |

|                |                        |     |      |      |
|----------------|------------------------|-----|------|------|
| LbrM30_V2.0130 | <i>L. braziliensis</i> | 49  | 573  | 621  |
| LbrM30_V2.0140 | <i>L. braziliensis</i> | 43  | 473  | 515  |
| LbrM30_V2.0150 | <i>L. braziliensis</i> | 40  | 1    | 40   |
| LbrM30_V2.0200 | <i>L. braziliensis</i> | 98  | 237  | 334  |
| LbrM30_V2.0200 | <i>L. braziliensis</i> | 48  | 379  | 426  |
| LbrM30_V2.0200 | <i>L. braziliensis</i> | 48  | 379  | 426  |
| LbrM30_V2.0220 | <i>L. braziliensis</i> | 53  | 13   | 65   |
| LbrM30_V2.0230 | <i>L. braziliensis</i> | 120 | 184  | 303  |
| LbrM30_V2.0230 | <i>L. braziliensis</i> | 108 | 325  | 432  |
| LbrM30_V2.0250 | <i>L. braziliensis</i> | 61  | 341  | 401  |
| LbrM30_V2.0250 | <i>L. braziliensis</i> | 60  | 504  | 563  |
| LbrM30_V2.0250 | <i>L. braziliensis</i> | 60  | 504  | 563  |
| LbrM30_V2.0260 | <i>L. braziliensis</i> | 59  | 406  | 464  |
| LbrM30_V2.0260 | <i>L. braziliensis</i> | 67  | 1062 | 1128 |
| LbrM30_V2.0260 | <i>L. braziliensis</i> | 67  | 1062 | 1128 |
| LbrM30_V2.0270 | <i>L. braziliensis</i> | 69  | 142  | 210  |
| LbrM30_V2.0270 | <i>L. braziliensis</i> | 53  | 313  | 365  |
| LbrM30_V2.0270 | <i>L. braziliensis</i> | 81  | 389  | 469  |
| LbrM30_V2.0270 | <i>L. braziliensis</i> | 60  | 582  | 641  |
| LbrM30_V2.0280 | <i>L. braziliensis</i> | 62  | 334  | 395  |
| LbrM30_V2.0290 | <i>L. braziliensis</i> | 41  | 33   | 73   |
| LbrM30_V2.0300 | <i>L. braziliensis</i> | 45  | 633  | 677  |
| LbrM30_V2.0300 | <i>L. braziliensis</i> | 72  | 1041 | 1112 |
| LbrM30_V2.0300 | <i>L. braziliensis</i> | 84  | 1147 | 1230 |
| LbrM30_V2.0310 | <i>L. braziliensis</i> | 68  | 15   | 82   |
| LbrM30_V2.0320 | <i>L. braziliensis</i> | 60  | 251  | 310  |
| LbrM30_V2.0320 | <i>L. braziliensis</i> | 320 | 359  | 678  |
| LbrM30_V2.0320 | <i>L. braziliensis</i> | 122 | 880  | 1001 |
| LbrM30_V2.0320 | <i>L. braziliensis</i> | 353 | 1011 | 1363 |
| LbrM30_V2.0330 | <i>L. braziliensis</i> | 57  | 216  | 272  |
| LbrM30_V2.0330 | <i>L. braziliensis</i> | 44  | 301  | 344  |
| LbrM30_V2.0330 | <i>L. braziliensis</i> | 102 | 378  | 479  |
| LbrM30_V2.0340 | <i>L. braziliensis</i> | 119 | 299  | 417  |
| LbrM30_V2.0340 | <i>L. braziliensis</i> | 80  | 436  | 515  |
| LbrM30_V2.0350 | <i>L. braziliensis</i> | 52  | 1    | 52   |
| LbrM30_V2.0350 | <i>L. braziliensis</i> | 163 | 189  | 351  |
| LbrM30_V2.0350 | <i>L. braziliensis</i> | 163 | 189  | 351  |
| LbrM30_V2.0360 | <i>L. braziliensis</i> | 131 | 76   | 206  |
| LbrM30_V2.0360 | <i>L. braziliensis</i> | 259 | 291  | 549  |
| LbrM30_V2.0360 | <i>L. braziliensis</i> | 130 | 696  | 825  |
| LbrM30_V2.0360 | <i>L. braziliensis</i> | 87  | 859  | 945  |
| LbrM30_V2.0360 | <i>L. braziliensis</i> | 53  | 1261 | 1313 |
| LbrM30_V2.0370 | <i>L. braziliensis</i> | 108 | 1    | 108  |
| LbrM30_V2.0370 | <i>L. braziliensis</i> | 118 | 612  | 729  |
| LbrM30_V2.0370 | <i>L. braziliensis</i> | 86  | 749  | 834  |
| LbrM30_V2.0380 | <i>L. braziliensis</i> | 44  | 269  | 312  |
| LbrM30_V2.0380 | <i>L. braziliensis</i> | 101 | 545  | 645  |

|                |                        |     |      |      |
|----------------|------------------------|-----|------|------|
| LbrM30_V2.0380 | <i>L. braziliensis</i> | 101 | 545  | 645  |
| LbrM30_V2.0390 | <i>L. braziliensis</i> | 60  | 1    | 60   |
| LbrM30_V2.0390 | <i>L. braziliensis</i> | 48  | 379  | 426  |
| LbrM30_V2.0390 | <i>L. braziliensis</i> | 122 | 486  | 607  |
| LbrM30_V2.0420 | <i>L. braziliensis</i> | 40  | 345  | 384  |
| LbrM30_V2.0430 | <i>L. braziliensis</i> | 45  | 27   | 71   |
| LbrM30_V2.0430 | <i>L. braziliensis</i> | 99  | 129  | 227  |
| LbrM30_V2.0430 | <i>L. braziliensis</i> | 99  | 129  | 227  |
| LbrM30_V2.0440 | <i>L. braziliensis</i> | 48  | 1    | 48   |
| LbrM30_V2.0440 | <i>L. braziliensis</i> | 75  | 123  | 197  |
| LbrM30_V2.0440 | <i>L. braziliensis</i> | 53  | 245  | 297  |
| LbrM30_V2.0440 | <i>L. braziliensis</i> | 131 | 300  | 430  |
| LbrM30_V2.0450 | <i>L. braziliensis</i> | 40  | 92   | 131  |
| LbrM30_V2.0460 | <i>L. braziliensis</i> | 68  | 45   | 112  |
| LbrM30_V2.0460 | <i>L. braziliensis</i> | 42  | 290  | 331  |
| LbrM30_V2.0460 | <i>L. braziliensis</i> | 82  | 378  | 459  |
| LbrM30_V2.0460 | <i>L. braziliensis</i> | 177 | 670  | 846  |
| LbrM30_V2.0460 | <i>L. braziliensis</i> | 111 | 1026 | 1136 |
| LbrM30_V2.0470 | <i>L. braziliensis</i> | 62  | 322  | 383  |
| LbrM30_V2.0490 | <i>L. braziliensis</i> | 66  | 1    | 66   |
| LbrM30_V2.0500 | <i>L. braziliensis</i> | 58  | 310  | 367  |
| LbrM30_V2.0530 | <i>L. braziliensis</i> | 92  | 1    | 92   |
| LbrM30_V2.0540 | <i>L. braziliensis</i> | 46  | 1    | 46   |
| LbrM30_V2.0550 | <i>L. braziliensis</i> | 67  | 291  | 357  |
| LbrM30_V2.0550 | <i>L. braziliensis</i> | 49  | 498  | 546  |
| LbrM30_V2.0560 | <i>L. braziliensis</i> | 55  | 1    | 55   |
| LbrM30_V2.0560 | <i>L. braziliensis</i> | 144 | 68   | 211  |
| LbrM30_V2.0570 | <i>L. braziliensis</i> | 462 | 1    | 462  |
| LbrM30_V2.0570 | <i>L. braziliensis</i> | 77  | 485  | 561  |
| LbrM30_V2.0570 | <i>L. braziliensis</i> | 136 | 574  | 709  |
| LbrM30_V2.0580 | <i>L. braziliensis</i> | 423 | 1    | 423  |
| LbrM30_V2.0590 | <i>L. braziliensis</i> | 76  | 130  | 205  |
| LbrM30_V2.0590 | <i>L. braziliensis</i> | 96  | 464  | 559  |
| LbrM30_V2.0590 | <i>L. braziliensis</i> | 112 | 572  | 683  |
| LbrM30_V2.0590 | <i>L. braziliensis</i> | 57  | 711  | 767  |
| LbrM30_V2.0590 | <i>L. braziliensis</i> | 72  | 831  | 902  |
| LbrM30_V2.0590 | <i>L. braziliensis</i> | 130 | 940  | 1069 |
| LbrM30_V2.0590 | <i>L. braziliensis</i> | 41  | 1102 | 1142 |
| LbrM30_V2.0600 | <i>L. braziliensis</i> | 48  | 694  | 741  |
| LbrM30_V2.0630 | <i>L. braziliensis</i> | 75  | 535  | 609  |
| LbrM30_V2.0640 | <i>L. braziliensis</i> | 273 | 54   | 326  |
| LbrM30_V2.0650 | <i>L. braziliensis</i> | 136 | 1    | 136  |
| LbrM30_V2.0650 | <i>L. braziliensis</i> | 129 | 350  | 478  |
| LbrM30_V2.0680 | <i>L. braziliensis</i> | 209 | 48   | 256  |
| LbrM30_V2.0680 | <i>L. braziliensis</i> | 94  | 262  | 355  |
| LbrM30_V2.0680 | <i>L. braziliensis</i> | 291 | 627  | 917  |
| LbrM30_V2.0690 | <i>L. braziliensis</i> | 80  | 1    | 80   |



|                |                        |     |      |      |
|----------------|------------------------|-----|------|------|
| LbrM30_V2.0700 | <i>L. braziliensis</i> | 126 | 91   | 216  |
| LbrM30_V2.0710 | <i>L. braziliensis</i> | 66  | 1    | 66   |
| LbrM30_V2.0730 | <i>L. braziliensis</i> | 49  | 11   | 59   |
| LbrM30_V2.0740 | <i>L. braziliensis</i> | 73  | 1    | 73   |
| LbrM30_V2.0770 | <i>L. braziliensis</i> | 56  | 45   | 100  |
| LbrM30_V2.0800 | <i>L. braziliensis</i> | 56  | 491  | 546  |
| LbrM30_V2.0820 | <i>L. braziliensis</i> | 98  | 1    | 98   |
| LbrM30_V2.0850 | <i>L. braziliensis</i> | 107 | 629  | 735  |
| LbrM30_V2.0850 | <i>L. braziliensis</i> | 47  | 868  | 914  |
| LbrM30_V2.0850 | <i>L. braziliensis</i> | 91  | 1063 | 1153 |
| LbrM30_V2.0850 | <i>L. braziliensis</i> | 200 | 1191 | 1390 |
| LbrM30_V2.0850 | <i>L. braziliensis</i> | 93  | 1721 | 1813 |
| LbrM30_V2.0850 | <i>L. braziliensis</i> | 132 | 1818 | 1949 |
| LbrM30_V2.0860 | <i>L. braziliensis</i> | 138 | 23   | 160  |
| LbrM30_V2.0880 | <i>L. braziliensis</i> | 262 | 881  | 1142 |
| LbrM30_V2.0900 | <i>L. braziliensis</i> | 128 | 82   | 209  |
| LbrM30_V2.0900 | <i>L. braziliensis</i> | 43  | 321  | 363  |
| LbrM30_V2.0900 | <i>L. braziliensis</i> | 51  | 518  | 568  |
| LbrM30_V2.0910 | <i>L. braziliensis</i> | 178 | 1    | 178  |
| LbrM30_V2.0920 | <i>L. braziliensis</i> | 114 | 397  | 510  |
| LbrM30_V2.0930 | <i>L. braziliensis</i> | 59  | 124  | 182  |
| LbrM30_V2.0950 | <i>L. braziliensis</i> | 129 | 74   | 202  |
| LbrM30_V2.0950 | <i>L. braziliensis</i> | 44  | 218  | 261  |
| LbrM30_V2.0950 | <i>L. braziliensis</i> | 78  | 448  | 525  |
| LbrM30_V2.0950 | <i>L. braziliensis</i> | 163 | 591  | 753  |
| LbrM30_V2.0960 | <i>L. braziliensis</i> | 51  | 1    | 51   |
| LbrM30_V2.0960 | <i>L. braziliensis</i> | 59  | 88   | 146  |
| LbrM30_V2.0960 | <i>L. braziliensis</i> | 59  | 88   | 146  |
| LbrM30_V2.0970 | <i>L. braziliensis</i> | 157 | 1    | 157  |
| LbrM30_V2.0970 | <i>L. braziliensis</i> | 75  | 860  | 934  |
| LbrM30_V2.1020 | <i>L. braziliensis</i> | 217 | 1    | 217  |
| LbrM30_V2.1020 | <i>L. braziliensis</i> | 69  | 352  | 420  |
| LbrM30_V2.1020 | <i>L. braziliensis</i> | 149 | 457  | 605  |
| LbrM30_V2.1030 | <i>L. braziliensis</i> | 49  | 1    | 49   |
| LbrM30_V2.1030 | <i>L. braziliensis</i> | 49  | 125  | 173  |
| LbrM30_V2.1030 | <i>L. braziliensis</i> | 110 | 565  | 674  |
| LbrM30_V2.1030 | <i>L. braziliensis</i> | 44  | 741  | 784  |
| LbrM30_V2.1030 | <i>L. braziliensis</i> | 41  | 927  | 967  |
| LbrM30_V2.1040 | <i>L. braziliensis</i> | 68  | 28   | 95   |
| LbrM30_V2.1040 | <i>L. braziliensis</i> | 57  | 197  | 253  |
| LbrM30_V2.1040 | <i>L. braziliensis</i> | 56  | 343  | 398  |
| LbrM30_V2.1040 | <i>L. braziliensis</i> | 56  | 467  | 522  |
| LbrM30_V2.1040 | <i>L. braziliensis</i> | 57  | 544  | 600  |
| LbrM30_V2.1060 | <i>L. braziliensis</i> | 43  | 15   | 57   |
| LbrM30_V2.1060 | <i>L. braziliensis</i> | 52  | 374  | 425  |
| LbrM30_V2.1060 | <i>L. braziliensis</i> | 53  | 729  | 781  |
| LbrM30_V2.1070 | <i>L. braziliensis</i> | 221 | 1    | 221  |

|                |                        |     |      |      |
|----------------|------------------------|-----|------|------|
| LbrM30_V2.1080 | <i>L. braziliensis</i> | 75  | 1    | 75   |
| LbrM30_V2.1080 | <i>L. braziliensis</i> | 163 | 89   | 251  |
| LbrM30_V2.1080 | <i>L. braziliensis</i> | 59  | 316  | 374  |
| LbrM30_V2.1090 | <i>L. braziliensis</i> | 55  | 1    | 55   |
| LbrM30_V2.1100 | <i>L. braziliensis</i> | 66  | 312  | 377  |
| LbrM30_V2.1110 | <i>L. braziliensis</i> | 119 | 1    | 119  |
| LbrM30_V2.1110 | <i>L. braziliensis</i> | 141 | 181  | 321  |
| LbrM30_V2.1110 | <i>L. braziliensis</i> | 50  | 376  | 425  |
| LbrM30_V2.1120 | <i>L. braziliensis</i> | 55  | 126  | 180  |
| LbrM30_V2.1120 | <i>L. braziliensis</i> | 62  | 241  | 302  |
| LbrM30_V2.1120 | <i>L. braziliensis</i> | 50  | 440  | 489  |
| LbrM30_V2.1120 | <i>L. braziliensis</i> | 54  | 529  | 582  |
| LbrM30_V2.1130 | <i>L. braziliensis</i> | 79  | 711  | 789  |
| LbrM30_V2.1140 | <i>L. braziliensis</i> | 68  | 1    | 68   |
| LbrM30_V2.1140 | <i>L. braziliensis</i> | 148 | 230  | 377  |
| LbrM30_V2.1150 | <i>L. braziliensis</i> | 97  | 12   | 108  |
| LbrM30_V2.1150 | <i>L. braziliensis</i> | 80  | 113  | 192  |
| LbrM30_V2.1150 | <i>L. braziliensis</i> | 70  | 200  | 269  |
| LbrM30_V2.1180 | <i>L. braziliensis</i> | 66  | 1    | 66   |
| LbrM30_V2.1180 | <i>L. braziliensis</i> | 40  | 164  | 203  |
| LbrM30_V2.1180 | <i>L. braziliensis</i> | 40  | 164  | 203  |
| LbrM30_V2.1190 | <i>L. braziliensis</i> | 77  | 64   | 140  |
| LbrM30_V2.1210 | <i>L. braziliensis</i> | 91  | 154  | 244  |
| LbrM30_V2.1210 | <i>L. braziliensis</i> | 53  | 282  | 334  |
| LbrM30_V2.1210 | <i>L. braziliensis</i> | 111 | 503  | 613  |
| LbrM30_V2.1210 | <i>L. braziliensis</i> | 185 | 625  | 809  |
| LbrM30_V2.1210 | <i>L. braziliensis</i> | 178 | 817  | 994  |
| LbrM30_V2.1230 | <i>L. braziliensis</i> | 79  | 77   | 155  |
| LbrM30_V2.1230 | <i>L. braziliensis</i> | 44  | 571  | 614  |
| LbrM30_V2.1240 | <i>L. braziliensis</i> | 53  | 1    | 53   |
| LbrM30_V2.1270 | <i>L. braziliensis</i> | 226 | 1    | 226  |
| LbrM30_V2.1270 | <i>L. braziliensis</i> | 118 | 357  | 474  |
| LbrM30_V2.1270 | <i>L. braziliensis</i> | 86  | 526  | 611  |
| LbrM30_V2.1270 | <i>L. braziliensis</i> | 70  | 812  | 881  |
| LbrM30_V2.1280 | <i>L. braziliensis</i> | 314 | 1    | 314  |
| LbrM30_V2.1280 | <i>L. braziliensis</i> | 127 | 444  | 570  |
| LbrM30_V2.1280 | <i>L. braziliensis</i> | 55  | 675  | 729  |
| LbrM30_V2.1280 | <i>L. braziliensis</i> | 42  | 748  | 789  |
| LbrM30_V2.1280 | <i>L. braziliensis</i> | 43  | 920  | 962  |
| LbrM30_V2.1280 | <i>L. braziliensis</i> | 156 | 1121 | 1276 |
| LbrM30_V2.1280 | <i>L. braziliensis</i> | 55  | 1467 | 1521 |
| LbrM30_V2.1280 | <i>L. braziliensis</i> | 115 | 1548 | 1662 |
| LbrM30_V2.1290 | <i>L. braziliensis</i> | 196 | 1    | 196  |
| LbrM30_V2.1290 | <i>L. braziliensis</i> | 52  | 209  | 260  |
| LbrM30_V2.1290 | <i>L. braziliensis</i> | 42  | 714  | 755  |
| LbrM30_V2.1320 | <i>L. braziliensis</i> | 97  | 44   | 140  |
| LbrM30_V2.1320 | <i>L. braziliensis</i> | 94  | 249  | 342  |

|                |                        |     |      |      |
|----------------|------------------------|-----|------|------|
| LbrM30_V2.1320 | <i>L. braziliensis</i> | 65  | 410  | 474  |
| LbrM30_V2.1320 | <i>L. braziliensis</i> | 40  | 675  | 714  |
| LbrM30_V2.1320 | <i>L. braziliensis</i> | 123 | 820  | 942  |
| LbrM30_V2.1340 | <i>L. braziliensis</i> | 142 | 1    | 142  |
| LbrM30_V2.1340 | <i>L. braziliensis</i> | 96  | 180  | 275  |
| LbrM30_V2.1340 | <i>L. braziliensis</i> | 72  | 559  | 630  |
| LbrM30_V2.1340 | <i>L. braziliensis</i> | 42  | 676  | 717  |
| LbrM30_V2.1340 | <i>L. braziliensis</i> | 184 | 763  | 946  |
| LbrM30_V2.1350 | <i>L. braziliensis</i> | 62  | 400  | 461  |
| LbrM30_V2.1350 | <i>L. braziliensis</i> | 162 | 522  | 683  |
| LbrM30_V2.1380 | <i>L. braziliensis</i> | 47  | 108  | 154  |
| LbrM30_V2.1380 | <i>L. braziliensis</i> | 45  | 271  | 315  |
| LbrM30_V2.1390 | <i>L. braziliensis</i> | 149 | 275  | 423  |
| LbrM30_V2.1390 | <i>L. braziliensis</i> | 51  | 1372 | 1422 |
| LbrM30_V2.1390 | <i>L. braziliensis</i> | 83  | 1537 | 1619 |
| LbrM30_V2.1400 | <i>L. braziliensis</i> | 78  | 184  | 261  |
| LbrM30_V2.1400 | <i>L. braziliensis</i> | 183 | 302  | 484  |
| LbrM30_V2.1400 | <i>L. braziliensis</i> | 111 | 508  | 618  |
| LbrM30_V2.1400 | <i>L. braziliensis</i> | 47  | 646  | 692  |
| LbrM30_V2.1410 | <i>L. braziliensis</i> | 218 | 1    | 218  |
| LbrM30_V2.1410 | <i>L. braziliensis</i> | 72  | 468  | 539  |
| LbrM30_V2.1410 | <i>L. braziliensis</i> | 105 | 844  | 948  |
| LbrM30_V2.1410 | <i>L. braziliensis</i> | 48  | 1013 | 1060 |
| LbrM30_V2.1410 | <i>L. braziliensis</i> | 46  | 1258 | 1303 |
| LbrM30_V2.1420 | <i>L. braziliensis</i> | 82  | 1    | 82   |
| LbrM30_V2.1430 | <i>L. braziliensis</i> | 41  | 186  | 226  |
| LbrM30_V2.1430 | <i>L. braziliensis</i> | 104 | 530  | 633  |
| LbrM30_V2.1430 | <i>L. braziliensis</i> | 84  | 895  | 978  |
| LbrM30_V2.1430 | <i>L. braziliensis</i> | 120 | 1008 | 1127 |
| LbrM30_V2.1430 | <i>L. braziliensis</i> | 87  | 1149 | 1235 |
| LbrM30_V2.1440 | <i>L. braziliensis</i> | 461 | 1    | 461  |
| LbrM30_V2.1440 | <i>L. braziliensis</i> | 148 | 542  | 689  |
| LbrM30_V2.1440 | <i>L. braziliensis</i> | 116 | 691  | 806  |
| LbrM30_V2.1440 | <i>L. braziliensis</i> | 92  | 867  | 958  |
| LbrM30_V2.1440 | <i>L. braziliensis</i> | 100 | 969  | 1068 |
| LbrM30_V2.1440 | <i>L. braziliensis</i> | 61  | 1102 | 1162 |
| LbrM30_V2.1440 | <i>L. braziliensis</i> | 52  | 1312 | 1363 |
| LbrM30_V2.1440 | <i>L. braziliensis</i> | 183 | 1424 | 1606 |
| LbrM30_V2.1440 | <i>L. braziliensis</i> | 71  | 1617 | 1687 |
| LbrM30_V2.1440 | <i>L. braziliensis</i> | 236 | 1789 | 2024 |
| LbrM30_V2.1440 | <i>L. braziliensis</i> | 84  | 2044 | 2127 |
| LbrM30_V2.1450 | <i>L. braziliensis</i> | 46  | 148  | 193  |
| LbrM30_V2.1460 | <i>L. braziliensis</i> | 198 | 121  | 318  |
| LbrM30_V2.1470 | <i>L. braziliensis</i> | 163 | 15   | 177  |
| LbrM30_V2.1470 | <i>L. braziliensis</i> | 200 | 268  | 467  |
| LbrM30_V2.1480 | <i>L. braziliensis</i> | 177 | 310  | 486  |
| LbrM30_V2.1490 | <i>L. braziliensis</i> | 169 | 12   | 180  |

|                |                        |     |      |      |
|----------------|------------------------|-----|------|------|
| LbrM30_V2.1490 | <i>L. braziliensis</i> | 45  | 275  | 319  |
| LbrM30_V2.1490 | <i>L. braziliensis</i> | 182 | 327  | 508  |
| LbrM30_V2.1490 | <i>L. braziliensis</i> | 155 | 511  | 665  |
| LbrM30_V2.1510 | <i>L. braziliensis</i> | 150 | 1    | 150  |
| LbrM30_V2.1520 | <i>L. braziliensis</i> | 46  | 1    | 46   |
| LbrM30_V2.1530 | <i>L. braziliensis</i> | 51  | 1    | 51   |
| LbrM30_V2.1540 | <i>L. braziliensis</i> | 117 | 42   | 158  |
| LbrM30_V2.1550 | <i>L. braziliensis</i> | 198 | 411  | 608  |
| LbrM30_V2.1550 | <i>L. braziliensis</i> | 274 | 667  | 940  |
| LbrM30_V2.1570 | <i>L. braziliensis</i> | 74  | 155  | 228  |
| LbrM30_V2.1570 | <i>L. braziliensis</i> | 58  | 395  | 452  |
| LbrM30_V2.1570 | <i>L. braziliensis</i> | 58  | 395  | 452  |
| LbrM30_V2.1580 | <i>L. braziliensis</i> | 51  | 130  | 180  |
| LbrM30_V2.1580 | <i>L. braziliensis</i> | 54  | 320  | 373  |
| LbrM30_V2.1580 | <i>L. braziliensis</i> | 147 | 461  | 607  |
| LbrM30_V2.1580 | <i>L. braziliensis</i> | 44  | 819  | 862  |
| LbrM30_V2.1580 | <i>L. braziliensis</i> | 100 | 919  | 1018 |
| LbrM30_V2.1590 | <i>L. braziliensis</i> | 42  | 196  | 237  |
| LbrM30_V2.1590 | <i>L. braziliensis</i> | 83  | 293  | 375  |
| LbrM30_V2.1610 | <i>L. braziliensis</i> | 104 | 396  | 499  |
| LbrM30_V2.1620 | <i>L. braziliensis</i> | 118 | 56   | 173  |
| LbrM30_V2.1620 | <i>L. braziliensis</i> | 93  | 182  | 274  |
| LbrM30_V2.1620 | <i>L. braziliensis</i> | 44  | 337  | 380  |
| LbrM30_V2.1620 | <i>L. braziliensis</i> | 98  | 438  | 535  |
| LbrM30_V2.1620 | <i>L. braziliensis</i> | 128 | 560  | 687  |
| LbrM30_V2.1620 | <i>L. braziliensis</i> | 70  | 870  | 939  |
| LbrM30_V2.1620 | <i>L. braziliensis</i> | 243 | 1036 | 1278 |
| LbrM30_V2.1620 | <i>L. braziliensis</i> | 113 | 1359 | 1471 |
| LbrM30_V2.1620 | <i>L. braziliensis</i> | 52  | 1496 | 1547 |
| LbrM30_V2.1630 | <i>L. braziliensis</i> | 43  | 64   | 106  |
| LbrM30_V2.1640 | <i>L. braziliensis</i> | 56  | 158  | 213  |
| LbrM30_V2.1650 | <i>L. braziliensis</i> | 47  | 104  | 150  |
| LbrM30_V2.1660 | <i>L. braziliensis</i> | 41  | 41   | 81   |
| LbrM30_V2.1660 | <i>L. braziliensis</i> | 56  | 263  | 318  |
| LbrM30_V2.1660 | <i>L. braziliensis</i> | 109 | 374  | 482  |
| LbrM30_V2.1670 | <i>L. braziliensis</i> | 55  | 190  | 244  |
| LbrM30_V2.1670 | <i>L. braziliensis</i> | 154 | 895  | 1048 |
| LbrM30_V2.1680 | <i>L. braziliensis</i> | 134 | 18   | 151  |
| LbrM30_V2.1680 | <i>L. braziliensis</i> | 49  | 510  | 558  |
| LbrM30_V2.1680 | <i>L. braziliensis</i> | 87  | 610  | 696  |
| LbrM30_V2.1710 | <i>L. braziliensis</i> | 59  | 33   | 91   |
| LbrM30_V2.1710 | <i>L. braziliensis</i> | 55  | 115  | 169  |
| LbrM30_V2.1710 | <i>L. braziliensis</i> | 55  | 115  | 169  |
| LbrM30_V2.1730 | <i>L. braziliensis</i> | 72  | 86   | 157  |
| LbrM30_V2.1730 | <i>L. braziliensis</i> | 62  | 190  | 251  |
| LbrM30_V2.1730 | <i>L. braziliensis</i> | 59  | 278  | 336  |
| LbrM30_V2.1740 | <i>L. braziliensis</i> | 79  | 46   | 124  |

|                |                        |     |      |      |
|----------------|------------------------|-----|------|------|
| LbrM30_V2.1740 | <i>L. braziliensis</i> | 95  | 193  | 287  |
| LbrM30_V2.1740 | <i>L. braziliensis</i> | 40  | 600  | 639  |
| LbrM30_V2.1740 | <i>L. braziliensis</i> | 79  | 657  | 735  |
| LbrM30_V2.1770 | <i>L. braziliensis</i> | 66  | 1    | 66   |
| LbrM30_V2.1770 | <i>L. braziliensis</i> | 140 | 106  | 245  |
| LbrM30_V2.1770 | <i>L. braziliensis</i> | 130 | 262  | 391  |
| LbrM30_V2.1800 | <i>L. braziliensis</i> | 174 | 388  | 561  |
| LbrM30_V2.1800 | <i>L. braziliensis</i> | 135 | 775  | 909  |
| LbrM30_V2.1800 | <i>L. braziliensis</i> | 188 | 1121 | 1308 |
| LbrM30_V2.1800 | <i>L. braziliensis</i> | 193 | 1561 | 1753 |
| LbrM30_V2.1820 | <i>L. braziliensis</i> | 53  | 69   | 121  |
| LbrM30_V2.1820 | <i>L. braziliensis</i> | 141 | 157  | 297  |
| LbrM30_V2.1820 | <i>L. braziliensis</i> | 502 | 309  | 810  |
| LbrM30_V2.1820 | <i>L. braziliensis</i> | 144 | 830  | 973  |
| LbrM30_V2.1850 | <i>L. braziliensis</i> | 83  | 356  | 438  |
| LbrM30_V2.1850 | <i>L. braziliensis</i> | 107 | 513  | 619  |
| LbrM30_V2.1850 | <i>L. braziliensis</i> | 79  | 683  | 761  |
| LbrM30_V2.1860 | <i>L. braziliensis</i> | 57  | 1    | 57   |
| LbrM30_V2.1860 | <i>L. braziliensis</i> | 50  | 133  | 182  |
| LbrM30_V2.1860 | <i>L. braziliensis</i> | 86  | 263  | 348  |
| LbrM30_V2.1860 | <i>L. braziliensis</i> | 61  | 537  | 597  |
| LbrM30_V2.1880 | <i>L. braziliensis</i> | 46  | 35   | 80   |
| LbrM30_V2.1880 | <i>L. braziliensis</i> | 114 | 136  | 249  |
| LbrM30_V2.1880 | <i>L. braziliensis</i> | 111 | 298  | 408  |
| LbrM30_V2.1880 | <i>L. braziliensis</i> | 104 | 653  | 756  |
| LbrM30_V2.1880 | <i>L. braziliensis</i> | 383 | 789  | 1171 |
| LbrM30_V2.1890 | <i>L. braziliensis</i> | 83  | 132  | 214  |
| LbrM30_V2.1890 | <i>L. braziliensis</i> | 44  | 319  | 362  |
| LbrM30_V2.1890 | <i>L. braziliensis</i> | 44  | 319  | 362  |
| LbrM30_V2.1900 | <i>L. braziliensis</i> | 52  | 100  | 151  |
| LbrM30_V2.1900 | <i>L. braziliensis</i> | 120 | 262  | 381  |
| LbrM30_V2.1900 | <i>L. braziliensis</i> | 120 | 262  | 381  |
| LbrM30_V2.1910 | <i>L. braziliensis</i> | 88  | 112  | 199  |
| LbrM30_V2.1910 | <i>L. braziliensis</i> | 185 | 226  | 410  |
| LbrM30_V2.1910 | <i>L. braziliensis</i> | 185 | 226  | 410  |
| LbrM30_V2.1920 | <i>L. braziliensis</i> | 49  | 138  | 186  |
| LbrM30_V2.1940 | <i>L. braziliensis</i> | 56  | 54   | 109  |
| LbrM30_V2.1940 | <i>L. braziliensis</i> | 79  | 277  | 355  |
| LbrM30_V2.1940 | <i>L. braziliensis</i> | 42  | 547  | 588  |
| LbrM30_V2.1940 | <i>L. braziliensis</i> | 44  | 627  | 670  |
| LbrM30_V2.1940 | <i>L. braziliensis</i> | 59  | 899  | 957  |
| LbrM30_V2.1950 | <i>L. braziliensis</i> | 56  | 74   | 129  |
| LbrM30_V2.1980 | <i>L. braziliensis</i> | 63  | 151  | 213  |
| LbrM30_V2.1980 | <i>L. braziliensis</i> | 68  | 717  | 784  |
| LbrM30_V2.1980 | <i>L. braziliensis</i> | 47  | 1050 | 1096 |
| LbrM30_V2.2000 | <i>L. braziliensis</i> | 50  | 124  | 173  |
| LbrM30_V2.2000 | <i>L. braziliensis</i> | 55  | 235  | 289  |

|                |                        |     |      |      |
|----------------|------------------------|-----|------|------|
| LbrM30_V2.2000 | <i>L. braziliensis</i> | 91  | 536  | 626  |
| LbrM30_V2.2000 | <i>L. braziliensis</i> | 249 | 844  | 1092 |
| LbrM30_V2.2010 | <i>L. braziliensis</i> | 240 | 1    | 240  |
| LbrM30_V2.2020 | <i>L. braziliensis</i> | 89  | 120  | 208  |
| LbrM30_V2.2030 | <i>L. braziliensis</i> | 54  | 1    | 54   |
| LbrM30_V2.2030 | <i>L. braziliensis</i> | 113 | 439  | 551  |
| LbrM30_V2.2030 | <i>L. braziliensis</i> | 113 | 439  | 551  |
| LbrM30_V2.2050 | <i>L. braziliensis</i> | 87  | 235  | 321  |
| LbrM30_V2.2050 | <i>L. braziliensis</i> | 59  | 536  | 594  |
| LbrM30_V2.2050 | <i>L. braziliensis</i> | 59  | 670  | 728  |
| LbrM30_V2.2060 | <i>L. braziliensis</i> | 46  | 152  | 197  |
| LbrM30_V2.2080 | <i>L. braziliensis</i> | 70  | 80   | 149  |
| LbrM30_V2.2080 | <i>L. braziliensis</i> | 120 | 418  | 537  |
| LbrM30_V2.2080 | <i>L. braziliensis</i> | 102 | 636  | 737  |
| LbrM30_V2.2090 | <i>L. braziliensis</i> | 70  | 116  | 185  |
| LbrM30_V2.2090 | <i>L. braziliensis</i> | 53  | 208  | 260  |
| LbrM30_V2.2090 | <i>L. braziliensis</i> | 108 | 290  | 397  |
| LbrM30_V2.2100 | <i>L. braziliensis</i> | 73  | 394  | 466  |
| LbrM30_V2.2110 | <i>L. braziliensis</i> | 57  | 420  | 476  |
| LbrM30_V2.2110 | <i>L. braziliensis</i> | 114 | 505  | 618  |
| LbrM30_V2.2120 | <i>L. braziliensis</i> | 48  | 1    | 48   |
| LbrM30_V2.2130 | <i>L. braziliensis</i> | 320 | 173  | 492  |
| LbrM30_V2.2140 | <i>L. braziliensis</i> | 209 | 172  | 380  |
| LbrM30_V2.2150 | <i>L. braziliensis</i> | 87  | 62   | 148  |
| LbrM30_V2.2160 | <i>L. braziliensis</i> | 40  | 749  | 788  |
| LbrM30_V2.2160 | <i>L. braziliensis</i> | 53  | 1839 | 1891 |
| LbrM30_V2.2160 | <i>L. braziliensis</i> | 44  | 2401 | 2444 |
| LbrM30_V2.2170 | <i>L. braziliensis</i> | 108 | 1    | 108  |
| LbrM30_V2.2170 | <i>L. braziliensis</i> | 78  | 138  | 215  |
| LbrM30_V2.2170 | <i>L. braziliensis</i> | 60  | 271  | 330  |
| LbrM30_V2.2180 | <i>L. braziliensis</i> | 70  | 74   | 143  |
| LbrM30_V2.2200 | <i>L. braziliensis</i> | 74  | 81   | 154  |
| LbrM30_V2.2200 | <i>L. braziliensis</i> | 76  | 252  | 327  |
| LbrM30_V2.2200 | <i>L. braziliensis</i> | 76  | 252  | 327  |
| LbrM30_V2.2220 | <i>L. braziliensis</i> | 103 | 220  | 322  |
| LbrM30_V2.2220 | <i>L. braziliensis</i> | 53  | 512  | 564  |
| LbrM30_V2.2220 | <i>L. braziliensis</i> | 158 | 582  | 739  |
| LbrM30_V2.2220 | <i>L. braziliensis</i> | 44  | 804  | 847  |
| LbrM30_V2.2220 | <i>L. braziliensis</i> | 60  | 955  | 1014 |
| LbrM30_V2.2220 | <i>L. braziliensis</i> | 68  | 1579 | 1646 |
| LbrM30_V2.2220 | <i>L. braziliensis</i> | 43  | 1649 | 1691 |
| LbrM30_V2.2230 | <i>L. braziliensis</i> | 64  | 19   | 82   |
| LbrM30_V2.2230 | <i>L. braziliensis</i> | 49  | 341  | 389  |
| LbrM30_V2.2230 | <i>L. braziliensis</i> | 110 | 576  | 685  |
| LbrM30_V2.2240 | <i>L. braziliensis</i> | 109 | 1    | 109  |
| LbrM30_V2.2240 | <i>L. braziliensis</i> | 67  | 457  | 523  |
| LbrM30_V2.2240 | <i>L. braziliensis</i> | 46  | 714  | 759  |

|                |                        |     |      |      |
|----------------|------------------------|-----|------|------|
| LbrM30_V2.2250 | <i>L. braziliensis</i> | 41  | 116  | 156  |
| LbrM30_V2.2250 | <i>L. braziliensis</i> | 72  | 161  | 232  |
| LbrM30_V2.2250 | <i>L. braziliensis</i> | 52  | 386  | 437  |
| LbrM30_V2.2250 | <i>L. braziliensis</i> | 77  | 517  | 593  |
| LbrM30_V2.2250 | <i>L. braziliensis</i> | 135 | 860  | 994  |
| LbrM30_V2.2250 | <i>L. braziliensis</i> | 112 | 1036 | 1147 |
| LbrM30_V2.2250 | <i>L. braziliensis</i> | 62  | 1248 | 1309 |
| LbrM30_V2.2260 | <i>L. braziliensis</i> | 43  | 1    | 43   |
| LbrM30_V2.2280 | <i>L. braziliensis</i> | 49  | 245  | 293  |
| LbrM30_V2.2290 | <i>L. braziliensis</i> | 93  | 77   | 169  |
| LbrM30_V2.2290 | <i>L. braziliensis</i> | 56  | 180  | 235  |
| LbrM30_V2.2290 | <i>L. braziliensis</i> | 141 | 280  | 420  |
| LbrM30_V2.2290 | <i>L. braziliensis</i> | 131 | 442  | 572  |
| LbrM30_V2.2290 | <i>L. braziliensis</i> | 133 | 612  | 744  |
| LbrM30_V2.2290 | <i>L. braziliensis</i> | 268 | 764  | 1031 |
| LbrM30_V2.2290 | <i>L. braziliensis</i> | 111 | 1067 | 1177 |
| LbrM30_V2.2330 | <i>L. braziliensis</i> | 154 | 12   | 165  |
| LbrM30_V2.2330 | <i>L. braziliensis</i> | 44  | 202  | 245  |
| LbrM30_V2.2330 | <i>L. braziliensis</i> | 44  | 202  | 245  |
| LbrM30_V2.2340 | <i>L. braziliensis</i> | 50  | 266  | 315  |
| LbrM30_V2.2340 | <i>L. braziliensis</i> | 162 | 843  | 1004 |
| LbrM30_V2.2340 | <i>L. braziliensis</i> | 50  | 1032 | 1081 |
| LbrM30_V2.2340 | <i>L. braziliensis</i> | 64  | 1250 | 1313 |
| LbrM30_V2.2340 | <i>L. braziliensis</i> | 87  | 1447 | 1533 |
| LbrM30_V2.2340 | <i>L. braziliensis</i> | 90  | 2159 | 2248 |
| LbrM30_V2.2340 | <i>L. braziliensis</i> | 40  | 2510 | 2549 |
| LbrM30_V2.2340 | <i>L. braziliensis</i> | 41  | 2602 | 2642 |
| LbrM30_V2.2340 | <i>L. braziliensis</i> | 51  | 2674 | 2724 |
| LbrM30_V2.2340 | <i>L. braziliensis</i> | 92  | 2908 | 2999 |
| LbrM30_V2.2380 | <i>L. braziliensis</i> | 60  | 269  | 328  |
| LbrM30_V2.2380 | <i>L. braziliensis</i> | 891 | 334  | 1224 |
| LbrM30_V2.2390 | <i>L. braziliensis</i> | 41  | 131  | 171  |
| LbrM30_V2.2390 | <i>L. braziliensis</i> | 90  | 386  | 475  |
| LbrM30_V2.2390 | <i>L. braziliensis</i> | 57  | 515  | 571  |
| LbrM30_V2.2390 | <i>L. braziliensis</i> | 71  | 668  | 738  |
| LbrM30_V2.2400 | <i>L. braziliensis</i> | 93  | 70   | 162  |
| LbrM30_V2.2410 | <i>L. braziliensis</i> | 90  | 210  | 299  |
| LbrM30_V2.2420 | <i>L. braziliensis</i> | 138 | 514  | 651  |
| LbrM30_V2.2430 | <i>L. braziliensis</i> | 126 | 231  | 356  |
| LbrM30_V2.2440 | <i>L. braziliensis</i> | 145 | 514  | 658  |
| LbrM30_V2.2490 | <i>L. braziliensis</i> | 186 | 1    | 186  |
| LbrM30_V2.2490 | <i>L. braziliensis</i> | 46  | 436  | 481  |
| LbrM30_V2.2510 | <i>L. braziliensis</i> | 193 | 20   | 212  |
| LbrM30_V2.2510 | <i>L. braziliensis</i> | 81  | 324  | 404  |
| LbrM30_V2.2510 | <i>L. braziliensis</i> | 44  | 504  | 547  |
| LbrM30_V2.2510 | <i>L. braziliensis</i> | 72  | 635  | 706  |
| LbrM30_V2.2520 | <i>L. braziliensis</i> | 85  | 104  | 188  |

|                |                        |     |      |      |
|----------------|------------------------|-----|------|------|
| LbrM30_V2.2520 | <i>L. braziliensis</i> | 49  | 338  | 386  |
| LbrM30_V2.2520 | <i>L. braziliensis</i> | 49  | 338  | 386  |
| LbrM30_V2.2560 | <i>L. braziliensis</i> | 75  | 1    | 75   |
| LbrM30_V2.2560 | <i>L. braziliensis</i> | 64  | 151  | 214  |
| LbrM30_V2.2570 | <i>L. braziliensis</i> | 370 | 1    | 370  |
| LbrM30_V2.2570 | <i>L. braziliensis</i> | 112 | 601  | 712  |
| LbrM30_V2.2600 | <i>L. braziliensis</i> | 84  | 171  | 254  |
| LbrM30_V2.2600 | <i>L. braziliensis</i> | 343 | 486  | 828  |
| LbrM30_V2.2630 | <i>L. braziliensis</i> | 53  | 57   | 109  |
| LbrM30_V2.2650 | <i>L. braziliensis</i> | 113 | 58   | 170  |
| LbrM30_V2.2650 | <i>L. braziliensis</i> | 104 | 191  | 294  |
| LbrM30_V2.2670 | <i>L. braziliensis</i> | 548 | 17   | 564  |
| LbrM30_V2.2670 | <i>L. braziliensis</i> | 61  | 596  | 656  |
| LbrM30_V2.2670 | <i>L. braziliensis</i> | 192 | 707  | 898  |
| LbrM30_V2.2680 | <i>L. braziliensis</i> | 159 | 139  | 297  |
| LbrM30_V2.2680 | <i>L. braziliensis</i> | 55  | 501  | 555  |
| LbrM30_V2.2690 | <i>L. braziliensis</i> | 163 | 224  | 386  |
| LbrM30_V2.2700 | <i>L. braziliensis</i> | 102 | 43   | 144  |
| LbrM30_V2.2700 | <i>L. braziliensis</i> | 117 | 228  | 344  |
| LbrM30_V2.2700 | <i>L. braziliensis</i> | 117 | 228  | 344  |
| LbrM30_V2.2710 | <i>L. braziliensis</i> | 56  | 179  | 234  |
| LbrM30_V2.2750 | <i>L. braziliensis</i> | 97  | 99   | 195  |
| LbrM30_V2.2750 | <i>L. braziliensis</i> | 59  | 226  | 284  |
| LbrM30_V2.2750 | <i>L. braziliensis</i> | 44  | 322  | 365  |
| LbrM30_V2.2750 | <i>L. braziliensis</i> | 77  | 392  | 468  |
| LbrM30_V2.2760 | <i>L. braziliensis</i> | 75  | 1    | 75   |
| LbrM30_V2.2770 | <i>L. braziliensis</i> | 95  | 17   | 111  |
| LbrM30_V2.2800 | <i>L. braziliensis</i> | 564 | 1    | 564  |
| LbrM30_V2.2800 | <i>L. braziliensis</i> | 196 | 575  | 770  |
| LbrM30_V2.2840 | <i>L. braziliensis</i> | 61  | 72   | 132  |
| LbrM30_V2.2850 | <i>L. braziliensis</i> | 44  | 103  | 146  |
| LbrM30_V2.2850 | <i>L. braziliensis</i> | 58  | 218  | 275  |
| LbrM30_V2.2850 | <i>L. braziliensis</i> | 104 | 383  | 486  |
| LbrM30_V2.2860 | <i>L. braziliensis</i> | 83  | 37   | 119  |
| LbrM30_V2.2870 | <i>L. braziliensis</i> | 51  | 408  | 458  |
| LbrM30_V2.2900 | <i>L. braziliensis</i> | 359 | 283  | 641  |
| LbrM30_V2.2940 | <i>L. braziliensis</i> | 50  | 135  | 184  |
| LbrM30_V2.2980 | <i>L. braziliensis</i> | 253 | 155  | 407  |
| LbrM30_V2.3000 | <i>L. braziliensis</i> | 122 | 201  | 322  |
| LbrM30_V2.3020 | <i>L. braziliensis</i> | 77  | 185  | 261  |
| LbrM30_V2.3020 | <i>L. braziliensis</i> | 61  | 391  | 451  |
| LbrM30_V2.3030 | <i>L. braziliensis</i> | 87  | 51   | 137  |
| LbrM30_V2.3040 | <i>L. braziliensis</i> | 44  | 1512 | 1555 |
| LbrM30_V2.3040 | <i>L. braziliensis</i> | 65  | 1815 | 1879 |
| LbrM30_V2.3040 | <i>L. braziliensis</i> | 65  | 1815 | 1879 |
| LbrM30_V2.3050 | <i>L. braziliensis</i> | 79  | 1    | 79   |
| LbrM30_V2.3050 | <i>L. braziliensis</i> | 133 | 431  | 563  |



|                |                        |     |      |      |
|----------------|------------------------|-----|------|------|
| LbrM30_V2.3050 | <i>L. braziliensis</i> | 255 | 638  | 892  |
| LbrM30_V2.3050 | <i>L. braziliensis</i> | 42  | 929  | 970  |
| LbrM30_V2.3050 | <i>L. braziliensis</i> | 43  | 994  | 1036 |
| LbrM30_V2.3050 | <i>L. braziliensis</i> | 125 | 1067 | 1191 |
| LbrM30_V2.3060 | <i>L. braziliensis</i> | 119 | 1    | 119  |
| LbrM30_V2.3060 | <i>L. braziliensis</i> | 65  | 318  | 382  |
| LbrM30_V2.3080 | <i>L. braziliensis</i> | 146 | 132  | 277  |
| LbrM30_V2.3090 | <i>L. braziliensis</i> | 57  | 268  | 324  |
| LbrM30_V2.3130 | <i>L. braziliensis</i> | 108 | 1    | 108  |
| LbrM30_V2.3160 | <i>L. braziliensis</i> | 384 | 1    | 384  |
| LbrM30_V2.3190 | <i>L. braziliensis</i> | 63  | 44   | 106  |
| LbrM30_V2.3190 | <i>L. braziliensis</i> | 44  | 281  | 324  |
| LbrM30_V2.3190 | <i>L. braziliensis</i> | 89  | 369  | 457  |
| LbrM30_V2.3190 | <i>L. braziliensis</i> | 177 | 668  | 844  |
| LbrM30_V2.3190 | <i>L. braziliensis</i> | 111 | 1024 | 1134 |
| LbrM30_V2.3190 | <i>L. braziliensis</i> | 40  | 1351 | 1390 |
| LbrM30_V2.3190 | <i>L. braziliensis</i> | 58  | 1925 | 1982 |
| LbrM30_V2.3200 | <i>L. braziliensis</i> | 171 | 201  | 371  |
| LbrM30_V2.3200 | <i>L. braziliensis</i> | 111 | 551  | 661  |
| LbrM30_V2.3200 | <i>L. braziliensis</i> | 56  | 1454 | 1509 |
| LbrM30_V2.3210 | <i>L. braziliensis</i> | 203 | 1    | 203  |
| LbrM30_V2.3210 | <i>L. braziliensis</i> | 111 | 383  | 493  |
| LbrM30_V2.3210 | <i>L. braziliensis</i> | 40  | 710  | 749  |
| LbrM30_V2.3210 | <i>L. braziliensis</i> | 58  | 1285 | 1342 |
| LbrM30_V2.3220 | <i>L. braziliensis</i> | 84  | 1    | 84   |
| LbrM30_V2.3220 | <i>L. braziliensis</i> | 162 | 98   | 259  |
| LbrM30_V2.3220 | <i>L. braziliensis</i> | 58  | 771  | 828  |
| LbrM30_V2.3240 | <i>L. braziliensis</i> | 107 | 303  | 409  |
| LbrM30_V2.3240 | <i>L. braziliensis</i> | 192 | 442  | 633  |
| LbrM30_V2.3240 | <i>L. braziliensis</i> | 153 | 729  | 881  |
| LbrM30_V2.3290 | <i>L. braziliensis</i> | 151 | 1    | 151  |
| LbrM30_V2.3290 | <i>L. braziliensis</i> | 124 | 446  | 569  |
| LbrM30_V2.3300 | <i>L. braziliensis</i> | 60  | 353  | 412  |
| LbrM30_V2.3330 | <i>L. braziliensis</i> | 44  | 128  | 171  |
| LbrM30_V2.3330 | <i>L. braziliensis</i> | 64  | 240  | 303  |
| LbrM30_V2.3330 | <i>L. braziliensis</i> | 97  | 466  | 562  |
| LbrM30_V2.3330 | <i>L. braziliensis</i> | 160 | 878  | 1037 |
| LbrM30_V2.3340 | <i>L. braziliensis</i> | 98  | 69   | 166  |
| LbrM30_V2.3340 | <i>L. braziliensis</i> | 52  | 218  | 269  |
| LbrM30_V2.3340 | <i>L. braziliensis</i> | 40  | 319  | 358  |
| LbrM30_V2.3360 | <i>L. braziliensis</i> | 58  | 1    | 58   |
| LbrM30_V2.3360 | <i>L. braziliensis</i> | 148 | 228  | 375  |
| LbrM30_V2.3370 | <i>L. braziliensis</i> | 186 | 60   | 245  |
| LbrM30_V2.3370 | <i>L. braziliensis</i> | 88  | 253  | 340  |
| LbrM30_V2.3400 | <i>L. braziliensis</i> | 132 | 509  | 640  |
| LbrM30_V2.3410 | <i>L. braziliensis</i> | 483 | 37   | 519  |
| LbrM30_V2.3420 | <i>L. braziliensis</i> | 58  | 174  | 231  |

|                |                        |     |     |      |
|----------------|------------------------|-----|-----|------|
| LbrM30_V2.3450 | <i>L. braziliensis</i> | 40  | 74  | 113  |
| LbrM30_V2.3450 | <i>L. braziliensis</i> | 101 | 231 | 331  |
| LbrM30_V2.3450 | <i>L. braziliensis</i> | 101 | 231 | 331  |
| LbrM30_V2.3460 | <i>L. braziliensis</i> | 63  | 1   | 63   |
| LbrM30_V2.3460 | <i>L. braziliensis</i> | 67  | 226 | 292  |
| LbrM30_V2.3460 | <i>L. braziliensis</i> | 125 | 316 | 440  |
| LbrM30_V2.3470 | <i>L. braziliensis</i> | 54  | 746 | 799  |
| LbrM30_V2.3480 | <i>L. braziliensis</i> | 65  | 10  | 74   |
| LbrM30_V2.3480 | <i>L. braziliensis</i> | 46  | 217 | 262  |
| LbrM30_V2.3490 | <i>L. braziliensis</i> | 51  | 1   | 51   |
| LbrM30_V2.3520 | <i>L. braziliensis</i> | 70  | 322 | 391  |
| LbrM30_V2.3530 | <i>L. braziliensis</i> | 103 | 63  | 165  |
| LbrM30_V2.3540 | <i>L. braziliensis</i> | 207 | 29  | 235  |
| LbrM30_V2.3570 | <i>L. braziliensis</i> | 64  | 78  | 141  |
| LbrM30_V2.3570 | <i>L. braziliensis</i> | 48  | 179 | 226  |
| LbrM30_V2.3570 | <i>L. braziliensis</i> | 48  | 179 | 226  |
| LbrM30_V2.3580 | <i>L. braziliensis</i> | 84  | 277 | 360  |
| LbrM30_V2.3600 | <i>L. braziliensis</i> | 46  | 1   | 46   |
| LbrM30_V2.3600 | <i>L. braziliensis</i> | 51  | 88  | 138  |
| LbrM30_V2.3600 | <i>L. braziliensis</i> | 55  | 160 | 214  |
| LbrM30_V2.3600 | <i>L. braziliensis</i> | 50  | 218 | 267  |
| LbrM30_V2.3610 | <i>L. braziliensis</i> | 141 | 1   | 141  |
| LbrM30_V2.3610 | <i>L. braziliensis</i> | 85  | 296 | 380  |
| LbrM30_V2.3610 | <i>L. braziliensis</i> | 64  | 553 | 616  |
| LbrM30_V2.3610 | <i>L. braziliensis</i> | 85  | 658 | 742  |
| LbrM30_V2.3620 | <i>L. braziliensis</i> | 49  | 96  | 144  |
| LbrM30_V2.3650 | <i>L. braziliensis</i> | 196 | 1   | 196  |
| LbrM30_V2.3650 | <i>L. braziliensis</i> | 114 | 202 | 315  |
| LbrM30_V2.3680 | <i>L. braziliensis</i> | 62  | 39  | 100  |
| LbrM30_V2.3680 | <i>L. braziliensis</i> | 47  | 158 | 204  |
| LbrM30_V2.3680 | <i>L. braziliensis</i> | 47  | 158 | 204  |
| LbrM30_V2.3710 | <i>L. braziliensis</i> | 47  | 1   | 47   |
| LbrM30_V2.3710 | <i>L. braziliensis</i> | 77  | 366 | 442  |
| LbrM30_V2.3710 | <i>L. braziliensis</i> | 77  | 366 | 442  |
| LbrM30_V2.3720 | <i>L. braziliensis</i> | 76  | 68  | 143  |
| LbrM30_V2.3720 | <i>L. braziliensis</i> | 51  | 534 | 584  |
| LbrM30_V2.3720 | <i>L. braziliensis</i> | 51  | 534 | 584  |
| LbrM30_V2.3730 | <i>L. braziliensis</i> | 40  | 45  | 84   |
| LbrM30_V2.3740 | <i>L. braziliensis</i> | 74  | 1   | 74   |
| LbrM30_V2.3760 | <i>L. braziliensis</i> | 59  | 47  | 105  |
| LbrM30_V2.3770 | <i>L. braziliensis</i> | 92  | 131 | 222  |
| LbrM30_V2.3780 | <i>L. braziliensis</i> | 58  | 447 | 504  |
| LbrM30_V2.3790 | <i>L. braziliensis</i> | 58  | 1   | 58   |
| LbrM30_V2.3790 | <i>L. braziliensis</i> | 69  | 94  | 162  |
| LbrM30_V2.3790 | <i>L. braziliensis</i> | 161 | 258 | 418  |
| LbrM30_V2.3790 | <i>L. braziliensis</i> | 172 | 628 | 799  |
| LbrM30_V2.3790 | <i>L. braziliensis</i> | 110 | 981 | 1090 |

|                |                        |     |      |      |
|----------------|------------------------|-----|------|------|
| LbrM30_V2.3790 | <i>L. braziliensis</i> | 43  | 1303 | 1345 |
| LbrM30_V2.3790 | <i>L. braziliensis</i> | 58  | 1880 | 1937 |
| LbrM30_V2.3800 | <i>L. braziliensis</i> | 91  | 1    | 91   |
| LbrM30_V2.3800 | <i>L. braziliensis</i> | 121 | 243  | 363  |
| LbrM30_V2.3800 | <i>L. braziliensis</i> | 108 | 535  | 642  |
| LbrM30_V2.3800 | <i>L. braziliensis</i> | 58  | 1154 | 1211 |
| LbrM30_V2.3810 | <i>L. braziliensis</i> | 79  | 70   | 148  |
| LbrM30_V2.3810 | <i>L. braziliensis</i> | 40  | 175  | 214  |
| LbrM30_V2.3810 | <i>L. braziliensis</i> | 47  | 254  | 300  |
| LbrM30_V2.3810 | <i>L. braziliensis</i> | 90  | 339  | 428  |
| LbrM30_V2.3810 | <i>L. braziliensis</i> | 109 | 585  | 693  |
| LbrM31_V2.0030 | <i>L. braziliensis</i> | 64  | 952  | 1015 |
| LbrM31_V2.0040 | <i>L. braziliensis</i> | 61  | 12   | 72   |
| LbrM31_V2.0070 | <i>L. braziliensis</i> | 82  | 869  | 950  |
| LbrM31_V2.0080 | <i>L. braziliensis</i> | 126 | 1    | 126  |
| LbrM31_V2.0080 | <i>L. braziliensis</i> | 70  | 161  | 230  |
| LbrM31_V2.0090 | <i>L. braziliensis</i> | 47  | 305  | 351  |
| LbrM31_V2.0110 | <i>L. braziliensis</i> | 104 | 176  | 279  |
| LbrM31_V2.0120 | <i>L. braziliensis</i> | 48  | 1    | 48   |
| LbrM31_V2.0130 | <i>L. braziliensis</i> | 810 | 1    | 810  |
| LbrM31_V2.0140 | <i>L. braziliensis</i> | 59  | 66   | 124  |
| LbrM31_V2.0140 | <i>L. braziliensis</i> | 49  | 369  | 417  |
| LbrM31_V2.0140 | <i>L. braziliensis</i> | 49  | 369  | 417  |
| LbrM31_V2.0160 | <i>L. braziliensis</i> | 81  | 136  | 216  |
| LbrM31_V2.0160 | <i>L. braziliensis</i> | 125 | 237  | 361  |
| LbrM31_V2.0160 | <i>L. braziliensis</i> | 123 | 473  | 595  |
| LbrM31_V2.0180 | <i>L. braziliensis</i> | 148 | 198  | 345  |
| LbrM31_V2.0180 | <i>L. braziliensis</i> | 69  | 460  | 528  |
| LbrM31_V2.0180 | <i>L. braziliensis</i> | 195 | 569  | 763  |
| LbrM31_V2.0180 | <i>L. braziliensis</i> | 64  | 784  | 847  |
| LbrM31_V2.0180 | <i>L. braziliensis</i> | 49  | 1074 | 1122 |
| LbrM31_V2.0200 | <i>L. braziliensis</i> | 386 | 45   | 430  |
| LbrM31_V2.0210 | <i>L. braziliensis</i> | 79  | 161  | 239  |
| LbrM31_V2.0210 | <i>L. braziliensis</i> | 57  | 412  | 468  |
| LbrM31_V2.0210 | <i>L. braziliensis</i> | 92  | 494  | 585  |
| LbrM31_V2.0240 | <i>L. braziliensis</i> | 51  | 12   | 62   |
| LbrM31_V2.0240 | <i>L. braziliensis</i> | 77  | 66   | 142  |
| LbrM31_V2.0240 | <i>L. braziliensis</i> | 62  | 151  | 212  |
| LbrM31_V2.0240 | <i>L. braziliensis</i> | 54  | 238  | 291  |
| LbrM31_V2.0250 | <i>L. braziliensis</i> | 163 | 1    | 163  |
| LbrM31_V2.0260 | <i>L. braziliensis</i> | 114 | 238  | 351  |
| LbrM31_V2.0280 | <i>L. braziliensis</i> | 44  | 141  | 184  |
| LbrM31_V2.0280 | <i>L. braziliensis</i> | 44  | 467  | 510  |
| LbrM31_V2.0280 | <i>L. braziliensis</i> | 44  | 467  | 510  |
| LbrM31_V2.0300 | <i>L. braziliensis</i> | 212 | 1    | 212  |
| LbrM31_V2.0300 | <i>L. braziliensis</i> | 102 | 524  | 625  |
| LbrM31_V2.0330 | <i>L. braziliensis</i> | 118 | 1    | 118  |

|                |                        |     |      |      |
|----------------|------------------------|-----|------|------|
| LbrM31_V2.0340 | <i>L. braziliensis</i> | 185 | 14   | 198  |
| LbrM31_V2.0340 | <i>L. braziliensis</i> | 178 | 259  | 436  |
| LbrM31_V2.0340 | <i>L. braziliensis</i> | 186 | 456  | 641  |
| LbrM31_V2.0340 | <i>L. braziliensis</i> | 109 | 666  | 774  |
| LbrM31_V2.0350 | <i>L. braziliensis</i> | 59  | 75   | 133  |
| LbrM31_V2.0360 | <i>L. braziliensis</i> | 325 | 1    | 325  |
| LbrM31_V2.0400 | <i>L. braziliensis</i> | 156 | 93   | 248  |
| LbrM31_V2.0400 | <i>L. braziliensis</i> | 212 | 560  | 771  |
| LbrM31_V2.0400 | <i>L. braziliensis</i> | 69  | 813  | 881  |
| LbrM31_V2.0420 | <i>L. braziliensis</i> | 85  | 279  | 363  |
| LbrM31_V2.0430 | <i>L. braziliensis</i> | 114 | 1    | 114  |
| LbrM31_V2.0440 | <i>L. braziliensis</i> | 79  | 1    | 79   |
| LbrM31_V2.0450 | <i>L. braziliensis</i> | 60  | 217  | 276  |
| LbrM31_V2.0450 | <i>L. braziliensis</i> | 159 | 325  | 483  |
| LbrM31_V2.0460 | <i>L. braziliensis</i> | 86  | 1    | 86   |
| LbrM31_V2.0470 | <i>L. braziliensis</i> | 88  | 1    | 88   |
| LbrM31_V2.0480 | <i>L. braziliensis</i> | 69  | 255  | 323  |
| LbrM31_V2.0480 | <i>L. braziliensis</i> | 49  | 914  | 962  |
| LbrM31_V2.0480 | <i>L. braziliensis</i> | 49  | 914  | 962  |
| LbrM31_V2.0490 | <i>L. braziliensis</i> | 47  | 1    | 47   |
| LbrM31_V2.0490 | <i>L. braziliensis</i> | 48  | 76   | 123  |
| LbrM31_V2.0490 | <i>L. braziliensis</i> | 46  | 147  | 192  |
| LbrM31_V2.0490 | <i>L. braziliensis</i> | 42  | 326  | 367  |
| LbrM31_V2.0490 | <i>L. braziliensis</i> | 44  | 635  | 678  |
| LbrM31_V2.0500 | <i>L. braziliensis</i> | 66  | 1    | 66   |
| LbrM31_V2.0500 | <i>L. braziliensis</i> | 42  | 121  | 162  |
| LbrM31_V2.0500 | <i>L. braziliensis</i> | 56  | 302  | 357  |
| LbrM31_V2.0500 | <i>L. braziliensis</i> | 41  | 391  | 431  |
| LbrM31_V2.0500 | <i>L. braziliensis</i> | 68  | 604  | 671  |
| LbrM31_V2.0500 | <i>L. braziliensis</i> | 330 | 738  | 1067 |
| LbrM31_V2.0500 | <i>L. braziliensis</i> | 53  | 1109 | 1161 |
| LbrM31_V2.0500 | <i>L. braziliensis</i> | 63  | 1339 | 1401 |
| LbrM31_V2.0510 | <i>L. braziliensis</i> | 118 | 73   | 190  |
| LbrM31_V2.0520 | <i>L. braziliensis</i> | 123 | 1    | 123  |
| LbrM31_V2.0520 | <i>L. braziliensis</i> | 452 | 139  | 590  |
| LbrM31_V2.0520 | <i>L. braziliensis</i> | 86  | 656  | 741  |
| LbrM31_V2.0530 | <i>L. braziliensis</i> | 44  | 1    | 44   |
| LbrM31_V2.0530 | <i>L. braziliensis</i> | 53  | 131  | 183  |
| LbrM31_V2.0540 | <i>L. braziliensis</i> | 54  | 50   | 103  |
| LbrM31_V2.0570 | <i>L. braziliensis</i> | 75  | 1    | 75   |
| LbrM31_V2.0580 | <i>L. braziliensis</i> | 132 | 1    | 132  |
| LbrM31_V2.0580 | <i>L. braziliensis</i> | 106 | 785  | 890  |
| LbrM31_V2.0580 | <i>L. braziliensis</i> | 106 | 785  | 890  |
| LbrM31_V2.0590 | <i>L. braziliensis</i> | 103 | 21   | 123  |
| LbrM31_V2.0590 | <i>L. braziliensis</i> | 44  | 174  | 217  |
| LbrM31_V2.0590 | <i>L. braziliensis</i> | 74  | 766  | 839  |
| LbrM31_V2.0640 | <i>L. braziliensis</i> | 91  | 147  | 237  |

|                |                        |     |      |      |
|----------------|------------------------|-----|------|------|
| LbrM31_V2.0650 | <i>L. braziliensis</i> | 108 | 34   | 141  |
| LbrM31_V2.0650 | <i>L. braziliensis</i> | 75  | 453  | 527  |
| LbrM31_V2.0660 | <i>L. braziliensis</i> | 137 | 1    | 137  |
| LbrM31_V2.0660 | <i>L. braziliensis</i> | 85  | 141  | 225  |
| LbrM31_V2.0660 | <i>L. braziliensis</i> | 58  | 231  | 288  |
| LbrM31_V2.0660 | <i>L. braziliensis</i> | 102 | 361  | 462  |
| LbrM31_V2.0660 | <i>L. braziliensis</i> | 42  | 476  | 517  |
| LbrM31_V2.0660 | <i>L. braziliensis</i> | 61  | 557  | 617  |
| LbrM31_V2.0670 | <i>L. braziliensis</i> | 70  | 32   | 101  |
| LbrM31_V2.0670 | <i>L. braziliensis</i> | 66  | 212  | 277  |
| LbrM31_V2.0670 | <i>L. braziliensis</i> | 65  | 531  | 595  |
| LbrM31_V2.0680 | <i>L. braziliensis</i> | 155 | 73   | 227  |
| LbrM31_V2.0690 | <i>L. braziliensis</i> | 165 | 1    | 165  |
| LbrM31_V2.0690 | <i>L. braziliensis</i> | 154 | 213  | 366  |
| LbrM31_V2.0690 | <i>L. braziliensis</i> | 164 | 372  | 535  |
| LbrM31_V2.0690 | <i>L. braziliensis</i> | 86  | 589  | 674  |
| LbrM31_V2.0700 | <i>L. braziliensis</i> | 84  | 42   | 125  |
| LbrM31_V2.0700 | <i>L. braziliensis</i> | 84  | 753  | 836  |
| LbrM31_V2.0710 | <i>L. braziliensis</i> | 143 | 1    | 143  |
| LbrM31_V2.0710 | <i>L. braziliensis</i> | 74  | 203  | 276  |
| LbrM31_V2.0710 | <i>L. braziliensis</i> | 90  | 331  | 420  |
| LbrM31_V2.0710 | <i>L. braziliensis</i> | 82  | 430  | 511  |
| LbrM31_V2.0710 | <i>L. braziliensis</i> | 178 | 576  | 753  |
| LbrM31_V2.0710 | <i>L. braziliensis</i> | 59  | 1068 | 1126 |
| LbrM31_V2.0730 | <i>L. braziliensis</i> | 62  | 1    | 62   |
| LbrM31_V2.0740 | <i>L. braziliensis</i> | 52  | 48   | 99   |
| LbrM31_V2.0750 | <i>L. braziliensis</i> | 116 | 1    | 116  |
| LbrM31_V2.0770 | <i>L. braziliensis</i> | 103 | 30   | 132  |
| LbrM31_V2.0770 | <i>L. braziliensis</i> | 96  | 197  | 292  |
| LbrM31_V2.0770 | <i>L. braziliensis</i> | 71  | 375  | 445  |
| LbrM31_V2.0780 | <i>L. braziliensis</i> | 96  | 1    | 96   |
| LbrM31_V2.0780 | <i>L. braziliensis</i> | 134 | 126  | 259  |
| LbrM31_V2.0780 | <i>L. braziliensis</i> | 40  | 424  | 463  |
| LbrM31_V2.0790 | <i>L. braziliensis</i> | 86  | 85   | 170  |
| LbrM31_V2.0790 | <i>L. braziliensis</i> | 79  | 248  | 326  |
| LbrM31_V2.0790 | <i>L. braziliensis</i> | 61  | 365  | 425  |
| LbrM31_V2.0790 | <i>L. braziliensis</i> | 56  | 632  | 687  |
| LbrM31_V2.0800 | <i>L. braziliensis</i> | 93  | 48   | 140  |
| LbrM31_V2.0800 | <i>L. braziliensis</i> | 69  | 254  | 322  |
| LbrM31_V2.0800 | <i>L. braziliensis</i> | 53  | 457  | 509  |
| LbrM31_V2.0810 | <i>L. braziliensis</i> | 46  | 41   | 86   |
| LbrM31_V2.0810 | <i>L. braziliensis</i> | 47  | 342  | 388  |
| LbrM31_V2.0810 | <i>L. braziliensis</i> | 45  | 435  | 479  |
| LbrM31_V2.0810 | <i>L. braziliensis</i> | 63  | 679  | 741  |
| LbrM31_V2.0830 | <i>L. braziliensis</i> | 45  | 1    | 45   |
| LbrM31_V2.0830 | <i>L. braziliensis</i> | 130 | 72   | 201  |
| LbrM31_V2.0830 | <i>L. braziliensis</i> | 76  | 255  | 330  |

|                |                        |     |      |      |
|----------------|------------------------|-----|------|------|
| LbrM31_V2.0830 | <i>L. braziliensis</i> | 80  | 362  | 441  |
| LbrM31_V2.0830 | <i>L. braziliensis</i> | 60  | 448  | 507  |
| LbrM31_V2.0830 | <i>L. braziliensis</i> | 181 | 553  | 733  |
| LbrM31_V2.0830 | <i>L. braziliensis</i> | 70  | 863  | 932  |
| LbrM31_V2.0830 | <i>L. braziliensis</i> | 339 | 935  | 1273 |
| LbrM31_V2.0830 | <i>L. braziliensis</i> | 160 | 1640 | 1799 |
| LbrM31_V2.0840 | <i>L. braziliensis</i> | 489 | 1    | 489  |
| LbrM31_V2.0840 | <i>L. braziliensis</i> | 148 | 572  | 719  |
| LbrM31_V2.0850 | <i>L. braziliensis</i> | 143 | 125  | 267  |
| LbrM31_V2.0860 | <i>L. braziliensis</i> | 124 | 112  | 235  |
| LbrM31_V2.0860 | <i>L. braziliensis</i> | 41  | 320  | 360  |
| LbrM31_V2.0860 | <i>L. braziliensis</i> | 97  | 388  | 484  |
| LbrM31_V2.0870 | <i>L. braziliensis</i> | 110 | 83   | 192  |
| LbrM31_V2.0870 | <i>L. braziliensis</i> | 54  | 228  | 281  |
| LbrM31_V2.0870 | <i>L. braziliensis</i> | 51  | 353  | 403  |
| LbrM31_V2.0870 | <i>L. braziliensis</i> | 106 | 667  | 772  |
| LbrM31_V2.0880 | <i>L. braziliensis</i> | 97  | 62   | 158  |
| LbrM31_V2.0910 | <i>L. braziliensis</i> | 134 | 1    | 134  |
| LbrM31_V2.0910 | <i>L. braziliensis</i> | 248 | 432  | 679  |
| LbrM31_V2.0930 | <i>L. braziliensis</i> | 113 | 60   | 172  |
| LbrM31_V2.0940 | <i>L. braziliensis</i> | 77  | 92   | 168  |
| LbrM31_V2.0950 | <i>L. braziliensis</i> | 71  | 102  | 172  |
| LbrM31_V2.0950 | <i>L. braziliensis</i> | 127 | 223  | 349  |
| LbrM31_V2.0950 | <i>L. braziliensis</i> | 77  | 360  | 436  |
| LbrM31_V2.0960 | <i>L. braziliensis</i> | 90  | 149  | 238  |
| LbrM31_V2.0970 | <i>L. braziliensis</i> | 135 | 138  | 272  |
| LbrM31_V2.0980 | <i>L. braziliensis</i> | 84  | 1    | 84   |
| LbrM31_V2.0980 | <i>L. braziliensis</i> | 108 | 189  | 296  |
| LbrM31_V2.0990 | <i>L. braziliensis</i> | 60  | 1    | 60   |
| LbrM31_V2.0990 | <i>L. braziliensis</i> | 70  | 140  | 209  |
| LbrM31_V2.1020 | <i>L. braziliensis</i> | 47  | 187  | 233  |
| LbrM31_V2.1020 | <i>L. braziliensis</i> | 66  | 306  | 371  |
| LbrM31_V2.1020 | <i>L. braziliensis</i> | 221 | 389  | 609  |
| LbrM31_V2.1030 | <i>L. braziliensis</i> | 62  | 1    | 62   |
| LbrM31_V2.1040 | <i>L. braziliensis</i> | 44  | 1    | 44   |
| LbrM31_V2.1040 | <i>L. braziliensis</i> | 65  | 94   | 158  |
| LbrM31_V2.1060 | <i>L. braziliensis</i> | 52  | 402  | 453  |
| LbrM31_V2.1060 | <i>L. braziliensis</i> | 54  | 559  | 612  |
| LbrM31_V2.1060 | <i>L. braziliensis</i> | 75  | 734  | 808  |
| LbrM31_V2.1060 | <i>L. braziliensis</i> | 405 | 861  | 1265 |
| LbrM31_V2.1060 | <i>L. braziliensis</i> | 122 | 1372 | 1493 |
| LbrM31_V2.1060 | <i>L. braziliensis</i> | 152 | 1538 | 1689 |
| LbrM31_V2.1070 | <i>L. braziliensis</i> | 203 | 29   | 231  |
| LbrM31_V2.1070 | <i>L. braziliensis</i> | 166 | 234  | 399  |
| LbrM31_V2.1070 | <i>L. braziliensis</i> | 358 | 409  | 766  |
| LbrM31_V2.1080 | <i>L. braziliensis</i> | 496 | 1    | 496  |
| LbrM31_V2.1080 | <i>L. braziliensis</i> | 73  | 508  | 580  |

|                |                        |     |      |      |
|----------------|------------------------|-----|------|------|
| LbrM31_V2.1080 | <i>L. braziliensis</i> | 225 | 582  | 806  |
| LbrM31_V2.1080 | <i>L. braziliensis</i> | 404 | 810  | 1213 |
| LbrM31_V2.1080 | <i>L. braziliensis</i> | 179 | 1240 | 1418 |
| LbrM31_V2.1080 | <i>L. braziliensis</i> | 73  | 1435 | 1507 |
| LbrM31_V2.1080 | <i>L. braziliensis</i> | 132 | 1622 | 1753 |
| LbrM31_V2.1080 | <i>L. braziliensis</i> | 103 | 1809 | 1911 |
| LbrM31_V2.1080 | <i>L. braziliensis</i> | 134 | 1955 | 2088 |
| LbrM31_V2.1080 | <i>L. braziliensis</i> | 90  | 2090 | 2179 |
| LbrM31_V2.1080 | <i>L. braziliensis</i> | 73  | 2420 | 2492 |
| LbrM31_V2.1090 | <i>L. braziliensis</i> | 158 | 41   | 198  |
| LbrM31_V2.1100 | <i>L. braziliensis</i> | 105 | 49   | 153  |
| LbrM31_V2.1100 | <i>L. braziliensis</i> | 77  | 479  | 555  |
| LbrM31_V2.1110 | <i>L. braziliensis</i> | 98  | 56   | 153  |
| LbrM31_V2.1110 | <i>L. braziliensis</i> | 64  | 491  | 554  |
| LbrM31_V2.1130 | <i>L. braziliensis</i> | 105 | 49   | 153  |
| LbrM31_V2.1150 | <i>L. braziliensis</i> | 52  | 148  | 199  |
| LbrM31_V2.1160 | <i>L. braziliensis</i> | 60  | 125  | 184  |
| LbrM31_V2.1170 | <i>L. braziliensis</i> | 65  | 108  | 172  |
| LbrM31_V2.1180 | <i>L. braziliensis</i> | 180 | 476  | 655  |
| LbrM31_V2.1180 | <i>L. braziliensis</i> | 42  | 681  | 722  |
| LbrM31_V2.1190 | <i>L. braziliensis</i> | 104 | 133  | 236  |
| LbrM31_V2.1190 | <i>L. braziliensis</i> | 161 | 250  | 410  |
| LbrM31_V2.1200 | <i>L. braziliensis</i> | 505 | 523  | 1027 |
| LbrM31_V2.1210 | <i>L. braziliensis</i> | 42  | 89   | 130  |
| LbrM31_V2.1210 | <i>L. braziliensis</i> | 45  | 203  | 247  |
| LbrM31_V2.1210 | <i>L. braziliensis</i> | 65  | 526  | 590  |
| LbrM31_V2.1220 | <i>L. braziliensis</i> | 73  | 11   | 83   |
| LbrM31_V2.1220 | <i>L. braziliensis</i> | 317 | 110  | 426  |
| LbrM31_V2.1220 | <i>L. braziliensis</i> | 42  | 435  | 476  |
| LbrM31_V2.1220 | <i>L. braziliensis</i> | 56  | 694  | 749  |
| LbrM31_V2.1220 | <i>L. braziliensis</i> | 74  | 785  | 858  |
| LbrM31_V2.1220 | <i>L. braziliensis</i> | 48  | 868  | 915  |
| LbrM31_V2.1230 | <i>L. braziliensis</i> | 151 | 43   | 193  |
| LbrM31_V2.1230 | <i>L. braziliensis</i> | 160 | 321  | 480  |
| LbrM31_V2.1230 | <i>L. braziliensis</i> | 41  | 502  | 542  |
| LbrM31_V2.1230 | <i>L. braziliensis</i> | 43  | 730  | 772  |
| LbrM31_V2.1240 | <i>L. braziliensis</i> | 69  | 42   | 110  |
| LbrM31_V2.1240 | <i>L. braziliensis</i> | 45  | 271  | 315  |
| LbrM31_V2.1240 | <i>L. braziliensis</i> | 45  | 271  | 315  |
| LbrM31_V2.1250 | <i>L. braziliensis</i> | 289 | 38   | 326  |
| LbrM31_V2.1260 | <i>L. braziliensis</i> | 179 | 54   | 232  |
| LbrM31_V2.1270 | <i>L. braziliensis</i> | 179 | 54   | 232  |
| LbrM31_V2.1290 | <i>L. braziliensis</i> | 921 | 43   | 963  |
| LbrM31_V2.1300 | <i>L. braziliensis</i> | 40  | 93   | 132  |
| LbrM31_V2.1350 | <i>L. braziliensis</i> | 144 | 26   | 169  |
| LbrM31_V2.1350 | <i>L. braziliensis</i> | 208 | 552  | 759  |
| LbrM31_V2.1350 | <i>L. braziliensis</i> | 194 | 829  | 1022 |

|                |                        |     |      |      |
|----------------|------------------------|-----|------|------|
| LbrM31_V2.1350 | <i>L. braziliensis</i> | 48  | 1029 | 1076 |
| LbrM31_V2.1360 | <i>L. braziliensis</i> | 45  | 1    | 45   |
| LbrM31_V2.1360 | <i>L. braziliensis</i> | 45  | 137  | 181  |
| LbrM31_V2.1360 | <i>L. braziliensis</i> | 75  | 564  | 638  |
| LbrM31_V2.1390 | <i>L. braziliensis</i> | 104 | 44   | 147  |
| LbrM31_V2.1440 | <i>L. braziliensis</i> | 43  | 60   | 102  |
| LbrM31_V2.1440 | <i>L. braziliensis</i> | 60  | 351  | 410  |
| LbrM31_V2.1440 | <i>L. braziliensis</i> | 44  | 469  | 512  |
| LbrM31_V2.1440 | <i>L. braziliensis</i> | 47  | 1104 | 1150 |
| LbrM31_V2.1440 | <i>L. braziliensis</i> | 52  | 1553 | 1604 |
| LbrM31_V2.1440 | <i>L. braziliensis</i> | 63  | 1689 | 1751 |
| LbrM31_V2.1440 | <i>L. braziliensis</i> | 94  | 2132 | 2225 |
| LbrM31_V2.1440 | <i>L. braziliensis</i> | 90  | 2917 | 3006 |
| LbrM31_V2.1440 | <i>L. braziliensis</i> | 46  | 3052 | 3097 |
| LbrM31_V2.1440 | <i>L. braziliensis</i> | 62  | 3817 | 3878 |
| LbrM31_V2.1440 | <i>L. braziliensis</i> | 97  | 4295 | 4391 |
| LbrM31_V2.1440 | <i>L. braziliensis</i> | 59  | 4653 | 4711 |
| LbrM31_V2.1440 | <i>L. braziliensis</i> | 125 | 4749 | 4873 |
| LbrM31_V2.1460 | <i>L. braziliensis</i> | 46  | 406  | 451  |
| LbrM31_V2.1470 | <i>L. braziliensis</i> | 797 | 1    | 797  |
| LbrM31_V2.1470 | <i>L. braziliensis</i> | 257 | 820  | 1076 |
| LbrM31_V2.1470 | <i>L. braziliensis</i> | 71  | 1166 | 1236 |
| LbrM31_V2.1470 | <i>L. braziliensis</i> | 81  | 1282 | 1362 |
| LbrM31_V2.1480 | <i>L. braziliensis</i> | 85  | 123  | 207  |
| LbrM31_V2.1480 | <i>L. braziliensis</i> | 74  | 316  | 389  |
| LbrM31_V2.1480 | <i>L. braziliensis</i> | 203 | 452  | 654  |
| LbrM31_V2.1480 | <i>L. braziliensis</i> | 66  | 684  | 749  |
| LbrM31_V2.1480 | <i>L. braziliensis</i> | 313 | 757  | 1069 |
| LbrM31_V2.1490 | <i>L. braziliensis</i> | 82  | 87   | 168  |
| LbrM31_V2.1490 | <i>L. braziliensis</i> | 96  | 283  | 378  |
| LbrM31_V2.1490 | <i>L. braziliensis</i> | 141 | 431  | 571  |
| LbrM31_V2.1500 | <i>L. braziliensis</i> | 46  | 1    | 46   |
| LbrM31_V2.1500 | <i>L. braziliensis</i> | 47  | 175  | 221  |
| LbrM31_V2.1500 | <i>L. braziliensis</i> | 86  | 672  | 757  |
| LbrM31_V2.1500 | <i>L. braziliensis</i> | 68  | 973  | 1040 |
| LbrM31_V2.1500 | <i>L. braziliensis</i> | 42  | 1371 | 1412 |
| LbrM31_V2.1510 | <i>L. braziliensis</i> | 100 | 124  | 223  |
| LbrM31_V2.1510 | <i>L. braziliensis</i> | 40  | 1499 | 1538 |
| LbrM31_V2.1510 | <i>L. braziliensis</i> | 40  | 1499 | 1538 |
| LbrM31_V2.1520 | <i>L. braziliensis</i> | 49  | 123  | 171  |
| LbrM31_V2.1530 | <i>L. braziliensis</i> | 204 | 1    | 204  |
| LbrM31_V2.1530 | <i>L. braziliensis</i> | 662 | 243  | 904  |
| LbrM31_V2.1540 | <i>L. braziliensis</i> | 63  | 1    | 63   |
| LbrM31_V2.1540 | <i>L. braziliensis</i> | 106 | 69   | 174  |
| LbrM31_V2.1540 | <i>L. braziliensis</i> | 193 | 248  | 440  |
| LbrM31_V2.1550 | <i>L. braziliensis</i> | 54  | 73   | 126  |
| LbrM31_V2.1560 | <i>L. braziliensis</i> | 60  | 98   | 157  |



|                |                        |     |      |      |
|----------------|------------------------|-----|------|------|
| LbrM31_V2.1560 | <i>L. braziliensis</i> | 95  | 203  | 297  |
| LbrM31_V2.1560 | <i>L. braziliensis</i> | 41  | 408  | 448  |
| LbrM31_V2.1560 | <i>L. braziliensis</i> | 60  | 543  | 602  |
| LbrM31_V2.1560 | <i>L. braziliensis</i> | 101 | 636  | 736  |
| LbrM31_V2.1560 | <i>L. braziliensis</i> | 75  | 845  | 919  |
| LbrM31_V2.1560 | <i>L. braziliensis</i> | 56  | 948  | 1003 |
| LbrM31_V2.1560 | <i>L. braziliensis</i> | 106 | 1099 | 1204 |
| LbrM31_V2.1560 | <i>L. braziliensis</i> | 62  | 1208 | 1269 |
| LbrM31_V2.1570 | <i>L. braziliensis</i> | 145 | 79   | 223  |
| LbrM31_V2.1570 | <i>L. braziliensis</i> | 82  | 238  | 319  |
| LbrM31_V2.1570 | <i>L. braziliensis</i> | 44  | 356  | 399  |
| LbrM31_V2.1570 | <i>L. braziliensis</i> | 62  | 451  | 512  |
| LbrM31_V2.1580 | <i>L. braziliensis</i> | 49  | 1    | 49   |
| LbrM31_V2.1580 | <i>L. braziliensis</i> | 179 | 77   | 255  |
| LbrM31_V2.1580 | <i>L. braziliensis</i> | 179 | 77   | 255  |
| LbrM31_V2.1590 | <i>L. braziliensis</i> | 95  | 1    | 95   |
| LbrM31_V2.1590 | <i>L. braziliensis</i> | 169 | 141  | 309  |
| LbrM31_V2.1600 | <i>L. braziliensis</i> | 713 | 1    | 713  |
| LbrM31_V2.1600 | <i>L. braziliensis</i> | 41  | 728  | 768  |
| LbrM31_V2.1600 | <i>L. braziliensis</i> | 218 | 816  | 1033 |
| LbrM31_V2.1600 | <i>L. braziliensis</i> | 50  | 1153 | 1202 |
| LbrM31_V2.1610 | <i>L. braziliensis</i> | 370 | 1    | 370  |
| LbrM31_V2.1610 | <i>L. braziliensis</i> | 181 | 374  | 554  |
| LbrM31_V2.1610 | <i>L. braziliensis</i> | 84  | 567  | 650  |
| LbrM31_V2.1610 | <i>L. braziliensis</i> | 48  | 653  | 700  |
| LbrM31_V2.1610 | <i>L. braziliensis</i> | 52  | 736  | 787  |
| LbrM31_V2.1610 | <i>L. braziliensis</i> | 186 | 805  | 990  |
| LbrM31_V2.1610 | <i>L. braziliensis</i> | 116 | 994  | 1109 |
| LbrM31_V2.1620 | <i>L. braziliensis</i> | 192 | 1    | 192  |
| LbrM31_V2.1620 | <i>L. braziliensis</i> | 257 | 225  | 481  |
| LbrM31_V2.1620 | <i>L. braziliensis</i> | 73  | 521  | 593  |
| LbrM31_V2.1620 | <i>L. braziliensis</i> | 44  | 624  | 667  |
| LbrM31_V2.1630 | <i>L. braziliensis</i> | 48  | 84   | 131  |
| LbrM31_V2.1630 | <i>L. braziliensis</i> | 43  | 220  | 262  |
| LbrM31_V2.1630 | <i>L. braziliensis</i> | 65  | 359  | 423  |
| LbrM31_V2.1630 | <i>L. braziliensis</i> | 46  | 554  | 599  |
| LbrM31_V2.1630 | <i>L. braziliensis</i> | 117 | 651  | 767  |
| LbrM31_V2.1630 | <i>L. braziliensis</i> | 78  | 827  | 904  |
| LbrM31_V2.1630 | <i>L. braziliensis</i> | 68  | 957  | 1024 |
| LbrM31_V2.1630 | <i>L. braziliensis</i> | 59  | 1130 | 1188 |
| LbrM31_V2.1630 | <i>L. braziliensis</i> | 291 | 1306 | 1596 |
| LbrM31_V2.1630 | <i>L. braziliensis</i> | 357 | 1602 | 1958 |
| LbrM31_V2.1630 | <i>L. braziliensis</i> | 236 | 2004 | 2239 |
| LbrM31_V2.1630 | <i>L. braziliensis</i> | 95  | 2278 | 2372 |
| LbrM31_V2.1640 | <i>L. braziliensis</i> | 43  | 44   | 86   |
| LbrM31_V2.1640 | <i>L. braziliensis</i> | 63  | 165  | 227  |
| LbrM31_V2.1640 | <i>L. braziliensis</i> | 85  | 626  | 710  |

|                |                        |     |      |      |
|----------------|------------------------|-----|------|------|
| LbrM31_V2.1640 | <i>L. braziliensis</i> | 102 | 741  | 842  |
| LbrM31_V2.1640 | <i>L. braziliensis</i> | 79  | 849  | 927  |
| LbrM31_V2.1640 | <i>L. braziliensis</i> | 80  | 938  | 1017 |
| LbrM31_V2.1640 | <i>L. braziliensis</i> | 62  | 1053 | 1114 |
| LbrM31_V2.1650 | <i>L. braziliensis</i> | 46  | 666  | 711  |
| LbrM31_V2.1650 | <i>L. braziliensis</i> | 59  | 791  | 849  |
| LbrM31_V2.1650 | <i>L. braziliensis</i> | 154 | 969  | 1122 |
| LbrM31_V2.1650 | <i>L. braziliensis</i> | 49  | 1464 | 1512 |
| LbrM31_V2.1650 | <i>L. braziliensis</i> | 50  | 1774 | 1823 |
| LbrM31_V2.1660 | <i>L. braziliensis</i> | 367 | 141  | 507  |
| LbrM31_V2.1670 | <i>L. braziliensis</i> | 350 | 275  | 624  |
| LbrM31_V2.1690 | <i>L. braziliensis</i> | 45  | 109  | 153  |
| LbrM31_V2.1690 | <i>L. braziliensis</i> | 53  | 230  | 282  |
| LbrM31_V2.1690 | <i>L. braziliensis</i> | 62  | 408  | 469  |
| LbrM31_V2.1690 | <i>L. braziliensis</i> | 49  | 504  | 552  |
| LbrM31_V2.1690 | <i>L. braziliensis</i> | 149 | 579  | 727  |
| LbrM31_V2.1690 | <i>L. braziliensis</i> | 100 | 773  | 872  |
| LbrM31_V2.1690 | <i>L. braziliensis</i> | 65  | 926  | 990  |
| LbrM31_V2.1700 | <i>L. braziliensis</i> | 78  | 367  | 444  |
| LbrM31_V2.1700 | <i>L. braziliensis</i> | 71  | 511  | 581  |
| LbrM31_V2.1700 | <i>L. braziliensis</i> | 120 | 747  | 866  |
| LbrM31_V2.1700 | <i>L. braziliensis</i> | 41  | 1145 | 1185 |
| LbrM31_V2.1700 | <i>L. braziliensis</i> | 66  | 1395 | 1460 |
| LbrM31_V2.1700 | <i>L. braziliensis</i> | 43  | 1540 | 1582 |
| LbrM31_V2.1710 | <i>L. braziliensis</i> | 88  | 55   | 142  |
| LbrM31_V2.1710 | <i>L. braziliensis</i> | 88  | 302  | 389  |
| LbrM31_V2.1710 | <i>L. braziliensis</i> | 48  | 415  | 462  |
| LbrM31_V2.1710 | <i>L. braziliensis</i> | 41  | 1274 | 1314 |
| LbrM31_V2.1720 | <i>L. braziliensis</i> | 80  | 83   | 162  |
| LbrM31_V2.1720 | <i>L. braziliensis</i> | 47  | 223  | 269  |
| LbrM31_V2.1720 | <i>L. braziliensis</i> | 69  | 303  | 371  |
| LbrM31_V2.1720 | <i>L. braziliensis</i> | 76  | 434  | 509  |
| LbrM31_V2.1720 | <i>L. braziliensis</i> | 53  | 549  | 601  |
| LbrM31_V2.1720 | <i>L. braziliensis</i> | 152 | 810  | 961  |
| LbrM31_V2.1720 | <i>L. braziliensis</i> | 150 | 989  | 1138 |
| LbrM31_V2.1730 | <i>L. braziliensis</i> | 46  | 500  | 545  |
| LbrM31_V2.1730 | <i>L. braziliensis</i> | 245 | 629  | 873  |
| LbrM31_V2.1740 | <i>L. braziliensis</i> | 422 | 1    | 422  |
| LbrM31_V2.1740 | <i>L. braziliensis</i> | 89  | 472  | 560  |
| LbrM31_V2.1740 | <i>L. braziliensis</i> | 261 | 595  | 855  |
| LbrM31_V2.1740 | <i>L. braziliensis</i> | 285 | 942  | 1226 |
| LbrM31_V2.1740 | <i>L. braziliensis</i> | 143 | 1332 | 1474 |
| LbrM31_V2.1740 | <i>L. braziliensis</i> | 54  | 1587 | 1640 |
| LbrM31_V2.1740 | <i>L. braziliensis</i> | 196 | 1835 | 2030 |
| LbrM31_V2.1740 | <i>L. braziliensis</i> | 150 | 2122 | 2271 |
| LbrM31_V2.1750 | <i>L. braziliensis</i> | 109 | 33   | 141  |
| LbrM31_V2.1750 | <i>L. braziliensis</i> | 160 | 161  | 320  |

|                |                        |     |      |      |
|----------------|------------------------|-----|------|------|
| LbrM31_V2.1750 | <i>L. braziliensis</i> | 61  | 329  | 389  |
| LbrM31_V2.1760 | <i>L. braziliensis</i> | 62  | 201  | 262  |
| LbrM31_V2.1800 | <i>L. braziliensis</i> | 42  | 129  | 170  |
| LbrM31_V2.1840 | <i>L. braziliensis</i> | 67  | 227  | 293  |
| LbrM31_V2.1860 | <i>L. braziliensis</i> | 177 | 200  | 376  |
| LbrM31_V2.1860 | <i>L. braziliensis</i> | 110 | 556  | 665  |
| LbrM31_V2.1860 | <i>L. braziliensis</i> | 58  | 1457 | 1514 |
| LbrM31_V2.1870 | <i>L. braziliensis</i> | 55  | 192  | 246  |
| LbrM31_V2.1880 | <i>L. braziliensis</i> | 55  | 421  | 475  |
| LbrM31_V2.1910 | <i>L. braziliensis</i> | 156 | 63   | 218  |
| LbrM31_V2.1920 | <i>L. braziliensis</i> | 52  | 1    | 52   |
| LbrM31_V2.1920 | <i>L. braziliensis</i> | 44  | 327  | 370  |
| LbrM31_V2.1920 | <i>L. braziliensis</i> | 77  | 541  | 617  |
| LbrM31_V2.1920 | <i>L. braziliensis</i> | 53  | 817  | 869  |
| LbrM31_V2.1920 | <i>L. braziliensis</i> | 47  | 1109 | 1155 |
| LbrM31_V2.1930 | <i>L. braziliensis</i> | 185 | 29   | 213  |
| LbrM31_V2.1930 | <i>L. braziliensis</i> | 55  | 532  | 586  |
| LbrM31_V2.1940 | <i>L. braziliensis</i> | 200 | 1    | 200  |
| LbrM31_V2.1940 | <i>L. braziliensis</i> | 87  | 239  | 325  |
| LbrM31_V2.1940 | <i>L. braziliensis</i> | 65  | 501  | 565  |
| LbrM31_V2.1950 | <i>L. braziliensis</i> | 53  | 21   | 73   |
| LbrM31_V2.1950 | <i>L. braziliensis</i> | 41  | 471  | 511  |
| LbrM31_V2.1950 | <i>L. braziliensis</i> | 75  | 726  | 800  |
| LbrM31_V2.1950 | <i>L. braziliensis</i> | 41  | 921  | 961  |
| LbrM31_V2.1960 | <i>L. braziliensis</i> | 266 | 36   | 301  |
| LbrM31_V2.1960 | <i>L. braziliensis</i> | 57  | 328  | 384  |
| LbrM31_V2.1970 | <i>L. braziliensis</i> | 53  | 60   | 112  |
| LbrM31_V2.1970 | <i>L. braziliensis</i> | 68  | 218  | 285  |
| LbrM31_V2.1970 | <i>L. braziliensis</i> | 90  | 321  | 410  |
| LbrM31_V2.1980 | <i>L. braziliensis</i> | 52  | 86   | 137  |
| LbrM31_V2.1980 | <i>L. braziliensis</i> | 74  | 232  | 305  |
| LbrM31_V2.1980 | <i>L. braziliensis</i> | 83  | 325  | 407  |
| LbrM31_V2.1990 | <i>L. braziliensis</i> | 73  | 1    | 73   |
| LbrM31_V2.2000 | <i>L. braziliensis</i> | 44  | 1    | 44   |
| LbrM31_V2.2010 | <i>L. braziliensis</i> | 75  | 385  | 459  |
| LbrM31_V2.2020 | <i>L. braziliensis</i> | 44  | 1    | 44   |
| LbrM31_V2.2020 | <i>L. braziliensis</i> | 40  | 447  | 486  |
| LbrM31_V2.2030 | <i>L. braziliensis</i> | 106 | 500  | 605  |
| LbrM31_V2.2030 | <i>L. braziliensis</i> | 61  | 644  | 704  |
| LbrM31_V2.2030 | <i>L. braziliensis</i> | 56  | 933  | 988  |
| LbrM31_V2.2040 | <i>L. braziliensis</i> | 73  | 1    | 73   |
| LbrM31_V2.2040 | <i>L. braziliensis</i> | 40  | 476  | 515  |
| LbrM31_V2.2040 | <i>L. braziliensis</i> | 40  | 476  | 515  |
| LbrM31_V2.2050 | <i>L. braziliensis</i> | 56  | 52   | 107  |
| LbrM31_V2.2050 | <i>L. braziliensis</i> | 42  | 434  | 475  |
| LbrM31_V2.2060 | <i>L. braziliensis</i> | 73  | 1    | 73   |
| LbrM31_V2.2060 | <i>L. braziliensis</i> | 40  | 476  | 515  |

|                |                        |     |     |      |
|----------------|------------------------|-----|-----|------|
| LbrM31_V2.2070 | <i>L. braziliensis</i> | 104 | 512 | 615  |
| LbrM31_V2.2070 | <i>L. braziliensis</i> | 61  | 652 | 712  |
| LbrM31_V2.2080 | <i>L. braziliensis</i> | 106 | 502 | 607  |
| LbrM31_V2.2080 | <i>L. braziliensis</i> | 61  | 646 | 706  |
| LbrM31_V2.2080 | <i>L. braziliensis</i> | 97  | 874 | 970  |
| LbrM31_V2.2140 | <i>L. braziliensis</i> | 701 | 34  | 734  |
| LbrM31_V2.2140 | <i>L. braziliensis</i> | 45  | 741 | 785  |
| LbrM31_V2.2150 | <i>L. braziliensis</i> | 110 | 1   | 110  |
| LbrM31_V2.2150 | <i>L. braziliensis</i> | 40  | 224 | 263  |
| LbrM31_V2.2150 | <i>L. braziliensis</i> | 319 | 424 | 742  |
| LbrM31_V2.2150 | <i>L. braziliensis</i> | 100 | 992 | 1091 |
| LbrM31_V2.2160 | <i>L. braziliensis</i> | 41  | 65  | 105  |
| LbrM31_V2.2160 | <i>L. braziliensis</i> | 41  | 163 | 203  |
| LbrM31_V2.2160 | <i>L. braziliensis</i> | 69  | 584 | 652  |
| LbrM31_V2.2170 | <i>L. braziliensis</i> | 281 | 42  | 322  |
| LbrM31_V2.2170 | <i>L. braziliensis</i> | 112 | 348 | 459  |
| LbrM31_V2.2180 | <i>L. braziliensis</i> | 322 | 48  | 369  |
| LbrM31_V2.2180 | <i>L. braziliensis</i> | 186 | 385 | 570  |
| LbrM31_V2.2240 | <i>L. braziliensis</i> | 60  | 84  | 143  |
| LbrM31_V2.2260 | <i>L. braziliensis</i> | 60  | 435 | 494  |
| LbrM31_V2.2270 | <i>L. braziliensis</i> | 97  | 1   | 97   |
| LbrM31_V2.2270 | <i>L. braziliensis</i> | 108 | 104 | 211  |
| LbrM31_V2.2270 | <i>L. braziliensis</i> | 338 | 234 | 571  |
| LbrM31_V2.2300 | <i>L. braziliensis</i> | 74  | 11  | 84   |
| LbrM31_V2.2300 | <i>L. braziliensis</i> | 62  | 200 | 261  |
| LbrM31_V2.2300 | <i>L. braziliensis</i> | 70  | 285 | 354  |
| LbrM31_V2.2300 | <i>L. braziliensis</i> | 62  | 394 | 455  |
| LbrM31_V2.2330 | <i>L. braziliensis</i> | 46  | 1   | 46   |
| LbrM31_V2.2340 | <i>L. braziliensis</i> | 138 | 1   | 138  |
| LbrM31_V2.2340 | <i>L. braziliensis</i> | 66  | 237 | 302  |
| LbrM31_V2.2340 | <i>L. braziliensis</i> | 84  | 319 | 402  |
| LbrM31_V2.2350 | <i>L. braziliensis</i> | 266 | 1   | 266  |
| LbrM31_V2.2350 | <i>L. braziliensis</i> | 470 | 275 | 744  |
| LbrM31_V2.2350 | <i>L. braziliensis</i> | 58  | 774 | 831  |
| LbrM31_V2.2350 | <i>L. braziliensis</i> | 88  | 870 | 957  |
| LbrM31_V2.2350 | <i>L. braziliensis</i> | 61  | 987 | 1047 |
| LbrM31_V2.2360 | <i>L. braziliensis</i> | 389 | 1   | 389  |
| LbrM31_V2.2370 | <i>L. braziliensis</i> | 141 | 1   | 141  |
| LbrM31_V2.2370 | <i>L. braziliensis</i> | 153 | 176 | 328  |
| LbrM31_V2.2380 | <i>L. braziliensis</i> | 104 | 1   | 104  |
| LbrM31_V2.2380 | <i>L. braziliensis</i> | 75  | 127 | 201  |
| LbrM31_V2.2380 | <i>L. braziliensis</i> | 63  | 234 | 296  |
| LbrM31_V2.2380 | <i>L. braziliensis</i> | 113 | 324 | 436  |
| LbrM31_V2.2380 | <i>L. braziliensis</i> | 132 | 447 | 578  |
| LbrM31_V2.2380 | <i>L. braziliensis</i> | 118 | 611 | 728  |
| LbrM31_V2.2390 | <i>L. braziliensis</i> | 63  | 1   | 63   |
| LbrM31_V2.2400 | <i>L. braziliensis</i> | 666 | 1   | 666  |

|                |                        |     |      |      |
|----------------|------------------------|-----|------|------|
| LbrM31_V2.2400 | <i>L. braziliensis</i> | 99  | 681  | 779  |
| LbrM31_V2.2400 | <i>L. braziliensis</i> | 82  | 811  | 892  |
| LbrM31_V2.2400 | <i>L. braziliensis</i> | 92  | 910  | 1001 |
| LbrM31_V2.2420 | <i>L. braziliensis</i> | 311 | 1    | 311  |
| LbrM31_V2.2420 | <i>L. braziliensis</i> | 45  | 352  | 396  |
| LbrM31_V2.2420 | <i>L. braziliensis</i> | 367 | 425  | 791  |
| LbrM31_V2.2420 | <i>L. braziliensis</i> | 53  | 837  | 889  |
| LbrM31_V2.2430 | <i>L. braziliensis</i> | 45  | 961  | 1005 |
| LbrM31_V2.2440 | <i>L. braziliensis</i> | 592 | 1    | 592  |
| LbrM31_V2.2440 | <i>L. braziliensis</i> | 56  | 594  | 649  |
| LbrM31_V2.2440 | <i>L. braziliensis</i> | 68  | 705  | 772  |
| LbrM31_V2.2450 | <i>L. braziliensis</i> | 530 | 1    | 530  |
| LbrM31_V2.2450 | <i>L. braziliensis</i> | 174 | 543  | 716  |
| LbrM31_V2.2460 | <i>L. braziliensis</i> | 50  | 1    | 50   |
| LbrM31_V2.2460 | <i>L. braziliensis</i> | 57  | 71   | 127  |
| LbrM31_V2.2460 | <i>L. braziliensis</i> | 86  | 154  | 239  |
| LbrM31_V2.2460 | <i>L. braziliensis</i> | 51  | 247  | 297  |
| LbrM31_V2.2460 | <i>L. braziliensis</i> | 103 | 323  | 425  |
| LbrM31_V2.2470 | <i>L. braziliensis</i> | 85  | 1    | 85   |
| LbrM31_V2.2470 | <i>L. braziliensis</i> | 64  | 280  | 343  |
| LbrM31_V2.2480 | <i>L. braziliensis</i> | 131 | 48   | 178  |
| LbrM31_V2.2480 | <i>L. braziliensis</i> | 65  | 214  | 278  |
| LbrM31_V2.2480 | <i>L. braziliensis</i> | 153 | 296  | 448  |
| LbrM31_V2.2490 | <i>L. braziliensis</i> | 41  | 118  | 158  |
| LbrM31_V2.2500 | <i>L. braziliensis</i> | 228 | 1    | 228  |
| LbrM31_V2.2500 | <i>L. braziliensis</i> | 92  | 328  | 419  |
| LbrM31_V2.2500 | <i>L. braziliensis</i> | 88  | 451  | 538  |
| LbrM31_V2.2500 | <i>L. braziliensis</i> | 90  | 585  | 674  |
| LbrM31_V2.2500 | <i>L. braziliensis</i> | 326 | 709  | 1034 |
| LbrM31_V2.2500 | <i>L. braziliensis</i> | 665 | 1053 | 1717 |
| LbrM31_V2.2510 | <i>L. braziliensis</i> | 131 | 48   | 178  |
| LbrM31_V2.2510 | <i>L. braziliensis</i> | 64  | 215  | 278  |
| LbrM31_V2.2510 | <i>L. braziliensis</i> | 153 | 296  | 448  |
| LbrM31_V2.2520 | <i>L. braziliensis</i> | 84  | 1    | 84   |
| LbrM31_V2.2520 | <i>L. braziliensis</i> | 80  | 264  | 343  |
| LbrM31_V2.2530 | <i>L. braziliensis</i> | 54  | 131  | 184  |
| LbrM31_V2.2530 | <i>L. braziliensis</i> | 45  | 502  | 546  |
| LbrM31_V2.2530 | <i>L. braziliensis</i> | 45  | 502  | 546  |
| LbrM31_V2.2540 | <i>L. braziliensis</i> | 108 | 17   | 124  |
| LbrM31_V2.2540 | <i>L. braziliensis</i> | 41  | 156  | 196  |
| LbrM31_V2.2590 | <i>L. braziliensis</i> | 54  | 71   | 124  |
| LbrM31_V2.2590 | <i>L. braziliensis</i> | 73  | 154  | 226  |
| LbrM31_V2.2590 | <i>L. braziliensis</i> | 40  | 323  | 362  |
| LbrM31_V2.2600 | <i>L. braziliensis</i> | 84  | 1    | 84   |
| LbrM31_V2.2600 | <i>L. braziliensis</i> | 64  | 280  | 343  |
| LbrM31_V2.2610 | <i>L. braziliensis</i> | 45  | 1    | 45   |
| LbrM31_V2.2640 | <i>L. braziliensis</i> | 52  | 1298 | 1349 |

|                |                        |     |      |      |
|----------------|------------------------|-----|------|------|
| LbrM31_V2.2650 | <i>L. braziliensis</i> | 148 | 1    | 148  |
| LbrM31_V2.2650 | <i>L. braziliensis</i> | 195 | 152  | 346  |
| LbrM31_V2.2650 | <i>L. braziliensis</i> | 206 | 377  | 582  |
| LbrM31_V2.2660 | <i>L. braziliensis</i> | 63  | 1    | 63   |
| LbrM31_V2.2670 | <i>L. braziliensis</i> | 103 | 1    | 103  |
| LbrM31_V2.2670 | <i>L. braziliensis</i> | 173 | 140  | 312  |
| LbrM31_V2.2670 | <i>L. braziliensis</i> | 337 | 356  | 692  |
| LbrM31_V2.2670 | <i>L. braziliensis</i> | 133 | 698  | 830  |
| LbrM31_V2.2680 | <i>L. braziliensis</i> | 61  | 205  | 265  |
| LbrM31_V2.2690 | <i>L. braziliensis</i> | 98  | 58   | 155  |
| LbrM31_V2.2690 | <i>L. braziliensis</i> | 118 | 184  | 301  |
| LbrM31_V2.2690 | <i>L. braziliensis</i> | 88  | 396  | 483  |
| LbrM31_V2.2690 | <i>L. braziliensis</i> | 114 | 522  | 635  |
| LbrM31_V2.2690 | <i>L. braziliensis</i> | 116 | 696  | 811  |
| LbrM31_V2.2690 | <i>L. braziliensis</i> | 43  | 895  | 937  |
| LbrM31_V2.2690 | <i>L. braziliensis</i> | 42  | 1056 | 1097 |
| LbrM31_V2.2690 | <i>L. braziliensis</i> | 68  | 1157 | 1224 |
| LbrM31_V2.2700 | <i>L. braziliensis</i> | 137 | 1    | 137  |
| LbrM31_V2.2710 | <i>L. braziliensis</i> | 46  | 119  | 164  |
| LbrM31_V2.2730 | <i>L. braziliensis</i> | 51  | 104  | 154  |
| LbrM31_V2.2770 | <i>L. braziliensis</i> | 66  | 1    | 66   |
| LbrM31_V2.2790 | <i>L. braziliensis</i> | 46  | 15   | 60   |
| LbrM31_V2.2820 | <i>L. braziliensis</i> | 66  | 1    | 66   |
| LbrM31_V2.2840 | <i>L. braziliensis</i> | 40  | 1    | 40   |
| LbrM31_V2.2850 | <i>L. braziliensis</i> | 76  | 10   | 85   |
| LbrM31_V2.2870 | <i>L. braziliensis</i> | 81  | 215  | 295  |
| LbrM31_V2.2870 | <i>L. braziliensis</i> | 55  | 413  | 467  |
| LbrM31_V2.2870 | <i>L. braziliensis</i> | 55  | 413  | 467  |
| LbrM31_V2.2880 | <i>L. braziliensis</i> | 81  | 552  | 632  |
| LbrM31_V2.2890 | <i>L. braziliensis</i> | 52  | 51   | 102  |
| LbrM31_V2.2890 | <i>L. braziliensis</i> | 163 | 541  | 703  |
| LbrM31_V2.2900 | <i>L. braziliensis</i> | 68  | 46   | 113  |
| LbrM31_V2.2900 | <i>L. braziliensis</i> | 256 | 513  | 768  |
| LbrM31_V2.2900 | <i>L. braziliensis</i> | 74  | 816  | 889  |
| LbrM31_V2.2910 | <i>L. braziliensis</i> | 183 | 116  | 298  |
| LbrM31_V2.2910 | <i>L. braziliensis</i> | 54  | 554  | 607  |
| LbrM31_V2.2910 | <i>L. braziliensis</i> | 172 | 642  | 813  |
| LbrM31_V2.2910 | <i>L. braziliensis</i> | 212 | 837  | 1048 |
| LbrM31_V2.2910 | <i>L. braziliensis</i> | 40  | 1067 | 1106 |
| LbrM31_V2.2930 | <i>L. braziliensis</i> | 41  | 88   | 128  |
| LbrM31_V2.2930 | <i>L. braziliensis</i> | 62  | 621  | 682  |
| LbrM31_V2.2930 | <i>L. braziliensis</i> | 62  | 621  | 682  |
| LbrM31_V2.2940 | <i>L. braziliensis</i> | 104 | 206  | 309  |
| LbrM31_V2.2940 | <i>L. braziliensis</i> | 69  | 354  | 422  |
| LbrM31_V2.2950 | <i>L. braziliensis</i> | 42  | 675  | 716  |
| LbrM31_V2.2950 | <i>L. braziliensis</i> | 48  | 1463 | 1510 |
| LbrM31_V2.2950 | <i>L. braziliensis</i> | 53  | 1541 | 1593 |

|                |                        |      |      |      |
|----------------|------------------------|------|------|------|
| LbrM31_V2.2950 | <i>L. braziliensis</i> | 61   | 1602 | 1662 |
| LbrM31_V2.2960 | <i>L. braziliensis</i> | 44   | 1    | 44   |
| LbrM31_V2.2970 | <i>L. braziliensis</i> | 68   | 20   | 87   |
| LbrM31_V2.2990 | <i>L. braziliensis</i> | 41   | 1    | 41   |
| LbrM31_V2.2990 | <i>L. braziliensis</i> | 91   | 92   | 182  |
| LbrM31_V2.2990 | <i>L. braziliensis</i> | 91   | 92   | 182  |
| LbrM31_V2.3000 | <i>L. braziliensis</i> | 342  | 40   | 381  |
| LbrM31_V2.3000 | <i>L. braziliensis</i> | 179  | 412  | 590  |
| LbrM31_V2.3020 | <i>L. braziliensis</i> | 147  | 76   | 222  |
| LbrM31_V2.3020 | <i>L. braziliensis</i> | 41   | 257  | 297  |
| LbrM31_V2.3020 | <i>L. braziliensis</i> | 86   | 477  | 562  |
| LbrM31_V2.3020 | <i>L. braziliensis</i> | 71   | 602  | 672  |
| LbrM31_V2.3030 | <i>L. braziliensis</i> | 86   | 154  | 239  |
| LbrM31_V2.3030 | <i>L. braziliensis</i> | 84   | 308  | 391  |
| LbrM31_V2.3030 | <i>L. braziliensis</i> | 40   | 509  | 548  |
| LbrM31_V2.3030 | <i>L. braziliensis</i> | 76   | 655  | 730  |
| LbrM31_V2.3030 | <i>L. braziliensis</i> | 52   | 1032 | 1083 |
| LbrM31_V2.3030 | <i>L. braziliensis</i> | 42   | 1217 | 1258 |
| LbrM31_V2.3050 | <i>L. braziliensis</i> | 49   | 1    | 49   |
| LbrM31_V2.3050 | <i>L. braziliensis</i> | 83   | 262  | 344  |
| LbrM31_V2.3050 | <i>L. braziliensis</i> | 369  | 352  | 720  |
| LbrM31_V2.3070 | <i>L. braziliensis</i> | 42   | 100  | 141  |
| LbrM31_V2.3100 | <i>L. braziliensis</i> | 204  | 1    | 204  |
| LbrM31_V2.3100 | <i>L. braziliensis</i> | 111  | 238  | 348  |
| LbrM31_V2.3100 | <i>L. braziliensis</i> | 40   | 355  | 394  |
| LbrM31_V2.3110 | <i>L. braziliensis</i> | 1165 | 1    | 1165 |
| LbrM31_V2.3110 | <i>L. braziliensis</i> | 41   | 1177 | 1217 |
| LbrM31_V2.3120 | <i>L. braziliensis</i> | 97   | 117  | 213  |
| LbrM31_V2.3120 | <i>L. braziliensis</i> | 84   | 229  | 312  |
| LbrM31_V2.3130 | <i>L. braziliensis</i> | 235  | 1    | 235  |
| LbrM31_V2.3160 | <i>L. braziliensis</i> | 172  | 1    | 172  |
| LbrM31_V2.3170 | <i>L. braziliensis</i> | 87   | 44   | 130  |
| LbrM31_V2.3180 | <i>L. braziliensis</i> | 51   | 220  | 270  |
| LbrM31_V2.3190 | <i>L. braziliensis</i> | 250  | 10   | 259  |
| LbrM31_V2.3190 | <i>L. braziliensis</i> | 252  | 372  | 623  |
| LbrM31_V2.3200 | <i>L. braziliensis</i> | 74   | 30   | 103  |
| LbrM31_V2.3210 | <i>L. braziliensis</i> | 90   | 70   | 159  |
| LbrM31_V2.3220 | <i>L. braziliensis</i> | 125  | 1    | 125  |
| LbrM31_V2.3220 | <i>L. braziliensis</i> | 68   | 145  | 212  |
| LbrM31_V2.3220 | <i>L. braziliensis</i> | 83   | 252  | 334  |
| LbrM31_V2.3250 | <i>L. braziliensis</i> | 52   | 182  | 233  |
| LbrM31_V2.3250 | <i>L. braziliensis</i> | 42   | 375  | 416  |
| LbrM31_V2.3250 | <i>L. braziliensis</i> | 42   | 860  | 901  |
| LbrM31_V2.3260 | <i>L. braziliensis</i> | 176  | 1    | 176  |
| LbrM31_V2.3260 | <i>L. braziliensis</i> | 68   | 244  | 311  |
| LbrM31_V2.3260 | <i>L. braziliensis</i> | 69   | 330  | 398  |
| LbrM31_V2.3280 | <i>L. braziliensis</i> | 97   | 79   | 175  |

|                |                        |     |      |      |
|----------------|------------------------|-----|------|------|
| LbrM31_V2.3280 | <i>L. braziliensis</i> | 42  | 205  | 246  |
| LbrM31_V2.3340 | <i>L. braziliensis</i> | 79  | 1331 | 1409 |
| LbrM31_V2.3350 | <i>L. braziliensis</i> | 42  | 35   | 76   |
| LbrM31_V2.3350 | <i>L. braziliensis</i> | 49  | 765  | 813  |
| LbrM31_V2.3350 | <i>L. braziliensis</i> | 171 | 818  | 988  |
| LbrM31_V2.3360 | <i>L. braziliensis</i> | 43  | 135  | 177  |
| LbrM31_V2.3360 | <i>L. braziliensis</i> | 137 | 228  | 364  |
| LbrM31_V2.3360 | <i>L. braziliensis</i> | 105 | 527  | 631  |
| LbrM31_V2.3360 | <i>L. braziliensis</i> | 82  | 742  | 823  |
| LbrM31_V2.3360 | <i>L. braziliensis</i> | 83  | 913  | 995  |
| LbrM31_V2.3360 | <i>L. braziliensis</i> | 106 | 1030 | 1135 |
| LbrM31_V2.3360 | <i>L. braziliensis</i> | 79  | 1211 | 1289 |
| LbrM31_V2.3360 | <i>L. braziliensis</i> | 84  | 1361 | 1444 |
| LbrM31_V2.3360 | <i>L. braziliensis</i> | 199 | 1507 | 1705 |
| LbrM31_V2.3360 | <i>L. braziliensis</i> | 153 | 1780 | 1932 |
| LbrM31_V2.3370 | <i>L. braziliensis</i> | 68  | 44   | 111  |
| LbrM31_V2.3380 | <i>L. braziliensis</i> | 125 | 119  | 243  |
| LbrM31_V2.3380 | <i>L. braziliensis</i> | 109 | 348  | 456  |
| LbrM31_V2.3380 | <i>L. braziliensis</i> | 109 | 348  | 456  |
| LbrM31_V2.3390 | <i>L. braziliensis</i> | 198 | 1    | 198  |
| LbrM31_V2.3390 | <i>L. braziliensis</i> | 170 | 258  | 427  |
| LbrM31_V2.3410 | <i>L. braziliensis</i> | 99  | 30   | 128  |
| LbrM31_V2.3410 | <i>L. braziliensis</i> | 40  | 132  | 171  |
| LbrM31_V2.3410 | <i>L. braziliensis</i> | 182 | 196  | 377  |
| LbrM31_V2.3410 | <i>L. braziliensis</i> | 308 | 410  | 717  |
| LbrM31_V2.3430 | <i>L. braziliensis</i> | 76  | 1    | 76   |
| LbrM31_V2.3430 | <i>L. braziliensis</i> | 96  | 153  | 248  |
| LbrM31_V2.3430 | <i>L. braziliensis</i> | 96  | 153  | 248  |
| LbrM31_V2.3450 | <i>L. braziliensis</i> | 92  | 1    | 92   |
| LbrM31_V2.3460 | <i>L. braziliensis</i> | 46  | 1    | 46   |
| LbrM31_V2.3470 | <i>L. braziliensis</i> | 62  | 126  | 187  |
| LbrM31_V2.3480 | <i>L. braziliensis</i> | 53  | 164  | 216  |
| LbrM31_V2.3490 | <i>L. braziliensis</i> | 55  | 164  | 218  |
| LbrM31_V2.3500 | <i>L. braziliensis</i> | 53  | 139  | 191  |
| LbrM31_V2.3510 | <i>L. braziliensis</i> | 46  | 1    | 46   |
| LbrM31_V2.3520 | <i>L. braziliensis</i> | 62  | 441  | 502  |
| LbrM31_V2.3530 | <i>L. braziliensis</i> | 50  | 47   | 96   |
| LbrM31_V2.3530 | <i>L. braziliensis</i> | 73  | 145  | 217  |
| LbrM31_V2.3530 | <i>L. braziliensis</i> | 73  | 145  | 217  |
| LbrM31_V2.3550 | <i>L. braziliensis</i> | 555 | 1    | 555  |
| LbrM31_V2.3550 | <i>L. braziliensis</i> | 266 | 563  | 828  |
| LbrM31_V2.3560 | <i>L. braziliensis</i> | 47  | 536  | 582  |
| LbrM31_V2.3600 | <i>L. braziliensis</i> | 72  | 759  | 830  |
| LbrM31_V2.3600 | <i>L. braziliensis</i> | 84  | 970  | 1053 |
| LbrM31_V2.3600 | <i>L. braziliensis</i> | 52  | 1330 | 1381 |
| LbrM31_V2.3600 | <i>L. braziliensis</i> | 41  | 1429 | 1469 |
| LbrM31_V2.3620 | <i>L. braziliensis</i> | 40  | 324  | 363  |



|                |                        |     |      |      |
|----------------|------------------------|-----|------|------|
| LbrM31_V2.3630 | <i>L. braziliensis</i> | 42  | 1    | 42   |
| LbrM31_V2.3650 | <i>L. braziliensis</i> | 256 | 1    | 256  |
| LbrM31_V2.3650 | <i>L. braziliensis</i> | 443 | 294  | 736  |
| LbrM31_V2.3650 | <i>L. braziliensis</i> | 43  | 766  | 808  |
| LbrM31_V2.3650 | <i>L. braziliensis</i> | 183 | 816  | 998  |
| LbrM31_V2.3650 | <i>L. braziliensis</i> | 60  | 1106 | 1165 |
| LbrM31_V2.3650 | <i>L. braziliensis</i> | 234 | 1195 | 1428 |
| LbrM31_V2.3660 | <i>L. braziliensis</i> | 64  | 313  | 376  |
| LbrM31_V2.3670 | <i>L. braziliensis</i> | 349 | 1    | 349  |
| LbrM31_V2.3670 | <i>L. braziliensis</i> | 45  | 351  | 395  |
| LbrM31_V2.3670 | <i>L. braziliensis</i> | 273 | 488  | 760  |
| LbrM31_V2.3680 | <i>L. braziliensis</i> | 295 | 1    | 295  |
| LbrM31_V2.3680 | <i>L. braziliensis</i> | 691 | 305  | 995  |
| LbrM31_V2.3680 | <i>L. braziliensis</i> | 172 | 1006 | 1177 |
| LbrM31_V2.3680 | <i>L. braziliensis</i> | 139 | 1185 | 1323 |
| LbrM31_V2.3680 | <i>L. braziliensis</i> | 193 | 1363 | 1555 |
| LbrM31_V2.3700 | <i>L. braziliensis</i> | 101 | 282  | 382  |
| LbrM31_V2.3710 | <i>L. braziliensis</i> | 83  | 49   | 131  |
| LbrM31_V2.3710 | <i>L. braziliensis</i> | 76  | 340  | 415  |
| LbrM31_V2.3720 | <i>L. braziliensis</i> | 281 | 42   | 322  |
| LbrM31_V2.3720 | <i>L. braziliensis</i> | 63  | 348  | 410  |
| LbrM31_V2.3720 | <i>L. braziliensis</i> | 45  | 415  | 459  |
| LbrM31_V2.3730 | <i>L. braziliensis</i> | 72  | 1    | 72   |
| LbrM31_V2.3730 | <i>L. braziliensis</i> | 179 | 100  | 278  |
| LbrM31_V2.3730 | <i>L. braziliensis</i> | 62  | 486  | 547  |
| LbrM31_V2.3750 | <i>L. braziliensis</i> | 455 | 1    | 455  |
| LbrM32_V2.0010 | <i>L. braziliensis</i> | 161 | 200  | 360  |
| LbrM32_V2.0010 | <i>L. braziliensis</i> | 120 | 525  | 644  |
| LbrM32_V2.0010 | <i>L. braziliensis</i> | 58  | 1435 | 1492 |
| LbrM32_V2.0030 | <i>L. braziliensis</i> | 115 | 1    | 115  |
| LbrM32_V2.0030 | <i>L. braziliensis</i> | 54  | 139  | 192  |
| LbrM32_V2.0030 | <i>L. braziliensis</i> | 148 | 202  | 349  |
| LbrM32_V2.0030 | <i>L. braziliensis</i> | 54  | 354  | 407  |
| LbrM32_V2.0030 | <i>L. braziliensis</i> | 42  | 443  | 484  |
| LbrM32_V2.0040 | <i>L. braziliensis</i> | 50  | 1    | 50   |
| LbrM32_V2.0040 | <i>L. braziliensis</i> | 58  | 585  | 642  |
| LbrM32_V2.0040 | <i>L. braziliensis</i> | 58  | 585  | 642  |
| LbrM32_V2.0060 | <i>L. braziliensis</i> | 115 | 1    | 115  |
| LbrM32_V2.0060 | <i>L. braziliensis</i> | 54  | 139  | 192  |
| LbrM32_V2.0060 | <i>L. braziliensis</i> | 148 | 202  | 349  |
| LbrM32_V2.0060 | <i>L. braziliensis</i> | 55  | 354  | 408  |
| LbrM32_V2.0060 | <i>L. braziliensis</i> | 54  | 431  | 484  |
| LbrM32_V2.0070 | <i>L. braziliensis</i> | 93  | 246  | 338  |
| LbrM32_V2.0080 | <i>L. braziliensis</i> | 56  | 37   | 92   |
| LbrM32_V2.0080 | <i>L. braziliensis</i> | 54  | 231  | 284  |
| LbrM32_V2.0080 | <i>L. braziliensis</i> | 80  | 303  | 382  |
| LbrM32_V2.0080 | <i>L. braziliensis</i> | 50  | 388  | 437  |

|                |                        |     |      |      |
|----------------|------------------------|-----|------|------|
| LbrM32_V2.0090 | <i>L. braziliensis</i> | 51  | 179  | 229  |
| LbrM32_V2.0090 | <i>L. braziliensis</i> | 91  | 252  | 342  |
| LbrM32_V2.0110 | <i>L. braziliensis</i> | 75  | 1    | 75   |
| LbrM32_V2.0110 | <i>L. braziliensis</i> | 96  | 258  | 353  |
| LbrM32_V2.0110 | <i>L. braziliensis</i> | 96  | 258  | 353  |
| LbrM32_V2.0120 | <i>L. braziliensis</i> | 156 | 1    | 156  |
| LbrM32_V2.0130 | <i>L. braziliensis</i> | 49  | 1    | 49   |
| LbrM32_V2.0140 | <i>L. braziliensis</i> | 93  | 122  | 214  |
| LbrM32_V2.0180 | <i>L. braziliensis</i> | 157 | 1    | 157  |
| LbrM32_V2.0180 | <i>L. braziliensis</i> | 87  | 537  | 623  |
| LbrM32_V2.0180 | <i>L. braziliensis</i> | 47  | 633  | 679  |
| LbrM32_V2.0180 | <i>L. braziliensis</i> | 137 | 774  | 910  |
| LbrM32_V2.0180 | <i>L. braziliensis</i> | 116 | 962  | 1077 |
| LbrM32_V2.0200 | <i>L. braziliensis</i> | 67  | 36   | 102  |
| LbrM32_V2.0200 | <i>L. braziliensis</i> | 90  | 114  | 203  |
| LbrM32_V2.0210 | <i>L. braziliensis</i> | 224 | 1    | 224  |
| LbrM32_V2.0210 | <i>L. braziliensis</i> | 47  | 226  | 272  |
| LbrM32_V2.0210 | <i>L. braziliensis</i> | 47  | 321  | 367  |
| LbrM32_V2.0210 | <i>L. braziliensis</i> | 157 | 406  | 562  |
| LbrM32_V2.0210 | <i>L. braziliensis</i> | 248 | 570  | 817  |
| LbrM32_V2.0210 | <i>L. braziliensis</i> | 51  | 830  | 880  |
| LbrM32_V2.0210 | <i>L. braziliensis</i> | 71  | 923  | 993  |
| LbrM32_V2.0220 | <i>L. braziliensis</i> | 95  | 14   | 108  |
| LbrM32_V2.0220 | <i>L. braziliensis</i> | 83  | 176  | 258  |
| LbrM32_V2.0220 | <i>L. braziliensis</i> | 54  | 325  | 378  |
| LbrM32_V2.0240 | <i>L. braziliensis</i> | 135 | 174  | 308  |
| LbrM32_V2.0260 | <i>L. braziliensis</i> | 76  | 528  | 603  |
| LbrM32_V2.0270 | <i>L. braziliensis</i> | 93  | 91   | 183  |
| LbrM32_V2.0270 | <i>L. braziliensis</i> | 78  | 192  | 269  |
| LbrM32_V2.0270 | <i>L. braziliensis</i> | 68  | 272  | 339  |
| LbrM32_V2.0280 | <i>L. braziliensis</i> | 111 | 423  | 533  |
| LbrM32_V2.0290 | <i>L. braziliensis</i> | 105 | 97   | 201  |
| LbrM32_V2.0290 | <i>L. braziliensis</i> | 164 | 271  | 434  |
| LbrM32_V2.0290 | <i>L. braziliensis</i> | 44  | 520  | 563  |
| LbrM32_V2.0290 | <i>L. braziliensis</i> | 115 | 734  | 848  |
| LbrM32_V2.0310 | <i>L. braziliensis</i> | 51  | 417  | 467  |
| LbrM32_V2.0310 | <i>L. braziliensis</i> | 71  | 513  | 583  |
| LbrM32_V2.0310 | <i>L. braziliensis</i> | 387 | 605  | 991  |
| LbrM32_V2.0310 | <i>L. braziliensis</i> | 61  | 1022 | 1082 |
| LbrM32_V2.0320 | <i>L. braziliensis</i> | 466 | 1    | 466  |
| LbrM32_V2.0320 | <i>L. braziliensis</i> | 57  | 580  | 636  |
| LbrM32_V2.0320 | <i>L. braziliensis</i> | 74  | 923  | 996  |
| LbrM32_V2.0320 | <i>L. braziliensis</i> | 48  | 1584 | 1631 |
| LbrM32_V2.0320 | <i>L. braziliensis</i> | 355 | 1660 | 2014 |
| LbrM32_V2.0330 | <i>L. braziliensis</i> | 220 | 258  | 477  |
| LbrM32_V2.0330 | <i>L. braziliensis</i> | 902 | 484  | 1385 |
| LbrM32_V2.0340 | <i>L. braziliensis</i> | 50  | 128  | 177  |

|                |                        |     |      |      |
|----------------|------------------------|-----|------|------|
| LbrM32_V2.0340 | <i>L. braziliensis</i> | 60  | 748  | 807  |
| LbrM32_V2.0340 | <i>L. braziliensis</i> | 40  | 910  | 949  |
| LbrM32_V2.0340 | <i>L. braziliensis</i> | 121 | 1091 | 1211 |
| LbrM32_V2.0360 | <i>L. braziliensis</i> | 104 | 115  | 218  |
| LbrM32_V2.0370 | <i>L. braziliensis</i> | 50  | 1    | 50   |
| LbrM32_V2.0370 | <i>L. braziliensis</i> | 85  | 106  | 190  |
| LbrM32_V2.0370 | <i>L. braziliensis</i> | 50  | 242  | 291  |
| LbrM32_V2.0370 | <i>L. braziliensis</i> | 96  | 603  | 698  |
| LbrM32_V2.0370 | <i>L. braziliensis</i> | 176 | 709  | 884  |
| LbrM32_V2.0380 | <i>L. braziliensis</i> | 46  | 595  | 640  |
| LbrM32_V2.0380 | <i>L. braziliensis</i> | 59  | 721  | 779  |
| LbrM32_V2.0390 | <i>L. braziliensis</i> | 53  | 20   | 72   |
| LbrM32_V2.0400 | <i>L. braziliensis</i> | 156 | 1    | 156  |
| LbrM32_V2.0400 | <i>L. braziliensis</i> | 44  | 407  | 450  |
| LbrM32_V2.0400 | <i>L. braziliensis</i> | 498 | 541  | 1038 |
| LbrM32_V2.0400 | <i>L. braziliensis</i> | 46  | 1286 | 1331 |
| LbrM32_V2.0400 | <i>L. braziliensis</i> | 70  | 1377 | 1446 |
| LbrM32_V2.0400 | <i>L. braziliensis</i> | 92  | 1478 | 1569 |
| LbrM32_V2.0410 | <i>L. braziliensis</i> | 189 | 29   | 217  |
| LbrM32_V2.0410 | <i>L. braziliensis</i> | 69  | 240  | 308  |
| LbrM32_V2.0410 | <i>L. braziliensis</i> | 263 | 631  | 893  |
| LbrM32_V2.0420 | <i>L. braziliensis</i> | 231 | 1    | 231  |
| LbrM32_V2.0420 | <i>L. braziliensis</i> | 49  | 312  | 360  |
| LbrM32_V2.0420 | <i>L. braziliensis</i> | 102 | 364  | 465  |
| LbrM32_V2.0430 | <i>L. braziliensis</i> | 287 | 1    | 287  |
| LbrM32_V2.0430 | <i>L. braziliensis</i> | 58  | 300  | 357  |
| LbrM32_V2.0440 | <i>L. braziliensis</i> | 52  | 451  | 502  |
| LbrM32_V2.0440 | <i>L. braziliensis</i> | 60  | 832  | 891  |
| LbrM32_V2.0440 | <i>L. braziliensis</i> | 60  | 832  | 891  |
| LbrM32_V2.0450 | <i>L. braziliensis</i> | 89  | 1    | 89   |
| LbrM32_V2.0450 | <i>L. braziliensis</i> | 194 | 105  | 298  |
| LbrM32_V2.0450 | <i>L. braziliensis</i> | 131 | 333  | 463  |
| LbrM32_V2.0470 | <i>L. braziliensis</i> | 102 | 1    | 102  |
| LbrM32_V2.0470 | <i>L. braziliensis</i> | 98  | 507  | 604  |
| LbrM32_V2.0480 | <i>L. braziliensis</i> | 55  | 1    | 55   |
| LbrM32_V2.0480 | <i>L. braziliensis</i> | 43  | 273  | 315  |
| LbrM32_V2.0480 | <i>L. braziliensis</i> | 46  | 659  | 704  |
| LbrM32_V2.0490 | <i>L. braziliensis</i> | 69  | 375  | 443  |
| LbrM32_V2.0520 | <i>L. braziliensis</i> | 52  | 1    | 52   |
| LbrM32_V2.0540 | <i>L. braziliensis</i> | 196 | 126  | 321  |
| LbrM32_V2.0540 | <i>L. braziliensis</i> | 125 | 334  | 458  |
| LbrM32_V2.0560 | <i>L. braziliensis</i> | 49  | 33   | 81   |
| LbrM32_V2.0590 | <i>L. braziliensis</i> | 48  | 1    | 48   |
| LbrM32_V2.0610 | <i>L. braziliensis</i> | 52  | 19   | 70   |
| LbrM32_V2.0610 | <i>L. braziliensis</i> | 44  | 116  | 159  |
| LbrM32_V2.0610 | <i>L. braziliensis</i> | 86  | 298  | 383  |
| LbrM32_V2.0640 | <i>L. braziliensis</i> | 47  | 80   | 126  |

|                |                        |     |     |      |
|----------------|------------------------|-----|-----|------|
| LbrM32_V2.0650 | <i>L. braziliensis</i> | 111 | 1   | 111  |
| LbrM32_V2.0650 | <i>L. braziliensis</i> | 74  | 511 | 584  |
| LbrM32_V2.0660 | <i>L. braziliensis</i> | 157 | 108 | 264  |
| LbrM32_V2.0660 | <i>L. braziliensis</i> | 177 | 315 | 491  |
| LbrM32_V2.0670 | <i>L. braziliensis</i> | 76  | 98  | 173  |
| LbrM32_V2.0670 | <i>L. braziliensis</i> | 42  | 226 | 267  |
| LbrM32_V2.0680 | <i>L. braziliensis</i> | 81  | 375 | 455  |
| LbrM32_V2.0680 | <i>L. braziliensis</i> | 40  | 520 | 559  |
| LbrM32_V2.0680 | <i>L. braziliensis</i> | 40  | 520 | 559  |
| LbrM32_V2.0690 | <i>L. braziliensis</i> | 55  | 160 | 214  |
| LbrM32_V2.0700 | <i>L. braziliensis</i> | 154 | 1   | 154  |
| LbrM32_V2.0700 | <i>L. braziliensis</i> | 40  | 245 | 284  |
| LbrM32_V2.0720 | <i>L. braziliensis</i> | 61  | 1   | 61   |
| LbrM32_V2.0720 | <i>L. braziliensis</i> | 105 | 500 | 604  |
| LbrM32_V2.0730 | <i>L. braziliensis</i> | 50  | 28  | 77   |
| LbrM32_V2.0750 | <i>L. braziliensis</i> | 69  | 99  | 167  |
| LbrM32_V2.0750 | <i>L. braziliensis</i> | 46  | 198 | 243  |
| LbrM32_V2.0750 | <i>L. braziliensis</i> | 46  | 198 | 243  |
| LbrM32_V2.0760 | <i>L. braziliensis</i> | 154 | 334 | 487  |
| LbrM32_V2.0760 | <i>L. braziliensis</i> | 164 | 515 | 678  |
| LbrM32_V2.0760 | <i>L. braziliensis</i> | 317 | 802 | 1118 |
| LbrM32_V2.0780 | <i>L. braziliensis</i> | 87  | 147 | 233  |
| LbrM32_V2.0810 | <i>L. braziliensis</i> | 110 | 1   | 110  |
| LbrM32_V2.0820 | <i>L. braziliensis</i> | 43  | 151 | 193  |
| LbrM32_V2.0820 | <i>L. braziliensis</i> | 198 | 280 | 477  |
| LbrM32_V2.0820 | <i>L. braziliensis</i> | 108 | 486 | 593  |
| LbrM32_V2.0840 | <i>L. braziliensis</i> | 59  | 1   | 59   |
| LbrM32_V2.0860 | <i>L. braziliensis</i> | 159 | 207 | 365  |
| LbrM32_V2.0870 | <i>L. braziliensis</i> | 93  | 93  | 185  |
| LbrM32_V2.0870 | <i>L. braziliensis</i> | 49  | 264 | 312  |
| LbrM32_V2.0870 | <i>L. braziliensis</i> | 48  | 525 | 572  |
| LbrM32_V2.0870 | <i>L. braziliensis</i> | 154 | 599 | 752  |
| LbrM32_V2.0890 | <i>L. braziliensis</i> | 79  | 127 | 205  |
| LbrM32_V2.0890 | <i>L. braziliensis</i> | 48  | 490 | 537  |
| LbrM32_V2.0890 | <i>L. braziliensis</i> | 43  | 790 | 832  |
| LbrM32_V2.0900 | <i>L. braziliensis</i> | 128 | 927 | 1054 |
| LbrM32_V2.0920 | <i>L. braziliensis</i> | 118 | 194 | 311  |
| LbrM32_V2.0920 | <i>L. braziliensis</i> | 60  | 328 | 387  |
| LbrM32_V2.0920 | <i>L. braziliensis</i> | 47  | 420 | 466  |
| LbrM32_V2.0930 | <i>L. braziliensis</i> | 50  | 1   | 50   |
| LbrM32_V2.0930 | <i>L. braziliensis</i> | 246 | 52  | 297  |
| LbrM32_V2.0940 | <i>L. braziliensis</i> | 140 | 57  | 196  |
| LbrM32_V2.0940 | <i>L. braziliensis</i> | 182 | 271 | 452  |
| LbrM32_V2.0940 | <i>L. braziliensis</i> | 109 | 643 | 751  |
| LbrM32_V2.0950 | <i>L. braziliensis</i> | 51  | 476 | 526  |
| LbrM32_V2.0960 | <i>L. braziliensis</i> | 40  | 284 | 323  |
| LbrM32_V2.0990 | <i>L. braziliensis</i> | 56  | 52  | 107  |

|                |                        |     |      |      |
|----------------|------------------------|-----|------|------|
| LbrM32_V2.1010 | <i>L. braziliensis</i> | 63  | 700  | 762  |
| LbrM32_V2.1020 | <i>L. braziliensis</i> | 42  | 559  | 600  |
| LbrM32_V2.1030 | <i>L. braziliensis</i> | 139 | 250  | 388  |
| LbrM32_V2.1030 | <i>L. braziliensis</i> | 143 | 667  | 809  |
| LbrM32_V2.1030 | <i>L. braziliensis</i> | 143 | 667  | 809  |
| LbrM32_V2.1040 | <i>L. braziliensis</i> | 48  | 305  | 352  |
| LbrM32_V2.1050 | <i>L. braziliensis</i> | 88  | 148  | 235  |
| LbrM32_V2.1060 | <i>L. braziliensis</i> | 54  | 43   | 96   |
| LbrM32_V2.1060 | <i>L. braziliensis</i> | 88  | 455  | 542  |
| LbrM32_V2.1060 | <i>L. braziliensis</i> | 74  | 715  | 788  |
| LbrM32_V2.1060 | <i>L. braziliensis</i> | 60  | 985  | 1044 |
| LbrM32_V2.1060 | <i>L. braziliensis</i> | 67  | 1115 | 1181 |
| LbrM32_V2.1060 | <i>L. braziliensis</i> | 102 | 1374 | 1475 |
| LbrM32_V2.1060 | <i>L. braziliensis</i> | 91  | 1494 | 1584 |
| LbrM32_V2.1060 | <i>L. braziliensis</i> | 76  | 1607 | 1682 |
| LbrM32_V2.1060 | <i>L. braziliensis</i> | 106 | 1711 | 1816 |
| LbrM32_V2.1070 | <i>L. braziliensis</i> | 154 | 1    | 154  |
| LbrM32_V2.1070 | <i>L. braziliensis</i> | 75  | 273  | 347  |
| LbrM32_V2.1070 | <i>L. braziliensis</i> | 50  | 428  | 477  |
| LbrM32_V2.1080 | <i>L. braziliensis</i> | 45  | 335  | 379  |
| LbrM32_V2.1090 | <i>L. braziliensis</i> | 66  | 162  | 227  |
| LbrM32_V2.1100 | <i>L. braziliensis</i> | 51  | 230  | 280  |
| LbrM32_V2.1110 | <i>L. braziliensis</i> | 152 | 190  | 341  |
| LbrM32_V2.1120 | <i>L. braziliensis</i> | 61  | 47   | 107  |
| LbrM32_V2.1120 | <i>L. braziliensis</i> | 206 | 178  | 383  |
| LbrM32_V2.1120 | <i>L. braziliensis</i> | 51  | 494  | 544  |
| LbrM32_V2.1120 | <i>L. braziliensis</i> | 47  | 753  | 799  |
| LbrM32_V2.1140 | <i>L. braziliensis</i> | 58  | 15   | 72   |
| LbrM32_V2.1140 | <i>L. braziliensis</i> | 66  | 113  | 178  |
| LbrM32_V2.1140 | <i>L. braziliensis</i> | 102 | 207  | 308  |
| LbrM32_V2.1140 | <i>L. braziliensis</i> | 120 | 347  | 466  |
| LbrM32_V2.1160 | <i>L. braziliensis</i> | 85  | 1    | 85   |
| LbrM32_V2.1160 | <i>L. braziliensis</i> | 93  | 509  | 601  |
| LbrM32_V2.1190 | <i>L. braziliensis</i> | 43  | 297  | 339  |
| LbrM32_V2.1190 | <i>L. braziliensis</i> | 74  | 370  | 443  |
| LbrM32_V2.1190 | <i>L. braziliensis</i> | 107 | 831  | 937  |
| LbrM32_V2.1190 | <i>L. braziliensis</i> | 57  | 957  | 1013 |
| LbrM32_V2.1190 | <i>L. braziliensis</i> | 45  | 1033 | 1077 |
| LbrM32_V2.1210 | <i>L. braziliensis</i> | 60  | 1    | 60   |
| LbrM32_V2.1230 | <i>L. braziliensis</i> | 196 | 1    | 196  |
| LbrM32_V2.1230 | <i>L. braziliensis</i> | 848 | 216  | 1063 |
| LbrM32_V2.1240 | <i>L. braziliensis</i> | 45  | 146  | 190  |
| LbrM32_V2.1250 | <i>L. braziliensis</i> | 144 | 1    | 144  |
| LbrM32_V2.1260 | <i>L. braziliensis</i> | 43  | 90   | 132  |
| LbrM32_V2.1270 | <i>L. braziliensis</i> | 43  | 90   | 132  |
| LbrM32_V2.1280 | <i>L. braziliensis</i> | 151 | 1    | 151  |
| LbrM32_V2.1280 | <i>L. braziliensis</i> | 166 | 164  | 329  |

|                |                        |     |      |      |
|----------------|------------------------|-----|------|------|
| LbrM32_V2.1280 | <i>L. braziliensis</i> | 204 | 361  | 564  |
| LbrM32_V2.1290 | <i>L. braziliensis</i> | 46  | 19   | 64   |
| LbrM32_V2.1290 | <i>L. braziliensis</i> | 106 | 79   | 184  |
| LbrM32_V2.1290 | <i>L. braziliensis</i> | 49  | 222  | 270  |
| LbrM32_V2.1290 | <i>L. braziliensis</i> | 44  | 396  | 439  |
| LbrM32_V2.1290 | <i>L. braziliensis</i> | 59  | 495  | 553  |
| LbrM32_V2.1300 | <i>L. braziliensis</i> | 40  | 184  | 223  |
| LbrM32_V2.1330 | <i>L. braziliensis</i> | 110 | 146  | 255  |
| LbrM32_V2.1330 | <i>L. braziliensis</i> | 80  | 418  | 497  |
| LbrM32_V2.1330 | <i>L. braziliensis</i> | 135 | 532  | 666  |
| LbrM32_V2.1340 | <i>L. braziliensis</i> | 50  | 92   | 141  |
| LbrM32_V2.1340 | <i>L. braziliensis</i> | 193 | 186  | 378  |
| LbrM32_V2.1340 | <i>L. braziliensis</i> | 123 | 405  | 527  |
| LbrM32_V2.1360 | <i>L. braziliensis</i> | 53  | 365  | 417  |
| LbrM32_V2.1370 | <i>L. braziliensis</i> | 40  | 219  | 258  |
| LbrM32_V2.1370 | <i>L. braziliensis</i> | 133 | 399  | 531  |
| LbrM32_V2.1370 | <i>L. braziliensis</i> | 107 | 584  | 690  |
| LbrM32_V2.1370 | <i>L. braziliensis</i> | 93  | 705  | 797  |
| LbrM32_V2.1380 | <i>L. braziliensis</i> | 73  | 120  | 192  |
| LbrM32_V2.1380 | <i>L. braziliensis</i> | 170 | 239  | 408  |
| LbrM32_V2.1390 | <i>L. braziliensis</i> | 55  | 109  | 163  |
| LbrM32_V2.1390 | <i>L. braziliensis</i> | 77  | 459  | 535  |
| LbrM32_V2.1390 | <i>L. braziliensis</i> | 41  | 779  | 819  |
| LbrM32_V2.1400 | <i>L. braziliensis</i> | 103 | 67   | 169  |
| LbrM32_V2.1410 | <i>L. braziliensis</i> | 41  | 397  | 437  |
| LbrM32_V2.1420 | <i>L. braziliensis</i> | 40  | 316  | 355  |
| LbrM32_V2.1420 | <i>L. braziliensis</i> | 47  | 396  | 442  |
| LbrM32_V2.1420 | <i>L. braziliensis</i> | 47  | 396  | 442  |
| LbrM32_V2.1430 | <i>L. braziliensis</i> | 44  | 26   | 69   |
| LbrM32_V2.1430 | <i>L. braziliensis</i> | 174 | 169  | 342  |
| LbrM32_V2.1430 | <i>L. braziliensis</i> | 41  | 450  | 490  |
| LbrM32_V2.1430 | <i>L. braziliensis</i> | 44  | 594  | 637  |
| LbrM32_V2.1450 | <i>L. braziliensis</i> | 69  | 86   | 154  |
| LbrM32_V2.1460 | <i>L. braziliensis</i> | 63  | 1    | 63   |
| LbrM32_V2.1470 | <i>L. braziliensis</i> | 111 | 112  | 222  |
| LbrM32_V2.1470 | <i>L. braziliensis</i> | 156 | 226  | 381  |
| LbrM32_V2.1480 | <i>L. braziliensis</i> | 256 | 98   | 353  |
| LbrM32_V2.1480 | <i>L. braziliensis</i> | 98  | 387  | 484  |
| LbrM32_V2.1490 | <i>L. braziliensis</i> | 102 | 1    | 102  |
| LbrM32_V2.1500 | <i>L. braziliensis</i> | 108 | 167  | 274  |
| LbrM32_V2.1500 | <i>L. braziliensis</i> | 47  | 581  | 627  |
| LbrM32_V2.1500 | <i>L. braziliensis</i> | 62  | 629  | 690  |
| LbrM32_V2.1500 | <i>L. braziliensis</i> | 47  | 1118 | 1164 |
| LbrM32_V2.1510 | <i>L. braziliensis</i> | 46  | 33   | 78   |
| LbrM32_V2.1520 | <i>L. braziliensis</i> | 115 | 1    | 115  |
| LbrM32_V2.1530 | <i>L. braziliensis</i> | 243 | 1    | 243  |
| LbrM32_V2.1530 | <i>L. braziliensis</i> | 44  | 276  | 319  |

|                |                        |     |      |      |
|----------------|------------------------|-----|------|------|
| LbrM32_V2.1540 | <i>L. braziliensis</i> | 154 | 88   | 241  |
| LbrM32_V2.1540 | <i>L. braziliensis</i> | 65  | 288  | 352  |
| LbrM32_V2.1550 | <i>L. braziliensis</i> | 81  | 99   | 179  |
| LbrM32_V2.1560 | <i>L. braziliensis</i> | 49  | 324  | 372  |
| LbrM32_V2.1560 | <i>L. braziliensis</i> | 93  | 628  | 720  |
| LbrM32_V2.1560 | <i>L. braziliensis</i> | 44  | 928  | 971  |
| LbrM32_V2.1560 | <i>L. braziliensis</i> | 44  | 995  | 1038 |
| LbrM32_V2.1560 | <i>L. braziliensis</i> | 299 | 1131 | 1429 |
| LbrM32_V2.1560 | <i>L. braziliensis</i> | 170 | 1509 | 1678 |
| LbrM32_V2.1570 | <i>L. braziliensis</i> | 49  | 253  | 301  |
| LbrM32_V2.1580 | <i>L. braziliensis</i> | 41  | 458  | 498  |
| LbrM32_V2.1590 | <i>L. braziliensis</i> | 461 | 1    | 461  |
| LbrM32_V2.1590 | <i>L. braziliensis</i> | 168 | 790  | 957  |
| LbrM32_V2.1600 | <i>L. braziliensis</i> | 44  | 104  | 147  |
| LbrM32_V2.1610 | <i>L. braziliensis</i> | 49  | 1    | 49   |
| LbrM32_V2.1620 | <i>L. braziliensis</i> | 52  | 1    | 52   |
| LbrM32_V2.1620 | <i>L. braziliensis</i> | 53  | 202  | 254  |
| LbrM32_V2.1620 | <i>L. braziliensis</i> | 94  | 860  | 953  |
| LbrM32_V2.1620 | <i>L. braziliensis</i> | 74  | 1375 | 1448 |
| LbrM32_V2.1630 | <i>L. braziliensis</i> | 80  | 123  | 202  |
| LbrM32_V2.1630 | <i>L. braziliensis</i> | 48  | 232  | 279  |
| LbrM32_V2.1630 | <i>L. braziliensis</i> | 48  | 232  | 279  |
| LbrM32_V2.1640 | <i>L. braziliensis</i> | 62  | 189  | 250  |
| LbrM32_V2.1640 | <i>L. braziliensis</i> | 51  | 423  | 473  |
| LbrM32_V2.1640 | <i>L. braziliensis</i> | 51  | 423  | 473  |
| LbrM32_V2.1650 | <i>L. braziliensis</i> | 190 | 1    | 190  |
| LbrM32_V2.1660 | <i>L. braziliensis</i> | 131 | 1    | 131  |
| LbrM32_V2.1660 | <i>L. braziliensis</i> | 104 | 162  | 265  |
| LbrM32_V2.1670 | <i>L. braziliensis</i> | 106 | 1    | 106  |
| LbrM32_V2.1670 | <i>L. braziliensis</i> | 48  | 154  | 201  |
| LbrM32_V2.1670 | <i>L. braziliensis</i> | 53  | 407  | 459  |
| LbrM32_V2.1690 | <i>L. braziliensis</i> | 128 | 108  | 235  |
| LbrM32_V2.1690 | <i>L. braziliensis</i> | 106 | 514  | 619  |
| LbrM32_V2.1690 | <i>L. braziliensis</i> | 106 | 514  | 619  |
| LbrM32_V2.1700 | <i>L. braziliensis</i> | 86  | 1    | 86   |
| LbrM32_V2.1700 | <i>L. braziliensis</i> | 49  | 304  | 352  |
| LbrM32_V2.1700 | <i>L. braziliensis</i> | 49  | 304  | 352  |
| LbrM32_V2.1710 | <i>L. braziliensis</i> | 65  | 60   | 124  |
| LbrM32_V2.1710 | <i>L. braziliensis</i> | 50  | 183  | 232  |
| LbrM32_V2.1710 | <i>L. braziliensis</i> | 50  | 183  | 232  |
| LbrM32_V2.1720 | <i>L. braziliensis</i> | 93  | 106  | 198  |
| LbrM32_V2.1730 | <i>L. braziliensis</i> | 90  | 1    | 90   |
| LbrM32_V2.1730 | <i>L. braziliensis</i> | 85  | 779  | 863  |
| LbrM32_V2.1740 | <i>L. braziliensis</i> | 69  | 135  | 203  |
| LbrM32_V2.1740 | <i>L. braziliensis</i> | 353 | 242  | 594  |
| LbrM32_V2.1740 | <i>L. braziliensis</i> | 113 | 624  | 736  |
| LbrM32_V2.1760 | <i>L. braziliensis</i> | 67  | 47   | 113  |

|                |                        |     |      |      |
|----------------|------------------------|-----|------|------|
| LbrM32_V2.1760 | <i>L. braziliensis</i> | 43  | 206  | 248  |
| LbrM32_V2.1760 | <i>L. braziliensis</i> | 59  | 362  | 420  |
| LbrM32_V2.1760 | <i>L. braziliensis</i> | 40  | 647  | 686  |
| LbrM32_V2.1770 | <i>L. braziliensis</i> | 560 | 1    | 560  |
| LbrM32_V2.1770 | <i>L. braziliensis</i> | 59  | 608  | 666  |
| LbrM32_V2.1790 | <i>L. braziliensis</i> | 62  | 300  | 361  |
| LbrM32_V2.1790 | <i>L. braziliensis</i> | 47  | 722  | 768  |
| LbrM32_V2.1800 | <i>L. braziliensis</i> | 109 | 147  | 255  |
| LbrM32_V2.1800 | <i>L. braziliensis</i> | 122 | 268  | 389  |
| LbrM32_V2.1810 | <i>L. braziliensis</i> | 83  | 133  | 215  |
| LbrM32_V2.1820 | <i>L. braziliensis</i> | 207 | 1    | 207  |
| LbrM32_V2.1820 | <i>L. braziliensis</i> | 159 | 219  | 377  |
| LbrM32_V2.1820 | <i>L. braziliensis</i> | 70  | 430  | 499  |
| LbrM32_V2.1830 | <i>L. braziliensis</i> | 266 | 1    | 266  |
| LbrM32_V2.1830 | <i>L. braziliensis</i> | 510 | 270  | 779  |
| LbrM32_V2.1830 | <i>L. braziliensis</i> | 110 | 849  | 958  |
| LbrM32_V2.1830 | <i>L. braziliensis</i> | 141 | 981  | 1121 |
| LbrM32_V2.1830 | <i>L. braziliensis</i> | 53  | 1137 | 1189 |
| LbrM32_V2.1860 | <i>L. braziliensis</i> | 44  | 1    | 44   |
| LbrM32_V2.1860 | <i>L. braziliensis</i> | 170 | 397  | 566  |
| LbrM32_V2.1870 | <i>L. braziliensis</i> | 56  | 209  | 264  |
| LbrM32_V2.1870 | <i>L. braziliensis</i> | 51  | 294  | 344  |
| LbrM32_V2.1870 | <i>L. braziliensis</i> | 103 | 398  | 500  |
| LbrM32_V2.1880 | <i>L. braziliensis</i> | 81  | 292  | 372  |
| LbrM32_V2.1890 | <i>L. braziliensis</i> | 83  | 541  | 623  |
| LbrM32_V2.1910 | <i>L. braziliensis</i> | 75  | 53   | 127  |
| LbrM32_V2.1920 | <i>L. braziliensis</i> | 66  | 368  | 433  |
| LbrM32_V2.1920 | <i>L. braziliensis</i> | 63  | 708  | 770  |
| LbrM32_V2.1930 | <i>L. braziliensis</i> | 47  | 108  | 154  |
| LbrM32_V2.1930 | <i>L. braziliensis</i> | 128 | 195  | 322  |
| LbrM32_V2.1930 | <i>L. braziliensis</i> | 124 | 352  | 475  |
| LbrM32_V2.1940 | <i>L. braziliensis</i> | 43  | 25   | 67   |
| LbrM32_V2.1950 | <i>L. braziliensis</i> | 68  | 1    | 68   |
| LbrM32_V2.1960 | <i>L. braziliensis</i> | 53  | 249  | 301  |
| LbrM32_V2.1970 | <i>L. braziliensis</i> | 244 | 1    | 244  |
| LbrM32_V2.1980 | <i>L. braziliensis</i> | 79  | 43   | 121  |
| LbrM32_V2.1990 | <i>L. braziliensis</i> | 68  | 58   | 125  |
| LbrM32_V2.2030 | <i>L. braziliensis</i> | 54  | 541  | 594  |
| LbrM32_V2.2040 | <i>L. braziliensis</i> | 98  | 106  | 203  |
| LbrM32_V2.2050 | <i>L. braziliensis</i> | 41  | 176  | 216  |
| LbrM32_V2.2050 | <i>L. braziliensis</i> | 250 | 360  | 609  |
| LbrM32_V2.2060 | <i>L. braziliensis</i> | 78  | 1    | 78   |
| LbrM32_V2.2080 | <i>L. braziliensis</i> | 42  | 517  | 558  |
| LbrM32_V2.2080 | <i>L. braziliensis</i> | 46  | 591  | 636  |
| LbrM32_V2.2080 | <i>L. braziliensis</i> | 50  | 1073 | 1122 |
| LbrM32_V2.2090 | <i>L. braziliensis</i> | 99  | 129  | 227  |
| LbrM32_V2.2090 | <i>L. braziliensis</i> | 150 | 284  | 433  |



|                |                        |     |      |      |
|----------------|------------------------|-----|------|------|
| LbrM32_V2.2090 | <i>L. braziliensis</i> | 93  | 478  | 570  |
| LbrM32_V2.2100 | <i>L. braziliensis</i> | 109 | 336  | 444  |
| LbrM32_V2.2120 | <i>L. braziliensis</i> | 303 | 1    | 303  |
| LbrM32_V2.2120 | <i>L. braziliensis</i> | 212 | 386  | 597  |
| LbrM32_V2.2120 | <i>L. braziliensis</i> | 47  | 707  | 753  |
| LbrM32_V2.2140 | <i>L. braziliensis</i> | 77  | 1    | 77   |
| LbrM32_V2.2140 | <i>L. braziliensis</i> | 66  | 303  | 368  |
| LbrM32_V2.2140 | <i>L. braziliensis</i> | 81  | 370  | 450  |
| LbrM32_V2.2160 | <i>L. braziliensis</i> | 102 | 1    | 102  |
| LbrM32_V2.2160 | <i>L. braziliensis</i> | 95  | 206  | 300  |
| LbrM32_V2.2160 | <i>L. braziliensis</i> | 55  | 367  | 421  |
| LbrM32_V2.2170 | <i>L. braziliensis</i> | 42  | 1    | 42   |
| LbrM32_V2.2170 | <i>L. braziliensis</i> | 73  | 221  | 293  |
| LbrM32_V2.2180 | <i>L. braziliensis</i> | 148 | 1    | 148  |
| LbrM32_V2.2190 | <i>L. braziliensis</i> | 144 | 37   | 180  |
| LbrM32_V2.2190 | <i>L. braziliensis</i> | 105 | 227  | 331  |
| LbrM32_V2.2190 | <i>L. braziliensis</i> | 115 | 380  | 494  |
| LbrM32_V2.2190 | <i>L. braziliensis</i> | 109 | 497  | 605  |
| LbrM32_V2.2190 | <i>L. braziliensis</i> | 99  | 628  | 726  |
| LbrM32_V2.2200 | <i>L. braziliensis</i> | 110 | 1    | 110  |
| LbrM32_V2.2210 | <i>L. braziliensis</i> | 101 | 270  | 370  |
| LbrM32_V2.2230 | <i>L. braziliensis</i> | 52  | 71   | 122  |
| LbrM32_V2.2250 | <i>L. braziliensis</i> | 218 | 1    | 218  |
| LbrM32_V2.2250 | <i>L. braziliensis</i> | 87  | 231  | 317  |
| LbrM32_V2.2250 | <i>L. braziliensis</i> | 284 | 549  | 832  |
| LbrM32_V2.2270 | <i>L. braziliensis</i> | 41  | 585  | 625  |
| LbrM32_V2.2290 | <i>L. braziliensis</i> | 88  | 41   | 128  |
| LbrM32_V2.2290 | <i>L. braziliensis</i> | 62  | 187  | 248  |
| LbrM32_V2.2290 | <i>L. braziliensis</i> | 45  | 291  | 335  |
| LbrM32_V2.2290 | <i>L. braziliensis</i> | 52  | 407  | 458  |
| LbrM32_V2.2310 | <i>L. braziliensis</i> | 48  | 80   | 127  |
| LbrM32_V2.2310 | <i>L. braziliensis</i> | 231 | 312  | 542  |
| LbrM32_V2.2310 | <i>L. braziliensis</i> | 115 | 560  | 674  |
| LbrM32_V2.2310 | <i>L. braziliensis</i> | 178 | 723  | 900  |
| LbrM32_V2.2320 | <i>L. braziliensis</i> | 112 | 45   | 156  |
| LbrM32_V2.2320 | <i>L. braziliensis</i> | 148 | 208  | 355  |
| LbrM32_V2.2320 | <i>L. braziliensis</i> | 193 | 463  | 655  |
| LbrM32_V2.2340 | <i>L. braziliensis</i> | 114 | 64   | 177  |
| LbrM32_V2.2340 | <i>L. braziliensis</i> | 192 | 212  | 403  |
| LbrM32_V2.2370 | <i>L. braziliensis</i> | 131 | 17   | 147  |
| LbrM32_V2.2370 | <i>L. braziliensis</i> | 80  | 358  | 437  |
| LbrM32_V2.2380 | <i>L. braziliensis</i> | 175 | 1130 | 1304 |
| LbrM32_V2.2390 | <i>L. braziliensis</i> | 132 | 68   | 199  |
| LbrM32_V2.2410 | <i>L. braziliensis</i> | 349 | 1    | 349  |
| LbrM32_V2.2410 | <i>L. braziliensis</i> | 91  | 475  | 565  |
| LbrM32_V2.2420 | <i>L. braziliensis</i> | 126 | 1    | 126  |
| LbrM32_V2.2430 | <i>L. braziliensis</i> | 62  | 145  | 206  |

|                |                        |      |      |      |
|----------------|------------------------|------|------|------|
| LbrM32_V2.2440 | <i>L. braziliensis</i> | 114  | 82   | 195  |
| LbrM32_V2.2440 | <i>L. braziliensis</i> | 893  | 198  | 1090 |
| LbrM32_V2.2440 | <i>L. braziliensis</i> | 273  | 1099 | 1371 |
| LbrM32_V2.2440 | <i>L. braziliensis</i> | 155  | 1491 | 1645 |
| LbrM32_V2.2450 | <i>L. braziliensis</i> | 195  | 1    | 195  |
| LbrM32_V2.2450 | <i>L. braziliensis</i> | 59   | 426  | 484  |
| LbrM32_V2.2460 | <i>L. braziliensis</i> | 52   | 1    | 52   |
| LbrM32_V2.2460 | <i>L. braziliensis</i> | 80   | 104  | 183  |
| LbrM32_V2.2460 | <i>L. braziliensis</i> | 48   | 314  | 361  |
| LbrM32_V2.2460 | <i>L. braziliensis</i> | 96   | 436  | 531  |
| LbrM32_V2.2460 | <i>L. braziliensis</i> | 128  | 791  | 918  |
| LbrM32_V2.2480 | <i>L. braziliensis</i> | 48   | 1    | 48   |
| LbrM32_V2.2480 | <i>L. braziliensis</i> | 65   | 138  | 202  |
| LbrM32_V2.2480 | <i>L. braziliensis</i> | 65   | 138  | 202  |
| LbrM32_V2.2490 | <i>L. braziliensis</i> | 60   | 1    | 60   |
| LbrM32_V2.2490 | <i>L. braziliensis</i> | 71   | 117  | 187  |
| LbrM32_V2.2490 | <i>L. braziliensis</i> | 71   | 117  | 187  |
| LbrM32_V2.2500 | <i>L. braziliensis</i> | 1023 | 227  | 1249 |
| LbrM32_V2.2500 | <i>L. braziliensis</i> | 207  | 1265 | 1471 |
| LbrM32_V2.2520 | <i>L. braziliensis</i> | 149  | 1    | 149  |
| LbrM32_V2.2530 | <i>L. braziliensis</i> | 87   | 1    | 87   |
| LbrM32_V2.2530 | <i>L. braziliensis</i> | 226  | 190  | 415  |
| LbrM32_V2.2540 | <i>L. braziliensis</i> | 103  | 173  | 275  |
| LbrM32_V2.2540 | <i>L. braziliensis</i> | 40   | 586  | 625  |
| LbrM32_V2.2540 | <i>L. braziliensis</i> | 149  | 654  | 802  |
| LbrM32_V2.2540 | <i>L. braziliensis</i> | 96   | 958  | 1053 |
| LbrM32_V2.2540 | <i>L. braziliensis</i> | 53   | 1070 | 1122 |
| LbrM32_V2.2540 | <i>L. braziliensis</i> | 40   | 1153 | 1192 |
| LbrM32_V2.2580 | <i>L. braziliensis</i> | 397  | 1    | 397  |
| LbrM32_V2.2590 | <i>L. braziliensis</i> | 72   | 49   | 120  |
| LbrM32_V2.2590 | <i>L. braziliensis</i> | 74   | 389  | 462  |
| LbrM32_V2.2590 | <i>L. braziliensis</i> | 74   | 389  | 462  |
| LbrM32_V2.2610 | <i>L. braziliensis</i> | 77   | 328  | 404  |
| LbrM32_V2.2620 | <i>L. braziliensis</i> | 43   | 1    | 43   |
| LbrM32_V2.2620 | <i>L. braziliensis</i> | 97   | 83   | 179  |
| LbrM32_V2.2620 | <i>L. braziliensis</i> | 276  | 196  | 471  |
| LbrM32_V2.2650 | <i>L. braziliensis</i> | 45   | 1    | 45   |
| LbrM32_V2.2650 | <i>L. braziliensis</i> | 68   | 314  | 381  |
| LbrM32_V2.2650 | <i>L. braziliensis</i> | 101  | 436  | 536  |
| LbrM32_V2.2650 | <i>L. braziliensis</i> | 287  | 543  | 829  |
| LbrM32_V2.2650 | <i>L. braziliensis</i> | 190  | 864  | 1053 |
| LbrM32_V2.2650 | <i>L. braziliensis</i> | 94   | 1064 | 1157 |
| LbrM32_V2.2650 | <i>L. braziliensis</i> | 311  | 1177 | 1487 |
| LbrM32_V2.2650 | <i>L. braziliensis</i> | 184  | 1520 | 1703 |
| LbrM32_V2.2650 | <i>L. braziliensis</i> | 58   | 1768 | 1825 |
| LbrM32_V2.2650 | <i>L. braziliensis</i> | 63   | 1889 | 1951 |
| LbrM32_V2.2650 | <i>L. braziliensis</i> | 167  | 1960 | 2126 |

|                |                        |     |      |      |
|----------------|------------------------|-----|------|------|
| LbrM32_V2.2660 | <i>L. braziliensis</i> | 110 | 33   | 142  |
| LbrM32_V2.2660 | <i>L. braziliensis</i> | 68  | 230  | 297  |
| LbrM32_V2.2660 | <i>L. braziliensis</i> | 59  | 479  | 537  |
| LbrM32_V2.2660 | <i>L. braziliensis</i> | 75  | 792  | 866  |
| LbrM32_V2.2670 | <i>L. braziliensis</i> | 56  | 77   | 132  |
| LbrM32_V2.2680 | <i>L. braziliensis</i> | 52  | 1    | 52   |
| LbrM32_V2.2680 | <i>L. braziliensis</i> | 56  | 361  | 416  |
| LbrM32_V2.2700 | <i>L. braziliensis</i> | 140 | 121  | 260  |
| LbrM32_V2.2700 | <i>L. braziliensis</i> | 623 | 308  | 930  |
| LbrM32_V2.2710 | <i>L. braziliensis</i> | 52  | 1    | 52   |
| LbrM32_V2.2720 | <i>L. braziliensis</i> | 144 | 39   | 182  |
| LbrM32_V2.2720 | <i>L. braziliensis</i> | 98  | 615  | 712  |
| LbrM32_V2.2720 | <i>L. braziliensis</i> | 41  | 1142 | 1182 |
| LbrM32_V2.2740 | <i>L. braziliensis</i> | 66  | 60   | 125  |
| LbrM32_V2.2740 | <i>L. braziliensis</i> | 46  | 458  | 503  |
| LbrM32_V2.2740 | <i>L. braziliensis</i> | 46  | 458  | 503  |
| LbrM32_V2.2750 | <i>L. braziliensis</i> | 70  | 1    | 70   |
| LbrM32_V2.2750 | <i>L. braziliensis</i> | 831 | 82   | 912  |
| LbrM32_V2.2760 | <i>L. braziliensis</i> | 74  | 149  | 222  |
| LbrM32_V2.2760 | <i>L. braziliensis</i> | 75  | 448  | 522  |
| LbrM32_V2.2770 | <i>L. braziliensis</i> | 81  | 531  | 611  |
| LbrM32_V2.2770 | <i>L. braziliensis</i> | 55  | 619  | 673  |
| LbrM32_V2.2780 | <i>L. braziliensis</i> | 54  | 123  | 176  |
| LbrM32_V2.2780 | <i>L. braziliensis</i> | 55  | 1390 | 1444 |
| LbrM32_V2.2780 | <i>L. braziliensis</i> | 44  | 1488 | 1531 |
| LbrM32_V2.2790 | <i>L. braziliensis</i> | 48  | 133  | 180  |
| LbrM32_V2.2800 | <i>L. braziliensis</i> | 335 | 1    | 335  |
| LbrM32_V2.2800 | <i>L. braziliensis</i> | 85  | 342  | 426  |
| LbrM32_V2.2800 | <i>L. braziliensis</i> | 76  | 439  | 514  |
| LbrM32_V2.2800 | <i>L. braziliensis</i> | 49  | 520  | 568  |
| LbrM32_V2.2800 | <i>L. braziliensis</i> | 138 | 594  | 731  |
| LbrM32_V2.2810 | <i>L. braziliensis</i> | 51  | 316  | 366  |
| LbrM32_V2.2820 | <i>L. braziliensis</i> | 50  | 1    | 50   |
| LbrM32_V2.2830 | <i>L. braziliensis</i> | 51  | 1    | 51   |
| LbrM32_V2.2830 | <i>L. braziliensis</i> | 124 | 321  | 444  |
| LbrM32_V2.2830 | <i>L. braziliensis</i> | 169 | 547  | 715  |
| LbrM32_V2.2840 | <i>L. braziliensis</i> | 467 | 1    | 467  |
| LbrM32_V2.2840 | <i>L. braziliensis</i> | 367 | 482  | 848  |
| LbrM32_V2.2890 | <i>L. braziliensis</i> | 67  | 222  | 288  |
| LbrM32_V2.2900 | <i>L. braziliensis</i> | 59  | 1    | 59   |
| LbrM32_V2.2910 | <i>L. braziliensis</i> | 40  | 24   | 63   |
| LbrM32_V2.2910 | <i>L. braziliensis</i> | 132 | 120  | 251  |
| LbrM32_V2.2910 | <i>L. braziliensis</i> | 66  | 363  | 428  |
| LbrM32_V2.2910 | <i>L. braziliensis</i> | 77  | 440  | 516  |
| LbrM32_V2.2910 | <i>L. braziliensis</i> | 94  | 543  | 636  |
| LbrM32_V2.2940 | <i>L. braziliensis</i> | 57  | 226  | 282  |
| LbrM32_V2.2940 | <i>L. braziliensis</i> | 51  | 590  | 640  |

|                |                        |     |      |      |
|----------------|------------------------|-----|------|------|
| LbrM32_V2.2970 | <i>L. braziliensis</i> | 43  | 302  | 344  |
| LbrM32_V2.2970 | <i>L. braziliensis</i> | 53  | 405  | 457  |
| LbrM32_V2.2970 | <i>L. braziliensis</i> | 53  | 405  | 457  |
| LbrM32_V2.2990 | <i>L. braziliensis</i> | 149 | 1    | 149  |
| LbrM32_V2.2990 | <i>L. braziliensis</i> | 160 | 437  | 596  |
| LbrM32_V2.2990 | <i>L. braziliensis</i> | 71  | 832  | 902  |
| LbrM32_V2.2990 | <i>L. braziliensis</i> | 56  | 1168 | 1223 |
| LbrM32_V2.3000 | <i>L. braziliensis</i> | 262 | 1    | 262  |
| LbrM32_V2.3000 | <i>L. braziliensis</i> | 40  | 390  | 429  |
| LbrM32_V2.3000 | <i>L. braziliensis</i> | 203 | 490  | 692  |
| LbrM32_V2.3000 | <i>L. braziliensis</i> | 152 | 702  | 853  |
| LbrM32_V2.3010 | <i>L. braziliensis</i> | 50  | 1    | 50   |
| LbrM32_V2.3010 | <i>L. braziliensis</i> | 791 | 161  | 951  |
| LbrM32_V2.3020 | <i>L. braziliensis</i> | 48  | 984  | 1031 |
| LbrM32_V2.3020 | <i>L. braziliensis</i> | 56  | 1037 | 1092 |
| LbrM32_V2.3020 | <i>L. braziliensis</i> | 56  | 1037 | 1092 |
| LbrM32_V2.3030 | <i>L. braziliensis</i> | 48  | 1    | 48   |
| LbrM32_V2.3040 | <i>L. braziliensis</i> | 178 | 1    | 178  |
| LbrM32_V2.3040 | <i>L. braziliensis</i> | 68  | 413  | 480  |
| LbrM32_V2.3050 | <i>L. braziliensis</i> | 127 | 1    | 127  |
| LbrM32_V2.3050 | <i>L. braziliensis</i> | 43  | 215  | 257  |
| LbrM32_V2.3060 | <i>L. braziliensis</i> | 71  | 1    | 71   |
| LbrM32_V2.3070 | <i>L. braziliensis</i> | 283 | 33   | 315  |
| LbrM32_V2.3070 | <i>L. braziliensis</i> | 62  | 400  | 461  |
| LbrM32_V2.3070 | <i>L. braziliensis</i> | 51  | 463  | 513  |
| LbrM32_V2.3070 | <i>L. braziliensis</i> | 528 | 593  | 1120 |
| LbrM32_V2.3080 | <i>L. braziliensis</i> | 141 | 110  | 250  |
| LbrM32_V2.3080 | <i>L. braziliensis</i> | 90  | 262  | 351  |
| LbrM32_V2.3080 | <i>L. braziliensis</i> | 80  | 376  | 455  |
| LbrM32_V2.3090 | <i>L. braziliensis</i> | 184 | 96   | 279  |
| LbrM32_V2.3090 | <i>L. braziliensis</i> | 54  | 393  | 446  |
| LbrM32_V2.3090 | <i>L. braziliensis</i> | 50  | 499  | 548  |
| LbrM32_V2.3100 | <i>L. braziliensis</i> | 130 | 168  | 297  |
| LbrM32_V2.3100 | <i>L. braziliensis</i> | 153 | 312  | 464  |
| LbrM32_V2.3120 | <i>L. braziliensis</i> | 317 | 1    | 317  |
| LbrM32_V2.3120 | <i>L. braziliensis</i> | 116 | 384  | 499  |
| LbrM32_V2.3120 | <i>L. braziliensis</i> | 84  | 528  | 611  |
| LbrM32_V2.3120 | <i>L. braziliensis</i> | 60  | 659  | 718  |
| LbrM32_V2.3130 | <i>L. braziliensis</i> | 46  | 134  | 179  |
| LbrM32_V2.3130 | <i>L. braziliensis</i> | 71  | 183  | 253  |
| LbrM32_V2.3130 | <i>L. braziliensis</i> | 43  | 343  | 385  |
| LbrM32_V2.3140 | <i>L. braziliensis</i> | 92  | 1    | 92   |
| LbrM32_V2.3150 | <i>L. braziliensis</i> | 63  | 1    | 63   |
| LbrM32_V2.3150 | <i>L. braziliensis</i> | 147 | 161  | 307  |
| LbrM32_V2.3150 | <i>L. braziliensis</i> | 49  | 354  | 402  |
| LbrM32_V2.3150 | <i>L. braziliensis</i> | 77  | 472  | 548  |
| LbrM32_V2.3150 | <i>L. braziliensis</i> | 62  | 557  | 618  |

|                |                        |     |      |      |
|----------------|------------------------|-----|------|------|
| LbrM32_V2.3160 | <i>L. braziliensis</i> | 101 | 15   | 115  |
| LbrM32_V2.3160 | <i>L. braziliensis</i> | 47  | 883  | 929  |
| LbrM32_V2.3160 | <i>L. braziliensis</i> | 44  | 1063 | 1106 |
| LbrM32_V2.3180 | <i>L. braziliensis</i> | 54  | 344  | 397  |
| LbrM32_V2.3220 | <i>L. braziliensis</i> | 41  | 625  | 665  |
| LbrM32_V2.3230 | <i>L. braziliensis</i> | 80  | 1    | 80   |
| LbrM32_V2.3240 | <i>L. braziliensis</i> | 53  | 1    | 53   |
| LbrM32_V2.3260 | <i>L. braziliensis</i> | 61  | 681  | 741  |
| LbrM32_V2.3300 | <i>L. braziliensis</i> | 80  | 806  | 885  |
| LbrM32_V2.3310 | <i>L. braziliensis</i> | 129 | 352  | 480  |
| LbrM32_V2.3310 | <i>L. braziliensis</i> | 74  | 488  | 561  |
| LbrM32_V2.3310 | <i>L. braziliensis</i> | 41  | 652  | 692  |
| LbrM32_V2.3310 | <i>L. braziliensis</i> | 41  | 722  | 762  |
| LbrM32_V2.3320 | <i>L. braziliensis</i> | 192 | 80   | 271  |
| LbrM32_V2.3340 | <i>L. braziliensis</i> | 41  | 1    | 41   |
| LbrM32_V2.3350 | <i>L. braziliensis</i> | 89  | 39   | 127  |
| LbrM32_V2.3350 | <i>L. braziliensis</i> | 58  | 185  | 242  |
| LbrM32_V2.3350 | <i>L. braziliensis</i> | 140 | 422  | 561  |
| LbrM32_V2.3350 | <i>L. braziliensis</i> | 56  | 628  | 683  |
| LbrM32_V2.3350 | <i>L. braziliensis</i> | 242 | 851  | 1092 |
| LbrM32_V2.3370 | <i>L. braziliensis</i> | 232 | 1    | 232  |
| LbrM32_V2.3370 | <i>L. braziliensis</i> | 133 | 313  | 445  |
| LbrM32_V2.3370 | <i>L. braziliensis</i> | 49  | 615  | 663  |
| LbrM32_V2.3380 | <i>L. braziliensis</i> | 64  | 1    | 64   |
| LbrM32_V2.3390 | <i>L. braziliensis</i> | 301 | 1    | 301  |
| LbrM32_V2.3390 | <i>L. braziliensis</i> | 173 | 305  | 477  |
| LbrM32_V2.3390 | <i>L. braziliensis</i> | 184 | 497  | 680  |
| LbrM32_V2.3390 | <i>L. braziliensis</i> | 49  | 738  | 786  |
| LbrM32_V2.3390 | <i>L. braziliensis</i> | 51  | 814  | 864  |
| LbrM32_V2.3390 | <i>L. braziliensis</i> | 63  | 925  | 987  |
| LbrM32_V2.3390 | <i>L. braziliensis</i> | 46  | 998  | 1043 |
| LbrM32_V2.3390 | <i>L. braziliensis</i> | 177 | 1256 | 1432 |
| LbrM32_V2.3390 | <i>L. braziliensis</i> | 75  | 1434 | 1508 |
| LbrM32_V2.3400 | <i>L. braziliensis</i> | 46  | 214  | 259  |
| LbrM32_V2.3400 | <i>L. braziliensis</i> | 51  | 420  | 470  |
| LbrM32_V2.3400 | <i>L. braziliensis</i> | 51  | 420  | 470  |
| LbrM32_V2.3410 | <i>L. braziliensis</i> | 42  | 1    | 42   |
| LbrM32_V2.3420 | <i>L. braziliensis</i> | 87  | 68   | 154  |
| LbrM32_V2.3430 | <i>L. braziliensis</i> | 56  | 1    | 56   |
| LbrM32_V2.3440 | <i>L. braziliensis</i> | 98  | 1    | 98   |
| LbrM32_V2.3440 | <i>L. braziliensis</i> | 365 | 280  | 644  |
| LbrM32_V2.3440 | <i>L. braziliensis</i> | 74  | 677  | 750  |
| LbrM32_V2.3440 | <i>L. braziliensis</i> | 54  | 760  | 813  |
| LbrM32_V2.3440 | <i>L. braziliensis</i> | 55  | 862  | 916  |
| LbrM32_V2.3440 | <i>L. braziliensis</i> | 89  | 988  | 1076 |
| LbrM32_V2.3440 | <i>L. braziliensis</i> | 352 | 1086 | 1437 |
| LbrM32_V2.3440 | <i>L. braziliensis</i> | 79  | 1448 | 1526 |

|                |                        |     |      |      |
|----------------|------------------------|-----|------|------|
| LbrM32_V2.3440 | <i>L. braziliensis</i> | 325 | 1595 | 1919 |
| LbrM32_V2.3440 | <i>L. braziliensis</i> | 70  | 2060 | 2129 |
| LbrM32_V2.3440 | <i>L. braziliensis</i> | 101 | 2151 | 2251 |
| LbrM32_V2.3440 | <i>L. braziliensis</i> | 65  | 2348 | 2412 |
| LbrM32_V2.3450 | <i>L. braziliensis</i> | 88  | 39   | 126  |
| LbrM32_V2.3450 | <i>L. braziliensis</i> | 85  | 248  | 332  |
| LbrM32_V2.3450 | <i>L. braziliensis</i> | 114 | 537  | 650  |
| LbrM32_V2.3450 | <i>L. braziliensis</i> | 70  | 701  | 770  |
| LbrM32_V2.3470 | <i>L. braziliensis</i> | 46  | 251  | 296  |
| LbrM32_V2.3470 | <i>L. braziliensis</i> | 45  | 631  | 675  |
| LbrM32_V2.3470 | <i>L. braziliensis</i> | 45  | 631  | 675  |
| LbrM32_V2.3480 | <i>L. braziliensis</i> | 44  | 177  | 220  |
| LbrM32_V2.3480 | <i>L. braziliensis</i> | 51  | 452  | 502  |
| LbrM32_V2.3480 | <i>L. braziliensis</i> | 42  | 737  | 778  |
| LbrM32_V2.3480 | <i>L. braziliensis</i> | 54  | 937  | 990  |
| LbrM32_V2.3490 | <i>L. braziliensis</i> | 63  | 12   | 74   |
| LbrM32_V2.3490 | <i>L. braziliensis</i> | 95  | 142  | 236  |
| LbrM32_V2.3490 | <i>L. braziliensis</i> | 62  | 301  | 362  |
| LbrM32_V2.3490 | <i>L. braziliensis</i> | 143 | 391  | 533  |
| LbrM32_V2.3490 | <i>L. braziliensis</i> | 53  | 822  | 874  |
| LbrM32_V2.3490 | <i>L. braziliensis</i> | 44  | 1081 | 1124 |
| LbrM32_V2.3490 | <i>L. braziliensis</i> | 40  | 1160 | 1199 |
| LbrM32_V2.3510 | <i>L. braziliensis</i> | 286 | 1    | 286  |
| LbrM32_V2.3510 | <i>L. braziliensis</i> | 72  | 403  | 474  |
| LbrM32_V2.3520 | <i>L. braziliensis</i> | 65  | 1    | 65   |
| LbrM32_V2.3520 | <i>L. braziliensis</i> | 98  | 331  | 428  |
| LbrM32_V2.3530 | <i>L. braziliensis</i> | 59  | 203  | 261  |
| LbrM32_V2.3530 | <i>L. braziliensis</i> | 80  | 511  | 590  |
| LbrM32_V2.3530 | <i>L. braziliensis</i> | 48  | 1124 | 1171 |
| LbrM32_V2.3540 | <i>L. braziliensis</i> | 635 | 287  | 921  |
| LbrM32_V2.3540 | <i>L. braziliensis</i> | 91  | 1018 | 1108 |
| LbrM32_V2.3570 | <i>L. braziliensis</i> | 49  | 20   | 68   |
| LbrM32_V2.3570 | <i>L. braziliensis</i> | 51  | 194  | 244  |
| LbrM32_V2.3570 | <i>L. braziliensis</i> | 50  | 367  | 416  |
| LbrM32_V2.3570 | <i>L. braziliensis</i> | 159 | 462  | 620  |
| LbrM32_V2.3570 | <i>L. braziliensis</i> | 122 | 695  | 816  |
| LbrM32_V2.3580 | <i>L. braziliensis</i> | 81  | 160  | 240  |
| LbrM32_V2.3590 | <i>L. braziliensis</i> | 81  | 86   | 166  |
| LbrM32_V2.3590 | <i>L. braziliensis</i> | 103 | 212  | 314  |
| LbrM32_V2.3590 | <i>L. braziliensis</i> | 103 | 212  | 314  |
| LbrM32_V2.3600 | <i>L. braziliensis</i> | 48  | 224  | 271  |
| LbrM32_V2.3620 | <i>L. braziliensis</i> | 49  | 66   | 114  |
| LbrM32_V2.3630 | <i>L. braziliensis</i> | 43  | 38   | 80   |
| LbrM32_V2.3630 | <i>L. braziliensis</i> | 47  | 137  | 183  |
| LbrM32_V2.3630 | <i>L. braziliensis</i> | 88  | 810  | 897  |
| LbrM32_V2.3650 | <i>L. braziliensis</i> | 55  | 230  | 284  |
| LbrM32_V2.3650 | <i>L. braziliensis</i> | 257 | 389  | 645  |

|                |                        |     |      |      |
|----------------|------------------------|-----|------|------|
| LbrM32_V2.3650 | <i>L. braziliensis</i> | 110 | 664  | 773  |
| LbrM32_V2.3650 | <i>L. braziliensis</i> | 84  | 1028 | 1111 |
| LbrM32_V2.3650 | <i>L. braziliensis</i> | 49  | 1181 | 1229 |
| LbrM32_V2.3660 | <i>L. braziliensis</i> | 172 | 1    | 172  |
| LbrM32_V2.3660 | <i>L. braziliensis</i> | 56  | 229  | 284  |
| LbrM32_V2.3680 | <i>L. braziliensis</i> | 103 | 62   | 164  |
| LbrM32_V2.3680 | <i>L. braziliensis</i> | 78  | 291  | 368  |
| LbrM32_V2.3680 | <i>L. braziliensis</i> | 60  | 387  | 446  |
| LbrM32_V2.3690 | <i>L. braziliensis</i> | 47  | 18   | 64   |
| LbrM32_V2.3690 | <i>L. braziliensis</i> | 47  | 93   | 139  |
| LbrM32_V2.3690 | <i>L. braziliensis</i> | 48  | 553  | 600  |
| LbrM32_V2.3700 | <i>L. braziliensis</i> | 44  | 385  | 428  |
| LbrM32_V2.3720 | <i>L. braziliensis</i> | 76  | 1    | 76   |
| LbrM32_V2.3720 | <i>L. braziliensis</i> | 61  | 131  | 191  |
| LbrM32_V2.3720 | <i>L. braziliensis</i> | 175 | 251  | 425  |
| LbrM32_V2.3720 | <i>L. braziliensis</i> | 99  | 437  | 535  |
| LbrM32_V2.3720 | <i>L. braziliensis</i> | 80  | 564  | 643  |
| LbrM32_V2.3720 | <i>L. braziliensis</i> | 151 | 652  | 802  |
| LbrM32_V2.3730 | <i>L. braziliensis</i> | 74  | 180  | 253  |
| LbrM32_V2.3740 | <i>L. braziliensis</i> | 69  | 1    | 69   |
| LbrM32_V2.3740 | <i>L. braziliensis</i> | 54  | 109  | 162  |
| LbrM32_V2.3740 | <i>L. braziliensis</i> | 296 | 199  | 494  |
| LbrM32_V2.3740 | <i>L. braziliensis</i> | 71  | 538  | 608  |
| LbrM32_V2.3760 | <i>L. braziliensis</i> | 90  | 106  | 195  |
| LbrM32_V2.3760 | <i>L. braziliensis</i> | 97  | 358  | 454  |
| LbrM32_V2.3770 | <i>L. braziliensis</i> | 151 | 1    | 151  |
| LbrM32_V2.3770 | <i>L. braziliensis</i> | 50  | 342  | 391  |
| LbrM32_V2.3780 | <i>L. braziliensis</i> | 63  | 1    | 63   |
| LbrM32_V2.3780 | <i>L. braziliensis</i> | 75  | 515  | 589  |
| LbrM32_V2.3800 | <i>L. braziliensis</i> | 65  | 76   | 140  |
| LbrM32_V2.3800 | <i>L. braziliensis</i> | 66  | 173  | 238  |
| LbrM32_V2.3800 | <i>L. braziliensis</i> | 73  | 453  | 525  |
| LbrM32_V2.3810 | <i>L. braziliensis</i> | 63  | 64   | 126  |
| LbrM32_V2.3810 | <i>L. braziliensis</i> | 48  | 234  | 281  |
| LbrM32_V2.3810 | <i>L. braziliensis</i> | 136 | 314  | 449  |
| LbrM32_V2.3830 | <i>L. braziliensis</i> | 51  | 51   | 101  |
| LbrM32_V2.3830 | <i>L. braziliensis</i> | 83  | 117  | 199  |
| LbrM32_V2.3830 | <i>L. braziliensis</i> | 106 | 430  | 535  |
| LbrM32_V2.3840 | <i>L. braziliensis</i> | 156 | 1    | 156  |
| LbrM32_V2.3840 | <i>L. braziliensis</i> | 79  | 236  | 314  |
| LbrM32_V2.3840 | <i>L. braziliensis</i> | 61  | 325  | 385  |
| LbrM32_V2.3840 | <i>L. braziliensis</i> | 95  | 528  | 622  |
| LbrM32_V2.3840 | <i>L. braziliensis</i> | 60  | 1016 | 1075 |
| LbrM32_V2.3850 | <i>L. braziliensis</i> | 73  | 1    | 73   |
| LbrM32_V2.3850 | <i>L. braziliensis</i> | 41  | 106  | 146  |
| LbrM32_V2.3850 | <i>L. braziliensis</i> | 41  | 106  | 146  |
| LbrM32_V2.3870 | <i>L. braziliensis</i> | 118 | 1    | 118  |

|                |                        |     |      |      |
|----------------|------------------------|-----|------|------|
| LbrM32_V2.3880 | <i>L. braziliensis</i> | 235 | 1    | 235  |
| LbrM32_V2.3880 | <i>L. braziliensis</i> | 66  | 255  | 320  |
| LbrM32_V2.3890 | <i>L. braziliensis</i> | 73  | 353  | 425  |
| LbrM32_V2.3940 | <i>L. braziliensis</i> | 72  | 286  | 357  |
| LbrM32_V2.3940 | <i>L. braziliensis</i> | 92  | 546  | 637  |
| LbrM32_V2.3940 | <i>L. braziliensis</i> | 66  | 663  | 728  |
| LbrM32_V2.3950 | <i>L. braziliensis</i> | 49  | 1    | 49   |
| LbrM32_V2.3950 | <i>L. braziliensis</i> | 44  | 92   | 135  |
| LbrM32_V2.3950 | <i>L. braziliensis</i> | 44  | 92   | 135  |
| LbrM32_V2.3990 | <i>L. braziliensis</i> | 54  | 54   | 107  |
| LbrM32_V2.4010 | <i>L. braziliensis</i> | 70  | 63   | 132  |
| LbrM32_V2.4020 | <i>L. braziliensis</i> | 63  | 1    | 63   |
| LbrM32_V2.4020 | <i>L. braziliensis</i> | 48  | 96   | 143  |
| LbrM32_V2.4020 | <i>L. braziliensis</i> | 48  | 96   | 143  |
| LbrM32_V2.4040 | <i>L. braziliensis</i> | 46  | 31   | 76   |
| LbrM32_V2.4050 | <i>L. braziliensis</i> | 44  | 112  | 155  |
| LbrM32_V2.4050 | <i>L. braziliensis</i> | 56  | 321  | 376  |
| LbrM32_V2.4090 | <i>L. braziliensis</i> | 178 | 1    | 178  |
| LbrM32_V2.4090 | <i>L. braziliensis</i> | 67  | 222  | 288  |
| LbrM32_V2.4090 | <i>L. braziliensis</i> | 67  | 222  | 288  |
| LbrM32_V2.4100 | <i>L. braziliensis</i> | 41  | 357  | 397  |
| LbrM32_V2.4110 | <i>L. braziliensis</i> | 43  | 589  | 631  |
| LbrM32_V2.4130 | <i>L. braziliensis</i> | 60  | 339  | 398  |
| LbrM32_V2.4140 | <i>L. braziliensis</i> | 63  | 198  | 260  |
| LbrM32_V2.4160 | <i>L. braziliensis</i> | 71  | 696  | 766  |
| LbrM32_V2.4170 | <i>L. braziliensis</i> | 54  | 99   | 152  |
| LbrM32_V2.4170 | <i>L. braziliensis</i> | 52  | 1262 | 1313 |
| LbrM32_V2.4170 | <i>L. braziliensis</i> | 52  | 1262 | 1313 |
| LbrM32_V2.4190 | <i>L. braziliensis</i> | 108 | 807  | 914  |
| LbrM32_V2.4220 | <i>L. braziliensis</i> | 58  | 123  | 180  |
| LbrM32_V2.4230 | <i>L. braziliensis</i> | 78  | 56   | 133  |
| LbrM33_V2.0010 | <i>L. braziliensis</i> | 54  | 769  | 822  |
| LbrM33_V2.0030 | <i>L. braziliensis</i> | 44  | 424  | 467  |
| LbrM33_V2.0040 | <i>L. braziliensis</i> | 80  | 246  | 325  |
| LbrM33_V2.0050 | <i>L. braziliensis</i> | 76  | 144  | 219  |
| LbrM33_V2.0060 | <i>L. braziliensis</i> | 102 | 1    | 102  |
| LbrM33_V2.0070 | <i>L. braziliensis</i> | 55  | 172  | 226  |
| LbrM33_V2.0070 | <i>L. braziliensis</i> | 74  | 334  | 407  |
| LbrM33_V2.0070 | <i>L. braziliensis</i> | 74  | 334  | 407  |
| LbrM33_V2.0080 | <i>L. braziliensis</i> | 74  | 101  | 174  |
| LbrM33_V2.0110 | <i>L. braziliensis</i> | 91  | 1    | 91   |
| LbrM33_V2.0120 | <i>L. braziliensis</i> | 102 | 89   | 190  |
| LbrM33_V2.0120 | <i>L. braziliensis</i> | 83  | 221  | 303  |
| LbrM33_V2.0130 | <i>L. braziliensis</i> | 107 | 223  | 329  |
| LbrM33_V2.0150 | <i>L. braziliensis</i> | 45  | 364  | 408  |
| LbrM33_V2.0160 | <i>L. braziliensis</i> | 86  | 194  | 279  |
| LbrM33_V2.0210 | <i>L. braziliensis</i> | 65  | 1    | 65   |



|                |                        |     |      |      |
|----------------|------------------------|-----|------|------|
| LbrM33_V2.0210 | <i>L. braziliensis</i> | 74  | 480  | 553  |
| LbrM33_V2.0210 | <i>L. braziliensis</i> | 80  | 807  | 886  |
| LbrM33_V2.0210 | <i>L. braziliensis</i> | 40  | 1111 | 1150 |
| LbrM33_V2.0210 | <i>L. braziliensis</i> | 61  | 1283 | 1343 |
| LbrM33_V2.0210 | <i>L. braziliensis</i> | 112 | 1374 | 1485 |
| LbrM33_V2.0220 | <i>L. braziliensis</i> | 146 | 115  | 260  |
| LbrM33_V2.0220 | <i>L. braziliensis</i> | 78  | 516  | 593  |
| LbrM33_V2.0220 | <i>L. braziliensis</i> | 78  | 516  | 593  |
| LbrM33_V2.0230 | <i>L. braziliensis</i> | 96  | 1    | 96   |
| LbrM33_V2.0240 | <i>L. braziliensis</i> | 74  | 156  | 229  |
| LbrM33_V2.0260 | <i>L. braziliensis</i> | 44  | 1    | 44   |
| LbrM33_V2.0260 | <i>L. braziliensis</i> | 53  | 131  | 183  |
| LbrM33_V2.0280 | <i>L. braziliensis</i> | 42  | 164  | 205  |
| LbrM33_V2.0280 | <i>L. braziliensis</i> | 42  | 299  | 340  |
| LbrM33_V2.0280 | <i>L. braziliensis</i> | 42  | 299  | 340  |
| LbrM33_V2.0290 | <i>L. braziliensis</i> | 74  | 14   | 87   |
| LbrM33_V2.0320 | <i>L. braziliensis</i> | 60  | 1    | 60   |
| LbrM33_V2.0320 | <i>L. braziliensis</i> | 44  | 131  | 174  |
| LbrM33_V2.0320 | <i>L. braziliensis</i> | 74  | 592  | 665  |
| LbrM33_V2.0330 | <i>L. braziliensis</i> | 58  | 163  | 220  |
| LbrM33_V2.0340 | <i>L. braziliensis</i> | 104 | 176  | 279  |
| LbrM33_V2.0340 | <i>L. braziliensis</i> | 58  | 508  | 565  |
| LbrM33_V2.0350 | <i>L. braziliensis</i> | 58  | 183  | 240  |
| LbrM33_V2.0360 | <i>L. braziliensis</i> | 188 | 1    | 188  |
| LbrM33_V2.0360 | <i>L. braziliensis</i> | 107 | 233  | 339  |
| LbrM33_V2.0380 | <i>L. braziliensis</i> | 190 | 66   | 255  |
| LbrM33_V2.0390 | <i>L. braziliensis</i> | 41  | 1    | 41   |
| LbrM33_V2.0400 | <i>L. braziliensis</i> | 51  | 875  | 925  |
| LbrM33_V2.0420 | <i>L. braziliensis</i> | 51  | 216  | 266  |
| LbrM33_V2.0420 | <i>L. braziliensis</i> | 93  | 561  | 653  |
| LbrM33_V2.0420 | <i>L. braziliensis</i> | 68  | 674  | 741  |
| LbrM33_V2.0430 | <i>L. braziliensis</i> | 43  | 109  | 151  |
| LbrM33_V2.0430 | <i>L. braziliensis</i> | 45  | 176  | 220  |
| LbrM33_V2.0430 | <i>L. braziliensis</i> | 45  | 176  | 220  |
| LbrM33_V2.0440 | <i>L. braziliensis</i> | 60  | 88   | 147  |
| LbrM33_V2.0450 | <i>L. braziliensis</i> | 45  | 33   | 77   |
| LbrM33_V2.0450 | <i>L. braziliensis</i> | 113 | 104  | 216  |
| LbrM33_V2.0460 | <i>L. braziliensis</i> | 53  | 489  | 541  |
| LbrM33_V2.0470 | <i>L. braziliensis</i> | 228 | 18   | 245  |
| LbrM33_V2.0470 | <i>L. braziliensis</i> | 65  | 257  | 321  |
| LbrM33_V2.0480 | <i>L. braziliensis</i> | 95  | 34   | 128  |
| LbrM33_V2.0480 | <i>L. braziliensis</i> | 96  | 152  | 247  |
| LbrM33_V2.0480 | <i>L. braziliensis</i> | 55  | 297  | 351  |
| LbrM33_V2.0480 | <i>L. braziliensis</i> | 40  | 420  | 459  |
| LbrM33_V2.0480 | <i>L. braziliensis</i> | 93  | 582  | 674  |
| LbrM33_V2.0480 | <i>L. braziliensis</i> | 61  | 800  | 860  |
| LbrM33_V2.0500 | <i>L. braziliensis</i> | 43  | 16   | 58   |

|                |                        |     |      |      |
|----------------|------------------------|-----|------|------|
| LbrM33_V2.0500 | <i>L. braziliensis</i> | 52  | 294  | 345  |
| LbrM33_V2.0500 | <i>L. braziliensis</i> | 56  | 640  | 695  |
| LbrM33_V2.0530 | <i>L. braziliensis</i> | 90  | 75   | 164  |
| LbrM33_V2.0530 | <i>L. braziliensis</i> | 73  | 201  | 273  |
| LbrM33_V2.0530 | <i>L. braziliensis</i> | 85  | 491  | 575  |
| LbrM33_V2.0530 | <i>L. braziliensis</i> | 55  | 680  | 734  |
| LbrM33_V2.0550 | <i>L. braziliensis</i> | 76  | 135  | 210  |
| LbrM33_V2.0550 | <i>L. braziliensis</i> | 93  | 339  | 431  |
| LbrM33_V2.0560 | <i>L. braziliensis</i> | 77  | 49   | 125  |
| LbrM33_V2.0560 | <i>L. braziliensis</i> | 41  | 653  | 693  |
| LbrM33_V2.0560 | <i>L. braziliensis</i> | 46  | 765  | 810  |
| LbrM33_V2.0560 | <i>L. braziliensis</i> | 46  | 977  | 1022 |
| LbrM33_V2.0560 | <i>L. braziliensis</i> | 45  | 1106 | 1150 |
| LbrM33_V2.0560 | <i>L. braziliensis</i> | 48  | 1310 | 1357 |
| LbrM33_V2.0560 | <i>L. braziliensis</i> | 51  | 1420 | 1470 |
| LbrM33_V2.0560 | <i>L. braziliensis</i> | 89  | 1862 | 1950 |
| LbrM33_V2.0590 | <i>L. braziliensis</i> | 50  | 86   | 135  |
| LbrM33_V2.0590 | <i>L. braziliensis</i> | 78  | 495  | 572  |
| LbrM33_V2.0600 | <i>L. braziliensis</i> | 310 | 9    | 318  |
| LbrM33_V2.0600 | <i>L. braziliensis</i> | 59  | 320  | 378  |
| LbrM33_V2.0610 | <i>L. braziliensis</i> | 115 | 172  | 286  |
| LbrM33_V2.0610 | <i>L. braziliensis</i> | 312 | 304  | 615  |
| LbrM33_V2.0620 | <i>L. braziliensis</i> | 68  | 1    | 68   |
| LbrM33_V2.0620 | <i>L. braziliensis</i> | 191 | 76   | 266  |
| LbrM33_V2.0620 | <i>L. braziliensis</i> | 181 | 310  | 490  |
| LbrM33_V2.0620 | <i>L. braziliensis</i> | 91  | 552  | 642  |
| LbrM33_V2.0620 | <i>L. braziliensis</i> | 188 | 658  | 845  |
| LbrM33_V2.0630 | <i>L. braziliensis</i> | 45  | 146  | 190  |
| LbrM33_V2.0660 | <i>L. braziliensis</i> | 63  | 57   | 119  |
| LbrM33_V2.0660 | <i>L. braziliensis</i> | 86  | 152  | 237  |
| LbrM33_V2.0660 | <i>L. braziliensis</i> | 86  | 152  | 237  |
| LbrM33_V2.0670 | <i>L. braziliensis</i> | 55  | 276  | 330  |
| LbrM33_V2.0690 | <i>L. braziliensis</i> | 219 | 32   | 250  |
| LbrM33_V2.0690 | <i>L. braziliensis</i> | 77  | 384  | 460  |
| LbrM33_V2.0690 | <i>L. braziliensis</i> | 555 | 473  | 1027 |
| LbrM33_V2.0690 | <i>L. braziliensis</i> | 364 | 1043 | 1406 |
| LbrM33_V2.0710 | <i>L. braziliensis</i> | 280 | 72   | 351  |
| LbrM33_V2.0710 | <i>L. braziliensis</i> | 53  | 390  | 442  |
| LbrM33_V2.0710 | <i>L. braziliensis</i> | 44  | 788  | 831  |
| LbrM33_V2.0720 | <i>L. braziliensis</i> | 51  | 1    | 51   |
| LbrM33_V2.0740 | <i>L. braziliensis</i> | 46  | 196  | 241  |
| LbrM33_V2.0750 | <i>L. braziliensis</i> | 46  | 180  | 225  |
| LbrM33_V2.0760 | <i>L. braziliensis</i> | 74  | 86   | 159  |
| LbrM33_V2.0770 | <i>L. braziliensis</i> | 135 | 1    | 135  |
| LbrM33_V2.0780 | <i>L. braziliensis</i> | 92  | 177  | 268  |
| LbrM33_V2.0780 | <i>L. braziliensis</i> | 49  | 274  | 322  |
| LbrM33_V2.0790 | <i>L. braziliensis</i> | 164 | 145  | 308  |

|                |                        |     |      |      |
|----------------|------------------------|-----|------|------|
| LbrM33_V2.0790 | <i>L. braziliensis</i> | 52  | 487  | 538  |
| LbrM33_V2.0790 | <i>L. braziliensis</i> | 59  | 685  | 743  |
| LbrM33_V2.0800 | <i>L. braziliensis</i> | 70  | 1    | 70   |
| LbrM33_V2.0800 | <i>L. braziliensis</i> | 40  | 120  | 159  |
| LbrM33_V2.0800 | <i>L. braziliensis</i> | 59  | 183  | 241  |
| LbrM33_V2.0800 | <i>L. braziliensis</i> | 94  | 255  | 348  |
| LbrM33_V2.0810 | <i>L. braziliensis</i> | 51  | 9    | 59   |
| LbrM33_V2.0810 | <i>L. braziliensis</i> | 185 | 68   | 252  |
| LbrM33_V2.0810 | <i>L. braziliensis</i> | 148 | 255  | 402  |
| LbrM33_V2.0820 | <i>L. braziliensis</i> | 59  | 115  | 173  |
| LbrM33_V2.0820 | <i>L. braziliensis</i> | 237 | 316  | 552  |
| LbrM33_V2.0820 | <i>L. braziliensis</i> | 242 | 640  | 881  |
| LbrM33_V2.0840 | <i>L. braziliensis</i> | 120 | 130  | 249  |
| LbrM33_V2.0900 | <i>L. braziliensis</i> | 54  | 1    | 54   |
| LbrM33_V2.0900 | <i>L. braziliensis</i> | 46  | 81   | 126  |
| LbrM33_V2.0900 | <i>L. braziliensis</i> | 283 | 179  | 461  |
| LbrM33_V2.0910 | <i>L. braziliensis</i> | 220 | 33   | 252  |
| LbrM33_V2.0910 | <i>L. braziliensis</i> | 54  | 274  | 327  |
| LbrM33_V2.0910 | <i>L. braziliensis</i> | 332 | 600  | 931  |
| LbrM33_V2.0920 | <i>L. braziliensis</i> | 40  | 404  | 443  |
| LbrM33_V2.0930 | <i>L. braziliensis</i> | 40  | 404  | 443  |
| LbrM33_V2.0940 | <i>L. braziliensis</i> | 156 | 309  | 464  |
| LbrM33_V2.0950 | <i>L. braziliensis</i> | 40  | 184  | 223  |
| LbrM33_V2.0960 | <i>L. braziliensis</i> | 40  | 404  | 443  |
| LbrM33_V2.0970 | <i>L. braziliensis</i> | 55  | 1    | 55   |
| LbrM33_V2.0970 | <i>L. braziliensis</i> | 238 | 63   | 300  |
| LbrM33_V2.0970 | <i>L. braziliensis</i> | 343 | 341  | 683  |
| LbrM33_V2.0970 | <i>L. braziliensis</i> | 70  | 762  | 831  |
| LbrM33_V2.0970 | <i>L. braziliensis</i> | 93  | 943  | 1035 |
| LbrM33_V2.0970 | <i>L. braziliensis</i> | 149 | 1121 | 1269 |
| LbrM33_V2.0980 | <i>L. braziliensis</i> | 92  | 224  | 315  |
| LbrM33_V2.0980 | <i>L. braziliensis</i> | 44  | 354  | 397  |
| LbrM33_V2.0980 | <i>L. braziliensis</i> | 51  | 707  | 757  |
| LbrM33_V2.0980 | <i>L. braziliensis</i> | 71  | 1049 | 1119 |
| LbrM33_V2.0980 | <i>L. braziliensis</i> | 107 | 1519 | 1625 |
| LbrM33_V2.1010 | <i>L. braziliensis</i> | 40  | 138  | 177  |
| LbrM33_V2.1020 | <i>L. braziliensis</i> | 51  | 559  | 609  |
| LbrM33_V2.1030 | <i>L. braziliensis</i> | 205 | 1    | 205  |
| LbrM33_V2.1030 | <i>L. braziliensis</i> | 74  | 237  | 310  |
| LbrM33_V2.1030 | <i>L. braziliensis</i> | 198 | 513  | 710  |
| LbrM33_V2.1040 | <i>L. braziliensis</i> | 299 | 329  | 627  |
| LbrM33_V2.1040 | <i>L. braziliensis</i> | 62  | 750  | 811  |
| LbrM33_V2.1040 | <i>L. braziliensis</i> | 47  | 818  | 864  |
| LbrM33_V2.1050 | <i>L. braziliensis</i> | 53  | 80   | 132  |
| LbrM33_V2.1050 | <i>L. braziliensis</i> | 53  | 365  | 417  |
| LbrM33_V2.1050 | <i>L. braziliensis</i> | 53  | 365  | 417  |
| LbrM33_V2.1060 | <i>L. braziliensis</i> | 197 | 1    | 197  |

|                |                        |     |      |      |
|----------------|------------------------|-----|------|------|
| LbrM33_V2.1060 | <i>L. braziliensis</i> | 89  | 266  | 354  |
| LbrM33_V2.1070 | <i>L. braziliensis</i> | 52  | 50   | 101  |
| LbrM33_V2.1070 | <i>L. braziliensis</i> | 46  | 120  | 165  |
| LbrM33_V2.1070 | <i>L. braziliensis</i> | 45  | 254  | 298  |
| LbrM33_V2.1090 | <i>L. braziliensis</i> | 91  | 316  | 406  |
| LbrM33_V2.1090 | <i>L. braziliensis</i> | 88  | 493  | 580  |
| LbrM33_V2.1120 | <i>L. braziliensis</i> | 55  | 1    | 55   |
| LbrM33_V2.1120 | <i>L. braziliensis</i> | 135 | 102  | 236  |
| LbrM33_V2.1120 | <i>L. braziliensis</i> | 65  | 277  | 341  |
| LbrM33_V2.1120 | <i>L. braziliensis</i> | 73  | 518  | 590  |
| LbrM33_V2.1120 | <i>L. braziliensis</i> | 61  | 730  | 790  |
| LbrM33_V2.1130 | <i>L. braziliensis</i> | 91  | 1    | 91   |
| LbrM33_V2.1130 | <i>L. braziliensis</i> | 381 | 170  | 550  |
| LbrM33_V2.1140 | <i>L. braziliensis</i> | 280 | 36   | 315  |
| LbrM33_V2.1140 | <i>L. braziliensis</i> | 51  | 430  | 480  |
| LbrM33_V2.1140 | <i>L. braziliensis</i> | 102 | 642  | 743  |
| LbrM33_V2.1140 | <i>L. braziliensis</i> | 150 | 805  | 954  |
| LbrM33_V2.1140 | <i>L. braziliensis</i> | 60  | 1021 | 1080 |
| LbrM33_V2.1150 | <i>L. braziliensis</i> | 95  | 90   | 184  |
| LbrM33_V2.1150 | <i>L. braziliensis</i> | 140 | 365  | 504  |
| LbrM33_V2.1150 | <i>L. braziliensis</i> | 51  | 859  | 909  |
| LbrM33_V2.1150 | <i>L. braziliensis</i> | 80  | 1032 | 1111 |
| LbrM33_V2.1150 | <i>L. braziliensis</i> | 44  | 1286 | 1329 |
| LbrM33_V2.1150 | <i>L. braziliensis</i> | 74  | 1423 | 1496 |
| LbrM33_V2.1150 | <i>L. braziliensis</i> | 154 | 1575 | 1728 |
| LbrM33_V2.1150 | <i>L. braziliensis</i> | 107 | 1742 | 1848 |
| LbrM33_V2.1170 | <i>L. braziliensis</i> | 71  | 120  | 190  |
| LbrM33_V2.1170 | <i>L. braziliensis</i> | 154 | 375  | 528  |
| LbrM33_V2.1180 | <i>L. braziliensis</i> | 64  | 1    | 64   |
| LbrM33_V2.1200 | <i>L. braziliensis</i> | 44  | 439  | 482  |
| LbrM33_V2.1200 | <i>L. braziliensis</i> | 50  | 728  | 777  |
| LbrM33_V2.1200 | <i>L. braziliensis</i> | 50  | 728  | 777  |
| LbrM33_V2.1210 | <i>L. braziliensis</i> | 328 | 1    | 328  |
| LbrM33_V2.1210 | <i>L. braziliensis</i> | 147 | 340  | 486  |
| LbrM33_V2.1210 | <i>L. braziliensis</i> | 107 | 509  | 615  |
| LbrM33_V2.1210 | <i>L. braziliensis</i> | 55  | 795  | 849  |
| LbrM33_V2.1220 | <i>L. braziliensis</i> | 52  | 398  | 449  |
| LbrM33_V2.1230 | <i>L. braziliensis</i> | 160 | 1    | 160  |
| LbrM33_V2.1240 | <i>L. braziliensis</i> | 70  | 1    | 70   |
| LbrM33_V2.1240 | <i>L. braziliensis</i> | 109 | 113  | 221  |
| LbrM33_V2.1240 | <i>L. braziliensis</i> | 54  | 402  | 455  |
| LbrM33_V2.1250 | <i>L. braziliensis</i> | 48  | 89   | 136  |
| LbrM33_V2.1260 | <i>L. braziliensis</i> | 41  | 408  | 448  |
| LbrM33_V2.1260 | <i>L. braziliensis</i> | 57  | 855  | 911  |
| LbrM33_V2.1260 | <i>L. braziliensis</i> | 57  | 855  | 911  |
| LbrM33_V2.1280 | <i>L. braziliensis</i> | 45  | 130  | 174  |
| LbrM33_V2.1280 | <i>L. braziliensis</i> | 53  | 196  | 248  |

|                |                        |     |      |      |
|----------------|------------------------|-----|------|------|
| LbrM33_V2.1280 | <i>L. braziliensis</i> | 53  | 196  | 248  |
| LbrM33_V2.1300 | <i>L. braziliensis</i> | 81  | 45   | 125  |
| LbrM33_V2.1300 | <i>L. braziliensis</i> | 112 | 278  | 389  |
| LbrM33_V2.1300 | <i>L. braziliensis</i> | 272 | 424  | 695  |
| LbrM33_V2.1310 | <i>L. braziliensis</i> | 67  | 98   | 164  |
| LbrM33_V2.1310 | <i>L. braziliensis</i> | 54  | 184  | 237  |
| LbrM33_V2.1310 | <i>L. braziliensis</i> | 141 | 313  | 453  |
| LbrM33_V2.1310 | <i>L. braziliensis</i> | 119 | 500  | 618  |
| LbrM33_V2.1310 | <i>L. braziliensis</i> | 122 | 632  | 753  |
| LbrM33_V2.1320 | <i>L. braziliensis</i> | 217 | 1    | 217  |
| LbrM33_V2.1320 | <i>L. braziliensis</i> | 68  | 243  | 310  |
| LbrM33_V2.1330 | <i>L. braziliensis</i> | 109 | 546  | 654  |
| LbrM33_V2.1350 | <i>L. braziliensis</i> | 95  | 151  | 245  |
| LbrM33_V2.1360 | <i>L. braziliensis</i> | 75  | 24   | 98   |
| LbrM33_V2.1360 | <i>L. braziliensis</i> | 54  | 107  | 160  |
| LbrM33_V2.1360 | <i>L. braziliensis</i> | 63  | 205  | 267  |
| LbrM33_V2.1360 | <i>L. braziliensis</i> | 109 | 274  | 382  |
| LbrM33_V2.1380 | <i>L. braziliensis</i> | 91  | 1    | 91   |
| LbrM33_V2.1380 | <i>L. braziliensis</i> | 59  | 94   | 152  |
| LbrM33_V2.1380 | <i>L. braziliensis</i> | 55  | 184  | 238  |
| LbrM33_V2.1380 | <i>L. braziliensis</i> | 106 | 301  | 406  |
| LbrM33_V2.1380 | <i>L. braziliensis</i> | 42  | 454  | 495  |
| LbrM33_V2.1380 | <i>L. braziliensis</i> | 63  | 740  | 802  |
| LbrM33_V2.1380 | <i>L. braziliensis</i> | 40  | 831  | 870  |
| LbrM33_V2.1380 | <i>L. braziliensis</i> | 80  | 1114 | 1193 |
| LbrM33_V2.1390 | <i>L. braziliensis</i> | 152 | 37   | 188  |
| LbrM33_V2.1390 | <i>L. braziliensis</i> | 42  | 216  | 257  |
| LbrM33_V2.1390 | <i>L. braziliensis</i> | 71  | 355  | 425  |
| LbrM33_V2.1400 | <i>L. braziliensis</i> | 59  | 481  | 539  |
| LbrM33_V2.1400 | <i>L. braziliensis</i> | 103 | 735  | 837  |
| LbrM33_V2.1400 | <i>L. braziliensis</i> | 103 | 735  | 837  |
| LbrM33_V2.1410 | <i>L. braziliensis</i> | 82  | 409  | 490  |
| LbrM33_V2.1410 | <i>L. braziliensis</i> | 45  | 568  | 612  |
| LbrM33_V2.1420 | <i>L. braziliensis</i> | 88  | 196  | 283  |
| LbrM33_V2.1430 | <i>L. braziliensis</i> | 108 | 159  | 266  |
| LbrM33_V2.1430 | <i>L. braziliensis</i> | 118 | 270  | 387  |
| LbrM33_V2.1430 | <i>L. braziliensis</i> | 77  | 427  | 503  |
| LbrM33_V2.1430 | <i>L. braziliensis</i> | 58  | 550  | 607  |
| LbrM33_V2.1440 | <i>L. braziliensis</i> | 213 | 422  | 634  |
| LbrM33_V2.1450 | <i>L. braziliensis</i> | 180 | 513  | 692  |
| LbrM33_V2.1450 | <i>L. braziliensis</i> | 77  | 700  | 776  |
| LbrM33_V2.1460 | <i>L. braziliensis</i> | 217 | 1    | 217  |
| LbrM33_V2.1480 | <i>L. braziliensis</i> | 138 | 239  | 376  |
| LbrM33_V2.1480 | <i>L. braziliensis</i> | 361 | 403  | 763  |
| LbrM33_V2.1490 | <i>L. braziliensis</i> | 55  | 245  | 299  |
| LbrM33_V2.1500 | <i>L. braziliensis</i> | 46  | 17   | 62   |
| LbrM33_V2.1510 | <i>L. braziliensis</i> | 113 | 1    | 113  |

|                |                        |     |      |      |
|----------------|------------------------|-----|------|------|
| LbrM33_V2.1510 | <i>L. braziliensis</i> | 67  | 523  | 589  |
| LbrM33_V2.1520 | <i>L. braziliensis</i> | 42  | 316  | 357  |
| LbrM33_V2.1530 | <i>L. braziliensis</i> | 164 | 1    | 164  |
| LbrM33_V2.1560 | <i>L. braziliensis</i> | 54  | 454  | 507  |
| LbrM33_V2.1570 | <i>L. braziliensis</i> | 122 | 37   | 158  |
| LbrM33_V2.1590 | <i>L. braziliensis</i> | 122 | 37   | 158  |
| LbrM33_V2.1640 | <i>L. braziliensis</i> | 44  | 189  | 232  |
| LbrM33_V2.1640 | <i>L. braziliensis</i> | 76  | 281  | 356  |
| LbrM33_V2.1640 | <i>L. braziliensis</i> | 76  | 281  | 356  |
| LbrM33_V2.1650 | <i>L. braziliensis</i> | 64  | 345  | 408  |
| LbrM33_V2.1660 | <i>L. braziliensis</i> | 114 | 48   | 161  |
| LbrM33_V2.1670 | <i>L. braziliensis</i> | 72  | 93   | 164  |
| LbrM33_V2.1670 | <i>L. braziliensis</i> | 89  | 257  | 345  |
| LbrM33_V2.1670 | <i>L. braziliensis</i> | 259 | 378  | 636  |
| LbrM33_V2.1670 | <i>L. braziliensis</i> | 172 | 699  | 870  |
| LbrM33_V2.1670 | <i>L. braziliensis</i> | 100 | 980  | 1079 |
| LbrM33_V2.1670 | <i>L. braziliensis</i> | 89  | 1140 | 1228 |
| LbrM33_V2.1670 | <i>L. braziliensis</i> | 335 | 1253 | 1587 |
| LbrM33_V2.1670 | <i>L. braziliensis</i> | 140 | 1601 | 1740 |
| LbrM33_V2.1670 | <i>L. braziliensis</i> | 202 | 1766 | 1967 |
| LbrM33_V2.1680 | <i>L. braziliensis</i> | 113 | 56   | 168  |
| LbrM33_V2.1680 | <i>L. braziliensis</i> | 60  | 220  | 279  |
| LbrM33_V2.1680 | <i>L. braziliensis</i> | 60  | 220  | 279  |
| LbrM33_V2.1700 | <i>L. braziliensis</i> | 41  | 51   | 91   |
| LbrM33_V2.1700 | <i>L. braziliensis</i> | 70  | 112  | 181  |
| LbrM33_V2.1700 | <i>L. braziliensis</i> | 50  | 279  | 328  |
| LbrM33_V2.1700 | <i>L. braziliensis</i> | 79  | 338  | 416  |
| LbrM33_V2.1710 | <i>L. braziliensis</i> | 78  | 57   | 134  |
| LbrM33_V2.1710 | <i>L. braziliensis</i> | 184 | 143  | 326  |
| LbrM33_V2.1710 | <i>L. braziliensis</i> | 134 | 392  | 525  |
| LbrM33_V2.1750 | <i>L. braziliensis</i> | 101 | 7    | 107  |
| LbrM33_V2.1750 | <i>L. braziliensis</i> | 115 | 171  | 285  |
| LbrM33_V2.1750 | <i>L. braziliensis</i> | 85  | 328  | 412  |
| LbrM33_V2.1750 | <i>L. braziliensis</i> | 89  | 485  | 573  |
| LbrM33_V2.1750 | <i>L. braziliensis</i> | 53  | 607  | 659  |
| LbrM33_V2.1750 | <i>L. braziliensis</i> | 287 | 676  | 962  |
| LbrM33_V2.1750 | <i>L. braziliensis</i> | 70  | 1216 | 1285 |
| LbrM33_V2.1750 | <i>L. braziliensis</i> | 206 | 1493 | 1698 |
| LbrM33_V2.1750 | <i>L. braziliensis</i> | 48  | 1753 | 1800 |
| LbrM33_V2.1750 | <i>L. braziliensis</i> | 68  | 1928 | 1995 |
| LbrM33_V2.1750 | <i>L. braziliensis</i> | 362 | 2146 | 2507 |
| LbrM33_V2.1750 | <i>L. braziliensis</i> | 76  | 2594 | 2669 |
| LbrM33_V2.1750 | <i>L. braziliensis</i> | 135 | 2769 | 2903 |
| LbrM33_V2.1750 | <i>L. braziliensis</i> | 48  | 2963 | 3010 |
| LbrM33_V2.1760 | <i>L. braziliensis</i> | 56  | 380  | 435  |
| LbrM33_V2.1760 | <i>L. braziliensis</i> | 47  | 720  | 766  |
| LbrM33_V2.1760 | <i>L. braziliensis</i> | 47  | 720  | 766  |

|                |                        |     |      |      |
|----------------|------------------------|-----|------|------|
| LbrM33_V2.1770 | <i>L. braziliensis</i> | 41  | 154  | 194  |
| LbrM33_V2.1770 | <i>L. braziliensis</i> | 50  | 244  | 293  |
| LbrM33_V2.1770 | <i>L. braziliensis</i> | 52  | 329  | 380  |
| LbrM33_V2.1770 | <i>L. braziliensis</i> | 40  | 454  | 493  |
| LbrM33_V2.1770 | <i>L. braziliensis</i> | 45  | 543  | 587  |
| LbrM33_V2.1810 | <i>L. braziliensis</i> | 51  | 132  | 182  |
| LbrM33_V2.1810 | <i>L. braziliensis</i> | 42  | 213  | 254  |
| LbrM33_V2.1810 | <i>L. braziliensis</i> | 42  | 213  | 254  |
| LbrM33_V2.1820 | <i>L. braziliensis</i> | 159 | 515  | 673  |
| LbrM33_V2.1840 | <i>L. braziliensis</i> | 42  | 109  | 150  |
| LbrM33_V2.1840 | <i>L. braziliensis</i> | 60  | 270  | 329  |
| LbrM33_V2.1840 | <i>L. braziliensis</i> | 81  | 431  | 511  |
| LbrM33_V2.1850 | <i>L. braziliensis</i> | 50  | 133  | 182  |
| LbrM33_V2.1870 | <i>L. braziliensis</i> | 55  | 34   | 88   |
| LbrM33_V2.1870 | <i>L. braziliensis</i> | 58  | 226  | 283  |
| LbrM33_V2.1870 | <i>L. braziliensis</i> | 50  | 308  | 357  |
| LbrM33_V2.1870 | <i>L. braziliensis</i> | 53  | 713  | 765  |
| LbrM33_V2.1870 | <i>L. braziliensis</i> | 61  | 806  | 866  |
| LbrM33_V2.1970 | <i>L. braziliensis</i> | 41  | 111  | 151  |
| LbrM33_V2.1970 | <i>L. braziliensis</i> | 49  | 868  | 916  |
| LbrM33_V2.1970 | <i>L. braziliensis</i> | 49  | 868  | 916  |
| LbrM33_V2.1980 | <i>L. braziliensis</i> | 49  | 303  | 351  |
| LbrM33_V2.2000 | <i>L. braziliensis</i> | 53  | 846  | 898  |
| LbrM33_V2.2040 | <i>L. braziliensis</i> | 92  | 1    | 92   |
| LbrM33_V2.2040 | <i>L. braziliensis</i> | 110 | 291  | 400  |
| LbrM33_V2.2040 | <i>L. braziliensis</i> | 53  | 1099 | 1151 |
| LbrM33_V2.2040 | <i>L. braziliensis</i> | 98  | 1529 | 1626 |
| LbrM33_V2.2090 | <i>L. braziliensis</i> | 53  | 303  | 355  |
| LbrM33_V2.2090 | <i>L. braziliensis</i> | 307 | 389  | 695  |
| LbrM33_V2.2090 | <i>L. braziliensis</i> | 165 | 698  | 862  |
| LbrM33_V2.2090 | <i>L. braziliensis</i> | 71  | 881  | 951  |
| LbrM33_V2.2120 | <i>L. braziliensis</i> | 59  | 62   | 120  |
| LbrM33_V2.2140 | <i>L. braziliensis</i> | 56  | 365  | 420  |
| LbrM33_V2.2140 | <i>L. braziliensis</i> | 149 | 504  | 652  |
| LbrM33_V2.2160 | <i>L. braziliensis</i> | 68  | 278  | 345  |
| LbrM33_V2.2160 | <i>L. braziliensis</i> | 93  | 455  | 547  |
| LbrM33_V2.2180 | <i>L. braziliensis</i> | 132 | 1    | 132  |
| LbrM33_V2.2180 | <i>L. braziliensis</i> | 69  | 136  | 204  |
| LbrM33_V2.2180 | <i>L. braziliensis</i> | 69  | 136  | 204  |
| LbrM33_V2.2190 | <i>L. braziliensis</i> | 124 | 1    | 124  |
| LbrM33_V2.2190 | <i>L. braziliensis</i> | 41  | 216  | 256  |
| LbrM33_V2.2230 | <i>L. braziliensis</i> | 54  | 10   | 63   |
| LbrM33_V2.2230 | <i>L. braziliensis</i> | 57  | 232  | 288  |
| LbrM33_V2.2230 | <i>L. braziliensis</i> | 133 | 555  | 687  |
| LbrM33_V2.2240 | <i>L. braziliensis</i> | 342 | 1    | 342  |
| LbrM33_V2.2240 | <i>L. braziliensis</i> | 41  | 389  | 429  |
| LbrM33_V2.2250 | <i>L. braziliensis</i> | 70  | 194  | 263  |

|                |                        |     |      |      |
|----------------|------------------------|-----|------|------|
| LbrM33_V2.2250 | <i>L. braziliensis</i> | 106 | 335  | 440  |
| LbrM33_V2.2250 | <i>L. braziliensis</i> | 106 | 335  | 440  |
| LbrM33_V2.2270 | <i>L. braziliensis</i> | 126 | 142  | 267  |
| LbrM33_V2.2270 | <i>L. braziliensis</i> | 61  | 300  | 360  |
| LbrM33_V2.2270 | <i>L. braziliensis</i> | 89  | 451  | 539  |
| LbrM33_V2.2290 | <i>L. braziliensis</i> | 152 | 77   | 228  |
| LbrM33_V2.2300 | <i>L. braziliensis</i> | 198 | 94   | 291  |
| LbrM33_V2.2300 | <i>L. braziliensis</i> | 235 | 309  | 543  |
| LbrM33_V2.2300 | <i>L. braziliensis</i> | 93  | 757  | 849  |
| LbrM33_V2.2310 | <i>L. braziliensis</i> | 309 | 1    | 309  |
| LbrM33_V2.2310 | <i>L. braziliensis</i> | 132 | 536  | 667  |
| LbrM33_V2.2310 | <i>L. braziliensis</i> | 41  | 1044 | 1084 |
| LbrM33_V2.2330 | <i>L. braziliensis</i> | 40  | 192  | 231  |
| LbrM33_V2.2330 | <i>L. braziliensis</i> | 55  | 334  | 388  |
| LbrM33_V2.2330 | <i>L. braziliensis</i> | 55  | 334  | 388  |
| LbrM33_V2.2350 | <i>L. braziliensis</i> | 441 | 407  | 847  |
| LbrM33_V2.2350 | <i>L. braziliensis</i> | 122 | 864  | 985  |
| LbrM33_V2.2360 | <i>L. braziliensis</i> | 52  | 106  | 157  |
| LbrM33_V2.2360 | <i>L. braziliensis</i> | 43  | 285  | 327  |
| LbrM33_V2.2360 | <i>L. braziliensis</i> | 112 | 407  | 518  |
| LbrM33_V2.2360 | <i>L. braziliensis</i> | 67  | 557  | 623  |
| LbrM33_V2.2360 | <i>L. braziliensis</i> | 93  | 656  | 748  |
| LbrM33_V2.2370 | <i>L. braziliensis</i> | 130 | 61   | 190  |
| LbrM33_V2.2370 | <i>L. braziliensis</i> | 51  | 835  | 885  |
| LbrM33_V2.2370 | <i>L. braziliensis</i> | 51  | 835  | 885  |
| LbrM33_V2.2380 | <i>L. braziliensis</i> | 107 | 185  | 291  |
| LbrM33_V2.2380 | <i>L. braziliensis</i> | 63  | 364  | 426  |
| LbrM33_V2.2380 | <i>L. braziliensis</i> | 63  | 364  | 426  |
| LbrM33_V2.2390 | <i>L. braziliensis</i> | 179 | 1    | 179  |
| LbrM33_V2.2390 | <i>L. braziliensis</i> | 59  | 275  | 333  |
| LbrM33_V2.2400 | <i>L. braziliensis</i> | 145 | 1    | 145  |
| LbrM33_V2.2410 | <i>L. braziliensis</i> | 54  | 1    | 54   |
| LbrM33_V2.2410 | <i>L. braziliensis</i> | 54  | 105  | 158  |
| LbrM33_V2.2410 | <i>L. braziliensis</i> | 87  | 189  | 275  |
| LbrM33_V2.2410 | <i>L. braziliensis</i> | 196 | 388  | 583  |
| LbrM33_V2.2410 | <i>L. braziliensis</i> | 225 | 710  | 934  |
| LbrM33_V2.2420 | <i>L. braziliensis</i> | 46  | 401  | 446  |
| LbrM33_V2.2420 | <i>L. braziliensis</i> | 424 | 541  | 964  |
| LbrM33_V2.2430 | <i>L. braziliensis</i> | 191 | 125  | 315  |
| LbrM33_V2.2430 | <i>L. braziliensis</i> | 61  | 466  | 526  |
| LbrM33_V2.2430 | <i>L. braziliensis</i> | 61  | 466  | 526  |
| LbrM33_V2.2450 | <i>L. braziliensis</i> | 136 | 168  | 303  |
| LbrM33_V2.2450 | <i>L. braziliensis</i> | 107 | 493  | 599  |
| LbrM33_V2.2450 | <i>L. braziliensis</i> | 181 | 649  | 829  |
| LbrM33_V2.2450 | <i>L. braziliensis</i> | 268 | 1201 | 1468 |
| LbrM33_V2.2460 | <i>L. braziliensis</i> | 278 | 73   | 350  |
| LbrM33_V2.2460 | <i>L. braziliensis</i> | 98  | 374  | 471  |



|                |                        |     |      |      |
|----------------|------------------------|-----|------|------|
| LbrM33_V2.2460 | <i>L. braziliensis</i> | 55  | 480  | 534  |
| LbrM33_V2.2460 | <i>L. braziliensis</i> | 85  | 552  | 636  |
| LbrM33_V2.2460 | <i>L. braziliensis</i> | 82  | 852  | 933  |
| LbrM33_V2.2460 | <i>L. braziliensis</i> | 51  | 973  | 1023 |
| LbrM33_V2.2460 | <i>L. braziliensis</i> | 65  | 1050 | 1114 |
| LbrM33_V2.2460 | <i>L. braziliensis</i> | 107 | 1192 | 1298 |
| LbrM33_V2.2460 | <i>L. braziliensis</i> | 45  | 1334 | 1378 |
| LbrM33_V2.2470 | <i>L. braziliensis</i> | 187 | 13   | 199  |
| LbrM33_V2.2470 | <i>L. braziliensis</i> | 240 | 251  | 490  |
| LbrM33_V2.2470 | <i>L. braziliensis</i> | 73  | 528  | 600  |
| LbrM33_V2.2470 | <i>L. braziliensis</i> | 104 | 662  | 765  |
| LbrM33_V2.2470 | <i>L. braziliensis</i> | 56  | 793  | 848  |
| LbrM33_V2.2470 | <i>L. braziliensis</i> | 191 | 885  | 1075 |
| LbrM33_V2.2480 | <i>L. braziliensis</i> | 302 | 1    | 302  |
| LbrM33_V2.2480 | <i>L. braziliensis</i> | 72  | 326  | 397  |
| LbrM33_V2.2500 | <i>L. braziliensis</i> | 70  | 1    | 70   |
| LbrM33_V2.2500 | <i>L. braziliensis</i> | 83  | 72   | 154  |
| LbrM33_V2.2500 | <i>L. braziliensis</i> | 83  | 72   | 154  |
| LbrM33_V2.2510 | <i>L. braziliensis</i> | 182 | 1    | 182  |
| LbrM33_V2.2510 | <i>L. braziliensis</i> | 205 | 243  | 447  |
| LbrM33_V2.2510 | <i>L. braziliensis</i> | 144 | 452  | 595  |
| LbrM33_V2.2510 | <i>L. braziliensis</i> | 50  | 600  | 649  |
| LbrM33_V2.2520 | <i>L. braziliensis</i> | 52  | 1    | 52   |
| LbrM33_V2.2520 | <i>L. braziliensis</i> | 79  | 74   | 152  |
| LbrM33_V2.2540 | <i>L. braziliensis</i> | 85  | 114  | 198  |
| LbrM33_V2.2540 | <i>L. braziliensis</i> | 172 | 268  | 439  |
| LbrM33_V2.2550 | <i>L. braziliensis</i> | 77  | 155  | 231  |
| LbrM33_V2.2550 | <i>L. braziliensis</i> | 69  | 334  | 402  |
| LbrM33_V2.2550 | <i>L. braziliensis</i> | 42  | 617  | 658  |
| LbrM33_V2.2560 | <i>L. braziliensis</i> | 63  | 1    | 63   |
| LbrM33_V2.2560 | <i>L. braziliensis</i> | 689 | 78   | 766  |
| LbrM33_V2.2560 | <i>L. braziliensis</i> | 74  | 808  | 881  |
| LbrM33_V2.2570 | <i>L. braziliensis</i> | 41  | 603  | 643  |
| LbrM33_V2.2570 | <i>L. braziliensis</i> | 60  | 932  | 991  |
| LbrM33_V2.2570 | <i>L. braziliensis</i> | 60  | 932  | 991  |
| LbrM33_V2.2580 | <i>L. braziliensis</i> | 217 | 1    | 217  |
| LbrM33_V2.2580 | <i>L. braziliensis</i> | 62  | 286  | 347  |
| LbrM33_V2.2580 | <i>L. braziliensis</i> | 88  | 861  | 948  |
| LbrM33_V2.2580 | <i>L. braziliensis</i> | 43  | 1241 | 1283 |
| LbrM33_V2.2580 | <i>L. braziliensis</i> | 91  | 1289 | 1379 |
| LbrM33_V2.2580 | <i>L. braziliensis</i> | 137 | 1703 | 1839 |
| LbrM33_V2.2580 | <i>L. braziliensis</i> | 51  | 1871 | 1921 |
| LbrM33_V2.2600 | <i>L. braziliensis</i> | 47  | 75   | 121  |
| LbrM33_V2.2600 | <i>L. braziliensis</i> | 77  | 130  | 206  |
| LbrM33_V2.2600 | <i>L. braziliensis</i> | 146 | 213  | 358  |
| LbrM33_V2.2610 | <i>L. braziliensis</i> | 124 | 146  | 269  |
| LbrM33_V2.2610 | <i>L. braziliensis</i> | 73  | 616  | 688  |

|                |                        |     |      |      |
|----------------|------------------------|-----|------|------|
| LbrM33_V2.2620 | <i>L. braziliensis</i> | 61  | 1    | 61   |
| LbrM33_V2.2620 | <i>L. braziliensis</i> | 108 | 63   | 170  |
| LbrM33_V2.2620 | <i>L. braziliensis</i> | 180 | 176  | 355  |
| LbrM33_V2.2620 | <i>L. braziliensis</i> | 94  | 417  | 510  |
| LbrM33_V2.2620 | <i>L. braziliensis</i> | 81  | 536  | 616  |
| LbrM33_V2.2620 | <i>L. braziliensis</i> | 41  | 745  | 785  |
| LbrM33_V2.2620 | <i>L. braziliensis</i> | 160 | 842  | 1001 |
| LbrM33_V2.2620 | <i>L. braziliensis</i> | 81  | 1083 | 1163 |
| LbrM33_V2.2640 | <i>L. braziliensis</i> | 108 | 1    | 108  |
| LbrM33_V2.2640 | <i>L. braziliensis</i> | 119 | 611  | 729  |
| LbrM33_V2.2640 | <i>L. braziliensis</i> | 81  | 749  | 829  |
| LbrM33_V2.2650 | <i>L. braziliensis</i> | 45  | 1    | 45   |
| LbrM33_V2.2660 | <i>L. braziliensis</i> | 264 | 279  | 542  |
| LbrM33_V2.2680 | <i>L. braziliensis</i> | 184 | 1    | 184  |
| LbrM33_V2.2690 | <i>L. braziliensis</i> | 49  | 136  | 184  |
| LbrM33_V2.2700 | <i>L. braziliensis</i> | 57  | 525  | 581  |
| LbrM33_V2.2710 | <i>L. braziliensis</i> | 97  | 1    | 97   |
| LbrM33_V2.2710 | <i>L. braziliensis</i> | 133 | 190  | 322  |
| LbrM33_V2.2710 | <i>L. braziliensis</i> | 167 | 345  | 511  |
| LbrM33_V2.2720 | <i>L. braziliensis</i> | 66  | 341  | 406  |
| LbrM33_V2.2720 | <i>L. braziliensis</i> | 188 | 543  | 730  |
| LbrM33_V2.2720 | <i>L. braziliensis</i> | 81  | 760  | 840  |
| LbrM33_V2.2720 | <i>L. braziliensis</i> | 52  | 887  | 938  |
| LbrM33_V2.2720 | <i>L. braziliensis</i> | 101 | 1001 | 1101 |
| LbrM33_V2.2720 | <i>L. braziliensis</i> | 508 | 1138 | 1645 |
| LbrM33_V2.2730 | <i>L. braziliensis</i> | 74  | 262  | 335  |
| LbrM33_V2.2730 | <i>L. braziliensis</i> | 96  | 431  | 526  |
| LbrM33_V2.2730 | <i>L. braziliensis</i> | 59  | 986  | 1044 |
| LbrM33_V2.2760 | <i>L. braziliensis</i> | 65  | 40   | 104  |
| LbrM33_V2.2760 | <i>L. braziliensis</i> | 74  | 128  | 201  |
| LbrM33_V2.2760 | <i>L. braziliensis</i> | 59  | 307  | 365  |
| LbrM33_V2.2760 | <i>L. braziliensis</i> | 46  | 397  | 442  |
| LbrM33_V2.2760 | <i>L. braziliensis</i> | 46  | 446  | 491  |
| LbrM33_V2.2780 | <i>L. braziliensis</i> | 55  | 49   | 103  |
| LbrM33_V2.2780 | <i>L. braziliensis</i> | 67  | 250  | 316  |
| LbrM33_V2.2780 | <i>L. braziliensis</i> | 58  | 358  | 415  |
| LbrM33_V2.2800 | <i>L. braziliensis</i> | 71  | 1    | 71   |
| LbrM33_V2.2800 | <i>L. braziliensis</i> | 43  | 565  | 607  |
| LbrM33_V2.2800 | <i>L. braziliensis</i> | 61  | 1004 | 1064 |
| LbrM33_V2.2800 | <i>L. braziliensis</i> | 158 | 1094 | 1251 |
| LbrM33_V2.2800 | <i>L. braziliensis</i> | 42  | 1258 | 1299 |
| LbrM33_V2.2830 | <i>L. braziliensis</i> | 43  | 1    | 43   |
| LbrM33_V2.2830 | <i>L. braziliensis</i> | 48  | 210  | 257  |
| LbrM33_V2.2830 | <i>L. braziliensis</i> | 81  | 357  | 437  |
| LbrM33_V2.2830 | <i>L. braziliensis</i> | 176 | 500  | 675  |
| LbrM33_V2.2830 | <i>L. braziliensis</i> | 58  | 717  | 774  |
| LbrM33_V2.2830 | <i>L. braziliensis</i> | 260 | 870  | 1129 |

|                |                        |     |      |      |
|----------------|------------------------|-----|------|------|
| LbrM33_V2.2830 | <i>L. braziliensis</i> | 80  | 1156 | 1235 |
| LbrM33_V2.2830 | <i>L. braziliensis</i> | 43  | 1652 | 1694 |
| LbrM33_V2.2830 | <i>L. braziliensis</i> | 70  | 1923 | 1992 |
| LbrM33_V2.2860 | <i>L. braziliensis</i> | 74  | 1    | 74   |
| LbrM33_V2.2860 | <i>L. braziliensis</i> | 40  | 101  | 140  |
| LbrM33_V2.2860 | <i>L. braziliensis</i> | 43  | 255  | 297  |
| LbrM33_V2.2860 | <i>L. braziliensis</i> | 60  | 457  | 516  |
| LbrM33_V2.2870 | <i>L. braziliensis</i> | 88  | 251  | 338  |
| LbrM33_V2.2870 | <i>L. braziliensis</i> | 98  | 369  | 466  |
| LbrM33_V2.2870 | <i>L. braziliensis</i> | 129 | 520  | 648  |
| LbrM33_V2.2870 | <i>L. braziliensis</i> | 69  | 746  | 814  |
| LbrM33_V2.2870 | <i>L. braziliensis</i> | 141 | 910  | 1050 |
| LbrM33_V2.2880 | <i>L. braziliensis</i> | 46  | 751  | 796  |
| LbrM33_V2.2900 | <i>L. braziliensis</i> | 74  | 378  | 451  |
| LbrM33_V2.2910 | <i>L. braziliensis</i> | 117 | 172  | 288  |
| LbrM33_V2.2910 | <i>L. braziliensis</i> | 161 | 294  | 454  |
| LbrM33_V2.2910 | <i>L. braziliensis</i> | 143 | 525  | 667  |
| LbrM33_V2.2910 | <i>L. braziliensis</i> | 110 | 721  | 830  |
| LbrM33_V2.2910 | <i>L. braziliensis</i> | 55  | 1037 | 1091 |
| LbrM33_V2.2920 | <i>L. braziliensis</i> | 118 | 1    | 118  |
| LbrM33_V2.2930 | <i>L. braziliensis</i> | 46  | 178  | 223  |
| LbrM33_V2.2930 | <i>L. braziliensis</i> | 44  | 374  | 417  |
| LbrM33_V2.2930 | <i>L. braziliensis</i> | 61  | 667  | 727  |
| LbrM33_V2.2940 | <i>L. braziliensis</i> | 58  | 44   | 101  |
| LbrM33_V2.2940 | <i>L. braziliensis</i> | 43  | 299  | 341  |
| LbrM33_V2.2940 | <i>L. braziliensis</i> | 60  | 346  | 405  |
| LbrM33_V2.2940 | <i>L. braziliensis</i> | 126 | 603  | 728  |
| LbrM33_V2.2940 | <i>L. braziliensis</i> | 58  | 751  | 808  |
| LbrM33_V2.2940 | <i>L. braziliensis</i> | 51  | 857  | 907  |
| LbrM33_V2.2940 | <i>L. braziliensis</i> | 92  | 1059 | 1150 |
| LbrM33_V2.2950 | <i>L. braziliensis</i> | 65  | 17   | 81   |
| LbrM33_V2.2950 | <i>L. braziliensis</i> | 178 | 106  | 283  |
| LbrM33_V2.2950 | <i>L. braziliensis</i> | 369 | 347  | 715  |
| LbrM33_V2.2950 | <i>L. braziliensis</i> | 40  | 737  | 776  |
| LbrM33_V2.2950 | <i>L. braziliensis</i> | 183 | 838  | 1020 |
| LbrM33_V2.2950 | <i>L. braziliensis</i> | 120 | 1074 | 1193 |
| LbrM33_V2.2960 | <i>L. braziliensis</i> | 123 | 18   | 140  |
| LbrM33_V2.2960 | <i>L. braziliensis</i> | 167 | 173  | 339  |
| LbrM33_V2.2960 | <i>L. braziliensis</i> | 245 | 347  | 591  |
| LbrM33_V2.2960 | <i>L. braziliensis</i> | 153 | 689  | 841  |
| LbrM33_V2.2970 | <i>L. braziliensis</i> | 41  | 1    | 41   |
| LbrM33_V2.2970 | <i>L. braziliensis</i> | 81  | 135  | 215  |
| LbrM33_V2.2970 | <i>L. braziliensis</i> | 81  | 135  | 215  |
| LbrM33_V2.2980 | <i>L. braziliensis</i> | 65  | 542  | 606  |
| LbrM33_V2.2980 | <i>L. braziliensis</i> | 41  | 691  | 731  |
| LbrM33_V2.2980 | <i>L. braziliensis</i> | 43  | 746  | 788  |
| LbrM33_V2.2990 | <i>L. braziliensis</i> | 48  | 70   | 117  |

|                |                        |     |      |      |
|----------------|------------------------|-----|------|------|
| LbrM33_V2.3020 | <i>L. braziliensis</i> | 224 | 1    | 224  |
| LbrM33_V2.3030 | <i>L. braziliensis</i> | 51  | 46   | 96   |
| LbrM33_V2.3030 | <i>L. braziliensis</i> | 47  | 195  | 241  |
| LbrM33_V2.3030 | <i>L. braziliensis</i> | 42  | 301  | 342  |
| LbrM33_V2.3030 | <i>L. braziliensis</i> | 89  | 379  | 467  |
| LbrM33_V2.3030 | <i>L. braziliensis</i> | 49  | 582  | 630  |
| LbrM33_V2.3030 | <i>L. braziliensis</i> | 52  | 756  | 807  |
| LbrM33_V2.3030 | <i>L. braziliensis</i> | 61  | 917  | 977  |
| LbrM33_V2.3030 | <i>L. braziliensis</i> | 50  | 1014 | 1063 |
| LbrM33_V2.3030 | <i>L. braziliensis</i> | 40  | 1068 | 1107 |
| LbrM33_V2.3040 | <i>L. braziliensis</i> | 124 | 43   | 166  |
| LbrM33_V2.3040 | <i>L. braziliensis</i> | 181 | 254  | 434  |
| LbrM33_V2.3040 | <i>L. braziliensis</i> | 86  | 521  | 606  |
| LbrM33_V2.3060 | <i>L. braziliensis</i> | 101 | 300  | 400  |
| LbrM33_V2.3060 | <i>L. braziliensis</i> | 88  | 504  | 591  |
| LbrM33_V2.3060 | <i>L. braziliensis</i> | 189 | 704  | 892  |
| LbrM33_V2.3060 | <i>L. braziliensis</i> | 51  | 1001 | 1051 |
| LbrM33_V2.3060 | <i>L. braziliensis</i> | 139 | 1145 | 1283 |
| LbrM33_V2.3060 | <i>L. braziliensis</i> | 78  | 1795 | 1872 |
| LbrM33_V2.3060 | <i>L. braziliensis</i> | 148 | 2365 | 2512 |
| LbrM33_V2.3060 | <i>L. braziliensis</i> | 77  | 2567 | 2643 |
| LbrM33_V2.3060 | <i>L. braziliensis</i> | 194 | 2746 | 2939 |
| LbrM33_V2.3060 | <i>L. braziliensis</i> | 160 | 2965 | 3124 |
| LbrM33_V2.3060 | <i>L. braziliensis</i> | 174 | 3220 | 3393 |
| LbrM33_V2.3060 | <i>L. braziliensis</i> | 72  | 3744 | 3815 |
| LbrM33_V2.3060 | <i>L. braziliensis</i> | 63  | 3923 | 3985 |
| LbrM33_V2.3060 | <i>L. braziliensis</i> | 54  | 4381 | 4434 |
| LbrM33_V2.3060 | <i>L. braziliensis</i> | 56  | 4844 | 4899 |
| LbrM33_V2.3060 | <i>L. braziliensis</i> | 40  | 4941 | 4980 |
| LbrM33_V2.3070 | <i>L. braziliensis</i> | 72  | 187  | 258  |
| LbrM33_V2.3070 | <i>L. braziliensis</i> | 83  | 270  | 352  |
| LbrM33_V2.3080 | <i>L. braziliensis</i> | 40  | 23   | 62   |
| LbrM33_V2.3090 | <i>L. braziliensis</i> | 101 | 73   | 173  |
| LbrM33_V2.3090 | <i>L. braziliensis</i> | 68  | 248  | 315  |
| LbrM33_V2.3090 | <i>L. braziliensis</i> | 68  | 248  | 315  |
| LbrM33_V2.3100 | <i>L. braziliensis</i> | 221 | 77   | 297  |
| LbrM33_V2.3100 | <i>L. braziliensis</i> | 56  | 493  | 548  |
| LbrM33_V2.3120 | <i>L. braziliensis</i> | 160 | 38   | 197  |
| LbrM33_V2.3120 | <i>L. braziliensis</i> | 162 | 233  | 394  |
| LbrM33_V2.3140 | <i>L. braziliensis</i> | 58  | 1    | 58   |
| LbrM33_V2.3150 | <i>L. braziliensis</i> | 81  | 1    | 81   |
| LbrM33_V2.3170 | <i>L. braziliensis</i> | 50  | 173  | 222  |
| LbrM33_V2.3170 | <i>L. braziliensis</i> | 71  | 258  | 328  |
| LbrM33_V2.3170 | <i>L. braziliensis</i> | 59  | 350  | 408  |
| LbrM33_V2.3180 | <i>L. braziliensis</i> | 144 | 109  | 252  |
| LbrM33_V2.3190 | <i>L. braziliensis</i> | 71  | 81   | 151  |
| LbrM33_V2.3190 | <i>L. braziliensis</i> | 101 | 185  | 285  |

|                |                        |     |      |      |
|----------------|------------------------|-----|------|------|
| LbrM33_V2.3190 | <i>L. braziliensis</i> | 76  | 319  | 394  |
| LbrM33_V2.3190 | <i>L. braziliensis</i> | 108 | 426  | 533  |
| LbrM33_V2.3190 | <i>L. braziliensis</i> | 126 | 543  | 668  |
| LbrM33_V2.3190 | <i>L. braziliensis</i> | 454 | 723  | 1176 |
| LbrM33_V2.3190 | <i>L. braziliensis</i> | 143 | 1527 | 1669 |
| LbrM33_V2.3190 | <i>L. braziliensis</i> | 289 | 1685 | 1973 |
| LbrM33_V2.3190 | <i>L. braziliensis</i> | 87  | 2285 | 2371 |
| LbrM33_V2.3200 | <i>L. braziliensis</i> | 106 | 94   | 199  |
| LbrM33_V2.3200 | <i>L. braziliensis</i> | 50  | 306  | 355  |
| LbrM33_V2.3200 | <i>L. braziliensis</i> | 53  | 467  | 519  |
| LbrM33_V2.3200 | <i>L. braziliensis</i> | 45  | 542  | 586  |
| LbrM33_V2.3200 | <i>L. braziliensis</i> | 140 | 846  | 985  |
| LbrM33_V2.3200 | <i>L. braziliensis</i> | 131 | 1264 | 1394 |
| LbrM33_V2.3200 | <i>L. braziliensis</i> | 52  | 1657 | 1708 |
| LbrM33_V2.3210 | <i>L. braziliensis</i> | 314 | 1    | 314  |
| LbrM33_V2.3220 | <i>L. braziliensis</i> | 308 | 14   | 321  |
| LbrM33_V2.3220 | <i>L. braziliensis</i> | 154 | 549  | 702  |
| LbrM33_V2.3220 | <i>L. braziliensis</i> | 82  | 988  | 1069 |
| LbrM33_V2.3230 | <i>L. braziliensis</i> | 289 | 1    | 289  |
| LbrM33_V2.3230 | <i>L. braziliensis</i> | 87  | 544  | 630  |
| LbrM33_V2.3240 | <i>L. braziliensis</i> | 329 | 1    | 329  |
| LbrM33_V2.3240 | <i>L. braziliensis</i> | 74  | 578  | 651  |
| LbrM33_V2.3250 | <i>L. braziliensis</i> | 78  | 30   | 107  |
| LbrM33_V2.3250 | <i>L. braziliensis</i> | 44  | 125  | 168  |
| LbrM33_V2.3250 | <i>L. braziliensis</i> | 70  | 204  | 273  |
| LbrM33_V2.3250 | <i>L. braziliensis</i> | 59  | 300  | 358  |
| LbrM33_V2.3250 | <i>L. braziliensis</i> | 167 | 384  | 550  |
| LbrM33_V2.3250 | <i>L. braziliensis</i> | 197 | 568  | 764  |
| LbrM33_V2.3250 | <i>L. braziliensis</i> | 88  | 822  | 909  |
| LbrM33_V2.3250 | <i>L. braziliensis</i> | 67  | 994  | 1060 |
| LbrM33_V2.3250 | <i>L. braziliensis</i> | 40  | 1097 | 1136 |
| LbrM33_V2.3260 | <i>L. braziliensis</i> | 131 | 1    | 131  |
| LbrM33_V2.3260 | <i>L. braziliensis</i> | 244 | 150  | 393  |
| LbrM33_V2.3260 | <i>L. braziliensis</i> | 55  | 714  | 768  |
| LbrM33_V2.3260 | <i>L. braziliensis</i> | 40  | 785  | 824  |
| LbrM33_V2.3260 | <i>L. braziliensis</i> | 181 | 1058 | 1238 |
| LbrM33_V2.3270 | <i>L. braziliensis</i> | 140 | 1    | 140  |
| LbrM33_V2.3270 | <i>L. braziliensis</i> | 109 | 222  | 330  |
| LbrM33_V2.3280 | <i>L. braziliensis</i> | 482 | 1    | 482  |
| LbrM33_V2.3280 | <i>L. braziliensis</i> | 50  | 754  | 803  |
| LbrM33_V2.3280 | <i>L. braziliensis</i> | 62  | 903  | 964  |
| LbrM33_V2.3290 | <i>L. braziliensis</i> | 90  | 1    | 90   |
| LbrM33_V2.3290 | <i>L. braziliensis</i> | 625 | 128  | 752  |
| LbrM33_V2.3300 | <i>L. braziliensis</i> | 127 | 49   | 175  |
| LbrM33_V2.3300 | <i>L. braziliensis</i> | 54  | 208  | 261  |
| LbrM33_V2.3300 | <i>L. braziliensis</i> | 198 | 276  | 473  |
| LbrM33_V2.3300 | <i>L. braziliensis</i> | 113 | 499  | 611  |

|                |                        |     |      |      |
|----------------|------------------------|-----|------|------|
| LbrM33_V2.3300 | <i>L. braziliensis</i> | 202 | 627  | 828  |
| LbrM33_V2.3300 | <i>L. braziliensis</i> | 84  | 834  | 917  |
| LbrM33_V2.3310 | <i>L. braziliensis</i> | 75  | 1    | 75   |
| LbrM33_V2.3310 | <i>L. braziliensis</i> | 253 | 125  | 377  |
| LbrM33_V2.3310 | <i>L. braziliensis</i> | 72  | 427  | 498  |
| LbrM33_V2.3310 | <i>L. braziliensis</i> | 175 | 549  | 723  |
| LbrM33_V2.3310 | <i>L. braziliensis</i> | 234 | 754  | 987  |
| LbrM33_V2.3320 | <i>L. braziliensis</i> | 47  | 660  | 706  |
| LbrM33_V2.3330 | <i>L. braziliensis</i> | 44  | 421  | 464  |
| LbrM33_V2.3330 | <i>L. braziliensis</i> | 48  | 633  | 680  |
| LbrM33_V2.3330 | <i>L. braziliensis</i> | 48  | 633  | 680  |
| LbrM33_V2.3350 | <i>L. braziliensis</i> | 72  | 114  | 185  |
| LbrM33_V2.3350 | <i>L. braziliensis</i> | 72  | 272  | 343  |
| LbrM33_V2.3350 | <i>L. braziliensis</i> | 68  | 430  | 497  |
| LbrM33_V2.3350 | <i>L. braziliensis</i> | 67  | 589  | 655  |
| LbrM33_V2.3350 | <i>L. braziliensis</i> | 64  | 747  | 810  |
| LbrM33_V2.3350 | <i>L. braziliensis</i> | 63  | 904  | 966  |
| LbrM33_V2.3350 | <i>L. braziliensis</i> | 45  | 1078 | 1122 |
| LbrM33_V2.3350 | <i>L. braziliensis</i> | 63  | 1216 | 1278 |
| LbrM33_V2.3350 | <i>L. braziliensis</i> | 63  | 1372 | 1434 |
| LbrM33_V2.3350 | <i>L. braziliensis</i> | 63  | 1528 | 1590 |
| LbrM33_V2.3350 | <i>L. braziliensis</i> | 69  | 1681 | 1749 |
| LbrM33_V2.3350 | <i>L. braziliensis</i> | 63  | 1842 | 1904 |
| LbrM33_V2.3350 | <i>L. braziliensis</i> | 73  | 1995 | 2067 |
| LbrM33_V2.3350 | <i>L. braziliensis</i> | 69  | 2153 | 2221 |
| LbrM33_V2.3350 | <i>L. braziliensis</i> | 64  | 2313 | 2376 |
| LbrM33_V2.3350 | <i>L. braziliensis</i> | 67  | 2469 | 2535 |
| LbrM33_V2.3350 | <i>L. braziliensis</i> | 72  | 2626 | 2697 |
| LbrM33_V2.3350 | <i>L. braziliensis</i> | 72  | 2783 | 2854 |
| LbrM33_V2.3350 | <i>L. braziliensis</i> | 72  | 2941 | 3012 |
| LbrM33_V2.3350 | <i>L. braziliensis</i> | 68  | 3100 | 3167 |
| LbrM33_V2.3350 | <i>L. braziliensis</i> | 68  | 3258 | 3325 |
| LbrM33_V2.3350 | <i>L. braziliensis</i> | 64  | 3417 | 3480 |
| LbrM33_V2.3350 | <i>L. braziliensis</i> | 73  | 3571 | 3643 |
| LbrM33_V2.3350 | <i>L. braziliensis</i> | 72  | 3729 | 3800 |
| LbrM33_V2.3350 | <i>L. braziliensis</i> | 64  | 3889 | 3952 |
| LbrM33_V2.3350 | <i>L. braziliensis</i> | 64  | 4045 | 4108 |
| LbrM33_V2.3350 | <i>L. braziliensis</i> | 69  | 4199 | 4267 |
| LbrM33_V2.3360 | <i>L. braziliensis</i> | 69  | 113  | 181  |
| LbrM33_V2.3360 | <i>L. braziliensis</i> | 72  | 272  | 343  |
| LbrM33_V2.3360 | <i>L. braziliensis</i> | 64  | 431  | 494  |
| LbrM33_V2.3360 | <i>L. braziliensis</i> | 45  | 606  | 650  |
| LbrM33_V2.3360 | <i>L. braziliensis</i> | 73  | 741  | 813  |
| LbrM33_V2.3360 | <i>L. braziliensis</i> | 73  | 899  | 971  |
| LbrM33_V2.3360 | <i>L. braziliensis</i> | 73  | 1057 | 1129 |
| LbrM33_V2.3360 | <i>L. braziliensis</i> | 73  | 1215 | 1287 |
| LbrM33_V2.3360 | <i>L. braziliensis</i> | 73  | 1373 | 1445 |

|                |                        |     |      |      |
|----------------|------------------------|-----|------|------|
| LbrM33_V2.3360 | <i>L. braziliensis</i> | 58  | 1534 | 1591 |
| LbrM33_V2.3360 | <i>L. braziliensis</i> | 72  | 1746 | 1817 |
| LbrM33_V2.3360 | <i>L. braziliensis</i> | 71  | 2086 | 2156 |
| LbrM33_V2.3360 | <i>L. braziliensis</i> | 169 | 2159 | 2327 |
| LbrM33_V2.3370 | <i>L. braziliensis</i> | 48  | 85   | 132  |
| LbrM33_V2.3370 | <i>L. braziliensis</i> | 60  | 261  | 320  |
| LbrM33_V2.3370 | <i>L. braziliensis</i> | 64  | 436  | 499  |
| LbrM33_V2.3370 | <i>L. braziliensis</i> | 56  | 613  | 668  |
| LbrM33_V2.3370 | <i>L. braziliensis</i> | 322 | 708  | 1029 |
| LbrM33_V2.3370 | <i>L. braziliensis</i> | 72  | 1088 | 1159 |
| LbrM33_V2.3370 | <i>L. braziliensis</i> | 45  | 1184 | 1228 |
| LbrM33_V2.3370 | <i>L. braziliensis</i> | 50  | 1240 | 1289 |
| LbrM33_V2.3370 | <i>L. braziliensis</i> | 42  | 1378 | 1419 |
| LbrM33_V2.3370 | <i>L. braziliensis</i> | 233 | 1661 | 1893 |
| LbrM33_V2.3370 | <i>L. braziliensis</i> | 162 | 1905 | 2066 |
| LbrM33_V2.3370 | <i>L. braziliensis</i> | 168 | 2087 | 2254 |
| LbrM33_V2.3380 | <i>L. braziliensis</i> | 131 | 64   | 194  |
| LbrM33_V2.3380 | <i>L. braziliensis</i> | 44  | 1198 | 1241 |
| LbrM33_V2.3380 | <i>L. braziliensis</i> | 44  | 1198 | 1241 |
| LbrM33_V2.3390 | <i>L. braziliensis</i> | 113 | 234  | 346  |
| LbrM33_V2.3420 | <i>L. braziliensis</i> | 54  | 1    | 54   |
| LbrM33_V2.3430 | <i>L. braziliensis</i> | 71  | 1    | 71   |
| LbrM33_V2.3430 | <i>L. braziliensis</i> | 63  | 273  | 335  |
| LbrM33_V2.3430 | <i>L. braziliensis</i> | 63  | 273  | 335  |
| LbrM33_V2.3440 | <i>L. braziliensis</i> | 57  | 121  | 177  |
| LbrM33_V2.3440 | <i>L. braziliensis</i> | 117 | 238  | 354  |
| LbrM33_V2.3440 | <i>L. braziliensis</i> | 119 | 374  | 492  |
| LbrM33_V2.3450 | <i>L. braziliensis</i> | 46  | 346  | 391  |
| LbrM33_V2.3450 | <i>L. braziliensis</i> | 189 | 417  | 605  |
| LbrM33_V2.3480 | <i>L. braziliensis</i> | 111 | 794  | 904  |
| LbrM33_V2.3490 | <i>L. braziliensis</i> | 69  | 137  | 205  |
| LbrM33_V2.3490 | <i>L. braziliensis</i> | 63  | 237  | 299  |
| LbrM33_V2.3490 | <i>L. braziliensis</i> | 109 | 310  | 418  |
| LbrM33_V2.3510 | <i>L. braziliensis</i> | 50  | 29   | 78   |
| LbrM33_V2.3520 | <i>L. braziliensis</i> | 98  | 40   | 137  |
| LbrM33_V2.3530 | <i>L. braziliensis</i> | 127 | 1    | 127  |
| LbrM33_V2.3530 | <i>L. braziliensis</i> | 195 | 135  | 329  |
| LbrM33_V2.3540 | <i>L. braziliensis</i> | 58  | 417  | 474  |
| LbrM34_V2.0030 | <i>L. braziliensis</i> | 42  | 1    | 42   |
| LbrM34_V2.0050 | <i>L. braziliensis</i> | 42  | 1    | 42   |
| LbrM34_V2.0100 | <i>L. braziliensis</i> | 472 | 177  | 648  |
| LbrM34_V2.0110 | <i>L. braziliensis</i> | 41  | 194  | 234  |
| LbrM34_V2.0120 | <i>L. braziliensis</i> | 43  | 1    | 43   |
| LbrM34_V2.0130 | <i>L. braziliensis</i> | 127 | 1    | 127  |
| LbrM34_V2.0210 | <i>L. braziliensis</i> | 56  | 76   | 131  |
| LbrM34_V2.0210 | <i>L. braziliensis</i> | 68  | 206  | 273  |
| LbrM34_V2.0210 | <i>L. braziliensis</i> | 68  | 206  | 273  |

|                |                        |     |      |      |
|----------------|------------------------|-----|------|------|
| LbrM34_V2.0220 | <i>L. braziliensis</i> | 139 | 1    | 139  |
| LbrM34_V2.0220 | <i>L. braziliensis</i> | 251 | 180  | 430  |
| LbrM34_V2.0220 | <i>L. braziliensis</i> | 58  | 462  | 519  |
| LbrM34_V2.0220 | <i>L. braziliensis</i> | 53  | 537  | 589  |
| LbrM34_V2.0220 | <i>L. braziliensis</i> | 145 | 621  | 765  |
| LbrM34_V2.0220 | <i>L. braziliensis</i> | 82  | 781  | 862  |
| LbrM34_V2.0240 | <i>L. braziliensis</i> | 362 | 69   | 430  |
| LbrM34_V2.0240 | <i>L. braziliensis</i> | 51  | 455  | 505  |
| LbrM34_V2.0240 | <i>L. braziliensis</i> | 61  | 598  | 658  |
| LbrM34_V2.0240 | <i>L. braziliensis</i> | 146 | 718  | 863  |
| LbrM34_V2.0240 | <i>L. braziliensis</i> | 97  | 909  | 1005 |
| LbrM34_V2.0240 | <i>L. braziliensis</i> | 95  | 1016 | 1110 |
| LbrM34_V2.0240 | <i>L. braziliensis</i> | 57  | 1235 | 1291 |
| LbrM34_V2.0240 | <i>L. braziliensis</i> | 171 | 1328 | 1498 |
| LbrM34_V2.0240 | <i>L. braziliensis</i> | 220 | 1510 | 1729 |
| LbrM34_V2.0240 | <i>L. braziliensis</i> | 332 | 1761 | 2092 |
| LbrM34_V2.0240 | <i>L. braziliensis</i> | 184 | 2262 | 2445 |
| LbrM34_V2.0260 | <i>L. braziliensis</i> | 106 | 158  | 263  |
| LbrM34_V2.0270 | <i>L. braziliensis</i> | 45  | 142  | 186  |
| LbrM34_V2.0270 | <i>L. braziliensis</i> | 54  | 294  | 347  |
| LbrM34_V2.0270 | <i>L. braziliensis</i> | 54  | 294  | 347  |
| LbrM34_V2.0290 | <i>L. braziliensis</i> | 69  | 108  | 176  |
| LbrM34_V2.0290 | <i>L. braziliensis</i> | 116 | 326  | 441  |
| LbrM34_V2.0290 | <i>L. braziliensis</i> | 44  | 554  | 597  |
| LbrM34_V2.0290 | <i>L. braziliensis</i> | 48  | 671  | 718  |
| LbrM34_V2.0300 | <i>L. braziliensis</i> | 139 | 171  | 309  |
| LbrM34_V2.0300 | <i>L. braziliensis</i> | 86  | 406  | 491  |
| LbrM34_V2.0330 | <i>L. braziliensis</i> | 711 | 36   | 746  |
| LbrM34_V2.0330 | <i>L. braziliensis</i> | 51  | 774  | 824  |
| LbrM34_V2.0330 | <i>L. braziliensis</i> | 48  | 1420 | 1467 |
| LbrM34_V2.0340 | <i>L. braziliensis</i> | 100 | 15   | 114  |
| LbrM34_V2.0340 | <i>L. braziliensis</i> | 76  | 149  | 224  |
| LbrM34_V2.0340 | <i>L. braziliensis</i> | 43  | 258  | 300  |
| LbrM34_V2.0350 | <i>L. braziliensis</i> | 67  | 302  | 368  |
| LbrM34_V2.0360 | <i>L. braziliensis</i> | 62  | 1    | 62   |
| LbrM34_V2.0380 | <i>L. braziliensis</i> | 54  | 148  | 201  |
| LbrM34_V2.0380 | <i>L. braziliensis</i> | 41  | 329  | 369  |
| LbrM34_V2.0380 | <i>L. braziliensis</i> | 41  | 329  | 369  |
| LbrM34_V2.0390 | <i>L. braziliensis</i> | 74  | 71   | 144  |
| LbrM34_V2.0390 | <i>L. braziliensis</i> | 54  | 146  | 199  |
| LbrM34_V2.0390 | <i>L. braziliensis</i> | 86  | 439  | 524  |
| LbrM34_V2.0400 | <i>L. braziliensis</i> | 49  | 248  | 296  |
| LbrM34_V2.0410 | <i>L. braziliensis</i> | 154 | 10   | 163  |
| LbrM34_V2.0410 | <i>L. braziliensis</i> | 116 | 229  | 344  |
| LbrM34_V2.0410 | <i>L. braziliensis</i> | 59  | 555  | 613  |
| LbrM34_V2.0420 | <i>L. braziliensis</i> | 53  | 29   | 81   |
| LbrM34_V2.0420 | <i>L. braziliensis</i> | 66  | 158  | 223  |



|                |                        |      |      |      |
|----------------|------------------------|------|------|------|
| LbrM34_V2.0420 | <i>L. braziliensis</i> | 41   | 328  | 368  |
| LbrM34_V2.0420 | <i>L. braziliensis</i> | 47   | 464  | 510  |
| LbrM34_V2.0450 | <i>L. braziliensis</i> | 129  | 12   | 140  |
| LbrM34_V2.0450 | <i>L. braziliensis</i> | 56   | 177  | 232  |
| LbrM34_V2.0450 | <i>L. braziliensis</i> | 200  | 253  | 452  |
| LbrM34_V2.0460 | <i>L. braziliensis</i> | 58   | 253  | 310  |
| LbrM34_V2.0460 | <i>L. braziliensis</i> | 45   | 348  | 392  |
| LbrM34_V2.0480 | <i>L. braziliensis</i> | 211  | 695  | 905  |
| LbrM34_V2.0490 | <i>L. braziliensis</i> | 68   | 28   | 95   |
| LbrM34_V2.0490 | <i>L. braziliensis</i> | 62   | 140  | 201  |
| LbrM34_V2.0490 | <i>L. braziliensis</i> | 41   | 219  | 259  |
| LbrM34_V2.0510 | <i>L. braziliensis</i> | 397  | 277  | 673  |
| LbrM34_V2.0510 | <i>L. braziliensis</i> | 136  | 784  | 919  |
| LbrM34_V2.0510 | <i>L. braziliensis</i> | 96   | 1084 | 1179 |
| LbrM34_V2.0510 | <i>L. braziliensis</i> | 372  | 1267 | 1638 |
| LbrM34_V2.0520 | <i>L. braziliensis</i> | 47   | 341  | 387  |
| LbrM34_V2.0520 | <i>L. braziliensis</i> | 219  | 652  | 870  |
| LbrM34_V2.0530 | <i>L. braziliensis</i> | 58   | 294  | 351  |
| LbrM34_V2.0530 | <i>L. braziliensis</i> | 3709 | 616  | 4324 |
| LbrM34_V2.0540 | <i>L. braziliensis</i> | 2500 | 176  | 2675 |
| LbrM34_V2.0540 | <i>L. braziliensis</i> | 41   | 3805 | 3845 |
| LbrM34_V2.0540 | <i>L. braziliensis</i> | 620  | 4558 | 5177 |
| LbrM34_V2.0550 | <i>L. braziliensis</i> | 55   | 299  | 353  |
| LbrM34_V2.0550 | <i>L. braziliensis</i> | 124  | 617  | 740  |
| LbrM34_V2.0560 | <i>L. braziliensis</i> | 82   | 1    | 82   |
| LbrM34_V2.0560 | <i>L. braziliensis</i> | 284  | 90   | 373  |
| LbrM34_V2.0560 | <i>L. braziliensis</i> | 272  | 404  | 675  |
| LbrM34_V2.0560 | <i>L. braziliensis</i> | 46   | 701  | 746  |
| LbrM34_V2.0570 | <i>L. braziliensis</i> | 49   | 156  | 204  |
| LbrM34_V2.0570 | <i>L. braziliensis</i> | 43   | 425  | 467  |
| LbrM34_V2.0570 | <i>L. braziliensis</i> | 64   | 516  | 579  |
| LbrM34_V2.0570 | <i>L. braziliensis</i> | 64   | 924  | 987  |
| LbrM34_V2.0570 | <i>L. braziliensis</i> | 301  | 1341 | 1641 |
| LbrM34_V2.0570 | <i>L. braziliensis</i> | 94   | 1702 | 1795 |
| LbrM34_V2.0570 | <i>L. braziliensis</i> | 88   | 1866 | 1953 |
| LbrM34_V2.0570 | <i>L. braziliensis</i> | 119  | 1999 | 2117 |
| LbrM34_V2.0580 | <i>L. braziliensis</i> | 223  | 1    | 223  |
| LbrM34_V2.0590 | <i>L. braziliensis</i> | 73   | 266  | 338  |
| LbrM34_V2.0590 | <i>L. braziliensis</i> | 50   | 357  | 406  |
| LbrM34_V2.0590 | <i>L. braziliensis</i> | 48   | 605  | 652  |
| LbrM34_V2.0610 | <i>L. braziliensis</i> | 67   | 1    | 67   |
| LbrM34_V2.0610 | <i>L. braziliensis</i> | 106  | 111  | 216  |
| LbrM34_V2.0610 | <i>L. braziliensis</i> | 87   | 412  | 498  |
| LbrM34_V2.0610 | <i>L. braziliensis</i> | 54   | 865  | 918  |
| LbrM34_V2.0610 | <i>L. braziliensis</i> | 55   | 974  | 1028 |
| LbrM34_V2.0610 | <i>L. braziliensis</i> | 108  | 1062 | 1169 |
| LbrM34_V2.0610 | <i>L. braziliensis</i> | 107  | 1692 | 1798 |

|                |                        |     |      |      |
|----------------|------------------------|-----|------|------|
| LbrM34_V2.0610 | <i>L. braziliensis</i> | 46  | 1912 | 1957 |
| LbrM34_V2.0610 | <i>L. braziliensis</i> | 60  | 2041 | 2100 |
| LbrM34_V2.0610 | <i>L. braziliensis</i> | 46  | 2293 | 2338 |
| LbrM34_V2.0610 | <i>L. braziliensis</i> | 84  | 2409 | 2492 |
| LbrM34_V2.0630 | <i>L. braziliensis</i> | 75  | 1    | 75   |
| LbrM34_V2.0630 | <i>L. braziliensis</i> | 159 | 148  | 306  |
| LbrM34_V2.0630 | <i>L. braziliensis</i> | 47  | 406  | 452  |
| LbrM34_V2.0640 | <i>L. braziliensis</i> | 45  | 431  | 475  |
| LbrM34_V2.0650 | <i>L. braziliensis</i> | 44  | 1    | 44   |
| LbrM34_V2.0650 | <i>L. braziliensis</i> | 44  | 49   | 92   |
| LbrM34_V2.0650 | <i>L. braziliensis</i> | 67  | 177  | 243  |
| LbrM34_V2.0650 | <i>L. braziliensis</i> | 273 | 270  | 542  |
| LbrM34_V2.0650 | <i>L. braziliensis</i> | 75  | 626  | 700  |
| LbrM34_V2.0650 | <i>L. braziliensis</i> | 58  | 856  | 913  |
| LbrM34_V2.0650 | <i>L. braziliensis</i> | 45  | 945  | 989  |
| LbrM34_V2.0650 | <i>L. braziliensis</i> | 56  | 1182 | 1237 |
| LbrM34_V2.0660 | <i>L. braziliensis</i> | 53  | 269  | 321  |
| LbrM34_V2.0660 | <i>L. braziliensis</i> | 46  | 495  | 540  |
| LbrM34_V2.0660 | <i>L. braziliensis</i> | 65  | 720  | 784  |
| LbrM34_V2.0660 | <i>L. braziliensis</i> | 46  | 852  | 897  |
| LbrM34_V2.0660 | <i>L. braziliensis</i> | 46  | 945  | 990  |
| LbrM34_V2.0660 | <i>L. braziliensis</i> | 45  | 1318 | 1362 |
| LbrM34_V2.0660 | <i>L. braziliensis</i> | 103 | 2130 | 2232 |
| LbrM34_V2.0660 | <i>L. braziliensis</i> | 53  | 2647 | 2699 |
| LbrM34_V2.0660 | <i>L. braziliensis</i> | 94  | 2854 | 2947 |
| LbrM34_V2.0660 | <i>L. braziliensis</i> | 40  | 3100 | 3139 |
| LbrM34_V2.0660 | <i>L. braziliensis</i> | 110 | 3241 | 3350 |
| LbrM34_V2.0660 | <i>L. braziliensis</i> | 43  | 4060 | 4102 |
| LbrM34_V2.0660 | <i>L. braziliensis</i> | 68  | 4114 | 4181 |
| LbrM34_V2.0670 | <i>L. braziliensis</i> | 203 | 1    | 203  |
| LbrM34_V2.0670 | <i>L. braziliensis</i> | 223 | 237  | 459  |
| LbrM34_V2.0670 | <i>L. braziliensis</i> | 143 | 519  | 661  |
| LbrM34_V2.0670 | <i>L. braziliensis</i> | 182 | 692  | 873  |
| LbrM34_V2.0670 | <i>L. braziliensis</i> | 73  | 969  | 1041 |
| LbrM34_V2.0680 | <i>L. braziliensis</i> | 41  | 582  | 622  |
| LbrM34_V2.0690 | <i>L. braziliensis</i> | 45  | 200  | 244  |
| LbrM34_V2.0700 | <i>L. braziliensis</i> | 40  | 117  | 156  |
| LbrM34_V2.0710 | <i>L. braziliensis</i> | 46  | 396  | 441  |
| LbrM34_V2.0720 | <i>L. braziliensis</i> | 252 | 1    | 252  |
| LbrM34_V2.0720 | <i>L. braziliensis</i> | 42  | 260  | 301  |
| LbrM34_V2.0720 | <i>L. braziliensis</i> | 50  | 477  | 526  |
| LbrM34_V2.0720 | <i>L. braziliensis</i> | 74  | 647  | 720  |
| LbrM34_V2.0730 | <i>L. braziliensis</i> | 66  | 368  | 433  |
| LbrM34_V2.0730 | <i>L. braziliensis</i> | 176 | 470  | 645  |
| LbrM34_V2.0730 | <i>L. braziliensis</i> | 193 | 699  | 891  |
| LbrM34_V2.0750 | <i>L. braziliensis</i> | 72  | 229  | 300  |
| LbrM34_V2.0760 | <i>L. braziliensis</i> | 95  | 151  | 245  |

|                |                        |     |      |      |
|----------------|------------------------|-----|------|------|
| LbrM34_V2.0780 | <i>L. braziliensis</i> | 58  | 37   | 94   |
| LbrM34_V2.0780 | <i>L. braziliensis</i> | 67  | 303  | 369  |
| LbrM34_V2.0780 | <i>L. braziliensis</i> | 67  | 303  | 369  |
| LbrM34_V2.0790 | <i>L. braziliensis</i> | 165 | 76   | 240  |
| LbrM34_V2.0790 | <i>L. braziliensis</i> | 75  | 270  | 344  |
| LbrM34_V2.0790 | <i>L. braziliensis</i> | 49  | 424  | 472  |
| LbrM34_V2.0790 | <i>L. braziliensis</i> | 54  | 515  | 568  |
| LbrM34_V2.0790 | <i>L. braziliensis</i> | 128 | 610  | 737  |
| LbrM34_V2.0790 | <i>L. braziliensis</i> | 210 | 764  | 973  |
| LbrM34_V2.0800 | <i>L. braziliensis</i> | 126 | 1    | 126  |
| LbrM34_V2.0800 | <i>L. braziliensis</i> | 178 | 138  | 315  |
| LbrM34_V2.0800 | <i>L. braziliensis</i> | 456 | 318  | 773  |
| LbrM34_V2.0800 | <i>L. braziliensis</i> | 115 | 807  | 921  |
| LbrM34_V2.0800 | <i>L. braziliensis</i> | 248 | 924  | 1171 |
| LbrM34_V2.0800 | <i>L. braziliensis</i> | 70  | 1189 | 1258 |
| LbrM34_V2.0800 | <i>L. braziliensis</i> | 69  | 1284 | 1352 |
| LbrM34_V2.0820 | <i>L. braziliensis</i> | 46  | 261  | 306  |
| LbrM34_V2.0830 | <i>L. braziliensis</i> | 111 | 50   | 160  |
| LbrM34_V2.0850 | <i>L. braziliensis</i> | 97  | 65   | 161  |
| LbrM34_V2.0870 | <i>L. braziliensis</i> | 69  | 1    | 69   |
| LbrM34_V2.0870 | <i>L. braziliensis</i> | 42  | 305  | 346  |
| LbrM34_V2.0870 | <i>L. braziliensis</i> | 49  | 419  | 467  |
| LbrM34_V2.0880 | <i>L. braziliensis</i> | 109 | 1    | 109  |
| LbrM34_V2.0890 | <i>L. braziliensis</i> | 236 | 1    | 236  |
| LbrM34_V2.0900 | <i>L. braziliensis</i> | 321 | 1    | 321  |
| LbrM34_V2.0900 | <i>L. braziliensis</i> | 426 | 452  | 877  |
| LbrM34_V2.0900 | <i>L. braziliensis</i> | 94  | 884  | 977  |
| LbrM34_V2.0900 | <i>L. braziliensis</i> | 369 | 982  | 1350 |
| LbrM34_V2.0900 | <i>L. braziliensis</i> | 67  | 1359 | 1425 |
| LbrM34_V2.0900 | <i>L. braziliensis</i> | 168 | 1435 | 1602 |
| LbrM34_V2.0900 | <i>L. braziliensis</i> | 45  | 1659 | 1703 |
| LbrM34_V2.0900 | <i>L. braziliensis</i> | 51  | 1725 | 1775 |
| LbrM34_V2.0900 | <i>L. braziliensis</i> | 50  | 1868 | 1917 |
| LbrM34_V2.0910 | <i>L. braziliensis</i> | 198 | 109  | 306  |
| LbrM34_V2.0920 | <i>L. braziliensis</i> | 55  | 1    | 55   |
| LbrM34_V2.0920 | <i>L. braziliensis</i> | 47  | 83   | 129  |
| LbrM34_V2.0920 | <i>L. braziliensis</i> | 67  | 144  | 210  |
| LbrM34_V2.0930 | <i>L. braziliensis</i> | 100 | 23   | 122  |
| LbrM34_V2.0930 | <i>L. braziliensis</i> | 51  | 143  | 193  |
| LbrM34_V2.0930 | <i>L. braziliensis</i> | 51  | 143  | 193  |
| LbrM34_V2.0940 | <i>L. braziliensis</i> | 41  | 1    | 41   |
| LbrM34_V2.0940 | <i>L. braziliensis</i> | 137 | 75   | 211  |
| LbrM34_V2.0950 | <i>L. braziliensis</i> | 111 | 104  | 214  |
| LbrM34_V2.0950 | <i>L. braziliensis</i> | 79  | 235  | 313  |
| LbrM34_V2.0950 | <i>L. braziliensis</i> | 54  | 438  | 491  |
| LbrM34_V2.0950 | <i>L. braziliensis</i> | 45  | 503  | 547  |
| LbrM34_V2.0950 | <i>L. braziliensis</i> | 58  | 588  | 645  |

|                |                        |     |      |      |
|----------------|------------------------|-----|------|------|
| LbrM34_V2.0950 | <i>L. braziliensis</i> | 42  | 708  | 749  |
| LbrM34_V2.0980 | <i>L. braziliensis</i> | 88  | 37   | 124  |
| LbrM34_V2.0980 | <i>L. braziliensis</i> | 65  | 261  | 325  |
| LbrM34_V2.0980 | <i>L. braziliensis</i> | 92  | 452  | 543  |
| LbrM34_V2.0980 | <i>L. braziliensis</i> | 272 | 579  | 850  |
| LbrM34_V2.1000 | <i>L. braziliensis</i> | 52  | 303  | 354  |
| LbrM34_V2.1010 | <i>L. braziliensis</i> | 133 | 1    | 133  |
| LbrM34_V2.1010 | <i>L. braziliensis</i> | 136 | 203  | 338  |
| LbrM34_V2.1020 | <i>L. braziliensis</i> | 49  | 1    | 49   |
| LbrM34_V2.1030 | <i>L. braziliensis</i> | 103 | 70   | 172  |
| LbrM34_V2.1030 | <i>L. braziliensis</i> | 92  | 213  | 304  |
| LbrM34_V2.1040 | <i>L. braziliensis</i> | 64  | 78   | 141  |
| LbrM34_V2.1080 | <i>L. braziliensis</i> | 111 | 70   | 180  |
| LbrM34_V2.1080 | <i>L. braziliensis</i> | 100 | 502  | 601  |
| LbrM34_V2.1110 | <i>L. braziliensis</i> | 85  | 1    | 85   |
| LbrM34_V2.1120 | <i>L. braziliensis</i> | 44  | 436  | 479  |
| LbrM34_V2.1160 | <i>L. braziliensis</i> | 137 | 1    | 137  |
| LbrM34_V2.1160 | <i>L. braziliensis</i> | 195 | 196  | 390  |
| LbrM34_V2.1160 | <i>L. braziliensis</i> | 123 | 423  | 545  |
| LbrM34_V2.1160 | <i>L. braziliensis</i> | 93  | 603  | 695  |
| LbrM34_V2.1160 | <i>L. braziliensis</i> | 48  | 701  | 748  |
| LbrM34_V2.1160 | <i>L. braziliensis</i> | 61  | 786  | 846  |
| LbrM34_V2.1190 | <i>L. braziliensis</i> | 56  | 42   | 97   |
| LbrM34_V2.1190 | <i>L. braziliensis</i> | 95  | 201  | 295  |
| LbrM34_V2.1210 | <i>L. braziliensis</i> | 100 | 53   | 152  |
| LbrM34_V2.1210 | <i>L. braziliensis</i> | 58  | 191  | 248  |
| LbrM34_V2.1210 | <i>L. braziliensis</i> | 58  | 191  | 248  |
| LbrM34_V2.1230 | <i>L. braziliensis</i> | 43  | 1    | 43   |
| LbrM34_V2.1240 | <i>L. braziliensis</i> | 134 | 72   | 205  |
| LbrM34_V2.1240 | <i>L. braziliensis</i> | 116 | 226  | 341  |
| LbrM34_V2.1240 | <i>L. braziliensis</i> | 127 | 473  | 599  |
| LbrM34_V2.1240 | <i>L. braziliensis</i> | 124 | 862  | 985  |
| LbrM34_V2.1240 | <i>L. braziliensis</i> | 212 | 993  | 1204 |
| LbrM34_V2.1240 | <i>L. braziliensis</i> | 43  | 1237 | 1279 |
| LbrM34_V2.1240 | <i>L. braziliensis</i> | 172 | 1296 | 1467 |
| LbrM34_V2.1240 | <i>L. braziliensis</i> | 53  | 1547 | 1599 |
| LbrM34_V2.1240 | <i>L. braziliensis</i> | 75  | 1627 | 1701 |
| LbrM34_V2.1260 | <i>L. braziliensis</i> | 61  | 160  | 220  |
| LbrM34_V2.1270 | <i>L. braziliensis</i> | 200 | 40   | 239  |
| LbrM34_V2.1280 | <i>L. braziliensis</i> | 139 | 72   | 210  |
| LbrM34_V2.1280 | <i>L. braziliensis</i> | 83  | 248  | 330  |
| LbrM34_V2.1280 | <i>L. braziliensis</i> | 86  | 341  | 426  |
| LbrM34_V2.1310 | <i>L. braziliensis</i> | 54  | 1    | 54   |
| LbrM34_V2.1310 | <i>L. braziliensis</i> | 55  | 118  | 172  |
| LbrM34_V2.1310 | <i>L. braziliensis</i> | 74  | 311  | 384  |
| LbrM34_V2.1310 | <i>L. braziliensis</i> | 139 | 571  | 709  |
| LbrM34_V2.1320 | <i>L. braziliensis</i> | 113 | 120  | 232  |

|                |                        |     |      |      |
|----------------|------------------------|-----|------|------|
| LbrM34_V2.1330 | <i>L. braziliensis</i> | 45  | 497  | 541  |
| LbrM34_V2.1330 | <i>L. braziliensis</i> | 45  | 596  | 640  |
| LbrM34_V2.1330 | <i>L. braziliensis</i> | 45  | 596  | 640  |
| LbrM34_V2.1340 | <i>L. braziliensis</i> | 187 | 1    | 187  |
| LbrM34_V2.1340 | <i>L. braziliensis</i> | 112 | 216  | 327  |
| LbrM34_V2.1340 | <i>L. braziliensis</i> | 112 | 216  | 327  |
| LbrM34_V2.1350 | <i>L. braziliensis</i> | 63  | 198  | 260  |
| LbrM34_V2.1360 | <i>L. braziliensis</i> | 63  | 198  | 260  |
| LbrM34_V2.1370 | <i>L. braziliensis</i> | 100 | 173  | 272  |
| LbrM34_V2.1370 | <i>L. braziliensis</i> | 71  | 388  | 458  |
| LbrM34_V2.1370 | <i>L. braziliensis</i> | 161 | 467  | 627  |
| LbrM34_V2.1370 | <i>L. braziliensis</i> | 58  | 698  | 755  |
| LbrM34_V2.1370 | <i>L. braziliensis</i> | 44  | 837  | 880  |
| LbrM34_V2.1370 | <i>L. braziliensis</i> | 76  | 1058 | 1133 |
| LbrM34_V2.1370 | <i>L. braziliensis</i> | 40  | 1408 | 1447 |
| LbrM34_V2.1370 | <i>L. braziliensis</i> | 247 | 1653 | 1899 |
| LbrM34_V2.1370 | <i>L. braziliensis</i> | 128 | 1981 | 2108 |
| LbrM34_V2.1370 | <i>L. braziliensis</i> | 87  | 2124 | 2210 |
| LbrM34_V2.1370 | <i>L. braziliensis</i> | 155 | 2280 | 2434 |
| LbrM34_V2.1370 | <i>L. braziliensis</i> | 179 | 2480 | 2658 |
| LbrM34_V2.1370 | <i>L. braziliensis</i> | 281 | 2718 | 2998 |
| LbrM34_V2.1370 | <i>L. braziliensis</i> | 79  | 3102 | 3180 |
| LbrM34_V2.1390 | <i>L. braziliensis</i> | 60  | 1    | 60   |
| LbrM34_V2.1420 | <i>L. braziliensis</i> | 347 | 297  | 643  |
| LbrM34_V2.1430 | <i>L. braziliensis</i> | 64  | 236  | 299  |
| LbrM34_V2.1430 | <i>L. braziliensis</i> | 67  | 386  | 452  |
| LbrM34_V2.1430 | <i>L. braziliensis</i> | 85  | 482  | 566  |
| LbrM34_V2.1440 | <i>L. braziliensis</i> | 88  | 44   | 131  |
| LbrM34_V2.1440 | <i>L. braziliensis</i> | 88  | 167  | 254  |
| LbrM34_V2.1440 | <i>L. braziliensis</i> | 88  | 167  | 254  |
| LbrM34_V2.1460 | <i>L. braziliensis</i> | 130 | 39   | 168  |
| LbrM34_V2.1460 | <i>L. braziliensis</i> | 61  | 340  | 400  |
| LbrM34_V2.1460 | <i>L. braziliensis</i> | 61  | 340  | 400  |
| LbrM34_V2.1470 | <i>L. braziliensis</i> | 64  | 136  | 199  |
| LbrM34_V2.1470 | <i>L. braziliensis</i> | 66  | 842  | 907  |
| LbrM34_V2.1470 | <i>L. braziliensis</i> | 67  | 989  | 1055 |
| LbrM34_V2.1480 | <i>L. braziliensis</i> | 77  | 25   | 101  |
| LbrM34_V2.1490 | <i>L. braziliensis</i> | 113 | 323  | 435  |
| LbrM34_V2.1500 | <i>L. braziliensis</i> | 69  | 67   | 135  |
| LbrM34_V2.1520 | <i>L. braziliensis</i> | 50  | 475  | 524  |
| LbrM34_V2.1520 | <i>L. braziliensis</i> | 56  | 880  | 935  |
| LbrM34_V2.1520 | <i>L. braziliensis</i> | 56  | 880  | 935  |
| LbrM34_V2.1530 | <i>L. braziliensis</i> | 92  | 246  | 337  |
| LbrM34_V2.1530 | <i>L. braziliensis</i> | 64  | 429  | 492  |
| LbrM34_V2.1530 | <i>L. braziliensis</i> | 50  | 603  | 652  |
| LbrM34_V2.1530 | <i>L. braziliensis</i> | 52  | 847  | 898  |
| LbrM34_V2.1530 | <i>L. braziliensis</i> | 48  | 1039 | 1086 |

|                |                        |     |      |      |
|----------------|------------------------|-----|------|------|
| LbrM34_V2.1530 | <i>L. braziliensis</i> | 60  | 1275 | 1334 |
| LbrM34_V2.1530 | <i>L. braziliensis</i> | 58  | 1889 | 1946 |
| LbrM34_V2.1540 | <i>L. braziliensis</i> | 255 | 159  | 413  |
| LbrM34_V2.1550 | <i>L. braziliensis</i> | 59  | 84   | 142  |
| LbrM34_V2.1560 | <i>L. braziliensis</i> | 60  | 27   | 86   |
| LbrM34_V2.1560 | <i>L. braziliensis</i> | 419 | 115  | 533  |
| LbrM34_V2.1560 | <i>L. braziliensis</i> | 96  | 544  | 639  |
| LbrM34_V2.1570 | <i>L. braziliensis</i> | 69  | 72   | 140  |
| LbrM34_V2.1570 | <i>L. braziliensis</i> | 170 | 417  | 586  |
| LbrM34_V2.1580 | <i>L. braziliensis</i> | 40  | 1    | 40   |
| LbrM34_V2.1580 | <i>L. braziliensis</i> | 40  | 104  | 143  |
| LbrM34_V2.1580 | <i>L. braziliensis</i> | 40  | 104  | 143  |
| LbrM34_V2.1590 | <i>L. braziliensis</i> | 75  | 212  | 286  |
| LbrM34_V2.1600 | <i>L. braziliensis</i> | 41  | 18   | 58   |
| LbrM34_V2.1600 | <i>L. braziliensis</i> | 187 | 232  | 418  |
| LbrM34_V2.1620 | <i>L. braziliensis</i> | 68  | 52   | 119  |
| LbrM34_V2.1640 | <i>L. braziliensis</i> | 49  | 688  | 736  |
| LbrM34_V2.1680 | <i>L. braziliensis</i> | 60  | 117  | 176  |
| LbrM34_V2.1690 | <i>L. braziliensis</i> | 49  | 97   | 145  |
| LbrM34_V2.1690 | <i>L. braziliensis</i> | 54  | 157  | 210  |
| LbrM34_V2.1690 | <i>L. braziliensis</i> | 54  | 157  | 210  |
| LbrM34_V2.1710 | <i>L. braziliensis</i> | 49  | 208  | 256  |
| LbrM34_V2.1720 | <i>L. braziliensis</i> | 252 | 57   | 308  |
| LbrM34_V2.1720 | <i>L. braziliensis</i> | 42  | 367  | 408  |
| LbrM34_V2.1720 | <i>L. braziliensis</i> | 42  | 367  | 408  |
| LbrM34_V2.1730 | <i>L. braziliensis</i> | 124 | 1    | 124  |
| LbrM34_V2.1730 | <i>L. braziliensis</i> | 112 | 162  | 273  |
| LbrM34_V2.1770 | <i>L. braziliensis</i> | 98  | 1    | 98   |
| LbrM34_V2.1770 | <i>L. braziliensis</i> | 72  | 125  | 196  |
| LbrM34_V2.1780 | <i>L. braziliensis</i> | 42  | 145  | 186  |
| LbrM34_V2.1780 | <i>L. braziliensis</i> | 115 | 198  | 312  |
| LbrM34_V2.1780 | <i>L. braziliensis</i> | 42  | 407  | 448  |
| LbrM34_V2.1780 | <i>L. braziliensis</i> | 50  | 533  | 582  |
| LbrM34_V2.1780 | <i>L. braziliensis</i> | 42  | 695  | 736  |
| LbrM34_V2.1790 | <i>L. braziliensis</i> | 93  | 213  | 305  |
| LbrM34_V2.1800 | <i>L. braziliensis</i> | 93  | 213  | 305  |
| LbrM34_V2.1810 | <i>L. braziliensis</i> | 62  | 35   | 96   |
| LbrM34_V2.1810 | <i>L. braziliensis</i> | 47  | 154  | 200  |
| LbrM34_V2.1810 | <i>L. braziliensis</i> | 47  | 154  | 200  |
| LbrM34_V2.1830 | <i>L. braziliensis</i> | 44  | 37   | 80   |
| LbrM34_V2.1840 | <i>L. braziliensis</i> | 73  | 63   | 135  |
| LbrM34_V2.1840 | <i>L. braziliensis</i> | 69  | 199  | 267  |
| LbrM34_V2.1850 | <i>L. braziliensis</i> | 394 | 229  | 622  |
| LbrM34_V2.1880 | <i>L. braziliensis</i> | 116 | 138  | 253  |
| LbrM34_V2.1890 | <i>L. braziliensis</i> | 54  | 358  | 411  |
| LbrM34_V2.1890 | <i>L. braziliensis</i> | 164 | 428  | 591  |
| LbrM34_V2.1900 | <i>L. braziliensis</i> | 54  | 200  | 253  |

|                |                        |     |      |      |
|----------------|------------------------|-----|------|------|
| LbrM34_V2.1900 | <i>L. braziliensis</i> | 60  | 391  | 450  |
| LbrM34_V2.1900 | <i>L. braziliensis</i> | 45  | 543  | 587  |
| LbrM34_V2.1900 | <i>L. braziliensis</i> | 78  | 656  | 733  |
| LbrM34_V2.1900 | <i>L. braziliensis</i> | 49  | 771  | 819  |
| LbrM34_V2.1910 | <i>L. braziliensis</i> | 64  | 1    | 64   |
| LbrM34_V2.1910 | <i>L. braziliensis</i> | 47  | 409  | 455  |
| LbrM34_V2.1910 | <i>L. braziliensis</i> | 51  | 800  | 850  |
| LbrM34_V2.1920 | <i>L. braziliensis</i> | 120 | 130  | 249  |
| LbrM34_V2.1940 | <i>L. braziliensis</i> | 82  | 131  | 212  |
| LbrM34_V2.1940 | <i>L. braziliensis</i> | 78  | 304  | 381  |
| LbrM34_V2.1940 | <i>L. braziliensis</i> | 88  | 438  | 525  |
| LbrM34_V2.1940 | <i>L. braziliensis</i> | 45  | 1050 | 1094 |
| LbrM34_V2.1940 | <i>L. braziliensis</i> | 46  | 1152 | 1197 |
| LbrM34_V2.1940 | <i>L. braziliensis</i> | 79  | 1256 | 1334 |
| LbrM34_V2.1950 | <i>L. braziliensis</i> | 91  | 117  | 207  |
| LbrM34_V2.1950 | <i>L. braziliensis</i> | 41  | 638  | 678  |
| LbrM34_V2.1950 | <i>L. braziliensis</i> | 42  | 982  | 1023 |
| LbrM34_V2.1950 | <i>L. braziliensis</i> | 66  | 1814 | 1879 |
| LbrM34_V2.1950 | <i>L. braziliensis</i> | 43  | 2063 | 2105 |
| LbrM34_V2.1950 | <i>L. braziliensis</i> | 44  | 2428 | 2471 |
| LbrM34_V2.1950 | <i>L. braziliensis</i> | 43  | 2658 | 2700 |
| LbrM34_V2.1950 | <i>L. braziliensis</i> | 51  | 3076 | 3126 |
| LbrM34_V2.1950 | <i>L. braziliensis</i> | 91  | 3646 | 3736 |
| LbrM34_V2.1960 | <i>L. braziliensis</i> | 65  | 1    | 65   |
| LbrM34_V2.1970 | <i>L. braziliensis</i> | 54  | 1    | 54   |
| LbrM34_V2.1970 | <i>L. braziliensis</i> | 63  | 207  | 269  |
| LbrM34_V2.1970 | <i>L. braziliensis</i> | 94  | 396  | 489  |
| LbrM34_V2.1980 | <i>L. braziliensis</i> | 288 | 47   | 334  |
| LbrM34_V2.1990 | <i>L. braziliensis</i> | 75  | 1030 | 1104 |
| LbrM34_V2.2000 | <i>L. braziliensis</i> | 81  | 214  | 294  |
| LbrM34_V2.2000 | <i>L. braziliensis</i> | 89  | 481  | 569  |
| LbrM34_V2.2000 | <i>L. braziliensis</i> | 89  | 481  | 569  |
| LbrM34_V2.2010 | <i>L. braziliensis</i> | 45  | 85   | 129  |
| LbrM34_V2.2010 | <i>L. braziliensis</i> | 56  | 178  | 233  |
| LbrM34_V2.2010 | <i>L. braziliensis</i> | 88  | 552  | 639  |
| LbrM34_V2.2010 | <i>L. braziliensis</i> | 44  | 888  | 931  |
| LbrM34_V2.2020 | <i>L. braziliensis</i> | 160 | 87   | 246  |
| LbrM34_V2.2020 | <i>L. braziliensis</i> | 47  | 386  | 432  |
| LbrM34_V2.2020 | <i>L. braziliensis</i> | 64  | 625  | 688  |
| LbrM34_V2.2030 | <i>L. braziliensis</i> | 264 | 98   | 361  |
| LbrM34_V2.2030 | <i>L. braziliensis</i> | 58  | 370  | 427  |
| LbrM34_V2.2050 | <i>L. braziliensis</i> | 224 | 1    | 224  |
| LbrM34_V2.2060 | <i>L. braziliensis</i> | 72  | 69   | 140  |
| LbrM34_V2.2060 | <i>L. braziliensis</i> | 43  | 238  | 280  |
| LbrM34_V2.2060 | <i>L. braziliensis</i> | 43  | 238  | 280  |
| LbrM34_V2.2070 | <i>L. braziliensis</i> | 84  | 1    | 84   |
| LbrM34_V2.2070 | <i>L. braziliensis</i> | 87  | 387  | 473  |

|                |                        |     |      |      |
|----------------|------------------------|-----|------|------|
| LbrM34_V2.2070 | <i>L. braziliensis</i> | 87  | 387  | 473  |
| LbrM34_V2.2110 | <i>L. braziliensis</i> | 125 | 1    | 125  |
| LbrM34_V2.2110 | <i>L. braziliensis</i> | 52  | 297  | 348  |
| LbrM34_V2.2110 | <i>L. braziliensis</i> | 92  | 394  | 485  |
| LbrM34_V2.2110 | <i>L. braziliensis</i> | 88  | 627  | 714  |
| LbrM34_V2.2120 | <i>L. braziliensis</i> | 41  | 84   | 124  |
| LbrM34_V2.2130 | <i>L. braziliensis</i> | 93  | 103  | 195  |
| LbrM34_V2.2180 | <i>L. braziliensis</i> | 81  | 1    | 81   |
| LbrM34_V2.2180 | <i>L. braziliensis</i> | 62  | 148  | 209  |
| LbrM34_V2.2180 | <i>L. braziliensis</i> | 62  | 148  | 209  |
| LbrM34_V2.2190 | <i>L. braziliensis</i> | 97  | 56   | 152  |
| LbrM34_V2.2190 | <i>L. braziliensis</i> | 78  | 182  | 259  |
| LbrM34_V2.2190 | <i>L. braziliensis</i> | 46  | 273  | 318  |
| LbrM34_V2.2190 | <i>L. braziliensis</i> | 40  | 358  | 397  |
| LbrM34_V2.2190 | <i>L. braziliensis</i> | 63  | 455  | 517  |
| LbrM34_V2.2190 | <i>L. braziliensis</i> | 43  | 553  | 595  |
| LbrM34_V2.2190 | <i>L. braziliensis</i> | 49  | 771  | 819  |
| LbrM34_V2.2190 | <i>L. braziliensis</i> | 147 | 887  | 1033 |
| LbrM34_V2.2190 | <i>L. braziliensis</i> | 125 | 1206 | 1330 |
| LbrM34_V2.2190 | <i>L. braziliensis</i> | 42  | 1445 | 1486 |
| LbrM34_V2.2190 | <i>L. braziliensis</i> | 41  | 1522 | 1562 |
| LbrM34_V2.2190 | <i>L. braziliensis</i> | 48  | 1743 | 1790 |
| LbrM34_V2.2190 | <i>L. braziliensis</i> | 71  | 1845 | 1915 |
| LbrM34_V2.2190 | <i>L. braziliensis</i> | 119 | 2123 | 2241 |
| LbrM34_V2.2190 | <i>L. braziliensis</i> | 141 | 2388 | 2528 |
| LbrM34_V2.2200 | <i>L. braziliensis</i> | 177 | 200  | 376  |
| LbrM34_V2.2200 | <i>L. braziliensis</i> | 111 | 556  | 666  |
| LbrM34_V2.2200 | <i>L. braziliensis</i> | 73  | 880  | 952  |
| LbrM34_V2.2200 | <i>L. braziliensis</i> | 58  | 1457 | 1514 |
| LbrM34_V2.2210 | <i>L. braziliensis</i> | 53  | 121  | 173  |
| LbrM34_V2.2220 | <i>L. braziliensis</i> | 113 | 1    | 113  |
| LbrM34_V2.2220 | <i>L. braziliensis</i> | 42  | 614  | 655  |
| LbrM34_V2.2220 | <i>L. braziliensis</i> | 63  | 1078 | 1140 |
| LbrM34_V2.2230 | <i>L. braziliensis</i> | 61  | 1    | 61   |
| LbrM34_V2.2240 | <i>L. braziliensis</i> | 86  | 229  | 314  |
| LbrM34_V2.2240 | <i>L. braziliensis</i> | 56  | 538  | 593  |
| LbrM34_V2.2240 | <i>L. braziliensis</i> | 136 | 829  | 964  |
| LbrM34_V2.2240 | <i>L. braziliensis</i> | 82  | 1021 | 1102 |
| LbrM34_V2.2240 | <i>L. braziliensis</i> | 113 | 1222 | 1334 |
| LbrM34_V2.2250 | <i>L. braziliensis</i> | 110 | 1    | 110  |
| LbrM34_V2.2250 | <i>L. braziliensis</i> | 47  | 359  | 405  |
| LbrM34_V2.2260 | <i>L. braziliensis</i> | 45  | 12   | 56   |
| LbrM34_V2.2270 | <i>L. braziliensis</i> | 49  | 1    | 49   |
| LbrM34_V2.2270 | <i>L. braziliensis</i> | 41  | 76   | 116  |
| LbrM34_V2.2270 | <i>L. braziliensis</i> | 55  | 454  | 508  |
| LbrM34_V2.2270 | <i>L. braziliensis</i> | 118 | 607  | 724  |
| LbrM34_V2.2270 | <i>L. braziliensis</i> | 118 | 749  | 866  |



|                |                        |     |      |      |
|----------------|------------------------|-----|------|------|
| LbrM34_V2.2270 | <i>L. braziliensis</i> | 213 | 868  | 1080 |
| LbrM34_V2.2280 | <i>L. braziliensis</i> | 40  | 343  | 382  |
| LbrM34_V2.2310 | <i>L. braziliensis</i> | 43  | 1    | 43   |
| LbrM34_V2.2310 | <i>L. braziliensis</i> | 71  | 51   | 121  |
| LbrM34_V2.2310 | <i>L. braziliensis</i> | 45  | 144  | 188  |
| LbrM34_V2.2320 | <i>L. braziliensis</i> | 93  | 178  | 270  |
| LbrM34_V2.2320 | <i>L. braziliensis</i> | 52  | 320  | 371  |
| LbrM34_V2.2320 | <i>L. braziliensis</i> | 147 | 414  | 560  |
| LbrM34_V2.2330 | <i>L. braziliensis</i> | 43  | 1    | 43   |
| LbrM34_V2.2330 | <i>L. braziliensis</i> | 59  | 97   | 155  |
| LbrM34_V2.2330 | <i>L. braziliensis</i> | 62  | 414  | 475  |
| LbrM34_V2.2330 | <i>L. braziliensis</i> | 42  | 762  | 803  |
| LbrM34_V2.2330 | <i>L. braziliensis</i> | 80  | 1010 | 1089 |
| LbrM34_V2.2330 | <i>L. braziliensis</i> | 194 | 1106 | 1299 |
| LbrM34_V2.2340 | <i>L. braziliensis</i> | 55  | 98   | 152  |
| LbrM34_V2.2350 | <i>L. braziliensis</i> | 43  | 424  | 466  |
| LbrM34_V2.2350 | <i>L. braziliensis</i> | 61  | 780  | 840  |
| LbrM34_V2.2350 | <i>L. braziliensis</i> | 43  | 1180 | 1222 |
| LbrM34_V2.2360 | <i>L. braziliensis</i> | 492 | 1    | 492  |
| LbrM34_V2.2360 | <i>L. braziliensis</i> | 67  | 542  | 608  |
| LbrM34_V2.2360 | <i>L. braziliensis</i> | 69  | 859  | 927  |
| LbrM34_V2.2370 | <i>L. braziliensis</i> | 60  | 145  | 204  |
| LbrM34_V2.2370 | <i>L. braziliensis</i> | 47  | 316  | 362  |
| LbrM34_V2.2370 | <i>L. braziliensis</i> | 41  | 378  | 418  |
| LbrM34_V2.2380 | <i>L. braziliensis</i> | 51  | 27   | 77   |
| LbrM34_V2.2380 | <i>L. braziliensis</i> | 54  | 126  | 179  |
| LbrM34_V2.2380 | <i>L. braziliensis</i> | 92  | 236  | 327  |
| LbrM34_V2.2380 | <i>L. braziliensis</i> | 63  | 361  | 423  |
| LbrM34_V2.2380 | <i>L. braziliensis</i> | 190 | 463  | 652  |
| LbrM34_V2.2380 | <i>L. braziliensis</i> | 78  | 665  | 742  |
| LbrM34_V2.2400 | <i>L. braziliensis</i> | 56  | 184  | 239  |
| LbrM34_V2.2400 | <i>L. braziliensis</i> | 52  | 545  | 596  |
| LbrM34_V2.2400 | <i>L. braziliensis</i> | 41  | 794  | 834  |
| LbrM34_V2.2400 | <i>L. braziliensis</i> | 62  | 1022 | 1083 |
| LbrM34_V2.2400 | <i>L. braziliensis</i> | 69  | 1169 | 1237 |
| LbrM34_V2.2400 | <i>L. braziliensis</i> | 66  | 1378 | 1443 |
| LbrM34_V2.2400 | <i>L. braziliensis</i> | 107 | 1683 | 1789 |
| LbrM34_V2.2400 | <i>L. braziliensis</i> | 88  | 2165 | 2252 |
| LbrM34_V2.2410 | <i>L. braziliensis</i> | 209 | 1    | 209  |
| LbrM34_V2.2410 | <i>L. braziliensis</i> | 93  | 302  | 394  |
| LbrM34_V2.2420 | <i>L. braziliensis</i> | 257 | 1    | 257  |
| LbrM34_V2.2420 | <i>L. braziliensis</i> | 50  | 291  | 340  |
| LbrM34_V2.2430 | <i>L. braziliensis</i> | 95  | 16   | 110  |
| LbrM34_V2.2430 | <i>L. braziliensis</i> | 43  | 537  | 579  |
| LbrM34_V2.2430 | <i>L. braziliensis</i> | 296 | 822  | 1117 |
| LbrM34_V2.2430 | <i>L. braziliensis</i> | 40  | 1119 | 1158 |
| LbrM34_V2.2430 | <i>L. braziliensis</i> | 200 | 1201 | 1400 |

|                |                        |     |      |      |
|----------------|------------------------|-----|------|------|
| LbrM34_V2.2430 | <i>L. braziliensis</i> | 48  | 1435 | 1482 |
| LbrM34_V2.2430 | <i>L. braziliensis</i> | 53  | 1486 | 1538 |
| LbrM34_V2.2430 | <i>L. braziliensis</i> | 68  | 1544 | 1611 |
| LbrM34_V2.2440 | <i>L. braziliensis</i> | 60  | 183  | 242  |
| LbrM34_V2.2460 | <i>L. braziliensis</i> | 52  | 1    | 52   |
| LbrM34_V2.2460 | <i>L. braziliensis</i> | 97  | 56   | 152  |
| LbrM34_V2.2460 | <i>L. braziliensis</i> | 43  | 298  | 340  |
| LbrM34_V2.2480 | <i>L. braziliensis</i> | 153 | 1    | 153  |
| LbrM34_V2.2480 | <i>L. braziliensis</i> | 128 | 331  | 458  |
| LbrM34_V2.2490 | <i>L. braziliensis</i> | 53  | 25   | 77   |
| LbrM34_V2.2490 | <i>L. braziliensis</i> | 125 | 291  | 415  |
| LbrM34_V2.2500 | <i>L. braziliensis</i> | 151 | 68   | 218  |
| LbrM34_V2.2510 | <i>L. braziliensis</i> | 80  | 1    | 80   |
| LbrM34_V2.2510 | <i>L. braziliensis</i> | 66  | 124  | 189  |
| LbrM34_V2.2530 | <i>L. braziliensis</i> | 186 | 25   | 210  |
| LbrM34_V2.2540 | <i>L. braziliensis</i> | 54  | 1    | 54   |
| LbrM34_V2.2540 | <i>L. braziliensis</i> | 103 | 167  | 269  |
| LbrM34_V2.2540 | <i>L. braziliensis</i> | 117 | 289  | 405  |
| LbrM34_V2.2550 | <i>L. braziliensis</i> | 93  | 110  | 202  |
| LbrM34_V2.2550 | <i>L. braziliensis</i> | 151 | 395  | 545  |
| LbrM34_V2.2570 | <i>L. braziliensis</i> | 93  | 1    | 93   |
| LbrM34_V2.2570 | <i>L. braziliensis</i> | 312 | 113  | 424  |
| LbrM34_V2.2570 | <i>L. braziliensis</i> | 149 | 438  | 586  |
| LbrM34_V2.2570 | <i>L. braziliensis</i> | 74  | 595  | 668  |
| LbrM34_V2.2580 | <i>L. braziliensis</i> | 92  | 1    | 92   |
| LbrM34_V2.2590 | <i>L. braziliensis</i> | 57  | 332  | 388  |
| LbrM34_V2.2590 | <i>L. braziliensis</i> | 46  | 1059 | 1104 |
| LbrM34_V2.2590 | <i>L. braziliensis</i> | 72  | 1147 | 1218 |
| LbrM34_V2.2600 | <i>L. braziliensis</i> | 56  | 42   | 97   |
| LbrM34_V2.2600 | <i>L. braziliensis</i> | 95  | 165  | 259  |
| LbrM34_V2.2610 | <i>L. braziliensis</i> | 60  | 52   | 111  |
| LbrM34_V2.2610 | <i>L. braziliensis</i> | 60  | 149  | 208  |
| LbrM34_V2.2610 | <i>L. braziliensis</i> | 60  | 149  | 208  |
| LbrM34_V2.2620 | <i>L. braziliensis</i> | 184 | 89   | 272  |
| LbrM34_V2.2620 | <i>L. braziliensis</i> | 46  | 460  | 505  |
| LbrM34_V2.2620 | <i>L. braziliensis</i> | 46  | 697  | 742  |
| LbrM34_V2.2630 | <i>L. braziliensis</i> | 68  | 1    | 68   |
| LbrM34_V2.2640 | <i>L. braziliensis</i> | 55  | 284  | 338  |
| LbrM34_V2.2650 | <i>L. braziliensis</i> | 301 | 106  | 406  |
| LbrM34_V2.2650 | <i>L. braziliensis</i> | 95  | 411  | 505  |
| LbrM34_V2.2660 | <i>L. braziliensis</i> | 60  | 11   | 70   |
| LbrM34_V2.2660 | <i>L. braziliensis</i> | 128 | 300  | 427  |
| LbrM34_V2.2660 | <i>L. braziliensis</i> | 67  | 587  | 653  |
| LbrM34_V2.2670 | <i>L. braziliensis</i> | 40  | 61   | 100  |
| LbrM34_V2.2670 | <i>L. braziliensis</i> | 58  | 359  | 416  |
| LbrM34_V2.2670 | <i>L. braziliensis</i> | 74  | 941  | 1014 |
| LbrM34_V2.2680 | <i>L. braziliensis</i> | 47  | 273  | 319  |

|                |                        |     |     |     |
|----------------|------------------------|-----|-----|-----|
| LbrM34_V2.2680 | <i>L. braziliensis</i> | 45  | 527 | 571 |
| LbrM34_V2.2680 | <i>L. braziliensis</i> | 83  | 580 | 662 |
| LbrM34_V2.2690 | <i>L. braziliensis</i> | 46  | 318 | 363 |
| LbrM34_V2.2710 | <i>L. braziliensis</i> | 41  | 265 | 305 |
| LbrM34_V2.2710 | <i>L. braziliensis</i> | 83  | 356 | 438 |
| LbrM34_V2.2730 | <i>L. braziliensis</i> | 194 | 231 | 424 |
| LbrM34_V2.2740 | <i>L. braziliensis</i> | 41  | 282 | 322 |
| LbrM34_V2.2760 | <i>L. braziliensis</i> | 194 | 286 | 479 |
| LbrM34_V2.2770 | <i>L. braziliensis</i> | 153 | 1   | 153 |
| LbrM34_V2.2780 | <i>L. braziliensis</i> | 45  | 139 | 183 |
| LbrM34_V2.2780 | <i>L. braziliensis</i> | 90  | 379 | 468 |
| LbrM34_V2.2780 | <i>L. braziliensis</i> | 45  | 510 | 554 |
| LbrM34_V2.2780 | <i>L. braziliensis</i> | 51  | 565 | 615 |
| LbrM34_V2.2800 | <i>L. braziliensis</i> | 58  | 207 | 264 |
| LbrM34_V2.2800 | <i>L. braziliensis</i> | 40  | 270 | 309 |
| LbrM34_V2.2800 | <i>L. braziliensis</i> | 105 | 361 | 465 |
| LbrM34_V2.2810 | <i>L. braziliensis</i> | 46  | 289 | 334 |
| LbrM34_V2.2820 | <i>L. braziliensis</i> | 53  | 1   | 53  |
| LbrM34_V2.2830 | <i>L. braziliensis</i> | 58  | 30  | 87  |
| LbrM34_V2.2830 | <i>L. braziliensis</i> | 62  | 90  | 151 |
| LbrM34_V2.2830 | <i>L. braziliensis</i> | 59  | 225 | 283 |
| LbrM34_V2.2830 | <i>L. braziliensis</i> | 54  | 318 | 371 |
| LbrM34_V2.2830 | <i>L. braziliensis</i> | 148 | 546 | 693 |
| LbrM34_V2.2850 | <i>L. braziliensis</i> | 76  | 1   | 76  |
| LbrM34_V2.2860 | <i>L. braziliensis</i> | 70  | 921 | 990 |
| LbrM34_V2.2870 | <i>L. braziliensis</i> | 60  | 510 | 569 |
| LbrM34_V2.2880 | <i>L. braziliensis</i> | 86  | 145 | 230 |
| LbrM34_V2.2880 | <i>L. braziliensis</i> | 49  | 332 | 380 |
| LbrM34_V2.2890 | <i>L. braziliensis</i> | 268 | 1   | 268 |
| LbrM34_V2.2890 | <i>L. braziliensis</i> | 86  | 393 | 478 |
| LbrM34_V2.2900 | <i>L. braziliensis</i> | 55  | 20  | 74  |
| LbrM34_V2.2900 | <i>L. braziliensis</i> | 44  | 369 | 412 |
| LbrM34_V2.2950 | <i>L. braziliensis</i> | 46  | 11  | 56  |
| LbrM34_V2.2960 | <i>L. braziliensis</i> | 109 | 86  | 194 |
| LbrM34_V2.2960 | <i>L. braziliensis</i> | 60  | 273 | 332 |
| LbrM34_V2.2960 | <i>L. braziliensis</i> | 56  | 357 | 412 |
| LbrM34_V2.2970 | <i>L. braziliensis</i> | 43  | 355 | 397 |
| LbrM34_V2.2970 | <i>L. braziliensis</i> | 50  | 864 | 913 |
| LbrM34_V2.2970 | <i>L. braziliensis</i> | 50  | 864 | 913 |
| LbrM34_V2.2980 | <i>L. braziliensis</i> | 53  | 1   | 53  |
| LbrM34_V2.2990 | <i>L. braziliensis</i> | 43  | 470 | 512 |
| LbrM34_V2.3000 | <i>L. braziliensis</i> | 75  | 67  | 141 |
| LbrM34_V2.3000 | <i>L. braziliensis</i> | 59  | 186 | 244 |
| LbrM34_V2.3000 | <i>L. braziliensis</i> | 50  | 379 | 428 |
| LbrM34_V2.3010 | <i>L. braziliensis</i> | 368 | 1   | 368 |
| LbrM34_V2.3010 | <i>L. braziliensis</i> | 71  | 790 | 860 |
| LbrM34_V2.3020 | <i>L. braziliensis</i> | 41  | 160 | 200 |

|                |                        |     |      |      |
|----------------|------------------------|-----|------|------|
| LbrM34_V2.3020 | <i>L. braziliensis</i> | 49  | 340  | 388  |
| LbrM34_V2.3020 | <i>L. braziliensis</i> | 49  | 340  | 388  |
| LbrM34_V2.3030 | <i>L. braziliensis</i> | 62  | 69   | 130  |
| LbrM34_V2.3030 | <i>L. braziliensis</i> | 41  | 187  | 227  |
| LbrM34_V2.3030 | <i>L. braziliensis</i> | 49  | 894  | 942  |
| LbrM34_V2.3030 | <i>L. braziliensis</i> | 64  | 966  | 1029 |
| LbrM34_V2.3030 | <i>L. braziliensis</i> | 67  | 1274 | 1340 |
| LbrM34_V2.3030 | <i>L. braziliensis</i> | 99  | 1353 | 1451 |
| LbrM34_V2.3030 | <i>L. braziliensis</i> | 45  | 1461 | 1505 |
| LbrM34_V2.3030 | <i>L. braziliensis</i> | 45  | 1533 | 1577 |
| LbrM34_V2.3030 | <i>L. braziliensis</i> | 91  | 1617 | 1707 |
| LbrM34_V2.3030 | <i>L. braziliensis</i> | 49  | 1712 | 1760 |
| LbrM34_V2.3040 | <i>L. braziliensis</i> | 55  | 1    | 55   |
| LbrM34_V2.3060 | <i>L. braziliensis</i> | 73  | 1    | 73   |
| LbrM34_V2.3060 | <i>L. braziliensis</i> | 149 | 208  | 356  |
| LbrM34_V2.3080 | <i>L. braziliensis</i> | 396 | 1    | 396  |
| LbrM34_V2.3080 | <i>L. braziliensis</i> | 154 | 430  | 583  |
| LbrM34_V2.3080 | <i>L. braziliensis</i> | 108 | 789  | 896  |
| LbrM34_V2.3080 | <i>L. braziliensis</i> | 246 | 1129 | 1374 |
| LbrM34_V2.3080 | <i>L. braziliensis</i> | 189 | 1398 | 1586 |
| LbrM34_V2.3080 | <i>L. braziliensis</i> | 43  | 1720 | 1762 |
| LbrM34_V2.3090 | <i>L. braziliensis</i> | 44  | 1    | 44   |
| LbrM34_V2.3090 | <i>L. braziliensis</i> | 41  | 55   | 95   |
| LbrM34_V2.3090 | <i>L. braziliensis</i> | 72  | 124  | 195  |
| LbrM34_V2.3100 | <i>L. braziliensis</i> | 40  | 1    | 40   |
| LbrM34_V2.3100 | <i>L. braziliensis</i> | 54  | 164  | 217  |
| LbrM34_V2.3100 | <i>L. braziliensis</i> | 239 | 301  | 539  |
| LbrM34_V2.3100 | <i>L. braziliensis</i> | 48  | 549  | 596  |
| LbrM34_V2.3100 | <i>L. braziliensis</i> | 69  | 740  | 808  |
| LbrM34_V2.3110 | <i>L. braziliensis</i> | 124 | 383  | 506  |
| LbrM34_V2.3110 | <i>L. braziliensis</i> | 73  | 517  | 589  |
| LbrM34_V2.3110 | <i>L. braziliensis</i> | 102 | 595  | 696  |
| LbrM34_V2.3120 | <i>L. braziliensis</i> | 170 | 52   | 221  |
| LbrM34_V2.3150 | <i>L. braziliensis</i> | 108 | 1    | 108  |
| LbrM34_V2.3150 | <i>L. braziliensis</i> | 249 | 210  | 458  |
| LbrM34_V2.3150 | <i>L. braziliensis</i> | 167 | 492  | 658  |
| LbrM34_V2.3150 | <i>L. braziliensis</i> | 112 | 689  | 800  |
| LbrM34_V2.3170 | <i>L. braziliensis</i> | 205 | 1    | 205  |
| LbrM34_V2.3170 | <i>L. braziliensis</i> | 85  | 228  | 312  |
| LbrM34_V2.3180 | <i>L. braziliensis</i> | 170 | 19   | 188  |
| LbrM34_V2.3190 | <i>L. braziliensis</i> | 103 | 1    | 103  |
| LbrM34_V2.3200 | <i>L. braziliensis</i> | 103 | 1    | 103  |
| LbrM34_V2.3210 | <i>L. braziliensis</i> | 82  | 302  | 383  |
| LbrM34_V2.3210 | <i>L. braziliensis</i> | 55  | 453  | 507  |
| LbrM34_V2.3210 | <i>L. braziliensis</i> | 47  | 552  | 598  |
| LbrM34_V2.3220 | <i>L. braziliensis</i> | 159 | 116  | 274  |
| LbrM34_V2.3240 | <i>L. braziliensis</i> | 42  | 321  | 362  |

|                |                        |     |      |      |
|----------------|------------------------|-----|------|------|
| LbrM34_V2.3250 | <i>L. braziliensis</i> | 40  | 129  | 168  |
| LbrM34_V2.3260 | <i>L. braziliensis</i> | 105 | 358  | 462  |
| LbrM34_V2.3270 | <i>L. braziliensis</i> | 55  | 584  | 638  |
| LbrM34_V2.3270 | <i>L. braziliensis</i> | 54  | 982  | 1035 |
| LbrM34_V2.3270 | <i>L. braziliensis</i> | 45  | 1701 | 1745 |
| LbrM34_V2.3270 | <i>L. braziliensis</i> | 56  | 2021 | 2076 |
| LbrM34_V2.3280 | <i>L. braziliensis</i> | 129 | 1    | 129  |
| LbrM34_V2.3290 | <i>L. braziliensis</i> | 94  | 438  | 531  |
| LbrM34_V2.3300 | <i>L. braziliensis</i> | 42  | 172  | 213  |
| LbrM34_V2.3310 | <i>L. braziliensis</i> | 46  | 251  | 296  |
| LbrM34_V2.3320 | <i>L. braziliensis</i> | 42  | 1    | 42   |
| LbrM34_V2.3320 | <i>L. braziliensis</i> | 48  | 93   | 140  |
| LbrM34_V2.3320 | <i>L. braziliensis</i> | 48  | 551  | 598  |
| LbrM34_V2.3330 | <i>L. braziliensis</i> | 125 | 1    | 125  |
| LbrM34_V2.3340 | <i>L. braziliensis</i> | 60  | 160  | 219  |
| LbrM34_V2.3340 | <i>L. braziliensis</i> | 61  | 481  | 541  |
| LbrM34_V2.3340 | <i>L. braziliensis</i> | 61  | 481  | 541  |
| LbrM34_V2.3360 | <i>L. braziliensis</i> | 60  | 45   | 104  |
| LbrM34_V2.3360 | <i>L. braziliensis</i> | 95  | 376  | 470  |
| LbrM34_V2.3370 | <i>L. braziliensis</i> | 83  | 48   | 130  |
| LbrM34_V2.3380 | <i>L. braziliensis</i> | 52  | 286  | 337  |
| LbrM34_V2.3390 | <i>L. braziliensis</i> | 120 | 222  | 341  |
| LbrM34_V2.3410 | <i>L. braziliensis</i> | 105 | 140  | 244  |
| LbrM34_V2.3410 | <i>L. braziliensis</i> | 308 | 431  | 738  |
| LbrM34_V2.3420 | <i>L. braziliensis</i> | 241 | 186  | 426  |
| LbrM34_V2.3430 | <i>L. braziliensis</i> | 111 | 73   | 183  |
| LbrM34_V2.3440 | <i>L. braziliensis</i> | 72  | 72   | 143  |
| LbrM34_V2.3440 | <i>L. braziliensis</i> | 360 | 192  | 551  |
| LbrM34_V2.3440 | <i>L. braziliensis</i> | 70  | 885  | 954  |
| LbrM34_V2.3440 | <i>L. braziliensis</i> | 83  | 986  | 1068 |
| LbrM34_V2.3440 | <i>L. braziliensis</i> | 75  | 1087 | 1161 |
| LbrM34_V2.3450 | <i>L. braziliensis</i> | 187 | 1    | 187  |
| LbrM34_V2.3450 | <i>L. braziliensis</i> | 53  | 413  | 465  |
| LbrM34_V2.3450 | <i>L. braziliensis</i> | 53  | 413  | 465  |
| LbrM34_V2.3460 | <i>L. braziliensis</i> | 103 | 28   | 130  |
| LbrM34_V2.3480 | <i>L. braziliensis</i> | 42  | 1    | 42   |
| LbrM34_V2.3480 | <i>L. braziliensis</i> | 221 | 120  | 340  |
| LbrM34_V2.3480 | <i>L. braziliensis</i> | 226 | 374  | 599  |
| LbrM34_V2.3480 | <i>L. braziliensis</i> | 79  | 670  | 748  |
| LbrM34_V2.3490 | <i>L. braziliensis</i> | 74  | 295  | 368  |
| LbrM34_V2.3500 | <i>L. braziliensis</i> | 42  | 1    | 42   |
| LbrM34_V2.3500 | <i>L. braziliensis</i> | 221 | 120  | 340  |
| LbrM34_V2.3500 | <i>L. braziliensis</i> | 226 | 374  | 599  |
| LbrM34_V2.3530 | <i>L. braziliensis</i> | 168 | 1    | 168  |
| LbrM34_V2.3530 | <i>L. braziliensis</i> | 55  | 781  | 835  |
| LbrM34_V2.3530 | <i>L. braziliensis</i> | 86  | 986  | 1071 |
| LbrM34_V2.3530 | <i>L. braziliensis</i> | 62  | 1097 | 1158 |

|                |                        |     |      |      |
|----------------|------------------------|-----|------|------|
| LbrM34_V2.3550 | <i>L. braziliensis</i> | 105 | 231  | 335  |
| LbrM34_V2.3550 | <i>L. braziliensis</i> | 326 | 403  | 728  |
| LbrM34_V2.3550 | <i>L. braziliensis</i> | 60  | 970  | 1029 |
| LbrM34_V2.3560 | <i>L. braziliensis</i> | 60  | 1    | 60   |
| LbrM34_V2.3590 | <i>L. braziliensis</i> | 63  | 558  | 620  |
| LbrM34_V2.3610 | <i>L. braziliensis</i> | 57  | 51   | 107  |
| LbrM34_V2.3610 | <i>L. braziliensis</i> | 65  | 138  | 202  |
| LbrM34_V2.3620 | <i>L. braziliensis</i> | 220 | 1    | 220  |
| LbrM34_V2.3620 | <i>L. braziliensis</i> | 48  | 251  | 298  |
| LbrM34_V2.3620 | <i>L. braziliensis</i> | 48  | 251  | 298  |
| LbrM34_V2.3630 | <i>L. braziliensis</i> | 53  | 724  | 776  |
| LbrM34_V2.3630 | <i>L. braziliensis</i> | 42  | 810  | 851  |
| LbrM34_V2.3630 | <i>L. braziliensis</i> | 48  | 1012 | 1059 |
| LbrM34_V2.3630 | <i>L. braziliensis</i> | 83  | 1260 | 1342 |
| LbrM34_V2.3690 | <i>L. braziliensis</i> | 96  | 1    | 96   |
| LbrM34_V2.3700 | <i>L. braziliensis</i> | 114 | 1    | 114  |
| LbrM34_V2.3700 | <i>L. braziliensis</i> | 144 | 173  | 316  |
| LbrM34_V2.3700 | <i>L. braziliensis</i> | 56  | 385  | 440  |
| LbrM34_V2.3710 | <i>L. braziliensis</i> | 96  | 10   | 105  |
| LbrM34_V2.3710 | <i>L. braziliensis</i> | 79  | 141  | 219  |
| LbrM34_V2.3710 | <i>L. braziliensis</i> | 67  | 252  | 318  |
| LbrM34_V2.3710 | <i>L. braziliensis</i> | 47  | 435  | 481  |
| LbrM34_V2.3720 | <i>L. braziliensis</i> | 57  | 85   | 141  |
| LbrM34_V2.3730 | <i>L. braziliensis</i> | 48  | 197  | 244  |
| LbrM34_V2.3730 | <i>L. braziliensis</i> | 62  | 307  | 368  |
| LbrM34_V2.3730 | <i>L. braziliensis</i> | 53  | 495  | 547  |
| LbrM34_V2.3730 | <i>L. braziliensis</i> | 126 | 566  | 691  |
| LbrM34_V2.3740 | <i>L. braziliensis</i> | 40  | 1    | 40   |
| LbrM34_V2.3750 | <i>L. braziliensis</i> | 72  | 225  | 296  |
| LbrM34_V2.3760 | <i>L. braziliensis</i> | 40  | 1    | 40   |
| LbrM34_V2.3800 | <i>L. braziliensis</i> | 55  | 1    | 55   |
| LbrM34_V2.3800 | <i>L. braziliensis</i> | 85  | 66   | 150  |
| LbrM34_V2.3800 | <i>L. braziliensis</i> | 47  | 159  | 205  |
| LbrM34_V2.3800 | <i>L. braziliensis</i> | 40  | 310  | 349  |
| LbrM34_V2.3830 | <i>L. braziliensis</i> | 87  | 226  | 312  |
| LbrM34_V2.3840 | <i>L. braziliensis</i> | 50  | 522  | 571  |
| LbrM34_V2.3860 | <i>L. braziliensis</i> | 67  | 378  | 444  |
| LbrM34_V2.3870 | <i>L. braziliensis</i> | 45  | 25   | 69   |
| LbrM34_V2.3910 | <i>L. braziliensis</i> | 392 | 35   | 426  |
| LbrM34_V2.3920 | <i>L. braziliensis</i> | 42  | 19   | 60   |
| LbrM34_V2.3930 | <i>L. braziliensis</i> | 78  | 1    | 78   |
| LbrM34_V2.3940 | <i>L. braziliensis</i> | 50  | 1    | 50   |
| LbrM34_V2.3940 | <i>L. braziliensis</i> | 46  | 500  | 545  |
| LbrM34_V2.3940 | <i>L. braziliensis</i> | 45  | 829  | 873  |
| LbrM34_V2.3940 | <i>L. braziliensis</i> | 40  | 2081 | 2120 |
| LbrM34_V2.3950 | <i>L. braziliensis</i> | 233 | 79   | 311  |
| LbrM34_V2.3950 | <i>L. braziliensis</i> | 42  | 442  | 483  |

|                |                        |     |      |      |
|----------------|------------------------|-----|------|------|
| LbrM34_V2.3950 | <i>L. braziliensis</i> | 92  | 598  | 689  |
| LbrM34_V2.3960 | <i>L. braziliensis</i> | 743 | 30   | 772  |
| LbrM34_V2.3980 | <i>L. braziliensis</i> | 135 | 1    | 135  |
| LbrM34_V2.3980 | <i>L. braziliensis</i> | 65  | 228  | 292  |
| LbrM34_V2.3980 | <i>L. braziliensis</i> | 54  | 332  | 385  |
| LbrM34_V2.3980 | <i>L. braziliensis</i> | 111 | 403  | 513  |
| LbrM34_V2.3980 | <i>L. braziliensis</i> | 84  | 570  | 653  |
| LbrM34_V2.3990 | <i>L. braziliensis</i> | 52  | 1    | 52   |
| LbrM34_V2.4000 | <i>L. braziliensis</i> | 63  | 87   | 149  |
| LbrM34_V2.4010 | <i>L. braziliensis</i> | 93  | 404  | 496  |
| LbrM34_V2.4010 | <i>L. braziliensis</i> | 122 | 570  | 691  |
| LbrM34_V2.4010 | <i>L. braziliensis</i> | 122 | 570  | 691  |
| LbrM34_V2.4020 | <i>L. braziliensis</i> | 48  | 35   | 82   |
| LbrM34_V2.4020 | <i>L. braziliensis</i> | 200 | 114  | 313  |
| LbrM34_V2.4020 | <i>L. braziliensis</i> | 40  | 335  | 374  |
| LbrM34_V2.4040 | <i>L. braziliensis</i> | 52  | 237  | 288  |
| LbrM34_V2.4040 | <i>L. braziliensis</i> | 76  | 375  | 450  |
| LbrM34_V2.4040 | <i>L. braziliensis</i> | 287 | 453  | 739  |
| LbrM34_V2.4040 | <i>L. braziliensis</i> | 160 | 908  | 1067 |
| LbrM34_V2.4060 | <i>L. braziliensis</i> | 43  | 141  | 183  |
| LbrM34_V2.4060 | <i>L. braziliensis</i> | 52  | 287  | 338  |
| LbrM34_V2.4060 | <i>L. braziliensis</i> | 52  | 287  | 338  |
| LbrM34_V2.4070 | <i>L. braziliensis</i> | 106 | 1    | 106  |
| LbrM34_V2.4070 | <i>L. braziliensis</i> | 435 | 134  | 568  |
| LbrM34_V2.4070 | <i>L. braziliensis</i> | 119 | 706  | 824  |
| LbrM34_V2.4070 | <i>L. braziliensis</i> | 44  | 845  | 888  |
| LbrM34_V2.4070 | <i>L. braziliensis</i> | 102 | 906  | 1007 |
| LbrM34_V2.4070 | <i>L. braziliensis</i> | 45  | 1020 | 1064 |
| LbrM34_V2.4090 | <i>L. braziliensis</i> | 55  | 1    | 55   |
| LbrM34_V2.4100 | <i>L. braziliensis</i> | 84  | 54   | 137  |
| LbrM34_V2.4110 | <i>L. braziliensis</i> | 90  | 80   | 169  |
| LbrM34_V2.4110 | <i>L. braziliensis</i> | 60  | 214  | 273  |
| LbrM34_V2.4110 | <i>L. braziliensis</i> | 117 | 409  | 525  |
| LbrM34_V2.4110 | <i>L. braziliensis</i> | 168 | 579  | 746  |
| LbrM34_V2.4110 | <i>L. braziliensis</i> | 62  | 766  | 827  |
| LbrM34_V2.4120 | <i>L. braziliensis</i> | 583 | 1    | 583  |
| LbrM34_V2.4130 | <i>L. braziliensis</i> | 70  | 236  | 305  |
| LbrM34_V2.4130 | <i>L. braziliensis</i> | 152 | 368  | 519  |
| LbrM34_V2.4140 | <i>L. braziliensis</i> | 54  | 241  | 294  |
| LbrM34_V2.4150 | <i>L. braziliensis</i> | 93  | 1    | 93   |
| LbrM34_V2.4150 | <i>L. braziliensis</i> | 101 | 131  | 231  |
| LbrM34_V2.4170 | <i>L. braziliensis</i> | 196 | 41   | 236  |
| LbrM34_V2.4190 | <i>L. braziliensis</i> | 84  | 1    | 84   |
| LbrM34_V2.4200 | <i>L. braziliensis</i> | 389 | 17   | 405  |
| LbrM34_V2.4200 | <i>L. braziliensis</i> | 121 | 481  | 601  |
| LbrM34_V2.4210 | <i>L. braziliensis</i> | 74  | 145  | 218  |
| LbrM34_V2.4210 | <i>L. braziliensis</i> | 63  | 304  | 366  |

|                |                        |     |      |      |
|----------------|------------------------|-----|------|------|
| LbrM34_V2.4210 | <i>L. braziliensis</i> | 70  | 612  | 681  |
| LbrM34_V2.4240 | <i>L. braziliensis</i> | 177 | 74   | 250  |
| LbrM34_V2.4260 | <i>L. braziliensis</i> | 152 | 1    | 152  |
| LbrM34_V2.4260 | <i>L. braziliensis</i> | 119 | 298  | 416  |
| LbrM34_V2.4260 | <i>L. braziliensis</i> | 55  | 455  | 509  |
| LbrM34_V2.4260 | <i>L. braziliensis</i> | 82  | 514  | 595  |
| LbrM34_V2.4260 | <i>L. braziliensis</i> | 116 | 682  | 797  |
| LbrM34_V2.4270 | <i>L. braziliensis</i> | 64  | 72   | 135  |
| LbrM34_V2.4270 | <i>L. braziliensis</i> | 127 | 149  | 275  |
| LbrM34_V2.4270 | <i>L. braziliensis</i> | 127 | 149  | 275  |
| LbrM34_V2.4280 | <i>L. braziliensis</i> | 41  | 33   | 73   |
| LbrM34_V2.4280 | <i>L. braziliensis</i> | 40  | 187  | 226  |
| LbrM34_V2.4280 | <i>L. braziliensis</i> | 40  | 187  | 226  |
| LbrM34_V2.4300 | <i>L. braziliensis</i> | 50  | 42   | 91   |
| LbrM34_V2.4310 | <i>L. braziliensis</i> | 74  | 1    | 74   |
| LbrM34_V2.4310 | <i>L. braziliensis</i> | 81  | 214  | 294  |
| LbrM34_V2.4310 | <i>L. braziliensis</i> | 208 | 403  | 610  |
| LbrM34_V2.4330 | <i>L. braziliensis</i> | 53  | 238  | 290  |
| LbrM34_V2.4340 | <i>L. braziliensis</i> | 91  | 675  | 765  |
| LbrM34_V2.4340 | <i>L. braziliensis</i> | 141 | 1215 | 1355 |
| LbrM34_V2.4340 | <i>L. braziliensis</i> | 40  | 2087 | 2126 |
| LbrM34_V2.4350 | <i>L. braziliensis</i> | 46  | 69   | 114  |
| LbrM34_V2.4360 | <i>L. braziliensis</i> | 480 | 46   | 525  |
| LbrM34_V2.4380 | <i>L. braziliensis</i> | 60  | 10   | 69   |
| LbrM34_V2.4380 | <i>L. braziliensis</i> | 70  | 82   | 151  |
| LbrM34_V2.4380 | <i>L. braziliensis</i> | 44  | 162  | 205  |
| LbrM34_V2.4430 | <i>L. braziliensis</i> | 46  | 1    | 46   |
| LbrM34_V2.4430 | <i>L. braziliensis</i> | 83  | 101  | 183  |
| LbrM34_V2.4430 | <i>L. braziliensis</i> | 43  | 222  | 264  |
| LbrM34_V2.4450 | <i>L. braziliensis</i> | 91  | 111  | 201  |
| LbrM34_V2.4490 | <i>L. braziliensis</i> | 69  | 1    | 69   |
| LbrM34_V2.4510 | <i>L. braziliensis</i> | 57  | 258  | 314  |
| LbrM34_V2.4510 | <i>L. braziliensis</i> | 72  | 515  | 586  |
| LbrM34_V2.4510 | <i>L. braziliensis</i> | 72  | 515  | 586  |
| LbrM34_V2.4520 | <i>L. braziliensis</i> | 54  | 438  | 491  |
| LbrM34_V2.4520 | <i>L. braziliensis</i> | 41  | 919  | 959  |
| LbrM34_V2.4520 | <i>L. braziliensis</i> | 41  | 919  | 959  |
| LbrM34_V2.4540 | <i>L. braziliensis</i> | 62  | 118  | 179  |
| LbrM34_V2.4560 | <i>L. braziliensis</i> | 54  | 331  | 384  |
| LbrM34_V2.4560 | <i>L. braziliensis</i> | 158 | 403  | 560  |
| LbrM34_V2.4580 | <i>L. braziliensis</i> | 436 | 87   | 522  |
| LbrM34_V2.4600 | <i>L. braziliensis</i> | 52  | 231  | 282  |
| LbrM34_V2.4620 | <i>L. braziliensis</i> | 114 | 1    | 114  |
| LbrM34_V2.4630 | <i>L. braziliensis</i> | 137 | 28   | 164  |
| LbrM34_V2.4640 | <i>L. braziliensis</i> | 81  | 116  | 196  |
| LbrM34_V2.4650 | <i>L. braziliensis</i> | 135 | 295  | 429  |
| LbrM34_V2.4670 | <i>L. braziliensis</i> | 46  | 211  | 256  |



|                |                        |     |      |      |
|----------------|------------------------|-----|------|------|
| LbrM34_V2.4730 | <i>L. braziliensis</i> | 54  | 301  | 354  |
| LbrM34_V2.4750 | <i>L. braziliensis</i> | 41  | 1    | 41   |
| LbrM34_V2.4760 | <i>L. braziliensis</i> | 63  | 1    | 63   |
| LbrM34_V2.4760 | <i>L. braziliensis</i> | 148 | 1319 | 1466 |
| LbrM34_V2.4790 | <i>L. braziliensis</i> | 49  | 329  | 377  |
| LbrM34_V2.4800 | <i>L. braziliensis</i> | 41  | 1    | 41   |
| LbrM34_V2.4820 | <i>L. braziliensis</i> | 64  | 1    | 64   |
| LbrM34_V2.4830 | <i>L. braziliensis</i> | 874 | 39   | 912  |
| LbrM34_V2.4860 | <i>L. braziliensis</i> | 81  | 1    | 81   |
| LbrM34_V2.4870 | <i>L. braziliensis</i> | 166 | 751  | 916  |
| LbrM34_V2.4880 | <i>L. braziliensis</i> | 57  | 1    | 57   |
| LbrM34_V2.4880 | <i>L. braziliensis</i> | 72  | 93   | 164  |
| LbrM34_V2.4880 | <i>L. braziliensis</i> | 72  | 93   | 164  |
| LbrM34_V2.4890 | <i>L. braziliensis</i> | 158 | 29   | 186  |
| LbrM34_V2.4900 | <i>L. braziliensis</i> | 60  | 1    | 60   |
| LbrM34_V2.4900 | <i>L. braziliensis</i> | 577 | 175  | 751  |
| LbrM34_V2.4900 | <i>L. braziliensis</i> | 188 | 805  | 992  |
| LbrM34_V2.4910 | <i>L. braziliensis</i> | 65  | 1    | 65   |
| LbrM34_V2.4910 | <i>L. braziliensis</i> | 44  | 105  | 148  |
| LbrM34_V2.4910 | <i>L. braziliensis</i> | 44  | 105  | 148  |
| LbrM34_V2.4930 | <i>L. braziliensis</i> | 61  | 325  | 385  |
| LbrM34_V2.4940 | <i>L. braziliensis</i> | 81  | 1    | 81   |
| LbrM34_V2.4950 | <i>L. braziliensis</i> | 122 | 270  | 391  |
| LbrM34_V2.4960 | <i>L. braziliensis</i> | 43  | 96   | 138  |
| LbrM34_V2.4960 | <i>L. braziliensis</i> | 57  | 437  | 493  |
| LbrM34_V2.4960 | <i>L. braziliensis</i> | 57  | 437  | 493  |
| LbrM34_V2.4970 | <i>L. braziliensis</i> | 128 | 34   | 161  |
| LbrM34_V2.4970 | <i>L. braziliensis</i> | 86  | 174  | 259  |
| LbrM34_V2.4980 | <i>L. braziliensis</i> | 118 | 381  | 498  |
| LbrM34_V2.4990 | <i>L. braziliensis</i> | 279 | 62   | 340  |
| LbrM34_V2.4990 | <i>L. braziliensis</i> | 271 | 375  | 645  |
| LbrM34_V2.5000 | <i>L. braziliensis</i> | 65  | 87   | 151  |
| LbrM34_V2.5000 | <i>L. braziliensis</i> | 63  | 270  | 332  |
| LbrM34_V2.5030 | <i>L. braziliensis</i> | 56  | 1    | 56   |
| LbrM34_V2.5050 | <i>L. braziliensis</i> | 43  | 61   | 103  |
| LbrM34_V2.5050 | <i>L. braziliensis</i> | 60  | 224  | 283  |
| LbrM34_V2.5050 | <i>L. braziliensis</i> | 60  | 224  | 283  |
| LbrM34_V2.5070 | <i>L. braziliensis</i> | 161 | 34   | 194  |
| LbrM34_V2.5070 | <i>L. braziliensis</i> | 41  | 262  | 302  |
| LbrM34_V2.5070 | <i>L. braziliensis</i> | 43  | 326  | 368  |
| LbrM34_V2.5090 | <i>L. braziliensis</i> | 41  | 261  | 301  |
| LbrM34_V2.5120 | <i>L. braziliensis</i> | 85  | 1    | 85   |
| LbrM34_V2.5150 | <i>L. braziliensis</i> | 41  | 162  | 202  |
| LbrM34_V2.5150 | <i>L. braziliensis</i> | 50  | 208  | 257  |
| LbrM34_V2.5150 | <i>L. braziliensis</i> | 50  | 208  | 257  |
| LbrM34_V2.5160 | <i>L. braziliensis</i> | 62  | 403  | 464  |
| LbrM34_V2.5170 | <i>L. braziliensis</i> | 53  | 1    | 53   |

|                |                        |     |      |      |
|----------------|------------------------|-----|------|------|
| LbrM34_V2.5170 | <i>L. braziliensis</i> | 72  | 98   | 169  |
| LbrM34_V2.5170 | <i>L. braziliensis</i> | 48  | 215  | 262  |
| LbrM34_V2.5210 | <i>L. braziliensis</i> | 41  | 108  | 148  |
| LbrM34_V2.5230 | <i>L. braziliensis</i> | 50  | 64   | 113  |
| LbrM34_V2.5240 | <i>L. braziliensis</i> | 44  | 169  | 212  |
| LbrM34_V2.5250 | <i>L. braziliensis</i> | 63  | 1    | 63   |
| LbrM34_V2.5260 | <i>L. braziliensis</i> | 49  | 1    | 49   |
| LbrM34_V2.5260 | <i>L. braziliensis</i> | 66  | 86   | 151  |
| LbrM34_V2.5260 | <i>L. braziliensis</i> | 66  | 86   | 151  |
| LbrM34_V2.5280 | <i>L. braziliensis</i> | 48  | 154  | 201  |
| LbrM34_V2.5330 | <i>L. braziliensis</i> | 114 | 1    | 114  |
| LbrM34_V2.5330 | <i>L. braziliensis</i> | 66  | 1458 | 1523 |
| LbrM34_V2.5330 | <i>L. braziliensis</i> | 66  | 2455 | 2520 |
| LbrM34_V2.5330 | <i>L. braziliensis</i> | 62  | 4326 | 4387 |
| LbrM34_V2.5330 | <i>L. braziliensis</i> | 59  | 5081 | 5139 |
| LbrM34_V2.5340 | <i>L. braziliensis</i> | 55  | 90   | 144  |
| LbrM34_V2.5340 | <i>L. braziliensis</i> | 78  | 147  | 224  |
| LbrM34_V2.5340 | <i>L. braziliensis</i> | 172 | 436  | 607  |
| LbrM34_V2.5340 | <i>L. braziliensis</i> | 112 | 786  | 897  |
| LbrM34_V2.5340 | <i>L. braziliensis</i> | 43  | 1111 | 1153 |
| LbrM34_V2.5340 | <i>L. braziliensis</i> | 58  | 1688 | 1745 |
| LbrM34_V2.5350 | <i>L. braziliensis</i> | 927 | 36   | 962  |
| LbrM35_V2.0020 | <i>L. braziliensis</i> | 110 | 19   | 128  |
| LbrM35_V2.0030 | <i>L. braziliensis</i> | 177 | 200  | 376  |
| LbrM35_V2.0030 | <i>L. braziliensis</i> | 111 | 556  | 666  |
| LbrM35_V2.0030 | <i>L. braziliensis</i> | 58  | 1457 | 1514 |
| LbrM35_V2.0040 | <i>L. braziliensis</i> | 60  | 1    | 60   |
| LbrM35_V2.0060 | <i>L. braziliensis</i> | 60  | 1    | 60   |
| LbrM35_V2.0070 | <i>L. braziliensis</i> | 78  | 1    | 78   |
| LbrM35_V2.0090 | <i>L. braziliensis</i> | 55  | 1    | 55   |
| LbrM35_V2.0090 | <i>L. braziliensis</i> | 124 | 428  | 551  |
| LbrM35_V2.0090 | <i>L. braziliensis</i> | 124 | 428  | 551  |
| LbrM35_V2.0110 | <i>L. braziliensis</i> | 61  | 1    | 61   |
| LbrM35_V2.0110 | <i>L. braziliensis</i> | 182 | 98   | 279  |
| LbrM35_V2.0120 | <i>L. braziliensis</i> | 54  | 88   | 141  |
| LbrM35_V2.0130 | <i>L. braziliensis</i> | 68  | 71   | 138  |
| LbrM35_V2.0180 | <i>L. braziliensis</i> | 41  | 1    | 41   |
| LbrM35_V2.0180 | <i>L. braziliensis</i> | 78  | 148  | 225  |
| LbrM35_V2.0180 | <i>L. braziliensis</i> | 78  | 148  | 225  |
| LbrM35_V2.0200 | <i>L. braziliensis</i> | 138 | 101  | 238  |
| LbrM35_V2.0210 | <i>L. braziliensis</i> | 57  | 585  | 641  |
| LbrM35_V2.0230 | <i>L. braziliensis</i> | 47  | 239  | 285  |
| LbrM35_V2.0240 | <i>L. braziliensis</i> | 41  | 115  | 155  |
| LbrM35_V2.0320 | <i>L. braziliensis</i> | 80  | 1    | 80   |
| LbrM35_V2.0320 | <i>L. braziliensis</i> | 55  | 118  | 172  |
| LbrM35_V2.0320 | <i>L. braziliensis</i> | 55  | 118  | 172  |
| LbrM35_V2.0330 | <i>L. braziliensis</i> | 48  | 311  | 358  |

|                |                        |     |     |     |
|----------------|------------------------|-----|-----|-----|
| LbrM35_V2.0340 | <i>L. braziliensis</i> | 56  | 1   | 56  |
| LbrM35_V2.0350 | <i>L. braziliensis</i> | 114 | 80  | 193 |
| LbrM35_V2.0350 | <i>L. braziliensis</i> | 88  | 589 | 676 |
| LbrM35_V2.0350 | <i>L. braziliensis</i> | 88  | 589 | 676 |
| LbrM35_V2.0360 | <i>L. braziliensis</i> | 56  | 146 | 201 |
| LbrM35_V2.0370 | <i>L. braziliensis</i> | 44  | 192 | 235 |
| LbrM35_V2.0420 | <i>L. braziliensis</i> | 52  | 77  | 128 |
| LbrM35_V2.0440 | <i>L. braziliensis</i> | 198 | 1   | 198 |
| LbrM35_V2.0450 | <i>L. braziliensis</i> | 42  | 72  | 113 |
| LbrM35_V2.0460 | <i>L. braziliensis</i> | 62  | 1   | 62  |
| LbrM35_V2.0460 | <i>L. braziliensis</i> | 56  | 326 | 381 |
| LbrM35_V2.0460 | <i>L. braziliensis</i> | 56  | 326 | 381 |
| LbrM35_V2.0470 | <i>L. braziliensis</i> | 146 | 1   | 146 |
| LbrM35_V2.0480 | <i>L. braziliensis</i> | 128 | 1   | 128 |
| LbrM35_V2.0480 | <i>L. braziliensis</i> | 92  | 300 | 391 |
| LbrM35_V2.0490 | <i>L. braziliensis</i> | 61  | 46  | 106 |
| LbrM35_V2.0490 | <i>L. braziliensis</i> | 66  | 147 | 212 |
| LbrM35_V2.0490 | <i>L. braziliensis</i> | 119 | 250 | 368 |
| LbrM35_V2.0500 | <i>L. braziliensis</i> | 46  | 1   | 46  |
| LbrM35_V2.0510 | <i>L. braziliensis</i> | 51  | 1   | 51  |
| LbrM35_V2.0520 | <i>L. braziliensis</i> | 57  | 52  | 108 |
| LbrM35_V2.0540 | <i>L. braziliensis</i> | 78  | 1   | 78  |
| LbrM35_V2.0540 | <i>L. braziliensis</i> | 414 | 125 | 538 |
| LbrM35_V2.0550 | <i>L. braziliensis</i> | 40  | 174 | 213 |
| LbrM35_V2.0550 | <i>L. braziliensis</i> | 42  | 576 | 617 |
| LbrM35_V2.0550 | <i>L. braziliensis</i> | 42  | 576 | 617 |
| LbrM35_V2.0560 | <i>L. braziliensis</i> | 68  | 171 | 238 |
| LbrM35_V2.0570 | <i>L. braziliensis</i> | 46  | 14  | 59  |
| LbrM35_V2.0580 | <i>L. braziliensis</i> | 159 | 40  | 198 |
| LbrM35_V2.0580 | <i>L. braziliensis</i> | 139 | 203 | 341 |
| LbrM35_V2.0590 | <i>L. braziliensis</i> | 43  | 338 | 380 |
| LbrM35_V2.0590 | <i>L. braziliensis</i> | 100 | 411 | 510 |
| LbrM35_V2.0590 | <i>L. braziliensis</i> | 100 | 411 | 510 |
| LbrM35_V2.0600 | <i>L. braziliensis</i> | 48  | 1   | 48  |
| LbrM35_V2.0610 | <i>L. braziliensis</i> | 80  | 27  | 106 |
| LbrM35_V2.0610 | <i>L. braziliensis</i> | 49  | 293 | 341 |
| LbrM35_V2.0610 | <i>L. braziliensis</i> | 49  | 293 | 341 |
| LbrM35_V2.0630 | <i>L. braziliensis</i> | 49  | 93  | 141 |
| LbrM35_V2.0650 | <i>L. braziliensis</i> | 203 | 73  | 275 |
| LbrM35_V2.0670 | <i>L. braziliensis</i> | 83  | 1   | 83  |
| LbrM35_V2.0670 | <i>L. braziliensis</i> | 135 | 121 | 255 |
| LbrM35_V2.0680 | <i>L. braziliensis</i> | 51  | 413 | 463 |
| LbrM35_V2.0680 | <i>L. braziliensis</i> | 42  | 705 | 746 |
| LbrM35_V2.0680 | <i>L. braziliensis</i> | 42  | 705 | 746 |
| LbrM35_V2.0720 | <i>L. braziliensis</i> | 56  | 67  | 122 |
| LbrM35_V2.0730 | <i>L. braziliensis</i> | 65  | 1   | 65  |
| LbrM35_V2.0730 | <i>L. braziliensis</i> | 50  | 111 | 160 |

|                |                        |     |      |      |
|----------------|------------------------|-----|------|------|
| LbrM35_V2.0730 | <i>L. braziliensis</i> | 50  | 111  | 160  |
| LbrM35_V2.0780 | <i>L. braziliensis</i> | 54  | 44   | 97   |
| LbrM35_V2.0800 | <i>L. braziliensis</i> | 55  | 1    | 55   |
| LbrM35_V2.0800 | <i>L. braziliensis</i> | 63  | 102  | 164  |
| LbrM35_V2.0800 | <i>L. braziliensis</i> | 417 | 196  | 612  |
| LbrM35_V2.0810 | <i>L. braziliensis</i> | 76  | 11   | 86   |
| LbrM35_V2.0820 | <i>L. braziliensis</i> | 56  | 17   | 72   |
| LbrM35_V2.0820 | <i>L. braziliensis</i> | 52  | 178  | 229  |
| LbrM35_V2.0830 | <i>L. braziliensis</i> | 74  | 127  | 200  |
| LbrM35_V2.0840 | <i>L. braziliensis</i> | 141 | 320  | 460  |
| LbrM35_V2.0850 | <i>L. braziliensis</i> | 77  | 1    | 77   |
| LbrM35_V2.0850 | <i>L. braziliensis</i> | 202 | 295  | 496  |
| LbrM35_V2.0860 | <i>L. braziliensis</i> | 195 | 1    | 195  |
| LbrM35_V2.0860 | <i>L. braziliensis</i> | 59  | 209  | 267  |
| LbrM35_V2.0860 | <i>L. braziliensis</i> | 43  | 372  | 414  |
| LbrM35_V2.0860 | <i>L. braziliensis</i> | 44  | 485  | 528  |
| LbrM35_V2.0870 | <i>L. braziliensis</i> | 102 | 116  | 217  |
| LbrM35_V2.0870 | <i>L. braziliensis</i> | 263 | 297  | 559  |
| LbrM35_V2.0870 | <i>L. braziliensis</i> | 41  | 940  | 980  |
| LbrM35_V2.0870 | <i>L. braziliensis</i> | 59  | 1122 | 1180 |
| LbrM35_V2.0870 | <i>L. braziliensis</i> | 47  | 1247 | 1293 |
| LbrM35_V2.0880 | <i>L. braziliensis</i> | 174 | 1    | 174  |
| LbrM35_V2.0880 | <i>L. braziliensis</i> | 44  | 342  | 385  |
| LbrM35_V2.0880 | <i>L. braziliensis</i> | 81  | 703  | 783  |
| LbrM35_V2.0890 | <i>L. braziliensis</i> | 125 | 1    | 125  |
| LbrM35_V2.0890 | <i>L. braziliensis</i> | 193 | 154  | 346  |
| LbrM35_V2.0900 | <i>L. braziliensis</i> | 173 | 1    | 173  |
| LbrM35_V2.0900 | <i>L. braziliensis</i> | 205 | 221  | 425  |
| LbrM35_V2.0900 | <i>L. braziliensis</i> | 41  | 726  | 766  |
| LbrM35_V2.0910 | <i>L. braziliensis</i> | 124 | 8    | 131  |
| LbrM35_V2.0910 | <i>L. braziliensis</i> | 193 | 190  | 382  |
| LbrM35_V2.0910 | <i>L. braziliensis</i> | 167 | 393  | 559  |
| LbrM35_V2.0920 | <i>L. braziliensis</i> | 45  | 430  | 474  |
| LbrM35_V2.0940 | <i>L. braziliensis</i> | 40  | 46   | 85   |
| LbrM35_V2.0950 | <i>L. braziliensis</i> | 45  | 410  | 454  |
| LbrM35_V2.0950 | <i>L. braziliensis</i> | 158 | 519  | 676  |
| LbrM35_V2.0950 | <i>L. braziliensis</i> | 110 | 802  | 911  |
| LbrM35_V2.0950 | <i>L. braziliensis</i> | 57  | 1355 | 1411 |
| LbrM35_V2.0950 | <i>L. braziliensis</i> | 55  | 1750 | 1804 |
| LbrM35_V2.0960 | <i>L. braziliensis</i> | 57  | 1    | 57   |
| LbrM35_V2.0960 | <i>L. braziliensis</i> | 45  | 68   | 112  |
| LbrM35_V2.0960 | <i>L. braziliensis</i> | 101 | 391  | 491  |
| LbrM35_V2.0960 | <i>L. braziliensis</i> | 61  | 510  | 570  |
| LbrM35_V2.0960 | <i>L. braziliensis</i> | 132 | 658  | 789  |
| LbrM35_V2.0970 | <i>L. braziliensis</i> | 276 | 27   | 302  |
| LbrM35_V2.0970 | <i>L. braziliensis</i> | 216 | 542  | 757  |
| LbrM35_V2.0970 | <i>L. braziliensis</i> | 41  | 820  | 860  |

|                |                        |     |      |      |
|----------------|------------------------|-----|------|------|
| LbrM35_V2.0980 | <i>L. braziliensis</i> | 80  | 321  | 400  |
| LbrM35_V2.0980 | <i>L. braziliensis</i> | 107 | 420  | 526  |
| LbrM35_V2.0990 | <i>L. braziliensis</i> | 121 | 74   | 194  |
| LbrM35_V2.0990 | <i>L. braziliensis</i> | 41  | 238  | 278  |
| LbrM35_V2.0990 | <i>L. braziliensis</i> | 45  | 834  | 878  |
| LbrM35_V2.1020 | <i>L. braziliensis</i> | 105 | 408  | 512  |
| LbrM35_V2.1020 | <i>L. braziliensis</i> | 95  | 557  | 651  |
| LbrM35_V2.1030 | <i>L. braziliensis</i> | 143 | 54   | 196  |
| LbrM35_V2.1030 | <i>L. braziliensis</i> | 124 | 1101 | 1224 |
| LbrM35_V2.1030 | <i>L. braziliensis</i> | 53  | 1226 | 1278 |
| LbrM35_V2.1040 | <i>L. braziliensis</i> | 47  | 85   | 131  |
| LbrM35_V2.1040 | <i>L. braziliensis</i> | 42  | 427  | 468  |
| LbrM35_V2.1040 | <i>L. braziliensis</i> | 42  | 508  | 549  |
| LbrM35_V2.1050 | <i>L. braziliensis</i> | 65  | 89   | 153  |
| LbrM35_V2.1060 | <i>L. braziliensis</i> | 65  | 89   | 153  |
| LbrM35_V2.1070 | <i>L. braziliensis</i> | 54  | 515  | 568  |
| LbrM35_V2.1070 | <i>L. braziliensis</i> | 59  | 832  | 890  |
| LbrM35_V2.1070 | <i>L. braziliensis</i> | 117 | 2712 | 2828 |
| LbrM35_V2.1070 | <i>L. braziliensis</i> | 64  | 2951 | 3014 |
| LbrM35_V2.1080 | <i>L. braziliensis</i> | 67  | 351  | 417  |
| LbrM35_V2.1080 | <i>L. braziliensis</i> | 67  | 521  | 587  |
| LbrM35_V2.1080 | <i>L. braziliensis</i> | 51  | 665  | 715  |
| LbrM35_V2.1090 | <i>L. braziliensis</i> | 76  | 1    | 76   |
| LbrM35_V2.1100 | <i>L. braziliensis</i> | 77  | 94   | 170  |
| LbrM35_V2.1110 | <i>L. braziliensis</i> | 77  | 94   | 170  |
| LbrM35_V2.1120 | <i>L. braziliensis</i> | 40  | 635  | 674  |
| LbrM35_V2.1120 | <i>L. braziliensis</i> | 40  | 1102 | 1141 |
| LbrM35_V2.1120 | <i>L. braziliensis</i> | 40  | 1102 | 1141 |
| LbrM35_V2.1130 | <i>L. braziliensis</i> | 50  | 296  | 345  |
| LbrM35_V2.1130 | <i>L. braziliensis</i> | 44  | 368  | 411  |
| LbrM35_V2.1130 | <i>L. braziliensis</i> | 50  | 571  | 620  |
| LbrM35_V2.1130 | <i>L. braziliensis</i> | 47  | 762  | 808  |
| LbrM35_V2.1130 | <i>L. braziliensis</i> | 51  | 1145 | 1195 |
| LbrM35_V2.1160 | <i>L. braziliensis</i> | 215 | 1    | 215  |
| LbrM35_V2.1160 | <i>L. braziliensis</i> | 107 | 303  | 409  |
| LbrM35_V2.1160 | <i>L. braziliensis</i> | 41  | 529  | 569  |
| LbrM35_V2.1160 | <i>L. braziliensis</i> | 52  | 808  | 859  |
| LbrM35_V2.1160 | <i>L. braziliensis</i> | 55  | 1110 | 1164 |
| LbrM35_V2.1170 | <i>L. braziliensis</i> | 106 | 181  | 286  |
| LbrM35_V2.1180 | <i>L. braziliensis</i> | 49  | 22   | 70   |
| LbrM35_V2.1180 | <i>L. braziliensis</i> | 44  | 87   | 130  |
| LbrM35_V2.1180 | <i>L. braziliensis</i> | 44  | 87   | 130  |
| LbrM35_V2.1190 | <i>L. braziliensis</i> | 121 | 139  | 259  |
| LbrM35_V2.1190 | <i>L. braziliensis</i> | 72  | 394  | 465  |
| LbrM35_V2.1190 | <i>L. braziliensis</i> | 96  | 568  | 663  |
| LbrM35_V2.1190 | <i>L. braziliensis</i> | 122 | 709  | 830  |
| LbrM35_V2.1190 | <i>L. braziliensis</i> | 51  | 886  | 936  |

|                |                        |     |     |      |
|----------------|------------------------|-----|-----|------|
| LbrM35_V2.1200 | <i>L. braziliensis</i> | 42  | 83  | 124  |
| LbrM35_V2.1230 | <i>L. braziliensis</i> | 42  | 83  | 124  |
| LbrM35_V2.1240 | <i>L. braziliensis</i> | 102 | 250 | 351  |
| LbrM35_V2.1250 | <i>L. braziliensis</i> | 63  | 62  | 124  |
| LbrM35_V2.1280 | <i>L. braziliensis</i> | 247 | 1   | 247  |
| LbrM35_V2.1280 | <i>L. braziliensis</i> | 58  | 281 | 338  |
| LbrM35_V2.1280 | <i>L. braziliensis</i> | 58  | 494 | 551  |
| LbrM35_V2.1280 | <i>L. braziliensis</i> | 97  | 577 | 673  |
| LbrM35_V2.1280 | <i>L. braziliensis</i> | 46  | 716 | 761  |
| LbrM35_V2.1300 | <i>L. braziliensis</i> | 47  | 66  | 112  |
| LbrM35_V2.1340 | <i>L. braziliensis</i> | 74  | 1   | 74   |
| LbrM35_V2.1350 | <i>L. braziliensis</i> | 67  | 1   | 67   |
| LbrM35_V2.1350 | <i>L. braziliensis</i> | 54  | 107 | 160  |
| LbrM35_V2.1350 | <i>L. braziliensis</i> | 131 | 186 | 316  |
| LbrM35_V2.1370 | <i>L. braziliensis</i> | 72  | 174 | 245  |
| LbrM35_V2.1370 | <i>L. braziliensis</i> | 42  | 394 | 435  |
| LbrM35_V2.1400 | <i>L. braziliensis</i> | 54  | 1   | 54   |
| LbrM35_V2.1400 | <i>L. braziliensis</i> | 53  | 84  | 136  |
| LbrM35_V2.1400 | <i>L. braziliensis</i> | 53  | 84  | 136  |
| LbrM35_V2.1410 | <i>L. braziliensis</i> | 70  | 40  | 109  |
| LbrM35_V2.1410 | <i>L. braziliensis</i> | 84  | 332 | 415  |
| LbrM35_V2.1410 | <i>L. braziliensis</i> | 84  | 332 | 415  |
| LbrM35_V2.1420 | <i>L. braziliensis</i> | 156 | 102 | 257  |
| LbrM35_V2.1430 | <i>L. braziliensis</i> | 182 | 1   | 182  |
| LbrM35_V2.1430 | <i>L. braziliensis</i> | 101 | 280 | 380  |
| LbrM35_V2.1440 | <i>L. braziliensis</i> | 65  | 94  | 158  |
| LbrM35_V2.1460 | <i>L. braziliensis</i> | 40  | 17  | 56   |
| LbrM35_V2.1460 | <i>L. braziliensis</i> | 77  | 132 | 208  |
| LbrM35_V2.1460 | <i>L. braziliensis</i> | 40  | 228 | 267  |
| LbrM35_V2.1490 | <i>L. braziliensis</i> | 48  | 265 | 312  |
| LbrM35_V2.1490 | <i>L. braziliensis</i> | 40  | 746 | 785  |
| LbrM35_V2.1490 | <i>L. braziliensis</i> | 40  | 746 | 785  |
| LbrM35_V2.1500 | <i>L. braziliensis</i> | 59  | 1   | 59   |
| LbrM35_V2.1520 | <i>L. braziliensis</i> | 68  | 93  | 160  |
| LbrM35_V2.1520 | <i>L. braziliensis</i> | 83  | 266 | 348  |
| LbrM35_V2.1520 | <i>L. braziliensis</i> | 52  | 367 | 418  |
| LbrM35_V2.1520 | <i>L. braziliensis</i> | 83  | 455 | 537  |
| LbrM35_V2.1520 | <i>L. braziliensis</i> | 176 | 560 | 735  |
| LbrM35_V2.1520 | <i>L. braziliensis</i> | 252 | 923 | 1174 |
| LbrM35_V2.1540 | <i>L. braziliensis</i> | 97  | 145 | 241  |
| LbrM35_V2.1540 | <i>L. braziliensis</i> | 191 | 260 | 450  |
| LbrM35_V2.1550 | <i>L. braziliensis</i> | 56  | 77  | 132  |
| LbrM35_V2.1550 | <i>L. braziliensis</i> | 47  | 141 | 187  |
| LbrM35_V2.1550 | <i>L. braziliensis</i> | 99  | 389 | 487  |
| LbrM35_V2.1560 | <i>L. braziliensis</i> | 74  | 189 | 262  |
| LbrM35_V2.1560 | <i>L. braziliensis</i> | 70  | 360 | 429  |
| LbrM35_V2.1560 | <i>L. braziliensis</i> | 70  | 360 | 429  |

|                |                        |     |      |      |
|----------------|------------------------|-----|------|------|
| LbrM35_V2.1570 | <i>L. braziliensis</i> | 75  | 51   | 125  |
| LbrM35_V2.1580 | <i>L. braziliensis</i> | 52  | 143  | 194  |
| LbrM35_V2.1580 | <i>L. braziliensis</i> | 49  | 852  | 900  |
| LbrM35_V2.1580 | <i>L. braziliensis</i> | 63  | 936  | 998  |
| LbrM35_V2.1580 | <i>L. braziliensis</i> | 51  | 1826 | 1876 |
| LbrM35_V2.1580 | <i>L. braziliensis</i> | 54  | 1899 | 1952 |
| LbrM35_V2.1580 | <i>L. braziliensis</i> | 72  | 2054 | 2125 |
| LbrM35_V2.1580 | <i>L. braziliensis</i> | 41  | 2238 | 2278 |
| LbrM35_V2.1580 | <i>L. braziliensis</i> | 90  | 2337 | 2426 |
| LbrM35_V2.1580 | <i>L. braziliensis</i> | 57  | 3255 | 3311 |
| LbrM35_V2.1580 | <i>L. braziliensis</i> | 59  | 3769 | 3827 |
| LbrM35_V2.1580 | <i>L. braziliensis</i> | 61  | 4058 | 4118 |
| LbrM35_V2.1580 | <i>L. braziliensis</i> | 58  | 4126 | 4183 |
| LbrM35_V2.1580 | <i>L. braziliensis</i> | 51  | 4533 | 4583 |
| LbrM35_V2.1580 | <i>L. braziliensis</i> | 41  | 4950 | 4990 |
| LbrM35_V2.1580 | <i>L. braziliensis</i> | 84  | 5209 | 5292 |
| LbrM35_V2.1600 | <i>L. braziliensis</i> | 320 | 1    | 320  |
| LbrM35_V2.1600 | <i>L. braziliensis</i> | 217 | 344  | 560  |
| LbrM35_V2.1600 | <i>L. braziliensis</i> | 58  | 569  | 626  |
| LbrM35_V2.1610 | <i>L. braziliensis</i> | 79  | 27   | 105  |
| LbrM35_V2.1610 | <i>L. braziliensis</i> | 108 | 443  | 550  |
| LbrM35_V2.1610 | <i>L. braziliensis</i> | 116 | 625  | 740  |
| LbrM35_V2.1610 | <i>L. braziliensis</i> | 84  | 806  | 889  |
| LbrM35_V2.1610 | <i>L. braziliensis</i> | 112 | 892  | 1003 |
| LbrM35_V2.1620 | <i>L. braziliensis</i> | 94  | 1    | 94   |
| LbrM35_V2.1620 | <i>L. braziliensis</i> | 68  | 106  | 173  |
| LbrM35_V2.1620 | <i>L. braziliensis</i> | 71  | 297  | 367  |
| LbrM35_V2.1630 | <i>L. braziliensis</i> | 456 | 1    | 456  |
| LbrM35_V2.1630 | <i>L. braziliensis</i> | 636 | 534  | 1169 |
| LbrM35_V2.1630 | <i>L. braziliensis</i> | 93  | 1210 | 1302 |
| LbrM35_V2.1640 | <i>L. braziliensis</i> | 125 | 223  | 347  |
| LbrM35_V2.1640 | <i>L. braziliensis</i> | 41  | 541  | 581  |
| LbrM35_V2.1640 | <i>L. braziliensis</i> | 62  | 737  | 798  |
| LbrM35_V2.1640 | <i>L. braziliensis</i> | 100 | 803  | 902  |
| LbrM35_V2.1650 | <i>L. braziliensis</i> | 46  | 59   | 104  |
| LbrM35_V2.1670 | <i>L. braziliensis</i> | 51  | 324  | 374  |
| LbrM35_V2.1680 | <i>L. braziliensis</i> | 167 | 60   | 226  |
| LbrM35_V2.1680 | <i>L. braziliensis</i> | 125 | 253  | 377  |
| LbrM35_V2.1680 | <i>L. braziliensis</i> | 81  | 382  | 462  |
| LbrM35_V2.1680 | <i>L. braziliensis</i> | 44  | 610  | 653  |
| LbrM35_V2.1690 | <i>L. braziliensis</i> | 60  | 1    | 60   |
| LbrM35_V2.1690 | <i>L. braziliensis</i> | 65  | 114  | 178  |
| LbrM35_V2.1690 | <i>L. braziliensis</i> | 82  | 194  | 275  |
| LbrM35_V2.1690 | <i>L. braziliensis</i> | 50  | 513  | 562  |
| LbrM35_V2.1690 | <i>L. braziliensis</i> | 84  | 607  | 690  |
| LbrM35_V2.1690 | <i>L. braziliensis</i> | 121 | 729  | 849  |
| LbrM35_V2.1700 | <i>L. braziliensis</i> | 105 | 275  | 379  |

|                |                        |     |      |      |
|----------------|------------------------|-----|------|------|
| LbrM35_V2.1710 | <i>L. braziliensis</i> | 330 | 40   | 369  |
| LbrM35_V2.1710 | <i>L. braziliensis</i> | 41  | 434  | 474  |
| LbrM35_V2.1720 | <i>L. braziliensis</i> | 130 | 1    | 130  |
| LbrM35_V2.1720 | <i>L. braziliensis</i> | 72  | 579  | 650  |
| LbrM35_V2.1720 | <i>L. braziliensis</i> | 275 | 695  | 969  |
| LbrM35_V2.1720 | <i>L. braziliensis</i> | 41  | 1283 | 1323 |
| LbrM35_V2.1720 | <i>L. braziliensis</i> | 68  | 1473 | 1540 |
| LbrM35_V2.1730 | <i>L. braziliensis</i> | 94  | 1    | 94   |
| LbrM35_V2.1730 | <i>L. braziliensis</i> | 146 | 1065 | 1210 |
| LbrM35_V2.1740 | <i>L. braziliensis</i> | 123 | 1    | 123  |
| LbrM35_V2.1760 | <i>L. braziliensis</i> | 115 | 1    | 115  |
| LbrM35_V2.1770 | <i>L. braziliensis</i> | 115 | 1    | 115  |
| LbrM35_V2.1780 | <i>L. braziliensis</i> | 71  | 1624 | 1694 |
| LbrM35_V2.1790 | <i>L. braziliensis</i> | 135 | 1    | 135  |
| LbrM35_V2.1810 | <i>L. braziliensis</i> | 184 | 1    | 184  |
| LbrM35_V2.1810 | <i>L. braziliensis</i> | 284 | 209  | 492  |
| LbrM35_V2.1820 | <i>L. braziliensis</i> | 94  | 1    | 94   |
| LbrM35_V2.1820 | <i>L. braziliensis</i> | 69  | 106  | 174  |
| LbrM35_V2.1820 | <i>L. braziliensis</i> | 74  | 294  | 367  |
| LbrM35_V2.1830 | <i>L. braziliensis</i> | 276 | 1    | 276  |
| LbrM35_V2.1850 | <i>L. braziliensis</i> | 311 | 18   | 328  |
| LbrM35_V2.1850 | <i>L. braziliensis</i> | 68  | 594  | 661  |
| LbrM35_V2.1860 | <i>L. braziliensis</i> | 40  | 145  | 184  |
| LbrM35_V2.1860 | <i>L. braziliensis</i> | 48  | 363  | 410  |
| LbrM35_V2.1860 | <i>L. braziliensis</i> | 48  | 363  | 410  |
| LbrM35_V2.1870 | <i>L. braziliensis</i> | 67  | 244  | 310  |
| LbrM35_V2.1870 | <i>L. braziliensis</i> | 53  | 342  | 394  |
| LbrM35_V2.1870 | <i>L. braziliensis</i> | 79  | 521  | 599  |
| LbrM35_V2.1870 | <i>L. braziliensis</i> | 94  | 642  | 735  |
| LbrM35_V2.1880 | <i>L. braziliensis</i> | 57  | 132  | 188  |
| LbrM35_V2.1890 | <i>L. braziliensis</i> | 510 | 13   | 522  |
| LbrM35_V2.1900 | <i>L. braziliensis</i> | 74  | 1    | 74   |
| LbrM35_V2.1910 | <i>L. braziliensis</i> | 42  | 12   | 53   |
| LbrM35_V2.1910 | <i>L. braziliensis</i> | 52  | 73   | 124  |
| LbrM35_V2.1910 | <i>L. braziliensis</i> | 41  | 152  | 192  |
| LbrM35_V2.1910 | <i>L. braziliensis</i> | 45  | 418  | 462  |
| LbrM35_V2.1910 | <i>L. braziliensis</i> | 76  | 546  | 621  |
| LbrM35_V2.1910 | <i>L. braziliensis</i> | 106 | 884  | 989  |
| LbrM35_V2.1910 | <i>L. braziliensis</i> | 59  | 1065 | 1123 |
| LbrM35_V2.1910 | <i>L. braziliensis</i> | 53  | 1453 | 1505 |
| LbrM35_V2.1910 | <i>L. braziliensis</i> | 77  | 2282 | 2358 |
| LbrM35_V2.1910 | <i>L. braziliensis</i> | 50  | 2587 | 2636 |
| LbrM35_V2.1910 | <i>L. braziliensis</i> | 74  | 2860 | 2933 |
| LbrM35_V2.1910 | <i>L. braziliensis</i> | 51  | 3060 | 3110 |
| LbrM35_V2.1910 | <i>L. braziliensis</i> | 50  | 3219 | 3268 |
| LbrM35_V2.1910 | <i>L. braziliensis</i> | 145 | 3320 | 3464 |
| LbrM35_V2.1910 | <i>L. braziliensis</i> | 108 | 3965 | 4072 |



|                |                        |     |      |      |
|----------------|------------------------|-----|------|------|
| LbrM35_V2.1920 | <i>L. braziliensis</i> | 50  | 54   | 103  |
| LbrM35_V2.1920 | <i>L. braziliensis</i> | 80  | 246  | 325  |
| LbrM35_V2.1920 | <i>L. braziliensis</i> | 161 | 820  | 980  |
| LbrM35_V2.1930 | <i>L. braziliensis</i> | 48  | 1    | 48   |
| LbrM35_V2.1930 | <i>L. braziliensis</i> | 55  | 76   | 130  |
| LbrM35_V2.1930 | <i>L. braziliensis</i> | 87  | 290  | 376  |
| LbrM35_V2.1930 | <i>L. braziliensis</i> | 65  | 630  | 694  |
| LbrM35_V2.1930 | <i>L. braziliensis</i> | 44  | 1196 | 1239 |
| LbrM35_V2.1970 | <i>L. braziliensis</i> | 121 | 108  | 228  |
| LbrM35_V2.1970 | <i>L. braziliensis</i> | 46  | 354  | 399  |
| LbrM35_V2.1970 | <i>L. braziliensis</i> | 117 | 639  | 755  |
| LbrM35_V2.1980 | <i>L. braziliensis</i> | 196 | 704  | 899  |
| LbrM35_V2.1990 | <i>L. braziliensis</i> | 63  | 1    | 63   |
| LbrM35_V2.1990 | <i>L. braziliensis</i> | 174 | 133  | 306  |
| LbrM35_V2.1990 | <i>L. braziliensis</i> | 174 | 133  | 306  |
| LbrM35_V2.2000 | <i>L. braziliensis</i> | 43  | 1    | 43   |
| LbrM35_V2.2000 | <i>L. braziliensis</i> | 60  | 335  | 394  |
| LbrM35_V2.2010 | <i>L. braziliensis</i> | 124 | 186  | 309  |
| LbrM35_V2.2010 | <i>L. braziliensis</i> | 215 | 366  | 580  |
| LbrM35_V2.2010 | <i>L. braziliensis</i> | 296 | 599  | 894  |
| LbrM35_V2.2020 | <i>L. braziliensis</i> | 325 | 1    | 325  |
| LbrM35_V2.2020 | <i>L. braziliensis</i> | 186 | 329  | 514  |
| LbrM35_V2.2020 | <i>L. braziliensis</i> | 78  | 530  | 607  |
| LbrM35_V2.2030 | <i>L. braziliensis</i> | 152 | 1    | 152  |
| LbrM35_V2.2030 | <i>L. braziliensis</i> | 50  | 605  | 654  |
| LbrM35_V2.2040 | <i>L. braziliensis</i> | 52  | 1    | 52   |
| LbrM35_V2.2040 | <i>L. braziliensis</i> | 105 | 423  | 527  |
| LbrM35_V2.2050 | <i>L. braziliensis</i> | 48  | 358  | 405  |
| LbrM35_V2.2060 | <i>L. braziliensis</i> | 134 | 666  | 799  |
| LbrM35_V2.2070 | <i>L. braziliensis</i> | 40  | 199  | 238  |
| LbrM35_V2.2070 | <i>L. braziliensis</i> | 54  | 378  | 431  |
| LbrM35_V2.2090 | <i>L. braziliensis</i> | 71  | 1    | 71   |
| LbrM35_V2.2090 | <i>L. braziliensis</i> | 47  | 921  | 967  |
| LbrM35_V2.2090 | <i>L. braziliensis</i> | 320 | 993  | 1312 |
| LbrM35_V2.2090 | <i>L. braziliensis</i> | 217 | 1359 | 1575 |
| LbrM35_V2.2090 | <i>L. braziliensis</i> | 65  | 1597 | 1661 |
| LbrM35_V2.2100 | <i>L. braziliensis</i> | 258 | 1    | 258  |
| LbrM35_V2.2100 | <i>L. braziliensis</i> | 78  | 300  | 377  |
| LbrM35_V2.2100 | <i>L. braziliensis</i> | 43  | 397  | 439  |
| LbrM35_V2.2110 | <i>L. braziliensis</i> | 150 | 66   | 215  |
| LbrM35_V2.2110 | <i>L. braziliensis</i> | 170 | 250  | 419  |
| LbrM35_V2.2120 | <i>L. braziliensis</i> | 71  | 1    | 71   |
| LbrM35_V2.2120 | <i>L. braziliensis</i> | 41  | 74   | 114  |
| LbrM35_V2.2120 | <i>L. braziliensis</i> | 42  | 453  | 494  |
| LbrM35_V2.2140 | <i>L. braziliensis</i> | 115 | 64   | 178  |
| LbrM35_V2.2140 | <i>L. braziliensis</i> | 50  | 228  | 277  |
| LbrM35_V2.2150 | <i>L. braziliensis</i> | 79  | 252  | 330  |

|                |                        |     |      |      |
|----------------|------------------------|-----|------|------|
| LbrM35_V2.2160 | <i>L. braziliensis</i> | 45  | 547  | 591  |
| LbrM35_V2.2220 | <i>L. braziliensis</i> | 53  | 600  | 652  |
| LbrM35_V2.2220 | <i>L. braziliensis</i> | 78  | 1033 | 1110 |
| LbrM35_V2.2220 | <i>L. braziliensis</i> | 73  | 1149 | 1221 |
| LbrM35_V2.2230 | <i>L. braziliensis</i> | 64  | 1    | 64   |
| LbrM35_V2.2230 | <i>L. braziliensis</i> | 112 | 98   | 209  |
| LbrM35_V2.2230 | <i>L. braziliensis</i> | 112 | 98   | 209  |
| LbrM35_V2.2260 | <i>L. braziliensis</i> | 107 | 1    | 107  |
| LbrM35_V2.2260 | <i>L. braziliensis</i> | 58  | 152  | 209  |
| LbrM35_V2.2260 | <i>L. braziliensis</i> | 57  | 236  | 292  |
| LbrM35_V2.2260 | <i>L. braziliensis</i> | 49  | 304  | 352  |
| LbrM35_V2.2260 | <i>L. braziliensis</i> | 117 | 463  | 579  |
| LbrM35_V2.2260 | <i>L. braziliensis</i> | 62  | 591  | 652  |
| LbrM35_V2.2280 | <i>L. braziliensis</i> | 131 | 1    | 131  |
| LbrM35_V2.2280 | <i>L. braziliensis</i> | 41  | 245  | 285  |
| LbrM35_V2.2280 | <i>L. braziliensis</i> | 48  | 376  | 423  |
| LbrM35_V2.2280 | <i>L. braziliensis</i> | 64  | 493  | 556  |
| LbrM35_V2.2280 | <i>L. braziliensis</i> | 116 | 582  | 697  |
| LbrM35_V2.2290 | <i>L. braziliensis</i> | 47  | 1    | 47   |
| LbrM35_V2.2290 | <i>L. braziliensis</i> | 55  | 238  | 292  |
| LbrM35_V2.2290 | <i>L. braziliensis</i> | 108 | 398  | 505  |
| LbrM35_V2.2300 | <i>L. braziliensis</i> | 105 | 160  | 264  |
| LbrM35_V2.2310 | <i>L. braziliensis</i> | 102 | 1    | 102  |
| LbrM35_V2.2310 | <i>L. braziliensis</i> | 267 | 169  | 435  |
| LbrM35_V2.2310 | <i>L. braziliensis</i> | 196 | 470  | 665  |
| LbrM35_V2.2310 | <i>L. braziliensis</i> | 463 | 737  | 1199 |
| LbrM35_V2.2320 | <i>L. braziliensis</i> | 47  | 213  | 259  |
| LbrM35_V2.2320 | <i>L. braziliensis</i> | 213 | 384  | 596  |
| LbrM35_V2.2320 | <i>L. braziliensis</i> | 81  | 603  | 683  |
| LbrM35_V2.2320 | <i>L. braziliensis</i> | 45  | 732  | 776  |
| LbrM35_V2.2330 | <i>L. braziliensis</i> | 70  | 69   | 138  |
| LbrM35_V2.2340 | <i>L. braziliensis</i> | 54  | 69   | 122  |
| LbrM35_V2.2340 | <i>L. braziliensis</i> | 48  | 225  | 272  |
| LbrM35_V2.2340 | <i>L. braziliensis</i> | 48  | 225  | 272  |
| LbrM35_V2.2350 | <i>L. braziliensis</i> | 101 | 38   | 138  |
| LbrM35_V2.2350 | <i>L. braziliensis</i> | 253 | 140  | 392  |
| LbrM35_V2.2350 | <i>L. braziliensis</i> | 367 | 429  | 795  |
| LbrM35_V2.2360 | <i>L. braziliensis</i> | 265 | 1    | 265  |
| LbrM35_V2.2360 | <i>L. braziliensis</i> | 307 | 316  | 622  |
| LbrM35_V2.2360 | <i>L. braziliensis</i> | 317 | 643  | 959  |
| LbrM35_V2.2360 | <i>L. braziliensis</i> | 87  | 987  | 1073 |
| LbrM35_V2.2360 | <i>L. braziliensis</i> | 136 | 1115 | 1250 |
| LbrM35_V2.2360 | <i>L. braziliensis</i> | 70  | 1334 | 1403 |
| LbrM35_V2.2360 | <i>L. braziliensis</i> | 64  | 1406 | 1469 |
| LbrM35_V2.2370 | <i>L. braziliensis</i> | 52  | 1    | 52   |
| LbrM35_V2.2370 | <i>L. braziliensis</i> | 84  | 488  | 571  |
| LbrM35_V2.2410 | <i>L. braziliensis</i> | 80  | 478  | 557  |

|                |                        |     |      |      |
|----------------|------------------------|-----|------|------|
| LbrM35_V2.2420 | <i>L. braziliensis</i> | 104 | 1    | 104  |
| LbrM35_V2.2420 | <i>L. braziliensis</i> | 103 | 123  | 225  |
| LbrM35_V2.2420 | <i>L. braziliensis</i> | 103 | 123  | 225  |
| LbrM35_V2.2430 | <i>L. braziliensis</i> | 129 | 1    | 129  |
| LbrM35_V2.2430 | <i>L. braziliensis</i> | 95  | 138  | 232  |
| LbrM35_V2.2430 | <i>L. braziliensis</i> | 59  | 276  | 334  |
| LbrM35_V2.2430 | <i>L. braziliensis</i> | 237 | 355  | 591  |
| LbrM35_V2.2440 | <i>L. braziliensis</i> | 62  | 38   | 99   |
| LbrM35_V2.2440 | <i>L. braziliensis</i> | 172 | 450  | 621  |
| LbrM35_V2.2460 | <i>L. braziliensis</i> | 59  | 161  | 219  |
| LbrM35_V2.2460 | <i>L. braziliensis</i> | 42  | 248  | 289  |
| LbrM35_V2.2460 | <i>L. braziliensis</i> | 42  | 248  | 289  |
| LbrM35_V2.2480 | <i>L. braziliensis</i> | 59  | 1    | 59   |
| LbrM35_V2.2480 | <i>L. braziliensis</i> | 63  | 228  | 290  |
| LbrM35_V2.2480 | <i>L. braziliensis</i> | 104 | 1106 | 1209 |
| LbrM35_V2.2480 | <i>L. braziliensis</i> | 123 | 1217 | 1339 |
| LbrM35_V2.2480 | <i>L. braziliensis</i> | 123 | 1431 | 1553 |
| LbrM35_V2.2480 | <i>L. braziliensis</i> | 47  | 1592 | 1638 |
| LbrM35_V2.2480 | <i>L. braziliensis</i> | 135 | 1666 | 1800 |
| LbrM35_V2.2480 | <i>L. braziliensis</i> | 68  | 1992 | 2059 |
| LbrM35_V2.2480 | <i>L. braziliensis</i> | 308 | 2233 | 2540 |
| LbrM35_V2.2500 | <i>L. braziliensis</i> | 62  | 177  | 238  |
| LbrM35_V2.2510 | <i>L. braziliensis</i> | 54  | 200  | 253  |
| LbrM35_V2.2510 | <i>L. braziliensis</i> | 41  | 345  | 385  |
| LbrM35_V2.2510 | <i>L. braziliensis</i> | 41  | 345  | 385  |
| LbrM35_V2.2520 | <i>L. braziliensis</i> | 43  | 1    | 43   |
| LbrM35_V2.2520 | <i>L. braziliensis</i> | 68  | 425  | 492  |
| LbrM35_V2.2520 | <i>L. braziliensis</i> | 68  | 425  | 492  |
| LbrM35_V2.2530 | <i>L. braziliensis</i> | 169 | 315  | 483  |
| LbrM35_V2.2540 | <i>L. braziliensis</i> | 93  | 233  | 325  |
| LbrM35_V2.2560 | <i>L. braziliensis</i> | 45  | 1    | 45   |
| LbrM35_V2.2560 | <i>L. braziliensis</i> | 42  | 98   | 139  |
| LbrM35_V2.2560 | <i>L. braziliensis</i> | 42  | 98   | 139  |
| LbrM35_V2.2570 | <i>L. braziliensis</i> | 61  | 285  | 345  |
| LbrM35_V2.2580 | <i>L. braziliensis</i> | 91  | 1    | 91   |
| LbrM35_V2.2590 | <i>L. braziliensis</i> | 83  | 1    | 83   |
| LbrM35_V2.2590 | <i>L. braziliensis</i> | 57  | 147  | 203  |
| LbrM35_V2.2590 | <i>L. braziliensis</i> | 42  | 222  | 263  |
| LbrM35_V2.2590 | <i>L. braziliensis</i> | 80  | 340  | 419  |
| LbrM35_V2.2590 | <i>L. braziliensis</i> | 72  | 445  | 516  |
| LbrM35_V2.2590 | <i>L. braziliensis</i> | 85  | 722  | 806  |
| LbrM35_V2.2600 | <i>L. braziliensis</i> | 47  | 1    | 47   |
| LbrM35_V2.2600 | <i>L. braziliensis</i> | 52  | 314  | 365  |
| LbrM35_V2.2600 | <i>L. braziliensis</i> | 52  | 314  | 365  |
| LbrM35_V2.2620 | <i>L. braziliensis</i> | 62  | 119  | 180  |
| LbrM35_V2.2620 | <i>L. braziliensis</i> | 103 | 278  | 380  |
| LbrM35_V2.2620 | <i>L. braziliensis</i> | 117 | 416  | 532  |

|                |                        |     |      |      |
|----------------|------------------------|-----|------|------|
| LbrM35_V2.2620 | <i>L. braziliensis</i> | 270 | 734  | 1003 |
| LbrM35_V2.2620 | <i>L. braziliensis</i> | 46  | 1135 | 1180 |
| LbrM35_V2.2620 | <i>L. braziliensis</i> | 43  | 1350 | 1392 |
| LbrM35_V2.2620 | <i>L. braziliensis</i> | 62  | 1469 | 1530 |
| LbrM35_V2.2620 | <i>L. braziliensis</i> | 100 | 1532 | 1631 |
| LbrM35_V2.2620 | <i>L. braziliensis</i> | 73  | 1759 | 1831 |
| LbrM35_V2.2640 | <i>L. braziliensis</i> | 90  | 30   | 119  |
| LbrM35_V2.2650 | <i>L. braziliensis</i> | 201 | 17   | 217  |
| LbrM35_V2.2660 | <i>L. braziliensis</i> | 66  | 216  | 281  |
| LbrM35_V2.2670 | <i>L. braziliensis</i> | 61  | 267  | 327  |
| LbrM35_V2.2690 | <i>L. braziliensis</i> | 50  | 88   | 137  |
| LbrM35_V2.2690 | <i>L. braziliensis</i> | 119 | 156  | 274  |
| LbrM35_V2.2700 | <i>L. braziliensis</i> | 209 | 1    | 209  |
| LbrM35_V2.2710 | <i>L. braziliensis</i> | 55  | 307  | 361  |
| LbrM35_V2.2710 | <i>L. braziliensis</i> | 59  | 419  | 477  |
| LbrM35_V2.2710 | <i>L. braziliensis</i> | 66  | 574  | 639  |
| LbrM35_V2.2720 | <i>L. braziliensis</i> | 102 | 1    | 102  |
| LbrM35_V2.2730 | <i>L. braziliensis</i> | 142 | 107  | 248  |
| LbrM35_V2.2730 | <i>L. braziliensis</i> | 41  | 310  | 350  |
| LbrM35_V2.2740 | <i>L. braziliensis</i> | 139 | 1    | 139  |
| LbrM35_V2.2740 | <i>L. braziliensis</i> | 43  | 441  | 483  |
| LbrM35_V2.2740 | <i>L. braziliensis</i> | 41  | 677  | 717  |
| LbrM35_V2.2770 | <i>L. braziliensis</i> | 54  | 528  | 581  |
| LbrM35_V2.2780 | <i>L. braziliensis</i> | 65  | 270  | 334  |
| LbrM35_V2.2790 | <i>L. braziliensis</i> | 44  | 253  | 296  |
| LbrM35_V2.2790 | <i>L. braziliensis</i> | 57  | 302  | 358  |
| LbrM35_V2.2790 | <i>L. braziliensis</i> | 73  | 367  | 439  |
| LbrM35_V2.2790 | <i>L. braziliensis</i> | 48  | 728  | 775  |
| LbrM35_V2.2810 | <i>L. braziliensis</i> | 70  | 132  | 201  |
| LbrM35_V2.2810 | <i>L. braziliensis</i> | 81  | 345  | 425  |
| LbrM35_V2.2810 | <i>L. braziliensis</i> | 67  | 536  | 602  |
| LbrM35_V2.2820 | <i>L. braziliensis</i> | 50  | 1    | 50   |
| LbrM35_V2.2830 | <i>L. braziliensis</i> | 203 | 1    | 203  |
| LbrM35_V2.2830 | <i>L. braziliensis</i> | 61  | 580  | 640  |
| LbrM35_V2.2830 | <i>L. braziliensis</i> | 58  | 715  | 772  |
| LbrM35_V2.2830 | <i>L. braziliensis</i> | 50  | 777  | 826  |
| LbrM35_V2.2830 | <i>L. braziliensis</i> | 52  | 1134 | 1185 |
| LbrM35_V2.2830 | <i>L. braziliensis</i> | 85  | 1467 | 1551 |
| LbrM35_V2.2840 | <i>L. braziliensis</i> | 90  | 1    | 90   |
| LbrM35_V2.2840 | <i>L. braziliensis</i> | 165 | 106  | 270  |
| LbrM35_V2.2840 | <i>L. braziliensis</i> | 104 | 303  | 406  |
| LbrM35_V2.2840 | <i>L. braziliensis</i> | 88  | 463  | 550  |
| LbrM35_V2.2840 | <i>L. braziliensis</i> | 53  | 628  | 680  |
| LbrM35_V2.2840 | <i>L. braziliensis</i> | 49  | 724  | 772  |
| LbrM35_V2.2840 | <i>L. braziliensis</i> | 47  | 780  | 826  |
| LbrM35_V2.2840 | <i>L. braziliensis</i> | 111 | 843  | 953  |
| LbrM35_V2.2840 | <i>L. braziliensis</i> | 122 | 999  | 1120 |

|                |                        |     |      |      |
|----------------|------------------------|-----|------|------|
| LbrM35_V2.2840 | <i>L. braziliensis</i> | 75  | 1165 | 1239 |
| LbrM35_V2.2840 | <i>L. braziliensis</i> | 48  | 1474 | 1521 |
| LbrM35_V2.2840 | <i>L. braziliensis</i> | 46  | 1697 | 1742 |
| LbrM35_V2.2840 | <i>L. braziliensis</i> | 49  | 1981 | 2029 |
| LbrM35_V2.2840 | <i>L. braziliensis</i> | 184 | 2129 | 2312 |
| LbrM35_V2.2840 | <i>L. braziliensis</i> | 176 | 2341 | 2516 |
| LbrM35_V2.2840 | <i>L. braziliensis</i> | 137 | 2526 | 2662 |
| LbrM35_V2.2840 | <i>L. braziliensis</i> | 43  | 2698 | 2740 |
| LbrM35_V2.2840 | <i>L. braziliensis</i> | 58  | 2796 | 2853 |
| LbrM35_V2.2840 | <i>L. braziliensis</i> | 48  | 2906 | 2953 |
| LbrM35_V2.2840 | <i>L. braziliensis</i> | 49  | 3221 | 3269 |
| LbrM35_V2.2860 | <i>L. braziliensis</i> | 52  | 147  | 198  |
| LbrM35_V2.2870 | <i>L. braziliensis</i> | 133 | 100  | 232  |
| LbrM35_V2.2880 | <i>L. braziliensis</i> | 42  | 22   | 63   |
| LbrM35_V2.2900 | <i>L. braziliensis</i> | 51  | 483  | 533  |
| LbrM35_V2.2910 | <i>L. braziliensis</i> | 139 | 1    | 139  |
| LbrM35_V2.2910 | <i>L. braziliensis</i> | 270 | 384  | 653  |
| LbrM35_V2.2910 | <i>L. braziliensis</i> | 68  | 1375 | 1442 |
| LbrM35_V2.2920 | <i>L. braziliensis</i> | 56  | 44   | 99   |
| LbrM35_V2.2920 | <i>L. braziliensis</i> | 47  | 152  | 198  |
| LbrM35_V2.2920 | <i>L. braziliensis</i> | 55  | 204  | 258  |
| LbrM35_V2.2920 | <i>L. braziliensis</i> | 54  | 286  | 339  |
| LbrM35_V2.2930 | <i>L. braziliensis</i> | 85  | 27   | 111  |
| LbrM35_V2.2960 | <i>L. braziliensis</i> | 44  | 977  | 1020 |
| LbrM35_V2.2980 | <i>L. braziliensis</i> | 56  | 311  | 366  |
| LbrM35_V2.2990 | <i>L. braziliensis</i> | 613 | 1    | 613  |
| LbrM35_V2.3010 | <i>L. braziliensis</i> | 52  | 489  | 540  |
| LbrM35_V2.3010 | <i>L. braziliensis</i> | 56  | 1335 | 1390 |
| LbrM35_V2.3010 | <i>L. braziliensis</i> | 44  | 2077 | 2120 |
| LbrM35_V2.3010 | <i>L. braziliensis</i> | 60  | 2531 | 2590 |
| LbrM35_V2.3020 | <i>L. braziliensis</i> | 52  | 26   | 77   |
| LbrM35_V2.3020 | <i>L. braziliensis</i> | 66  | 108  | 173  |
| LbrM35_V2.3020 | <i>L. braziliensis</i> | 57  | 195  | 251  |
| LbrM35_V2.3020 | <i>L. braziliensis</i> | 157 | 256  | 412  |
| LbrM35_V2.3020 | <i>L. braziliensis</i> | 120 | 496  | 615  |
| LbrM35_V2.3030 | <i>L. braziliensis</i> | 66  | 93   | 158  |
| LbrM35_V2.3030 | <i>L. braziliensis</i> | 89  | 337  | 425  |
| LbrM35_V2.3030 | <i>L. braziliensis</i> | 64  | 522  | 585  |
| LbrM35_V2.3040 | <i>L. braziliensis</i> | 89  | 309  | 397  |
| LbrM35_V2.3040 | <i>L. braziliensis</i> | 162 | 437  | 598  |
| LbrM35_V2.3050 | <i>L. braziliensis</i> | 45  | 57   | 101  |
| LbrM35_V2.3050 | <i>L. braziliensis</i> | 252 | 148  | 399  |
| LbrM35_V2.3060 | <i>L. braziliensis</i> | 72  | 42   | 113  |
| LbrM35_V2.3060 | <i>L. braziliensis</i> | 49  | 123  | 171  |
| LbrM35_V2.3090 | <i>L. braziliensis</i> | 45  | 93   | 137  |
| LbrM35_V2.3100 | <i>L. braziliensis</i> | 56  | 1511 | 1566 |
| LbrM35_V2.3110 | <i>L. braziliensis</i> | 88  | 307  | 394  |

|                |                        |     |      |      |
|----------------|------------------------|-----|------|------|
| LbrM35_V2.3120 | <i>L. braziliensis</i> | 50  | 386  | 435  |
| LbrM35_V2.3120 | <i>L. braziliensis</i> | 70  | 499  | 568  |
| LbrM35_V2.3120 | <i>L. braziliensis</i> | 43  | 616  | 658  |
| LbrM35_V2.3120 | <i>L. braziliensis</i> | 127 | 719  | 845  |
| LbrM35_V2.3130 | <i>L. braziliensis</i> | 77  | 1    | 77   |
| LbrM35_V2.3130 | <i>L. braziliensis</i> | 49  | 299  | 347  |
| LbrM35_V2.3150 | <i>L. braziliensis</i> | 191 | 362  | 552  |
| LbrM35_V2.3160 | <i>L. braziliensis</i> | 60  | 1568 | 1627 |
| LbrM35_V2.3160 | <i>L. braziliensis</i> | 44  | 2240 | 2283 |
| LbrM35_V2.3160 | <i>L. braziliensis</i> | 48  | 2607 | 2654 |
| LbrM35_V2.3160 | <i>L. braziliensis</i> | 110 | 2689 | 2798 |
| LbrM35_V2.3160 | <i>L. braziliensis</i> | 42  | 3761 | 3802 |
| LbrM35_V2.3200 | <i>L. braziliensis</i> | 113 | 124  | 236  |
| LbrM35_V2.3220 | <i>L. braziliensis</i> | 55  | 228  | 282  |
| LbrM35_V2.3220 | <i>L. braziliensis</i> | 109 | 650  | 758  |
| LbrM35_V2.3220 | <i>L. braziliensis</i> | 109 | 650  | 758  |
| LbrM35_V2.3260 | <i>L. braziliensis</i> | 41  | 120  | 160  |
| LbrM35_V2.3310 | <i>L. braziliensis</i> | 274 | 245  | 518  |
| LbrM35_V2.3310 | <i>L. braziliensis</i> | 42  | 770  | 811  |
| LbrM35_V2.3320 | <i>L. braziliensis</i> | 72  | 1    | 72   |
| LbrM35_V2.3330 | <i>L. braziliensis</i> | 47  | 198  | 244  |
| LbrM35_V2.3360 | <i>L. braziliensis</i> | 51  | 93   | 143  |
| LbrM35_V2.3370 | <i>L. braziliensis</i> | 293 | 130  | 422  |
| LbrM35_V2.3380 | <i>L. braziliensis</i> | 64  | 1    | 64   |
| LbrM35_V2.3380 | <i>L. braziliensis</i> | 67  | 81   | 147  |
| LbrM35_V2.3380 | <i>L. braziliensis</i> | 67  | 81   | 147  |
| LbrM35_V2.3400 | <i>L. braziliensis</i> | 45  | 82   | 126  |
| LbrM35_V2.3400 | <i>L. braziliensis</i> | 43  | 450  | 492  |
| LbrM35_V2.3400 | <i>L. braziliensis</i> | 50  | 1184 | 1233 |
| LbrM35_V2.3410 | <i>L. braziliensis</i> | 48  | 1    | 48   |
| LbrM35_V2.3410 | <i>L. braziliensis</i> | 56  | 50   | 105  |
| LbrM35_V2.3410 | <i>L. braziliensis</i> | 71  | 146  | 216  |
| LbrM35_V2.3410 | <i>L. braziliensis</i> | 73  | 253  | 325  |
| LbrM35_V2.3420 | <i>L. braziliensis</i> | 67  | 852  | 918  |
| LbrM35_V2.3440 | <i>L. braziliensis</i> | 469 | 21   | 489  |
| LbrM35_V2.3460 | <i>L. braziliensis</i> | 40  | 268  | 307  |
| LbrM35_V2.3470 | <i>L. braziliensis</i> | 106 | 486  | 591  |
| LbrM35_V2.3480 | <i>L. braziliensis</i> | 78  | 132  | 209  |
| LbrM35_V2.3490 | <i>L. braziliensis</i> | 64  | 95   | 158  |
| LbrM35_V2.3510 | <i>L. braziliensis</i> | 40  | 1    | 40   |
| LbrM35_V2.3510 | <i>L. braziliensis</i> | 62  | 114  | 175  |
| LbrM35_V2.3510 | <i>L. braziliensis</i> | 49  | 200  | 248  |
| LbrM35_V2.3510 | <i>L. braziliensis</i> | 65  | 1105 | 1169 |
| LbrM35_V2.3530 | <i>L. braziliensis</i> | 59  | 1    | 59   |
| LbrM35_V2.3530 | <i>L. braziliensis</i> | 235 | 61   | 295  |
| LbrM35_V2.3530 | <i>L. braziliensis</i> | 293 | 440  | 732  |
| LbrM35_V2.3560 | <i>L. braziliensis</i> | 69  | 187  | 255  |

|                |                        |     |      |      |
|----------------|------------------------|-----|------|------|
| LbrM35_V2.3560 | <i>L. braziliensis</i> | 59  | 263  | 321  |
| LbrM35_V2.3560 | <i>L. braziliensis</i> | 59  | 263  | 321  |
| LbrM35_V2.3570 | <i>L. braziliensis</i> | 51  | 318  | 368  |
| LbrM35_V2.3570 | <i>L. braziliensis</i> | 41  | 507  | 547  |
| LbrM35_V2.3570 | <i>L. braziliensis</i> | 59  | 1206 | 1264 |
| LbrM35_V2.3580 | <i>L. braziliensis</i> | 41  | 47   | 87   |
| LbrM35_V2.3660 | <i>L. braziliensis</i> | 48  | 1    | 48   |
| LbrM35_V2.3660 | <i>L. braziliensis</i> | 74  | 295  | 368  |
| LbrM35_V2.3660 | <i>L. braziliensis</i> | 63  | 408  | 470  |
| LbrM35_V2.3660 | <i>L. braziliensis</i> | 64  | 633  | 696  |
| LbrM35_V2.3670 | <i>L. braziliensis</i> | 209 | 9    | 217  |
| LbrM35_V2.3680 | <i>L. braziliensis</i> | 41  | 138  | 178  |
| LbrM35_V2.3710 | <i>L. braziliensis</i> | 162 | 49   | 210  |
| LbrM35_V2.3720 | <i>L. braziliensis</i> | 116 | 223  | 338  |
| LbrM35_V2.3730 | <i>L. braziliensis</i> | 145 | 1    | 145  |
| LbrM35_V2.3730 | <i>L. braziliensis</i> | 210 | 180  | 389  |
| LbrM35_V2.3730 | <i>L. braziliensis</i> | 47  | 448  | 494  |
| LbrM35_V2.3740 | <i>L. braziliensis</i> | 42  | 68   | 109  |
| LbrM35_V2.3740 | <i>L. braziliensis</i> | 54  | 130  | 183  |
| LbrM35_V2.3740 | <i>L. braziliensis</i> | 54  | 130  | 183  |
| LbrM35_V2.3750 | <i>L. braziliensis</i> | 66  | 1    | 66   |
| LbrM35_V2.3770 | <i>L. braziliensis</i> | 58  | 45   | 102  |
| LbrM35_V2.3770 | <i>L. braziliensis</i> | 46  | 186  | 231  |
| LbrM35_V2.3780 | <i>L. braziliensis</i> | 330 | 221  | 550  |
| LbrM35_V2.3780 | <i>L. braziliensis</i> | 433 | 570  | 1002 |
| LbrM35_V2.3790 | <i>L. braziliensis</i> | 40  | 1    | 40   |
| LbrM35_V2.3800 | <i>L. braziliensis</i> | 167 | 102  | 268  |
| LbrM35_V2.3830 | <i>L. braziliensis</i> | 106 | 23   | 128  |
| LbrM35_V2.3830 | <i>L. braziliensis</i> | 119 | 287  | 405  |
| LbrM35_V2.3860 | <i>L. braziliensis</i> | 117 | 117  | 233  |
| LbrM35_V2.3870 | <i>L. braziliensis</i> | 43  | 57   | 99   |
| LbrM35_V2.3900 | <i>L. braziliensis</i> | 64  | 219  | 282  |
| LbrM35_V2.3920 | <i>L. braziliensis</i> | 40  | 652  | 691  |
| LbrM35_V2.3960 | <i>L. braziliensis</i> | 58  | 20   | 77   |
| LbrM35_V2.3960 | <i>L. braziliensis</i> | 123 | 122  | 244  |
| LbrM35_V2.3960 | <i>L. braziliensis</i> | 54  | 532  | 585  |
| LbrM35_V2.3980 | <i>L. braziliensis</i> | 51  | 1    | 51   |
| LbrM35_V2.3980 | <i>L. braziliensis</i> | 70  | 100  | 169  |
| LbrM35_V2.4000 | <i>L. braziliensis</i> | 49  | 1    | 49   |
| LbrM35_V2.4010 | <i>L. braziliensis</i> | 41  | 1    | 41   |
| LbrM35_V2.4030 | <i>L. braziliensis</i> | 166 | 145  | 310  |
| LbrM35_V2.4030 | <i>L. braziliensis</i> | 88  | 333  | 420  |
| LbrM35_V2.4030 | <i>L. braziliensis</i> | 165 | 488  | 652  |
| LbrM35_V2.4030 | <i>L. braziliensis</i> | 268 | 689  | 956  |
| LbrM35_V2.4050 | <i>L. braziliensis</i> | 55  | 76   | 130  |
| LbrM35_V2.4060 | <i>L. braziliensis</i> | 73  | 185  | 257  |
| LbrM35_V2.4080 | <i>L. braziliensis</i> | 225 | 1    | 225  |

|                |                        |     |      |      |
|----------------|------------------------|-----|------|------|
| LbrM35_V2.4100 | <i>L. braziliensis</i> | 99  | 61   | 159  |
| LbrM35_V2.4100 | <i>L. braziliensis</i> | 40  | 172  | 211  |
| LbrM35_V2.4100 | <i>L. braziliensis</i> | 75  | 415  | 489  |
| LbrM35_V2.4100 | <i>L. braziliensis</i> | 85  | 530  | 614  |
| LbrM35_V2.4120 | <i>L. braziliensis</i> | 46  | 1    | 46   |
| LbrM35_V2.4120 | <i>L. braziliensis</i> | 83  | 91   | 173  |
| LbrM35_V2.4130 | <i>L. braziliensis</i> | 42  | 176  | 217  |
| LbrM35_V2.4170 | <i>L. braziliensis</i> | 42  | 115  | 156  |
| LbrM35_V2.4170 | <i>L. braziliensis</i> | 83  | 229  | 311  |
| LbrM35_V2.4170 | <i>L. braziliensis</i> | 100 | 756  | 855  |
| LbrM35_V2.4170 | <i>L. braziliensis</i> | 63  | 857  | 919  |
| LbrM35_V2.4170 | <i>L. braziliensis</i> | 122 | 1331 | 1452 |
| LbrM35_V2.4180 | <i>L. braziliensis</i> | 75  | 73   | 147  |
| LbrM35_V2.4180 | <i>L. braziliensis</i> | 93  | 340  | 432  |
| LbrM35_V2.4180 | <i>L. braziliensis</i> | 55  | 543  | 597  |
| LbrM35_V2.4180 | <i>L. braziliensis</i> | 108 | 677  | 784  |
| LbrM35_V2.4190 | <i>L. braziliensis</i> | 214 | 1    | 214  |
| LbrM35_V2.4190 | <i>L. braziliensis</i> | 108 | 231  | 338  |
| LbrM35_V2.4200 | <i>L. braziliensis</i> | 113 | 1    | 113  |
| LbrM35_V2.4200 | <i>L. braziliensis</i> | 59  | 146  | 204  |
| LbrM35_V2.4200 | <i>L. braziliensis</i> | 292 | 313  | 604  |
| LbrM35_V2.4200 | <i>L. braziliensis</i> | 105 | 660  | 764  |
| LbrM35_V2.4200 | <i>L. braziliensis</i> | 116 | 901  | 1016 |
| LbrM35_V2.4210 | <i>L. braziliensis</i> | 140 | 1    | 140  |
| LbrM35_V2.4210 | <i>L. braziliensis</i> | 58  | 250  | 307  |
| LbrM35_V2.4210 | <i>L. braziliensis</i> | 45  | 423  | 467  |
| LbrM35_V2.4210 | <i>L. braziliensis</i> | 78  | 789  | 866  |
| LbrM35_V2.4210 | <i>L. braziliensis</i> | 79  | 927  | 1005 |
| LbrM35_V2.4210 | <i>L. braziliensis</i> | 419 | 1093 | 1511 |
| LbrM35_V2.4220 | <i>L. braziliensis</i> | 41  | 1    | 41   |
| LbrM35_V2.4220 | <i>L. braziliensis</i> | 74  | 96   | 169  |
| LbrM35_V2.4250 | <i>L. braziliensis</i> | 84  | 168  | 251  |
| LbrM35_V2.4250 | <i>L. braziliensis</i> | 107 | 317  | 423  |
| LbrM35_V2.4260 | <i>L. braziliensis</i> | 137 | 49   | 185  |
| LbrM35_V2.4270 | <i>L. braziliensis</i> | 593 | 1    | 593  |
| LbrM35_V2.4270 | <i>L. braziliensis</i> | 92  | 633  | 724  |
| LbrM35_V2.4270 | <i>L. braziliensis</i> | 85  | 1042 | 1126 |
| LbrM35_V2.4270 | <i>L. braziliensis</i> | 104 | 1348 | 1451 |
| LbrM35_V2.4270 | <i>L. braziliensis</i> | 47  | 1489 | 1535 |
| LbrM35_V2.4280 | <i>L. braziliensis</i> | 100 | 1    | 100  |
| LbrM35_V2.4280 | <i>L. braziliensis</i> | 130 | 304  | 433  |
| LbrM35_V2.4300 | <i>L. braziliensis</i> | 53  | 8    | 60   |
| LbrM35_V2.4310 | <i>L. braziliensis</i> | 47  | 142  | 188  |
| LbrM35_V2.4320 | <i>L. braziliensis</i> | 111 | 154  | 264  |
| LbrM35_V2.4320 | <i>L. braziliensis</i> | 182 | 268  | 449  |
| LbrM35_V2.4320 | <i>L. braziliensis</i> | 48  | 482  | 529  |
| LbrM35_V2.4330 | <i>L. braziliensis</i> | 66  | 189  | 254  |



|                |                        |     |      |      |
|----------------|------------------------|-----|------|------|
| LbrM35_V2.4330 | <i>L. braziliensis</i> | 87  | 304  | 390  |
| LbrM35_V2.4340 | <i>L. braziliensis</i> | 52  | 49   | 100  |
| LbrM35_V2.4340 | <i>L. braziliensis</i> | 97  | 230  | 326  |
| LbrM35_V2.4340 | <i>L. braziliensis</i> | 47  | 868  | 914  |
| LbrM35_V2.4340 | <i>L. braziliensis</i> | 99  | 1251 | 1349 |
| LbrM35_V2.4340 | <i>L. braziliensis</i> | 45  | 1358 | 1402 |
| LbrM35_V2.4350 | <i>L. braziliensis</i> | 54  | 1    | 54   |
| LbrM35_V2.4350 | <i>L. braziliensis</i> | 56  | 77   | 132  |
| LbrM35_V2.4350 | <i>L. braziliensis</i> | 60  | 689  | 748  |
| LbrM35_V2.4350 | <i>L. braziliensis</i> | 50  | 866  | 915  |
| LbrM35_V2.4360 | <i>L. braziliensis</i> | 44  | 1    | 44   |
| LbrM35_V2.4400 | <i>L. braziliensis</i> | 77  | 1    | 77   |
| LbrM35_V2.4400 | <i>L. braziliensis</i> | 47  | 120  | 166  |
| LbrM35_V2.4400 | <i>L. braziliensis</i> | 78  | 203  | 280  |
| LbrM35_V2.4400 | <i>L. braziliensis</i> | 121 | 302  | 422  |
| LbrM35_V2.4400 | <i>L. braziliensis</i> | 105 | 432  | 536  |
| LbrM35_V2.4400 | <i>L. braziliensis</i> | 122 | 543  | 664  |
| LbrM35_V2.4410 | <i>L. braziliensis</i> | 59  | 1    | 59   |
| LbrM35_V2.4410 | <i>L. braziliensis</i> | 96  | 66   | 161  |
| LbrM35_V2.4410 | <i>L. braziliensis</i> | 166 | 165  | 330  |
| LbrM35_V2.4440 | <i>L. braziliensis</i> | 121 | 230  | 350  |
| LbrM35_V2.4450 | <i>L. braziliensis</i> | 139 | 240  | 378  |
| LbrM35_V2.4450 | <i>L. braziliensis</i> | 132 | 393  | 524  |
| LbrM35_V2.4450 | <i>L. braziliensis</i> | 46  | 718  | 763  |
| LbrM35_V2.4450 | <i>L. braziliensis</i> | 47  | 786  | 832  |
| LbrM35_V2.4460 | <i>L. braziliensis</i> | 59  | 698  | 756  |
| LbrM35_V2.4470 | <i>L. braziliensis</i> | 62  | 1    | 62   |
| LbrM35_V2.4470 | <i>L. braziliensis</i> | 283 | 181  | 463  |
| LbrM35_V2.4490 | <i>L. braziliensis</i> | 137 | 75   | 211  |
| LbrM35_V2.4490 | <i>L. braziliensis</i> | 94  | 305  | 398  |
| LbrM35_V2.4490 | <i>L. braziliensis</i> | 54  | 614  | 667  |
| LbrM35_V2.4500 | <i>L. braziliensis</i> | 181 | 194  | 374  |
| LbrM35_V2.4500 | <i>L. braziliensis</i> | 63  | 494  | 556  |
| LbrM35_V2.4500 | <i>L. braziliensis</i> | 122 | 590  | 711  |
| LbrM35_V2.4500 | <i>L. braziliensis</i> | 71  | 743  | 813  |
| LbrM35_V2.4510 | <i>L. braziliensis</i> | 78  | 1    | 78   |
| LbrM35_V2.4510 | <i>L. braziliensis</i> | 82  | 176  | 257  |
| LbrM35_V2.4510 | <i>L. braziliensis</i> | 83  | 263  | 345  |
| LbrM35_V2.4520 | <i>L. braziliensis</i> | 58  | 288  | 345  |
| LbrM35_V2.4520 | <i>L. braziliensis</i> | 76  | 1231 | 1306 |
| LbrM35_V2.4520 | <i>L. braziliensis</i> | 45  | 1510 | 1554 |
| LbrM35_V2.4530 | <i>L. braziliensis</i> | 92  | 354  | 445  |
| LbrM35_V2.4530 | <i>L. braziliensis</i> | 45  | 488  | 532  |
| LbrM35_V2.4540 | <i>L. braziliensis</i> | 93  | 900  | 992  |
| LbrM35_V2.4540 | <i>L. braziliensis</i> | 65  | 1170 | 1234 |
| LbrM35_V2.4560 | <i>L. braziliensis</i> | 64  | 179  | 242  |
| LbrM35_V2.4560 | <i>L. braziliensis</i> | 138 | 276  | 413  |

|                |                        |     |      |      |
|----------------|------------------------|-----|------|------|
| LbrM35_V2.4560 | <i>L. braziliensis</i> | 201 | 936  | 1136 |
| LbrM35_V2.4560 | <i>L. braziliensis</i> | 71  | 1663 | 1733 |
| LbrM35_V2.4570 | <i>L. braziliensis</i> | 186 | 1    | 186  |
| LbrM35_V2.4570 | <i>L. braziliensis</i> | 48  | 971  | 1018 |
| LbrM35_V2.4570 | <i>L. braziliensis</i> | 42  | 1268 | 1309 |
| LbrM35_V2.4570 | <i>L. braziliensis</i> | 105 | 1528 | 1632 |
| LbrM35_V2.4580 | <i>L. braziliensis</i> | 548 | 1    | 548  |
| LbrM35_V2.4590 | <i>L. braziliensis</i> | 54  | 1    | 54   |
| LbrM35_V2.4590 | <i>L. braziliensis</i> | 80  | 67   | 146  |
| LbrM35_V2.4590 | <i>L. braziliensis</i> | 143 | 379  | 521  |
| LbrM35_V2.4590 | <i>L. braziliensis</i> | 100 | 535  | 634  |
| LbrM35_V2.4590 | <i>L. braziliensis</i> | 256 | 636  | 891  |
| LbrM35_V2.4600 | <i>L. braziliensis</i> | 42  | 35   | 76   |
| LbrM35_V2.4610 | <i>L. braziliensis</i> | 49  | 1    | 49   |
| LbrM35_V2.4610 | <i>L. braziliensis</i> | 87  | 441  | 527  |
| LbrM35_V2.4610 | <i>L. braziliensis</i> | 180 | 678  | 857  |
| LbrM35_V2.4610 | <i>L. braziliensis</i> | 52  | 985  | 1036 |
| LbrM35_V2.4610 | <i>L. braziliensis</i> | 175 | 1129 | 1303 |
| LbrM35_V2.4610 | <i>L. braziliensis</i> | 49  | 1412 | 1460 |
| LbrM35_V2.4610 | <i>L. braziliensis</i> | 81  | 1742 | 1822 |
| LbrM35_V2.4610 | <i>L. braziliensis</i> | 43  | 1911 | 1953 |
| LbrM35_V2.4620 | <i>L. braziliensis</i> | 50  | 18   | 67   |
| LbrM35_V2.4620 | <i>L. braziliensis</i> | 77  | 162  | 238  |
| LbrM35_V2.4620 | <i>L. braziliensis</i> | 75  | 350  | 424  |
| LbrM35_V2.4630 | <i>L. braziliensis</i> | 54  | 60   | 113  |
| LbrM35_V2.4630 | <i>L. braziliensis</i> | 61  | 358  | 418  |
| LbrM35_V2.4630 | <i>L. braziliensis</i> | 44  | 612  | 655  |
| LbrM35_V2.4640 | <i>L. braziliensis</i> | 111 | 56   | 166  |
| LbrM35_V2.4640 | <i>L. braziliensis</i> | 53  | 216  | 268  |
| LbrM35_V2.4640 | <i>L. braziliensis</i> | 165 | 453  | 617  |
| LbrM35_V2.4640 | <i>L. braziliensis</i> | 45  | 930  | 974  |
| LbrM35_V2.4650 | <i>L. braziliensis</i> | 185 | 16   | 200  |
| LbrM35_V2.4710 | <i>L. braziliensis</i> | 119 | 157  | 275  |
| LbrM35_V2.4720 | <i>L. braziliensis</i> | 117 | 132  | 248  |
| LbrM35_V2.4720 | <i>L. braziliensis</i> | 137 | 511  | 647  |
| LbrM35_V2.4730 | <i>L. braziliensis</i> | 47  | 325  | 371  |
| LbrM35_V2.4750 | <i>L. braziliensis</i> | 53  | 146  | 198  |
| LbrM35_V2.4760 | <i>L. braziliensis</i> | 76  | 550  | 625  |
| LbrM35_V2.4770 | <i>L. braziliensis</i> | 99  | 1    | 99   |
| LbrM35_V2.4790 | <i>L. braziliensis</i> | 66  | 1    | 66   |
| LbrM35_V2.4800 | <i>L. braziliensis</i> | 58  | 230  | 287  |
| LbrM35_V2.4810 | <i>L. braziliensis</i> | 83  | 1    | 83   |
| LbrM35_V2.4810 | <i>L. braziliensis</i> | 240 | 103  | 342  |
| LbrM35_V2.4810 | <i>L. braziliensis</i> | 240 | 103  | 342  |
| LbrM35_V2.4820 | <i>L. braziliensis</i> | 80  | 1    | 80   |
| LbrM35_V2.4830 | <i>L. braziliensis</i> | 99  | 13   | 111  |
| LbrM35_V2.4830 | <i>L. braziliensis</i> | 72  | 317  | 388  |

|                |                        |     |      |      |
|----------------|------------------------|-----|------|------|
| LbrM35_V2.4830 | <i>L. braziliensis</i> | 72  | 317  | 388  |
| LbrM35_V2.4840 | <i>L. braziliensis</i> | 83  | 56   | 138  |
| LbrM35_V2.4840 | <i>L. braziliensis</i> | 57  | 203  | 259  |
| LbrM35_V2.4840 | <i>L. braziliensis</i> | 73  | 284  | 356  |
| LbrM35_V2.4840 | <i>L. braziliensis</i> | 54  | 542  | 595  |
| LbrM35_V2.4840 | <i>L. braziliensis</i> | 66  | 632  | 697  |
| LbrM35_V2.4860 | <i>L. braziliensis</i> | 46  | 14   | 59   |
| LbrM35_V2.4860 | <i>L. braziliensis</i> | 62  | 97   | 158  |
| LbrM35_V2.4860 | <i>L. braziliensis</i> | 40  | 231  | 270  |
| LbrM35_V2.4860 | <i>L. braziliensis</i> | 92  | 324  | 415  |
| LbrM35_V2.4870 | <i>L. braziliensis</i> | 44  | 48   | 91   |
| LbrM35_V2.4870 | <i>L. braziliensis</i> | 56  | 721  | 776  |
| LbrM35_V2.4870 | <i>L. braziliensis</i> | 56  | 721  | 776  |
| LbrM35_V2.4890 | <i>L. braziliensis</i> | 187 | 365  | 551  |
| LbrM35_V2.4910 | <i>L. braziliensis</i> | 40  | 68   | 107  |
| LbrM35_V2.4910 | <i>L. braziliensis</i> | 120 | 258  | 377  |
| LbrM35_V2.4910 | <i>L. braziliensis</i> | 84  | 701  | 784  |
| LbrM35_V2.4910 | <i>L. braziliensis</i> | 86  | 813  | 898  |
| LbrM35_V2.4920 | <i>L. braziliensis</i> | 95  | 16   | 110  |
| LbrM35_V2.4940 | <i>L. braziliensis</i> | 44  | 195  | 238  |
| LbrM35_V2.4940 | <i>L. braziliensis</i> | 777 | 654  | 1430 |
| LbrM35_V2.4940 | <i>L. braziliensis</i> | 116 | 1459 | 1574 |
| LbrM35_V2.4940 | <i>L. braziliensis</i> | 186 | 1601 | 1786 |
| LbrM35_V2.4950 | <i>L. braziliensis</i> | 66  | 59   | 124  |
| LbrM35_V2.4950 | <i>L. braziliensis</i> | 40  | 174  | 213  |
| LbrM35_V2.4950 | <i>L. braziliensis</i> | 40  | 275  | 314  |
| LbrM35_V2.4950 | <i>L. braziliensis</i> | 95  | 319  | 413  |
| LbrM35_V2.4950 | <i>L. braziliensis</i> | 91  | 559  | 649  |
| LbrM35_V2.4950 | <i>L. braziliensis</i> | 53  | 780  | 832  |
| LbrM35_V2.4960 | <i>L. braziliensis</i> | 46  | 148  | 193  |
| LbrM35_V2.4960 | <i>L. braziliensis</i> | 280 | 447  | 726  |
| LbrM35_V2.4970 | <i>L. braziliensis</i> | 113 | 627  | 739  |
| LbrM35_V2.4970 | <i>L. braziliensis</i> | 135 | 1307 | 1441 |
| LbrM35_V2.4970 | <i>L. braziliensis</i> | 135 | 1307 | 1441 |
| LbrM35_V2.4980 | <i>L. braziliensis</i> | 51  | 169  | 219  |
| LbrM35_V2.4980 | <i>L. braziliensis</i> | 82  | 453  | 534  |
| LbrM35_V2.4980 | <i>L. braziliensis</i> | 376 | 908  | 1283 |
| LbrM35_V2.4980 | <i>L. braziliensis</i> | 142 | 1335 | 1476 |
| LbrM35_V2.4990 | <i>L. braziliensis</i> | 48  | 109  | 156  |
| LbrM35_V2.4990 | <i>L. braziliensis</i> | 65  | 483  | 547  |
| LbrM35_V2.4990 | <i>L. braziliensis</i> | 102 | 592  | 693  |
| LbrM35_V2.4990 | <i>L. braziliensis</i> | 137 | 769  | 905  |
| LbrM35_V2.4990 | <i>L. braziliensis</i> | 302 | 927  | 1228 |
| LbrM35_V2.4990 | <i>L. braziliensis</i> | 106 | 1293 | 1398 |
| LbrM35_V2.5000 | <i>L. braziliensis</i> | 41  | 42   | 82   |
| LbrM35_V2.5010 | <i>L. braziliensis</i> | 46  | 75   | 120  |
| LbrM35_V2.5010 | <i>L. braziliensis</i> | 54  | 143  | 196  |

|                |                        |     |      |      |
|----------------|------------------------|-----|------|------|
| LbrM35_V2.5010 | <i>L. braziliensis</i> | 54  | 143  | 196  |
| LbrM35_V2.5040 | <i>L. braziliensis</i> | 113 | 50   | 162  |
| LbrM35_V2.5040 | <i>L. braziliensis</i> | 185 | 196  | 380  |
| LbrM35_V2.5040 | <i>L. braziliensis</i> | 287 | 460  | 746  |
| LbrM35_V2.5040 | <i>L. braziliensis</i> | 76  | 845  | 920  |
| LbrM35_V2.5050 | <i>L. braziliensis</i> | 83  | 219  | 301  |
| LbrM35_V2.5070 | <i>L. braziliensis</i> | 54  | 1    | 54   |
| LbrM35_V2.5070 | <i>L. braziliensis</i> | 106 | 69   | 174  |
| LbrM35_V2.5070 | <i>L. braziliensis</i> | 106 | 69   | 174  |
| LbrM35_V2.5080 | <i>L. braziliensis</i> | 65  | 122  | 186  |
| LbrM35_V2.5090 | <i>L. braziliensis</i> | 42  | 138  | 179  |
| LbrM35_V2.5090 | <i>L. braziliensis</i> | 70  | 359  | 428  |
| LbrM35_V2.5090 | <i>L. braziliensis</i> | 58  | 777  | 834  |
| LbrM35_V2.5090 | <i>L. braziliensis</i> | 113 | 891  | 1003 |
| LbrM35_V2.5100 | <i>L. braziliensis</i> | 96  | 25   | 120  |
| LbrM35_V2.5100 | <i>L. braziliensis</i> | 84  | 219  | 302  |
| LbrM35_V2.5100 | <i>L. braziliensis</i> | 119 | 489  | 607  |
| LbrM35_V2.5130 | <i>L. braziliensis</i> | 103 | 216  | 318  |
| LbrM35_V2.5150 | <i>L. braziliensis</i> | 122 | 1    | 122  |
| LbrM35_V2.5150 | <i>L. braziliensis</i> | 171 | 127  | 297  |
| LbrM35_V2.5150 | <i>L. braziliensis</i> | 40  | 1158 | 1197 |
| LbrM35_V2.5150 | <i>L. braziliensis</i> | 80  | 1363 | 1442 |
| LbrM35_V2.5150 | <i>L. braziliensis</i> | 54  | 1599 | 1652 |
| LbrM35_V2.5150 | <i>L. braziliensis</i> | 76  | 1742 | 1817 |
| LbrM35_V2.5150 | <i>L. braziliensis</i> | 47  | 1981 | 2027 |
| LbrM35_V2.5150 | <i>L. braziliensis</i> | 57  | 2075 | 2131 |
| LbrM35_V2.5160 | <i>L. braziliensis</i> | 360 | 1    | 360  |
| LbrM35_V2.5170 | <i>L. braziliensis</i> | 94  | 103  | 196  |
| LbrM35_V2.5170 | <i>L. braziliensis</i> | 222 | 342  | 563  |
| LbrM35_V2.5170 | <i>L. braziliensis</i> | 40  | 592  | 631  |
| LbrM35_V2.5200 | <i>L. braziliensis</i> | 117 | 199  | 315  |
| LbrM35_V2.5200 | <i>L. braziliensis</i> | 69  | 586  | 654  |
| LbrM35_V2.5210 | <i>L. braziliensis</i> | 168 | 260  | 427  |
| LbrM35_V2.5220 | <i>L. braziliensis</i> | 63  | 85   | 147  |
| LbrM35_V2.5220 | <i>L. braziliensis</i> | 79  | 212  | 290  |
| LbrM35_V2.5220 | <i>L. braziliensis</i> | 55  | 299  | 353  |
| LbrM35_V2.5230 | <i>L. braziliensis</i> | 108 | 49   | 156  |
| LbrM35_V2.5250 | <i>L. braziliensis</i> | 50  | 294  | 343  |
| LbrM35_V2.5270 | <i>L. braziliensis</i> | 242 | 68   | 309  |
| LbrM35_V2.5270 | <i>L. braziliensis</i> | 51  | 312  | 362  |
| LbrM35_V2.5270 | <i>L. braziliensis</i> | 228 | 384  | 611  |
| LbrM35_V2.5270 | <i>L. braziliensis</i> | 173 | 673  | 845  |
| LbrM35_V2.5280 | <i>L. braziliensis</i> | 317 | 1    | 317  |
| LbrM35_V2.5310 | <i>L. braziliensis</i> | 43  | 10   | 52   |
| LbrM35_V2.5310 | <i>L. braziliensis</i> | 98  | 156  | 253  |
| LbrM35_V2.5320 | <i>L. braziliensis</i> | 44  | 107  | 150  |
| LbrM35_V2.5330 | <i>L. braziliensis</i> | 115 | 1    | 115  |

|                  |                        |     |      |      |
|------------------|------------------------|-----|------|------|
| LbrM35_V2.5330   | <i>L. braziliensis</i> | 62  | 212  | 273  |
| LbrM35_V2.5330   | <i>L. braziliensis</i> | 67  | 354  | 420  |
| LbrM35_V2.5340   | <i>L. braziliensis</i> | 64  | 213  | 276  |
| LbrM35_V2.5350   | <i>L. braziliensis</i> | 255 | 1    | 255  |
| LbrM35_V2.5350   | <i>L. braziliensis</i> | 154 | 375  | 528  |
| LbrM35_V2.5350   | <i>L. braziliensis</i> | 65  | 612  | 676  |
| LbrM35_V2.5360   | <i>L. braziliensis</i> | 42  | 203  | 244  |
| LbrM35_V2.5390   | <i>L. braziliensis</i> | 217 | 294  | 510  |
| LbrM35_V2.5400   | <i>L. braziliensis</i> | 260 | 366  | 625  |
| LbrM35_V2.5410   | <i>L. braziliensis</i> | 70  | 199  | 268  |
| LbrM35_V2.5410   | <i>L. braziliensis</i> | 76  | 300  | 375  |
| LbrM35_V2.5440   | <i>L. braziliensis</i> | 227 | 1    | 227  |
| LbrM35_V2.5440   | <i>L. braziliensis</i> | 73  | 669  | 741  |
| LbrM35_V2.5440   | <i>L. braziliensis</i> | 87  | 1055 | 1141 |
| LbrM35_V2.5460   | <i>L. braziliensis</i> | 55  | 1137 | 1191 |
| LbrM35_V2.5490   | <i>L. braziliensis</i> | 79  | 53   | 131  |
| LbrM35_V2.5490   | <i>L. braziliensis</i> | 75  | 294  | 368  |
| LbrM35_V2.5500.A | <i>L. braziliensis</i> | 43  | 53   | 95   |
| LbrM35_V2.5500.A | <i>L. braziliensis</i> | 41  | 160  | 200  |
| LbrM35_V2.5500.A | <i>L. braziliensis</i> | 57  | 267  | 323  |
| LbrM35_V2.5500.A | <i>L. braziliensis</i> | 158 | 358  | 515  |
| LbrM35_V2.5500.A | <i>L. braziliensis</i> | 87  | 555  | 641  |
| LbrM35_V2.5500.A | <i>L. braziliensis</i> | 724 | 907  | 1630 |
| LbrM35_V2.5510   | <i>L. braziliensis</i> | 60  | 265  | 324  |
| LbrM35_V2.5510   | <i>L. braziliensis</i> | 158 | 689  | 846  |
| LbrM35_V2.5520   | <i>L. braziliensis</i> | 62  | 50   | 111  |
| LbrM35_V2.5520   | <i>L. braziliensis</i> | 41  | 280  | 320  |
| LbrM35_V2.5520   | <i>L. braziliensis</i> | 83  | 663  | 745  |
| LbrM35_V2.5530   | <i>L. braziliensis</i> | 64  | 308  | 371  |
| LbrM35_V2.5530   | <i>L. braziliensis</i> | 92  | 435  | 526  |
| LbrM35_V2.5530   | <i>L. braziliensis</i> | 42  | 683  | 724  |
| LbrM35_V2.5540   | <i>L. braziliensis</i> | 74  | 11   | 84   |
| LbrM35_V2.5540   | <i>L. braziliensis</i> | 41  | 117  | 157  |
| LbrM35_V2.5540   | <i>L. braziliensis</i> | 41  | 117  | 157  |
| LbrM35_V2.5550   | <i>L. braziliensis</i> | 49  | 1    | 49   |
| LbrM35_V2.5550   | <i>L. braziliensis</i> | 101 | 105  | 205  |
| LbrM35_V2.5550   | <i>L. braziliensis</i> | 203 | 498  | 700  |
| LbrM35_V2.5560   | <i>L. braziliensis</i> | 48  | 1    | 48   |
| LbrM35_V2.5560   | <i>L. braziliensis</i> | 80  | 93   | 172  |
| LbrM35_V2.5560   | <i>L. braziliensis</i> | 54  | 318  | 371  |
| LbrM35_V2.5570   | <i>L. braziliensis</i> | 84  | 426  | 509  |
| LbrM35_V2.5580   | <i>L. braziliensis</i> | 151 | 143  | 293  |
| LbrM35_V2.5580   | <i>L. braziliensis</i> | 56  | 693  | 748  |
| LbrM35_V2.5580   | <i>L. braziliensis</i> | 55  | 887  | 941  |
| LbrM35_V2.5580   | <i>L. braziliensis</i> | 85  | 946  | 1030 |
| LbrM35_V2.5590   | <i>L. braziliensis</i> | 646 | 1    | 646  |
| LbrM35_V2.5590   | <i>L. braziliensis</i> | 40  | 684  | 723  |

|                |                        |     |      |      |
|----------------|------------------------|-----|------|------|
| LbrM35_V2.5590 | <i>L. braziliensis</i> | 45  | 752  | 796  |
| LbrM35_V2.5600 | <i>L. braziliensis</i> | 42  | 1    | 42   |
| LbrM35_V2.5600 | <i>L. braziliensis</i> | 71  | 339  | 409  |
| LbrM35_V2.5600 | <i>L. braziliensis</i> | 57  | 452  | 508  |
| LbrM35_V2.5600 | <i>L. braziliensis</i> | 85  | 614  | 698  |
| LbrM35_V2.5600 | <i>L. braziliensis</i> | 308 | 713  | 1020 |
| LbrM35_V2.5620 | <i>L. braziliensis</i> | 44  | 1    | 44   |
| LbrM35_V2.5630 | <i>L. braziliensis</i> | 175 | 314  | 488  |
| LbrM35_V2.5640 | <i>L. braziliensis</i> | 77  | 451  | 527  |
| LbrM35_V2.5660 | <i>L. braziliensis</i> | 72  | 1    | 72   |
| LbrM35_V2.5660 | <i>L. braziliensis</i> | 97  | 343  | 439  |
| LbrM35_V2.5680 | <i>L. braziliensis</i> | 99  | 186  | 284  |
| LbrM35_V2.5690 | <i>L. braziliensis</i> | 46  | 197  | 242  |
| LbrM35_V2.5700 | <i>L. braziliensis</i> | 288 | 1    | 288  |
| LbrM35_V2.5700 | <i>L. braziliensis</i> | 49  | 390  | 438  |
| LbrM35_V2.5710 | <i>L. braziliensis</i> | 46  | 141  | 186  |
| LbrM35_V2.5730 | <i>L. braziliensis</i> | 80  | 24   | 103  |
| LbrM35_V2.5730 | <i>L. braziliensis</i> | 103 | 189  | 291  |
| LbrM35_V2.5730 | <i>L. braziliensis</i> | 67  | 357  | 423  |
| LbrM35_V2.5730 | <i>L. braziliensis</i> | 44  | 668  | 711  |
| LbrM35_V2.5740 | <i>L. braziliensis</i> | 63  | 1    | 63   |
| LbrM35_V2.5750 | <i>L. braziliensis</i> | 80  | 1    | 80   |
| LbrM35_V2.5750 | <i>L. braziliensis</i> | 65  | 154  | 218  |
| LbrM35_V2.5760 | <i>L. braziliensis</i> | 137 | 28   | 164  |
| LbrM35_V2.5760 | <i>L. braziliensis</i> | 121 | 404  | 524  |
| LbrM35_V2.5760 | <i>L. braziliensis</i> | 64  | 561  | 624  |
| LbrM35_V2.5770 | <i>L. braziliensis</i> | 97  | 1    | 97   |
| LbrM35_V2.5770 | <i>L. braziliensis</i> | 64  | 156  | 219  |
| LbrM35_V2.5770 | <i>L. braziliensis</i> | 45  | 251  | 295  |
| LbrM35_V2.5780 | <i>L. braziliensis</i> | 63  | 1    | 63   |
| LbrM35_V2.5790 | <i>L. braziliensis</i> | 59  | 1    | 59   |
| LbrM35_V2.5820 | <i>L. braziliensis</i> | 73  | 11   | 83   |
| LbrM35_V2.5820 | <i>L. braziliensis</i> | 85  | 480  | 564  |
| LbrM35_V2.5820 | <i>L. braziliensis</i> | 55  | 1248 | 1302 |
| LbrM35_V2.5830 | <i>L. braziliensis</i> | 57  | 324  | 380  |
| LbrM35_V2.5850 | <i>L. braziliensis</i> | 70  | 89   | 158  |
| LbrM35_V2.5850 | <i>L. braziliensis</i> | 63  | 302  | 364  |
| LbrM35_V2.5850 | <i>L. braziliensis</i> | 63  | 302  | 364  |
| LbrM35_V2.5860 | <i>L. braziliensis</i> | 58  | 42   | 99   |
| LbrM35_V2.5880 | <i>L. braziliensis</i> | 173 | 29   | 201  |
| LbrM35_V2.5880 | <i>L. braziliensis</i> | 60  | 341  | 400  |
| LbrM35_V2.5910 | <i>L. braziliensis</i> | 69  | 86   | 154  |
| LbrM35_V2.5920 | <i>L. braziliensis</i> | 107 | 384  | 490  |
| LbrM35_V2.5930 | <i>L. braziliensis</i> | 79  | 201  | 279  |
| LbrM35_V2.5940 | <i>L. braziliensis</i> | 108 | 291  | 398  |
| LbrM35_V2.5940 | <i>L. braziliensis</i> | 44  | 524  | 567  |
| LbrM35_V2.5940 | <i>L. braziliensis</i> | 67  | 650  | 716  |

|                |                        |     |      |      |
|----------------|------------------------|-----|------|------|
| LbrM35_V2.5950 | <i>L. braziliensis</i> | 55  | 548  | 602  |
| LbrM35_V2.5970 | <i>L. braziliensis</i> | 48  | 229  | 276  |
| LbrM35_V2.5980 | <i>L. braziliensis</i> | 51  | 412  | 462  |
| LbrM35_V2.5980 | <i>L. braziliensis</i> | 61  | 505  | 565  |
| LbrM35_V2.5980 | <i>L. braziliensis</i> | 157 | 634  | 790  |
| LbrM35_V2.6010 | <i>L. braziliensis</i> | 62  | 332  | 393  |
| LbrM35_V2.6020 | <i>L. braziliensis</i> | 40  | 26   | 65   |
| LbrM35_V2.6020 | <i>L. braziliensis</i> | 285 | 75   | 359  |
| LbrM35_V2.6020 | <i>L. braziliensis</i> | 68  | 405  | 472  |
| LbrM35_V2.6020 | <i>L. braziliensis</i> | 211 | 480  | 690  |
| LbrM35_V2.6030 | <i>L. braziliensis</i> | 53  | 77   | 129  |
| LbrM35_V2.6040 | <i>L. braziliensis</i> | 40  | 200  | 239  |
| LbrM35_V2.6040 | <i>L. braziliensis</i> | 53  | 243  | 295  |
| LbrM35_V2.6040 | <i>L. braziliensis</i> | 56  | 334  | 389  |
| LbrM35_V2.6040 | <i>L. braziliensis</i> | 43  | 864  | 906  |
| LbrM35_V2.6040 | <i>L. braziliensis</i> | 59  | 1073 | 1131 |
| LbrM35_V2.6040 | <i>L. braziliensis</i> | 53  | 1449 | 1501 |
| LbrM35_V2.6040 | <i>L. braziliensis</i> | 73  | 1625 | 1697 |
| LbrM35_V2.6060 | <i>L. braziliensis</i> | 64  | 153  | 216  |
| LbrM35_V2.6070 | <i>L. braziliensis</i> | 54  | 215  | 268  |
| LbrM35_V2.6080 | <i>L. braziliensis</i> | 50  | 26   | 75   |
| LbrM35_V2.6080 | <i>L. braziliensis</i> | 47  | 297  | 343  |
| LbrM35_V2.6080 | <i>L. braziliensis</i> | 77  | 787  | 863  |
| LbrM35_V2.6080 | <i>L. braziliensis</i> | 48  | 1090 | 1137 |
| LbrM35_V2.6090 | <i>L. braziliensis</i> | 90  | 204  | 293  |
| LbrM35_V2.6090 | <i>L. braziliensis</i> | 67  | 354  | 420  |
| LbrM35_V2.6100 | <i>L. braziliensis</i> | 267 | 69   | 335  |
| LbrM35_V2.6100 | <i>L. braziliensis</i> | 56  | 380  | 435  |
| LbrM35_V2.6110 | <i>L. braziliensis</i> | 61  | 1    | 61   |
| LbrM35_V2.6120 | <i>L. braziliensis</i> | 43  | 30   | 72   |
| LbrM35_V2.6120 | <i>L. braziliensis</i> | 255 | 91   | 345  |
| LbrM35_V2.6130 | <i>L. braziliensis</i> | 77  | 34   | 110  |
| LbrM35_V2.6150 | <i>L. braziliensis</i> | 159 | 1    | 159  |
| LbrM35_V2.6150 | <i>L. braziliensis</i> | 69  | 201  | 269  |
| LbrM35_V2.6150 | <i>L. braziliensis</i> | 228 | 278  | 505  |
| LbrM35_V2.6160 | <i>L. braziliensis</i> | 77  | 47   | 123  |
| LbrM35_V2.6170 | <i>L. braziliensis</i> | 60  | 220  | 279  |
| LbrM35_V2.6170 | <i>L. braziliensis</i> | 67  | 593  | 659  |
| LbrM35_V2.6170 | <i>L. braziliensis</i> | 67  | 593  | 659  |
| LbrM35_V2.6190 | <i>L. braziliensis</i> | 64  | 62   | 125  |
| LbrM35_V2.6190 | <i>L. braziliensis</i> | 107 | 421  | 527  |
| LbrM35_V2.6190 | <i>L. braziliensis</i> | 59  | 1120 | 1178 |
| LbrM35_V2.6190 | <i>L. braziliensis</i> | 57  | 1258 | 1314 |
| LbrM35_V2.6190 | <i>L. braziliensis</i> | 49  | 1843 | 1891 |
| LbrM35_V2.6210 | <i>L. braziliensis</i> | 49  | 32   | 80   |
| LbrM35_V2.6210 | <i>L. braziliensis</i> | 50  | 117  | 166  |
| LbrM35_V2.6220 | <i>L. braziliensis</i> | 56  | 92   | 147  |

|                |                        |     |      |      |
|----------------|------------------------|-----|------|------|
| LbrM35_V2.6230 | <i>L. braziliensis</i> | 292 | 1    | 292  |
| LbrM35_V2.6240 | <i>L. braziliensis</i> | 75  | 61   | 135  |
| LbrM35_V2.6260 | <i>L. braziliensis</i> | 55  | 1    | 55   |
| LbrM35_V2.6260 | <i>L. braziliensis</i> | 58  | 92   | 149  |
| LbrM35_V2.6260 | <i>L. braziliensis</i> | 107 | 223  | 329  |
| LbrM35_V2.6270 | <i>L. braziliensis</i> | 50  | 1    | 50   |
| LbrM35_V2.6280 | <i>L. braziliensis</i> | 46  | 375  | 420  |
| LbrM35_V2.6280 | <i>L. braziliensis</i> | 213 | 424  | 636  |
| LbrM35_V2.6290 | <i>L. braziliensis</i> | 156 | 1    | 156  |
| LbrM35_V2.6290 | <i>L. braziliensis</i> | 51  | 491  | 541  |
| LbrM35_V2.6300 | <i>L. braziliensis</i> | 95  | 157  | 251  |
| LbrM35_V2.6300 | <i>L. braziliensis</i> | 292 | 385  | 676  |
| LbrM35_V2.6310 | <i>L. braziliensis</i> | 59  | 1    | 59   |
| LbrM35_V2.6310 | <i>L. braziliensis</i> | 89  | 78   | 166  |
| LbrM35_V2.6310 | <i>L. braziliensis</i> | 50  | 197  | 246  |
| LbrM35_V2.6310 | <i>L. braziliensis</i> | 234 | 263  | 496  |
| LbrM35_V2.6310 | <i>L. braziliensis</i> | 84  | 658  | 741  |
| LbrM35_V2.6310 | <i>L. braziliensis</i> | 61  | 764  | 824  |
| LbrM35_V2.6320 | <i>L. braziliensis</i> | 185 | 43   | 227  |
| LbrM35_V2.6320 | <i>L. braziliensis</i> | 97  | 257  | 353  |
| LbrM35_V2.6320 | <i>L. braziliensis</i> | 151 | 388  | 538  |
| LbrM35_V2.6340 | <i>L. braziliensis</i> | 84  | 560  | 643  |
| LbrM35_V2.6340 | <i>L. braziliensis</i> | 116 | 860  | 975  |
| LbrM35_V2.6340 | <i>L. braziliensis</i> | 57  | 1014 | 1070 |
| LbrM35_V2.6340 | <i>L. braziliensis</i> | 56  | 1107 | 1162 |
| LbrM35_V2.6340 | <i>L. braziliensis</i> | 84  | 1299 | 1382 |
| LbrM35_V2.6340 | <i>L. braziliensis</i> | 119 | 1444 | 1562 |
| LbrM35_V2.6340 | <i>L. braziliensis</i> | 64  | 1663 | 1726 |
| LbrM35_V2.6350 | <i>L. braziliensis</i> | 69  | 1    | 69   |
| LbrM35_V2.6350 | <i>L. braziliensis</i> | 45  | 91   | 135  |
| LbrM35_V2.6350 | <i>L. braziliensis</i> | 40  | 275  | 314  |
| LbrM35_V2.6350 | <i>L. braziliensis</i> | 50  | 370  | 419  |
| LbrM35_V2.6350 | <i>L. braziliensis</i> | 59  | 865  | 923  |
| LbrM35_V2.6370 | <i>L. braziliensis</i> | 40  | 156  | 195  |
| LbrM35_V2.6370 | <i>L. braziliensis</i> | 183 | 335  | 517  |
| LbrM35_V2.6380 | <i>L. braziliensis</i> | 168 | 1    | 168  |
| LbrM35_V2.6390 | <i>L. braziliensis</i> | 69  | 38   | 106  |
| LbrM35_V2.6430 | <i>L. braziliensis</i> | 53  | 270  | 322  |
| LbrM35_V2.6440 | <i>L. braziliensis</i> | 361 | 12   | 372  |
| LbrM35_V2.6440 | <i>L. braziliensis</i> | 52  | 411  | 462  |
| LbrM35_V2.6440 | <i>L. braziliensis</i> | 91  | 475  | 565  |
| LbrM35_V2.6440 | <i>L. braziliensis</i> | 92  | 576  | 667  |
| LbrM35_V2.6450 | <i>L. braziliensis</i> | 81  | 118  | 198  |
| LbrM35_V2.6450 | <i>L. braziliensis</i> | 507 | 273  | 779  |
| LbrM35_V2.6460 | <i>L. braziliensis</i> | 183 | 110  | 292  |
| LbrM35_V2.6470 | <i>L. braziliensis</i> | 212 | 1    | 212  |
| LbrM35_V2.6520 | <i>L. braziliensis</i> | 43  | 1    | 43   |



|                |                        |     |      |      |
|----------------|------------------------|-----|------|------|
| LbrM35_V2.6530 | <i>L. braziliensis</i> | 40  | 831  | 870  |
| LbrM35_V2.6530 | <i>L. braziliensis</i> | 40  | 1125 | 1164 |
| LbrM35_V2.6530 | <i>L. braziliensis</i> | 40  | 1125 | 1164 |
| LbrM35_V2.6540 | <i>L. braziliensis</i> | 51  | 50   | 100  |
| LbrM35_V2.6540 | <i>L. braziliensis</i> | 119 | 137  | 255  |
| LbrM35_V2.6540 | <i>L. braziliensis</i> | 49  | 264  | 312  |
| LbrM35_V2.6540 | <i>L. braziliensis</i> | 65  | 322  | 386  |
| LbrM35_V2.6540 | <i>L. braziliensis</i> | 445 | 459  | 903  |
| LbrM35_V2.6540 | <i>L. braziliensis</i> | 174 | 918  | 1091 |
| LbrM35_V2.6540 | <i>L. braziliensis</i> | 333 | 1168 | 1500 |
| LbrM35_V2.6560 | <i>L. braziliensis</i> | 55  | 1    | 55   |
| LbrM35_V2.6560 | <i>L. braziliensis</i> | 334 | 301  | 634  |
| LbrM35_V2.6560 | <i>L. braziliensis</i> | 85  | 650  | 734  |
| LbrM35_V2.6570 | <i>L. braziliensis</i> | 133 | 167  | 299  |
| LbrM35_V2.6590 | <i>L. braziliensis</i> | 83  | 30   | 112  |
| LbrM35_V2.6590 | <i>L. braziliensis</i> | 44  | 123  | 166  |
| LbrM35_V2.6590 | <i>L. braziliensis</i> | 44  | 123  | 166  |
| LbrM35_V2.6620 | <i>L. braziliensis</i> | 40  | 1    | 40   |
| LbrM35_V2.6620 | <i>L. braziliensis</i> | 112 | 2410 | 2521 |
| LbrM35_V2.6620 | <i>L. braziliensis</i> | 112 | 2410 | 2521 |
| LbrM35_V2.6640 | <i>L. braziliensis</i> | 45  | 1299 | 1343 |
| LbrM35_V2.6640 | <i>L. braziliensis</i> | 46  | 1882 | 1927 |
| LbrM35_V2.6640 | <i>L. braziliensis</i> | 44  | 2235 | 2278 |
| LbrM35_V2.6640 | <i>L. braziliensis</i> | 87  | 2282 | 2368 |
| LbrM35_V2.6640 | <i>L. braziliensis</i> | 41  | 2622 | 2662 |
| LbrM35_V2.6640 | <i>L. braziliensis</i> | 60  | 2999 | 3058 |
| LbrM35_V2.6640 | <i>L. braziliensis</i> | 45  | 3132 | 3176 |
| LbrM35_V2.6640 | <i>L. braziliensis</i> | 63  | 3216 | 3278 |
| LbrM35_V2.6670 | <i>L. braziliensis</i> | 95  | 44   | 138  |
| LbrM35_V2.6690 | <i>L. braziliensis</i> | 46  | 1    | 46   |
| LbrM35_V2.6690 | <i>L. braziliensis</i> | 62  | 205  | 266  |
| LbrM35_V2.6690 | <i>L. braziliensis</i> | 62  | 205  | 266  |
| LbrM35_V2.6700 | <i>L. braziliensis</i> | 205 | 74   | 278  |
| LbrM35_V2.6710 | <i>L. braziliensis</i> | 61  | 357  | 417  |
| LbrM35_V2.6730 | <i>L. braziliensis</i> | 168 | 1    | 168  |
| LbrM35_V2.6740 | <i>L. braziliensis</i> | 322 | 192  | 513  |
| LbrM35_V2.6750 | <i>L. braziliensis</i> | 57  | 149  | 205  |
| LbrM35_V2.6760 | <i>L. braziliensis</i> | 102 | 15   | 116  |
| LbrM35_V2.6770 | <i>L. braziliensis</i> | 70  | 242  | 311  |
| LbrM35_V2.6800 | <i>L. braziliensis</i> | 388 | 53   | 440  |
| LbrM35_V2.6820 | <i>L. braziliensis</i> | 62  | 429  | 490  |
| LbrM35_V2.6830 | <i>L. braziliensis</i> | 139 | 187  | 325  |
| LbrM35_V2.6840 | <i>L. braziliensis</i> | 157 | 114  | 270  |
| LbrM35_V2.6840 | <i>L. braziliensis</i> | 57  | 524  | 580  |
| LbrM35_V2.6850 | <i>L. braziliensis</i> | 49  | 19   | 67   |
| LbrM35_V2.6860 | <i>L. braziliensis</i> | 132 | 1    | 132  |
| LbrM35_V2.6860 | <i>L. braziliensis</i> | 58  | 210  | 267  |

|                |                        |     |     |     |
|----------------|------------------------|-----|-----|-----|
| LbrM35_V2.6860 | <i>L. braziliensis</i> | 335 | 366 | 700 |
| LbrM35_V2.6880 | <i>L. braziliensis</i> | 143 | 11  | 153 |
| LbrM35_V2.6880 | <i>L. braziliensis</i> | 110 | 454 | 563 |
| LbrM35_V2.6890 | <i>L. braziliensis</i> | 131 | 47  | 177 |
| LbrM35_V2.6890 | <i>L. braziliensis</i> | 176 | 219 | 394 |
| LbrM35_V2.6920 | <i>L. braziliensis</i> | 91  | 93  | 183 |
| LbrM35_V2.6920 | <i>L. braziliensis</i> | 79  | 218 | 296 |
| LbrM35_V2.6930 | <i>L. braziliensis</i> | 299 | 64  | 362 |
| LbrM35_V2.6950 | <i>L. braziliensis</i> | 111 | 1   | 111 |
| LbrM35_V2.6950 | <i>L. braziliensis</i> | 43  | 144 | 186 |
| LbrM35_V2.6950 | <i>L. braziliensis</i> | 88  | 195 | 282 |
| LbrM35_V2.6950 | <i>L. braziliensis</i> | 71  | 297 | 367 |
| LbrM35_V2.6950 | <i>L. braziliensis</i> | 41  | 406 | 446 |
| LbrM35_V2.6950 | <i>L. braziliensis</i> | 41  | 526 | 566 |
| LbrM35_V2.6960 | <i>L. braziliensis</i> | 46  | 691 | 736 |
| LbrM35_V2.6970 | <i>L. braziliensis</i> | 45  | 1   | 45  |
| LbrM35_V2.6990 | <i>L. braziliensis</i> | 45  | 83  | 127 |
| LbrM35_V2.7020 | <i>L. braziliensis</i> | 51  | 348 | 398 |
| LbrM35_V2.7040 | <i>L. braziliensis</i> | 102 | 37  | 138 |
| LbrM35_V2.7080 | <i>L. braziliensis</i> | 76  | 391 | 466 |
| LbrM35_V2.7080 | <i>L. braziliensis</i> | 68  | 828 | 895 |
| LbrM35_V2.7120 | <i>L. braziliensis</i> | 143 | 604 | 746 |
| LbrM35_V2.7130 | <i>L. braziliensis</i> | 46  | 247 | 292 |
| LbrM35_V2.7150 | <i>L. braziliensis</i> | 50  | 432 | 481 |
| LbrM35_V2.7160 | <i>L. braziliensis</i> | 56  | 266 | 321 |
| LbrM35_V2.7200 | <i>L. braziliensis</i> | 41  | 1   | 41  |
| LbrM35_V2.7200 | <i>L. braziliensis</i> | 70  | 81  | 150 |
| LbrM35_V2.7200 | <i>L. braziliensis</i> | 70  | 81  | 150 |
| LbrM35_V2.7220 | <i>L. braziliensis</i> | 65  | 569 | 633 |
| LbrM35_V2.7220 | <i>L. braziliensis</i> | 54  | 639 | 692 |
| LbrM35_V2.7220 | <i>L. braziliensis</i> | 54  | 639 | 692 |
| LbrM35_V2.7230 | <i>L. braziliensis</i> | 110 | 1   | 110 |
| LbrM35_V2.7250 | <i>L. braziliensis</i> | 116 | 171 | 286 |
| LbrM35_V2.7270 | <i>L. braziliensis</i> | 163 | 375 | 537 |
| LbrM35_V2.7270 | <i>L. braziliensis</i> | 171 | 556 | 726 |
| LbrM35_V2.7300 | <i>L. braziliensis</i> | 73  | 81  | 153 |
| LbrM35_V2.7300 | <i>L. braziliensis</i> | 275 | 235 | 509 |
| LbrM35_V2.7320 | <i>L. braziliensis</i> | 53  | 121 | 173 |
| LbrM35_V2.7340 | <i>L. braziliensis</i> | 209 | 1   | 209 |
| LbrM35_V2.7340 | <i>L. braziliensis</i> | 45  | 280 | 324 |
| LbrM35_V2.7360 | <i>L. braziliensis</i> | 55  | 1   | 55  |
| LbrM35_V2.7360 | <i>L. braziliensis</i> | 60  | 127 | 186 |
| LbrM35_V2.7360 | <i>L. braziliensis</i> | 43  | 689 | 731 |
| LmjF01.0010    | <i>L. major</i>        | 44  | 289 | 332 |
| LmjF01.0020    | <i>L. major</i>        | 68  | 23  | 90  |
| LmjF01.0020    | <i>L. major</i>        | 57  | 413 | 469 |
| LmjF01.0030    | <i>L. major</i>        | 65  | 70  | 134 |

|             |                 |     |     |     |
|-------------|-----------------|-----|-----|-----|
| LmjF01.0030 | <i>L. major</i> | 43  | 314 | 356 |
| LmjF01.0030 | <i>L. major</i> | 131 | 449 | 579 |
| LmjF01.0040 | <i>L. major</i> | 68  | 1   | 68  |
| LmjF01.0060 | <i>L. major</i> | 112 | 138 | 249 |
| LmjF01.0070 | <i>L. major</i> | 72  | 75  | 146 |
| LmjF01.0070 | <i>L. major</i> | 60  | 239 | 298 |
| LmjF01.0070 | <i>L. major</i> | 98  | 501 | 598 |
| LmjF01.0110 | <i>L. major</i> | 66  | 27  | 92  |
| LmjF01.0120 | <i>L. major</i> | 337 | 96  | 432 |
| LmjF01.0130 | <i>L. major</i> | 52  | 1   | 52  |
| LmjF01.0130 | <i>L. major</i> | 187 | 178 | 364 |
| LmjF01.0150 | <i>L. major</i> | 41  | 63  | 103 |
| LmjF01.0170 | <i>L. major</i> | 223 | 1   | 223 |
| LmjF01.0170 | <i>L. major</i> | 40  | 304 | 343 |
| LmjF01.0170 | <i>L. major</i> | 110 | 349 | 458 |
| LmjF01.0180 | <i>L. major</i> | 46  | 727 | 772 |
| LmjF01.0190 | <i>L. major</i> | 48  | 31  | 78  |
| LmjF01.0190 | <i>L. major</i> | 83  | 114 | 196 |
| LmjF01.0200 | <i>L. major</i> | 92  | 94  | 185 |
| LmjF01.0210 | <i>L. major</i> | 105 | 1   | 105 |
| LmjF01.0210 | <i>L. major</i> | 110 | 238 | 347 |
| LmjF01.0210 | <i>L. major</i> | 108 | 373 | 480 |
| LmjF01.0210 | <i>L. major</i> | 59  | 670 | 728 |
| LmjF01.0220 | <i>L. major</i> | 48  | 57  | 104 |
| LmjF01.0240 | <i>L. major</i> | 123 | 1   | 123 |
| LmjF01.0240 | <i>L. major</i> | 41  | 389 | 429 |
| LmjF01.0240 | <i>L. major</i> | 215 | 711 | 925 |
| LmjF01.0250 | <i>L. major</i> | 187 | 1   | 187 |
| LmjF01.0250 | <i>L. major</i> | 303 | 212 | 514 |
| LmjF01.0260 | <i>L. major</i> | 281 | 1   | 281 |
| LmjF01.0280 | <i>L. major</i> | 42  | 13  | 54  |
| LmjF01.0280 | <i>L. major</i> | 40  | 126 | 165 |
| LmjF01.0280 | <i>L. major</i> | 40  | 126 | 165 |
| LmjF01.0290 | <i>L. major</i> | 54  | 1   | 54  |
| LmjF01.0340 | <i>L. major</i> | 134 | 1   | 134 |
| LmjF01.0350 | <i>L. major</i> | 219 | 374 | 592 |
| LmjF01.0350 | <i>L. major</i> | 132 | 603 | 734 |
| LmjF01.0360 | <i>L. major</i> | 114 | 1   | 114 |
| LmjF01.0370 | <i>L. major</i> | 41  | 148 | 188 |
| LmjF01.0380 | <i>L. major</i> | 98  | 661 | 758 |
| LmjF01.0390 | <i>L. major</i> | 107 | 1   | 107 |
| LmjF01.0390 | <i>L. major</i> | 96  | 208 | 303 |
| LmjF01.0390 | <i>L. major</i> | 80  | 490 | 569 |
| LmjF01.0390 | <i>L. major</i> | 77  | 746 | 822 |
| LmjF01.0400 | <i>L. major</i> | 55  | 83  | 137 |
| LmjF01.0400 | <i>L. major</i> | 143 | 225 | 367 |
| LmjF01.0400 | <i>L. major</i> | 143 | 225 | 367 |

|             |                 |     |      |      |
|-------------|-----------------|-----|------|------|
| LmjF01.0410 | <i>L. major</i> | 41  | 1    | 41   |
| LmjF01.0420 | <i>L. major</i> | 41  | 1    | 41   |
| LmjF01.0430 | <i>L. major</i> | 64  | 61   | 124  |
| LmjF01.0430 | <i>L. major</i> | 134 | 237  | 370  |
| LmjF01.0430 | <i>L. major</i> | 140 | 492  | 631  |
| LmjF01.0430 | <i>L. major</i> | 60  | 684  | 743  |
| LmjF01.0460 | <i>L. major</i> | 340 | 1    | 340  |
| LmjF01.0460 | <i>L. major</i> | 46  | 774  | 819  |
| LmjF01.0460 | <i>L. major</i> | 215 | 924  | 1138 |
| LmjF01.0460 | <i>L. major</i> | 265 | 1162 | 1426 |
| LmjF01.0510 | <i>L. major</i> | 84  | 63   | 146  |
| LmjF01.0510 | <i>L. major</i> | 41  | 154  | 194  |
| LmjF01.0530 | <i>L. major</i> | 269 | 29   | 297  |
| LmjF01.0530 | <i>L. major</i> | 68  | 399  | 466  |
| LmjF01.0530 | <i>L. major</i> | 72  | 503  | 574  |
| LmjF01.0530 | <i>L. major</i> | 392 | 654  | 1045 |
| LmjF01.0530 | <i>L. major</i> | 68  | 1083 | 1150 |
| LmjF01.0530 | <i>L. major</i> | 51  | 1487 | 1537 |
| LmjF01.0540 | <i>L. major</i> | 126 | 1    | 126  |
| LmjF01.0540 | <i>L. major</i> | 60  | 173  | 232  |
| LmjF01.0540 | <i>L. major</i> | 120 | 313  | 432  |
| LmjF01.0540 | <i>L. major</i> | 182 | 437  | 618  |
| LmjF01.0550 | <i>L. major</i> | 83  | 88   | 170  |
| LmjF01.0550 | <i>L. major</i> | 90  | 200  | 289  |
| LmjF01.0560 | <i>L. major</i> | 235 | 1    | 235  |
| LmjF01.0560 | <i>L. major</i> | 73  | 309  | 381  |
| LmjF01.0580 | <i>L. major</i> | 136 | 1    | 136  |
| LmjF01.0580 | <i>L. major</i> | 78  | 289  | 366  |
| LmjF01.0580 | <i>L. major</i> | 40  | 866  | 905  |
| LmjF01.0600 | <i>L. major</i> | 45  | 1    | 45   |
| LmjF01.0600 | <i>L. major</i> | 145 | 86   | 230  |
| LmjF01.0600 | <i>L. major</i> | 41  | 449  | 489  |
| LmjF01.0600 | <i>L. major</i> | 166 | 739  | 904  |
| LmjF01.0600 | <i>L. major</i> | 48  | 1493 | 1540 |
| LmjF01.0600 | <i>L. major</i> | 97  | 1614 | 1710 |
| LmjF01.0610 | <i>L. major</i> | 44  | 165  | 208  |
| LmjF01.0620 | <i>L. major</i> | 55  | 1    | 55   |
| LmjF01.0620 | <i>L. major</i> | 51  | 134  | 184  |
| LmjF01.0620 | <i>L. major</i> | 144 | 246  | 389  |
| LmjF01.0620 | <i>L. major</i> | 174 | 418  | 591  |
| LmjF01.0630 | <i>L. major</i> | 57  | 1    | 57   |
| LmjF01.0630 | <i>L. major</i> | 381 | 186  | 566  |
| LmjF01.0630 | <i>L. major</i> | 50  | 576  | 625  |
| LmjF01.0640 | <i>L. major</i> | 41  | 1    | 41   |
| LmjF01.0640 | <i>L. major</i> | 98  | 119  | 216  |
| LmjF01.0640 | <i>L. major</i> | 74  | 324  | 397  |
| LmjF01.0640 | <i>L. major</i> | 43  | 528  | 570  |

|             |                 |     |      |      |
|-------------|-----------------|-----|------|------|
| LmjF01.0640 | <i>L. major</i> | 89  | 886  | 974  |
| LmjF01.0660 | <i>L. major</i> | 245 | 1    | 245  |
| LmjF01.0660 | <i>L. major</i> | 74  | 321  | 394  |
| LmjF01.0660 | <i>L. major</i> | 77  | 453  | 529  |
| LmjF01.0660 | <i>L. major</i> | 121 | 653  | 773  |
| LmjF01.0660 | <i>L. major</i> | 269 | 828  | 1096 |
| LmjF01.0660 | <i>L. major</i> | 61  | 1098 | 1158 |
| LmjF01.0660 | <i>L. major</i> | 49  | 1182 | 1230 |
| LmjF01.0660 | <i>L. major</i> | 54  | 1318 | 1371 |
| LmjF01.0670 | <i>L. major</i> | 283 | 23   | 305  |
| LmjF01.0680 | <i>L. major</i> | 167 | 1    | 167  |
| LmjF01.0680 | <i>L. major</i> | 118 | 189  | 306  |
| LmjF01.0680 | <i>L. major</i> | 145 | 321  | 465  |
| LmjF01.0680 | <i>L. major</i> | 302 | 499  | 800  |
| LmjF01.0700 | <i>L. major</i> | 58  | 1    | 58   |
| LmjF01.0700 | <i>L. major</i> | 92  | 163  | 254  |
| LmjF01.0710 | <i>L. major</i> | 50  | 270  | 319  |
| LmjF01.0720 | <i>L. major</i> | 261 | 1    | 261  |
| LmjF01.0720 | <i>L. major</i> | 67  | 342  | 408  |
| LmjF01.0720 | <i>L. major</i> | 48  | 731  | 778  |
| LmjF01.0720 | <i>L. major</i> | 52  | 808  | 859  |
| LmjF01.0720 | <i>L. major</i> | 77  | 1130 | 1206 |
| LmjF01.0720 | <i>L. major</i> | 46  | 1426 | 1471 |
| LmjF01.0720 | <i>L. major</i> | 66  | 1512 | 1577 |
| LmjF01.0730 | <i>L. major</i> | 205 | 26   | 230  |
| LmjF01.0730 | <i>L. major</i> | 124 | 310  | 433  |
| LmjF01.0730 | <i>L. major</i> | 76  | 633  | 708  |
| LmjF01.0730 | <i>L. major</i> | 56  | 833  | 888  |
| LmjF01.0730 | <i>L. major</i> | 91  | 909  | 999  |
| LmjF01.0730 | <i>L. major</i> | 78  | 1229 | 1306 |
| LmjF01.0730 | <i>L. major</i> | 47  | 1324 | 1370 |
| LmjF01.0730 | <i>L. major</i> | 100 | 1699 | 1798 |
| LmjF01.0730 | <i>L. major</i> | 103 | 2085 | 2187 |
| LmjF01.0740 | <i>L. major</i> | 152 | 112  | 263  |
| LmjF01.0740 | <i>L. major</i> | 184 | 381  | 564  |
| LmjF01.0750 | <i>L. major</i> | 64  | 1    | 64   |
| LmjF01.0750 | <i>L. major</i> | 288 | 103  | 390  |
| LmjF01.0750 | <i>L. major</i> | 94  | 488  | 581  |
| LmjF01.0750 | <i>L. major</i> | 76  | 673  | 748  |
| LmjF01.0750 | <i>L. major</i> | 60  | 755  | 814  |
| LmjF01.0750 | <i>L. major</i> | 48  | 894  | 941  |
| LmjF01.0750 | <i>L. major</i> | 103 | 967  | 1069 |
| LmjF01.0750 | <i>L. major</i> | 43  | 1143 | 1185 |
| LmjF01.0750 | <i>L. major</i> | 66  | 1270 | 1335 |
| LmjF01.0760 | <i>L. major</i> | 54  | 182  | 235  |
| LmjF01.0790 | <i>L. major</i> | 161 | 1    | 161  |
| LmjF01.0790 | <i>L. major</i> | 210 | 181  | 390  |

|             |                 |     |      |      |
|-------------|-----------------|-----|------|------|
| LmjF01.0790 | <i>L. major</i> | 94  | 395  | 488  |
| LmjF01.0800 | <i>L. major</i> | 178 | 44   | 221  |
| LmjF01.0800 | <i>L. major</i> | 109 | 401  | 509  |
| LmjF01.0810 | <i>L. major</i> | 176 | 551  | 726  |
| LmjF01.0820 | <i>L. major</i> | 46  | 1    | 46   |
| LmjF01.0820 | <i>L. major</i> | 138 | 687  | 824  |
| LmjF01.0830 | <i>L. major</i> | 54  | 1    | 54   |
| LmjF01.0830 | <i>L. major</i> | 45  | 139  | 183  |
| LmjF01.0830 | <i>L. major</i> | 40  | 280  | 319  |
| LmjF02.0010 | <i>L. major</i> | 79  | 1    | 79   |
| LmjF02.0010 | <i>L. major</i> | 45  | 145  | 189  |
| LmjF02.0020 | <i>L. major</i> | 49  | 1    | 49   |
| LmjF02.0060 | <i>L. major</i> | 41  | 82   | 122  |
| LmjF02.0070 | <i>L. major</i> | 63  | 335  | 397  |
| LmjF02.0080 | <i>L. major</i> | 53  | 1    | 53   |
| LmjF02.0080 | <i>L. major</i> | 44  | 780  | 823  |
| LmjF02.0080 | <i>L. major</i> | 60  | 937  | 996  |
| LmjF02.0085 | <i>L. major</i> | 140 | 1    | 140  |
| LmjF02.0090 | <i>L. major</i> | 153 | 1    | 153  |
| LmjF02.0090 | <i>L. major</i> | 52  | 301  | 352  |
| LmjF02.0110 | <i>L. major</i> | 121 | 716  | 836  |
| LmjF02.0120 | <i>L. major</i> | 144 | 108  | 251  |
| LmjF02.0120 | <i>L. major</i> | 138 | 641  | 778  |
| LmjF02.0120 | <i>L. major</i> | 46  | 922  | 967  |
| LmjF02.0120 | <i>L. major</i> | 71  | 1415 | 1485 |
| LmjF02.0120 | <i>L. major</i> | 70  | 2055 | 2124 |
| LmjF02.0120 | <i>L. major</i> | 51  | 2167 | 2217 |
| LmjF02.0120 | <i>L. major</i> | 77  | 2616 | 2692 |
| LmjF02.0120 | <i>L. major</i> | 67  | 2700 | 2766 |
| LmjF02.0120 | <i>L. major</i> | 63  | 2930 | 2992 |
| LmjF02.0120 | <i>L. major</i> | 67  | 3076 | 3142 |
| LmjF02.0120 | <i>L. major</i> | 46  | 3290 | 3335 |
| LmjF02.0120 | <i>L. major</i> | 219 | 3522 | 3740 |
| LmjF02.0120 | <i>L. major</i> | 55  | 3875 | 3929 |
| LmjF02.0120 | <i>L. major</i> | 125 | 4106 | 4230 |
| LmjF02.0120 | <i>L. major</i> | 44  | 4822 | 4865 |
| LmjF02.0130 | <i>L. major</i> | 65  | 55   | 119  |
| LmjF02.0140 | <i>L. major</i> | 188 | 123  | 310  |
| LmjF02.0140 | <i>L. major</i> | 52  | 367  | 418  |
| LmjF02.0140 | <i>L. major</i> | 70  | 766  | 835  |
| LmjF02.0150 | <i>L. major</i> | 310 | 73   | 382  |
| LmjF02.0150 | <i>L. major</i> | 115 | 573  | 687  |
| LmjF02.0150 | <i>L. major</i> | 116 | 751  | 866  |
| LmjF02.0150 | <i>L. major</i> | 42  | 958  | 999  |
| LmjF02.0150 | <i>L. major</i> | 41  | 1052 | 1092 |
| LmjF02.0150 | <i>L. major</i> | 156 | 1106 | 1261 |
| LmjF02.0150 | <i>L. major</i> | 58  | 1447 | 1504 |

|             |                 |     |      |      |
|-------------|-----------------|-----|------|------|
| LmjF02.0150 | <i>L. major</i> | 166 | 1751 | 1916 |
| LmjF02.0160 | <i>L. major</i> | 57  | 32   | 88   |
| LmjF02.0160 | <i>L. major</i> | 46  | 345  | 390  |
| LmjF02.0160 | <i>L. major</i> | 46  | 345  | 390  |
| LmjF02.0170 | <i>L. major</i> | 46  | 373  | 418  |
| LmjF02.0180 | <i>L. major</i> | 66  | 1    | 66   |
| LmjF02.0190 | <i>L. major</i> | 223 | 211  | 433  |
| LmjF02.0190 | <i>L. major</i> | 47  | 530  | 576  |
| LmjF02.0190 | <i>L. major</i> | 53  | 750  | 802  |
| LmjF02.0190 | <i>L. major</i> | 49  | 921  | 969  |
| LmjF02.0210 | <i>L. major</i> | 46  | 373  | 418  |
| LmjF02.0210 | <i>L. major</i> | 42  | 587  | 628  |
| LmjF02.0210 | <i>L. major</i> | 42  | 587  | 628  |
| LmjF02.0220 | <i>L. major</i> | 66  | 1    | 66   |
| LmjF02.0230 | <i>L. major</i> | 224 | 21   | 244  |
| LmjF02.0230 | <i>L. major</i> | 47  | 341  | 387  |
| LmjF02.0230 | <i>L. major</i> | 53  | 561  | 613  |
| LmjF02.0230 | <i>L. major</i> | 49  | 732  | 780  |
| LmjF02.0240 | <i>L. major</i> | 59  | 102  | 160  |
| LmjF02.0240 | <i>L. major</i> | 53  | 234  | 286  |
| LmjF02.0240 | <i>L. major</i> | 42  | 336  | 377  |
| LmjF02.0250 | <i>L. major</i> | 56  | 1    | 56   |
| LmjF02.0250 | <i>L. major</i> | 51  | 616  | 666  |
| LmjF02.0250 | <i>L. major</i> | 45  | 669  | 713  |
| LmjF02.0250 | <i>L. major</i> | 43  | 857  | 899  |
| LmjF02.0250 | <i>L. major</i> | 40  | 996  | 1035 |
| LmjF02.0250 | <i>L. major</i> | 46  | 1062 | 1107 |
| LmjF02.0260 | <i>L. major</i> | 89  | 186  | 274  |
| LmjF02.0280 | <i>L. major</i> | 96  | 74   | 169  |
| LmjF02.0290 | <i>L. major</i> | 54  | 10   | 63   |
| LmjF02.0290 | <i>L. major</i> | 48  | 456  | 503  |
| LmjF02.0290 | <i>L. major</i> | 48  | 456  | 503  |
| LmjF02.0300 | <i>L. major</i> | 60  | 1    | 60   |
| LmjF02.0300 | <i>L. major</i> | 96  | 75   | 170  |
| LmjF02.0300 | <i>L. major</i> | 83  | 866  | 948  |
| LmjF02.0300 | <i>L. major</i> | 197 | 1275 | 1471 |
| LmjF02.0300 | <i>L. major</i> | 85  | 1919 | 2003 |
| LmjF02.0300 | <i>L. major</i> | 44  | 2347 | 2390 |
| LmjF02.0310 | <i>L. major</i> | 144 | 1    | 144  |
| LmjF02.0310 | <i>L. major</i> | 63  | 212  | 274  |
| LmjF02.0310 | <i>L. major</i> | 110 | 402  | 511  |
| LmjF02.0320 | <i>L. major</i> | 87  | 168  | 254  |
| LmjF02.0330 | <i>L. major</i> | 187 | 1    | 187  |
| LmjF02.0330 | <i>L. major</i> | 53  | 475  | 527  |
| LmjF02.0330 | <i>L. major</i> | 44  | 1128 | 1171 |
| LmjF02.0330 | <i>L. major</i> | 59  | 1305 | 1363 |
| LmjF02.0330 | <i>L. major</i> | 82  | 1393 | 1474 |

|             |                 |     |      |      |
|-------------|-----------------|-----|------|------|
| LmjF02.0340 | <i>L. major</i> | 47  | 1    | 47   |
| LmjF02.0340 | <i>L. major</i> | 43  | 106  | 148  |
| LmjF02.0340 | <i>L. major</i> | 64  | 161  | 224  |
| LmjF02.0340 | <i>L. major</i> | 138 | 293  | 430  |
| LmjF02.0340 | <i>L. major</i> | 42  | 543  | 584  |
| LmjF02.0340 | <i>L. major</i> | 86  | 679  | 764  |
| LmjF02.0340 | <i>L. major</i> | 56  | 834  | 889  |
| LmjF02.0350 | <i>L. major</i> | 310 | 1    | 310  |
| LmjF02.0350 | <i>L. major</i> | 49  | 339  | 387  |
| LmjF02.0350 | <i>L. major</i> | 52  | 412  | 463  |
| LmjF02.0350 | <i>L. major</i> | 65  | 688  | 752  |
| LmjF02.0350 | <i>L. major</i> | 109 | 885  | 993  |
| LmjF02.0370 | <i>L. major</i> | 55  | 473  | 527  |
| LmjF02.0380 | <i>L. major</i> | 43  | 123  | 165  |
| LmjF02.0380 | <i>L. major</i> | 64  | 262  | 325  |
| LmjF02.0380 | <i>L. major</i> | 72  | 388  | 459  |
| LmjF02.0410 | <i>L. major</i> | 56  | 1    | 56   |
| LmjF02.0410 | <i>L. major</i> | 197 | 94   | 290  |
| LmjF02.0410 | <i>L. major</i> | 112 | 300  | 411  |
| LmjF02.0410 | <i>L. major</i> | 84  | 438  | 521  |
| LmjF02.0410 | <i>L. major</i> | 42  | 550  | 591  |
| LmjF02.0410 | <i>L. major</i> | 74  | 618  | 691  |
| LmjF02.0410 | <i>L. major</i> | 66  | 788  | 853  |
| LmjF02.0420 | <i>L. major</i> | 94  | 201  | 294  |
| LmjF02.0420 | <i>L. major</i> | 73  | 395  | 467  |
| LmjF02.0420 | <i>L. major</i> | 156 | 513  | 668  |
| LmjF02.0420 | <i>L. major</i> | 59  | 942  | 1000 |
| LmjF02.0430 | <i>L. major</i> | 41  | 88   | 128  |
| LmjF02.0470 | <i>L. major</i> | 165 | 1    | 165  |
| LmjF02.0470 | <i>L. major</i> | 396 | 210  | 605  |
| LmjF02.0470 | <i>L. major</i> | 71  | 628  | 698  |
| LmjF02.0470 | <i>L. major</i> | 630 | 755  | 1384 |
| LmjF02.0470 | <i>L. major</i> | 710 | 1414 | 2123 |
| LmjF02.0470 | <i>L. major</i> | 183 | 2135 | 2317 |
| LmjF02.0470 | <i>L. major</i> | 478 | 2367 | 2844 |
| LmjF02.0470 | <i>L. major</i> | 158 | 2848 | 3005 |
| LmjF02.0470 | <i>L. major</i> | 123 | 3033 | 3155 |
| LmjF02.0480 | <i>L. major</i> | 187 | 1    | 187  |
| LmjF02.0490 | <i>L. major</i> | 149 | 79   | 227  |
| LmjF02.0490 | <i>L. major</i> | 75  | 249  | 323  |
| LmjF02.0490 | <i>L. major</i> | 87  | 388  | 474  |
| LmjF02.0490 | <i>L. major</i> | 43  | 502  | 544  |
| LmjF02.0490 | <i>L. major</i> | 105 | 554  | 658  |
| LmjF02.0500 | <i>L. major</i> | 99  | 1    | 99   |
| LmjF02.0500 | <i>L. major</i> | 54  | 137  | 190  |
| LmjF02.0500 | <i>L. major</i> | 64  | 511  | 574  |
| LmjF02.0500 | <i>L. major</i> | 50  | 670  | 719  |



|             |                 |     |      |      |
|-------------|-----------------|-----|------|------|
| LmjF02.0510 | <i>L. major</i> | 170 | 1    | 170  |
| LmjF02.0520 | <i>L. major</i> | 154 | 1    | 154  |
| LmjF02.0520 | <i>L. major</i> | 951 | 194  | 1144 |
| LmjF02.0520 | <i>L. major</i> | 598 | 1153 | 1750 |
| LmjF02.0520 | <i>L. major</i> | 123 | 1789 | 1911 |
| LmjF02.0530 | <i>L. major</i> | 131 | 61   | 191  |
| LmjF02.0530 | <i>L. major</i> | 107 | 223  | 329  |
| LmjF02.0530 | <i>L. major</i> | 403 | 365  | 767  |
| LmjF02.0540 | <i>L. major</i> | 50  | 210  | 259  |
| LmjF02.0550 | <i>L. major</i> | 76  | 30   | 105  |
| LmjF02.0560 | <i>L. major</i> | 59  | 1    | 59   |
| LmjF02.0560 | <i>L. major</i> | 95  | 323  | 417  |
| LmjF02.0560 | <i>L. major</i> | 83  | 440  | 522  |
| LmjF02.0560 | <i>L. major</i> | 298 | 552  | 849  |
| LmjF02.0570 | <i>L. major</i> | 297 | 1    | 297  |
| LmjF02.0570 | <i>L. major</i> | 92  | 329  | 420  |
| LmjF02.0570 | <i>L. major</i> | 69  | 642  | 710  |
| LmjF02.0570 | <i>L. major</i> | 164 | 714  | 877  |
| LmjF02.0570 | <i>L. major</i> | 41  | 1002 | 1042 |
| LmjF02.0570 | <i>L. major</i> | 53  | 1070 | 1122 |
| LmjF02.0570 | <i>L. major</i> | 70  | 1355 | 1424 |
| LmjF02.0580 | <i>L. major</i> | 55  | 826  | 880  |
| LmjF02.0580 | <i>L. major</i> | 88  | 926  | 1013 |
| LmjF02.0580 | <i>L. major</i> | 102 | 1101 | 1202 |
| LmjF02.0580 | <i>L. major</i> | 51  | 1626 | 1676 |
| LmjF02.0580 | <i>L. major</i> | 99  | 1779 | 1877 |
| LmjF02.0580 | <i>L. major</i> | 179 | 2049 | 2227 |
| LmjF02.0580 | <i>L. major</i> | 51  | 2239 | 2289 |
| LmjF02.0580 | <i>L. major</i> | 56  | 2434 | 2489 |
| LmjF02.0580 | <i>L. major</i> | 154 | 2567 | 2720 |
| LmjF02.0580 | <i>L. major</i> | 112 | 2955 | 3066 |
| LmjF02.0580 | <i>L. major</i> | 59  | 3154 | 3212 |
| LmjF02.0580 | <i>L. major</i> | 54  | 3329 | 3382 |
| LmjF02.0580 | <i>L. major</i> | 275 | 3411 | 3685 |
| LmjF02.0590 | <i>L. major</i> | 138 | 1    | 138  |
| LmjF02.0590 | <i>L. major</i> | 89  | 258  | 346  |
| LmjF02.0590 | <i>L. major</i> | 138 | 378  | 515  |
| LmjF02.0610 | <i>L. major</i> | 69  | 1    | 69   |
| LmjF02.0610 | <i>L. major</i> | 191 | 106  | 296  |
| LmjF02.0620 | <i>L. major</i> | 140 | 1    | 140  |
| LmjF02.0630 | <i>L. major</i> | 201 | 42   | 242  |
| LmjF02.0630 | <i>L. major</i> | 50  | 287  | 336  |
| LmjF02.0640 | <i>L. major</i> | 64  | 112  | 175  |
| LmjF02.0640 | <i>L. major</i> | 150 | 274  | 423  |
| LmjF02.0640 | <i>L. major</i> | 121 | 516  | 636  |
| LmjF02.0640 | <i>L. major</i> | 42  | 1100 | 1141 |
| LmjF02.0640 | <i>L. major</i> | 49  | 1207 | 1255 |

|             |                 |     |      |      |
|-------------|-----------------|-----|------|------|
| LmjF02.0640 | <i>L. major</i> | 42  | 1355 | 1396 |
| LmjF02.0650 | <i>L. major</i> | 49  | 1    | 49   |
| LmjF02.0650 | <i>L. major</i> | 86  | 122  | 207  |
| LmjF02.0650 | <i>L. major</i> | 41  | 246  | 286  |
| LmjF02.0660 | <i>L. major</i> | 251 | 1    | 251  |
| LmjF02.0660 | <i>L. major</i> | 278 | 261  | 538  |
| LmjF02.0660 | <i>L. major</i> | 144 | 787  | 930  |
| LmjF02.0690 | <i>L. major</i> | 134 | 1    | 134  |
| LmjF02.0690 | <i>L. major</i> | 101 | 150  | 250  |
| LmjF02.0690 | <i>L. major</i> | 77  | 346  | 422  |
| LmjF02.0700 | <i>L. major</i> | 54  | 1    | 54   |
| LmjF02.0700 | <i>L. major</i> | 162 | 116  | 277  |
| LmjF02.0700 | <i>L. major</i> | 62  | 280  | 341  |
| LmjF02.0700 | <i>L. major</i> | 75  | 350  | 424  |
| LmjF02.0700 | <i>L. major</i> | 120 | 595  | 714  |
| LmjF02.0700 | <i>L. major</i> | 157 | 781  | 937  |
| LmjF02.0710 | <i>L. major</i> | 102 | 1    | 102  |
| LmjF02.0710 | <i>L. major</i> | 88  | 335  | 422  |
| LmjF02.0710 | <i>L. major</i> | 88  | 335  | 422  |
| LmjF02.0740 | <i>L. major</i> | 53  | 1    | 53   |
| LmjF03.0020 | <i>L. major</i> | 41  | 68   | 108  |
| LmjF03.0070 | <i>L. major</i> | 43  | 107  | 149  |
| LmjF03.0090 | <i>L. major</i> | 49  | 86   | 134  |
| LmjF03.0090 | <i>L. major</i> | 40  | 528  | 567  |
| LmjF03.0090 | <i>L. major</i> | 40  | 528  | 567  |
| LmjF03.0110 | <i>L. major</i> | 57  | 16   | 72   |
| LmjF03.0110 | <i>L. major</i> | 347 | 237  | 583  |
| LmjF03.0110 | <i>L. major</i> | 92  | 660  | 751  |
| LmjF03.0110 | <i>L. major</i> | 74  | 774  | 847  |
| LmjF03.0110 | <i>L. major</i> | 62  | 894  | 955  |
| LmjF03.0120 | <i>L. major</i> | 487 | 203  | 689  |
| LmjF03.0120 | <i>L. major</i> | 47  | 717  | 763  |
| LmjF03.0120 | <i>L. major</i> | 115 | 777  | 891  |
| LmjF03.0140 | <i>L. major</i> | 95  | 45   | 139  |
| LmjF03.0160 | <i>L. major</i> | 89  | 90   | 178  |
| LmjF03.0160 | <i>L. major</i> | 42  | 438  | 479  |
| LmjF03.0160 | <i>L. major</i> | 42  | 438  | 479  |
| LmjF03.0170 | <i>L. major</i> | 57  | 43   | 99   |
| LmjF03.0170 | <i>L. major</i> | 74  | 119  | 192  |
| LmjF03.0180 | <i>L. major</i> | 246 | 31   | 276  |
| LmjF03.0180 | <i>L. major</i> | 46  | 419  | 464  |
| LmjF03.0180 | <i>L. major</i> | 46  | 419  | 464  |
| LmjF03.0190 | <i>L. major</i> | 50  | 161  | 210  |
| LmjF03.0220 | <i>L. major</i> | 45  | 45   | 89   |
| LmjF03.0230 | <i>L. major</i> | 67  | 21   | 87   |
| LmjF03.0260 | <i>L. major</i> | 57  | 34   | 90   |
| LmjF03.0260 | <i>L. major</i> | 61  | 125  | 185  |

|             |                 |      |      |      |
|-------------|-----------------|------|------|------|
| LmjF03.0260 | <i>L. major</i> | 61   | 125  | 185  |
| LmjF03.0270 | <i>L. major</i> | 2170 | 82   | 2251 |
| LmjF03.0270 | <i>L. major</i> | 69   | 2286 | 2354 |
| LmjF03.0280 | <i>L. major</i> | 65   | 45   | 109  |
| LmjF03.0280 | <i>L. major</i> | 48   | 227  | 274  |
| LmjF03.0280 | <i>L. major</i> | 150  | 291  | 440  |
| LmjF03.0280 | <i>L. major</i> | 49   | 497  | 545  |
| LmjF03.0280 | <i>L. major</i> | 84   | 623  | 706  |
| LmjF03.0280 | <i>L. major</i> | 100  | 778  | 877  |
| LmjF03.0310 | <i>L. major</i> | 105  | 1    | 105  |
| LmjF03.0310 | <i>L. major</i> | 693  | 143  | 835  |
| LmjF03.0310 | <i>L. major</i> | 1066 | 851  | 1916 |
| LmjF03.0310 | <i>L. major</i> | 151  | 1937 | 2087 |
| LmjF03.0320 | <i>L. major</i> | 46   | 1    | 46   |
| LmjF03.0320 | <i>L. major</i> | 114  | 61   | 174  |
| LmjF03.0320 | <i>L. major</i> | 451  | 182  | 632  |
| LmjF03.0320 | <i>L. major</i> | 269  | 764  | 1032 |
| LmjF03.0330 | <i>L. major</i> | 41   | 1    | 41   |
| LmjF03.0330 | <i>L. major</i> | 83   | 192  | 274  |
| LmjF03.0330 | <i>L. major</i> | 90   | 312  | 401  |
| LmjF03.0330 | <i>L. major</i> | 45   | 586  | 630  |
| LmjF03.0340 | <i>L. major</i> | 232  | 66   | 297  |
| LmjF03.0350 | <i>L. major</i> | 355  | 1    | 355  |
| LmjF03.0350 | <i>L. major</i> | 63   | 421  | 483  |
| LmjF03.0350 | <i>L. major</i> | 278  | 529  | 806  |
| LmjF03.0350 | <i>L. major</i> | 51   | 983  | 1033 |
| LmjF03.0350 | <i>L. major</i> | 73   | 1056 | 1128 |
| LmjF03.0350 | <i>L. major</i> | 90   | 1159 | 1248 |
| LmjF03.0350 | <i>L. major</i> | 208  | 1320 | 1527 |
| LmjF03.0360 | <i>L. major</i> | 313  | 1    | 313  |
| LmjF03.0360 | <i>L. major</i> | 196  | 315  | 510  |
| LmjF03.0360 | <i>L. major</i> | 957  | 519  | 1475 |
| LmjF03.0360 | <i>L. major</i> | 173  | 1488 | 1660 |
| LmjF03.0370 | <i>L. major</i> | 50   | 1    | 50   |
| LmjF03.0370 | <i>L. major</i> | 64   | 59   | 122  |
| LmjF03.0370 | <i>L. major</i> | 64   | 59   | 122  |
| LmjF03.0380 | <i>L. major</i> | 128  | 1    | 128  |
| LmjF03.0390 | <i>L. major</i> | 86   | 1    | 86   |
| LmjF03.0390 | <i>L. major</i> | 59   | 185  | 243  |
| LmjF03.0390 | <i>L. major</i> | 45   | 393  | 437  |
| LmjF03.0410 | <i>L. major</i> | 64   | 1    | 64   |
| LmjF03.0410 | <i>L. major</i> | 111  | 283  | 393  |
| LmjF03.0410 | <i>L. major</i> | 46   | 638  | 683  |
| LmjF03.0420 | <i>L. major</i> | 46   | 1    | 46   |
| LmjF03.0420 | <i>L. major</i> | 164  | 59   | 222  |
| LmjF03.0420 | <i>L. major</i> | 95   | 229  | 323  |
| LmjF03.0420 | <i>L. major</i> | 89   | 339  | 427  |

|             |                 |     |      |      |
|-------------|-----------------|-----|------|------|
| LmjF03.0420 | <i>L. major</i> | 147 | 435  | 581  |
| LmjF03.0420 | <i>L. major</i> | 43  | 612  | 654  |
| LmjF03.0420 | <i>L. major</i> | 56  | 752  | 807  |
| LmjF03.0420 | <i>L. major</i> | 60  | 932  | 991  |
| LmjF03.0420 | <i>L. major</i> | 219 | 1288 | 1506 |
| LmjF03.0420 | <i>L. major</i> | 90  | 1627 | 1716 |
| LmjF03.0430 | <i>L. major</i> | 61  | 51   | 111  |
| LmjF03.0440 | <i>L. major</i> | 61  | 51   | 111  |
| LmjF03.0450 | <i>L. major</i> | 52  | 1    | 52   |
| LmjF03.0450 | <i>L. major</i> | 111 | 111  | 221  |
| LmjF03.0450 | <i>L. major</i> | 102 | 254  | 355  |
| LmjF03.0450 | <i>L. major</i> | 93  | 410  | 502  |
| LmjF03.0450 | <i>L. major</i> | 41  | 530  | 570  |
| LmjF03.0450 | <i>L. major</i> | 45  | 684  | 728  |
| LmjF03.0450 | <i>L. major</i> | 81  | 808  | 888  |
| LmjF03.0450 | <i>L. major</i> | 220 | 910  | 1129 |
| LmjF03.0450 | <i>L. major</i> | 45  | 1196 | 1240 |
| LmjF03.0450 | <i>L. major</i> | 80  | 1275 | 1354 |
| LmjF03.0450 | <i>L. major</i> | 47  | 1384 | 1430 |
| LmjF03.0450 | <i>L. major</i> | 49  | 1508 | 1556 |
| LmjF03.0460 | <i>L. major</i> | 404 | 1    | 404  |
| LmjF03.0460 | <i>L. major</i> | 117 | 422  | 538  |
| LmjF03.0460 | <i>L. major</i> | 65  | 569  | 633  |
| LmjF03.0460 | <i>L. major</i> | 64  | 668  | 731  |
| LmjF03.0460 | <i>L. major</i> | 46  | 774  | 819  |
| LmjF03.0460 | <i>L. major</i> | 62  | 838  | 899  |
| LmjF03.0460 | <i>L. major</i> | 149 | 914  | 1062 |
| LmjF03.0470 | <i>L. major</i> | 53  | 1    | 53   |
| LmjF03.0470 | <i>L. major</i> | 103 | 93   | 195  |
| LmjF03.0470 | <i>L. major</i> | 46  | 266  | 311  |
| LmjF03.0470 | <i>L. major</i> | 47  | 389  | 435  |
| LmjF03.0470 | <i>L. major</i> | 48  | 467  | 514  |
| LmjF03.0470 | <i>L. major</i> | 52  | 535  | 586  |
| LmjF03.0490 | <i>L. major</i> | 68  | 25   | 92   |
| LmjF03.0490 | <i>L. major</i> | 267 | 121  | 387  |
| LmjF03.0490 | <i>L. major</i> | 181 | 405  | 585  |
| LmjF03.0490 | <i>L. major</i> | 93  | 595  | 687  |
| LmjF03.0490 | <i>L. major</i> | 65  | 958  | 1022 |
| LmjF03.0500 | <i>L. major</i> | 122 | 252  | 373  |
| LmjF03.0510 | <i>L. major</i> | 170 | 1    | 170  |
| LmjF03.0510 | <i>L. major</i> | 155 | 196  | 350  |
| LmjF03.0510 | <i>L. major</i> | 737 | 364  | 1100 |
| LmjF03.0510 | <i>L. major</i> | 253 | 1142 | 1394 |
| LmjF03.0510 | <i>L. major</i> | 120 | 1418 | 1537 |
| LmjF03.0510 | <i>L. major</i> | 118 | 1581 | 1698 |
| LmjF03.0510 | <i>L. major</i> | 47  | 1753 | 1799 |
| LmjF03.0510 | <i>L. major</i> | 47  | 1827 | 1873 |

|             |                 |     |      |      |
|-------------|-----------------|-----|------|------|
| LmjF03.0510 | <i>L. major</i> | 200 | 1961 | 2160 |
| LmjF03.0510 | <i>L. major</i> | 49  | 2239 | 2287 |
| LmjF03.0510 | <i>L. major</i> | 63  | 2384 | 2446 |
| LmjF03.0520 | <i>L. major</i> | 353 | 1    | 353  |
| LmjF03.0520 | <i>L. major</i> | 48  | 536  | 583  |
| LmjF03.0520 | <i>L. major</i> | 46  | 655  | 700  |
| LmjF03.0530 | <i>L. major</i> | 41  | 33   | 73   |
| LmjF03.0530 | <i>L. major</i> | 106 | 149  | 254  |
| LmjF03.0530 | <i>L. major</i> | 95  | 304  | 398  |
| LmjF03.0530 | <i>L. major</i> | 69  | 474  | 542  |
| LmjF03.0530 | <i>L. major</i> | 40  | 819  | 858  |
| LmjF03.0530 | <i>L. major</i> | 90  | 994  | 1083 |
| LmjF03.0530 | <i>L. major</i> | 47  | 1133 | 1179 |
| LmjF03.0530 | <i>L. major</i> | 56  | 1190 | 1245 |
| LmjF03.0530 | <i>L. major</i> | 68  | 1289 | 1356 |
| LmjF03.0530 | <i>L. major</i> | 56  | 1406 | 1461 |
| LmjF03.0530 | <i>L. major</i> | 118 | 1480 | 1597 |
| LmjF03.0530 | <i>L. major</i> | 96  | 1684 | 1779 |
| LmjF03.0530 | <i>L. major</i> | 132 | 1819 | 1950 |
| LmjF03.0540 | <i>L. major</i> | 49  | 1    | 49   |
| LmjF03.0550 | <i>L. major</i> | 72  | 145  | 216  |
| LmjF03.0550 | <i>L. major</i> | 74  | 339  | 412  |
| LmjF03.0550 | <i>L. major</i> | 54  | 451  | 504  |
| LmjF03.0550 | <i>L. major</i> | 340 | 613  | 952  |
| LmjF03.0550 | <i>L. major</i> | 86  | 1153 | 1238 |
| LmjF03.0560 | <i>L. major</i> | 117 | 1    | 117  |
| LmjF03.0560 | <i>L. major</i> | 257 | 140  | 396  |
| LmjF03.0560 | <i>L. major</i> | 69  | 471  | 539  |
| LmjF03.0560 | <i>L. major</i> | 46  | 573  | 618  |
| LmjF03.0580 | <i>L. major</i> | 99  | 80   | 178  |
| LmjF03.0590 | <i>L. major</i> | 96  | 17   | 112  |
| LmjF03.0590 | <i>L. major</i> | 235 | 127  | 361  |
| LmjF03.0590 | <i>L. major</i> | 88  | 469  | 556  |
| LmjF03.0590 | <i>L. major</i> | 42  | 638  | 679  |
| LmjF03.0590 | <i>L. major</i> | 107 | 728  | 834  |
| LmjF03.0590 | <i>L. major</i> | 85  | 1112 | 1196 |
| LmjF03.0600 | <i>L. major</i> | 51  | 1    | 51   |
| LmjF03.0620 | <i>L. major</i> | 56  | 136  | 191  |
| LmjF03.0620 | <i>L. major</i> | 54  | 549  | 602  |
| LmjF03.0630 | <i>L. major</i> | 77  | 67   | 143  |
| LmjF03.0630 | <i>L. major</i> | 42  | 182  | 223  |
| LmjF03.0630 | <i>L. major</i> | 42  | 182  | 223  |
| LmjF03.0640 | <i>L. major</i> | 59  | 52   | 110  |
| LmjF03.0640 | <i>L. major</i> | 56  | 214  | 269  |
| LmjF03.0650 | <i>L. major</i> | 147 | 1    | 147  |
| LmjF03.0650 | <i>L. major</i> | 41  | 160  | 200  |
| LmjF03.0650 | <i>L. major</i> | 70  | 222  | 291  |

|             |                 |     |      |      |
|-------------|-----------------|-----|------|------|
| LmjF03.0650 | <i>L. major</i> | 81  | 575  | 655  |
| LmjF03.0650 | <i>L. major</i> | 81  | 813  | 893  |
| LmjF03.0660 | <i>L. major</i> | 91  | 7    | 97   |
| LmjF03.0660 | <i>L. major</i> | 170 | 402  | 571  |
| LmjF03.0690 | <i>L. major</i> | 40  | 32   | 71   |
| LmjF03.0690 | <i>L. major</i> | 68  | 284  | 351  |
| LmjF03.0690 | <i>L. major</i> | 89  | 685  | 773  |
| LmjF03.0690 | <i>L. major</i> | 58  | 1447 | 1504 |
| LmjF03.0690 | <i>L. major</i> | 66  | 1552 | 1617 |
| LmjF03.0700 | <i>L. major</i> | 222 | 68   | 289  |
| LmjF03.0700 | <i>L. major</i> | 114 | 396  | 509  |
| LmjF03.0700 | <i>L. major</i> | 49  | 521  | 569  |
| LmjF03.0700 | <i>L. major</i> | 86  | 589  | 674  |
| LmjF03.0700 | <i>L. major</i> | 50  | 714  | 763  |
| LmjF03.0700 | <i>L. major</i> | 45  | 798  | 842  |
| LmjF03.0700 | <i>L. major</i> | 80  | 897  | 976  |
| LmjF03.0700 | <i>L. major</i> | 63  | 992  | 1054 |
| LmjF03.0700 | <i>L. major</i> | 51  | 1134 | 1184 |
| LmjF03.0700 | <i>L. major</i> | 96  | 1287 | 1382 |
| LmjF03.0700 | <i>L. major</i> | 66  | 1431 | 1496 |
| LmjF03.0700 | <i>L. major</i> | 74  | 1709 | 1782 |
| LmjF03.0700 | <i>L. major</i> | 59  | 1907 | 1965 |
| LmjF03.0700 | <i>L. major</i> | 55  | 2054 | 2108 |
| LmjF03.0700 | <i>L. major</i> | 99  | 2121 | 2219 |
| LmjF03.0700 | <i>L. major</i> | 55  | 2274 | 2328 |
| LmjF03.0700 | <i>L. major</i> | 112 | 2344 | 2455 |
| LmjF03.0700 | <i>L. major</i> | 51  | 2549 | 2599 |
| LmjF03.0710 | <i>L. major</i> | 60  | 47   | 106  |
| LmjF03.0720 | <i>L. major</i> | 47  | 10   | 56   |
| LmjF03.0720 | <i>L. major</i> | 57  | 86   | 142  |
| LmjF03.0720 | <i>L. major</i> | 145 | 415  | 559  |
| LmjF03.0720 | <i>L. major</i> | 90  | 784  | 873  |
| LmjF03.0730 | <i>L. major</i> | 56  | 1    | 56   |
| LmjF03.0730 | <i>L. major</i> | 91  | 113  | 203  |
| LmjF03.0730 | <i>L. major</i> | 61  | 302  | 362  |
| LmjF03.0750 | <i>L. major</i> | 81  | 1    | 81   |
| LmjF03.0750 | <i>L. major</i> | 54  | 367  | 420  |
| LmjF03.0750 | <i>L. major</i> | 252 | 504  | 755  |
| LmjF03.0760 | <i>L. major</i> | 90  | 1    | 90   |
| LmjF03.0760 | <i>L. major</i> | 46  | 152  | 197  |
| LmjF03.0770 | <i>L. major</i> | 41  | 178  | 218  |
| LmjF03.0780 | <i>L. major</i> | 232 | 10   | 241  |
| LmjF03.0780 | <i>L. major</i> | 629 | 356  | 984  |
| LmjF03.0780 | <i>L. major</i> | 50  | 1094 | 1143 |
| LmjF03.0780 | <i>L. major</i> | 140 | 1209 | 1348 |
| LmjF03.0780 | <i>L. major</i> | 118 | 1360 | 1477 |
| LmjF03.0780 | <i>L. major</i> | 64  | 1555 | 1618 |

|             |                 |     |      |      |
|-------------|-----------------|-----|------|------|
| LmjF03.0780 | <i>L. major</i> | 149 | 1657 | 1805 |
| LmjF03.0780 | <i>L. major</i> | 901 | 1821 | 2721 |
| LmjF03.0780 | <i>L. major</i> | 41  | 2755 | 2795 |
| LmjF03.0780 | <i>L. major</i> | 298 | 2815 | 3112 |
| LmjF03.0790 | <i>L. major</i> | 115 | 1    | 115  |
| LmjF03.0790 | <i>L. major</i> | 134 | 257  | 390  |
| LmjF03.0800 | <i>L. major</i> | 631 | 1    | 631  |
| LmjF03.0800 | <i>L. major</i> | 146 | 642  | 787  |
| LmjF03.0800 | <i>L. major</i> | 65  | 790  | 854  |
| LmjF03.0800 | <i>L. major</i> | 150 | 997  | 1146 |
| LmjF03.0800 | <i>L. major</i> | 158 | 1165 | 1322 |
| LmjF03.0800 | <i>L. major</i> | 45  | 1328 | 1372 |
| LmjF03.0800 | <i>L. major</i> | 126 | 1401 | 1526 |
| LmjF03.0800 | <i>L. major</i> | 199 | 1547 | 1745 |
| LmjF03.0800 | <i>L. major</i> | 96  | 2044 | 2139 |
| LmjF03.0800 | <i>L. major</i> | 71  | 2178 | 2248 |
| LmjF03.0800 | <i>L. major</i> | 68  | 2355 | 2422 |
| LmjF03.0810 | <i>L. major</i> | 317 | 1    | 317  |
| LmjF03.0810 | <i>L. major</i> | 50  | 347  | 396  |
| LmjF03.0810 | <i>L. major</i> | 124 | 557  | 680  |
| LmjF03.0810 | <i>L. major</i> | 61  | 731  | 791  |
| LmjF03.0820 | <i>L. major</i> | 651 | 1    | 651  |
| LmjF03.0820 | <i>L. major</i> | 131 | 654  | 784  |
| LmjF03.0820 | <i>L. major</i> | 880 | 816  | 1695 |
| LmjF03.0820 | <i>L. major</i> | 139 | 1843 | 1981 |
| LmjF03.0820 | <i>L. major</i> | 187 | 2024 | 2210 |
| LmjF03.0820 | <i>L. major</i> | 259 | 2232 | 2490 |
| LmjF03.0820 | <i>L. major</i> | 438 | 2499 | 2936 |
| LmjF03.0830 | <i>L. major</i> | 58  | 1    | 58   |
| LmjF03.0830 | <i>L. major</i> | 65  | 110  | 174  |
| LmjF03.0830 | <i>L. major</i> | 65  | 110  | 174  |
| LmjF03.0840 | <i>L. major</i> | 87  | 56   | 142  |
| LmjF03.0840 | <i>L. major</i> | 71  | 228  | 298  |
| LmjF03.0840 | <i>L. major</i> | 76  | 494  | 569  |
| LmjF03.0840 | <i>L. major</i> | 42  | 707  | 748  |
| LmjF03.0840 | <i>L. major</i> | 112 | 863  | 974  |
| LmjF03.0850 | <i>L. major</i> | 99  | 1    | 99   |
| LmjF03.0850 | <i>L. major</i> | 537 | 114  | 650  |
| LmjF03.0850 | <i>L. major</i> | 263 | 681  | 943  |
| LmjF03.0850 | <i>L. major</i> | 85  | 949  | 1033 |
| LmjF03.0850 | <i>L. major</i> | 87  | 1066 | 1152 |
| LmjF03.0850 | <i>L. major</i> | 80  | 1212 | 1291 |
| LmjF03.0850 | <i>L. major</i> | 590 | 1305 | 1894 |
| LmjF03.0850 | <i>L. major</i> | 60  | 1902 | 1961 |
| LmjF03.0850 | <i>L. major</i> | 79  | 1992 | 2070 |
| LmjF03.0850 | <i>L. major</i> | 303 | 2080 | 2382 |
| LmjF03.0860 | <i>L. major</i> | 140 | 54   | 193  |

|             |                 |     |      |      |
|-------------|-----------------|-----|------|------|
| LmjF03.0860 | <i>L. major</i> | 64  | 226  | 289  |
| LmjF03.0860 | <i>L. major</i> | 55  | 393  | 447  |
| LmjF03.0860 | <i>L. major</i> | 89  | 727  | 815  |
| LmjF03.0860 | <i>L. major</i> | 40  | 874  | 913  |
| LmjF03.0860 | <i>L. major</i> | 43  | 1053 | 1095 |
| LmjF03.0860 | <i>L. major</i> | 60  | 1105 | 1164 |
| LmjF03.0870 | <i>L. major</i> | 260 | 161  | 420  |
| LmjF03.0870 | <i>L. major</i> | 604 | 673  | 1276 |
| LmjF03.0880 | <i>L. major</i> | 125 | 1    | 125  |
| LmjF03.0880 | <i>L. major</i> | 84  | 251  | 334  |
| LmjF03.0880 | <i>L. major</i> | 42  | 500  | 541  |
| LmjF03.0880 | <i>L. major</i> | 83  | 637  | 719  |
| LmjF03.0880 | <i>L. major</i> | 111 | 796  | 906  |
| LmjF03.0880 | <i>L. major</i> | 64  | 1332 | 1395 |
| LmjF03.0880 | <i>L. major</i> | 45  | 1809 | 1853 |
| LmjF03.0890 | <i>L. major</i> | 82  | 61   | 142  |
| LmjF03.0890 | <i>L. major</i> | 104 | 180  | 283  |
| LmjF03.0890 | <i>L. major</i> | 136 | 415  | 550  |
| LmjF03.0890 | <i>L. major</i> | 108 | 603  | 710  |
| LmjF03.0900 | <i>L. major</i> | 81  | 294  | 374  |
| LmjF03.0940 | <i>L. major</i> | 144 | 1    | 144  |
| LmjF03.0980 | <i>L. major</i> | 60  | 373  | 432  |
| LmjF04.0030 | <i>L. major</i> | 45  | 66   | 110  |
| LmjF04.0030 | <i>L. major</i> | 81  | 477  | 557  |
| LmjF04.0030 | <i>L. major</i> | 54  | 672  | 725  |
| LmjF04.0040 | <i>L. major</i> | 40  | 1    | 40   |
| LmjF04.0040 | <i>L. major</i> | 90  | 44   | 133  |
| LmjF04.0040 | <i>L. major</i> | 41  | 399  | 439  |
| LmjF04.0050 | <i>L. major</i> | 182 | 1    | 182  |
| LmjF04.0050 | <i>L. major</i> | 149 | 214  | 362  |
| LmjF04.0050 | <i>L. major</i> | 121 | 396  | 516  |
| LmjF04.0060 | <i>L. major</i> | 201 | 1    | 201  |
| LmjF04.0080 | <i>L. major</i> | 135 | 24   | 158  |
| LmjF04.0090 | <i>L. major</i> | 88  | 1    | 88   |
| LmjF04.0090 | <i>L. major</i> | 40  | 1112 | 1151 |
| LmjF04.0090 | <i>L. major</i> | 55  | 1336 | 1390 |
| LmjF04.0100 | <i>L. major</i> | 112 | 207  | 318  |
| LmjF04.0100 | <i>L. major</i> | 130 | 450  | 579  |
| LmjF04.0110 | <i>L. major</i> | 65  | 81   | 145  |
| LmjF04.0110 | <i>L. major</i> | 156 | 192  | 347  |
| LmjF04.0123 | <i>L. major</i> | 136 | 23   | 158  |
| LmjF04.0127 | <i>L. major</i> | 82  | 1    | 82   |
| LmjF04.0127 | <i>L. major</i> | 156 | 116  | 271  |
| LmjF04.0127 | <i>L. major</i> | 61  | 330  | 390  |
| LmjF04.0130 | <i>L. major</i> | 63  | 51   | 113  |
| LmjF04.0130 | <i>L. major</i> | 66  | 356  | 421  |
| LmjF04.0130 | <i>L. major</i> | 64  | 434  | 497  |



|             |                 |     |      |      |
|-------------|-----------------|-----|------|------|
| LmjF04.0140 | <i>L. major</i> | 52  | 51   | 102  |
| LmjF04.0140 | <i>L. major</i> | 66  | 356  | 421  |
| LmjF04.0140 | <i>L. major</i> | 64  | 434  | 497  |
| LmjF04.0150 | <i>L. major</i> | 52  | 51   | 102  |
| LmjF04.0150 | <i>L. major</i> | 66  | 356  | 421  |
| LmjF04.0150 | <i>L. major</i> | 64  | 434  | 497  |
| LmjF04.0160 | <i>L. major</i> | 52  | 51   | 102  |
| LmjF04.0160 | <i>L. major</i> | 66  | 356  | 421  |
| LmjF04.0160 | <i>L. major</i> | 64  | 434  | 497  |
| LmjF04.0170 | <i>L. major</i> | 52  | 51   | 102  |
| LmjF04.0170 | <i>L. major</i> | 66  | 356  | 421  |
| LmjF04.0170 | <i>L. major</i> | 64  | 434  | 497  |
| LmjF04.0180 | <i>L. major</i> | 96  | 159  | 254  |
| LmjF04.0180 | <i>L. major</i> | 85  | 336  | 420  |
| LmjF04.0180 | <i>L. major</i> | 85  | 336  | 420  |
| LmjF04.0190 | <i>L. major</i> | 114 | 383  | 496  |
| LmjF04.0190 | <i>L. major</i> | 85  | 541  | 625  |
| LmjF04.0190 | <i>L. major</i> | 85  | 541  | 625  |
| LmjF04.0200 | <i>L. major</i> | 104 | 1    | 104  |
| LmjF04.0210 | <i>L. major</i> | 117 | 120  | 236  |
| LmjF04.0220 | <i>L. major</i> | 62  | 293  | 354  |
| LmjF04.0230 | <i>L. major</i> | 63  | 104  | 166  |
| LmjF04.0230 | <i>L. major</i> | 69  | 190  | 258  |
| LmjF04.0240 | <i>L. major</i> | 99  | 1    | 99   |
| LmjF04.0250 | <i>L. major</i> | 92  | 1    | 92   |
| LmjF04.0250 | <i>L. major</i> | 74  | 132  | 205  |
| LmjF04.0250 | <i>L. major</i> | 127 | 360  | 486  |
| LmjF04.0250 | <i>L. major</i> | 61  | 655  | 715  |
| LmjF04.0250 | <i>L. major</i> | 58  | 794  | 851  |
| LmjF04.0250 | <i>L. major</i> | 72  | 1017 | 1088 |
| LmjF04.0250 | <i>L. major</i> | 106 | 1213 | 1318 |
| LmjF04.0260 | <i>L. major</i> | 42  | 1    | 42   |
| LmjF04.0260 | <i>L. major</i> | 62  | 74   | 135  |
| LmjF04.0260 | <i>L. major</i> | 62  | 74   | 135  |
| LmjF04.0270 | <i>L. major</i> | 81  | 65   | 145  |
| LmjF04.0270 | <i>L. major</i> | 51  | 240  | 290  |
| LmjF04.0270 | <i>L. major</i> | 51  | 240  | 290  |
| LmjF04.0280 | <i>L. major</i> | 122 | 129  | 250  |
| LmjF04.0280 | <i>L. major</i> | 73  | 310  | 382  |
| LmjF04.0280 | <i>L. major</i> | 44  | 684  | 727  |
| LmjF04.0280 | <i>L. major</i> | 60  | 1059 | 1118 |
| LmjF04.0280 | <i>L. major</i> | 81  | 1165 | 1245 |
| LmjF04.0280 | <i>L. major</i> | 48  | 1407 | 1454 |
| LmjF04.0280 | <i>L. major</i> | 231 | 1863 | 2093 |
| LmjF04.0320 | <i>L. major</i> | 40  | 1    | 40   |
| LmjF04.0330 | <i>L. major</i> | 59  | 1    | 59   |
| LmjF04.0330 | <i>L. major</i> | 41  | 92   | 132  |

|             |                 |     |      |      |
|-------------|-----------------|-----|------|------|
| LmjF04.0330 | <i>L. major</i> | 55  | 373  | 427  |
| LmjF04.0330 | <i>L. major</i> | 41  | 438  | 478  |
| LmjF04.0350 | <i>L. major</i> | 305 | 1    | 305  |
| LmjF04.0350 | <i>L. major</i> | 344 | 385  | 728  |
| LmjF04.0350 | <i>L. major</i> | 83  | 736  | 818  |
| LmjF04.0350 | <i>L. major</i> | 86  | 831  | 916  |
| LmjF04.0350 | <i>L. major</i> | 50  | 919  | 968  |
| LmjF04.0350 | <i>L. major</i> | 97  | 1012 | 1108 |
| LmjF04.0350 | <i>L. major</i> | 203 | 1207 | 1409 |
| LmjF04.0350 | <i>L. major</i> | 60  | 1489 | 1548 |
| LmjF04.0350 | <i>L. major</i> | 55  | 1627 | 1681 |
| LmjF04.0350 | <i>L. major</i> | 47  | 1797 | 1843 |
| LmjF04.0350 | <i>L. major</i> | 57  | 2050 | 2106 |
| LmjF04.0370 | <i>L. major</i> | 65  | 1    | 65   |
| LmjF04.0370 | <i>L. major</i> | 103 | 166  | 268  |
| LmjF04.0390 | <i>L. major</i> | 56  | 189  | 244  |
| LmjF04.0400 | <i>L. major</i> | 51  | 1    | 51   |
| LmjF04.0400 | <i>L. major</i> | 91  | 175  | 265  |
| LmjF04.0410 | <i>L. major</i> | 478 | 1    | 478  |
| LmjF04.0410 | <i>L. major</i> | 362 | 530  | 891  |
| LmjF04.0410 | <i>L. major</i> | 76  | 898  | 973  |
| LmjF04.0410 | <i>L. major</i> | 109 | 996  | 1104 |
| LmjF04.0420 | <i>L. major</i> | 69  | 293  | 361  |
| LmjF04.0430 | <i>L. major</i> | 63  | 195  | 257  |
| LmjF04.0430 | <i>L. major</i> | 69  | 303  | 371  |
| LmjF04.0430 | <i>L. major</i> | 124 | 526  | 649  |
| LmjF04.0430 | <i>L. major</i> | 43  | 802  | 844  |
| LmjF04.0430 | <i>L. major</i> | 66  | 1077 | 1142 |
| LmjF04.0430 | <i>L. major</i> | 43  | 1205 | 1247 |
| LmjF04.0430 | <i>L. major</i> | 119 | 1277 | 1395 |
| LmjF04.0430 | <i>L. major</i> | 41  | 2871 | 2911 |
| LmjF04.0430 | <i>L. major</i> | 69  | 2915 | 2983 |
| LmjF04.0430 | <i>L. major</i> | 42  | 3030 | 3071 |
| LmjF04.0440 | <i>L. major</i> | 260 | 37   | 296  |
| LmjF04.0440 | <i>L. major</i> | 573 | 312  | 884  |
| LmjF04.0440 | <i>L. major</i> | 49  | 925  | 973  |
| LmjF04.0440 | <i>L. major</i> | 59  | 1005 | 1063 |
| LmjF04.0440 | <i>L. major</i> | 62  | 1206 | 1267 |
| LmjF04.0450 | <i>L. major</i> | 143 | 1    | 143  |
| LmjF04.0470 | <i>L. major</i> | 50  | 139  | 188  |
| LmjF04.0490 | <i>L. major</i> | 230 | 89   | 318  |
| LmjF04.0500 | <i>L. major</i> | 608 | 1    | 608  |
| LmjF04.0500 | <i>L. major</i> | 428 | 610  | 1037 |
| LmjF04.0500 | <i>L. major</i> | 276 | 1124 | 1399 |
| LmjF04.0500 | <i>L. major</i> | 198 | 1423 | 1620 |
| LmjF04.0500 | <i>L. major</i> | 70  | 1747 | 1816 |
| LmjF04.0500 | <i>L. major</i> | 49  | 1839 | 1887 |

|             |                 |     |      |      |
|-------------|-----------------|-----|------|------|
| LmjF04.0500 | <i>L. major</i> | 246 | 1922 | 2167 |
| LmjF04.0500 | <i>L. major</i> | 405 | 2287 | 2691 |
| LmjF04.0500 | <i>L. major</i> | 142 | 2698 | 2839 |
| LmjF04.0500 | <i>L. major</i> | 162 | 2851 | 3012 |
| LmjF04.0510 | <i>L. major</i> | 173 | 1    | 173  |
| LmjF04.0510 | <i>L. major</i> | 296 | 201  | 496  |
| LmjF04.0510 | <i>L. major</i> | 68  | 648  | 715  |
| LmjF04.0510 | <i>L. major</i> | 81  | 725  | 805  |
| LmjF04.0510 | <i>L. major</i> | 118 | 815  | 932  |
| LmjF04.0510 | <i>L. major</i> | 78  | 1116 | 1193 |
| LmjF04.0510 | <i>L. major</i> | 134 | 1197 | 1330 |
| LmjF04.0520 | <i>L. major</i> | 59  | 96   | 154  |
| LmjF04.0520 | <i>L. major</i> | 85  | 279  | 363  |
| LmjF04.0520 | <i>L. major</i> | 114 | 888  | 1001 |
| LmjF04.0530 | <i>L. major</i> | 195 | 1    | 195  |
| LmjF04.0530 | <i>L. major</i> | 96  | 249  | 344  |
| LmjF04.0530 | <i>L. major</i> | 53  | 396  | 448  |
| LmjF04.0540 | <i>L. major</i> | 153 | 104  | 256  |
| LmjF04.0540 | <i>L. major</i> | 168 | 421  | 588  |
| LmjF04.0550 | <i>L. major</i> | 69  | 1252 | 1320 |
| LmjF04.0560 | <i>L. major</i> | 101 | 200  | 300  |
| LmjF04.0570 | <i>L. major</i> | 51  | 31   | 81   |
| LmjF04.0570 | <i>L. major</i> | 48  | 488  | 535  |
| LmjF04.0570 | <i>L. major</i> | 57  | 581  | 637  |
| LmjF04.0570 | <i>L. major</i> | 123 | 675  | 797  |
| LmjF04.0570 | <i>L. major</i> | 63  | 1005 | 1067 |
| LmjF04.0570 | <i>L. major</i> | 42  | 1205 | 1246 |
| LmjF04.0570 | <i>L. major</i> | 106 | 1322 | 1427 |
| LmjF04.0570 | <i>L. major</i> | 114 | 1452 | 1565 |
| LmjF04.0590 | <i>L. major</i> | 41  | 130  | 170  |
| LmjF04.0600 | <i>L. major</i> | 43  | 76   | 118  |
| LmjF04.0600 | <i>L. major</i> | 240 | 236  | 475  |
| LmjF04.0600 | <i>L. major</i> | 66  | 589  | 654  |
| LmjF04.0600 | <i>L. major</i> | 150 | 743  | 892  |
| LmjF04.0600 | <i>L. major</i> | 191 | 914  | 1104 |
| LmjF04.0600 | <i>L. major</i> | 46  | 1119 | 1164 |
| LmjF04.0600 | <i>L. major</i> | 141 | 1277 | 1417 |
| LmjF04.0600 | <i>L. major</i> | 72  | 1500 | 1571 |
| LmjF04.0600 | <i>L. major</i> | 103 | 1633 | 1735 |
| LmjF04.0600 | <i>L. major</i> | 123 | 1782 | 1904 |
| LmjF04.0600 | <i>L. major</i> | 287 | 1962 | 2248 |
| LmjF04.0600 | <i>L. major</i> | 75  | 2258 | 2332 |
| LmjF04.0600 | <i>L. major</i> | 174 | 2387 | 2560 |
| LmjF04.0600 | <i>L. major</i> | 64  | 2625 | 2688 |
| LmjF04.0600 | <i>L. major</i> | 179 | 2700 | 2878 |
| LmjF04.0600 | <i>L. major</i> | 123 | 2890 | 3012 |
| LmjF04.0610 | <i>L. major</i> | 168 | 1    | 168  |

|             |                 |      |      |      |
|-------------|-----------------|------|------|------|
| LmjF04.0620 | <i>L. major</i> | 42   | 1    | 42   |
| LmjF04.0620 | <i>L. major</i> | 1136 | 111  | 1246 |
| LmjF04.0625 | <i>L. major</i> | 144  | 195  | 338  |
| LmjF04.0650 | <i>L. major</i> | 51   | 117  | 167  |
| LmjF04.0650 | <i>L. major</i> | 74   | 197  | 270  |
| LmjF04.0650 | <i>L. major</i> | 86   | 480  | 565  |
| LmjF04.0650 | <i>L. major</i> | 96   | 582  | 677  |
| LmjF04.0650 | <i>L. major</i> | 49   | 728  | 776  |
| LmjF04.0650 | <i>L. major</i> | 123  | 1009 | 1131 |
| LmjF04.0660 | <i>L. major</i> | 49   | 1    | 49   |
| LmjF04.0670 | <i>L. major</i> | 54   | 1    | 54   |
| LmjF04.0690 | <i>L. major</i> | 82   | 1    | 82   |
| LmjF04.0690 | <i>L. major</i> | 124  | 119  | 242  |
| LmjF04.0690 | <i>L. major</i> | 45   | 324  | 368  |
| LmjF04.0690 | <i>L. major</i> | 76   | 490  | 565  |
| LmjF04.0690 | <i>L. major</i> | 55   | 700  | 754  |
| LmjF04.0700 | <i>L. major</i> | 284  | 1    | 284  |
| LmjF04.0700 | <i>L. major</i> | 100  | 305  | 404  |
| LmjF04.0700 | <i>L. major</i> | 192  | 521  | 712  |
| LmjF04.0700 | <i>L. major</i> | 85   | 754  | 838  |
| LmjF04.0700 | <i>L. major</i> | 65   | 940  | 1004 |
| LmjF04.0710 | <i>L. major</i> | 249  | 86   | 334  |
| LmjF04.0710 | <i>L. major</i> | 118  | 348  | 465  |
| LmjF04.0710 | <i>L. major</i> | 98   | 596  | 693  |
| LmjF04.0720 | <i>L. major</i> | 227  | 1    | 227  |
| LmjF04.0720 | <i>L. major</i> | 88   | 246  | 333  |
| LmjF04.0720 | <i>L. major</i> | 281  | 363  | 643  |
| LmjF04.0730 | <i>L. major</i> | 172  | 3    | 174  |
| LmjF04.0730 | <i>L. major</i> | 69   | 183  | 251  |
| LmjF04.0730 | <i>L. major</i> | 47   | 383  | 429  |
| LmjF04.0730 | <i>L. major</i> | 49   | 562  | 610  |
| LmjF04.0740 | <i>L. major</i> | 53   | 1    | 53   |
| LmjF04.0740 | <i>L. major</i> | 122  | 128  | 249  |
| LmjF04.0740 | <i>L. major</i> | 92   | 281  | 372  |
| LmjF04.0740 | <i>L. major</i> | 365  | 452  | 816  |
| LmjF04.0760 | <i>L. major</i> | 73   | 48   | 120  |
| LmjF04.0760 | <i>L. major</i> | 68   | 162  | 229  |
| LmjF04.0760 | <i>L. major</i> | 68   | 162  | 229  |
| LmjF04.0770 | <i>L. major</i> | 48   | 1    | 48   |
| LmjF04.0770 | <i>L. major</i> | 68   | 90   | 157  |
| LmjF04.0770 | <i>L. major</i> | 68   | 90   | 157  |
| LmjF04.0780 | <i>L. major</i> | 55   | 224  | 278  |
| LmjF04.0780 | <i>L. major</i> | 40   | 377  | 416  |
| LmjF04.0780 | <i>L. major</i> | 75   | 499  | 573  |
| LmjF04.0790 | <i>L. major</i> | 738  | 340  | 1077 |
| LmjF04.0800 | <i>L. major</i> | 79   | 1    | 79   |
| LmjF04.0800 | <i>L. major</i> | 95   | 88   | 182  |

|             |                 |      |      |      |
|-------------|-----------------|------|------|------|
| LmjF04.0800 | <i>L. major</i> | 91   | 213  | 303  |
| LmjF04.0810 | <i>L. major</i> | 60   | 257  | 316  |
| LmjF04.0810 | <i>L. major</i> | 213  | 459  | 671  |
| LmjF04.0820 | <i>L. major</i> | 42   | 1    | 42   |
| LmjF04.0820 | <i>L. major</i> | 93   | 73   | 165  |
| LmjF04.0820 | <i>L. major</i> | 53   | 449  | 501  |
| LmjF04.0830 | <i>L. major</i> | 209  | 1    | 209  |
| LmjF04.0830 | <i>L. major</i> | 303  | 214  | 516  |
| LmjF04.0830 | <i>L. major</i> | 192  | 571  | 762  |
| LmjF04.0830 | <i>L. major</i> | 428  | 773  | 1200 |
| LmjF04.0830 | <i>L. major</i> | 104  | 1209 | 1312 |
| LmjF04.0840 | <i>L. major</i> | 123  | 1    | 123  |
| LmjF04.0840 | <i>L. major</i> | 266  | 127  | 392  |
| LmjF04.0840 | <i>L. major</i> | 74   | 580  | 653  |
| LmjF04.0840 | <i>L. major</i> | 126  | 684  | 809  |
| LmjF04.0840 | <i>L. major</i> | 78   | 814  | 891  |
| LmjF04.0850 | <i>L. major</i> | 92   | 1    | 92   |
| LmjF04.0850 | <i>L. major</i> | 52   | 138  | 189  |
| LmjF04.0860 | <i>L. major</i> | 61   | 35   | 95   |
| LmjF04.0860 | <i>L. major</i> | 56   | 191  | 246  |
| LmjF04.0860 | <i>L. major</i> | 68   | 342  | 409  |
| LmjF04.0870 | <i>L. major</i> | 72   | 1    | 72   |
| LmjF04.0870 | <i>L. major</i> | 1155 | 87   | 1241 |
| LmjF04.0880 | <i>L. major</i> | 180  | 1    | 180  |
| LmjF04.0890 | <i>L. major</i> | 102  | 1    | 102  |
| LmjF04.0890 | <i>L. major</i> | 81   | 242  | 322  |
| LmjF04.0890 | <i>L. major</i> | 810  | 470  | 1279 |
| LmjF04.0900 | <i>L. major</i> | 975  | 1    | 975  |
| LmjF04.0900 | <i>L. major</i> | 56   | 1028 | 1083 |
| LmjF04.0900 | <i>L. major</i> | 90   | 1355 | 1444 |
| LmjF04.0900 | <i>L. major</i> | 86   | 1642 | 1727 |
| LmjF04.0900 | <i>L. major</i> | 48   | 1845 | 1892 |
| LmjF04.0910 | <i>L. major</i> | 124  | 65   | 188  |
| LmjF04.0920 | <i>L. major</i> | 86   | 1    | 86   |
| LmjF04.0920 | <i>L. major</i> | 154  | 140  | 293  |
| LmjF04.0920 | <i>L. major</i> | 205  | 309  | 513  |
| LmjF04.0930 | <i>L. major</i> | 90   | 1    | 90   |
| LmjF04.0930 | <i>L. major</i> | 83   | 159  | 241  |
| LmjF04.0930 | <i>L. major</i> | 83   | 159  | 241  |
| LmjF04.0940 | <i>L. major</i> | 64   | 24   | 87   |
| LmjF04.0940 | <i>L. major</i> | 136  | 95   | 230  |
| LmjF04.0940 | <i>L. major</i> | 92   | 264  | 355  |
| LmjF04.0970 | <i>L. major</i> | 307  | 18   | 324  |
| LmjF04.0975 | <i>L. major</i> | 84   | 31   | 114  |
| LmjF04.0975 | <i>L. major</i> | 127  | 192  | 318  |
| LmjF04.0975 | <i>L. major</i> | 118  | 327  | 444  |
| LmjF04.0980 | <i>L. major</i> | 256  | 1    | 256  |

|             |                 |     |      |      |
|-------------|-----------------|-----|------|------|
| LmjF04.0980 | <i>L. major</i> | 53  | 292  | 344  |
| LmjF04.0980 | <i>L. major</i> | 46  | 387  | 432  |
| LmjF04.0980 | <i>L. major</i> | 58  | 446  | 503  |
| LmjF04.0980 | <i>L. major</i> | 106 | 745  | 850  |
| LmjF04.0980 | <i>L. major</i> | 59  | 994  | 1052 |
| LmjF04.0990 | <i>L. major</i> | 170 | 1    | 170  |
| LmjF04.0990 | <i>L. major</i> | 110 | 224  | 333  |
| LmjF04.0990 | <i>L. major</i> | 73  | 372  | 444  |
| LmjF04.1000 | <i>L. major</i> | 52  | 71   | 122  |
| LmjF04.1000 | <i>L. major</i> | 64  | 713  | 776  |
| LmjF04.1000 | <i>L. major</i> | 223 | 956  | 1178 |
| LmjF04.1010 | <i>L. major</i> | 222 | 1    | 222  |
| LmjF04.1020 | <i>L. major</i> | 44  | 1    | 44   |
| LmjF04.1030 | <i>L. major</i> | 54  | 141  | 194  |
| LmjF04.1040 | <i>L. major</i> | 68  | 1    | 68   |
| LmjF04.1050 | <i>L. major</i> | 50  | 307  | 356  |
| LmjF04.1060 | <i>L. major</i> | 50  | 55   | 104  |
| LmjF04.1060 | <i>L. major</i> | 306 | 180  | 485  |
| LmjF04.1070 | <i>L. major</i> | 59  | 1    | 59   |
| LmjF04.1080 | <i>L. major</i> | 243 | 1    | 243  |
| LmjF04.1080 | <i>L. major</i> | 65  | 826  | 890  |
| LmjF04.1090 | <i>L. major</i> | 932 | 1    | 932  |
| LmjF04.1090 | <i>L. major</i> | 107 | 979  | 1085 |
| LmjF04.1090 | <i>L. major</i> | 210 | 1120 | 1329 |
| LmjF04.1100 | <i>L. major</i> | 55  | 81   | 135  |
| LmjF04.1110 | <i>L. major</i> | 45  | 894  | 938  |
| LmjF04.1120 | <i>L. major</i> | 53  | 38   | 90   |
| LmjF04.1120 | <i>L. major</i> | 43  | 133  | 175  |
| LmjF04.1120 | <i>L. major</i> | 141 | 202  | 342  |
| LmjF04.1120 | <i>L. major</i> | 74  | 373  | 446  |
| LmjF04.1120 | <i>L. major</i> | 338 | 494  | 831  |
| LmjF04.1130 | <i>L. major</i> | 48  | 37   | 84   |
| LmjF04.1140 | <i>L. major</i> | 300 | 1    | 300  |
| LmjF04.1150 | <i>L. major</i> | 59  | 110  | 168  |
| LmjF04.1170 | <i>L. major</i> | 90  | 1    | 90   |
| LmjF04.1170 | <i>L. major</i> | 46  | 266  | 311  |
| LmjF04.1180 | <i>L. major</i> | 56  | 1084 | 1139 |
| LmjF04.1180 | <i>L. major</i> | 174 | 1253 | 1426 |
| LmjF04.1180 | <i>L. major</i> | 154 | 1440 | 1593 |
| LmjF04.1180 | <i>L. major</i> | 234 | 1612 | 1845 |
| LmjF04.1180 | <i>L. major</i> | 600 | 1860 | 2459 |
| LmjF04.1210 | <i>L. major</i> | 61  | 308  | 368  |
| LmjF04.1220 | <i>L. major</i> | 353 | 107  | 459  |
| LmjF04.1220 | <i>L. major</i> | 84  | 951  | 1034 |
| LmjF05.0010 | <i>L. major</i> | 105 | 1    | 105  |
| LmjF05.0010 | <i>L. major</i> | 54  | 133  | 186  |
| LmjF05.0010 | <i>L. major</i> | 42  | 203  | 244  |

|             |                 |     |      |      |
|-------------|-----------------|-----|------|------|
| LmjF05.0010 | <i>L. major</i> | 172 | 254  | 425  |
| LmjF05.0010 | <i>L. major</i> | 44  | 431  | 474  |
| LmjF05.0010 | <i>L. major</i> | 91  | 525  | 615  |
| LmjF05.0010 | <i>L. major</i> | 155 | 684  | 838  |
| LmjF05.0020 | <i>L. major</i> | 44  | 16   | 59   |
| LmjF05.0040 | <i>L. major</i> | 355 | 1    | 355  |
| LmjF05.0040 | <i>L. major</i> | 93  | 382  | 474  |
| LmjF05.0050 | <i>L. major</i> | 105 | 46   | 150  |
| LmjF05.0050 | <i>L. major</i> | 86  | 185  | 270  |
| LmjF05.0050 | <i>L. major</i> | 54  | 357  | 410  |
| LmjF05.0050 | <i>L. major</i> | 80  | 754  | 833  |
| LmjF05.0060 | <i>L. major</i> | 157 | 618  | 774  |
| LmjF05.0080 | <i>L. major</i> | 110 | 1    | 110  |
| LmjF05.0080 | <i>L. major</i> | 44  | 158  | 201  |
| LmjF05.0080 | <i>L. major</i> | 44  | 158  | 201  |
| LmjF05.0100 | <i>L. major</i> | 53  | 226  | 278  |
| LmjF05.0120 | <i>L. major</i> | 44  | 272  | 315  |
| LmjF05.0130 | <i>L. major</i> | 74  | 359  | 432  |
| LmjF05.0140 | <i>L. major</i> | 89  | 1    | 89   |
| LmjF05.0140 | <i>L. major</i> | 57  | 618  | 674  |
| LmjF05.0150 | <i>L. major</i> | 49  | 393  | 441  |
| LmjF05.0160 | <i>L. major</i> | 245 | 3    | 247  |
| LmjF05.0160 | <i>L. major</i> | 229 | 290  | 518  |
| LmjF05.0170 | <i>L. major</i> | 427 | 1    | 427  |
| LmjF05.0170 | <i>L. major</i> | 324 | 438  | 761  |
| LmjF05.0180 | <i>L. major</i> | 64  | 119  | 182  |
| LmjF05.0180 | <i>L. major</i> | 113 | 187  | 299  |
| LmjF05.0190 | <i>L. major</i> | 245 | 120  | 364  |
| LmjF05.0200 | <i>L. major</i> | 48  | 1    | 48   |
| LmjF05.0200 | <i>L. major</i> | 121 | 260  | 380  |
| LmjF05.0200 | <i>L. major</i> | 83  | 584  | 666  |
| LmjF05.0200 | <i>L. major</i> | 99  | 691  | 789  |
| LmjF05.0210 | <i>L. major</i> | 117 | 1    | 117  |
| LmjF05.0210 | <i>L. major</i> | 70  | 172  | 241  |
| LmjF05.0210 | <i>L. major</i> | 42  | 407  | 448  |
| LmjF05.0210 | <i>L. major</i> | 64  | 1054 | 1117 |
| LmjF05.0210 | <i>L. major</i> | 187 | 1286 | 1472 |
| LmjF05.0220 | <i>L. major</i> | 42  | 1    | 42   |
| LmjF05.0220 | <i>L. major</i> | 458 | 208  | 665  |
| LmjF05.0230 | <i>L. major</i> | 50  | 1    | 50   |
| LmjF05.0230 | <i>L. major</i> | 40  | 158  | 197  |
| LmjF05.0230 | <i>L. major</i> | 57  | 354  | 410  |
| LmjF05.0230 | <i>L. major</i> | 67  | 525  | 591  |
| LmjF05.0240 | <i>L. major</i> | 70  | 103  | 172  |
| LmjF05.0240 | <i>L. major</i> | 860 | 174  | 1033 |
| LmjF05.0240 | <i>L. major</i> | 103 | 1137 | 1239 |
| LmjF05.0260 | <i>L. major</i> | 50  | 100  | 149  |

|             |                 |      |      |      |
|-------------|-----------------|------|------|------|
| LmjF05.0260 | <i>L. major</i> | 111  | 283  | 393  |
| LmjF05.0270 | <i>L. major</i> | 115  | 1    | 115  |
| LmjF05.0270 | <i>L. major</i> | 108  | 212  | 319  |
| LmjF05.0270 | <i>L. major</i> | 108  | 212  | 319  |
| LmjF05.0285 | <i>L. major</i> | 89   | 1    | 89   |
| LmjF05.0290 | <i>L. major</i> | 41   | 11   | 51   |
| LmjF05.0290 | <i>L. major</i> | 43   | 387  | 429  |
| LmjF05.0290 | <i>L. major</i> | 43   | 387  | 429  |
| LmjF05.0300 | <i>L. major</i> | 95   | 94   | 188  |
| LmjF05.0300 | <i>L. major</i> | 86   | 209  | 294  |
| LmjF05.0300 | <i>L. major</i> | 91   | 477  | 567  |
| LmjF05.0300 | <i>L. major</i> | 107  | 603  | 709  |
| LmjF05.0300 | <i>L. major</i> | 40   | 729  | 768  |
| LmjF05.0300 | <i>L. major</i> | 64   | 801  | 864  |
| LmjF05.0310 | <i>L. major</i> | 79   | 1    | 79   |
| LmjF05.0330 | <i>L. major</i> | 48   | 309  | 356  |
| LmjF05.0330 | <i>L. major</i> | 111  | 386  | 496  |
| LmjF05.0330 | <i>L. major</i> | 41   | 806  | 846  |
| LmjF05.0340 | <i>L. major</i> | 42   | 146  | 187  |
| LmjF05.0360 | <i>L. major</i> | 57   | 185  | 241  |
| LmjF05.0360 | <i>L. major</i> | 148  | 478  | 625  |
| LmjF05.0370 | <i>L. major</i> | 53   | 75   | 127  |
| LmjF05.0370 | <i>L. major</i> | 169  | 160  | 328  |
| LmjF05.0380 | <i>L. major</i> | 1484 | 4    | 1487 |
| LmjF05.0380 | <i>L. major</i> | 282  | 1489 | 1770 |
| LmjF05.0380 | <i>L. major</i> | 43   | 1777 | 1819 |
| LmjF05.0390 | <i>L. major</i> | 97   | 1    | 97   |
| LmjF05.0390 | <i>L. major</i> | 113  | 320  | 432  |
| LmjF05.0400 | <i>L. major</i> | 319  | 177  | 495  |
| LmjF05.0400 | <i>L. major</i> | 217  | 726  | 942  |
| LmjF05.0410 | <i>L. major</i> | 138  | 1    | 138  |
| LmjF05.0410 | <i>L. major</i> | 69   | 199  | 267  |
| LmjF05.0410 | <i>L. major</i> | 43   | 315  | 357  |
| LmjF05.0410 | <i>L. major</i> | 100  | 432  | 531  |
| LmjF05.0410 | <i>L. major</i> | 60   | 562  | 621  |
| LmjF05.0430 | <i>L. major</i> | 59   | 42   | 100  |
| LmjF05.0430 | <i>L. major</i> | 59   | 198  | 256  |
| LmjF05.0430 | <i>L. major</i> | 59   | 198  | 256  |
| LmjF05.0440 | <i>L. major</i> | 69   | 86   | 154  |
| LmjF05.0440 | <i>L. major</i> | 45   | 182  | 226  |
| LmjF05.0440 | <i>L. major</i> | 40   | 447  | 486  |
| LmjF05.0440 | <i>L. major</i> | 43   | 722  | 764  |
| LmjF05.0460 | <i>L. major</i> | 69   | 1    | 69   |
| LmjF05.0460 | <i>L. major</i> | 86   | 110  | 195  |
| LmjF05.0460 | <i>L. major</i> | 154  | 474  | 627  |
| LmjF05.0470 | <i>L. major</i> | 158  | 186  | 343  |
| LmjF05.0480 | <i>L. major</i> | 122  | 211  | 332  |



|             |                 |     |      |      |
|-------------|-----------------|-----|------|------|
| LmjF05.0490 | <i>L. major</i> | 43  | 1    | 43   |
| LmjF05.0530 | <i>L. major</i> | 261 | 1    | 261  |
| LmjF05.0530 | <i>L. major</i> | 386 | 325  | 710  |
| LmjF05.0530 | <i>L. major</i> | 209 | 723  | 931  |
| LmjF05.0530 | <i>L. major</i> | 115 | 961  | 1075 |
| LmjF05.0530 | <i>L. major</i> | 56  | 1122 | 1177 |
| LmjF05.0530 | <i>L. major</i> | 150 | 1247 | 1396 |
| LmjF05.0530 | <i>L. major</i> | 153 | 1437 | 1589 |
| LmjF05.0530 | <i>L. major</i> | 193 | 1660 | 1852 |
| LmjF05.0540 | <i>L. major</i> | 46  | 82   | 127  |
| LmjF05.0560 | <i>L. major</i> | 122 | 54   | 175  |
| LmjF05.0560 | <i>L. major</i> | 73  | 206  | 278  |
| LmjF05.0560 | <i>L. major</i> | 59  | 369  | 427  |
| LmjF05.0560 | <i>L. major</i> | 127 | 511  | 637  |
| LmjF05.0570 | <i>L. major</i> | 58  | 193  | 250  |
| LmjF05.0580 | <i>L. major</i> | 132 | 1    | 132  |
| LmjF05.0580 | <i>L. major</i> | 49  | 338  | 386  |
| LmjF05.0580 | <i>L. major</i> | 232 | 553  | 784  |
| LmjF05.0590 | <i>L. major</i> | 241 | 13   | 253  |
| LmjF05.0590 | <i>L. major</i> | 45  | 572  | 616  |
| LmjF05.0590 | <i>L. major</i> | 57  | 675  | 731  |
| LmjF05.0590 | <i>L. major</i> | 142 | 806  | 947  |
| LmjF05.0600 | <i>L. major</i> | 41  | 146  | 186  |
| LmjF05.0600 | <i>L. major</i> | 42  | 479  | 520  |
| LmjF05.0600 | <i>L. major</i> | 46  | 628  | 673  |
| LmjF05.0600 | <i>L. major</i> | 40  | 863  | 902  |
| LmjF05.0610 | <i>L. major</i> | 145 | 1    | 145  |
| LmjF05.0610 | <i>L. major</i> | 156 | 266  | 421  |
| LmjF05.0610 | <i>L. major</i> | 42  | 551  | 592  |
| LmjF05.0610 | <i>L. major</i> | 92  | 597  | 688  |
| LmjF05.0610 | <i>L. major</i> | 122 | 699  | 820  |
| LmjF05.0610 | <i>L. major</i> | 43  | 836  | 878  |
| LmjF05.0620 | <i>L. major</i> | 398 | 45   | 442  |
| LmjF05.0620 | <i>L. major</i> | 133 | 556  | 688  |
| LmjF05.0620 | <i>L. major</i> | 160 | 715  | 874  |
| LmjF05.0630 | <i>L. major</i> | 117 | 1    | 117  |
| LmjF05.0630 | <i>L. major</i> | 50  | 193  | 242  |
| LmjF05.0630 | <i>L. major</i> | 43  | 554  | 596  |
| LmjF05.0630 | <i>L. major</i> | 54  | 632  | 685  |
| LmjF05.0630 | <i>L. major</i> | 89  | 706  | 794  |
| LmjF05.0630 | <i>L. major</i> | 304 | 924  | 1227 |
| LmjF05.0640 | <i>L. major</i> | 47  | 1    | 47   |
| LmjF05.0640 | <i>L. major</i> | 66  | 85   | 150  |
| LmjF05.0640 | <i>L. major</i> | 69  | 175  | 243  |
| LmjF05.0640 | <i>L. major</i> | 95  | 363  | 457  |
| LmjF05.0640 | <i>L. major</i> | 41  | 720  | 760  |
| LmjF05.0640 | <i>L. major</i> | 85  | 822  | 906  |

|             |                 |      |      |      |
|-------------|-----------------|------|------|------|
| LmjF05.0640 | <i>L. major</i> | 67   | 1097 | 1163 |
| LmjF05.0640 | <i>L. major</i> | 55   | 1183 | 1237 |
| LmjF05.0640 | <i>L. major</i> | 192  | 1352 | 1543 |
| LmjF05.0640 | <i>L. major</i> | 105  | 1681 | 1785 |
| LmjF05.0650 | <i>L. major</i> | 110  | 1    | 110  |
| LmjF05.0650 | <i>L. major</i> | 47   | 303  | 349  |
| LmjF05.0650 | <i>L. major</i> | 213  | 387  | 599  |
| LmjF05.0650 | <i>L. major</i> | 145  | 670  | 814  |
| LmjF05.0660 | <i>L. major</i> | 90   | 1    | 90   |
| LmjF05.0670 | <i>L. major</i> | 1212 | 1    | 1212 |
| LmjF05.0670 | <i>L. major</i> | 365  | 1225 | 1589 |
| LmjF05.0670 | <i>L. major</i> | 709  | 1638 | 2346 |
| LmjF05.0670 | <i>L. major</i> | 168  | 2377 | 2544 |
| LmjF05.0680 | <i>L. major</i> | 51   | 1    | 51   |
| LmjF05.0690 | <i>L. major</i> | 155  | 1    | 155  |
| LmjF05.0690 | <i>L. major</i> | 247  | 157  | 403  |
| LmjF05.0690 | <i>L. major</i> | 326  | 452  | 777  |
| LmjF05.0690 | <i>L. major</i> | 127  | 950  | 1076 |
| LmjF05.0690 | <i>L. major</i> | 130  | 1157 | 1286 |
| LmjF05.0690 | <i>L. major</i> | 320  | 1323 | 1642 |
| LmjF05.0690 | <i>L. major</i> | 60   | 1725 | 1784 |
| LmjF05.0690 | <i>L. major</i> | 690  | 1800 | 2489 |
| LmjF05.0690 | <i>L. major</i> | 61   | 2510 | 2570 |
| LmjF05.0690 | <i>L. major</i> | 81   | 2607 | 2687 |
| LmjF05.0700 | <i>L. major</i> | 1078 | 1    | 1078 |
| LmjF05.0700 | <i>L. major</i> | 179  | 1086 | 1264 |
| LmjF05.0700 | <i>L. major</i> | 193  | 1278 | 1470 |
| LmjF05.0700 | <i>L. major</i> | 90   | 1521 | 1610 |
| LmjF05.0700 | <i>L. major</i> | 118  | 1626 | 1743 |
| LmjF05.0710 | <i>L. major</i> | 659  | 1    | 659  |
| LmjF05.0710 | <i>L. major</i> | 52   | 825  | 876  |
| LmjF05.0710 | <i>L. major</i> | 504  | 920  | 1423 |
| LmjF05.0720 | <i>L. major</i> | 303  | 1    | 303  |
| LmjF05.0720 | <i>L. major</i> | 261  | 306  | 566  |
| LmjF05.0720 | <i>L. major</i> | 142  | 704  | 845  |
| LmjF05.0720 | <i>L. major</i> | 390  | 913  | 1302 |
| LmjF05.0730 | <i>L. major</i> | 579  | 81   | 659  |
| LmjF05.0730 | <i>L. major</i> | 64   | 675  | 738  |
| LmjF05.0740 | <i>L. major</i> | 179  | 155  | 333  |
| LmjF05.0750 | <i>L. major</i> | 70   | 31   | 100  |
| LmjF05.0750 | <i>L. major</i> | 136  | 283  | 418  |
| LmjF05.0750 | <i>L. major</i> | 136  | 283  | 418  |
| LmjF05.0760 | <i>L. major</i> | 74   | 27   | 100  |
| LmjF05.0760 | <i>L. major</i> | 151  | 113  | 263  |
| LmjF05.0760 | <i>L. major</i> | 194  | 423  | 616  |
| LmjF05.0760 | <i>L. major</i> | 43   | 635  | 677  |
| LmjF05.0760 | <i>L. major</i> | 79   | 685  | 763  |

|             |                 |      |      |      |
|-------------|-----------------|------|------|------|
| LmjF05.0760 | <i>L. major</i> | 150  | 864  | 1013 |
| LmjF05.0760 | <i>L. major</i> | 95   | 1070 | 1164 |
| LmjF05.0760 | <i>L. major</i> | 83   | 1172 | 1254 |
| LmjF05.0770 | <i>L. major</i> | 782  | 19   | 800  |
| LmjF05.0770 | <i>L. major</i> | 515  | 816  | 1330 |
| LmjF05.0790 | <i>L. major</i> | 276  | 1    | 276  |
| LmjF05.0790 | <i>L. major</i> | 45   | 299  | 343  |
| LmjF05.0800 | <i>L. major</i> | 41   | 52   | 92   |
| LmjF05.0800 | <i>L. major</i> | 77   | 175  | 251  |
| LmjF05.0820 | <i>L. major</i> | 44   | 1    | 44   |
| LmjF05.0820 | <i>L. major</i> | 53   | 199  | 251  |
| LmjF05.0820 | <i>L. major</i> | 45   | 357  | 401  |
| LmjF05.0840 | <i>L. major</i> | 634  | 1    | 634  |
| LmjF05.0840 | <i>L. major</i> | 754  | 643  | 1396 |
| LmjF05.0850 | <i>L. major</i> | 115  | 1    | 115  |
| LmjF05.0850 | <i>L. major</i> | 351  | 160  | 510  |
| LmjF05.0850 | <i>L. major</i> | 153  | 512  | 664  |
| LmjF05.0860 | <i>L. major</i> | 95   | 61   | 155  |
| LmjF05.0870 | <i>L. major</i> | 156  | 203  | 358  |
| LmjF05.0870 | <i>L. major</i> | 130  | 441  | 570  |
| LmjF05.0870 | <i>L. major</i> | 41   | 603  | 643  |
| LmjF05.0870 | <i>L. major</i> | 1277 | 646  | 1922 |
| LmjF05.0880 | <i>L. major</i> | 59   | 1    | 59   |
| LmjF05.0880 | <i>L. major</i> | 46   | 160  | 205  |
| LmjF05.0880 | <i>L. major</i> | 46   | 160  | 205  |
| LmjF05.0890 | <i>L. major</i> | 65   | 248  | 312  |
| LmjF05.0890 | <i>L. major</i> | 41   | 534  | 574  |
| LmjF05.0890 | <i>L. major</i> | 188  | 630  | 817  |
| LmjF05.0890 | <i>L. major</i> | 58   | 861  | 918  |
| LmjF05.0890 | <i>L. major</i> | 59   | 1075 | 1133 |
| LmjF05.0890 | <i>L. major</i> | 74   | 1138 | 1211 |
| LmjF05.0890 | <i>L. major</i> | 59   | 1287 | 1345 |
| LmjF05.0890 | <i>L. major</i> | 41   | 1367 | 1407 |
| LmjF05.0890 | <i>L. major</i> | 43   | 1573 | 1615 |
| LmjF05.0890 | <i>L. major</i> | 51   | 1930 | 1980 |
| LmjF05.0910 | <i>L. major</i> | 56   | 1    | 56   |
| LmjF05.0910 | <i>L. major</i> | 71   | 102  | 172  |
| LmjF05.0910 | <i>L. major</i> | 65   | 509  | 573  |
| LmjF05.0910 | <i>L. major</i> | 51   | 614  | 664  |
| LmjF05.0910 | <i>L. major</i> | 96   | 719  | 814  |
| LmjF05.0910 | <i>L. major</i> | 58   | 975  | 1032 |
| LmjF05.0920 | <i>L. major</i> | 135  | 1    | 135  |
| LmjF05.0920 | <i>L. major</i> | 295  | 147  | 441  |
| LmjF05.0920 | <i>L. major</i> | 60   | 545  | 604  |
| LmjF05.0920 | <i>L. major</i> | 54   | 645  | 698  |
| LmjF05.0920 | <i>L. major</i> | 271  | 844  | 1114 |
| LmjF05.0930 | <i>L. major</i> | 251  | 160  | 410  |

|             |                 |     |      |      |
|-------------|-----------------|-----|------|------|
| LmjF05.0940 | <i>L. major</i> | 507 | 127  | 633  |
| LmjF05.0940 | <i>L. major</i> | 199 | 709  | 907  |
| LmjF05.0940 | <i>L. major</i> | 247 | 932  | 1178 |
| LmjF05.0950 | <i>L. major</i> | 66  | 225  | 290  |
| LmjF05.0950 | <i>L. major</i> | 41  | 338  | 378  |
| LmjF05.0950 | <i>L. major</i> | 51  | 711  | 761  |
| LmjF05.1010 | <i>L. major</i> | 41  | 95   | 135  |
| LmjF05.1010 | <i>L. major</i> | 141 | 475  | 615  |
| LmjF05.1020 | <i>L. major</i> | 66  | 179  | 244  |
| LmjF05.1020 | <i>L. major</i> | 61  | 307  | 367  |
| LmjF05.1020 | <i>L. major</i> | 46  | 455  | 500  |
| LmjF05.1020 | <i>L. major</i> | 42  | 668  | 709  |
| LmjF05.1020 | <i>L. major</i> | 48  | 740  | 787  |
| LmjF05.1020 | <i>L. major</i> | 55  | 810  | 864  |
| LmjF05.1030 | <i>L. major</i> | 50  | 24   | 73   |
| LmjF05.1040 | <i>L. major</i> | 44  | 11   | 54   |
| LmjF05.1040 | <i>L. major</i> | 61  | 212  | 272  |
| LmjF05.1040 | <i>L. major</i> | 61  | 212  | 272  |
| LmjF05.1050 | <i>L. major</i> | 68  | 1    | 68   |
| LmjF05.1050 | <i>L. major</i> | 41  | 139  | 179  |
| LmjF05.1060 | <i>L. major</i> | 43  | 145  | 187  |
| LmjF05.1060 | <i>L. major</i> | 47  | 404  | 450  |
| LmjF05.1060 | <i>L. major</i> | 47  | 404  | 450  |
| LmjF05.1070 | <i>L. major</i> | 98  | 150  | 247  |
| LmjF05.1080 | <i>L. major</i> | 62  | 1    | 62   |
| LmjF05.1080 | <i>L. major</i> | 73  | 137  | 209  |
| LmjF05.1080 | <i>L. major</i> | 54  | 535  | 588  |
| LmjF05.1080 | <i>L. major</i> | 66  | 661  | 726  |
| LmjF05.1090 | <i>L. major</i> | 195 | 188  | 382  |
| LmjF05.1090 | <i>L. major</i> | 128 | 392  | 519  |
| LmjF05.1110 | <i>L. major</i> | 120 | 1    | 120  |
| LmjF05.1110 | <i>L. major</i> | 101 | 218  | 318  |
| LmjF05.1110 | <i>L. major</i> | 105 | 389  | 493  |
| LmjF05.1110 | <i>L. major</i> | 224 | 686  | 909  |
| LmjF05.1110 | <i>L. major</i> | 71  | 1065 | 1135 |
| LmjF05.1130 | <i>L. major</i> | 43  | 522  | 564  |
| LmjF05.1160 | <i>L. major</i> | 225 | 99   | 323  |
| LmjF05.1160 | <i>L. major</i> | 169 | 356  | 524  |
| LmjF05.1160 | <i>L. major</i> | 191 | 541  | 731  |
| LmjF05.1160 | <i>L. major</i> | 85  | 752  | 836  |
| LmjF05.1180 | <i>L. major</i> | 100 | 1    | 100  |
| LmjF05.1180 | <i>L. major</i> | 48  | 248  | 295  |
| LmjF05.1180 | <i>L. major</i> | 135 | 324  | 458  |
| LmjF05.1190 | <i>L. major</i> | 66  | 1    | 66   |
| LmjF05.1190 | <i>L. major</i> | 63  | 221  | 283  |
| LmjF05.1190 | <i>L. major</i> | 40  | 449  | 488  |
| LmjF05.1190 | <i>L. major</i> | 121 | 551  | 671  |

|             |                 |     |      |      |
|-------------|-----------------|-----|------|------|
| LmjF05.1190 | <i>L. major</i> | 52  | 730  | 781  |
| LmjF05.1190 | <i>L. major</i> | 66  | 848  | 913  |
| LmjF05.1190 | <i>L. major</i> | 84  | 956  | 1039 |
| LmjF05.1190 | <i>L. major</i> | 97  | 1206 | 1302 |
| LmjF05.1190 | <i>L. major</i> | 289 | 1325 | 1613 |
| LmjF05.1190 | <i>L. major</i> | 336 | 1625 | 1960 |
| LmjF05.1200 | <i>L. major</i> | 55  | 1    | 55   |
| LmjF05.1200 | <i>L. major</i> | 41  | 92   | 132  |
| LmjF05.1200 | <i>L. major</i> | 41  | 92   | 132  |
| LmjF05.1210 | <i>L. major</i> | 64  | 1    | 64   |
| LmjF05.1220 | <i>L. major</i> | 42  | 407  | 448  |
| LmjF05.1230 | <i>L. major</i> | 112 | 45   | 156  |
| LmjF06.0010 | <i>L. major</i> | 46  | 1    | 46   |
| LmjF06.0030 | <i>L. major</i> | 67  | 52   | 118  |
| LmjF06.0030 | <i>L. major</i> | 57  | 166  | 222  |
| LmjF06.0030 | <i>L. major</i> | 41  | 324  | 364  |
| LmjF06.0050 | <i>L. major</i> | 141 | 1    | 141  |
| LmjF06.0060 | <i>L. major</i> | 103 | 56   | 158  |
| LmjF06.0060 | <i>L. major</i> | 94  | 228  | 321  |
| LmjF06.0060 | <i>L. major</i> | 94  | 228  | 321  |
| LmjF06.0080 | <i>L. major</i> | 45  | 15   | 59   |
| LmjF06.0090 | <i>L. major</i> | 60  | 1    | 60   |
| LmjF06.0110 | <i>L. major</i> | 94  | 104  | 197  |
| LmjF06.0110 | <i>L. major</i> | 100 | 342  | 441  |
| LmjF06.0110 | <i>L. major</i> | 100 | 342  | 441  |
| LmjF06.0170 | <i>L. major</i> | 43  | 53   | 95   |
| LmjF06.0180 | <i>L. major</i> | 52  | 51   | 102  |
| LmjF06.0180 | <i>L. major</i> | 53  | 187  | 239  |
| LmjF06.0180 | <i>L. major</i> | 122 | 326  | 447  |
| LmjF06.0180 | <i>L. major</i> | 167 | 506  | 672  |
| LmjF06.0190 | <i>L. major</i> | 79  | 101  | 179  |
| LmjF06.0190 | <i>L. major</i> | 60  | 225  | 284  |
| LmjF06.0190 | <i>L. major</i> | 174 | 319  | 492  |
| LmjF06.0190 | <i>L. major</i> | 54  | 534  | 587  |
| LmjF06.0200 | <i>L. major</i> | 331 | 1    | 331  |
| LmjF06.0210 | <i>L. major</i> | 72  | 62   | 133  |
| LmjF06.0210 | <i>L. major</i> | 78  | 203  | 280  |
| LmjF06.0210 | <i>L. major</i> | 91  | 288  | 378  |
| LmjF06.0210 | <i>L. major</i> | 57  | 395  | 451  |
| LmjF06.0210 | <i>L. major</i> | 54  | 562  | 615  |
| LmjF06.0220 | <i>L. major</i> | 76  | 212  | 287  |
| LmjF06.0230 | <i>L. major</i> | 111 | 1    | 111  |
| LmjF06.0240 | <i>L. major</i> | 52  | 551  | 602  |
| LmjF06.0240 | <i>L. major</i> | 47  | 650  | 696  |
| LmjF06.0240 | <i>L. major</i> | 96  | 702  | 797  |
| LmjF06.0250 | <i>L. major</i> | 144 | 113  | 256  |
| LmjF06.0260 | <i>L. major</i> | 50  | 1061 | 1110 |

|             |                 |     |      |      |
|-------------|-----------------|-----|------|------|
| LmjF06.0260 | <i>L. major</i> | 262 | 1180 | 1441 |
| LmjF06.0270 | <i>L. major</i> | 67  | 103  | 169  |
| LmjF06.0270 | <i>L. major</i> | 43  | 189  | 231  |
| LmjF06.0270 | <i>L. major</i> | 43  | 189  | 231  |
| LmjF06.0280 | <i>L. major</i> | 77  | 78   | 154  |
| LmjF06.0280 | <i>L. major</i> | 61  | 217  | 277  |
| LmjF06.0280 | <i>L. major</i> | 94  | 525  | 618  |
| LmjF06.0280 | <i>L. major</i> | 64  | 662  | 725  |
| LmjF06.0280 | <i>L. major</i> | 100 | 741  | 840  |
| LmjF06.0310 | <i>L. major</i> | 70  | 286  | 355  |
| LmjF06.0320 | <i>L. major</i> | 108 | 12   | 119  |
| LmjF06.0320 | <i>L. major</i> | 162 | 132  | 293  |
| LmjF06.0320 | <i>L. major</i> | 380 | 302  | 681  |
| LmjF06.0320 | <i>L. major</i> | 182 | 691  | 872  |
| LmjF06.0320 | <i>L. major</i> | 42  | 899  | 940  |
| LmjF06.0330 | <i>L. major</i> | 156 | 311  | 466  |
| LmjF06.0330 | <i>L. major</i> | 87  | 790  | 876  |
| LmjF06.0330 | <i>L. major</i> | 179 | 885  | 1063 |
| LmjF06.0340 | <i>L. major</i> | 49  | 34   | 82   |
| LmjF06.0340 | <i>L. major</i> | 48  | 858  | 905  |
| LmjF06.0340 | <i>L. major</i> | 48  | 858  | 905  |
| LmjF06.0380 | <i>L. major</i> | 44  | 29   | 72   |
| LmjF06.0380 | <i>L. major</i> | 68  | 311  | 378  |
| LmjF06.0380 | <i>L. major</i> | 68  | 311  | 378  |
| LmjF06.0390 | <i>L. major</i> | 47  | 385  | 431  |
| LmjF06.0390 | <i>L. major</i> | 41  | 475  | 515  |
| LmjF06.0390 | <i>L. major</i> | 101 | 646  | 746  |
| LmjF06.0390 | <i>L. major</i> | 57  | 778  | 834  |
| LmjF06.0390 | <i>L. major</i> | 66  | 842  | 907  |
| LmjF06.0410 | <i>L. major</i> | 63  | 74   | 136  |
| LmjF06.0410 | <i>L. major</i> | 116 | 152  | 267  |
| LmjF06.0412 | <i>L. major</i> | 131 | 35   | 165  |
| LmjF06.0415 | <i>L. major</i> | 63  | 54   | 116  |
| LmjF06.0415 | <i>L. major</i> | 123 | 132  | 254  |
| LmjF06.0420 | <i>L. major</i> | 55  | 19   | 73   |
| LmjF06.0420 | <i>L. major</i> | 314 | 139  | 452  |
| LmjF06.0420 | <i>L. major</i> | 75  | 499  | 573  |
| LmjF06.0430 | <i>L. major</i> | 114 | 1    | 114  |
| LmjF06.0430 | <i>L. major</i> | 87  | 178  | 264  |
| LmjF06.0430 | <i>L. major</i> | 118 | 477  | 594  |
| LmjF06.0430 | <i>L. major</i> | 82  | 609  | 690  |
| LmjF06.0440 | <i>L. major</i> | 118 | 17   | 134  |
| LmjF06.0440 | <i>L. major</i> | 44  | 292  | 335  |
| LmjF06.0440 | <i>L. major</i> | 314 | 423  | 736  |
| LmjF06.0440 | <i>L. major</i> | 116 | 747  | 862  |
| LmjF06.0440 | <i>L. major</i> | 92  | 902  | 993  |
| LmjF06.0450 | <i>L. major</i> | 167 | 1    | 167  |

|             |                 |     |      |      |
|-------------|-----------------|-----|------|------|
| LmjF06.0450 | <i>L. major</i> | 45  | 179  | 223  |
| LmjF06.0450 | <i>L. major</i> | 119 | 234  | 352  |
| LmjF06.0460 | <i>L. major</i> | 153 | 32   | 184  |
| LmjF06.0460 | <i>L. major</i> | 177 | 307  | 483  |
| LmjF06.0460 | <i>L. major</i> | 279 | 497  | 775  |
| LmjF06.0460 | <i>L. major</i> | 80  | 783  | 862  |
| LmjF06.0460 | <i>L. major</i> | 69  | 931  | 999  |
| LmjF06.0470 | <i>L. major</i> | 110 | 1    | 110  |
| LmjF06.0470 | <i>L. major</i> | 85  | 176  | 260  |
| LmjF06.0470 | <i>L. major</i> | 56  | 305  | 360  |
| LmjF06.0470 | <i>L. major</i> | 197 | 373  | 569  |
| LmjF06.0470 | <i>L. major</i> | 105 | 599  | 703  |
| LmjF06.0470 | <i>L. major</i> | 69  | 794  | 862  |
| LmjF06.0470 | <i>L. major</i> | 106 | 864  | 969  |
| LmjF06.0470 | <i>L. major</i> | 95  | 1006 | 1100 |
| LmjF06.0500 | <i>L. major</i> | 58  | 47   | 104  |
| LmjF06.0500 | <i>L. major</i> | 50  | 124  | 173  |
| LmjF06.0500 | <i>L. major</i> | 93  | 307  | 399  |
| LmjF06.0500 | <i>L. major</i> | 75  | 429  | 503  |
| LmjF06.0510 | <i>L. major</i> | 44  | 80   | 123  |
| LmjF06.0510 | <i>L. major</i> | 79  | 293  | 371  |
| LmjF06.0510 | <i>L. major</i> | 77  | 507  | 583  |
| LmjF06.0520 | <i>L. major</i> | 44  | 1    | 44   |
| LmjF06.0520 | <i>L. major</i> | 304 | 106  | 409  |
| LmjF06.0520 | <i>L. major</i> | 210 | 446  | 655  |
| LmjF06.0520 | <i>L. major</i> | 160 | 682  | 841  |
| LmjF06.0520 | <i>L. major</i> | 254 | 872  | 1125 |
| LmjF06.0520 | <i>L. major</i> | 79  | 1256 | 1334 |
| LmjF06.0520 | <i>L. major</i> | 73  | 1392 | 1464 |
| LmjF06.0530 | <i>L. major</i> | 52  | 1    | 52   |
| LmjF06.0530 | <i>L. major</i> | 100 | 98   | 197  |
| LmjF06.0540 | <i>L. major</i> | 133 | 34   | 166  |
| LmjF06.0540 | <i>L. major</i> | 297 | 416  | 712  |
| LmjF06.0540 | <i>L. major</i> | 41  | 723  | 763  |
| LmjF06.0550 | <i>L. major</i> | 132 | 1    | 132  |
| LmjF06.0550 | <i>L. major</i> | 77  | 214  | 290  |
| LmjF06.0550 | <i>L. major</i> | 58  | 299  | 356  |
| LmjF06.0550 | <i>L. major</i> | 61  | 365  | 425  |
| LmjF06.0550 | <i>L. major</i> | 61  | 568  | 628  |
| LmjF06.0550 | <i>L. major</i> | 60  | 743  | 802  |
| LmjF06.0550 | <i>L. major</i> | 91  | 824  | 914  |
| LmjF06.0550 | <i>L. major</i> | 116 | 1133 | 1248 |
| LmjF06.0550 | <i>L. major</i> | 58  | 1554 | 1611 |
| LmjF06.0550 | <i>L. major</i> | 51  | 1670 | 1720 |
| LmjF06.0570 | <i>L. major</i> | 56  | 1    | 56   |
| LmjF06.0580 | <i>L. major</i> | 56  | 1    | 56   |
| LmjF06.0590 | <i>L. major</i> | 74  | 81   | 154  |

|             |                 |     |      |      |
|-------------|-----------------|-----|------|------|
| LmjF06.0590 | <i>L. major</i> | 68  | 241  | 308  |
| LmjF06.0590 | <i>L. major</i> | 107 | 443  | 549  |
| LmjF06.0590 | <i>L. major</i> | 282 | 555  | 836  |
| LmjF06.0590 | <i>L. major</i> | 650 | 845  | 1494 |
| LmjF06.0600 | <i>L. major</i> | 69  | 175  | 243  |
| LmjF06.0600 | <i>L. major</i> | 203 | 272  | 474  |
| LmjF06.0600 | <i>L. major</i> | 61  | 487  | 547  |
| LmjF06.0600 | <i>L. major</i> | 69  | 600  | 668  |
| LmjF06.0600 | <i>L. major</i> | 41  | 817  | 857  |
| LmjF06.0600 | <i>L. major</i> | 59  | 875  | 933  |
| LmjF06.0600 | <i>L. major</i> | 93  | 960  | 1052 |
| LmjF06.0600 | <i>L. major</i> | 119 | 1138 | 1256 |
| LmjF06.0600 | <i>L. major</i> | 103 | 1262 | 1364 |
| LmjF06.0610 | <i>L. major</i> | 51  | 1    | 51   |
| LmjF06.0620 | <i>L. major</i> | 44  | 515  | 558  |
| LmjF06.0630 | <i>L. major</i> | 102 | 1    | 102  |
| LmjF06.0630 | <i>L. major</i> | 42  | 148  | 189  |
| LmjF06.0630 | <i>L. major</i> | 40  | 277  | 316  |
| LmjF06.0630 | <i>L. major</i> | 220 | 372  | 591  |
| LmjF06.0630 | <i>L. major</i> | 229 | 735  | 963  |
| LmjF06.0630 | <i>L. major</i> | 138 | 985  | 1122 |
| LmjF06.0630 | <i>L. major</i> | 166 | 1152 | 1317 |
| LmjF06.0630 | <i>L. major</i> | 118 | 1460 | 1577 |
| LmjF06.0630 | <i>L. major</i> | 59  | 1624 | 1682 |
| LmjF06.0640 | <i>L. major</i> | 155 | 1    | 155  |
| LmjF06.0640 | <i>L. major</i> | 40  | 159  | 198  |
| LmjF06.0640 | <i>L. major</i> | 56  | 499  | 554  |
| LmjF06.0640 | <i>L. major</i> | 279 | 612  | 890  |
| LmjF06.0640 | <i>L. major</i> | 86  | 957  | 1042 |
| LmjF06.0640 | <i>L. major</i> | 124 | 1173 | 1296 |
| LmjF06.0640 | <i>L. major</i> | 150 | 1331 | 1480 |
| LmjF06.0640 | <i>L. major</i> | 287 | 1504 | 1790 |
| LmjF06.0640 | <i>L. major</i> | 55  | 1832 | 1886 |
| LmjF06.0640 | <i>L. major</i> | 537 | 1918 | 2454 |
| LmjF06.0640 | <i>L. major</i> | 48  | 2491 | 2538 |
| LmjF06.0640 | <i>L. major</i> | 113 | 2592 | 2704 |
| LmjF06.0640 | <i>L. major</i> | 158 | 2985 | 3142 |
| LmjF06.0650 | <i>L. major</i> | 44  | 1    | 44   |
| LmjF06.0660 | <i>L. major</i> | 372 | 1    | 372  |
| LmjF06.0660 | <i>L. major</i> | 70  | 382  | 451  |
| LmjF06.0660 | <i>L. major</i> | 129 | 486  | 614  |
| LmjF06.0670 | <i>L. major</i> | 273 | 1    | 273  |
| LmjF06.0670 | <i>L. major</i> | 87  | 275  | 361  |
| LmjF06.0670 | <i>L. major</i> | 736 | 365  | 1100 |
| LmjF06.0670 | <i>L. major</i> | 136 | 1147 | 1282 |
| LmjF06.0680 | <i>L. major</i> | 99  | 1    | 99   |
| LmjF06.0685 | <i>L. major</i> | 164 | 25   | 188  |



|             |                 |     |      |      |
|-------------|-----------------|-----|------|------|
| LmjF06.0685 | <i>L. major</i> | 91  | 202  | 292  |
| LmjF06.0685 | <i>L. major</i> | 79  | 297  | 375  |
| LmjF06.0690 | <i>L. major</i> | 61  | 61   | 121  |
| LmjF06.0690 | <i>L. major</i> | 49  | 282  | 330  |
| LmjF06.0690 | <i>L. major</i> | 53  | 367  | 419  |
| LmjF06.0690 | <i>L. major</i> | 45  | 563  | 607  |
| LmjF06.0690 | <i>L. major</i> | 60  | 862  | 921  |
| LmjF06.0690 | <i>L. major</i> | 54  | 979  | 1032 |
| LmjF06.0690 | <i>L. major</i> | 75  | 1272 | 1346 |
| LmjF06.0690 | <i>L. major</i> | 47  | 1620 | 1666 |
| LmjF06.0690 | <i>L. major</i> | 67  | 2037 | 2103 |
| LmjF06.0690 | <i>L. major</i> | 212 | 2145 | 2356 |
| LmjF06.0700 | <i>L. major</i> | 468 | 130  | 597  |
| LmjF06.0710 | <i>L. major</i> | 52  | 1    | 52   |
| LmjF06.0710 | <i>L. major</i> | 90  | 193  | 282  |
| LmjF06.0710 | <i>L. major</i> | 157 | 372  | 528  |
| LmjF06.0720 | <i>L. major</i> | 62  | 1    | 62   |
| LmjF06.0720 | <i>L. major</i> | 542 | 91   | 632  |
| LmjF06.0720 | <i>L. major</i> | 46  | 645  | 690  |
| LmjF06.0720 | <i>L. major</i> | 76  | 721  | 796  |
| LmjF06.0720 | <i>L. major</i> | 84  | 842  | 925  |
| LmjF06.0720 | <i>L. major</i> | 52  | 1005 | 1056 |
| LmjF06.0720 | <i>L. major</i> | 194 | 1084 | 1277 |
| LmjF06.0720 | <i>L. major</i> | 85  | 1345 | 1429 |
| LmjF06.0720 | <i>L. major</i> | 78  | 1609 | 1686 |
| LmjF06.0740 | <i>L. major</i> | 671 | 1    | 671  |
| LmjF06.0740 | <i>L. major</i> | 90  | 709  | 798  |
| LmjF06.0740 | <i>L. major</i> | 131 | 810  | 940  |
| LmjF06.0740 | <i>L. major</i> | 58  | 980  | 1037 |
| LmjF06.0750 | <i>L. major</i> | 129 | 129  | 257  |
| LmjF06.0750 | <i>L. major</i> | 60  | 387  | 446  |
| LmjF06.0750 | <i>L. major</i> | 71  | 535  | 605  |
| LmjF06.0760 | <i>L. major</i> | 164 | 1    | 164  |
| LmjF06.0760 | <i>L. major</i> | 108 | 170  | 277  |
| LmjF06.0760 | <i>L. major</i> | 66  | 316  | 381  |
| LmjF06.0760 | <i>L. major</i> | 393 | 469  | 861  |
| LmjF06.0760 | <i>L. major</i> | 107 | 882  | 988  |
| LmjF06.0760 | <i>L. major</i> | 162 | 1017 | 1178 |
| LmjF06.0770 | <i>L. major</i> | 101 | 1    | 101  |
| LmjF06.0770 | <i>L. major</i> | 446 | 107  | 552  |
| LmjF06.0770 | <i>L. major</i> | 176 | 566  | 741  |
| LmjF06.0770 | <i>L. major</i> | 322 | 806  | 1127 |
| LmjF06.0770 | <i>L. major</i> | 75  | 1205 | 1279 |
| LmjF06.0770 | <i>L. major</i> | 133 | 1374 | 1506 |
| LmjF06.0770 | <i>L. major</i> | 471 | 1538 | 2008 |
| LmjF06.0780 | <i>L. major</i> | 578 | 1    | 578  |
| LmjF06.0780 | <i>L. major</i> | 859 | 580  | 1438 |

|             |                 |     |      |      |
|-------------|-----------------|-----|------|------|
| LmjF06.0780 | <i>L. major</i> | 206 | 1448 | 1653 |
| LmjF06.0780 | <i>L. major</i> | 193 | 1729 | 1921 |
| LmjF06.0780 | <i>L. major</i> | 132 | 1935 | 2066 |
| LmjF06.0780 | <i>L. major</i> | 298 | 2103 | 2400 |
| LmjF06.0780 | <i>L. major</i> | 367 | 2417 | 2783 |
| LmjF06.0790 | <i>L. major</i> | 366 | 66   | 431  |
| LmjF06.0790 | <i>L. major</i> | 368 | 441  | 808  |
| LmjF06.0790 | <i>L. major</i> | 252 | 822  | 1073 |
| LmjF06.0800 | <i>L. major</i> | 495 | 1    | 495  |
| LmjF06.0800 | <i>L. major</i> | 172 | 600  | 771  |
| LmjF06.0800 | <i>L. major</i> | 203 | 786  | 988  |
| LmjF06.0800 | <i>L. major</i> | 114 | 1016 | 1129 |
| LmjF06.0800 | <i>L. major</i> | 76  | 1193 | 1268 |
| LmjF06.0800 | <i>L. major</i> | 42  | 1353 | 1394 |
| LmjF06.0800 | <i>L. major</i> | 117 | 1402 | 1518 |
| LmjF06.0810 | <i>L. major</i> | 86  | 1    | 86   |
| LmjF06.0810 | <i>L. major</i> | 54  | 139  | 192  |
| LmjF06.0810 | <i>L. major</i> | 56  | 197  | 252  |
| LmjF06.0810 | <i>L. major</i> | 200 | 375  | 574  |
| LmjF06.0810 | <i>L. major</i> | 70  | 677  | 746  |
| LmjF06.0810 | <i>L. major</i> | 57  | 1134 | 1190 |
| LmjF06.0810 | <i>L. major</i> | 47  | 1319 | 1365 |
| LmjF06.0810 | <i>L. major</i> | 57  | 1493 | 1549 |
| LmjF06.0810 | <i>L. major</i> | 87  | 1560 | 1646 |
| LmjF06.0810 | <i>L. major</i> | 47  | 2197 | 2243 |
| LmjF06.0810 | <i>L. major</i> | 64  | 2370 | 2433 |
| LmjF06.0810 | <i>L. major</i> | 125 | 2491 | 2615 |
| LmjF06.0810 | <i>L. major</i> | 49  | 2650 | 2698 |
| LmjF06.0810 | <i>L. major</i> | 43  | 2751 | 2793 |
| LmjF06.0810 | <i>L. major</i> | 95  | 2931 | 3025 |
| LmjF06.0810 | <i>L. major</i> | 99  | 3124 | 3222 |
| LmjF06.0820 | <i>L. major</i> | 187 | 1    | 187  |
| LmjF06.0820 | <i>L. major</i> | 73  | 228  | 300  |
| LmjF06.0830 | <i>L. major</i> | 42  | 88   | 129  |
| LmjF06.0830 | <i>L. major</i> | 304 | 157  | 460  |
| LmjF06.0830 | <i>L. major</i> | 126 | 497  | 622  |
| LmjF06.0830 | <i>L. major</i> | 234 | 864  | 1097 |
| LmjF06.0830 | <i>L. major</i> | 337 | 1115 | 1451 |
| LmjF06.0840 | <i>L. major</i> | 161 | 73   | 233  |
| LmjF06.0850 | <i>L. major</i> | 49  | 1    | 49   |
| LmjF06.0850 | <i>L. major</i> | 456 | 51   | 506  |
| LmjF06.0850 | <i>L. major</i> | 278 | 518  | 795  |
| LmjF06.0850 | <i>L. major</i> | 51  | 881  | 931  |
| LmjF06.0850 | <i>L. major</i> | 85  | 1001 | 1085 |
| LmjF06.0850 | <i>L. major</i> | 95  | 1129 | 1223 |
| LmjF06.0850 | <i>L. major</i> | 131 | 1228 | 1358 |
| LmjF06.0850 | <i>L. major</i> | 84  | 1386 | 1469 |

|             |                 |     |      |      |
|-------------|-----------------|-----|------|------|
| LmjF06.0850 | <i>L. major</i> | 91  | 1516 | 1606 |
| LmjF06.0850 | <i>L. major</i> | 268 | 1683 | 1950 |
| LmjF06.0850 | <i>L. major</i> | 383 | 1963 | 2345 |
| LmjF06.0850 | <i>L. major</i> | 203 | 2377 | 2579 |
| LmjF06.0850 | <i>L. major</i> | 45  | 2583 | 2627 |
| LmjF06.0850 | <i>L. major</i> | 140 | 2696 | 2835 |
| LmjF06.0850 | <i>L. major</i> | 42  | 2914 | 2955 |
| LmjF06.0850 | <i>L. major</i> | 190 | 3154 | 3343 |
| LmjF06.0870 | <i>L. major</i> | 72  | 1    | 72   |
| LmjF06.0870 | <i>L. major</i> | 40  | 399  | 438  |
| LmjF06.0870 | <i>L. major</i> | 40  | 399  | 438  |
| LmjF06.0880 | <i>L. major</i> | 40  | 1    | 40   |
| LmjF06.0890 | <i>L. major</i> | 120 | 22   | 141  |
| LmjF06.0890 | <i>L. major</i> | 102 | 228  | 329  |
| LmjF06.0890 | <i>L. major</i> | 62  | 427  | 488  |
| LmjF06.0890 | <i>L. major</i> | 208 | 530  | 737  |
| LmjF06.0900 | <i>L. major</i> | 180 | 1    | 180  |
| LmjF06.0900 | <i>L. major</i> | 498 | 212  | 709  |
| LmjF06.0900 | <i>L. major</i> | 428 | 748  | 1175 |
| LmjF06.0900 | <i>L. major</i> | 58  | 1214 | 1271 |
| LmjF06.0900 | <i>L. major</i> | 73  | 1322 | 1394 |
| LmjF06.0900 | <i>L. major</i> | 183 | 1475 | 1657 |
| LmjF06.0900 | <i>L. major</i> | 115 | 1707 | 1821 |
| LmjF06.0920 | <i>L. major</i> | 147 | 250  | 396  |
| LmjF06.0940 | <i>L. major</i> | 64  | 25   | 88   |
| LmjF06.0940 | <i>L. major</i> | 51  | 155  | 205  |
| LmjF06.0940 | <i>L. major</i> | 45  | 254  | 298  |
| LmjF06.0940 | <i>L. major</i> | 68  | 321  | 388  |
| LmjF06.0940 | <i>L. major</i> | 67  | 527  | 593  |
| LmjF06.0970 | <i>L. major</i> | 96  | 1    | 96   |
| LmjF06.0970 | <i>L. major</i> | 54  | 277  | 330  |
| LmjF06.0970 | <i>L. major</i> | 222 | 433  | 654  |
| LmjF06.0970 | <i>L. major</i> | 85  | 696  | 780  |
| LmjF06.0970 | <i>L. major</i> | 114 | 1218 | 1331 |
| LmjF06.0970 | <i>L. major</i> | 130 | 1374 | 1503 |
| LmjF06.0980 | <i>L. major</i> | 52  | 1    | 52   |
| LmjF06.0980 | <i>L. major</i> | 52  | 296  | 347  |
| LmjF06.0980 | <i>L. major</i> | 74  | 798  | 871  |
| LmjF06.0990 | <i>L. major</i> | 99  | 1    | 99   |
| LmjF06.0990 | <i>L. major</i> | 77  | 173  | 249  |
| LmjF06.0990 | <i>L. major</i> | 163 | 874  | 1036 |
| LmjF06.0995 | <i>L. major</i> | 47  | 69   | 115  |
| LmjF06.1000 | <i>L. major</i> | 89  | 83   | 171  |
| LmjF06.1010 | <i>L. major</i> | 42  | 23   | 64   |
| LmjF06.1010 | <i>L. major</i> | 68  | 118  | 185  |
| LmjF06.1010 | <i>L. major</i> | 45  | 559  | 603  |
| LmjF06.1020 | <i>L. major</i> | 151 | 80   | 230  |

|             |                 |     |     |      |
|-------------|-----------------|-----|-----|------|
| LmjF06.1030 | <i>L. major</i> | 43  | 154 | 196  |
| LmjF06.1030 | <i>L. major</i> | 82  | 381 | 462  |
| LmjF06.1030 | <i>L. major</i> | 227 | 471 | 697  |
| LmjF06.1030 | <i>L. major</i> | 127 | 708 | 834  |
| LmjF06.1030 | <i>L. major</i> | 42  | 845 | 886  |
| LmjF06.1040 | <i>L. major</i> | 188 | 1   | 188  |
| LmjF06.1040 | <i>L. major</i> | 142 | 274 | 415  |
| LmjF06.1040 | <i>L. major</i> | 88  | 480 | 567  |
| LmjF06.1040 | <i>L. major</i> | 63  | 621 | 683  |
| LmjF06.1060 | <i>L. major</i> | 41  | 1   | 41   |
| LmjF06.1060 | <i>L. major</i> | 52  | 271 | 322  |
| LmjF06.1060 | <i>L. major</i> | 52  | 271 | 322  |
| LmjF06.1090 | <i>L. major</i> | 145 | 1   | 145  |
| LmjF06.1090 | <i>L. major</i> | 80  | 186 | 265  |
| LmjF06.1090 | <i>L. major</i> | 104 | 282 | 385  |
| LmjF06.1090 | <i>L. major</i> | 133 | 463 | 595  |
| LmjF06.1100 | <i>L. major</i> | 42  | 263 | 304  |
| LmjF06.1110 | <i>L. major</i> | 134 | 1   | 134  |
| LmjF06.1110 | <i>L. major</i> | 720 | 205 | 924  |
| LmjF06.1110 | <i>L. major</i> | 125 | 984 | 1108 |
| LmjF06.1140 | <i>L. major</i> | 101 | 79  | 179  |
| LmjF06.1140 | <i>L. major</i> | 52  | 224 | 275  |
| LmjF06.1140 | <i>L. major</i> | 169 | 398 | 566  |
| LmjF06.1140 | <i>L. major</i> | 44  | 804 | 847  |
| LmjF06.1150 | <i>L. major</i> | 95  | 98  | 192  |
| LmjF06.1150 | <i>L. major</i> | 101 | 238 | 338  |
| LmjF06.1150 | <i>L. major</i> | 65  | 445 | 509  |
| LmjF06.1160 | <i>L. major</i> | 59  | 66  | 124  |
| LmjF06.1160 | <i>L. major</i> | 70  | 133 | 202  |
| LmjF06.1160 | <i>L. major</i> | 43  | 497 | 539  |
| LmjF06.1160 | <i>L. major</i> | 40  | 559 | 598  |
| LmjF06.1180 | <i>L. major</i> | 54  | 220 | 273  |
| LmjF06.1190 | <i>L. major</i> | 45  | 1   | 45   |
| LmjF06.1200 | <i>L. major</i> | 83  | 1   | 83   |
| LmjF06.1200 | <i>L. major</i> | 58  | 152 | 209  |
| LmjF06.1200 | <i>L. major</i> | 146 | 230 | 375  |
| LmjF06.1210 | <i>L. major</i> | 55  | 452 | 506  |
| LmjF06.1220 | <i>L. major</i> | 76  | 80  | 155  |
| LmjF06.1220 | <i>L. major</i> | 74  | 377 | 450  |
| LmjF06.1220 | <i>L. major</i> | 210 | 515 | 724  |
| LmjF06.1220 | <i>L. major</i> | 62  | 729 | 790  |
| LmjF06.1240 | <i>L. major</i> | 45  | 10  | 54   |
| LmjF06.1240 | <i>L. major</i> | 43  | 307 | 349  |
| LmjF06.1240 | <i>L. major</i> | 43  | 307 | 349  |
| LmjF06.1245 | <i>L. major</i> | 42  | 79  | 120  |
| LmjF06.1250 | <i>L. major</i> | 52  | 1   | 52   |
| LmjF06.1260 | <i>L. major</i> | 49  | 270 | 318  |

|             |                 |     |      |      |
|-------------|-----------------|-----|------|------|
| LmjF06.1300 | <i>L. major</i> | 58  | 1    | 58   |
| LmjF06.1300 | <i>L. major</i> | 72  | 504  | 575  |
| LmjF06.1300 | <i>L. major</i> | 72  | 504  | 575  |
| LmjF07.0020 | <i>L. major</i> | 48  | 43   | 90   |
| LmjF07.0020 | <i>L. major</i> | 57  | 169  | 225  |
| LmjF07.0020 | <i>L. major</i> | 57  | 169  | 225  |
| LmjF07.0040 | <i>L. major</i> | 71  | 245  | 315  |
| LmjF07.0050 | <i>L. major</i> | 48  | 644  | 691  |
| LmjF07.0060 | <i>L. major</i> | 49  | 69   | 117  |
| LmjF07.0070 | <i>L. major</i> | 61  | 11   | 71   |
| LmjF07.0080 | <i>L. major</i> | 45  | 401  | 445  |
| LmjF07.0090 | <i>L. major</i> | 40  | 633  | 672  |
| LmjF07.0100 | <i>L. major</i> | 81  | 496  | 576  |
| LmjF07.0120 | <i>L. major</i> | 134 | 31   | 164  |
| LmjF07.0120 | <i>L. major</i> | 45  | 408  | 452  |
| LmjF07.0120 | <i>L. major</i> | 71  | 642  | 712  |
| LmjF07.0120 | <i>L. major</i> | 62  | 964  | 1025 |
| LmjF07.0120 | <i>L. major</i> | 47  | 1771 | 1817 |
| LmjF07.0120 | <i>L. major</i> | 52  | 1981 | 2032 |
| LmjF07.0120 | <i>L. major</i> | 67  | 2128 | 2194 |
| LmjF07.0130 | <i>L. major</i> | 91  | 276  | 366  |
| LmjF07.0140 | <i>L. major</i> | 87  | 265  | 351  |
| LmjF07.0150 | <i>L. major</i> | 58  | 20   | 77   |
| LmjF07.0150 | <i>L. major</i> | 84  | 503  | 586  |
| LmjF07.0150 | <i>L. major</i> | 84  | 503  | 586  |
| LmjF07.0160 | <i>L. major</i> | 602 | 246  | 847  |
| LmjF07.0170 | <i>L. major</i> | 125 | 195  | 319  |
| LmjF07.0170 | <i>L. major</i> | 293 | 457  | 749  |
| LmjF07.0170 | <i>L. major</i> | 146 | 829  | 974  |
| LmjF07.0180 | <i>L. major</i> | 41  | 1    | 41   |
| LmjF07.0180 | <i>L. major</i> | 71  | 73   | 143  |
| LmjF07.0180 | <i>L. major</i> | 121 | 245  | 365  |
| LmjF07.0180 | <i>L. major</i> | 60  | 408  | 467  |
| LmjF07.0180 | <i>L. major</i> | 42  | 495  | 536  |
| LmjF07.0180 | <i>L. major</i> | 481 | 736  | 1216 |
| LmjF07.0180 | <i>L. major</i> | 149 | 1301 | 1449 |
| LmjF07.0180 | <i>L. major</i> | 58  | 1478 | 1535 |
| LmjF07.0180 | <i>L. major</i> | 40  | 1641 | 1680 |
| LmjF07.0180 | <i>L. major</i> | 74  | 1708 | 1781 |
| LmjF07.0180 | <i>L. major</i> | 92  | 1856 | 1947 |
| LmjF07.0180 | <i>L. major</i> | 41  | 1984 | 2024 |
| LmjF07.0200 | <i>L. major</i> | 43  | 41   | 83   |
| LmjF07.0200 | <i>L. major</i> | 70  | 204  | 273  |
| LmjF07.0200 | <i>L. major</i> | 74  | 379  | 452  |
| LmjF07.0210 | <i>L. major</i> | 45  | 182  | 226  |
| LmjF07.0220 | <i>L. major</i> | 90  | 48   | 137  |
| LmjF07.0220 | <i>L. major</i> | 50  | 175  | 224  |

|             |                 |     |      |      |
|-------------|-----------------|-----|------|------|
| LmjF07.0220 | <i>L. major</i> | 40  | 596  | 635  |
| LmjF07.0230 | <i>L. major</i> | 82  | 1    | 82   |
| LmjF07.0240 | <i>L. major</i> | 79  | 149  | 227  |
| LmjF07.0240 | <i>L. major</i> | 67  | 373  | 439  |
| LmjF07.0250 | <i>L. major</i> | 556 | 1    | 556  |
| LmjF07.0250 | <i>L. major</i> | 233 | 564  | 796  |
| LmjF07.0250 | <i>L. major</i> | 324 | 826  | 1149 |
| LmjF07.0250 | <i>L. major</i> | 57  | 1160 | 1216 |
| LmjF07.0250 | <i>L. major</i> | 129 | 1345 | 1473 |
| LmjF07.0250 | <i>L. major</i> | 42  | 1488 | 1529 |
| LmjF07.0250 | <i>L. major</i> | 144 | 1597 | 1740 |
| LmjF07.0260 | <i>L. major</i> | 43  | 263  | 305  |
| LmjF07.0280 | <i>L. major</i> | 67  | 166  | 232  |
| LmjF07.0280 | <i>L. major</i> | 162 | 334  | 495  |
| LmjF07.0280 | <i>L. major</i> | 49  | 513  | 561  |
| LmjF07.0280 | <i>L. major</i> | 42  | 631  | 672  |
| LmjF07.0280 | <i>L. major</i> | 169 | 827  | 995  |
| LmjF07.0280 | <i>L. major</i> | 54  | 1040 | 1093 |
| LmjF07.0280 | <i>L. major</i> | 143 | 1281 | 1423 |
| LmjF07.0280 | <i>L. major</i> | 62  | 1479 | 1540 |
| LmjF07.0280 | <i>L. major</i> | 41  | 1620 | 1660 |
| LmjF07.0280 | <i>L. major</i> | 101 | 1734 | 1834 |
| LmjF07.0280 | <i>L. major</i> | 224 | 1951 | 2174 |
| LmjF07.0280 | <i>L. major</i> | 93  | 2243 | 2335 |
| LmjF07.0280 | <i>L. major</i> | 111 | 2541 | 2651 |
| LmjF07.0280 | <i>L. major</i> | 44  | 2779 | 2822 |
| LmjF07.0280 | <i>L. major</i> | 242 | 2933 | 3174 |
| LmjF07.0280 | <i>L. major</i> | 86  | 3207 | 3292 |
| LmjF07.0280 | <i>L. major</i> | 96  | 3439 | 3534 |
| LmjF07.0280 | <i>L. major</i> | 41  | 3595 | 3635 |
| LmjF07.0280 | <i>L. major</i> | 123 | 3807 | 3929 |
| LmjF07.0280 | <i>L. major</i> | 83  | 3981 | 4063 |
| LmjF07.0280 | <i>L. major</i> | 431 | 4083 | 4513 |
| LmjF07.0280 | <i>L. major</i> | 262 | 4538 | 4799 |
| LmjF07.0280 | <i>L. major</i> | 94  | 4884 | 4977 |
| LmjF07.0280 | <i>L. major</i> | 154 | 5030 | 5183 |
| LmjF07.0280 | <i>L. major</i> | 60  | 5258 | 5317 |
| LmjF07.0280 | <i>L. major</i> | 47  | 5549 | 5595 |
| LmjF07.0280 | <i>L. major</i> | 81  | 5765 | 5845 |
| LmjF07.0290 | <i>L. major</i> | 41  | 36   | 76   |
| LmjF07.0300 | <i>L. major</i> | 246 | 58   | 303  |
| LmjF07.0300 | <i>L. major</i> | 55  | 434  | 488  |
| LmjF07.0300 | <i>L. major</i> | 91  | 547  | 637  |
| LmjF07.0310 | <i>L. major</i> | 101 | 1    | 101  |
| LmjF07.0310 | <i>L. major</i> | 53  | 243  | 295  |
| LmjF07.0310 | <i>L. major</i> | 46  | 301  | 346  |
| LmjF07.0310 | <i>L. major</i> | 75  | 575  | 649  |

|             |                 |     |      |      |
|-------------|-----------------|-----|------|------|
| LmjF07.0310 | <i>L. major</i> | 88  | 651  | 738  |
| LmjF07.0320 | <i>L. major</i> | 76  | 59   | 134  |
| LmjF07.0320 | <i>L. major</i> | 50  | 510  | 559  |
| LmjF07.0320 | <i>L. major</i> | 196 | 570  | 765  |
| LmjF07.0320 | <i>L. major</i> | 69  | 787  | 855  |
| LmjF07.0330 | <i>L. major</i> | 59  | 141  | 199  |
| LmjF07.0330 | <i>L. major</i> | 85  | 263  | 347  |
| LmjF07.0330 | <i>L. major</i> | 156 | 438  | 593  |
| LmjF07.0335 | <i>L. major</i> | 58  | 61   | 118  |
| LmjF07.0335 | <i>L. major</i> | 55  | 304  | 358  |
| LmjF07.0335 | <i>L. major</i> | 53  | 428  | 480  |
| LmjF07.0335 | <i>L. major</i> | 62  | 583  | 644  |
| LmjF07.0335 | <i>L. major</i> | 71  | 646  | 716  |
| LmjF07.0340 | <i>L. major</i> | 92  | 1    | 92   |
| LmjF07.0340 | <i>L. major</i> | 64  | 529  | 592  |
| LmjF07.0350 | <i>L. major</i> | 162 | 242  | 403  |
| LmjF07.0350 | <i>L. major</i> | 91  | 422  | 512  |
| LmjF07.0350 | <i>L. major</i> | 80  | 577  | 656  |
| LmjF07.0370 | <i>L. major</i> | 376 | 1    | 376  |
| LmjF07.0370 | <i>L. major</i> | 61  | 448  | 508  |
| LmjF07.0370 | <i>L. major</i> | 141 | 639  | 779  |
| LmjF07.0380 | <i>L. major</i> | 42  | 68   | 109  |
| LmjF07.0380 | <i>L. major</i> | 133 | 162  | 294  |
| LmjF07.0380 | <i>L. major</i> | 93  | 393  | 485  |
| LmjF07.0380 | <i>L. major</i> | 90  | 619  | 708  |
| LmjF07.0380 | <i>L. major</i> | 104 | 828  | 931  |
| LmjF07.0380 | <i>L. major</i> | 62  | 969  | 1030 |
| LmjF07.0380 | <i>L. major</i> | 88  | 1203 | 1290 |
| LmjF07.0380 | <i>L. major</i> | 54  | 1609 | 1662 |
| LmjF07.0380 | <i>L. major</i> | 85  | 2107 | 2191 |
| LmjF07.0380 | <i>L. major</i> | 108 | 2251 | 2358 |
| LmjF07.0380 | <i>L. major</i> | 48  | 2421 | 2468 |
| LmjF07.0380 | <i>L. major</i> | 125 | 2485 | 2609 |
| LmjF07.0380 | <i>L. major</i> | 49  | 2738 | 2786 |
| LmjF07.0380 | <i>L. major</i> | 41  | 2799 | 2839 |
| LmjF07.0380 | <i>L. major</i> | 52  | 2864 | 2915 |
| LmjF07.0380 | <i>L. major</i> | 42  | 3115 | 3156 |
| LmjF07.0380 | <i>L. major</i> | 67  | 3450 | 3516 |
| LmjF07.0390 | <i>L. major</i> | 43  | 63   | 105  |
| LmjF07.0390 | <i>L. major</i> | 94  | 124  | 217  |
| LmjF07.0390 | <i>L. major</i> | 91  | 287  | 377  |
| LmjF07.0390 | <i>L. major</i> | 77  | 462  | 538  |
| LmjF07.0390 | <i>L. major</i> | 46  | 884  | 929  |
| LmjF07.0400 | <i>L. major</i> | 248 | 127  | 374  |
| LmjF07.0420 | <i>L. major</i> | 51  | 59   | 109  |
| LmjF07.0470 | <i>L. major</i> | 68  | 29   | 96   |
| LmjF07.0470 | <i>L. major</i> | 51  | 446  | 496  |

|             |                 |     |      |      |
|-------------|-----------------|-----|------|------|
| LmjF07.0480 | <i>L. major</i> | 51  | 2303 | 2353 |
| LmjF07.0480 | <i>L. major</i> | 56  | 2368 | 2423 |
| LmjF07.0480 | <i>L. major</i> | 43  | 2715 | 2757 |
| LmjF07.0480 | <i>L. major</i> | 99  | 2811 | 2909 |
| LmjF07.0480 | <i>L. major</i> | 73  | 3608 | 3680 |
| LmjF07.0480 | <i>L. major</i> | 71  | 3718 | 3788 |
| LmjF07.0480 | <i>L. major</i> | 43  | 4005 | 4047 |
| LmjF07.0480 | <i>L. major</i> | 82  | 4214 | 4295 |
| LmjF07.0480 | <i>L. major</i> | 57  | 4438 | 4494 |
| LmjF07.0480 | <i>L. major</i> | 55  | 4727 | 4781 |
| LmjF07.0490 | <i>L. major</i> | 41  | 1    | 41   |
| LmjF07.0490 | <i>L. major</i> | 50  | 118  | 167  |
| LmjF07.0490 | <i>L. major</i> | 89  | 212  | 300  |
| LmjF07.0490 | <i>L. major</i> | 92  | 307  | 398  |
| LmjF07.0500 | <i>L. major</i> | 64  | 72   | 135  |
| LmjF07.0510 | <i>L. major</i> | 64  | 72   | 135  |
| LmjF07.0520 | <i>L. major</i> | 144 | 29   | 172  |
| LmjF07.0530 | <i>L. major</i> | 69  | 1    | 69   |
| LmjF07.0540 | <i>L. major</i> | 163 | 1    | 163  |
| LmjF07.0540 | <i>L. major</i> | 77  | 233  | 309  |
| LmjF07.0540 | <i>L. major</i> | 238 | 323  | 560  |
| LmjF07.0550 | <i>L. major</i> | 60  | 1    | 60   |
| LmjF07.0550 | <i>L. major</i> | 57  | 98   | 154  |
| LmjF07.0550 | <i>L. major</i> | 61  | 191  | 251  |
| LmjF07.0550 | <i>L. major</i> | 170 | 353  | 522  |
| LmjF07.0550 | <i>L. major</i> | 64  | 549  | 612  |
| LmjF07.0550 | <i>L. major</i> | 110 | 631  | 740  |
| LmjF07.0550 | <i>L. major</i> | 44  | 783  | 826  |
| LmjF07.0550 | <i>L. major</i> | 50  | 871  | 920  |
| LmjF07.0550 | <i>L. major</i> | 76  | 958  | 1033 |
| LmjF07.0550 | <i>L. major</i> | 58  | 1071 | 1128 |
| LmjF07.0550 | <i>L. major</i> | 89  | 1211 | 1299 |
| LmjF07.0550 | <i>L. major</i> | 209 | 1302 | 1510 |
| LmjF07.0560 | <i>L. major</i> | 57  | 169  | 225  |
| LmjF07.0570 | <i>L. major</i> | 134 | 1    | 134  |
| LmjF07.0570 | <i>L. major</i> | 241 | 224  | 464  |
| LmjF07.0580 | <i>L. major</i> | 74  | 1    | 74   |
| LmjF07.0580 | <i>L. major</i> | 301 | 85   | 385  |
| LmjF07.0580 | <i>L. major</i> | 91  | 457  | 547  |
| LmjF07.0580 | <i>L. major</i> | 67  | 593  | 659  |
| LmjF07.0580 | <i>L. major</i> | 112 | 849  | 960  |
| LmjF07.0580 | <i>L. major</i> | 88  | 976  | 1063 |
| LmjF07.0590 | <i>L. major</i> | 366 | 1    | 366  |
| LmjF07.0590 | <i>L. major</i> | 40  | 475  | 514  |
| LmjF07.0590 | <i>L. major</i> | 124 | 754  | 877  |
| LmjF07.0610 | <i>L. major</i> | 95  | 102  | 196  |
| LmjF07.0615 | <i>L. major</i> | 54  | 122  | 175  |



|             |                 |     |      |      |
|-------------|-----------------|-----|------|------|
| LmjF07.0620 | <i>L. major</i> | 102 | 23   | 124  |
| LmjF07.0620 | <i>L. major</i> | 154 | 130  | 283  |
| LmjF07.0620 | <i>L. major</i> | 228 | 303  | 530  |
| LmjF07.0620 | <i>L. major</i> | 40  | 579  | 618  |
| LmjF07.0650 | <i>L. major</i> | 55  | 1    | 55   |
| LmjF07.0660 | <i>L. major</i> | 58  | 25   | 82   |
| LmjF07.0660 | <i>L. major</i> | 43  | 84   | 126  |
| LmjF07.0660 | <i>L. major</i> | 43  | 84   | 126  |
| LmjF07.0670 | <i>L. major</i> | 109 | 1    | 109  |
| LmjF07.0690 | <i>L. major</i> | 89  | 1    | 89   |
| LmjF07.0690 | <i>L. major</i> | 229 | 98   | 326  |
| LmjF07.0690 | <i>L. major</i> | 72  | 329  | 400  |
| LmjF07.0690 | <i>L. major</i> | 206 | 410  | 615  |
| LmjF07.0690 | <i>L. major</i> | 329 | 670  | 998  |
| LmjF07.0690 | <i>L. major</i> | 178 | 1105 | 1282 |
| LmjF07.0690 | <i>L. major</i> | 172 | 1462 | 1633 |
| LmjF07.0700 | <i>L. major</i> | 86  | 1    | 86   |
| LmjF07.0700 | <i>L. major</i> | 201 | 110  | 310  |
| LmjF07.0700 | <i>L. major</i> | 56  | 324  | 379  |
| LmjF07.0700 | <i>L. major</i> | 56  | 703  | 758  |
| LmjF07.0700 | <i>L. major</i> | 133 | 784  | 916  |
| LmjF07.0710 | <i>L. major</i> | 40  | 1    | 40   |
| LmjF07.0715 | <i>L. major</i> | 160 | 30   | 189  |
| LmjF07.0715 | <i>L. major</i> | 107 | 214  | 320  |
| LmjF07.0715 | <i>L. major</i> | 266 | 326  | 591  |
| LmjF07.0720 | <i>L. major</i> | 95  | 861  | 955  |
| LmjF07.0730 | <i>L. major</i> | 131 | 1    | 131  |
| LmjF07.0730 | <i>L. major</i> | 48  | 309  | 356  |
| LmjF07.0740 | <i>L. major</i> | 71  | 1    | 71   |
| LmjF07.0740 | <i>L. major</i> | 65  | 181  | 245  |
| LmjF07.0740 | <i>L. major</i> | 120 | 302  | 421  |
| LmjF07.0740 | <i>L. major</i> | 108 | 819  | 926  |
| LmjF07.0740 | <i>L. major</i> | 82  | 988  | 1069 |
| LmjF07.0740 | <i>L. major</i> | 56  | 1099 | 1154 |
| LmjF07.0740 | <i>L. major</i> | 50  | 1298 | 1347 |
| LmjF07.0740 | <i>L. major</i> | 49  | 1406 | 1454 |
| LmjF07.0740 | <i>L. major</i> | 156 | 1568 | 1723 |
| LmjF07.0740 | <i>L. major</i> | 45  | 1957 | 2001 |
| LmjF07.0740 | <i>L. major</i> | 55  | 2007 | 2061 |
| LmjF07.0740 | <i>L. major</i> | 42  | 2109 | 2150 |
| LmjF07.0740 | <i>L. major</i> | 62  | 2212 | 2273 |
| LmjF07.0740 | <i>L. major</i> | 41  | 2382 | 2422 |
| LmjF07.0740 | <i>L. major</i> | 69  | 2490 | 2558 |
| LmjF07.0740 | <i>L. major</i> | 120 | 2579 | 2698 |
| LmjF07.0740 | <i>L. major</i> | 50  | 2737 | 2786 |
| LmjF07.0740 | <i>L. major</i> | 117 | 2897 | 3013 |
| LmjF07.0740 | <i>L. major</i> | 92  | 3080 | 3171 |

|             |                 |      |      |      |
|-------------|-----------------|------|------|------|
| LmjF07.0740 | <i>L. major</i> | 48   | 3198 | 3245 |
| LmjF07.0740 | <i>L. major</i> | 45   | 3288 | 3332 |
| LmjF07.0740 | <i>L. major</i> | 316  | 3457 | 3772 |
| LmjF07.0743 | <i>L. major</i> | 138  | 1    | 138  |
| LmjF07.0750 | <i>L. major</i> | 129  | 49   | 177  |
| LmjF07.0760 | <i>L. major</i> | 183  | 1    | 183  |
| LmjF07.0760 | <i>L. major</i> | 157  | 264  | 420  |
| LmjF07.0760 | <i>L. major</i> | 137  | 476  | 612  |
| LmjF07.0760 | <i>L. major</i> | 122  | 648  | 769  |
| LmjF07.0760 | <i>L. major</i> | 71   | 878  | 948  |
| LmjF07.0760 | <i>L. major</i> | 59   | 1027 | 1085 |
| LmjF07.0770 | <i>L. major</i> | 143  | 1    | 143  |
| LmjF07.0780 | <i>L. major</i> | 48   | 1    | 48   |
| LmjF07.0780 | <i>L. major</i> | 187  | 97   | 283  |
| LmjF07.0790 | <i>L. major</i> | 239  | 1    | 239  |
| LmjF07.0800 | <i>L. major</i> | 55   | 380  | 434  |
| LmjF07.0800 | <i>L. major</i> | 46   | 551  | 596  |
| LmjF07.0800 | <i>L. major</i> | 46   | 551  | 596  |
| LmjF07.0802 | <i>L. major</i> | 132  | 71   | 202  |
| LmjF07.0802 | <i>L. major</i> | 123  | 230  | 352  |
| LmjF07.0820 | <i>L. major</i> | 59   | 437  | 495  |
| LmjF07.0820 | <i>L. major</i> | 74   | 725  | 798  |
| LmjF07.0820 | <i>L. major</i> | 52   | 1427 | 1478 |
| LmjF07.0820 | <i>L. major</i> | 43   | 1933 | 1975 |
| LmjF07.0830 | <i>L. major</i> | 47   | 425  | 471  |
| LmjF07.0830 | <i>L. major</i> | 43   | 630  | 672  |
| LmjF07.0830 | <i>L. major</i> | 52   | 1412 | 1463 |
| LmjF07.0830 | <i>L. major</i> | 46   | 1869 | 1914 |
| LmjF07.0830 | <i>L. major</i> | 414  | 1971 | 2384 |
| LmjF07.0840 | <i>L. major</i> | 52   | 1410 | 1461 |
| LmjF07.0840 | <i>L. major</i> | 513  | 1831 | 2343 |
| LmjF07.0850 | <i>L. major</i> | 52   | 1    | 52   |
| LmjF07.0860 | <i>L. major</i> | 132  | 1    | 132  |
| LmjF07.0860 | <i>L. major</i> | 1003 | 147  | 1149 |
| LmjF07.0860 | <i>L. major</i> | 116  | 1177 | 1292 |
| LmjF07.0860 | <i>L. major</i> | 102  | 1322 | 1423 |
| LmjF07.0870 | <i>L. major</i> | 76   | 1    | 76   |
| LmjF07.0870 | <i>L. major</i> | 40   | 141  | 180  |
| LmjF07.0870 | <i>L. major</i> | 126  | 247  | 372  |
| LmjF07.0880 | <i>L. major</i> | 78   | 44   | 121  |
| LmjF07.0880 | <i>L. major</i> | 502  | 142  | 643  |
| LmjF07.0880 | <i>L. major</i> | 68   | 653  | 720  |
| LmjF07.0880 | <i>L. major</i> | 47   | 734  | 780  |
| LmjF07.0880 | <i>L. major</i> | 85   | 889  | 973  |
| LmjF07.0880 | <i>L. major</i> | 49   | 977  | 1025 |
| LmjF07.0880 | <i>L. major</i> | 41   | 1176 | 1216 |
| LmjF07.0890 | <i>L. major</i> | 75   | 1    | 75   |

|             |                 |     |      |      |
|-------------|-----------------|-----|------|------|
| LmjF07.0890 | <i>L. major</i> | 176 | 80   | 255  |
| LmjF07.0890 | <i>L. major</i> | 117 | 323  | 439  |
| LmjF07.0890 | <i>L. major</i> | 187 | 443  | 629  |
| LmjF07.0910 | <i>L. major</i> | 351 | 1    | 351  |
| LmjF07.0910 | <i>L. major</i> | 259 | 357  | 615  |
| LmjF07.0910 | <i>L. major</i> | 47  | 788  | 834  |
| LmjF07.0910 | <i>L. major</i> | 57  | 925  | 981  |
| LmjF07.0910 | <i>L. major</i> | 138 | 1242 | 1379 |
| LmjF07.0910 | <i>L. major</i> | 79  | 1390 | 1468 |
| LmjF07.0910 | <i>L. major</i> | 154 | 1691 | 1844 |
| LmjF07.0920 | <i>L. major</i> | 44  | 1    | 44   |
| LmjF07.0920 | <i>L. major</i> | 82  | 167  | 248  |
| LmjF07.0920 | <i>L. major</i> | 85  | 387  | 471  |
| LmjF07.0920 | <i>L. major</i> | 43  | 580  | 622  |
| LmjF07.0920 | <i>L. major</i> | 88  | 670  | 757  |
| LmjF07.0920 | <i>L. major</i> | 144 | 812  | 955  |
| LmjF07.0920 | <i>L. major</i> | 42  | 1110 | 1151 |
| LmjF07.0920 | <i>L. major</i> | 63  | 1188 | 1250 |
| LmjF07.0920 | <i>L. major</i> | 86  | 1315 | 1400 |
| LmjF07.0920 | <i>L. major</i> | 280 | 1455 | 1734 |
| LmjF07.0930 | <i>L. major</i> | 83  | 103  | 185  |
| LmjF07.0940 | <i>L. major</i> | 62  | 1    | 62   |
| LmjF07.0940 | <i>L. major</i> | 77  | 382  | 458  |
| LmjF07.0940 | <i>L. major</i> | 56  | 505  | 560  |
| LmjF07.0940 | <i>L. major</i> | 67  | 611  | 677  |
| LmjF07.0940 | <i>L. major</i> | 82  | 1820 | 1901 |
| LmjF07.0940 | <i>L. major</i> | 40  | 2322 | 2361 |
| LmjF07.0950 | <i>L. major</i> | 209 | 1    | 209  |
| LmjF07.0950 | <i>L. major</i> | 102 | 245  | 346  |
| LmjF07.0950 | <i>L. major</i> | 140 | 419  | 558  |
| LmjF07.0950 | <i>L. major</i> | 250 | 684  | 933  |
| LmjF07.0950 | <i>L. major</i> | 174 | 1138 | 1311 |
| LmjF07.0950 | <i>L. major</i> | 45  | 1326 | 1370 |
| LmjF07.0950 | <i>L. major</i> | 195 | 1493 | 1687 |
| LmjF07.0950 | <i>L. major</i> | 65  | 1730 | 1794 |
| LmjF07.0960 | <i>L. major</i> | 285 | 78   | 362  |
| LmjF07.0960 | <i>L. major</i> | 742 | 393  | 1134 |
| LmjF07.0970 | <i>L. major</i> | 78  | 43   | 120  |
| LmjF07.0970 | <i>L. major</i> | 162 | 161  | 322  |
| LmjF07.0970 | <i>L. major</i> | 133 | 672  | 804  |
| LmjF07.0990 | <i>L. major</i> | 265 | 88   | 352  |
| LmjF07.1000 | <i>L. major</i> | 237 | 92   | 328  |
| LmjF07.1010 | <i>L. major</i> | 72  | 49   | 120  |
| LmjF07.1020 | <i>L. major</i> | 258 | 1    | 258  |
| LmjF07.1020 | <i>L. major</i> | 44  | 484  | 527  |
| LmjF07.1020 | <i>L. major</i> | 133 | 819  | 951  |
| LmjF07.1020 | <i>L. major</i> | 50  | 1023 | 1072 |

|             |                 |     |      |      |
|-------------|-----------------|-----|------|------|
| LmjF07.1040 | <i>L. major</i> | 40  | 1    | 40   |
| LmjF07.1050 | <i>L. major</i> | 124 | 871  | 994  |
| LmjF07.1055 | <i>L. major</i> | 46  | 1    | 46   |
| LmjF07.1070 | <i>L. major</i> | 54  | 1    | 54   |
| LmjF07.1070 | <i>L. major</i> | 127 | 141  | 267  |
| LmjF07.1070 | <i>L. major</i> | 90  | 284  | 373  |
| LmjF07.1080 | <i>L. major</i> | 231 | 307  | 537  |
| LmjF07.1080 | <i>L. major</i> | 56  | 668  | 723  |
| LmjF07.1100 | <i>L. major</i> | 84  | 1    | 84   |
| LmjF07.1100 | <i>L. major</i> | 144 | 163  | 306  |
| LmjF07.1110 | <i>L. major</i> | 104 | 215  | 318  |
| LmjF07.1120 | <i>L. major</i> | 160 | 187  | 346  |
| LmjF07.1150 | <i>L. major</i> | 146 | 41   | 186  |
| LmjF07.1150 | <i>L. major</i> | 81  | 1092 | 1172 |
| LmjF07.1150 | <i>L. major</i> | 54  | 1272 | 1325 |
| LmjF07.1150 | <i>L. major</i> | 43  | 1424 | 1466 |
| LmjF07.1150 | <i>L. major</i> | 50  | 1553 | 1602 |
| LmjF07.1160 | <i>L. major</i> | 83  | 1    | 83   |
| LmjF07.1170 | <i>L. major</i> | 92  | 1    | 92   |
| LmjF07.1170 | <i>L. major</i> | 55  | 133  | 187  |
| LmjF08.0010 | <i>L. major</i> | 51  | 176  | 226  |
| LmjF08.0010 | <i>L. major</i> | 89  | 235  | 323  |
| LmjF08.0010 | <i>L. major</i> | 177 | 330  | 506  |
| LmjF08.0010 | <i>L. major</i> | 165 | 674  | 838  |
| LmjF08.0010 | <i>L. major</i> | 83  | 855  | 937  |
| LmjF08.0010 | <i>L. major</i> | 59  | 967  | 1025 |
| LmjF08.0040 | <i>L. major</i> | 67  | 61   | 127  |
| LmjF08.0070 | <i>L. major</i> | 80  | 70   | 149  |
| LmjF08.0070 | <i>L. major</i> | 79  | 201  | 279  |
| LmjF08.0070 | <i>L. major</i> | 181 | 294  | 474  |
| LmjF08.0080 | <i>L. major</i> | 147 | 418  | 564  |
| LmjF08.0090 | <i>L. major</i> | 41  | 545  | 585  |
| LmjF08.0090 | <i>L. major</i> | 175 | 649  | 823  |
| LmjF08.0090 | <i>L. major</i> | 175 | 649  | 823  |
| LmjF08.0100 | <i>L. major</i> | 47  | 1    | 47   |
| LmjF08.0100 | <i>L. major</i> | 75  | 252  | 326  |
| LmjF08.0100 | <i>L. major</i> | 66  | 386  | 451  |
| LmjF08.0110 | <i>L. major</i> | 109 | 51   | 159  |
| LmjF08.0110 | <i>L. major</i> | 101 | 171  | 271  |
| LmjF08.0110 | <i>L. major</i> | 266 | 378  | 643  |
| LmjF08.0120 | <i>L. major</i> | 44  | 198  | 241  |
| LmjF08.0130 | <i>L. major</i> | 95  | 1    | 95   |
| LmjF08.0130 | <i>L. major</i> | 171 | 146  | 316  |
| LmjF08.0130 | <i>L. major</i> | 418 | 347  | 764  |
| LmjF08.0130 | <i>L. major</i> | 373 | 774  | 1146 |
| LmjF08.0140 | <i>L. major</i> | 58  | 304  | 361  |
| LmjF08.0140 | <i>L. major</i> | 58  | 524  | 581  |

|             |                 |     |      |      |
|-------------|-----------------|-----|------|------|
| LmjF08.0140 | <i>L. major</i> | 85  | 685  | 769  |
| LmjF08.0140 | <i>L. major</i> | 61  | 791  | 851  |
| LmjF08.0140 | <i>L. major</i> | 48  | 859  | 906  |
| LmjF08.0140 | <i>L. major</i> | 63  | 959  | 1021 |
| LmjF08.0150 | <i>L. major</i> | 61  | 76   | 136  |
| LmjF08.0150 | <i>L. major</i> | 55  | 386  | 440  |
| LmjF08.0150 | <i>L. major</i> | 55  | 386  | 440  |
| LmjF08.0160 | <i>L. major</i> | 89  | 14   | 102  |
| LmjF08.0170 | <i>L. major</i> | 51  | 1    | 51   |
| LmjF08.0170 | <i>L. major</i> | 109 | 236  | 344  |
| LmjF08.0170 | <i>L. major</i> | 109 | 236  | 344  |
| LmjF08.0180 | <i>L. major</i> | 60  | 235  | 294  |
| LmjF08.0190 | <i>L. major</i> | 48  | 195  | 242  |
| LmjF08.0190 | <i>L. major</i> | 53  | 581  | 633  |
| LmjF08.0200 | <i>L. major</i> | 56  | 540  | 595  |
| LmjF08.0210 | <i>L. major</i> | 400 | 1    | 400  |
| LmjF08.0210 | <i>L. major</i> | 40  | 422  | 461  |
| LmjF08.0220 | <i>L. major</i> | 98  | 236  | 333  |
| LmjF08.0220 | <i>L. major</i> | 49  | 339  | 387  |
| LmjF08.0220 | <i>L. major</i> | 74  | 473  | 546  |
| LmjF08.0220 | <i>L. major</i> | 97  | 730  | 826  |
| LmjF08.0240 | <i>L. major</i> | 50  | 1    | 50   |
| LmjF08.0240 | <i>L. major</i> | 51  | 212  | 262  |
| LmjF08.0240 | <i>L. major</i> | 51  | 212  | 262  |
| LmjF08.0250 | <i>L. major</i> | 40  | 1    | 40   |
| LmjF08.0250 | <i>L. major</i> | 50  | 100  | 149  |
| LmjF08.0250 | <i>L. major</i> | 50  | 100  | 149  |
| LmjF08.0260 | <i>L. major</i> | 384 | 1    | 384  |
| LmjF08.0270 | <i>L. major</i> | 134 | 1    | 134  |
| LmjF08.0270 | <i>L. major</i> | 97  | 229  | 325  |
| LmjF08.0270 | <i>L. major</i> | 196 | 370  | 565  |
| LmjF08.0270 | <i>L. major</i> | 138 | 584  | 721  |
| LmjF08.0270 | <i>L. major</i> | 45  | 752  | 796  |
| LmjF08.0280 | <i>L. major</i> | 43  | 283  | 325  |
| LmjF08.0310 | <i>L. major</i> | 66  | 1    | 66   |
| LmjF08.0310 | <i>L. major</i> | 52  | 260  | 311  |
| LmjF08.0310 | <i>L. major</i> | 52  | 260  | 311  |
| LmjF08.0340 | <i>L. major</i> | 153 | 1    | 153  |
| LmjF08.0340 | <i>L. major</i> | 50  | 548  | 597  |
| LmjF08.0340 | <i>L. major</i> | 129 | 621  | 749  |
| LmjF08.0340 | <i>L. major</i> | 56  | 826  | 881  |
| LmjF08.0340 | <i>L. major</i> | 48  | 1134 | 1181 |
| LmjF08.0340 | <i>L. major</i> | 84  | 1209 | 1292 |
| LmjF08.0340 | <i>L. major</i> | 42  | 1311 | 1352 |
| LmjF08.0340 | <i>L. major</i> | 91  | 1404 | 1494 |
| LmjF08.0340 | <i>L. major</i> | 48  | 1745 | 1792 |
| LmjF08.0340 | <i>L. major</i> | 138 | 1813 | 1950 |

|             |                 |     |      |      |
|-------------|-----------------|-----|------|------|
| LmjF08.0340 | <i>L. major</i> | 75  | 2303 | 2377 |
| LmjF08.0340 | <i>L. major</i> | 53  | 2448 | 2500 |
| LmjF08.0340 | <i>L. major</i> | 139 | 2644 | 2782 |
| LmjF08.0340 | <i>L. major</i> | 119 | 2995 | 3113 |
| LmjF08.0340 | <i>L. major</i> | 80  | 3148 | 3227 |
| LmjF08.0340 | <i>L. major</i> | 133 | 3253 | 3385 |
| LmjF08.0340 | <i>L. major</i> | 42  | 3434 | 3475 |
| LmjF08.0340 | <i>L. major</i> | 129 | 3600 | 3728 |
| LmjF08.0340 | <i>L. major</i> | 126 | 4150 | 4275 |
| LmjF08.0340 | <i>L. major</i> | 54  | 4367 | 4420 |
| LmjF08.0340 | <i>L. major</i> | 47  | 4454 | 4500 |
| LmjF08.0340 | <i>L. major</i> | 42  | 4615 | 4656 |
| LmjF08.0340 | <i>L. major</i> | 75  | 4677 | 4751 |
| LmjF08.0350 | <i>L. major</i> | 262 | 79   | 340  |
| LmjF08.0350 | <i>L. major</i> | 445 | 383  | 827  |
| LmjF08.0350 | <i>L. major</i> | 125 | 948  | 1072 |
| LmjF08.0350 | <i>L. major</i> | 50  | 1219 | 1268 |
| LmjF08.0350 | <i>L. major</i> | 45  | 1282 | 1326 |
| LmjF08.0360 | <i>L. major</i> | 143 | 195  | 337  |
| LmjF08.0360 | <i>L. major</i> | 233 | 399  | 631  |
| LmjF08.0370 | <i>L. major</i> | 108 | 1    | 108  |
| LmjF08.0380 | <i>L. major</i> | 144 | 1    | 144  |
| LmjF08.0380 | <i>L. major</i> | 194 | 195  | 388  |
| LmjF08.0380 | <i>L. major</i> | 175 | 413  | 587  |
| LmjF08.0380 | <i>L. major</i> | 87  | 688  | 774  |
| LmjF08.0380 | <i>L. major</i> | 73  | 884  | 956  |
| LmjF08.0380 | <i>L. major</i> | 248 | 1149 | 1396 |
| LmjF08.0380 | <i>L. major</i> | 324 | 1490 | 1813 |
| LmjF08.0390 | <i>L. major</i> | 70  | 18   | 87   |
| LmjF08.0390 | <i>L. major</i> | 370 | 110  | 479  |
| LmjF08.0390 | <i>L. major</i> | 106 | 502  | 607  |
| LmjF08.0390 | <i>L. major</i> | 59  | 638  | 696  |
| LmjF08.0390 | <i>L. major</i> | 53  | 736  | 788  |
| LmjF08.0390 | <i>L. major</i> | 130 | 824  | 953  |
| LmjF08.0390 | <i>L. major</i> | 48  | 1021 | 1068 |
| LmjF08.0390 | <i>L. major</i> | 77  | 1082 | 1158 |
| LmjF08.0390 | <i>L. major</i> | 42  | 1199 | 1240 |
| LmjF08.0390 | <i>L. major</i> | 162 | 1264 | 1425 |
| LmjF08.0390 | <i>L. major</i> | 95  | 1431 | 1525 |
| LmjF08.0390 | <i>L. major</i> | 258 | 1546 | 1803 |
| LmjF08.0400 | <i>L. major</i> | 83  | 1    | 83   |
| LmjF08.0400 | <i>L. major</i> | 250 | 124  | 373  |
| LmjF08.0400 | <i>L. major</i> | 97  | 513  | 609  |
| LmjF08.0400 | <i>L. major</i> | 51  | 681  | 731  |
| LmjF08.0400 | <i>L. major</i> | 53  | 744  | 796  |
| LmjF08.0400 | <i>L. major</i> | 159 | 957  | 1115 |
| LmjF08.0410 | <i>L. major</i> | 45  | 21   | 65   |

|             |                 |     |      |      |
|-------------|-----------------|-----|------|------|
| LmjF08.0410 | <i>L. major</i> | 78  | 160  | 237  |
| LmjF08.0410 | <i>L. major</i> | 56  | 354  | 409  |
| LmjF08.0410 | <i>L. major</i> | 41  | 978  | 1018 |
| LmjF08.0420 | <i>L. major</i> | 60  | 1    | 60   |
| LmjF08.0420 | <i>L. major</i> | 117 | 312  | 428  |
| LmjF08.0420 | <i>L. major</i> | 257 | 450  | 706  |
| LmjF08.0420 | <i>L. major</i> | 44  | 731  | 774  |
| LmjF08.0420 | <i>L. major</i> | 69  | 785  | 853  |
| LmjF08.0420 | <i>L. major</i> | 55  | 966  | 1020 |
| LmjF08.0420 | <i>L. major</i> | 93  | 1370 | 1462 |
| LmjF08.0420 | <i>L. major</i> | 108 | 1464 | 1571 |
| LmjF08.0420 | <i>L. major</i> | 106 | 1759 | 1864 |
| LmjF08.0430 | <i>L. major</i> | 192 | 84   | 275  |
| LmjF08.0430 | <i>L. major</i> | 170 | 329  | 498  |
| LmjF08.0430 | <i>L. major</i> | 91  | 509  | 599  |
| LmjF08.0430 | <i>L. major</i> | 144 | 638  | 781  |
| LmjF08.0440 | <i>L. major</i> | 43  | 102  | 144  |
| LmjF08.0440 | <i>L. major</i> | 51  | 193  | 243  |
| LmjF08.0440 | <i>L. major</i> | 183 | 484  | 666  |
| LmjF08.0440 | <i>L. major</i> | 54  | 785  | 838  |
| LmjF08.0440 | <i>L. major</i> | 73  | 979  | 1051 |
| LmjF08.0440 | <i>L. major</i> | 67  | 1460 | 1526 |
| LmjF08.0440 | <i>L. major</i> | 75  | 1776 | 1850 |
| LmjF08.0440 | <i>L. major</i> | 46  | 1967 | 2012 |
| LmjF08.0440 | <i>L. major</i> | 65  | 2230 | 2294 |
| LmjF08.0440 | <i>L. major</i> | 47  | 2388 | 2434 |
| LmjF08.0480 | <i>L. major</i> | 56  | 61   | 116  |
| LmjF08.0480 | <i>L. major</i> | 114 | 169  | 282  |
| LmjF08.0490 | <i>L. major</i> | 220 | 1    | 220  |
| LmjF08.0500 | <i>L. major</i> | 92  | 1    | 92   |
| LmjF08.0500 | <i>L. major</i> | 81  | 105  | 185  |
| LmjF08.0500 | <i>L. major</i> | 69  | 202  | 270  |
| LmjF08.0500 | <i>L. major</i> | 50  | 282  | 331  |
| LmjF08.0510 | <i>L. major</i> | 46  | 86   | 131  |
| LmjF08.0510 | <i>L. major</i> | 81  | 560  | 640  |
| LmjF08.0510 | <i>L. major</i> | 54  | 654  | 707  |
| LmjF08.0520 | <i>L. major</i> | 99  | 352  | 450  |
| LmjF08.0520 | <i>L. major</i> | 100 | 532  | 631  |
| LmjF08.0520 | <i>L. major</i> | 60  | 660  | 719  |
| LmjF08.0520 | <i>L. major</i> | 58  | 917  | 974  |
| LmjF08.0520 | <i>L. major</i> | 98  | 1013 | 1110 |
| LmjF08.0520 | <i>L. major</i> | 109 | 1148 | 1256 |
| LmjF08.0520 | <i>L. major</i> | 68  | 1523 | 1590 |
| LmjF08.0520 | <i>L. major</i> | 64  | 1599 | 1662 |
| LmjF08.0520 | <i>L. major</i> | 144 | 1772 | 1915 |
| LmjF08.0520 | <i>L. major</i> | 153 | 1919 | 2071 |
| LmjF08.0520 | <i>L. major</i> | 51  | 2102 | 2152 |

|             |                 |      |      |      |
|-------------|-----------------|------|------|------|
| LmjF08.0520 | <i>L. major</i> | 56   | 2272 | 2327 |
| LmjF08.0530 | <i>L. major</i> | 413  | 84   | 496  |
| LmjF08.0530 | <i>L. major</i> | 115  | 551  | 665  |
| LmjF08.0530 | <i>L. major</i> | 308  | 685  | 992  |
| LmjF08.0530 | <i>L. major</i> | 192  | 999  | 1190 |
| LmjF08.0530 | <i>L. major</i> | 169  | 1199 | 1367 |
| LmjF08.0540 | <i>L. major</i> | 68   | 47   | 114  |
| LmjF08.0540 | <i>L. major</i> | 48   | 142  | 189  |
| LmjF08.0540 | <i>L. major</i> | 85   | 268  | 352  |
| LmjF08.0550 | <i>L. major</i> | 210  | 1    | 210  |
| LmjF08.0560 | <i>L. major</i> | 42   | 1    | 42   |
| LmjF08.0560 | <i>L. major</i> | 41   | 104  | 144  |
| LmjF08.0560 | <i>L. major</i> | 41   | 104  | 144  |
| LmjF08.0570 | <i>L. major</i> | 64   | 116  | 179  |
| LmjF08.0580 | <i>L. major</i> | 57   | 91   | 147  |
| LmjF08.0590 | <i>L. major</i> | 132  | 68   | 199  |
| LmjF08.0590 | <i>L. major</i> | 150  | 209  | 358  |
| LmjF08.0590 | <i>L. major</i> | 67   | 407  | 473  |
| LmjF08.0600 | <i>L. major</i> | 52   | 92   | 143  |
| LmjF08.0620 | <i>L. major</i> | 119  | 66   | 184  |
| LmjF08.0620 | <i>L. major</i> | 47   | 200  | 246  |
| LmjF08.0620 | <i>L. major</i> | 134  | 299  | 432  |
| LmjF08.0620 | <i>L. major</i> | 245  | 477  | 721  |
| LmjF08.0620 | <i>L. major</i> | 62   | 903  | 964  |
| LmjF08.0620 | <i>L. major</i> | 100  | 1045 | 1144 |
| LmjF08.0620 | <i>L. major</i> | 56   | 1173 | 1228 |
| LmjF08.0620 | <i>L. major</i> | 1514 | 1309 | 2822 |
| LmjF08.0630 | <i>L. major</i> | 119  | 149  | 267  |
| LmjF08.0630 | <i>L. major</i> | 151  | 358  | 508  |
| LmjF08.0630 | <i>L. major</i> | 420  | 662  | 1081 |
| LmjF08.0630 | <i>L. major</i> | 56   | 1295 | 1350 |
| LmjF08.0630 | <i>L. major</i> | 338  | 1520 | 1857 |
| LmjF08.0630 | <i>L. major</i> | 202  | 1942 | 2143 |
| LmjF08.0650 | <i>L. major</i> | 193  | 73   | 265  |
| LmjF08.0660 | <i>L. major</i> | 50   | 505  | 554  |
| LmjF08.0660 | <i>L. major</i> | 85   | 831  | 915  |
| LmjF08.0660 | <i>L. major</i> | 85   | 831  | 915  |
| LmjF08.0790 | <i>L. major</i> | 48   | 1    | 48   |
| LmjF08.0790 | <i>L. major</i> | 41   | 226  | 266  |
| LmjF08.0790 | <i>L. major</i> | 41   | 226  | 266  |
| LmjF08.0795 | <i>L. major</i> | 93   | 302  | 394  |
| LmjF08.0860 | <i>L. major</i> | 290  | 1    | 290  |
| LmjF08.0870 | <i>L. major</i> | 75   | 73   | 147  |
| LmjF08.0870 | <i>L. major</i> | 43   | 185  | 227  |
| LmjF08.0870 | <i>L. major</i> | 92   | 308  | 399  |
| LmjF08.0880 | <i>L. major</i> | 58   | 83   | 140  |
| LmjF08.0880 | <i>L. major</i> | 43   | 291  | 333  |



|             |                 |     |      |      |
|-------------|-----------------|-----|------|------|
| LmjF08.0880 | <i>L. major</i> | 53  | 400  | 452  |
| LmjF08.0890 | <i>L. major</i> | 63  | 34   | 96   |
| LmjF08.0890 | <i>L. major</i> | 44  | 333  | 376  |
| LmjF08.0890 | <i>L. major</i> | 44  | 333  | 376  |
| LmjF08.0900 | <i>L. major</i> | 136 | 1    | 136  |
| LmjF08.0900 | <i>L. major</i> | 44  | 189  | 232  |
| LmjF08.0900 | <i>L. major</i> | 75  | 573  | 647  |
| LmjF08.0910 | <i>L. major</i> | 125 | 29   | 153  |
| LmjF08.0910 | <i>L. major</i> | 44  | 190  | 233  |
| LmjF08.0910 | <i>L. major</i> | 79  | 261  | 339  |
| LmjF08.0910 | <i>L. major</i> | 104 | 403  | 506  |
| LmjF08.0910 | <i>L. major</i> | 52  | 559  | 610  |
| LmjF08.0910 | <i>L. major</i> | 61  | 619  | 679  |
| LmjF08.0910 | <i>L. major</i> | 56  | 689  | 744  |
| LmjF08.0910 | <i>L. major</i> | 100 | 808  | 907  |
| LmjF08.0910 | <i>L. major</i> | 56  | 956  | 1011 |
| LmjF08.0910 | <i>L. major</i> | 179 | 1029 | 1207 |
| LmjF08.0910 | <i>L. major</i> | 176 | 1269 | 1444 |
| LmjF08.0910 | <i>L. major</i> | 92  | 1538 | 1629 |
| LmjF08.0910 | <i>L. major</i> | 145 | 1711 | 1855 |
| LmjF08.0910 | <i>L. major</i> | 95  | 1925 | 2019 |
| LmjF08.0910 | <i>L. major</i> | 72  | 2052 | 2123 |
| LmjF08.0920 | <i>L. major</i> | 47  | 158  | 204  |
| LmjF08.0930 | <i>L. major</i> | 536 | 321  | 856  |
| LmjF08.0930 | <i>L. major</i> | 88  | 958  | 1045 |
| LmjF08.0940 | <i>L. major</i> | 56  | 121  | 176  |
| LmjF08.0940 | <i>L. major</i> | 41  | 199  | 239  |
| LmjF08.0950 | <i>L. major</i> | 149 | 1    | 149  |
| LmjF08.0960 | <i>L. major</i> | 153 | 41   | 193  |
| LmjF08.0960 | <i>L. major</i> | 47  | 196  | 242  |
| LmjF08.0960 | <i>L. major</i> | 44  | 317  | 360  |
| LmjF08.0960 | <i>L. major</i> | 54  | 380  | 433  |
| LmjF08.0960 | <i>L. major</i> | 54  | 470  | 523  |
| LmjF08.0970 | <i>L. major</i> | 147 | 22   | 168  |
| LmjF08.0970 | <i>L. major</i> | 207 | 223  | 429  |
| LmjF08.0970 | <i>L. major</i> | 61  | 550  | 610  |
| LmjF08.0980 | <i>L. major</i> | 93  | 1    | 93   |
| LmjF08.0980 | <i>L. major</i> | 925 | 117  | 1041 |
| LmjF08.0990 | <i>L. major</i> | 49  | 86   | 134  |
| LmjF08.0990 | <i>L. major</i> | 117 | 210  | 326  |
| LmjF08.0990 | <i>L. major</i> | 117 | 210  | 326  |
| LmjF08.1000 | <i>L. major</i> | 126 | 293  | 418  |
| LmjF08.1000 | <i>L. major</i> | 60  | 505  | 564  |
| LmjF08.1000 | <i>L. major</i> | 49  | 994  | 1042 |
| LmjF08.1000 | <i>L. major</i> | 68  | 1422 | 1489 |
| LmjF08.1000 | <i>L. major</i> | 42  | 1505 | 1546 |
| LmjF08.1000 | <i>L. major</i> | 49  | 1809 | 1857 |

|             |                 |     |      |      |
|-------------|-----------------|-----|------|------|
| LmjF08.1000 | <i>L. major</i> | 79  | 1859 | 1937 |
| LmjF08.1000 | <i>L. major</i> | 80  | 1978 | 2057 |
| LmjF08.1000 | <i>L. major</i> | 62  | 2067 | 2128 |
| LmjF08.1000 | <i>L. major</i> | 58  | 2138 | 2195 |
| LmjF08.1090 | <i>L. major</i> | 66  | 441  | 506  |
| LmjF08.1100 | <i>L. major</i> | 45  | 54   | 98   |
| LmjF08.1100 | <i>L. major</i> | 68  | 298  | 365  |
| LmjF08.1100 | <i>L. major</i> | 68  | 298  | 365  |
| LmjF08.1110 | <i>L. major</i> | 60  | 184  | 243  |
| LmjF08.1110 | <i>L. major</i> | 43  | 334  | 376  |
| LmjF08.1110 | <i>L. major</i> | 65  | 469  | 533  |
| LmjF08.1120 | <i>L. major</i> | 65  | 43   | 107  |
| LmjF08.1120 | <i>L. major</i> | 50  | 428  | 477  |
| LmjF08.1120 | <i>L. major</i> | 43  | 702  | 744  |
| LmjF08.1140 | <i>L. major</i> | 338 | 380  | 717  |
| LmjF08.1140 | <i>L. major</i> | 43  | 749  | 791  |
| LmjF08.1150 | <i>L. major</i> | 54  | 221  | 274  |
| LmjF08.1150 | <i>L. major</i> | 74  | 469  | 542  |
| LmjF08.1150 | <i>L. major</i> | 147 | 632  | 778  |
| LmjF08.1160 | <i>L. major</i> | 79  | 127  | 205  |
| LmjF08.1180 | <i>L. major</i> | 58  | 95   | 152  |
| LmjF08.1180 | <i>L. major</i> | 106 | 265  | 370  |
| LmjF08.1180 | <i>L. major</i> | 106 | 265  | 370  |
| LmjF08.1190 | <i>L. major</i> | 97  | 1060 | 1156 |
| LmjF08.1210 | <i>L. major</i> | 59  | 151  | 209  |
| LmjF08.1215 | <i>L. major</i> | 150 | 117  | 266  |
| LmjF08.1215 | <i>L. major</i> | 151 | 356  | 506  |
| LmjF08.1218 | <i>L. major</i> | 160 | 1    | 160  |
| LmjF08.1218 | <i>L. major</i> | 99  | 163  | 261  |
| LmjF08.1218 | <i>L. major</i> | 119 | 361  | 479  |
| LmjF08.1228 | <i>L. major</i> | 89  | 193  | 281  |
| LmjF08.1228 | <i>L. major</i> | 43  | 513  | 555  |
| LmjF08.1228 | <i>L. major</i> | 43  | 513  | 555  |
| LmjF08.1230 | <i>L. major</i> | 40  | 404  | 443  |
| LmjF08.1240 | <i>L. major</i> | 150 | 117  | 266  |
| LmjF08.1240 | <i>L. major</i> | 151 | 356  | 506  |
| LmjF08.1250 | <i>L. major</i> | 160 | 1    | 160  |
| LmjF08.1250 | <i>L. major</i> | 99  | 163  | 261  |
| LmjF08.1250 | <i>L. major</i> | 119 | 361  | 479  |
| LmjF08.1280 | <i>L. major</i> | 89  | 193  | 281  |
| LmjF08.1280 | <i>L. major</i> | 43  | 513  | 555  |
| LmjF08.1280 | <i>L. major</i> | 43  | 513  | 555  |
| LmjF09.0003 | <i>L. major</i> | 104 | 1    | 104  |
| LmjF09.0020 | <i>L. major</i> | 42  | 251  | 292  |
| LmjF09.0020 | <i>L. major</i> | 86  | 478  | 563  |
| LmjF09.0020 | <i>L. major</i> | 86  | 478  | 563  |
| LmjF09.0030 | <i>L. major</i> | 57  | 196  | 252  |

|             |                 |     |     |      |
|-------------|-----------------|-----|-----|------|
| LmjF09.0060 | <i>L. major</i> | 46  | 86  | 131  |
| LmjF09.0070 | <i>L. major</i> | 88  | 209 | 296  |
| LmjF09.0070 | <i>L. major</i> | 44  | 527 | 570  |
| LmjF09.0070 | <i>L. major</i> | 44  | 527 | 570  |
| LmjF09.0080 | <i>L. major</i> | 82  | 107 | 188  |
| LmjF09.0090 | <i>L. major</i> | 63  | 37  | 99   |
| LmjF09.0090 | <i>L. major</i> | 90  | 177 | 266  |
| LmjF09.0090 | <i>L. major</i> | 90  | 177 | 266  |
| LmjF09.0100 | <i>L. major</i> | 87  | 92  | 178  |
| LmjF09.0100 | <i>L. major</i> | 323 | 260 | 582  |
| LmjF09.0105 | <i>L. major</i> | 64  | 1   | 64   |
| LmjF09.0110 | <i>L. major</i> | 235 | 1   | 235  |
| LmjF09.0110 | <i>L. major</i> | 201 | 270 | 470  |
| LmjF09.0110 | <i>L. major</i> | 188 | 525 | 712  |
| LmjF09.0120 | <i>L. major</i> | 59  | 157 | 215  |
| LmjF09.0120 | <i>L. major</i> | 151 | 425 | 575  |
| LmjF09.0120 | <i>L. major</i> | 101 | 620 | 720  |
| LmjF09.0120 | <i>L. major</i> | 144 | 737 | 880  |
| LmjF09.0120 | <i>L. major</i> | 138 | 928 | 1065 |
| LmjF09.0140 | <i>L. major</i> | 59  | 246 | 304  |
| LmjF09.0190 | <i>L. major</i> | 43  | 78  | 120  |
| LmjF09.0200 | <i>L. major</i> | 41  | 66  | 106  |
| LmjF09.0210 | <i>L. major</i> | 78  | 52  | 129  |
| LmjF09.0210 | <i>L. major</i> | 91  | 187 | 277  |
| LmjF09.0210 | <i>L. major</i> | 91  | 187 | 277  |
| LmjF09.0220 | <i>L. major</i> | 44  | 570 | 613  |
| LmjF09.0230 | <i>L. major</i> | 59  | 169 | 227  |
| LmjF09.0240 | <i>L. major</i> | 92  | 75  | 166  |
| LmjF09.0240 | <i>L. major</i> | 122 | 279 | 400  |
| LmjF09.0240 | <i>L. major</i> | 70  | 752 | 821  |
| LmjF09.0250 | <i>L. major</i> | 75  | 606 | 680  |
| LmjF09.0260 | <i>L. major</i> | 110 | 1   | 110  |
| LmjF09.0260 | <i>L. major</i> | 89  | 181 | 269  |
| LmjF09.0270 | <i>L. major</i> | 71  | 274 | 344  |
| LmjF09.0270 | <i>L. major</i> | 60  | 562 | 621  |
| LmjF09.0270 | <i>L. major</i> | 60  | 562 | 621  |
| LmjF09.0280 | <i>L. major</i> | 71  | 132 | 202  |
| LmjF09.0280 | <i>L. major</i> | 185 | 254 | 438  |
| LmjF09.0280 | <i>L. major</i> | 46  | 471 | 516  |
| LmjF09.0280 | <i>L. major</i> | 116 | 602 | 717  |
| LmjF09.0290 | <i>L. major</i> | 87  | 247 | 333  |
| LmjF09.0290 | <i>L. major</i> | 96  | 403 | 498  |
| LmjF09.0290 | <i>L. major</i> | 67  | 508 | 574  |
| LmjF09.0290 | <i>L. major</i> | 644 | 621 | 1264 |
| LmjF09.0300 | <i>L. major</i> | 60  | 53  | 112  |
| LmjF09.0300 | <i>L. major</i> | 79  | 127 | 205  |
| LmjF09.0300 | <i>L. major</i> | 79  | 127 | 205  |

|             |                 |     |      |      |
|-------------|-----------------|-----|------|------|
| LmjF09.0310 | <i>L. major</i> | 452 | 1    | 452  |
| LmjF09.0310 | <i>L. major</i> | 44  | 697  | 740  |
| LmjF09.0320 | <i>L. major</i> | 85  | 1    | 85   |
| LmjF09.0320 | <i>L. major</i> | 135 | 641  | 775  |
| LmjF09.0330 | <i>L. major</i> | 162 | 546  | 707  |
| LmjF09.0340 | <i>L. major</i> | 218 | 588  | 805  |
| LmjF09.0340 | <i>L. major</i> | 65  | 839  | 903  |
| LmjF09.0340 | <i>L. major</i> | 60  | 1005 | 1064 |
| LmjF09.0345 | <i>L. major</i> | 63  | 105  | 167  |
| LmjF09.0345 | <i>L. major</i> | 60  | 191  | 250  |
| LmjF09.0345 | <i>L. major</i> | 60  | 191  | 250  |
| LmjF09.0350 | <i>L. major</i> | 237 | 1    | 237  |
| LmjF09.0350 | <i>L. major</i> | 344 | 245  | 588  |
| LmjF09.0350 | <i>L. major</i> | 179 | 633  | 811  |
| LmjF09.0360 | <i>L. major</i> | 131 | 1    | 131  |
| LmjF09.0360 | <i>L. major</i> | 61  | 164  | 224  |
| LmjF09.0365 | <i>L. major</i> | 82  | 1    | 82   |
| LmjF09.0370 | <i>L. major</i> | 88  | 1    | 88   |
| LmjF09.0380 | <i>L. major</i> | 62  | 1    | 62   |
| LmjF09.0380 | <i>L. major</i> | 164 | 157  | 320  |
| LmjF09.0390 | <i>L. major</i> | 303 | 65   | 367  |
| LmjF09.0390 | <i>L. major</i> | 220 | 499  | 718  |
| LmjF09.0390 | <i>L. major</i> | 52  | 751  | 802  |
| LmjF09.0390 | <i>L. major</i> | 113 | 1033 | 1145 |
| LmjF09.0390 | <i>L. major</i> | 160 | 1164 | 1323 |
| LmjF09.0390 | <i>L. major</i> | 57  | 1456 | 1512 |
| LmjF09.0390 | <i>L. major</i> | 193 | 1566 | 1758 |
| LmjF09.0390 | <i>L. major</i> | 83  | 1830 | 1912 |
| LmjF09.0400 | <i>L. major</i> | 61  | 1    | 61   |
| LmjF09.0410 | <i>L. major</i> | 49  | 1    | 49   |
| LmjF09.0420 | <i>L. major</i> | 54  | 101  | 154  |
| LmjF09.0420 | <i>L. major</i> | 79  | 350  | 428  |
| LmjF09.0420 | <i>L. major</i> | 146 | 494  | 639  |
| LmjF09.0420 | <i>L. major</i> | 91  | 648  | 738  |
| LmjF09.0420 | <i>L. major</i> | 174 | 761  | 934  |
| LmjF09.0420 | <i>L. major</i> | 57  | 941  | 997  |
| LmjF09.0430 | <i>L. major</i> | 233 | 145  | 377  |
| LmjF09.0440 | <i>L. major</i> | 81  | 35   | 115  |
| LmjF09.0440 | <i>L. major</i> | 63  | 183  | 245  |
| LmjF09.0450 | <i>L. major</i> | 102 | 110  | 211  |
| LmjF09.0450 | <i>L. major</i> | 264 | 281  | 544  |
| LmjF09.0450 | <i>L. major</i> | 56  | 571  | 626  |
| LmjF09.0450 | <i>L. major</i> | 72  | 643  | 714  |
| LmjF09.0450 | <i>L. major</i> | 64  | 750  | 813  |
| LmjF09.0450 | <i>L. major</i> | 104 | 831  | 934  |
| LmjF09.0460 | <i>L. major</i> | 50  | 1    | 50   |
| LmjF09.0460 | <i>L. major</i> | 83  | 95   | 177  |

|             |                 |     |      |      |
|-------------|-----------------|-----|------|------|
| LmjF09.0460 | <i>L. major</i> | 123 | 313  | 435  |
| LmjF09.0460 | <i>L. major</i> | 49  | 594  | 642  |
| LmjF09.0460 | <i>L. major</i> | 120 | 667  | 786  |
| LmjF09.0460 | <i>L. major</i> | 66  | 819  | 884  |
| LmjF09.0460 | <i>L. major</i> | 142 | 1052 | 1193 |
| LmjF09.0460 | <i>L. major</i> | 87  | 1520 | 1606 |
| LmjF09.0460 | <i>L. major</i> | 59  | 1688 | 1746 |
| LmjF09.0460 | <i>L. major</i> | 59  | 1808 | 1866 |
| LmjF09.0460 | <i>L. major</i> | 45  | 1941 | 1985 |
| LmjF09.0460 | <i>L. major</i> | 40  | 2226 | 2265 |
| LmjF09.0460 | <i>L. major</i> | 79  | 2447 | 2525 |
| LmjF09.0460 | <i>L. major</i> | 78  | 2721 | 2798 |
| LmjF09.0460 | <i>L. major</i> | 72  | 2838 | 2909 |
| LmjF09.0470 | <i>L. major</i> | 113 | 1    | 113  |
| LmjF09.0470 | <i>L. major</i> | 112 | 142  | 253  |
| LmjF09.0480 | <i>L. major</i> | 91  | 1    | 91   |
| LmjF09.0480 | <i>L. major</i> | 264 | 291  | 554  |
| LmjF09.0490 | <i>L. major</i> | 42  | 322  | 363  |
| LmjF09.0500 | <i>L. major</i> | 63  | 1    | 63   |
| LmjF09.0500 | <i>L. major</i> | 46  | 142  | 187  |
| LmjF09.0500 | <i>L. major</i> | 47  | 211  | 257  |
| LmjF09.0500 | <i>L. major</i> | 53  | 312  | 364  |
| LmjF09.0500 | <i>L. major</i> | 86  | 391  | 476  |
| LmjF09.0500 | <i>L. major</i> | 87  | 491  | 577  |
| LmjF09.0500 | <i>L. major</i> | 63  | 854  | 916  |
| LmjF09.0500 | <i>L. major</i> | 106 | 933  | 1038 |
| LmjF09.0500 | <i>L. major</i> | 65  | 1178 | 1242 |
| LmjF09.0500 | <i>L. major</i> | 259 | 1245 | 1503 |
| LmjF09.0510 | <i>L. major</i> | 50  | 166  | 215  |
| LmjF09.0510 | <i>L. major</i> | 97  | 227  | 323  |
| LmjF09.0520 | <i>L. major</i> | 65  | 164  | 228  |
| LmjF09.0520 | <i>L. major</i> | 101 | 602  | 702  |
| LmjF09.0520 | <i>L. major</i> | 61  | 711  | 771  |
| LmjF09.0530 | <i>L. major</i> | 113 | 1    | 113  |
| LmjF09.0530 | <i>L. major</i> | 49  | 129  | 177  |
| LmjF09.0530 | <i>L. major</i> | 198 | 800  | 997  |
| LmjF09.0540 | <i>L. major</i> | 66  | 1    | 66   |
| LmjF09.0540 | <i>L. major</i> | 688 | 79   | 766  |
| LmjF09.0540 | <i>L. major</i> | 185 | 817  | 1001 |
| LmjF09.0550 | <i>L. major</i> | 91  | 40   | 130  |
| LmjF09.0550 | <i>L. major</i> | 78  | 182  | 259  |
| LmjF09.0550 | <i>L. major</i> | 74  | 275  | 348  |
| LmjF09.0550 | <i>L. major</i> | 45  | 439  | 483  |
| LmjF09.0560 | <i>L. major</i> | 41  | 138  | 178  |
| LmjF09.0570 | <i>L. major</i> | 72  | 88   | 159  |
| LmjF09.0570 | <i>L. major</i> | 143 | 210  | 352  |
| LmjF09.0590 | <i>L. major</i> | 220 | 596  | 815  |

|             |                 |     |      |      |
|-------------|-----------------|-----|------|------|
| LmjF09.0610 | <i>L. major</i> | 95  | 23   | 117  |
| LmjF09.0610 | <i>L. major</i> | 40  | 533  | 572  |
| LmjF09.0610 | <i>L. major</i> | 41  | 688  | 728  |
| LmjF09.0620 | <i>L. major</i> | 86  | 1    | 86   |
| LmjF09.0620 | <i>L. major</i> | 113 | 125  | 237  |
| LmjF09.0620 | <i>L. major</i> | 65  | 381  | 445  |
| LmjF09.0620 | <i>L. major</i> | 43  | 520  | 562  |
| LmjF09.0630 | <i>L. major</i> | 110 | 50   | 159  |
| LmjF09.0630 | <i>L. major</i> | 42  | 360  | 401  |
| LmjF09.0630 | <i>L. major</i> | 52  | 622  | 673  |
| LmjF09.0630 | <i>L. major</i> | 91  | 688  | 778  |
| LmjF09.0630 | <i>L. major</i> | 291 | 780  | 1070 |
| LmjF09.0630 | <i>L. major</i> | 78  | 1084 | 1161 |
| LmjF09.0640 | <i>L. major</i> | 48  | 141  | 188  |
| LmjF09.0640 | <i>L. major</i> | 54  | 408  | 461  |
| LmjF09.0640 | <i>L. major</i> | 54  | 408  | 461  |
| LmjF09.0650 | <i>L. major</i> | 65  | 465  | 529  |
| LmjF09.0660 | <i>L. major</i> | 70  | 1    | 70   |
| LmjF09.0660 | <i>L. major</i> | 44  | 178  | 221  |
| LmjF09.0670 | <i>L. major</i> | 48  | 1    | 48   |
| LmjF09.0670 | <i>L. major</i> | 42  | 97   | 138  |
| LmjF09.0670 | <i>L. major</i> | 42  | 97   | 138  |
| LmjF09.0680 | <i>L. major</i> | 71  | 60   | 130  |
| LmjF09.0680 | <i>L. major</i> | 45  | 182  | 226  |
| LmjF09.0680 | <i>L. major</i> | 79  | 259  | 337  |
| LmjF09.0700 | <i>L. major</i> | 189 | 1    | 189  |
| LmjF09.0700 | <i>L. major</i> | 189 | 268  | 456  |
| LmjF09.0710 | <i>L. major</i> | 84  | 1    | 84   |
| LmjF09.0710 | <i>L. major</i> | 61  | 105  | 165  |
| LmjF09.0710 | <i>L. major</i> | 103 | 214  | 316  |
| LmjF09.0710 | <i>L. major</i> | 62  | 338  | 399  |
| LmjF09.0710 | <i>L. major</i> | 56  | 428  | 483  |
| LmjF09.0720 | <i>L. major</i> | 132 | 208  | 339  |
| LmjF09.0730 | <i>L. major</i> | 87  | 417  | 503  |
| LmjF09.0740 | <i>L. major</i> | 45  | 278  | 322  |
| LmjF09.0740 | <i>L. major</i> | 63  | 894  | 956  |
| LmjF09.0740 | <i>L. major</i> | 45  | 1244 | 1288 |
| LmjF09.0740 | <i>L. major</i> | 64  | 1330 | 1393 |
| LmjF09.0740 | <i>L. major</i> | 79  | 1546 | 1624 |
| LmjF09.0750 | <i>L. major</i> | 40  | 155  | 194  |
| LmjF09.0750 | <i>L. major</i> | 41  | 218  | 258  |
| LmjF09.0750 | <i>L. major</i> | 55  | 428  | 482  |
| LmjF09.0750 | <i>L. major</i> | 94  | 788  | 881  |
| LmjF09.0760 | <i>L. major</i> | 51  | 42   | 92   |
| LmjF09.0760 | <i>L. major</i> | 112 | 106  | 217  |
| LmjF09.0760 | <i>L. major</i> | 77  | 271  | 347  |
| LmjF09.0760 | <i>L. major</i> | 40  | 694  | 733  |

|             |                 |     |      |      |
|-------------|-----------------|-----|------|------|
| LmjF09.0760 | <i>L. major</i> | 45  | 742  | 786  |
| LmjF09.0760 | <i>L. major</i> | 108 | 821  | 928  |
| LmjF09.0760 | <i>L. major</i> | 71  | 961  | 1031 |
| LmjF09.0760 | <i>L. major</i> | 53  | 1241 | 1293 |
| LmjF09.0760 | <i>L. major</i> | 104 | 1391 | 1494 |
| LmjF09.0760 | <i>L. major</i> | 57  | 1585 | 1641 |
| LmjF09.0760 | <i>L. major</i> | 45  | 1769 | 1813 |
| LmjF09.0760 | <i>L. major</i> | 48  | 1828 | 1875 |
| LmjF09.0760 | <i>L. major</i> | 50  | 2008 | 2057 |
| LmjF09.0760 | <i>L. major</i> | 64  | 2195 | 2258 |
| LmjF09.0760 | <i>L. major</i> | 69  | 2264 | 2332 |
| LmjF09.0760 | <i>L. major</i> | 88  | 2362 | 2449 |
| LmjF09.0760 | <i>L. major</i> | 55  | 2538 | 2592 |
| LmjF09.0760 | <i>L. major</i> | 80  | 2644 | 2723 |
| LmjF09.0760 | <i>L. major</i> | 61  | 2802 | 2862 |
| LmjF09.0760 | <i>L. major</i> | 184 | 2990 | 3173 |
| LmjF09.0760 | <i>L. major</i> | 99  | 3228 | 3326 |
| LmjF09.0760 | <i>L. major</i> | 50  | 3610 | 3659 |
| LmjF09.0760 | <i>L. major</i> | 75  | 3745 | 3819 |
| LmjF09.0760 | <i>L. major</i> | 80  | 3839 | 3918 |
| LmjF09.0760 | <i>L. major</i> | 75  | 4241 | 4315 |
| LmjF09.0760 | <i>L. major</i> | 150 | 4504 | 4653 |
| LmjF09.0760 | <i>L. major</i> | 61  | 4709 | 4769 |
| LmjF09.0760 | <i>L. major</i> | 77  | 4891 | 4967 |
| LmjF09.0760 | <i>L. major</i> | 90  | 4995 | 5084 |
| LmjF09.0760 | <i>L. major</i> | 262 | 5120 | 5381 |
| LmjF09.0760 | <i>L. major</i> | 57  | 5425 | 5481 |
| LmjF09.0770 | <i>L. major</i> | 60  | 1    | 60   |
| LmjF09.0790 | <i>L. major</i> | 91  | 1    | 91   |
| LmjF09.0790 | <i>L. major</i> | 241 | 99   | 339  |
| LmjF09.0790 | <i>L. major</i> | 83  | 364  | 446  |
| LmjF09.0790 | <i>L. major</i> | 81  | 469  | 549  |
| LmjF09.0790 | <i>L. major</i> | 45  | 655  | 699  |
| LmjF09.0790 | <i>L. major</i> | 77  | 1075 | 1151 |
| LmjF09.0800 | <i>L. major</i> | 191 | 10   | 200  |
| LmjF09.0800 | <i>L. major</i> | 185 | 306  | 490  |
| LmjF09.0800 | <i>L. major</i> | 66  | 526  | 591  |
| LmjF09.0800 | <i>L. major</i> | 308 | 678  | 985  |
| LmjF09.0800 | <i>L. major</i> | 210 | 1030 | 1239 |
| LmjF09.0810 | <i>L. major</i> | 45  | 84   | 128  |
| LmjF09.0820 | <i>L. major</i> | 88  | 257  | 344  |
| LmjF09.0820 | <i>L. major</i> | 41  | 490  | 530  |
| LmjF09.0830 | <i>L. major</i> | 53  | 1    | 53   |
| LmjF09.0830 | <i>L. major</i> | 60  | 410  | 469  |
| LmjF09.0830 | <i>L. major</i> | 60  | 410  | 469  |
| LmjF09.0850 | <i>L. major</i> | 54  | 1    | 54   |
| LmjF09.0850 | <i>L. major</i> | 62  | 206  | 267  |

|             |                 |     |      |      |
|-------------|-----------------|-----|------|------|
| LmjF09.0850 | <i>L. major</i> | 62  | 206  | 267  |
| LmjF09.0870 | <i>L. major</i> | 86  | 1    | 86   |
| LmjF09.0870 | <i>L. major</i> | 75  | 106  | 180  |
| LmjF09.0870 | <i>L. major</i> | 169 | 194  | 362  |
| LmjF09.0870 | <i>L. major</i> | 50  | 370  | 419  |
| LmjF09.0880 | <i>L. major</i> | 76  | 1    | 76   |
| LmjF09.0880 | <i>L. major</i> | 368 | 117  | 484  |
| LmjF09.0890 | <i>L. major</i> | 136 | 163  | 298  |
| LmjF09.0890 | <i>L. major</i> | 283 | 435  | 717  |
| LmjF09.0890 | <i>L. major</i> | 87  | 998  | 1084 |
| LmjF09.0890 | <i>L. major</i> | 86  | 1086 | 1171 |
| LmjF09.0890 | <i>L. major</i> | 105 | 1217 | 1321 |
| LmjF09.0890 | <i>L. major</i> | 63  | 1346 | 1408 |
| LmjF09.0890 | <i>L. major</i> | 64  | 1449 | 1512 |
| LmjF09.0890 | <i>L. major</i> | 223 | 1582 | 1804 |
| LmjF09.0890 | <i>L. major</i> | 89  | 1971 | 2059 |
| LmjF09.0890 | <i>L. major</i> | 64  | 2462 | 2525 |
| LmjF09.0900 | <i>L. major</i> | 63  | 105  | 167  |
| LmjF09.0910 | <i>L. major</i> | 89  | 1    | 89   |
| LmjF09.0920 | <i>L. major</i> | 89  | 1    | 89   |
| LmjF09.0930 | <i>L. major</i> | 89  | 1    | 89   |
| LmjF09.0940 | <i>L. major</i> | 56  | 168  | 223  |
| LmjF09.0940 | <i>L. major</i> | 47  | 529  | 575  |
| LmjF09.0940 | <i>L. major</i> | 325 | 746  | 1070 |
| LmjF09.0940 | <i>L. major</i> | 64  | 1137 | 1200 |
| LmjF09.0950 | <i>L. major</i> | 53  | 158  | 210  |
| LmjF09.0950 | <i>L. major</i> | 45  | 248  | 292  |
| LmjF09.0950 | <i>L. major</i> | 63  | 447  | 509  |
| LmjF09.0960 | <i>L. major</i> | 43  | 33   | 75   |
| LmjF09.0960 | <i>L. major</i> | 90  | 457  | 546  |
| LmjF09.0960 | <i>L. major</i> | 90  | 457  | 546  |
| LmjF09.0970 | <i>L. major</i> | 62  | 203  | 264  |
| LmjF09.0980 | <i>L. major</i> | 277 | 12   | 288  |
| LmjF09.0980 | <i>L. major</i> | 62  | 307  | 368  |
| LmjF09.0980 | <i>L. major</i> | 104 | 439  | 542  |
| LmjF09.0980 | <i>L. major</i> | 394 | 560  | 953  |
| LmjF09.0990 | <i>L. major</i> | 44  | 211  | 254  |
| LmjF09.0990 | <i>L. major</i> | 49  | 1045 | 1093 |
| LmjF09.0990 | <i>L. major</i> | 118 | 1165 | 1282 |
| LmjF09.0990 | <i>L. major</i> | 93  | 1734 | 1826 |
| LmjF09.0990 | <i>L. major</i> | 48  | 1912 | 1959 |
| LmjF09.0990 | <i>L. major</i> | 141 | 1979 | 2119 |
| LmjF09.0990 | <i>L. major</i> | 77  | 2158 | 2234 |
| LmjF09.0990 | <i>L. major</i> | 77  | 2324 | 2400 |
| LmjF09.0990 | <i>L. major</i> | 76  | 2611 | 2686 |
| LmjF09.0990 | <i>L. major</i> | 185 | 2828 | 3012 |
| LmjF09.0990 | <i>L. major</i> | 177 | 3139 | 3315 |



|             |                 |     |      |      |
|-------------|-----------------|-----|------|------|
| LmjF09.0990 | <i>L. major</i> | 201 | 3532 | 3732 |
| LmjF09.0990 | <i>L. major</i> | 48  | 4209 | 4256 |
| LmjF09.0990 | <i>L. major</i> | 86  | 4693 | 4778 |
| LmjF09.0990 | <i>L. major</i> | 41  | 4867 | 4907 |
| LmjF09.0990 | <i>L. major</i> | 165 | 4909 | 5073 |
| LmjF09.0990 | <i>L. major</i> | 45  | 5153 | 5197 |
| LmjF09.0990 | <i>L. major</i> | 75  | 5307 | 5381 |
| LmjF09.1000 | <i>L. major</i> | 58  | 125  | 182  |
| LmjF09.1010 | <i>L. major</i> | 127 | 28   | 154  |
| LmjF09.1010 | <i>L. major</i> | 48  | 486  | 533  |
| LmjF09.1020 | <i>L. major</i> | 106 | 1    | 106  |
| LmjF09.1030 | <i>L. major</i> | 109 | 1    | 109  |
| LmjF09.1030 | <i>L. major</i> | 155 | 111  | 265  |
| LmjF09.1040 | <i>L. major</i> | 94  | 1    | 94   |
| LmjF09.1050 | <i>L. major</i> | 69  | 138  | 206  |
| LmjF09.1060 | <i>L. major</i> | 49  | 144  | 192  |
| LmjF09.1090 | <i>L. major</i> | 58  | 392  | 449  |
| LmjF09.1100 | <i>L. major</i> | 41  | 1    | 41   |
| LmjF09.1100 | <i>L. major</i> | 183 | 44   | 226  |
| LmjF09.1100 | <i>L. major</i> | 183 | 44   | 226  |
| LmjF09.1110 | <i>L. major</i> | 183 | 1    | 183  |
| LmjF09.1110 | <i>L. major</i> | 240 | 219  | 458  |
| LmjF09.1120 | <i>L. major</i> | 55  | 25   | 79   |
| LmjF09.1140 | <i>L. major</i> | 61  | 1    | 61   |
| LmjF09.1140 | <i>L. major</i> | 43  | 144  | 186  |
| LmjF09.1150 | <i>L. major</i> | 58  | 1    | 58   |
| LmjF09.1150 | <i>L. major</i> | 70  | 218  | 287  |
| LmjF09.1160 | <i>L. major</i> | 60  | 1    | 60   |
| LmjF09.1160 | <i>L. major</i> | 73  | 227  | 299  |
| LmjF09.1160 | <i>L. major</i> | 62  | 445  | 506  |
| LmjF09.1160 | <i>L. major</i> | 48  | 537  | 584  |
| LmjF09.1180 | <i>L. major</i> | 580 | 64   | 643  |
| LmjF09.1180 | <i>L. major</i> | 134 | 723  | 856  |
| LmjF09.1190 | <i>L. major</i> | 86  | 114  | 199  |
| LmjF09.1190 | <i>L. major</i> | 122 | 390  | 511  |
| LmjF09.1200 | <i>L. major</i> | 104 | 1    | 104  |
| LmjF09.1200 | <i>L. major</i> | 92  | 143  | 234  |
| LmjF09.1200 | <i>L. major</i> | 66  | 560  | 625  |
| LmjF09.1200 | <i>L. major</i> | 56  | 818  | 873  |
| LmjF09.1200 | <i>L. major</i> | 157 | 895  | 1051 |
| LmjF09.1200 | <i>L. major</i> | 55  | 1149 | 1203 |
| LmjF09.1200 | <i>L. major</i> | 73  | 1343 | 1415 |
| LmjF09.1210 | <i>L. major</i> | 191 | 234  | 424  |
| LmjF09.1220 | <i>L. major</i> | 47  | 80   | 126  |
| LmjF09.1220 | <i>L. major</i> | 78  | 334  | 411  |
| LmjF09.1220 | <i>L. major</i> | 131 | 432  | 562  |
| LmjF09.1220 | <i>L. major</i> | 40  | 583  | 622  |

|             |                 |     |      |      |
|-------------|-----------------|-----|------|------|
| LmjF09.1230 | <i>L. major</i> | 69  | 1    | 69   |
| LmjF09.1230 | <i>L. major</i> | 51  | 358  | 408  |
| LmjF09.1230 | <i>L. major</i> | 51  | 358  | 408  |
| LmjF09.1240 | <i>L. major</i> | 46  | 245  | 290  |
| LmjF09.1240 | <i>L. major</i> | 52  | 335  | 386  |
| LmjF09.1240 | <i>L. major</i> | 47  | 841  | 887  |
| LmjF09.1240 | <i>L. major</i> | 265 | 954  | 1218 |
| LmjF09.1240 | <i>L. major</i> | 117 | 1328 | 1444 |
| LmjF09.1240 | <i>L. major</i> | 53  | 1793 | 1845 |
| LmjF09.1260 | <i>L. major</i> | 44  | 128  | 171  |
| LmjF09.1260 | <i>L. major</i> | 173 | 296  | 468  |
| LmjF09.1280 | <i>L. major</i> | 55  | 1    | 55   |
| LmjF09.1280 | <i>L. major</i> | 61  | 90   | 150  |
| LmjF09.1280 | <i>L. major</i> | 94  | 211  | 304  |
| LmjF09.1290 | <i>L. major</i> | 56  | 1    | 56   |
| LmjF09.1290 | <i>L. major</i> | 54  | 98   | 151  |
| LmjF09.1290 | <i>L. major</i> | 187 | 198  | 384  |
| LmjF09.1310 | <i>L. major</i> | 51  | 204  | 254  |
| LmjF09.1315 | <i>L. major</i> | 57  | 146  | 202  |
| LmjF09.1315 | <i>L. major</i> | 77  | 274  | 350  |
| LmjF09.1320 | <i>L. major</i> | 109 | 246  | 354  |
| LmjF09.1320 | <i>L. major</i> | 65  | 541  | 605  |
| LmjF09.1320 | <i>L. major</i> | 65  | 541  | 605  |
| LmjF09.1330 | <i>L. major</i> | 45  | 84   | 128  |
| LmjF09.1330 | <i>L. major</i> | 53  | 159  | 211  |
| LmjF09.1330 | <i>L. major</i> | 53  | 159  | 211  |
| LmjF09.1340 | <i>L. major</i> | 40  | 1    | 40   |
| LmjF09.1360 | <i>L. major</i> | 140 | 1    | 140  |
| LmjF09.1370 | <i>L. major</i> | 69  | 1    | 69   |
| LmjF09.1370 | <i>L. major</i> | 133 | 136  | 268  |
| LmjF09.1380 | <i>L. major</i> | 214 | 1    | 214  |
| LmjF09.1380 | <i>L. major</i> | 55  | 276  | 330  |
| LmjF09.1380 | <i>L. major</i> | 56  | 500  | 555  |
| LmjF09.1390 | <i>L. major</i> | 74  | 22   | 95   |
| LmjF09.1400 | <i>L. major</i> | 123 | 133  | 255  |
| LmjF09.1410 | <i>L. major</i> | 66  | 57   | 122  |
| LmjF09.1410 | <i>L. major</i> | 126 | 146  | 271  |
| LmjF09.1410 | <i>L. major</i> | 44  | 530  | 573  |
| LmjF09.1420 | <i>L. major</i> | 108 | 32   | 139  |
| LmjF09.1440 | <i>L. major</i> | 128 | 93   | 220  |
| LmjF09.1440 | <i>L. major</i> | 83  | 245  | 327  |
| LmjF09.1440 | <i>L. major</i> | 85  | 329  | 413  |
| LmjF09.1480 | <i>L. major</i> | 42  | 351  | 392  |
| LmjF09.1480 | <i>L. major</i> | 42  | 528  | 569  |
| LmjF09.1480 | <i>L. major</i> | 42  | 528  | 569  |
| LmjF09.1505 | <i>L. major</i> | 59  | 1    | 59   |
| LmjF09.1510 | <i>L. major</i> | 43  | 59   | 101  |

|             |                 |     |      |      |
|-------------|-----------------|-----|------|------|
| LmjF09.1510 | <i>L. major</i> | 71  | 136  | 206  |
| LmjF09.1510 | <i>L. major</i> | 96  | 1075 | 1170 |
| LmjF09.1530 | <i>L. major</i> | 50  | 59   | 108  |
| LmjF09.1540 | <i>L. major</i> | 477 | 1    | 477  |
| LmjF09.1540 | <i>L. major</i> | 106 | 502  | 607  |
| LmjF09.1550 | <i>L. major</i> | 45  | 1    | 45   |
| LmjF10.0020 | <i>L. major</i> | 44  | 274  | 317  |
| LmjF10.0030 | <i>L. major</i> | 58  | 258  | 315  |
| LmjF10.0060 | <i>L. major</i> | 40  | 114  | 153  |
| LmjF10.0080 | <i>L. major</i> | 41  | 68   | 108  |
| LmjF10.0100 | <i>L. major</i> | 237 | 1    | 237  |
| LmjF10.0120 | <i>L. major</i> | 54  | 1    | 54   |
| LmjF10.0120 | <i>L. major</i> | 63  | 73   | 135  |
| LmjF10.0120 | <i>L. major</i> | 60  | 202  | 261  |
| LmjF10.0130 | <i>L. major</i> | 56  | 164  | 219  |
| LmjF10.0130 | <i>L. major</i> | 114 | 267  | 380  |
| LmjF10.0130 | <i>L. major</i> | 245 | 400  | 644  |
| LmjF10.0130 | <i>L. major</i> | 80  | 656  | 735  |
| LmjF10.0140 | <i>L. major</i> | 54  | 1    | 54   |
| LmjF10.0140 | <i>L. major</i> | 147 | 79   | 225  |
| LmjF10.0150 | <i>L. major</i> | 48  | 64   | 111  |
| LmjF10.0150 | <i>L. major</i> | 189 | 131  | 319  |
| LmjF10.0150 | <i>L. major</i> | 50  | 322  | 371  |
| LmjF10.0160 | <i>L. major</i> | 436 | 70   | 505  |
| LmjF10.0170 | <i>L. major</i> | 54  | 39   | 92   |
| LmjF10.0170 | <i>L. major</i> | 99  | 416  | 514  |
| LmjF10.0170 | <i>L. major</i> | 99  | 416  | 514  |
| LmjF10.0185 | <i>L. major</i> | 41  | 1    | 41   |
| LmjF10.0185 | <i>L. major</i> | 47  | 108  | 154  |
| LmjF10.0185 | <i>L. major</i> | 47  | 108  | 154  |
| LmjF10.0190 | <i>L. major</i> | 51  | 45   | 95   |
| LmjF10.0190 | <i>L. major</i> | 126 | 115  | 240  |
| LmjF10.0190 | <i>L. major</i> | 282 | 294  | 575  |
| LmjF10.0195 | <i>L. major</i> | 90  | 1    | 90   |
| LmjF10.0200 | <i>L. major</i> | 50  | 358  | 407  |
| LmjF10.0210 | <i>L. major</i> | 54  | 420  | 473  |
| LmjF10.0218 | <i>L. major</i> | 56  | 62   | 117  |
| LmjF10.0219 | <i>L. major</i> | 53  | 224  | 276  |
| LmjF10.0220 | <i>L. major</i> | 117 | 1    | 117  |
| LmjF10.0230 | <i>L. major</i> | 44  | 1    | 44   |
| LmjF10.0240 | <i>L. major</i> | 438 | 97   | 534  |
| LmjF10.0240 | <i>L. major</i> | 131 | 538  | 668  |
| LmjF10.0250 | <i>L. major</i> | 73  | 36   | 108  |
| LmjF10.0250 | <i>L. major</i> | 48  | 212  | 259  |
| LmjF10.0250 | <i>L. major</i> | 48  | 212  | 259  |
| LmjF10.0270 | <i>L. major</i> | 92  | 1    | 92   |
| LmjF10.0270 | <i>L. major</i> | 58  | 153  | 210  |

|             |                 |     |      |      |
|-------------|-----------------|-----|------|------|
| LmjF10.0270 | <i>L. major</i> | 114 | 252  | 365  |
| LmjF10.0270 | <i>L. major</i> | 73  | 374  | 446  |
| LmjF10.0270 | <i>L. major</i> | 94  | 654  | 747  |
| LmjF10.0270 | <i>L. major</i> | 61  | 750  | 810  |
| LmjF10.0270 | <i>L. major</i> | 72  | 860  | 931  |
| LmjF10.0280 | <i>L. major</i> | 88  | 40   | 127  |
| LmjF10.0280 | <i>L. major</i> | 113 | 220  | 332  |
| LmjF10.0280 | <i>L. major</i> | 65  | 476  | 540  |
| LmjF10.0280 | <i>L. major</i> | 590 | 566  | 1155 |
| LmjF10.0280 | <i>L. major</i> | 88  | 1341 | 1428 |
| LmjF10.0280 | <i>L. major</i> | 103 | 1623 | 1725 |
| LmjF10.0280 | <i>L. major</i> | 48  | 1832 | 1879 |
| LmjF10.0280 | <i>L. major</i> | 119 | 1905 | 2023 |
| LmjF10.0280 | <i>L. major</i> | 173 | 2173 | 2345 |
| LmjF10.0300 | <i>L. major</i> | 264 | 1    | 264  |
| LmjF10.0300 | <i>L. major</i> | 331 | 275  | 605  |
| LmjF10.0320 | <i>L. major</i> | 124 | 66   | 189  |
| LmjF10.0320 | <i>L. major</i> | 48  | 220  | 267  |
| LmjF10.0320 | <i>L. major</i> | 76  | 322  | 397  |
| LmjF10.0320 | <i>L. major</i> | 40  | 446  | 485  |
| LmjF10.0320 | <i>L. major</i> | 108 | 579  | 686  |
| LmjF10.0320 | <i>L. major</i> | 186 | 729  | 914  |
| LmjF10.0320 | <i>L. major</i> | 130 | 925  | 1054 |
| LmjF10.0320 | <i>L. major</i> | 179 | 1170 | 1348 |
| LmjF10.0320 | <i>L. major</i> | 310 | 1382 | 1691 |
| LmjF10.0320 | <i>L. major</i> | 140 | 1780 | 1919 |
| LmjF10.0330 | <i>L. major</i> | 46  | 171  | 216  |
| LmjF10.0330 | <i>L. major</i> | 52  | 246  | 297  |
| LmjF10.0330 | <i>L. major</i> | 129 | 306  | 434  |
| LmjF10.0360 | <i>L. major</i> | 62  | 245  | 306  |
| LmjF10.0360 | <i>L. major</i> | 40  | 626  | 665  |
| LmjF10.0360 | <i>L. major</i> | 40  | 626  | 665  |
| LmjF10.0370 | <i>L. major</i> | 62  | 182  | 243  |
| LmjF10.0380 | <i>L. major</i> | 62  | 264  | 325  |
| LmjF10.0380 | <i>L. major</i> | 44  | 648  | 691  |
| LmjF10.0380 | <i>L. major</i> | 44  | 648  | 691  |
| LmjF10.0385 | <i>L. major</i> | 62  | 275  | 336  |
| LmjF10.0385 | <i>L. major</i> | 51  | 658  | 708  |
| LmjF10.0385 | <i>L. major</i> | 51  | 658  | 708  |
| LmjF10.0390 | <i>L. major</i> | 69  | 1    | 69   |
| LmjF10.0390 | <i>L. major</i> | 62  | 309  | 370  |
| LmjF10.0390 | <i>L. major</i> | 40  | 693  | 732  |
| LmjF10.0400 | <i>L. major</i> | 78  | 293  | 370  |
| LmjF10.0440 | <i>L. major</i> | 59  | 39   | 97   |
| LmjF10.0483 | <i>L. major</i> | 216 | 36   | 251  |
| LmjF10.0483 | <i>L. major</i> | 93  | 261  | 353  |
| LmjF10.0483 | <i>L. major</i> | 99  | 390  | 488  |

|             |                 |     |      |      |
|-------------|-----------------|-----|------|------|
| LmjF10.0485 | <i>L. major</i> | 42  | 76   | 117  |
| LmjF10.0485 | <i>L. major</i> | 64  | 147  | 210  |
| LmjF10.0485 | <i>L. major</i> | 64  | 147  | 210  |
| LmjF10.0500 | <i>L. major</i> | 92  | 411  | 502  |
| LmjF10.0500 | <i>L. major</i> | 58  | 2339 | 2396 |
| LmjF10.0500 | <i>L. major</i> | 50  | 4849 | 4898 |
| LmjF10.0500 | <i>L. major</i> | 45  | 5560 | 5604 |
| LmjF10.0500 | <i>L. major</i> | 296 | 6440 | 6735 |
| LmjF10.0520 | <i>L. major</i> | 80  | 21   | 100  |
| LmjF10.0520 | <i>L. major</i> | 40  | 135  | 174  |
| LmjF10.0520 | <i>L. major</i> | 139 | 354  | 492  |
| LmjF10.0520 | <i>L. major</i> | 165 | 743  | 907  |
| LmjF10.0530 | <i>L. major</i> | 56  | 1    | 56   |
| LmjF10.0530 | <i>L. major</i> | 127 | 66   | 192  |
| LmjF10.0530 | <i>L. major</i> | 121 | 222  | 342  |
| LmjF10.0530 | <i>L. major</i> | 74  | 364  | 437  |
| LmjF10.0530 | <i>L. major</i> | 99  | 446  | 544  |
| LmjF10.0530 | <i>L. major</i> | 125 | 565  | 689  |
| LmjF10.0530 | <i>L. major</i> | 70  | 695  | 764  |
| LmjF10.0530 | <i>L. major</i> | 370 | 775  | 1144 |
| LmjF10.0540 | <i>L. major</i> | 59  | 242  | 300  |
| LmjF10.0540 | <i>L. major</i> | 58  | 517  | 574  |
| LmjF10.0540 | <i>L. major</i> | 110 | 576  | 685  |
| LmjF10.0540 | <i>L. major</i> | 163 | 765  | 927  |
| LmjF10.0540 | <i>L. major</i> | 131 | 958  | 1088 |
| LmjF10.0550 | <i>L. major</i> | 60  | 1    | 60   |
| LmjF10.0550 | <i>L. major</i> | 85  | 347  | 431  |
| LmjF10.0570 | <i>L. major</i> | 44  | 90   | 133  |
| LmjF10.0570 | <i>L. major</i> | 50  | 429  | 478  |
| LmjF10.0570 | <i>L. major</i> | 50  | 429  | 478  |
| LmjF10.0580 | <i>L. major</i> | 190 | 61   | 250  |
| LmjF10.0580 | <i>L. major</i> | 60  | 266  | 325  |
| LmjF10.0580 | <i>L. major</i> | 78  | 428  | 505  |
| LmjF10.0580 | <i>L. major</i> | 49  | 545  | 593  |
| LmjF10.0580 | <i>L. major</i> | 167 | 641  | 807  |
| LmjF10.0610 | <i>L. major</i> | 54  | 34   | 87   |
| LmjF10.0610 | <i>L. major</i> | 99  | 136  | 234  |
| LmjF10.0610 | <i>L. major</i> | 46  | 252  | 297  |
| LmjF10.0640 | <i>L. major</i> | 107 | 102  | 208  |
| LmjF10.0650 | <i>L. major</i> | 135 | 62   | 196  |
| LmjF10.0650 | <i>L. major</i> | 49  | 238  | 286  |
| LmjF10.0660 | <i>L. major</i> | 222 | 133  | 354  |
| LmjF10.0660 | <i>L. major</i> | 280 | 361  | 640  |
| LmjF10.0660 | <i>L. major</i> | 60  | 663  | 722  |
| LmjF10.0660 | <i>L. major</i> | 177 | 749  | 925  |
| LmjF10.0660 | <i>L. major</i> | 387 | 941  | 1327 |
| LmjF10.0660 | <i>L. major</i> | 156 | 1358 | 1513 |

|             |                 |      |      |      |
|-------------|-----------------|------|------|------|
| LmjF10.0660 | <i>L. major</i> | 423  | 1520 | 1942 |
| LmjF10.0670 | <i>L. major</i> | 88   | 32   | 119  |
| LmjF10.0680 | <i>L. major</i> | 66   | 1    | 66   |
| LmjF10.0680 | <i>L. major</i> | 304  | 72   | 375  |
| LmjF10.0690 | <i>L. major</i> | 86   | 210  | 295  |
| LmjF10.0690 | <i>L. major</i> | 43   | 337  | 379  |
| LmjF10.0690 | <i>L. major</i> | 70   | 1201 | 1270 |
| LmjF10.0690 | <i>L. major</i> | 52   | 1312 | 1363 |
| LmjF10.0690 | <i>L. major</i> | 46   | 1417 | 1462 |
| LmjF10.0690 | <i>L. major</i> | 55   | 1553 | 1607 |
| LmjF10.0700 | <i>L. major</i> | 205  | 114  | 318  |
| LmjF10.0700 | <i>L. major</i> | 45   | 320  | 364  |
| LmjF10.0700 | <i>L. major</i> | 64   | 441  | 504  |
| LmjF10.0700 | <i>L. major</i> | 106  | 783  | 888  |
| LmjF10.0710 | <i>L. major</i> | 73   | 1    | 73   |
| LmjF10.0715 | <i>L. major</i> | 73   | 1    | 73   |
| LmjF10.0720 | <i>L. major</i> | 73   | 1    | 73   |
| LmjF10.0730 | <i>L. major</i> | 45   | 103  | 147  |
| LmjF10.0740 | <i>L. major</i> | 68   | 57   | 124  |
| LmjF10.0750 | <i>L. major</i> | 373  | 20   | 392  |
| LmjF10.0750 | <i>L. major</i> | 209  | 421  | 629  |
| LmjF10.0750 | <i>L. major</i> | 491  | 664  | 1154 |
| LmjF10.0750 | <i>L. major</i> | 247  | 1225 | 1471 |
| LmjF10.0750 | <i>L. major</i> | 113  | 1499 | 1611 |
| LmjF10.0750 | <i>L. major</i> | 154  | 1627 | 1780 |
| LmjF10.0750 | <i>L. major</i> | 157  | 1839 | 1995 |
| LmjF10.0760 | <i>L. major</i> | 64   | 1    | 64   |
| LmjF10.0760 | <i>L. major</i> | 98   | 136  | 233  |
| LmjF10.0760 | <i>L. major</i> | 44   | 337  | 380  |
| LmjF10.0760 | <i>L. major</i> | 52   | 464  | 515  |
| LmjF10.0770 | <i>L. major</i> | 114  | 168  | 281  |
| LmjF10.0770 | <i>L. major</i> | 49   | 457  | 505  |
| LmjF10.0770 | <i>L. major</i> | 49   | 457  | 505  |
| LmjF10.0790 | <i>L. major</i> | 221  | 1    | 221  |
| LmjF10.0800 | <i>L. major</i> | 297  | 101  | 397  |
| LmjF10.0800 | <i>L. major</i> | 388  | 698  | 1085 |
| LmjF10.0810 | <i>L. major</i> | 84   | 187  | 270  |
| LmjF10.0810 | <i>L. major</i> | 80   | 388  | 467  |
| LmjF10.0810 | <i>L. major</i> | 47   | 639  | 685  |
| LmjF10.0810 | <i>L. major</i> | 82   | 702  | 783  |
| LmjF10.0810 | <i>L. major</i> | 68   | 1009 | 1076 |
| LmjF10.0810 | <i>L. major</i> | 181  | 1394 | 1574 |
| LmjF10.0810 | <i>L. major</i> | 245  | 1581 | 1825 |
| LmjF10.0820 | <i>L. major</i> | 83   | 1    | 83   |
| LmjF10.0820 | <i>L. major</i> | 63   | 89   | 151  |
| LmjF10.0830 | <i>L. major</i> | 1058 | 1    | 1058 |
| LmjF10.0830 | <i>L. major</i> | 75   | 1181 | 1255 |

|             |                 |     |      |      |
|-------------|-----------------|-----|------|------|
| LmjF10.0840 | <i>L. major</i> | 64  | 314  | 377  |
| LmjF10.0840 | <i>L. major</i> | 41  | 494  | 534  |
| LmjF10.0840 | <i>L. major</i> | 41  | 494  | 534  |
| LmjF10.0860 | <i>L. major</i> | 55  | 67   | 121  |
| LmjF10.0870 | <i>L. major</i> | 49  | 1    | 49   |
| LmjF10.0880 | <i>L. major</i> | 193 | 1    | 193  |
| LmjF10.0880 | <i>L. major</i> | 346 | 221  | 566  |
| LmjF10.0880 | <i>L. major</i> | 76  | 609  | 684  |
| LmjF10.0880 | <i>L. major</i> | 300 | 697  | 996  |
| LmjF10.0880 | <i>L. major</i> | 103 | 1016 | 1118 |
| LmjF10.0890 | <i>L. major</i> | 56  | 1    | 56   |
| LmjF10.0900 | <i>L. major</i> | 179 | 49   | 227  |
| LmjF10.0900 | <i>L. major</i> | 63  | 260  | 322  |
| LmjF10.0900 | <i>L. major</i> | 59  | 338  | 396  |
| LmjF10.0900 | <i>L. major</i> | 452 | 751  | 1202 |
| LmjF10.0900 | <i>L. major</i> | 53  | 1253 | 1305 |
| LmjF10.0900 | <i>L. major</i> | 67  | 1341 | 1407 |
| LmjF10.0900 | <i>L. major</i> | 66  | 1435 | 1500 |
| LmjF10.0900 | <i>L. major</i> | 87  | 1600 | 1686 |
| LmjF10.0940 | <i>L. major</i> | 68  | 1    | 68   |
| LmjF10.0940 | <i>L. major</i> | 240 | 360  | 599  |
| LmjF10.0940 | <i>L. major</i> | 97  | 601  | 697  |
| LmjF10.0940 | <i>L. major</i> | 185 | 699  | 883  |
| LmjF10.0940 | <i>L. major</i> | 163 | 1059 | 1221 |
| LmjF10.0950 | <i>L. major</i> | 125 | 128  | 252  |
| LmjF10.0960 | <i>L. major</i> | 118 | 1    | 118  |
| LmjF10.0960 | <i>L. major</i> | 109 | 247  | 355  |
| LmjF10.0960 | <i>L. major</i> | 150 | 529  | 678  |
| LmjF10.0960 | <i>L. major</i> | 126 | 680  | 805  |
| LmjF10.0970 | <i>L. major</i> | 173 | 1    | 173  |
| LmjF10.0980 | <i>L. major</i> | 45  | 119  | 163  |
| LmjF10.0980 | <i>L. major</i> | 55  | 229  | 283  |
| LmjF10.0980 | <i>L. major</i> | 47  | 393  | 439  |
| LmjF10.0980 | <i>L. major</i> | 136 | 466  | 601  |
| LmjF10.0990 | <i>L. major</i> | 49  | 1    | 49   |
| LmjF10.1000 | <i>L. major</i> | 63  | 33   | 95   |
| LmjF10.1000 | <i>L. major</i> | 49  | 224  | 272  |
| LmjF10.1000 | <i>L. major</i> | 49  | 224  | 272  |
| LmjF10.1020 | <i>L. major</i> | 78  | 1    | 78   |
| LmjF10.1030 | <i>L. major</i> | 169 | 1    | 169  |
| LmjF10.1030 | <i>L. major</i> | 56  | 324  | 379  |
| LmjF10.1040 | <i>L. major</i> | 111 | 167  | 277  |
| LmjF10.1040 | <i>L. major</i> | 69  | 579  | 647  |
| LmjF10.1040 | <i>L. major</i> | 97  | 718  | 814  |
| LmjF10.1040 | <i>L. major</i> | 44  | 955  | 998  |
| LmjF10.1050 | <i>L. major</i> | 50  | 99   | 148  |
| LmjF10.1060 | <i>L. major</i> | 43  | 52   | 94   |

|             |                 |     |      |      |
|-------------|-----------------|-----|------|------|
| LmjF10.1060 | <i>L. major</i> | 58  | 238  | 295  |
| LmjF10.1070 | <i>L. major</i> | 112 | 1    | 112  |
| LmjF10.1070 | <i>L. major</i> | 52  | 134  | 185  |
| LmjF10.1070 | <i>L. major</i> | 302 | 187  | 488  |
| LmjF10.1070 | <i>L. major</i> | 74  | 499  | 572  |
| LmjF10.1080 | <i>L. major</i> | 107 | 1    | 107  |
| LmjF10.1080 | <i>L. major</i> | 55  | 119  | 173  |
| LmjF10.1080 | <i>L. major</i> | 69  | 397  | 465  |
| LmjF10.1100 | <i>L. major</i> | 48  | 378  | 425  |
| LmjF10.1110 | <i>L. major</i> | 149 | 161  | 309  |
| LmjF10.1110 | <i>L. major</i> | 186 | 338  | 523  |
| LmjF10.1130 | <i>L. major</i> | 82  | 1    | 82   |
| LmjF10.1130 | <i>L. major</i> | 172 | 86   | 257  |
| LmjF10.1130 | <i>L. major</i> | 96  | 898  | 993  |
| LmjF10.1130 | <i>L. major</i> | 61  | 1273 | 1333 |
| LmjF10.1140 | <i>L. major</i> | 62  | 205  | 266  |
| LmjF10.1150 | <i>L. major</i> | 45  | 1    | 45   |
| LmjF10.1150 | <i>L. major</i> | 429 | 52   | 480  |
| LmjF10.1160 | <i>L. major</i> | 42  | 175  | 216  |
| LmjF10.1190 | <i>L. major</i> | 378 | 1    | 378  |
| LmjF10.1195 | <i>L. major</i> | 128 | 62   | 189  |
| LmjF10.1210 | <i>L. major</i> | 73  | 1    | 73   |
| LmjF10.1210 | <i>L. major</i> | 79  | 88   | 166  |
| LmjF10.1210 | <i>L. major</i> | 205 | 294  | 498  |
| LmjF10.1225 | <i>L. major</i> | 40  | 17   | 56   |
| LmjF10.1300 | <i>L. major</i> | 58  | 258  | 315  |
| LmjF10.1310 | <i>L. major</i> | 44  | 274  | 317  |
| LmjF11.0010 | <i>L. major</i> | 130 | 1    | 130  |
| LmjF11.0020 | <i>L. major</i> | 40  | 111  | 150  |
| LmjF11.0020 | <i>L. major</i> | 47  | 243  | 289  |
| LmjF11.0020 | <i>L. major</i> | 47  | 243  | 289  |
| LmjF11.0030 | <i>L. major</i> | 54  | 254  | 307  |
| LmjF11.0040 | <i>L. major</i> | 55  | 243  | 297  |
| LmjF11.0050 | <i>L. major</i> | 40  | 399  | 438  |
| LmjF11.0060 | <i>L. major</i> | 64  | 12   | 75   |
| LmjF11.0060 | <i>L. major</i> | 106 | 249  | 354  |
| LmjF11.0060 | <i>L. major</i> | 50  | 985  | 1034 |
| LmjF11.0070 | <i>L. major</i> | 48  | 1    | 48   |
| LmjF11.0070 | <i>L. major</i> | 889 | 129  | 1017 |
| LmjF11.0070 | <i>L. major</i> | 112 | 1099 | 1210 |
| LmjF11.0080 | <i>L. major</i> | 86  | 1    | 86   |
| LmjF11.0080 | <i>L. major</i> | 65  | 161  | 225  |
| LmjF11.0080 | <i>L. major</i> | 65  | 161  | 225  |
| LmjF11.0090 | <i>L. major</i> | 58  | 151  | 208  |
| LmjF11.0090 | <i>L. major</i> | 46  | 441  | 486  |
| LmjF11.0090 | <i>L. major</i> | 46  | 441  | 486  |
| LmjF11.0100 | <i>L. major</i> | 82  | 49   | 130  |



|             |                 |     |      |      |
|-------------|-----------------|-----|------|------|
| LmjF11.0140 | <i>L. major</i> | 116 | 32   | 147  |
| LmjF11.0150 | <i>L. major</i> | 284 | 1    | 284  |
| LmjF11.0150 | <i>L. major</i> | 350 | 290  | 639  |
| LmjF11.0150 | <i>L. major</i> | 220 | 666  | 885  |
| LmjF11.0160 | <i>L. major</i> | 73  | 142  | 214  |
| LmjF11.0170 | <i>L. major</i> | 159 | 121  | 279  |
| LmjF11.0170 | <i>L. major</i> | 49  | 301  | 349  |
| LmjF11.0170 | <i>L. major</i> | 327 | 391  | 717  |
| LmjF11.0190 | <i>L. major</i> | 42  | 56   | 97   |
| LmjF11.0190 | <i>L. major</i> | 57  | 553  | 609  |
| LmjF11.0190 | <i>L. major</i> | 57  | 553  | 609  |
| LmjF11.0200 | <i>L. major</i> | 146 | 1    | 146  |
| LmjF11.0210 | <i>L. major</i> | 90  | 1    | 90   |
| LmjF11.0230 | <i>L. major</i> | 87  | 56   | 142  |
| LmjF11.0230 | <i>L. major</i> | 60  | 329  | 388  |
| LmjF11.0230 | <i>L. major</i> | 51  | 395  | 445  |
| LmjF11.0230 | <i>L. major</i> | 46  | 454  | 499  |
| LmjF11.0250 | <i>L. major</i> | 242 | 1    | 242  |
| LmjF11.0250 | <i>L. major</i> | 185 | 306  | 490  |
| LmjF11.0250 | <i>L. major</i> | 87  | 546  | 632  |
| LmjF11.0250 | <i>L. major</i> | 50  | 756  | 805  |
| LmjF11.0250 | <i>L. major</i> | 130 | 861  | 990  |
| LmjF11.0290 | <i>L. major</i> | 245 | 1    | 245  |
| LmjF11.0290 | <i>L. major</i> | 114 | 261  | 374  |
| LmjF11.0290 | <i>L. major</i> | 42  | 401  | 442  |
| LmjF11.0300 | <i>L. major</i> | 162 | 17   | 178  |
| LmjF11.0310 | <i>L. major</i> | 61  | 1    | 61   |
| LmjF11.0310 | <i>L. major</i> | 80  | 102  | 181  |
| LmjF11.0310 | <i>L. major</i> | 242 | 376  | 617  |
| LmjF11.0310 | <i>L. major</i> | 63  | 646  | 708  |
| LmjF11.0310 | <i>L. major</i> | 86  | 726  | 811  |
| LmjF11.0310 | <i>L. major</i> | 50  | 965  | 1014 |
| LmjF11.0310 | <i>L. major</i> | 48  | 1244 | 1291 |
| LmjF11.0310 | <i>L. major</i> | 118 | 1339 | 1456 |
| LmjF11.0310 | <i>L. major</i> | 41  | 1499 | 1539 |
| LmjF11.0310 | <i>L. major</i> | 49  | 1759 | 1807 |
| LmjF11.0320 | <i>L. major</i> | 62  | 1    | 62   |
| LmjF11.0320 | <i>L. major</i> | 148 | 173  | 320  |
| LmjF11.0320 | <i>L. major</i> | 46  | 422  | 467  |
| LmjF11.0320 | <i>L. major</i> | 90  | 655  | 744  |
| LmjF11.0320 | <i>L. major</i> | 40  | 819  | 858  |
| LmjF11.0320 | <i>L. major</i> | 77  | 1147 | 1223 |
| LmjF11.0330 | <i>L. major</i> | 66  | 1    | 66   |
| LmjF11.0330 | <i>L. major</i> | 45  | 166  | 210  |
| LmjF11.0330 | <i>L. major</i> | 54  | 414  | 467  |
| LmjF11.0330 | <i>L. major</i> | 91  | 784  | 874  |
| LmjF11.0330 | <i>L. major</i> | 102 | 893  | 994  |

|             |                 |     |      |      |
|-------------|-----------------|-----|------|------|
| LmjF11.0340 | <i>L. major</i> | 44  | 1    | 44   |
| LmjF11.0340 | <i>L. major</i> | 89  | 64   | 152  |
| LmjF11.0340 | <i>L. major</i> | 109 | 343  | 451  |
| LmjF11.0350 | <i>L. major</i> | 49  | 205  | 253  |
| LmjF11.0360 | <i>L. major</i> | 112 | 60   | 171  |
| LmjF11.0360 | <i>L. major</i> | 123 | 245  | 367  |
| LmjF11.0370 | <i>L. major</i> | 137 | 1    | 137  |
| LmjF11.0370 | <i>L. major</i> | 418 | 151  | 568  |
| LmjF11.0380 | <i>L. major</i> | 172 | 1    | 172  |
| LmjF11.0380 | <i>L. major</i> | 44  | 435  | 478  |
| LmjF11.0380 | <i>L. major</i> | 62  | 515  | 576  |
| LmjF11.0380 | <i>L. major</i> | 60  | 592  | 651  |
| LmjF11.0380 | <i>L. major</i> | 62  | 841  | 902  |
| LmjF11.0390 | <i>L. major</i> | 94  | 70   | 163  |
| LmjF11.0390 | <i>L. major</i> | 44  | 246  | 289  |
| LmjF11.0390 | <i>L. major</i> | 79  | 402  | 480  |
| LmjF11.0400 | <i>L. major</i> | 109 | 1    | 109  |
| LmjF11.0400 | <i>L. major</i> | 74  | 127  | 200  |
| LmjF11.0400 | <i>L. major</i> | 66  | 554  | 619  |
| LmjF11.0400 | <i>L. major</i> | 426 | 668  | 1093 |
| LmjF11.0410 | <i>L. major</i> | 153 | 1    | 153  |
| LmjF11.0410 | <i>L. major</i> | 113 | 249  | 361  |
| LmjF11.0410 | <i>L. major</i> | 42  | 541  | 582  |
| LmjF11.0420 | <i>L. major</i> | 41  | 528  | 568  |
| LmjF11.0430 | <i>L. major</i> | 96  | 25   | 120  |
| LmjF11.0430 | <i>L. major</i> | 59  | 398  | 456  |
| LmjF11.0430 | <i>L. major</i> | 46  | 599  | 644  |
| LmjF11.0440 | <i>L. major</i> | 405 | 182  | 586  |
| LmjF11.0450 | <i>L. major</i> | 43  | 149  | 191  |
| LmjF11.0450 | <i>L. major</i> | 41  | 230  | 270  |
| LmjF11.0450 | <i>L. major</i> | 51  | 324  | 374  |
| LmjF11.0450 | <i>L. major</i> | 52  | 434  | 485  |
| LmjF11.0450 | <i>L. major</i> | 70  | 556  | 625  |
| LmjF11.0450 | <i>L. major</i> | 46  | 662  | 707  |
| LmjF11.0460 | <i>L. major</i> | 45  | 1    | 45   |
| LmjF11.0460 | <i>L. major</i> | 56  | 79   | 134  |
| LmjF11.0460 | <i>L. major</i> | 40  | 165  | 204  |
| LmjF11.0460 | <i>L. major</i> | 42  | 314  | 355  |
| LmjF11.0470 | <i>L. major</i> | 50  | 1    | 50   |
| LmjF11.0470 | <i>L. major</i> | 102 | 86   | 187  |
| LmjF11.0470 | <i>L. major</i> | 47  | 294  | 340  |
| LmjF11.0480 | <i>L. major</i> | 40  | 1021 | 1060 |
| LmjF11.0490 | <i>L. major</i> | 57  | 1    | 57   |
| LmjF11.0490 | <i>L. major</i> | 91  | 220  | 310  |
| LmjF11.0510 | <i>L. major</i> | 114 | 56   | 169  |
| LmjF11.0510 | <i>L. major</i> | 43  | 477  | 519  |
| LmjF11.0530 | <i>L. major</i> | 99  | 28   | 126  |

|             |                 |     |      |      |
|-------------|-----------------|-----|------|------|
| LmjF11.0530 | <i>L. major</i> | 46  | 273  | 318  |
| LmjF11.0530 | <i>L. major</i> | 43  | 457  | 499  |
| LmjF11.0540 | <i>L. major</i> | 51  | 111  | 161  |
| LmjF11.0540 | <i>L. major</i> | 70  | 324  | 393  |
| LmjF11.0540 | <i>L. major</i> | 70  | 324  | 393  |
| LmjF11.0550 | <i>L. major</i> | 67  | 309  | 375  |
| LmjF11.0560 | <i>L. major</i> | 113 | 1    | 113  |
| LmjF11.0560 | <i>L. major</i> | 41  | 144  | 184  |
| LmjF11.0560 | <i>L. major</i> | 45  | 268  | 312  |
| LmjF11.0560 | <i>L. major</i> | 74  | 719  | 792  |
| LmjF11.0560 | <i>L. major</i> | 52  | 875  | 926  |
| LmjF11.0560 | <i>L. major</i> | 145 | 938  | 1082 |
| LmjF11.0580 | <i>L. major</i> | 56  | 60   | 115  |
| LmjF11.0600 | <i>L. major</i> | 226 | 61   | 286  |
| LmjF11.0600 | <i>L. major</i> | 210 | 390  | 599  |
| LmjF11.0610 | <i>L. major</i> | 210 | 1    | 210  |
| LmjF11.0610 | <i>L. major</i> | 486 | 242  | 727  |
| LmjF11.0610 | <i>L. major</i> | 62  | 755  | 816  |
| LmjF11.0610 | <i>L. major</i> | 111 | 966  | 1076 |
| LmjF11.0640 | <i>L. major</i> | 85  | 1    | 85   |
| LmjF11.0640 | <i>L. major</i> | 173 | 181  | 353  |
| LmjF11.0640 | <i>L. major</i> | 68  | 384  | 451  |
| LmjF11.0640 | <i>L. major</i> | 57  | 489  | 545  |
| LmjF11.0640 | <i>L. major</i> | 56  | 586  | 641  |
| LmjF11.0640 | <i>L. major</i> | 110 | 737  | 846  |
| LmjF11.0640 | <i>L. major</i> | 48  | 889  | 936  |
| LmjF11.0640 | <i>L. major</i> | 57  | 1101 | 1157 |
| LmjF11.0640 | <i>L. major</i> | 305 | 1198 | 1502 |
| LmjF11.0640 | <i>L. major</i> | 41  | 1536 | 1576 |
| LmjF11.0650 | <i>L. major</i> | 56  | 309  | 364  |
| LmjF11.0660 | <i>L. major</i> | 65  | 312  | 376  |
| LmjF11.0660 | <i>L. major</i> | 43  | 611  | 653  |
| LmjF11.0680 | <i>L. major</i> | 47  | 491  | 537  |
| LmjF11.0700 | <i>L. major</i> | 91  | 43   | 133  |
| LmjF11.0700 | <i>L. major</i> | 49  | 220  | 268  |
| LmjF11.0700 | <i>L. major</i> | 49  | 220  | 268  |
| LmjF11.0710 | <i>L. major</i> | 192 | 21   | 212  |
| LmjF11.0710 | <i>L. major</i> | 44  | 253  | 296  |
| LmjF11.0710 | <i>L. major</i> | 133 | 338  | 470  |
| LmjF11.0720 | <i>L. major</i> | 59  | 253  | 311  |
| LmjF11.0720 | <i>L. major</i> | 112 | 348  | 459  |
| LmjF11.0720 | <i>L. major</i> | 140 | 514  | 653  |
| LmjF11.0730 | <i>L. major</i> | 86  | 1    | 86   |
| LmjF11.0730 | <i>L. major</i> | 99  | 202  | 300  |
| LmjF11.0730 | <i>L. major</i> | 85  | 408  | 492  |
| LmjF11.0730 | <i>L. major</i> | 148 | 603  | 750  |
| LmjF11.0730 | <i>L. major</i> | 276 | 756  | 1031 |

|             |                 |     |      |      |
|-------------|-----------------|-----|------|------|
| LmjF11.0730 | <i>L. major</i> | 55  | 1067 | 1121 |
| LmjF11.0740 | <i>L. major</i> | 59  | 1    | 59   |
| LmjF11.0740 | <i>L. major</i> | 50  | 271  | 320  |
| LmjF11.0740 | <i>L. major</i> | 87  | 358  | 444  |
| LmjF11.0750 | <i>L. major</i> | 118 | 88   | 205  |
| LmjF11.0760 | <i>L. major</i> | 96  | 69   | 164  |
| LmjF11.0780 | <i>L. major</i> | 96  | 69   | 164  |
| LmjF11.0790 | <i>L. major</i> | 49  | 122  | 170  |
| LmjF11.0810 | <i>L. major</i> | 83  | 77   | 159  |
| LmjF11.0810 | <i>L. major</i> | 51  | 478  | 528  |
| LmjF11.0810 | <i>L. major</i> | 51  | 478  | 528  |
| LmjF11.0820 | <i>L. major</i> | 270 | 69   | 338  |
| LmjF11.0830 | <i>L. major</i> | 98  | 1    | 98   |
| LmjF11.0830 | <i>L. major</i> | 220 | 112  | 331  |
| LmjF11.0830 | <i>L. major</i> | 102 | 352  | 453  |
| LmjF11.0830 | <i>L. major</i> | 228 | 781  | 1008 |
| LmjF11.0830 | <i>L. major</i> | 393 | 1017 | 1409 |
| LmjF11.0860 | <i>L. major</i> | 127 | 1    | 127  |
| LmjF11.0860 | <i>L. major</i> | 47  | 246  | 292  |
| LmjF11.0860 | <i>L. major</i> | 62  | 320  | 381  |
| LmjF11.0860 | <i>L. major</i> | 40  | 543  | 582  |
| LmjF11.0860 | <i>L. major</i> | 94  | 644  | 737  |
| LmjF11.0860 | <i>L. major</i> | 51  | 1017 | 1067 |
| LmjF11.0860 | <i>L. major</i> | 72  | 1177 | 1248 |
| LmjF11.0860 | <i>L. major</i> | 135 | 1532 | 1666 |
| LmjF11.0870 | <i>L. major</i> | 53  | 126  | 178  |
| LmjF11.0870 | <i>L. major</i> | 59  | 232  | 290  |
| LmjF11.0870 | <i>L. major</i> | 242 | 394  | 635  |
| LmjF11.0870 | <i>L. major</i> | 63  | 668  | 730  |
| LmjF11.0870 | <i>L. major</i> | 530 | 812  | 1341 |
| LmjF11.0870 | <i>L. major</i> | 61  | 1357 | 1417 |
| LmjF11.0880 | <i>L. major</i> | 44  | 1    | 44   |
| LmjF11.0890 | <i>L. major</i> | 92  | 1    | 92   |
| LmjF11.0890 | <i>L. major</i> | 73  | 441  | 513  |
| LmjF11.0900 | <i>L. major</i> | 103 | 88   | 190  |
| LmjF11.0910 | <i>L. major</i> | 347 | 1    | 347  |
| LmjF11.0910 | <i>L. major</i> | 66  | 766  | 831  |
| LmjF11.0910 | <i>L. major</i> | 66  | 917  | 982  |
| LmjF11.0910 | <i>L. major</i> | 53  | 1019 | 1071 |
| LmjF11.0910 | <i>L. major</i> | 50  | 1117 | 1166 |
| LmjF11.0910 | <i>L. major</i> | 164 | 1302 | 1465 |
| LmjF11.0920 | <i>L. major</i> | 124 | 50   | 173  |
| LmjF11.0920 | <i>L. major</i> | 59  | 300  | 358  |
| LmjF11.0920 | <i>L. major</i> | 167 | 454  | 620  |
| LmjF11.0930 | <i>L. major</i> | 179 | 87   | 265  |
| LmjF11.0930 | <i>L. major</i> | 108 | 270  | 377  |
| LmjF11.0940 | <i>L. major</i> | 43  | 27   | 69   |

|             |                 |     |      |      |
|-------------|-----------------|-----|------|------|
| LmjF11.0940 | <i>L. major</i> | 51  | 129  | 179  |
| LmjF11.0940 | <i>L. major</i> | 76  | 212  | 287  |
| LmjF11.0940 | <i>L. major</i> | 618 | 293  | 910  |
| LmjF11.0940 | <i>L. major</i> | 124 | 920  | 1043 |
| LmjF11.0940 | <i>L. major</i> | 139 | 1045 | 1183 |
| LmjF11.0940 | <i>L. major</i> | 75  | 1196 | 1270 |
| LmjF11.0940 | <i>L. major</i> | 144 | 1306 | 1449 |
| LmjF11.0950 | <i>L. major</i> | 46  | 1    | 46   |
| LmjF11.0950 | <i>L. major</i> | 47  | 95   | 141  |
| LmjF11.0950 | <i>L. major</i> | 62  | 183  | 244  |
| LmjF11.0950 | <i>L. major</i> | 149 | 265  | 413  |
| LmjF11.0980 | <i>L. major</i> | 68  | 36   | 103  |
| LmjF11.0980 | <i>L. major</i> | 149 | 106  | 254  |
| LmjF11.0980 | <i>L. major</i> | 71  | 357  | 427  |
| LmjF11.0990 | <i>L. major</i> | 82  | 682  | 763  |
| LmjF11.1010 | <i>L. major</i> | 44  | 45   | 88   |
| LmjF11.1010 | <i>L. major</i> | 47  | 130  | 176  |
| LmjF11.1010 | <i>L. major</i> | 69  | 227  | 295  |
| LmjF11.1010 | <i>L. major</i> | 72  | 518  | 589  |
| LmjF11.1020 | <i>L. major</i> | 213 | 1    | 213  |
| LmjF11.1020 | <i>L. major</i> | 53  | 449  | 501  |
| LmjF11.1020 | <i>L. major</i> | 187 | 690  | 876  |
| LmjF11.1020 | <i>L. major</i> | 132 | 907  | 1038 |
| LmjF11.1030 | <i>L. major</i> | 45  | 1    | 45   |
| LmjF11.1030 | <i>L. major</i> | 41  | 109  | 149  |
| LmjF11.1030 | <i>L. major</i> | 41  | 109  | 149  |
| LmjF11.1040 | <i>L. major</i> | 113 | 1    | 113  |
| LmjF11.1040 | <i>L. major</i> | 40  | 121  | 160  |
| LmjF11.1040 | <i>L. major</i> | 56  | 240  | 295  |
| LmjF11.1040 | <i>L. major</i> | 256 | 313  | 568  |
| LmjF11.1040 | <i>L. major</i> | 158 | 576  | 733  |
| LmjF11.1070 | <i>L. major</i> | 202 | 1    | 202  |
| LmjF11.1080 | <i>L. major</i> | 90  | 1    | 90   |
| LmjF11.1080 | <i>L. major</i> | 63  | 126  | 188  |
| LmjF11.1080 | <i>L. major</i> | 67  | 227  | 293  |
| LmjF11.1090 | <i>L. major</i> | 75  | 1    | 75   |
| LmjF11.1110 | <i>L. major</i> | 81  | 67   | 147  |
| LmjF11.1120 | <i>L. major</i> | 76  | 69   | 144  |
| LmjF11.1120 | <i>L. major</i> | 65  | 193  | 257  |
| LmjF11.1120 | <i>L. major</i> | 65  | 193  | 257  |
| LmjF11.1130 | <i>L. major</i> | 81  | 67   | 147  |
| LmjF11.1160 | <i>L. major</i> | 367 | 717  | 1083 |
| LmjF11.1170 | <i>L. major</i> | 334 | 1    | 334  |
| LmjF11.1200 | <i>L. major</i> | 46  | 357  | 402  |
| LmjF11.1200 | <i>L. major</i> | 56  | 637  | 692  |
| LmjF11.1220 | <i>L. major</i> | 56  | 1721 | 1776 |
| LmjF11.1240 | <i>L. major</i> | 98  | 1    | 98   |

|             |                 |     |      |      |
|-------------|-----------------|-----|------|------|
| LmjF11.1250 | <i>L. major</i> | 56  | 1721 | 1776 |
| LmjF11.1290 | <i>L. major</i> | 126 | 1734 | 1859 |
| LmjF11.1300 | <i>L. major</i> | 113 | 1    | 113  |
| LmjF11.1310 | <i>L. major</i> | 51  | 107  | 157  |
| LmjF11.1330 | <i>L. major</i> | 110 | 69   | 178  |
| LmjF11.1330 | <i>L. major</i> | 85  | 201  | 285  |
| LmjF11.1330 | <i>L. major</i> | 57  | 363  | 419  |
| LmjF11.1330 | <i>L. major</i> | 84  | 462  | 545  |
| LmjF11.1330 | <i>L. major</i> | 110 | 622  | 731  |
| LmjF11.1330 | <i>L. major</i> | 65  | 855  | 919  |
| LmjF11.1330 | <i>L. major</i> | 49  | 1449 | 1497 |
| LmjF11.1330 | <i>L. major</i> | 88  | 1527 | 1614 |
| LmjF11.1340 | <i>L. major</i> | 103 | 304  | 406  |
| LmjF11.1350 | <i>L. major</i> | 40  | 1    | 40   |
| LmjF11.1350 | <i>L. major</i> | 92  | 79   | 170  |
| LmjF11.1350 | <i>L. major</i> | 92  | 79   | 170  |
| LmjF11.1360 | <i>L. major</i> | 71  | 1    | 71   |
| LmjF11.1380 | <i>L. major</i> | 91  | 105  | 195  |
| LmjF11.1380 | <i>L. major</i> | 46  | 214  | 259  |
| LmjF11.1380 | <i>L. major</i> | 85  | 302  | 386  |
| LmjF12.0060 | <i>L. major</i> | 42  | 151  | 192  |
| LmjF12.0070 | <i>L. major</i> | 54  | 63   | 116  |
| LmjF12.0070 | <i>L. major</i> | 430 | 150  | 579  |
| LmjF12.0100 | <i>L. major</i> | 64  | 118  | 181  |
| LmjF12.0110 | <i>L. major</i> | 156 | 1    | 156  |
| LmjF12.0110 | <i>L. major</i> | 446 | 188  | 633  |
| LmjF12.0110 | <i>L. major</i> | 67  | 706  | 772  |
| LmjF12.0120 | <i>L. major</i> | 243 | 43   | 285  |
| LmjF12.0120 | <i>L. major</i> | 262 | 317  | 578  |
| LmjF12.0120 | <i>L. major</i> | 691 | 608  | 1298 |
| LmjF12.0130 | <i>L. major</i> | 101 | 255  | 355  |
| LmjF12.0130 | <i>L. major</i> | 63  | 469  | 531  |
| LmjF12.0140 | <i>L. major</i> | 147 | 214  | 360  |
| LmjF12.0150 | <i>L. major</i> | 186 | 188  | 373  |
| LmjF12.0150 | <i>L. major</i> | 62  | 401  | 462  |
| LmjF12.0150 | <i>L. major</i> | 50  | 546  | 595  |
| LmjF12.0150 | <i>L. major</i> | 58  | 651  | 708  |
| LmjF12.0150 | <i>L. major</i> | 155 | 871  | 1025 |
| LmjF12.0160 | <i>L. major</i> | 54  | 168  | 221  |
| LmjF12.0160 | <i>L. major</i> | 68  | 355  | 422  |
| LmjF12.0160 | <i>L. major</i> | 48  | 483  | 530  |
| LmjF12.0160 | <i>L. major</i> | 62  | 660  | 721  |
| LmjF12.0170 | <i>L. major</i> | 62  | 1    | 62   |
| LmjF12.0170 | <i>L. major</i> | 125 | 82   | 206  |
| LmjF12.0170 | <i>L. major</i> | 96  | 231  | 326  |
| LmjF12.0180 | <i>L. major</i> | 136 | 120  | 255  |
| LmjF12.0180 | <i>L. major</i> | 150 | 364  | 513  |

|             |                 |     |      |      |
|-------------|-----------------|-----|------|------|
| LmjF12.0180 | <i>L. major</i> | 150 | 364  | 513  |
| LmjF12.0190 | <i>L. major</i> | 99  | 86   | 184  |
| LmjF12.0190 | <i>L. major</i> | 56  | 205  | 260  |
| LmjF12.0190 | <i>L. major</i> | 83  | 340  | 422  |
| LmjF12.0190 | <i>L. major</i> | 84  | 587  | 670  |
| LmjF12.0190 | <i>L. major</i> | 124 | 844  | 967  |
| LmjF12.0190 | <i>L. major</i> | 68  | 1009 | 1076 |
| LmjF12.0190 | <i>L. major</i> | 54  | 1137 | 1190 |
| LmjF12.0190 | <i>L. major</i> | 43  | 1290 | 1332 |
| LmjF12.0190 | <i>L. major</i> | 158 | 1466 | 1623 |
| LmjF12.0200 | <i>L. major</i> | 82  | 1    | 82   |
| LmjF12.0200 | <i>L. major</i> | 333 | 98   | 430  |
| LmjF12.0200 | <i>L. major</i> | 373 | 481  | 853  |
| LmjF12.0200 | <i>L. major</i> | 217 | 861  | 1077 |
| LmjF12.0210 | <i>L. major</i> | 50  | 1    | 50   |
| LmjF12.0230 | <i>L. major</i> | 90  | 1    | 90   |
| LmjF12.0230 | <i>L. major</i> | 60  | 138  | 197  |
| LmjF12.0230 | <i>L. major</i> | 122 | 325  | 446  |
| LmjF12.0230 | <i>L. major</i> | 75  | 515  | 589  |
| LmjF12.0230 | <i>L. major</i> | 46  | 646  | 691  |
| LmjF12.0230 | <i>L. major</i> | 118 | 944  | 1061 |
| LmjF12.0240 | <i>L. major</i> | 126 | 579  | 704  |
| LmjF12.0250 | <i>L. major</i> | 49  | 145  | 193  |
| LmjF12.0250 | <i>L. major</i> | 57  | 303  | 359  |
| LmjF12.0250 | <i>L. major</i> | 141 | 644  | 784  |
| LmjF12.0260 | <i>L. major</i> | 42  | 344  | 385  |
| LmjF12.0260 | <i>L. major</i> | 57  | 462  | 518  |
| LmjF12.0260 | <i>L. major</i> | 63  | 559  | 621  |
| LmjF12.0260 | <i>L. major</i> | 56  | 740  | 795  |
| LmjF12.0260 | <i>L. major</i> | 70  | 849  | 918  |
| LmjF12.0260 | <i>L. major</i> | 59  | 939  | 997  |
| LmjF12.0260 | <i>L. major</i> | 45  | 1125 | 1169 |
| LmjF12.0260 | <i>L. major</i> | 41  | 1419 | 1459 |
| LmjF12.0260 | <i>L. major</i> | 331 | 1597 | 1927 |
| LmjF12.0260 | <i>L. major</i> | 96  | 2091 | 2186 |
| LmjF12.0260 | <i>L. major</i> | 50  | 2285 | 2334 |
| LmjF12.0260 | <i>L. major</i> | 63  | 2430 | 2492 |
| LmjF12.0260 | <i>L. major</i> | 82  | 2520 | 2601 |
| LmjF12.0270 | <i>L. major</i> | 56  | 1    | 56   |
| LmjF12.0270 | <i>L. major</i> | 77  | 117  | 193  |
| LmjF12.0270 | <i>L. major</i> | 60  | 289  | 348  |
| LmjF12.0280 | <i>L. major</i> | 92  | 33   | 124  |
| LmjF12.0290 | <i>L. major</i> | 57  | 1    | 57   |
| LmjF12.0290 | <i>L. major</i> | 353 | 80   | 432  |
| LmjF12.0290 | <i>L. major</i> | 668 | 440  | 1107 |
| LmjF12.0290 | <i>L. major</i> | 55  | 1143 | 1197 |
| LmjF12.0290 | <i>L. major</i> | 197 | 1354 | 1550 |

|             |                 |     |      |      |
|-------------|-----------------|-----|------|------|
| LmjF12.0300 | <i>L. major</i> | 126 | 531  | 656  |
| LmjF12.0300 | <i>L. major</i> | 115 | 679  | 793  |
| LmjF12.0300 | <i>L. major</i> | 385 | 795  | 1179 |
| LmjF12.0300 | <i>L. major</i> | 68  | 1227 | 1294 |
| LmjF12.0300 | <i>L. major</i> | 87  | 1324 | 1410 |
| LmjF12.0300 | <i>L. major</i> | 77  | 1564 | 1640 |
| LmjF12.0310 | <i>L. major</i> | 153 | 84   | 236  |
| LmjF12.0310 | <i>L. major</i> | 86  | 424  | 509  |
| LmjF12.0310 | <i>L. major</i> | 60  | 585  | 644  |
| LmjF12.0320 | <i>L. major</i> | 172 | 112  | 283  |
| LmjF12.0320 | <i>L. major</i> | 54  | 318  | 371  |
| LmjF12.0320 | <i>L. major</i> | 61  | 460  | 520  |
| LmjF12.0320 | <i>L. major</i> | 98  | 543  | 640  |
| LmjF12.0320 | <i>L. major</i> | 54  | 739  | 792  |
| LmjF12.0320 | <i>L. major</i> | 497 | 807  | 1303 |
| LmjF12.0320 | <i>L. major</i> | 59  | 1342 | 1400 |
| LmjF12.0320 | <i>L. major</i> | 89  | 1420 | 1508 |
| LmjF12.0320 | <i>L. major</i> | 85  | 1531 | 1615 |
| LmjF12.0320 | <i>L. major</i> | 88  | 1654 | 1741 |
| LmjF12.0320 | <i>L. major</i> | 49  | 1856 | 1904 |
| LmjF12.0320 | <i>L. major</i> | 96  | 2143 | 2238 |
| LmjF12.0320 | <i>L. major</i> | 42  | 2325 | 2366 |
| LmjF12.0320 | <i>L. major</i> | 199 | 2443 | 2641 |
| LmjF12.0320 | <i>L. major</i> | 210 | 2718 | 2927 |
| LmjF12.0320 | <i>L. major</i> | 74  | 2938 | 3011 |
| LmjF12.0320 | <i>L. major</i> | 168 | 3079 | 3246 |
| LmjF12.0330 | <i>L. major</i> | 65  | 223  | 287  |
| LmjF12.0330 | <i>L. major</i> | 40  | 328  | 367  |
| LmjF12.0330 | <i>L. major</i> | 44  | 438  | 481  |
| LmjF12.0330 | <i>L. major</i> | 213 | 514  | 726  |
| LmjF12.0330 | <i>L. major</i> | 45  | 754  | 798  |
| LmjF12.0340 | <i>L. major</i> | 454 | 123  | 576  |
| LmjF12.0340 | <i>L. major</i> | 163 | 607  | 769  |
| LmjF12.0340 | <i>L. major</i> | 582 | 793  | 1374 |
| LmjF12.0340 | <i>L. major</i> | 109 | 1427 | 1535 |
| LmjF12.0340 | <i>L. major</i> | 47  | 1563 | 1609 |
| LmjF12.0340 | <i>L. major</i> | 48  | 1692 | 1739 |
| LmjF12.0340 | <i>L. major</i> | 269 | 1775 | 2043 |
| LmjF12.0340 | <i>L. major</i> | 123 | 2081 | 2203 |
| LmjF12.0350 | <i>L. major</i> | 342 | 1    | 342  |
| LmjF12.0350 | <i>L. major</i> | 60  | 503  | 562  |
| LmjF12.0360 | <i>L. major</i> | 100 | 199  | 298  |
| LmjF12.0370 | <i>L. major</i> | 43  | 153  | 195  |
| LmjF12.0370 | <i>L. major</i> | 79  | 211  | 289  |
| LmjF12.0370 | <i>L. major</i> | 79  | 211  | 289  |
| LmjF12.0380 | <i>L. major</i> | 116 | 1    | 116  |
| LmjF12.0380 | <i>L. major</i> | 107 | 191  | 297  |



|             |                 |     |      |      |
|-------------|-----------------|-----|------|------|
| LmjF12.0380 | <i>L. major</i> | 101 | 318  | 418  |
| LmjF12.0380 | <i>L. major</i> | 160 | 430  | 589  |
| LmjF12.0380 | <i>L. major</i> | 384 | 592  | 975  |
| LmjF12.0380 | <i>L. major</i> | 54  | 1011 | 1064 |
| LmjF12.0390 | <i>L. major</i> | 47  | 331  | 377  |
| LmjF12.0405 | <i>L. major</i> | 144 | 1    | 144  |
| LmjF12.0405 | <i>L. major</i> | 159 | 172  | 330  |
| LmjF12.0410 | <i>L. major</i> | 50  | 135  | 184  |
| LmjF12.0430 | <i>L. major</i> | 55  | 42   | 96   |
| LmjF12.0430 | <i>L. major</i> | 164 | 194  | 357  |
| LmjF12.0430 | <i>L. major</i> | 56  | 367  | 422  |
| LmjF12.0430 | <i>L. major</i> | 105 | 508  | 612  |
| LmjF12.0440 | <i>L. major</i> | 79  | 27   | 105  |
| LmjF12.0440 | <i>L. major</i> | 108 | 238  | 345  |
| LmjF12.0440 | <i>L. major</i> | 60  | 368  | 427  |
| LmjF12.0440 | <i>L. major</i> | 86  | 438  | 523  |
| LmjF12.0440 | <i>L. major</i> | 152 | 559  | 710  |
| LmjF12.0450 | <i>L. major</i> | 163 | 1    | 163  |
| LmjF12.0450 | <i>L. major</i> | 173 | 194  | 366  |
| LmjF12.0450 | <i>L. major</i> | 46  | 377  | 422  |
| LmjF12.0450 | <i>L. major</i> | 128 | 433  | 560  |
| LmjF12.0450 | <i>L. major</i> | 427 | 665  | 1091 |
| LmjF12.0460 | <i>L. major</i> | 511 | 1    | 511  |
| LmjF12.0460 | <i>L. major</i> | 116 | 670  | 785  |
| LmjF12.0470 | <i>L. major</i> | 411 | 1    | 411  |
| LmjF12.0470 | <i>L. major</i> | 79  | 441  | 519  |
| LmjF12.0470 | <i>L. major</i> | 61  | 542  | 602  |
| LmjF12.0470 | <i>L. major</i> | 45  | 691  | 735  |
| LmjF12.0480 | <i>L. major</i> | 48  | 1    | 48   |
| LmjF12.0480 | <i>L. major</i> | 174 | 65   | 238  |
| LmjF12.0480 | <i>L. major</i> | 79  | 242  | 320  |
| LmjF12.0480 | <i>L. major</i> | 41  | 386  | 426  |
| LmjF12.0480 | <i>L. major</i> | 153 | 449  | 601  |
| LmjF12.0490 | <i>L. major</i> | 149 | 47   | 195  |
| LmjF12.0490 | <i>L. major</i> | 88  | 199  | 286  |
| LmjF12.0490 | <i>L. major</i> | 88  | 199  | 286  |
| LmjF12.0500 | <i>L. major</i> | 55  | 1    | 55   |
| LmjF12.0500 | <i>L. major</i> | 181 | 99   | 279  |
| LmjF12.0500 | <i>L. major</i> | 56  | 320  | 375  |
| LmjF12.0500 | <i>L. major</i> | 113 | 402  | 514  |
| LmjF12.0500 | <i>L. major</i> | 90  | 521  | 610  |
| LmjF12.0500 | <i>L. major</i> | 255 | 625  | 879  |
| LmjF12.0500 | <i>L. major</i> | 68  | 881  | 948  |
| LmjF12.0500 | <i>L. major</i> | 63  | 974  | 1036 |
| LmjF12.0510 | <i>L. major</i> | 565 | 62   | 626  |
| LmjF12.0510 | <i>L. major</i> | 143 | 633  | 775  |
| LmjF12.0510 | <i>L. major</i> | 53  | 778  | 830  |

|             |                 |     |      |      |
|-------------|-----------------|-----|------|------|
| LmjF12.0510 | <i>L. major</i> | 77  | 894  | 970  |
| LmjF12.0540 | <i>L. major</i> | 76  | 1    | 76   |
| LmjF12.0550 | <i>L. major</i> | 100 | 48   | 147  |
| LmjF12.0550 | <i>L. major</i> | 225 | 182  | 406  |
| LmjF12.0550 | <i>L. major</i> | 87  | 413  | 499  |
| LmjF12.0560 | <i>L. major</i> | 62  | 1    | 62   |
| LmjF12.0560 | <i>L. major</i> | 123 | 219  | 341  |
| LmjF12.0560 | <i>L. major</i> | 46  | 496  | 541  |
| LmjF12.0560 | <i>L. major</i> | 293 | 624  | 916  |
| LmjF12.0560 | <i>L. major</i> | 126 | 921  | 1046 |
| LmjF12.0570 | <i>L. major</i> | 93  | 105  | 197  |
| LmjF12.0570 | <i>L. major</i> | 104 | 224  | 327  |
| LmjF12.0570 | <i>L. major</i> | 162 | 1094 | 1255 |
| LmjF12.0570 | <i>L. major</i> | 348 | 1276 | 1623 |
| LmjF12.0570 | <i>L. major</i> | 189 | 1628 | 1816 |
| LmjF12.0590 | <i>L. major</i> | 220 | 1    | 220  |
| LmjF12.0590 | <i>L. major</i> | 45  | 855  | 899  |
| LmjF12.0590 | <i>L. major</i> | 119 | 1028 | 1146 |
| LmjF12.0590 | <i>L. major</i> | 42  | 1221 | 1262 |
| LmjF12.0590 | <i>L. major</i> | 358 | 1297 | 1654 |
| LmjF12.0590 | <i>L. major</i> | 90  | 1688 | 1777 |
| LmjF12.0600 | <i>L. major</i> | 46  | 1    | 46   |
| LmjF12.0600 | <i>L. major</i> | 47  | 181  | 227  |
| LmjF12.0600 | <i>L. major</i> | 61  | 252  | 312  |
| LmjF12.0610 | <i>L. major</i> | 178 | 179  | 356  |
| LmjF12.0610 | <i>L. major</i> | 63  | 450  | 512  |
| LmjF12.0610 | <i>L. major</i> | 137 | 812  | 948  |
| LmjF12.0610 | <i>L. major</i> | 60  | 966  | 1025 |
| LmjF12.0620 | <i>L. major</i> | 936 | 43   | 978  |
| LmjF12.0620 | <i>L. major</i> | 321 | 996  | 1316 |
| LmjF12.0640 | <i>L. major</i> | 86  | 175  | 260  |
| LmjF12.0640 | <i>L. major</i> | 53  | 307  | 359  |
| LmjF12.0640 | <i>L. major</i> | 53  | 307  | 359  |
| LmjF12.0650 | <i>L. major</i> | 65  | 16   | 80   |
| LmjF12.0650 | <i>L. major</i> | 455 | 187  | 641  |
| LmjF12.0650 | <i>L. major</i> | 138 | 681  | 818  |
| LmjF12.0660 | <i>L. major</i> | 63  | 1    | 63   |
| LmjF12.0680 | <i>L. major</i> | 41  | 135  | 175  |
| LmjF12.0680 | <i>L. major</i> | 62  | 328  | 389  |
| LmjF12.0690 | <i>L. major</i> | 73  | 94   | 166  |
| LmjF12.0700 | <i>L. major</i> | 47  | 123  | 169  |
| LmjF12.0700 | <i>L. major</i> | 44  | 239  | 282  |
| LmjF12.0700 | <i>L. major</i> | 67  | 398  | 464  |
| LmjF12.0700 | <i>L. major</i> | 171 | 676  | 846  |
| LmjF12.0715 | <i>L. major</i> | 91  | 219  | 309  |
| LmjF12.0715 | <i>L. major</i> | 145 | 338  | 482  |
| LmjF12.0730 | <i>L. major</i> | 66  | 192  | 257  |

|             |                 |     |     |     |
|-------------|-----------------|-----|-----|-----|
| LmjF12.0730 | <i>L. major</i> | 63  | 290 | 352 |
| LmjF12.0730 | <i>L. major</i> | 76  | 429 | 504 |
| LmjF12.0740 | <i>L. major</i> | 162 | 237 | 398 |
| LmjF12.0740 | <i>L. major</i> | 63  | 429 | 491 |
| LmjF12.0740 | <i>L. major</i> | 195 | 523 | 717 |
| LmjF12.0755 | <i>L. major</i> | 125 | 403 | 527 |
| LmjF12.0760 | <i>L. major</i> | 113 | 140 | 252 |
| LmjF12.0760 | <i>L. major</i> | 119 | 289 | 407 |
| LmjF12.0760 | <i>L. major</i> | 119 | 426 | 544 |
| LmjF12.0765 | <i>L. major</i> | 200 | 330 | 529 |
| LmjF12.0770 | <i>L. major</i> | 91  | 219 | 309 |
| LmjF12.0770 | <i>L. major</i> | 145 | 338 | 482 |
| LmjF12.0780 | <i>L. major</i> | 86  | 120 | 205 |
| LmjF12.0780 | <i>L. major</i> | 97  | 236 | 332 |
| LmjF12.0800 | <i>L. major</i> | 91  | 219 | 309 |
| LmjF12.0800 | <i>L. major</i> | 142 | 336 | 477 |
| LmjF12.0810 | <i>L. major</i> | 87  | 119 | 205 |
| LmjF12.0810 | <i>L. major</i> | 107 | 236 | 342 |
| LmjF12.0820 | <i>L. major</i> | 91  | 219 | 309 |
| LmjF12.0820 | <i>L. major</i> | 147 | 336 | 482 |
| LmjF12.0830 | <i>L. major</i> | 52  | 279 | 330 |
| LmjF12.0830 | <i>L. major</i> | 40  | 357 | 396 |
| LmjF12.0830 | <i>L. major</i> | 178 | 426 | 603 |
| LmjF12.0840 | <i>L. major</i> | 96  | 219 | 314 |
| LmjF12.0850 | <i>L. major</i> | 60  | 363 | 422 |
| LmjF12.0850 | <i>L. major</i> | 129 | 452 | 580 |
| LmjF12.0860 | <i>L. major</i> | 472 | 235 | 706 |
| LmjF12.0870 | <i>L. major</i> | 175 | 330 | 504 |
| LmjF12.0880 | <i>L. major</i> | 147 | 1   | 147 |
| LmjF12.0880 | <i>L. major</i> | 71  | 286 | 356 |
| LmjF12.0880 | <i>L. major</i> | 71  | 286 | 356 |
| LmjF12.0885 | <i>L. major</i> | 147 | 1   | 147 |
| LmjF12.0885 | <i>L. major</i> | 71  | 286 | 356 |
| LmjF12.0885 | <i>L. major</i> | 71  | 286 | 356 |
| LmjF12.0890 | <i>L. major</i> | 63  | 119 | 181 |
| LmjF12.0890 | <i>L. major</i> | 45  | 307 | 351 |
| LmjF12.0890 | <i>L. major</i> | 45  | 307 | 351 |
| LmjF12.0895 | <i>L. major</i> | 90  | 219 | 308 |
| LmjF12.0895 | <i>L. major</i> | 147 | 336 | 482 |
| LmjF12.0905 | <i>L. major</i> | 213 | 1   | 213 |
| LmjF12.0905 | <i>L. major</i> | 41  | 391 | 431 |
| LmjF12.0905 | <i>L. major</i> | 41  | 391 | 431 |
| LmjF12.0930 | <i>L. major</i> | 91  | 219 | 309 |
| LmjF12.0930 | <i>L. major</i> | 147 | 336 | 482 |
| LmjF12.0940 | <i>L. major</i> | 86  | 120 | 205 |
| LmjF12.0940 | <i>L. major</i> | 107 | 236 | 342 |
| LmjF12.0950 | <i>L. major</i> | 91  | 219 | 309 |

|             |                 |     |      |      |
|-------------|-----------------|-----|------|------|
| LmjF12.0950 | <i>L. major</i> | 147 | 336  | 482  |
| LmjF12.0960 | <i>L. major</i> | 51  | 279  | 329  |
| LmjF12.0960 | <i>L. major</i> | 41  | 356  | 396  |
| LmjF12.0960 | <i>L. major</i> | 198 | 426  | 623  |
| LmjF12.0970 | <i>L. major</i> | 91  | 219  | 309  |
| LmjF12.0970 | <i>L. major</i> | 106 | 338  | 443  |
| LmjF12.0970 | <i>L. major</i> | 87  | 498  | 584  |
| LmjF12.0980 | <i>L. major</i> | 86  | 120  | 205  |
| LmjF12.0980 | <i>L. major</i> | 107 | 236  | 342  |
| LmjF12.0990 | <i>L. major</i> | 84  | 146  | 229  |
| LmjF12.0990 | <i>L. major</i> | 164 | 262  | 425  |
| LmjF12.0990 | <i>L. major</i> | 60  | 430  | 489  |
| LmjF12.0990 | <i>L. major</i> | 43  | 524  | 566  |
| LmjF12.0995 | <i>L. major</i> | 265 | 85   | 349  |
| LmjF12.0995 | <i>L. major</i> | 71  | 488  | 558  |
| LmjF12.0995 | <i>L. major</i> | 71  | 488  | 558  |
| LmjF12.1000 | <i>L. major</i> | 86  | 120  | 205  |
| LmjF12.1000 | <i>L. major</i> | 107 | 236  | 342  |
| LmjF12.1005 | <i>L. major</i> | 260 | 1    | 260  |
| LmjF12.1015 | <i>L. major</i> | 213 | 1    | 213  |
| LmjF12.1015 | <i>L. major</i> | 71  | 352  | 422  |
| LmjF12.1015 | <i>L. major</i> | 71  | 352  | 422  |
| LmjF12.1020 | <i>L. major</i> | 232 | 235  | 466  |
| LmjF12.1030 | <i>L. major</i> | 91  | 172  | 262  |
| LmjF12.1030 | <i>L. major</i> | 147 | 289  | 435  |
| LmjF12.1040 | <i>L. major</i> | 256 | 235  | 490  |
| LmjF12.1050 | <i>L. major</i> | 90  | 219  | 308  |
| LmjF12.1050 | <i>L. major</i> | 107 | 333  | 439  |
| LmjF12.1060 | <i>L. major</i> | 108 | 382  | 489  |
| LmjF12.1070 | <i>L. major</i> | 62  | 360  | 421  |
| LmjF12.1070 | <i>L. major</i> | 210 | 452  | 661  |
| LmjF12.1090 | <i>L. major</i> | 148 | 281  | 428  |
| LmjF12.1100 | <i>L. major</i> | 142 | 1    | 142  |
| LmjF12.1100 | <i>L. major</i> | 62  | 298  | 359  |
| LmjF12.1100 | <i>L. major</i> | 282 | 372  | 653  |
| LmjF12.1100 | <i>L. major</i> | 64  | 658  | 721  |
| LmjF12.1100 | <i>L. major</i> | 51  | 748  | 798  |
| LmjF12.1100 | <i>L. major</i> | 222 | 835  | 1056 |
| LmjF12.1100 | <i>L. major</i> | 90  | 1411 | 1500 |
| LmjF12.1110 | <i>L. major</i> | 73  | 13   | 85   |
| LmjF12.1110 | <i>L. major</i> | 485 | 116  | 600  |
| LmjF12.1110 | <i>L. major</i> | 92  | 642  | 733  |
| LmjF12.1120 | <i>L. major</i> | 440 | 145  | 584  |
| LmjF12.1120 | <i>L. major</i> | 265 | 708  | 972  |
| LmjF12.1120 | <i>L. major</i> | 50  | 1015 | 1064 |
| LmjF12.1140 | <i>L. major</i> | 74  | 375  | 448  |
| LmjF12.1150 | <i>L. major</i> | 96  | 30   | 125  |

|             |                 |     |      |      |
|-------------|-----------------|-----|------|------|
| LmjF12.1150 | <i>L. major</i> | 66  | 158  | 223  |
| LmjF12.1150 | <i>L. major</i> | 411 | 286  | 696  |
| LmjF12.1150 | <i>L. major</i> | 87  | 777  | 863  |
| LmjF12.1150 | <i>L. major</i> | 49  | 895  | 943  |
| LmjF12.1150 | <i>L. major</i> | 48  | 1051 | 1098 |
| LmjF12.1160 | <i>L. major</i> | 109 | 200  | 308  |
| LmjF12.1160 | <i>L. major</i> | 104 | 329  | 432  |
| LmjF12.1160 | <i>L. major</i> | 253 | 695  | 947  |
| LmjF12.1170 | <i>L. major</i> | 201 | 524  | 724  |
| LmjF12.1180 | <i>L. major</i> | 364 | 27   | 390  |
| LmjF12.1180 | <i>L. major</i> | 63  | 466  | 528  |
| LmjF12.1180 | <i>L. major</i> | 67  | 650  | 716  |
| LmjF12.1180 | <i>L. major</i> | 53  | 813  | 865  |
| LmjF12.1190 | <i>L. major</i> | 60  | 1    | 60   |
| LmjF12.1190 | <i>L. major</i> | 62  | 159  | 220  |
| LmjF12.1190 | <i>L. major</i> | 54  | 262  | 315  |
| LmjF12.1190 | <i>L. major</i> | 82  | 507  | 588  |
| LmjF12.1190 | <i>L. major</i> | 44  | 663  | 706  |
| LmjF12.1190 | <i>L. major</i> | 97  | 1143 | 1239 |
| LmjF12.1190 | <i>L. major</i> | 59  | 1272 | 1330 |
| LmjF12.1200 | <i>L. major</i> | 95  | 1    | 95   |
| LmjF12.1200 | <i>L. major</i> | 160 | 369  | 528  |
| LmjF12.1210 | <i>L. major</i> | 245 | 1    | 245  |
| LmjF12.1210 | <i>L. major</i> | 291 | 281  | 571  |
| LmjF12.1210 | <i>L. major</i> | 92  | 643  | 734  |
| LmjF12.1210 | <i>L. major</i> | 259 | 748  | 1006 |
| LmjF12.1220 | <i>L. major</i> | 42  | 289  | 330  |
| LmjF12.1220 | <i>L. major</i> | 223 | 350  | 572  |
| LmjF12.1220 | <i>L. major</i> | 371 | 988  | 1358 |
| LmjF12.1220 | <i>L. major</i> | 48  | 1360 | 1407 |
| LmjF12.1240 | <i>L. major</i> | 79  | 1    | 79   |
| LmjF12.1240 | <i>L. major</i> | 56  | 111  | 166  |
| LmjF12.1240 | <i>L. major</i> | 86  | 298  | 383  |
| LmjF12.1240 | <i>L. major</i> | 106 | 408  | 513  |
| LmjF12.1240 | <i>L. major</i> | 136 | 588  | 723  |
| LmjF12.1250 | <i>L. major</i> | 55  | 665  | 719  |
| LmjF12.1250 | <i>L. major</i> | 95  | 900  | 994  |
| LmjF12.1250 | <i>L. major</i> | 83  | 1006 | 1088 |
| LmjF12.1250 | <i>L. major</i> | 48  | 1254 | 1301 |
| LmjF12.1260 | <i>L. major</i> | 110 | 74   | 183  |
| LmjF12.1280 | <i>L. major</i> | 654 | 1    | 654  |
| LmjF12.1290 | <i>L. major</i> | 64  | 150  | 213  |
| LmjF12.1300 | <i>L. major</i> | 68  | 220  | 287  |
| LmjF12.1330 | <i>L. major</i> | 48  | 493  | 540  |
| LmjF12.1340 | <i>L. major</i> | 160 | 103  | 262  |
| LmjF12.1340 | <i>L. major</i> | 62  | 278  | 339  |
| LmjF12.1340 | <i>L. major</i> | 51  | 388  | 438  |

|             |                 |     |      |      |
|-------------|-----------------|-----|------|------|
| LmjF13.0010 | <i>L. major</i> | 73  | 73   | 145  |
| LmjF13.0020 | <i>L. major</i> | 41  | 285  | 325  |
| LmjF13.0030 | <i>L. major</i> | 51  | 1    | 51   |
| LmjF13.0040 | <i>L. major</i> | 148 | 1    | 148  |
| LmjF13.0060 | <i>L. major</i> | 56  | 1    | 56   |
| LmjF13.0060 | <i>L. major</i> | 114 | 86   | 199  |
| LmjF13.0060 | <i>L. major</i> | 93  | 260  | 352  |
| LmjF13.0070 | <i>L. major</i> | 41  | 35   | 75   |
| LmjF13.0070 | <i>L. major</i> | 40  | 88   | 127  |
| LmjF13.0070 | <i>L. major</i> | 177 | 131  | 307  |
| LmjF13.0080 | <i>L. major</i> | 52  | 1378 | 1429 |
| LmjF13.0100 | <i>L. major</i> | 47  | 231  | 277  |
| LmjF13.0100 | <i>L. major</i> | 119 | 415  | 533  |
| LmjF13.0110 | <i>L. major</i> | 44  | 33   | 76   |
| LmjF13.0120 | <i>L. major</i> | 56  | 1    | 56   |
| LmjF13.0130 | <i>L. major</i> | 70  | 1    | 70   |
| LmjF13.0130 | <i>L. major</i> | 73  | 225  | 297  |
| LmjF13.0130 | <i>L. major</i> | 83  | 386  | 468  |
| LmjF13.0130 | <i>L. major</i> | 131 | 520  | 650  |
| LmjF13.0140 | <i>L. major</i> | 42  | 61   | 102  |
| LmjF13.0150 | <i>L. major</i> | 148 | 68   | 215  |
| LmjF13.0170 | <i>L. major</i> | 47  | 133  | 179  |
| LmjF13.0170 | <i>L. major</i> | 78  | 499  | 576  |
| LmjF13.0180 | <i>L. major</i> | 57  | 45   | 101  |
| LmjF13.0190 | <i>L. major</i> | 75  | 18   | 92   |
| LmjF13.0190 | <i>L. major</i> | 59  | 131  | 189  |
| LmjF13.0200 | <i>L. major</i> | 45  | 1    | 45   |
| LmjF13.0200 | <i>L. major</i> | 49  | 126  | 174  |
| LmjF13.0200 | <i>L. major</i> | 77  | 574  | 650  |
| LmjF13.0210 | <i>L. major</i> | 191 | 392  | 582  |
| LmjF13.0230 | <i>L. major</i> | 328 | 93   | 420  |
| LmjF13.0240 | <i>L. major</i> | 58  | 1    | 58   |
| LmjF13.0240 | <i>L. major</i> | 55  | 64   | 118  |
| LmjF13.0240 | <i>L. major</i> | 76  | 153  | 228  |
| LmjF13.0250 | <i>L. major</i> | 63  | 65   | 127  |
| LmjF13.0260 | <i>L. major</i> | 99  | 162  | 260  |
| LmjF13.0270 | <i>L. major</i> | 73  | 117  | 189  |
| LmjF13.0270 | <i>L. major</i> | 176 | 290  | 465  |
| LmjF13.0270 | <i>L. major</i> | 67  | 655  | 721  |
| LmjF13.0270 | <i>L. major</i> | 93  | 961  | 1053 |
| LmjF13.0270 | <i>L. major</i> | 97  | 1153 | 1249 |
| LmjF13.0270 | <i>L. major</i> | 44  | 1376 | 1419 |
| LmjF13.0270 | <i>L. major</i> | 145 | 1436 | 1580 |
| LmjF13.0270 | <i>L. major</i> | 53  | 1665 | 1717 |
| LmjF13.0400 | <i>L. major</i> | 50  | 52   | 101  |
| LmjF13.0400 | <i>L. major</i> | 157 | 150  | 306  |
| LmjF13.0400 | <i>L. major</i> | 102 | 1456 | 1557 |

|             |                 |     |      |      |
|-------------|-----------------|-----|------|------|
| LmjF13.0400 | <i>L. major</i> | 48  | 1848 | 1895 |
| LmjF13.0400 | <i>L. major</i> | 100 | 1932 | 2031 |
| LmjF13.0410 | <i>L. major</i> | 41  | 37   | 77   |
| LmjF13.0410 | <i>L. major</i> | 75  | 659  | 733  |
| LmjF13.0410 | <i>L. major</i> | 63  | 861  | 923  |
| LmjF13.0430 | <i>L. major</i> | 68  | 290  | 357  |
| LmjF13.0430 | <i>L. major</i> | 122 | 366  | 487  |
| LmjF13.0430 | <i>L. major</i> | 61  | 531  | 591  |
| LmjF13.0470 | <i>L. major</i> | 96  | 392  | 487  |
| LmjF13.0480 | <i>L. major</i> | 155 | 1    | 155  |
| LmjF13.0480 | <i>L. major</i> | 145 | 182  | 326  |
| LmjF13.0480 | <i>L. major</i> | 125 | 342  | 466  |
| LmjF13.0490 | <i>L. major</i> | 67  | 1    | 67   |
| LmjF13.0490 | <i>L. major</i> | 48  | 272  | 319  |
| LmjF13.0490 | <i>L. major</i> | 48  | 435  | 482  |
| LmjF13.0520 | <i>L. major</i> | 188 | 1    | 188  |
| LmjF13.0520 | <i>L. major</i> | 42  | 237  | 278  |
| LmjF13.0530 | <i>L. major</i> | 123 | 1    | 123  |
| LmjF13.0530 | <i>L. major</i> | 128 | 282  | 409  |
| LmjF13.0530 | <i>L. major</i> | 77  | 412  | 488  |
| LmjF13.0530 | <i>L. major</i> | 138 | 547  | 684  |
| LmjF13.0530 | <i>L. major</i> | 301 | 696  | 996  |
| LmjF13.0550 | <i>L. major</i> | 52  | 95   | 146  |
| LmjF13.0550 | <i>L. major</i> | 129 | 232  | 360  |
| LmjF13.0550 | <i>L. major</i> | 93  | 530  | 622  |
| LmjF13.0560 | <i>L. major</i> | 51  | 148  | 198  |
| LmjF13.0580 | <i>L. major</i> | 43  | 1    | 43   |
| LmjF13.0580 | <i>L. major</i> | 98  | 110  | 207  |
| LmjF13.0580 | <i>L. major</i> | 101 | 457  | 557  |
| LmjF13.0580 | <i>L. major</i> | 68  | 659  | 726  |
| LmjF13.0580 | <i>L. major</i> | 44  | 733  | 776  |
| LmjF13.0580 | <i>L. major</i> | 71  | 824  | 894  |
| LmjF13.0580 | <i>L. major</i> | 73  | 935  | 1007 |
| LmjF13.0580 | <i>L. major</i> | 59  | 1043 | 1101 |
| LmjF13.0580 | <i>L. major</i> | 77  | 1161 | 1237 |
| LmjF13.0580 | <i>L. major</i> | 43  | 1270 | 1312 |
| LmjF13.0580 | <i>L. major</i> | 45  | 1352 | 1396 |
| LmjF13.0580 | <i>L. major</i> | 44  | 1436 | 1479 |
| LmjF13.0590 | <i>L. major</i> | 40  | 211  | 250  |
| LmjF13.0600 | <i>L. major</i> | 83  | 1    | 83   |
| LmjF13.0600 | <i>L. major</i> | 41  | 112  | 152  |
| LmjF13.0600 | <i>L. major</i> | 41  | 112  | 152  |
| LmjF13.0610 | <i>L. major</i> | 55  | 122  | 176  |
| LmjF13.0620 | <i>L. major</i> | 392 | 1    | 392  |
| LmjF13.0630 | <i>L. major</i> | 131 | 62   | 192  |
| LmjF13.0630 | <i>L. major</i> | 65  | 238  | 302  |
| LmjF13.0640 | <i>L. major</i> | 40  | 778  | 817  |

|             |                 |     |      |      |
|-------------|-----------------|-----|------|------|
| LmjF13.0640 | <i>L. major</i> | 158 | 1120 | 1277 |
| LmjF13.0650 | <i>L. major</i> | 158 | 93   | 250  |
| LmjF13.0650 | <i>L. major</i> | 83  | 525  | 607  |
| LmjF13.0660 | <i>L. major</i> | 62  | 569  | 630  |
| LmjF13.0670 | <i>L. major</i> | 224 | 252  | 475  |
| LmjF13.0680 | <i>L. major</i> | 162 | 1    | 162  |
| LmjF13.0690 | <i>L. major</i> | 173 | 20   | 192  |
| LmjF13.0690 | <i>L. major</i> | 556 | 216  | 771  |
| LmjF13.0690 | <i>L. major</i> | 40  | 823  | 862  |
| LmjF13.0700 | <i>L. major</i> | 51  | 1    | 51   |
| LmjF13.0700 | <i>L. major</i> | 476 | 97   | 572  |
| LmjF13.0700 | <i>L. major</i> | 63  | 647  | 709  |
| LmjF13.0700 | <i>L. major</i> | 127 | 790  | 916  |
| LmjF13.0700 | <i>L. major</i> | 72  | 986  | 1057 |
| LmjF13.0700 | <i>L. major</i> | 63  | 1216 | 1278 |
| LmjF13.0710 | <i>L. major</i> | 302 | 121  | 422  |
| LmjF13.0730 | <i>L. major</i> | 366 | 73   | 438  |
| LmjF13.0730 | <i>L. major</i> | 48  | 489  | 536  |
| LmjF13.0730 | <i>L. major</i> | 240 | 606  | 845  |
| LmjF13.0740 | <i>L. major</i> | 116 | 1    | 116  |
| LmjF13.0740 | <i>L. major</i> | 45  | 735  | 779  |
| LmjF13.0740 | <i>L. major</i> | 45  | 735  | 779  |
| LmjF13.0750 | <i>L. major</i> | 138 | 1    | 138  |
| LmjF13.0760 | <i>L. major</i> | 225 | 145  | 369  |
| LmjF13.0760 | <i>L. major</i> | 297 | 515  | 811  |
| LmjF13.0760 | <i>L. major</i> | 291 | 1087 | 1377 |
| LmjF13.0760 | <i>L. major</i> | 81  | 1451 | 1531 |
| LmjF13.0760 | <i>L. major</i> | 72  | 1595 | 1666 |
| LmjF13.0760 | <i>L. major</i> | 52  | 1690 | 1741 |
| LmjF13.0760 | <i>L. major</i> | 109 | 1789 | 1897 |
| LmjF13.0780 | <i>L. major</i> | 47  | 210  | 256  |
| LmjF13.0790 | <i>L. major</i> | 109 | 65   | 173  |
| LmjF13.0790 | <i>L. major</i> | 83  | 183  | 265  |
| LmjF13.0790 | <i>L. major</i> | 65  | 308  | 372  |
| LmjF13.0790 | <i>L. major</i> | 84  | 592  | 675  |
| LmjF13.0800 | <i>L. major</i> | 41  | 1    | 41   |
| LmjF13.0800 | <i>L. major</i> | 129 | 97   | 225  |
| LmjF13.0810 | <i>L. major</i> | 188 | 1    | 188  |
| LmjF13.0810 | <i>L. major</i> | 394 | 213  | 606  |
| LmjF13.0810 | <i>L. major</i> | 180 | 628  | 807  |
| LmjF13.0810 | <i>L. major</i> | 125 | 858  | 982  |
| LmjF13.0810 | <i>L. major</i> | 134 | 997  | 1130 |
| LmjF13.0810 | <i>L. major</i> | 105 | 1228 | 1332 |
| LmjF13.0810 | <i>L. major</i> | 130 | 1355 | 1484 |
| LmjF13.0810 | <i>L. major</i> | 243 | 1496 | 1738 |
| LmjF13.0810 | <i>L. major</i> | 119 | 1800 | 1918 |
| LmjF13.0810 | <i>L. major</i> | 77  | 1965 | 2041 |



|             |                 |     |      |      |
|-------------|-----------------|-----|------|------|
| LmjF13.0810 | <i>L. major</i> | 51  | 2329 | 2379 |
| LmjF13.0810 | <i>L. major</i> | 150 | 2412 | 2561 |
| LmjF13.0820 | <i>L. major</i> | 40  | 116  | 155  |
| LmjF13.0830 | <i>L. major</i> | 121 | 1    | 121  |
| LmjF13.0830 | <i>L. major</i> | 151 | 152  | 302  |
| LmjF13.0830 | <i>L. major</i> | 125 | 424  | 548  |
| LmjF13.0830 | <i>L. major</i> | 79  | 601  | 679  |
| LmjF13.0830 | <i>L. major</i> | 93  | 682  | 774  |
| LmjF13.0830 | <i>L. major</i> | 46  | 820  | 865  |
| LmjF13.0830 | <i>L. major</i> | 54  | 1183 | 1236 |
| LmjF13.0840 | <i>L. major</i> | 58  | 1    | 58   |
| LmjF13.0840 | <i>L. major</i> | 112 | 97   | 208  |
| LmjF13.0840 | <i>L. major</i> | 52  | 243  | 294  |
| LmjF13.0840 | <i>L. major</i> | 151 | 324  | 474  |
| LmjF13.0840 | <i>L. major</i> | 69  | 497  | 565  |
| LmjF13.0840 | <i>L. major</i> | 407 | 604  | 1010 |
| LmjF13.0850 | <i>L. major</i> | 400 | 1    | 400  |
| LmjF13.0850 | <i>L. major</i> | 119 | 462  | 580  |
| LmjF13.0850 | <i>L. major</i> | 129 | 614  | 742  |
| LmjF13.0850 | <i>L. major</i> | 166 | 760  | 925  |
| LmjF13.0860 | <i>L. major</i> | 65  | 105  | 169  |
| LmjF13.0860 | <i>L. major</i> | 150 | 239  | 388  |
| LmjF13.0880 | <i>L. major</i> | 263 | 80   | 342  |
| LmjF13.0880 | <i>L. major</i> | 243 | 456  | 698  |
| LmjF13.0890 | <i>L. major</i> | 79  | 103  | 181  |
| LmjF13.0890 | <i>L. major</i> | 97  | 234  | 330  |
| LmjF13.0890 | <i>L. major</i> | 97  | 234  | 330  |
| LmjF13.0900 | <i>L. major</i> | 149 | 51   | 199  |
| LmjF13.0900 | <i>L. major</i> | 127 | 299  | 425  |
| LmjF13.0900 | <i>L. major</i> | 165 | 455  | 619  |
| LmjF13.0910 | <i>L. major</i> | 59  | 48   | 106  |
| LmjF13.0910 | <i>L. major</i> | 311 | 210  | 520  |
| LmjF13.0910 | <i>L. major</i> | 44  | 788  | 831  |
| LmjF13.0920 | <i>L. major</i> | 105 | 1    | 105  |
| LmjF13.0920 | <i>L. major</i> | 40  | 183  | 222  |
| LmjF13.0920 | <i>L. major</i> | 43  | 255  | 297  |
| LmjF13.0920 | <i>L. major</i> | 44  | 319  | 362  |
| LmjF13.0920 | <i>L. major</i> | 98  | 419  | 516  |
| LmjF13.0920 | <i>L. major</i> | 89  | 547  | 635  |
| LmjF13.0920 | <i>L. major</i> | 82  | 800  | 881  |
| LmjF13.0920 | <i>L. major</i> | 92  | 883  | 974  |
| LmjF13.0920 | <i>L. major</i> | 109 | 1050 | 1158 |
| LmjF13.0920 | <i>L. major</i> | 203 | 1265 | 1467 |
| LmjF13.0940 | <i>L. major</i> | 43  | 20   | 62   |
| LmjF13.0940 | <i>L. major</i> | 124 | 373  | 496  |
| LmjF13.0950 | <i>L. major</i> | 67  | 235  | 301  |
| LmjF13.0960 | <i>L. major</i> | 156 | 105  | 260  |

|             |                 |     |      |      |
|-------------|-----------------|-----|------|------|
| LmjF13.0970 | <i>L. major</i> | 110 | 1    | 110  |
| LmjF13.0970 | <i>L. major</i> | 49  | 183  | 231  |
| LmjF13.0970 | <i>L. major</i> | 164 | 318  | 481  |
| LmjF13.0980 | <i>L. major</i> | 46  | 122  | 167  |
| LmjF13.0980 | <i>L. major</i> | 55  | 264  | 318  |
| LmjF13.0980 | <i>L. major</i> | 68  | 505  | 572  |
| LmjF13.0980 | <i>L. major</i> | 72  | 809  | 880  |
| LmjF13.0980 | <i>L. major</i> | 150 | 939  | 1088 |
| LmjF13.0990 | <i>L. major</i> | 375 | 1    | 375  |
| LmjF13.0990 | <i>L. major</i> | 47  | 381  | 427  |
| LmjF13.0990 | <i>L. major</i> | 50  | 441  | 490  |
| LmjF13.1000 | <i>L. major</i> | 62  | 1    | 62   |
| LmjF13.1000 | <i>L. major</i> | 66  | 135  | 200  |
| LmjF13.1000 | <i>L. major</i> | 144 | 228  | 371  |
| LmjF13.1010 | <i>L. major</i> | 44  | 89   | 132  |
| LmjF13.1020 | <i>L. major</i> | 73  | 119  | 191  |
| LmjF13.1020 | <i>L. major</i> | 60  | 222  | 281  |
| LmjF13.1020 | <i>L. major</i> | 49  | 469  | 517  |
| LmjF13.1020 | <i>L. major</i> | 42  | 606  | 647  |
| LmjF13.1020 | <i>L. major</i> | 61  | 720  | 780  |
| LmjF13.1020 | <i>L. major</i> | 45  | 1053 | 1097 |
| LmjF13.1020 | <i>L. major</i> | 135 | 1169 | 1303 |
| LmjF13.1030 | <i>L. major</i> | 82  | 1    | 82   |
| LmjF13.1030 | <i>L. major</i> | 48  | 261  | 308  |
| LmjF13.1030 | <i>L. major</i> | 48  | 261  | 308  |
| LmjF13.1040 | <i>L. major</i> | 61  | 437  | 497  |
| LmjF13.1040 | <i>L. major</i> | 52  | 561  | 612  |
| LmjF13.1040 | <i>L. major</i> | 118 | 641  | 758  |
| LmjF13.1040 | <i>L. major</i> | 43  | 782  | 824  |
| LmjF13.1040 | <i>L. major</i> | 42  | 835  | 876  |
| LmjF13.1040 | <i>L. major</i> | 96  | 1114 | 1209 |
| LmjF13.1040 | <i>L. major</i> | 49  | 1274 | 1322 |
| LmjF13.1070 | <i>L. major</i> | 205 | 152  | 356  |
| LmjF13.1070 | <i>L. major</i> | 47  | 395  | 441  |
| LmjF13.1070 | <i>L. major</i> | 89  | 660  | 748  |
| LmjF13.1070 | <i>L. major</i> | 49  | 897  | 945  |
| LmjF13.1070 | <i>L. major</i> | 54  | 1142 | 1195 |
| LmjF13.1070 | <i>L. major</i> | 52  | 1203 | 1254 |
| LmjF13.1070 | <i>L. major</i> | 60  | 1640 | 1699 |
| LmjF13.1070 | <i>L. major</i> | 40  | 1754 | 1793 |
| LmjF13.1070 | <i>L. major</i> | 89  | 1915 | 2003 |
| LmjF13.1070 | <i>L. major</i> | 67  | 2068 | 2134 |
| LmjF13.1070 | <i>L. major</i> | 84  | 2144 | 2227 |
| LmjF13.1080 | <i>L. major</i> | 42  | 88   | 129  |
| LmjF13.1080 | <i>L. major</i> | 54  | 138  | 191  |
| LmjF13.1080 | <i>L. major</i> | 91  | 634  | 724  |
| LmjF13.1080 | <i>L. major</i> | 115 | 818  | 932  |

|             |                 |     |      |      |
|-------------|-----------------|-----|------|------|
| LmjF13.1080 | <i>L. major</i> | 67  | 1221 | 1287 |
| LmjF13.1090 | <i>L. major</i> | 45  | 1    | 45   |
| LmjF13.1100 | <i>L. major</i> | 49  | 102  | 150  |
| LmjF13.1110 | <i>L. major</i> | 454 | 43   | 496  |
| LmjF13.1130 | <i>L. major</i> | 63  | 91   | 153  |
| LmjF13.1130 | <i>L. major</i> | 108 | 226  | 333  |
| LmjF13.1160 | <i>L. major</i> | 96  | 39   | 134  |
| LmjF13.1170 | <i>L. major</i> | 119 | 20   | 138  |
| LmjF13.1170 | <i>L. major</i> | 104 | 174  | 277  |
| LmjF13.1170 | <i>L. major</i> | 75  | 396  | 470  |
| LmjF13.1190 | <i>L. major</i> | 114 | 1    | 114  |
| LmjF13.1200 | <i>L. major</i> | 74  | 1    | 74   |
| LmjF13.1210 | <i>L. major</i> | 105 | 229  | 333  |
| LmjF13.1240 | <i>L. major</i> | 41  | 1    | 41   |
| LmjF13.1240 | <i>L. major</i> | 75  | 308  | 382  |
| LmjF13.1240 | <i>L. major</i> | 42  | 537  | 578  |
| LmjF13.1250 | <i>L. major</i> | 76  | 1    | 76   |
| LmjF13.1250 | <i>L. major</i> | 80  | 138  | 217  |
| LmjF13.1260 | <i>L. major</i> | 64  | 129  | 192  |
| LmjF13.1270 | <i>L. major</i> | 40  | 110  | 149  |
| LmjF13.1270 | <i>L. major</i> | 52  | 255  | 306  |
| LmjF13.1270 | <i>L. major</i> | 113 | 482  | 594  |
| LmjF13.1270 | <i>L. major</i> | 72  | 654  | 725  |
| LmjF13.1280 | <i>L. major</i> | 41  | 216  | 256  |
| LmjF13.1290 | <i>L. major</i> | 198 | 1    | 198  |
| LmjF13.1290 | <i>L. major</i> | 222 | 227  | 448  |
| LmjF13.1290 | <i>L. major</i> | 43  | 564  | 606  |
| LmjF13.1290 | <i>L. major</i> | 83  | 711  | 793  |
| LmjF13.1310 | <i>L. major</i> | 109 | 312  | 420  |
| LmjF13.1320 | <i>L. major</i> | 154 | 311  | 464  |
| LmjF13.1330 | <i>L. major</i> | 51  | 92   | 142  |
| LmjF13.1330 | <i>L. major</i> | 61  | 361  | 421  |
| LmjF13.1340 | <i>L. major</i> | 159 | 1    | 159  |
| LmjF13.1340 | <i>L. major</i> | 153 | 432  | 584  |
| LmjF13.1340 | <i>L. major</i> | 137 | 628  | 764  |
| LmjF13.1340 | <i>L. major</i> | 109 | 790  | 898  |
| LmjF13.1340 | <i>L. major</i> | 220 | 921  | 1140 |
| LmjF13.1340 | <i>L. major</i> | 233 | 1156 | 1388 |
| LmjF13.1350 | <i>L. major</i> | 71  | 45   | 115  |
| LmjF13.1350 | <i>L. major</i> | 99  | 198  | 296  |
| LmjF13.1350 | <i>L. major</i> | 116 | 564  | 679  |
| LmjF13.1350 | <i>L. major</i> | 63  | 728  | 790  |
| LmjF13.1350 | <i>L. major</i> | 69  | 821  | 889  |
| LmjF13.1350 | <i>L. major</i> | 46  | 969  | 1014 |
| LmjF13.1350 | <i>L. major</i> | 83  | 1016 | 1098 |
| LmjF13.1360 | <i>L. major</i> | 145 | 383  | 527  |
| LmjF13.1360 | <i>L. major</i> | 73  | 611  | 683  |

|             |                 |     |      |      |
|-------------|-----------------|-----|------|------|
| LmjF13.1360 | <i>L. major</i> | 73  | 611  | 683  |
| LmjF13.1370 | <i>L. major</i> | 57  | 55   | 111  |
| LmjF13.1370 | <i>L. major</i> | 115 | 160  | 274  |
| LmjF13.1370 | <i>L. major</i> | 43  | 407  | 449  |
| LmjF13.1370 | <i>L. major</i> | 66  | 471  | 536  |
| LmjF13.1390 | <i>L. major</i> | 47  | 1    | 47   |
| LmjF13.1400 | <i>L. major</i> | 48  | 541  | 588  |
| LmjF13.1410 | <i>L. major</i> | 250 | 1    | 250  |
| LmjF13.1410 | <i>L. major</i> | 271 | 260  | 530  |
| LmjF13.1410 | <i>L. major</i> | 251 | 585  | 835  |
| LmjF13.1410 | <i>L. major</i> | 241 | 848  | 1088 |
| LmjF13.1410 | <i>L. major</i> | 254 | 1156 | 1409 |
| LmjF13.1420 | <i>L. major</i> | 89  | 1    | 89   |
| LmjF13.1420 | <i>L. major</i> | 62  | 133  | 194  |
| LmjF13.1420 | <i>L. major</i> | 62  | 133  | 194  |
| LmjF13.1430 | <i>L. major</i> | 90  | 18   | 107  |
| LmjF13.1430 | <i>L. major</i> | 175 | 295  | 469  |
| LmjF13.1430 | <i>L. major</i> | 132 | 502  | 633  |
| LmjF13.1440 | <i>L. major</i> | 121 | 379  | 499  |
| LmjF13.1440 | <i>L. major</i> | 80  | 596  | 675  |
| LmjF13.1440 | <i>L. major</i> | 50  | 780  | 829  |
| LmjF13.1450 | <i>L. major</i> | 66  | 1    | 66   |
| LmjF13.1460 | <i>L. major</i> | 58  | 11   | 68   |
| LmjF13.1470 | <i>L. major</i> | 62  | 1    | 62   |
| LmjF13.1470 | <i>L. major</i> | 63  | 258  | 320  |
| LmjF13.1470 | <i>L. major</i> | 50  | 747  | 796  |
| LmjF13.1470 | <i>L. major</i> | 93  | 1195 | 1287 |
| LmjF13.1470 | <i>L. major</i> | 72  | 1405 | 1476 |
| LmjF13.1470 | <i>L. major</i> | 56  | 1672 | 1727 |
| LmjF13.1470 | <i>L. major</i> | 53  | 1928 | 1980 |
| LmjF13.1470 | <i>L. major</i> | 83  | 2053 | 2135 |
| LmjF13.1470 | <i>L. major</i> | 59  | 2158 | 2216 |
| LmjF13.1470 | <i>L. major</i> | 119 | 2386 | 2504 |
| LmjF13.1470 | <i>L. major</i> | 40  | 2614 | 2653 |
| LmjF13.1470 | <i>L. major</i> | 41  | 2814 | 2854 |
| LmjF13.1470 | <i>L. major</i> | 209 | 3100 | 3308 |
| LmjF13.1470 | <i>L. major</i> | 194 | 4104 | 4297 |
| LmjF13.1470 | <i>L. major</i> | 43  | 4638 | 4680 |
| LmjF13.1470 | <i>L. major</i> | 46  | 4744 | 4789 |
| LmjF13.1470 | <i>L. major</i> | 42  | 4922 | 4963 |
| LmjF13.1470 | <i>L. major</i> | 180 | 5380 | 5559 |
| LmjF13.1490 | <i>L. major</i> | 43  | 312  | 354  |
| LmjF13.1490 | <i>L. major</i> | 46  | 366  | 411  |
| LmjF13.1490 | <i>L. major</i> | 189 | 577  | 765  |
| LmjF13.1500 | <i>L. major</i> | 640 | 1    | 640  |
| LmjF13.1500 | <i>L. major</i> | 214 | 664  | 877  |
| LmjF13.1500 | <i>L. major</i> | 45  | 1033 | 1077 |

|             |                 |     |      |      |
|-------------|-----------------|-----|------|------|
| LmjF13.1510 | <i>L. major</i> | 82  | 1    | 82   |
| LmjF13.1520 | <i>L. major</i> | 62  | 166  | 227  |
| LmjF13.1520 | <i>L. major</i> | 52  | 284  | 335  |
| LmjF13.1520 | <i>L. major</i> | 84  | 365  | 448  |
| LmjF13.1520 | <i>L. major</i> | 79  | 502  | 580  |
| LmjF13.1540 | <i>L. major</i> | 83  | 60   | 142  |
| LmjF13.1540 | <i>L. major</i> | 66  | 334  | 399  |
| LmjF13.1540 | <i>L. major</i> | 66  | 334  | 399  |
| LmjF13.1550 | <i>L. major</i> | 44  | 485  | 528  |
| LmjF13.1550 | <i>L. major</i> | 177 | 758  | 934  |
| LmjF13.1550 | <i>L. major</i> | 200 | 944  | 1143 |
| LmjF13.1570 | <i>L. major</i> | 58  | 89   | 146  |
| LmjF13.1570 | <i>L. major</i> | 76  | 169  | 244  |
| LmjF13.1570 | <i>L. major</i> | 76  | 169  | 244  |
| LmjF13.1590 | <i>L. major</i> | 617 | 1    | 617  |
| LmjF13.1590 | <i>L. major</i> | 44  | 707  | 750  |
| LmjF13.1600 | <i>L. major</i> | 201 | 100  | 300  |
| LmjF13.1600 | <i>L. major</i> | 153 | 337  | 489  |
| LmjF13.1600 | <i>L. major</i> | 63  | 518  | 580  |
| LmjF13.1600 | <i>L. major</i> | 355 | 618  | 972  |
| LmjF13.1600 | <i>L. major</i> | 46  | 1015 | 1060 |
| LmjF13.1600 | <i>L. major</i> | 44  | 1091 | 1134 |
| LmjF13.1610 | <i>L. major</i> | 148 | 58   | 205  |
| LmjF13.1610 | <i>L. major</i> | 152 | 512  | 663  |
| LmjF13.1640 | <i>L. major</i> | 53  | 553  | 605  |
| LmjF13.1650 | <i>L. major</i> | 62  | 1202 | 1263 |
| LmjF13.1650 | <i>L. major</i> | 90  | 3145 | 3234 |
| LmjF13.1650 | <i>L. major</i> | 62  | 3359 | 3420 |
| LmjF13.1650 | <i>L. major</i> | 75  | 4075 | 4149 |
| LmjF13.1650 | <i>L. major</i> | 60  | 4380 | 4439 |
| LmjF13.1670 | <i>L. major</i> | 49  | 30   | 78   |
| LmjF14.0030 | <i>L. major</i> | 42  | 35   | 76   |
| LmjF14.0030 | <i>L. major</i> | 110 | 130  | 239  |
| LmjF14.0040 | <i>L. major</i> | 86  | 92   | 177  |
| LmjF14.0050 | <i>L. major</i> | 105 | 629  | 733  |
| LmjF14.0070 | <i>L. major</i> | 42  | 16   | 57   |
| LmjF14.0090 | <i>L. major</i> | 113 | 88   | 200  |
| LmjF14.0090 | <i>L. major</i> | 129 | 217  | 345  |
| LmjF14.0100 | <i>L. major</i> | 54  | 1    | 54   |
| LmjF14.0100 | <i>L. major</i> | 52  | 322  | 373  |
| LmjF14.0100 | <i>L. major</i> | 48  | 391  | 438  |
| LmjF14.0110 | <i>L. major</i> | 62  | 379  | 440  |
| LmjF14.0110 | <i>L. major</i> | 49  | 475  | 523  |
| LmjF14.0110 | <i>L. major</i> | 49  | 475  | 523  |
| LmjF14.0120 | <i>L. major</i> | 155 | 1    | 155  |
| LmjF14.0120 | <i>L. major</i> | 113 | 210  | 322  |
| LmjF14.0140 | <i>L. major</i> | 76  | 57   | 132  |

|             |                 |     |      |      |
|-------------|-----------------|-----|------|------|
| LmjF14.0140 | <i>L. major</i> | 54  | 185  | 238  |
| LmjF14.0150 | <i>L. major</i> | 48  | 76   | 123  |
| LmjF14.0160 | <i>L. major</i> | 65  | 54   | 118  |
| LmjF14.0170 | <i>L. major</i> | 40  | 1    | 40   |
| LmjF14.0170 | <i>L. major</i> | 126 | 187  | 312  |
| LmjF14.0170 | <i>L. major</i> | 56  | 630  | 685  |
| LmjF14.0190 | <i>L. major</i> | 43  | 157  | 199  |
| LmjF14.0200 | <i>L. major</i> | 152 | 39   | 190  |
| LmjF14.0210 | <i>L. major</i> | 46  | 1    | 46   |
| LmjF14.0210 | <i>L. major</i> | 43  | 59   | 101  |
| LmjF14.0210 | <i>L. major</i> | 52  | 154  | 205  |
| LmjF14.0210 | <i>L. major</i> | 53  | 339  | 391  |
| LmjF14.0220 | <i>L. major</i> | 73  | 157  | 229  |
| LmjF14.0230 | <i>L. major</i> | 112 | 149  | 260  |
| LmjF14.0230 | <i>L. major</i> | 44  | 323  | 366  |
| LmjF14.0230 | <i>L. major</i> | 77  | 439  | 515  |
| LmjF14.0230 | <i>L. major</i> | 50  | 548  | 597  |
| LmjF14.0230 | <i>L. major</i> | 71  | 618  | 688  |
| LmjF14.0230 | <i>L. major</i> | 78  | 821  | 898  |
| LmjF14.0230 | <i>L. major</i> | 75  | 1143 | 1217 |
| LmjF14.0230 | <i>L. major</i> | 272 | 1572 | 1843 |
| LmjF14.0260 | <i>L. major</i> | 43  | 362  | 404  |
| LmjF14.0260 | <i>L. major</i> | 40  | 593  | 632  |
| LmjF14.0260 | <i>L. major</i> | 40  | 593  | 632  |
| LmjF14.0270 | <i>L. major</i> | 52  | 1    | 52   |
| LmjF14.0280 | <i>L. major</i> | 141 | 824  | 964  |
| LmjF14.0290 | <i>L. major</i> | 46  | 1    | 46   |
| LmjF14.0300 | <i>L. major</i> | 83  | 74   | 156  |
| LmjF14.0310 | <i>L. major</i> | 53  | 233  | 285  |
| LmjF14.0320 | <i>L. major</i> | 43  | 589  | 631  |
| LmjF14.0320 | <i>L. major</i> | 153 | 651  | 803  |
| LmjF14.0330 | <i>L. major</i> | 185 | 1    | 185  |
| LmjF14.0340 | <i>L. major</i> | 397 | 1    | 397  |
| LmjF14.0340 | <i>L. major</i> | 109 | 427  | 535  |
| LmjF14.0340 | <i>L. major</i> | 95  | 550  | 644  |
| LmjF14.0340 | <i>L. major</i> | 121 | 717  | 837  |
| LmjF14.0340 | <i>L. major</i> | 43  | 927  | 969  |
| LmjF14.0350 | <i>L. major</i> | 56  | 621  | 676  |
| LmjF14.0360 | <i>L. major</i> | 202 | 70   | 271  |
| LmjF14.0360 | <i>L. major</i> | 60  | 408  | 467  |
| LmjF14.0360 | <i>L. major</i> | 141 | 598  | 738  |
| LmjF14.0360 | <i>L. major</i> | 207 | 772  | 978  |
| LmjF14.0360 | <i>L. major</i> | 56  | 984  | 1039 |
| LmjF14.0370 | <i>L. major</i> | 381 | 46   | 426  |
| LmjF14.0370 | <i>L. major</i> | 465 | 428  | 892  |
| LmjF14.0370 | <i>L. major</i> | 69  | 902  | 970  |
| LmjF14.0370 | <i>L. major</i> | 673 | 981  | 1653 |

|             |                 |     |      |      |
|-------------|-----------------|-----|------|------|
| LmjF14.0370 | <i>L. major</i> | 183 | 1658 | 1840 |
| LmjF14.0370 | <i>L. major</i> | 566 | 1867 | 2432 |
| LmjF14.0370 | <i>L. major</i> | 282 | 2452 | 2733 |
| LmjF14.0370 | <i>L. major</i> | 70  | 2745 | 2814 |
| LmjF14.0370 | <i>L. major</i> | 70  | 2852 | 2921 |
| LmjF14.0380 | <i>L. major</i> | 58  | 45   | 102  |
| LmjF14.0405 | <i>L. major</i> | 154 | 1    | 154  |
| LmjF14.0410 | <i>L. major</i> | 336 | 1    | 336  |
| LmjF14.0410 | <i>L. major</i> | 100 | 563  | 662  |
| LmjF14.0420 | <i>L. major</i> | 156 | 171  | 326  |
| LmjF14.0420 | <i>L. major</i> | 479 | 339  | 817  |
| LmjF14.0450 | <i>L. major</i> | 121 | 40   | 160  |
| LmjF14.0450 | <i>L. major</i> | 61  | 268  | 328  |
| LmjF14.0500 | <i>L. major</i> | 83  | 1    | 83   |
| LmjF14.0500 | <i>L. major</i> | 200 | 93   | 292  |
| LmjF14.0500 | <i>L. major</i> | 50  | 305  | 354  |
| LmjF14.0500 | <i>L. major</i> | 103 | 398  | 500  |
| LmjF14.0520 | <i>L. major</i> | 71  | 1    | 71   |
| LmjF14.0530 | <i>L. major</i> | 134 | 340  | 473  |
| LmjF14.0540 | <i>L. major</i> | 44  | 413  | 456  |
| LmjF14.0550 | <i>L. major</i> | 69  | 48   | 116  |
| LmjF14.0550 | <i>L. major</i> | 40  | 517  | 556  |
| LmjF14.0550 | <i>L. major</i> | 40  | 517  | 556  |
| LmjF14.0560 | <i>L. major</i> | 147 | 315  | 461  |
| LmjF14.0570 | <i>L. major</i> | 49  | 27   | 75   |
| LmjF14.0570 | <i>L. major</i> | 92  | 406  | 497  |
| LmjF14.0570 | <i>L. major</i> | 46  | 727  | 772  |
| LmjF14.0570 | <i>L. major</i> | 57  | 939  | 995  |
| LmjF14.0570 | <i>L. major</i> | 44  | 1088 | 1131 |
| LmjF14.0590 | <i>L. major</i> | 101 | 315  | 415  |
| LmjF14.0590 | <i>L. major</i> | 44  | 434  | 477  |
| LmjF14.0590 | <i>L. major</i> | 162 | 632  | 793  |
| LmjF14.0590 | <i>L. major</i> | 97  | 883  | 979  |
| LmjF14.0590 | <i>L. major</i> | 212 | 1037 | 1248 |
| LmjF14.0590 | <i>L. major</i> | 123 | 1256 | 1378 |
| LmjF14.0600 | <i>L. major</i> | 92  | 1    | 92   |
| LmjF14.0600 | <i>L. major</i> | 79  | 131  | 209  |
| LmjF14.0610 | <i>L. major</i> | 107 | 56   | 162  |
| LmjF14.0610 | <i>L. major</i> | 44  | 185  | 228  |
| LmjF14.0610 | <i>L. major</i> | 63  | 268  | 330  |
| LmjF14.0610 | <i>L. major</i> | 103 | 368  | 470  |
| LmjF14.0620 | <i>L. major</i> | 90  | 31   | 120  |
| LmjF14.0620 | <i>L. major</i> | 192 | 194  | 385  |
| LmjF14.0620 | <i>L. major</i> | 238 | 431  | 668  |
| LmjF14.0625 | <i>L. major</i> | 156 | 71   | 226  |
| LmjF14.0750 | <i>L. major</i> | 122 | 22   | 143  |
| LmjF14.0750 | <i>L. major</i> | 58  | 211  | 268  |

|             |                 |      |      |      |
|-------------|-----------------|------|------|------|
| LmjF14.0750 | <i>L. major</i> | 99   | 289  | 387  |
| LmjF14.0750 | <i>L. major</i> | 161  | 1079 | 1239 |
| LmjF14.0750 | <i>L. major</i> | 104  | 1243 | 1346 |
| LmjF14.0750 | <i>L. major</i> | 85   | 1361 | 1445 |
| LmjF14.0750 | <i>L. major</i> | 477  | 1481 | 1957 |
| LmjF14.0760 | <i>L. major</i> | 82   | 1    | 82   |
| LmjF14.0760 | <i>L. major</i> | 111  | 306  | 416  |
| LmjF14.0770 | <i>L. major</i> | 108  | 80   | 187  |
| LmjF14.0770 | <i>L. major</i> | 123  | 203  | 325  |
| LmjF14.0790 | <i>L. major</i> | 73   | 1    | 73   |
| LmjF14.0790 | <i>L. major</i> | 190  | 169  | 358  |
| LmjF14.0790 | <i>L. major</i> | 54   | 389  | 442  |
| LmjF14.0790 | <i>L. major</i> | 81   | 616  | 696  |
| LmjF14.0790 | <i>L. major</i> | 83   | 723  | 805  |
| LmjF14.0790 | <i>L. major</i> | 176  | 852  | 1027 |
| LmjF14.0790 | <i>L. major</i> | 43   | 1050 | 1092 |
| LmjF14.0790 | <i>L. major</i> | 152  | 1161 | 1312 |
| LmjF14.0790 | <i>L. major</i> | 49   | 1403 | 1451 |
| LmjF14.0790 | <i>L. major</i> | 67   | 1498 | 1564 |
| LmjF14.0790 | <i>L. major</i> | 130  | 1670 | 1799 |
| LmjF14.0790 | <i>L. major</i> | 72   | 1806 | 1877 |
| LmjF14.0790 | <i>L. major</i> | 48   | 1882 | 1929 |
| LmjF14.0790 | <i>L. major</i> | 139  | 2013 | 2151 |
| LmjF14.0790 | <i>L. major</i> | 106  | 2196 | 2301 |
| LmjF14.0790 | <i>L. major</i> | 106  | 2308 | 2413 |
| LmjF14.0790 | <i>L. major</i> | 1475 | 2449 | 3923 |
| LmjF14.0790 | <i>L. major</i> | 73   | 3952 | 4024 |
| LmjF14.0790 | <i>L. major</i> | 125  | 4041 | 4165 |
| LmjF14.0800 | <i>L. major</i> | 429  | 1    | 429  |
| LmjF14.0810 | <i>L. major</i> | 87   | 76   | 162  |
| LmjF14.0810 | <i>L. major</i> | 178  | 603  | 780  |
| LmjF14.0810 | <i>L. major</i> | 131  | 829  | 959  |
| LmjF14.0810 | <i>L. major</i> | 255  | 973  | 1227 |
| LmjF14.0810 | <i>L. major</i> | 62   | 1254 | 1315 |
| LmjF14.0820 | <i>L. major</i> | 56   | 82   | 137  |
| LmjF14.0820 | <i>L. major</i> | 140  | 144  | 283  |
| LmjF14.0820 | <i>L. major</i> | 264  | 314  | 577  |
| LmjF14.0830 | <i>L. major</i> | 406  | 1    | 406  |
| LmjF14.0830 | <i>L. major</i> | 125  | 608  | 732  |
| LmjF14.0830 | <i>L. major</i> | 95   | 819  | 913  |
| LmjF14.0840 | <i>L. major</i> | 205  | 1    | 205  |
| LmjF14.0840 | <i>L. major</i> | 228  | 219  | 446  |
| LmjF14.0840 | <i>L. major</i> | 40   | 743  | 782  |
| LmjF14.0840 | <i>L. major</i> | 116  | 1041 | 1156 |
| LmjF14.0840 | <i>L. major</i> | 92   | 1161 | 1252 |
| LmjF14.0850 | <i>L. major</i> | 48   | 68   | 115  |
| LmjF14.0880 | <i>L. major</i> | 87   | 1    | 87   |



|             |                 |     |      |      |
|-------------|-----------------|-----|------|------|
| LmjF14.0880 | <i>L. major</i> | 69  | 110  | 178  |
| LmjF14.0880 | <i>L. major</i> | 65  | 253  | 317  |
| LmjF14.0880 | <i>L. major</i> | 72  | 395  | 466  |
| LmjF14.0880 | <i>L. major</i> | 105 | 475  | 579  |
| LmjF14.0880 | <i>L. major</i> | 231 | 637  | 867  |
| LmjF14.0880 | <i>L. major</i> | 51  | 913  | 963  |
| LmjF14.0890 | <i>L. major</i> | 49  | 172  | 220  |
| LmjF14.0890 | <i>L. major</i> | 288 | 262  | 549  |
| LmjF14.0890 | <i>L. major</i> | 68  | 594  | 661  |
| LmjF14.0900 | <i>L. major</i> | 302 | 1    | 302  |
| LmjF14.0900 | <i>L. major</i> | 88  | 322  | 409  |
| LmjF14.0900 | <i>L. major</i> | 48  | 637  | 684  |
| LmjF14.0900 | <i>L. major</i> | 58  | 797  | 854  |
| LmjF14.0920 | <i>L. major</i> | 59  | 1    | 59   |
| LmjF14.0920 | <i>L. major</i> | 89  | 418  | 506  |
| LmjF14.0920 | <i>L. major</i> | 40  | 957  | 996  |
| LmjF14.0920 | <i>L. major</i> | 44  | 1116 | 1159 |
| LmjF14.0930 | <i>L. major</i> | 44  | 164  | 207  |
| LmjF14.0930 | <i>L. major</i> | 107 | 368  | 474  |
| LmjF14.0930 | <i>L. major</i> | 40  | 529  | 568  |
| LmjF14.0930 | <i>L. major</i> | 94  | 638  | 731  |
| LmjF14.0940 | <i>L. major</i> | 62  | 1    | 62   |
| LmjF14.0940 | <i>L. major</i> | 315 | 102  | 416  |
| LmjF14.0940 | <i>L. major</i> | 169 | 418  | 586  |
| LmjF14.0940 | <i>L. major</i> | 63  | 630  | 692  |
| LmjF14.0940 | <i>L. major</i> | 110 | 765  | 874  |
| LmjF14.0960 | <i>L. major</i> | 219 | 1    | 219  |
| LmjF14.0960 | <i>L. major</i> | 56  | 397  | 452  |
| LmjF14.0960 | <i>L. major</i> | 46  | 717  | 762  |
| LmjF14.0960 | <i>L. major</i> | 41  | 816  | 856  |
| LmjF14.0960 | <i>L. major</i> | 50  | 940  | 989  |
| LmjF14.0960 | <i>L. major</i> | 77  | 1039 | 1115 |
| LmjF14.0980 | <i>L. major</i> | 99  | 548  | 646  |
| LmjF14.1000 | <i>L. major</i> | 47  | 1    | 47   |
| LmjF14.1010 | <i>L. major</i> | 179 | 1    | 179  |
| LmjF14.1010 | <i>L. major</i> | 41  | 196  | 236  |
| LmjF14.1010 | <i>L. major</i> | 40  | 620  | 659  |
| LmjF14.1010 | <i>L. major</i> | 53  | 825  | 877  |
| LmjF14.1010 | <i>L. major</i> | 51  | 967  | 1017 |
| LmjF14.1020 | <i>L. major</i> | 114 | 66   | 179  |
| LmjF14.1020 | <i>L. major</i> | 41  | 186  | 226  |
| LmjF14.1020 | <i>L. major</i> | 54  | 261  | 314  |
| LmjF14.1060 | <i>L. major</i> | 59  | 1577 | 1635 |
| LmjF14.1060 | <i>L. major</i> | 46  | 1851 | 1896 |
| LmjF14.1060 | <i>L. major</i> | 65  | 2018 | 2082 |
| LmjF14.1060 | <i>L. major</i> | 117 | 2628 | 2744 |
| LmjF14.1060 | <i>L. major</i> | 46  | 2852 | 2897 |

|             |                 |      |      |      |
|-------------|-----------------|------|------|------|
| LmjF14.1060 | <i>L. major</i> | 72   | 3282 | 3353 |
| LmjF14.1060 | <i>L. major</i> | 74   | 3827 | 3900 |
| LmjF14.1060 | <i>L. major</i> | 84   | 3915 | 3998 |
| LmjF14.1070 | <i>L. major</i> | 228  | 1    | 228  |
| LmjF14.1070 | <i>L. major</i> | 74   | 243  | 316  |
| LmjF14.1070 | <i>L. major</i> | 51   | 380  | 430  |
| LmjF14.1070 | <i>L. major</i> | 80   | 489  | 568  |
| LmjF14.1070 | <i>L. major</i> | 66   | 803  | 868  |
| LmjF14.1080 | <i>L. major</i> | 46   | 150  | 195  |
| LmjF14.1095 | <i>L. major</i> | 52   | 184  | 235  |
| LmjF14.1095 | <i>L. major</i> | 45   | 295  | 339  |
| LmjF14.1095 | <i>L. major</i> | 45   | 295  | 339  |
| LmjF14.1100 | <i>L. major</i> | 42   | 1    | 42   |
| LmjF14.1100 | <i>L. major</i> | 63   | 244  | 306  |
| LmjF14.1100 | <i>L. major</i> | 232  | 391  | 622  |
| LmjF14.1100 | <i>L. major</i> | 2109 | 657  | 2765 |
| LmjF14.1110 | <i>L. major</i> | 40   | 1    | 40   |
| LmjF14.1110 | <i>L. major</i> | 63   | 214  | 276  |
| LmjF14.1110 | <i>L. major</i> | 219  | 361  | 579  |
| LmjF14.1110 | <i>L. major</i> | 508  | 646  | 1153 |
| LmjF14.1120 | <i>L. major</i> | 63   | 188  | 250  |
| LmjF14.1120 | <i>L. major</i> | 159  | 335  | 493  |
| LmjF14.1120 | <i>L. major</i> | 171  | 554  | 724  |
| LmjF14.1120 | <i>L. major</i> | 2158 | 819  | 2976 |
| LmjF14.1130 | <i>L. major</i> | 204  | 1    | 204  |
| LmjF14.1130 | <i>L. major</i> | 110  | 304  | 413  |
| LmjF14.1130 | <i>L. major</i> | 79   | 663  | 741  |
| LmjF14.1140 | <i>L. major</i> | 54   | 152  | 205  |
| LmjF14.1140 | <i>L. major</i> | 45   | 432  | 476  |
| LmjF14.1140 | <i>L. major</i> | 45   | 432  | 476  |
| LmjF14.1150 | <i>L. major</i> | 64   | 191  | 254  |
| LmjF14.1155 | <i>L. major</i> | 56   | 1    | 56   |
| LmjF14.1155 | <i>L. major</i> | 58   | 117  | 174  |
| LmjF14.1155 | <i>L. major</i> | 128  | 178  | 305  |
| LmjF14.1170 | <i>L. major</i> | 144  | 83   | 226  |
| LmjF14.1170 | <i>L. major</i> | 43   | 281  | 323  |
| LmjF14.1170 | <i>L. major</i> | 147  | 502  | 648  |
| LmjF14.1170 | <i>L. major</i> | 79   | 688  | 766  |
| LmjF14.1180 | <i>L. major</i> | 63   | 432  | 494  |
| LmjF14.1180 | <i>L. major</i> | 139  | 562  | 700  |
| LmjF14.1200 | <i>L. major</i> | 82   | 1    | 82   |
| LmjF14.1210 | <i>L. major</i> | 65   | 85   | 149  |
| LmjF14.1220 | <i>L. major</i> | 151  | 55   | 205  |
| LmjF14.1220 | <i>L. major</i> | 170  | 221  | 390  |
| LmjF14.1220 | <i>L. major</i> | 100  | 420  | 519  |
| LmjF14.1220 | <i>L. major</i> | 168  | 576  | 743  |
| LmjF14.1220 | <i>L. major</i> | 96   | 840  | 935  |

|             |                 |     |      |      |
|-------------|-----------------|-----|------|------|
| LmjF14.1230 | <i>L. major</i> | 48  | 299  | 346  |
| LmjF14.1230 | <i>L. major</i> | 44  | 411  | 454  |
| LmjF14.1230 | <i>L. major</i> | 54  | 488  | 541  |
| LmjF14.1240 | <i>L. major</i> | 74  | 121  | 194  |
| LmjF14.1240 | <i>L. major</i> | 58  | 245  | 302  |
| LmjF14.1270 | <i>L. major</i> | 56  | 66   | 121  |
| LmjF14.1280 | <i>L. major</i> | 40  | 64   | 103  |
| LmjF14.1280 | <i>L. major</i> | 45  | 200  | 244  |
| LmjF14.1280 | <i>L. major</i> | 127 | 287  | 413  |
| LmjF14.1280 | <i>L. major</i> | 51  | 448  | 498  |
| LmjF14.1290 | <i>L. major</i> | 87  | 14   | 100  |
| LmjF14.1290 | <i>L. major</i> | 168 | 252  | 419  |
| LmjF14.1290 | <i>L. major</i> | 369 | 433  | 801  |
| LmjF14.1300 | <i>L. major</i> | 68  | 1    | 68   |
| LmjF14.1300 | <i>L. major</i> | 247 | 381  | 627  |
| LmjF14.1310 | <i>L. major</i> | 193 | 17   | 209  |
| LmjF14.1310 | <i>L. major</i> | 50  | 280  | 329  |
| LmjF14.1310 | <i>L. major</i> | 50  | 280  | 329  |
| LmjF14.1330 | <i>L. major</i> | 165 | 400  | 564  |
| LmjF14.1350 | <i>L. major</i> | 65  | 1    | 65   |
| LmjF14.1350 | <i>L. major</i> | 62  | 109  | 170  |
| LmjF14.1350 | <i>L. major</i> | 48  | 331  | 378  |
| LmjF14.1370 | <i>L. major</i> | 50  | 215  | 264  |
| LmjF14.1380 | <i>L. major</i> | 47  | 271  | 317  |
| LmjF14.1395 | <i>L. major</i> | 41  | 1    | 41   |
| LmjF14.1400 | <i>L. major</i> | 53  | 1    | 53   |
| LmjF14.1400 | <i>L. major</i> | 40  | 56   | 95   |
| LmjF14.1400 | <i>L. major</i> | 53  | 222  | 274  |
| LmjF14.1400 | <i>L. major</i> | 73  | 546  | 618  |
| LmjF14.1400 | <i>L. major</i> | 57  | 901  | 957  |
| LmjF14.1410 | <i>L. major</i> | 265 | 291  | 555  |
| LmjF14.1420 | <i>L. major</i> | 49  | 484  | 532  |
| LmjF14.1430 | <i>L. major</i> | 131 | 761  | 891  |
| LmjF14.1430 | <i>L. major</i> | 122 | 938  | 1059 |
| LmjF14.1430 | <i>L. major</i> | 157 | 1151 | 1307 |
| LmjF14.1430 | <i>L. major</i> | 121 | 1405 | 1525 |
| LmjF14.1430 | <i>L. major</i> | 41  | 1556 | 1596 |
| LmjF14.1440 | <i>L. major</i> | 100 | 1    | 100  |
| LmjF14.1440 | <i>L. major</i> | 397 | 534  | 930  |
| LmjF14.1450 | <i>L. major</i> | 42  | 1    | 42   |
| LmjF14.1470 | <i>L. major</i> | 171 | 25   | 195  |
| LmjF14.1470 | <i>L. major</i> | 65  | 237  | 301  |
| LmjF14.1470 | <i>L. major</i> | 59  | 343  | 401  |
| LmjF14.1470 | <i>L. major</i> | 74  | 411  | 484  |
| LmjF14.1480 | <i>L. major</i> | 40  | 228  | 267  |
| LmjF14.1490 | <i>L. major</i> | 53  | 33   | 85   |
| LmjF14.1490 | <i>L. major</i> | 45  | 727  | 771  |

|             |                 |     |      |      |
|-------------|-----------------|-----|------|------|
| LmjF15.0010 | <i>L. major</i> | 50  | 1    | 50   |
| LmjF15.0050 | <i>L. major</i> | 41  | 1    | 41   |
| LmjF15.0050 | <i>L. major</i> | 42  | 238  | 279  |
| LmjF15.0050 | <i>L. major</i> | 42  | 238  | 279  |
| LmjF15.0060 | <i>L. major</i> | 104 | 1    | 104  |
| LmjF15.0060 | <i>L. major</i> | 67  | 168  | 234  |
| LmjF15.0060 | <i>L. major</i> | 64  | 264  | 327  |
| LmjF15.0060 | <i>L. major</i> | 169 | 430  | 598  |
| LmjF15.0070 | <i>L. major</i> | 146 | 111  | 256  |
| LmjF15.0070 | <i>L. major</i> | 138 | 331  | 468  |
| LmjF15.0080 | <i>L. major</i> | 96  | 190  | 285  |
| LmjF15.0090 | <i>L. major</i> | 45  | 106  | 150  |
| LmjF15.0090 | <i>L. major</i> | 45  | 155  | 199  |
| LmjF15.0090 | <i>L. major</i> | 45  | 155  | 199  |
| LmjF15.0110 | <i>L. major</i> | 56  | 196  | 251  |
| LmjF15.0110 | <i>L. major</i> | 61  | 324  | 384  |
| LmjF15.0110 | <i>L. major</i> | 60  | 653  | 712  |
| LmjF15.0130 | <i>L. major</i> | 62  | 241  | 302  |
| LmjF15.0130 | <i>L. major</i> | 169 | 480  | 648  |
| LmjF15.0140 | <i>L. major</i> | 141 | 41   | 181  |
| LmjF15.0160 | <i>L. major</i> | 230 | 1    | 230  |
| LmjF15.0160 | <i>L. major</i> | 304 | 236  | 539  |
| LmjF15.0160 | <i>L. major</i> | 67  | 592  | 658  |
| LmjF15.0160 | <i>L. major</i> | 61  | 660  | 720  |
| LmjF15.0170 | <i>L. major</i> | 131 | 1    | 131  |
| LmjF15.0180 | <i>L. major</i> | 78  | 1    | 78   |
| LmjF15.0180 | <i>L. major</i> | 93  | 429  | 521  |
| LmjF15.0185 | <i>L. major</i> | 184 | 1    | 184  |
| LmjF15.0185 | <i>L. major</i> | 386 | 201  | 586  |
| LmjF15.0195 | <i>L. major</i> | 74  | 94   | 167  |
| LmjF15.0195 | <i>L. major</i> | 40  | 228  | 267  |
| LmjF15.0195 | <i>L. major</i> | 40  | 228  | 267  |
| LmjF15.0200 | <i>L. major</i> | 46  | 177  | 222  |
| LmjF15.0210 | <i>L. major</i> | 82  | 211  | 292  |
| LmjF15.0210 | <i>L. major</i> | 108 | 352  | 459  |
| LmjF15.0223 | <i>L. major</i> | 59  | 157  | 215  |
| LmjF15.0230 | <i>L. major</i> | 64  | 1    | 64   |
| LmjF15.0250 | <i>L. major</i> | 176 | 1    | 176  |
| LmjF15.0250 | <i>L. major</i> | 95  | 253  | 347  |
| LmjF15.0250 | <i>L. major</i> | 65  | 409  | 473  |
| LmjF15.0250 | <i>L. major</i> | 83  | 506  | 588  |
| LmjF15.0250 | <i>L. major</i> | 45  | 604  | 648  |
| LmjF15.0250 | <i>L. major</i> | 88  | 655  | 742  |
| LmjF15.0250 | <i>L. major</i> | 138 | 774  | 911  |
| LmjF15.0250 | <i>L. major</i> | 62  | 935  | 996  |
| LmjF15.0250 | <i>L. major</i> | 43  | 1101 | 1143 |
| LmjF15.0250 | <i>L. major</i> | 44  | 1355 | 1398 |

|             |                 |     |      |      |
|-------------|-----------------|-----|------|------|
| LmjF15.0250 | <i>L. major</i> | 58  | 1551 | 1608 |
| LmjF15.0260 | <i>L. major</i> | 177 | 44   | 220  |
| LmjF15.0260 | <i>L. major</i> | 82  | 268  | 349  |
| LmjF15.0260 | <i>L. major</i> | 89  | 381  | 469  |
| LmjF15.0290 | <i>L. major</i> | 67  | 50   | 116  |
| LmjF15.0290 | <i>L. major</i> | 217 | 584  | 800  |
| LmjF15.0310 | <i>L. major</i> | 64  | 30   | 93   |
| LmjF15.0310 | <i>L. major</i> | 104 | 105  | 208  |
| LmjF15.0310 | <i>L. major</i> | 132 | 234  | 365  |
| LmjF15.0310 | <i>L. major</i> | 236 | 393  | 628  |
| LmjF15.0320 | <i>L. major</i> | 71  | 120  | 190  |
| LmjF15.0320 | <i>L. major</i> | 56  | 231  | 286  |
| LmjF15.0320 | <i>L. major</i> | 44  | 311  | 354  |
| LmjF15.0320 | <i>L. major</i> | 60  | 649  | 708  |
| LmjF15.0320 | <i>L. major</i> | 46  | 716  | 761  |
| LmjF15.0330 | <i>L. major</i> | 412 | 83   | 494  |
| LmjF15.0330 | <i>L. major</i> | 85  | 737  | 821  |
| LmjF15.0330 | <i>L. major</i> | 42  | 863  | 904  |
| LmjF15.0330 | <i>L. major</i> | 45  | 948  | 992  |
| LmjF15.0340 | <i>L. major</i> | 173 | 1    | 173  |
| LmjF15.0340 | <i>L. major</i> | 112 | 207  | 318  |
| LmjF15.0340 | <i>L. major</i> | 100 | 321  | 420  |
| LmjF15.0350 | <i>L. major</i> | 63  | 257  | 319  |
| LmjF15.0360 | <i>L. major</i> | 64  | 246  | 309  |
| LmjF15.0360 | <i>L. major</i> | 102 | 526  | 627  |
| LmjF15.0360 | <i>L. major</i> | 109 | 663  | 771  |
| LmjF15.0360 | <i>L. major</i> | 98  | 803  | 900  |
| LmjF15.0360 | <i>L. major</i> | 58  | 959  | 1016 |
| LmjF15.0370 | <i>L. major</i> | 51  | 58   | 108  |
| LmjF15.0380 | <i>L. major</i> | 51  | 58   | 108  |
| LmjF15.0400 | <i>L. major</i> | 52  | 34   | 85   |
| LmjF15.0400 | <i>L. major</i> | 46  | 205  | 250  |
| LmjF15.0400 | <i>L. major</i> | 59  | 280  | 338  |
| LmjF15.0400 | <i>L. major</i> | 90  | 375  | 464  |
| LmjF15.0410 | <i>L. major</i> | 77  | 403  | 479  |
| LmjF15.0420 | <i>L. major</i> | 50  | 1    | 50   |
| LmjF15.0430 | <i>L. major</i> | 70  | 46   | 115  |
| LmjF15.0430 | <i>L. major</i> | 105 | 184  | 288  |
| LmjF15.0490 | <i>L. major</i> | 395 | 1    | 395  |
| LmjF15.0490 | <i>L. major</i> | 52  | 590  | 641  |
| LmjF15.0500 | <i>L. major</i> | 111 | 1    | 111  |
| LmjF15.0500 | <i>L. major</i> | 441 | 202  | 642  |
| LmjF15.0500 | <i>L. major</i> | 94  | 823  | 916  |
| LmjF15.0520 | <i>L. major</i> | 245 | 137  | 381  |
| LmjF15.0530 | <i>L. major</i> | 562 | 1    | 562  |
| LmjF15.0530 | <i>L. major</i> | 68  | 643  | 710  |
| LmjF15.0530 | <i>L. major</i> | 212 | 748  | 959  |

|             |                 |     |      |      |
|-------------|-----------------|-----|------|------|
| LmjF15.0530 | <i>L. major</i> | 243 | 1019 | 1261 |
| LmjF15.0530 | <i>L. major</i> | 48  | 1604 | 1651 |
| LmjF15.0530 | <i>L. major</i> | 45  | 1685 | 1729 |
| LmjF15.0540 | <i>L. major</i> | 58  | 1    | 58   |
| LmjF15.0540 | <i>L. major</i> | 123 | 192  | 314  |
| LmjF15.0540 | <i>L. major</i> | 136 | 319  | 454  |
| LmjF15.0540 | <i>L. major</i> | 123 | 557  | 679  |
| LmjF15.0550 | <i>L. major</i> | 42  | 1    | 42   |
| LmjF15.0550 | <i>L. major</i> | 79  | 120  | 198  |
| LmjF15.0550 | <i>L. major</i> | 48  | 214  | 261  |
| LmjF15.0550 | <i>L. major</i> | 60  | 389  | 448  |
| LmjF15.0550 | <i>L. major</i> | 220 | 603  | 822  |
| LmjF15.0550 | <i>L. major</i> | 107 | 857  | 963  |
| LmjF15.0550 | <i>L. major</i> | 103 | 990  | 1092 |
| LmjF15.0550 | <i>L. major</i> | 121 | 1137 | 1257 |
| LmjF15.0550 | <i>L. major</i> | 114 | 1344 | 1457 |
| LmjF15.0550 | <i>L. major</i> | 114 | 1613 | 1726 |
| LmjF15.0560 | <i>L. major</i> | 111 | 1    | 111  |
| LmjF15.0560 | <i>L. major</i> | 216 | 125  | 340  |
| LmjF15.0560 | <i>L. major</i> | 83  | 366  | 448  |
| LmjF15.0560 | <i>L. major</i> | 69  | 474  | 542  |
| LmjF15.0570 | <i>L. major</i> | 74  | 97   | 170  |
| LmjF15.0580 | <i>L. major</i> | 42  | 76   | 117  |
| LmjF15.0580 | <i>L. major</i> | 46  | 187  | 232  |
| LmjF15.0580 | <i>L. major</i> | 46  | 187  | 232  |
| LmjF15.0590 | <i>L. major</i> | 118 | 40   | 157  |
| LmjF15.0590 | <i>L. major</i> | 59  | 167  | 225  |
| LmjF15.0600 | <i>L. major</i> | 109 | 17   | 125  |
| LmjF15.0600 | <i>L. major</i> | 46  | 144  | 189  |
| LmjF15.0600 | <i>L. major</i> | 333 | 221  | 553  |
| LmjF15.0600 | <i>L. major</i> | 434 | 723  | 1156 |
| LmjF15.0610 | <i>L. major</i> | 40  | 375  | 414  |
| LmjF15.0620 | <i>L. major</i> | 44  | 1    | 44   |
| LmjF15.0620 | <i>L. major</i> | 95  | 258  | 352  |
| LmjF15.0630 | <i>L. major</i> | 489 | 51   | 539  |
| LmjF15.0630 | <i>L. major</i> | 506 | 550  | 1055 |
| LmjF15.0630 | <i>L. major</i> | 173 | 1098 | 1270 |
| LmjF15.0640 | <i>L. major</i> | 190 | 74   | 263  |
| LmjF15.0640 | <i>L. major</i> | 103 | 300  | 402  |
| LmjF15.0640 | <i>L. major</i> | 105 | 806  | 910  |
| LmjF15.0640 | <i>L. major</i> | 80  | 963  | 1042 |
| LmjF15.0640 | <i>L. major</i> | 75  | 1108 | 1182 |
| LmjF15.0640 | <i>L. major</i> | 172 | 1201 | 1372 |
| LmjF15.0650 | <i>L. major</i> | 391 | 1    | 391  |
| LmjF15.0650 | <i>L. major</i> | 139 | 501  | 639  |
| LmjF15.0660 | <i>L. major</i> | 176 | 1    | 176  |
| LmjF15.0660 | <i>L. major</i> | 57  | 216  | 272  |

|             |                 |     |      |      |
|-------------|-----------------|-----|------|------|
| LmjF15.0660 | <i>L. major</i> | 176 | 286  | 461  |
| LmjF15.0670 | <i>L. major</i> | 112 | 1    | 112  |
| LmjF15.0670 | <i>L. major</i> | 66  | 121  | 186  |
| LmjF15.0670 | <i>L. major</i> | 62  | 225  | 286  |
| LmjF15.0670 | <i>L. major</i> | 43  | 410  | 452  |
| LmjF15.0670 | <i>L. major</i> | 41  | 686  | 726  |
| LmjF15.0670 | <i>L. major</i> | 81  | 795  | 875  |
| LmjF15.0680 | <i>L. major</i> | 59  | 1    | 59   |
| LmjF15.0680 | <i>L. major</i> | 43  | 159  | 201  |
| LmjF15.0680 | <i>L. major</i> | 43  | 159  | 201  |
| LmjF15.0700 | <i>L. major</i> | 45  | 1    | 45   |
| LmjF15.0700 | <i>L. major</i> | 96  | 162  | 257  |
| LmjF15.0700 | <i>L. major</i> | 63  | 281  | 343  |
| LmjF15.0700 | <i>L. major</i> | 103 | 386  | 488  |
| LmjF15.0700 | <i>L. major</i> | 151 | 545  | 695  |
| LmjF15.0700 | <i>L. major</i> | 61  | 771  | 831  |
| LmjF15.0700 | <i>L. major</i> | 50  | 955  | 1004 |
| LmjF15.0710 | <i>L. major</i> | 82  | 72   | 153  |
| LmjF15.0710 | <i>L. major</i> | 58  | 206  | 263  |
| LmjF15.0710 | <i>L. major</i> | 54  | 382  | 435  |
| LmjF15.0710 | <i>L. major</i> | 59  | 743  | 801  |
| LmjF15.0710 | <i>L. major</i> | 48  | 867  | 914  |
| LmjF15.0710 | <i>L. major</i> | 66  | 1124 | 1189 |
| LmjF15.0710 | <i>L. major</i> | 45  | 1220 | 1264 |
| LmjF15.0710 | <i>L. major</i> | 230 | 1915 | 2144 |
| LmjF15.0710 | <i>L. major</i> | 68  | 2177 | 2244 |
| LmjF15.0710 | <i>L. major</i> | 41  | 2624 | 2664 |
| LmjF15.0720 | <i>L. major</i> | 96  | 91   | 186  |
| LmjF15.0720 | <i>L. major</i> | 49  | 302  | 350  |
| LmjF15.0730 | <i>L. major</i> | 61  | 1    | 61   |
| LmjF15.0730 | <i>L. major</i> | 72  | 86   | 157  |
| LmjF15.0730 | <i>L. major</i> | 72  | 86   | 157  |
| LmjF15.0750 | <i>L. major</i> | 341 | 1    | 341  |
| LmjF15.0750 | <i>L. major</i> | 119 | 348  | 466  |
| LmjF15.0750 | <i>L. major</i> | 91  | 587  | 677  |
| LmjF15.0760 | <i>L. major</i> | 133 | 1    | 133  |
| LmjF15.0760 | <i>L. major</i> | 66  | 740  | 805  |
| LmjF15.0760 | <i>L. major</i> | 265 | 1147 | 1411 |
| LmjF15.0760 | <i>L. major</i> | 70  | 1890 | 1959 |
| LmjF15.0760 | <i>L. major</i> | 163 | 1969 | 2131 |
| LmjF15.0760 | <i>L. major</i> | 67  | 2368 | 2434 |
| LmjF15.0760 | <i>L. major</i> | 131 | 2561 | 2691 |
| LmjF15.0770 | <i>L. major</i> | 92  | 363  | 454  |
| LmjF15.0770 | <i>L. major</i> | 210 | 457  | 666  |
| LmjF15.0780 | <i>L. major</i> | 85  | 571  | 655  |
| LmjF15.0790 | <i>L. major</i> | 62  | 75   | 136  |
| LmjF15.0790 | <i>L. major</i> | 113 | 353  | 465  |

|             |                 |     |      |      |
|-------------|-----------------|-----|------|------|
| LmjF15.0790 | <i>L. major</i> | 60  | 852  | 911  |
| LmjF15.0790 | <i>L. major</i> | 45  | 1005 | 1049 |
| LmjF15.0790 | <i>L. major</i> | 65  | 1134 | 1198 |
| LmjF15.0790 | <i>L. major</i> | 54  | 1258 | 1311 |
| LmjF15.0800 | <i>L. major</i> | 287 | 1    | 287  |
| LmjF15.0800 | <i>L. major</i> | 132 | 306  | 437  |
| LmjF15.0800 | <i>L. major</i> | 125 | 517  | 641  |
| LmjF15.0800 | <i>L. major</i> | 445 | 661  | 1105 |
| LmjF15.0800 | <i>L. major</i> | 199 | 1112 | 1310 |
| LmjF15.0800 | <i>L. major</i> | 55  | 1318 | 1372 |
| LmjF15.0800 | <i>L. major</i> | 294 | 1384 | 1677 |
| LmjF15.0800 | <i>L. major</i> | 88  | 1712 | 1799 |
| LmjF15.0800 | <i>L. major</i> | 137 | 1865 | 2001 |
| LmjF15.0800 | <i>L. major</i> | 77  | 2007 | 2083 |
| LmjF15.0810 | <i>L. major</i> | 49  | 337  | 385  |
| LmjF15.0810 | <i>L. major</i> | 41  | 452  | 492  |
| LmjF15.0810 | <i>L. major</i> | 41  | 452  | 492  |
| LmjF15.0820 | <i>L. major</i> | 41  | 913  | 953  |
| LmjF15.0825 | <i>L. major</i> | 109 | 1    | 109  |
| LmjF15.0825 | <i>L. major</i> | 46  | 121  | 166  |
| LmjF15.0825 | <i>L. major</i> | 73  | 174  | 246  |
| LmjF15.0825 | <i>L. major</i> | 46  | 251  | 296  |
| LmjF15.0830 | <i>L. major</i> | 97  | 1    | 97   |
| LmjF15.0830 | <i>L. major</i> | 250 | 169  | 418  |
| LmjF15.0830 | <i>L. major</i> | 373 | 432  | 804  |
| LmjF15.0850 | <i>L. major</i> | 168 | 15   | 182  |
| LmjF15.0850 | <i>L. major</i> | 69  | 218  | 286  |
| LmjF15.0850 | <i>L. major</i> | 42  | 452  | 493  |
| LmjF15.0850 | <i>L. major</i> | 66  | 507  | 572  |
| LmjF15.0860 | <i>L. major</i> | 271 | 39   | 309  |
| LmjF15.0870 | <i>L. major</i> | 46  | 260  | 305  |
| LmjF15.0870 | <i>L. major</i> | 67  | 331  | 397  |
| LmjF15.0870 | <i>L. major</i> | 67  | 331  | 397  |
| LmjF15.0880 | <i>L. major</i> | 89  | 193  | 281  |
| LmjF15.0890 | <i>L. major</i> | 85  | 657  | 741  |
| LmjF15.0900 | <i>L. major</i> | 70  | 1    | 70   |
| LmjF15.0900 | <i>L. major</i> | 65  | 160  | 224  |
| LmjF15.0900 | <i>L. major</i> | 65  | 160  | 224  |
| LmjF15.0910 | <i>L. major</i> | 105 | 56   | 160  |
| LmjF15.0910 | <i>L. major</i> | 45  | 199  | 243  |
| LmjF15.0910 | <i>L. major</i> | 199 | 290  | 488  |
| LmjF15.0910 | <i>L. major</i> | 168 | 512  | 679  |
| LmjF15.0910 | <i>L. major</i> | 51  | 706  | 756  |
| LmjF15.0910 | <i>L. major</i> | 122 | 837  | 958  |
| LmjF15.0910 | <i>L. major</i> | 103 | 1254 | 1356 |
| LmjF15.0910 | <i>L. major</i> | 306 | 1359 | 1664 |
| LmjF15.0910 | <i>L. major</i> | 41  | 1706 | 1746 |



|             |                 |     |      |      |
|-------------|-----------------|-----|------|------|
| LmjF15.0910 | <i>L. major</i> | 85  | 1786 | 1870 |
| LmjF15.0910 | <i>L. major</i> | 101 | 1998 | 2098 |
| LmjF15.0910 | <i>L. major</i> | 119 | 2152 | 2270 |
| LmjF15.0910 | <i>L. major</i> | 61  | 2444 | 2504 |
| LmjF15.0920 | <i>L. major</i> | 129 | 1    | 129  |
| LmjF15.0920 | <i>L. major</i> | 78  | 533  | 610  |
| LmjF15.0940 | <i>L. major</i> | 118 | 119  | 236  |
| LmjF15.0940 | <i>L. major</i> | 171 | 332  | 502  |
| LmjF15.0940 | <i>L. major</i> | 89  | 530  | 618  |
| LmjF15.0940 | <i>L. major</i> | 62  | 646  | 707  |
| LmjF15.0940 | <i>L. major</i> | 68  | 785  | 852  |
| LmjF15.0940 | <i>L. major</i> | 41  | 889  | 929  |
| LmjF15.0940 | <i>L. major</i> | 250 | 948  | 1197 |
| LmjF15.0960 | <i>L. major</i> | 67  | 123  | 189  |
| LmjF15.0960 | <i>L. major</i> | 86  | 203  | 288  |
| LmjF15.0970 | <i>L. major</i> | 119 | 278  | 396  |
| LmjF15.0980 | <i>L. major</i> | 90  | 14   | 103  |
| LmjF15.0980 | <i>L. major</i> | 150 | 319  | 468  |
| LmjF15.0980 | <i>L. major</i> | 215 | 569  | 783  |
| LmjF15.0990 | <i>L. major</i> | 41  | 157  | 197  |
| LmjF15.1000 | <i>L. major</i> | 70  | 93   | 162  |
| LmjF15.1010 | <i>L. major</i> | 48  | 1    | 48   |
| LmjF15.1010 | <i>L. major</i> | 53  | 661  | 713  |
| LmjF15.1010 | <i>L. major</i> | 53  | 661  | 713  |
| LmjF15.1020 | <i>L. major</i> | 51  | 309  | 359  |
| LmjF15.1030 | <i>L. major</i> | 132 | 1    | 132  |
| LmjF15.1030 | <i>L. major</i> | 263 | 165  | 427  |
| LmjF15.1050 | <i>L. major</i> | 55  | 62   | 116  |
| LmjF15.1070 | <i>L. major</i> | 55  | 62   | 116  |
| LmjF15.1090 | <i>L. major</i> | 55  | 62   | 116  |
| LmjF15.1110 | <i>L. major</i> | 55  | 62   | 116  |
| LmjF15.1130 | <i>L. major</i> | 55  | 62   | 116  |
| LmjF15.1150 | <i>L. major</i> | 55  | 62   | 116  |
| LmjF15.1170 | <i>L. major</i> | 52  | 67   | 118  |
| LmjF15.1170 | <i>L. major</i> | 52  | 290  | 341  |
| LmjF15.1170 | <i>L. major</i> | 62  | 367  | 428  |
| LmjF15.1180 | <i>L. major</i> | 59  | 213  | 271  |
| LmjF15.1180 | <i>L. major</i> | 43  | 364  | 406  |
| LmjF15.1180 | <i>L. major</i> | 80  | 442  | 521  |
| LmjF15.1180 | <i>L. major</i> | 44  | 723  | 766  |
| LmjF15.1180 | <i>L. major</i> | 61  | 986  | 1046 |
| LmjF15.1180 | <i>L. major</i> | 63  | 1078 | 1140 |
| LmjF15.1180 | <i>L. major</i> | 40  | 1406 | 1445 |
| LmjF15.1180 | <i>L. major</i> | 185 | 1663 | 1847 |
| LmjF15.1180 | <i>L. major</i> | 71  | 2211 | 2281 |
| LmjF15.1180 | <i>L. major</i> | 210 | 2438 | 2647 |
| LmjF15.1180 | <i>L. major</i> | 499 | 2669 | 3167 |

|             |                 |     |      |      |
|-------------|-----------------|-----|------|------|
| LmjF15.1190 | <i>L. major</i> | 269 | 42   | 310  |
| LmjF15.1190 | <i>L. major</i> | 56  | 400  | 455  |
| LmjF15.1190 | <i>L. major</i> | 108 | 936  | 1043 |
| LmjF15.1200 | <i>L. major</i> | 103 | 1    | 103  |
| LmjF15.1200 | <i>L. major</i> | 240 | 137  | 376  |
| LmjF15.1200 | <i>L. major</i> | 91  | 610  | 700  |
| LmjF15.1200 | <i>L. major</i> | 73  | 991  | 1063 |
| LmjF15.1200 | <i>L. major</i> | 82  | 1067 | 1148 |
| LmjF15.1200 | <i>L. major</i> | 411 | 1596 | 2006 |
| LmjF15.1200 | <i>L. major</i> | 252 | 2050 | 2301 |
| LmjF15.1200 | <i>L. major</i> | 136 | 2327 | 2462 |
| LmjF15.1200 | <i>L. major</i> | 168 | 2483 | 2650 |
| LmjF15.1203 | <i>L. major</i> | 53  | 59   | 111  |
| LmjF15.1207 | <i>L. major</i> | 53  | 59   | 111  |
| LmjF15.1210 | <i>L. major</i> | 98  | 354  | 451  |
| LmjF15.1220 | <i>L. major</i> | 111 | 15   | 125  |
| LmjF15.1220 | <i>L. major</i> | 65  | 414  | 478  |
| LmjF15.1230 | <i>L. major</i> | 57  | 1    | 57   |
| LmjF15.1230 | <i>L. major</i> | 51  | 85   | 135  |
| LmjF15.1230 | <i>L. major</i> | 69  | 410  | 478  |
| LmjF15.1240 | <i>L. major</i> | 69  | 245  | 313  |
| LmjF15.1260 | <i>L. major</i> | 47  | 44   | 90   |
| LmjF15.1260 | <i>L. major</i> | 71  | 337  | 407  |
| LmjF15.1260 | <i>L. major</i> | 71  | 337  | 407  |
| LmjF15.1270 | <i>L. major</i> | 50  | 1    | 50   |
| LmjF15.1270 | <i>L. major</i> | 89  | 252  | 340  |
| LmjF15.1270 | <i>L. major</i> | 76  | 458  | 533  |
| LmjF15.1280 | <i>L. major</i> | 87  | 67   | 153  |
| LmjF15.1280 | <i>L. major</i> | 102 | 200  | 301  |
| LmjF15.1280 | <i>L. major</i> | 251 | 395  | 645  |
| LmjF15.1280 | <i>L. major</i> | 365 | 676  | 1040 |
| LmjF15.1280 | <i>L. major</i> | 79  | 1067 | 1145 |
| LmjF15.1280 | <i>L. major</i> | 69  | 1189 | 1257 |
| LmjF15.1280 | <i>L. major</i> | 180 | 1369 | 1548 |
| LmjF15.1280 | <i>L. major</i> | 49  | 1594 | 1642 |
| LmjF15.1280 | <i>L. major</i> | 131 | 1659 | 1789 |
| LmjF15.1290 | <i>L. major</i> | 44  | 390  | 433  |
| LmjF15.1290 | <i>L. major</i> | 65  | 1149 | 1213 |
| LmjF15.1290 | <i>L. major</i> | 65  | 1149 | 1213 |
| LmjF15.1300 | <i>L. major</i> | 110 | 1    | 110  |
| LmjF15.1300 | <i>L. major</i> | 148 | 900  | 1047 |
| LmjF15.1310 | <i>L. major</i> | 77  | 1    | 77   |
| LmjF15.1310 | <i>L. major</i> | 127 | 93   | 219  |
| LmjF15.1310 | <i>L. major</i> | 98  | 251  | 348  |
| LmjF15.1310 | <i>L. major</i> | 69  | 413  | 481  |
| LmjF15.1320 | <i>L. major</i> | 41  | 1    | 41   |
| LmjF15.1320 | <i>L. major</i> | 227 | 63   | 289  |

|             |                 |     |      |      |
|-------------|-----------------|-----|------|------|
| LmjF15.1320 | <i>L. major</i> | 70  | 340  | 409  |
| LmjF15.1320 | <i>L. major</i> | 116 | 705  | 820  |
| LmjF15.1320 | <i>L. major</i> | 253 | 1173 | 1425 |
| LmjF15.1330 | <i>L. major</i> | 51  | 240  | 290  |
| LmjF15.1340 | <i>L. major</i> | 87  | 152  | 238  |
| LmjF15.1345 | <i>L. major</i> | 67  | 1    | 67   |
| LmjF15.1345 | <i>L. major</i> | 221 | 83   | 303  |
| LmjF15.1350 | <i>L. major</i> | 51  | 1    | 51   |
| LmjF15.1350 | <i>L. major</i> | 86  | 86   | 171  |
| LmjF15.1355 | <i>L. major</i> | 47  | 150  | 196  |
| LmjF15.1380 | <i>L. major</i> | 83  | 1    | 83   |
| LmjF15.1380 | <i>L. major</i> | 74  | 529  | 602  |
| LmjF15.1400 | <i>L. major</i> | 83  | 213  | 295  |
| LmjF15.1410 | <i>L. major</i> | 140 | 339  | 478  |
| LmjF15.1420 | <i>L. major</i> | 68  | 141  | 208  |
| LmjF15.1440 | <i>L. major</i> | 49  | 1    | 49   |
| LmjF15.1450 | <i>L. major</i> | 59  | 166  | 224  |
| LmjF15.1480 | <i>L. major</i> | 54  | 39   | 92   |
| LmjF15.1490 | <i>L. major</i> | 48  | 1    | 48   |
| LmjF15.1490 | <i>L. major</i> | 69  | 113  | 181  |
| LmjF15.1490 | <i>L. major</i> | 264 | 381  | 644  |
| LmjF15.1500 | <i>L. major</i> | 41  | 138  | 178  |
| LmjF15.1510 | <i>L. major</i> | 41  | 1    | 41   |
| LmjF15.1520 | <i>L. major</i> | 53  | 57   | 109  |
| LmjF15.1540 | <i>L. major</i> | 49  | 368  | 416  |
| LmjF15.1545 | <i>L. major</i> | 54  | 1    | 54   |
| LmjF15.1545 | <i>L. major</i> | 74  | 149  | 222  |
| LmjF15.1545 | <i>L. major</i> | 74  | 149  | 222  |
| LmjF15.1560 | <i>L. major</i> | 40  | 153  | 192  |
| LmjF15.1560 | <i>L. major</i> | 49  | 505  | 553  |
| LmjF15.1560 | <i>L. major</i> | 56  | 870  | 925  |
| LmjF15.1560 | <i>L. major</i> | 47  | 1210 | 1256 |
| LmjF15.1570 | <i>L. major</i> | 119 | 305  | 423  |
| LmjF15.1570 | <i>L. major</i> | 58  | 486  | 543  |
| LmjF16.0005 | <i>L. major</i> | 43  | 184  | 226  |
| LmjF16.0050 | <i>L. major</i> | 61  | 181  | 241  |
| LmjF16.0050 | <i>L. major</i> | 48  | 536  | 583  |
| LmjF16.0060 | <i>L. major</i> | 76  | 884  | 959  |
| LmjF16.0070 | <i>L. major</i> | 110 | 1    | 110  |
| LmjF16.0080 | <i>L. major</i> | 75  | 1    | 75   |
| LmjF16.0080 | <i>L. major</i> | 66  | 381  | 446  |
| LmjF16.0080 | <i>L. major</i> | 84  | 508  | 591  |
| LmjF16.0080 | <i>L. major</i> | 116 | 621  | 736  |
| LmjF16.0100 | <i>L. major</i> | 63  | 167  | 229  |
| LmjF16.0120 | <i>L. major</i> | 51  | 1    | 51   |
| LmjF16.0120 | <i>L. major</i> | 49  | 417  | 465  |
| LmjF16.0130 | <i>L. major</i> | 126 | 60   | 185  |

|             |                 |     |      |      |
|-------------|-----------------|-----|------|------|
| LmjF16.0140 | <i>L. major</i> | 40  | 1    | 40   |
| LmjF16.0140 | <i>L. major</i> | 53  | 116  | 168  |
| LmjF16.0140 | <i>L. major</i> | 53  | 116  | 168  |
| LmjF16.0150 | <i>L. major</i> | 150 | 85   | 234  |
| LmjF16.0160 | <i>L. major</i> | 41  | 1    | 41   |
| LmjF16.0160 | <i>L. major</i> | 58  | 248  | 305  |
| LmjF16.0160 | <i>L. major</i> | 58  | 248  | 305  |
| LmjF16.0170 | <i>L. major</i> | 92  | 144  | 235  |
| LmjF16.0170 | <i>L. major</i> | 57  | 301  | 357  |
| LmjF16.0170 | <i>L. major</i> | 112 | 1156 | 1267 |
| LmjF16.0170 | <i>L. major</i> | 71  | 1283 | 1353 |
| LmjF16.0170 | <i>L. major</i> | 303 | 1513 | 1815 |
| LmjF16.0170 | <i>L. major</i> | 51  | 1924 | 1974 |
| LmjF16.0170 | <i>L. major</i> | 63  | 2395 | 2457 |
| LmjF16.0170 | <i>L. major</i> | 43  | 2566 | 2608 |
| LmjF16.0170 | <i>L. major</i> | 113 | 2729 | 2841 |
| LmjF16.0170 | <i>L. major</i> | 48  | 2904 | 2951 |
| LmjF16.0170 | <i>L. major</i> | 62  | 3041 | 3102 |
| LmjF16.0170 | <i>L. major</i> | 73  | 3333 | 3405 |
| LmjF16.0170 | <i>L. major</i> | 81  | 3441 | 3521 |
| LmjF16.0170 | <i>L. major</i> | 68  | 4267 | 4334 |
| LmjF16.0170 | <i>L. major</i> | 47  | 4389 | 4435 |
| LmjF16.0180 | <i>L. major</i> | 158 | 1    | 158  |
| LmjF16.0190 | <i>L. major</i> | 82  | 1    | 82   |
| LmjF16.0190 | <i>L. major</i> | 119 | 247  | 365  |
| LmjF16.0210 | <i>L. major</i> | 55  | 110  | 164  |
| LmjF16.0210 | <i>L. major</i> | 45  | 339  | 383  |
| LmjF16.0220 | <i>L. major</i> | 51  | 81   | 131  |
| LmjF16.0240 | <i>L. major</i> | 65  | 1    | 65   |
| LmjF16.0240 | <i>L. major</i> | 53  | 115  | 167  |
| LmjF16.0240 | <i>L. major</i> | 43  | 662  | 704  |
| LmjF16.0260 | <i>L. major</i> | 64  | 68   | 131  |
| LmjF16.0270 | <i>L. major</i> | 57  | 47   | 103  |
| LmjF16.0270 | <i>L. major</i> | 96  | 149  | 244  |
| LmjF16.0270 | <i>L. major</i> | 40  | 302  | 341  |
| LmjF16.0270 | <i>L. major</i> | 65  | 399  | 463  |
| LmjF16.0270 | <i>L. major</i> | 41  | 962  | 1002 |
| LmjF16.0280 | <i>L. major</i> | 53  | 451  | 503  |
| LmjF16.0280 | <i>L. major</i> | 86  | 785  | 870  |
| LmjF16.0280 | <i>L. major</i> | 47  | 1152 | 1198 |
| LmjF16.0280 | <i>L. major</i> | 53  | 2132 | 2184 |
| LmjF16.0280 | <i>L. major</i> | 63  | 2777 | 2839 |
| LmjF16.0290 | <i>L. major</i> | 70  | 87   | 156  |
| LmjF16.0300 | <i>L. major</i> | 140 | 258  | 397  |
| LmjF16.0300 | <i>L. major</i> | 101 | 404  | 504  |
| LmjF16.0300 | <i>L. major</i> | 101 | 404  | 504  |
| LmjF16.0310 | <i>L. major</i> | 62  | 87   | 148  |

|             |                 |     |      |      |
|-------------|-----------------|-----|------|------|
| LmjF16.0310 | <i>L. major</i> | 64  | 186  | 249  |
| LmjF16.0320 | <i>L. major</i> | 739 | 380  | 1118 |
| LmjF16.0330 | <i>L. major</i> | 41  | 23   | 63   |
| LmjF16.0330 | <i>L. major</i> | 50  | 142  | 191  |
| LmjF16.0330 | <i>L. major</i> | 50  | 142  | 191  |
| LmjF16.0350 | <i>L. major</i> | 50  | 1    | 50   |
| LmjF16.0360 | <i>L. major</i> | 128 | 123  | 250  |
| LmjF16.0360 | <i>L. major</i> | 128 | 402  | 529  |
| LmjF16.0360 | <i>L. major</i> | 119 | 549  | 667  |
| LmjF16.0370 | <i>L. major</i> | 137 | 62   | 198  |
| LmjF16.0380 | <i>L. major</i> | 191 | 1    | 191  |
| LmjF16.0380 | <i>L. major</i> | 55  | 196  | 250  |
| LmjF16.0380 | <i>L. major</i> | 60  | 262  | 321  |
| LmjF16.0380 | <i>L. major</i> | 89  | 506  | 594  |
| LmjF16.0390 | <i>L. major</i> | 59  | 42   | 100  |
| LmjF16.0390 | <i>L. major</i> | 51  | 251  | 301  |
| LmjF16.0390 | <i>L. major</i> | 333 | 653  | 985  |
| LmjF16.0400 | <i>L. major</i> | 44  | 107  | 150  |
| LmjF16.0410 | <i>L. major</i> | 237 | 339  | 575  |
| LmjF16.0420 | <i>L. major</i> | 65  | 1    | 65   |
| LmjF16.0430 | <i>L. major</i> | 187 | 1    | 187  |
| LmjF16.0440 | <i>L. major</i> | 50  | 746  | 795  |
| LmjF16.0480 | <i>L. major</i> | 50  | 746  | 795  |
| LmjF16.0510 | <i>L. major</i> | 40  | 39   | 78   |
| LmjF16.0510 | <i>L. major</i> | 87  | 146  | 232  |
| LmjF16.0510 | <i>L. major</i> | 96  | 295  | 390  |
| LmjF16.0510 | <i>L. major</i> | 362 | 463  | 824  |
| LmjF16.0520 | <i>L. major</i> | 43  | 286  | 328  |
| LmjF16.0560 | <i>L. major</i> | 107 | 144  | 250  |
| LmjF16.0560 | <i>L. major</i> | 90  | 374  | 463  |
| LmjF16.0560 | <i>L. major</i> | 97  | 514  | 610  |
| LmjF16.0570 | <i>L. major</i> | 49  | 1    | 49   |
| LmjF16.0575 | <i>L. major</i> | 49  | 1    | 49   |
| LmjF16.0580 | <i>L. major</i> | 55  | 158  | 212  |
| LmjF16.0600 | <i>L. major</i> | 49  | 1    | 49   |
| LmjF16.0610 | <i>L. major</i> | 49  | 1    | 49   |
| LmjF16.0620 | <i>L. major</i> | 225 | 55   | 279  |
| LmjF16.0620 | <i>L. major</i> | 76  | 433  | 508  |
| LmjF16.0620 | <i>L. major</i> | 144 | 516  | 659  |
| LmjF16.0620 | <i>L. major</i> | 115 | 863  | 977  |
| LmjF16.0620 | <i>L. major</i> | 50  | 1053 | 1102 |
| LmjF16.0630 | <i>L. major</i> | 73  | 59   | 131  |
| LmjF16.0630 | <i>L. major</i> | 53  | 240  | 292  |
| LmjF16.0630 | <i>L. major</i> | 81  | 414  | 494  |
| LmjF16.0630 | <i>L. major</i> | 57  | 518  | 574  |
| LmjF16.0640 | <i>L. major</i> | 42  | 1    | 42   |
| LmjF16.0640 | <i>L. major</i> | 137 | 146  | 282  |

|             |                 |     |      |      |
|-------------|-----------------|-----|------|------|
| LmjF16.0640 | <i>L. major</i> | 52  | 515  | 566  |
| LmjF16.0660 | <i>L. major</i> | 48  | 65   | 112  |
| LmjF16.0660 | <i>L. major</i> | 452 | 115  | 566  |
| LmjF16.0670 | <i>L. major</i> | 206 | 42   | 247  |
| LmjF16.0670 | <i>L. major</i> | 85  | 538  | 622  |
| LmjF16.0680 | <i>L. major</i> | 94  | 1    | 94   |
| LmjF16.0680 | <i>L. major</i> | 44  | 227  | 270  |
| LmjF16.0690 | <i>L. major</i> | 63  | 489  | 551  |
| LmjF16.0700 | <i>L. major</i> | 648 | 111  | 758  |
| LmjF16.0700 | <i>L. major</i> | 73  | 777  | 849  |
| LmjF16.0710 | <i>L. major</i> | 105 | 1    | 105  |
| LmjF16.0710 | <i>L. major</i> | 348 | 134  | 481  |
| LmjF16.0710 | <i>L. major</i> | 107 | 515  | 621  |
| LmjF16.0710 | <i>L. major</i> | 252 | 633  | 884  |
| LmjF16.0710 | <i>L. major</i> | 64  | 908  | 971  |
| LmjF16.0720 | <i>L. major</i> | 57  | 73   | 129  |
| LmjF16.0720 | <i>L. major</i> | 67  | 206  | 272  |
| LmjF16.0730 | <i>L. major</i> | 88  | 46   | 133  |
| LmjF16.0730 | <i>L. major</i> | 56  | 193  | 248  |
| LmjF16.0730 | <i>L. major</i> | 43  | 595  | 637  |
| LmjF16.0730 | <i>L. major</i> | 61  | 733  | 793  |
| LmjF16.0730 | <i>L. major</i> | 50  | 864  | 913  |
| LmjF16.0730 | <i>L. major</i> | 79  | 917  | 995  |
| LmjF16.0730 | <i>L. major</i> | 52  | 1035 | 1086 |
| LmjF16.0730 | <i>L. major</i> | 40  | 1169 | 1208 |
| LmjF16.0730 | <i>L. major</i> | 108 | 1248 | 1355 |
| LmjF16.0730 | <i>L. major</i> | 78  | 1511 | 1588 |
| LmjF16.0730 | <i>L. major</i> | 57  | 1722 | 1778 |
| LmjF16.0740 | <i>L. major</i> | 120 | 1    | 120  |
| LmjF16.0740 | <i>L. major</i> | 111 | 135  | 245  |
| LmjF16.0740 | <i>L. major</i> | 118 | 278  | 395  |
| LmjF16.0740 | <i>L. major</i> | 90  | 465  | 554  |
| LmjF16.0740 | <i>L. major</i> | 43  | 560  | 602  |
| LmjF16.0740 | <i>L. major</i> | 67  | 673  | 739  |
| LmjF16.0750 | <i>L. major</i> | 80  | 150  | 229  |
| LmjF16.0750 | <i>L. major</i> | 143 | 461  | 603  |
| LmjF16.0750 | <i>L. major</i> | 143 | 461  | 603  |
| LmjF16.0770 | <i>L. major</i> | 63  | 1    | 63   |
| LmjF16.0770 | <i>L. major</i> | 345 | 93   | 437  |
| LmjF16.0780 | <i>L. major</i> | 40  | 48   | 87   |
| LmjF16.0780 | <i>L. major</i> | 72  | 125  | 196  |
| LmjF16.0780 | <i>L. major</i> | 73  | 477  | 549  |
| LmjF16.0780 | <i>L. major</i> | 44  | 717  | 760  |
| LmjF16.0780 | <i>L. major</i> | 52  | 885  | 936  |
| LmjF16.0780 | <i>L. major</i> | 122 | 1025 | 1146 |
| LmjF16.0780 | <i>L. major</i> | 72  | 1262 | 1333 |
| LmjF16.0780 | <i>L. major</i> | 83  | 1429 | 1511 |

|             |                 |     |      |      |
|-------------|-----------------|-----|------|------|
| LmjF16.0780 | <i>L. major</i> | 76  | 1655 | 1730 |
| LmjF16.0780 | <i>L. major</i> | 53  | 1768 | 1820 |
| LmjF16.0780 | <i>L. major</i> | 70  | 1909 | 1978 |
| LmjF16.0780 | <i>L. major</i> | 72  | 2121 | 2192 |
| LmjF16.0780 | <i>L. major</i> | 54  | 2394 | 2447 |
| LmjF16.0780 | <i>L. major</i> | 59  | 2491 | 2549 |
| LmjF16.0780 | <i>L. major</i> | 46  | 2592 | 2637 |
| LmjF16.0780 | <i>L. major</i> | 60  | 2716 | 2775 |
| LmjF16.0780 | <i>L. major</i> | 43  | 2870 | 2912 |
| LmjF16.0780 | <i>L. major</i> | 108 | 3026 | 3133 |
| LmjF16.0780 | <i>L. major</i> | 53  | 3413 | 3465 |
| LmjF16.0780 | <i>L. major</i> | 58  | 3765 | 3822 |
| LmjF16.0780 | <i>L. major</i> | 48  | 4415 | 4462 |
| LmjF16.0780 | <i>L. major</i> | 92  | 5262 | 5353 |
| LmjF16.0780 | <i>L. major</i> | 176 | 5377 | 5552 |
| LmjF16.0800 | <i>L. major</i> | 96  | 273  | 368  |
| LmjF16.0810 | <i>L. major</i> | 40  | 114  | 153  |
| LmjF16.0810 | <i>L. major</i> | 74  | 177  | 250  |
| LmjF16.0820 | <i>L. major</i> | 239 | 173  | 411  |
| LmjF16.0820 | <i>L. major</i> | 51  | 558  | 608  |
| LmjF16.0820 | <i>L. major</i> | 57  | 621  | 677  |
| LmjF16.0830 | <i>L. major</i> | 147 | 9    | 155  |
| LmjF16.0840 | <i>L. major</i> | 48  | 237  | 284  |
| LmjF16.0840 | <i>L. major</i> | 44  | 325  | 368  |
| LmjF16.0840 | <i>L. major</i> | 44  | 325  | 368  |
| LmjF16.0850 | <i>L. major</i> | 56  | 330  | 385  |
| LmjF16.0850 | <i>L. major</i> | 53  | 426  | 478  |
| LmjF16.0850 | <i>L. major</i> | 53  | 426  | 478  |
| LmjF16.0860 | <i>L. major</i> | 69  | 50   | 118  |
| LmjF16.0860 | <i>L. major</i> | 87  | 148  | 234  |
| LmjF16.0860 | <i>L. major</i> | 87  | 148  | 234  |
| LmjF16.0870 | <i>L. major</i> | 142 | 1    | 142  |
| LmjF16.0870 | <i>L. major</i> | 40  | 158  | 197  |
| LmjF16.0870 | <i>L. major</i> | 48  | 364  | 411  |
| LmjF16.0880 | <i>L. major</i> | 64  | 60   | 123  |
| LmjF16.0880 | <i>L. major</i> | 60  | 176  | 235  |
| LmjF16.0880 | <i>L. major</i> | 60  | 176  | 235  |
| LmjF16.0890 | <i>L. major</i> | 83  | 95   | 177  |
| LmjF16.0890 | <i>L. major</i> | 55  | 291  | 345  |
| LmjF16.0890 | <i>L. major</i> | 46  | 457  | 502  |
| LmjF16.0890 | <i>L. major</i> | 129 | 534  | 662  |
| LmjF16.0895 | <i>L. major</i> | 91  | 41   | 131  |
| LmjF16.0895 | <i>L. major</i> | 65  | 163  | 227  |
| LmjF16.0895 | <i>L. major</i> | 65  | 163  | 227  |
| LmjF16.0900 | <i>L. major</i> | 41  | 156  | 196  |
| LmjF16.0900 | <i>L. major</i> | 83  | 198  | 280  |
| LmjF16.0900 | <i>L. major</i> | 46  | 552  | 597  |

|             |                 |     |      |      |
|-------------|-----------------|-----|------|------|
| LmjF16.0900 | <i>L. major</i> | 45  | 1092 | 1136 |
| LmjF16.0900 | <i>L. major</i> | 42  | 1138 | 1179 |
| LmjF16.0900 | <i>L. major</i> | 46  | 1506 | 1551 |
| LmjF16.0930 | <i>L. major</i> | 42  | 1    | 42   |
| LmjF16.0930 | <i>L. major</i> | 91  | 130  | 220  |
| LmjF16.0960 | <i>L. major</i> | 57  | 192  | 248  |
| LmjF16.0960 | <i>L. major</i> | 81  | 267  | 347  |
| LmjF16.0960 | <i>L. major</i> | 81  | 267  | 347  |
| LmjF16.0970 | <i>L. major</i> | 97  | 166  | 262  |
| LmjF16.0970 | <i>L. major</i> | 48  | 290  | 337  |
| LmjF16.0970 | <i>L. major</i> | 105 | 600  | 704  |
| LmjF16.0980 | <i>L. major</i> | 56  | 1    | 56   |
| LmjF16.0980 | <i>L. major</i> | 642 | 66   | 707  |
| LmjF16.0990 | <i>L. major</i> | 59  | 148  | 206  |
| LmjF16.0990 | <i>L. major</i> | 63  | 297  | 359  |
| LmjF16.1005 | <i>L. major</i> | 127 | 1    | 127  |
| LmjF16.1005 | <i>L. major</i> | 88  | 229  | 316  |
| LmjF16.1010 | <i>L. major</i> | 119 | 99   | 217  |
| LmjF16.1010 | <i>L. major</i> | 44  | 523  | 566  |
| LmjF16.1015 | <i>L. major</i> | 125 | 1    | 125  |
| LmjF16.1015 | <i>L. major</i> | 64  | 682  | 745  |
| LmjF16.1020 | <i>L. major</i> | 125 | 1    | 125  |
| LmjF16.1030 | <i>L. major</i> | 125 | 1    | 125  |
| LmjF16.1040 | <i>L. major</i> | 44  | 259  | 302  |
| LmjF16.1050 | <i>L. major</i> | 58  | 92   | 149  |
| LmjF16.1050 | <i>L. major</i> | 49  | 285  | 333  |
| LmjF16.1050 | <i>L. major</i> | 51  | 498  | 548  |
| LmjF16.1060 | <i>L. major</i> | 42  | 138  | 179  |
| LmjF16.1060 | <i>L. major</i> | 56  | 598  | 653  |
| LmjF16.1060 | <i>L. major</i> | 56  | 598  | 653  |
| LmjF16.1065 | <i>L. major</i> | 77  | 77   | 153  |
| LmjF16.1070 | <i>L. major</i> | 69  | 155  | 223  |
| LmjF16.1070 | <i>L. major</i> | 49  | 442  | 490  |
| LmjF16.1070 | <i>L. major</i> | 49  | 442  | 490  |
| LmjF16.1080 | <i>L. major</i> | 44  | 1    | 44   |
| LmjF16.1080 | <i>L. major</i> | 462 | 88   | 549  |
| LmjF16.1080 | <i>L. major</i> | 72  | 569  | 640  |
| LmjF16.1090 | <i>L. major</i> | 163 | 1    | 163  |
| LmjF16.1090 | <i>L. major</i> | 71  | 228  | 298  |
| LmjF16.1090 | <i>L. major</i> | 747 | 336  | 1082 |
| LmjF16.1090 | <i>L. major</i> | 782 | 1085 | 1866 |
| LmjF16.1090 | <i>L. major</i> | 221 | 1927 | 2147 |
| LmjF16.1100 | <i>L. major</i> | 492 | 67   | 558  |
| LmjF16.1110 | <i>L. major</i> | 123 | 1    | 123  |
| LmjF16.1120 | <i>L. major</i> | 55  | 86   | 140  |
| LmjF16.1140 | <i>L. major</i> | 162 | 216  | 377  |
| LmjF16.1140 | <i>L. major</i> | 106 | 401  | 506  |



|             |                 |     |      |      |
|-------------|-----------------|-----|------|------|
| LmjF16.1140 | <i>L. major</i> | 121 | 509  | 629  |
| LmjF16.1160 | <i>L. major</i> | 89  | 127  | 215  |
| LmjF16.1160 | <i>L. major</i> | 65  | 271  | 335  |
| LmjF16.1160 | <i>L. major</i> | 44  | 423  | 466  |
| LmjF16.1180 | <i>L. major</i> | 183 | 140  | 322  |
| LmjF16.1190 | <i>L. major</i> | 103 | 147  | 249  |
| LmjF16.1190 | <i>L. major</i> | 55  | 430  | 484  |
| LmjF16.1190 | <i>L. major</i> | 96  | 1051 | 1146 |
| LmjF16.1190 | <i>L. major</i> | 212 | 1230 | 1441 |
| LmjF16.1200 | <i>L. major</i> | 122 | 245  | 366  |
| LmjF16.1210 | <i>L. major</i> | 160 | 63   | 222  |
| LmjF16.1210 | <i>L. major</i> | 147 | 334  | 480  |
| LmjF16.1210 | <i>L. major</i> | 51  | 862  | 912  |
| LmjF16.1210 | <i>L. major</i> | 79  | 1157 | 1235 |
| LmjF16.1220 | <i>L. major</i> | 79  | 1    | 79   |
| LmjF16.1220 | <i>L. major</i> | 52  | 105  | 156  |
| LmjF16.1220 | <i>L. major</i> | 551 | 252  | 802  |
| LmjF16.1220 | <i>L. major</i> | 240 | 906  | 1145 |
| LmjF16.1220 | <i>L. major</i> | 259 | 1303 | 1561 |
| LmjF16.1220 | <i>L. major</i> | 41  | 1676 | 1716 |
| LmjF16.1220 | <i>L. major</i> | 41  | 1809 | 1849 |
| LmjF16.1220 | <i>L. major</i> | 51  | 2063 | 2113 |
| LmjF16.1230 | <i>L. major</i> | 76  | 1    | 76   |
| LmjF16.1230 | <i>L. major</i> | 59  | 424  | 482  |
| LmjF16.1230 | <i>L. major</i> | 44  | 540  | 583  |
| LmjF16.1230 | <i>L. major</i> | 59  | 1320 | 1378 |
| LmjF16.1230 | <i>L. major</i> | 171 | 1643 | 1813 |
| LmjF16.1240 | <i>L. major</i> | 120 | 65   | 184  |
| LmjF16.1240 | <i>L. major</i> | 59  | 238  | 296  |
| LmjF16.1240 | <i>L. major</i> | 274 | 372  | 645  |
| LmjF16.1240 | <i>L. major</i> | 48  | 754  | 801  |
| LmjF16.1240 | <i>L. major</i> | 115 | 903  | 1017 |
| LmjF16.1240 | <i>L. major</i> | 52  | 1120 | 1171 |
| LmjF16.1240 | <i>L. major</i> | 382 | 1203 | 1584 |
| LmjF16.1240 | <i>L. major</i> | 48  | 1824 | 1871 |
| LmjF16.1240 | <i>L. major</i> | 116 | 1993 | 2108 |
| LmjF16.1250 | <i>L. major</i> | 47  | 52   | 98   |
| LmjF16.1260 | <i>L. major</i> | 274 | 16   | 289  |
| LmjF16.1260 | <i>L. major</i> | 63  | 671  | 733  |
| LmjF16.1260 | <i>L. major</i> | 105 | 757  | 861  |
| LmjF16.1260 | <i>L. major</i> | 53  | 977  | 1029 |
| LmjF16.1260 | <i>L. major</i> | 86  | 1283 | 1368 |
| LmjF16.1260 | <i>L. major</i> | 51  | 1418 | 1468 |
| LmjF16.1260 | <i>L. major</i> | 44  | 1604 | 1647 |
| LmjF16.1270 | <i>L. major</i> | 245 | 1    | 245  |
| LmjF16.1270 | <i>L. major</i> | 182 | 282  | 463  |
| LmjF16.1270 | <i>L. major</i> | 43  | 549  | 591  |

|             |                 |     |      |      |
|-------------|-----------------|-----|------|------|
| LmjF16.1270 | <i>L. major</i> | 150 | 599  | 748  |
| LmjF16.1270 | <i>L. major</i> | 44  | 916  | 959  |
| LmjF16.1270 | <i>L. major</i> | 460 | 1065 | 1524 |
| LmjF16.1270 | <i>L. major</i> | 85  | 1535 | 1619 |
| LmjF16.1270 | <i>L. major</i> | 67  | 1725 | 1791 |
| LmjF16.1270 | <i>L. major</i> | 76  | 1899 | 1974 |
| LmjF16.1270 | <i>L. major</i> | 74  | 2075 | 2148 |
| LmjF16.1290 | <i>L. major</i> | 146 | 1    | 146  |
| LmjF16.1290 | <i>L. major</i> | 44  | 372  | 415  |
| LmjF16.1290 | <i>L. major</i> | 42  | 671  | 712  |
| LmjF16.1300 | <i>L. major</i> | 192 | 49   | 240  |
| LmjF16.1300 | <i>L. major</i> | 91  | 279  | 369  |
| LmjF16.1300 | <i>L. major</i> | 151 | 460  | 610  |
| LmjF16.1300 | <i>L. major</i> | 41  | 795  | 835  |
| LmjF16.1300 | <i>L. major</i> | 75  | 859  | 933  |
| LmjF16.1330 | <i>L. major</i> | 641 | 1    | 641  |
| LmjF16.1330 | <i>L. major</i> | 69  | 1273 | 1341 |
| LmjF16.1340 | <i>L. major</i> | 135 | 25   | 159  |
| LmjF16.1340 | <i>L. major</i> | 72  | 175  | 246  |
| LmjF16.1340 | <i>L. major</i> | 43  | 390  | 432  |
| LmjF16.1340 | <i>L. major</i> | 64  | 625  | 688  |
| LmjF16.1340 | <i>L. major</i> | 214 | 747  | 960  |
| LmjF16.1340 | <i>L. major</i> | 41  | 1047 | 1087 |
| LmjF16.1340 | <i>L. major</i> | 53  | 1441 | 1493 |
| LmjF16.1340 | <i>L. major</i> | 55  | 1619 | 1673 |
| LmjF16.1340 | <i>L. major</i> | 45  | 1808 | 1852 |
| LmjF16.1340 | <i>L. major</i> | 48  | 2230 | 2277 |
| LmjF16.1340 | <i>L. major</i> | 46  | 2312 | 2357 |
| LmjF16.1340 | <i>L. major</i> | 136 | 2499 | 2634 |
| LmjF16.1340 | <i>L. major</i> | 93  | 3037 | 3129 |
| LmjF16.1340 | <i>L. major</i> | 54  | 3308 | 3361 |
| LmjF16.1340 | <i>L. major</i> | 56  | 3413 | 3468 |
| LmjF16.1340 | <i>L. major</i> | 65  | 3511 | 3575 |
| LmjF16.1340 | <i>L. major</i> | 158 | 3601 | 3758 |
| LmjF16.1350 | <i>L. major</i> | 48  | 218  | 265  |
| LmjF16.1350 | <i>L. major</i> | 51  | 1110 | 1160 |
| LmjF16.1350 | <i>L. major</i> | 165 | 1385 | 1549 |
| LmjF16.1390 | <i>L. major</i> | 47  | 182  | 228  |
| LmjF16.1410 | <i>L. major</i> | 77  | 63   | 139  |
| LmjF16.1410 | <i>L. major</i> | 162 | 323  | 484  |
| LmjF16.1410 | <i>L. major</i> | 162 | 323  | 484  |
| LmjF16.1420 | <i>L. major</i> | 68  | 89   | 156  |
| LmjF16.1425 | <i>L. major</i> | 120 | 259  | 378  |
| LmjF16.1425 | <i>L. major</i> | 42  | 487  | 528  |
| LmjF16.1425 | <i>L. major</i> | 42  | 487  | 528  |
| LmjF16.1427 | <i>L. major</i> | 120 | 259  | 378  |
| LmjF16.1427 | <i>L. major</i> | 42  | 487  | 528  |

|             |                 |      |      |      |
|-------------|-----------------|------|------|------|
| LmjF16.1427 | <i>L. major</i> | 42   | 487  | 528  |
| LmjF16.1430 | <i>L. major</i> | 120  | 259  | 378  |
| LmjF16.1430 | <i>L. major</i> | 42   | 487  | 528  |
| LmjF16.1430 | <i>L. major</i> | 42   | 487  | 528  |
| LmjF16.1440 | <i>L. major</i> | 88   | 1    | 88   |
| LmjF16.1440 | <i>L. major</i> | 42   | 95   | 136  |
| LmjF16.1440 | <i>L. major</i> | 55   | 354  | 408  |
| LmjF16.1440 | <i>L. major</i> | 78   | 604  | 681  |
| LmjF16.1440 | <i>L. major</i> | 72   | 726  | 797  |
| LmjF16.1440 | <i>L. major</i> | 97   | 1010 | 1106 |
| LmjF16.1440 | <i>L. major</i> | 59   | 1259 | 1317 |
| LmjF16.1450 | <i>L. major</i> | 84   | 1    | 84   |
| LmjF16.1450 | <i>L. major</i> | 62   | 124  | 185  |
| LmjF16.1450 | <i>L. major</i> | 55   | 187  | 241  |
| LmjF16.1460 | <i>L. major</i> | 1656 | 448  | 2103 |
| LmjF16.1460 | <i>L. major</i> | 50   | 2208 | 2257 |
| LmjF16.1470 | <i>L. major</i> | 216  | 448  | 663  |
| LmjF16.1470 | <i>L. major</i> | 43   | 765  | 807  |
| LmjF16.1480 | <i>L. major</i> | 43   | 1    | 43   |
| LmjF16.1480 | <i>L. major</i> | 93   | 271  | 363  |
| LmjF16.1480 | <i>L. major</i> | 93   | 271  | 363  |
| LmjF16.1490 | <i>L. major</i> | 56   | 268  | 323  |
| LmjF16.1500 | <i>L. major</i> | 48   | 151  | 198  |
| LmjF16.1500 | <i>L. major</i> | 68   | 344  | 411  |
| LmjF16.1500 | <i>L. major</i> | 41   | 528  | 568  |
| LmjF16.1520 | <i>L. major</i> | 45   | 40   | 84   |
| LmjF16.1520 | <i>L. major</i> | 67   | 253  | 319  |
| LmjF16.1520 | <i>L. major</i> | 139  | 699  | 837  |
| LmjF16.1520 | <i>L. major</i> | 143  | 995  | 1137 |
| LmjF16.1540 | <i>L. major</i> | 113  | 1    | 113  |
| LmjF16.1540 | <i>L. major</i> | 101  | 115  | 215  |
| LmjF16.1550 | <i>L. major</i> | 445  | 713  | 1157 |
| LmjF16.1560 | <i>L. major</i> | 53   | 285  | 337  |
| LmjF16.1560 | <i>L. major</i> | 77   | 615  | 691  |
| LmjF16.1560 | <i>L. major</i> | 77   | 615  | 691  |
| LmjF16.1570 | <i>L. major</i> | 136  | 141  | 276  |
| LmjF16.1580 | <i>L. major</i> | 75   | 217  | 291  |
| LmjF16.1580 | <i>L. major</i> | 138  | 487  | 624  |
| LmjF16.1580 | <i>L. major</i> | 104  | 648  | 751  |
| LmjF16.1580 | <i>L. major</i> | 42   | 946  | 987  |
| LmjF16.1590 | <i>L. major</i> | 133  | 1    | 133  |
| LmjF16.1600 | <i>L. major</i> | 58   | 133  | 190  |
| LmjF16.1600 | <i>L. major</i> | 113  | 281  | 393  |
| LmjF16.1620 | <i>L. major</i> | 68   | 187  | 254  |
| LmjF16.1620 | <i>L. major</i> | 71   | 291  | 361  |
| LmjF16.1620 | <i>L. major</i> | 71   | 291  | 361  |
| LmjF16.1630 | <i>L. major</i> | 50   | 72   | 121  |

|             |                 |     |      |      |
|-------------|-----------------|-----|------|------|
| LmjF16.1630 | <i>L. major</i> | 87  | 153  | 239  |
| LmjF16.1630 | <i>L. major</i> | 87  | 153  | 239  |
| LmjF16.1660 | <i>L. major</i> | 42  | 799  | 840  |
| LmjF16.1660 | <i>L. major</i> | 193 | 1580 | 1772 |
| LmjF16.1660 | <i>L. major</i> | 87  | 3830 | 3916 |
| LmjF16.1660 | <i>L. major</i> | 271 | 3927 | 4197 |
| LmjF17.0010 | <i>L. major</i> | 43  | 78   | 120  |
| LmjF17.0010 | <i>L. major</i> | 110 | 517  | 626  |
| LmjF17.0010 | <i>L. major</i> | 100 | 675  | 774  |
| LmjF17.0030 | <i>L. major</i> | 51  | 1    | 51   |
| LmjF17.0030 | <i>L. major</i> | 67  | 122  | 188  |
| LmjF17.0030 | <i>L. major</i> | 67  | 122  | 188  |
| LmjF17.0040 | <i>L. major</i> | 49  | 214  | 262  |
| LmjF17.0050 | <i>L. major</i> | 51  | 150  | 200  |
| LmjF17.0060 | <i>L. major</i> | 72  | 482  | 553  |
| LmjF17.0100 | <i>L. major</i> | 57  | 1    | 57   |
| LmjF17.0100 | <i>L. major</i> | 49  | 363  | 411  |
| LmjF17.0100 | <i>L. major</i> | 48  | 465  | 512  |
| LmjF17.0100 | <i>L. major</i> | 81  | 516  | 596  |
| LmjF17.0110 | <i>L. major</i> | 131 | 1    | 131  |
| LmjF17.0110 | <i>L. major</i> | 367 | 160  | 526  |
| LmjF17.0120 | <i>L. major</i> | 40  | 1    | 40   |
| LmjF17.0130 | <i>L. major</i> | 183 | 659  | 841  |
| LmjF17.0150 | <i>L. major</i> | 43  | 313  | 355  |
| LmjF17.0150 | <i>L. major</i> | 54  | 391  | 444  |
| LmjF17.0150 | <i>L. major</i> | 54  | 391  | 444  |
| LmjF17.0160 | <i>L. major</i> | 42  | 46   | 87   |
| LmjF17.0160 | <i>L. major</i> | 120 | 156  | 275  |
| LmjF17.0160 | <i>L. major</i> | 106 | 312  | 417  |
| LmjF17.0160 | <i>L. major</i> | 128 | 453  | 580  |
| LmjF17.0160 | <i>L. major</i> | 279 | 628  | 906  |
| LmjF17.0160 | <i>L. major</i> | 52  | 983  | 1034 |
| LmjF17.0170 | <i>L. major</i> | 206 | 1    | 206  |
| LmjF17.0180 | <i>L. major</i> | 52  | 1274 | 1325 |
| LmjF17.0190 | <i>L. major</i> | 122 | 1293 | 1414 |
| LmjF17.0200 | <i>L. major</i> | 115 | 1244 | 1358 |
| LmjF17.0230 | <i>L. major</i> | 44  | 776  | 819  |
| LmjF17.0240 | <i>L. major</i> | 131 | 1    | 131  |
| LmjF17.0240 | <i>L. major</i> | 206 | 190  | 395  |
| LmjF17.0240 | <i>L. major</i> | 91  | 876  | 966  |
| LmjF17.0240 | <i>L. major</i> | 126 | 1017 | 1142 |
| LmjF17.0260 | <i>L. major</i> | 178 | 28   | 205  |
| LmjF17.0260 | <i>L. major</i> | 546 | 240  | 785  |
| LmjF17.0270 | <i>L. major</i> | 42  | 232  | 273  |
| LmjF17.0280 | <i>L. major</i> | 75  | 1    | 75   |
| LmjF17.0290 | <i>L. major</i> | 217 | 82   | 298  |
| LmjF17.0290 | <i>L. major</i> | 55  | 587  | 641  |

|             |                 |     |      |      |
|-------------|-----------------|-----|------|------|
| LmjF17.0300 | <i>L. major</i> | 41  | 1    | 41   |
| LmjF17.0300 | <i>L. major</i> | 63  | 141  | 203  |
| LmjF17.0300 | <i>L. major</i> | 63  | 141  | 203  |
| LmjF17.0310 | <i>L. major</i> | 145 | 1    | 145  |
| LmjF17.0310 | <i>L. major</i> | 71  | 215  | 285  |
| LmjF17.0310 | <i>L. major</i> | 341 | 364  | 704  |
| LmjF17.0310 | <i>L. major</i> | 615 | 733  | 1347 |
| LmjF17.0320 | <i>L. major</i> | 82  | 1    | 82   |
| LmjF17.0320 | <i>L. major</i> | 171 | 159  | 329  |
| LmjF17.0330 | <i>L. major</i> | 47  | 237  | 283  |
| LmjF17.0330 | <i>L. major</i> | 44  | 666  | 709  |
| LmjF17.0330 | <i>L. major</i> | 41  | 1253 | 1293 |
| LmjF17.0330 | <i>L. major</i> | 47  | 1337 | 1383 |
| LmjF17.0350 | <i>L. major</i> | 232 | 1    | 232  |
| LmjF17.0370 | <i>L. major</i> | 87  | 1    | 87   |
| LmjF17.0370 | <i>L. major</i> | 118 | 184  | 301  |
| LmjF17.0370 | <i>L. major</i> | 323 | 314  | 636  |
| LmjF17.0380 | <i>L. major</i> | 48  | 22   | 69   |
| LmjF17.0380 | <i>L. major</i> | 147 | 87   | 233  |
| LmjF17.0390 | <i>L. major</i> | 70  | 1    | 70   |
| LmjF17.0390 | <i>L. major</i> | 55  | 97   | 151  |
| LmjF17.0390 | <i>L. major</i> | 50  | 265  | 314  |
| LmjF17.0390 | <i>L. major</i> | 84  | 587  | 670  |
| LmjF17.0390 | <i>L. major</i> | 109 | 743  | 851  |
| LmjF17.0390 | <i>L. major</i> | 50  | 1119 | 1168 |
| LmjF17.0400 | <i>L. major</i> | 209 | 40   | 248  |
| LmjF17.0400 | <i>L. major</i> | 69  | 307  | 375  |
| LmjF17.0400 | <i>L. major</i> | 80  | 481  | 560  |
| LmjF17.0410 | <i>L. major</i> | 50  | 54   | 103  |
| LmjF17.0410 | <i>L. major</i> | 119 | 421  | 539  |
| LmjF17.0410 | <i>L. major</i> | 405 | 658  | 1062 |
| LmjF17.0420 | <i>L. major</i> | 57  | 227  | 283  |
| LmjF17.0420 | <i>L. major</i> | 40  | 296  | 335  |
| LmjF17.0420 | <i>L. major</i> | 149 | 354  | 502  |
| LmjF17.0430 | <i>L. major</i> | 919 | 1    | 919  |
| LmjF17.0430 | <i>L. major</i> | 143 | 980  | 1122 |
| LmjF17.0430 | <i>L. major</i> | 48  | 1241 | 1288 |
| LmjF17.0440 | <i>L. major</i> | 82  | 112  | 193  |
| LmjF17.0440 | <i>L. major</i> | 79  | 216  | 294  |
| LmjF17.0440 | <i>L. major</i> | 55  | 345  | 399  |
| LmjF17.0440 | <i>L. major</i> | 274 | 455  | 728  |
| LmjF17.0440 | <i>L. major</i> | 564 | 756  | 1319 |
| LmjF17.0440 | <i>L. major</i> | 223 | 1373 | 1595 |
| LmjF17.0440 | <i>L. major</i> | 238 | 1697 | 1934 |
| LmjF17.0450 | <i>L. major</i> | 161 | 93   | 253  |
| LmjF17.0450 | <i>L. major</i> | 64  | 354  | 417  |
| LmjF17.0450 | <i>L. major</i> | 66  | 461  | 526  |

|             |                 |     |      |      |
|-------------|-----------------|-----|------|------|
| LmjF17.0450 | <i>L. major</i> | 68  | 586  | 653  |
| LmjF17.0450 | <i>L. major</i> | 198 | 727  | 924  |
| LmjF17.0450 | <i>L. major</i> | 43  | 1187 | 1229 |
| LmjF17.0450 | <i>L. major</i> | 65  | 1312 | 1376 |
| LmjF17.0470 | <i>L. major</i> | 64  | 137  | 200  |
| LmjF17.0470 | <i>L. major</i> | 86  | 306  | 391  |
| LmjF17.0470 | <i>L. major</i> | 48  | 406  | 453  |
| LmjF17.0470 | <i>L. major</i> | 66  | 485  | 550  |
| LmjF17.0470 | <i>L. major</i> | 77  | 828  | 904  |
| LmjF17.0470 | <i>L. major</i> | 106 | 1201 | 1306 |
| LmjF17.0470 | <i>L. major</i> | 50  | 1498 | 1547 |
| LmjF17.0470 | <i>L. major</i> | 44  | 1845 | 1888 |
| LmjF17.0470 | <i>L. major</i> | 71  | 1973 | 2043 |
| LmjF17.0470 | <i>L. major</i> | 49  | 2084 | 2132 |
| LmjF17.0470 | <i>L. major</i> | 49  | 2152 | 2200 |
| LmjF17.0470 | <i>L. major</i> | 43  | 2321 | 2363 |
| LmjF17.0470 | <i>L. major</i> | 46  | 2423 | 2468 |
| LmjF17.0470 | <i>L. major</i> | 63  | 2509 | 2571 |
| LmjF17.0470 | <i>L. major</i> | 97  | 2809 | 2905 |
| LmjF17.0470 | <i>L. major</i> | 74  | 3044 | 3117 |
| LmjF17.0480 | <i>L. major</i> | 42  | 49   | 90   |
| LmjF17.0480 | <i>L. major</i> | 112 | 123  | 234  |
| LmjF17.0490 | <i>L. major</i> | 259 | 1    | 259  |
| LmjF17.0490 | <i>L. major</i> | 100 | 331  | 430  |
| LmjF17.0490 | <i>L. major</i> | 61  | 462  | 522  |
| LmjF17.0490 | <i>L. major</i> | 52  | 525  | 576  |
| LmjF17.0490 | <i>L. major</i> | 41  | 743  | 783  |
| LmjF17.0500 | <i>L. major</i> | 362 | 1    | 362  |
| LmjF17.0500 | <i>L. major</i> | 116 | 399  | 514  |
| LmjF17.0500 | <i>L. major</i> | 91  | 553  | 643  |
| LmjF17.0500 | <i>L. major</i> | 64  | 678  | 741  |
| LmjF17.0500 | <i>L. major</i> | 112 | 800  | 911  |
| LmjF17.0500 | <i>L. major</i> | 221 | 920  | 1140 |
| LmjF17.0500 | <i>L. major</i> | 71  | 1212 | 1282 |
| LmjF17.0500 | <i>L. major</i> | 126 | 1300 | 1425 |
| LmjF17.0510 | <i>L. major</i> | 477 | 1    | 477  |
| LmjF17.0510 | <i>L. major</i> | 240 | 522  | 761  |
| LmjF17.0510 | <i>L. major</i> | 56  | 763  | 818  |
| LmjF17.0510 | <i>L. major</i> | 213 | 820  | 1032 |
| LmjF17.0520 | <i>L. major</i> | 70  | 1    | 70   |
| LmjF17.0520 | <i>L. major</i> | 354 | 78   | 431  |
| LmjF17.0520 | <i>L. major</i> | 121 | 457  | 577  |
| LmjF17.0520 | <i>L. major</i> | 240 | 606  | 845  |
| LmjF17.0530 | <i>L. major</i> | 149 | 1    | 149  |
| LmjF17.0530 | <i>L. major</i> | 46  | 175  | 220  |
| LmjF17.0530 | <i>L. major</i> | 432 | 228  | 659  |
| LmjF17.0530 | <i>L. major</i> | 263 | 661  | 923  |

|             |                 |     |      |      |
|-------------|-----------------|-----|------|------|
| LmjF17.0530 | <i>L. major</i> | 88  | 963  | 1050 |
| LmjF17.0540 | <i>L. major</i> | 50  | 1    | 50   |
| LmjF17.0540 | <i>L. major</i> | 59  | 59   | 117  |
| LmjF17.0540 | <i>L. major</i> | 182 | 142  | 323  |
| LmjF17.0540 | <i>L. major</i> | 49  | 610  | 658  |
| LmjF17.0540 | <i>L. major</i> | 60  | 910  | 969  |
| LmjF17.0540 | <i>L. major</i> | 271 | 1000 | 1270 |
| LmjF17.0550 | <i>L. major</i> | 163 | 55   | 217  |
| LmjF17.0560 | <i>L. major</i> | 60  | 62   | 121  |
| LmjF17.0570 | <i>L. major</i> | 184 | 15   | 198  |
| LmjF17.0570 | <i>L. major</i> | 711 | 207  | 917  |
| LmjF17.0570 | <i>L. major</i> | 47  | 948  | 994  |
| LmjF17.0570 | <i>L. major</i> | 126 | 1022 | 1147 |
| LmjF17.0580 | <i>L. major</i> | 58  | 189  | 246  |
| LmjF17.0590 | <i>L. major</i> | 40  | 123  | 162  |
| LmjF17.0590 | <i>L. major</i> | 43  | 193  | 235  |
| LmjF17.0590 | <i>L. major</i> | 91  | 274  | 364  |
| LmjF17.0590 | <i>L. major</i> | 50  | 388  | 437  |
| LmjF17.0590 | <i>L. major</i> | 73  | 575  | 647  |
| LmjF17.0590 | <i>L. major</i> | 259 | 677  | 935  |
| LmjF17.0590 | <i>L. major</i> | 64  | 983  | 1046 |
| LmjF17.0590 | <i>L. major</i> | 71  | 1080 | 1150 |
| LmjF17.0590 | <i>L. major</i> | 165 | 1175 | 1339 |
| LmjF17.0590 | <i>L. major</i> | 154 | 1341 | 1494 |
| LmjF17.0590 | <i>L. major</i> | 67  | 1572 | 1638 |
| LmjF17.0600 | <i>L. major</i> | 40  | 433  | 472  |
| LmjF17.0600 | <i>L. major</i> | 40  | 566  | 605  |
| LmjF17.0600 | <i>L. major</i> | 40  | 1012 | 1051 |
| LmjF17.0610 | <i>L. major</i> | 238 | 261  | 498  |
| LmjF17.0650 | <i>L. major</i> | 102 | 1    | 102  |
| LmjF17.0650 | <i>L. major</i> | 136 | 211  | 346  |
| LmjF17.0650 | <i>L. major</i> | 89  | 550  | 638  |
| LmjF17.0650 | <i>L. major</i> | 60  | 659  | 718  |
| LmjF17.0650 | <i>L. major</i> | 92  | 822  | 913  |
| LmjF17.0650 | <i>L. major</i> | 91  | 1044 | 1134 |
| LmjF17.0660 | <i>L. major</i> | 42  | 182  | 223  |
| LmjF17.0660 | <i>L. major</i> | 143 | 368  | 510  |
| LmjF17.0660 | <i>L. major</i> | 62  | 525  | 586  |
| LmjF17.0660 | <i>L. major</i> | 245 | 668  | 912  |
| LmjF17.0670 | <i>L. major</i> | 89  | 1    | 89   |
| LmjF17.0670 | <i>L. major</i> | 201 | 105  | 305  |
| LmjF17.0670 | <i>L. major</i> | 250 | 313  | 562  |
| LmjF17.0670 | <i>L. major</i> | 42  | 598  | 639  |
| LmjF17.0670 | <i>L. major</i> | 269 | 882  | 1150 |
| LmjF17.0670 | <i>L. major</i> | 47  | 1274 | 1320 |
| LmjF17.0670 | <i>L. major</i> | 51  | 1341 | 1391 |
| LmjF17.0670 | <i>L. major</i> | 41  | 1458 | 1498 |

|             |                 |     |      |      |
|-------------|-----------------|-----|------|------|
| LmjF17.0670 | <i>L. major</i> | 173 | 1509 | 1681 |
| LmjF17.0680 | <i>L. major</i> | 93  | 352  | 444  |
| LmjF17.0690 | <i>L. major</i> | 66  | 104  | 169  |
| LmjF17.0690 | <i>L. major</i> | 324 | 181  | 504  |
| LmjF17.0700 | <i>L. major</i> | 66  | 177  | 242  |
| LmjF17.0700 | <i>L. major</i> | 74  | 408  | 481  |
| LmjF17.0710 | <i>L. major</i> | 451 | 112  | 562  |
| LmjF17.0710 | <i>L. major</i> | 105 | 574  | 678  |
| LmjF17.0710 | <i>L. major</i> | 45  | 766  | 810  |
| LmjF17.0720 | <i>L. major</i> | 104 | 161  | 264  |
| LmjF17.0720 | <i>L. major</i> | 59  | 328  | 386  |
| LmjF17.0720 | <i>L. major</i> | 41  | 420  | 460  |
| LmjF17.0720 | <i>L. major</i> | 144 | 525  | 668  |
| LmjF17.0720 | <i>L. major</i> | 57  | 742  | 798  |
| LmjF17.0730 | <i>L. major</i> | 126 | 80   | 205  |
| LmjF17.0733 | <i>L. major</i> | 187 | 1    | 187  |
| LmjF17.0733 | <i>L. major</i> | 40  | 231  | 270  |
| LmjF17.0740 | <i>L. major</i> | 41  | 215  | 255  |
| LmjF17.0750 | <i>L. major</i> | 179 | 1    | 179  |
| LmjF17.0750 | <i>L. major</i> | 366 | 210  | 575  |
| LmjF17.0760 | <i>L. major</i> | 43  | 281  | 323  |
| LmjF17.0770 | <i>L. major</i> | 98  | 62   | 159  |
| LmjF17.0770 | <i>L. major</i> | 82  | 200  | 281  |
| LmjF17.0770 | <i>L. major</i> | 74  | 370  | 443  |
| LmjF17.0790 | <i>L. major</i> | 44  | 1    | 44   |
| LmjF17.0790 | <i>L. major</i> | 213 | 277  | 489  |
| LmjF17.0800 | <i>L. major</i> | 68  | 197  | 264  |
| LmjF17.0800 | <i>L. major</i> | 95  | 318  | 412  |
| LmjF17.0800 | <i>L. major</i> | 75  | 494  | 568  |
| LmjF17.0800 | <i>L. major</i> | 337 | 602  | 938  |
| LmjF17.0810 | <i>L. major</i> | 65  | 56   | 120  |
| LmjF17.0810 | <i>L. major</i> | 48  | 252  | 299  |
| LmjF17.0815 | <i>L. major</i> | 207 | 1    | 207  |
| LmjF17.0820 | <i>L. major</i> | 50  | 1    | 50   |
| LmjF17.0820 | <i>L. major</i> | 102 | 55   | 156  |
| LmjF17.0820 | <i>L. major</i> | 56  | 160  | 215  |
| LmjF17.0820 | <i>L. major</i> | 87  | 240  | 326  |
| LmjF17.0820 | <i>L. major</i> | 192 | 359  | 550  |
| LmjF17.0830 | <i>L. major</i> | 46  | 1    | 46   |
| LmjF17.0830 | <i>L. major</i> | 184 | 436  | 619  |
| LmjF17.0840 | <i>L. major</i> | 118 | 1    | 118  |
| LmjF17.0840 | <i>L. major</i> | 65  | 176  | 240  |
| LmjF17.0840 | <i>L. major</i> | 47  | 360  | 406  |
| LmjF17.0850 | <i>L. major</i> | 77  | 1    | 77   |
| LmjF17.0860 | <i>L. major</i> | 129 | 19   | 147  |
| LmjF17.0900 | <i>L. major</i> | 50  | 1    | 50   |
| LmjF17.0900 | <i>L. major</i> | 151 | 452  | 602  |



|             |                 |     |      |      |
|-------------|-----------------|-----|------|------|
| LmjF17.0920 | <i>L. major</i> | 116 | 123  | 238  |
| LmjF17.0920 | <i>L. major</i> | 48  | 366  | 413  |
| LmjF17.0920 | <i>L. major</i> | 46  | 1872 | 1917 |
| LmjF17.0930 | <i>L. major</i> | 116 | 76   | 191  |
| LmjF17.0930 | <i>L. major</i> | 255 | 225  | 479  |
| LmjF17.0930 | <i>L. major</i> | 234 | 498  | 731  |
| LmjF17.0930 | <i>L. major</i> | 260 | 1041 | 1300 |
| LmjF17.0940 | <i>L. major</i> | 41  | 34   | 74   |
| LmjF17.0940 | <i>L. major</i> | 54  | 150  | 203  |
| LmjF17.0940 | <i>L. major</i> | 76  | 247  | 322  |
| LmjF17.0940 | <i>L. major</i> | 71  | 430  | 500  |
| LmjF17.0940 | <i>L. major</i> | 105 | 510  | 614  |
| LmjF17.0940 | <i>L. major</i> | 153 | 636  | 788  |
| LmjF17.0940 | <i>L. major</i> | 51  | 943  | 993  |
| LmjF17.0950 | <i>L. major</i> | 66  | 1    | 66   |
| LmjF17.0950 | <i>L. major</i> | 363 | 89   | 451  |
| LmjF17.0950 | <i>L. major</i> | 216 | 492  | 707  |
| LmjF17.0950 | <i>L. major</i> | 76  | 712  | 787  |
| LmjF17.0950 | <i>L. major</i> | 118 | 838  | 955  |
| LmjF17.0950 | <i>L. major</i> | 53  | 1293 | 1345 |
| LmjF17.0950 | <i>L. major</i> | 86  | 1369 | 1454 |
| LmjF17.0950 | <i>L. major</i> | 49  | 1501 | 1549 |
| LmjF17.0960 | <i>L. major</i> | 44  | 1    | 44   |
| LmjF17.0960 | <i>L. major</i> | 316 | 57   | 372  |
| LmjF17.0960 | <i>L. major</i> | 419 | 378  | 796  |
| LmjF17.0960 | <i>L. major</i> | 71  | 807  | 877  |
| LmjF17.0960 | <i>L. major</i> | 59  | 931  | 989  |
| LmjF17.0960 | <i>L. major</i> | 392 | 1187 | 1578 |
| LmjF17.0980 | <i>L. major</i> | 47  | 155  | 201  |
| LmjF17.0980 | <i>L. major</i> | 56  | 633  | 688  |
| LmjF17.0980 | <i>L. major</i> | 56  | 633  | 688  |
| LmjF17.0990 | <i>L. major</i> | 65  | 51   | 115  |
| LmjF17.0990 | <i>L. major</i> | 98  | 150  | 247  |
| LmjF17.0990 | <i>L. major</i> | 57  | 482  | 538  |
| LmjF17.0990 | <i>L. major</i> | 340 | 552  | 891  |
| LmjF17.0990 | <i>L. major</i> | 270 | 936  | 1205 |
| LmjF17.0990 | <i>L. major</i> | 90  | 1225 | 1314 |
| LmjF17.0990 | <i>L. major</i> | 103 | 1410 | 1512 |
| LmjF17.0990 | <i>L. major</i> | 122 | 1708 | 1829 |
| LmjF17.0990 | <i>L. major</i> | 106 | 1926 | 2031 |
| LmjF17.0990 | <i>L. major</i> | 57  | 2330 | 2386 |
| LmjF17.0990 | <i>L. major</i> | 96  | 2588 | 2683 |
| LmjF17.0990 | <i>L. major</i> | 60  | 2716 | 2775 |
| LmjF17.0990 | <i>L. major</i> | 50  | 2881 | 2930 |
| LmjF17.0990 | <i>L. major</i> | 238 | 3125 | 3362 |
| LmjF17.0990 | <i>L. major</i> | 239 | 3369 | 3607 |
| LmjF17.0990 | <i>L. major</i> | 150 | 3625 | 3774 |

|             |                 |     |      |      |
|-------------|-----------------|-----|------|------|
| LmjF17.0990 | <i>L. major</i> | 45  | 3985 | 4029 |
| LmjF17.0990 | <i>L. major</i> | 43  | 4053 | 4095 |
| LmjF17.0990 | <i>L. major</i> | 41  | 4129 | 4169 |
| LmjF17.0990 | <i>L. major</i> | 84  | 4209 | 4292 |
| LmjF17.0990 | <i>L. major</i> | 166 | 4610 | 4775 |
| LmjF17.0990 | <i>L. major</i> | 138 | 4910 | 5047 |
| LmjF17.0990 | <i>L. major</i> | 177 | 5119 | 5295 |
| LmjF17.0990 | <i>L. major</i> | 61  | 5335 | 5395 |
| LmjF17.0990 | <i>L. major</i> | 112 | 5432 | 5543 |
| LmjF17.0990 | <i>L. major</i> | 50  | 5590 | 5639 |
| LmjF17.0990 | <i>L. major</i> | 51  | 5698 | 5748 |
| LmjF17.0990 | <i>L. major</i> | 73  | 5861 | 5933 |
| LmjF17.0990 | <i>L. major</i> | 65  | 5950 | 6014 |
| LmjF17.0990 | <i>L. major</i> | 167 | 6189 | 6355 |
| LmjF17.0990 | <i>L. major</i> | 94  | 6358 | 6451 |
| LmjF17.1000 | <i>L. major</i> | 77  | 1    | 77   |
| LmjF17.1000 | <i>L. major</i> | 87  | 246  | 332  |
| LmjF17.1000 | <i>L. major</i> | 63  | 501  | 563  |
| LmjF17.1030 | <i>L. major</i> | 237 | 1    | 237  |
| LmjF17.1030 | <i>L. major</i> | 47  | 247  | 293  |
| LmjF17.1030 | <i>L. major</i> | 181 | 331  | 511  |
| LmjF17.1030 | <i>L. major</i> | 50  | 773  | 822  |
| LmjF17.1040 | <i>L. major</i> | 62  | 199  | 260  |
| LmjF17.1050 | <i>L. major</i> | 42  | 1    | 42   |
| LmjF17.1060 | <i>L. major</i> | 46  | 317  | 362  |
| LmjF17.1060 | <i>L. major</i> | 152 | 416  | 567  |
| LmjF17.1060 | <i>L. major</i> | 120 | 597  | 716  |
| LmjF17.1070 | <i>L. major</i> | 163 | 1    | 163  |
| LmjF17.1070 | <i>L. major</i> | 100 | 274  | 373  |
| LmjF17.1080 | <i>L. major</i> | 137 | 1    | 137  |
| LmjF17.1080 | <i>L. major</i> | 44  | 160  | 203  |
| LmjF17.1080 | <i>L. major</i> | 120 | 297  | 416  |
| LmjF17.1080 | <i>L. major</i> | 65  | 666  | 730  |
| LmjF17.1090 | <i>L. major</i> | 454 | 1    | 454  |
| LmjF17.1090 | <i>L. major</i> | 73  | 459  | 531  |
| LmjF17.1090 | <i>L. major</i> | 51  | 621  | 671  |
| LmjF17.1090 | <i>L. major</i> | 82  | 815  | 896  |
| LmjF17.1090 | <i>L. major</i> | 63  | 935  | 997  |
| LmjF17.1090 | <i>L. major</i> | 41  | 1122 | 1162 |
| LmjF17.1090 | <i>L. major</i> | 58  | 1208 | 1265 |
| LmjF17.1100 | <i>L. major</i> | 44  | 363  | 406  |
| LmjF17.1110 | <i>L. major</i> | 41  | 229  | 269  |
| LmjF17.1110 | <i>L. major</i> | 65  | 365  | 429  |
| LmjF17.1110 | <i>L. major</i> | 208 | 1170 | 1377 |
| LmjF17.1130 | <i>L. major</i> | 111 | 1    | 111  |
| LmjF17.1130 | <i>L. major</i> | 139 | 168  | 306  |
| LmjF17.1130 | <i>L. major</i> | 57  | 502  | 558  |

|             |                 |      |      |      |
|-------------|-----------------|------|------|------|
| LmjF17.1130 | <i>L. major</i> | 83   | 650  | 732  |
| LmjF17.1130 | <i>L. major</i> | 62   | 903  | 964  |
| LmjF17.1130 | <i>L. major</i> | 54   | 1000 | 1053 |
| LmjF17.1130 | <i>L. major</i> | 100  | 1115 | 1214 |
| LmjF17.1140 | <i>L. major</i> | 1226 | 105  | 1330 |
| LmjF17.1140 | <i>L. major</i> | 59   | 1340 | 1398 |
| LmjF17.1150 | <i>L. major</i> | 41   | 182  | 222  |
| LmjF17.1150 | <i>L. major</i> | 95   | 356  | 450  |
| LmjF17.1150 | <i>L. major</i> | 60   | 506  | 565  |
| LmjF17.1150 | <i>L. major</i> | 40   | 747  | 786  |
| LmjF17.1150 | <i>L. major</i> | 104  | 831  | 934  |
| LmjF17.1150 | <i>L. major</i> | 68   | 949  | 1016 |
| LmjF17.1170 | <i>L. major</i> | 53   | 35   | 87   |
| LmjF17.1170 | <i>L. major</i> | 105  | 138  | 242  |
| LmjF17.1170 | <i>L. major</i> | 336  | 270  | 605  |
| LmjF17.1180 | <i>L. major</i> | 43   | 1    | 43   |
| LmjF17.1180 | <i>L. major</i> | 440  | 204  | 643  |
| LmjF17.1180 | <i>L. major</i> | 219  | 660  | 878  |
| LmjF17.1180 | <i>L. major</i> | 59   | 887  | 945  |
| LmjF17.1190 | <i>L. major</i> | 46   | 1    | 46   |
| LmjF17.1190 | <i>L. major</i> | 98   | 75   | 172  |
| LmjF17.1190 | <i>L. major</i> | 78   | 214  | 291  |
| LmjF17.1190 | <i>L. major</i> | 197  | 323  | 519  |
| LmjF17.1190 | <i>L. major</i> | 122  | 571  | 692  |
| LmjF17.1200 | <i>L. major</i> | 283  | 1    | 283  |
| LmjF17.1200 | <i>L. major</i> | 534  | 300  | 833  |
| LmjF17.1210 | <i>L. major</i> | 57   | 189  | 245  |
| LmjF17.1210 | <i>L. major</i> | 163  | 292  | 454  |
| LmjF17.1220 | <i>L. major</i> | 42   | 1    | 42   |
| LmjF17.1230 | <i>L. major</i> | 41   | 183  | 223  |
| LmjF17.1230 | <i>L. major</i> | 83   | 381  | 463  |
| LmjF17.1230 | <i>L. major</i> | 182  | 661  | 842  |
| LmjF17.1240 | <i>L. major</i> | 47   | 101  | 147  |
| LmjF17.1240 | <i>L. major</i> | 69   | 277  | 345  |
| LmjF17.1240 | <i>L. major</i> | 42   | 730  | 771  |
| LmjF17.1250 | <i>L. major</i> | 49   | 422  | 470  |
| LmjF17.1250 | <i>L. major</i> | 47   | 663  | 709  |
| LmjF17.1250 | <i>L. major</i> | 53   | 957  | 1009 |
| LmjF17.1260 | <i>L. major</i> | 115  | 210  | 324  |
| LmjF17.1260 | <i>L. major</i> | 83   | 359  | 441  |
| LmjF17.1260 | <i>L. major</i> | 83   | 359  | 441  |
| LmjF17.1290 | <i>L. major</i> | 70   | 599  | 668  |
| LmjF17.1310 | <i>L. major</i> | 92   | 115  | 206  |
| LmjF17.1310 | <i>L. major</i> | 120  | 523  | 642  |
| LmjF17.1315 | <i>L. major</i> | 40   | 91   | 130  |
| LmjF17.1315 | <i>L. major</i> | 54   | 180  | 233  |
| LmjF17.1315 | <i>L. major</i> | 72   | 290  | 361  |

|             |                 |     |     |     |
|-------------|-----------------|-----|-----|-----|
| LmjF17.1320 | <i>L. major</i> | 397 | 40  | 436 |
| LmjF17.1350 | <i>L. major</i> | 46  | 38  | 83  |
| LmjF17.1370 | <i>L. major</i> | 75  | 229 | 303 |
| LmjF17.1370 | <i>L. major</i> | 373 | 493 | 865 |
| LmjF17.1380 | <i>L. major</i> | 85  | 1   | 85  |
| LmjF17.1380 | <i>L. major</i> | 80  | 172 | 251 |
| LmjF17.1380 | <i>L. major</i> | 75  | 254 | 328 |
| LmjF17.1380 | <i>L. major</i> | 40  | 638 | 677 |
| LmjF17.1410 | <i>L. major</i> | 43  | 1   | 43  |
| LmjF17.1410 | <i>L. major</i> | 73  | 425 | 497 |
| LmjF17.1420 | <i>L. major</i> | 210 | 48  | 257 |
| LmjF17.1430 | <i>L. major</i> | 58  | 1   | 58  |
| LmjF17.1440 | <i>L. major</i> | 49  | 212 | 260 |
| LmjF17.1440 | <i>L. major</i> | 60  | 559 | 618 |
| LmjF17.1440 | <i>L. major</i> | 60  | 559 | 618 |
| LmjF17.1450 | <i>L. major</i> | 69  | 72  | 140 |
| LmjF17.1470 | <i>L. major</i> | 191 | 53  | 243 |
| LmjF18.0010 | <i>L. major</i> | 60  | 682 | 741 |
| LmjF18.0020 | <i>L. major</i> | 49  | 192 | 240 |
| LmjF18.0030 | <i>L. major</i> | 54  | 85  | 138 |
| LmjF18.0060 | <i>L. major</i> | 43  | 115 | 157 |
| LmjF18.0070 | <i>L. major</i> | 52  | 109 | 160 |
| LmjF18.0070 | <i>L. major</i> | 154 | 188 | 341 |
| LmjF18.0070 | <i>L. major</i> | 49  | 365 | 413 |
| LmjF18.0070 | <i>L. major</i> | 46  | 427 | 472 |
| LmjF18.0070 | <i>L. major</i> | 89  | 497 | 585 |
| LmjF18.0070 | <i>L. major</i> | 132 | 592 | 723 |
| LmjF18.0080 | <i>L. major</i> | 41  | 403 | 443 |
| LmjF18.0100 | <i>L. major</i> | 89  | 124 | 212 |
| LmjF18.0130 | <i>L. major</i> | 45  | 357 | 401 |
| LmjF18.0130 | <i>L. major</i> | 54  | 635 | 688 |
| LmjF18.0130 | <i>L. major</i> | 54  | 635 | 688 |
| LmjF18.0140 | <i>L. major</i> | 42  | 545 | 586 |
| LmjF18.0140 | <i>L. major</i> | 51  | 696 | 746 |
| LmjF18.0140 | <i>L. major</i> | 51  | 696 | 746 |
| LmjF18.0170 | <i>L. major</i> | 141 | 207 | 347 |
| LmjF18.0180 | <i>L. major</i> | 92  | 197 | 288 |
| LmjF18.0190 | <i>L. major</i> | 52  | 195 | 246 |
| LmjF18.0190 | <i>L. major</i> | 43  | 253 | 295 |
| LmjF18.0190 | <i>L. major</i> | 43  | 253 | 295 |
| LmjF18.0210 | <i>L. major</i> | 63  | 169 | 231 |
| LmjF18.0220 | <i>L. major</i> | 329 | 81  | 409 |
| LmjF18.0230 | <i>L. major</i> | 112 | 1   | 112 |
| LmjF18.0240 | <i>L. major</i> | 48  | 183 | 230 |
| LmjF18.0240 | <i>L. major</i> | 76  | 250 | 325 |
| LmjF18.0240 | <i>L. major</i> | 76  | 250 | 325 |
| LmjF18.0250 | <i>L. major</i> | 68  | 1   | 68  |

|             |                 |     |      |      |
|-------------|-----------------|-----|------|------|
| LmjF18.0250 | <i>L. major</i> | 46  | 97   | 142  |
| LmjF18.0270 | <i>L. major</i> | 43  | 1    | 43   |
| LmjF18.0280 | <i>L. major</i> | 45  | 1    | 45   |
| LmjF18.0290 | <i>L. major</i> | 40  | 188  | 227  |
| LmjF18.0300 | <i>L. major</i> | 124 | 133  | 256  |
| LmjF18.0300 | <i>L. major</i> | 54  | 313  | 366  |
| LmjF18.0330 | <i>L. major</i> | 100 | 75   | 174  |
| LmjF18.0340 | <i>L. major</i> | 46  | 102  | 147  |
| LmjF18.0340 | <i>L. major</i> | 64  | 289  | 352  |
| LmjF18.0340 | <i>L. major</i> | 64  | 289  | 352  |
| LmjF18.0350 | <i>L. major</i> | 41  | 1    | 41   |
| LmjF18.0370 | <i>L. major</i> | 44  | 167  | 210  |
| LmjF18.0380 | <i>L. major</i> | 71  | 307  | 377  |
| LmjF18.0390 | <i>L. major</i> | 172 | 1    | 172  |
| LmjF18.0390 | <i>L. major</i> | 71  | 198  | 268  |
| LmjF18.0390 | <i>L. major</i> | 897 | 282  | 1178 |
| LmjF18.0390 | <i>L. major</i> | 171 | 1216 | 1386 |
| LmjF18.0390 | <i>L. major</i> | 176 | 1565 | 1740 |
| LmjF18.0400 | <i>L. major</i> | 134 | 102  | 235  |
| LmjF18.0410 | <i>L. major</i> | 131 | 70   | 200  |
| LmjF18.0420 | <i>L. major</i> | 53  | 46   | 98   |
| LmjF18.0430 | <i>L. major</i> | 147 | 77   | 223  |
| LmjF18.0440 | <i>L. major</i> | 126 | 102  | 227  |
| LmjF18.0460 | <i>L. major</i> | 46  | 108  | 153  |
| LmjF18.0470 | <i>L. major</i> | 63  | 1    | 63   |
| LmjF18.0470 | <i>L. major</i> | 211 | 123  | 333  |
| LmjF18.0490 | <i>L. major</i> | 88  | 155  | 242  |
| LmjF18.0500 | <i>L. major</i> | 121 | 1    | 121  |
| LmjF18.0500 | <i>L. major</i> | 79  | 301  | 379  |
| LmjF18.0520 | <i>L. major</i> | 46  | 1    | 46   |
| LmjF18.0520 | <i>L. major</i> | 175 | 79   | 253  |
| LmjF18.0520 | <i>L. major</i> | 358 | 275  | 632  |
| LmjF18.0530 | <i>L. major</i> | 44  | 130  | 173  |
| LmjF18.0530 | <i>L. major</i> | 137 | 386  | 522  |
| LmjF18.0540 | <i>L. major</i> | 95  | 419  | 513  |
| LmjF18.0550 | <i>L. major</i> | 105 | 221  | 325  |
| LmjF18.0570 | <i>L. major</i> | 51  | 556  | 606  |
| LmjF18.0570 | <i>L. major</i> | 50  | 638  | 687  |
| LmjF18.0570 | <i>L. major</i> | 50  | 638  | 687  |
| LmjF18.0590 | <i>L. major</i> | 168 | 1    | 168  |
| LmjF18.0590 | <i>L. major</i> | 173 | 245  | 417  |
| LmjF18.0600 | <i>L. major</i> | 323 | 1    | 323  |
| LmjF18.0600 | <i>L. major</i> | 212 | 352  | 563  |
| LmjF18.0630 | <i>L. major</i> | 495 | 1    | 495  |
| LmjF18.0650 | <i>L. major</i> | 109 | 56   | 164  |
| LmjF18.0650 | <i>L. major</i> | 46  | 195  | 240  |
| LmjF18.0650 | <i>L. major</i> | 62  | 254  | 315  |

|             |                 |     |      |      |
|-------------|-----------------|-----|------|------|
| LmjF18.0650 | <i>L. major</i> | 54  | 363  | 416  |
| LmjF18.0650 | <i>L. major</i> | 71  | 448  | 518  |
| LmjF18.0650 | <i>L. major</i> | 98  | 611  | 708  |
| LmjF18.0650 | <i>L. major</i> | 84  | 811  | 894  |
| LmjF18.0650 | <i>L. major</i> | 58  | 996  | 1053 |
| LmjF18.0650 | <i>L. major</i> | 77  | 1194 | 1270 |
| LmjF18.0680 | <i>L. major</i> | 50  | 1    | 50   |
| LmjF18.0690 | <i>L. major</i> | 192 | 1    | 192  |
| LmjF18.0690 | <i>L. major</i> | 124 | 456  | 579  |
| LmjF18.0690 | <i>L. major</i> | 69  | 591  | 659  |
| LmjF18.0700 | <i>L. major</i> | 116 | 596  | 711  |
| LmjF18.0710 | <i>L. major</i> | 99  | 104  | 202  |
| LmjF18.0710 | <i>L. major</i> | 57  | 276  | 332  |
| LmjF18.0710 | <i>L. major</i> | 45  | 373  | 417  |
| LmjF18.0710 | <i>L. major</i> | 50  | 454  | 503  |
| LmjF18.0710 | <i>L. major</i> | 117 | 540  | 656  |
| LmjF18.0710 | <i>L. major</i> | 118 | 824  | 941  |
| LmjF18.0710 | <i>L. major</i> | 43  | 1000 | 1042 |
| LmjF18.0710 | <i>L. major</i> | 113 | 1178 | 1290 |
| LmjF18.0710 | <i>L. major</i> | 266 | 1299 | 1564 |
| LmjF18.0720 | <i>L. major</i> | 102 | 146  | 247  |
| LmjF18.0720 | <i>L. major</i> | 128 | 376  | 503  |
| LmjF18.0720 | <i>L. major</i> | 102 | 619  | 720  |
| LmjF18.0730 | <i>L. major</i> | 111 | 1    | 111  |
| LmjF18.0740 | <i>L. major</i> | 44  | 360  | 403  |
| LmjF18.0750 | <i>L. major</i> | 212 | 62   | 273  |
| LmjF18.0750 | <i>L. major</i> | 109 | 376  | 484  |
| LmjF18.0750 | <i>L. major</i> | 48  | 518  | 565  |
| LmjF18.0770 | <i>L. major</i> | 45  | 18   | 62   |
| LmjF18.0770 | <i>L. major</i> | 71  | 67   | 137  |
| LmjF18.0770 | <i>L. major</i> | 308 | 214  | 521  |
| LmjF18.0770 | <i>L. major</i> | 157 | 632  | 788  |
| LmjF18.0770 | <i>L. major</i> | 205 | 899  | 1103 |
| LmjF18.0770 | <i>L. major</i> | 246 | 1141 | 1386 |
| LmjF18.0770 | <i>L. major</i> | 107 | 1530 | 1636 |
| LmjF18.0790 | <i>L. major</i> | 60  | 65   | 124  |
| LmjF18.0790 | <i>L. major</i> | 99  | 128  | 226  |
| LmjF18.0800 | <i>L. major</i> | 59  | 1    | 59   |
| LmjF18.0800 | <i>L. major</i> | 51  | 71   | 121  |
| LmjF18.0800 | <i>L. major</i> | 51  | 71   | 121  |
| LmjF18.0820 | <i>L. major</i> | 59  | 29   | 87   |
| LmjF18.0820 | <i>L. major</i> | 47  | 156  | 202  |
| LmjF18.0820 | <i>L. major</i> | 64  | 445  | 508  |
| LmjF18.0820 | <i>L. major</i> | 58  | 1825 | 1882 |
| LmjF18.0840 | <i>L. major</i> | 229 | 113  | 341  |
| LmjF18.0840 | <i>L. major</i> | 123 | 362  | 484  |
| LmjF18.0840 | <i>L. major</i> | 68  | 531  | 598  |

|             |                 |     |      |      |
|-------------|-----------------|-----|------|------|
| LmjF18.0840 | <i>L. major</i> | 81  | 614  | 694  |
| LmjF18.0840 | <i>L. major</i> | 84  | 735  | 818  |
| LmjF18.0840 | <i>L. major</i> | 122 | 857  | 978  |
| LmjF18.0840 | <i>L. major</i> | 238 | 1035 | 1272 |
| LmjF18.0840 | <i>L. major</i> | 177 | 1394 | 1570 |
| LmjF18.0840 | <i>L. major</i> | 219 | 1623 | 1841 |
| LmjF18.0840 | <i>L. major</i> | 96  | 1930 | 2025 |
| LmjF18.0850 | <i>L. major</i> | 236 | 1    | 236  |
| LmjF18.0850 | <i>L. major</i> | 61  | 308  | 368  |
| LmjF18.0850 | <i>L. major</i> | 97  | 408  | 504  |
| LmjF18.0850 | <i>L. major</i> | 86  | 687  | 772  |
| LmjF18.0850 | <i>L. major</i> | 334 | 848  | 1181 |
| LmjF18.0850 | <i>L. major</i> | 41  | 1278 | 1318 |
| LmjF18.0850 | <i>L. major</i> | 157 | 1517 | 1673 |
| LmjF18.0850 | <i>L. major</i> | 161 | 1699 | 1859 |
| LmjF18.0850 | <i>L. major</i> | 87  | 1904 | 1990 |
| LmjF18.0850 | <i>L. major</i> | 82  | 2158 | 2239 |
| LmjF18.0850 | <i>L. major</i> | 143 | 2274 | 2416 |
| LmjF18.0850 | <i>L. major</i> | 116 | 2471 | 2586 |
| LmjF18.0850 | <i>L. major</i> | 51  | 2674 | 2724 |
| LmjF18.0850 | <i>L. major</i> | 93  | 2734 | 2826 |
| LmjF18.0860 | <i>L. major</i> | 49  | 1    | 49   |
| LmjF18.0860 | <i>L. major</i> | 84  | 100  | 183  |
| LmjF18.0860 | <i>L. major</i> | 43  | 239  | 281  |
| LmjF18.0860 | <i>L. major</i> | 60  | 329  | 388  |
| LmjF18.0860 | <i>L. major</i> | 82  | 632  | 713  |
| LmjF18.0860 | <i>L. major</i> | 123 | 785  | 907  |
| LmjF18.0870 | <i>L. major</i> | 59  | 94   | 152  |
| LmjF18.0870 | <i>L. major</i> | 41  | 195  | 235  |
| LmjF18.0870 | <i>L. major</i> | 152 | 316  | 467  |
| LmjF18.0880 | <i>L. major</i> | 44  | 79   | 122  |
| LmjF18.0880 | <i>L. major</i> | 71  | 499  | 569  |
| LmjF18.0880 | <i>L. major</i> | 177 | 657  | 833  |
| LmjF18.0900 | <i>L. major</i> | 94  | 36   | 129  |
| LmjF18.0900 | <i>L. major</i> | 41  | 517  | 557  |
| LmjF18.0910 | <i>L. major</i> | 80  | 55   | 134  |
| LmjF18.0910 | <i>L. major</i> | 57  | 168  | 224  |
| LmjF18.0910 | <i>L. major</i> | 54  | 294  | 347  |
| LmjF18.0910 | <i>L. major</i> | 211 | 896  | 1106 |
| LmjF18.0920 | <i>L. major</i> | 62  | 1    | 62   |
| LmjF18.0920 | <i>L. major</i> | 68  | 432  | 499  |
| LmjF18.0920 | <i>L. major</i> | 77  | 528  | 604  |
| LmjF18.0930 | <i>L. major</i> | 83  | 90   | 172  |
| LmjF18.0930 | <i>L. major</i> | 293 | 246  | 538  |
| LmjF18.0930 | <i>L. major</i> | 281 | 560  | 840  |
| LmjF18.0940 | <i>L. major</i> | 48  | 144  | 191  |
| LmjF18.0940 | <i>L. major</i> | 143 | 1138 | 1280 |

|             |                 |     |      |      |
|-------------|-----------------|-----|------|------|
| LmjF18.0950 | <i>L. major</i> | 201 | 1    | 201  |
| LmjF18.0950 | <i>L. major</i> | 46  | 209  | 254  |
| LmjF18.0950 | <i>L. major</i> | 62  | 303  | 364  |
| LmjF18.0970 | <i>L. major</i> | 915 | 1    | 915  |
| LmjF18.0970 | <i>L. major</i> | 115 | 1160 | 1274 |
| LmjF18.0970 | <i>L. major</i> | 81  | 1384 | 1464 |
| LmjF18.0970 | <i>L. major</i> | 113 | 1479 | 1591 |
| LmjF18.0970 | <i>L. major</i> | 103 | 1601 | 1703 |
| LmjF18.0970 | <i>L. major</i> | 85  | 1725 | 1809 |
| LmjF18.0970 | <i>L. major</i> | 209 | 1845 | 2053 |
| LmjF18.0980 | <i>L. major</i> | 191 | 1    | 191  |
| LmjF18.1000 | <i>L. major</i> | 41  | 1    | 41   |
| LmjF18.1020 | <i>L. major</i> | 51  | 1    | 51   |
| LmjF18.1020 | <i>L. major</i> | 233 | 102  | 334  |
| LmjF18.1020 | <i>L. major</i> | 69  | 345  | 413  |
| LmjF18.1020 | <i>L. major</i> | 63  | 430  | 492  |
| LmjF18.1020 | <i>L. major</i> | 54  | 511  | 564  |
| LmjF18.1020 | <i>L. major</i> | 176 | 570  | 745  |
| LmjF18.1020 | <i>L. major</i> | 378 | 840  | 1217 |
| LmjF18.1020 | <i>L. major</i> | 102 | 1222 | 1323 |
| LmjF18.1030 | <i>L. major</i> | 73  | 116  | 188  |
| LmjF18.1040 | <i>L. major</i> | 43  | 668  | 710  |
| LmjF18.1050 | <i>L. major</i> | 86  | 1    | 86   |
| LmjF18.1050 | <i>L. major</i> | 54  | 423  | 476  |
| LmjF18.1050 | <i>L. major</i> | 52  | 629  | 680  |
| LmjF18.1050 | <i>L. major</i> | 49  | 863  | 911  |
| LmjF18.1050 | <i>L. major</i> | 54  | 1132 | 1185 |
| LmjF18.1050 | <i>L. major</i> | 43  | 1381 | 1423 |
| LmjF18.1060 | <i>L. major</i> | 40  | 512  | 551  |
| LmjF18.1090 | <i>L. major</i> | 78  | 174  | 251  |
| LmjF18.1100 | <i>L. major</i> | 57  | 42   | 98   |
| LmjF18.1110 | <i>L. major</i> | 46  | 160  | 205  |
| LmjF18.1120 | <i>L. major</i> | 103 | 85   | 187  |
| LmjF18.1140 | <i>L. major</i> | 920 | 26   | 945  |
| LmjF18.1150 | <i>L. major</i> | 105 | 1    | 105  |
| LmjF18.1150 | <i>L. major</i> | 44  | 157  | 200  |
| LmjF18.1180 | <i>L. major</i> | 129 | 1    | 129  |
| LmjF18.1180 | <i>L. major</i> | 188 | 165  | 352  |
| LmjF18.1180 | <i>L. major</i> | 88  | 385  | 472  |
| LmjF18.1180 | <i>L. major</i> | 49  | 499  | 547  |
| LmjF18.1180 | <i>L. major</i> | 197 | 584  | 780  |
| LmjF18.1180 | <i>L. major</i> | 476 | 817  | 1292 |
| LmjF18.1190 | <i>L. major</i> | 73  | 35   | 107  |
| LmjF18.1190 | <i>L. major</i> | 42  | 343  | 384  |
| LmjF18.1190 | <i>L. major</i> | 53  | 408  | 460  |
| LmjF18.1190 | <i>L. major</i> | 55  | 707  | 761  |
| LmjF18.1190 | <i>L. major</i> | 46  | 935  | 980  |



|             |                 |     |      |      |
|-------------|-----------------|-----|------|------|
| LmjF18.1190 | <i>L. major</i> | 49  | 1211 | 1259 |
| LmjF18.1200 | <i>L. major</i> | 182 | 42   | 223  |
| LmjF18.1210 | <i>L. major</i> | 48  | 175  | 222  |
| LmjF18.1210 | <i>L. major</i> | 47  | 664  | 710  |
| LmjF18.1220 | <i>L. major</i> | 48  | 175  | 222  |
| LmjF18.1220 | <i>L. major</i> | 47  | 664  | 710  |
| LmjF18.1230 | <i>L. major</i> | 115 | 79   | 193  |
| LmjF18.1230 | <i>L. major</i> | 74  | 479  | 552  |
| LmjF18.1230 | <i>L. major</i> | 74  | 479  | 552  |
| LmjF18.1240 | <i>L. major</i> | 100 | 1    | 100  |
| LmjF18.1240 | <i>L. major</i> | 60  | 155  | 214  |
| LmjF18.1240 | <i>L. major</i> | 102 | 269  | 370  |
| LmjF18.1240 | <i>L. major</i> | 204 | 464  | 667  |
| LmjF18.1240 | <i>L. major</i> | 82  | 678  | 759  |
| LmjF18.1250 | <i>L. major</i> | 53  | 1    | 53   |
| LmjF18.1250 | <i>L. major</i> | 92  | 124  | 215  |
| LmjF18.1250 | <i>L. major</i> | 170 | 217  | 386  |
| LmjF18.1250 | <i>L. major</i> | 98  | 419  | 516  |
| LmjF18.1250 | <i>L. major</i> | 162 | 531  | 692  |
| LmjF18.1250 | <i>L. major</i> | 54  | 743  | 796  |
| LmjF18.1310 | <i>L. major</i> | 114 | 58   | 171  |
| LmjF18.1310 | <i>L. major</i> | 93  | 235  | 327  |
| LmjF18.1310 | <i>L. major</i> | 75  | 413  | 487  |
| LmjF18.1310 | <i>L. major</i> | 123 | 601  | 723  |
| LmjF18.1320 | <i>L. major</i> | 390 | 1    | 390  |
| LmjF18.1320 | <i>L. major</i> | 62  | 550  | 611  |
| LmjF18.1330 | <i>L. major</i> | 43  | 115  | 157  |
| LmjF18.1340 | <i>L. major</i> | 173 | 1    | 173  |
| LmjF18.1340 | <i>L. major</i> | 208 | 202  | 409  |
| LmjF18.1340 | <i>L. major</i> | 78  | 561  | 638  |
| LmjF18.1340 | <i>L. major</i> | 104 | 665  | 768  |
| LmjF18.1350 | <i>L. major</i> | 85  | 1    | 85   |
| LmjF18.1350 | <i>L. major</i> | 158 | 124  | 281  |
| LmjF18.1350 | <i>L. major</i> | 148 | 440  | 587  |
| LmjF18.1360 | <i>L. major</i> | 229 | 1    | 229  |
| LmjF18.1360 | <i>L. major</i> | 55  | 240  | 294  |
| LmjF18.1360 | <i>L. major</i> | 611 | 350  | 960  |
| LmjF18.1370 | <i>L. major</i> | 63  | 512  | 574  |
| LmjF18.1370 | <i>L. major</i> | 119 | 705  | 823  |
| LmjF18.1380 | <i>L. major</i> | 73  | 282  | 354  |
| LmjF18.1390 | <i>L. major</i> | 53  | 1    | 53   |
| LmjF18.1400 | <i>L. major</i> | 51  | 1    | 51   |
| LmjF18.1400 | <i>L. major</i> | 71  | 98   | 168  |
| LmjF18.1410 | <i>L. major</i> | 563 | 68   | 630  |
| LmjF18.1410 | <i>L. major</i> | 107 | 644  | 750  |
| LmjF18.1410 | <i>L. major</i> | 111 | 801  | 911  |
| LmjF18.1410 | <i>L. major</i> | 88  | 949  | 1036 |

|             |                 |     |      |      |
|-------------|-----------------|-----|------|------|
| LmjF18.1420 | <i>L. major</i> | 78  | 87   | 164  |
| LmjF18.1420 | <i>L. major</i> | 358 | 533  | 890  |
| LmjF18.1430 | <i>L. major</i> | 586 | 76   | 661  |
| LmjF18.1430 | <i>L. major</i> | 404 | 716  | 1119 |
| LmjF18.1450 | <i>L. major</i> | 772 | 1    | 772  |
| LmjF18.1450 | <i>L. major</i> | 65  | 866  | 930  |
| LmjF18.1450 | <i>L. major</i> | 119 | 1063 | 1181 |
| LmjF18.1450 | <i>L. major</i> | 67  | 1277 | 1343 |
| LmjF18.1450 | <i>L. major</i> | 108 | 1403 | 1510 |
| LmjF18.1450 | <i>L. major</i> | 399 | 1566 | 1964 |
| LmjF18.1460 | <i>L. major</i> | 258 | 1    | 258  |
| LmjF18.1460 | <i>L. major</i> | 107 | 295  | 401  |
| LmjF18.1500 | <i>L. major</i> | 83  | 14   | 96   |
| LmjF18.1500 | <i>L. major</i> | 58  | 211  | 268  |
| LmjF18.1500 | <i>L. major</i> | 65  | 379  | 443  |
| LmjF18.1500 | <i>L. major</i> | 70  | 451  | 520  |
| LmjF18.1500 | <i>L. major</i> | 127 | 615  | 741  |
| LmjF18.1510 | <i>L. major</i> | 82  | 1    | 82   |
| LmjF18.1510 | <i>L. major</i> | 72  | 903  | 974  |
| LmjF18.1520 | <i>L. major</i> | 82  | 1    | 82   |
| LmjF18.1520 | <i>L. major</i> | 72  | 903  | 974  |
| LmjF18.1530 | <i>L. major</i> | 187 | 1    | 187  |
| LmjF18.1530 | <i>L. major</i> | 52  | 299  | 350  |
| LmjF18.1530 | <i>L. major</i> | 45  | 466  | 510  |
| LmjF18.1530 | <i>L. major</i> | 113 | 605  | 717  |
| LmjF18.1530 | <i>L. major</i> | 119 | 902  | 1020 |
| LmjF18.1530 | <i>L. major</i> | 213 | 1030 | 1242 |
| LmjF18.1550 | <i>L. major</i> | 65  | 214  | 278  |
| LmjF18.1600 | <i>L. major</i> | 85  | 323  | 407  |
| LmjF18.1600 | <i>L. major</i> | 220 | 577  | 796  |
| LmjF18.1610 | <i>L. major</i> | 153 | 1    | 153  |
| LmjF18.1610 | <i>L. major</i> | 46  | 609  | 654  |
| LmjF18.1630 | <i>L. major</i> | 74  | 49   | 122  |
| LmjF18.1630 | <i>L. major</i> | 40  | 217  | 256  |
| LmjF18.1630 | <i>L. major</i> | 40  | 217  | 256  |
| LmjF18.1650 | <i>L. major</i> | 44  | 76   | 119  |
| LmjF18.1650 | <i>L. major</i> | 56  | 467  | 522  |
| LmjF18.1650 | <i>L. major</i> | 56  | 467  | 522  |
| LmjF18.1660 | <i>L. major</i> | 42  | 223  | 264  |
| LmjF18.1670 | <i>L. major</i> | 93  | 1    | 93   |
| LmjF18.1670 | <i>L. major</i> | 213 | 131  | 343  |
| LmjF18.1670 | <i>L. major</i> | 80  | 399  | 478  |
| LmjF18.1670 | <i>L. major</i> | 66  | 483  | 548  |
| LmjF19.0010 | <i>L. major</i> | 200 | 1    | 200  |
| LmjF19.0020 | <i>L. major</i> | 86  | 1    | 86   |
| LmjF19.0020 | <i>L. major</i> | 154 | 103  | 256  |
| LmjF19.0060 | <i>L. major</i> | 48  | 1    | 48   |

|             |                 |     |      |      |
|-------------|-----------------|-----|------|------|
| LmjF19.0070 | <i>L. major</i> | 152 | 50   | 201  |
| LmjF19.0070 | <i>L. major</i> | 55  | 316  | 370  |
| LmjF19.0080 | <i>L. major</i> | 375 | 58   | 432  |
| LmjF19.0090 | <i>L. major</i> | 64  | 1    | 64   |
| LmjF19.0090 | <i>L. major</i> | 63  | 145  | 207  |
| LmjF19.0090 | <i>L. major</i> | 50  | 244  | 293  |
| LmjF19.0100 | <i>L. major</i> | 63  | 1    | 63   |
| LmjF19.0110 | <i>L. major</i> | 121 | 1    | 121  |
| LmjF19.0120 | <i>L. major</i> | 185 | 14   | 198  |
| LmjF19.0130 | <i>L. major</i> | 41  | 213  | 253  |
| LmjF19.0140 | <i>L. major</i> | 213 | 349  | 561  |
| LmjF19.0170 | <i>L. major</i> | 92  | 118  | 209  |
| LmjF19.0170 | <i>L. major</i> | 40  | 486  | 525  |
| LmjF19.0170 | <i>L. major</i> | 94  | 1398 | 1491 |
| LmjF19.0180 | <i>L. major</i> | 118 | 290  | 407  |
| LmjF19.0190 | <i>L. major</i> | 87  | 1    | 87   |
| LmjF19.0190 | <i>L. major</i> | 46  | 118  | 163  |
| LmjF19.0230 | <i>L. major</i> | 52  | 1    | 52   |
| LmjF19.0230 | <i>L. major</i> | 43  | 204  | 246  |
| LmjF19.0230 | <i>L. major</i> | 43  | 204  | 246  |
| LmjF19.0240 | <i>L. major</i> | 110 | 1    | 110  |
| LmjF19.0240 | <i>L. major</i> | 86  | 435  | 520  |
| LmjF19.0240 | <i>L. major</i> | 54  | 618  | 671  |
| LmjF19.0250 | <i>L. major</i> | 101 | 244  | 344  |
| LmjF19.0250 | <i>L. major</i> | 74  | 657  | 730  |
| LmjF19.0260 | <i>L. major</i> | 40  | 1    | 40   |
| LmjF19.0260 | <i>L. major</i> | 110 | 262  | 371  |
| LmjF19.0270 | <i>L. major</i> | 410 | 1    | 410  |
| LmjF19.0270 | <i>L. major</i> | 323 | 496  | 818  |
| LmjF19.0280 | <i>L. major</i> | 206 | 428  | 633  |
| LmjF19.0290 | <i>L. major</i> | 48  | 39   | 86   |
| LmjF19.0290 | <i>L. major</i> | 75  | 140  | 214  |
| LmjF19.0290 | <i>L. major</i> | 46  | 224  | 269  |
| LmjF19.0290 | <i>L. major</i> | 51  | 325  | 375  |
| LmjF19.0290 | <i>L. major</i> | 45  | 477  | 521  |
| LmjF19.0290 | <i>L. major</i> | 46  | 586  | 631  |
| LmjF19.0290 | <i>L. major</i> | 85  | 664  | 748  |
| LmjF19.0290 | <i>L. major</i> | 81  | 943  | 1023 |
| LmjF19.0290 | <i>L. major</i> | 117 | 1025 | 1141 |
| LmjF19.0290 | <i>L. major</i> | 81  | 1199 | 1279 |
| LmjF19.0300 | <i>L. major</i> | 96  | 136  | 231  |
| LmjF19.0310 | <i>L. major</i> | 40  | 99   | 138  |
| LmjF19.0320 | <i>L. major</i> | 41  | 1    | 41   |
| LmjF19.0320 | <i>L. major</i> | 70  | 180  | 249  |
| LmjF19.0320 | <i>L. major</i> | 43  | 414  | 456  |
| LmjF19.0340 | <i>L. major</i> | 109 | 81   | 189  |
| LmjF19.0350 | <i>L. major</i> | 41  | 1    | 41   |

|             |                 |     |      |      |
|-------------|-----------------|-----|------|------|
| LmjF19.0350 | <i>L. major</i> | 110 | 52   | 161  |
| LmjF19.0350 | <i>L. major</i> | 110 | 52   | 161  |
| LmjF19.0360 | <i>L. major</i> | 143 | 65   | 207  |
| LmjF19.0360 | <i>L. major</i> | 170 | 235  | 404  |
| LmjF19.0360 | <i>L. major</i> | 553 | 566  | 1118 |
| LmjF19.0360 | <i>L. major</i> | 215 | 1389 | 1603 |
| LmjF19.0360 | <i>L. major</i> | 47  | 1709 | 1755 |
| LmjF19.0360 | <i>L. major</i> | 69  | 1778 | 1846 |
| LmjF19.0370 | <i>L. major</i> | 459 | 1    | 459  |
| LmjF19.0370 | <i>L. major</i> | 170 | 513  | 682  |
| LmjF19.0370 | <i>L. major</i> | 415 | 740  | 1154 |
| LmjF19.0380 | <i>L. major</i> | 71  | 1    | 71   |
| LmjF19.0380 | <i>L. major</i> | 157 | 96   | 252  |
| LmjF19.0380 | <i>L. major</i> | 325 | 453  | 777  |
| LmjF19.0380 | <i>L. major</i> | 64  | 961  | 1024 |
| LmjF19.0380 | <i>L. major</i> | 66  | 1170 | 1235 |
| LmjF19.0380 | <i>L. major</i> | 45  | 1295 | 1339 |
| LmjF19.0380 | <i>L. major</i> | 71  | 1362 | 1432 |
| LmjF19.0380 | <i>L. major</i> | 105 | 1470 | 1574 |
| LmjF19.0380 | <i>L. major</i> | 58  | 1741 | 1798 |
| LmjF19.0380 | <i>L. major</i> | 93  | 1803 | 1895 |
| LmjF19.0390 | <i>L. major</i> | 54  | 1    | 54   |
| LmjF19.0400 | <i>L. major</i> | 45  | 155  | 199  |
| LmjF19.0410 | <i>L. major</i> | 42  | 1    | 42   |
| LmjF19.0420 | <i>L. major</i> | 55  | 61   | 115  |
| LmjF19.0430 | <i>L. major</i> | 220 | 1    | 220  |
| LmjF19.0430 | <i>L. major</i> | 43  | 339  | 381  |
| LmjF19.0430 | <i>L. major</i> | 44  | 684  | 727  |
| LmjF19.0430 | <i>L. major</i> | 50  | 943  | 992  |
| LmjF19.0430 | <i>L. major</i> | 40  | 1027 | 1066 |
| LmjF19.0440 | <i>L. major</i> | 55  | 1    | 55   |
| LmjF19.0440 | <i>L. major</i> | 51  | 300  | 350  |
| LmjF19.0450 | <i>L. major</i> | 212 | 61   | 272  |
| LmjF19.0450 | <i>L. major</i> | 348 | 287  | 634  |
| LmjF19.0450 | <i>L. major</i> | 68  | 702  | 769  |
| LmjF19.0450 | <i>L. major</i> | 60  | 817  | 876  |
| LmjF19.0460 | <i>L. major</i> | 187 | 54   | 240  |
| LmjF19.0470 | <i>L. major</i> | 130 | 68   | 197  |
| LmjF19.0470 | <i>L. major</i> | 102 | 259  | 360  |
| LmjF19.0490 | <i>L. major</i> | 83  | 1    | 83   |
| LmjF19.0500 | <i>L. major</i> | 273 | 27   | 299  |
| LmjF19.0510 | <i>L. major</i> | 138 | 12   | 149  |
| LmjF19.0510 | <i>L. major</i> | 101 | 192  | 292  |
| LmjF19.0510 | <i>L. major</i> | 265 | 314  | 578  |
| LmjF19.0510 | <i>L. major</i> | 127 | 605  | 731  |
| LmjF19.0510 | <i>L. major</i> | 129 | 816  | 944  |
| LmjF19.0510 | <i>L. major</i> | 117 | 1028 | 1144 |

|             |                 |     |      |      |
|-------------|-----------------|-----|------|------|
| LmjF19.0510 | <i>L. major</i> | 160 | 1167 | 1326 |
| LmjF19.0510 | <i>L. major</i> | 109 | 1495 | 1603 |
| LmjF19.0520 | <i>L. major</i> | 78  | 1    | 78   |
| LmjF19.0520 | <i>L. major</i> | 51  | 118  | 168  |
| LmjF19.0520 | <i>L. major</i> | 57  | 268  | 324  |
| LmjF19.0530 | <i>L. major</i> | 169 | 1    | 169  |
| LmjF19.0530 | <i>L. major</i> | 42  | 459  | 500  |
| LmjF19.0530 | <i>L. major</i> | 221 | 526  | 746  |
| LmjF19.0550 | <i>L. major</i> | 67  | 64   | 130  |
| LmjF19.0560 | <i>L. major</i> | 82  | 132  | 213  |
| LmjF19.0560 | <i>L. major</i> | 136 | 268  | 403  |
| LmjF19.0560 | <i>L. major</i> | 109 | 584  | 692  |
| LmjF19.0560 | <i>L. major</i> | 93  | 1069 | 1161 |
| LmjF19.0560 | <i>L. major</i> | 65  | 1201 | 1265 |
| LmjF19.0570 | <i>L. major</i> | 42  | 1    | 42   |
| LmjF19.0580 | <i>L. major</i> | 671 | 1    | 671  |
| LmjF19.0580 | <i>L. major</i> | 57  | 758  | 814  |
| LmjF19.0580 | <i>L. major</i> | 43  | 1050 | 1092 |
| LmjF19.0580 | <i>L. major</i> | 58  | 1141 | 1198 |
| LmjF19.0580 | <i>L. major</i> | 103 | 1295 | 1397 |
| LmjF19.0580 | <i>L. major</i> | 67  | 1808 | 1874 |
| LmjF19.0580 | <i>L. major</i> | 50  | 2076 | 2125 |
| LmjF19.0580 | <i>L. major</i> | 112 | 2202 | 2313 |
| LmjF19.0580 | <i>L. major</i> | 165 | 2320 | 2484 |
| LmjF19.0580 | <i>L. major</i> | 99  | 2523 | 2621 |
| LmjF19.0580 | <i>L. major</i> | 153 | 2636 | 2788 |
| LmjF19.0590 | <i>L. major</i> | 99  | 1    | 99   |
| LmjF19.0590 | <i>L. major</i> | 127 | 102  | 228  |
| LmjF19.0590 | <i>L. major</i> | 197 | 439  | 635  |
| LmjF19.0590 | <i>L. major</i> | 177 | 710  | 886  |
| LmjF19.0590 | <i>L. major</i> | 172 | 946  | 1117 |
| LmjF19.0600 | <i>L. major</i> | 340 | 1    | 340  |
| LmjF19.0600 | <i>L. major</i> | 115 | 352  | 466  |
| LmjF19.0600 | <i>L. major</i> | 81  | 511  | 591  |
| LmjF19.0600 | <i>L. major</i> | 51  | 713  | 763  |
| LmjF19.0620 | <i>L. major</i> | 74  | 58   | 131  |
| LmjF19.0620 | <i>L. major</i> | 57  | 243  | 299  |
| LmjF19.0620 | <i>L. major</i> | 52  | 428  | 479  |
| LmjF19.0620 | <i>L. major</i> | 47  | 612  | 658  |
| LmjF19.0630 | <i>L. major</i> | 64  | 1    | 64   |
| LmjF19.0650 | <i>L. major</i> | 69  | 69   | 137  |
| LmjF19.0650 | <i>L. major</i> | 50  | 899  | 948  |
| LmjF19.0650 | <i>L. major</i> | 48  | 977  | 1024 |
| LmjF19.0650 | <i>L. major</i> | 44  | 1205 | 1248 |
| LmjF19.0650 | <i>L. major</i> | 48  | 1279 | 1326 |
| LmjF19.0650 | <i>L. major</i> | 64  | 1410 | 1473 |
| LmjF19.0650 | <i>L. major</i> | 261 | 1479 | 1739 |

|             |                 |      |      |      |
|-------------|-----------------|------|------|------|
| LmjF19.0650 | <i>L. major</i> | 132  | 1805 | 1936 |
| LmjF19.0660 | <i>L. major</i> | 124  | 1    | 124  |
| LmjF19.0670 | <i>L. major</i> | 152  | 1    | 152  |
| LmjF19.0670 | <i>L. major</i> | 178  | 184  | 361  |
| LmjF19.0680 | <i>L. major</i> | 55   | 94   | 148  |
| LmjF19.0680 | <i>L. major</i> | 48   | 201  | 248  |
| LmjF19.0680 | <i>L. major</i> | 81   | 560  | 640  |
| LmjF19.0680 | <i>L. major</i> | 212  | 709  | 920  |
| LmjF19.0680 | <i>L. major</i> | 102  | 960  | 1061 |
| LmjF19.0690 | <i>L. major</i> | 56   | 97   | 152  |
| LmjF19.0690 | <i>L. major</i> | 48   | 211  | 258  |
| LmjF19.0690 | <i>L. major</i> | 77   | 576  | 652  |
| LmjF19.0690 | <i>L. major</i> | 221  | 691  | 911  |
| LmjF19.0690 | <i>L. major</i> | 70   | 965  | 1034 |
| LmjF19.0700 | <i>L. major</i> | 77   | 170  | 246  |
| LmjF19.0700 | <i>L. major</i> | 321  | 515  | 835  |
| LmjF19.0700 | <i>L. major</i> | 1332 | 890  | 2221 |
| LmjF19.0720 | <i>L. major</i> | 154  | 94   | 247  |
| LmjF19.0730 | <i>L. major</i> | 92   | 294  | 385  |
| LmjF19.0740 | <i>L. major</i> | 109  | 125  | 233  |
| LmjF19.0740 | <i>L. major</i> | 62   | 343  | 404  |
| LmjF19.0750 | <i>L. major</i> | 64   | 36   | 99   |
| LmjF19.0750 | <i>L. major</i> | 47   | 120  | 166  |
| LmjF19.0750 | <i>L. major</i> | 53   | 466  | 518  |
| LmjF19.0760 | <i>L. major</i> | 63   | 166  | 228  |
| LmjF19.0760 | <i>L. major</i> | 41   | 331  | 371  |
| LmjF19.0760 | <i>L. major</i> | 41   | 331  | 371  |
| LmjF19.0770 | <i>L. major</i> | 45   | 142  | 186  |
| LmjF19.0790 | <i>L. major</i> | 80   | 369  | 448  |
| LmjF19.0790 | <i>L. major</i> | 151  | 590  | 740  |
| LmjF19.0800 | <i>L. major</i> | 63   | 1    | 63   |
| LmjF19.0800 | <i>L. major</i> | 50   | 310  | 359  |
| LmjF19.0810 | <i>L. major</i> | 45   | 48   | 92   |
| LmjF19.0810 | <i>L. major</i> | 47   | 462  | 508  |
| LmjF19.0810 | <i>L. major</i> | 140  | 730  | 869  |
| LmjF19.0840 | <i>L. major</i> | 41   | 1    | 41   |
| LmjF19.0844 | <i>L. major</i> | 41   | 1    | 41   |
| LmjF19.0848 | <i>L. major</i> | 41   | 1    | 41   |
| LmjF19.0920 | <i>L. major</i> | 69   | 281  | 349  |
| LmjF19.0930 | <i>L. major</i> | 53   | 1    | 53   |
| LmjF19.0930 | <i>L. major</i> | 67   | 72   | 138  |
| LmjF19.0930 | <i>L. major</i> | 80   | 382  | 461  |
| LmjF19.0930 | <i>L. major</i> | 166  | 518  | 683  |
| LmjF19.0930 | <i>L. major</i> | 70   | 693  | 762  |
| LmjF19.0930 | <i>L. major</i> | 49   | 862  | 910  |
| LmjF19.0940 | <i>L. major</i> | 487  | 96   | 582  |
| LmjF19.0950 | <i>L. major</i> | 255  | 118  | 372  |

|             |                 |     |      |      |
|-------------|-----------------|-----|------|------|
| LmjF19.0950 | <i>L. major</i> | 69  | 376  | 444  |
| LmjF19.0950 | <i>L. major</i> | 210 | 481  | 690  |
| LmjF19.0980 | <i>L. major</i> | 50  | 1    | 50   |
| LmjF19.0980 | <i>L. major</i> | 398 | 93   | 490  |
| LmjF19.0980 | <i>L. major</i> | 48  | 560  | 607  |
| LmjF19.0980 | <i>L. major</i> | 84  | 755  | 838  |
| LmjF19.0985 | <i>L. major</i> | 43  | 571  | 613  |
| LmjF19.1000 | <i>L. major</i> | 44  | 72   | 115  |
| LmjF19.1000 | <i>L. major</i> | 43  | 534  | 576  |
| LmjF19.1000 | <i>L. major</i> | 43  | 534  | 576  |
| LmjF19.1005 | <i>L. major</i> | 89  | 515  | 603  |
| LmjF19.1010 | <i>L. major</i> | 76  | 67   | 142  |
| LmjF19.1010 | <i>L. major</i> | 47  | 247  | 293  |
| LmjF19.1010 | <i>L. major</i> | 97  | 341  | 437  |
| LmjF19.1010 | <i>L. major</i> | 85  | 447  | 531  |
| LmjF19.1010 | <i>L. major</i> | 163 | 582  | 744  |
| LmjF19.1020 | <i>L. major</i> | 71  | 1    | 71   |
| LmjF19.1020 | <i>L. major</i> | 55  | 321  | 375  |
| LmjF19.1020 | <i>L. major</i> | 55  | 321  | 375  |
| LmjF19.1030 | <i>L. major</i> | 286 | 1    | 286  |
| LmjF19.1040 | <i>L. major</i> | 44  | 304  | 347  |
| LmjF19.1050 | <i>L. major</i> | 48  | 1    | 48   |
| LmjF19.1050 | <i>L. major</i> | 457 | 99   | 555  |
| LmjF19.1050 | <i>L. major</i> | 244 | 674  | 917  |
| LmjF19.1050 | <i>L. major</i> | 229 | 988  | 1216 |
| LmjF19.1060 | <i>L. major</i> | 113 | 12   | 124  |
| LmjF19.1060 | <i>L. major</i> | 260 | 208  | 467  |
| LmjF19.1060 | <i>L. major</i> | 83  | 501  | 583  |
| LmjF19.1060 | <i>L. major</i> | 152 | 643  | 794  |
| LmjF19.1060 | <i>L. major</i> | 163 | 833  | 995  |
| LmjF19.1060 | <i>L. major</i> | 219 | 1032 | 1250 |
| LmjF19.1070 | <i>L. major</i> | 77  | 75   | 151  |
| LmjF19.1070 | <i>L. major</i> | 63  | 188  | 250  |
| LmjF19.1070 | <i>L. major</i> | 43  | 350  | 392  |
| LmjF19.1070 | <i>L. major</i> | 251 | 475  | 725  |
| LmjF19.1070 | <i>L. major</i> | 45  | 902  | 946  |
| LmjF19.1080 | <i>L. major</i> | 84  | 36   | 119  |
| LmjF19.1080 | <i>L. major</i> | 62  | 178  | 239  |
| LmjF19.1080 | <i>L. major</i> | 91  | 295  | 385  |
| LmjF19.1080 | <i>L. major</i> | 138 | 400  | 537  |
| LmjF19.1080 | <i>L. major</i> | 47  | 560  | 606  |
| LmjF19.1080 | <i>L. major</i> | 218 | 665  | 882  |
| LmjF19.1080 | <i>L. major</i> | 847 | 1015 | 1861 |
| LmjF19.1080 | <i>L. major</i> | 269 | 1867 | 2135 |
| LmjF19.1080 | <i>L. major</i> | 48  | 2178 | 2225 |
| LmjF19.1080 | <i>L. major</i> | 55  | 2250 | 2304 |
| LmjF19.1080 | <i>L. major</i> | 310 | 2608 | 2917 |

|             |                 |     |      |      |
|-------------|-----------------|-----|------|------|
| LmjF19.1080 | <i>L. major</i> | 97  | 2958 | 3054 |
| LmjF19.1080 | <i>L. major</i> | 41  | 3554 | 3594 |
| LmjF19.1080 | <i>L. major</i> | 102 | 3616 | 3717 |
| LmjF19.1100 | <i>L. major</i> | 352 | 1    | 352  |
| LmjF19.1100 | <i>L. major</i> | 292 | 359  | 650  |
| LmjF19.1100 | <i>L. major</i> | 213 | 652  | 864  |
| LmjF19.1100 | <i>L. major</i> | 59  | 905  | 963  |
| LmjF19.1100 | <i>L. major</i> | 297 | 1022 | 1318 |
| LmjF19.1130 | <i>L. major</i> | 89  | 1    | 89   |
| LmjF19.1130 | <i>L. major</i> | 165 | 278  | 442  |
| LmjF19.1130 | <i>L. major</i> | 80  | 682  | 761  |
| LmjF19.1130 | <i>L. major</i> | 67  | 801  | 867  |
| LmjF19.1130 | <i>L. major</i> | 73  | 916  | 988  |
| LmjF19.1130 | <i>L. major</i> | 57  | 1069 | 1125 |
| LmjF19.1130 | <i>L. major</i> | 74  | 1231 | 1304 |
| LmjF19.1130 | <i>L. major</i> | 43  | 1359 | 1401 |
| LmjF19.1130 | <i>L. major</i> | 57  | 1411 | 1467 |
| LmjF19.1130 | <i>L. major</i> | 325 | 1532 | 1856 |
| LmjF19.1130 | <i>L. major</i> | 67  | 1990 | 2056 |
| LmjF19.1130 | <i>L. major</i> | 87  | 2318 | 2404 |
| LmjF19.1130 | <i>L. major</i> | 55  | 2678 | 2732 |
| LmjF19.1130 | <i>L. major</i> | 55  | 2829 | 2883 |
| LmjF19.1130 | <i>L. major</i> | 43  | 2979 | 3021 |
| LmjF19.1130 | <i>L. major</i> | 42  | 3088 | 3129 |
| LmjF19.1130 | <i>L. major</i> | 44  | 3263 | 3306 |
| LmjF19.1130 | <i>L. major</i> | 99  | 3409 | 3507 |
| LmjF19.1130 | <i>L. major</i> | 59  | 3566 | 3624 |
| LmjF19.1130 | <i>L. major</i> | 103 | 3690 | 3792 |
| LmjF19.1130 | <i>L. major</i> | 47  | 3824 | 3870 |
| LmjF19.1130 | <i>L. major</i> | 131 | 4017 | 4147 |
| LmjF19.1130 | <i>L. major</i> | 176 | 4289 | 4464 |
| LmjF19.1130 | <i>L. major</i> | 124 | 4481 | 4604 |
| LmjF19.1130 | <i>L. major</i> | 71  | 4727 | 4797 |
| LmjF19.1130 | <i>L. major</i> | 112 | 4926 | 5037 |
| LmjF19.1130 | <i>L. major</i> | 149 | 5143 | 5291 |
| LmjF19.1130 | <i>L. major</i> | 162 | 5321 | 5482 |
| LmjF19.1130 | <i>L. major</i> | 129 | 5558 | 5686 |
| LmjF19.1140 | <i>L. major</i> | 262 | 44   | 305  |
| LmjF19.1140 | <i>L. major</i> | 50  | 334  | 383  |
| LmjF19.1140 | <i>L. major</i> | 57  | 409  | 465  |
| LmjF19.1140 | <i>L. major</i> | 151 | 502  | 652  |
| LmjF19.1140 | <i>L. major</i> | 49  | 698  | 746  |
| LmjF19.1150 | <i>L. major</i> | 806 | 83   | 888  |
| LmjF19.1150 | <i>L. major</i> | 704 | 907  | 1610 |
| LmjF19.1150 | <i>L. major</i> | 136 | 1643 | 1778 |
| LmjF19.1150 | <i>L. major</i> | 639 | 1781 | 2419 |
| LmjF19.1150 | <i>L. major</i> | 102 | 2421 | 2522 |



|             |                 |     |      |      |
|-------------|-----------------|-----|------|------|
| LmjF19.1150 | <i>L. major</i> | 123 | 2534 | 2656 |
| LmjF19.1160 | <i>L. major</i> | 107 | 56   | 162  |
| LmjF19.1160 | <i>L. major</i> | 64  | 226  | 289  |
| LmjF19.1160 | <i>L. major</i> | 73  | 297  | 369  |
| LmjF19.1170 | <i>L. major</i> | 47  | 1    | 47   |
| LmjF19.1170 | <i>L. major</i> | 570 | 61   | 630  |
| LmjF19.1170 | <i>L. major</i> | 268 | 661  | 928  |
| LmjF19.1180 | <i>L. major</i> | 136 | 1    | 136  |
| LmjF19.1180 | <i>L. major</i> | 490 | 162  | 651  |
| LmjF19.1180 | <i>L. major</i> | 88  | 723  | 810  |
| LmjF19.1180 | <i>L. major</i> | 255 | 924  | 1178 |
| LmjF19.1180 | <i>L. major</i> | 139 | 1202 | 1340 |
| LmjF19.1180 | <i>L. major</i> | 329 | 1355 | 1683 |
| LmjF19.1210 | <i>L. major</i> | 48  | 1    | 48   |
| LmjF19.1220 | <i>L. major</i> | 99  | 134  | 232  |
| LmjF19.1230 | <i>L. major</i> | 48  | 61   | 108  |
| LmjF19.1230 | <i>L. major</i> | 168 | 153  | 320  |
| LmjF19.1240 | <i>L. major</i> | 42  | 70   | 111  |
| LmjF19.1240 | <i>L. major</i> | 40  | 148  | 187  |
| LmjF19.1240 | <i>L. major</i> | 136 | 223  | 358  |
| LmjF19.1240 | <i>L. major</i> | 58  | 463  | 520  |
| LmjF19.1240 | <i>L. major</i> | 52  | 757  | 808  |
| LmjF19.1240 | <i>L. major</i> | 75  | 980  | 1054 |
| LmjF19.1240 | <i>L. major</i> | 86  | 1277 | 1362 |
| LmjF19.1240 | <i>L. major</i> | 184 | 1437 | 1620 |
| LmjF19.1240 | <i>L. major</i> | 85  | 1772 | 1856 |
| LmjF19.1250 | <i>L. major</i> | 56  | 87   | 142  |
| LmjF19.1250 | <i>L. major</i> | 45  | 155  | 199  |
| LmjF19.1250 | <i>L. major</i> | 40  | 368  | 407  |
| LmjF19.1260 | <i>L. major</i> | 64  | 47   | 110  |
| LmjF19.1270 | <i>L. major</i> | 107 | 121  | 227  |
| LmjF19.1300 | <i>L. major</i> | 63  | 118  | 180  |
| LmjF19.1310 | <i>L. major</i> | 227 | 31   | 257  |
| LmjF19.1310 | <i>L. major</i> | 164 | 293  | 456  |
| LmjF19.1310 | <i>L. major</i> | 103 | 466  | 568  |
| LmjF19.1310 | <i>L. major</i> | 174 | 597  | 770  |
| LmjF19.1310 | <i>L. major</i> | 88  | 869  | 956  |
| LmjF19.1330 | <i>L. major</i> | 40  | 135  | 174  |
| LmjF19.1340 | <i>L. major</i> | 53  | 1    | 53   |
| LmjF19.1340 | <i>L. major</i> | 40  | 169  | 208  |
| LmjF19.1340 | <i>L. major</i> | 40  | 169  | 208  |
| LmjF19.1345 | <i>L. major</i> | 53  | 1    | 53   |
| LmjF19.1345 | <i>L. major</i> | 42  | 172  | 213  |
| LmjF19.1345 | <i>L. major</i> | 42  | 172  | 213  |
| LmjF19.1347 | <i>L. major</i> | 47  | 146  | 192  |
| LmjF19.1347 | <i>L. major</i> | 60  | 444  | 503  |
| LmjF19.1347 | <i>L. major</i> | 60  | 444  | 503  |

|             |                 |     |     |     |
|-------------|-----------------|-----|-----|-----|
| LmjF19.1350 | <i>L. major</i> | 53  | 320 | 372 |
| LmjF19.1365 | <i>L. major</i> | 53  | 24  | 76  |
| LmjF19.1370 | <i>L. major</i> | 124 | 111 | 234 |
| LmjF19.1370 | <i>L. major</i> | 133 | 250 | 382 |
| LmjF19.1370 | <i>L. major</i> | 71  | 622 | 692 |
| LmjF19.1380 | <i>L. major</i> | 42  | 1   | 42  |
| LmjF19.1380 | <i>L. major</i> | 46  | 172 | 217 |
| LmjF19.1380 | <i>L. major</i> | 60  | 460 | 519 |
| LmjF19.1380 | <i>L. major</i> | 61  | 553 | 613 |
| LmjF19.1410 | <i>L. major</i> | 68  | 164 | 231 |
| LmjF19.1410 | <i>L. major</i> | 73  | 705 | 777 |
| LmjF19.1410 | <i>L. major</i> | 73  | 705 | 777 |
| LmjF19.1430 | <i>L. major</i> | 44  | 150 | 193 |
| LmjF19.1430 | <i>L. major</i> | 78  | 210 | 287 |
| LmjF19.1450 | <i>L. major</i> | 59  | 205 | 263 |
| LmjF19.1470 | <i>L. major</i> | 41  | 1   | 41  |
| LmjF19.1470 | <i>L. major</i> | 47  | 344 | 390 |
| LmjF19.1470 | <i>L. major</i> | 44  | 509 | 552 |
| LmjF19.1480 | <i>L. major</i> | 54  | 190 | 243 |
| LmjF19.1500 | <i>L. major</i> | 54  | 190 | 243 |
| LmjF19.1520 | <i>L. major</i> | 153 | 1   | 153 |
| LmjF19.1520 | <i>L. major</i> | 88  | 180 | 267 |
| LmjF19.1520 | <i>L. major</i> | 44  | 385 | 428 |
| LmjF19.1520 | <i>L. major</i> | 44  | 578 | 621 |
| LmjF19.1520 | <i>L. major</i> | 87  | 679 | 765 |
| LmjF19.1550 | <i>L. major</i> | 40  | 89  | 128 |
| LmjF19.1580 | <i>L. major</i> | 114 | 197 | 310 |
| LmjF19.1590 | <i>L. major</i> | 41  | 73  | 113 |
| LmjF19.1590 | <i>L. major</i> | 51  | 477 | 527 |
| LmjF19.1590 | <i>L. major</i> | 49  | 550 | 598 |
| LmjF19.1600 | <i>L. major</i> | 49  | 1   | 49  |
| LmjF19.1620 | <i>L. major</i> | 49  | 260 | 308 |
| LmjF19.1640 | <i>L. major</i> | 69  | 1   | 69  |
| LmjF19.1640 | <i>L. major</i> | 42  | 508 | 549 |
| LmjF19.1640 | <i>L. major</i> | 42  | 508 | 549 |
| LmjF19.1650 | <i>L. major</i> | 112 | 45  | 156 |
| LmjF20.0010 | <i>L. major</i> | 42  | 867 | 908 |
| LmjF20.0020 | <i>L. major</i> | 58  | 353 | 410 |
| LmjF20.0030 | <i>L. major</i> | 53  | 1   | 53  |
| LmjF20.0060 | <i>L. major</i> | 284 | 12  | 295 |
| LmjF20.0060 | <i>L. major</i> | 56  | 570 | 625 |
| LmjF20.0060 | <i>L. major</i> | 52  | 855 | 906 |
| LmjF20.0070 | <i>L. major</i> | 40  | 1   | 40  |
| LmjF20.0080 | <i>L. major</i> | 99  | 352 | 450 |
| LmjF20.0130 | <i>L. major</i> | 172 | 273 | 444 |
| LmjF20.0140 | <i>L. major</i> | 158 | 183 | 340 |
| LmjF20.0140 | <i>L. major</i> | 225 | 403 | 627 |

|             |                 |     |      |      |
|-------------|-----------------|-----|------|------|
| LmjF20.0140 | <i>L. major</i> | 96  | 1124 | 1219 |
| LmjF20.0150 | <i>L. major</i> | 42  | 710  | 751  |
| LmjF20.0150 | <i>L. major</i> | 41  | 868  | 908  |
| LmjF20.0150 | <i>L. major</i> | 41  | 868  | 908  |
| LmjF20.0160 | <i>L. major</i> | 170 | 524  | 693  |
| LmjF20.0180 | <i>L. major</i> | 80  | 51   | 130  |
| LmjF20.0180 | <i>L. major</i> | 53  | 171  | 223  |
| LmjF20.0180 | <i>L. major</i> | 132 | 226  | 357  |
| LmjF20.0180 | <i>L. major</i> | 86  | 390  | 475  |
| LmjF20.0180 | <i>L. major</i> | 53  | 524  | 576  |
| LmjF20.0180 | <i>L. major</i> | 40  | 706  | 745  |
| LmjF20.0190 | <i>L. major</i> | 106 | 97   | 202  |
| LmjF20.0200 | <i>L. major</i> | 70  | 1    | 70   |
| LmjF20.0200 | <i>L. major</i> | 66  | 249  | 314  |
| LmjF20.0200 | <i>L. major</i> | 43  | 356  | 398  |
| LmjF20.0220 | <i>L. major</i> | 44  | 373  | 416  |
| LmjF20.0230 | <i>L. major</i> | 67  | 1    | 67   |
| LmjF20.0250 | <i>L. major</i> | 79  | 1    | 79   |
| LmjF20.0260 | <i>L. major</i> | 41  | 1119 | 1159 |
| LmjF20.0260 | <i>L. major</i> | 41  | 1881 | 1921 |
| LmjF20.0260 | <i>L. major</i> | 83  | 2024 | 2106 |
| LmjF20.0260 | <i>L. major</i> | 51  | 2916 | 2966 |
| LmjF20.0260 | <i>L. major</i> | 52  | 3006 | 3057 |
| LmjF20.0260 | <i>L. major</i> | 64  | 3379 | 3442 |
| LmjF20.0260 | <i>L. major</i> | 90  | 3753 | 3842 |
| LmjF20.0260 | <i>L. major</i> | 556 | 3949 | 4504 |
| LmjF20.0260 | <i>L. major</i> | 53  | 4716 | 4768 |
| LmjF20.0265 | <i>L. major</i> | 59  | 95   | 153  |
| LmjF20.0265 | <i>L. major</i> | 40  | 223  | 262  |
| LmjF20.0265 | <i>L. major</i> | 40  | 223  | 262  |
| LmjF20.0270 | <i>L. major</i> | 67  | 1    | 67   |
| LmjF20.0270 | <i>L. major</i> | 97  | 107  | 203  |
| LmjF20.0270 | <i>L. major</i> | 85  | 213  | 297  |
| LmjF20.0280 | <i>L. major</i> | 52  | 1    | 52   |
| LmjF20.0290 | <i>L. major</i> | 53  | 154  | 206  |
| LmjF20.0290 | <i>L. major</i> | 41  | 408  | 448  |
| LmjF20.0290 | <i>L. major</i> | 56  | 718  | 773  |
| LmjF20.0320 | <i>L. major</i> | 96  | 211  | 306  |
| LmjF20.0320 | <i>L. major</i> | 119 | 446  | 564  |
| LmjF20.0320 | <i>L. major</i> | 55  | 576  | 630  |
| LmjF20.0330 | <i>L. major</i> | 164 | 31   | 194  |
| LmjF20.0340 | <i>L. major</i> | 96  | 164  | 259  |
| LmjF20.0340 | <i>L. major</i> | 84  | 306  | 389  |
| LmjF20.0343 | <i>L. major</i> | 77  | 31   | 107  |
| LmjF20.0346 | <i>L. major</i> | 51  | 67   | 117  |
| LmjF20.0350 | <i>L. major</i> | 129 | 218  | 346  |
| LmjF20.0350 | <i>L. major</i> | 129 | 602  | 730  |

|             |                 |     |      |      |
|-------------|-----------------|-----|------|------|
| LmjF20.0355 | <i>L. major</i> | 153 | 72   | 224  |
| LmjF20.0355 | <i>L. major</i> | 41  | 264  | 304  |
| LmjF20.0370 | <i>L. major</i> | 83  | 266  | 348  |
| LmjF20.0370 | <i>L. major</i> | 50  | 428  | 477  |
| LmjF20.0370 | <i>L. major</i> | 68  | 1146 | 1213 |
| LmjF20.0375 | <i>L. major</i> | 66  | 464  | 529  |
| LmjF20.0375 | <i>L. major</i> | 150 | 584  | 733  |
| LmjF20.0375 | <i>L. major</i> | 58  | 1342 | 1399 |
| LmjF20.0380 | <i>L. major</i> | 44  | 221  | 264  |
| LmjF20.0390 | <i>L. major</i> | 91  | 221  | 311  |
| LmjF20.0400 | <i>L. major</i> | 55  | 167  | 221  |
| LmjF20.0400 | <i>L. major</i> | 49  | 298  | 346  |
| LmjF20.0400 | <i>L. major</i> | 42  | 415  | 456  |
| LmjF20.0400 | <i>L. major</i> | 56  | 496  | 551  |
| LmjF20.0410 | <i>L. major</i> | 719 | 26   | 744  |
| LmjF20.0410 | <i>L. major</i> | 601 | 746  | 1346 |
| LmjF20.0420 | <i>L. major</i> | 139 | 1    | 139  |
| LmjF20.0430 | <i>L. major</i> | 44  | 26   | 69   |
| LmjF20.0430 | <i>L. major</i> | 95  | 329  | 423  |
| LmjF20.0430 | <i>L. major</i> | 41  | 684  | 724  |
| LmjF20.0440 | <i>L. major</i> | 49  | 169  | 217  |
| LmjF20.0470 | <i>L. major</i> | 42  | 116  | 157  |
| LmjF20.0470 | <i>L. major</i> | 112 | 390  | 501  |
| LmjF20.0480 | <i>L. major</i> | 67  | 124  | 190  |
| LmjF20.0480 | <i>L. major</i> | 40  | 270  | 309  |
| LmjF20.0490 | <i>L. major</i> | 89  | 1    | 89   |
| LmjF20.0500 | <i>L. major</i> | 69  | 209  | 277  |
| LmjF20.0510 | <i>L. major</i> | 65  | 1    | 65   |
| LmjF20.0510 | <i>L. major</i> | 61  | 329  | 389  |
| LmjF20.0510 | <i>L. major</i> | 61  | 329  | 389  |
| LmjF20.0520 | <i>L. major</i> | 226 | 121  | 346  |
| LmjF20.0520 | <i>L. major</i> | 222 | 366  | 587  |
| LmjF20.0520 | <i>L. major</i> | 54  | 703  | 756  |
| LmjF20.0540 | <i>L. major</i> | 44  | 1    | 44   |
| LmjF20.0540 | <i>L. major</i> | 121 | 112  | 232  |
| LmjF20.0540 | <i>L. major</i> | 121 | 112  | 232  |
| LmjF20.0550 | <i>L. major</i> | 41  | 72   | 112  |
| LmjF20.0550 | <i>L. major</i> | 67  | 167  | 233  |
| LmjF20.0550 | <i>L. major</i> | 43  | 486  | 528  |
| LmjF20.0570 | <i>L. major</i> | 91  | 118  | 208  |
| LmjF20.0570 | <i>L. major</i> | 42  | 308  | 349  |
| LmjF20.0570 | <i>L. major</i> | 77  | 470  | 546  |
| LmjF20.0580 | <i>L. major</i> | 146 | 1    | 146  |
| LmjF20.0580 | <i>L. major</i> | 119 | 313  | 431  |
| LmjF20.0590 | <i>L. major</i> | 67  | 64   | 130  |
| LmjF20.0590 | <i>L. major</i> | 212 | 178  | 389  |
| LmjF20.0590 | <i>L. major</i> | 70  | 509  | 578  |

|             |                 |     |      |      |
|-------------|-----------------|-----|------|------|
| LmjF20.0620 | <i>L. major</i> | 86  | 74   | 159  |
| LmjF20.0620 | <i>L. major</i> | 58  | 228  | 285  |
| LmjF20.0620 | <i>L. major</i> | 186 | 321  | 506  |
| LmjF20.0620 | <i>L. major</i> | 435 | 542  | 976  |
| LmjF20.0620 | <i>L. major</i> | 183 | 1036 | 1218 |
| LmjF20.0620 | <i>L. major</i> | 84  | 1390 | 1473 |
| LmjF20.0630 | <i>L. major</i> | 298 | 11   | 308  |
| LmjF20.0630 | <i>L. major</i> | 152 | 310  | 461  |
| LmjF20.0630 | <i>L. major</i> | 180 | 503  | 682  |
| LmjF20.0630 | <i>L. major</i> | 397 | 692  | 1088 |
| LmjF20.0630 | <i>L. major</i> | 121 | 1090 | 1210 |
| LmjF20.0640 | <i>L. major</i> | 154 | 1    | 154  |
| LmjF20.0640 | <i>L. major</i> | 58  | 185  | 242  |
| LmjF20.0640 | <i>L. major</i> | 82  | 519  | 600  |
| LmjF20.0640 | <i>L. major</i> | 252 | 740  | 991  |
| LmjF20.0640 | <i>L. major</i> | 45  | 1017 | 1061 |
| LmjF20.0650 | <i>L. major</i> | 70  | 142  | 211  |
| LmjF20.0650 | <i>L. major</i> | 96  | 360  | 455  |
| LmjF20.0650 | <i>L. major</i> | 96  | 360  | 455  |
| LmjF20.0660 | <i>L. major</i> | 45  | 110  | 154  |
| LmjF20.0660 | <i>L. major</i> | 42  | 558  | 599  |
| LmjF20.0660 | <i>L. major</i> | 42  | 558  | 599  |
| LmjF20.0670 | <i>L. major</i> | 42  | 143  | 184  |
| LmjF20.0690 | <i>L. major</i> | 58  | 71   | 128  |
| LmjF20.0690 | <i>L. major</i> | 139 | 162  | 300  |
| LmjF20.0690 | <i>L. major</i> | 178 | 439  | 616  |
| LmjF20.0690 | <i>L. major</i> | 169 | 668  | 836  |
| LmjF20.0690 | <i>L. major</i> | 422 | 848  | 1269 |
| LmjF20.0700 | <i>L. major</i> | 185 | 115  | 299  |
| LmjF20.0700 | <i>L. major</i> | 440 | 621  | 1060 |
| LmjF20.0705 | <i>L. major</i> | 170 | 42   | 211  |
| LmjF20.0705 | <i>L. major</i> | 155 | 442  | 596  |
| LmjF20.0705 | <i>L. major</i> | 56  | 660  | 715  |
| LmjF20.0705 | <i>L. major</i> | 411 | 846  | 1256 |
| LmjF20.0705 | <i>L. major</i> | 45  | 1279 | 1323 |
| LmjF20.0705 | <i>L. major</i> | 316 | 1329 | 1644 |
| LmjF20.0770 | <i>L. major</i> | 242 | 1    | 242  |
| LmjF20.0770 | <i>L. major</i> | 403 | 292  | 694  |
| LmjF20.0770 | <i>L. major</i> | 124 | 703  | 826  |
| LmjF20.0770 | <i>L. major</i> | 136 | 850  | 985  |
| LmjF20.0770 | <i>L. major</i> | 103 | 1023 | 1125 |
| LmjF20.0770 | <i>L. major</i> | 615 | 1136 | 1750 |
| LmjF20.0770 | <i>L. major</i> | 203 | 1772 | 1974 |
| LmjF20.0770 | <i>L. major</i> | 277 | 2155 | 2431 |
| LmjF20.0770 | <i>L. major</i> | 176 | 2524 | 2699 |
| LmjF20.0770 | <i>L. major</i> | 99  | 2704 | 2802 |
| LmjF20.0770 | <i>L. major</i> | 278 | 3096 | 3373 |

|             |                 |     |      |      |
|-------------|-----------------|-----|------|------|
| LmjF20.0770 | <i>L. major</i> | 115 | 3885 | 3999 |
| LmjF20.0780 | <i>L. major</i> | 117 | 85   | 201  |
| LmjF20.0780 | <i>L. major</i> | 56  | 452  | 507  |
| LmjF20.0790 | <i>L. major</i> | 46  | 74   | 119  |
| LmjF20.0790 | <i>L. major</i> | 42  | 303  | 344  |
| LmjF20.0790 | <i>L. major</i> | 68  | 519  | 586  |
| LmjF20.0790 | <i>L. major</i> | 58  | 668  | 725  |
| LmjF20.0800 | <i>L. major</i> | 153 | 1    | 153  |
| LmjF20.0800 | <i>L. major</i> | 112 | 183  | 294  |
| LmjF20.0800 | <i>L. major</i> | 56  | 303  | 358  |
| LmjF20.0810 | <i>L. major</i> | 53  | 686  | 738  |
| LmjF20.0820 | <i>L. major</i> | 88  | 1    | 88   |
| LmjF20.0830 | <i>L. major</i> | 53  | 8    | 60   |
| LmjF20.0850 | <i>L. major</i> | 50  | 163  | 212  |
| LmjF20.0850 | <i>L. major</i> | 90  | 605  | 694  |
| LmjF20.0850 | <i>L. major</i> | 59  | 754  | 812  |
| LmjF20.0850 | <i>L. major</i> | 66  | 969  | 1034 |
| LmjF20.0850 | <i>L. major</i> | 52  | 1167 | 1218 |
| LmjF20.0850 | <i>L. major</i> | 133 | 1327 | 1459 |
| LmjF20.0850 | <i>L. major</i> | 51  | 1492 | 1542 |
| LmjF20.0860 | <i>L. major</i> | 56  | 179  | 234  |
| LmjF20.0870 | <i>L. major</i> | 73  | 129  | 201  |
| LmjF20.0870 | <i>L. major</i> | 55  | 262  | 316  |
| LmjF20.0870 | <i>L. major</i> | 56  | 431  | 486  |
| LmjF20.0870 | <i>L. major</i> | 168 | 601  | 768  |
| LmjF20.0880 | <i>L. major</i> | 58  | 103  | 160  |
| LmjF20.0890 | <i>L. major</i> | 52  | 1    | 52   |
| LmjF20.0890 | <i>L. major</i> | 160 | 133  | 292  |
| LmjF20.0900 | <i>L. major</i> | 132 | 1    | 132  |
| LmjF20.0900 | <i>L. major</i> | 60  | 421  | 480  |
| LmjF20.0900 | <i>L. major</i> | 95  | 485  | 579  |
| LmjF20.0900 | <i>L. major</i> | 72  | 709  | 780  |
| LmjF20.0900 | <i>L. major</i> | 82  | 809  | 890  |
| LmjF20.0910 | <i>L. major</i> | 189 | 95   | 283  |
| LmjF20.0920 | <i>L. major</i> | 250 | 35   | 284  |
| LmjF20.0920 | <i>L. major</i> | 60  | 348  | 407  |
| LmjF20.0920 | <i>L. major</i> | 43  | 529  | 571  |
| LmjF20.0930 | <i>L. major</i> | 47  | 204  | 250  |
| LmjF20.0930 | <i>L. major</i> | 43  | 490  | 532  |
| LmjF20.0930 | <i>L. major</i> | 51  | 666  | 716  |
| LmjF20.0930 | <i>L. major</i> | 44  | 1524 | 1567 |
| LmjF20.0930 | <i>L. major</i> | 56  | 1691 | 1746 |
| LmjF20.0930 | <i>L. major</i> | 53  | 1766 | 1818 |
| LmjF20.0930 | <i>L. major</i> | 125 | 1968 | 2092 |
| LmjF20.0940 | <i>L. major</i> | 142 | 242  | 383  |
| LmjF20.0940 | <i>L. major</i> | 71  | 392  | 462  |
| LmjF20.0950 | <i>L. major</i> | 41  | 107  | 147  |

|             |                 |     |      |      |
|-------------|-----------------|-----|------|------|
| LmjF20.0950 | <i>L. major</i> | 51  | 297  | 347  |
| LmjF20.0950 | <i>L. major</i> | 47  | 362  | 408  |
| LmjF20.0950 | <i>L. major</i> | 256 | 448  | 703  |
| LmjF20.0960 | <i>L. major</i> | 136 | 1    | 136  |
| LmjF20.0960 | <i>L. major</i> | 131 | 142  | 272  |
| LmjF20.0960 | <i>L. major</i> | 173 | 292  | 464  |
| LmjF20.0960 | <i>L. major</i> | 77  | 509  | 585  |
| LmjF20.0960 | <i>L. major</i> | 288 | 617  | 904  |
| LmjF20.0960 | <i>L. major</i> | 331 | 918  | 1248 |
| LmjF20.0960 | <i>L. major</i> | 93  | 1337 | 1429 |
| LmjF20.0960 | <i>L. major</i> | 404 | 1441 | 1844 |
| LmjF20.0960 | <i>L. major</i> | 630 | 1925 | 2554 |
| LmjF20.0960 | <i>L. major</i> | 100 | 2589 | 2688 |
| LmjF20.0960 | <i>L. major</i> | 43  | 2954 | 2996 |
| LmjF20.0960 | <i>L. major</i> | 75  | 3172 | 3246 |
| LmjF20.0960 | <i>L. major</i> | 44  | 3397 | 3440 |
| LmjF20.0980 | <i>L. major</i> | 58  | 6    | 63   |
| LmjF20.0980 | <i>L. major</i> | 41  | 73   | 113  |
| LmjF20.0980 | <i>L. major</i> | 55  | 462  | 516  |
| LmjF20.0980 | <i>L. major</i> | 160 | 533  | 692  |
| LmjF20.0990 | <i>L. major</i> | 79  | 47   | 125  |
| LmjF20.0990 | <i>L. major</i> | 63  | 375  | 437  |
| LmjF20.0990 | <i>L. major</i> | 53  | 452  | 504  |
| LmjF20.1000 | <i>L. major</i> | 611 | 112  | 722  |
| LmjF20.1020 | <i>L. major</i> | 455 | 31   | 485  |
| LmjF20.1020 | <i>L. major</i> | 492 | 529  | 1020 |
| LmjF20.1030 | <i>L. major</i> | 151 | 1    | 151  |
| LmjF20.1030 | <i>L. major</i> | 55  | 163  | 217  |
| LmjF20.1040 | <i>L. major</i> | 432 | 30   | 461  |
| LmjF20.1040 | <i>L. major</i> | 219 | 463  | 681  |
| LmjF20.1040 | <i>L. major</i> | 45  | 703  | 747  |
| LmjF20.1040 | <i>L. major</i> | 141 | 752  | 892  |
| LmjF20.1050 | <i>L. major</i> | 597 | 1    | 597  |
| LmjF20.1050 | <i>L. major</i> | 151 | 614  | 764  |
| LmjF20.1050 | <i>L. major</i> | 158 | 780  | 937  |
| LmjF20.1060 | <i>L. major</i> | 189 | 1    | 189  |
| LmjF20.1060 | <i>L. major</i> | 293 | 207  | 499  |
| LmjF20.1060 | <i>L. major</i> | 752 | 516  | 1267 |
| LmjF20.1070 | <i>L. major</i> | 291 | 1    | 291  |
| LmjF20.1080 | <i>L. major</i> | 53  | 75   | 127  |
| LmjF20.1080 | <i>L. major</i> | 64  | 215  | 278  |
| LmjF20.1080 | <i>L. major</i> | 49  | 454  | 502  |
| LmjF20.1080 | <i>L. major</i> | 49  | 652  | 700  |
| LmjF20.1080 | <i>L. major</i> | 87  | 780  | 866  |
| LmjF20.1080 | <i>L. major</i> | 152 | 874  | 1025 |
| LmjF20.1080 | <i>L. major</i> | 156 | 1043 | 1198 |
| LmjF20.1080 | <i>L. major</i> | 132 | 1204 | 1335 |

|             |                 |      |      |      |
|-------------|-----------------|------|------|------|
| LmjF20.1080 | <i>L. major</i> | 225  | 1397 | 1621 |
| LmjF20.1080 | <i>L. major</i> | 126  | 1705 | 1830 |
| LmjF20.1080 | <i>L. major</i> | 138  | 1848 | 1985 |
| LmjF20.1080 | <i>L. major</i> | 274  | 2106 | 2379 |
| LmjF20.1090 | <i>L. major</i> | 80   | 60   | 139  |
| LmjF20.1090 | <i>L. major</i> | 224  | 150  | 373  |
| LmjF20.1090 | <i>L. major</i> | 60   | 403  | 462  |
| LmjF20.1090 | <i>L. major</i> | 223  | 496  | 718  |
| LmjF20.1090 | <i>L. major</i> | 194  | 802  | 995  |
| LmjF20.1090 | <i>L. major</i> | 131  | 1041 | 1171 |
| LmjF20.1090 | <i>L. major</i> | 114  | 1272 | 1385 |
| LmjF20.1090 | <i>L. major</i> | 57   | 1543 | 1599 |
| LmjF20.1090 | <i>L. major</i> | 137  | 1661 | 1797 |
| LmjF20.1090 | <i>L. major</i> | 53   | 1856 | 1908 |
| LmjF20.1100 | <i>L. major</i> | 105  | 30   | 134  |
| LmjF20.1100 | <i>L. major</i> | 42   | 155  | 196  |
| LmjF20.1100 | <i>L. major</i> | 71   | 240  | 310  |
| LmjF20.1100 | <i>L. major</i> | 65   | 344  | 408  |
| LmjF20.1100 | <i>L. major</i> | 49   | 487  | 535  |
| LmjF20.1100 | <i>L. major</i> | 81   | 761  | 841  |
| LmjF20.1100 | <i>L. major</i> | 47   | 956  | 1002 |
| LmjF20.1100 | <i>L. major</i> | 91   | 1010 | 1100 |
| LmjF20.1100 | <i>L. major</i> | 64   | 1238 | 1301 |
| LmjF20.1100 | <i>L. major</i> | 50   | 1450 | 1499 |
| LmjF20.1100 | <i>L. major</i> | 120  | 1513 | 1632 |
| LmjF20.1100 | <i>L. major</i> | 209  | 1686 | 1894 |
| LmjF20.1100 | <i>L. major</i> | 41   | 1908 | 1948 |
| LmjF20.1110 | <i>L. major</i> | 99   | 1    | 99   |
| LmjF20.1110 | <i>L. major</i> | 1035 | 110  | 1144 |
| LmjF20.1120 | <i>L. major</i> | 167  | 1    | 167  |
| LmjF20.1120 | <i>L. major</i> | 119  | 609  | 727  |
| LmjF20.1120 | <i>L. major</i> | 208  | 788  | 995  |
| LmjF20.1120 | <i>L. major</i> | 132  | 1587 | 1718 |
| LmjF20.1120 | <i>L. major</i> | 197  | 1849 | 2045 |
| LmjF20.1120 | <i>L. major</i> | 47   | 2064 | 2110 |
| LmjF20.1130 | <i>L. major</i> | 62   | 67   | 128  |
| LmjF20.1130 | <i>L. major</i> | 106  | 283  | 388  |
| LmjF20.1130 | <i>L. major</i> | 40   | 484  | 523  |
| LmjF20.1130 | <i>L. major</i> | 86   | 568  | 653  |
| LmjF20.1140 | <i>L. major</i> | 53   | 99   | 151  |
| LmjF20.1150 | <i>L. major</i> | 70   | 130  | 199  |
| LmjF20.1150 | <i>L. major</i> | 59   | 211  | 269  |
| LmjF20.1150 | <i>L. major</i> | 59   | 211  | 269  |
| LmjF20.1180 | <i>L. major</i> | 289  | 1    | 289  |
| LmjF20.1185 | <i>L. major</i> | 133  | 1    | 133  |
| LmjF20.1200 | <i>L. major</i> | 74   | 546  | 619  |
| LmjF20.1240 | <i>L. major</i> | 221  | 1    | 221  |



|             |                 |     |      |      |
|-------------|-----------------|-----|------|------|
| LmjF20.1240 | <i>L. major</i> | 48  | 285  | 332  |
| LmjF20.1240 | <i>L. major</i> | 49  | 464  | 512  |
| LmjF20.1240 | <i>L. major</i> | 65  | 543  | 607  |
| LmjF20.1240 | <i>L. major</i> | 209 | 851  | 1059 |
| LmjF20.1240 | <i>L. major</i> | 42  | 1113 | 1154 |
| LmjF20.1240 | <i>L. major</i> | 69  | 1319 | 1387 |
| LmjF20.1240 | <i>L. major</i> | 60  | 1418 | 1477 |
| LmjF20.1240 | <i>L. major</i> | 96  | 1593 | 1688 |
| LmjF20.1240 | <i>L. major</i> | 76  | 1759 | 1834 |
| LmjF20.1240 | <i>L. major</i> | 120 | 1918 | 2037 |
| LmjF20.1240 | <i>L. major</i> | 44  | 2162 | 2205 |
| LmjF20.1240 | <i>L. major</i> | 45  | 2243 | 2287 |
| LmjF20.1240 | <i>L. major</i> | 52  | 2346 | 2397 |
| LmjF20.1240 | <i>L. major</i> | 64  | 2656 | 2719 |
| LmjF20.1250 | <i>L. major</i> | 122 | 1    | 122  |
| LmjF20.1260 | <i>L. major</i> | 101 | 1    | 101  |
| LmjF20.1260 | <i>L. major</i> | 223 | 153  | 375  |
| LmjF20.1260 | <i>L. major</i> | 72  | 406  | 477  |
| LmjF20.1260 | <i>L. major</i> | 253 | 592  | 844  |
| LmjF20.1270 | <i>L. major</i> | 50  | 62   | 111  |
| LmjF20.1290 | <i>L. major</i> | 117 | 121  | 237  |
| LmjF20.1320 | <i>L. major</i> | 123 | 1    | 123  |
| LmjF20.1340 | <i>L. major</i> | 94  | 284  | 377  |
| LmjF20.1350 | <i>L. major</i> | 40  | 1    | 40   |
| LmjF20.1350 | <i>L. major</i> | 71  | 496  | 566  |
| LmjF20.1350 | <i>L. major</i> | 71  | 496  | 566  |
| LmjF20.1360 | <i>L. major</i> | 71  | 38   | 108  |
| LmjF20.1360 | <i>L. major</i> | 47  | 157  | 203  |
| LmjF20.1360 | <i>L. major</i> | 47  | 157  | 203  |
| LmjF20.1365 | <i>L. major</i> | 73  | 308  | 380  |
| LmjF20.1365 | <i>L. major</i> | 40  | 434  | 473  |
| LmjF20.1365 | <i>L. major</i> | 40  | 434  | 473  |
| LmjF20.1370 | <i>L. major</i> | 84  | 308  | 391  |
| LmjF20.1380 | <i>L. major</i> | 103 | 1    | 103  |
| LmjF20.1380 | <i>L. major</i> | 77  | 286  | 362  |
| LmjF20.1380 | <i>L. major</i> | 211 | 632  | 842  |
| LmjF20.1380 | <i>L. major</i> | 385 | 870  | 1254 |
| LmjF20.1390 | <i>L. major</i> | 373 | 1    | 373  |
| LmjF20.1410 | <i>L. major</i> | 41  | 1    | 41   |
| LmjF20.1410 | <i>L. major</i> | 152 | 61   | 212  |
| LmjF20.1410 | <i>L. major</i> | 85  | 442  | 526  |
| LmjF20.1410 | <i>L. major</i> | 53  | 692  | 744  |
| LmjF20.1410 | <i>L. major</i> | 48  | 751  | 798  |
| LmjF20.1420 | <i>L. major</i> | 110 | 105  | 214  |
| LmjF20.1420 | <i>L. major</i> | 77  | 250  | 326  |
| LmjF20.1420 | <i>L. major</i> | 99  | 448  | 546  |
| LmjF20.1420 | <i>L. major</i> | 569 | 578  | 1146 |

|             |                 |     |      |      |
|-------------|-----------------|-----|------|------|
| LmjF20.1440 | <i>L. major</i> | 145 | 1    | 145  |
| LmjF20.1450 | <i>L. major</i> | 174 | 194  | 367  |
| LmjF20.1460 | <i>L. major</i> | 88  | 260  | 347  |
| LmjF20.1470 | <i>L. major</i> | 85  | 1    | 85   |
| LmjF20.1470 | <i>L. major</i> | 57  | 164  | 220  |
| LmjF20.1470 | <i>L. major</i> | 41  | 374  | 414  |
| LmjF20.1480 | <i>L. major</i> | 66  | 93   | 158  |
| LmjF20.1480 | <i>L. major</i> | 141 | 390  | 530  |
| LmjF20.1490 | <i>L. major</i> | 48  | 768  | 815  |
| LmjF20.1490 | <i>L. major</i> | 71  | 859  | 929  |
| LmjF20.1490 | <i>L. major</i> | 71  | 859  | 929  |
| LmjF20.1500 | <i>L. major</i> | 91  | 334  | 424  |
| LmjF20.1500 | <i>L. major</i> | 57  | 482  | 538  |
| LmjF20.1500 | <i>L. major</i> | 80  | 700  | 779  |
| LmjF20.1500 | <i>L. major</i> | 154 | 800  | 953  |
| LmjF20.1510 | <i>L. major</i> | 47  | 1    | 47   |
| LmjF20.1510 | <i>L. major</i> | 58  | 347  | 404  |
| LmjF20.1510 | <i>L. major</i> | 40  | 790  | 829  |
| LmjF20.1510 | <i>L. major</i> | 64  | 1347 | 1410 |
| LmjF20.1510 | <i>L. major</i> | 45  | 1729 | 1773 |
| LmjF20.1520 | <i>L. major</i> | 47  | 1    | 47   |
| LmjF20.1520 | <i>L. major</i> | 69  | 314  | 382  |
| LmjF20.1520 | <i>L. major</i> | 53  | 559  | 611  |
| LmjF20.1520 | <i>L. major</i> | 55  | 864  | 918  |
| LmjF20.1520 | <i>L. major</i> | 53  | 972  | 1024 |
| LmjF20.1520 | <i>L. major</i> | 49  | 1084 | 1132 |
| LmjF20.1520 | <i>L. major</i> | 95  | 1339 | 1433 |
| LmjF20.1520 | <i>L. major</i> | 63  | 1463 | 1525 |
| LmjF20.1530 | <i>L. major</i> | 91  | 177  | 267  |
| LmjF20.1530 | <i>L. major</i> | 49  | 502  | 550  |
| LmjF20.1530 | <i>L. major</i> | 43  | 739  | 781  |
| LmjF20.1530 | <i>L. major</i> | 93  | 789  | 881  |
| LmjF20.1540 | <i>L. major</i> | 62  | 60   | 121  |
| LmjF20.1550 | <i>L. major</i> | 40  | 61   | 100  |
| LmjF20.1560 | <i>L. major</i> | 40  | 62   | 101  |
| LmjF20.1570 | <i>L. major</i> | 40  | 82   | 121  |
| LmjF20.1580 | <i>L. major</i> | 65  | 99   | 163  |
| LmjF20.1580 | <i>L. major</i> | 56  | 696  | 751  |
| LmjF20.1580 | <i>L. major</i> | 43  | 818  | 860  |
| LmjF20.1580 | <i>L. major</i> | 128 | 891  | 1018 |
| LmjF20.1600 | <i>L. major</i> | 41  | 687  | 727  |
| LmjF20.1610 | <i>L. major</i> | 47  | 208  | 254  |
| LmjF20.1620 | <i>L. major</i> | 46  | 185  | 230  |
| LmjF20.1630 | <i>L. major</i> | 44  | 1    | 44   |
| LmjF20.1630 | <i>L. major</i> | 151 | 91   | 241  |
| LmjF20.1640 | <i>L. major</i> | 43  | 113  | 155  |
| LmjF20.1640 | <i>L. major</i> | 49  | 165  | 213  |

|             |                 |     |      |      |
|-------------|-----------------|-----|------|------|
| LmjF20.1640 | <i>L. major</i> | 49  | 165  | 213  |
| LmjF20.1660 | <i>L. major</i> | 153 | 251  | 403  |
| LmjF20.1670 | <i>L. major</i> | 103 | 1    | 103  |
| LmjF20.1670 | <i>L. major</i> | 53  | 265  | 317  |
| LmjF20.1680 | <i>L. major</i> | 120 | 686  | 805  |
| LmjF20.1700 | <i>L. major</i> | 182 | 1    | 182  |
| LmjF20.1700 | <i>L. major</i> | 74  | 206  | 279  |
| LmjF20.1710 | <i>L. major</i> | 41  | 103  | 143  |
| LmjF20.1710 | <i>L. major</i> | 49  | 554  | 602  |
| LmjF20.1720 | <i>L. major</i> | 50  | 119  | 168  |
| LmjF20.1740 | <i>L. major</i> | 47  | 72   | 118  |
| LmjF20.1750 | <i>L. major</i> | 62  | 60   | 121  |
| LmjF21.0010 | <i>L. major</i> | 93  | 1    | 93   |
| LmjF21.0010 | <i>L. major</i> | 45  | 143  | 187  |
| LmjF21.0030 | <i>L. major</i> | 96  | 104  | 199  |
| LmjF21.0040 | <i>L. major</i> | 64  | 1    | 64   |
| LmjF21.0040 | <i>L. major</i> | 60  | 125  | 184  |
| LmjF21.0040 | <i>L. major</i> | 60  | 125  | 184  |
| LmjF21.0050 | <i>L. major</i> | 62  | 90   | 151  |
| LmjF21.0060 | <i>L. major</i> | 53  | 1    | 53   |
| LmjF21.0070 | <i>L. major</i> | 45  | 182  | 226  |
| LmjF21.0080 | <i>L. major</i> | 49  | 39   | 87   |
| LmjF21.0100 | <i>L. major</i> | 57  | 95   | 151  |
| LmjF21.0120 | <i>L. major</i> | 73  | 544  | 616  |
| LmjF21.0120 | <i>L. major</i> | 57  | 662  | 718  |
| LmjF21.0120 | <i>L. major</i> | 41  | 1036 | 1076 |
| LmjF21.0125 | <i>L. major</i> | 47  | 380  | 426  |
| LmjF21.0125 | <i>L. major</i> | 61  | 520  | 580  |
| LmjF21.0125 | <i>L. major</i> | 41  | 693  | 733  |
| LmjF21.0125 | <i>L. major</i> | 71  | 742  | 812  |
| LmjF21.0130 | <i>L. major</i> | 65  | 1    | 65   |
| LmjF21.0130 | <i>L. major</i> | 103 | 82   | 184  |
| LmjF21.0130 | <i>L. major</i> | 100 | 199  | 298  |
| LmjF21.0130 | <i>L. major</i> | 169 | 1227 | 1395 |
| LmjF21.0140 | <i>L. major</i> | 71  | 24   | 94   |
| LmjF21.0140 | <i>L. major</i> | 51  | 573  | 623  |
| LmjF21.0140 | <i>L. major</i> | 51  | 573  | 623  |
| LmjF21.0150 | <i>L. major</i> | 46  | 1    | 46   |
| LmjF21.0160 | <i>L. major</i> | 45  | 141  | 185  |
| LmjF21.0160 | <i>L. major</i> | 72  | 473  | 544  |
| LmjF21.0160 | <i>L. major</i> | 72  | 473  | 544  |
| LmjF21.0170 | <i>L. major</i> | 69  | 1    | 69   |
| LmjF21.0170 | <i>L. major</i> | 44  | 152  | 195  |
| LmjF21.0170 | <i>L. major</i> | 43  | 681  | 723  |
| LmjF21.0180 | <i>L. major</i> | 328 | 174  | 501  |
| LmjF21.0180 | <i>L. major</i> | 53  | 879  | 931  |
| LmjF21.0180 | <i>L. major</i> | 53  | 1388 | 1440 |

|             |                 |     |     |      |
|-------------|-----------------|-----|-----|------|
| LmjF21.0190 | <i>L. major</i> | 96  | 64  | 159  |
| LmjF21.0190 | <i>L. major</i> | 47  | 195 | 241  |
| LmjF21.0190 | <i>L. major</i> | 47  | 195 | 241  |
| LmjF21.0200 | <i>L. major</i> | 92  | 454 | 545  |
| LmjF21.0200 | <i>L. major</i> | 78  | 758 | 835  |
| LmjF21.0200 | <i>L. major</i> | 78  | 758 | 835  |
| LmjF21.0210 | <i>L. major</i> | 53  | 430 | 482  |
| LmjF21.0230 | <i>L. major</i> | 46  | 299 | 344  |
| LmjF21.0230 | <i>L. major</i> | 63  | 457 | 519  |
| LmjF21.0230 | <i>L. major</i> | 63  | 457 | 519  |
| LmjF21.0270 | <i>L. major</i> | 52  | 159 | 210  |
| LmjF21.0270 | <i>L. major</i> | 114 | 274 | 387  |
| LmjF21.0270 | <i>L. major</i> | 72  | 593 | 664  |
| LmjF21.0270 | <i>L. major</i> | 89  | 720 | 808  |
| LmjF21.0270 | <i>L. major</i> | 71  | 972 | 1042 |
| LmjF21.0280 | <i>L. major</i> | 175 | 100 | 274  |
| LmjF21.0280 | <i>L. major</i> | 45  | 409 | 453  |
| LmjF21.0290 | <i>L. major</i> | 70  | 41  | 110  |
| LmjF21.0290 | <i>L. major</i> | 66  | 149 | 214  |
| LmjF21.0290 | <i>L. major</i> | 65  | 261 | 325  |
| LmjF21.0290 | <i>L. major</i> | 54  | 370 | 423  |
| LmjF21.0290 | <i>L. major</i> | 59  | 555 | 613  |
| LmjF21.0290 | <i>L. major</i> | 61  | 778 | 838  |
| LmjF21.0290 | <i>L. major</i> | 86  | 973 | 1058 |
| LmjF21.0300 | <i>L. major</i> | 53  | 1   | 53   |
| LmjF21.0300 | <i>L. major</i> | 57  | 187 | 243  |
| LmjF21.0300 | <i>L. major</i> | 57  | 187 | 243  |
| LmjF21.0310 | <i>L. major</i> | 44  | 176 | 219  |
| LmjF21.0320 | <i>L. major</i> | 72  | 1   | 72   |
| LmjF21.0320 | <i>L. major</i> | 103 | 128 | 230  |
| LmjF21.0330 | <i>L. major</i> | 78  | 1   | 78   |
| LmjF21.0330 | <i>L. major</i> | 90  | 639 | 728  |
| LmjF21.0330 | <i>L. major</i> | 202 | 865 | 1066 |
| LmjF21.0360 | <i>L. major</i> | 160 | 111 | 270  |
| LmjF21.0370 | <i>L. major</i> | 61  | 1   | 61   |
| LmjF21.0370 | <i>L. major</i> | 155 | 137 | 291  |
| LmjF21.0370 | <i>L. major</i> | 73  | 341 | 413  |
| LmjF21.0370 | <i>L. major</i> | 49  | 433 | 481  |
| LmjF21.0390 | <i>L. major</i> | 41  | 252 | 292  |
| LmjF21.0400 | <i>L. major</i> | 190 | 1   | 190  |
| LmjF21.0400 | <i>L. major</i> | 55  | 338 | 392  |
| LmjF21.0400 | <i>L. major</i> | 64  | 523 | 586  |
| LmjF21.0410 | <i>L. major</i> | 98  | 49  | 146  |
| LmjF21.0410 | <i>L. major</i> | 49  | 201 | 249  |
| LmjF21.0410 | <i>L. major</i> | 42  | 399 | 440  |
| LmjF21.0410 | <i>L. major</i> | 53  | 534 | 586  |
| LmjF21.0410 | <i>L. major</i> | 62  | 657 | 718  |

|             |                 |     |      |      |
|-------------|-----------------|-----|------|------|
| LmjF21.0410 | <i>L. major</i> | 40  | 1086 | 1125 |
| LmjF21.0420 | <i>L. major</i> | 63  | 26   | 88   |
| LmjF21.0420 | <i>L. major</i> | 53  | 342  | 394  |
| LmjF21.0420 | <i>L. major</i> | 51  | 523  | 573  |
| LmjF21.0430 | <i>L. major</i> | 168 | 160  | 327  |
| LmjF21.0450 | <i>L. major</i> | 51  | 55   | 105  |
| LmjF21.0460 | <i>L. major</i> | 48  | 39   | 86   |
| LmjF21.0460 | <i>L. major</i> | 41  | 213  | 253  |
| LmjF21.0460 | <i>L. major</i> | 193 | 384  | 576  |
| LmjF21.0460 | <i>L. major</i> | 146 | 608  | 753  |
| LmjF21.0460 | <i>L. major</i> | 42  | 798  | 839  |
| LmjF21.0470 | <i>L. major</i> | 64  | 240  | 303  |
| LmjF21.0480 | <i>L. major</i> | 94  | 17   | 110  |
| LmjF21.0480 | <i>L. major</i> | 86  | 120  | 205  |
| LmjF21.0480 | <i>L. major</i> | 49  | 284  | 332  |
| LmjF21.0480 | <i>L. major</i> | 56  | 441  | 496  |
| LmjF21.0490 | <i>L. major</i> | 57  | 35   | 91   |
| LmjF21.0490 | <i>L. major</i> | 83  | 366  | 448  |
| LmjF21.0510 | <i>L. major</i> | 43  | 1    | 43   |
| LmjF21.0510 | <i>L. major</i> | 46  | 63   | 108  |
| LmjF21.0510 | <i>L. major</i> | 109 | 457  | 565  |
| LmjF21.0520 | <i>L. major</i> | 50  | 367  | 416  |
| LmjF21.0530 | <i>L. major</i> | 43  | 87   | 129  |
| LmjF21.0530 | <i>L. major</i> | 144 | 157  | 300  |
| LmjF21.0530 | <i>L. major</i> | 56  | 422  | 477  |
| LmjF21.0530 | <i>L. major</i> | 58  | 737  | 794  |
| LmjF21.0540 | <i>L. major</i> | 59  | 166  | 224  |
| LmjF21.0540 | <i>L. major</i> | 72  | 268  | 339  |
| LmjF21.0550 | <i>L. major</i> | 62  | 91   | 152  |
| LmjF21.0550 | <i>L. major</i> | 133 | 221  | 353  |
| LmjF21.0550 | <i>L. major</i> | 133 | 221  | 353  |
| LmjF21.0570 | <i>L. major</i> | 235 | 181  | 415  |
| LmjF21.0580 | <i>L. major</i> | 108 | 139  | 246  |
| LmjF21.0580 | <i>L. major</i> | 86  | 251  | 336  |
| LmjF21.0580 | <i>L. major</i> | 45  | 382  | 426  |
| LmjF21.0590 | <i>L. major</i> | 160 | 1    | 160  |
| LmjF21.0590 | <i>L. major</i> | 40  | 178  | 217  |
| LmjF21.0590 | <i>L. major</i> | 131 | 258  | 388  |
| LmjF21.0600 | <i>L. major</i> | 53  | 360  | 412  |
| LmjF21.0610 | <i>L. major</i> | 76  | 213  | 288  |
| LmjF21.0610 | <i>L. major</i> | 71  | 424  | 494  |
| LmjF21.0620 | <i>L. major</i> | 51  | 169  | 219  |
| LmjF21.0620 | <i>L. major</i> | 45  | 357  | 401  |
| LmjF21.0620 | <i>L. major</i> | 65  | 511  | 575  |
| LmjF21.0620 | <i>L. major</i> | 195 | 592  | 786  |
| LmjF21.0630 | <i>L. major</i> | 54  | 146  | 199  |
| LmjF21.0630 | <i>L. major</i> | 40  | 336  | 375  |

|             |                 |      |      |      |
|-------------|-----------------|------|------|------|
| LmjF21.0630 | <i>L. major</i> | 242  | 519  | 760  |
| LmjF21.0650 | <i>L. major</i> | 49   | 87   | 135  |
| LmjF21.0650 | <i>L. major</i> | 94   | 200  | 293  |
| LmjF21.0650 | <i>L. major</i> | 48   | 496  | 543  |
| LmjF21.0660 | <i>L. major</i> | 47   | 1    | 47   |
| LmjF21.0700 | <i>L. major</i> | 379  | 243  | 621  |
| LmjF21.0710 | <i>L. major</i> | 83   | 577  | 659  |
| LmjF21.0720 | <i>L. major</i> | 64   | 68   | 131  |
| LmjF21.0725 | <i>L. major</i> | 45   | 333  | 377  |
| LmjF21.0770 | <i>L. major</i> | 73   | 1    | 73   |
| LmjF21.0770 | <i>L. major</i> | 196  | 302  | 497  |
| LmjF21.0780 | <i>L. major</i> | 107  | 95   | 201  |
| LmjF21.0780 | <i>L. major</i> | 130  | 475  | 604  |
| LmjF21.0780 | <i>L. major</i> | 50   | 615  | 664  |
| LmjF21.0790 | <i>L. major</i> | 151  | 138  | 288  |
| LmjF21.0800 | <i>L. major</i> | 59   | 764  | 822  |
| LmjF21.0800 | <i>L. major</i> | 74   | 1075 | 1148 |
| LmjF21.0800 | <i>L. major</i> | 44   | 1316 | 1359 |
| LmjF21.0800 | <i>L. major</i> | 40   | 1385 | 1424 |
| LmjF21.0800 | <i>L. major</i> | 50   | 1448 | 1497 |
| LmjF21.0820 | <i>L. major</i> | 538  | 1    | 538  |
| LmjF21.0820 | <i>L. major</i> | 49   | 1066 | 1114 |
| LmjF21.0823 | <i>L. major</i> | 53   | 64   | 116  |
| LmjF21.0823 | <i>L. major</i> | 61   | 242  | 302  |
| LmjF21.0823 | <i>L. major</i> | 131  | 393  | 523  |
| LmjF21.0823 | <i>L. major</i> | 77   | 700  | 776  |
| LmjF21.0823 | <i>L. major</i> | 120  | 806  | 925  |
| LmjF21.0825 | <i>L. major</i> | 250  | 1    | 250  |
| LmjF21.0825 | <i>L. major</i> | 524  | 276  | 799  |
| LmjF21.0825 | <i>L. major</i> | 1067 | 856  | 1922 |
| LmjF21.0825 | <i>L. major</i> | 429  | 2002 | 2430 |
| LmjF21.0825 | <i>L. major</i> | 346  | 2440 | 2785 |
| LmjF21.0825 | <i>L. major</i> | 71   | 2797 | 2867 |
| LmjF21.0825 | <i>L. major</i> | 92   | 2875 | 2966 |
| LmjF21.0825 | <i>L. major</i> | 86   | 3005 | 3090 |
| LmjF21.0825 | <i>L. major</i> | 58   | 3123 | 3180 |
| LmjF21.0827 | <i>L. major</i> | 44   | 61   | 104  |
| LmjF21.0830 | <i>L. major</i> | 66   | 257  | 322  |
| LmjF21.0840 | <i>L. major</i> | 163  | 1    | 163  |
| LmjF21.0843 | <i>L. major</i> | 136  | 1    | 136  |
| LmjF21.0843 | <i>L. major</i> | 66   | 254  | 319  |
| LmjF21.0853 | <i>L. major</i> | 157  | 141  | 297  |
| LmjF21.0853 | <i>L. major</i> | 272  | 484  | 755  |
| LmjF21.0853 | <i>L. major</i> | 76   | 759  | 834  |
| LmjF21.0853 | <i>L. major</i> | 338  | 864  | 1201 |
| LmjF21.0853 | <i>L. major</i> | 127  | 1211 | 1337 |
| LmjF21.0853 | <i>L. major</i> | 352  | 1386 | 1737 |

|             |                 |      |      |      |
|-------------|-----------------|------|------|------|
| LmjF21.0853 | <i>L. major</i> | 61   | 1784 | 1844 |
| LmjF21.0853 | <i>L. major</i> | 187  | 1864 | 2050 |
| LmjF21.0853 | <i>L. major</i> | 93   | 2153 | 2245 |
| LmjF21.0855 | <i>L. major</i> | 52   | 1    | 52   |
| LmjF21.0855 | <i>L. major</i> | 57   | 88   | 144  |
| LmjF21.0855 | <i>L. major</i> | 48   | 188  | 235  |
| LmjF21.0861 | <i>L. major</i> | 1598 | 1    | 1598 |
| LmjF21.0861 | <i>L. major</i> | 147  | 1699 | 1845 |
| LmjF21.0861 | <i>L. major</i> | 213  | 1868 | 2080 |
| LmjF21.0861 | <i>L. major</i> | 57   | 2164 | 2220 |
| LmjF21.0861 | <i>L. major</i> | 198  | 2235 | 2432 |
| LmjF21.0861 | <i>L. major</i> | 122  | 2450 | 2571 |
| LmjF21.0865 | <i>L. major</i> | 110  | 1    | 110  |
| LmjF21.0865 | <i>L. major</i> | 42   | 139  | 180  |
| LmjF21.0865 | <i>L. major</i> | 62   | 225  | 286  |
| LmjF21.0865 | <i>L. major</i> | 60   | 383  | 442  |
| LmjF21.0865 | <i>L. major</i> | 51   | 491  | 541  |
| LmjF21.0865 | <i>L. major</i> | 47   | 630  | 676  |
| LmjF21.0870 | <i>L. major</i> | 125  | 1    | 125  |
| LmjF21.0870 | <i>L. major</i> | 99   | 144  | 242  |
| LmjF21.0870 | <i>L. major</i> | 40   | 248  | 287  |
| LmjF21.0870 | <i>L. major</i> | 98   | 319  | 416  |
| LmjF21.0870 | <i>L. major</i> | 187  | 481  | 667  |
| LmjF21.0870 | <i>L. major</i> | 229  | 685  | 913  |
| LmjF21.0873 | <i>L. major</i> | 294  | 562  | 855  |
| LmjF21.0875 | <i>L. major</i> | 48   | 1    | 48   |
| LmjF21.0875 | <i>L. major</i> | 186  | 82   | 267  |
| LmjF21.0875 | <i>L. major</i> | 184  | 285  | 468  |
| LmjF21.0875 | <i>L. major</i> | 87   | 768  | 854  |
| LmjF21.0880 | <i>L. major</i> | 93   | 1    | 93   |
| LmjF21.0880 | <i>L. major</i> | 81   | 295  | 375  |
| LmjF21.0880 | <i>L. major</i> | 54   | 435  | 488  |
| LmjF21.0880 | <i>L. major</i> | 70   | 509  | 578  |
| LmjF21.0885 | <i>L. major</i> | 90   | 1    | 90   |
| LmjF21.0885 | <i>L. major</i> | 140  | 97   | 236  |
| LmjF21.0885 | <i>L. major</i> | 41   | 517  | 557  |
| LmjF21.0885 | <i>L. major</i> | 45   | 580  | 624  |
| LmjF21.0885 | <i>L. major</i> | 67   | 657  | 723  |
| LmjF21.0885 | <i>L. major</i> | 86   | 812  | 897  |
| LmjF21.0885 | <i>L. major</i> | 166  | 982  | 1147 |
| LmjF21.0891 | <i>L. major</i> | 48   | 248  | 295  |
| LmjF21.0891 | <i>L. major</i> | 116  | 437  | 552  |
| LmjF21.0895 | <i>L. major</i> | 155  | 1    | 155  |
| LmjF21.0895 | <i>L. major</i> | 63   | 390  | 452  |
| LmjF21.0901 | <i>L. major</i> | 85   | 1    | 85   |
| LmjF21.0901 | <i>L. major</i> | 97   | 126  | 222  |
| LmjF21.0901 | <i>L. major</i> | 97   | 126  | 222  |

|             |                 |     |      |      |
|-------------|-----------------|-----|------|------|
| LmjF21.0905 | <i>L. major</i> | 51  | 61   | 111  |
| LmjF21.0905 | <i>L. major</i> | 47  | 159  | 205  |
| LmjF21.0905 | <i>L. major</i> | 47  | 159  | 205  |
| LmjF21.0910 | <i>L. major</i> | 85  | 1    | 85   |
| LmjF21.0915 | <i>L. major</i> | 48  | 85   | 132  |
| LmjF21.0920 | <i>L. major</i> | 48  | 85   | 132  |
| LmjF21.0930 | <i>L. major</i> | 48  | 85   | 132  |
| LmjF21.0950 | <i>L. major</i> | 109 | 78   | 186  |
| LmjF21.0950 | <i>L. major</i> | 52  | 279  | 330  |
| LmjF21.0950 | <i>L. major</i> | 66  | 365  | 430  |
| LmjF21.0960 | <i>L. major</i> | 234 | 1    | 234  |
| LmjF21.0960 | <i>L. major</i> | 278 | 271  | 548  |
| LmjF21.0960 | <i>L. major</i> | 100 | 614  | 713  |
| LmjF21.0960 | <i>L. major</i> | 155 | 773  | 927  |
| LmjF21.0960 | <i>L. major</i> | 474 | 978  | 1451 |
| LmjF21.0970 | <i>L. major</i> | 93  | 1    | 93   |
| LmjF21.0970 | <i>L. major</i> | 43  | 116  | 158  |
| LmjF21.0970 | <i>L. major</i> | 117 | 225  | 341  |
| LmjF21.0970 | <i>L. major</i> | 66  | 513  | 578  |
| LmjF21.0970 | <i>L. major</i> | 60  | 654  | 713  |
| LmjF21.1000 | <i>L. major</i> | 69  | 1    | 69   |
| LmjF21.1000 | <i>L. major</i> | 76  | 108  | 183  |
| LmjF21.1000 | <i>L. major</i> | 69  | 222  | 290  |
| LmjF21.1000 | <i>L. major</i> | 884 | 379  | 1262 |
| LmjF21.1000 | <i>L. major</i> | 783 | 1267 | 2049 |
| LmjF21.1010 | <i>L. major</i> | 40  | 202  | 241  |
| LmjF21.1020 | <i>L. major</i> | 76  | 212  | 287  |
| LmjF21.1030 | <i>L. major</i> | 126 | 32   | 157  |
| LmjF21.1030 | <i>L. major</i> | 647 | 168  | 814  |
| LmjF21.1040 | <i>L. major</i> | 58  | 93   | 150  |
| LmjF21.1040 | <i>L. major</i> | 59  | 630  | 688  |
| LmjF21.1040 | <i>L. major</i> | 344 | 847  | 1190 |
| LmjF21.1040 | <i>L. major</i> | 134 | 1313 | 1446 |
| LmjF21.1040 | <i>L. major</i> | 206 | 1617 | 1822 |
| LmjF21.1040 | <i>L. major</i> | 266 | 1856 | 2121 |
| LmjF21.1090 | <i>L. major</i> | 43  | 1    | 43   |
| LmjF21.1100 | <i>L. major</i> | 113 | 37   | 149  |
| LmjF21.1100 | <i>L. major</i> | 53  | 172  | 224  |
| LmjF21.1100 | <i>L. major</i> | 64  | 237  | 300  |
| LmjF21.1100 | <i>L. major</i> | 88  | 613  | 700  |
| LmjF21.1110 | <i>L. major</i> | 47  | 73   | 119  |
| LmjF21.1110 | <i>L. major</i> | 75  | 173  | 247  |
| LmjF21.1110 | <i>L. major</i> | 336 | 468  | 803  |
| LmjF21.1110 | <i>L. major</i> | 124 | 846  | 969  |
| LmjF21.1110 | <i>L. major</i> | 64  | 1247 | 1310 |
| LmjF21.1110 | <i>L. major</i> | 40  | 1513 | 1552 |
| LmjF21.1110 | <i>L. major</i> | 71  | 1591 | 1661 |



|             |                 |     |      |      |
|-------------|-----------------|-----|------|------|
| LmjF21.1110 | <i>L. major</i> | 49  | 1713 | 1761 |
| LmjF21.1120 | <i>L. major</i> | 41  | 209  | 249  |
| LmjF21.1120 | <i>L. major</i> | 78  | 537  | 614  |
| LmjF21.1130 | <i>L. major</i> | 128 | 15   | 142  |
| LmjF21.1130 | <i>L. major</i> | 248 | 207  | 454  |
| LmjF21.1130 | <i>L. major</i> | 67  | 477  | 543  |
| LmjF21.1140 | <i>L. major</i> | 52  | 64   | 115  |
| LmjF21.1140 | <i>L. major</i> | 150 | 154  | 303  |
| LmjF21.1150 | <i>L. major</i> | 325 | 1    | 325  |
| LmjF21.1150 | <i>L. major</i> | 45  | 334  | 378  |
| LmjF21.1150 | <i>L. major</i> | 87  | 380  | 466  |
| LmjF21.1150 | <i>L. major</i> | 169 | 533  | 701  |
| LmjF21.1150 | <i>L. major</i> | 217 | 743  | 959  |
| LmjF21.1150 | <i>L. major</i> | 65  | 987  | 1051 |
| LmjF21.1150 | <i>L. major</i> | 521 | 1061 | 1581 |
| LmjF21.1150 | <i>L. major</i> | 51  | 1602 | 1652 |
| LmjF21.1150 | <i>L. major</i> | 79  | 1654 | 1732 |
| LmjF21.1160 | <i>L. major</i> | 655 | 1    | 655  |
| LmjF21.1160 | <i>L. major</i> | 97  | 723  | 819  |
| LmjF21.1160 | <i>L. major</i> | 52  | 869  | 920  |
| LmjF21.1160 | <i>L. major</i> | 49  | 1086 | 1134 |
| LmjF21.1170 | <i>L. major</i> | 44  | 147  | 190  |
| LmjF21.1180 | <i>L. major</i> | 47  | 141  | 187  |
| LmjF21.1190 | <i>L. major</i> | 142 | 115  | 256  |
| LmjF21.1190 | <i>L. major</i> | 72  | 715  | 786  |
| LmjF21.1200 | <i>L. major</i> | 126 | 56   | 181  |
| LmjF21.1210 | <i>L. major</i> | 104 | 181  | 284  |
| LmjF21.1220 | <i>L. major</i> | 219 | 66   | 284  |
| LmjF21.1220 | <i>L. major</i> | 155 | 380  | 534  |
| LmjF21.1220 | <i>L. major</i> | 376 | 611  | 986  |
| LmjF21.1220 | <i>L. major</i> | 61  | 989  | 1049 |
| LmjF21.1220 | <i>L. major</i> | 300 | 1073 | 1372 |
| LmjF21.1230 | <i>L. major</i> | 93  | 1    | 93   |
| LmjF21.1230 | <i>L. major</i> | 58  | 423  | 480  |
| LmjF21.1230 | <i>L. major</i> | 58  | 524  | 581  |
| LmjF21.1230 | <i>L. major</i> | 45  | 594  | 638  |
| LmjF21.1240 | <i>L. major</i> | 71  | 1    | 71   |
| LmjF21.1240 | <i>L. major</i> | 48  | 419  | 466  |
| LmjF21.1240 | <i>L. major</i> | 201 | 476  | 676  |
| LmjF21.1240 | <i>L. major</i> | 433 | 762  | 1194 |
| LmjF21.1240 | <i>L. major</i> | 44  | 1219 | 1262 |
| LmjF21.1260 | <i>L. major</i> | 74  | 196  | 269  |
| LmjF21.1260 | <i>L. major</i> | 173 | 328  | 500  |
| LmjF21.1270 | <i>L. major</i> | 76  | 316  | 391  |
| LmjF21.1270 | <i>L. major</i> | 96  | 442  | 537  |
| LmjF21.1270 | <i>L. major</i> | 73  | 718  | 790  |
| LmjF21.1280 | <i>L. major</i> | 110 | 1    | 110  |

|             |                 |     |      |      |
|-------------|-----------------|-----|------|------|
| LmjF21.1280 | <i>L. major</i> | 42  | 335  | 376  |
| LmjF21.1295 | <i>L. major</i> | 138 | 98   | 235  |
| LmjF21.1300 | <i>L. major</i> | 130 | 1    | 130  |
| LmjF21.1300 | <i>L. major</i> | 188 | 137  | 324  |
| LmjF21.1300 | <i>L. major</i> | 41  | 389  | 429  |
| LmjF21.1300 | <i>L. major</i> | 50  | 488  | 537  |
| LmjF21.1330 | <i>L. major</i> | 169 | 1    | 169  |
| LmjF21.1330 | <i>L. major</i> | 49  | 368  | 416  |
| LmjF21.1330 | <i>L. major</i> | 253 | 419  | 671  |
| LmjF21.1330 | <i>L. major</i> | 170 | 814  | 983  |
| LmjF21.1330 | <i>L. major</i> | 261 | 990  | 1250 |
| LmjF21.1330 | <i>L. major</i> | 109 | 1484 | 1592 |
| LmjF21.1350 | <i>L. major</i> | 80  | 1    | 80   |
| LmjF21.1350 | <i>L. major</i> | 53  | 103  | 155  |
| LmjF21.1350 | <i>L. major</i> | 360 | 186  | 545  |
| LmjF21.1350 | <i>L. major</i> | 45  | 557  | 601  |
| LmjF21.1350 | <i>L. major</i> | 57  | 807  | 863  |
| LmjF21.1350 | <i>L. major</i> | 98  | 1100 | 1197 |
| LmjF21.1350 | <i>L. major</i> | 463 | 1311 | 1773 |
| LmjF21.1360 | <i>L. major</i> | 52  | 85   | 136  |
| LmjF21.1370 | <i>L. major</i> | 216 | 282  | 497  |
| LmjF21.1370 | <i>L. major</i> | 85  | 529  | 613  |
| LmjF21.1370 | <i>L. major</i> | 74  | 713  | 786  |
| LmjF21.1370 | <i>L. major</i> | 66  | 835  | 900  |
| LmjF21.1370 | <i>L. major</i> | 119 | 931  | 1049 |
| LmjF21.1380 | <i>L. major</i> | 41  | 122  | 162  |
| LmjF21.1380 | <i>L. major</i> | 122 | 246  | 367  |
| LmjF21.1390 | <i>L. major</i> | 107 | 113  | 219  |
| LmjF21.1400 | <i>L. major</i> | 107 | 113  | 219  |
| LmjF21.1410 | <i>L. major</i> | 51  | 1    | 51   |
| LmjF21.1410 | <i>L. major</i> | 74  | 90   | 163  |
| LmjF21.1410 | <i>L. major</i> | 92  | 221  | 312  |
| LmjF21.1430 | <i>L. major</i> | 40  | 75   | 114  |
| LmjF21.1430 | <i>L. major</i> | 40  | 369  | 408  |
| LmjF21.1430 | <i>L. major</i> | 40  | 369  | 408  |
| LmjF21.1450 | <i>L. major</i> | 59  | 117  | 175  |
| LmjF21.1450 | <i>L. major</i> | 112 | 431  | 542  |
| LmjF21.1460 | <i>L. major</i> | 274 | 28   | 301  |
| LmjF21.1460 | <i>L. major</i> | 180 | 332  | 511  |
| LmjF21.1480 | <i>L. major</i> | 182 | 1    | 182  |
| LmjF21.1480 | <i>L. major</i> | 78  | 273  | 350  |
| LmjF21.1480 | <i>L. major</i> | 83  | 362  | 444  |
| LmjF21.1480 | <i>L. major</i> | 300 | 453  | 752  |
| LmjF21.1490 | <i>L. major</i> | 349 | 1    | 349  |
| LmjF21.1490 | <i>L. major</i> | 230 | 441  | 670  |
| LmjF21.1500 | <i>L. major</i> | 56  | 495  | 550  |
| LmjF21.1510 | <i>L. major</i> | 80  | 57   | 136  |

|             |                 |     |      |      |
|-------------|-----------------|-----|------|------|
| LmjF21.1510 | <i>L. major</i> | 269 | 192  | 460  |
| LmjF21.1510 | <i>L. major</i> | 53  | 624  | 676  |
| LmjF21.1510 | <i>L. major</i> | 80  | 716  | 795  |
| LmjF21.1510 | <i>L. major</i> | 41  | 832  | 872  |
| LmjF21.1510 | <i>L. major</i> | 131 | 879  | 1009 |
| LmjF21.1510 | <i>L. major</i> | 164 | 1239 | 1402 |
| LmjF21.1520 | <i>L. major</i> | 95  | 65   | 159  |
| LmjF21.1520 | <i>L. major</i> | 185 | 187  | 371  |
| LmjF21.1530 | <i>L. major</i> | 57  | 452  | 508  |
| LmjF21.1530 | <i>L. major</i> | 62  | 578  | 639  |
| LmjF21.1530 | <i>L. major</i> | 62  | 578  | 639  |
| LmjF21.1540 | <i>L. major</i> | 158 | 1    | 158  |
| LmjF21.1540 | <i>L. major</i> | 47  | 417  | 463  |
| LmjF21.1540 | <i>L. major</i> | 41  | 650  | 690  |
| LmjF21.1540 | <i>L. major</i> | 335 | 1552 | 1886 |
| LmjF21.1552 | <i>L. major</i> | 46  | 390  | 435  |
| LmjF21.1558 | <i>L. major</i> | 89  | 10   | 98   |
| LmjF21.1558 | <i>L. major</i> | 42  | 133  | 174  |
| LmjF21.1558 | <i>L. major</i> | 42  | 133  | 174  |
| LmjF21.1560 | <i>L. major</i> | 251 | 280  | 530  |
| LmjF21.1561 | <i>L. major</i> | 107 | 1    | 107  |
| LmjF21.1561 | <i>L. major</i> | 72  | 170  | 241  |
| LmjF21.1561 | <i>L. major</i> | 167 | 271  | 437  |
| LmjF21.1565 | <i>L. major</i> | 436 | 266  | 701  |
| LmjF21.1566 | <i>L. major</i> | 300 | 82   | 381  |
| LmjF21.1566 | <i>L. major</i> | 52  | 399  | 450  |
| LmjF21.1568 | <i>L. major</i> | 74  | 1    | 74   |
| LmjF21.1569 | <i>L. major</i> | 51  | 126  | 176  |
| LmjF21.1569 | <i>L. major</i> | 51  | 389  | 439  |
| LmjF21.1569 | <i>L. major</i> | 51  | 389  | 439  |
| LmjF21.1580 | <i>L. major</i> | 66  | 324  | 389  |
| LmjF21.1600 | <i>L. major</i> | 48  | 1    | 48   |
| LmjF21.1600 | <i>L. major</i> | 74  | 102  | 175  |
| LmjF21.1600 | <i>L. major</i> | 74  | 102  | 175  |
| LmjF21.1605 | <i>L. major</i> | 48  | 1    | 48   |
| LmjF21.1610 | <i>L. major</i> | 65  | 96   | 160  |
| LmjF21.1650 | <i>L. major</i> | 59  | 31   | 89   |
| LmjF21.1675 | <i>L. major</i> | 74  | 21   | 94   |
| LmjF21.1680 | <i>L. major</i> | 143 | 29   | 171  |
| LmjF21.1680 | <i>L. major</i> | 67  | 503  | 569  |
| LmjF21.1720 | <i>L. major</i> | 63  | 1    | 63   |
| LmjF21.1730 | <i>L. major</i> | 171 | 1    | 171  |
| LmjF21.1750 | <i>L. major</i> | 54  | 131  | 184  |
| LmjF21.1780 | <i>L. major</i> | 120 | 130  | 249  |
| LmjF21.1840 | <i>L. major</i> | 44  | 1    | 44   |
| LmjF21.1840 | <i>L. major</i> | 56  | 91   | 146  |
| LmjF21.1840 | <i>L. major</i> | 286 | 179  | 464  |

|             |                 |     |      |      |
|-------------|-----------------|-----|------|------|
| LmjF21.1850 | <i>L. major</i> | 95  | 1    | 95   |
| LmjF21.1850 | <i>L. major</i> | 72  | 132  | 203  |
| LmjF21.1850 | <i>L. major</i> | 338 | 308  | 645  |
| LmjF21.1860 | <i>L. major</i> | 40  | 404  | 443  |
| LmjF21.1870 | <i>L. major</i> | 57  | 42   | 98   |
| LmjF21.1870 | <i>L. major</i> | 156 | 311  | 466  |
| LmjF21.1880 | <i>L. major</i> | 191 | 53   | 243  |
| LmjF22.0010 | <i>L. major</i> | 58  | 1    | 58   |
| LmjF22.0010 | <i>L. major</i> | 72  | 504  | 575  |
| LmjF22.0010 | <i>L. major</i> | 72  | 504  | 575  |
| LmjF22.0020 | <i>L. major</i> | 48  | 97   | 144  |
| LmjF22.0030 | <i>L. major</i> | 50  | 139  | 188  |
| LmjF22.0050 | <i>L. major</i> | 194 | 1    | 194  |
| LmjF22.0050 | <i>L. major</i> | 267 | 204  | 470  |
| LmjF22.0060 | <i>L. major</i> | 284 | 87   | 370  |
| LmjF22.0060 | <i>L. major</i> | 183 | 372  | 554  |
| LmjF22.0060 | <i>L. major</i> | 183 | 372  | 554  |
| LmjF22.0070 | <i>L. major</i> | 77  | 213  | 289  |
| LmjF22.0080 | <i>L. major</i> | 86  | 52   | 137  |
| LmjF22.0080 | <i>L. major</i> | 53  | 279  | 331  |
| LmjF22.0080 | <i>L. major</i> | 53  | 279  | 331  |
| LmjF22.0090 | <i>L. major</i> | 45  | 683  | 727  |
| LmjF22.0100 | <i>L. major</i> | 56  | 21   | 76   |
| LmjF22.0120 | <i>L. major</i> | 194 | 20   | 213  |
| LmjF22.0140 | <i>L. major</i> | 225 | 174  | 398  |
| LmjF22.0150 | <i>L. major</i> | 61  | 84   | 144  |
| LmjF22.0160 | <i>L. major</i> | 71  | 1    | 71   |
| LmjF22.0160 | <i>L. major</i> | 48  | 166  | 213  |
| LmjF22.0160 | <i>L. major</i> | 148 | 263  | 410  |
| LmjF22.0170 | <i>L. major</i> | 422 | 1    | 422  |
| LmjF22.0180 | <i>L. major</i> | 144 | 1    | 144  |
| LmjF22.0210 | <i>L. major</i> | 145 | 1    | 145  |
| LmjF22.0210 | <i>L. major</i> | 113 | 214  | 326  |
| LmjF22.0210 | <i>L. major</i> | 40  | 386  | 425  |
| LmjF22.0210 | <i>L. major</i> | 129 | 929  | 1057 |
| LmjF22.0210 | <i>L. major</i> | 144 | 1385 | 1528 |
| LmjF22.0220 | <i>L. major</i> | 52  | 692  | 743  |
| LmjF22.0220 | <i>L. major</i> | 43  | 852  | 894  |
| LmjF22.0230 | <i>L. major</i> | 56  | 1    | 56   |
| LmjF22.0240 | <i>L. major</i> | 70  | 1    | 70   |
| LmjF22.0240 | <i>L. major</i> | 237 | 93   | 329  |
| LmjF22.0260 | <i>L. major</i> | 64  | 219  | 282  |
| LmjF22.0280 | <i>L. major</i> | 42  | 364  | 405  |
| LmjF22.0280 | <i>L. major</i> | 50  | 572  | 621  |
| LmjF22.0280 | <i>L. major</i> | 65  | 777  | 841  |
| LmjF22.0290 | <i>L. major</i> | 48  | 216  | 263  |
| LmjF22.0290 | <i>L. major</i> | 62  | 341  | 402  |

|             |                 |     |      |      |
|-------------|-----------------|-----|------|------|
| LmjF22.0290 | <i>L. major</i> | 62  | 341  | 402  |
| LmjF22.0300 | <i>L. major</i> | 57  | 1    | 57   |
| LmjF22.0300 | <i>L. major</i> | 49  | 185  | 233  |
| LmjF22.0300 | <i>L. major</i> | 50  | 415  | 464  |
| LmjF22.0300 | <i>L. major</i> | 75  | 487  | 561  |
| LmjF22.0310 | <i>L. major</i> | 50  | 500  | 549  |
| LmjF22.0320 | <i>L. major</i> | 90  | 43   | 132  |
| LmjF22.0320 | <i>L. major</i> | 51  | 232  | 282  |
| LmjF22.0330 | <i>L. major</i> | 486 | 1    | 486  |
| LmjF22.0330 | <i>L. major</i> | 123 | 511  | 633  |
| LmjF22.0330 | <i>L. major</i> | 62  | 660  | 721  |
| LmjF22.0330 | <i>L. major</i> | 53  | 723  | 775  |
| LmjF22.0330 | <i>L. major</i> | 253 | 790  | 1042 |
| LmjF22.0350 | <i>L. major</i> | 136 | 1    | 136  |
| LmjF22.0360 | <i>L. major</i> | 58  | 1    | 58   |
| LmjF22.0360 | <i>L. major</i> | 60  | 114  | 173  |
| LmjF22.0360 | <i>L. major</i> | 45  | 268  | 312  |
| LmjF22.0370 | <i>L. major</i> | 41  | 45   | 85   |
| LmjF22.0370 | <i>L. major</i> | 43  | 132  | 174  |
| LmjF22.0370 | <i>L. major</i> | 43  | 132  | 174  |
| LmjF22.0380 | <i>L. major</i> | 46  | 1    | 46   |
| LmjF22.0380 | <i>L. major</i> | 105 | 212  | 316  |
| LmjF22.0380 | <i>L. major</i> | 63  | 519  | 581  |
| LmjF22.0380 | <i>L. major</i> | 80  | 687  | 766  |
| LmjF22.0390 | <i>L. major</i> | 48  | 43   | 90   |
| LmjF22.0390 | <i>L. major</i> | 41  | 411  | 451  |
| LmjF22.0390 | <i>L. major</i> | 41  | 411  | 451  |
| LmjF22.0400 | <i>L. major</i> | 104 | 26   | 129  |
| LmjF22.0400 | <i>L. major</i> | 119 | 190  | 308  |
| LmjF22.0400 | <i>L. major</i> | 67  | 416  | 482  |
| LmjF22.0410 | <i>L. major</i> | 51  | 302  | 352  |
| LmjF22.0410 | <i>L. major</i> | 41  | 767  | 807  |
| LmjF22.0410 | <i>L. major</i> | 76  | 1110 | 1185 |
| LmjF22.0420 | <i>L. major</i> | 45  | 39   | 83   |
| LmjF22.0440 | <i>L. major</i> | 123 | 1    | 123  |
| LmjF22.0440 | <i>L. major</i> | 81  | 161  | 241  |
| LmjF22.0440 | <i>L. major</i> | 60  | 276  | 335  |
| LmjF22.0440 | <i>L. major</i> | 165 | 991  | 1155 |
| LmjF22.0450 | <i>L. major</i> | 86  | 1    | 86   |
| LmjF22.0460 | <i>L. major</i> | 45  | 39   | 83   |
| LmjF22.0470 | <i>L. major</i> | 90  | 175  | 264  |
| LmjF22.0480 | <i>L. major</i> | 61  | 209  | 269  |
| LmjF22.0490 | <i>L. major</i> | 42  | 1    | 42   |
| LmjF22.0490 | <i>L. major</i> | 44  | 94   | 137  |
| LmjF22.0490 | <i>L. major</i> | 62  | 248  | 309  |
| LmjF22.0490 | <i>L. major</i> | 122 | 455  | 576  |
| LmjF22.0500 | <i>L. major</i> | 229 | 54   | 282  |

|             |                 |     |      |      |
|-------------|-----------------|-----|------|------|
| LmjF22.0500 | <i>L. major</i> | 53  | 426  | 478  |
| LmjF22.0510 | <i>L. major</i> | 42  | 1    | 42   |
| LmjF22.0510 | <i>L. major</i> | 63  | 85   | 147  |
| LmjF22.0510 | <i>L. major</i> | 97  | 180  | 276  |
| LmjF22.0510 | <i>L. major</i> | 117 | 328  | 444  |
| LmjF22.0510 | <i>L. major</i> | 46  | 526  | 571  |
| LmjF22.0520 | <i>L. major</i> | 154 | 131  | 284  |
| LmjF22.0520 | <i>L. major</i> | 50  | 318  | 367  |
| LmjF22.0520 | <i>L. major</i> | 83  | 493  | 575  |
| LmjF22.0520 | <i>L. major</i> | 136 | 602  | 737  |
| LmjF22.0520 | <i>L. major</i> | 63  | 1059 | 1121 |
| LmjF22.0530 | <i>L. major</i> | 41  | 1    | 41   |
| LmjF22.0530 | <i>L. major</i> | 140 | 169  | 308  |
| LmjF22.0540 | <i>L. major</i> | 54  | 93   | 146  |
| LmjF22.0540 | <i>L. major</i> | 154 | 236  | 389  |
| LmjF22.0540 | <i>L. major</i> | 45  | 521  | 565  |
| LmjF22.0540 | <i>L. major</i> | 131 | 701  | 831  |
| LmjF22.0560 | <i>L. major</i> | 40  | 152  | 191  |
| LmjF22.0560 | <i>L. major</i> | 114 | 227  | 340  |
| LmjF22.0560 | <i>L. major</i> | 239 | 485  | 723  |
| LmjF22.0560 | <i>L. major</i> | 49  | 756  | 804  |
| LmjF22.0570 | <i>L. major</i> | 52  | 307  | 358  |
| LmjF22.0590 | <i>L. major</i> | 81  | 94   | 174  |
| LmjF22.0590 | <i>L. major</i> | 75  | 304  | 378  |
| LmjF22.0590 | <i>L. major</i> | 75  | 304  | 378  |
| LmjF22.0600 | <i>L. major</i> | 61  | 110  | 170  |
| LmjF22.0600 | <i>L. major</i> | 45  | 281  | 325  |
| LmjF22.0600 | <i>L. major</i> | 75  | 395  | 469  |
| LmjF22.0610 | <i>L. major</i> | 105 | 1    | 105  |
| LmjF22.0610 | <i>L. major</i> | 57  | 204  | 260  |
| LmjF22.0620 | <i>L. major</i> | 129 | 1    | 129  |
| LmjF22.0630 | <i>L. major</i> | 275 | 1    | 275  |
| LmjF22.0630 | <i>L. major</i> | 268 | 319  | 586  |
| LmjF22.0630 | <i>L. major</i> | 96  | 602  | 697  |
| LmjF22.0630 | <i>L. major</i> | 193 | 723  | 915  |
| LmjF22.0630 | <i>L. major</i> | 96  | 926  | 1021 |
| LmjF22.0630 | <i>L. major</i> | 71  | 1071 | 1141 |
| LmjF22.0640 | <i>L. major</i> | 176 | 62   | 237  |
| LmjF22.0640 | <i>L. major</i> | 51  | 545  | 595  |
| LmjF22.0640 | <i>L. major</i> | 42  | 991  | 1032 |
| LmjF22.0640 | <i>L. major</i> | 67  | 1271 | 1337 |
| LmjF22.0640 | <i>L. major</i> | 57  | 1515 | 1571 |
| LmjF22.0660 | <i>L. major</i> | 274 | 1    | 274  |
| LmjF22.0660 | <i>L. major</i> | 125 | 308  | 432  |
| LmjF22.0660 | <i>L. major</i> | 72  | 458  | 529  |
| LmjF22.0660 | <i>L. major</i> | 53  | 803  | 855  |
| LmjF22.0660 | <i>L. major</i> | 83  | 971  | 1053 |

|             |                 |     |      |      |
|-------------|-----------------|-----|------|------|
| LmjF22.0670 | <i>L. major</i> | 42  | 116  | 157  |
| LmjF22.0690 | <i>L. major</i> | 114 | 103  | 216  |
| LmjF22.0690 | <i>L. major</i> | 125 | 316  | 440  |
| LmjF22.0690 | <i>L. major</i> | 49  | 467  | 515  |
| LmjF22.0690 | <i>L. major</i> | 69  | 531  | 599  |
| LmjF22.0700 | <i>L. major</i> | 798 | 1    | 798  |
| LmjF22.0700 | <i>L. major</i> | 95  | 810  | 904  |
| LmjF22.0700 | <i>L. major</i> | 230 | 916  | 1145 |
| LmjF22.0700 | <i>L. major</i> | 337 | 1189 | 1525 |
| LmjF22.0720 | <i>L. major</i> | 179 | 67   | 245  |
| LmjF22.0720 | <i>L. major</i> | 69  | 320  | 388  |
| LmjF22.0720 | <i>L. major</i> | 190 | 641  | 830  |
| LmjF22.0720 | <i>L. major</i> | 70  | 833  | 902  |
| LmjF22.0720 | <i>L. major</i> | 118 | 904  | 1021 |
| LmjF22.0720 | <i>L. major</i> | 56  | 1025 | 1080 |
| LmjF22.0730 | <i>L. major</i> | 160 | 1    | 160  |
| LmjF22.0730 | <i>L. major</i> | 162 | 264  | 425  |
| LmjF22.0740 | <i>L. major</i> | 172 | 241  | 412  |
| LmjF22.0740 | <i>L. major</i> | 120 | 434  | 553  |
| LmjF22.0750 | <i>L. major</i> | 72  | 10   | 81   |
| LmjF22.0750 | <i>L. major</i> | 149 | 104  | 252  |
| LmjF22.0750 | <i>L. major</i> | 79  | 267  | 345  |
| LmjF22.0750 | <i>L. major</i> | 92  | 347  | 438  |
| LmjF22.0750 | <i>L. major</i> | 208 | 459  | 666  |
| LmjF22.0750 | <i>L. major</i> | 277 | 855  | 1131 |
| LmjF22.0770 | <i>L. major</i> | 42  | 248  | 289  |
| LmjF22.0780 | <i>L. major</i> | 51  | 1    | 51   |
| LmjF22.0780 | <i>L. major</i> | 42  | 248  | 289  |
| LmjF22.0780 | <i>L. major</i> | 42  | 248  | 289  |
| LmjF22.0790 | <i>L. major</i> | 51  | 215  | 265  |
| LmjF22.0800 | <i>L. major</i> | 83  | 140  | 222  |
| LmjF22.0810 | <i>L. major</i> | 88  | 285  | 372  |
| LmjF22.0820 | <i>L. major</i> | 51  | 1    | 51   |
| LmjF22.0820 | <i>L. major</i> | 69  | 126  | 194  |
| LmjF22.0820 | <i>L. major</i> | 384 | 447  | 830  |
| LmjF22.0820 | <i>L. major</i> | 56  | 834  | 889  |
| LmjF22.0840 | <i>L. major</i> | 798 | 1    | 798  |
| LmjF22.0840 | <i>L. major</i> | 95  | 810  | 904  |
| LmjF22.0840 | <i>L. major</i> | 128 | 916  | 1043 |
| LmjF22.0840 | <i>L. major</i> | 96  | 1050 | 1145 |
| LmjF22.0840 | <i>L. major</i> | 337 | 1189 | 1525 |
| LmjF22.0850 | <i>L. major</i> | 106 | 111  | 216  |
| LmjF22.0850 | <i>L. major</i> | 125 | 316  | 440  |
| LmjF22.0850 | <i>L. major</i> | 49  | 467  | 515  |
| LmjF22.0850 | <i>L. major</i> | 69  | 531  | 599  |
| LmjF22.0860 | <i>L. major</i> | 86  | 117  | 202  |
| LmjF22.0860 | <i>L. major</i> | 47  | 406  | 452  |

|             |                 |     |      |      |
|-------------|-----------------|-----|------|------|
| LmjF22.0860 | <i>L. major</i> | 80  | 672  | 751  |
| LmjF22.0860 | <i>L. major</i> | 47  | 803  | 849  |
| LmjF22.0880 | <i>L. major</i> | 110 | 67   | 176  |
| LmjF22.0880 | <i>L. major</i> | 142 | 196  | 337  |
| LmjF22.0880 | <i>L. major</i> | 70  | 393  | 462  |
| LmjF22.0880 | <i>L. major</i> | 95  | 546  | 640  |
| LmjF22.0890 | <i>L. major</i> | 90  | 1    | 90   |
| LmjF22.0900 | <i>L. major</i> | 247 | 1    | 247  |
| LmjF22.0900 | <i>L. major</i> | 118 | 598  | 715  |
| LmjF22.0900 | <i>L. major</i> | 69  | 748  | 816  |
| LmjF22.0910 | <i>L. major</i> | 170 | 1    | 170  |
| LmjF22.0910 | <i>L. major</i> | 55  | 199  | 253  |
| LmjF22.0920 | <i>L. major</i> | 57  | 69   | 125  |
| LmjF22.0920 | <i>L. major</i> | 46  | 129  | 174  |
| LmjF22.0920 | <i>L. major</i> | 85  | 405  | 489  |
| LmjF22.0920 | <i>L. major</i> | 92  | 736  | 827  |
| LmjF22.0930 | <i>L. major</i> | 46  | 465  | 510  |
| LmjF22.0930 | <i>L. major</i> | 76  | 611  | 686  |
| LmjF22.0930 | <i>L. major</i> | 76  | 611  | 686  |
| LmjF22.0940 | <i>L. major</i> | 46  | 478  | 523  |
| LmjF22.0940 | <i>L. major</i> | 76  | 624  | 699  |
| LmjF22.0940 | <i>L. major</i> | 76  | 624  | 699  |
| LmjF22.0960 | <i>L. major</i> | 58  | 21   | 78   |
| LmjF22.0960 | <i>L. major</i> | 98  | 355  | 452  |
| LmjF22.0960 | <i>L. major</i> | 430 | 471  | 900  |
| LmjF22.0960 | <i>L. major</i> | 347 | 911  | 1257 |
| LmjF22.0970 | <i>L. major</i> | 441 | 58   | 498  |
| LmjF22.0970 | <i>L. major</i> | 388 | 613  | 1000 |
| LmjF22.0970 | <i>L. major</i> | 91  | 1035 | 1125 |
| LmjF22.0970 | <i>L. major</i> | 177 | 1207 | 1383 |
| LmjF22.0970 | <i>L. major</i> | 449 | 1470 | 1918 |
| LmjF22.0980 | <i>L. major</i> | 61  | 1    | 61   |
| LmjF22.0980 | <i>L. major</i> | 53  | 398  | 450  |
| LmjF22.0980 | <i>L. major</i> | 53  | 398  | 450  |
| LmjF22.0990 | <i>L. major</i> | 45  | 139  | 183  |
| LmjF22.0990 | <i>L. major</i> | 59  | 715  | 773  |
| LmjF22.0990 | <i>L. major</i> | 54  | 872  | 925  |
| LmjF22.0990 | <i>L. major</i> | 79  | 1189 | 1267 |
| LmjF22.1000 | <i>L. major</i> | 85  | 97   | 181  |
| LmjF22.1000 | <i>L. major</i> | 106 | 186  | 291  |
| LmjF22.1000 | <i>L. major</i> | 60  | 375  | 434  |
| LmjF22.1010 | <i>L. major</i> | 43  | 254  | 296  |
| LmjF22.1010 | <i>L. major</i> | 84  | 497  | 580  |
| LmjF22.1020 | <i>L. major</i> | 173 | 1    | 173  |
| LmjF22.1020 | <i>L. major</i> | 47  | 298  | 344  |
| LmjF22.1020 | <i>L. major</i> | 42  | 384  | 425  |
| LmjF22.1030 | <i>L. major</i> | 236 | 21   | 256  |



|             |                 |     |      |      |
|-------------|-----------------|-----|------|------|
| LmjF22.1030 | <i>L. major</i> | 40  | 477  | 516  |
| LmjF22.1030 | <i>L. major</i> | 82  | 782  | 863  |
| LmjF22.1030 | <i>L. major</i> | 49  | 1187 | 1235 |
| LmjF22.1040 | <i>L. major</i> | 60  | 93   | 152  |
| LmjF22.1040 | <i>L. major</i> | 69  | 181  | 249  |
| LmjF22.1040 | <i>L. major</i> | 221 | 300  | 520  |
| LmjF22.1040 | <i>L. major</i> | 88  | 652  | 739  |
| LmjF22.1050 | <i>L. major</i> | 101 | 1    | 101  |
| LmjF22.1050 | <i>L. major</i> | 83  | 295  | 377  |
| LmjF22.1050 | <i>L. major</i> | 148 | 672  | 819  |
| LmjF22.1050 | <i>L. major</i> | 60  | 868  | 927  |
| LmjF22.1070 | <i>L. major</i> | 110 | 1    | 110  |
| LmjF22.1070 | <i>L. major</i> | 322 | 138  | 459  |
| LmjF22.1070 | <i>L. major</i> | 178 | 490  | 667  |
| LmjF22.1070 | <i>L. major</i> | 64  | 699  | 762  |
| LmjF22.1080 | <i>L. major</i> | 65  | 1    | 65   |
| LmjF22.1080 | <i>L. major</i> | 68  | 129  | 196  |
| LmjF22.1090 | <i>L. major</i> | 56  | 1    | 56   |
| LmjF22.1090 | <i>L. major</i> | 47  | 174  | 220  |
| LmjF22.1090 | <i>L. major</i> | 173 | 355  | 527  |
| LmjF22.1090 | <i>L. major</i> | 67  | 538  | 604  |
| LmjF22.1090 | <i>L. major</i> | 41  | 662  | 702  |
| LmjF22.1100 | <i>L. major</i> | 112 | 76   | 187  |
| LmjF22.1100 | <i>L. major</i> | 142 | 220  | 361  |
| LmjF22.1100 | <i>L. major</i> | 91  | 433  | 523  |
| LmjF22.1100 | <i>L. major</i> | 96  | 531  | 626  |
| LmjF22.1100 | <i>L. major</i> | 387 | 676  | 1062 |
| LmjF22.1100 | <i>L. major</i> | 52  | 1097 | 1148 |
| LmjF22.1100 | <i>L. major</i> | 61  | 1176 | 1236 |
| LmjF22.1100 | <i>L. major</i> | 230 | 1238 | 1467 |
| LmjF22.1100 | <i>L. major</i> | 69  | 1473 | 1541 |
| LmjF22.1100 | <i>L. major</i> | 63  | 1574 | 1636 |
| LmjF22.1100 | <i>L. major</i> | 180 | 1653 | 1832 |
| LmjF22.1100 | <i>L. major</i> | 59  | 1857 | 1915 |
| LmjF22.1100 | <i>L. major</i> | 98  | 1945 | 2042 |
| LmjF22.1100 | <i>L. major</i> | 202 | 2068 | 2269 |
| LmjF22.1100 | <i>L. major</i> | 109 | 2321 | 2429 |
| LmjF22.1110 | <i>L. major</i> | 70  | 116  | 185  |
| LmjF22.1110 | <i>L. major</i> | 64  | 293  | 356  |
| LmjF22.1110 | <i>L. major</i> | 93  | 1033 | 1125 |
| LmjF22.1110 | <i>L. major</i> | 41  | 1443 | 1483 |
| LmjF22.1110 | <i>L. major</i> | 91  | 2994 | 3084 |
| LmjF22.1110 | <i>L. major</i> | 62  | 3716 | 3777 |
| LmjF22.1110 | <i>L. major</i> | 100 | 3950 | 4049 |
| LmjF22.1110 | <i>L. major</i> | 50  | 4688 | 4737 |
| LmjF22.1110 | <i>L. major</i> | 45  | 5465 | 5509 |
| LmjF22.1120 | <i>L. major</i> | 53  | 71   | 123  |

|             |                 |     |      |      |
|-------------|-----------------|-----|------|------|
| LmjF22.1150 | <i>L. major</i> | 59  | 1    | 59   |
| LmjF22.1150 | <i>L. major</i> | 283 | 738  | 1020 |
| LmjF22.1160 | <i>L. major</i> | 77  | 85   | 161  |
| LmjF22.1170 | <i>L. major</i> | 129 | 118  | 246  |
| LmjF22.1170 | <i>L. major</i> | 156 | 431  | 586  |
| LmjF22.1170 | <i>L. major</i> | 43  | 615  | 657  |
| LmjF22.1170 | <i>L. major</i> | 240 | 660  | 899  |
| LmjF22.1180 | <i>L. major</i> | 316 | 264  | 579  |
| LmjF22.1200 | <i>L. major</i> | 58  | 1    | 58   |
| LmjF22.1200 | <i>L. major</i> | 40  | 174  | 213  |
| LmjF22.1210 | <i>L. major</i> | 162 | 97   | 258  |
| LmjF22.1210 | <i>L. major</i> | 458 | 268  | 725  |
| LmjF22.1210 | <i>L. major</i> | 50  | 801  | 850  |
| LmjF22.1210 | <i>L. major</i> | 47  | 1041 | 1087 |
| LmjF22.1210 | <i>L. major</i> | 171 | 1126 | 1296 |
| LmjF22.1210 | <i>L. major</i> | 48  | 1412 | 1459 |
| LmjF22.1210 | <i>L. major</i> | 162 | 1522 | 1683 |
| LmjF22.1225 | <i>L. major</i> | 203 | 1    | 203  |
| LmjF22.1230 | <i>L. major</i> | 60  | 1    | 60   |
| LmjF22.1230 | <i>L. major</i> | 68  | 227  | 294  |
| LmjF22.1230 | <i>L. major</i> | 59  | 812  | 870  |
| LmjF22.1240 | <i>L. major</i> | 62  | 1    | 62   |
| LmjF22.1240 | <i>L. major</i> | 49  | 96   | 144  |
| LmjF22.1240 | <i>L. major</i> | 62  | 714  | 775  |
| LmjF22.1250 | <i>L. major</i> | 88  | 244  | 331  |
| LmjF22.1260 | <i>L. major</i> | 324 | 146  | 469  |
| LmjF22.1260 | <i>L. major</i> | 42  | 477  | 518  |
| LmjF22.1260 | <i>L. major</i> | 50  | 529  | 578  |
| LmjF22.1260 | <i>L. major</i> | 60  | 609  | 668  |
| LmjF22.1260 | <i>L. major</i> | 325 | 713  | 1037 |
| LmjF22.1270 | <i>L. major</i> | 73  | 81   | 153  |
| LmjF22.1270 | <i>L. major</i> | 61  | 307  | 367  |
| LmjF22.1280 | <i>L. major</i> | 42  | 123  | 164  |
| LmjF22.1280 | <i>L. major</i> | 65  | 189  | 253  |
| LmjF22.1280 | <i>L. major</i> | 65  | 189  | 253  |
| LmjF22.1290 | <i>L. major</i> | 76  | 1    | 76   |
| LmjF22.1300 | <i>L. major</i> | 113 | 1    | 113  |
| LmjF22.1310 | <i>L. major</i> | 454 | 1    | 454  |
| LmjF22.1310 | <i>L. major</i> | 112 | 472  | 583  |
| LmjF22.1310 | <i>L. major</i> | 236 | 599  | 834  |
| LmjF22.1310 | <i>L. major</i> | 130 | 846  | 975  |
| LmjF22.1310 | <i>L. major</i> | 49  | 1038 | 1086 |
| LmjF22.1310 | <i>L. major</i> | 48  | 1094 | 1141 |
| LmjF22.1320 | <i>L. major</i> | 68  | 1    | 68   |
| LmjF22.1320 | <i>L. major</i> | 62  | 138  | 199  |
| LmjF22.1320 | <i>L. major</i> | 96  | 415  | 510  |
| LmjF22.1320 | <i>L. major</i> | 277 | 536  | 812  |

|             |                 |      |      |      |
|-------------|-----------------|------|------|------|
| LmjF22.1320 | <i>L. major</i> | 53   | 916  | 968  |
| LmjF22.1320 | <i>L. major</i> | 686  | 1073 | 1758 |
| LmjF22.1320 | <i>L. major</i> | 79   | 1799 | 1877 |
| LmjF22.1320 | <i>L. major</i> | 80   | 1882 | 1961 |
| LmjF22.1320 | <i>L. major</i> | 67   | 1980 | 2046 |
| LmjF22.1330 | <i>L. major</i> | 408  | 1    | 408  |
| LmjF22.1330 | <i>L. major</i> | 1062 | 412  | 1473 |
| LmjF22.1330 | <i>L. major</i> | 90   | 1640 | 1729 |
| LmjF22.1330 | <i>L. major</i> | 67   | 1731 | 1797 |
| LmjF22.1330 | <i>L. major</i> | 50   | 1829 | 1878 |
| LmjF22.1330 | <i>L. major</i> | 99   | 1911 | 2009 |
| LmjF22.1350 | <i>L. major</i> | 142  | 254  | 395  |
| LmjF22.1370 | <i>L. major</i> | 108  | 35   | 142  |
| LmjF22.1370 | <i>L. major</i> | 249  | 180  | 428  |
| LmjF22.1380 | <i>L. major</i> | 148  | 120  | 267  |
| LmjF22.1390 | <i>L. major</i> | 65   | 1    | 65   |
| LmjF22.1390 | <i>L. major</i> | 42   | 149  | 190  |
| LmjF22.1390 | <i>L. major</i> | 42   | 149  | 190  |
| LmjF22.1410 | <i>L. major</i> | 56   | 94   | 149  |
| LmjF22.1420 | <i>L. major</i> | 51   | 1    | 51   |
| LmjF22.1440 | <i>L. major</i> | 52   | 1    | 52   |
| LmjF22.1440 | <i>L. major</i> | 65   | 84   | 148  |
| LmjF22.1440 | <i>L. major</i> | 72   | 396  | 467  |
| LmjF22.1460 | <i>L. major</i> | 57   | 150  | 206  |
| LmjF22.1470 | <i>L. major</i> | 40   | 155  | 194  |
| LmjF22.1470 | <i>L. major</i> | 83   | 197  | 279  |
| LmjF22.1470 | <i>L. major</i> | 83   | 197  | 279  |
| LmjF22.1480 | <i>L. major</i> | 41   | 11   | 51   |
| LmjF22.1500 | <i>L. major</i> | 52   | 1036 | 1087 |
| LmjF22.1510 | <i>L. major</i> | 157  | 64   | 220  |
| LmjF22.1520 | <i>L. major</i> | 44   | 68   | 111  |
| LmjF22.1520 | <i>L. major</i> | 51   | 125  | 175  |
| LmjF22.1520 | <i>L. major</i> | 51   | 125  | 175  |
| LmjF22.1540 | <i>L. major</i> | 43   | 920  | 962  |
| LmjF22.1550 | <i>L. major</i> | 53   | 392  | 444  |
| LmjF22.1560 | <i>L. major</i> | 44   | 68   | 111  |
| LmjF22.1560 | <i>L. major</i> | 51   | 125  | 175  |
| LmjF22.1560 | <i>L. major</i> | 51   | 125  | 175  |
| LmjF22.1570 | <i>L. major</i> | 140  | 17   | 156  |
| LmjF22.1570 | <i>L. major</i> | 82   | 178  | 259  |
| LmjF22.1570 | <i>L. major</i> | 82   | 284  | 365  |
| LmjF22.1580 | <i>L. major</i> | 41   | 219  | 259  |
| LmjF22.1590 | <i>L. major</i> | 78   | 234  | 311  |
| LmjF22.1600 | <i>L. major</i> | 312  | 1    | 312  |
| LmjF22.1600 | <i>L. major</i> | 122  | 563  | 684  |
| LmjF22.1610 | <i>L. major</i> | 88   | 360  | 447  |
| LmjF22.1620 | <i>L. major</i> | 59   | 1    | 59   |

|             |                 |     |      |      |
|-------------|-----------------|-----|------|------|
| LmjF22.1620 | <i>L. major</i> | 58  | 476  | 533  |
| LmjF22.1620 | <i>L. major</i> | 52  | 1088 | 1139 |
| LmjF22.1620 | <i>L. major</i> | 82  | 1416 | 1497 |
| LmjF22.1620 | <i>L. major</i> | 53  | 1771 | 1823 |
| LmjF22.1630 | <i>L. major</i> | 54  | 285  | 338  |
| LmjF22.1660 | <i>L. major</i> | 127 | 33   | 159  |
| LmjF22.1660 | <i>L. major</i> | 80  | 493  | 572  |
| LmjF22.1660 | <i>L. major</i> | 80  | 493  | 572  |
| LmjF22.1680 | <i>L. major</i> | 110 | 319  | 428  |
| LmjF22.1690 | <i>L. major</i> | 509 | 117  | 625  |
| LmjF22.1690 | <i>L. major</i> | 389 | 661  | 1049 |
| LmjF22.1690 | <i>L. major</i> | 794 | 1197 | 1990 |
| LmjF22.1690 | <i>L. major</i> | 114 | 2009 | 2122 |
| LmjF22.1690 | <i>L. major</i> | 55  | 2145 | 2199 |
| LmjF22.1700 | <i>L. major</i> | 114 | 2739 | 2852 |
| LmjF23.0020 | <i>L. major</i> | 76  | 183  | 258  |
| LmjF23.0050 | <i>L. major</i> | 124 | 172  | 295  |
| LmjF23.0060 | <i>L. major</i> | 149 | 25   | 173  |
| LmjF23.0080 | <i>L. major</i> | 238 | 1    | 238  |
| LmjF23.0080 | <i>L. major</i> | 45  | 248  | 292  |
| LmjF23.0080 | <i>L. major</i> | 57  | 363  | 419  |
| LmjF23.0090 | <i>L. major</i> | 138 | 209  | 346  |
| LmjF23.0120 | <i>L. major</i> | 49  | 1411 | 1459 |
| LmjF23.0120 | <i>L. major</i> | 68  | 1523 | 1590 |
| LmjF23.0120 | <i>L. major</i> | 68  | 1523 | 1590 |
| LmjF23.0160 | <i>L. major</i> | 48  | 34   | 81   |
| LmjF23.0170 | <i>L. major</i> | 76  | 85   | 160  |
| LmjF23.0190 | <i>L. major</i> | 125 | 1    | 125  |
| LmjF23.0210 | <i>L. major</i> | 42  | 1    | 42   |
| LmjF23.0210 | <i>L. major</i> | 42  | 172  | 213  |
| LmjF23.0210 | <i>L. major</i> | 61  | 606  | 666  |
| LmjF23.0210 | <i>L. major</i> | 67  | 875  | 941  |
| LmjF23.0220 | <i>L. major</i> | 50  | 1    | 50   |
| LmjF23.0220 | <i>L. major</i> | 66  | 615  | 680  |
| LmjF23.0220 | <i>L. major</i> | 55  | 887  | 941  |
| LmjF23.0223 | <i>L. major</i> | 60  | 1    | 60   |
| LmjF23.0225 | <i>L. major</i> | 159 | 33   | 191  |
| LmjF23.0230 | <i>L. major</i> | 44  | 1    | 44   |
| LmjF23.0230 | <i>L. major</i> | 40  | 122  | 161  |
| LmjF23.0230 | <i>L. major</i> | 40  | 122  | 161  |
| LmjF23.0250 | <i>L. major</i> | 45  | 625  | 669  |
| LmjF23.0250 | <i>L. major</i> | 53  | 881  | 933  |
| LmjF23.0250 | <i>L. major</i> | 53  | 881  | 933  |
| LmjF23.0280 | <i>L. major</i> | 195 | 1    | 195  |
| LmjF23.0280 | <i>L. major</i> | 142 | 294  | 435  |
| LmjF23.0280 | <i>L. major</i> | 85  | 511  | 595  |
| LmjF23.0280 | <i>L. major</i> | 97  | 612  | 708  |

|             |                 |     |      |      |
|-------------|-----------------|-----|------|------|
| LmjF23.0280 | <i>L. major</i> | 49  | 765  | 813  |
| LmjF23.0280 | <i>L. major</i> | 63  | 1038 | 1100 |
| LmjF23.0300 | <i>L. major</i> | 64  | 1    | 64   |
| LmjF23.0310 | <i>L. major</i> | 91  | 11   | 101  |
| LmjF23.0310 | <i>L. major</i> | 69  | 198  | 266  |
| LmjF23.0310 | <i>L. major</i> | 77  | 346  | 422  |
| LmjF23.0310 | <i>L. major</i> | 44  | 508  | 551  |
| LmjF23.0310 | <i>L. major</i> | 76  | 750  | 825  |
| LmjF23.0310 | <i>L. major</i> | 77  | 946  | 1022 |
| LmjF23.0320 | <i>L. major</i> | 41  | 1    | 41   |
| LmjF23.0320 | <i>L. major</i> | 42  | 77   | 118  |
| LmjF23.0320 | <i>L. major</i> | 61  | 146  | 206  |
| LmjF23.0340 | <i>L. major</i> | 97  | 1    | 97   |
| LmjF23.0350 | <i>L. major</i> | 55  | 1    | 55   |
| LmjF23.0350 | <i>L. major</i> | 112 | 183  | 294  |
| LmjF23.0355 | <i>L. major</i> | 54  | 114  | 167  |
| LmjF23.0380 | <i>L. major</i> | 101 | 475  | 575  |
| LmjF23.0380 | <i>L. major</i> | 70  | 871  | 940  |
| LmjF23.0390 | <i>L. major</i> | 147 | 39   | 185  |
| LmjF23.0390 | <i>L. major</i> | 59  | 208  | 266  |
| LmjF23.0390 | <i>L. major</i> | 53  | 462  | 514  |
| LmjF23.0390 | <i>L. major</i> | 74  | 574  | 647  |
| LmjF23.0390 | <i>L. major</i> | 180 | 672  | 851  |
| LmjF23.0390 | <i>L. major</i> | 48  | 914  | 961  |
| LmjF23.0390 | <i>L. major</i> | 58  | 1197 | 1254 |
| LmjF23.0390 | <i>L. major</i> | 215 | 1271 | 1485 |
| LmjF23.0390 | <i>L. major</i> | 94  | 1736 | 1829 |
| LmjF23.0390 | <i>L. major</i> | 75  | 1906 | 1980 |
| LmjF23.0410 | <i>L. major</i> | 206 | 1    | 206  |
| LmjF23.0410 | <i>L. major</i> | 107 | 343  | 449  |
| LmjF23.0410 | <i>L. major</i> | 52  | 657  | 708  |
| LmjF23.0410 | <i>L. major</i> | 56  | 936  | 991  |
| LmjF23.0410 | <i>L. major</i> | 93  | 1201 | 1293 |
| LmjF23.0420 | <i>L. major</i> | 68  | 1    | 68   |
| LmjF23.0440 | <i>L. major</i> | 63  | 146  | 208  |
| LmjF23.0460 | <i>L. major</i> | 71  | 1    | 71   |
| LmjF23.0460 | <i>L. major</i> | 46  | 153  | 198  |
| LmjF23.0470 | <i>L. major</i> | 187 | 1    | 187  |
| LmjF23.0470 | <i>L. major</i> | 56  | 220  | 275  |
| LmjF23.0470 | <i>L. major</i> | 70  | 280  | 349  |
| LmjF23.0480 | <i>L. major</i> | 637 | 1    | 637  |
| LmjF23.0480 | <i>L. major</i> | 139 | 647  | 785  |
| LmjF23.0480 | <i>L. major</i> | 66  | 824  | 889  |
| LmjF23.0480 | <i>L. major</i> | 207 | 930  | 1136 |
| LmjF23.0480 | <i>L. major</i> | 47  | 1348 | 1394 |
| LmjF23.0490 | <i>L. major</i> | 41  | 101  | 141  |
| LmjF23.0530 | <i>L. major</i> | 68  | 218  | 285  |

|             |                 |     |      |      |
|-------------|-----------------|-----|------|------|
| LmjF23.0540 | <i>L. major</i> | 60  | 1    | 60   |
| LmjF23.0542 | <i>L. major</i> | 87  | 84   | 170  |
| LmjF23.0543 | <i>L. major</i> | 93  | 264  | 356  |
| LmjF23.0543 | <i>L. major</i> | 50  | 474  | 523  |
| LmjF23.0543 | <i>L. major</i> | 103 | 750  | 852  |
| LmjF23.0543 | <i>L. major</i> | 135 | 934  | 1068 |
| LmjF23.0547 | <i>L. major</i> | 70  | 281  | 350  |
| LmjF23.0547 | <i>L. major</i> | 303 | 436  | 738  |
| LmjF23.0560 | <i>L. major</i> | 49  | 402  | 450  |
| LmjF23.0560 | <i>L. major</i> | 173 | 484  | 656  |
| LmjF23.0560 | <i>L. major</i> | 173 | 484  | 656  |
| LmjF23.0570 | <i>L. major</i> | 92  | 1    | 92   |
| LmjF23.0570 | <i>L. major</i> | 68  | 174  | 241  |
| LmjF23.0570 | <i>L. major</i> | 210 | 265  | 474  |
| LmjF23.0570 | <i>L. major</i> | 48  | 507  | 554  |
| LmjF23.0570 | <i>L. major</i> | 64  | 737  | 800  |
| LmjF23.0570 | <i>L. major</i> | 123 | 834  | 956  |
| LmjF23.0580 | <i>L. major</i> | 185 | 26   | 210  |
| LmjF23.0580 | <i>L. major</i> | 95  | 310  | 404  |
| LmjF23.0580 | <i>L. major</i> | 49  | 788  | 836  |
| LmjF23.0580 | <i>L. major</i> | 101 | 863  | 963  |
| LmjF23.0580 | <i>L. major</i> | 85  | 1017 | 1101 |
| LmjF23.0590 | <i>L. major</i> | 90  | 89   | 178  |
| LmjF23.0590 | <i>L. major</i> | 220 | 192  | 411  |
| LmjF23.0600 | <i>L. major</i> | 134 | 128  | 261  |
| LmjF23.0610 | <i>L. major</i> | 66  | 161  | 226  |
| LmjF23.0610 | <i>L. major</i> | 80  | 247  | 326  |
| LmjF23.0610 | <i>L. major</i> | 227 | 382  | 608  |
| LmjF23.0620 | <i>L. major</i> | 89  | 1    | 89   |
| LmjF23.0620 | <i>L. major</i> | 217 | 464  | 680  |
| LmjF23.0630 | <i>L. major</i> | 151 | 36   | 186  |
| LmjF23.0630 | <i>L. major</i> | 156 | 285  | 440  |
| LmjF23.0630 | <i>L. major</i> | 68  | 988  | 1055 |
| LmjF23.0640 | <i>L. major</i> | 181 | 33   | 213  |
| LmjF23.0640 | <i>L. major</i> | 41  | 515  | 555  |
| LmjF23.0650 | <i>L. major</i> | 58  | 37   | 94   |
| LmjF23.0660 | <i>L. major</i> | 83  | 1    | 83   |
| LmjF23.0660 | <i>L. major</i> | 49  | 182  | 230  |
| LmjF23.0660 | <i>L. major</i> | 56  | 245  | 300  |
| LmjF23.0660 | <i>L. major</i> | 136 | 380  | 515  |
| LmjF23.0660 | <i>L. major</i> | 131 | 667  | 797  |
| LmjF23.0660 | <i>L. major</i> | 54  | 803  | 856  |
| LmjF23.0680 | <i>L. major</i> | 115 | 1    | 115  |
| LmjF23.0680 | <i>L. major</i> | 65  | 468  | 532  |
| LmjF23.0710 | <i>L. major</i> | 50  | 1    | 50   |
| LmjF23.0720 | <i>L. major</i> | 55  | 1    | 55   |
| LmjF23.0720 | <i>L. major</i> | 72  | 135  | 206  |

|             |                 |     |      |      |
|-------------|-----------------|-----|------|------|
| LmjF23.0720 | <i>L. major</i> | 280 | 286  | 565  |
| LmjF23.0730 | <i>L. major</i> | 49  | 1    | 49   |
| LmjF23.0730 | <i>L. major</i> | 73  | 56   | 128  |
| LmjF23.0730 | <i>L. major</i> | 273 | 205  | 477  |
| LmjF23.0730 | <i>L. major</i> | 107 | 493  | 599  |
| LmjF23.0740 | <i>L. major</i> | 47  | 1    | 47   |
| LmjF23.0740 | <i>L. major</i> | 61  | 124  | 184  |
| LmjF23.0740 | <i>L. major</i> | 59  | 255  | 313  |
| LmjF23.0750 | <i>L. major</i> | 41  | 88   | 128  |
| LmjF23.0750 | <i>L. major</i> | 121 | 285  | 405  |
| LmjF23.0750 | <i>L. major</i> | 57  | 453  | 509  |
| LmjF23.0750 | <i>L. major</i> | 66  | 866  | 931  |
| LmjF23.0770 | <i>L. major</i> | 308 | 13   | 320  |
| LmjF23.0770 | <i>L. major</i> | 210 | 325  | 534  |
| LmjF23.0770 | <i>L. major</i> | 204 | 573  | 776  |
| LmjF23.0770 | <i>L. major</i> | 57  | 786  | 842  |
| LmjF23.0770 | <i>L. major</i> | 130 | 973  | 1102 |
| LmjF23.0770 | <i>L. major</i> | 57  | 1258 | 1314 |
| LmjF23.0780 | <i>L. major</i> | 167 | 92   | 258  |
| LmjF23.0780 | <i>L. major</i> | 76  | 534  | 609  |
| LmjF23.0780 | <i>L. major</i> | 55  | 613  | 667  |
| LmjF23.0780 | <i>L. major</i> | 168 | 705  | 872  |
| LmjF23.0790 | <i>L. major</i> | 77  | 51   | 127  |
| LmjF23.0790 | <i>L. major</i> | 122 | 165  | 286  |
| LmjF23.0790 | <i>L. major</i> | 75  | 397  | 471  |
| LmjF23.0790 | <i>L. major</i> | 76  | 495  | 570  |
| LmjF23.0790 | <i>L. major</i> | 105 | 752  | 856  |
| LmjF23.0800 | <i>L. major</i> | 89  | 1    | 89   |
| LmjF23.0820 | <i>L. major</i> | 117 | 116  | 232  |
| LmjF23.0830 | <i>L. major</i> | 114 | 560  | 673  |
| LmjF23.0830 | <i>L. major</i> | 128 | 1091 | 1218 |
| LmjF23.0850 | <i>L. major</i> | 67  | 95   | 161  |
| LmjF23.0850 | <i>L. major</i> | 82  | 245  | 326  |
| LmjF23.0850 | <i>L. major</i> | 110 | 469  | 578  |
| LmjF23.0850 | <i>L. major</i> | 100 | 677  | 776  |
| LmjF23.0900 | <i>L. major</i> | 64  | 1    | 64   |
| LmjF23.0900 | <i>L. major</i> | 161 | 130  | 290  |
| LmjF23.0900 | <i>L. major</i> | 109 | 410  | 518  |
| LmjF23.0900 | <i>L. major</i> | 468 | 642  | 1109 |
| LmjF23.0900 | <i>L. major</i> | 209 | 1117 | 1325 |
| LmjF23.0900 | <i>L. major</i> | 111 | 1362 | 1472 |
| LmjF23.0900 | <i>L. major</i> | 73  | 1486 | 1558 |
| LmjF23.0900 | <i>L. major</i> | 68  | 1586 | 1653 |
| LmjF23.0900 | <i>L. major</i> | 69  | 1703 | 1771 |
| LmjF23.0900 | <i>L. major</i> | 107 | 1942 | 2048 |
| LmjF23.0900 | <i>L. major</i> | 64  | 2081 | 2144 |
| LmjF23.0900 | <i>L. major</i> | 71  | 2218 | 2288 |

|             |                 |     |      |      |
|-------------|-----------------|-----|------|------|
| LmjF23.0900 | <i>L. major</i> | 78  | 2485 | 2562 |
| LmjF23.0900 | <i>L. major</i> | 166 | 2566 | 2731 |
| LmjF23.0900 | <i>L. major</i> | 105 | 2772 | 2876 |
| LmjF23.0910 | <i>L. major</i> | 113 | 57   | 169  |
| LmjF23.0910 | <i>L. major</i> | 56  | 301  | 356  |
| LmjF23.0910 | <i>L. major</i> | 117 | 369  | 485  |
| LmjF23.0910 | <i>L. major</i> | 63  | 853  | 915  |
| LmjF23.0910 | <i>L. major</i> | 127 | 1024 | 1150 |
| LmjF23.0910 | <i>L. major</i> | 116 | 1154 | 1269 |
| LmjF23.0950 | <i>L. major</i> | 52  | 182  | 233  |
| LmjF23.0960 | <i>L. major</i> | 118 | 208  | 325  |
| LmjF23.0970 | <i>L. major</i> | 122 | 99   | 220  |
| LmjF23.0970 | <i>L. major</i> | 91  | 298  | 388  |
| LmjF23.0980 | <i>L. major</i> | 68  | 1    | 68   |
| LmjF23.0980 | <i>L. major</i> | 57  | 189  | 245  |
| LmjF23.0990 | <i>L. major</i> | 60  | 138  | 197  |
| LmjF23.0990 | <i>L. major</i> | 143 | 280  | 422  |
| LmjF23.0990 | <i>L. major</i> | 225 | 454  | 678  |
| LmjF23.0990 | <i>L. major</i> | 70  | 680  | 749  |
| LmjF23.1000 | <i>L. major</i> | 50  | 51   | 100  |
| LmjF23.1000 | <i>L. major</i> | 68  | 116  | 183  |
| LmjF23.1000 | <i>L. major</i> | 68  | 116  | 183  |
| LmjF23.1010 | <i>L. major</i> | 43  | 77   | 119  |
| LmjF23.1010 | <i>L. major</i> | 59  | 219  | 277  |
| LmjF23.1010 | <i>L. major</i> | 50  | 309  | 358  |
| LmjF23.1010 | <i>L. major</i> | 44  | 513  | 556  |
| LmjF23.1010 | <i>L. major</i> | 46  | 626  | 671  |
| LmjF23.1010 | <i>L. major</i> | 41  | 757  | 797  |
| LmjF23.1010 | <i>L. major</i> | 309 | 802  | 1110 |
| LmjF23.1020 | <i>L. major</i> | 150 | 1    | 150  |
| LmjF23.1025 | <i>L. major</i> | 46  | 217  | 262  |
| LmjF23.1025 | <i>L. major</i> | 232 | 326  | 557  |
| LmjF23.1035 | <i>L. major</i> | 112 | 9    | 120  |
| LmjF23.1035 | <i>L. major</i> | 78  | 133  | 210  |
| LmjF23.1035 | <i>L. major</i> | 180 | 233  | 412  |
| LmjF23.1035 | <i>L. major</i> | 81  | 421  | 501  |
| LmjF23.1035 | <i>L. major</i> | 44  | 534  | 577  |
| LmjF23.1045 | <i>L. major</i> | 42  | 262  | 303  |
| LmjF23.1055 | <i>L. major</i> | 50  | 1    | 50   |
| LmjF23.1055 | <i>L. major</i> | 58  | 94   | 151  |
| LmjF23.1055 | <i>L. major</i> | 56  | 296  | 351  |
| LmjF23.1060 | <i>L. major</i> | 177 | 1    | 177  |
| LmjF23.1065 | <i>L. major</i> | 153 | 270  | 422  |
| LmjF23.1070 | <i>L. major</i> | 177 | 1    | 177  |
| LmjF23.1090 | <i>L. major</i> | 51  | 1    | 51   |
| LmjF23.1090 | <i>L. major</i> | 75  | 135  | 209  |
| LmjF23.1090 | <i>L. major</i> | 47  | 231  | 277  |



|             |                 |     |      |      |
|-------------|-----------------|-----|------|------|
| LmjF23.1090 | <i>L. major</i> | 49  | 312  | 360  |
| LmjF23.1090 | <i>L. major</i> | 45  | 488  | 532  |
| LmjF23.1100 | <i>L. major</i> | 40  | 251  | 290  |
| LmjF23.1110 | <i>L. major</i> | 61  | 518  | 578  |
| LmjF23.1120 | <i>L. major</i> | 88  | 250  | 337  |
| LmjF23.1130 | <i>L. major</i> | 138 | 177  | 314  |
| LmjF23.1130 | <i>L. major</i> | 72  | 338  | 409  |
| LmjF23.1140 | <i>L. major</i> | 169 | 22   | 190  |
| LmjF23.1140 | <i>L. major</i> | 208 | 204  | 411  |
| LmjF23.1140 | <i>L. major</i> | 143 | 413  | 555  |
| LmjF23.1140 | <i>L. major</i> | 52  | 644  | 695  |
| LmjF23.1140 | <i>L. major</i> | 107 | 755  | 861  |
| LmjF23.1140 | <i>L. major</i> | 469 | 881  | 1349 |
| LmjF23.1150 | <i>L. major</i> | 142 | 13   | 154  |
| LmjF23.1150 | <i>L. major</i> | 273 | 178  | 450  |
| LmjF23.1150 | <i>L. major</i> | 46  | 502  | 547  |
| LmjF23.1150 | <i>L. major</i> | 43  | 566  | 608  |
| LmjF23.1155 | <i>L. major</i> | 82  | 31   | 112  |
| LmjF23.1155 | <i>L. major</i> | 44  | 121  | 164  |
| LmjF23.1155 | <i>L. major</i> | 137 | 238  | 374  |
| LmjF23.1155 | <i>L. major</i> | 55  | 391  | 445  |
| LmjF23.1165 | <i>L. major</i> | 141 | 361  | 501  |
| LmjF23.1200 | <i>L. major</i> | 74  | 47   | 120  |
| LmjF23.1200 | <i>L. major</i> | 42  | 199  | 240  |
| LmjF23.1240 | <i>L. major</i> | 141 | 58   | 198  |
| LmjF23.1240 | <i>L. major</i> | 40  | 262  | 301  |
| LmjF23.1240 | <i>L. major</i> | 46  | 309  | 354  |
| LmjF23.1240 | <i>L. major</i> | 269 | 450  | 718  |
| LmjF23.1250 | <i>L. major</i> | 192 | 1    | 192  |
| LmjF23.1250 | <i>L. major</i> | 203 | 233  | 435  |
| LmjF23.1250 | <i>L. major</i> | 52  | 558  | 609  |
| LmjF23.1250 | <i>L. major</i> | 44  | 646  | 689  |
| LmjF23.1250 | <i>L. major</i> | 40  | 817  | 856  |
| LmjF23.1250 | <i>L. major</i> | 192 | 932  | 1123 |
| LmjF23.1250 | <i>L. major</i> | 82  | 1271 | 1352 |
| LmjF23.1260 | <i>L. major</i> | 56  | 105  | 160  |
| LmjF23.1260 | <i>L. major</i> | 40  | 1019 | 1058 |
| LmjF23.1260 | <i>L. major</i> | 134 | 1121 | 1254 |
| LmjF23.1260 | <i>L. major</i> | 41  | 1256 | 1296 |
| LmjF23.1263 | <i>L. major</i> | 269 | 1    | 269  |
| LmjF23.1267 | <i>L. major</i> | 300 | 83   | 382  |
| LmjF23.1270 | <i>L. major</i> | 77  | 283  | 359  |
| LmjF23.1270 | <i>L. major</i> | 300 | 528  | 827  |
| LmjF23.1270 | <i>L. major</i> | 182 | 832  | 1013 |
| LmjF23.1280 | <i>L. major</i> | 103 | 1    | 103  |
| LmjF23.1280 | <i>L. major</i> | 218 | 404  | 621  |
| LmjF23.1280 | <i>L. major</i> | 87  | 653  | 739  |

|             |                 |     |      |      |
|-------------|-----------------|-----|------|------|
| LmjF23.1280 | <i>L. major</i> | 43  | 764  | 806  |
| LmjF23.1280 | <i>L. major</i> | 54  | 930  | 983  |
| LmjF23.1280 | <i>L. major</i> | 43  | 1028 | 1070 |
| LmjF23.1290 | <i>L. major</i> | 351 | 1    | 351  |
| LmjF23.1290 | <i>L. major</i> | 243 | 353  | 595  |
| LmjF23.1290 | <i>L. major</i> | 46  | 611  | 656  |
| LmjF23.1310 | <i>L. major</i> | 71  | 79   | 149  |
| LmjF23.1310 | <i>L. major</i> | 108 | 3314 | 3421 |
| LmjF23.1310 | <i>L. major</i> | 59  | 3527 | 3585 |
| LmjF23.1310 | <i>L. major</i> | 75  | 3824 | 3898 |
| LmjF23.1330 | <i>L. major</i> | 125 | 62   | 186  |
| LmjF23.1330 | <i>L. major</i> | 116 | 346  | 461  |
| LmjF23.1330 | <i>L. major</i> | 89  | 553  | 641  |
| LmjF23.1330 | <i>L. major</i> | 329 | 663  | 991  |
| LmjF23.1330 | <i>L. major</i> | 202 | 1249 | 1450 |
| LmjF23.1330 | <i>L. major</i> | 204 | 1468 | 1671 |
| LmjF23.1330 | <i>L. major</i> | 64  | 1706 | 1769 |
| LmjF23.1330 | <i>L. major</i> | 203 | 1918 | 2120 |
| LmjF23.1330 | <i>L. major</i> | 157 | 2726 | 2882 |
| LmjF23.1330 | <i>L. major</i> | 53  | 2933 | 2985 |
| LmjF23.1340 | <i>L. major</i> | 51  | 38   | 88   |
| LmjF23.1340 | <i>L. major</i> | 60  | 139  | 198  |
| LmjF23.1350 | <i>L. major</i> | 164 | 1    | 164  |
| LmjF23.1360 | <i>L. major</i> | 82  | 1    | 82   |
| LmjF23.1360 | <i>L. major</i> | 155 | 261  | 415  |
| LmjF23.1370 | <i>L. major</i> | 52  | 1    | 52   |
| LmjF23.1380 | <i>L. major</i> | 661 | 1    | 661  |
| LmjF23.1380 | <i>L. major</i> | 183 | 663  | 845  |
| LmjF23.1380 | <i>L. major</i> | 45  | 1030 | 1074 |
| LmjF23.1380 | <i>L. major</i> | 86  | 1417 | 1502 |
| LmjF23.1380 | <i>L. major</i> | 88  | 1522 | 1609 |
| LmjF23.1380 | <i>L. major</i> | 58  | 1808 | 1865 |
| LmjF23.1405 | <i>L. major</i> | 45  | 286  | 330  |
| LmjF23.1430 | <i>L. major</i> | 75  | 93   | 167  |
| LmjF23.1430 | <i>L. major</i> | 75  | 376  | 450  |
| LmjF23.1430 | <i>L. major</i> | 75  | 376  | 450  |
| LmjF23.1450 | <i>L. major</i> | 52  | 1    | 52   |
| LmjF23.1450 | <i>L. major</i> | 420 | 71   | 490  |
| LmjF23.1450 | <i>L. major</i> | 420 | 71   | 490  |
| LmjF23.1470 | <i>L. major</i> | 73  | 148  | 220  |
| LmjF23.1500 | <i>L. major</i> | 42  | 259  | 300  |
| LmjF23.1510 | <i>L. major</i> | 46  | 61   | 106  |
| LmjF23.1520 | <i>L. major</i> | 44  | 77   | 120  |
| LmjF23.1530 | <i>L. major</i> | 67  | 107  | 173  |
| LmjF23.1550 | <i>L. major</i> | 41  | 1    | 41   |
| LmjF23.1560 | <i>L. major</i> | 66  | 63   | 128  |
| LmjF23.1590 | <i>L. major</i> | 43  | 231  | 273  |

|             |                 |     |      |      |
|-------------|-----------------|-----|------|------|
| LmjF23.1610 | <i>L. major</i> | 43  | 1    | 43   |
| LmjF23.1610 | <i>L. major</i> | 226 | 126  | 351  |
| LmjF23.1620 | <i>L. major</i> | 118 | 94   | 211  |
| LmjF23.1630 | <i>L. major</i> | 110 | 159  | 268  |
| LmjF23.1640 | <i>L. major</i> | 46  | 111  | 156  |
| LmjF23.1640 | <i>L. major</i> | 95  | 177  | 271  |
| LmjF23.1640 | <i>L. major</i> | 196 | 286  | 481  |
| LmjF23.1640 | <i>L. major</i> | 42  | 545  | 586  |
| LmjF23.1640 | <i>L. major</i> | 44  | 601  | 644  |
| LmjF23.1640 | <i>L. major</i> | 43  | 691  | 733  |
| LmjF23.1640 | <i>L. major</i> | 75  | 812  | 886  |
| LmjF23.1640 | <i>L. major</i> | 132 | 946  | 1077 |
| LmjF23.1640 | <i>L. major</i> | 71  | 1102 | 1172 |
| LmjF23.1640 | <i>L. major</i> | 56  | 1536 | 1591 |
| LmjF23.1640 | <i>L. major</i> | 48  | 1593 | 1640 |
| LmjF23.1640 | <i>L. major</i> | 61  | 1722 | 1782 |
| LmjF23.1640 | <i>L. major</i> | 114 | 2104 | 2217 |
| LmjF23.1640 | <i>L. major</i> | 137 | 2227 | 2363 |
| LmjF23.1640 | <i>L. major</i> | 970 | 2371 | 3340 |
| LmjF23.1660 | <i>L. major</i> | 57  | 210  | 266  |
| LmjF23.1670 | <i>L. major</i> | 221 | 148  | 368  |
| LmjF23.1670 | <i>L. major</i> | 76  | 561  | 636  |
| LmjF23.1680 | <i>L. major</i> | 114 | 1    | 114  |
| LmjF23.1680 | <i>L. major</i> | 203 | 133  | 335  |
| LmjF23.1690 | <i>L. major</i> | 63  | 1    | 63   |
| LmjF23.1710 | <i>L. major</i> | 96  | 69   | 164  |
| LmjF23.1710 | <i>L. major</i> | 53  | 201  | 253  |
| LmjF23.1710 | <i>L. major</i> | 90  | 382  | 471  |
| LmjF23.1715 | <i>L. major</i> | 57  | 74   | 130  |
| LmjF23.1720 | <i>L. major</i> | 42  | 97   | 138  |
| LmjF23.1730 | <i>L. major</i> | 97  | 1    | 97   |
| LmjF23.1730 | <i>L. major</i> | 149 | 108  | 256  |
| LmjF23.1730 | <i>L. major</i> | 46  | 315  | 360  |
| LmjF23.1740 | <i>L. major</i> | 50  | 27   | 76   |
| LmjF23.1740 | <i>L. major</i> | 81  | 128  | 208  |
| LmjF23.1740 | <i>L. major</i> | 81  | 128  | 208  |
| LmjF23.1750 | <i>L. major</i> | 44  | 1    | 44   |
| LmjF23.1750 | <i>L. major</i> | 76  | 128  | 203  |
| LmjF23.1750 | <i>L. major</i> | 76  | 128  | 203  |
| LmjF23.1760 | <i>L. major</i> | 91  | 1    | 91   |
| LmjF23.1760 | <i>L. major</i> | 131 | 134  | 264  |
| LmjF23.1760 | <i>L. major</i> | 58  | 346  | 403  |
| LmjF23.1760 | <i>L. major</i> | 90  | 409  | 498  |
| LmjF23.1760 | <i>L. major</i> | 46  | 544  | 589  |
| LmjF24.0010 | <i>L. major</i> | 43  | 69   | 111  |
| LmjF24.0020 | <i>L. major</i> | 202 | 282  | 483  |
| LmjF24.0030 | <i>L. major</i> | 49  | 118  | 166  |

|             |                 |     |      |      |
|-------------|-----------------|-----|------|------|
| LmjF24.0050 | <i>L. major</i> | 57  | 55   | 111  |
| LmjF24.0060 | <i>L. major</i> | 56  | 359  | 414  |
| LmjF24.0070 | <i>L. major</i> | 92  | 204  | 295  |
| LmjF24.0070 | <i>L. major</i> | 53  | 387  | 439  |
| LmjF24.0100 | <i>L. major</i> | 211 | 12   | 222  |
| LmjF24.0140 | <i>L. major</i> | 55  | 236  | 290  |
| LmjF24.0160 | <i>L. major</i> | 136 | 1    | 136  |
| LmjF24.0160 | <i>L. major</i> | 44  | 143  | 186  |
| LmjF24.0160 | <i>L. major</i> | 42  | 237  | 278  |
| LmjF24.0190 | <i>L. major</i> | 112 | 1    | 112  |
| LmjF24.0190 | <i>L. major</i> | 137 | 677  | 813  |
| LmjF24.0200 | <i>L. major</i> | 100 | 1    | 100  |
| LmjF24.0200 | <i>L. major</i> | 55  | 123  | 177  |
| LmjF24.0200 | <i>L. major</i> | 51  | 255  | 305  |
| LmjF24.0210 | <i>L. major</i> | 169 | 1    | 169  |
| LmjF24.0210 | <i>L. major</i> | 67  | 250  | 316  |
| LmjF24.0220 | <i>L. major</i> | 67  | 117  | 183  |
| LmjF24.0230 | <i>L. major</i> | 77  | 1    | 77   |
| LmjF24.0230 | <i>L. major</i> | 40  | 335  | 374  |
| LmjF24.0240 | <i>L. major</i> | 50  | 175  | 224  |
| LmjF24.0250 | <i>L. major</i> | 51  | 347  | 397  |
| LmjF24.0250 | <i>L. major</i> | 43  | 501  | 543  |
| LmjF24.0250 | <i>L. major</i> | 46  | 560  | 605  |
| LmjF24.0260 | <i>L. major</i> | 79  | 38   | 116  |
| LmjF24.0260 | <i>L. major</i> | 55  | 240  | 294  |
| LmjF24.0260 | <i>L. major</i> | 41  | 786  | 826  |
| LmjF24.0260 | <i>L. major</i> | 63  | 1295 | 1357 |
| LmjF24.0260 | <i>L. major</i> | 45  | 1594 | 1638 |
| LmjF24.0270 | <i>L. major</i> | 222 | 65   | 286  |
| LmjF24.0270 | <i>L. major</i> | 108 | 352  | 459  |
| LmjF24.0270 | <i>L. major</i> | 77  | 752  | 828  |
| LmjF24.0270 | <i>L. major</i> | 215 | 881  | 1095 |
| LmjF24.0280 | <i>L. major</i> | 73  | 106  | 178  |
| LmjF24.0280 | <i>L. major</i> | 53  | 186  | 238  |
| LmjF24.0280 | <i>L. major</i> | 53  | 186  | 238  |
| LmjF24.0300 | <i>L. major</i> | 54  | 485  | 538  |
| LmjF24.0300 | <i>L. major</i> | 98  | 693  | 790  |
| LmjF24.0310 | <i>L. major</i> | 108 | 1    | 108  |
| LmjF24.0310 | <i>L. major</i> | 62  | 121  | 182  |
| LmjF24.0320 | <i>L. major</i> | 49  | 409  | 457  |
| LmjF24.0330 | <i>L. major</i> | 89  | 1    | 89   |
| LmjF24.0330 | <i>L. major</i> | 57  | 170  | 226  |
| LmjF24.0330 | <i>L. major</i> | 60  | 329  | 388  |
| LmjF24.0330 | <i>L. major</i> | 90  | 393  | 482  |
| LmjF24.0330 | <i>L. major</i> | 97  | 658  | 754  |
| LmjF24.0330 | <i>L. major</i> | 126 | 915  | 1040 |
| LmjF24.0350 | <i>L. major</i> | 67  | 197  | 263  |

|             |                 |     |      |      |
|-------------|-----------------|-----|------|------|
| LmjF24.0360 | <i>L. major</i> | 123 | 29   | 151  |
| LmjF24.0380 | <i>L. major</i> | 75  | 1    | 75   |
| LmjF24.0380 | <i>L. major</i> | 130 | 302  | 431  |
| LmjF24.0380 | <i>L. major</i> | 524 | 484  | 1007 |
| LmjF24.0390 | <i>L. major</i> | 46  | 231  | 276  |
| LmjF24.0390 | <i>L. major</i> | 76  | 297  | 372  |
| LmjF24.0390 | <i>L. major</i> | 41  | 485  | 525  |
| LmjF24.0410 | <i>L. major</i> | 267 | 95   | 361  |
| LmjF24.0430 | <i>L. major</i> | 95  | 45   | 139  |
| LmjF24.0430 | <i>L. major</i> | 147 | 162  | 308  |
| LmjF24.0430 | <i>L. major</i> | 48  | 613  | 660  |
| LmjF24.0430 | <i>L. major</i> | 52  | 1152 | 1203 |
| LmjF24.0440 | <i>L. major</i> | 86  | 134  | 219  |
| LmjF24.0440 | <i>L. major</i> | 46  | 423  | 468  |
| LmjF24.0440 | <i>L. major</i> | 80  | 689  | 768  |
| LmjF24.0440 | <i>L. major</i> | 40  | 1281 | 1320 |
| LmjF24.0450 | <i>L. major</i> | 86  | 129  | 214  |
| LmjF24.0450 | <i>L. major</i> | 46  | 418  | 463  |
| LmjF24.0450 | <i>L. major</i> | 83  | 681  | 763  |
| LmjF24.0470 | <i>L. major</i> | 232 | 189  | 420  |
| LmjF24.0480 | <i>L. major</i> | 103 | 1    | 103  |
| LmjF24.0480 | <i>L. major</i> | 75  | 143  | 217  |
| LmjF24.0480 | <i>L. major</i> | 136 | 272  | 407  |
| LmjF24.0480 | <i>L. major</i> | 233 | 711  | 943  |
| LmjF24.0480 | <i>L. major</i> | 233 | 957  | 1189 |
| LmjF24.0490 | <i>L. major</i> | 77  | 1    | 77   |
| LmjF24.0490 | <i>L. major</i> | 63  | 141  | 203  |
| LmjF24.0490 | <i>L. major</i> | 61  | 888  | 948  |
| LmjF24.0490 | <i>L. major</i> | 76  | 970  | 1045 |
| LmjF24.0490 | <i>L. major</i> | 68  | 1265 | 1332 |
| LmjF24.0490 | <i>L. major</i> | 51  | 1626 | 1676 |
| LmjF24.0490 | <i>L. major</i> | 67  | 1872 | 1938 |
| LmjF24.0500 | <i>L. major</i> | 89  | 1    | 89   |
| LmjF24.0500 | <i>L. major</i> | 136 | 99   | 234  |
| LmjF24.0510 | <i>L. major</i> | 132 | 1    | 132  |
| LmjF24.0510 | <i>L. major</i> | 53  | 423  | 475  |
| LmjF24.0510 | <i>L. major</i> | 110 | 508  | 617  |
| LmjF24.0520 | <i>L. major</i> | 57  | 624  | 680  |
| LmjF24.0530 | <i>L. major</i> | 83  | 81   | 163  |
| LmjF24.0530 | <i>L. major</i> | 60  | 168  | 227  |
| LmjF24.0530 | <i>L. major</i> | 60  | 168  | 227  |
| LmjF24.0540 | <i>L. major</i> | 63  | 341  | 403  |
| LmjF24.0550 | <i>L. major</i> | 77  | 30   | 106  |
| LmjF24.0552 | <i>L. major</i> | 50  | 81   | 130  |
| LmjF24.0600 | <i>L. major</i> | 68  | 820  | 887  |
| LmjF24.0600 | <i>L. major</i> | 41  | 1060 | 1100 |
| LmjF24.0600 | <i>L. major</i> | 41  | 1189 | 1229 |

|             |                 |     |      |      |
|-------------|-----------------|-----|------|------|
| LmjF24.0600 | <i>L. major</i> | 85  | 1705 | 1789 |
| LmjF24.0610 | <i>L. major</i> | 58  | 385  | 442  |
| LmjF24.0610 | <i>L. major</i> | 322 | 627  | 948  |
| LmjF24.0610 | <i>L. major</i> | 70  | 960  | 1029 |
| LmjF24.0620 | <i>L. major</i> | 56  | 45   | 100  |
| LmjF24.0620 | <i>L. major</i> | 316 | 494  | 809  |
| LmjF24.0640 | <i>L. major</i> | 114 | 322  | 435  |
| LmjF24.0640 | <i>L. major</i> | 41  | 437  | 477  |
| LmjF24.0650 | <i>L. major</i> | 758 | 213  | 970  |
| LmjF24.0670 | <i>L. major</i> | 47  | 114  | 160  |
| LmjF24.0670 | <i>L. major</i> | 409 | 333  | 741  |
| LmjF24.0670 | <i>L. major</i> | 156 | 808  | 963  |
| LmjF24.0670 | <i>L. major</i> | 160 | 1004 | 1163 |
| LmjF24.0680 | <i>L. major</i> | 55  | 493  | 547  |
| LmjF24.0690 | <i>L. major</i> | 65  | 110  | 174  |
| LmjF24.0700 | <i>L. major</i> | 138 | 1    | 138  |
| LmjF24.0700 | <i>L. major</i> | 77  | 278  | 354  |
| LmjF24.0700 | <i>L. major</i> | 40  | 574  | 613  |
| LmjF24.0710 | <i>L. major</i> | 56  | 49   | 104  |
| LmjF24.0710 | <i>L. major</i> | 61  | 176  | 236  |
| LmjF24.0710 | <i>L. major</i> | 48  | 290  | 337  |
| LmjF24.0730 | <i>L. major</i> | 90  | 430  | 519  |
| LmjF24.0740 | <i>L. major</i> | 88  | 1    | 88   |
| LmjF24.0740 | <i>L. major</i> | 141 | 105  | 245  |
| LmjF24.0740 | <i>L. major</i> | 97  | 272  | 368  |
| LmjF24.0740 | <i>L. major</i> | 266 | 370  | 635  |
| LmjF24.0740 | <i>L. major</i> | 148 | 807  | 954  |
| LmjF24.0740 | <i>L. major</i> | 107 | 968  | 1074 |
| LmjF24.0750 | <i>L. major</i> | 59  | 198  | 256  |
| LmjF24.0760 | <i>L. major</i> | 52  | 1    | 52   |
| LmjF24.0760 | <i>L. major</i> | 51  | 54   | 104  |
| LmjF24.0760 | <i>L. major</i> | 93  | 121  | 213  |
| LmjF24.0760 | <i>L. major</i> | 64  | 310  | 373  |
| LmjF24.0760 | <i>L. major</i> | 52  | 739  | 790  |
| LmjF24.0760 | <i>L. major</i> | 51  | 973  | 1023 |
| LmjF24.0760 | <i>L. major</i> | 66  | 1062 | 1127 |
| LmjF24.0780 | <i>L. major</i> | 93  | 1    | 93   |
| LmjF24.0780 | <i>L. major</i> | 197 | 111  | 307  |
| LmjF24.0790 | <i>L. major</i> | 223 | 1    | 223  |
| LmjF24.0790 | <i>L. major</i> | 81  | 258  | 338  |
| LmjF24.0790 | <i>L. major</i> | 44  | 394  | 437  |
| LmjF24.0800 | <i>L. major</i> | 110 | 1    | 110  |
| LmjF24.0800 | <i>L. major</i> | 132 | 150  | 281  |
| LmjF24.0800 | <i>L. major</i> | 284 | 301  | 584  |
| LmjF24.0810 | <i>L. major</i> | 52  | 1    | 52   |
| LmjF24.0810 | <i>L. major</i> | 50  | 188  | 237  |
| LmjF24.0810 | <i>L. major</i> | 103 | 277  | 379  |

|             |                 |     |      |      |
|-------------|-----------------|-----|------|------|
| LmjF24.0820 | <i>L. major</i> | 54  | 52   | 105  |
| LmjF24.0820 | <i>L. major</i> | 65  | 220  | 284  |
| LmjF24.0820 | <i>L. major</i> | 45  | 322  | 366  |
| LmjF24.0820 | <i>L. major</i> | 130 | 818  | 947  |
| LmjF24.0820 | <i>L. major</i> | 68  | 984  | 1051 |
| LmjF24.0820 | <i>L. major</i> | 90  | 1086 | 1175 |
| LmjF24.0820 | <i>L. major</i> | 104 | 1429 | 1532 |
| LmjF24.0820 | <i>L. major</i> | 101 | 1716 | 1816 |
| LmjF24.0820 | <i>L. major</i> | 41  | 2023 | 2063 |
| LmjF24.0820 | <i>L. major</i> | 50  | 2203 | 2252 |
| LmjF24.0820 | <i>L. major</i> | 102 | 2270 | 2371 |
| LmjF24.0820 | <i>L. major</i> | 99  | 2575 | 2673 |
| LmjF24.0830 | <i>L. major</i> | 62  | 317  | 378  |
| LmjF24.0830 | <i>L. major</i> | 106 | 706  | 811  |
| LmjF24.0830 | <i>L. major</i> | 106 | 706  | 811  |
| LmjF24.0840 | <i>L. major</i> | 60  | 1    | 60   |
| LmjF24.0840 | <i>L. major</i> | 58  | 159  | 216  |
| LmjF24.0840 | <i>L. major</i> | 58  | 159  | 216  |
| LmjF24.0860 | <i>L. major</i> | 40  | 1    | 40   |
| LmjF24.0860 | <i>L. major</i> | 48  | 153  | 200  |
| LmjF24.0860 | <i>L. major</i> | 54  | 235  | 288  |
| LmjF24.0890 | <i>L. major</i> | 190 | 1    | 190  |
| LmjF24.0890 | <i>L. major</i> | 151 | 391  | 541  |
| LmjF24.0890 | <i>L. major</i> | 48  | 825  | 872  |
| LmjF24.0890 | <i>L. major</i> | 81  | 992  | 1072 |
| LmjF24.0900 | <i>L. major</i> | 77  | 26   | 102  |
| LmjF24.0900 | <i>L. major</i> | 633 | 137  | 769  |
| LmjF24.0910 | <i>L. major</i> | 46  | 181  | 226  |
| LmjF24.0910 | <i>L. major</i> | 48  | 556  | 603  |
| LmjF24.0920 | <i>L. major</i> | 89  | 1    | 89   |
| LmjF24.0920 | <i>L. major</i> | 42  | 221  | 262  |
| LmjF24.0920 | <i>L. major</i> | 58  | 398  | 455  |
| LmjF24.0930 | <i>L. major</i> | 42  | 105  | 146  |
| LmjF24.0930 | <i>L. major</i> | 87  | 515  | 601  |
| LmjF24.0930 | <i>L. major</i> | 65  | 638  | 702  |
| LmjF24.0950 | <i>L. major</i> | 97  | 71   | 167  |
| LmjF24.0960 | <i>L. major</i> | 103 | 1    | 103  |
| LmjF24.0960 | <i>L. major</i> | 82  | 200  | 281  |
| LmjF24.0960 | <i>L. major</i> | 692 | 291  | 982  |
| LmjF24.0970 | <i>L. major</i> | 45  | 54   | 98   |
| LmjF24.0970 | <i>L. major</i> | 50  | 275  | 324  |
| LmjF24.0970 | <i>L. major</i> | 59  | 583  | 641  |
| LmjF24.0980 | <i>L. major</i> | 282 | 45   | 326  |
| LmjF24.0980 | <i>L. major</i> | 949 | 332  | 1280 |
| LmjF24.0980 | <i>L. major</i> | 62  | 1292 | 1353 |
| LmjF24.0980 | <i>L. major</i> | 216 | 1373 | 1588 |
| LmjF24.0990 | <i>L. major</i> | 170 | 492  | 661  |

|             |                 |     |      |      |
|-------------|-----------------|-----|------|------|
| LmjF24.1000 | <i>L. major</i> | 318 | 1    | 318  |
| LmjF24.1000 | <i>L. major</i> | 167 | 343  | 509  |
| LmjF24.1010 | <i>L. major</i> | 65  | 84   | 148  |
| LmjF24.1010 | <i>L. major</i> | 81  | 159  | 239  |
| LmjF24.1010 | <i>L. major</i> | 135 | 293  | 427  |
| LmjF24.1020 | <i>L. major</i> | 73  | 115  | 187  |
| LmjF24.1020 | <i>L. major</i> | 82  | 329  | 410  |
| LmjF24.1020 | <i>L. major</i> | 55  | 450  | 504  |
| LmjF24.1020 | <i>L. major</i> | 175 | 569  | 743  |
| LmjF24.1020 | <i>L. major</i> | 73  | 853  | 925  |
| LmjF24.1020 | <i>L. major</i> | 53  | 927  | 979  |
| LmjF24.1040 | <i>L. major</i> | 69  | 39   | 107  |
| LmjF24.1040 | <i>L. major</i> | 124 | 110  | 233  |
| LmjF24.1040 | <i>L. major</i> | 128 | 329  | 456  |
| LmjF24.1040 | <i>L. major</i> | 114 | 590  | 703  |
| LmjF24.1040 | <i>L. major</i> | 110 | 771  | 880  |
| LmjF24.1050 | <i>L. major</i> | 179 | 1    | 179  |
| LmjF24.1050 | <i>L. major</i> | 67  | 396  | 462  |
| LmjF24.1050 | <i>L. major</i> | 139 | 635  | 773  |
| LmjF24.1050 | <i>L. major</i> | 63  | 1043 | 1105 |
| LmjF24.1050 | <i>L. major</i> | 86  | 1189 | 1274 |
| LmjF24.1060 | <i>L. major</i> | 73  | 1    | 73   |
| LmjF24.1060 | <i>L. major</i> | 96  | 222  | 317  |
| LmjF24.1070 | <i>L. major</i> | 83  | 1    | 83   |
| LmjF24.1070 | <i>L. major</i> | 52  | 256  | 307  |
| LmjF24.1070 | <i>L. major</i> | 79  | 349  | 427  |
| LmjF24.1070 | <i>L. major</i> | 163 | 625  | 787  |
| LmjF24.1070 | <i>L. major</i> | 178 | 1476 | 1653 |
| LmjF24.1070 | <i>L. major</i> | 95  | 1682 | 1776 |
| LmjF24.1070 | <i>L. major</i> | 137 | 2085 | 2221 |
| LmjF24.1070 | <i>L. major</i> | 77  | 2396 | 2472 |
| LmjF24.1070 | <i>L. major</i> | 53  | 2475 | 2527 |
| LmjF24.1080 | <i>L. major</i> | 85  | 298  | 382  |
| LmjF24.1090 | <i>L. major</i> | 62  | 255  | 316  |
| LmjF24.1090 | <i>L. major</i> | 41  | 478  | 518  |
| LmjF24.1090 | <i>L. major</i> | 41  | 478  | 518  |
| LmjF24.1100 | <i>L. major</i> | 95  | 1    | 95   |
| LmjF24.1100 | <i>L. major</i> | 123 | 102  | 224  |
| LmjF24.1100 | <i>L. major</i> | 182 | 249  | 430  |
| LmjF24.1100 | <i>L. major</i> | 80  | 1059 | 1138 |
| LmjF24.1110 | <i>L. major</i> | 67  | 304  | 370  |
| LmjF24.1110 | <i>L. major</i> | 305 | 419  | 723  |
| LmjF24.1110 | <i>L. major</i> | 58  | 966  | 1023 |
| LmjF24.1110 | <i>L. major</i> | 56  | 1138 | 1193 |
| LmjF24.1120 | <i>L. major</i> | 59  | 1    | 59   |
| LmjF24.1120 | <i>L. major</i> | 42  | 184  | 225  |
| LmjF24.1120 | <i>L. major</i> | 70  | 251  | 320  |



|             |                 |     |      |      |
|-------------|-----------------|-----|------|------|
| LmjF24.1120 | <i>L. major</i> | 107 | 322  | 428  |
| LmjF24.1120 | <i>L. major</i> | 101 | 513  | 613  |
| LmjF24.1120 | <i>L. major</i> | 124 | 789  | 912  |
| LmjF24.1125 | <i>L. major</i> | 224 | 1    | 224  |
| LmjF24.1125 | <i>L. major</i> | 147 | 248  | 394  |
| LmjF24.1125 | <i>L. major</i> | 44  | 607  | 650  |
| LmjF24.1130 | <i>L. major</i> | 318 | 33   | 350  |
| LmjF24.1130 | <i>L. major</i> | 218 | 391  | 608  |
| LmjF24.1130 | <i>L. major</i> | 101 | 617  | 717  |
| LmjF24.1130 | <i>L. major</i> | 131 | 744  | 874  |
| LmjF24.1130 | <i>L. major</i> | 101 | 886  | 986  |
| LmjF24.1140 | <i>L. major</i> | 76  | 70   | 145  |
| LmjF24.1140 | <i>L. major</i> | 41  | 153  | 193  |
| LmjF24.1140 | <i>L. major</i> | 42  | 266  | 307  |
| LmjF24.1140 | <i>L. major</i> | 63  | 487  | 549  |
| LmjF24.1150 | <i>L. major</i> | 69  | 1    | 69   |
| LmjF24.1150 | <i>L. major</i> | 255 | 97   | 351  |
| LmjF24.1160 | <i>L. major</i> | 142 | 1    | 142  |
| LmjF24.1160 | <i>L. major</i> | 124 | 157  | 280  |
| LmjF24.1160 | <i>L. major</i> | 173 | 342  | 514  |
| LmjF24.1160 | <i>L. major</i> | 113 | 522  | 634  |
| LmjF24.1160 | <i>L. major</i> | 383 | 665  | 1047 |
| LmjF24.1170 | <i>L. major</i> | 42  | 132  | 173  |
| LmjF24.1170 | <i>L. major</i> | 41  | 226  | 266  |
| LmjF24.1170 | <i>L. major</i> | 40  | 602  | 641  |
| LmjF24.1170 | <i>L. major</i> | 72  | 1068 | 1139 |
| LmjF24.1170 | <i>L. major</i> | 61  | 1190 | 1250 |
| LmjF24.1180 | <i>L. major</i> | 69  | 1    | 69   |
| LmjF24.1180 | <i>L. major</i> | 168 | 85   | 252  |
| LmjF24.1190 | <i>L. major</i> | 104 | 1    | 104  |
| LmjF24.1200 | <i>L. major</i> | 276 | 1    | 276  |
| LmjF24.1220 | <i>L. major</i> | 109 | 24   | 132  |
| LmjF24.1220 | <i>L. major</i> | 105 | 173  | 277  |
| LmjF24.1220 | <i>L. major</i> | 50  | 388  | 437  |
| LmjF24.1220 | <i>L. major</i> | 74  | 470  | 543  |
| LmjF24.1230 | <i>L. major</i> | 232 | 1    | 232  |
| LmjF24.1230 | <i>L. major</i> | 78  | 277  | 354  |
| LmjF24.1230 | <i>L. major</i> | 77  | 357  | 433  |
| LmjF24.1230 | <i>L. major</i> | 85  | 678  | 762  |
| LmjF24.1240 | <i>L. major</i> | 52  | 53   | 104  |
| LmjF24.1240 | <i>L. major</i> | 46  | 205  | 250  |
| LmjF24.1240 | <i>L. major</i> | 46  | 205  | 250  |
| LmjF24.1290 | <i>L. major</i> | 86  | 1    | 86   |
| LmjF24.1290 | <i>L. major</i> | 89  | 142  | 230  |
| LmjF24.1290 | <i>L. major</i> | 95  | 326  | 420  |
| LmjF24.1290 | <i>L. major</i> | 106 | 1119 | 1224 |
| LmjF24.1290 | <i>L. major</i> | 61  | 1364 | 1424 |

|             |                 |     |      |      |
|-------------|-----------------|-----|------|------|
| LmjF24.1300 | <i>L. major</i> | 86  | 68   | 153  |
| LmjF24.1340 | <i>L. major</i> | 64  | 436  | 499  |
| LmjF24.1340 | <i>L. major</i> | 81  | 621  | 701  |
| LmjF24.1340 | <i>L. major</i> | 61  | 832  | 892  |
| LmjF24.1350 | <i>L. major</i> | 66  | 304  | 369  |
| LmjF24.1350 | <i>L. major</i> | 84  | 805  | 888  |
| LmjF24.1360 | <i>L. major</i> | 43  | 1    | 43   |
| LmjF24.1360 | <i>L. major</i> | 94  | 377  | 470  |
| LmjF24.1360 | <i>L. major</i> | 94  | 377  | 470  |
| LmjF24.1370 | <i>L. major</i> | 80  | 1    | 80   |
| LmjF24.1370 | <i>L. major</i> | 50  | 487  | 536  |
| LmjF24.1380 | <i>L. major</i> | 142 | 81   | 222  |
| LmjF24.1390 | <i>L. major</i> | 72  | 77   | 148  |
| LmjF24.1400 | <i>L. major</i> | 162 | 1    | 162  |
| LmjF24.1410 | <i>L. major</i> | 49  | 98   | 146  |
| LmjF24.1420 | <i>L. major</i> | 53  | 218  | 270  |
| LmjF24.1420 | <i>L. major</i> | 78  | 296  | 373  |
| LmjF24.1420 | <i>L. major</i> | 63  | 503  | 565  |
| LmjF24.1420 | <i>L. major</i> | 271 | 589  | 859  |
| LmjF24.1420 | <i>L. major</i> | 59  | 872  | 930  |
| LmjF24.1420 | <i>L. major</i> | 128 | 1192 | 1319 |
| LmjF24.1430 | <i>L. major</i> | 327 | 1    | 327  |
| LmjF24.1430 | <i>L. major</i> | 235 | 359  | 593  |
| LmjF24.1430 | <i>L. major</i> | 413 | 647  | 1059 |
| LmjF24.1430 | <i>L. major</i> | 105 | 1100 | 1204 |
| LmjF24.1430 | <i>L. major</i> | 61  | 1207 | 1267 |
| LmjF24.1430 | <i>L. major</i> | 45  | 1360 | 1404 |
| LmjF24.1430 | <i>L. major</i> | 251 | 1630 | 1880 |
| LmjF24.1430 | <i>L. major</i> | 237 | 1965 | 2201 |
| LmjF24.1430 | <i>L. major</i> | 107 | 2207 | 2313 |
| LmjF24.1430 | <i>L. major</i> | 49  | 2346 | 2394 |
| LmjF24.1430 | <i>L. major</i> | 117 | 2473 | 2589 |
| LmjF24.1430 | <i>L. major</i> | 89  | 2620 | 2708 |
| LmjF24.1430 | <i>L. major</i> | 119 | 2725 | 2843 |
| LmjF24.1430 | <i>L. major</i> | 48  | 2862 | 2909 |
| LmjF24.1430 | <i>L. major</i> | 51  | 2962 | 3012 |
| LmjF24.1430 | <i>L. major</i> | 46  | 3088 | 3133 |
| LmjF24.1430 | <i>L. major</i> | 65  | 3170 | 3234 |
| LmjF24.1435 | <i>L. major</i> | 724 | 1    | 724  |
| LmjF24.1435 | <i>L. major</i> | 85  | 730  | 814  |
| LmjF24.1435 | <i>L. major</i> | 67  | 851  | 917  |
| LmjF24.1440 | <i>L. major</i> | 49  | 30   | 78   |
| LmjF24.1440 | <i>L. major</i> | 59  | 103  | 161  |
| LmjF24.1440 | <i>L. major</i> | 61  | 478  | 538  |
| LmjF24.1450 | <i>L. major</i> | 295 | 23   | 317  |
| LmjF24.1460 | <i>L. major</i> | 84  | 1    | 84   |
| LmjF24.1460 | <i>L. major</i> | 158 | 110  | 267  |

|             |                 |     |      |      |
|-------------|-----------------|-----|------|------|
| LmjF24.1460 | <i>L. major</i> | 48  | 360  | 407  |
| LmjF24.1460 | <i>L. major</i> | 47  | 477  | 523  |
| LmjF24.1460 | <i>L. major</i> | 97  | 589  | 685  |
| LmjF24.1470 | <i>L. major</i> | 49  | 101  | 149  |
| LmjF24.1470 | <i>L. major</i> | 168 | 282  | 449  |
| LmjF24.1470 | <i>L. major</i> | 53  | 470  | 522  |
| LmjF24.1470 | <i>L. major</i> | 212 | 587  | 798  |
| LmjF24.1470 | <i>L. major</i> | 55  | 826  | 880  |
| LmjF24.1470 | <i>L. major</i> | 83  | 918  | 1000 |
| LmjF24.1470 | <i>L. major</i> | 43  | 1244 | 1286 |
| LmjF24.1470 | <i>L. major</i> | 139 | 1486 | 1624 |
| LmjF24.1470 | <i>L. major</i> | 61  | 1709 | 1769 |
| LmjF24.1470 | <i>L. major</i> | 64  | 1790 | 1853 |
| LmjF24.1470 | <i>L. major</i> | 80  | 2021 | 2100 |
| LmjF24.1470 | <i>L. major</i> | 72  | 2119 | 2190 |
| LmjF24.1470 | <i>L. major</i> | 155 | 2300 | 2454 |
| LmjF24.1470 | <i>L. major</i> | 52  | 2526 | 2577 |
| LmjF24.1470 | <i>L. major</i> | 173 | 2604 | 2776 |
| LmjF24.1470 | <i>L. major</i> | 184 | 2867 | 3050 |
| LmjF24.1480 | <i>L. major</i> | 227 | 1    | 227  |
| LmjF24.1480 | <i>L. major</i> | 81  | 276  | 356  |
| LmjF24.1480 | <i>L. major</i> | 86  | 539  | 624  |
| LmjF24.1490 | <i>L. major</i> | 99  | 1    | 99   |
| LmjF24.1520 | <i>L. major</i> | 229 | 67   | 295  |
| LmjF24.1520 | <i>L. major</i> | 235 | 312  | 546  |
| LmjF24.1520 | <i>L. major</i> | 191 | 596  | 786  |
| LmjF24.1520 | <i>L. major</i> | 51  | 901  | 951  |
| LmjF24.1530 | <i>L. major</i> | 177 | 1    | 177  |
| LmjF24.1530 | <i>L. major</i> | 212 | 819  | 1030 |
| LmjF24.1530 | <i>L. major</i> | 573 | 1119 | 1691 |
| LmjF24.1550 | <i>L. major</i> | 85  | 73   | 157  |
| LmjF24.1550 | <i>L. major</i> | 191 | 193  | 383  |
| LmjF24.1550 | <i>L. major</i> | 61  | 411  | 471  |
| LmjF24.1550 | <i>L. major</i> | 54  | 480  | 533  |
| LmjF24.1550 | <i>L. major</i> | 66  | 731  | 796  |
| LmjF24.1560 | <i>L. major</i> | 40  | 325  | 364  |
| LmjF24.1560 | <i>L. major</i> | 78  | 419  | 496  |
| LmjF24.1560 | <i>L. major</i> | 78  | 419  | 496  |
| LmjF24.1570 | <i>L. major</i> | 228 | 1    | 228  |
| LmjF24.1570 | <i>L. major</i> | 283 | 410  | 692  |
| LmjF24.1580 | <i>L. major</i> | 64  | 301  | 364  |
| LmjF24.1590 | <i>L. major</i> | 252 | 269  | 520  |
| LmjF24.1640 | <i>L. major</i> | 78  | 318  | 395  |
| LmjF24.1650 | <i>L. major</i> | 75  | 1    | 75   |
| LmjF24.1650 | <i>L. major</i> | 78  | 149  | 226  |
| LmjF24.1650 | <i>L. major</i> | 160 | 242  | 401  |
| LmjF24.1650 | <i>L. major</i> | 65  | 420  | 484  |

|             |                 |     |      |      |
|-------------|-----------------|-----|------|------|
| LmjF24.1660 | <i>L. major</i> | 108 | 1    | 108  |
| LmjF24.1660 | <i>L. major</i> | 44  | 234  | 277  |
| LmjF24.1670 | <i>L. major</i> | 102 | 173  | 274  |
| LmjF24.1680 | <i>L. major</i> | 44  | 84   | 127  |
| LmjF24.1680 | <i>L. major</i> | 71  | 215  | 285  |
| LmjF24.1680 | <i>L. major</i> | 41  | 326  | 366  |
| LmjF24.1700 | <i>L. major</i> | 43  | 1    | 43   |
| LmjF24.1700 | <i>L. major</i> | 88  | 149  | 236  |
| LmjF24.1720 | <i>L. major</i> | 252 | 1    | 252  |
| LmjF24.1720 | <i>L. major</i> | 89  | 274  | 362  |
| LmjF24.1720 | <i>L. major</i> | 40  | 536  | 575  |
| LmjF24.1720 | <i>L. major</i> | 81  | 758  | 838  |
| LmjF24.1730 | <i>L. major</i> | 372 | 1    | 372  |
| LmjF24.1730 | <i>L. major</i> | 77  | 494  | 570  |
| LmjF24.1730 | <i>L. major</i> | 106 | 915  | 1020 |
| LmjF24.1730 | <i>L. major</i> | 47  | 1132 | 1178 |
| LmjF24.1740 | <i>L. major</i> | 112 | 94   | 205  |
| LmjF24.1750 | <i>L. major</i> | 128 | 81   | 208  |
| LmjF24.1750 | <i>L. major</i> | 42  | 294  | 335  |
| LmjF24.1750 | <i>L. major</i> | 42  | 294  | 335  |
| LmjF24.1760 | <i>L. major</i> | 57  | 59   | 115  |
| LmjF24.1780 | <i>L. major</i> | 41  | 471  | 511  |
| LmjF24.1780 | <i>L. major</i> | 52  | 588  | 639  |
| LmjF24.1780 | <i>L. major</i> | 52  | 1090 | 1141 |
| LmjF24.1790 | <i>L. major</i> | 129 | 1    | 129  |
| LmjF24.1810 | <i>L. major</i> | 57  | 278  | 334  |
| LmjF24.1820 | <i>L. major</i> | 105 | 16   | 120  |
| LmjF24.1830 | <i>L. major</i> | 135 | 34   | 168  |
| LmjF24.1850 | <i>L. major</i> | 92  | 84   | 175  |
| LmjF24.1850 | <i>L. major</i> | 82  | 185  | 266  |
| LmjF24.1860 | <i>L. major</i> | 412 | 1    | 412  |
| LmjF24.1870 | <i>L. major</i> | 80  | 42   | 121  |
| LmjF24.1870 | <i>L. major</i> | 60  | 381  | 440  |
| LmjF24.1870 | <i>L. major</i> | 60  | 471  | 530  |
| LmjF24.1870 | <i>L. major</i> | 80  | 668  | 747  |
| LmjF24.1870 | <i>L. major</i> | 133 | 769  | 901  |
| LmjF24.1870 | <i>L. major</i> | 143 | 992  | 1134 |
| LmjF24.1870 | <i>L. major</i> | 103 | 1168 | 1270 |
| LmjF24.1880 | <i>L. major</i> | 112 | 83   | 194  |
| LmjF24.1880 | <i>L. major</i> | 198 | 735  | 932  |
| LmjF24.1890 | <i>L. major</i> | 108 | 1    | 108  |
| LmjF24.1890 | <i>L. major</i> | 59  | 137  | 195  |
| LmjF24.1890 | <i>L. major</i> | 160 | 324  | 483  |
| LmjF24.1890 | <i>L. major</i> | 151 | 507  | 657  |
| LmjF24.1900 | <i>L. major</i> | 54  | 492  | 545  |
| LmjF24.1905 | <i>L. major</i> | 50  | 377  | 426  |
| LmjF24.1920 | <i>L. major</i> | 102 | 1    | 102  |

|             |                 |     |      |      |
|-------------|-----------------|-----|------|------|
| LmjF24.1920 | <i>L. major</i> | 68  | 225  | 292  |
| LmjF24.1920 | <i>L. major</i> | 62  | 411  | 472  |
| LmjF24.1920 | <i>L. major</i> | 47  | 476  | 522  |
| LmjF24.1930 | <i>L. major</i> | 121 | 1    | 121  |
| LmjF24.1930 | <i>L. major</i> | 44  | 156  | 199  |
| LmjF24.1930 | <i>L. major</i> | 70  | 427  | 496  |
| LmjF24.1930 | <i>L. major</i> | 49  | 579  | 627  |
| LmjF24.1940 | <i>L. major</i> | 147 | 1    | 147  |
| LmjF24.1950 | <i>L. major</i> | 54  | 290  | 343  |
| LmjF24.1950 | <i>L. major</i> | 44  | 531  | 574  |
| LmjF24.1950 | <i>L. major</i> | 44  | 531  | 574  |
| LmjF24.1960 | <i>L. major</i> | 363 | 1    | 363  |
| LmjF24.1960 | <i>L. major</i> | 55  | 410  | 464  |
| LmjF24.1960 | <i>L. major</i> | 50  | 486  | 535  |
| LmjF24.1960 | <i>L. major</i> | 291 | 542  | 832  |
| LmjF24.1970 | <i>L. major</i> | 54  | 40   | 93   |
| LmjF24.1970 | <i>L. major</i> | 60  | 194  | 253  |
| LmjF24.1970 | <i>L. major</i> | 43  | 282  | 324  |
| LmjF24.1970 | <i>L. major</i> | 40  | 533  | 572  |
| LmjF24.1980 | <i>L. major</i> | 190 | 42   | 231  |
| LmjF24.1990 | <i>L. major</i> | 120 | 29   | 148  |
| LmjF24.1990 | <i>L. major</i> | 153 | 180  | 332  |
| LmjF24.2000 | <i>L. major</i> | 63  | 79   | 141  |
| LmjF24.2000 | <i>L. major</i> | 42  | 193  | 234  |
| LmjF24.2000 | <i>L. major</i> | 42  | 193  | 234  |
| LmjF24.2010 | <i>L. major</i> | 71  | 517  | 587  |
| LmjF24.2010 | <i>L. major</i> | 108 | 607  | 714  |
| LmjF24.2010 | <i>L. major</i> | 60  | 766  | 825  |
| LmjF24.2020 | <i>L. major</i> | 87  | 1    | 87   |
| LmjF24.2020 | <i>L. major</i> | 40  | 147  | 186  |
| LmjF24.2020 | <i>L. major</i> | 41  | 477  | 517  |
| LmjF24.2020 | <i>L. major</i> | 62  | 1384 | 1445 |
| LmjF24.2050 | <i>L. major</i> | 40  | 1    | 40   |
| LmjF24.2050 | <i>L. major</i> | 41  | 103  | 143  |
| LmjF24.2050 | <i>L. major</i> | 41  | 103  | 143  |
| LmjF24.2070 | <i>L. major</i> | 46  | 1    | 46   |
| LmjF24.2070 | <i>L. major</i> | 79  | 122  | 200  |
| LmjF24.2070 | <i>L. major</i> | 79  | 122  | 200  |
| LmjF24.2080 | <i>L. major</i> | 46  | 1    | 46   |
| LmjF24.2080 | <i>L. major</i> | 79  | 122  | 200  |
| LmjF24.2080 | <i>L. major</i> | 79  | 122  | 200  |
| LmjF24.2100 | <i>L. major</i> | 91  | 220  | 310  |
| LmjF24.2120 | <i>L. major</i> | 54  | 13   | 66   |
| LmjF24.2120 | <i>L. major</i> | 219 | 77   | 295  |
| LmjF24.2140 | <i>L. major</i> | 68  | 1    | 68   |
| LmjF24.2150 | <i>L. major</i> | 75  | 1    | 75   |
| LmjF24.2170 | <i>L. major</i> | 41  | 180  | 220  |

|             |                 |     |      |      |
|-------------|-----------------|-----|------|------|
| LmjF24.2170 | <i>L. major</i> | 58  | 584  | 641  |
| LmjF24.2170 | <i>L. major</i> | 58  | 584  | 641  |
| LmjF24.2180 | <i>L. major</i> | 149 | 1    | 149  |
| LmjF24.2180 | <i>L. major</i> | 464 | 181  | 644  |
| LmjF24.2180 | <i>L. major</i> | 375 | 660  | 1034 |
| LmjF24.2180 | <i>L. major</i> | 368 | 1071 | 1438 |
| LmjF24.2190 | <i>L. major</i> | 57  | 1    | 57   |
| LmjF24.2190 | <i>L. major</i> | 40  | 208  | 247  |
| LmjF24.2240 | <i>L. major</i> | 54  | 123  | 176  |
| LmjF24.2260 | <i>L. major</i> | 67  | 1    | 67   |
| LmjF24.2280 | <i>L. major</i> | 57  | 242  | 298  |
| LmjF24.2280 | <i>L. major</i> | 69  | 745  | 813  |
| LmjF24.2280 | <i>L. major</i> | 69  | 745  | 813  |
| LmjF24.2310 | <i>L. major</i> | 66  | 98   | 163  |
| LmjF24.2320 | <i>L. major</i> | 87  | 1    | 87   |
| LmjF24.2330 | <i>L. major</i> | 85  | 174  | 258  |
| LmjF24.2340 | <i>L. major</i> | 41  | 189  | 229  |
| LmjF25.0030 | <i>L. major</i> | 84  | 382  | 465  |
| LmjF25.0040 | <i>L. major</i> | 118 | 174  | 291  |
| LmjF25.0040 | <i>L. major</i> | 130 | 388  | 517  |
| LmjF25.0040 | <i>L. major</i> | 170 | 545  | 714  |
| LmjF25.0040 | <i>L. major</i> | 42  | 726  | 767  |
| LmjF25.0040 | <i>L. major</i> | 76  | 855  | 930  |
| LmjF25.0040 | <i>L. major</i> | 59  | 944  | 1002 |
| LmjF25.0040 | <i>L. major</i> | 66  | 1191 | 1256 |
| LmjF25.0050 | <i>L. major</i> | 59  | 113  | 171  |
| LmjF25.0060 | <i>L. major</i> | 66  | 1    | 66   |
| LmjF25.0070 | <i>L. major</i> | 44  | 105  | 148  |
| LmjF25.0080 | <i>L. major</i> | 142 | 345  | 486  |
| LmjF25.0090 | <i>L. major</i> | 66  | 1    | 66   |
| LmjF25.0110 | <i>L. major</i> | 48  | 286  | 333  |
| LmjF25.0120 | <i>L. major</i> | 42  | 197  | 238  |
| LmjF25.0150 | <i>L. major</i> | 41  | 151  | 191  |
| LmjF25.0150 | <i>L. major</i> | 50  | 239  | 288  |
| LmjF25.0150 | <i>L. major</i> | 69  | 326  | 394  |
| LmjF25.0160 | <i>L. major</i> | 44  | 38   | 81   |
| LmjF25.0160 | <i>L. major</i> | 92  | 124  | 215  |
| LmjF25.0160 | <i>L. major</i> | 92  | 124  | 215  |
| LmjF25.0170 | <i>L. major</i> | 124 | 387  | 510  |
| LmjF25.0170 | <i>L. major</i> | 41  | 538  | 578  |
| LmjF25.0170 | <i>L. major</i> | 105 | 674  | 778  |
| LmjF25.0180 | <i>L. major</i> | 55  | 92   | 146  |
| LmjF25.0200 | <i>L. major</i> | 60  | 812  | 871  |
| LmjF25.0220 | <i>L. major</i> | 168 | 126  | 293  |
| LmjF25.0220 | <i>L. major</i> | 157 | 557  | 713  |
| LmjF25.0230 | <i>L. major</i> | 85  | 1    | 85   |
| LmjF25.0240 | <i>L. major</i> | 100 | 1    | 100  |

|             |                 |     |      |      |
|-------------|-----------------|-----|------|------|
| LmjF25.0250 | <i>L. major</i> | 266 | 319  | 584  |
| LmjF25.0250 | <i>L. major</i> | 264 | 614  | 877  |
| LmjF25.0270 | <i>L. major</i> | 43  | 1    | 43   |
| LmjF25.0270 | <i>L. major</i> | 53  | 264  | 316  |
| LmjF25.0270 | <i>L. major</i> | 111 | 419  | 529  |
| LmjF25.0270 | <i>L. major</i> | 56  | 574  | 629  |
| LmjF25.0270 | <i>L. major</i> | 41  | 650  | 690  |
| LmjF25.0270 | <i>L. major</i> | 106 | 740  | 845  |
| LmjF25.0270 | <i>L. major</i> | 222 | 935  | 1156 |
| LmjF25.0280 | <i>L. major</i> | 106 | 99   | 204  |
| LmjF25.0280 | <i>L. major</i> | 153 | 227  | 379  |
| LmjF25.0280 | <i>L. major</i> | 63  | 434  | 496  |
| LmjF25.0280 | <i>L. major</i> | 130 | 562  | 691  |
| LmjF25.0290 | <i>L. major</i> | 120 | 173  | 292  |
| LmjF25.0290 | <i>L. major</i> | 161 | 424  | 584  |
| LmjF25.0300 | <i>L. major</i> | 41  | 453  | 493  |
| LmjF25.0310 | <i>L. major</i> | 195 | 241  | 435  |
| LmjF25.0310 | <i>L. major</i> | 50  | 501  | 550  |
| LmjF25.0310 | <i>L. major</i> | 137 | 586  | 722  |
| LmjF25.0310 | <i>L. major</i> | 69  | 742  | 810  |
| LmjF25.0310 | <i>L. major</i> | 174 | 909  | 1082 |
| LmjF25.0330 | <i>L. major</i> | 398 | 1    | 398  |
| LmjF25.0330 | <i>L. major</i> | 57  | 417  | 473  |
| LmjF25.0340 | <i>L. major</i> | 74  | 448  | 521  |
| LmjF25.0350 | <i>L. major</i> | 68  | 46   | 113  |
| LmjF25.0350 | <i>L. major</i> | 91  | 124  | 214  |
| LmjF25.0350 | <i>L. major</i> | 76  | 253  | 328  |
| LmjF25.0370 | <i>L. major</i> | 74  | 1    | 74   |
| LmjF25.0370 | <i>L. major</i> | 46  | 134  | 179  |
| LmjF25.0370 | <i>L. major</i> | 46  | 134  | 179  |
| LmjF25.0380 | <i>L. major</i> | 441 | 63   | 503  |
| LmjF25.0380 | <i>L. major</i> | 63  | 524  | 586  |
| LmjF25.0380 | <i>L. major</i> | 127 | 621  | 747  |
| LmjF25.0380 | <i>L. major</i> | 40  | 814  | 853  |
| LmjF25.0390 | <i>L. major</i> | 43  | 1    | 43   |
| LmjF25.0410 | <i>L. major</i> | 123 | 1    | 123  |
| LmjF25.0420 | <i>L. major</i> | 197 | 97   | 293  |
| LmjF25.0420 | <i>L. major</i> | 460 | 525  | 984  |
| LmjF25.0420 | <i>L. major</i> | 49  | 1005 | 1053 |
| LmjF25.0420 | <i>L. major</i> | 277 | 1171 | 1447 |
| LmjF25.0420 | <i>L. major</i> | 265 | 1471 | 1735 |
| LmjF25.0430 | <i>L. major</i> | 150 | 87   | 236  |
| LmjF25.0440 | <i>L. major</i> | 42  | 44   | 85   |
| LmjF25.0440 | <i>L. major</i> | 42  | 269  | 310  |
| LmjF25.0440 | <i>L. major</i> | 114 | 365  | 478  |
| LmjF25.0440 | <i>L. major</i> | 77  | 497  | 573  |
| LmjF25.0440 | <i>L. major</i> | 53  | 620  | 672  |

|             |                 |     |      |      |
|-------------|-----------------|-----|------|------|
| LmjF25.0450 | <i>L. major</i> | 50  | 1    | 50   |
| LmjF25.0450 | <i>L. major</i> | 50  | 104  | 153  |
| LmjF25.0450 | <i>L. major</i> | 50  | 104  | 153  |
| LmjF25.0460 | <i>L. major</i> | 63  | 1    | 63   |
| LmjF25.0470 | <i>L. major</i> | 40  | 556  | 595  |
| LmjF25.0470 | <i>L. major</i> | 48  | 1042 | 1089 |
| LmjF25.0470 | <i>L. major</i> | 48  | 1042 | 1089 |
| LmjF25.0480 | <i>L. major</i> | 53  | 151  | 203  |
| LmjF25.0480 | <i>L. major</i> | 53  | 435  | 487  |
| LmjF25.0480 | <i>L. major</i> | 41  | 699  | 739  |
| LmjF25.0480 | <i>L. major</i> | 43  | 841  | 883  |
| LmjF25.0480 | <i>L. major</i> | 61  | 1012 | 1072 |
| LmjF25.0480 | <i>L. major</i> | 91  | 1135 | 1225 |
| LmjF25.0480 | <i>L. major</i> | 255 | 1254 | 1508 |
| LmjF25.0490 | <i>L. major</i> | 44  | 1    | 44   |
| LmjF25.0490 | <i>L. major</i> | 62  | 116  | 177  |
| LmjF25.0490 | <i>L. major</i> | 62  | 116  | 177  |
| LmjF25.0500 | <i>L. major</i> | 62  | 106  | 167  |
| LmjF25.0510 | <i>L. major</i> | 48  | 166  | 213  |
| LmjF25.0520 | <i>L. major</i> | 69  | 139  | 207  |
| LmjF25.0540 | <i>L. major</i> | 222 | 74   | 295  |
| LmjF25.0550 | <i>L. major</i> | 82  | 1    | 82   |
| LmjF25.0550 | <i>L. major</i> | 67  | 141  | 207  |
| LmjF25.0550 | <i>L. major</i> | 48  | 509  | 556  |
| LmjF25.0560 | <i>L. major</i> | 49  | 27   | 75   |
| LmjF25.0570 | <i>L. major</i> | 98  | 100  | 197  |
| LmjF25.0590 | <i>L. major</i> | 49  | 1    | 49   |
| LmjF25.0600 | <i>L. major</i> | 58  | 54   | 111  |
| LmjF25.0600 | <i>L. major</i> | 74  | 273  | 346  |
| LmjF25.0600 | <i>L. major</i> | 74  | 273  | 346  |
| LmjF25.0610 | <i>L. major</i> | 66  | 1    | 66   |
| LmjF25.0610 | <i>L. major</i> | 82  | 599  | 680  |
| LmjF25.0610 | <i>L. major</i> | 50  | 1026 | 1075 |
| LmjF25.0620 | <i>L. major</i> | 53  | 1    | 53   |
| LmjF25.0620 | <i>L. major</i> | 46  | 283  | 328  |
| LmjF25.0640 | <i>L. major</i> | 61  | 30   | 90   |
| LmjF25.0650 | <i>L. major</i> | 60  | 42   | 101  |
| LmjF25.0650 | <i>L. major</i> | 110 | 364  | 473  |
| LmjF25.0670 | <i>L. major</i> | 452 | 142  | 593  |
| LmjF25.0680 | <i>L. major</i> | 938 | 1    | 938  |
| LmjF25.0680 | <i>L. major</i> | 74  | 942  | 1015 |
| LmjF25.0680 | <i>L. major</i> | 99  | 1020 | 1118 |
| LmjF25.0680 | <i>L. major</i> | 142 | 1355 | 1496 |
| LmjF25.0680 | <i>L. major</i> | 213 | 1514 | 1726 |
| LmjF25.0690 | <i>L. major</i> | 55  | 1    | 55   |
| LmjF25.0690 | <i>L. major</i> | 43  | 531  | 573  |
| LmjF25.0690 | <i>L. major</i> | 52  | 697  | 748  |



|             |                 |     |      |      |
|-------------|-----------------|-----|------|------|
| LmjF25.0690 | <i>L. major</i> | 91  | 779  | 869  |
| LmjF25.0700 | <i>L. major</i> | 54  | 1    | 54   |
| LmjF25.0700 | <i>L. major</i> | 61  | 174  | 234  |
| LmjF25.0700 | <i>L. major</i> | 65  | 255  | 319  |
| LmjF25.0700 | <i>L. major</i> | 145 | 354  | 498  |
| LmjF25.0710 | <i>L. major</i> | 154 | 1    | 154  |
| LmjF25.0715 | <i>L. major</i> | 62  | 1    | 62   |
| LmjF25.0715 | <i>L. major</i> | 73  | 208  | 280  |
| LmjF25.0715 | <i>L. major</i> | 73  | 208  | 280  |
| LmjF25.0720 | <i>L. major</i> | 46  | 96   | 141  |
| LmjF25.0730 | <i>L. major</i> | 46  | 96   | 141  |
| LmjF25.0740 | <i>L. major</i> | 53  | 99   | 151  |
| LmjF25.0740 | <i>L. major</i> | 146 | 289  | 434  |
| LmjF25.0740 | <i>L. major</i> | 67  | 446  | 512  |
| LmjF25.0740 | <i>L. major</i> | 67  | 847  | 913  |
| LmjF25.0750 | <i>L. major</i> | 117 | 290  | 406  |
| LmjF25.0760 | <i>L. major</i> | 68  | 1    | 68   |
| LmjF25.0770 | <i>L. major</i> | 52  | 11   | 62   |
| LmjF25.0770 | <i>L. major</i> | 74  | 94   | 167  |
| LmjF25.0770 | <i>L. major</i> | 107 | 410  | 516  |
| LmjF25.0780 | <i>L. major</i> | 41  | 68   | 108  |
| LmjF25.0780 | <i>L. major</i> | 109 | 199  | 307  |
| LmjF25.0790 | <i>L. major</i> | 50  | 1    | 50   |
| LmjF25.0790 | <i>L. major</i> | 101 | 224  | 324  |
| LmjF25.0790 | <i>L. major</i> | 58  | 652  | 709  |
| LmjF25.0790 | <i>L. major</i> | 47  | 736  | 782  |
| LmjF25.0790 | <i>L. major</i> | 40  | 882  | 921  |
| LmjF25.0800 | <i>L. major</i> | 144 | 1    | 144  |
| LmjF25.0810 | <i>L. major</i> | 42  | 62   | 103  |
| LmjF25.0810 | <i>L. major</i> | 51  | 204  | 254  |
| LmjF25.0810 | <i>L. major</i> | 123 | 299  | 421  |
| LmjF25.0810 | <i>L. major</i> | 47  | 641  | 687  |
| LmjF25.0810 | <i>L. major</i> | 46  | 719  | 764  |
| LmjF25.0810 | <i>L. major</i> | 85  | 789  | 873  |
| LmjF25.0810 | <i>L. major</i> | 91  | 894  | 984  |
| LmjF25.0830 | <i>L. major</i> | 100 | 71   | 170  |
| LmjF25.0830 | <i>L. major</i> | 91  | 300  | 390  |
| LmjF25.0830 | <i>L. major</i> | 80  | 562  | 641  |
| LmjF25.0830 | <i>L. major</i> | 159 | 819  | 977  |
| LmjF25.0840 | <i>L. major</i> | 146 | 233  | 378  |
| LmjF25.0850 | <i>L. major</i> | 138 | 186  | 323  |
| LmjF25.0850 | <i>L. major</i> | 447 | 378  | 824  |
| LmjF25.0850 | <i>L. major</i> | 197 | 841  | 1037 |
| LmjF25.0850 | <i>L. major</i> | 103 | 1045 | 1147 |
| LmjF25.0860 | <i>L. major</i> | 315 | 17   | 331  |
| LmjF25.0860 | <i>L. major</i> | 331 | 636  | 966  |
| LmjF25.0860 | <i>L. major</i> | 109 | 976  | 1084 |

|             |                 |     |      |      |
|-------------|-----------------|-----|------|------|
| LmjF25.0880 | <i>L. major</i> | 47  | 125  | 171  |
| LmjF25.0880 | <i>L. major</i> | 581 | 251  | 831  |
| LmjF25.0880 | <i>L. major</i> | 59  | 872  | 930  |
| LmjF25.0880 | <i>L. major</i> | 115 | 938  | 1052 |
| LmjF25.0880 | <i>L. major</i> | 179 | 1092 | 1270 |
| LmjF25.0880 | <i>L. major</i> | 49  | 1275 | 1323 |
| LmjF25.0900 | <i>L. major</i> | 58  | 132  | 189  |
| LmjF25.0900 | <i>L. major</i> | 65  | 276  | 340  |
| LmjF25.0910 | <i>L. major</i> | 43  | 78   | 120  |
| LmjF25.0920 | <i>L. major</i> | 177 | 1    | 177  |
| LmjF25.0920 | <i>L. major</i> | 270 | 276  | 545  |
| LmjF25.0920 | <i>L. major</i> | 44  | 588  | 631  |
| LmjF25.0920 | <i>L. major</i> | 150 | 653  | 802  |
| LmjF25.0920 | <i>L. major</i> | 60  | 812  | 871  |
| LmjF25.0930 | <i>L. major</i> | 43  | 101  | 143  |
| LmjF25.0940 | <i>L. major</i> | 229 | 79   | 307  |
| LmjF25.0940 | <i>L. major</i> | 47  | 343  | 389  |
| LmjF25.0940 | <i>L. major</i> | 86  | 418  | 503  |
| LmjF25.0940 | <i>L. major</i> | 91  | 516  | 606  |
| LmjF25.0950 | <i>L. major</i> | 166 | 262  | 427  |
| LmjF25.0970 | <i>L. major</i> | 390 | 80   | 469  |
| LmjF25.0970 | <i>L. major</i> | 50  | 535  | 584  |
| LmjF25.0970 | <i>L. major</i> | 305 | 624  | 928  |
| LmjF25.0970 | <i>L. major</i> | 98  | 1002 | 1099 |
| LmjF25.0970 | <i>L. major</i> | 42  | 1165 | 1206 |
| LmjF25.0980 | <i>L. major</i> | 40  | 2889 | 2928 |
| LmjF25.0980 | <i>L. major</i> | 97  | 3202 | 3298 |
| LmjF25.0980 | <i>L. major</i> | 60  | 3453 | 3512 |
| LmjF25.0980 | <i>L. major</i> | 47  | 3631 | 3677 |
| LmjF25.0980 | <i>L. major</i> | 72  | 3745 | 3816 |
| LmjF25.1000 | <i>L. major</i> | 176 | 1    | 176  |
| LmjF25.1000 | <i>L. major</i> | 190 | 178  | 367  |
| LmjF25.1000 | <i>L. major</i> | 96  | 378  | 473  |
| LmjF25.1000 | <i>L. major</i> | 69  | 488  | 556  |
| LmjF25.1000 | <i>L. major</i> | 93  | 558  | 650  |
| LmjF25.1010 | <i>L. major</i> | 53  | 272  | 324  |
| LmjF25.1020 | <i>L. major</i> | 60  | 236  | 295  |
| LmjF25.1020 | <i>L. major</i> | 84  | 348  | 431  |
| LmjF25.1030 | <i>L. major</i> | 94  | 451  | 544  |
| LmjF25.1030 | <i>L. major</i> | 64  | 640  | 703  |
| LmjF25.1030 | <i>L. major</i> | 47  | 712  | 758  |
| LmjF25.1040 | <i>L. major</i> | 65  | 1    | 65   |
| LmjF25.1040 | <i>L. major</i> | 42  | 164  | 205  |
| LmjF25.1040 | <i>L. major</i> | 481 | 236  | 716  |
| LmjF25.1050 | <i>L. major</i> | 42  | 21   | 62   |
| LmjF25.1060 | <i>L. major</i> | 344 | 1    | 344  |
| LmjF25.1060 | <i>L. major</i> | 83  | 426  | 508  |

|             |                 |     |      |      |
|-------------|-----------------|-----|------|------|
| LmjF25.1060 | <i>L. major</i> | 230 | 526  | 755  |
| LmjF25.1070 | <i>L. major</i> | 144 | 1    | 144  |
| LmjF25.1070 | <i>L. major</i> | 234 | 210  | 443  |
| LmjF25.1070 | <i>L. major</i> | 58  | 567  | 624  |
| LmjF25.1070 | <i>L. major</i> | 76  | 704  | 779  |
| LmjF25.1070 | <i>L. major</i> | 70  | 789  | 858  |
| LmjF25.1080 | <i>L. major</i> | 292 | 164  | 455  |
| LmjF25.1110 | <i>L. major</i> | 797 | 1    | 797  |
| LmjF25.1110 | <i>L. major</i> | 80  | 876  | 955  |
| LmjF25.1110 | <i>L. major</i> | 191 | 1030 | 1220 |
| LmjF25.1110 | <i>L. major</i> | 132 | 1236 | 1367 |
| LmjF25.1110 | <i>L. major</i> | 61  | 1510 | 1570 |
| LmjF25.1110 | <i>L. major</i> | 209 | 1603 | 1811 |
| LmjF25.1110 | <i>L. major</i> | 67  | 2214 | 2280 |
| LmjF25.1110 | <i>L. major</i> | 45  | 2334 | 2378 |
| LmjF25.1110 | <i>L. major</i> | 46  | 2586 | 2631 |
| LmjF25.1110 | <i>L. major</i> | 46  | 2697 | 2742 |
| LmjF25.1110 | <i>L. major</i> | 40  | 2783 | 2822 |
| LmjF25.1110 | <i>L. major</i> | 110 | 2894 | 3003 |
| LmjF25.1110 | <i>L. major</i> | 69  | 3065 | 3133 |
| LmjF25.1110 | <i>L. major</i> | 104 | 3171 | 3274 |
| LmjF25.1110 | <i>L. major</i> | 54  | 3277 | 3330 |
| LmjF25.1110 | <i>L. major</i> | 87  | 3681 | 3767 |
| LmjF25.1110 | <i>L. major</i> | 63  | 3769 | 3831 |
| LmjF25.1110 | <i>L. major</i> | 88  | 3858 | 3945 |
| LmjF25.1110 | <i>L. major</i> | 56  | 4122 | 4177 |
| LmjF25.1110 | <i>L. major</i> | 63  | 4184 | 4246 |
| LmjF25.1110 | <i>L. major</i> | 78  | 4548 | 4625 |
| LmjF25.1110 | <i>L. major</i> | 142 | 4674 | 4815 |
| LmjF25.1110 | <i>L. major</i> | 81  | 4853 | 4933 |
| LmjF25.1110 | <i>L. major</i> | 40  | 4959 | 4998 |
| LmjF25.1110 | <i>L. major</i> | 106 | 5083 | 5188 |
| LmjF25.1110 | <i>L. major</i> | 89  | 5440 | 5528 |
| LmjF25.1110 | <i>L. major</i> | 86  | 5660 | 5745 |
| LmjF25.1110 | <i>L. major</i> | 58  | 5808 | 5865 |
| LmjF25.1110 | <i>L. major</i> | 63  | 5894 | 5956 |
| LmjF25.1110 | <i>L. major</i> | 88  | 5982 | 6069 |
| LmjF25.1110 | <i>L. major</i> | 103 | 6156 | 6258 |
| LmjF25.1110 | <i>L. major</i> | 49  | 6437 | 6485 |
| LmjF25.1140 | <i>L. major</i> | 96  | 67   | 162  |
| LmjF25.1140 | <i>L. major</i> | 152 | 207  | 358  |
| LmjF25.1140 | <i>L. major</i> | 49  | 385  | 433  |
| LmjF25.1140 | <i>L. major</i> | 57  | 487  | 543  |
| LmjF25.1190 | <i>L. major</i> | 40  | 1    | 40   |
| LmjF25.1200 | <i>L. major</i> | 56  | 60   | 115  |
| LmjF25.1200 | <i>L. major</i> | 65  | 250  | 314  |
| LmjF25.1200 | <i>L. major</i> | 50  | 371  | 420  |

|             |                 |     |      |      |
|-------------|-----------------|-----|------|------|
| LmjF25.1200 | <i>L. major</i> | 54  | 617  | 670  |
| LmjF25.1200 | <i>L. major</i> | 70  | 724  | 793  |
| LmjF25.1210 | <i>L. major</i> | 274 | 1    | 274  |
| LmjF25.1210 | <i>L. major</i> | 44  | 466  | 509  |
| LmjF25.1210 | <i>L. major</i> | 40  | 901  | 940  |
| LmjF25.1220 | <i>L. major</i> | 48  | 83   | 130  |
| LmjF25.1220 | <i>L. major</i> | 60  | 177  | 236  |
| LmjF25.1220 | <i>L. major</i> | 44  | 528  | 571  |
| LmjF25.1250 | <i>L. major</i> | 83  | 34   | 116  |
| LmjF25.1250 | <i>L. major</i> | 54  | 154  | 207  |
| LmjF25.1250 | <i>L. major</i> | 98  | 262  | 359  |
| LmjF25.1250 | <i>L. major</i> | 148 | 535  | 682  |
| LmjF25.1250 | <i>L. major</i> | 46  | 771  | 816  |
| LmjF25.1250 | <i>L. major</i> | 57  | 855  | 911  |
| LmjF25.1250 | <i>L. major</i> | 113 | 974  | 1086 |
| LmjF25.1250 | <i>L. major</i> | 166 | 1532 | 1697 |
| LmjF25.1250 | <i>L. major</i> | 152 | 1748 | 1899 |
| LmjF25.1260 | <i>L. major</i> | 65  | 175  | 239  |
| LmjF25.1260 | <i>L. major</i> | 95  | 266  | 360  |
| LmjF25.1260 | <i>L. major</i> | 132 | 393  | 524  |
| LmjF25.1260 | <i>L. major</i> | 125 | 793  | 917  |
| LmjF25.1260 | <i>L. major</i> | 61  | 954  | 1014 |
| LmjF25.1260 | <i>L. major</i> | 145 | 1088 | 1232 |
| LmjF25.1260 | <i>L. major</i> | 127 | 1252 | 1378 |
| LmjF25.1260 | <i>L. major</i> | 80  | 1454 | 1533 |
| LmjF25.1260 | <i>L. major</i> | 72  | 1558 | 1629 |
| LmjF25.1260 | <i>L. major</i> | 64  | 1658 | 1721 |
| LmjF25.1260 | <i>L. major</i> | 44  | 1805 | 1848 |
| LmjF25.1260 | <i>L. major</i> | 99  | 1905 | 2003 |
| LmjF25.1260 | <i>L. major</i> | 224 | 2103 | 2326 |
| LmjF25.1270 | <i>L. major</i> | 48  | 102  | 149  |
| LmjF25.1270 | <i>L. major</i> | 136 | 169  | 304  |
| LmjF25.1270 | <i>L. major</i> | 180 | 331  | 510  |
| LmjF25.1280 | <i>L. major</i> | 60  | 112  | 171  |
| LmjF25.1280 | <i>L. major</i> | 69  | 351  | 419  |
| LmjF25.1280 | <i>L. major</i> | 102 | 647  | 748  |
| LmjF25.1280 | <i>L. major</i> | 82  | 1000 | 1081 |
| LmjF25.1290 | <i>L. major</i> | 98  | 52   | 149  |
| LmjF25.1300 | <i>L. major</i> | 60  | 12   | 71   |
| LmjF25.1300 | <i>L. major</i> | 75  | 135  | 209  |
| LmjF25.1300 | <i>L. major</i> | 40  | 460  | 499  |
| LmjF25.1300 | <i>L. major</i> | 89  | 540  | 628  |
| LmjF25.1310 | <i>L. major</i> | 50  | 1    | 50   |
| LmjF25.1310 | <i>L. major</i> | 75  | 111  | 185  |
| LmjF25.1330 | <i>L. major</i> | 73  | 147  | 219  |
| LmjF25.1330 | <i>L. major</i> | 184 | 255  | 438  |
| LmjF25.1330 | <i>L. major</i> | 135 | 555  | 689  |

|             |                 |     |      |      |
|-------------|-----------------|-----|------|------|
| LmjF25.1340 | <i>L. major</i> | 250 | 1    | 250  |
| LmjF25.1350 | <i>L. major</i> | 159 | 23   | 181  |
| LmjF25.1350 | <i>L. major</i> | 123 | 183  | 305  |
| LmjF25.1350 | <i>L. major</i> | 131 | 349  | 479  |
| LmjF25.1350 | <i>L. major</i> | 45  | 620  | 664  |
| LmjF25.1350 | <i>L. major</i> | 40  | 717  | 756  |
| LmjF25.1350 | <i>L. major</i> | 66  | 849  | 914  |
| LmjF25.1350 | <i>L. major</i> | 69  | 1184 | 1252 |
| LmjF25.1350 | <i>L. major</i> | 82  | 1640 | 1721 |
| LmjF25.1350 | <i>L. major</i> | 62  | 1936 | 1997 |
| LmjF25.1350 | <i>L. major</i> | 231 | 2035 | 2265 |
| LmjF25.1350 | <i>L. major</i> | 57  | 2338 | 2394 |
| LmjF25.1350 | <i>L. major</i> | 44  | 2506 | 2549 |
| LmjF25.1360 | <i>L. major</i> | 54  | 1    | 54   |
| LmjF25.1360 | <i>L. major</i> | 43  | 86   | 128  |
| LmjF25.1360 | <i>L. major</i> | 110 | 160  | 269  |
| LmjF25.1360 | <i>L. major</i> | 153 | 577  | 729  |
| LmjF25.1360 | <i>L. major</i> | 40  | 772  | 811  |
| LmjF25.1360 | <i>L. major</i> | 108 | 858  | 965  |
| LmjF25.1370 | <i>L. major</i> | 78  | 98   | 175  |
| LmjF25.1370 | <i>L. major</i> | 74  | 209  | 282  |
| LmjF25.1370 | <i>L. major</i> | 81  | 393  | 473  |
| LmjF25.1380 | <i>L. major</i> | 68  | 34   | 101  |
| LmjF25.1380 | <i>L. major</i> | 116 | 121  | 236  |
| LmjF25.1400 | <i>L. major</i> | 70  | 73   | 142  |
| LmjF25.1400 | <i>L. major</i> | 104 | 292  | 395  |
| LmjF25.1410 | <i>L. major</i> | 53  | 116  | 168  |
| LmjF25.1410 | <i>L. major</i> | 75  | 360  | 434  |
| LmjF25.1410 | <i>L. major</i> | 46  | 511  | 556  |
| LmjF25.1430 | <i>L. major</i> | 93  | 155  | 247  |
| LmjF25.1430 | <i>L. major</i> | 217 | 271  | 487  |
| LmjF25.1440 | <i>L. major</i> | 208 | 302  | 509  |
| LmjF25.1443 | <i>L. major</i> | 48  | 97   | 144  |
| LmjF25.1443 | <i>L. major</i> | 43  | 205  | 247  |
| LmjF25.1443 | <i>L. major</i> | 43  | 205  | 247  |
| LmjF25.1450 | <i>L. major</i> | 43  | 297  | 339  |
| LmjF25.1450 | <i>L. major</i> | 50  | 345  | 394  |
| LmjF25.1450 | <i>L. major</i> | 50  | 345  | 394  |
| LmjF25.1460 | <i>L. major</i> | 46  | 208  | 253  |
| LmjF25.1460 | <i>L. major</i> | 69  | 410  | 478  |
| LmjF25.1460 | <i>L. major</i> | 74  | 647  | 720  |
| LmjF25.1480 | <i>L. major</i> | 73  | 122  | 194  |
| LmjF25.1490 | <i>L. major</i> | 56  | 64   | 119  |
| LmjF25.1490 | <i>L. major</i> | 99  | 194  | 292  |
| LmjF25.1490 | <i>L. major</i> | 63  | 532  | 594  |
| LmjF25.1490 | <i>L. major</i> | 92  | 615  | 706  |
| LmjF25.1490 | <i>L. major</i> | 92  | 765  | 856  |

|             |                 |     |      |      |
|-------------|-----------------|-----|------|------|
| LmjF25.1490 | <i>L. major</i> | 45  | 919  | 963  |
| LmjF25.1490 | <i>L. major</i> | 49  | 1168 | 1216 |
| LmjF25.1500 | <i>L. major</i> | 47  | 298  | 344  |
| LmjF25.1500 | <i>L. major</i> | 83  | 397  | 479  |
| LmjF25.1500 | <i>L. major</i> | 83  | 397  | 479  |
| LmjF25.1510 | <i>L. major</i> | 259 | 250  | 508  |
| LmjF25.1520 | <i>L. major</i> | 185 | 1    | 185  |
| LmjF25.1520 | <i>L. major</i> | 103 | 208  | 310  |
| LmjF25.1520 | <i>L. major</i> | 61  | 319  | 379  |
| LmjF25.1520 | <i>L. major</i> | 43  | 410  | 452  |
| LmjF25.1520 | <i>L. major</i> | 52  | 686  | 737  |
| LmjF25.1520 | <i>L. major</i> | 204 | 741  | 944  |
| LmjF25.1530 | <i>L. major</i> | 40  | 149  | 188  |
| LmjF25.1530 | <i>L. major</i> | 42  | 505  | 546  |
| LmjF25.1530 | <i>L. major</i> | 42  | 505  | 546  |
| LmjF25.1540 | <i>L. major</i> | 85  | 1    | 85   |
| LmjF25.1540 | <i>L. major</i> | 40  | 656  | 695  |
| LmjF25.1560 | <i>L. major</i> | 126 | 14   | 139  |
| LmjF25.1560 | <i>L. major</i> | 74  | 333  | 406  |
| LmjF25.1560 | <i>L. major</i> | 98  | 472  | 569  |
| LmjF25.1560 | <i>L. major</i> | 40  | 723  | 762  |
| LmjF25.1570 | <i>L. major</i> | 40  | 113  | 152  |
| LmjF25.1570 | <i>L. major</i> | 65  | 295  | 359  |
| LmjF25.1570 | <i>L. major</i> | 77  | 827  | 903  |
| LmjF25.1570 | <i>L. major</i> | 68  | 1148 | 1215 |
| LmjF25.1570 | <i>L. major</i> | 61  | 1253 | 1313 |
| LmjF25.1570 | <i>L. major</i> | 67  | 1629 | 1695 |
| LmjF25.1570 | <i>L. major</i> | 65  | 1774 | 1838 |
| LmjF25.1570 | <i>L. major</i> | 46  | 1891 | 1936 |
| LmjF25.1570 | <i>L. major</i> | 85  | 2052 | 2136 |
| LmjF25.1570 | <i>L. major</i> | 94  | 2171 | 2264 |
| LmjF25.1580 | <i>L. major</i> | 44  | 71   | 114  |
| LmjF25.1580 | <i>L. major</i> | 76  | 332  | 407  |
| LmjF25.1580 | <i>L. major</i> | 68  | 438  | 505  |
| LmjF25.1590 | <i>L. major</i> | 496 | 84   | 579  |
| LmjF25.1590 | <i>L. major</i> | 58  | 748  | 805  |
| LmjF25.1590 | <i>L. major</i> | 49  | 913  | 961  |
| LmjF25.1590 | <i>L. major</i> | 130 | 1017 | 1146 |
| LmjF25.1600 | <i>L. major</i> | 41  | 123  | 163  |
| LmjF25.1600 | <i>L. major</i> | 53  | 577  | 629  |
| LmjF25.1600 | <i>L. major</i> | 54  | 735  | 788  |
| LmjF25.1600 | <i>L. major</i> | 42  | 1130 | 1171 |
| LmjF25.1610 | <i>L. major</i> | 69  | 201  | 269  |
| LmjF25.1630 | <i>L. major</i> | 121 | 1    | 121  |
| LmjF25.1630 | <i>L. major</i> | 76  | 176  | 251  |
| LmjF25.1640 | <i>L. major</i> | 58  | 216  | 273  |
| LmjF25.1640 | <i>L. major</i> | 47  | 321  | 367  |

|             |                 |     |      |      |
|-------------|-----------------|-----|------|------|
| LmjF25.1640 | <i>L. major</i> | 70  | 407  | 476  |
| LmjF25.1645 | <i>L. major</i> | 58  | 1    | 58   |
| LmjF25.1660 | <i>L. major</i> | 86  | 485  | 570  |
| LmjF25.1680 | <i>L. major</i> | 136 | 1    | 136  |
| LmjF25.1680 | <i>L. major</i> | 97  | 175  | 271  |
| LmjF25.1680 | <i>L. major</i> | 183 | 549  | 731  |
| LmjF25.1680 | <i>L. major</i> | 167 | 747  | 913  |
| LmjF25.1680 | <i>L. major</i> | 44  | 1109 | 1152 |
| LmjF25.1680 | <i>L. major</i> | 44  | 1407 | 1450 |
| LmjF25.1690 | <i>L. major</i> | 65  | 83   | 147  |
| LmjF25.1690 | <i>L. major</i> | 55  | 151  | 205  |
| LmjF25.1690 | <i>L. major</i> | 55  | 151  | 205  |
| LmjF25.1700 | <i>L. major</i> | 93  | 216  | 308  |
| LmjF25.1700 | <i>L. major</i> | 91  | 334  | 424  |
| LmjF25.1700 | <i>L. major</i> | 164 | 443  | 606  |
| LmjF25.1700 | <i>L. major</i> | 72  | 717  | 788  |
| LmjF25.1700 | <i>L. major</i> | 61  | 833  | 893  |
| LmjF25.1700 | <i>L. major</i> | 94  | 937  | 1030 |
| LmjF25.1720 | <i>L. major</i> | 43  | 481  | 523  |
| LmjF25.1720 | <i>L. major</i> | 42  | 716  | 757  |
| LmjF25.1720 | <i>L. major</i> | 53  | 1207 | 1259 |
| LmjF25.1720 | <i>L. major</i> | 111 | 1461 | 1571 |
| LmjF25.1730 | <i>L. major</i> | 87  | 36   | 122  |
| LmjF25.1740 | <i>L. major</i> | 106 | 1    | 106  |
| LmjF25.1740 | <i>L. major</i> | 125 | 183  | 307  |
| LmjF25.1760 | <i>L. major</i> | 147 | 15   | 161  |
| LmjF25.1760 | <i>L. major</i> | 89  | 251  | 339  |
| LmjF25.1770 | <i>L. major</i> | 42  | 38   | 79   |
| LmjF25.1780 | <i>L. major</i> | 112 | 1    | 112  |
| LmjF25.1780 | <i>L. major</i> | 137 | 132  | 268  |
| LmjF25.1780 | <i>L. major</i> | 223 | 335  | 557  |
| LmjF25.1780 | <i>L. major</i> | 94  | 1025 | 1118 |
| LmjF25.1800 | <i>L. major</i> | 94  | 94   | 187  |
| LmjF25.1800 | <i>L. major</i> | 86  | 228  | 313  |
| LmjF25.1800 | <i>L. major</i> | 122 | 414  | 535  |
| LmjF25.1800 | <i>L. major</i> | 44  | 751  | 794  |
| LmjF25.1800 | <i>L. major</i> | 73  | 920  | 992  |
| LmjF25.1810 | <i>L. major</i> | 47  | 1    | 47   |
| LmjF25.1820 | <i>L. major</i> | 66  | 1    | 66   |
| LmjF25.1820 | <i>L. major</i> | 732 | 100  | 831  |
| LmjF25.1830 | <i>L. major</i> | 44  | 1    | 44   |
| LmjF25.1830 | <i>L. major</i> | 128 | 75   | 202  |
| LmjF25.1830 | <i>L. major</i> | 173 | 279  | 451  |
| LmjF25.1830 | <i>L. major</i> | 414 | 583  | 996  |
| LmjF25.1840 | <i>L. major</i> | 151 | 11   | 161  |
| LmjF25.1840 | <i>L. major</i> | 324 | 183  | 506  |
| LmjF25.1850 | <i>L. major</i> | 139 | 1    | 139  |

|             |                 |     |     |      |
|-------------|-----------------|-----|-----|------|
| LmjF25.1850 | <i>L. major</i> | 68  | 159 | 226  |
| LmjF25.1860 | <i>L. major</i> | 61  | 14  | 74   |
| LmjF25.1870 | <i>L. major</i> | 63  | 54  | 116  |
| LmjF25.1870 | <i>L. major</i> | 170 | 192 | 361  |
| LmjF25.1890 | <i>L. major</i> | 61  | 1   | 61   |
| LmjF25.1900 | <i>L. major</i> | 54  | 1   | 54   |
| LmjF25.1910 | <i>L. major</i> | 47  | 62  | 108  |
| LmjF25.1910 | <i>L. major</i> | 85  | 135 | 219  |
| LmjF25.1910 | <i>L. major</i> | 44  | 251 | 294  |
| LmjF25.1920 | <i>L. major</i> | 121 | 1   | 121  |
| LmjF25.1920 | <i>L. major</i> | 45  | 358 | 402  |
| LmjF25.1940 | <i>L. major</i> | 59  | 395 | 453  |
| LmjF25.1950 | <i>L. major</i> | 79  | 317 | 395  |
| LmjF25.1950 | <i>L. major</i> | 249 | 471 | 719  |
| LmjF25.1950 | <i>L. major</i> | 72  | 755 | 826  |
| LmjF25.1950 | <i>L. major</i> | 191 | 872 | 1062 |
| LmjF25.1970 | <i>L. major</i> | 76  | 1   | 76   |
| LmjF25.1970 | <i>L. major</i> | 137 | 464 | 600  |
| LmjF25.1970 | <i>L. major</i> | 98  | 623 | 720  |
| LmjF25.1970 | <i>L. major</i> | 51  | 843 | 893  |
| LmjF25.1970 | <i>L. major</i> | 85  | 920 | 1004 |
| LmjF25.1980 | <i>L. major</i> | 76  | 1   | 76   |
| LmjF25.1980 | <i>L. major</i> | 693 | 790 | 1482 |
| LmjF25.1990 | <i>L. major</i> | 44  | 234 | 277  |
| LmjF25.1990 | <i>L. major</i> | 197 | 380 | 576  |
| LmjF25.2000 | <i>L. major</i> | 54  | 263 | 316  |
| LmjF25.2000 | <i>L. major</i> | 78  | 408 | 485  |
| LmjF25.2000 | <i>L. major</i> | 120 | 782 | 901  |
| LmjF25.2030 | <i>L. major</i> | 174 | 1   | 174  |
| LmjF25.2050 | <i>L. major</i> | 212 | 1   | 212  |
| LmjF25.2050 | <i>L. major</i> | 83  | 758 | 840  |
| LmjF25.2050 | <i>L. major</i> | 75  | 969 | 1043 |
| LmjF25.2060 | <i>L. major</i> | 80  | 1   | 80   |
| LmjF25.2070 | <i>L. major</i> | 95  | 133 | 227  |
| LmjF25.2070 | <i>L. major</i> | 53  | 432 | 484  |
| LmjF25.2070 | <i>L. major</i> | 53  | 432 | 484  |
| LmjF25.2095 | <i>L. major</i> | 113 | 1   | 113  |
| LmjF25.2100 | <i>L. major</i> | 92  | 262 | 353  |
| LmjF25.2110 | <i>L. major</i> | 40  | 326 | 365  |
| LmjF25.2120 | <i>L. major</i> | 105 | 1   | 105  |
| LmjF25.2120 | <i>L. major</i> | 59  | 153 | 211  |
| LmjF25.2130 | <i>L. major</i> | 46  | 243 | 288  |
| LmjF25.2140 | <i>L. major</i> | 46  | 243 | 288  |
| LmjF25.2150 | <i>L. major</i> | 59  | 346 | 404  |
| LmjF25.2155 | <i>L. major</i> | 83  | 50  | 132  |
| LmjF25.2155 | <i>L. major</i> | 54  | 164 | 217  |
| LmjF25.2155 | <i>L. major</i> | 54  | 164 | 217  |



|             |                 |     |     |     |
|-------------|-----------------|-----|-----|-----|
| LmjF25.2160 | <i>L. major</i> | 46  | 191 | 236 |
| LmjF25.2170 | <i>L. major</i> | 55  | 1   | 55  |
| LmjF25.2190 | <i>L. major</i> | 137 | 174 | 310 |
| LmjF25.2190 | <i>L. major</i> | 49  | 329 | 377 |
| LmjF25.2200 | <i>L. major</i> | 123 | 1   | 123 |
| LmjF25.2220 | <i>L. major</i> | 70  | 377 | 446 |
| LmjF25.2220 | <i>L. major</i> | 53  | 481 | 533 |
| LmjF25.2235 | <i>L. major</i> | 54  | 166 | 219 |
| LmjF25.2240 | <i>L. major</i> | 94  | 377 | 470 |
| LmjF25.2250 | <i>L. major</i> | 63  | 77  | 139 |
| LmjF25.2260 | <i>L. major</i> | 46  | 78  | 123 |
| LmjF25.2270 | <i>L. major</i> | 41  | 109 | 149 |
| LmjF25.2300 | <i>L. major</i> | 149 | 261 | 409 |
| LmjF25.2310 | <i>L. major</i> | 42  | 368 | 409 |
| LmjF25.2330 | <i>L. major</i> | 40  | 798 | 837 |
| LmjF25.2340 | <i>L. major</i> | 45  | 1   | 45  |
| LmjF25.2340 | <i>L. major</i> | 59  | 330 | 388 |
| LmjF25.2340 | <i>L. major</i> | 59  | 330 | 388 |
| LmjF25.2350 | <i>L. major</i> | 41  | 45  | 85  |
| LmjF25.2350 | <i>L. major</i> | 45  | 150 | 194 |
| LmjF25.2350 | <i>L. major</i> | 45  | 150 | 194 |
| LmjF25.2360 | <i>L. major</i> | 57  | 1   | 57  |
| LmjF25.2360 | <i>L. major</i> | 90  | 484 | 573 |
| LmjF25.2410 | <i>L. major</i> | 269 | 397 | 665 |
| LmjF25.2450 | <i>L. major</i> | 49  | 1   | 49  |
| LmjF25.2460 | <i>L. major</i> | 93  | 1   | 93  |
| LmjF25.2460 | <i>L. major</i> | 52  | 136 | 187 |
| LmjF26.0010 | <i>L. major</i> | 57  | 306 | 362 |
| LmjF26.0050 | <i>L. major</i> | 87  | 1   | 87  |
| LmjF26.0050 | <i>L. major</i> | 177 | 91  | 267 |
| LmjF26.0055 | <i>L. major</i> | 66  | 1   | 66  |
| LmjF26.0055 | <i>L. major</i> | 152 | 151 | 302 |
| LmjF26.0055 | <i>L. major</i> | 152 | 151 | 302 |
| LmjF26.0150 | <i>L. major</i> | 78  | 120 | 197 |
| LmjF26.0150 | <i>L. major</i> | 40  | 503 | 542 |
| LmjF26.0150 | <i>L. major</i> | 51  | 548 | 598 |
| LmjF26.0160 | <i>L. major</i> | 92  | 1   | 92  |
| LmjF26.0170 | <i>L. major</i> | 72  | 1   | 72  |
| LmjF26.0180 | <i>L. major</i> | 72  | 1   | 72  |
| LmjF26.0210 | <i>L. major</i> | 64  | 254 | 317 |
| LmjF26.0230 | <i>L. major</i> | 64  | 69  | 132 |
| LmjF26.0230 | <i>L. major</i> | 76  | 301 | 376 |
| LmjF26.0230 | <i>L. major</i> | 76  | 301 | 376 |
| LmjF26.0250 | <i>L. major</i> | 45  | 340 | 384 |
| LmjF26.0260 | <i>L. major</i> | 42  | 111 | 152 |
| LmjF26.0290 | <i>L. major</i> | 69  | 92  | 160 |
| LmjF26.0310 | <i>L. major</i> | 72  | 1   | 72  |

|             |                 |     |      |      |
|-------------|-----------------|-----|------|------|
| LmjF26.0350 | <i>L. major</i> | 94  | 588  | 681  |
| LmjF26.0360 | <i>L. major</i> | 60  | 14   | 73   |
| LmjF26.0360 | <i>L. major</i> | 50  | 184  | 233  |
| LmjF26.0360 | <i>L. major</i> | 44  | 648  | 691  |
| LmjF26.0360 | <i>L. major</i> | 42  | 782  | 823  |
| LmjF26.0360 | <i>L. major</i> | 85  | 917  | 1001 |
| LmjF26.0360 | <i>L. major</i> | 85  | 1161 | 1245 |
| LmjF26.0360 | <i>L. major</i> | 40  | 1247 | 1286 |
| LmjF26.0360 | <i>L. major</i> | 67  | 1490 | 1556 |
| LmjF26.0370 | <i>L. major</i> | 72  | 469  | 540  |
| LmjF26.0390 | <i>L. major</i> | 46  | 8    | 53   |
| LmjF26.0400 | <i>L. major</i> | 58  | 80   | 137  |
| LmjF26.0400 | <i>L. major</i> | 77  | 151  | 227  |
| LmjF26.0400 | <i>L. major</i> | 43  | 287  | 329  |
| LmjF26.0420 | <i>L. major</i> | 59  | 300  | 358  |
| LmjF26.0420 | <i>L. major</i> | 78  | 559  | 636  |
| LmjF26.0440 | <i>L. major</i> | 186 | 30   | 215  |
| LmjF26.0460 | <i>L. major</i> | 67  | 100  | 166  |
| LmjF26.0470 | <i>L. major</i> | 43  | 1    | 43   |
| LmjF26.0470 | <i>L. major</i> | 44  | 915  | 958  |
| LmjF26.0470 | <i>L. major</i> | 44  | 915  | 958  |
| LmjF26.0480 | <i>L. major</i> | 45  | 223  | 267  |
| LmjF26.0490 | <i>L. major</i> | 111 | 1    | 111  |
| LmjF26.0490 | <i>L. major</i> | 56  | 189  | 244  |
| LmjF26.0500 | <i>L. major</i> | 44  | 276  | 319  |
| LmjF26.0500 | <i>L. major</i> | 41  | 389  | 429  |
| LmjF26.0500 | <i>L. major</i> | 41  | 389  | 429  |
| LmjF26.0540 | <i>L. major</i> | 45  | 17   | 61   |
| LmjF26.0540 | <i>L. major</i> | 52  | 144  | 195  |
| LmjF26.0540 | <i>L. major</i> | 49  | 641  | 689  |
| LmjF26.0540 | <i>L. major</i> | 74  | 1030 | 1103 |
| LmjF26.0550 | <i>L. major</i> | 92  | 1    | 92   |
| LmjF26.0550 | <i>L. major</i> | 44  | 272  | 315  |
| LmjF26.0560 | <i>L. major</i> | 125 | 1    | 125  |
| LmjF26.0560 | <i>L. major</i> | 216 | 320  | 535  |
| LmjF26.0580 | <i>L. major</i> | 72  | 85   | 156  |
| LmjF26.0580 | <i>L. major</i> | 77  | 246  | 322  |
| LmjF26.0580 | <i>L. major</i> | 49  | 346  | 394  |
| LmjF26.0580 | <i>L. major</i> | 64  | 516  | 579  |
| LmjF26.0590 | <i>L. major</i> | 111 | 1    | 111  |
| LmjF26.0590 | <i>L. major</i> | 73  | 149  | 221  |
| LmjF26.0590 | <i>L. major</i> | 100 | 434  | 533  |
| LmjF26.0590 | <i>L. major</i> | 66  | 638  | 703  |
| LmjF26.0600 | <i>L. major</i> | 122 | 64   | 185  |
| LmjF26.0600 | <i>L. major</i> | 113 | 220  | 332  |
| LmjF26.0610 | <i>L. major</i> | 108 | 12   | 119  |
| LmjF26.0650 | <i>L. major</i> | 78  | 471  | 548  |

|             |                 |     |      |      |
|-------------|-----------------|-----|------|------|
| LmjF26.0650 | <i>L. major</i> | 65  | 1126 | 1190 |
| LmjF26.0650 | <i>L. major</i> | 65  | 1126 | 1190 |
| LmjF26.0660 | <i>L. major</i> | 68  | 294  | 361  |
| LmjF26.0690 | <i>L. major</i> | 110 | 85   | 194  |
| LmjF26.0700 | <i>L. major</i> | 241 | 1    | 241  |
| LmjF26.0700 | <i>L. major</i> | 46  | 261  | 306  |
| LmjF26.0700 | <i>L. major</i> | 42  | 446  | 487  |
| LmjF26.0710 | <i>L. major</i> | 143 | 1    | 143  |
| LmjF26.0710 | <i>L. major</i> | 48  | 466  | 513  |
| LmjF26.0710 | <i>L. major</i> | 49  | 588  | 636  |
| LmjF26.0710 | <i>L. major</i> | 48  | 747  | 794  |
| LmjF26.0720 | <i>L. major</i> | 74  | 60   | 133  |
| LmjF26.0720 | <i>L. major</i> | 165 | 167  | 331  |
| LmjF26.0720 | <i>L. major</i> | 140 | 468  | 607  |
| LmjF26.0720 | <i>L. major</i> | 73  | 861  | 933  |
| LmjF26.0720 | <i>L. major</i> | 78  | 1012 | 1089 |
| LmjF26.0730 | <i>L. major</i> | 73  | 1    | 73   |
| LmjF26.0730 | <i>L. major</i> | 197 | 93   | 289  |
| LmjF26.0730 | <i>L. major</i> | 338 | 294  | 631  |
| LmjF26.0730 | <i>L. major</i> | 186 | 661  | 846  |
| LmjF26.0730 | <i>L. major</i> | 113 | 867  | 979  |
| LmjF26.0730 | <i>L. major</i> | 78  | 1065 | 1142 |
| LmjF26.0730 | <i>L. major</i> | 199 | 1370 | 1568 |
| LmjF26.0730 | <i>L. major</i> | 141 | 1677 | 1817 |
| LmjF26.0730 | <i>L. major</i> | 42  | 1850 | 1891 |
| LmjF26.0750 | <i>L. major</i> | 57  | 180  | 236  |
| LmjF26.0750 | <i>L. major</i> | 136 | 426  | 561  |
| LmjF26.0750 | <i>L. major</i> | 401 | 1306 | 1706 |
| LmjF26.0770 | <i>L. major</i> | 433 | 99   | 531  |
| LmjF26.0840 | <i>L. major</i> | 40  | 1    | 40   |
| LmjF26.0840 | <i>L. major</i> | 295 | 115  | 409  |
| LmjF26.0840 | <i>L. major</i> | 123 | 595  | 717  |
| LmjF26.0840 | <i>L. major</i> | 45  | 841  | 885  |
| LmjF26.0850 | <i>L. major</i> | 57  | 248  | 304  |
| LmjF26.0860 | <i>L. major</i> | 50  | 340  | 389  |
| LmjF26.0860 | <i>L. major</i> | 72  | 606  | 677  |
| LmjF26.0860 | <i>L. major</i> | 72  | 606  | 677  |
| LmjF26.0870 | <i>L. major</i> | 49  | 87   | 135  |
| LmjF26.0870 | <i>L. major</i> | 415 | 165  | 579  |
| LmjF26.0870 | <i>L. major</i> | 101 | 599  | 699  |
| LmjF26.0870 | <i>L. major</i> | 90  | 718  | 807  |
| LmjF26.0900 | <i>L. major</i> | 92  | 1    | 92   |
| LmjF26.0900 | <i>L. major</i> | 55  | 276  | 330  |
| LmjF26.0900 | <i>L. major</i> | 142 | 710  | 851  |
| LmjF26.0900 | <i>L. major</i> | 45  | 900  | 944  |
| LmjF26.0910 | <i>L. major</i> | 47  | 57   | 103  |
| LmjF26.0910 | <i>L. major</i> | 44  | 162  | 205  |

|             |                 |     |      |      |
|-------------|-----------------|-----|------|------|
| LmjF26.0910 | <i>L. major</i> | 40  | 275  | 314  |
| LmjF26.0930 | <i>L. major</i> | 143 | 235  | 377  |
| LmjF26.0940 | <i>L. major</i> | 41  | 1    | 41   |
| LmjF26.0940 | <i>L. major</i> | 134 | 146  | 279  |
| LmjF26.0940 | <i>L. major</i> | 98  | 305  | 402  |
| LmjF26.0950 | <i>L. major</i> | 380 | 1    | 380  |
| LmjF26.0960 | <i>L. major</i> | 48  | 45   | 92   |
| LmjF26.0960 | <i>L. major</i> | 121 | 103  | 223  |
| LmjF26.0960 | <i>L. major</i> | 52  | 968  | 1019 |
| LmjF26.0960 | <i>L. major</i> | 58  | 1064 | 1121 |
| LmjF26.0960 | <i>L. major</i> | 56  | 1346 | 1401 |
| LmjF26.0960 | <i>L. major</i> | 45  | 1442 | 1486 |
| LmjF26.0960 | <i>L. major</i> | 50  | 1611 | 1660 |
| LmjF26.0970 | <i>L. major</i> | 126 | 438  | 563  |
| LmjF26.0980 | <i>L. major</i> | 836 | 1    | 836  |
| LmjF26.0990 | <i>L. major</i> | 117 | 474  | 590  |
| LmjF26.1000 | <i>L. major</i> | 73  | 1    | 73   |
| LmjF26.1000 | <i>L. major</i> | 75  | 77   | 151  |
| LmjF26.1000 | <i>L. major</i> | 54  | 166  | 219  |
| LmjF26.1010 | <i>L. major</i> | 63  | 279  | 341  |
| LmjF26.1010 | <i>L. major</i> | 42  | 369  | 410  |
| LmjF26.1010 | <i>L. major</i> | 42  | 369  | 410  |
| LmjF26.1020 | <i>L. major</i> | 47  | 1    | 47   |
| LmjF26.1020 | <i>L. major</i> | 58  | 581  | 638  |
| LmjF26.1020 | <i>L. major</i> | 44  | 1832 | 1875 |
| LmjF26.1020 | <i>L. major</i> | 68  | 2633 | 2700 |
| LmjF26.1020 | <i>L. major</i> | 40  | 3167 | 3206 |
| LmjF26.1030 | <i>L. major</i> | 110 | 31   | 140  |
| LmjF26.1030 | <i>L. major</i> | 83  | 697  | 779  |
| LmjF26.1040 | <i>L. major</i> | 45  | 164  | 208  |
| LmjF26.1060 | <i>L. major</i> | 217 | 114  | 330  |
| LmjF26.1070 | <i>L. major</i> | 76  | 1    | 76   |
| LmjF26.1070 | <i>L. major</i> | 128 | 87   | 214  |
| LmjF26.1070 | <i>L. major</i> | 51  | 411  | 461  |
| LmjF26.1080 | <i>L. major</i> | 78  | 1    | 78   |
| LmjF26.1080 | <i>L. major</i> | 116 | 80   | 195  |
| LmjF26.1080 | <i>L. major</i> | 291 | 261  | 551  |
| LmjF26.1080 | <i>L. major</i> | 248 | 571  | 818  |
| LmjF26.1080 | <i>L. major</i> | 53  | 849  | 901  |
| LmjF26.1080 | <i>L. major</i> | 143 | 918  | 1060 |
| LmjF26.1080 | <i>L. major</i> | 47  | 1124 | 1170 |
| LmjF26.1080 | <i>L. major</i> | 48  | 1309 | 1356 |
| LmjF26.1080 | <i>L. major</i> | 61  | 1402 | 1462 |
| LmjF26.1080 | <i>L. major</i> | 98  | 1514 | 1611 |
| LmjF26.1090 | <i>L. major</i> | 112 | 1    | 112  |
| LmjF26.1110 | <i>L. major</i> | 41  | 31   | 71   |
| LmjF26.1110 | <i>L. major</i> | 75  | 165  | 239  |

|             |                 |     |      |      |
|-------------|-----------------|-----|------|------|
| LmjF26.1110 | <i>L. major</i> | 47  | 263  | 309  |
| LmjF26.1110 | <i>L. major</i> | 45  | 528  | 572  |
| LmjF26.1110 | <i>L. major</i> | 86  | 687  | 772  |
| LmjF26.1110 | <i>L. major</i> | 46  | 856  | 901  |
| LmjF26.1110 | <i>L. major</i> | 146 | 1002 | 1147 |
| LmjF26.1110 | <i>L. major</i> | 63  | 1174 | 1236 |
| LmjF26.1110 | <i>L. major</i> | 93  | 1452 | 1544 |
| LmjF26.1110 | <i>L. major</i> | 57  | 1576 | 1632 |
| LmjF26.1110 | <i>L. major</i> | 103 | 1670 | 1772 |
| LmjF26.1110 | <i>L. major</i> | 45  | 2331 | 2375 |
| LmjF26.1110 | <i>L. major</i> | 90  | 2414 | 2503 |
| LmjF26.1110 | <i>L. major</i> | 48  | 2704 | 2751 |
| LmjF26.1110 | <i>L. major</i> | 63  | 3074 | 3136 |
| LmjF26.1110 | <i>L. major</i> | 142 | 3191 | 3332 |
| LmjF26.1110 | <i>L. major</i> | 59  | 3424 | 3482 |
| LmjF26.1110 | <i>L. major</i> | 44  | 3541 | 3584 |
| LmjF26.1110 | <i>L. major</i> | 52  | 3599 | 3650 |
| LmjF26.1110 | <i>L. major</i> | 76  | 3783 | 3858 |
| LmjF26.1110 | <i>L. major</i> | 68  | 3882 | 3949 |
| LmjF26.1110 | <i>L. major</i> | 87  | 3960 | 4046 |
| LmjF26.1110 | <i>L. major</i> | 43  | 4049 | 4091 |
| LmjF26.1120 | <i>L. major</i> | 83  | 68   | 150  |
| LmjF26.1120 | <i>L. major</i> | 95  | 192  | 286  |
| LmjF26.1120 | <i>L. major</i> | 71  | 396  | 466  |
| LmjF26.1130 | <i>L. major</i> | 256 | 1    | 256  |
| LmjF26.1130 | <i>L. major</i> | 133 | 288  | 420  |
| LmjF26.1130 | <i>L. major</i> | 230 | 557  | 786  |
| LmjF26.1130 | <i>L. major</i> | 441 | 798  | 1238 |
| LmjF26.1130 | <i>L. major</i> | 200 | 1246 | 1445 |
| LmjF26.1130 | <i>L. major</i> | 138 | 1523 | 1660 |
| LmjF26.1140 | <i>L. major</i> | 96  | 17   | 112  |
| LmjF26.1140 | <i>L. major</i> | 42  | 126  | 167  |
| LmjF26.1140 | <i>L. major</i> | 42  | 126  | 167  |
| LmjF26.1150 | <i>L. major</i> | 46  | 139  | 184  |
| LmjF26.1150 | <i>L. major</i> | 52  | 239  | 290  |
| LmjF26.1150 | <i>L. major</i> | 141 | 509  | 649  |
| LmjF26.1160 | <i>L. major</i> | 75  | 123  | 197  |
| LmjF26.1160 | <i>L. major</i> | 80  | 288  | 367  |
| LmjF26.1160 | <i>L. major</i> | 139 | 398  | 536  |
| LmjF26.1160 | <i>L. major</i> | 58  | 670  | 727  |
| LmjF26.1160 | <i>L. major</i> | 91  | 756  | 846  |
| LmjF26.1160 | <i>L. major</i> | 60  | 900  | 959  |
| LmjF26.1170 | <i>L. major</i> | 133 | 16   | 148  |
| LmjF26.1170 | <i>L. major</i> | 122 | 223  | 344  |
| LmjF26.1170 | <i>L. major</i> | 153 | 369  | 521  |
| LmjF26.1180 | <i>L. major</i> | 54  | 1    | 54   |
| LmjF26.1180 | <i>L. major</i> | 54  | 90   | 143  |

|             |                 |     |      |      |
|-------------|-----------------|-----|------|------|
| LmjF26.1180 | <i>L. major</i> | 54  | 161  | 214  |
| LmjF26.1180 | <i>L. major</i> | 59  | 239  | 297  |
| LmjF26.1180 | <i>L. major</i> | 70  | 391  | 460  |
| LmjF26.1180 | <i>L. major</i> | 44  | 563  | 606  |
| LmjF26.1190 | <i>L. major</i> | 605 | 26   | 630  |
| LmjF26.1190 | <i>L. major</i> | 57  | 652  | 708  |
| LmjF26.1190 | <i>L. major</i> | 424 | 914  | 1337 |
| LmjF26.1190 | <i>L. major</i> | 53  | 1371 | 1423 |
| LmjF26.1190 | <i>L. major</i> | 138 | 1507 | 1644 |
| LmjF26.1190 | <i>L. major</i> | 85  | 1652 | 1736 |
| LmjF26.1200 | <i>L. major</i> | 71  | 27   | 97   |
| LmjF26.1200 | <i>L. major</i> | 41  | 241  | 281  |
| LmjF26.1200 | <i>L. major</i> | 49  | 310  | 358  |
| LmjF26.1210 | <i>L. major</i> | 54  | 183  | 236  |
| LmjF26.1220 | <i>L. major</i> | 63  | 116  | 178  |
| LmjF26.1220 | <i>L. major</i> | 139 | 232  | 370  |
| LmjF26.1220 | <i>L. major</i> | 42  | 463  | 504  |
| LmjF26.1220 | <i>L. major</i> | 151 | 520  | 670  |
| LmjF26.1230 | <i>L. major</i> | 94  | 1    | 94   |
| LmjF26.1230 | <i>L. major</i> | 50  | 273  | 322  |
| LmjF26.1230 | <i>L. major</i> | 175 | 435  | 609  |
| LmjF26.1230 | <i>L. major</i> | 104 | 614  | 717  |
| LmjF26.1230 | <i>L. major</i> | 46  | 809  | 854  |
| LmjF26.1230 | <i>L. major</i> | 91  | 904  | 994  |
| LmjF26.1230 | <i>L. major</i> | 89  | 1032 | 1120 |
| LmjF26.1230 | <i>L. major</i> | 88  | 1207 | 1294 |
| LmjF26.1230 | <i>L. major</i> | 60  | 1402 | 1461 |
| LmjF26.1230 | <i>L. major</i> | 399 | 1666 | 2064 |
| LmjF26.1230 | <i>L. major</i> | 158 | 2082 | 2239 |
| LmjF26.1230 | <i>L. major</i> | 185 | 2261 | 2445 |
| LmjF26.1230 | <i>L. major</i> | 64  | 2466 | 2529 |
| LmjF26.1230 | <i>L. major</i> | 111 | 2649 | 2759 |
| LmjF26.1230 | <i>L. major</i> | 67  | 2877 | 2943 |
| LmjF26.1240 | <i>L. major</i> | 105 | 495  | 599  |
| LmjF26.1250 | <i>L. major</i> | 208 | 450  | 657  |
| LmjF26.1260 | <i>L. major</i> | 202 | 143  | 344  |
| LmjF26.1260 | <i>L. major</i> | 131 | 358  | 488  |
| LmjF26.1260 | <i>L. major</i> | 74  | 511  | 584  |
| LmjF26.1260 | <i>L. major</i> | 45  | 618  | 662  |
| LmjF26.1260 | <i>L. major</i> | 97  | 912  | 1008 |
| LmjF26.1260 | <i>L. major</i> | 121 | 1041 | 1161 |
| LmjF26.1260 | <i>L. major</i> | 64  | 1204 | 1267 |
| LmjF26.1270 | <i>L. major</i> | 60  | 1    | 60   |
| LmjF26.1270 | <i>L. major</i> | 56  | 84   | 139  |
| LmjF26.1270 | <i>L. major</i> | 61  | 333  | 393  |
| LmjF26.1270 | <i>L. major</i> | 41  | 424  | 464  |
| LmjF26.1270 | <i>L. major</i> | 128 | 553  | 680  |

|             |                 |     |      |      |
|-------------|-----------------|-----|------|------|
| LmjF26.1280 | <i>L. major</i> | 254 | 51   | 304  |
| LmjF26.1280 | <i>L. major</i> | 43  | 423  | 465  |
| LmjF26.1280 | <i>L. major</i> | 43  | 509  | 551  |
| LmjF26.1280 | <i>L. major</i> | 75  | 690  | 764  |
| LmjF26.1280 | <i>L. major</i> | 162 | 852  | 1013 |
| LmjF26.1290 | <i>L. major</i> | 59  | 44   | 102  |
| LmjF26.1290 | <i>L. major</i> | 69  | 146  | 214  |
| LmjF26.1290 | <i>L. major</i> | 51  | 453  | 503  |
| LmjF26.1300 | <i>L. major</i> | 60  | 181  | 240  |
| LmjF26.1300 | <i>L. major</i> | 85  | 245  | 329  |
| LmjF26.1300 | <i>L. major</i> | 90  | 407  | 496  |
| LmjF26.1300 | <i>L. major</i> | 64  | 584  | 647  |
| LmjF26.1300 | <i>L. major</i> | 50  | 726  | 775  |
| LmjF26.1300 | <i>L. major</i> | 324 | 867  | 1190 |
| LmjF26.1310 | <i>L. major</i> | 49  | 106  | 154  |
| LmjF26.1320 | <i>L. major</i> | 40  | 14   | 53   |
| LmjF26.1320 | <i>L. major</i> | 48  | 231  | 278  |
| LmjF26.1320 | <i>L. major</i> | 48  | 231  | 278  |
| LmjF26.1330 | <i>L. major</i> | 112 | 219  | 330  |
| LmjF26.1340 | <i>L. major</i> | 61  | 1    | 61   |
| LmjF26.1340 | <i>L. major</i> | 81  | 108  | 188  |
| LmjF26.1340 | <i>L. major</i> | 51  | 477  | 527  |
| LmjF26.1360 | <i>L. major</i> | 52  | 29   | 80   |
| LmjF26.1360 | <i>L. major</i> | 59  | 137  | 195  |
| LmjF26.1360 | <i>L. major</i> | 59  | 137  | 195  |
| LmjF26.1370 | <i>L. major</i> | 129 | 1    | 129  |
| LmjF26.1370 | <i>L. major</i> | 84  | 270  | 353  |
| LmjF26.1370 | <i>L. major</i> | 101 | 469  | 569  |
| LmjF26.1370 | <i>L. major</i> | 92  | 617  | 708  |
| LmjF26.1390 | <i>L. major</i> | 210 | 1    | 210  |
| LmjF26.1390 | <i>L. major</i> | 115 | 275  | 389  |
| LmjF26.1390 | <i>L. major</i> | 125 | 412  | 536  |
| LmjF26.1390 | <i>L. major</i> | 139 | 576  | 714  |
| LmjF26.1390 | <i>L. major</i> | 63  | 725  | 787  |
| LmjF26.1390 | <i>L. major</i> | 60  | 895  | 954  |
| LmjF26.1390 | <i>L. major</i> | 50  | 1031 | 1080 |
| LmjF26.1400 | <i>L. major</i> | 65  | 1    | 65   |
| LmjF26.1400 | <i>L. major</i> | 43  | 215  | 257  |
| LmjF26.1410 | <i>L. major</i> | 64  | 134  | 197  |
| LmjF26.1410 | <i>L. major</i> | 73  | 325  | 397  |
| LmjF26.1410 | <i>L. major</i> | 73  | 325  | 397  |
| LmjF26.1420 | <i>L. major</i> | 62  | 404  | 465  |
| LmjF26.1420 | <i>L. major</i> | 56  | 594  | 649  |
| LmjF26.1420 | <i>L. major</i> | 63  | 689  | 751  |
| LmjF26.1420 | <i>L. major</i> | 52  | 837  | 888  |
| LmjF26.1420 | <i>L. major</i> | 90  | 964  | 1053 |
| LmjF26.1420 | <i>L. major</i> | 77  | 1132 | 1208 |

|             |                 |     |      |      |
|-------------|-----------------|-----|------|------|
| LmjF26.1420 | <i>L. major</i> | 188 | 1317 | 1504 |
| LmjF26.1420 | <i>L. major</i> | 66  | 1875 | 1940 |
| LmjF26.1420 | <i>L. major</i> | 235 | 2018 | 2252 |
| LmjF26.1420 | <i>L. major</i> | 115 | 2269 | 2383 |
| LmjF26.1430 | <i>L. major</i> | 171 | 1    | 171  |
| LmjF26.1430 | <i>L. major</i> | 782 | 191  | 972  |
| LmjF26.1430 | <i>L. major</i> | 76  | 977  | 1052 |
| LmjF26.1440 | <i>L. major</i> | 138 | 69   | 206  |
| LmjF26.1440 | <i>L. major</i> | 117 | 306  | 422  |
| LmjF26.1440 | <i>L. major</i> | 72  | 621  | 692  |
| LmjF26.1450 | <i>L. major</i> | 256 | 1    | 256  |
| LmjF26.1450 | <i>L. major</i> | 68  | 412  | 479  |
| LmjF26.1450 | <i>L. major</i> | 313 | 508  | 820  |
| LmjF26.1450 | <i>L. major</i> | 63  | 942  | 1004 |
| LmjF26.1450 | <i>L. major</i> | 64  | 1010 | 1073 |
| LmjF26.1460 | <i>L. major</i> | 57  | 279  | 335  |
| LmjF26.1470 | <i>L. major</i> | 56  | 33   | 88   |
| LmjF26.1470 | <i>L. major</i> | 74  | 172  | 245  |
| LmjF26.1480 | <i>L. major</i> | 41  | 1    | 41   |
| LmjF26.1480 | <i>L. major</i> | 67  | 80   | 146  |
| LmjF26.1480 | <i>L. major</i> | 92  | 196  | 287  |
| LmjF26.1480 | <i>L. major</i> | 71  | 429  | 499  |
| LmjF26.1480 | <i>L. major</i> | 80  | 798  | 877  |
| LmjF26.1490 | <i>L. major</i> | 49  | 398  | 446  |
| LmjF26.1500 | <i>L. major</i> | 136 | 1    | 136  |
| LmjF26.1510 | <i>L. major</i> | 254 | 1    | 254  |
| LmjF26.1510 | <i>L. major</i> | 188 | 270  | 457  |
| LmjF26.1510 | <i>L. major</i> | 393 | 491  | 883  |
| LmjF26.1510 | <i>L. major</i> | 232 | 1003 | 1234 |
| LmjF26.1510 | <i>L. major</i> | 55  | 1259 | 1313 |
| LmjF26.1510 | <i>L. major</i> | 67  | 1341 | 1407 |
| LmjF26.1510 | <i>L. major</i> | 59  | 1457 | 1515 |
| LmjF26.1520 | <i>L. major</i> | 43  | 159  | 201  |
| LmjF26.1530 | <i>L. major</i> | 98  | 1    | 98   |
| LmjF26.1560 | <i>L. major</i> | 44  | 880  | 923  |
| LmjF26.1560 | <i>L. major</i> | 44  | 1471 | 1514 |
| LmjF26.1560 | <i>L. major</i> | 48  | 1579 | 1626 |
| LmjF26.1580 | <i>L. major</i> | 42  | 1    | 42   |
| LmjF26.1590 | <i>L. major</i> | 112 | 15   | 126  |
| LmjF26.1590 | <i>L. major</i> | 86  | 195  | 280  |
| LmjF26.1590 | <i>L. major</i> | 86  | 195  | 280  |
| LmjF26.1600 | <i>L. major</i> | 159 | 475  | 633  |
| LmjF26.1620 | <i>L. major</i> | 59  | 1    | 59   |
| LmjF26.1660 | <i>L. major</i> | 78  | 1    | 78   |
| LmjF26.1665 | <i>L. major</i> | 61  | 203  | 263  |
| LmjF26.1700 | <i>L. major</i> | 47  | 290  | 336  |
| LmjF26.1720 | <i>L. major</i> | 99  | 32   | 130  |



|             |                 |     |      |      |
|-------------|-----------------|-----|------|------|
| LmjF26.1720 | <i>L. major</i> | 117 | 360  | 476  |
| LmjF26.1720 | <i>L. major</i> | 186 | 521  | 706  |
| LmjF26.1740 | <i>L. major</i> | 103 | 26   | 128  |
| LmjF26.1740 | <i>L. major</i> | 45  | 285  | 329  |
| LmjF26.1750 | <i>L. major</i> | 64  | 73   | 136  |
| LmjF26.1755 | <i>L. major</i> | 173 | 1    | 173  |
| LmjF26.1755 | <i>L. major</i> | 45  | 233  | 277  |
| LmjF26.1760 | <i>L. major</i> | 64  | 1    | 64   |
| LmjF26.1760 | <i>L. major</i> | 107 | 93   | 199  |
| LmjF26.1760 | <i>L. major</i> | 142 | 252  | 393  |
| LmjF26.1760 | <i>L. major</i> | 58  | 429  | 486  |
| LmjF26.1760 | <i>L. major</i> | 46  | 529  | 574  |
| LmjF26.1780 | <i>L. major</i> | 62  | 151  | 212  |
| LmjF26.1785 | <i>L. major</i> | 45  | 1    | 45   |
| LmjF26.1785 | <i>L. major</i> | 55  | 144  | 198  |
| LmjF26.1785 | <i>L. major</i> | 105 | 225  | 329  |
| LmjF26.1790 | <i>L. major</i> | 40  | 1    | 40   |
| LmjF26.1790 | <i>L. major</i> | 69  | 753  | 821  |
| LmjF26.1790 | <i>L. major</i> | 47  | 904  | 950  |
| LmjF26.1790 | <i>L. major</i> | 45  | 1122 | 1166 |
| LmjF26.1790 | <i>L. major</i> | 97  | 1437 | 1533 |
| LmjF26.1790 | <i>L. major</i> | 54  | 1690 | 1743 |
| LmjF26.1790 | <i>L. major</i> | 76  | 1884 | 1959 |
| LmjF26.1800 | <i>L. major</i> | 52  | 1    | 52   |
| LmjF26.1810 | <i>L. major</i> | 52  | 1    | 52   |
| LmjF26.1810 | <i>L. major</i> | 52  | 85   | 136  |
| LmjF26.1810 | <i>L. major</i> | 237 | 172  | 408  |
| LmjF26.1820 | <i>L. major</i> | 511 | 1    | 511  |
| LmjF26.1820 | <i>L. major</i> | 455 | 517  | 971  |
| LmjF26.1820 | <i>L. major</i> | 304 | 984  | 1287 |
| LmjF26.1820 | <i>L. major</i> | 168 | 1317 | 1484 |
| LmjF26.1820 | <i>L. major</i> | 74  | 1535 | 1608 |
| LmjF26.1820 | <i>L. major</i> | 62  | 1682 | 1743 |
| LmjF26.1820 | <i>L. major</i> | 54  | 1885 | 1938 |
| LmjF26.1820 | <i>L. major</i> | 49  | 2017 | 2065 |
| LmjF26.1820 | <i>L. major</i> | 98  | 2096 | 2193 |
| LmjF26.1820 | <i>L. major</i> | 51  | 2220 | 2270 |
| LmjF26.1830 | <i>L. major</i> | 295 | 16   | 310  |
| LmjF26.1830 | <i>L. major</i> | 229 | 525  | 753  |
| LmjF26.1840 | <i>L. major</i> | 134 | 39   | 172  |
| LmjF26.1840 | <i>L. major</i> | 173 | 234  | 406  |
| LmjF26.1840 | <i>L. major</i> | 46  | 430  | 475  |
| LmjF26.1840 | <i>L. major</i> | 62  | 539  | 600  |
| LmjF26.1840 | <i>L. major</i> | 52  | 678  | 729  |
| LmjF26.1840 | <i>L. major</i> | 76  | 786  | 861  |
| LmjF26.1860 | <i>L. major</i> | 47  | 1    | 47   |
| LmjF26.1860 | <i>L. major</i> | 142 | 88   | 229  |

|             |                 |     |      |      |
|-------------|-----------------|-----|------|------|
| LmjF26.1860 | <i>L. major</i> | 58  | 467  | 524  |
| LmjF26.1870 | <i>L. major</i> | 113 | 1    | 113  |
| LmjF26.1870 | <i>L. major</i> | 49  | 208  | 256  |
| LmjF26.1870 | <i>L. major</i> | 59  | 331  | 389  |
| LmjF26.1870 | <i>L. major</i> | 53  | 435  | 487  |
| LmjF26.1870 | <i>L. major</i> | 71  | 792  | 862  |
| LmjF26.1870 | <i>L. major</i> | 267 | 887  | 1153 |
| LmjF26.1870 | <i>L. major</i> | 84  | 1180 | 1263 |
| LmjF26.1870 | <i>L. major</i> | 89  | 1437 | 1525 |
| LmjF26.1870 | <i>L. major</i> | 223 | 1531 | 1753 |
| LmjF26.1870 | <i>L. major</i> | 47  | 1797 | 1843 |
| LmjF26.1870 | <i>L. major</i> | 388 | 1985 | 2372 |
| LmjF26.1870 | <i>L. major</i> | 78  | 2456 | 2533 |
| LmjF26.1870 | <i>L. major</i> | 41  | 2589 | 2629 |
| LmjF26.1880 | <i>L. major</i> | 74  | 66   | 139  |
| LmjF26.1880 | <i>L. major</i> | 57  | 180  | 236  |
| LmjF26.1880 | <i>L. major</i> | 117 | 526  | 642  |
| LmjF26.1890 | <i>L. major</i> | 65  | 69   | 133  |
| LmjF26.1890 | <i>L. major</i> | 79  | 212  | 290  |
| LmjF26.1900 | <i>L. major</i> | 72  | 140  | 211  |
| LmjF26.1900 | <i>L. major</i> | 47  | 501  | 547  |
| LmjF26.1900 | <i>L. major</i> | 68  | 1057 | 1124 |
| LmjF26.1910 | <i>L. major</i> | 69  | 115  | 183  |
| LmjF26.1930 | <i>L. major</i> | 448 | 1    | 448  |
| LmjF26.1930 | <i>L. major</i> | 112 | 460  | 571  |
| LmjF26.1930 | <i>L. major</i> | 46  | 823  | 868  |
| LmjF26.1930 | <i>L. major</i> | 191 | 883  | 1073 |
| LmjF26.1930 | <i>L. major</i> | 82  | 1124 | 1205 |
| LmjF26.1930 | <i>L. major</i> | 131 | 1327 | 1457 |
| LmjF26.1930 | <i>L. major</i> | 73  | 1586 | 1658 |
| LmjF26.1930 | <i>L. major</i> | 56  | 1713 | 1768 |
| LmjF26.1940 | <i>L. major</i> | 66  | 291  | 356  |
| LmjF26.1950 | <i>L. major</i> | 58  | 81   | 138  |
| LmjF26.1950 | <i>L. major</i> | 94  | 241  | 334  |
| LmjF26.1950 | <i>L. major</i> | 81  | 383  | 463  |
| LmjF26.1950 | <i>L. major</i> | 127 | 526  | 652  |
| LmjF26.1950 | <i>L. major</i> | 44  | 1087 | 1130 |
| LmjF26.1950 | <i>L. major</i> | 49  | 1786 | 1834 |
| LmjF26.1950 | <i>L. major</i> | 69  | 2547 | 2615 |
| LmjF26.1960 | <i>L. major</i> | 75  | 82   | 156  |
| LmjF26.1960 | <i>L. major</i> | 70  | 413  | 482  |
| LmjF26.1960 | <i>L. major</i> | 105 | 703  | 807  |
| LmjF26.1970 | <i>L. major</i> | 67  | 220  | 286  |
| LmjF26.1980 | <i>L. major</i> | 119 | 1    | 119  |
| LmjF26.1990 | <i>L. major</i> | 40  | 1    | 40   |
| LmjF26.1990 | <i>L. major</i> | 100 | 113  | 212  |
| LmjF26.2000 | <i>L. major</i> | 41  | 56   | 96   |

|             |                 |     |      |      |
|-------------|-----------------|-----|------|------|
| LmjF26.2010 | <i>L. major</i> | 123 | 169  | 291  |
| LmjF26.2010 | <i>L. major</i> | 397 | 331  | 727  |
| LmjF26.2030 | <i>L. major</i> | 80  | 117  | 196  |
| LmjF26.2030 | <i>L. major</i> | 47  | 486  | 532  |
| LmjF26.2030 | <i>L. major</i> | 47  | 486  | 532  |
| LmjF26.2040 | <i>L. major</i> | 70  | 110  | 179  |
| LmjF26.2050 | <i>L. major</i> | 50  | 108  | 157  |
| LmjF26.2050 | <i>L. major</i> | 101 | 242  | 342  |
| LmjF26.2050 | <i>L. major</i> | 45  | 347  | 391  |
| LmjF26.2050 | <i>L. major</i> | 72  | 449  | 520  |
| LmjF26.2050 | <i>L. major</i> | 59  | 633  | 691  |
| LmjF26.2050 | <i>L. major</i> | 138 | 751  | 888  |
| LmjF26.2060 | <i>L. major</i> | 42  | 1    | 42   |
| LmjF26.2060 | <i>L. major</i> | 48  | 99   | 146  |
| LmjF26.2060 | <i>L. major</i> | 70  | 182  | 251  |
| LmjF26.2060 | <i>L. major</i> | 71  | 327  | 397  |
| LmjF26.2060 | <i>L. major</i> | 156 | 487  | 642  |
| LmjF26.2060 | <i>L. major</i> | 41  | 662  | 702  |
| LmjF26.2060 | <i>L. major</i> | 43  | 724  | 766  |
| LmjF26.2060 | <i>L. major</i> | 60  | 807  | 866  |
| LmjF26.2070 | <i>L. major</i> | 538 | 1    | 538  |
| LmjF26.2070 | <i>L. major</i> | 206 | 564  | 769  |
| LmjF26.2070 | <i>L. major</i> | 50  | 1028 | 1077 |
| LmjF26.2070 | <i>L. major</i> | 47  | 1226 | 1272 |
| LmjF26.2080 | <i>L. major</i> | 122 | 1    | 122  |
| LmjF26.2080 | <i>L. major</i> | 145 | 152  | 296  |
| LmjF26.2100 | <i>L. major</i> | 96  | 55   | 150  |
| LmjF26.2100 | <i>L. major</i> | 168 | 173  | 340  |
| LmjF26.2100 | <i>L. major</i> | 113 | 567  | 679  |
| LmjF26.2100 | <i>L. major</i> | 135 | 723  | 857  |
| LmjF26.2100 | <i>L. major</i> | 47  | 872  | 918  |
| LmjF26.2110 | <i>L. major</i> | 44  | 1    | 44   |
| LmjF26.2110 | <i>L. major</i> | 220 | 99   | 318  |
| LmjF26.2110 | <i>L. major</i> | 63  | 424  | 486  |
| LmjF26.2110 | <i>L. major</i> | 117 | 499  | 615  |
| LmjF26.2110 | <i>L. major</i> | 142 | 668  | 809  |
| LmjF26.2110 | <i>L. major</i> | 309 | 978  | 1286 |
| LmjF26.2110 | <i>L. major</i> | 343 | 1417 | 1759 |
| LmjF26.2120 | <i>L. major</i> | 222 | 1    | 222  |
| LmjF26.2120 | <i>L. major</i> | 142 | 253  | 394  |
| LmjF26.2120 | <i>L. major</i> | 179 | 417  | 595  |
| LmjF26.2120 | <i>L. major</i> | 226 | 639  | 864  |
| LmjF26.2120 | <i>L. major</i> | 41  | 868  | 908  |
| LmjF26.2120 | <i>L. major</i> | 47  | 958  | 1004 |
| LmjF26.2120 | <i>L. major</i> | 573 | 1094 | 1666 |
| LmjF26.2120 | <i>L. major</i> | 63  | 1696 | 1758 |
| LmjF26.2120 | <i>L. major</i> | 361 | 1780 | 2140 |

|             |                 |      |      |      |
|-------------|-----------------|------|------|------|
| LmjF26.2120 | <i>L. major</i> | 91   | 2154 | 2244 |
| LmjF26.2120 | <i>L. major</i> | 410  | 2333 | 2742 |
| LmjF26.2120 | <i>L. major</i> | 94   | 2775 | 2868 |
| LmjF26.2120 | <i>L. major</i> | 179  | 2902 | 3080 |
| LmjF26.2120 | <i>L. major</i> | 62   | 3172 | 3233 |
| LmjF26.2120 | <i>L. major</i> | 139  | 3268 | 3406 |
| LmjF26.2120 | <i>L. major</i> | 141  | 3440 | 3580 |
| LmjF26.2120 | <i>L. major</i> | 198  | 3624 | 3821 |
| LmjF26.2120 | <i>L. major</i> | 158  | 3850 | 4007 |
| LmjF26.2120 | <i>L. major</i> | 69   | 4069 | 4137 |
| LmjF26.2130 | <i>L. major</i> | 44   | 1    | 44   |
| LmjF26.2130 | <i>L. major</i> | 53   | 157  | 209  |
| LmjF26.2150 | <i>L. major</i> | 55   | 45   | 99   |
| LmjF26.2150 | <i>L. major</i> | 51   | 285  | 335  |
| LmjF26.2150 | <i>L. major</i> | 51   | 285  | 335  |
| LmjF26.2160 | <i>L. major</i> | 424  | 23   | 446  |
| LmjF26.2160 | <i>L. major</i> | 219  | 618  | 836  |
| LmjF26.2160 | <i>L. major</i> | 558  | 844  | 1401 |
| LmjF26.2160 | <i>L. major</i> | 282  | 1419 | 1700 |
| LmjF26.2160 | <i>L. major</i> | 118  | 1766 | 1883 |
| LmjF26.2160 | <i>L. major</i> | 194  | 1937 | 2130 |
| LmjF26.2170 | <i>L. major</i> | 93   | 1    | 93   |
| LmjF26.2170 | <i>L. major</i> | 95   | 186  | 280  |
| LmjF26.2170 | <i>L. major</i> | 63   | 302  | 364  |
| LmjF26.2170 | <i>L. major</i> | 93   | 377  | 469  |
| LmjF26.2170 | <i>L. major</i> | 1844 | 509  | 2352 |
| LmjF26.2170 | <i>L. major</i> | 146  | 2636 | 2781 |
| LmjF26.2180 | <i>L. major</i> | 340  | 65   | 404  |
| LmjF26.2180 | <i>L. major</i> | 630  | 480  | 1109 |
| LmjF26.2180 | <i>L. major</i> | 201  | 1167 | 1367 |
| LmjF26.2180 | <i>L. major</i> | 138  | 1411 | 1548 |
| LmjF26.2190 | <i>L. major</i> | 67   | 47   | 113  |
| LmjF26.2190 | <i>L. major</i> | 65   | 301  | 365  |
| LmjF26.2200 | <i>L. major</i> | 311  | 1    | 311  |
| LmjF26.2210 | <i>L. major</i> | 63   | 1    | 63   |
| LmjF26.2210 | <i>L. major</i> | 205  | 131  | 335  |
| LmjF26.2210 | <i>L. major</i> | 118  | 571  | 688  |
| LmjF26.2250 | <i>L. major</i> | 60   | 1    | 60   |
| LmjF26.2250 | <i>L. major</i> | 78   | 90   | 167  |
| LmjF26.2250 | <i>L. major</i> | 140  | 208  | 347  |
| LmjF26.2250 | <i>L. major</i> | 98   | 373  | 470  |
| LmjF26.2250 | <i>L. major</i> | 40   | 557  | 596  |
| LmjF26.2250 | <i>L. major</i> | 89   | 644  | 732  |
| LmjF26.2260 | <i>L. major</i> | 58   | 1    | 58   |
| LmjF26.2260 | <i>L. major</i> | 92   | 515  | 606  |
| LmjF26.2260 | <i>L. major</i> | 92   | 515  | 606  |
| LmjF26.2270 | <i>L. major</i> | 84   | 184  | 267  |

|             |                 |     |      |      |
|-------------|-----------------|-----|------|------|
| LmjF26.2290 | <i>L. major</i> | 45  | 91   | 135  |
| LmjF26.2300 | <i>L. major</i> | 99  | 41   | 139  |
| LmjF26.2300 | <i>L. major</i> | 215 | 191  | 405  |
| LmjF26.2300 | <i>L. major</i> | 49  | 465  | 513  |
| LmjF26.2300 | <i>L. major</i> | 72  | 515  | 586  |
| LmjF26.2300 | <i>L. major</i> | 137 | 653  | 789  |
| LmjF26.2300 | <i>L. major</i> | 232 | 805  | 1036 |
| LmjF26.2300 | <i>L. major</i> | 79  | 1044 | 1122 |
| LmjF26.2310 | <i>L. major</i> | 91  | 21   | 111  |
| LmjF26.2310 | <i>L. major</i> | 50  | 135  | 184  |
| LmjF26.2310 | <i>L. major</i> | 62  | 220  | 281  |
| LmjF26.2320 | <i>L. major</i> | 160 | 270  | 429  |
| LmjF26.2320 | <i>L. major</i> | 165 | 494  | 658  |
| LmjF26.2330 | <i>L. major</i> | 43  | 1    | 43   |
| LmjF26.2330 | <i>L. major</i> | 52  | 76   | 127  |
| LmjF26.2330 | <i>L. major</i> | 52  | 76   | 127  |
| LmjF26.2340 | <i>L. major</i> | 43  | 1    | 43   |
| LmjF26.2340 | <i>L. major</i> | 52  | 76   | 127  |
| LmjF26.2340 | <i>L. major</i> | 52  | 76   | 127  |
| LmjF26.2350 | <i>L. major</i> | 105 | 23   | 127  |
| LmjF26.2350 | <i>L. major</i> | 257 | 144  | 400  |
| LmjF26.2350 | <i>L. major</i> | 65  | 414  | 478  |
| LmjF26.2350 | <i>L. major</i> | 261 | 482  | 742  |
| LmjF26.2350 | <i>L. major</i> | 74  | 762  | 835  |
| LmjF26.2350 | <i>L. major</i> | 50  | 838  | 887  |
| LmjF26.2360 | <i>L. major</i> | 40  | 363  | 402  |
| LmjF26.2360 | <i>L. major</i> | 62  | 554  | 615  |
| LmjF26.2360 | <i>L. major</i> | 62  | 554  | 615  |
| LmjF26.2370 | <i>L. major</i> | 44  | 122  | 165  |
| LmjF26.2370 | <i>L. major</i> | 133 | 181  | 313  |
| LmjF26.2370 | <i>L. major</i> | 42  | 335  | 376  |
| LmjF26.2370 | <i>L. major</i> | 70  | 413  | 482  |
| LmjF26.2370 | <i>L. major</i> | 61  | 527  | 587  |
| LmjF26.2370 | <i>L. major</i> | 162 | 610  | 771  |
| LmjF26.2370 | <i>L. major</i> | 66  | 817  | 882  |
| LmjF26.2370 | <i>L. major</i> | 94  | 936  | 1029 |
| LmjF26.2370 | <i>L. major</i> | 52  | 1202 | 1253 |
| LmjF26.2370 | <i>L. major</i> | 49  | 1381 | 1429 |
| LmjF26.2370 | <i>L. major</i> | 49  | 1580 | 1628 |
| LmjF26.2370 | <i>L. major</i> | 65  | 1785 | 1849 |
| LmjF26.2370 | <i>L. major</i> | 55  | 2238 | 2292 |
| LmjF26.2370 | <i>L. major</i> | 154 | 2447 | 2600 |
| LmjF26.2370 | <i>L. major</i> | 42  | 3228 | 3269 |
| LmjF26.2370 | <i>L. major</i> | 140 | 3427 | 3566 |
| LmjF26.2380 | <i>L. major</i> | 61  | 15   | 75   |
| LmjF26.2380 | <i>L. major</i> | 73  | 97   | 169  |
| LmjF26.2380 | <i>L. major</i> | 55  | 206  | 260  |

|             |                 |     |      |      |
|-------------|-----------------|-----|------|------|
| LmjF26.2380 | <i>L. major</i> | 53  | 565  | 617  |
| LmjF26.2380 | <i>L. major</i> | 68  | 1975 | 2042 |
| LmjF26.2380 | <i>L. major</i> | 46  | 2465 | 2510 |
| LmjF26.2380 | <i>L. major</i> | 85  | 2577 | 2661 |
| LmjF26.2380 | <i>L. major</i> | 46  | 2742 | 2787 |
| LmjF26.2380 | <i>L. major</i> | 114 | 3035 | 3148 |
| LmjF26.2380 | <i>L. major</i> | 69  | 3532 | 3600 |
| LmjF26.2380 | <i>L. major</i> | 89  | 3792 | 3880 |
| LmjF26.2380 | <i>L. major</i> | 68  | 4135 | 4202 |
| LmjF26.2380 | <i>L. major</i> | 113 | 4428 | 4540 |
| LmjF26.2380 | <i>L. major</i> | 40  | 4575 | 4614 |
| LmjF26.2380 | <i>L. major</i> | 40  | 4789 | 4828 |
| LmjF26.2380 | <i>L. major</i> | 126 | 4949 | 5074 |
| LmjF26.2390 | <i>L. major</i> | 209 | 9    | 217  |
| LmjF26.2390 | <i>L. major</i> | 125 | 351  | 475  |
| LmjF26.2390 | <i>L. major</i> | 292 | 517  | 808  |
| LmjF26.2410 | <i>L. major</i> | 44  | 32   | 75   |
| LmjF26.2410 | <i>L. major</i> | 63  | 136  | 198  |
| LmjF26.2410 | <i>L. major</i> | 63  | 136  | 198  |
| LmjF26.2420 | <i>L. major</i> | 126 | 146  | 271  |
| LmjF26.2440 | <i>L. major</i> | 111 | 74   | 184  |
| LmjF26.2440 | <i>L. major</i> | 101 | 189  | 289  |
| LmjF26.2440 | <i>L. major</i> | 81  | 547  | 627  |
| LmjF26.2440 | <i>L. major</i> | 185 | 664  | 848  |
| LmjF26.2440 | <i>L. major</i> | 188 | 856  | 1043 |
| LmjF26.2450 | <i>L. major</i> | 68  | 85   | 152  |
| LmjF26.2450 | <i>L. major</i> | 53  | 169  | 221  |
| LmjF26.2460 | <i>L. major</i> | 81  | 20   | 100  |
| LmjF26.2490 | <i>L. major</i> | 95  | 1    | 95   |
| LmjF26.2490 | <i>L. major</i> | 220 | 134  | 353  |
| LmjF26.2490 | <i>L. major</i> | 316 | 362  | 677  |
| LmjF26.2490 | <i>L. major</i> | 134 | 695  | 828  |
| LmjF26.2490 | <i>L. major</i> | 537 | 836  | 1372 |
| LmjF26.2490 | <i>L. major</i> | 61  | 1401 | 1461 |
| LmjF26.2520 | <i>L. major</i> | 131 | 75   | 205  |
| LmjF26.2520 | <i>L. major</i> | 192 | 298  | 489  |
| LmjF26.2530 | <i>L. major</i> | 126 | 374  | 499  |
| LmjF26.2570 | <i>L. major</i> | 45  | 312  | 356  |
| LmjF26.2580 | <i>L. major</i> | 151 | 1    | 151  |
| LmjF26.2590 | <i>L. major</i> | 55  | 593  | 647  |
| LmjF26.2600 | <i>L. major</i> | 230 | 1    | 230  |
| LmjF26.2600 | <i>L. major</i> | 51  | 258  | 308  |
| LmjF26.2600 | <i>L. major</i> | 259 | 443  | 701  |
| LmjF26.2640 | <i>L. major</i> | 109 | 118  | 226  |
| LmjF26.2640 | <i>L. major</i> | 77  | 245  | 321  |
| LmjF26.2650 | <i>L. major</i> | 69  | 1    | 69   |
| LmjF26.2650 | <i>L. major</i> | 68  | 108  | 175  |

|             |                 |     |     |      |
|-------------|-----------------|-----|-----|------|
| LmjF26.2650 | <i>L. major</i> | 120 | 227 | 346  |
| LmjF26.2660 | <i>L. major</i> | 599 | 1   | 599  |
| LmjF26.2660 | <i>L. major</i> | 64  | 601 | 664  |
| LmjF27.0010 | <i>L. major</i> | 97  | 115 | 211  |
| LmjF27.0050 | <i>L. major</i> | 128 | 1   | 128  |
| LmjF27.0050 | <i>L. major</i> | 59  | 417 | 475  |
| LmjF27.0050 | <i>L. major</i> | 76  | 713 | 788  |
| LmjF27.0100 | <i>L. major</i> | 337 | 324 | 660  |
| LmjF27.0120 | <i>L. major</i> | 54  | 367 | 420  |
| LmjF27.0130 | <i>L. major</i> | 44  | 1   | 44   |
| LmjF27.0140 | <i>L. major</i> | 87  | 67  | 153  |
| LmjF27.0150 | <i>L. major</i> | 115 | 69  | 183  |
| LmjF27.0170 | <i>L. major</i> | 46  | 1   | 46   |
| LmjF27.0170 | <i>L. major</i> | 49  | 86  | 134  |
| LmjF27.0170 | <i>L. major</i> | 49  | 86  | 134  |
| LmjF27.0180 | <i>L. major</i> | 44  | 136 | 179  |
| LmjF27.0200 | <i>L. major</i> | 79  | 254 | 332  |
| LmjF27.0210 | <i>L. major</i> | 52  | 1   | 52   |
| LmjF27.0220 | <i>L. major</i> | 54  | 140 | 193  |
| LmjF27.0220 | <i>L. major</i> | 56  | 209 | 264  |
| LmjF27.0220 | <i>L. major</i> | 56  | 209 | 264  |
| LmjF27.0240 | <i>L. major</i> | 729 | 1   | 729  |
| LmjF27.0250 | <i>L. major</i> | 59  | 92  | 150  |
| LmjF27.0250 | <i>L. major</i> | 40  | 356 | 395  |
| LmjF27.0250 | <i>L. major</i> | 40  | 356 | 395  |
| LmjF27.0270 | <i>L. major</i> | 148 | 1   | 148  |
| LmjF27.0270 | <i>L. major</i> | 82  | 203 | 284  |
| LmjF27.0270 | <i>L. major</i> | 58  | 332 | 389  |
| LmjF27.0270 | <i>L. major</i> | 350 | 419 | 768  |
| LmjF27.0270 | <i>L. major</i> | 161 | 783 | 943  |
| LmjF27.0270 | <i>L. major</i> | 97  | 964 | 1060 |
| LmjF27.0290 | <i>L. major</i> | 44  | 1   | 44   |
| LmjF27.0310 | <i>L. major</i> | 40  | 636 | 675  |
| LmjF27.0320 | <i>L. major</i> | 59  | 436 | 494  |
| LmjF27.0330 | <i>L. major</i> | 113 | 13  | 125  |
| LmjF27.0330 | <i>L. major</i> | 138 | 234 | 371  |
| LmjF27.0340 | <i>L. major</i> | 52  | 1   | 52   |
| LmjF27.0350 | <i>L. major</i> | 57  | 321 | 377  |
| LmjF27.0380 | <i>L. major</i> | 596 | 1   | 596  |
| LmjF27.0380 | <i>L. major</i> | 120 | 628 | 747  |
| LmjF27.0380 | <i>L. major</i> | 116 | 862 | 977  |
| LmjF27.0390 | <i>L. major</i> | 48  | 660 | 707  |
| LmjF27.0390 | <i>L. major</i> | 111 | 767 | 877  |
| LmjF27.0390 | <i>L. major</i> | 111 | 767 | 877  |
| LmjF27.0410 | <i>L. major</i> | 99  | 30  | 128  |
| LmjF27.0410 | <i>L. major</i> | 111 | 148 | 258  |
| LmjF27.0430 | <i>L. major</i> | 610 | 1   | 610  |

|             |                 |      |      |      |
|-------------|-----------------|------|------|------|
| LmjF27.0440 | <i>L. major</i> | 46   | 443  | 488  |
| LmjF27.0450 | <i>L. major</i> | 117  | 1    | 117  |
| LmjF27.0460 | <i>L. major</i> | 52   | 1    | 52   |
| LmjF27.0460 | <i>L. major</i> | 133  | 212  | 344  |
| LmjF27.0460 | <i>L. major</i> | 236  | 390  | 625  |
| LmjF27.0480 | <i>L. major</i> | 77   | 355  | 431  |
| LmjF27.0480 | <i>L. major</i> | 70   | 488  | 557  |
| LmjF27.0490 | <i>L. major</i> | 52   | 586  | 637  |
| LmjF27.0490 | <i>L. major</i> | 420  | 1196 | 1615 |
| LmjF27.0490 | <i>L. major</i> | 112  | 1677 | 1788 |
| LmjF27.0490 | <i>L. major</i> | 1569 | 1955 | 3523 |
| LmjF27.0490 | <i>L. major</i> | 158  | 3628 | 3785 |
| LmjF27.0490 | <i>L. major</i> | 113  | 3823 | 3935 |
| LmjF27.0490 | <i>L. major</i> | 62   | 4492 | 4553 |
| LmjF27.0500 | <i>L. major</i> | 75   | 1194 | 1268 |
| LmjF27.0500 | <i>L. major</i> | 55   | 1287 | 1341 |
| LmjF27.0500 | <i>L. major</i> | 115  | 1362 | 1476 |
| LmjF27.0500 | <i>L. major</i> | 75   | 1483 | 1557 |
| LmjF27.0500 | <i>L. major</i> | 59   | 1566 | 1624 |
| LmjF27.0500 | <i>L. major</i> | 132  | 1687 | 1818 |
| LmjF27.0500 | <i>L. major</i> | 79   | 1820 | 1898 |
| LmjF27.0500 | <i>L. major</i> | 225  | 1926 | 2150 |
| LmjF27.0500 | <i>L. major</i> | 497  | 2187 | 2683 |
| LmjF27.0500 | <i>L. major</i> | 54   | 2709 | 2762 |
| LmjF27.0500 | <i>L. major</i> | 187  | 2788 | 2974 |
| LmjF27.0500 | <i>L. major</i> | 445  | 2976 | 3420 |
| LmjF27.0500 | <i>L. major</i> | 293  | 3502 | 3794 |
| LmjF27.0500 | <i>L. major</i> | 83   | 3825 | 3907 |
| LmjF27.0500 | <i>L. major</i> | 48   | 3931 | 3978 |
| LmjF27.0500 | <i>L. major</i> | 783  | 3994 | 4776 |
| LmjF27.0500 | <i>L. major</i> | 716  | 4813 | 5528 |
| LmjF27.0500 | <i>L. major</i> | 74   | 6091 | 6164 |
| LmjF27.0510 | <i>L. major</i> | 75   | 1192 | 1266 |
| LmjF27.0510 | <i>L. major</i> | 64   | 1350 | 1413 |
| LmjF27.0510 | <i>L. major</i> | 191  | 1428 | 1618 |
| LmjF27.0510 | <i>L. major</i> | 258  | 1700 | 1957 |
| LmjF27.0510 | <i>L. major</i> | 258  | 2039 | 2296 |
| LmjF27.0510 | <i>L. major</i> | 258  | 2378 | 2635 |
| LmjF27.0510 | <i>L. major</i> | 206  | 2717 | 2922 |
| LmjF27.0510 | <i>L. major</i> | 48   | 3056 | 3103 |
| LmjF27.0510 | <i>L. major</i> | 89   | 3107 | 3195 |
| LmjF27.0510 | <i>L. major</i> | 54   | 3197 | 3250 |
| LmjF27.0510 | <i>L. major</i> | 86   | 3368 | 3453 |
| LmjF27.0510 | <i>L. major</i> | 61   | 3465 | 3525 |
| LmjF27.0510 | <i>L. major</i> | 72   | 3578 | 3649 |
| LmjF27.0510 | <i>L. major</i> | 178  | 3674 | 3851 |
| LmjF27.0510 | <i>L. major</i> | 56   | 3916 | 3971 |



|             |                 |     |      |      |
|-------------|-----------------|-----|------|------|
| LmjF27.0510 | <i>L. major</i> | 123 | 4051 | 4173 |
| LmjF27.0510 | <i>L. major</i> | 120 | 4187 | 4306 |
| LmjF27.0510 | <i>L. major</i> | 58  | 4317 | 4374 |
| LmjF27.0510 | <i>L. major</i> | 49  | 4392 | 4440 |
| LmjF27.0510 | <i>L. major</i> | 87  | 4471 | 4557 |
| LmjF27.0510 | <i>L. major</i> | 101 | 4610 | 4710 |
| LmjF27.0510 | <i>L. major</i> | 77  | 5282 | 5358 |
| LmjF27.0520 | <i>L. major</i> | 169 | 1    | 169  |
| LmjF27.0520 | <i>L. major</i> | 83  | 194  | 276  |
| LmjF27.0530 | <i>L. major</i> | 125 | 153  | 277  |
| LmjF27.0530 | <i>L. major</i> | 109 | 306  | 414  |
| LmjF27.0530 | <i>L. major</i> | 117 | 426  | 542  |
| LmjF27.0570 | <i>L. major</i> | 41  | 1    | 41   |
| LmjF27.0570 | <i>L. major</i> | 169 | 190  | 358  |
| LmjF27.0570 | <i>L. major</i> | 162 | 388  | 549  |
| LmjF27.0580 | <i>L. major</i> | 58  | 217  | 274  |
| LmjF27.0590 | <i>L. major</i> | 106 | 39   | 144  |
| LmjF27.0600 | <i>L. major</i> | 378 | 1    | 378  |
| LmjF27.0600 | <i>L. major</i> | 79  | 414  | 492  |
| LmjF27.0600 | <i>L. major</i> | 89  | 647  | 735  |
| LmjF27.0600 | <i>L. major</i> | 196 | 793  | 988  |
| LmjF27.0610 | <i>L. major</i> | 182 | 74   | 255  |
| LmjF27.0610 | <i>L. major</i> | 200 | 263  | 462  |
| LmjF27.0620 | <i>L. major</i> | 45  | 1    | 45   |
| LmjF27.0620 | <i>L. major</i> | 66  | 149  | 214  |
| LmjF27.0620 | <i>L. major</i> | 66  | 149  | 214  |
| LmjF27.0630 | <i>L. major</i> | 56  | 524  | 579  |
| LmjF27.0640 | <i>L. major</i> | 44  | 118  | 161  |
| LmjF27.0640 | <i>L. major</i> | 71  | 192  | 262  |
| LmjF27.0640 | <i>L. major</i> | 71  | 192  | 262  |
| LmjF27.0660 | <i>L. major</i> | 92  | 206  | 297  |
| LmjF27.0660 | <i>L. major</i> | 170 | 336  | 505  |
| LmjF27.0670 | <i>L. major</i> | 59  | 16   | 74   |
| LmjF27.0680 | <i>L. major</i> | 96  | 1    | 96   |
| LmjF27.0690 | <i>L. major</i> | 42  | 1    | 42   |
| LmjF27.0690 | <i>L. major</i> | 80  | 340  | 419  |
| LmjF27.0690 | <i>L. major</i> | 80  | 340  | 419  |
| LmjF27.0700 | <i>L. major</i> | 176 | 1    | 176  |
| LmjF27.0700 | <i>L. major</i> | 116 | 344  | 459  |
| LmjF27.0720 | <i>L. major</i> | 326 | 66   | 391  |
| LmjF27.0740 | <i>L. major</i> | 47  | 1    | 47   |
| LmjF27.0770 | <i>L. major</i> | 52  | 731  | 782  |
| LmjF27.0770 | <i>L. major</i> | 262 | 788  | 1049 |
| LmjF27.0770 | <i>L. major</i> | 68  | 1207 | 1274 |
| LmjF27.0780 | <i>L. major</i> | 61  | 1    | 61   |
| LmjF27.0780 | <i>L. major</i> | 42  | 154  | 195  |
| LmjF27.0780 | <i>L. major</i> | 42  | 154  | 195  |

|             |                 |     |      |      |
|-------------|-----------------|-----|------|------|
| LmjF27.0790 | <i>L. major</i> | 192 | 1    | 192  |
| LmjF27.0790 | <i>L. major</i> | 99  | 239  | 337  |
| LmjF27.0790 | <i>L. major</i> | 73  | 819  | 891  |
| LmjF27.0800 | <i>L. major</i> | 111 | 16   | 126  |
| LmjF27.0820 | <i>L. major</i> | 58  | 194  | 251  |
| LmjF27.0820 | <i>L. major</i> | 87  | 347  | 433  |
| LmjF27.0820 | <i>L. major</i> | 46  | 967  | 1012 |
| LmjF27.0820 | <i>L. major</i> | 58  | 1827 | 1884 |
| LmjF27.0820 | <i>L. major</i> | 110 | 2835 | 2944 |
| LmjF27.0820 | <i>L. major</i> | 158 | 3119 | 3276 |
| LmjF27.0830 | <i>L. major</i> | 96  | 85   | 180  |
| LmjF27.0830 | <i>L. major</i> | 115 | 209  | 323  |
| LmjF27.0850 | <i>L. major</i> | 80  | 56   | 135  |
| LmjF27.0850 | <i>L. major</i> | 99  | 228  | 326  |
| LmjF27.0850 | <i>L. major</i> | 79  | 493  | 571  |
| LmjF27.0860 | <i>L. major</i> | 41  | 804  | 844  |
| LmjF27.0870 | <i>L. major</i> | 45  | 380  | 424  |
| LmjF27.0870 | <i>L. major</i> | 42  | 623  | 664  |
| LmjF27.0870 | <i>L. major</i> | 42  | 623  | 664  |
| LmjF27.0880 | <i>L. major</i> | 59  | 555  | 613  |
| LmjF27.0880 | <i>L. major</i> | 44  | 949  | 992  |
| LmjF27.0880 | <i>L. major</i> | 44  | 949  | 992  |
| LmjF27.0890 | <i>L. major</i> | 52  | 42   | 93   |
| LmjF27.0890 | <i>L. major</i> | 218 | 153  | 370  |
| LmjF27.0890 | <i>L. major</i> | 70  | 780  | 849  |
| LmjF27.0890 | <i>L. major</i> | 120 | 1080 | 1199 |
| LmjF27.0890 | <i>L. major</i> | 92  | 1301 | 1392 |
| LmjF27.0890 | <i>L. major</i> | 42  | 1517 | 1558 |
| LmjF27.0890 | <i>L. major</i> | 41  | 1756 | 1796 |
| LmjF27.0910 | <i>L. major</i> | 47  | 336  | 382  |
| LmjF27.0910 | <i>L. major</i> | 42  | 414  | 455  |
| LmjF27.0910 | <i>L. major</i> | 42  | 414  | 455  |
| LmjF27.0940 | <i>L. major</i> | 41  | 404  | 444  |
| LmjF27.0940 | <i>L. major</i> | 107 | 479  | 585  |
| LmjF27.0950 | <i>L. major</i> | 57  | 1    | 57   |
| LmjF27.0950 | <i>L. major</i> | 104 | 195  | 298  |
| LmjF27.0950 | <i>L. major</i> | 273 | 346  | 618  |
| LmjF27.0960 | <i>L. major</i> | 86  | 676  | 761  |
| LmjF27.0960 | <i>L. major</i> | 42  | 836  | 877  |
| LmjF27.0960 | <i>L. major</i> | 45  | 1002 | 1046 |
| LmjF27.0970 | <i>L. major</i> | 144 | 1    | 144  |
| LmjF27.0970 | <i>L. major</i> | 60  | 1785 | 1844 |
| LmjF27.0970 | <i>L. major</i> | 60  | 1785 | 1844 |
| LmjF27.0980 | <i>L. major</i> | 43  | 1    | 43   |
| LmjF27.0980 | <i>L. major</i> | 85  | 88   | 172  |
| LmjF27.0980 | <i>L. major</i> | 54  | 1827 | 1880 |
| LmjF27.0990 | <i>L. major</i> | 43  | 1    | 43   |

|             |                 |     |     |     |
|-------------|-----------------|-----|-----|-----|
| LmjF27.0990 | <i>L. major</i> | 46  | 82  | 127 |
| LmjF27.0990 | <i>L. major</i> | 47  | 194 | 240 |
| LmjF27.1010 | <i>L. major</i> | 45  | 1   | 45  |
| LmjF27.1010 | <i>L. major</i> | 60  | 54  | 113 |
| LmjF27.1010 | <i>L. major</i> | 103 | 832 | 934 |
| LmjF27.1030 | <i>L. major</i> | 156 | 1   | 156 |
| LmjF27.1030 | <i>L. major</i> | 98  | 453 | 550 |
| LmjF27.1030 | <i>L. major</i> | 58  | 756 | 813 |
| LmjF27.1040 | <i>L. major</i> | 121 | 1   | 121 |
| LmjF27.1040 | <i>L. major</i> | 99  | 286 | 384 |
| LmjF27.1045 | <i>L. major</i> | 45  | 1   | 45  |
| LmjF27.1050 | <i>L. major</i> | 89  | 1   | 89  |
| LmjF27.1050 | <i>L. major</i> | 72  | 595 | 666 |
| LmjF27.1070 | <i>L. major</i> | 65  | 211 | 275 |
| LmjF27.1070 | <i>L. major</i> | 97  | 552 | 648 |
| LmjF27.1070 | <i>L. major</i> | 97  | 552 | 648 |
| LmjF27.1080 | <i>L. major</i> | 104 | 1   | 104 |
| LmjF27.1080 | <i>L. major</i> | 40  | 226 | 265 |
| LmjF27.1080 | <i>L. major</i> | 65  | 605 | 669 |
| LmjF27.1080 | <i>L. major</i> | 45  | 841 | 885 |
| LmjF27.1100 | <i>L. major</i> | 72  | 1   | 72  |
| LmjF27.1100 | <i>L. major</i> | 81  | 146 | 226 |
| LmjF27.1100 | <i>L. major</i> | 382 | 266 | 647 |
| LmjF27.1110 | <i>L. major</i> | 103 | 1   | 103 |
| LmjF27.1110 | <i>L. major</i> | 54  | 181 | 234 |
| LmjF27.1120 | <i>L. major</i> | 82  | 140 | 221 |
| LmjF27.1130 | <i>L. major</i> | 169 | 3   | 171 |
| LmjF27.1130 | <i>L. major</i> | 107 | 705 | 811 |
| LmjF27.1140 | <i>L. major</i> | 57  | 15  | 71  |
| LmjF27.1140 | <i>L. major</i> | 40  | 99  | 138 |
| LmjF27.1140 | <i>L. major</i> | 420 | 164 | 583 |
| LmjF27.1150 | <i>L. major</i> | 77  | 60  | 136 |
| LmjF27.1160 | <i>L. major</i> | 60  | 1   | 60  |
| LmjF27.1160 | <i>L. major</i> | 60  | 123 | 182 |
| LmjF27.1160 | <i>L. major</i> | 54  | 750 | 803 |
| LmjF27.1170 | <i>L. major</i> | 51  | 45  | 95  |
| LmjF27.1170 | <i>L. major</i> | 116 | 130 | 245 |
| LmjF27.1180 | <i>L. major</i> | 48  | 145 | 192 |
| LmjF27.1200 | <i>L. major</i> | 214 | 1   | 214 |
| LmjF27.1200 | <i>L. major</i> | 111 | 305 | 415 |
| LmjF27.1210 | <i>L. major</i> | 146 | 1   | 146 |
| LmjF27.1210 | <i>L. major</i> | 58  | 449 | 506 |
| LmjF27.1220 | <i>L. major</i> | 128 | 1   | 128 |
| LmjF27.1220 | <i>L. major</i> | 58  | 193 | 250 |
| LmjF27.1220 | <i>L. major</i> | 54  | 359 | 412 |
| LmjF27.1230 | <i>L. major</i> | 51  | 1   | 51  |
| LmjF27.1230 | <i>L. major</i> | 122 | 168 | 289 |

|             |                 |     |      |      |
|-------------|-----------------|-----|------|------|
| LmjF27.1230 | <i>L. major</i> | 187 | 332  | 518  |
| LmjF27.1270 | <i>L. major</i> | 141 | 91   | 231  |
| LmjF27.1275 | <i>L. major</i> | 160 | 1    | 160  |
| LmjF27.1275 | <i>L. major</i> | 201 | 243  | 443  |
| LmjF27.1290 | <i>L. major</i> | 62  | 1    | 62   |
| LmjF27.1300 | <i>L. major</i> | 163 | 22   | 184  |
| LmjF27.1300 | <i>L. major</i> | 52  | 478  | 529  |
| LmjF27.1310 | <i>L. major</i> | 46  | 489  | 534  |
| LmjF27.1320 | <i>L. major</i> | 40  | 119  | 158  |
| LmjF27.1320 | <i>L. major</i> | 77  | 193  | 269  |
| LmjF27.1320 | <i>L. major</i> | 74  | 527  | 600  |
| LmjF27.1340 | <i>L. major</i> | 49  | 59   | 107  |
| LmjF27.1340 | <i>L. major</i> | 114 | 229  | 342  |
| LmjF27.1350 | <i>L. major</i> | 264 | 54   | 317  |
| LmjF27.1360 | <i>L. major</i> | 67  | 46   | 112  |
| LmjF27.1360 | <i>L. major</i> | 42  | 211  | 252  |
| LmjF27.1360 | <i>L. major</i> | 424 | 263  | 686  |
| LmjF27.1370 | <i>L. major</i> | 545 | 1    | 545  |
| LmjF27.1370 | <i>L. major</i> | 574 | 795  | 1368 |
| LmjF27.1370 | <i>L. major</i> | 107 | 1385 | 1491 |
| LmjF27.1380 | <i>L. major</i> | 57  | 267  | 323  |
| LmjF27.1390 | <i>L. major</i> | 57  | 267  | 323  |
| LmjF27.1410 | <i>L. major</i> | 65  | 105  | 169  |
| LmjF27.1420 | <i>L. major</i> | 96  | 53   | 148  |
| LmjF27.1420 | <i>L. major</i> | 106 | 158  | 263  |
| LmjF27.1430 | <i>L. major</i> | 57  | 248  | 304  |
| LmjF27.1430 | <i>L. major</i> | 71  | 361  | 431  |
| LmjF27.1430 | <i>L. major</i> | 116 | 452  | 567  |
| LmjF27.1430 | <i>L. major</i> | 57  | 594  | 650  |
| LmjF27.1430 | <i>L. major</i> | 56  | 803  | 858  |
| LmjF27.1440 | <i>L. major</i> | 215 | 1    | 215  |
| LmjF27.1450 | <i>L. major</i> | 205 | 649  | 853  |
| LmjF27.1460 | <i>L. major</i> | 47  | 288  | 334  |
| LmjF27.1490 | <i>L. major</i> | 262 | 159  | 420  |
| LmjF27.1490 | <i>L. major</i> | 50  | 447  | 496  |
| LmjF27.1490 | <i>L. major</i> | 96  | 573  | 668  |
| LmjF27.1520 | <i>L. major</i> | 46  | 179  | 224  |
| LmjF27.1520 | <i>L. major</i> | 98  | 306  | 403  |
| LmjF27.1550 | <i>L. major</i> | 48  | 87   | 134  |
| LmjF27.1560 | <i>L. major</i> | 54  | 773  | 826  |
| LmjF27.1570 | <i>L. major</i> | 49  | 89   | 137  |
| LmjF27.1570 | <i>L. major</i> | 115 | 212  | 326  |
| LmjF27.1570 | <i>L. major</i> | 115 | 212  | 326  |
| LmjF27.1580 | <i>L. major</i> | 50  | 1    | 50   |
| LmjF27.1600 | <i>L. major</i> | 41  | 135  | 175  |
| LmjF27.1630 | <i>L. major</i> | 50  | 1    | 50   |
| LmjF27.1630 | <i>L. major</i> | 67  | 119  | 185  |

|             |                 |     |      |      |
|-------------|-----------------|-----|------|------|
| LmjF27.1630 | <i>L. major</i> | 76  | 359  | 434  |
| LmjF27.1630 | <i>L. major</i> | 78  | 764  | 841  |
| LmjF27.1640 | <i>L. major</i> | 43  | 434  | 476  |
| LmjF27.1640 | <i>L. major</i> | 111 | 585  | 695  |
| LmjF27.1640 | <i>L. major</i> | 180 | 735  | 914  |
| LmjF27.1650 | <i>L. major</i> | 102 | 77   | 178  |
| LmjF27.1650 | <i>L. major</i> | 121 | 205  | 325  |
| LmjF27.1650 | <i>L. major</i> | 246 | 340  | 585  |
| LmjF27.1650 | <i>L. major</i> | 98  | 613  | 710  |
| LmjF27.1650 | <i>L. major</i> | 193 | 716  | 908  |
| LmjF27.1650 | <i>L. major</i> | 168 | 936  | 1103 |
| LmjF27.1650 | <i>L. major</i> | 51  | 1174 | 1224 |
| LmjF27.1650 | <i>L. major</i> | 49  | 1242 | 1290 |
| LmjF27.1660 | <i>L. major</i> | 53  | 1100 | 1152 |
| LmjF27.1670 | <i>L. major</i> | 51  | 272  | 322  |
| LmjF27.1680 | <i>L. major</i> | 80  | 1    | 80   |
| LmjF27.1680 | <i>L. major</i> | 49  | 307  | 355  |
| LmjF27.1700 | <i>L. major</i> | 86  | 1    | 86   |
| LmjF27.1710 | <i>L. major</i> | 82  | 1    | 82   |
| LmjF27.1730 | <i>L. major</i> | 53  | 123  | 175  |
| LmjF27.1730 | <i>L. major</i> | 126 | 215  | 340  |
| LmjF27.1750 | <i>L. major</i> | 53  | 73   | 125  |
| LmjF27.1750 | <i>L. major</i> | 78  | 189  | 266  |
| LmjF27.1750 | <i>L. major</i> | 122 | 3033 | 3154 |
| LmjF27.1750 | <i>L. major</i> | 79  | 3261 | 3339 |
| LmjF27.1750 | <i>L. major</i> | 64  | 3551 | 3614 |
| LmjF27.1750 | <i>L. major</i> | 48  | 4144 | 4191 |
| LmjF27.1770 | <i>L. major</i> | 65  | 380  | 444  |
| LmjF27.1770 | <i>L. major</i> | 59  | 675  | 733  |
| LmjF27.1770 | <i>L. major</i> | 59  | 675  | 733  |
| LmjF27.1780 | <i>L. major</i> | 97  | 1    | 97   |
| LmjF27.1780 | <i>L. major</i> | 44  | 156  | 199  |
| LmjF27.1780 | <i>L. major</i> | 50  | 414  | 463  |
| LmjF27.1780 | <i>L. major</i> | 49  | 512  | 560  |
| LmjF27.1790 | <i>L. major</i> | 499 | 150  | 648  |
| LmjF27.1790 | <i>L. major</i> | 132 | 711  | 842  |
| LmjF27.1800 | <i>L. major</i> | 634 | 331  | 964  |
| LmjF27.1800 | <i>L. major</i> | 351 | 973  | 1323 |
| LmjF27.1800 | <i>L. major</i> | 398 | 1331 | 1728 |
| LmjF27.1820 | <i>L. major</i> | 133 | 1    | 133  |
| LmjF27.1820 | <i>L. major</i> | 65  | 136  | 200  |
| LmjF27.1820 | <i>L. major</i> | 129 | 219  | 347  |
| LmjF27.1820 | <i>L. major</i> | 242 | 384  | 625  |
| LmjF27.1820 | <i>L. major</i> | 879 | 629  | 1507 |
| LmjF27.1820 | <i>L. major</i> | 60  | 1582 | 1641 |
| LmjF27.1820 | <i>L. major</i> | 403 | 1674 | 2076 |
| LmjF27.1820 | <i>L. major</i> | 161 | 2097 | 2257 |

|             |                 |     |      |      |
|-------------|-----------------|-----|------|------|
| LmjF27.1840 | <i>L. major</i> | 131 | 71   | 201  |
| LmjF27.1840 | <i>L. major</i> | 66  | 237  | 302  |
| LmjF27.1840 | <i>L. major</i> | 91  | 306  | 396  |
| LmjF27.1840 | <i>L. major</i> | 89  | 458  | 546  |
| LmjF27.1840 | <i>L. major</i> | 44  | 550  | 593  |
| LmjF27.1840 | <i>L. major</i> | 295 | 628  | 922  |
| LmjF27.1840 | <i>L. major</i> | 130 | 1136 | 1265 |
| LmjF27.1840 | <i>L. major</i> | 169 | 1396 | 1564 |
| LmjF27.1850 | <i>L. major</i> | 118 | 266  | 383  |
| LmjF27.1850 | <i>L. major</i> | 50  | 446  | 495  |
| LmjF27.1850 | <i>L. major</i> | 158 | 564  | 721  |
| LmjF27.1860 | <i>L. major</i> | 232 | 1    | 232  |
| LmjF27.1860 | <i>L. major</i> | 132 | 312  | 443  |
| LmjF27.1860 | <i>L. major</i> | 292 | 462  | 753  |
| LmjF27.1860 | <i>L. major</i> | 60  | 789  | 848  |
| LmjF27.1880 | <i>L. major</i> | 43  | 44   | 86   |
| LmjF27.1880 | <i>L. major</i> | 88  | 437  | 524  |
| LmjF27.1880 | <i>L. major</i> | 88  | 437  | 524  |
| LmjF27.1890 | <i>L. major</i> | 337 | 504  | 840  |
| LmjF27.1895 | <i>L. major</i> | 110 | 95   | 204  |
| LmjF27.1895 | <i>L. major</i> | 56  | 242  | 297  |
| LmjF27.1895 | <i>L. major</i> | 45  | 329  | 373  |
| LmjF27.1895 | <i>L. major</i> | 70  | 723  | 792  |
| LmjF27.1900 | <i>L. major</i> | 55  | 1    | 55   |
| LmjF27.1910 | <i>L. major</i> | 73  | 68   | 140  |
| LmjF27.1920 | <i>L. major</i> | 49  | 1    | 49   |
| LmjF27.1920 | <i>L. major</i> | 46  | 420  | 465  |
| LmjF27.1920 | <i>L. major</i> | 72  | 601  | 672  |
| LmjF27.1930 | <i>L. major</i> | 61  | 294  | 354  |
| LmjF27.1940 | <i>L. major</i> | 101 | 1    | 101  |
| LmjF27.1940 | <i>L. major</i> | 124 | 125  | 248  |
| LmjF27.1940 | <i>L. major</i> | 115 | 373  | 487  |
| LmjF27.1940 | <i>L. major</i> | 212 | 749  | 960  |
| LmjF27.1945 | <i>L. major</i> | 210 | 18   | 227  |
| LmjF27.1950 | <i>L. major</i> | 61  | 65   | 125  |
| LmjF27.1950 | <i>L. major</i> | 84  | 199  | 282  |
| LmjF27.1950 | <i>L. major</i> | 227 | 566  | 792  |
| LmjF27.1950 | <i>L. major</i> | 104 | 820  | 923  |
| LmjF27.1950 | <i>L. major</i> | 101 | 970  | 1070 |
| LmjF27.1950 | <i>L. major</i> | 162 | 1285 | 1446 |
| LmjF27.1960 | <i>L. major</i> | 206 | 1    | 206  |
| LmjF27.1960 | <i>L. major</i> | 176 | 256  | 431  |
| LmjF27.1980 | <i>L. major</i> | 135 | 328  | 462  |
| LmjF27.1980 | <i>L. major</i> | 72  | 476  | 547  |
| LmjF27.1980 | <i>L. major</i> | 215 | 559  | 773  |
| LmjF27.1980 | <i>L. major</i> | 100 | 825  | 924  |
| LmjF27.1990 | <i>L. major</i> | 116 | 43   | 158  |

|             |                 |     |      |      |
|-------------|-----------------|-----|------|------|
| LmjF27.1990 | <i>L. major</i> | 65  | 176  | 240  |
| LmjF27.1990 | <i>L. major</i> | 98  | 263  | 360  |
| LmjF27.1990 | <i>L. major</i> | 94  | 425  | 518  |
| LmjF27.1990 | <i>L. major</i> | 134 | 591  | 724  |
| LmjF27.1990 | <i>L. major</i> | 107 | 890  | 996  |
| LmjF27.2010 | <i>L. major</i> | 97  | 1    | 97   |
| LmjF27.2010 | <i>L. major</i> | 126 | 126  | 251  |
| LmjF27.2040 | <i>L. major</i> | 49  | 179  | 227  |
| LmjF27.2050 | <i>L. major</i> | 72  | 1    | 72   |
| LmjF27.2060 | <i>L. major</i> | 46  | 75   | 120  |
| LmjF27.2060 | <i>L. major</i> | 67  | 191  | 257  |
| LmjF27.2060 | <i>L. major</i> | 95  | 288  | 382  |
| LmjF27.2070 | <i>L. major</i> | 133 | 1    | 133  |
| LmjF27.2070 | <i>L. major</i> | 293 | 430  | 722  |
| LmjF27.2070 | <i>L. major</i> | 49  | 804  | 852  |
| LmjF27.2100 | <i>L. major</i> | 57  | 83   | 139  |
| LmjF27.2100 | <i>L. major</i> | 50  | 198  | 247  |
| LmjF27.2100 | <i>L. major</i> | 128 | 312  | 439  |
| LmjF27.2110 | <i>L. major</i> | 59  | 1    | 59   |
| LmjF27.2110 | <i>L. major</i> | 43  | 180  | 222  |
| LmjF27.2110 | <i>L. major</i> | 68  | 368  | 435  |
| LmjF27.2110 | <i>L. major</i> | 140 | 578  | 717  |
| LmjF27.2120 | <i>L. major</i> | 103 | 184  | 286  |
| LmjF27.2130 | <i>L. major</i> | 59  | 1    | 59   |
| LmjF27.2130 | <i>L. major</i> | 134 | 108  | 241  |
| LmjF27.2130 | <i>L. major</i> | 163 | 243  | 405  |
| LmjF27.2130 | <i>L. major</i> | 60  | 467  | 526  |
| LmjF27.2130 | <i>L. major</i> | 74  | 632  | 705  |
| LmjF27.2130 | <i>L. major</i> | 52  | 876  | 927  |
| LmjF27.2130 | <i>L. major</i> | 244 | 1186 | 1429 |
| LmjF27.2130 | <i>L. major</i> | 185 | 1479 | 1663 |
| LmjF27.2140 | <i>L. major</i> | 348 | 1    | 348  |
| LmjF27.2140 | <i>L. major</i> | 60  | 398  | 457  |
| LmjF27.2140 | <i>L. major</i> | 64  | 484  | 547  |
| LmjF27.2140 | <i>L. major</i> | 51  | 612  | 662  |
| LmjF27.2140 | <i>L. major</i> | 65  | 799  | 863  |
| LmjF27.2170 | <i>L. major</i> | 48  | 154  | 201  |
| LmjF27.2170 | <i>L. major</i> | 111 | 388  | 498  |
| LmjF27.2170 | <i>L. major</i> | 262 | 947  | 1208 |
| LmjF27.2170 | <i>L. major</i> | 141 | 1210 | 1350 |
| LmjF27.2170 | <i>L. major</i> | 175 | 1383 | 1557 |
| LmjF27.2200 | <i>L. major</i> | 122 | 1    | 122  |
| LmjF27.2210 | <i>L. major</i> | 60  | 40   | 99   |
| LmjF27.2220 | <i>L. major</i> | 63  | 200  | 262  |
| LmjF27.2230 | <i>L. major</i> | 90  | 1    | 90   |
| LmjF27.2230 | <i>L. major</i> | 43  | 269  | 311  |
| LmjF27.2230 | <i>L. major</i> | 43  | 402  | 444  |

|             |                 |     |      |      |
|-------------|-----------------|-----|------|------|
| LmjF27.2230 | <i>L. major</i> | 87  | 477  | 563  |
| LmjF27.2230 | <i>L. major</i> | 53  | 623  | 675  |
| LmjF27.2230 | <i>L. major</i> | 52  | 741  | 792  |
| LmjF27.2230 | <i>L. major</i> | 45  | 875  | 919  |
| LmjF27.2230 | <i>L. major</i> | 88  | 1243 | 1330 |
| LmjF27.2230 | <i>L. major</i> | 96  | 1370 | 1465 |
| LmjF27.2230 | <i>L. major</i> | 82  | 1691 | 1772 |
| LmjF27.2230 | <i>L. major</i> | 104 | 1801 | 1904 |
| LmjF27.2230 | <i>L. major</i> | 46  | 1918 | 1963 |
| LmjF27.2240 | <i>L. major</i> | 125 | 262  | 386  |
| LmjF27.2250 | <i>L. major</i> | 51  | 196  | 246  |
| LmjF27.2260 | <i>L. major</i> | 68  | 209  | 276  |
| LmjF27.2260 | <i>L. major</i> | 58  | 311  | 368  |
| LmjF27.2260 | <i>L. major</i> | 55  | 448  | 502  |
| LmjF27.2260 | <i>L. major</i> | 83  | 687  | 769  |
| LmjF27.2260 | <i>L. major</i> | 52  | 955  | 1006 |
| LmjF27.2260 | <i>L. major</i> | 74  | 1069 | 1142 |
| LmjF27.2270 | <i>L. major</i> | 56  | 1    | 56   |
| LmjF27.2270 | <i>L. major</i> | 379 | 124  | 502  |
| LmjF27.2270 | <i>L. major</i> | 120 | 545  | 664  |
| LmjF27.2290 | <i>L. major</i> | 59  | 661  | 719  |
| LmjF27.2300 | <i>L. major</i> | 172 | 1    | 172  |
| LmjF27.2300 | <i>L. major</i> | 51  | 650  | 700  |
| LmjF27.2305 | <i>L. major</i> | 53  | 26   | 78   |
| LmjF27.2310 | <i>L. major</i> | 53  | 69   | 121  |
| LmjF27.2335 | <i>L. major</i> | 57  | 56   | 112  |
| LmjF27.2350 | <i>L. major</i> | 48  | 99   | 146  |
| LmjF27.2360 | <i>L. major</i> | 85  | 301  | 385  |
| LmjF27.2390 | <i>L. major</i> | 94  | 1    | 94   |
| LmjF27.2390 | <i>L. major</i> | 207 | 184  | 390  |
| LmjF27.2400 | <i>L. major</i> | 54  | 53   | 106  |
| LmjF27.2400 | <i>L. major</i> | 50  | 347  | 396  |
| LmjF27.2400 | <i>L. major</i> | 50  | 347  | 396  |
| LmjF27.2420 | <i>L. major</i> | 47  | 83   | 129  |
| LmjF27.2420 | <i>L. major</i> | 48  | 159  | 206  |
| LmjF27.2420 | <i>L. major</i> | 48  | 159  | 206  |
| LmjF27.2430 | <i>L. major</i> | 149 | 1    | 149  |
| LmjF27.2430 | <i>L. major</i> | 348 | 213  | 560  |
| LmjF27.2450 | <i>L. major</i> | 77  | 182  | 258  |
| LmjF27.2450 | <i>L. major</i> | 151 | 297  | 447  |
| LmjF27.2450 | <i>L. major</i> | 151 | 297  | 447  |
| LmjF27.2470 | <i>L. major</i> | 78  | 484  | 561  |
| LmjF27.2480 | <i>L. major</i> | 103 | 127  | 229  |
| LmjF27.2490 | <i>L. major</i> | 57  | 1    | 57   |
| LmjF27.2490 | <i>L. major</i> | 71  | 381  | 451  |
| LmjF27.2500 | <i>L. major</i> | 137 | 1    | 137  |
| LmjF27.2590 | <i>L. major</i> | 47  | 1    | 47   |



|             |                 |     |      |      |
|-------------|-----------------|-----|------|------|
| LmjF27.2590 | <i>L. major</i> | 88  | 65   | 152  |
| LmjF27.2590 | <i>L. major</i> | 57  | 596  | 652  |
| LmjF27.2590 | <i>L. major</i> | 110 | 2874 | 2983 |
| LmjF27.2590 | <i>L. major</i> | 74  | 3417 | 3490 |
| LmjF27.2610 | <i>L. major</i> | 97  | 1    | 97   |
| LmjF27.2610 | <i>L. major</i> | 52  | 125  | 176  |
| LmjF27.2610 | <i>L. major</i> | 76  | 194  | 269  |
| LmjF27.2620 | <i>L. major</i> | 54  | 1    | 54   |
| LmjF27.2620 | <i>L. major</i> | 162 | 116  | 277  |
| LmjF27.2620 | <i>L. major</i> | 61  | 280  | 340  |
| LmjF27.2620 | <i>L. major</i> | 75  | 350  | 424  |
| LmjF27.2620 | <i>L. major</i> | 120 | 595  | 714  |
| LmjF27.2620 | <i>L. major</i> | 157 | 781  | 937  |
| LmjF27.2630 | <i>L. major</i> | 102 | 1    | 102  |
| LmjF27.2630 | <i>L. major</i> | 88  | 335  | 422  |
| LmjF27.2630 | <i>L. major</i> | 88  | 335  | 422  |
| LmjF27.2660 | <i>L. major</i> | 53  | 1    | 53   |
| LmjF28.0010 | <i>L. major</i> | 70  | 481  | 550  |
| LmjF28.0040 | <i>L. major</i> | 225 | 1    | 225  |
| LmjF28.0040 | <i>L. major</i> | 68  | 227  | 294  |
| LmjF28.0040 | <i>L. major</i> | 59  | 436  | 494  |
| LmjF28.0050 | <i>L. major</i> | 267 | 110  | 376  |
| LmjF28.0060 | <i>L. major</i> | 68  | 1    | 68   |
| LmjF28.0080 | <i>L. major</i> | 91  | 39   | 129  |
| LmjF28.0150 | <i>L. major</i> | 41  | 488  | 528  |
| LmjF28.0160 | <i>L. major</i> | 74  | 1    | 74   |
| LmjF28.0170 | <i>L. major</i> | 99  | 1    | 99   |
| LmjF28.0190 | <i>L. major</i> | 48  | 1    | 48   |
| LmjF28.0190 | <i>L. major</i> | 154 | 165  | 318  |
| LmjF28.0190 | <i>L. major</i> | 69  | 392  | 460  |
| LmjF28.0200 | <i>L. major</i> | 96  | 67   | 162  |
| LmjF28.0210 | <i>L. major</i> | 46  | 1    | 46   |
| LmjF28.0220 | <i>L. major</i> | 60  | 9    | 68   |
| LmjF28.0230 | <i>L. major</i> | 172 | 1    | 172  |
| LmjF28.0230 | <i>L. major</i> | 94  | 178  | 271  |
| LmjF28.0260 | <i>L. major</i> | 46  | 118  | 163  |
| LmjF28.0260 | <i>L. major</i> | 77  | 845  | 921  |
| LmjF28.0260 | <i>L. major</i> | 77  | 845  | 921  |
| LmjF28.0270 | <i>L. major</i> | 43  | 173  | 215  |
| LmjF28.0280 | <i>L. major</i> | 82  | 73   | 154  |
| LmjF28.0290 | <i>L. major</i> | 50  | 138  | 187  |
| LmjF28.0300 | <i>L. major</i> | 120 | 1    | 120  |
| LmjF28.0300 | <i>L. major</i> | 118 | 295  | 412  |
| LmjF28.0300 | <i>L. major</i> | 62  | 481  | 542  |
| LmjF28.0300 | <i>L. major</i> | 60  | 572  | 631  |
| LmjF28.0330 | <i>L. major</i> | 60  | 861  | 920  |
| LmjF28.0390 | <i>L. major</i> | 79  | 1    | 79   |

|             |                 |     |      |      |
|-------------|-----------------|-----|------|------|
| LmjF28.0390 | <i>L. major</i> | 51  | 100  | 150  |
| LmjF28.0390 | <i>L. major</i> | 46  | 177  | 222  |
| LmjF28.0390 | <i>L. major</i> | 139 | 227  | 365  |
| LmjF28.0390 | <i>L. major</i> | 59  | 466  | 524  |
| LmjF28.0390 | <i>L. major</i> | 69  | 723  | 791  |
| LmjF28.0390 | <i>L. major</i> | 106 | 824  | 929  |
| LmjF28.0400 | <i>L. major</i> | 158 | 77   | 234  |
| LmjF28.0410 | <i>L. major</i> | 44  | 34   | 77   |
| LmjF28.0410 | <i>L. major</i> | 70  | 284  | 353  |
| LmjF28.0430 | <i>L. major</i> | 64  | 1    | 64   |
| LmjF28.0430 | <i>L. major</i> | 53  | 230  | 282  |
| LmjF28.0430 | <i>L. major</i> | 53  | 230  | 282  |
| LmjF28.0440 | <i>L. major</i> | 44  | 233  | 276  |
| LmjF28.0440 | <i>L. major</i> | 41  | 469  | 509  |
| LmjF28.0440 | <i>L. major</i> | 41  | 469  | 509  |
| LmjF28.0450 | <i>L. major</i> | 56  | 81   | 136  |
| LmjF28.0450 | <i>L. major</i> | 56  | 814  | 869  |
| LmjF28.0460 | <i>L. major</i> | 99  | 1    | 99   |
| LmjF28.0460 | <i>L. major</i> | 72  | 240  | 311  |
| LmjF28.0470 | <i>L. major</i> | 55  | 707  | 761  |
| LmjF28.0480 | <i>L. major</i> | 169 | 367  | 535  |
| LmjF28.0485 | <i>L. major</i> | 42  | 49   | 90   |
| LmjF28.0485 | <i>L. major</i> | 81  | 147  | 227  |
| LmjF28.0485 | <i>L. major</i> | 81  | 147  | 227  |
| LmjF28.0490 | <i>L. major</i> | 59  | 1    | 59   |
| LmjF28.0500 | <i>L. major</i> | 45  | 1    | 45   |
| LmjF28.0500 | <i>L. major</i> | 121 | 135  | 255  |
| LmjF28.0500 | <i>L. major</i> | 121 | 135  | 255  |
| LmjF28.0510 | <i>L. major</i> | 45  | 341  | 385  |
| LmjF28.0530 | <i>L. major</i> | 358 | 198  | 555  |
| LmjF28.0530 | <i>L. major</i> | 70  | 571  | 640  |
| LmjF28.0530 | <i>L. major</i> | 45  | 701  | 745  |
| LmjF28.0530 | <i>L. major</i> | 291 | 819  | 1109 |
| LmjF28.0550 | <i>L. major</i> | 58  | 1    | 58   |
| LmjF28.0560 | <i>L. major</i> | 50  | 165  | 214  |
| LmjF28.0560 | <i>L. major</i> | 41  | 246  | 286  |
| LmjF28.0560 | <i>L. major</i> | 41  | 246  | 286  |
| LmjF28.0580 | <i>L. major</i> | 70  | 146  | 215  |
| LmjF28.0580 | <i>L. major</i> | 57  | 301  | 357  |
| LmjF28.0580 | <i>L. major</i> | 614 | 404  | 1017 |
| LmjF28.0580 | <i>L. major</i> | 452 | 1037 | 1488 |
| LmjF28.0580 | <i>L. major</i> | 73  | 1507 | 1579 |
| LmjF28.0590 | <i>L. major</i> | 90  | 1    | 90   |
| LmjF28.0590 | <i>L. major</i> | 196 | 127  | 322  |
| LmjF28.0590 | <i>L. major</i> | 52  | 353  | 404  |
| LmjF28.0590 | <i>L. major</i> | 95  | 407  | 501  |
| LmjF28.0610 | <i>L. major</i> | 97  | 1    | 97   |

|             |                 |     |      |      |
|-------------|-----------------|-----|------|------|
| LmjF28.0610 | <i>L. major</i> | 57  | 817  | 873  |
| LmjF28.0610 | <i>L. major</i> | 109 | 2770 | 2878 |
| LmjF28.0610 | <i>L. major</i> | 78  | 3313 | 3390 |
| LmjF28.0620 | <i>L. major</i> | 134 | 297  | 430  |
| LmjF28.0620 | <i>L. major</i> | 66  | 1226 | 1291 |
| LmjF28.0670 | <i>L. major</i> | 40  | 80   | 119  |
| LmjF28.0680 | <i>L. major</i> | 92  | 142  | 233  |
| LmjF28.0700 | <i>L. major</i> | 166 | 251  | 416  |
| LmjF28.0705 | <i>L. major</i> | 133 | 117  | 249  |
| LmjF28.0720 | <i>L. major</i> | 40  | 1    | 40   |
| LmjF28.0720 | <i>L. major</i> | 104 | 43   | 146  |
| LmjF28.0720 | <i>L. major</i> | 294 | 267  | 560  |
| LmjF28.0740 | <i>L. major</i> | 51  | 69   | 119  |
| LmjF28.0740 | <i>L. major</i> | 122 | 181  | 302  |
| LmjF28.0740 | <i>L. major</i> | 43  | 352  | 394  |
| LmjF28.0760 | <i>L. major</i> | 77  | 660  | 736  |
| LmjF28.0780 | <i>L. major</i> | 44  | 41   | 84   |
| LmjF28.0780 | <i>L. major</i> | 64  | 377  | 440  |
| LmjF28.0780 | <i>L. major</i> | 64  | 377  | 440  |
| LmjF28.0785 | <i>L. major</i> | 41  | 150  | 190  |
| LmjF28.0820 | <i>L. major</i> | 107 | 8    | 114  |
| LmjF28.0820 | <i>L. major</i> | 296 | 195  | 490  |
| LmjF28.0822 | <i>L. major</i> | 49  | 119  | 167  |
| LmjF28.0825 | <i>L. major</i> | 82  | 61   | 142  |
| LmjF28.0830 | <i>L. major</i> | 75  | 29   | 103  |
| LmjF28.0835 | <i>L. major</i> | 65  | 48   | 112  |
| LmjF28.0840 | <i>L. major</i> | 56  | 1    | 56   |
| LmjF28.0840 | <i>L. major</i> | 72  | 173  | 244  |
| LmjF28.0840 | <i>L. major</i> | 78  | 781  | 858  |
| LmjF28.0850 | <i>L. major</i> | 183 | 1    | 183  |
| LmjF28.0850 | <i>L. major</i> | 74  | 706  | 779  |
| LmjF28.0860 | <i>L. major</i> | 366 | 71   | 436  |
| LmjF28.0870 | <i>L. major</i> | 116 | 99   | 214  |
| LmjF28.0900 | <i>L. major</i> | 66  | 45   | 110  |
| LmjF28.0900 | <i>L. major</i> | 173 | 118  | 290  |
| LmjF28.0900 | <i>L. major</i> | 173 | 118  | 290  |
| LmjF28.0910 | <i>L. major</i> | 48  | 1    | 48   |
| LmjF28.0910 | <i>L. major</i> | 251 | 59   | 309  |
| LmjF28.0910 | <i>L. major</i> | 192 | 400  | 591  |
| LmjF28.0910 | <i>L. major</i> | 88  | 727  | 814  |
| LmjF28.0910 | <i>L. major</i> | 516 | 847  | 1362 |
| LmjF28.0920 | <i>L. major</i> | 64  | 126  | 189  |
| LmjF28.0930 | <i>L. major</i> | 43  | 141  | 183  |
| LmjF28.0930 | <i>L. major</i> | 77  | 335  | 411  |
| LmjF28.0930 | <i>L. major</i> | 77  | 335  | 411  |
| LmjF28.0940 | <i>L. major</i> | 121 | 95   | 215  |
| LmjF28.0940 | <i>L. major</i> | 68  | 224  | 291  |

|             |                 |     |      |      |
|-------------|-----------------|-----|------|------|
| LmjF28.0960 | <i>L. major</i> | 49  | 96   | 144  |
| LmjF28.0970 | <i>L. major</i> | 50  | 82   | 131  |
| LmjF28.1000 | <i>L. major</i> | 46  | 147  | 192  |
| LmjF28.1000 | <i>L. major</i> | 49  | 636  | 684  |
| LmjF28.1000 | <i>L. major</i> | 69  | 863  | 931  |
| LmjF28.1020 | <i>L. major</i> | 42  | 1    | 42   |
| LmjF28.1020 | <i>L. major</i> | 82  | 165  | 246  |
| LmjF28.1020 | <i>L. major</i> | 40  | 337  | 376  |
| LmjF28.1040 | <i>L. major</i> | 112 | 1    | 112  |
| LmjF28.1040 | <i>L. major</i> | 83  | 114  | 196  |
| LmjF28.1040 | <i>L. major</i> | 94  | 254  | 347  |
| LmjF28.1040 | <i>L. major</i> | 160 | 400  | 559  |
| LmjF28.1040 | <i>L. major</i> | 259 | 581  | 839  |
| LmjF28.1050 | <i>L. major</i> | 69  | 1    | 69   |
| LmjF28.1050 | <i>L. major</i> | 57  | 181  | 237  |
| LmjF28.1050 | <i>L. major</i> | 62  | 311  | 372  |
| LmjF28.1060 | <i>L. major</i> | 405 | 1    | 405  |
| LmjF28.1070 | <i>L. major</i> | 332 | 1    | 332  |
| LmjF28.1070 | <i>L. major</i> | 41  | 632  | 672  |
| LmjF28.1070 | <i>L. major</i> | 57  | 722  | 778  |
| LmjF28.1070 | <i>L. major</i> | 44  | 806  | 849  |
| LmjF28.1070 | <i>L. major</i> | 84  | 943  | 1026 |
| LmjF28.1070 | <i>L. major</i> | 72  | 1100 | 1171 |
| LmjF28.1070 | <i>L. major</i> | 48  | 1253 | 1300 |
| LmjF28.1080 | <i>L. major</i> | 75  | 417  | 491  |
| LmjF28.1080 | <i>L. major</i> | 91  | 523  | 613  |
| LmjF28.1090 | <i>L. major</i> | 44  | 431  | 474  |
| LmjF28.1090 | <i>L. major</i> | 60  | 671  | 730  |
| LmjF28.1090 | <i>L. major</i> | 60  | 671  | 730  |
| LmjF28.1100 | <i>L. major</i> | 208 | 198  | 405  |
| LmjF28.1100 | <i>L. major</i> | 54  | 490  | 543  |
| LmjF28.1100 | <i>L. major</i> | 52  | 711  | 762  |
| LmjF28.1130 | <i>L. major</i> | 84  | 1    | 84   |
| LmjF28.1150 | <i>L. major</i> | 63  | 252  | 314  |
| LmjF28.1150 | <i>L. major</i> | 42  | 516  | 557  |
| LmjF28.1180 | <i>L. major</i> | 90  | 82   | 171  |
| LmjF28.1200 | <i>L. major</i> | 113 | 515  | 627  |
| LmjF28.1210 | <i>L. major</i> | 273 | 9    | 281  |
| LmjF28.1210 | <i>L. major</i> | 293 | 307  | 599  |
| LmjF28.1210 | <i>L. major</i> | 55  | 610  | 664  |
| LmjF28.1210 | <i>L. major</i> | 44  | 700  | 743  |
| LmjF28.1220 | <i>L. major</i> | 145 | 165  | 309  |
| LmjF28.1220 | <i>L. major</i> | 69  | 404  | 472  |
| LmjF28.1250 | <i>L. major</i> | 127 | 100  | 226  |
| LmjF28.1250 | <i>L. major</i> | 117 | 322  | 438  |
| LmjF28.1260 | <i>L. major</i> | 116 | 1    | 116  |
| LmjF28.1260 | <i>L. major</i> | 123 | 145  | 267  |

|             |                 |     |      |      |
|-------------|-----------------|-----|------|------|
| LmjF28.1260 | <i>L. major</i> | 90  | 280  | 369  |
| LmjF28.1260 | <i>L. major</i> | 63  | 392  | 454  |
| LmjF28.1260 | <i>L. major</i> | 42  | 458  | 499  |
| LmjF28.1260 | <i>L. major</i> | 55  | 759  | 813  |
| LmjF28.1260 | <i>L. major</i> | 53  | 853  | 905  |
| LmjF28.1260 | <i>L. major</i> | 108 | 1003 | 1110 |
| LmjF28.1270 | <i>L. major</i> | 88  | 97   | 184  |
| LmjF28.1270 | <i>L. major</i> | 53  | 291  | 343  |
| LmjF28.1290 | <i>L. major</i> | 62  | 258  | 319  |
| LmjF28.1290 | <i>L. major</i> | 58  | 346  | 403  |
| LmjF28.1300 | <i>L. major</i> | 146 | 1    | 146  |
| LmjF28.1310 | <i>L. major</i> | 74  | 1    | 74   |
| LmjF28.1310 | <i>L. major</i> | 82  | 538  | 619  |
| LmjF28.1310 | <i>L. major</i> | 264 | 637  | 900  |
| LmjF28.1320 | <i>L. major</i> | 59  | 1    | 59   |
| LmjF28.1330 | <i>L. major</i> | 72  | 1    | 72   |
| LmjF28.1330 | <i>L. major</i> | 110 | 91   | 200  |
| LmjF28.1380 | <i>L. major</i> | 48  | 97   | 144  |
| LmjF28.1390 | <i>L. major</i> | 112 | 1    | 112  |
| LmjF28.1400 | <i>L. major</i> | 292 | 1    | 292  |
| LmjF28.1405 | <i>L. major</i> | 339 | 60   | 398  |
| LmjF28.1410 | <i>L. major</i> | 143 | 1    | 143  |
| LmjF28.1410 | <i>L. major</i> | 47  | 146  | 192  |
| LmjF28.1410 | <i>L. major</i> | 151 | 601  | 751  |
| LmjF28.1420 | <i>L. major</i> | 64  | 1    | 64   |
| LmjF28.1420 | <i>L. major</i> | 52  | 78   | 129  |
| LmjF28.1420 | <i>L. major</i> | 109 | 490  | 598  |
| LmjF28.1430 | <i>L. major</i> | 64  | 215  | 278  |
| LmjF28.1440 | <i>L. major</i> | 58  | 1    | 58   |
| LmjF28.1440 | <i>L. major</i> | 68  | 296  | 363  |
| LmjF28.1440 | <i>L. major</i> | 68  | 296  | 363  |
| LmjF28.1450 | <i>L. major</i> | 143 | 1    | 143  |
| LmjF28.1450 | <i>L. major</i> | 98  | 184  | 281  |
| LmjF28.1450 | <i>L. major</i> | 52  | 290  | 341  |
| LmjF28.1450 | <i>L. major</i> | 44  | 479  | 522  |
| LmjF28.1450 | <i>L. major</i> | 61  | 550  | 610  |
| LmjF28.1450 | <i>L. major</i> | 75  | 639  | 713  |
| LmjF28.1460 | <i>L. major</i> | 46  | 517  | 562  |
| LmjF28.1470 | <i>L. major</i> | 62  | 1    | 62   |
| LmjF28.1470 | <i>L. major</i> | 50  | 90   | 139  |
| LmjF28.1480 | <i>L. major</i> | 62  | 1    | 62   |
| LmjF28.1480 | <i>L. major</i> | 50  | 90   | 139  |
| LmjF28.1515 | <i>L. major</i> | 160 | 1    | 160  |
| LmjF28.1520 | <i>L. major</i> | 122 | 139  | 260  |
| LmjF28.1520 | <i>L. major</i> | 353 | 289  | 641  |
| LmjF28.1520 | <i>L. major</i> | 353 | 289  | 641  |
| LmjF28.1540 | <i>L. major</i> | 69  | 1    | 69   |

|             |                 |     |      |      |
|-------------|-----------------|-----|------|------|
| LmjF28.1540 | <i>L. major</i> | 62  | 75   | 136  |
| LmjF28.1540 | <i>L. major</i> | 102 | 167  | 268  |
| LmjF28.1540 | <i>L. major</i> | 92  | 272  | 363  |
| LmjF28.1540 | <i>L. major</i> | 90  | 588  | 677  |
| LmjF28.1540 | <i>L. major</i> | 46  | 682  | 727  |
| LmjF28.1540 | <i>L. major</i> | 94  | 763  | 856  |
| LmjF28.1560 | <i>L. major</i> | 186 | 27   | 212  |
| LmjF28.1560 | <i>L. major</i> | 117 | 237  | 353  |
| LmjF28.1560 | <i>L. major</i> | 154 | 408  | 561  |
| LmjF28.1600 | <i>L. major</i> | 48  | 1    | 48   |
| LmjF28.1600 | <i>L. major</i> | 76  | 91   | 166  |
| LmjF28.1600 | <i>L. major</i> | 48  | 469  | 516  |
| LmjF28.1600 | <i>L. major</i> | 59  | 942  | 1000 |
| LmjF28.1600 | <i>L. major</i> | 58  | 1015 | 1072 |
| LmjF28.1610 | <i>L. major</i> | 110 | 36   | 145  |
| LmjF28.1610 | <i>L. major</i> | 165 | 198  | 362  |
| LmjF28.1610 | <i>L. major</i> | 165 | 198  | 362  |
| LmjF28.1620 | <i>L. major</i> | 190 | 48   | 237  |
| LmjF28.1620 | <i>L. major</i> | 46  | 730  | 775  |
| LmjF28.1620 | <i>L. major</i> | 67  | 782  | 848  |
| LmjF28.1630 | <i>L. major</i> | 42  | 253  | 294  |
| LmjF28.1630 | <i>L. major</i> | 61  | 435  | 495  |
| LmjF28.1630 | <i>L. major</i> | 94  | 532  | 625  |
| LmjF28.1640 | <i>L. major</i> | 51  | 1    | 51   |
| LmjF28.1640 | <i>L. major</i> | 50  | 161  | 210  |
| LmjF28.1640 | <i>L. major</i> | 59  | 314  | 372  |
| LmjF28.1640 | <i>L. major</i> | 102 | 433  | 534  |
| LmjF28.1640 | <i>L. major</i> | 490 | 757  | 1246 |
| LmjF28.1640 | <i>L. major</i> | 100 | 1260 | 1359 |
| LmjF28.1650 | <i>L. major</i> | 260 | 226  | 485  |
| LmjF28.1650 | <i>L. major</i> | 243 | 508  | 750  |
| LmjF28.1660 | <i>L. major</i> | 53  | 62   | 114  |
| LmjF28.1660 | <i>L. major</i> | 159 | 147  | 305  |
| LmjF28.1670 | <i>L. major</i> | 86  | 1    | 86   |
| LmjF28.1670 | <i>L. major</i> | 195 | 256  | 450  |
| LmjF28.1670 | <i>L. major</i> | 100 | 539  | 638  |
| LmjF28.1670 | <i>L. major</i> | 62  | 987  | 1048 |
| LmjF28.1670 | <i>L. major</i> | 126 | 1186 | 1311 |
| LmjF28.1690 | <i>L. major</i> | 106 | 621  | 726  |
| LmjF28.1690 | <i>L. major</i> | 65  | 839  | 903  |
| LmjF28.1690 | <i>L. major</i> | 96  | 1051 | 1146 |
| LmjF28.1690 | <i>L. major</i> | 179 | 1198 | 1376 |
| LmjF28.1690 | <i>L. major</i> | 90  | 1705 | 1794 |
| LmjF28.1690 | <i>L. major</i> | 131 | 1821 | 1951 |
| LmjF28.1700 | <i>L. major</i> | 95  | 1    | 95   |
| LmjF28.1700 | <i>L. major</i> | 55  | 167  | 221  |
| LmjF28.1700 | <i>L. major</i> | 41  | 312  | 352  |

|             |                 |     |      |      |
|-------------|-----------------|-----|------|------|
| LmjF28.1700 | <i>L. major</i> | 77  | 395  | 471  |
| LmjF28.1710 | <i>L. major</i> | 70  | 1    | 70   |
| LmjF28.1710 | <i>L. major</i> | 53  | 101  | 153  |
| LmjF28.1710 | <i>L. major</i> | 223 | 197  | 419  |
| LmjF28.1710 | <i>L. major</i> | 130 | 439  | 568  |
| LmjF28.1710 | <i>L. major</i> | 135 | 600  | 734  |
| LmjF28.1710 | <i>L. major</i> | 84  | 764  | 847  |
| LmjF28.1710 | <i>L. major</i> | 227 | 905  | 1131 |
| LmjF28.1710 | <i>L. major</i> | 420 | 1169 | 1588 |
| LmjF28.1710 | <i>L. major</i> | 45  | 1598 | 1642 |
| LmjF28.1710 | <i>L. major</i> | 210 | 1670 | 1879 |
| LmjF28.1710 | <i>L. major</i> | 92  | 2082 | 2173 |
| LmjF28.1720 | <i>L. major</i> | 147 | 7    | 153  |
| LmjF28.1730 | <i>L. major</i> | 104 | 803  | 906  |
| LmjF28.1740 | <i>L. major</i> | 128 | 114  | 241  |
| LmjF28.1740 | <i>L. major</i> | 41  | 275  | 315  |
| LmjF28.1740 | <i>L. major</i> | 90  | 398  | 487  |
| LmjF28.1750 | <i>L. major</i> | 71  | 72   | 142  |
| LmjF28.1750 | <i>L. major</i> | 128 | 200  | 327  |
| LmjF28.1750 | <i>L. major</i> | 69  | 376  | 444  |
| LmjF28.1750 | <i>L. major</i> | 42  | 512  | 553  |
| LmjF28.1750 | <i>L. major</i> | 61  | 565  | 625  |
| LmjF28.1750 | <i>L. major</i> | 72  | 642  | 713  |
| LmjF28.1750 | <i>L. major</i> | 84  | 841  | 924  |
| LmjF28.1760 | <i>L. major</i> | 145 | 517  | 661  |
| LmjF28.1760 | <i>L. major</i> | 149 | 870  | 1018 |
| LmjF28.1760 | <i>L. major</i> | 119 | 1031 | 1149 |
| LmjF28.1770 | <i>L. major</i> | 177 | 85   | 261  |
| LmjF28.1780 | <i>L. major</i> | 40  | 687  | 726  |
| LmjF28.1780 | <i>L. major</i> | 41  | 826  | 866  |
| LmjF28.1780 | <i>L. major</i> | 41  | 826  | 866  |
| LmjF28.1790 | <i>L. major</i> | 41  | 118  | 158  |
| LmjF28.1800 | <i>L. major</i> | 137 | 1    | 137  |
| LmjF28.1800 | <i>L. major</i> | 98  | 302  | 399  |
| LmjF28.1800 | <i>L. major</i> | 85  | 472  | 556  |
| LmjF28.1800 | <i>L. major</i> | 80  | 687  | 766  |
| LmjF28.1800 | <i>L. major</i> | 42  | 1134 | 1175 |
| LmjF28.1800 | <i>L. major</i> | 45  | 1225 | 1269 |
| LmjF28.1800 | <i>L. major</i> | 53  | 1315 | 1367 |
| LmjF28.1800 | <i>L. major</i> | 113 | 1401 | 1513 |
| LmjF28.1800 | <i>L. major</i> | 91  | 1546 | 1636 |
| LmjF28.1800 | <i>L. major</i> | 115 | 1666 | 1780 |
| LmjF28.1800 | <i>L. major</i> | 65  | 2030 | 2094 |
| LmjF28.1800 | <i>L. major</i> | 80  | 2181 | 2260 |
| LmjF28.1800 | <i>L. major</i> | 43  | 2391 | 2433 |
| LmjF28.1810 | <i>L. major</i> | 67  | 34   | 100  |
| LmjF28.1820 | <i>L. major</i> | 58  | 393  | 450  |

|             |                 |     |      |      |
|-------------|-----------------|-----|------|------|
| LmjF28.1830 | <i>L. major</i> | 119 | 56   | 174  |
| LmjF28.1830 | <i>L. major</i> | 51  | 539  | 589  |
| LmjF28.1830 | <i>L. major</i> | 61  | 657  | 717  |
| LmjF28.1830 | <i>L. major</i> | 48  | 875  | 922  |
| LmjF28.1850 | <i>L. major</i> | 85  | 1    | 85   |
| LmjF28.1850 | <i>L. major</i> | 96  | 89   | 184  |
| LmjF28.1850 | <i>L. major</i> | 175 | 253  | 427  |
| LmjF28.1860 | <i>L. major</i> | 53  | 165  | 217  |
| LmjF28.1870 | <i>L. major</i> | 148 | 148  | 295  |
| LmjF28.1870 | <i>L. major</i> | 68  | 326  | 393  |
| LmjF28.1880 | <i>L. major</i> | 69  | 1    | 69   |
| LmjF28.1880 | <i>L. major</i> | 145 | 377  | 521  |
| LmjF28.1880 | <i>L. major</i> | 289 | 537  | 825  |
| LmjF28.1880 | <i>L. major</i> | 43  | 1110 | 1152 |
| LmjF28.1880 | <i>L. major</i> | 84  | 1178 | 1261 |
| LmjF28.1890 | <i>L. major</i> | 46  | 78   | 123  |
| LmjF28.1900 | <i>L. major</i> | 451 | 205  | 655  |
| LmjF28.1910 | <i>L. major</i> | 340 | 1    | 340  |
| LmjF28.1910 | <i>L. major</i> | 72  | 529  | 600  |
| LmjF28.1920 | <i>L. major</i> | 113 | 1    | 113  |
| LmjF28.1930 | <i>L. major</i> | 43  | 27   | 69   |
| LmjF28.1930 | <i>L. major</i> | 55  | 203  | 257  |
| LmjF28.1930 | <i>L. major</i> | 55  | 203  | 257  |
| LmjF28.1940 | <i>L. major</i> | 58  | 1    | 58   |
| LmjF28.1940 | <i>L. major</i> | 68  | 95   | 162  |
| LmjF28.1940 | <i>L. major</i> | 44  | 199  | 242  |
| LmjF28.1940 | <i>L. major</i> | 43  | 323  | 365  |
| LmjF28.1940 | <i>L. major</i> | 55  | 391  | 445  |
| LmjF28.1960 | <i>L. major</i> | 115 | 166  | 280  |
| LmjF28.1960 | <i>L. major</i> | 54  | 543  | 596  |
| LmjF28.1960 | <i>L. major</i> | 54  | 543  | 596  |
| LmjF28.1970 | <i>L. major</i> | 40  | 133  | 172  |
| LmjF28.1980 | <i>L. major</i> | 219 | 283  | 501  |
| LmjF28.1980 | <i>L. major</i> | 53  | 571  | 623  |
| LmjF28.1980 | <i>L. major</i> | 45  | 924  | 968  |
| LmjF28.1980 | <i>L. major</i> | 71  | 1108 | 1178 |
| LmjF28.1980 | <i>L. major</i> | 115 | 1244 | 1358 |
| LmjF28.1990 | <i>L. major</i> | 263 | 360  | 622  |
| LmjF28.1990 | <i>L. major</i> | 108 | 640  | 747  |
| LmjF28.2000 | <i>L. major</i> | 226 | 301  | 526  |
| LmjF28.2000 | <i>L. major</i> | 51  | 588  | 638  |
| LmjF28.2000 | <i>L. major</i> | 209 | 669  | 877  |
| LmjF28.2010 | <i>L. major</i> | 71  | 58   | 128  |
| LmjF28.2010 | <i>L. major</i> | 45  | 398  | 442  |
| LmjF28.2010 | <i>L. major</i> | 45  | 398  | 442  |
| LmjF28.2020 | <i>L. major</i> | 265 | 27   | 291  |
| LmjF28.2020 | <i>L. major</i> | 239 | 327  | 565  |



|             |                 |     |      |      |
|-------------|-----------------|-----|------|------|
| LmjF28.2050 | <i>L. major</i> | 41  | 148  | 188  |
| LmjF28.2050 | <i>L. major</i> | 44  | 925  | 968  |
| LmjF28.2050 | <i>L. major</i> | 44  | 925  | 968  |
| LmjF28.2080 | <i>L. major</i> | 69  | 476  | 544  |
| LmjF28.2110 | <i>L. major</i> | 59  | 305  | 363  |
| LmjF28.2140 | <i>L. major</i> | 47  | 455  | 501  |
| LmjF28.2150 | <i>L. major</i> | 119 | 1    | 119  |
| LmjF28.2150 | <i>L. major</i> | 60  | 523  | 582  |
| LmjF28.2150 | <i>L. major</i> | 52  | 637  | 688  |
| LmjF28.2170 | <i>L. major</i> | 128 | 115  | 242  |
| LmjF28.2170 | <i>L. major</i> | 123 | 473  | 595  |
| LmjF28.2180 | <i>L. major</i> | 75  | 1    | 75   |
| LmjF28.2190 | <i>L. major</i> | 191 | 1    | 191  |
| LmjF28.2190 | <i>L. major</i> | 45  | 249  | 293  |
| LmjF28.2190 | <i>L. major</i> | 82  | 348  | 429  |
| LmjF28.2190 | <i>L. major</i> | 447 | 466  | 912  |
| LmjF28.2200 | <i>L. major</i> | 41  | 1    | 41   |
| LmjF28.2200 | <i>L. major</i> | 62  | 581  | 642  |
| LmjF28.2200 | <i>L. major</i> | 48  | 670  | 717  |
| LmjF28.2210 | <i>L. major</i> | 716 | 1    | 716  |
| LmjF28.2230 | <i>L. major</i> | 59  | 35   | 93   |
| LmjF28.2230 | <i>L. major</i> | 369 | 113  | 481  |
| LmjF28.2230 | <i>L. major</i> | 66  | 490  | 555  |
| LmjF28.2230 | <i>L. major</i> | 116 | 565  | 680  |
| LmjF28.2240 | <i>L. major</i> | 66  | 78   | 143  |
| LmjF28.2270 | <i>L. major</i> | 149 | 374  | 522  |
| LmjF28.2280 | <i>L. major</i> | 49  | 374  | 422  |
| LmjF28.2280 | <i>L. major</i> | 83  | 1022 | 1104 |
| LmjF28.2280 | <i>L. major</i> | 48  | 1111 | 1158 |
| LmjF28.2280 | <i>L. major</i> | 325 | 1173 | 1497 |
| LmjF28.2290 | <i>L. major</i> | 121 | 511  | 631  |
| LmjF28.2290 | <i>L. major</i> | 51  | 770  | 820  |
| LmjF28.2300 | <i>L. major</i> | 307 | 1    | 307  |
| LmjF28.2300 | <i>L. major</i> | 187 | 339  | 525  |
| LmjF28.2300 | <i>L. major</i> | 53  | 536  | 588  |
| LmjF28.2310 | <i>L. major</i> | 66  | 43   | 108  |
| LmjF28.2320 | <i>L. major</i> | 57  | 1    | 57   |
| LmjF28.2320 | <i>L. major</i> | 182 | 86   | 267  |
| LmjF28.2320 | <i>L. major</i> | 586 | 308  | 893  |
| LmjF28.2330 | <i>L. major</i> | 52  | 50   | 101  |
| LmjF28.2330 | <i>L. major</i> | 108 | 153  | 260  |
| LmjF28.2330 | <i>L. major</i> | 61  | 360  | 420  |
| LmjF28.2330 | <i>L. major</i> | 139 | 473  | 611  |
| LmjF28.2330 | <i>L. major</i> | 47  | 727  | 773  |
| LmjF28.2350 | <i>L. major</i> | 70  | 216  | 285  |
| LmjF28.2380 | <i>L. major</i> | 58  | 545  | 602  |
| LmjF28.2380 | <i>L. major</i> | 46  | 738  | 783  |

|             |                 |      |      |      |
|-------------|-----------------|------|------|------|
| LmjF28.2380 | <i>L. major</i> | 70   | 1048 | 1117 |
| LmjF28.2385 | <i>L. major</i> | 40   | 202  | 241  |
| LmjF28.2385 | <i>L. major</i> | 88   | 699  | 786  |
| LmjF28.2390 | <i>L. major</i> | 1087 | 102  | 1188 |
| LmjF28.2390 | <i>L. major</i> | 145  | 1213 | 1357 |
| LmjF28.2400 | <i>L. major</i> | 54   | 294  | 347  |
| LmjF28.2410 | <i>L. major</i> | 48   | 74   | 121  |
| LmjF28.2420 | <i>L. major</i> | 88   | 91   | 178  |
| LmjF28.2440 | <i>L. major</i> | 71   | 117  | 187  |
| LmjF28.2440 | <i>L. major</i> | 102  | 228  | 329  |
| LmjF28.2440 | <i>L. major</i> | 67   | 498  | 564  |
| LmjF28.2445 | <i>L. major</i> | 72   | 1    | 72   |
| LmjF28.2450 | <i>L. major</i> | 43   | 197  | 239  |
| LmjF28.2450 | <i>L. major</i> | 43   | 344  | 386  |
| LmjF28.2450 | <i>L. major</i> | 43   | 344  | 386  |
| LmjF28.2470 | <i>L. major</i> | 42   | 251  | 292  |
| LmjF28.2480 | <i>L. major</i> | 102  | 131  | 232  |
| LmjF28.2490 | <i>L. major</i> | 122  | 1    | 122  |
| LmjF28.2490 | <i>L. major</i> | 267  | 162  | 428  |
| LmjF28.2500 | <i>L. major</i> | 125  | 1    | 125  |
| LmjF28.2520 | <i>L. major</i> | 86   | 1    | 86   |
| LmjF28.2520 | <i>L. major</i> | 78   | 245  | 322  |
| LmjF28.2520 | <i>L. major</i> | 88   | 367  | 454  |
| LmjF28.2530 | <i>L. major</i> | 84   | 1    | 84   |
| LmjF28.2530 | <i>L. major</i> | 77   | 147  | 223  |
| LmjF28.2530 | <i>L. major</i> | 129  | 529  | 657  |
| LmjF28.2540 | <i>L. major</i> | 63   | 16   | 78   |
| LmjF28.2540 | <i>L. major</i> | 168  | 91   | 258  |
| LmjF28.2540 | <i>L. major</i> | 354  | 271  | 624  |
| LmjF28.2540 | <i>L. major</i> | 45   | 724  | 768  |
| LmjF28.2540 | <i>L. major</i> | 42   | 889  | 930  |
| LmjF28.2540 | <i>L. major</i> | 40   | 1001 | 1040 |
| LmjF28.2540 | <i>L. major</i> | 52   | 1113 | 1164 |
| LmjF28.2540 | <i>L. major</i> | 45   | 1239 | 1283 |
| LmjF28.2550 | <i>L. major</i> | 100  | 222  | 321  |
| LmjF28.2550 | <i>L. major</i> | 107  | 349  | 455  |
| LmjF28.2550 | <i>L. major</i> | 56   | 582  | 637  |
| LmjF28.2550 | <i>L. major</i> | 103  | 878  | 980  |
| LmjF28.2555 | <i>L. major</i> | 75   | 69   | 143  |
| LmjF28.2560 | <i>L. major</i> | 75   | 69   | 143  |
| LmjF28.2565 | <i>L. major</i> | 163  | 57   | 219  |
| LmjF28.2570 | <i>L. major</i> | 69   | 1    | 69   |
| LmjF28.2580 | <i>L. major</i> | 43   | 134  | 176  |
| LmjF28.2580 | <i>L. major</i> | 111  | 394  | 504  |
| LmjF28.2580 | <i>L. major</i> | 89   | 568  | 656  |
| LmjF28.2580 | <i>L. major</i> | 213  | 673  | 885  |
| LmjF28.2590 | <i>L. major</i> | 59   | 64   | 122  |

|             |                 |     |      |      |
|-------------|-----------------|-----|------|------|
| LmjF28.2590 | <i>L. major</i> | 46  | 284  | 329  |
| LmjF28.2590 | <i>L. major</i> | 46  | 284  | 329  |
| LmjF28.2610 | <i>L. major</i> | 175 | 37   | 211  |
| LmjF28.2610 | <i>L. major</i> | 46  | 228  | 273  |
| LmjF28.2610 | <i>L. major</i> | 68  | 328  | 395  |
| LmjF28.2610 | <i>L. major</i> | 46  | 534  | 579  |
| LmjF28.2610 | <i>L. major</i> | 98  | 700  | 797  |
| LmjF28.2610 | <i>L. major</i> | 89  | 810  | 898  |
| LmjF28.2610 | <i>L. major</i> | 59  | 1488 | 1546 |
| LmjF28.2610 | <i>L. major</i> | 115 | 1582 | 1696 |
| LmjF28.2620 | <i>L. major</i> | 52  | 557  | 608  |
| LmjF28.2630 | <i>L. major</i> | 224 | 1    | 224  |
| LmjF28.2630 | <i>L. major</i> | 59  | 249  | 307  |
| LmjF28.2630 | <i>L. major</i> | 75  | 342  | 416  |
| LmjF28.2640 | <i>L. major</i> | 42  | 71   | 112  |
| LmjF28.2640 | <i>L. major</i> | 591 | 172  | 762  |
| LmjF28.2690 | <i>L. major</i> | 69  | 83   | 151  |
| LmjF28.2690 | <i>L. major</i> | 48  | 193  | 240  |
| LmjF28.2690 | <i>L. major</i> | 43  | 328  | 370  |
| LmjF28.2700 | <i>L. major</i> | 265 | 144  | 408  |
| LmjF28.2730 | <i>L. major</i> | 42  | 1    | 42   |
| LmjF28.2730 | <i>L. major</i> | 55  | 125  | 179  |
| LmjF28.2730 | <i>L. major</i> | 52  | 277  | 328  |
| LmjF28.2730 | <i>L. major</i> | 105 | 499  | 603  |
| LmjF28.2770 | <i>L. major</i> | 166 | 493  | 658  |
| LmjF28.2780 | <i>L. major</i> | 166 | 493  | 658  |
| LmjF28.2800 | <i>L. major</i> | 48  | 1    | 48   |
| LmjF28.2800 | <i>L. major</i> | 44  | 455  | 498  |
| LmjF28.2800 | <i>L. major</i> | 44  | 455  | 498  |
| LmjF28.2810 | <i>L. major</i> | 97  | 1    | 97   |
| LmjF28.2820 | <i>L. major</i> | 62  | 525  | 586  |
| LmjF28.2820 | <i>L. major</i> | 71  | 592  | 662  |
| LmjF28.2830 | <i>L. major</i> | 49  | 324  | 372  |
| LmjF28.2830 | <i>L. major</i> | 72  | 556  | 627  |
| LmjF28.2830 | <i>L. major</i> | 83  | 699  | 781  |
| LmjF28.2840 | <i>L. major</i> | 365 | 127  | 491  |
| LmjF28.2850 | <i>L. major</i> | 58  | 1    | 58   |
| LmjF28.2850 | <i>L. major</i> | 41  | 333  | 373  |
| LmjF28.2850 | <i>L. major</i> | 41  | 333  | 373  |
| LmjF28.2880 | <i>L. major</i> | 123 | 82   | 204  |
| LmjF28.2880 | <i>L. major</i> | 86  | 350  | 435  |
| LmjF28.2880 | <i>L. major</i> | 78  | 772  | 849  |
| LmjF28.2880 | <i>L. major</i> | 121 | 2736 | 2856 |
| LmjF28.2880 | <i>L. major</i> | 53  | 2966 | 3018 |
| LmjF28.2880 | <i>L. major</i> | 87  | 3284 | 3370 |
| LmjF28.2890 | <i>L. major</i> | 51  | 1    | 51   |
| LmjF28.2890 | <i>L. major</i> | 53  | 333  | 385  |

|             |                 |      |      |      |
|-------------|-----------------|------|------|------|
| LmjF28.2890 | <i>L. major</i> | 53   | 333  | 385  |
| LmjF28.2900 | <i>L. major</i> | 58   | 476  | 533  |
| LmjF28.2930 | <i>L. major</i> | 60   | 62   | 121  |
| LmjF28.2950 | <i>L. major</i> | 110  | 228  | 337  |
| LmjF28.2970 | <i>L. major</i> | 93   | 64   | 156  |
| LmjF28.2990 | <i>L. major</i> | 169  | 67   | 235  |
| LmjF28.3010 | <i>L. major</i> | 912  | 94   | 1005 |
| LmjF28.3030 | <i>L. major</i> | 45   | 1    | 45   |
| LmjF28.3030 | <i>L. major</i> | 207  | 121  | 327  |
| LmjF28.3030 | <i>L. major</i> | 72   | 373  | 444  |
| LmjF28.3030 | <i>L. major</i> | 209  | 484  | 692  |
| LmjF28.3030 | <i>L. major</i> | 71   | 738  | 808  |
| LmjF28.3030 | <i>L. major</i> | 187  | 851  | 1037 |
| LmjF28.3030 | <i>L. major</i> | 71   | 1083 | 1153 |
| LmjF28.3030 | <i>L. major</i> | 207  | 1196 | 1402 |
| LmjF28.3030 | <i>L. major</i> | 71   | 1448 | 1518 |
| LmjF28.3030 | <i>L. major</i> | 1627 | 1561 | 3187 |
| LmjF28.3030 | <i>L. major</i> | 71   | 3233 | 3303 |
| LmjF28.3030 | <i>L. major</i> | 372  | 3346 | 3717 |
| LmjF28.3030 | <i>L. major</i> | 72   | 3734 | 3805 |
| LmjF29.0020 | <i>L. major</i> | 68   | 438  | 505  |
| LmjF29.0020 | <i>L. major</i> | 42   | 623  | 664  |
| LmjF29.0020 | <i>L. major</i> | 51   | 738  | 788  |
| LmjF29.0020 | <i>L. major</i> | 140  | 906  | 1045 |
| LmjF29.0030 | <i>L. major</i> | 75   | 393  | 467  |
| LmjF29.0040 | <i>L. major</i> | 57   | 37   | 93   |
| LmjF29.0040 | <i>L. major</i> | 46   | 112  | 157  |
| LmjF29.0040 | <i>L. major</i> | 46   | 112  | 157  |
| LmjF29.0060 | <i>L. major</i> | 46   | 345  | 390  |
| LmjF29.0070 | <i>L. major</i> | 41   | 24   | 64   |
| LmjF29.0070 | <i>L. major</i> | 76   | 107  | 182  |
| LmjF29.0070 | <i>L. major</i> | 45   | 186  | 230  |
| LmjF29.0100 | <i>L. major</i> | 65   | 1    | 65   |
| LmjF29.0100 | <i>L. major</i> | 48   | 371  | 418  |
| LmjF29.0100 | <i>L. major</i> | 48   | 371  | 418  |
| LmjF29.0110 | <i>L. major</i> | 1039 | 1    | 1039 |
| LmjF29.0110 | <i>L. major</i> | 50   | 1124 | 1173 |
| LmjF29.0110 | <i>L. major</i> | 45   | 1857 | 1901 |
| LmjF29.0110 | <i>L. major</i> | 58   | 2371 | 2428 |
| LmjF29.0120 | <i>L. major</i> | 60   | 1    | 60   |
| LmjF29.0120 | <i>L. major</i> | 52   | 300  | 351  |
| LmjF29.0120 | <i>L. major</i> | 42   | 602  | 643  |
| LmjF29.0130 | <i>L. major</i> | 40   | 61   | 100  |
| LmjF29.0140 | <i>L. major</i> | 45   | 293  | 337  |
| LmjF29.0150 | <i>L. major</i> | 44   | 1    | 44   |
| LmjF29.0150 | <i>L. major</i> | 42   | 293  | 334  |
| LmjF29.0150 | <i>L. major</i> | 42   | 293  | 334  |

|             |                 |     |      |      |
|-------------|-----------------|-----|------|------|
| LmjF29.0170 | <i>L. major</i> | 75  | 63   | 137  |
| LmjF29.0180 | <i>L. major</i> | 137 | 1    | 137  |
| LmjF29.0180 | <i>L. major</i> | 59  | 237  | 295  |
| LmjF29.0180 | <i>L. major</i> | 154 | 327  | 480  |
| LmjF29.0190 | <i>L. major</i> | 186 | 1    | 186  |
| LmjF29.0190 | <i>L. major</i> | 354 | 202  | 555  |
| LmjF29.0190 | <i>L. major</i> | 47  | 558  | 604  |
| LmjF29.0190 | <i>L. major</i> | 68  | 832  | 899  |
| LmjF29.0190 | <i>L. major</i> | 97  | 924  | 1020 |
| LmjF29.0200 | <i>L. major</i> | 43  | 436  | 478  |
| LmjF29.0200 | <i>L. major</i> | 54  | 640  | 693  |
| LmjF29.0200 | <i>L. major</i> | 178 | 1319 | 1496 |
| LmjF29.0220 | <i>L. major</i> | 246 | 1    | 246  |
| LmjF29.0230 | <i>L. major</i> | 40  | 176  | 215  |
| LmjF29.0240 | <i>L. major</i> | 64  | 22   | 85   |
| LmjF29.0240 | <i>L. major</i> | 53  | 91   | 143  |
| LmjF29.0240 | <i>L. major</i> | 93  | 446  | 538  |
| LmjF29.0260 | <i>L. major</i> | 48  | 157  | 204  |
| LmjF29.0260 | <i>L. major</i> | 54  | 207  | 260  |
| LmjF29.0260 | <i>L. major</i> | 40  | 295  | 334  |
| LmjF29.0260 | <i>L. major</i> | 41  | 376  | 416  |
| LmjF29.0270 | <i>L. major</i> | 210 | 142  | 351  |
| LmjF29.0290 | <i>L. major</i> | 312 | 54   | 365  |
| LmjF29.0300 | <i>L. major</i> | 53  | 88   | 140  |
| LmjF29.0320 | <i>L. major</i> | 85  | 1    | 85   |
| LmjF29.0320 | <i>L. major</i> | 189 | 160  | 348  |
| LmjF29.0330 | <i>L. major</i> | 90  | 1    | 90   |
| LmjF29.0330 | <i>L. major</i> | 75  | 217  | 291  |
| LmjF29.0330 | <i>L. major</i> | 60  | 328  | 387  |
| LmjF29.0340 | <i>L. major</i> | 66  | 43   | 108  |
| LmjF29.0340 | <i>L. major</i> | 103 | 240  | 342  |
| LmjF29.0340 | <i>L. major</i> | 103 | 240  | 342  |
| LmjF29.0350 | <i>L. major</i> | 143 | 47   | 189  |
| LmjF29.0350 | <i>L. major</i> | 73  | 294  | 366  |
| LmjF29.0350 | <i>L. major</i> | 88  | 783  | 870  |
| LmjF29.0350 | <i>L. major</i> | 74  | 989  | 1062 |
| LmjF29.0350 | <i>L. major</i> | 67  | 1258 | 1324 |
| LmjF29.0370 | <i>L. major</i> | 140 | 1    | 140  |
| LmjF29.0370 | <i>L. major</i> | 82  | 211  | 292  |
| LmjF29.0370 | <i>L. major</i> | 53  | 334  | 386  |
| LmjF29.0370 | <i>L. major</i> | 110 | 421  | 530  |
| LmjF29.0370 | <i>L. major</i> | 50  | 673  | 722  |
| LmjF29.0370 | <i>L. major</i> | 211 | 848  | 1058 |
| LmjF29.0370 | <i>L. major</i> | 239 | 1069 | 1307 |
| LmjF29.0370 | <i>L. major</i> | 80  | 1309 | 1388 |
| LmjF29.0380 | <i>L. major</i> | 47  | 1    | 47   |
| LmjF29.0380 | <i>L. major</i> | 252 | 54   | 305  |

|             |                 |     |      |      |
|-------------|-----------------|-----|------|------|
| LmjF29.0380 | <i>L. major</i> | 143 | 328  | 470  |
| LmjF29.0380 | <i>L. major</i> | 135 | 480  | 614  |
| LmjF29.0390 | <i>L. major</i> | 64  | 196  | 259  |
| LmjF29.0410 | <i>L. major</i> | 52  | 28   | 79   |
| LmjF29.0410 | <i>L. major</i> | 453 | 110  | 562  |
| LmjF29.0420 | <i>L. major</i> | 125 | 96   | 220  |
| LmjF29.0420 | <i>L. major</i> | 86  | 319  | 404  |
| LmjF29.0430 | <i>L. major</i> | 45  | 520  | 564  |
| LmjF29.0450 | <i>L. major</i> | 269 | 1    | 269  |
| LmjF29.0460 | <i>L. major</i> | 125 | 1    | 125  |
| LmjF29.0460 | <i>L. major</i> | 153 | 202  | 354  |
| LmjF29.0460 | <i>L. major</i> | 355 | 377  | 731  |
| LmjF29.0470 | <i>L. major</i> | 231 | 207  | 437  |
| LmjF29.0480 | <i>L. major</i> | 150 | 1    | 150  |
| LmjF29.0500 | <i>L. major</i> | 229 | 134  | 362  |
| LmjF29.0500 | <i>L. major</i> | 80  | 375  | 454  |
| LmjF29.0500 | <i>L. major</i> | 40  | 1019 | 1058 |
| LmjF29.0500 | <i>L. major</i> | 69  | 1080 | 1148 |
| LmjF29.0520 | <i>L. major</i> | 90  | 38   | 127  |
| LmjF29.0520 | <i>L. major</i> | 55  | 170  | 224  |
| LmjF29.0520 | <i>L. major</i> | 55  | 170  | 224  |
| LmjF29.0530 | <i>L. major</i> | 160 | 1    | 160  |
| LmjF29.0530 | <i>L. major</i> | 252 | 206  | 457  |
| LmjF29.0530 | <i>L. major</i> | 184 | 480  | 663  |
| LmjF29.0530 | <i>L. major</i> | 543 | 684  | 1226 |
| LmjF29.0530 | <i>L. major</i> | 50  | 1234 | 1283 |
| LmjF29.0530 | <i>L. major</i> | 113 | 1293 | 1405 |
| LmjF29.0530 | <i>L. major</i> | 360 | 1407 | 1766 |
| LmjF29.0530 | <i>L. major</i> | 52  | 1803 | 1854 |
| LmjF29.0530 | <i>L. major</i> | 96  | 1856 | 1951 |
| LmjF29.0530 | <i>L. major</i> | 639 | 1986 | 2624 |
| LmjF29.0530 | <i>L. major</i> | 209 | 2757 | 2965 |
| LmjF29.0540 | <i>L. major</i> | 210 | 1    | 210  |
| LmjF29.0550 | <i>L. major</i> | 78  | 1    | 78   |
| LmjF29.0550 | <i>L. major</i> | 85  | 80   | 164  |
| LmjF29.0550 | <i>L. major</i> | 64  | 191  | 254  |
| LmjF29.0550 | <i>L. major</i> | 316 | 307  | 622  |
| LmjF29.0550 | <i>L. major</i> | 49  | 832  | 880  |
| LmjF29.0555 | <i>L. major</i> | 206 | 85   | 290  |
| LmjF29.0555 | <i>L. major</i> | 125 | 300  | 424  |
| LmjF29.0560 | <i>L. major</i> | 66  | 1    | 66   |
| LmjF29.0570 | <i>L. major</i> | 59  | 1    | 59   |
| LmjF29.0570 | <i>L. major</i> | 104 | 158  | 261  |
| LmjF29.0570 | <i>L. major</i> | 56  | 534  | 589  |
| LmjF29.0580 | <i>L. major</i> | 150 | 70   | 219  |
| LmjF29.0580 | <i>L. major</i> | 80  | 254  | 333  |
| LmjF29.0580 | <i>L. major</i> | 54  | 371  | 424  |

|             |                 |     |      |      |
|-------------|-----------------|-----|------|------|
| LmjF29.0580 | <i>L. major</i> | 55  | 429  | 483  |
| LmjF29.0590 | <i>L. major</i> | 43  | 88   | 130  |
| LmjF29.0590 | <i>L. major</i> | 188 | 144  | 331  |
| LmjF29.0590 | <i>L. major</i> | 58  | 701  | 758  |
| LmjF29.0590 | <i>L. major</i> | 59  | 1048 | 1106 |
| LmjF29.0600 | <i>L. major</i> | 76  | 101  | 176  |
| LmjF29.0600 | <i>L. major</i> | 145 | 204  | 348  |
| LmjF29.0600 | <i>L. major</i> | 88  | 453  | 540  |
| LmjF29.0610 | <i>L. major</i> | 83  | 57   | 139  |
| LmjF29.0610 | <i>L. major</i> | 170 | 232  | 401  |
| LmjF29.0610 | <i>L. major</i> | 193 | 424  | 616  |
| LmjF29.0630 | <i>L. major</i> | 87  | 1    | 87   |
| LmjF29.0640 | <i>L. major</i> | 102 | 49   | 150  |
| LmjF29.0640 | <i>L. major</i> | 52  | 176  | 227  |
| LmjF29.0640 | <i>L. major</i> | 52  | 176  | 227  |
| LmjF29.0650 | <i>L. major</i> | 218 | 271  | 488  |
| LmjF29.0660 | <i>L. major</i> | 91  | 44   | 134  |
| LmjF29.0660 | <i>L. major</i> | 47  | 336  | 382  |
| LmjF29.0660 | <i>L. major</i> | 56  | 416  | 471  |
| LmjF29.0660 | <i>L. major</i> | 53  | 538  | 590  |
| LmjF29.0680 | <i>L. major</i> | 269 | 5    | 273  |
| LmjF29.0680 | <i>L. major</i> | 93  | 458  | 550  |
| LmjF29.0680 | <i>L. major</i> | 176 | 636  | 811  |
| LmjF29.0700 | <i>L. major</i> | 111 | 69   | 179  |
| LmjF29.0700 | <i>L. major</i> | 67  | 215  | 281  |
| LmjF29.0700 | <i>L. major</i> | 46  | 617  | 662  |
| LmjF29.0710 | <i>L. major</i> | 62  | 351  | 412  |
| LmjF29.0730 | <i>L. major</i> | 187 | 1    | 187  |
| LmjF29.0740 | <i>L. major</i> | 54  | 320  | 373  |
| LmjF29.0750 | <i>L. major</i> | 56  | 1    | 56   |
| LmjF29.0750 | <i>L. major</i> | 315 | 108  | 422  |
| LmjF29.0750 | <i>L. major</i> | 77  | 471  | 547  |
| LmjF29.0750 | <i>L. major</i> | 74  | 604  | 677  |
| LmjF29.0760 | <i>L. major</i> | 70  | 79   | 148  |
| LmjF29.0760 | <i>L. major</i> | 51  | 721  | 771  |
| LmjF29.0770 | <i>L. major</i> | 102 | 1    | 102  |
| LmjF29.0790 | <i>L. major</i> | 126 | 34   | 159  |
| LmjF29.0790 | <i>L. major</i> | 44  | 298  | 341  |
| LmjF29.0790 | <i>L. major</i> | 44  | 438  | 481  |
| LmjF29.0790 | <i>L. major</i> | 125 | 696  | 820  |
| LmjF29.0790 | <i>L. major</i> | 75  | 883  | 957  |
| LmjF29.0790 | <i>L. major</i> | 63  | 1421 | 1483 |
| LmjF29.0790 | <i>L. major</i> | 55  | 1521 | 1575 |
| LmjF29.0800 | <i>L. major</i> | 143 | 1    | 143  |
| LmjF29.0800 | <i>L. major</i> | 44  | 209  | 252  |
| LmjF29.0800 | <i>L. major</i> | 80  | 298  | 377  |
| LmjF29.0800 | <i>L. major</i> | 206 | 445  | 650  |

|             |                 |     |      |      |
|-------------|-----------------|-----|------|------|
| LmjF29.0805 | <i>L. major</i> | 393 | 43   | 435  |
| LmjF29.0805 | <i>L. major</i> | 75  | 484  | 558  |
| LmjF29.0810 | <i>L. major</i> | 83  | 90   | 172  |
| LmjF29.0810 | <i>L. major</i> | 338 | 280  | 617  |
| LmjF29.0820 | <i>L. major</i> | 52  | 194  | 245  |
| LmjF29.0830 | <i>L. major</i> | 149 | 1    | 149  |
| LmjF29.0830 | <i>L. major</i> | 115 | 328  | 442  |
| LmjF29.0850 | <i>L. major</i> | 157 | 55   | 211  |
| LmjF29.0850 | <i>L. major</i> | 85  | 215  | 299  |
| LmjF29.0860 | <i>L. major</i> | 84  | 1    | 84   |
| LmjF29.0860 | <i>L. major</i> | 82  | 160  | 241  |
| LmjF29.0860 | <i>L. major</i> | 123 | 292  | 414  |
| LmjF29.0860 | <i>L. major</i> | 66  | 455  | 520  |
| LmjF29.0868 | <i>L. major</i> | 67  | 102  | 168  |
| LmjF29.0870 | <i>L. major</i> | 50  | 331  | 380  |
| LmjF29.0880 | <i>L. major</i> | 45  | 1    | 45   |
| LmjF29.0885 | <i>L. major</i> | 40  | 310  | 349  |
| LmjF29.0890 | <i>L. major</i> | 60  | 393  | 452  |
| LmjF29.0910 | <i>L. major</i> | 52  | 258  | 309  |
| LmjF29.0920 | <i>L. major</i> | 56  | 336  | 391  |
| LmjF29.0920 | <i>L. major</i> | 42  | 460  | 501  |
| LmjF29.0920 | <i>L. major</i> | 42  | 460  | 501  |
| LmjF29.0930 | <i>L. major</i> | 84  | 313  | 396  |
| LmjF29.0935 | <i>L. major</i> | 60  | 1    | 60   |
| LmjF29.0950 | <i>L. major</i> | 103 | 1    | 103  |
| LmjF29.0950 | <i>L. major</i> | 116 | 108  | 223  |
| LmjF29.0960 | <i>L. major</i> | 90  | 1    | 90   |
| LmjF29.0960 | <i>L. major</i> | 295 | 137  | 431  |
| LmjF29.0970 | <i>L. major</i> | 575 | 380  | 954  |
| LmjF29.0970 | <i>L. major</i> | 505 | 1036 | 1540 |
| LmjF29.0980 | <i>L. major</i> | 248 | 1    | 248  |
| LmjF29.0980 | <i>L. major</i> | 263 | 283  | 545  |
| LmjF29.0990 | <i>L. major</i> | 52  | 1    | 52   |
| LmjF29.0990 | <i>L. major</i> | 122 | 193  | 314  |
| LmjF29.0990 | <i>L. major</i> | 252 | 324  | 575  |
| LmjF29.0990 | <i>L. major</i> | 152 | 588  | 739  |
| LmjF29.0990 | <i>L. major</i> | 83  | 881  | 963  |
| LmjF29.1000 | <i>L. major</i> | 77  | 54   | 130  |
| LmjF29.1000 | <i>L. major</i> | 393 | 211  | 603  |
| LmjF29.1020 | <i>L. major</i> | 67  | 22   | 88   |
| LmjF29.1020 | <i>L. major</i> | 100 | 197  | 296  |
| LmjF29.1020 | <i>L. major</i> | 109 | 307  | 415  |
| LmjF29.1020 | <i>L. major</i> | 48  | 531  | 578  |
| LmjF29.1030 | <i>L. major</i> | 147 | 1    | 147  |
| LmjF29.1040 | <i>L. major</i> | 56  | 1    | 56   |
| LmjF29.1040 | <i>L. major</i> | 47  | 263  | 309  |
| LmjF29.1040 | <i>L. major</i> | 93  | 836  | 928  |



|             |                 |     |      |      |
|-------------|-----------------|-----|------|------|
| LmjF29.1040 | <i>L. major</i> | 77  | 975  | 1051 |
| LmjF29.1040 | <i>L. major</i> | 152 | 1132 | 1283 |
| LmjF29.1040 | <i>L. major</i> | 98  | 1315 | 1412 |
| LmjF29.1040 | <i>L. major</i> | 131 | 1538 | 1668 |
| LmjF29.1040 | <i>L. major</i> | 43  | 1731 | 1773 |
| LmjF29.1040 | <i>L. major</i> | 82  | 1817 | 1898 |
| LmjF29.1050 | <i>L. major</i> | 54  | 60   | 113  |
| LmjF29.1050 | <i>L. major</i> | 55  | 180  | 234  |
| LmjF29.1050 | <i>L. major</i> | 54  | 301  | 354  |
| LmjF29.1050 | <i>L. major</i> | 55  | 436  | 490  |
| LmjF29.1050 | <i>L. major</i> | 59  | 492  | 550  |
| LmjF29.1050 | <i>L. major</i> | 43  | 764  | 806  |
| LmjF29.1060 | <i>L. major</i> | 47  | 1    | 47   |
| LmjF29.1060 | <i>L. major</i> | 107 | 54   | 160  |
| LmjF29.1060 | <i>L. major</i> | 100 | 193  | 292  |
| LmjF29.1060 | <i>L. major</i> | 157 | 296  | 452  |
| LmjF29.1060 | <i>L. major</i> | 297 | 459  | 755  |
| LmjF29.1060 | <i>L. major</i> | 161 | 796  | 956  |
| LmjF29.1070 | <i>L. major</i> | 87  | 287  | 373  |
| LmjF29.1080 | <i>L. major</i> | 87  | 287  | 373  |
| LmjF29.1090 | <i>L. major</i> | 87  | 287  | 373  |
| LmjF29.1100 | <i>L. major</i> | 51  | 310  | 360  |
| LmjF29.1110 | <i>L. major</i> | 58  | 118  | 175  |
| LmjF29.1110 | <i>L. major</i> | 44  | 582  | 625  |
| LmjF29.1110 | <i>L. major</i> | 44  | 582  | 625  |
| LmjF29.1120 | <i>L. major</i> | 116 | 187  | 302  |
| LmjF29.1120 | <i>L. major</i> | 178 | 332  | 509  |
| LmjF29.1120 | <i>L. major</i> | 80  | 539  | 618  |
| LmjF29.1120 | <i>L. major</i> | 172 | 652  | 823  |
| LmjF29.1130 | <i>L. major</i> | 110 | 78   | 187  |
| LmjF29.1130 | <i>L. major</i> | 53  | 251  | 303  |
| LmjF29.1140 | <i>L. major</i> | 100 | 79   | 178  |
| LmjF29.1170 | <i>L. major</i> | 127 | 152  | 278  |
| LmjF29.1180 | <i>L. major</i> | 149 | 76   | 224  |
| LmjF29.1180 | <i>L. major</i> | 127 | 259  | 385  |
| LmjF29.1180 | <i>L. major</i> | 151 | 434  | 584  |
| LmjF29.1180 | <i>L. major</i> | 283 | 703  | 985  |
| LmjF29.1180 | <i>L. major</i> | 112 | 1044 | 1155 |
| LmjF29.1180 | <i>L. major</i> | 148 | 1160 | 1307 |
| LmjF29.1180 | <i>L. major</i> | 101 | 1325 | 1425 |
| LmjF29.1180 | <i>L. major</i> | 54  | 1473 | 1526 |
| LmjF29.1180 | <i>L. major</i> | 54  | 1551 | 1604 |
| LmjF29.1180 | <i>L. major</i> | 77  | 1772 | 1848 |
| LmjF29.1180 | <i>L. major</i> | 227 | 1974 | 2200 |
| LmjF29.1180 | <i>L. major</i> | 194 | 2240 | 2433 |
| LmjF29.1190 | <i>L. major</i> | 68  | 37   | 104  |
| LmjF29.1190 | <i>L. major</i> | 74  | 251  | 324  |

|             |                 |      |      |      |
|-------------|-----------------|------|------|------|
| LmjF29.1190 | <i>L. major</i> | 41   | 375  | 415  |
| LmjF29.1200 | <i>L. major</i> | 102  | 386  | 487  |
| LmjF29.1210 | <i>L. major</i> | 43   | 50   | 92   |
| LmjF29.1210 | <i>L. major</i> | 47   | 318  | 364  |
| LmjF29.1210 | <i>L. major</i> | 47   | 318  | 364  |
| LmjF29.1220 | <i>L. major</i> | 343  | 135  | 477  |
| LmjF29.1230 | <i>L. major</i> | 1024 | 1    | 1024 |
| LmjF29.1230 | <i>L. major</i> | 78   | 1038 | 1115 |
| LmjF29.1230 | <i>L. major</i> | 66   | 1229 | 1294 |
| LmjF29.1230 | <i>L. major</i> | 75   | 1348 | 1422 |
| LmjF29.1230 | <i>L. major</i> | 41   | 1470 | 1510 |
| LmjF29.1230 | <i>L. major</i> | 41   | 1544 | 1584 |
| LmjF29.1230 | <i>L. major</i> | 349  | 1620 | 1968 |
| LmjF29.1240 | <i>L. major</i> | 68   | 525  | 592  |
| LmjF29.1240 | <i>L. major</i> | 48   | 675  | 722  |
| LmjF29.1240 | <i>L. major</i> | 48   | 675  | 722  |
| LmjF29.1250 | <i>L. major</i> | 94   | 40   | 133  |
| LmjF29.1250 | <i>L. major</i> | 948  | 137  | 1084 |
| LmjF29.1250 | <i>L. major</i> | 711  | 1108 | 1818 |
| LmjF29.1260 | <i>L. major</i> | 77   | 170  | 246  |
| LmjF29.1260 | <i>L. major</i> | 40   | 317  | 356  |
| LmjF29.1260 | <i>L. major</i> | 59   | 609  | 667  |
| LmjF29.1260 | <i>L. major</i> | 250  | 872  | 1121 |
| LmjF29.1260 | <i>L. major</i> | 139  | 1221 | 1359 |
| LmjF29.1270 | <i>L. major</i> | 43   | 61   | 103  |
| LmjF29.1270 | <i>L. major</i> | 95   | 406  | 500  |
| LmjF29.1270 | <i>L. major</i> | 95   | 406  | 500  |
| LmjF29.1280 | <i>L. major</i> | 136  | 1    | 136  |
| LmjF29.1280 | <i>L. major</i> | 111  | 158  | 268  |
| LmjF29.1280 | <i>L. major</i> | 146  | 837  | 982  |
| LmjF29.1280 | <i>L. major</i> | 71   | 1009 | 1079 |
| LmjF29.1280 | <i>L. major</i> | 64   | 1108 | 1171 |
| LmjF29.1280 | <i>L. major</i> | 185  | 1174 | 1358 |
| LmjF29.1280 | <i>L. major</i> | 158  | 1417 | 1574 |
| LmjF29.1280 | <i>L. major</i> | 47   | 1884 | 1930 |
| LmjF29.1290 | <i>L. major</i> | 47   | 52   | 98   |
| LmjF29.1320 | <i>L. major</i> | 53   | 1    | 53   |
| LmjF29.1320 | <i>L. major</i> | 68   | 189  | 256  |
| LmjF29.1320 | <i>L. major</i> | 104  | 304  | 407  |
| LmjF29.1330 | <i>L. major</i> | 139  | 1    | 139  |
| LmjF29.1330 | <i>L. major</i> | 129  | 142  | 270  |
| LmjF29.1330 | <i>L. major</i> | 45   | 415  | 459  |
| LmjF29.1340 | <i>L. major</i> | 65   | 1    | 65   |
| LmjF29.1340 | <i>L. major</i> | 95   | 276  | 370  |
| LmjF29.1340 | <i>L. major</i> | 205  | 393  | 597  |
| LmjF29.1350 | <i>L. major</i> | 79   | 1    | 79   |
| LmjF29.1350 | <i>L. major</i> | 124  | 95   | 218  |

|             |                 |     |      |      |
|-------------|-----------------|-----|------|------|
| LmjF29.1350 | <i>L. major</i> | 518 | 403  | 920  |
| LmjF29.1360 | <i>L. major</i> | 142 | 1    | 142  |
| LmjF29.1360 | <i>L. major</i> | 94  | 322  | 415  |
| LmjF29.1360 | <i>L. major</i> | 136 | 426  | 561  |
| LmjF29.1360 | <i>L. major</i> | 56  | 597  | 652  |
| LmjF29.1370 | <i>L. major</i> | 162 | 1    | 162  |
| LmjF29.1370 | <i>L. major</i> | 45  | 214  | 258  |
| LmjF29.1370 | <i>L. major</i> | 52  | 282  | 333  |
| LmjF29.1370 | <i>L. major</i> | 179 | 444  | 622  |
| LmjF29.1370 | <i>L. major</i> | 315 | 627  | 941  |
| LmjF29.1370 | <i>L. major</i> | 91  | 953  | 1043 |
| LmjF29.1370 | <i>L. major</i> | 72  | 1083 | 1154 |
| LmjF29.1370 | <i>L. major</i> | 55  | 1190 | 1244 |
| LmjF29.1370 | <i>L. major</i> | 66  | 1252 | 1317 |
| LmjF29.1380 | <i>L. major</i> | 311 | 14   | 324  |
| LmjF29.1380 | <i>L. major</i> | 62  | 411  | 472  |
| LmjF29.1380 | <i>L. major</i> | 176 | 483  | 658  |
| LmjF29.1390 | <i>L. major</i> | 66  | 1    | 66   |
| LmjF29.1390 | <i>L. major</i> | 60  | 224  | 283  |
| LmjF29.1390 | <i>L. major</i> | 250 | 344  | 593  |
| LmjF29.1390 | <i>L. major</i> | 90  | 688  | 777  |
| LmjF29.1400 | <i>L. major</i> | 190 | 51   | 240  |
| LmjF29.1410 | <i>L. major</i> | 110 | 1    | 110  |
| LmjF29.1410 | <i>L. major</i> | 341 | 136  | 476  |
| LmjF29.1410 | <i>L. major</i> | 276 | 540  | 815  |
| LmjF29.1420 | <i>L. major</i> | 72  | 290  | 361  |
| LmjF29.1430 | <i>L. major</i> | 80  | 1    | 80   |
| LmjF29.1430 | <i>L. major</i> | 56  | 291  | 346  |
| LmjF29.1430 | <i>L. major</i> | 56  | 291  | 346  |
| LmjF29.1450 | <i>L. major</i> | 133 | 28   | 160  |
| LmjF29.1450 | <i>L. major</i> | 57  | 284  | 340  |
| LmjF29.1450 | <i>L. major</i> | 68  | 588  | 655  |
| LmjF29.1450 | <i>L. major</i> | 75  | 673  | 747  |
| LmjF29.1450 | <i>L. major</i> | 59  | 860  | 918  |
| LmjF29.1460 | <i>L. major</i> | 75  | 172  | 246  |
| LmjF29.1460 | <i>L. major</i> | 112 | 290  | 401  |
| LmjF29.1460 | <i>L. major</i> | 91  | 443  | 533  |
| LmjF29.1460 | <i>L. major</i> | 44  | 996  | 1039 |
| LmjF29.1470 | <i>L. major</i> | 153 | 1    | 153  |
| LmjF29.1470 | <i>L. major</i> | 83  | 255  | 337  |
| LmjF29.1480 | <i>L. major</i> | 75  | 79   | 153  |
| LmjF29.1490 | <i>L. major</i> | 65  | 16   | 80   |
| LmjF29.1490 | <i>L. major</i> | 100 | 369  | 468  |
| LmjF29.1490 | <i>L. major</i> | 110 | 796  | 905  |
| LmjF29.1490 | <i>L. major</i> | 44  | 986  | 1029 |
| LmjF29.1490 | <i>L. major</i> | 49  | 1129 | 1177 |
| LmjF29.1500 | <i>L. major</i> | 126 | 303  | 428  |

|             |                 |     |      |      |
|-------------|-----------------|-----|------|------|
| LmjF29.1510 | <i>L. major</i> | 126 | 303  | 428  |
| LmjF29.1520 | <i>L. major</i> | 72  | 290  | 361  |
| LmjF29.1530 | <i>L. major</i> | 43  | 73   | 115  |
| LmjF29.1530 | <i>L. major</i> | 42  | 172  | 213  |
| LmjF29.1530 | <i>L. major</i> | 49  | 628  | 676  |
| LmjF29.1550 | <i>L. major</i> | 88  | 300  | 387  |
| LmjF29.1560 | <i>L. major</i> | 160 | 36   | 195  |
| LmjF29.1560 | <i>L. major</i> | 51  | 479  | 529  |
| LmjF29.1575 | <i>L. major</i> | 69  | 125  | 193  |
| LmjF29.1575 | <i>L. major</i> | 76  | 290  | 365  |
| LmjF29.1575 | <i>L. major</i> | 58  | 395  | 452  |
| LmjF29.1580 | <i>L. major</i> | 129 | 60   | 188  |
| LmjF29.1580 | <i>L. major</i> | 125 | 232  | 356  |
| LmjF29.1590 | <i>L. major</i> | 46  | 1    | 46   |
| LmjF29.1590 | <i>L. major</i> | 326 | 66   | 391  |
| LmjF29.1590 | <i>L. major</i> | 553 | 425  | 977  |
| LmjF29.1610 | <i>L. major</i> | 73  | 280  | 352  |
| LmjF29.1620 | <i>L. major</i> | 93  | 1    | 93   |
| LmjF29.1620 | <i>L. major</i> | 76  | 188  | 263  |
| LmjF29.1620 | <i>L. major</i> | 46  | 412  | 457  |
| LmjF29.1620 | <i>L. major</i> | 74  | 540  | 613  |
| LmjF29.1620 | <i>L. major</i> | 97  | 713  | 809  |
| LmjF29.1620 | <i>L. major</i> | 61  | 855  | 915  |
| LmjF29.1620 | <i>L. major</i> | 72  | 954  | 1025 |
| LmjF29.1620 | <i>L. major</i> | 47  | 1151 | 1197 |
| LmjF29.1620 | <i>L. major</i> | 102 | 1218 | 1319 |
| LmjF29.1620 | <i>L. major</i> | 48  | 1602 | 1649 |
| LmjF29.1620 | <i>L. major</i> | 48  | 1735 | 1782 |
| LmjF29.1620 | <i>L. major</i> | 55  | 1785 | 1839 |
| LmjF29.1620 | <i>L. major</i> | 61  | 1956 | 2016 |
| LmjF29.1620 | <i>L. major</i> | 56  | 2088 | 2143 |
| LmjF29.1630 | <i>L. major</i> | 71  | 1    | 71   |
| LmjF29.1630 | <i>L. major</i> | 143 | 278  | 420  |
| LmjF29.1630 | <i>L. major</i> | 59  | 1163 | 1221 |
| LmjF29.1640 | <i>L. major</i> | 61  | 1    | 61   |
| LmjF29.1640 | <i>L. major</i> | 110 | 355  | 464  |
| LmjF29.1660 | <i>L. major</i> | 51  | 1    | 51   |
| LmjF29.1660 | <i>L. major</i> | 51  | 134  | 184  |
| LmjF29.1700 | <i>L. major</i> | 41  | 1    | 41   |
| LmjF29.1700 | <i>L. major</i> | 86  | 207  | 292  |
| LmjF29.1700 | <i>L. major</i> | 83  | 580  | 662  |
| LmjF29.1700 | <i>L. major</i> | 369 | 840  | 1208 |
| LmjF29.1710 | <i>L. major</i> | 50  | 1    | 50   |
| LmjF29.1710 | <i>L. major</i> | 66  | 529  | 594  |
| LmjF29.1710 | <i>L. major</i> | 40  | 940  | 979  |
| LmjF29.1710 | <i>L. major</i> | 55  | 1004 | 1058 |
| LmjF29.1750 | <i>L. major</i> | 81  | 136  | 216  |

|             |                 |     |      |      |
|-------------|-----------------|-----|------|------|
| LmjF29.1750 | <i>L. major</i> | 122 | 239  | 360  |
| LmjF29.1750 | <i>L. major</i> | 123 | 473  | 595  |
| LmjF29.1760 | <i>L. major</i> | 81  | 136  | 216  |
| LmjF29.1760 | <i>L. major</i> | 122 | 239  | 360  |
| LmjF29.1760 | <i>L. major</i> | 123 | 473  | 595  |
| LmjF29.1770 | <i>L. major</i> | 81  | 136  | 216  |
| LmjF29.1770 | <i>L. major</i> | 122 | 239  | 360  |
| LmjF29.1770 | <i>L. major</i> | 123 | 473  | 595  |
| LmjF29.1790 | <i>L. major</i> | 167 | 183  | 349  |
| LmjF29.1790 | <i>L. major</i> | 186 | 566  | 751  |
| LmjF29.1790 | <i>L. major</i> | 54  | 798  | 851  |
| LmjF29.1810 | <i>L. major</i> | 48  | 161  | 208  |
| LmjF29.1810 | <i>L. major</i> | 43  | 423  | 465  |
| LmjF29.1810 | <i>L. major</i> | 89  | 499  | 587  |
| LmjF29.1840 | <i>L. major</i> | 52  | 1    | 52   |
| LmjF29.1840 | <i>L. major</i> | 195 | 62   | 256  |
| LmjF29.1840 | <i>L. major</i> | 195 | 62   | 256  |
| LmjF29.1850 | <i>L. major</i> | 165 | 1    | 165  |
| LmjF29.1860 | <i>L. major</i> | 102 | 238  | 339  |
| LmjF29.1870 | <i>L. major</i> | 44  | 65   | 108  |
| LmjF29.1880 | <i>L. major</i> | 43  | 52   | 94   |
| LmjF29.1880 | <i>L. major</i> | 42  | 150  | 191  |
| LmjF29.1880 | <i>L. major</i> | 57  | 268  | 324  |
| LmjF29.1880 | <i>L. major</i> | 92  | 665  | 756  |
| LmjF29.1880 | <i>L. major</i> | 62  | 878  | 939  |
| LmjF29.1890 | <i>L. major</i> | 75  | 95   | 169  |
| LmjF29.1890 | <i>L. major</i> | 152 | 244  | 395  |
| LmjF29.1900 | <i>L. major</i> | 41  | 85   | 125  |
| LmjF29.1900 | <i>L. major</i> | 47  | 219  | 265  |
| LmjF29.1900 | <i>L. major</i> | 87  | 282  | 368  |
| LmjF29.1910 | <i>L. major</i> | 58  | 89   | 146  |
| LmjF29.1910 | <i>L. major</i> | 67  | 289  | 355  |
| LmjF29.1920 | <i>L. major</i> | 67  | 44   | 110  |
| LmjF29.1920 | <i>L. major</i> | 40  | 207  | 246  |
| LmjF29.1930 | <i>L. major</i> | 63  | 1    | 63   |
| LmjF29.1930 | <i>L. major</i> | 106 | 160  | 265  |
| LmjF29.1930 | <i>L. major</i> | 106 | 160  | 265  |
| LmjF29.1940 | <i>L. major</i> | 90  | 1    | 90   |
| LmjF29.1950 | <i>L. major</i> | 42  | 1    | 42   |
| LmjF29.1950 | <i>L. major</i> | 42  | 670  | 711  |
| LmjF29.1950 | <i>L. major</i> | 42  | 670  | 711  |
| LmjF29.1970 | <i>L. major</i> | 41  | 102  | 142  |
| LmjF29.1980 | <i>L. major</i> | 303 | 170  | 472  |
| LmjF29.1980 | <i>L. major</i> | 57  | 476  | 532  |
| LmjF29.1980 | <i>L. major</i> | 88  | 596  | 683  |
| LmjF29.1980 | <i>L. major</i> | 244 | 709  | 952  |
| LmjF29.1980 | <i>L. major</i> | 44  | 1002 | 1045 |

|             |                 |     |      |      |
|-------------|-----------------|-----|------|------|
| LmjF29.1980 | <i>L. major</i> | 89  | 1160 | 1248 |
| LmjF29.1980 | <i>L. major</i> | 51  | 1276 | 1326 |
| LmjF29.1980 | <i>L. major</i> | 40  | 1335 | 1374 |
| LmjF29.1980 | <i>L. major</i> | 86  | 1384 | 1469 |
| LmjF29.1980 | <i>L. major</i> | 71  | 1562 | 1632 |
| LmjF29.1980 | <i>L. major</i> | 94  | 1756 | 1849 |
| LmjF29.1990 | <i>L. major</i> | 43  | 38   | 80   |
| LmjF29.1990 | <i>L. major</i> | 89  | 88   | 176  |
| LmjF29.1990 | <i>L. major</i> | 47  | 327  | 373  |
| LmjF29.1990 | <i>L. major</i> | 49  | 400  | 448  |
| LmjF29.1995 | <i>L. major</i> | 186 | 18   | 203  |
| LmjF29.2000 | <i>L. major</i> | 93  | 42   | 134  |
| LmjF29.2000 | <i>L. major</i> | 48  | 252  | 299  |
| LmjF29.2000 | <i>L. major</i> | 40  | 310  | 349  |
| LmjF29.2000 | <i>L. major</i> | 108 | 410  | 517  |
| LmjF29.2010 | <i>L. major</i> | 103 | 492  | 594  |
| LmjF29.2020 | <i>L. major</i> | 98  | 435  | 532  |
| LmjF29.2020 | <i>L. major</i> | 163 | 603  | 765  |
| LmjF29.2030 | <i>L. major</i> | 52  | 197  | 248  |
| LmjF29.2030 | <i>L. major</i> | 120 | 261  | 380  |
| LmjF29.2040 | <i>L. major</i> | 223 | 1    | 223  |
| LmjF29.2040 | <i>L. major</i> | 94  | 234  | 327  |
| LmjF29.2040 | <i>L. major</i> | 51  | 574  | 624  |
| LmjF29.2040 | <i>L. major</i> | 56  | 672  | 727  |
| LmjF29.2040 | <i>L. major</i> | 53  | 768  | 820  |
| LmjF29.2040 | <i>L. major</i> | 97  | 875  | 971  |
| LmjF29.2040 | <i>L. major</i> | 300 | 981  | 1280 |
| LmjF29.2050 | <i>L. major</i> | 285 | 1    | 285  |
| LmjF29.2050 | <i>L. major</i> | 59  | 335  | 393  |
| LmjF29.2050 | <i>L. major</i> | 42  | 425  | 466  |
| LmjF29.2050 | <i>L. major</i> | 130 | 553  | 682  |
| LmjF29.2060 | <i>L. major</i> | 56  | 968  | 1023 |
| LmjF29.2070 | <i>L. major</i> | 103 | 24   | 126  |
| LmjF29.2070 | <i>L. major</i> | 133 | 272  | 404  |
| LmjF29.2080 | <i>L. major</i> | 42  | 205  | 246  |
| LmjF29.2090 | <i>L. major</i> | 89  | 96   | 184  |
| LmjF29.2090 | <i>L. major</i> | 70  | 353  | 422  |
| LmjF29.2090 | <i>L. major</i> | 73  | 481  | 553  |
| LmjF29.2090 | <i>L. major</i> | 83  | 1074 | 1156 |
| LmjF29.2090 | <i>L. major</i> | 86  | 1517 | 1602 |
| LmjF29.2100 | <i>L. major</i> | 50  | 108  | 157  |
| LmjF29.2100 | <i>L. major</i> | 56  | 201  | 256  |
| LmjF29.2100 | <i>L. major</i> | 56  | 201  | 256  |
| LmjF29.2110 | <i>L. major</i> | 61  | 119  | 179  |
| LmjF29.2110 | <i>L. major</i> | 40  | 326  | 365  |
| LmjF29.2110 | <i>L. major</i> | 40  | 326  | 365  |
| LmjF29.2150 | <i>L. major</i> | 68  | 51   | 118  |

|             |                 |     |      |      |
|-------------|-----------------|-----|------|------|
| LmjF29.2170 | <i>L. major</i> | 85  | 48   | 132  |
| LmjF29.2170 | <i>L. major</i> | 79  | 284  | 362  |
| LmjF29.2170 | <i>L. major</i> | 44  | 475  | 518  |
| LmjF29.2170 | <i>L. major</i> | 69  | 545  | 613  |
| LmjF29.2180 | <i>L. major</i> | 243 | 1    | 243  |
| LmjF29.2190 | <i>L. major</i> | 49  | 124  | 172  |
| LmjF29.2190 | <i>L. major</i> | 41  | 1032 | 1072 |
| LmjF29.2190 | <i>L. major</i> | 40  | 1141 | 1180 |
| LmjF29.2200 | <i>L. major</i> | 90  | 495  | 584  |
| LmjF29.2200 | <i>L. major</i> | 53  | 644  | 696  |
| LmjF29.2210 | <i>L. major</i> | 111 | 165  | 275  |
| LmjF29.2210 | <i>L. major</i> | 162 | 327  | 488  |
| LmjF29.2220 | <i>L. major</i> | 132 | 204  | 335  |
| LmjF29.2230 | <i>L. major</i> | 50  | 45   | 94   |
| LmjF29.2230 | <i>L. major</i> | 87  | 204  | 290  |
| LmjF29.2230 | <i>L. major</i> | 87  | 204  | 290  |
| LmjF29.2250 | <i>L. major</i> | 193 | 1    | 193  |
| LmjF29.2250 | <i>L. major</i> | 62  | 550  | 611  |
| LmjF29.2260 | <i>L. major</i> | 55  | 20   | 74   |
| LmjF29.2260 | <i>L. major</i> | 47  | 175  | 221  |
| LmjF29.2260 | <i>L. major</i> | 47  | 175  | 221  |
| LmjF29.2270 | <i>L. major</i> | 41  | 278  | 318  |
| LmjF29.2290 | <i>L. major</i> | 412 | 1    | 412  |
| LmjF29.2300 | <i>L. major</i> | 51  | 460  | 510  |
| LmjF29.2330 | <i>L. major</i> | 49  | 365  | 413  |
| LmjF29.2340 | <i>L. major</i> | 46  | 1    | 46   |
| LmjF29.2380 | <i>L. major</i> | 47  | 1    | 47   |
| LmjF29.2380 | <i>L. major</i> | 88  | 151  | 238  |
| LmjF29.2380 | <i>L. major</i> | 63  | 246  | 308  |
| LmjF29.2390 | <i>L. major</i> | 46  | 1    | 46   |
| LmjF29.2390 | <i>L. major</i> | 88  | 149  | 236  |
| LmjF29.2390 | <i>L. major</i> | 63  | 244  | 306  |
| LmjF29.2390 | <i>L. major</i> | 61  | 349  | 409  |
| LmjF29.2420 | <i>L. major</i> | 160 | 1    | 160  |
| LmjF29.2420 | <i>L. major</i> | 101 | 163  | 263  |
| LmjF29.2420 | <i>L. major</i> | 249 | 294  | 542  |
| LmjF29.2420 | <i>L. major</i> | 78  | 552  | 629  |
| LmjF29.2430 | <i>L. major</i> | 718 | 1    | 718  |
| LmjF29.2440 | <i>L. major</i> | 87  | 1    | 87   |
| LmjF29.2460 | <i>L. major</i> | 84  | 1    | 84   |
| LmjF29.2460 | <i>L. major</i> | 53  | 129  | 181  |
| LmjF29.2470 | <i>L. major</i> | 84  | 1    | 84   |
| LmjF29.2470 | <i>L. major</i> | 53  | 129  | 181  |
| LmjF29.2480 | <i>L. major</i> | 844 | 1    | 844  |
| LmjF29.2500 | <i>L. major</i> | 56  | 66   | 121  |
| LmjF29.2500 | <i>L. major</i> | 66  | 367  | 432  |
| LmjF29.2500 | <i>L. major</i> | 66  | 367  | 432  |

|             |                 |     |      |      |
|-------------|-----------------|-----|------|------|
| LmjF29.2520 | <i>L. major</i> | 90  | 303  | 392  |
| LmjF29.2550 | <i>L. major</i> | 65  | 771  | 835  |
| LmjF29.2560 | <i>L. major</i> | 58  | 69   | 126  |
| LmjF29.2560 | <i>L. major</i> | 147 | 140  | 286  |
| LmjF29.2560 | <i>L. major</i> | 53  | 361  | 413  |
| LmjF29.2570 | <i>L. major</i> | 164 | 274  | 437  |
| LmjF29.2580 | <i>L. major</i> | 51  | 1    | 51   |
| LmjF29.2580 | <i>L. major</i> | 106 | 71   | 176  |
| LmjF29.2580 | <i>L. major</i> | 75  | 206  | 280  |
| LmjF29.2580 | <i>L. major</i> | 384 | 294  | 677  |
| LmjF29.2590 | <i>L. major</i> | 55  | 1    | 55   |
| LmjF29.2590 | <i>L. major</i> | 166 | 141  | 306  |
| LmjF29.2590 | <i>L. major</i> | 102 | 321  | 422  |
| LmjF29.2590 | <i>L. major</i> | 75  | 516  | 590  |
| LmjF29.2610 | <i>L. major</i> | 232 | 1    | 232  |
| LmjF29.2610 | <i>L. major</i> | 46  | 245  | 290  |
| LmjF29.2610 | <i>L. major</i> | 50  | 366  | 415  |
| LmjF29.2610 | <i>L. major</i> | 70  | 649  | 718  |
| LmjF29.2630 | <i>L. major</i> | 63  | 112  | 174  |
| LmjF29.2630 | <i>L. major</i> | 78  | 289  | 366  |
| LmjF29.2630 | <i>L. major</i> | 83  | 503  | 585  |
| LmjF29.2630 | <i>L. major</i> | 131 | 775  | 905  |
| LmjF29.2630 | <i>L. major</i> | 233 | 1000 | 1232 |
| LmjF29.2650 | <i>L. major</i> | 58  | 464  | 521  |
| LmjF29.2650 | <i>L. major</i> | 73  | 819  | 891  |
| LmjF29.2650 | <i>L. major</i> | 41  | 945  | 985  |
| LmjF29.2660 | <i>L. major</i> | 60  | 128  | 187  |
| LmjF29.2660 | <i>L. major</i> | 118 | 744  | 861  |
| LmjF29.2660 | <i>L. major</i> | 118 | 744  | 861  |
| LmjF29.2670 | <i>L. major</i> | 75  | 249  | 323  |
| LmjF29.2670 | <i>L. major</i> | 79  | 348  | 426  |
| LmjF29.2680 | <i>L. major</i> | 89  | 53   | 141  |
| LmjF29.2680 | <i>L. major</i> | 316 | 146  | 461  |
| LmjF29.2680 | <i>L. major</i> | 181 | 859  | 1039 |
| LmjF29.2690 | <i>L. major</i> | 259 | 50   | 308  |
| LmjF29.2700 | <i>L. major</i> | 43  | 747  | 789  |
| LmjF29.2720 | <i>L. major</i> | 43  | 1    | 43   |
| LmjF29.2720 | <i>L. major</i> | 44  | 233  | 276  |
| LmjF29.2720 | <i>L. major</i> | 44  | 233  | 276  |
| LmjF29.2730 | <i>L. major</i> | 61  | 244  | 304  |
| LmjF29.2740 | <i>L. major</i> | 45  | 178  | 222  |
| LmjF29.2760 | <i>L. major</i> | 41  | 1    | 41   |
| LmjF29.2810 | <i>L. major</i> | 63  | 1    | 63   |
| LmjF29.2810 | <i>L. major</i> | 178 | 561  | 738  |
| LmjF29.2810 | <i>L. major</i> | 178 | 561  | 738  |
| LmjF29.2830 | <i>L. major</i> | 109 | 1    | 109  |
| LmjF29.2880 | <i>L. major</i> | 40  | 740  | 779  |



|             |                 |     |      |      |
|-------------|-----------------|-----|------|------|
| LmjF30.0030 | <i>L. major</i> | 58  | 157  | 214  |
| LmjF30.0050 | <i>L. major</i> | 144 | 94   | 237  |
| LmjF30.0050 | <i>L. major</i> | 217 | 546  | 762  |
| LmjF30.0060 | <i>L. major</i> | 43  | 142  | 184  |
| LmjF30.0080 | <i>L. major</i> | 56  | 1    | 56   |
| LmjF30.0090 | <i>L. major</i> | 228 | 1    | 228  |
| LmjF30.0120 | <i>L. major</i> | 47  | 575  | 621  |
| LmjF30.0140 | <i>L. major</i> | 108 | 1    | 108  |
| LmjF30.0200 | <i>L. major</i> | 63  | 136  | 198  |
| LmjF30.0200 | <i>L. major</i> | 45  | 239  | 283  |
| LmjF30.0200 | <i>L. major</i> | 42  | 293  | 334  |
| LmjF30.0200 | <i>L. major</i> | 46  | 384  | 429  |
| LmjF30.0210 | <i>L. major</i> | 65  | 1    | 65   |
| LmjF30.0220 | <i>L. major</i> | 156 | 213  | 368  |
| LmjF30.0240 | <i>L. major</i> | 51  | 352  | 402  |
| LmjF30.0240 | <i>L. major</i> | 45  | 407  | 451  |
| LmjF30.0240 | <i>L. major</i> | 40  | 504  | 543  |
| LmjF30.0250 | <i>L. major</i> | 59  | 406  | 464  |
| LmjF30.0250 | <i>L. major</i> | 77  | 1055 | 1131 |
| LmjF30.0260 | <i>L. major</i> | 56  | 152  | 207  |
| LmjF30.0260 | <i>L. major</i> | 116 | 311  | 426  |
| LmjF30.0260 | <i>L. major</i> | 59  | 579  | 637  |
| LmjF30.0270 | <i>L. major</i> | 91  | 304  | 394  |
| LmjF30.0280 | <i>L. major</i> | 87  | 1    | 87   |
| LmjF30.0290 | <i>L. major</i> | 61  | 384  | 444  |
| LmjF30.0290 | <i>L. major</i> | 145 | 476  | 620  |
| LmjF30.0290 | <i>L. major</i> | 90  | 820  | 909  |
| LmjF30.0290 | <i>L. major</i> | 74  | 1102 | 1175 |
| LmjF30.0300 | <i>L. major</i> | 61  | 20   | 80   |
| LmjF30.0310 | <i>L. major</i> | 47  | 1    | 47   |
| LmjF30.0310 | <i>L. major</i> | 67  | 94   | 160  |
| LmjF30.0310 | <i>L. major</i> | 305 | 222  | 526  |
| LmjF30.0310 | <i>L. major</i> | 508 | 732  | 1239 |
| LmjF30.0320 | <i>L. major</i> | 125 | 224  | 348  |
| LmjF30.0320 | <i>L. major</i> | 61  | 394  | 454  |
| LmjF30.0320 | <i>L. major</i> | 61  | 460  | 520  |
| LmjF30.0330 | <i>L. major</i> | 247 | 525  | 771  |
| LmjF30.0340 | <i>L. major</i> | 91  | 551  | 641  |
| LmjF30.0350 | <i>L. major</i> | 50  | 377  | 426  |
| LmjF30.0350 | <i>L. major</i> | 122 | 486  | 607  |
| LmjF30.0350 | <i>L. major</i> | 122 | 486  | 607  |
| LmjF30.0370 | <i>L. major</i> | 48  | 259  | 306  |
| LmjF30.0390 | <i>L. major</i> | 54  | 31   | 84   |
| LmjF30.0390 | <i>L. major</i> | 125 | 126  | 250  |
| LmjF30.0400 | <i>L. major</i> | 106 | 319  | 424  |
| LmjF30.0410 | <i>L. major</i> | 63  | 1    | 63   |
| LmjF30.0420 | <i>L. major</i> | 54  | 313  | 366  |

|             |                 |     |      |      |
|-------------|-----------------|-----|------|------|
| LmjF30.0440 | <i>L. major</i> | 42  | 1    | 42   |
| LmjF30.0450 | <i>L. major</i> | 96  | 1    | 96   |
| LmjF30.0460 | <i>L. major</i> | 47  | 1    | 47   |
| LmjF30.0460 | <i>L. major</i> | 46  | 146  | 191  |
| LmjF30.0460 | <i>L. major</i> | 46  | 146  | 191  |
| LmjF30.0470 | <i>L. major</i> | 71  | 284  | 354  |
| LmjF30.0470 | <i>L. major</i> | 60  | 490  | 549  |
| LmjF30.0480 | <i>L. major</i> | 51  | 1    | 51   |
| LmjF30.0480 | <i>L. major</i> | 153 | 58   | 210  |
| LmjF30.0490 | <i>L. major</i> | 345 | 1    | 345  |
| LmjF30.0490 | <i>L. major</i> | 109 | 360  | 468  |
| LmjF30.0490 | <i>L. major</i> | 217 | 500  | 716  |
| LmjF30.0495 | <i>L. major</i> | 62  | 32   | 93   |
| LmjF30.0500 | <i>L. major</i> | 454 | 6    | 459  |
| LmjF30.0510 | <i>L. major</i> | 46  | 13   | 58   |
| LmjF30.0510 | <i>L. major</i> | 103 | 118  | 220  |
| LmjF30.0510 | <i>L. major</i> | 88  | 473  | 560  |
| LmjF30.0510 | <i>L. major</i> | 192 | 598  | 789  |
| LmjF30.0510 | <i>L. major</i> | 70  | 826  | 895  |
| LmjF30.0510 | <i>L. major</i> | 132 | 945  | 1076 |
| LmjF30.0510 | <i>L. major</i> | 59  | 1090 | 1148 |
| LmjF30.0520 | <i>L. major</i> | 45  | 283  | 327  |
| LmjF30.0520 | <i>L. major</i> | 53  | 691  | 743  |
| LmjF30.0520 | <i>L. major</i> | 53  | 691  | 743  |
| LmjF30.0550 | <i>L. major</i> | 78  | 532  | 609  |
| LmjF30.0560 | <i>L. major</i> | 272 | 54   | 325  |
| LmjF30.0570 | <i>L. major</i> | 134 | 1    | 134  |
| LmjF30.0570 | <i>L. major</i> | 127 | 346  | 472  |
| LmjF30.0590 | <i>L. major</i> | 53  | 226  | 278  |
| LmjF30.0600 | <i>L. major</i> | 156 | 51   | 206  |
| LmjF30.0600 | <i>L. major</i> | 143 | 212  | 354  |
| LmjF30.0600 | <i>L. major</i> | 310 | 619  | 928  |
| LmjF30.0610 | <i>L. major</i> | 91  | 1    | 91   |
| LmjF30.0620 | <i>L. major</i> | 68  | 73   | 140  |
| LmjF30.0620 | <i>L. major</i> | 103 | 143  | 245  |
| LmjF30.0630 | <i>L. major</i> | 66  | 1    | 66   |
| LmjF30.0640 | <i>L. major</i> | 63  | 103  | 165  |
| LmjF30.0650 | <i>L. major</i> | 59  | 1    | 59   |
| LmjF30.0660 | <i>L. major</i> | 72  | 1    | 72   |
| LmjF30.0710 | <i>L. major</i> | 55  | 492  | 546  |
| LmjF30.0730 | <i>L. major</i> | 93  | 1    | 93   |
| LmjF30.0735 | <i>L. major</i> | 53  | 87   | 139  |
| LmjF30.0745 | <i>L. major</i> | 116 | 44   | 159  |
| LmjF30.0760 | <i>L. major</i> | 201 | 802  | 1002 |
| LmjF30.0760 | <i>L. major</i> | 50  | 1008 | 1057 |
| LmjF30.0780 | <i>L. major</i> | 155 | 29   | 183  |
| LmjF30.0780 | <i>L. major</i> | 45  | 265  | 309  |

|             |                 |     |     |     |
|-------------|-----------------|-----|-----|-----|
| LmjF30.0790 | <i>L. major</i> | 179 | 168 | 346 |
| LmjF30.0800 | <i>L. major</i> | 104 | 407 | 510 |
| LmjF30.0805 | <i>L. major</i> | 62  | 88  | 149 |
| LmjF30.0820 | <i>L. major</i> | 129 | 75  | 203 |
| LmjF30.0820 | <i>L. major</i> | 55  | 273 | 327 |
| LmjF30.0820 | <i>L. major</i> | 83  | 441 | 523 |
| LmjF30.0820 | <i>L. major</i> | 178 | 589 | 766 |
| LmjF30.0830 | <i>L. major</i> | 49  | 1   | 49  |
| LmjF30.0830 | <i>L. major</i> | 60  | 87  | 146 |
| LmjF30.0830 | <i>L. major</i> | 60  | 87  | 146 |
| LmjF30.0840 | <i>L. major</i> | 139 | 1   | 139 |
| LmjF30.0840 | <i>L. major</i> | 73  | 846 | 918 |
| LmjF30.0840 | <i>L. major</i> | 73  | 846 | 918 |
| LmjF30.0890 | <i>L. major</i> | 75  | 8   | 82  |
| LmjF30.0900 | <i>L. major</i> | 221 | 1   | 221 |
| LmjF30.0900 | <i>L. major</i> | 284 | 348 | 631 |
| LmjF30.0910 | <i>L. major</i> | 107 | 1   | 107 |
| LmjF30.0910 | <i>L. major</i> | 58  | 627 | 684 |
| LmjF30.0910 | <i>L. major</i> | 52  | 747 | 798 |
| LmjF30.0910 | <i>L. major</i> | 42  | 936 | 977 |
| LmjF30.0920 | <i>L. major</i> | 61  | 29  | 89  |
| LmjF30.0920 | <i>L. major</i> | 57  | 211 | 267 |
| LmjF30.0920 | <i>L. major</i> | 58  | 343 | 400 |
| LmjF30.0920 | <i>L. major</i> | 55  | 473 | 527 |
| LmjF30.0920 | <i>L. major</i> | 53  | 549 | 601 |
| LmjF30.0930 | <i>L. major</i> | 40  | 438 | 477 |
| LmjF30.0940 | <i>L. major</i> | 67  | 1   | 67  |
| LmjF30.0940 | <i>L. major</i> | 52  | 370 | 421 |
| LmjF30.0940 | <i>L. major</i> | 52  | 732 | 783 |
| LmjF30.0950 | <i>L. major</i> | 211 | 1   | 211 |
| LmjF30.0960 | <i>L. major</i> | 249 | 1   | 249 |
| LmjF30.0960 | <i>L. major</i> | 82  | 309 | 390 |
| LmjF30.0970 | <i>L. major</i> | 55  | 1   | 55  |
| LmjF30.0980 | <i>L. major</i> | 41  | 167 | 207 |
| LmjF30.0980 | <i>L. major</i> | 91  | 312 | 402 |
| LmjF30.0980 | <i>L. major</i> | 91  | 312 | 402 |
| LmjF30.0990 | <i>L. major</i> | 58  | 64  | 121 |
| LmjF30.0990 | <i>L. major</i> | 80  | 177 | 256 |
| LmjF30.0990 | <i>L. major</i> | 45  | 286 | 330 |
| LmjF30.0990 | <i>L. major</i> | 65  | 380 | 444 |
| LmjF30.1000 | <i>L. major</i> | 53  | 129 | 181 |
| LmjF30.1000 | <i>L. major</i> | 66  | 242 | 307 |
| LmjF30.1000 | <i>L. major</i> | 60  | 444 | 503 |
| LmjF30.1000 | <i>L. major</i> | 82  | 531 | 612 |
| LmjF30.1010 | <i>L. major</i> | 80  | 711 | 790 |
| LmjF30.1020 | <i>L. major</i> | 72  | 1   | 72  |
| LmjF30.1020 | <i>L. major</i> | 142 | 237 | 378 |

|             |                 |     |      |      |
|-------------|-----------------|-----|------|------|
| LmjF30.1030 | <i>L. major</i> | 216 | 103  | 318  |
| LmjF30.1070 | <i>L. major</i> | 142 | 1    | 142  |
| LmjF30.1080 | <i>L. major</i> | 131 | 1    | 131  |
| LmjF30.1080 | <i>L. major</i> | 49  | 268  | 316  |
| LmjF30.1080 | <i>L. major</i> | 917 | 420  | 1336 |
| LmjF30.1080 | <i>L. major</i> | 272 | 1411 | 1682 |
| LmjF30.1080 | <i>L. major</i> | 167 | 1690 | 1856 |
| LmjF30.1080 | <i>L. major</i> | 82  | 1887 | 1968 |
| LmjF30.1080 | <i>L. major</i> | 317 | 2007 | 2323 |
| LmjF30.1080 | <i>L. major</i> | 43  | 2337 | 2379 |
| LmjF30.1090 | <i>L. major</i> | 79  | 157  | 235  |
| LmjF30.1090 | <i>L. major</i> | 58  | 279  | 336  |
| LmjF30.1090 | <i>L. major</i> | 103 | 504  | 606  |
| LmjF30.1090 | <i>L. major</i> | 57  | 641  | 697  |
| LmjF30.1090 | <i>L. major</i> | 122 | 742  | 863  |
| LmjF30.1090 | <i>L. major</i> | 57  | 892  | 948  |
| LmjF30.1110 | <i>L. major</i> | 76  | 81   | 156  |
| LmjF30.1110 | <i>L. major</i> | 86  | 356  | 441  |
| LmjF30.1110 | <i>L. major</i> | 44  | 576  | 619  |
| LmjF30.1120 | <i>L. major</i> | 41  | 1    | 41   |
| LmjF30.1150 | <i>L. major</i> | 183 | 1    | 183  |
| LmjF30.1150 | <i>L. major</i> | 85  | 316  | 400  |
| LmjF30.1150 | <i>L. major</i> | 84  | 484  | 567  |
| LmjF30.1150 | <i>L. major</i> | 66  | 773  | 838  |
| LmjF30.1160 | <i>L. major</i> | 286 | 1    | 286  |
| LmjF30.1160 | <i>L. major</i> | 67  | 443  | 509  |
| LmjF30.1160 | <i>L. major</i> | 71  | 526  | 596  |
| LmjF30.1160 | <i>L. major</i> | 48  | 680  | 727  |
| LmjF30.1160 | <i>L. major</i> | 44  | 742  | 785  |
| LmjF30.1160 | <i>L. major</i> | 57  | 904  | 960  |
| LmjF30.1160 | <i>L. major</i> | 160 | 1116 | 1275 |
| LmjF30.1160 | <i>L. major</i> | 66  | 1475 | 1540 |
| LmjF30.1160 | <i>L. major</i> | 108 | 1561 | 1668 |
| LmjF30.1170 | <i>L. major</i> | 184 | 1    | 184  |
| LmjF30.1170 | <i>L. major</i> | 42  | 641  | 682  |
| LmjF30.1190 | <i>L. major</i> | 46  | 131  | 176  |
| LmjF30.1200 | <i>L. major</i> | 95  | 45   | 139  |
| LmjF30.1200 | <i>L. major</i> | 94  | 249  | 342  |
| LmjF30.1200 | <i>L. major</i> | 64  | 408  | 471  |
| LmjF30.1200 | <i>L. major</i> | 43  | 592  | 634  |
| LmjF30.1200 | <i>L. major</i> | 102 | 822  | 923  |
| LmjF30.1220 | <i>L. major</i> | 114 | 20   | 133  |
| LmjF30.1220 | <i>L. major</i> | 111 | 172  | 282  |
| LmjF30.1220 | <i>L. major</i> | 91  | 529  | 619  |
| LmjF30.1220 | <i>L. major</i> | 184 | 742  | 925  |
| LmjF30.1230 | <i>L. major</i> | 65  | 394  | 458  |
| LmjF30.1230 | <i>L. major</i> | 201 | 523  | 723  |

|             |                 |     |      |      |
|-------------|-----------------|-----|------|------|
| LmjF30.1240 | <i>L. major</i> | 43  | 1    | 43   |
| LmjF30.1240 | <i>L. major</i> | 40  | 95   | 134  |
| LmjF30.1240 | <i>L. major</i> | 40  | 95   | 134  |
| LmjF30.1255 | <i>L. major</i> | 43  | 270  | 312  |
| LmjF30.1260 | <i>L. major</i> | 162 | 263  | 424  |
| LmjF30.1260 | <i>L. major</i> | 93  | 533  | 625  |
| LmjF30.1260 | <i>L. major</i> | 57  | 1346 | 1402 |
| LmjF30.1260 | <i>L. major</i> | 46  | 1421 | 1466 |
| LmjF30.1260 | <i>L. major</i> | 116 | 1522 | 1637 |
| LmjF30.1260 | <i>L. major</i> | 44  | 1836 | 1879 |
| LmjF30.1270 | <i>L. major</i> | 42  | 100  | 141  |
| LmjF30.1270 | <i>L. major</i> | 78  | 190  | 267  |
| LmjF30.1270 | <i>L. major</i> | 208 | 285  | 492  |
| LmjF30.1270 | <i>L. major</i> | 119 | 502  | 620  |
| LmjF30.1270 | <i>L. major</i> | 65  | 641  | 705  |
| LmjF30.1280 | <i>L. major</i> | 122 | 1    | 122  |
| LmjF30.1280 | <i>L. major</i> | 70  | 374  | 443  |
| LmjF30.1280 | <i>L. major</i> | 95  | 758  | 852  |
| LmjF30.1280 | <i>L. major</i> | 42  | 925  | 966  |
| LmjF30.1280 | <i>L. major</i> | 59  | 1165 | 1223 |
| LmjF30.1290 | <i>L. major</i> | 81  | 1    | 81   |
| LmjF30.1300 | <i>L. major</i> | 41  | 83   | 123  |
| LmjF30.1300 | <i>L. major</i> | 40  | 191  | 230  |
| LmjF30.1300 | <i>L. major</i> | 57  | 542  | 598  |
| LmjF30.1300 | <i>L. major</i> | 205 | 920  | 1124 |
| LmjF30.1300 | <i>L. major</i> | 59  | 1157 | 1215 |
| LmjF30.1310 | <i>L. major</i> | 241 | 1    | 241  |
| LmjF30.1310 | <i>L. major</i> | 251 | 341  | 591  |
| LmjF30.1310 | <i>L. major</i> | 193 | 673  | 865  |
| LmjF30.1310 | <i>L. major</i> | 79  | 894  | 972  |
| LmjF30.1310 | <i>L. major</i> | 67  | 1108 | 1174 |
| LmjF30.1310 | <i>L. major</i> | 231 | 1212 | 1442 |
| LmjF30.1310 | <i>L. major</i> | 56  | 1444 | 1499 |
| LmjF30.1310 | <i>L. major</i> | 101 | 1615 | 1715 |
| LmjF30.1330 | <i>L. major</i> | 45  | 151  | 195  |
| LmjF30.1340 | <i>L. major</i> | 56  | 58   | 113  |
| LmjF30.1340 | <i>L. major</i> | 168 | 151  | 318  |
| LmjF30.1350 | <i>L. major</i> | 71  | 1    | 71   |
| LmjF30.1350 | <i>L. major</i> | 187 | 167  | 353  |
| LmjF30.1360 | <i>L. major</i> | 180 | 307  | 486  |
| LmjF30.1370 | <i>L. major</i> | 189 | 1    | 189  |
| LmjF30.1370 | <i>L. major</i> | 299 | 214  | 512  |
| LmjF30.1370 | <i>L. major</i> | 162 | 517  | 678  |
| LmjF30.1400 | <i>L. major</i> | 227 | 1    | 227  |
| LmjF30.1410 | <i>L. major</i> | 44  | 1    | 44   |
| LmjF30.1420 | <i>L. major</i> | 47  | 1    | 47   |
| LmjF30.1430 | <i>L. major</i> | 62  | 1    | 62   |

|             |                 |     |      |      |
|-------------|-----------------|-----|------|------|
| LmjF30.1440 | <i>L. major</i> | 70  | 21   | 90   |
| LmjF30.1440 | <i>L. major</i> | 41  | 136  | 176  |
| LmjF30.1440 | <i>L. major</i> | 72  | 370  | 441  |
| LmjF30.1440 | <i>L. major</i> | 42  | 670  | 711  |
| LmjF30.1440 | <i>L. major</i> | 47  | 818  | 864  |
| LmjF30.1440 | <i>L. major</i> | 127 | 1033 | 1159 |
| LmjF30.1440 | <i>L. major</i> | 97  | 1201 | 1297 |
| LmjF30.1440 | <i>L. major</i> | 84  | 1334 | 1417 |
| LmjF30.1450 | <i>L. major</i> | 159 | 408  | 566  |
| LmjF30.1450 | <i>L. major</i> | 282 | 670  | 951  |
| LmjF30.1520 | <i>L. major</i> | 69  | 105  | 173  |
| LmjF30.1530 | <i>L. major</i> | 43  | 129  | 171  |
| LmjF30.1530 | <i>L. major</i> | 56  | 309  | 364  |
| LmjF30.1530 | <i>L. major</i> | 146 | 470  | 615  |
| LmjF30.1530 | <i>L. major</i> | 84  | 767  | 850  |
| LmjF30.1530 | <i>L. major</i> | 156 | 896  | 1051 |
| LmjF30.1540 | <i>L. major</i> | 64  | 185  | 248  |
| LmjF30.1550 | <i>L. major</i> | 49  | 1    | 49   |
| LmjF30.1550 | <i>L. major</i> | 84  | 415  | 498  |
| LmjF30.1550 | <i>L. major</i> | 84  | 415  | 498  |
| LmjF30.1560 | <i>L. major</i> | 49  | 53   | 101  |
| LmjF30.1560 | <i>L. major</i> | 127 | 175  | 301  |
| LmjF30.1560 | <i>L. major</i> | 73  | 351  | 423  |
| LmjF30.1560 | <i>L. major</i> | 78  | 457  | 534  |
| LmjF30.1560 | <i>L. major</i> | 236 | 641  | 876  |
| LmjF30.1560 | <i>L. major</i> | 104 | 951  | 1054 |
| LmjF30.1560 | <i>L. major</i> | 56  | 1078 | 1133 |
| LmjF30.1570 | <i>L. major</i> | 42  | 64   | 105  |
| LmjF30.1570 | <i>L. major</i> | 57  | 214  | 270  |
| LmjF30.1570 | <i>L. major</i> | 57  | 214  | 270  |
| LmjF30.1580 | <i>L. major</i> | 100 | 107  | 206  |
| LmjF30.1580 | <i>L. major</i> | 74  | 646  | 719  |
| LmjF30.1590 | <i>L. major</i> | 47  | 25   | 71   |
| LmjF30.1590 | <i>L. major</i> | 67  | 89   | 155  |
| LmjF30.1590 | <i>L. major</i> | 67  | 89   | 155  |
| LmjF30.1600 | <i>L. major</i> | 52  | 267  | 318  |
| LmjF30.1600 | <i>L. major</i> | 115 | 374  | 488  |
| LmjF30.1610 | <i>L. major</i> | 44  | 196  | 239  |
| LmjF30.1610 | <i>L. major</i> | 164 | 861  | 1024 |
| LmjF30.1620 | <i>L. major</i> | 133 | 18   | 150  |
| LmjF30.1620 | <i>L. major</i> | 91  | 601  | 691  |
| LmjF30.1690 | <i>L. major</i> | 82  | 115  | 196  |
| LmjF30.1690 | <i>L. major</i> | 63  | 213  | 275  |
| LmjF30.1690 | <i>L. major</i> | 65  | 290  | 354  |
| LmjF30.1700 | <i>L. major</i> | 112 | 32   | 143  |
| LmjF30.1700 | <i>L. major</i> | 93  | 201  | 293  |
| LmjF30.1700 | <i>L. major</i> | 160 | 598  | 757  |

|             |                 |     |      |      |
|-------------|-----------------|-----|------|------|
| LmjF30.1710 | <i>L. major</i> | 42  | 194  | 235  |
| LmjF30.1720 | <i>L. major</i> | 59  | 23   | 81   |
| LmjF30.1730 | <i>L. major</i> | 367 | 24   | 390  |
| LmjF30.1740 | <i>L. major</i> | 43  | 1    | 43   |
| LmjF30.1760 | <i>L. major</i> | 47  | 197  | 243  |
| LmjF30.1760 | <i>L. major</i> | 168 | 479  | 646  |
| LmjF30.1760 | <i>L. major</i> | 148 | 861  | 1008 |
| LmjF30.1760 | <i>L. major</i> | 208 | 1204 | 1411 |
| LmjF30.1760 | <i>L. major</i> | 199 | 1656 | 1854 |
| LmjF30.1770 | <i>L. major</i> | 154 | 1    | 154  |
| LmjF30.1780 | <i>L. major</i> | 53  | 42   | 94   |
| LmjF30.1780 | <i>L. major</i> | 47  | 98   | 144  |
| LmjF30.1780 | <i>L. major</i> | 70  | 256  | 325  |
| LmjF30.1790 | <i>L. major</i> | 94  | 188  | 281  |
| LmjF30.1790 | <i>L. major</i> | 96  | 361  | 456  |
| LmjF30.1800 | <i>L. major</i> | 56  | 143  | 198  |
| LmjF30.1810 | <i>L. major</i> | 133 | 1    | 133  |
| LmjF30.1810 | <i>L. major</i> | 80  | 415  | 494  |
| LmjF30.1810 | <i>L. major</i> | 51  | 1190 | 1240 |
| LmjF30.1810 | <i>L. major</i> | 50  | 1310 | 1359 |
| LmjF30.1810 | <i>L. major</i> | 65  | 1570 | 1634 |
| LmjF30.1810 | <i>L. major</i> | 92  | 2046 | 2137 |
| LmjF30.1810 | <i>L. major</i> | 127 | 2334 | 2460 |
| LmjF30.1810 | <i>L. major</i> | 128 | 2502 | 2629 |
| LmjF30.1810 | <i>L. major</i> | 56  | 2660 | 2715 |
| LmjF30.1810 | <i>L. major</i> | 81  | 2824 | 2904 |
| LmjF30.1810 | <i>L. major</i> | 80  | 3466 | 3545 |
| LmjF30.1810 | <i>L. major</i> | 88  | 3604 | 3691 |
| LmjF30.1810 | <i>L. major</i> | 67  | 4088 | 4154 |
| LmjF30.1810 | <i>L. major</i> | 50  | 4731 | 4780 |
| LmjF30.1810 | <i>L. major</i> | 45  | 4871 | 4915 |
| LmjF30.1810 | <i>L. major</i> | 71  | 5092 | 5162 |
| LmjF30.1810 | <i>L. major</i> | 42  | 5240 | 5281 |
| LmjF30.1830 | <i>L. major</i> | 52  | 265  | 316  |
| LmjF30.1830 | <i>L. major</i> | 102 | 407  | 508  |
| LmjF30.1830 | <i>L. major</i> | 48  | 575  | 622  |
| LmjF30.1840 | <i>L. major</i> | 107 | 1    | 107  |
| LmjF30.1840 | <i>L. major</i> | 193 | 137  | 329  |
| LmjF30.1840 | <i>L. major</i> | 200 | 363  | 562  |
| LmjF30.1840 | <i>L. major</i> | 136 | 564  | 699  |
| LmjF30.1850 | <i>L. major</i> | 87  | 104  | 190  |
| LmjF30.1850 | <i>L. major</i> | 72  | 200  | 271  |
| LmjF30.1850 | <i>L. major</i> | 83  | 358  | 440  |
| LmjF30.1850 | <i>L. major</i> | 69  | 978  | 1046 |
| LmjF30.1850 | <i>L. major</i> | 56  | 1201 | 1256 |
| LmjF30.1850 | <i>L. major</i> | 69  | 1306 | 1374 |
| LmjF30.1860 | <i>L. major</i> | 124 | 101  | 224  |

|             |                 |     |      |      |
|-------------|-----------------|-----|------|------|
| LmjF30.1860 | <i>L. major</i> | 120 | 255  | 374  |
| LmjF30.1860 | <i>L. major</i> | 41  | 376  | 416  |
| LmjF30.1870 | <i>L. major</i> | 189 | 98   | 286  |
| LmjF30.1870 | <i>L. major</i> | 179 | 291  | 469  |
| LmjF30.1870 | <i>L. major</i> | 134 | 500  | 633  |
| LmjF30.1870 | <i>L. major</i> | 459 | 648  | 1106 |
| LmjF30.1870 | <i>L. major</i> | 87  | 1118 | 1204 |
| LmjF30.1870 | <i>L. major</i> | 58  | 1215 | 1272 |
| LmjF30.1890 | <i>L. major</i> | 53  | 118  | 170  |
| LmjF30.1900 | <i>L. major</i> | 91  | 164  | 254  |
| LmjF30.1900 | <i>L. major</i> | 126 | 312  | 437  |
| LmjF30.1900 | <i>L. major</i> | 106 | 532  | 637  |
| LmjF30.1900 | <i>L. major</i> | 69  | 725  | 793  |
| LmjF30.1900 | <i>L. major</i> | 43  | 944  | 986  |
| LmjF30.1920 | <i>L. major</i> | 61  | 88   | 148  |
| LmjF30.1920 | <i>L. major</i> | 59  | 237  | 295  |
| LmjF30.1920 | <i>L. major</i> | 98  | 508  | 605  |
| LmjF30.1950 | <i>L. major</i> | 78  | 1    | 78   |
| LmjF30.1950 | <i>L. major</i> | 161 | 290  | 450  |
| LmjF30.1950 | <i>L. major</i> | 225 | 625  | 849  |
| LmjF30.1950 | <i>L. major</i> | 49  | 856  | 904  |
| LmjF30.1950 | <i>L. major</i> | 248 | 912  | 1159 |
| LmjF30.1960 | <i>L. major</i> | 94  | 125  | 218  |
| LmjF30.1960 | <i>L. major</i> | 51  | 220  | 270  |
| LmjF30.1970 | <i>L. major</i> | 79  | 105  | 183  |
| LmjF30.1970 | <i>L. major</i> | 74  | 302  | 375  |
| LmjF30.1970 | <i>L. major</i> | 74  | 302  | 375  |
| LmjF30.1975 | <i>L. major</i> | 89  | 110  | 198  |
| LmjF30.1980 | <i>L. major</i> | 57  | 127  | 183  |
| LmjF30.1980 | <i>L. major</i> | 40  | 302  | 341  |
| LmjF30.1980 | <i>L. major</i> | 40  | 302  | 341  |
| LmjF30.1985 | <i>L. major</i> | 148 | 18   | 165  |
| LmjF30.1990 | <i>L. major</i> | 54  | 54   | 107  |
| LmjF30.1990 | <i>L. major</i> | 130 | 223  | 352  |
| LmjF30.1990 | <i>L. major</i> | 43  | 545  | 587  |
| LmjF30.1990 | <i>L. major</i> | 45  | 628  | 672  |
| LmjF30.1990 | <i>L. major</i> | 77  | 755  | 831  |
| LmjF30.1990 | <i>L. major</i> | 60  | 910  | 969  |
| LmjF30.2000 | <i>L. major</i> | 55  | 75   | 129  |
| LmjF30.2010 | <i>L. major</i> | 132 | 52   | 183  |
| LmjF30.2010 | <i>L. major</i> | 276 | 198  | 473  |
| LmjF30.2010 | <i>L. major</i> | 76  | 505  | 580  |
| LmjF30.2010 | <i>L. major</i> | 103 | 603  | 705  |
| LmjF30.2010 | <i>L. major</i> | 50  | 720  | 769  |
| LmjF30.2010 | <i>L. major</i> | 132 | 800  | 931  |
| LmjF30.2010 | <i>L. major</i> | 375 | 1124 | 1498 |
| LmjF30.2020 | <i>L. major</i> | 155 | 1    | 155  |



|             |                 |     |      |      |
|-------------|-----------------|-----|------|------|
| LmjF30.2020 | <i>L. major</i> | 58  | 189  | 246  |
| LmjF30.2020 | <i>L. major</i> | 153 | 280  | 432  |
| LmjF30.2040 | <i>L. major</i> | 47  | 320  | 366  |
| LmjF30.2040 | <i>L. major</i> | 68  | 709  | 776  |
| LmjF30.2040 | <i>L. major</i> | 55  | 886  | 940  |
| LmjF30.2040 | <i>L. major</i> | 48  | 1021 | 1068 |
| LmjF30.2060 | <i>L. major</i> | 119 | 271  | 389  |
| LmjF30.2060 | <i>L. major</i> | 149 | 694  | 842  |
| LmjF30.2065 | <i>L. major</i> | 237 | 1    | 237  |
| LmjF30.2070 | <i>L. major</i> | 89  | 120  | 208  |
| LmjF30.2080 | <i>L. major</i> | 57  | 1    | 57   |
| LmjF30.2080 | <i>L. major</i> | 105 | 447  | 551  |
| LmjF30.2100 | <i>L. major</i> | 84  | 55   | 138  |
| LmjF30.2100 | <i>L. major</i> | 64  | 347  | 410  |
| LmjF30.2100 | <i>L. major</i> | 46  | 486  | 531  |
| LmjF30.2110 | <i>L. major</i> | 54  | 152  | 205  |
| LmjF30.2110 | <i>L. major</i> | 144 | 245  | 388  |
| LmjF30.2110 | <i>L. major</i> | 85  | 420  | 504  |
| LmjF30.2130 | <i>L. major</i> | 76  | 83   | 158  |
| LmjF30.2130 | <i>L. major</i> | 134 | 403  | 536  |
| LmjF30.2130 | <i>L. major</i> | 73  | 667  | 739  |
| LmjF30.2140 | <i>L. major</i> | 71  | 158  | 228  |
| LmjF30.2140 | <i>L. major</i> | 172 | 257  | 428  |
| LmjF30.2140 | <i>L. major</i> | 172 | 257  | 428  |
| LmjF30.2150 | <i>L. major</i> | 59  | 408  | 466  |
| LmjF30.2160 | <i>L. major</i> | 53  | 129  | 181  |
| LmjF30.2160 | <i>L. major</i> | 41  | 228  | 268  |
| LmjF30.2160 | <i>L. major</i> | 178 | 404  | 581  |
| LmjF30.2170 | <i>L. major</i> | 60  | 1    | 60   |
| LmjF30.2180 | <i>L. major</i> | 275 | 171  | 445  |
| LmjF30.2190 | <i>L. major</i> | 184 | 172  | 355  |
| LmjF30.2200 | <i>L. major</i> | 85  | 62   | 146  |
| LmjF30.2210 | <i>L. major</i> | 72  | 757  | 828  |
| LmjF30.2210 | <i>L. major</i> | 54  | 1372 | 1425 |
| LmjF30.2210 | <i>L. major</i> | 58  | 1842 | 1899 |
| LmjF30.2210 | <i>L. major</i> | 49  | 2410 | 2458 |
| LmjF30.2220 | <i>L. major</i> | 74  | 44   | 117  |
| LmjF30.2220 | <i>L. major</i> | 57  | 181  | 237  |
| LmjF30.2230 | <i>L. major</i> | 76  | 72   | 147  |
| LmjF30.2250 | <i>L. major</i> | 71  | 86   | 156  |
| LmjF30.2250 | <i>L. major</i> | 121 | 251  | 371  |
| LmjF30.2250 | <i>L. major</i> | 121 | 251  | 371  |
| LmjF30.2260 | <i>L. major</i> | 41  | 534  | 574  |
| LmjF30.2260 | <i>L. major</i> | 110 | 763  | 872  |
| LmjF30.2260 | <i>L. major</i> | 110 | 763  | 872  |
| LmjF30.2270 | <i>L. major</i> | 124 | 53   | 176  |
| LmjF30.2270 | <i>L. major</i> | 153 | 214  | 366  |

|             |                 |     |      |      |
|-------------|-----------------|-----|------|------|
| LmjF30.2270 | <i>L. major</i> | 190 | 373  | 562  |
| LmjF30.2270 | <i>L. major</i> | 128 | 632  | 759  |
| LmjF30.2270 | <i>L. major</i> | 44  | 892  | 935  |
| LmjF30.2270 | <i>L. major</i> | 109 | 949  | 1057 |
| LmjF30.2270 | <i>L. major</i> | 42  | 1244 | 1285 |
| LmjF30.2270 | <i>L. major</i> | 121 | 1576 | 1696 |
| LmjF30.2280 | <i>L. major</i> | 82  | 1    | 82   |
| LmjF30.2280 | <i>L. major</i> | 69  | 338  | 406  |
| LmjF30.2280 | <i>L. major</i> | 69  | 338  | 406  |
| LmjF30.2290 | <i>L. major</i> | 84  | 27   | 110  |
| LmjF30.2290 | <i>L. major</i> | 86  | 445  | 530  |
| LmjF30.2290 | <i>L. major</i> | 81  | 687  | 767  |
| LmjF30.2300 | <i>L. major</i> | 46  | 110  | 155  |
| LmjF30.2300 | <i>L. major</i> | 62  | 177  | 238  |
| LmjF30.2300 | <i>L. major</i> | 86  | 510  | 595  |
| LmjF30.2300 | <i>L. major</i> | 157 | 850  | 1006 |
| LmjF30.2300 | <i>L. major</i> | 105 | 1036 | 1140 |
| LmjF30.2300 | <i>L. major</i> | 55  | 1251 | 1305 |
| LmjF30.2340 | <i>L. major</i> | 76  | 85   | 160  |
| LmjF30.2340 | <i>L. major</i> | 42  | 192  | 233  |
| LmjF30.2340 | <i>L. major</i> | 317 | 267  | 583  |
| LmjF30.2340 | <i>L. major</i> | 547 | 651  | 1197 |
| LmjF30.2360 | <i>L. major</i> | 40  | 337  | 376  |
| LmjF30.2380 | <i>L. major</i> | 178 | 1    | 178  |
| LmjF30.2380 | <i>L. major</i> | 57  | 185  | 241  |
| LmjF30.2380 | <i>L. major</i> | 57  | 185  | 241  |
| LmjF30.2390 | <i>L. major</i> | 128 | 872  | 999  |
| LmjF30.2390 | <i>L. major</i> | 85  | 1247 | 1331 |
| LmjF30.2390 | <i>L. major</i> | 40  | 1382 | 1421 |
| LmjF30.2390 | <i>L. major</i> | 73  | 1456 | 1528 |
| LmjF30.2390 | <i>L. major</i> | 45  | 1565 | 1609 |
| LmjF30.2390 | <i>L. major</i> | 61  | 1721 | 1781 |
| LmjF30.2390 | <i>L. major</i> | 61  | 2499 | 2559 |
| LmjF30.2390 | <i>L. major</i> | 54  | 2681 | 2734 |
| LmjF30.2390 | <i>L. major</i> | 62  | 2748 | 2809 |
| LmjF30.2390 | <i>L. major</i> | 56  | 2951 | 3006 |
| LmjF30.2390 | <i>L. major</i> | 40  | 3317 | 3356 |
| LmjF30.2400 | <i>L. major</i> | 40  | 234  | 273  |
| LmjF30.2430 | <i>L. major</i> | 495 | 272  | 766  |
| LmjF30.2430 | <i>L. major</i> | 434 | 785  | 1218 |
| LmjF30.2440 | <i>L. major</i> | 57  | 399  | 455  |
| LmjF30.2440 | <i>L. major</i> | 55  | 513  | 567  |
| LmjF30.2440 | <i>L. major</i> | 69  | 671  | 739  |
| LmjF30.2450 | <i>L. major</i> | 161 | 67   | 227  |
| LmjF30.2460 | <i>L. major</i> | 111 | 525  | 635  |
| LmjF30.2470 | <i>L. major</i> | 149 | 514  | 662  |
| LmjF30.2480 | <i>L. major</i> | 149 | 514  | 662  |

|             |                 |     |     |      |
|-------------|-----------------|-----|-----|------|
| LmjF30.2490 | <i>L. major</i> | 147 | 514 | 660  |
| LmjF30.2540 | <i>L. major</i> | 46  | 1   | 46   |
| LmjF30.2540 | <i>L. major</i> | 61  | 214 | 274  |
| LmjF30.2540 | <i>L. major</i> | 46  | 481 | 526  |
| LmjF30.2550 | <i>L. major</i> | 139 | 514 | 652  |
| LmjF30.2560 | <i>L. major</i> | 52  | 18  | 69   |
| LmjF30.2560 | <i>L. major</i> | 135 | 89  | 223  |
| LmjF30.2560 | <i>L. major</i> | 79  | 323 | 401  |
| LmjF30.2560 | <i>L. major</i> | 48  | 574 | 621  |
| LmjF30.2560 | <i>L. major</i> | 82  | 634 | 715  |
| LmjF30.2560 | <i>L. major</i> | 41  | 775 | 815  |
| LmjF30.2560 | <i>L. major</i> | 56  | 964 | 1019 |
| LmjF30.2570 | <i>L. major</i> | 91  | 101 | 191  |
| LmjF30.2570 | <i>L. major</i> | 51  | 332 | 382  |
| LmjF30.2570 | <i>L. major</i> | 51  | 332 | 382  |
| LmjF30.2610 | <i>L. major</i> | 76  | 1   | 76   |
| LmjF30.2610 | <i>L. major</i> | 60  | 157 | 216  |
| LmjF30.2620 | <i>L. major</i> | 209 | 1   | 209  |
| LmjF30.2620 | <i>L. major</i> | 100 | 226 | 325  |
| LmjF30.2620 | <i>L. major</i> | 117 | 582 | 698  |
| LmjF30.2640 | <i>L. major</i> | 83  | 171 | 253  |
| LmjF30.2640 | <i>L. major</i> | 327 | 505 | 831  |
| LmjF30.2660 | <i>L. major</i> | 43  | 9   | 51   |
| LmjF30.2660 | <i>L. major</i> | 64  | 127 | 190  |
| LmjF30.2660 | <i>L. major</i> | 64  | 127 | 190  |
| LmjF30.2690 | <i>L. major</i> | 110 | 56  | 165  |
| LmjF30.2690 | <i>L. major</i> | 88  | 207 | 294  |
| LmjF30.2700 | <i>L. major</i> | 46  | 271 | 316  |
| LmjF30.2710 | <i>L. major</i> | 265 | 14  | 278  |
| LmjF30.2710 | <i>L. major</i> | 135 | 280 | 414  |
| LmjF30.2710 | <i>L. major</i> | 163 | 425 | 587  |
| LmjF30.2710 | <i>L. major</i> | 82  | 596 | 677  |
| LmjF30.2710 | <i>L. major</i> | 201 | 732 | 932  |
| LmjF30.2720 | <i>L. major</i> | 62  | 17  | 78   |
| LmjF30.2720 | <i>L. major</i> | 172 | 144 | 315  |
| LmjF30.2720 | <i>L. major</i> | 47  | 516 | 562  |
| LmjF30.2730 | <i>L. major</i> | 50  | 129 | 178  |
| LmjF30.2730 | <i>L. major</i> | 171 | 217 | 387  |
| LmjF30.2740 | <i>L. major</i> | 76  | 68  | 143  |
| LmjF30.2740 | <i>L. major</i> | 116 | 228 | 343  |
| LmjF30.2740 | <i>L. major</i> | 116 | 228 | 343  |
| LmjF30.2750 | <i>L. major</i> | 58  | 177 | 234  |
| LmjF30.2780 | <i>L. major</i> | 98  | 101 | 198  |
| LmjF30.2780 | <i>L. major</i> | 66  | 225 | 290  |
| LmjF30.2790 | <i>L. major</i> | 75  | 1   | 75   |
| LmjF30.2800 | <i>L. major</i> | 84  | 31  | 114  |
| LmjF30.2820 | <i>L. major</i> | 40  | 338 | 377  |

|             |                 |     |      |      |
|-------------|-----------------|-----|------|------|
| LmjF30.2830 | <i>L. major</i> | 764 | 1    | 764  |
| LmjF30.2860 | <i>L. major</i> | 63  | 70   | 132  |
| LmjF30.2870 | <i>L. major</i> | 40  | 224  | 263  |
| LmjF30.2870 | <i>L. major</i> | 100 | 384  | 483  |
| LmjF30.2880 | <i>L. major</i> | 87  | 35   | 121  |
| LmjF30.2880 | <i>L. major</i> | 42  | 132  | 173  |
| LmjF30.2890 | <i>L. major</i> | 47  | 411  | 457  |
| LmjF30.2920 | <i>L. major</i> | 56  | 15   | 70   |
| LmjF30.2920 | <i>L. major</i> | 378 | 79   | 456  |
| LmjF30.2950 | <i>L. major</i> | 67  | 1    | 67   |
| LmjF30.2960 | <i>L. major</i> | 91  | 135  | 225  |
| LmjF30.3000 | <i>L. major</i> | 87  | 1    | 87   |
| LmjF30.3010 | <i>L. major</i> | 239 | 160  | 398  |
| LmjF30.3020 | <i>L. major</i> | 121 | 201  | 321  |
| LmjF30.3030 | <i>L. major</i> | 77  | 179  | 255  |
| LmjF30.3040 | <i>L. major</i> | 93  | 47   | 139  |
| LmjF30.3040 | <i>L. major</i> | 59  | 274  | 332  |
| LmjF30.3040 | <i>L. major</i> | 42  | 490  | 531  |
| LmjF30.3050 | <i>L. major</i> | 44  | 1513 | 1556 |
| LmjF30.3050 | <i>L. major</i> | 94  | 1806 | 1899 |
| LmjF30.3050 | <i>L. major</i> | 94  | 1806 | 1899 |
| LmjF30.3060 | <i>L. major</i> | 78  | 1    | 78   |
| LmjF30.3060 | <i>L. major</i> | 136 | 430  | 565  |
| LmjF30.3060 | <i>L. major</i> | 201 | 624  | 824  |
| LmjF30.3060 | <i>L. major</i> | 52  | 848  | 899  |
| LmjF30.3060 | <i>L. major</i> | 104 | 933  | 1036 |
| LmjF30.3060 | <i>L. major</i> | 127 | 1065 | 1191 |
| LmjF30.3070 | <i>L. major</i> | 119 | 1    | 119  |
| LmjF30.3070 | <i>L. major</i> | 57  | 331  | 387  |
| LmjF30.3090 | <i>L. major</i> | 139 | 128  | 266  |
| LmjF30.3100 | <i>L. major</i> | 48  | 279  | 326  |
| LmjF30.3100 | <i>L. major</i> | 40  | 587  | 626  |
| LmjF30.3100 | <i>L. major</i> | 40  | 587  | 626  |
| LmjF30.3130 | <i>L. major</i> | 61  | 907  | 967  |
| LmjF30.3140 | <i>L. major</i> | 109 | 1    | 109  |
| LmjF30.3170 | <i>L. major</i> | 381 | 1    | 381  |
| LmjF30.3180 | <i>L. major</i> | 48  | 100  | 147  |
| LmjF30.3210 | <i>L. major</i> | 49  | 64   | 112  |
| LmjF30.3210 | <i>L. major</i> | 109 | 217  | 325  |
| LmjF30.3210 | <i>L. major</i> | 212 | 358  | 569  |
| LmjF30.3210 | <i>L. major</i> | 155 | 639  | 793  |
| LmjF30.3240 | <i>L. major</i> | 42  | 142  | 183  |
| LmjF30.3240 | <i>L. major</i> | 48  | 547  | 594  |
| LmjF30.3240 | <i>L. major</i> | 48  | 547  | 594  |
| LmjF30.3250 | <i>L. major</i> | 179 | 1    | 179  |
| LmjF30.3250 | <i>L. major</i> | 125 | 447  | 571  |
| LmjF30.3250 | <i>L. major</i> | 45  | 870  | 914  |

|             |                 |     |     |      |
|-------------|-----------------|-----|-----|------|
| LmjF30.3260 | <i>L. major</i> | 122 | 290 | 411  |
| LmjF30.3290 | <i>L. major</i> | 43  | 126 | 168  |
| LmjF30.3290 | <i>L. major</i> | 43  | 238 | 280  |
| LmjF30.3290 | <i>L. major</i> | 43  | 345 | 387  |
| LmjF30.3290 | <i>L. major</i> | 101 | 467 | 567  |
| LmjF30.3290 | <i>L. major</i> | 41  | 742 | 782  |
| LmjF30.3290 | <i>L. major</i> | 161 | 880 | 1040 |
| LmjF30.3300 | <i>L. major</i> | 107 | 57  | 163  |
| LmjF30.3300 | <i>L. major</i> | 58  | 208 | 265  |
| LmjF30.3300 | <i>L. major</i> | 54  | 306 | 359  |
| LmjF30.3320 | <i>L. major</i> | 47  | 1   | 47   |
| LmjF30.3320 | <i>L. major</i> | 130 | 229 | 358  |
| LmjF30.3330 | <i>L. major</i> | 275 | 64  | 338  |
| LmjF30.3360 | <i>L. major</i> | 108 | 515 | 622  |
| LmjF30.3370 | <i>L. major</i> | 532 | 39  | 570  |
| LmjF30.3390 | <i>L. major</i> | 52  | 883 | 934  |
| LmjF30.3410 | <i>L. major</i> | 43  | 73  | 115  |
| LmjF30.3410 | <i>L. major</i> | 100 | 231 | 330  |
| LmjF30.3410 | <i>L. major</i> | 100 | 231 | 330  |
| LmjF30.3420 | <i>L. major</i> | 64  | 1   | 64   |
| LmjF30.3420 | <i>L. major</i> | 48  | 228 | 275  |
| LmjF30.3420 | <i>L. major</i> | 132 | 332 | 463  |
| LmjF30.3430 | <i>L. major</i> | 54  | 743 | 796  |
| LmjF30.3440 | <i>L. major</i> | 51  | 1   | 51   |
| LmjF30.3440 | <i>L. major</i> | 45  | 132 | 176  |
| LmjF30.3440 | <i>L. major</i> | 45  | 132 | 176  |
| LmjF30.3445 | <i>L. major</i> | 116 | 1   | 116  |
| LmjF30.3450 | <i>L. major</i> | 42  | 32  | 73   |
| LmjF30.3470 | <i>L. major</i> | 50  | 308 | 357  |
| LmjF30.3480 | <i>L. major</i> | 89  | 77  | 165  |
| LmjF30.3490 | <i>L. major</i> | 50  | 1   | 50   |
| LmjF30.3510 | <i>L. major</i> | 50  | 1   | 50   |
| LmjF30.3540 | <i>L. major</i> | 89  | 48  | 136  |
| LmjF30.3540 | <i>L. major</i> | 51  | 171 | 221  |
| LmjF30.3540 | <i>L. major</i> | 51  | 171 | 221  |
| LmjF30.3570 | <i>L. major</i> | 46  | 1   | 46   |
| LmjF30.3570 | <i>L. major</i> | 52  | 88  | 139  |
| LmjF30.3570 | <i>L. major</i> | 112 | 155 | 266  |
| LmjF30.3580 | <i>L. major</i> | 144 | 1   | 144  |
| LmjF30.3580 | <i>L. major</i> | 86  | 299 | 384  |
| LmjF30.3580 | <i>L. major</i> | 71  | 553 | 623  |
| LmjF30.3580 | <i>L. major</i> | 102 | 646 | 747  |
| LmjF30.3590 | <i>L. major</i> | 72  | 92  | 163  |
| LmjF30.3610 | <i>L. major</i> | 43  | 171 | 213  |
| LmjF30.3620 | <i>L. major</i> | 145 | 49  | 193  |
| LmjF30.3620 | <i>L. major</i> | 159 | 212 | 370  |
| LmjF30.3620 | <i>L. major</i> | 159 | 212 | 370  |

|             |                 |     |      |      |
|-------------|-----------------|-----|------|------|
| LmjF30.3650 | <i>L. major</i> | 51  | 39   | 89   |
| LmjF30.3650 | <i>L. major</i> | 47  | 158  | 204  |
| LmjF30.3650 | <i>L. major</i> | 47  | 158  | 204  |
| LmjF30.3680 | <i>L. major</i> | 45  | 1    | 45   |
| LmjF30.3680 | <i>L. major</i> | 43  | 87   | 129  |
| LmjF30.3680 | <i>L. major</i> | 49  | 235  | 283  |
| LmjF30.3690 | <i>L. major</i> | 73  | 69   | 141  |
| LmjF30.3690 | <i>L. major</i> | 50  | 532  | 581  |
| LmjF30.3690 | <i>L. major</i> | 50  | 532  | 581  |
| LmjF30.3700 | <i>L. major</i> | 44  | 17   | 60   |
| LmjF30.3710 | <i>L. major</i> | 48  | 269  | 316  |
| LmjF30.3720 | <i>L. major</i> | 65  | 42   | 106  |
| LmjF30.3730 | <i>L. major</i> | 65  | 61   | 125  |
| LmjF30.3740 | <i>L. major</i> | 72  | 45   | 116  |
| LmjF30.3740 | <i>L. major</i> | 91  | 132  | 222  |
| LmjF31.0020 | <i>L. major</i> | 49  | 1    | 49   |
| LmjF31.0030 | <i>L. major</i> | 46  | 66   | 111  |
| LmjF31.0030 | <i>L. major</i> | 91  | 1159 | 1249 |
| LmjF31.0040 | <i>L. major</i> | 88  | 10   | 97   |
| LmjF31.0040 | <i>L. major</i> | 47  | 566  | 612  |
| LmjF31.0040 | <i>L. major</i> | 47  | 566  | 612  |
| LmjF31.0070 | <i>L. major</i> | 93  | 119  | 211  |
| LmjF31.0070 | <i>L. major</i> | 46  | 875  | 920  |
| LmjF31.0080 | <i>L. major</i> | 127 | 1    | 127  |
| LmjF31.0080 | <i>L. major</i> | 80  | 152  | 231  |
| LmjF31.0090 | <i>L. major</i> | 49  | 304  | 352  |
| LmjF31.0110 | <i>L. major</i> | 96  | 179  | 274  |
| LmjF31.0120 | <i>L. major</i> | 47  | 1    | 47   |
| LmjF31.0130 | <i>L. major</i> | 729 | 1    | 729  |
| LmjF31.0140 | <i>L. major</i> | 48  | 327  | 374  |
| LmjF31.0160 | <i>L. major</i> | 45  | 884  | 928  |
| LmjF31.0170 | <i>L. major</i> | 65  | 444  | 508  |
| LmjF31.0190 | <i>L. major</i> | 223 | 1    | 223  |
| LmjF31.0190 | <i>L. major</i> | 96  | 534  | 629  |
| LmjF31.0200 | <i>L. major</i> | 45  | 202  | 246  |
| LmjF31.0210 | <i>L. major</i> | 40  | 246  | 285  |
| LmjF31.0220 | <i>L. major</i> | 115 | 1    | 115  |
| LmjF31.0230 | <i>L. major</i> | 204 | 15   | 218  |
| LmjF31.0230 | <i>L. major</i> | 178 | 257  | 434  |
| LmjF31.0230 | <i>L. major</i> | 311 | 450  | 760  |
| LmjF31.0240 | <i>L. major</i> | 41  | 1    | 41   |
| LmjF31.0240 | <i>L. major</i> | 72  | 91   | 162  |
| LmjF31.0250 | <i>L. major</i> | 51  | 1    | 51   |
| LmjF31.0260 | <i>L. major</i> | 99  | 15   | 113  |
| LmjF31.0260 | <i>L. major</i> | 57  | 238  | 294  |
| LmjF31.0260 | <i>L. major</i> | 57  | 238  | 294  |
| LmjF31.0290 | <i>L. major</i> | 222 | 1    | 222  |

|             |                 |     |      |      |
|-------------|-----------------|-----|------|------|
| LmjF31.0290 | <i>L. major</i> | 181 | 525  | 705  |
| LmjF31.0290 | <i>L. major</i> | 48  | 793  | 840  |
| LmjF31.0310 | <i>L. major</i> | 90  | 1    | 90   |
| LmjF31.0310 | <i>L. major</i> | 104 | 365  | 468  |
| LmjF31.0310 | <i>L. major</i> | 104 | 365  | 468  |
| LmjF31.0320 | <i>L. major</i> | 99  | 1    | 99   |
| LmjF31.0330 | <i>L. major</i> | 58  | 16   | 73   |
| LmjF31.0340 | <i>L. major</i> | 40  | 1    | 40   |
| LmjF31.0350 | <i>L. major</i> | 90  | 1    | 90   |
| LmjF31.0360 | <i>L. major</i> | 125 | 286  | 410  |
| LmjF31.0360 | <i>L. major</i> | 78  | 914  | 991  |
| LmjF31.0360 | <i>L. major</i> | 78  | 914  | 991  |
| LmjF31.0370 | <i>L. major</i> | 71  | 67   | 137  |
| LmjF31.0370 | <i>L. major</i> | 71  | 142  | 212  |
| LmjF31.0370 | <i>L. major</i> | 50  | 379  | 428  |
| LmjF31.0380 | <i>L. major</i> | 89  | 1    | 89   |
| LmjF31.0380 | <i>L. major</i> | 51  | 291  | 341  |
| LmjF31.0380 | <i>L. major</i> | 94  | 570  | 663  |
| LmjF31.0380 | <i>L. major</i> | 56  | 733  | 788  |
| LmjF31.0380 | <i>L. major</i> | 70  | 807  | 876  |
| LmjF31.0380 | <i>L. major</i> | 114 | 878  | 991  |
| LmjF31.0380 | <i>L. major</i> | 44  | 1088 | 1131 |
| LmjF31.0380 | <i>L. major</i> | 49  | 1332 | 1380 |
| LmjF31.0390 | <i>L. major</i> | 153 | 30   | 182  |
| LmjF31.0400 | <i>L. major</i> | 95  | 88   | 182  |
| LmjF31.0430 | <i>L. major</i> | 68  | 151  | 218  |
| LmjF31.0430 | <i>L. major</i> | 46  | 773  | 818  |
| LmjF31.0430 | <i>L. major</i> | 46  | 773  | 818  |
| LmjF31.0440 | <i>L. major</i> | 42  | 1    | 42   |
| LmjF31.0480 | <i>L. major</i> | 91  | 233  | 323  |
| LmjF31.0490 | <i>L. major</i> | 92  | 1    | 92   |
| LmjF31.0490 | <i>L. major</i> | 85  | 416  | 500  |
| LmjF31.0500 | <i>L. major</i> | 101 | 1    | 101  |
| LmjF31.0500 | <i>L. major</i> | 75  | 144  | 218  |
| LmjF31.0500 | <i>L. major</i> | 64  | 222  | 285  |
| LmjF31.0500 | <i>L. major</i> | 146 | 356  | 501  |
| LmjF31.0500 | <i>L. major</i> | 59  | 548  | 606  |
| LmjF31.0510 | <i>L. major</i> | 63  | 33   | 95   |
| LmjF31.0510 | <i>L. major</i> | 58  | 225  | 282  |
| LmjF31.0510 | <i>L. major</i> | 62  | 536  | 597  |
| LmjF31.0520 | <i>L. major</i> | 110 | 1    | 110  |
| LmjF31.0520 | <i>L. major</i> | 46  | 251  | 296  |
| LmjF31.0520 | <i>L. major</i> | 48  | 361  | 408  |
| LmjF31.0530 | <i>L. major</i> | 542 | 1    | 542  |
| LmjF31.0530 | <i>L. major</i> | 135 | 544  | 678  |
| LmjF31.0540 | <i>L. major</i> | 71  | 42   | 112  |
| LmjF31.0540 | <i>L. major</i> | 94  | 746  | 839  |

|             |                 |     |      |      |
|-------------|-----------------|-----|------|------|
| LmjF31.0550 | <i>L. major</i> | 144 | 1    | 144  |
| LmjF31.0550 | <i>L. major</i> | 73  | 205  | 277  |
| LmjF31.0550 | <i>L. major</i> | 170 | 316  | 485  |
| LmjF31.0550 | <i>L. major</i> | 225 | 522  | 746  |
| LmjF31.0550 | <i>L. major</i> | 64  | 911  | 974  |
| LmjF31.0550 | <i>L. major</i> | 58  | 1067 | 1124 |
| LmjF31.0570 | <i>L. major</i> | 42  | 1    | 42   |
| LmjF31.0580 | <i>L. major</i> | 60  | 1    | 60   |
| LmjF31.0580 | <i>L. major</i> | 43  | 77   | 119  |
| LmjF31.0600 | <i>L. major</i> | 98  | 35   | 132  |
| LmjF31.0600 | <i>L. major</i> | 103 | 203  | 305  |
| LmjF31.0600 | <i>L. major</i> | 82  | 377  | 458  |
| LmjF31.0610 | <i>L. major</i> | 91  | 1    | 91   |
| LmjF31.0610 | <i>L. major</i> | 56  | 114  | 169  |
| LmjF31.0610 | <i>L. major</i> | 82  | 179  | 260  |
| LmjF31.0610 | <i>L. major</i> | 55  | 415  | 469  |
| LmjF31.0620 | <i>L. major</i> | 85  | 88   | 172  |
| LmjF31.0620 | <i>L. major</i> | 173 | 250  | 422  |
| LmjF31.0620 | <i>L. major</i> | 54  | 638  | 691  |
| LmjF31.0630 | <i>L. major</i> | 113 | 113  | 225  |
| LmjF31.0630 | <i>L. major</i> | 67  | 311  | 377  |
| LmjF31.0630 | <i>L. major</i> | 59  | 518  | 576  |
| LmjF31.0640 | <i>L. major</i> | 44  | 177  | 220  |
| LmjF31.0640 | <i>L. major</i> | 44  | 481  | 524  |
| LmjF31.0640 | <i>L. major</i> | 44  | 481  | 524  |
| LmjF31.0660 | <i>L. major</i> | 183 | 1    | 183  |
| LmjF31.0660 | <i>L. major</i> | 44  | 190  | 233  |
| LmjF31.0660 | <i>L. major</i> | 111 | 257  | 367  |
| LmjF31.0660 | <i>L. major</i> | 101 | 386  | 486  |
| LmjF31.0660 | <i>L. major</i> | 241 | 512  | 752  |
| LmjF31.0660 | <i>L. major</i> | 47  | 817  | 863  |
| LmjF31.0660 | <i>L. major</i> | 187 | 885  | 1071 |
| LmjF31.0660 | <i>L. major</i> | 111 | 1166 | 1276 |
| LmjF31.0660 | <i>L. major</i> | 112 | 1644 | 1755 |
| LmjF31.0660 | <i>L. major</i> | 68  | 1782 | 1849 |
| LmjF31.0670 | <i>L. major</i> | 301 | 1    | 301  |
| LmjF31.0670 | <i>L. major</i> | 363 | 327  | 689  |
| LmjF31.0670 | <i>L. major</i> | 168 | 697  | 864  |
| LmjF31.0670 | <i>L. major</i> | 95  | 929  | 1023 |
| LmjF31.0680 | <i>L. major</i> | 129 | 139  | 267  |
| LmjF31.0690 | <i>L. major</i> | 115 | 156  | 270  |
| LmjF31.0690 | <i>L. major</i> | 102 | 429  | 530  |
| LmjF31.0690 | <i>L. major</i> | 102 | 429  | 530  |
| LmjF31.0700 | <i>L. major</i> | 49  | 86   | 134  |
| LmjF31.0700 | <i>L. major</i> | 55  | 207  | 261  |
| LmjF31.0700 | <i>L. major</i> | 109 | 520  | 628  |
| LmjF31.0710 | <i>L. major</i> | 74  | 56   | 129  |



|             |                 |     |     |     |
|-------------|-----------------|-----|-----|-----|
| LmjF31.0720 | <i>L. major</i> | 57  | 1   | 57  |
| LmjF31.0720 | <i>L. major</i> | 51  | 83  | 133 |
| LmjF31.0720 | <i>L. major</i> | 245 | 442 | 686 |
| LmjF31.0740 | <i>L. major</i> | 114 | 75  | 188 |
| LmjF31.0750 | <i>L. major</i> | 72  | 108 | 179 |
| LmjF31.0750 | <i>L. major</i> | 83  | 215 | 297 |
| LmjF31.0750 | <i>L. major</i> | 83  | 215 | 297 |
| LmjF31.0760 | <i>L. major</i> | 72  | 117 | 188 |
| LmjF31.0760 | <i>L. major</i> | 40  | 261 | 300 |
| LmjF31.0760 | <i>L. major</i> | 40  | 261 | 300 |
| LmjF31.0770 | <i>L. major</i> | 64  | 98  | 161 |
| LmjF31.0780 | <i>L. major</i> | 123 | 152 | 274 |
| LmjF31.0790 | <i>L. major</i> | 162 | 127 | 288 |
| LmjF31.0800 | <i>L. major</i> | 81  | 94  | 174 |
| LmjF31.0800 | <i>L. major</i> | 42  | 178 | 219 |
| LmjF31.0800 | <i>L. major</i> | 42  | 178 | 219 |
| LmjF31.0810 | <i>L. major</i> | 76  | 1   | 76  |
| LmjF31.0810 | <i>L. major</i> | 128 | 150 | 277 |
| LmjF31.0820 | <i>L. major</i> | 47  | 1   | 47  |
| LmjF31.0820 | <i>L. major</i> | 42  | 51  | 92  |
| LmjF31.0820 | <i>L. major</i> | 42  | 51  | 92  |
| LmjF31.0850 | <i>L. major</i> | 64  | 98  | 161 |
| LmjF31.0850 | <i>L. major</i> | 193 | 244 | 436 |
| LmjF31.0860 | <i>L. major</i> | 51  | 192 | 242 |
| LmjF31.0860 | <i>L. major</i> | 323 | 288 | 610 |
| LmjF31.0870 | <i>L. major</i> | 63  | 1   | 63  |
| LmjF31.0880 | <i>L. major</i> | 63  | 1   | 63  |
| LmjF31.0890 | <i>L. major</i> | 115 | 44  | 158 |
| LmjF31.0910 | <i>L. major</i> | 51  | 52  | 102 |
| LmjF31.0920 | <i>L. major</i> | 76  | 64  | 139 |
| LmjF31.0920 | <i>L. major</i> | 68  | 485 | 552 |
| LmjF31.0930 | <i>L. major</i> | 76  | 64  | 139 |
| LmjF31.0930 | <i>L. major</i> | 65  | 487 | 551 |
| LmjF31.0940 | <i>L. major</i> | 61  | 13  | 73  |
| LmjF31.0940 | <i>L. major</i> | 54  | 169 | 222 |
| LmjF31.0940 | <i>L. major</i> | 70  | 234 | 303 |
| LmjF31.0950 | <i>L. major</i> | 76  | 64  | 139 |
| LmjF31.0950 | <i>L. major</i> | 65  | 489 | 553 |
| LmjF31.0960 | <i>L. major</i> | 76  | 64  | 139 |
| LmjF31.0960 | <i>L. major</i> | 65  | 487 | 551 |
| LmjF31.0970 | <i>L. major</i> | 41  | 28  | 68  |
| LmjF31.0970 | <i>L. major</i> | 84  | 105 | 188 |
| LmjF31.0970 | <i>L. major</i> | 104 | 341 | 444 |
| LmjF31.0970 | <i>L. major</i> | 227 | 557 | 783 |
| LmjF31.0980 | <i>L. major</i> | 56  | 1   | 56  |
| LmjF31.0980 | <i>L. major</i> | 249 | 475 | 723 |
| LmjF31.0990 | <i>L. major</i> | 275 | 131 | 405 |

|             |                 |     |      |      |
|-------------|-----------------|-----|------|------|
| LmjF31.1000 | <i>L. major</i> | 46  | 1    | 46   |
| LmjF31.1000 | <i>L. major</i> | 50  | 211  | 260  |
| LmjF31.1000 | <i>L. major</i> | 459 | 548  | 1006 |
| LmjF31.1010 | <i>L. major</i> | 175 | 1    | 175  |
| LmjF31.1010 | <i>L. major</i> | 54  | 194  | 247  |
| LmjF31.1010 | <i>L. major</i> | 62  | 525  | 586  |
| LmjF31.1020 | <i>L. major</i> | 73  | 1    | 73   |
| LmjF31.1020 | <i>L. major</i> | 95  | 113  | 207  |
| LmjF31.1020 | <i>L. major</i> | 257 | 238  | 494  |
| LmjF31.1020 | <i>L. major</i> | 52  | 712  | 763  |
| LmjF31.1020 | <i>L. major</i> | 50  | 804  | 853  |
| LmjF31.1020 | <i>L. major</i> | 72  | 858  | 929  |
| LmjF31.1030 | <i>L. major</i> | 60  | 1    | 60   |
| LmjF31.1030 | <i>L. major</i> | 86  | 105  | 190  |
| LmjF31.1030 | <i>L. major</i> | 222 | 318  | 539  |
| LmjF31.1030 | <i>L. major</i> | 40  | 727  | 766  |
| LmjF31.1030 | <i>L. major</i> | 42  | 818  | 859  |
| LmjF31.1040 | <i>L. major</i> | 71  | 1    | 71   |
| LmjF31.1040 | <i>L. major</i> | 45  | 198  | 242  |
| LmjF31.1040 | <i>L. major</i> | 69  | 269  | 337  |
| LmjF31.1040 | <i>L. major</i> | 40  | 371  | 410  |
| LmjF31.1040 | <i>L. major</i> | 43  | 505  | 547  |
| LmjF31.1040 | <i>L. major</i> | 64  | 572  | 635  |
| LmjF31.1050 | <i>L. major</i> | 388 | 1    | 388  |
| LmjF31.1060 | <i>L. major</i> | 45  | 233  | 277  |
| LmjF31.1060 | <i>L. major</i> | 56  | 403  | 458  |
| LmjF31.1080 | <i>L. major</i> | 157 | 25   | 181  |
| LmjF31.1080 | <i>L. major</i> | 777 | 198  | 974  |
| LmjF31.1090 | <i>L. major</i> | 50  | 1    | 50   |
| LmjF31.1090 | <i>L. major</i> | 489 | 130  | 618  |
| LmjF31.1150 | <i>L. major</i> | 167 | 1    | 167  |
| LmjF31.1150 | <i>L. major</i> | 73  | 251  | 323  |
| LmjF31.1150 | <i>L. major</i> | 176 | 573  | 748  |
| LmjF31.1150 | <i>L. major</i> | 155 | 784  | 938  |
| LmjF31.1150 | <i>L. major</i> | 119 | 946  | 1064 |
| LmjF31.1160 | <i>L. major</i> | 80  | 398  | 477  |
| LmjF31.1160 | <i>L. major</i> | 43  | 541  | 583  |
| LmjF31.1160 | <i>L. major</i> | 43  | 541  | 583  |
| LmjF31.1180 | <i>L. major</i> | 68  | 68   | 135  |
| LmjF31.1210 | <i>L. major</i> | 45  | 59   | 103  |
| LmjF31.1210 | <i>L. major</i> | 58  | 352  | 409  |
| LmjF31.1210 | <i>L. major</i> | 51  | 470  | 520  |
| LmjF31.1210 | <i>L. major</i> | 42  | 733  | 774  |
| LmjF31.1210 | <i>L. major</i> | 43  | 1084 | 1126 |
| LmjF31.1210 | <i>L. major</i> | 41  | 1301 | 1341 |
| LmjF31.1210 | <i>L. major</i> | 52  | 1555 | 1606 |
| LmjF31.1210 | <i>L. major</i> | 64  | 1688 | 1751 |

|             |                 |     |      |      |
|-------------|-----------------|-----|------|------|
| LmjF31.1210 | <i>L. major</i> | 89  | 2131 | 2219 |
| LmjF31.1210 | <i>L. major</i> | 94  | 2908 | 3001 |
| LmjF31.1210 | <i>L. major</i> | 51  | 3044 | 3094 |
| LmjF31.1210 | <i>L. major</i> | 40  | 3230 | 3269 |
| LmjF31.1210 | <i>L. major</i> | 43  | 3560 | 3602 |
| LmjF31.1210 | <i>L. major</i> | 45  | 3810 | 3854 |
| LmjF31.1210 | <i>L. major</i> | 108 | 4263 | 4370 |
| LmjF31.1210 | <i>L. major</i> | 57  | 4634 | 4690 |
| LmjF31.1210 | <i>L. major</i> | 138 | 4759 | 4896 |
| LmjF31.1230 | <i>L. major</i> | 82  | 350  | 431  |
| LmjF31.1230 | <i>L. major</i> | 40  | 500  | 539  |
| LmjF31.1230 | <i>L. major</i> | 131 | 691  | 821  |
| LmjF31.1240 | <i>L. major</i> | 401 | 1    | 401  |
| LmjF31.1240 | <i>L. major</i> | 320 | 407  | 726  |
| LmjF31.1240 | <i>L. major</i> | 257 | 747  | 1003 |
| LmjF31.1240 | <i>L. major</i> | 98  | 1087 | 1184 |
| LmjF31.1240 | <i>L. major</i> | 80  | 1214 | 1293 |
| LmjF31.1250 | <i>L. major</i> | 143 | 67   | 209  |
| LmjF31.1250 | <i>L. major</i> | 69  | 320  | 388  |
| LmjF31.1250 | <i>L. major</i> | 451 | 476  | 926  |
| LmjF31.1250 | <i>L. major</i> | 164 | 928  | 1091 |
| LmjF31.1260 | <i>L. major</i> | 84  | 85   | 168  |
| LmjF31.1260 | <i>L. major</i> | 101 | 281  | 381  |
| LmjF31.1260 | <i>L. major</i> | 130 | 434  | 563  |
| LmjF31.1270 | <i>L. major</i> | 50  | 1    | 50   |
| LmjF31.1270 | <i>L. major</i> | 41  | 182  | 222  |
| LmjF31.1270 | <i>L. major</i> | 78  | 682  | 759  |
| LmjF31.1270 | <i>L. major</i> | 68  | 977  | 1044 |
| LmjF31.1280 | <i>L. major</i> | 40  | 131  | 170  |
| LmjF31.1290 | <i>L. major</i> | 57  | 1    | 57   |
| LmjF31.1290 | <i>L. major</i> | 88  | 166  | 253  |
| LmjF31.1290 | <i>L. major</i> | 66  | 872  | 937  |
| LmjF31.1300 | <i>L. major</i> | 203 | 1    | 203  |
| LmjF31.1300 | <i>L. major</i> | 53  | 245  | 297  |
| LmjF31.1300 | <i>L. major</i> | 616 | 308  | 923  |
| LmjF31.1310 | <i>L. major</i> | 958 | 1    | 958  |
| LmjF31.1310 | <i>L. major</i> | 159 | 965  | 1123 |
| LmjF31.1310 | <i>L. major</i> | 149 | 1149 | 1297 |
| LmjF31.1310 | <i>L. major</i> | 224 | 1305 | 1528 |
| LmjF31.1320 | <i>L. major</i> | 578 | 1    | 578  |
| LmjF31.1320 | <i>L. major</i> | 650 | 591  | 1240 |
| LmjF31.1320 | <i>L. major</i> | 168 | 1246 | 1413 |
| LmjF31.1320 | <i>L. major</i> | 73  | 1457 | 1529 |
| LmjF31.1320 | <i>L. major</i> | 84  | 1689 | 1772 |
| LmjF31.1320 | <i>L. major</i> | 115 | 1829 | 1943 |
| LmjF31.1320 | <i>L. major</i> | 102 | 1998 | 2099 |
| LmjF31.1320 | <i>L. major</i> | 47  | 2131 | 2177 |

|             |                 |     |      |      |
|-------------|-----------------|-----|------|------|
| LmjF31.1320 | <i>L. major</i> | 58  | 2444 | 2501 |
| LmjF31.1330 | <i>L. major</i> | 595 | 1    | 595  |
| LmjF31.1330 | <i>L. major</i> | 132 | 637  | 768  |
| LmjF31.1330 | <i>L. major</i> | 119 | 933  | 1051 |
| LmjF31.1330 | <i>L. major</i> | 285 | 1060 | 1344 |
| LmjF31.1330 | <i>L. major</i> | 129 | 1394 | 1522 |
| LmjF31.1330 | <i>L. major</i> | 250 | 1553 | 1802 |
| LmjF31.1330 | <i>L. major</i> | 67  | 1839 | 1905 |
| LmjF31.1340 | <i>L. major</i> | 46  | 1    | 46   |
| LmjF31.1340 | <i>L. major</i> | 156 | 71   | 226  |
| LmjF31.1340 | <i>L. major</i> | 98  | 228  | 325  |
| LmjF31.1340 | <i>L. major</i> | 43  | 359  | 401  |
| LmjF31.1350 | <i>L. major</i> | 91  | 1    | 91   |
| LmjF31.1350 | <i>L. major</i> | 169 | 104  | 272  |
| LmjF31.1350 | <i>L. major</i> | 44  | 307  | 350  |
| LmjF31.1360 | <i>L. major</i> | 99  | 86   | 184  |
| LmjF31.1360 | <i>L. major</i> | 152 | 225  | 376  |
| LmjF31.1370 | <i>L. major</i> | 89  | 1    | 89   |
| LmjF31.1370 | <i>L. major</i> | 748 | 91   | 838  |
| LmjF31.1370 | <i>L. major</i> | 209 | 886  | 1094 |
| LmjF31.1380 | <i>L. major</i> | 383 | 1    | 383  |
| LmjF31.1380 | <i>L. major</i> | 342 | 385  | 726  |
| LmjF31.1380 | <i>L. major</i> | 54  | 753  | 806  |
| LmjF31.1380 | <i>L. major</i> | 136 | 813  | 948  |
| LmjF31.1380 | <i>L. major</i> | 113 | 956  | 1068 |
| LmjF31.1390 | <i>L. major</i> | 317 | 1    | 317  |
| LmjF31.1390 | <i>L. major</i> | 246 | 347  | 592  |
| LmjF31.1390 | <i>L. major</i> | 52  | 609  | 660  |
| LmjF31.1395 | <i>L. major</i> | 53  | 74   | 126  |
| LmjF31.1400 | <i>L. major</i> | 94  | 82   | 175  |
| LmjF31.1400 | <i>L. major</i> | 139 | 197  | 335  |
| LmjF31.1400 | <i>L. major</i> | 45  | 407  | 451  |
| LmjF31.1400 | <i>L. major</i> | 78  | 532  | 609  |
| LmjF31.1400 | <i>L. major</i> | 113 | 622  | 734  |
| LmjF31.1400 | <i>L. major</i> | 72  | 836  | 907  |
| LmjF31.1400 | <i>L. major</i> | 49  | 939  | 987  |
| LmjF31.1400 | <i>L. major</i> | 173 | 1083 | 1255 |
| LmjF31.1410 | <i>L. major</i> | 43  | 85   | 127  |
| LmjF31.1410 | <i>L. major</i> | 70  | 357  | 426  |
| LmjF31.1410 | <i>L. major</i> | 46  | 554  | 599  |
| LmjF31.1410 | <i>L. major</i> | 104 | 644  | 747  |
| LmjF31.1410 | <i>L. major</i> | 58  | 828  | 885  |
| LmjF31.1410 | <i>L. major</i> | 57  | 951  | 1007 |
| LmjF31.1410 | <i>L. major</i> | 57  | 1130 | 1186 |
| LmjF31.1410 | <i>L. major</i> | 274 | 1325 | 1598 |
| LmjF31.1410 | <i>L. major</i> | 544 | 1629 | 2172 |
| LmjF31.1410 | <i>L. major</i> | 72  | 2194 | 2265 |

|             |                 |     |      |      |
|-------------|-----------------|-----|------|------|
| LmjF31.1410 | <i>L. major</i> | 107 | 2279 | 2385 |
| LmjF31.1420 | <i>L. major</i> | 72  | 21   | 92   |
| LmjF31.1420 | <i>L. major</i> | 81  | 152  | 232  |
| LmjF31.1420 | <i>L. major</i> | 70  | 435  | 504  |
| LmjF31.1420 | <i>L. major</i> | 91  | 631  | 721  |
| LmjF31.1420 | <i>L. major</i> | 291 | 744  | 1034 |
| LmjF31.1420 | <i>L. major</i> | 79  | 1059 | 1137 |
| LmjF31.1430 | <i>L. major</i> | 47  | 663  | 709  |
| LmjF31.1430 | <i>L. major</i> | 41  | 795  | 835  |
| LmjF31.1430 | <i>L. major</i> | 144 | 966  | 1109 |
| LmjF31.1430 | <i>L. major</i> | 62  | 1746 | 1807 |
| LmjF31.1440 | <i>L. major</i> | 206 | 286  | 491  |
| LmjF31.1445 | <i>L. major</i> | 140 | 273  | 412  |
| LmjF31.1470 | <i>L. major</i> | 48  | 108  | 155  |
| LmjF31.1470 | <i>L. major</i> | 118 | 211  | 328  |
| LmjF31.1470 | <i>L. major</i> | 70  | 406  | 475  |
| LmjF31.1470 | <i>L. major</i> | 53  | 503  | 555  |
| LmjF31.1470 | <i>L. major</i> | 126 | 583  | 708  |
| LmjF31.1470 | <i>L. major</i> | 84  | 783  | 866  |
| LmjF31.1480 | <i>L. major</i> | 137 | 336  | 472  |
| LmjF31.1480 | <i>L. major</i> | 51  | 511  | 561  |
| LmjF31.1480 | <i>L. major</i> | 41  | 681  | 721  |
| LmjF31.1480 | <i>L. major</i> | 106 | 769  | 874  |
| LmjF31.1480 | <i>L. major</i> | 73  | 1149 | 1221 |
| LmjF31.1480 | <i>L. major</i> | 48  | 1395 | 1442 |
| LmjF31.1490 | <i>L. major</i> | 57  | 179  | 235  |
| LmjF31.1490 | <i>L. major</i> | 91  | 424  | 514  |
| LmjF31.1490 | <i>L. major</i> | 65  | 1154 | 1218 |
| LmjF31.1490 | <i>L. major</i> | 67  | 1296 | 1362 |
| LmjF31.1490 | <i>L. major</i> | 63  | 1393 | 1455 |
| LmjF31.1500 | <i>L. major</i> | 89  | 80   | 168  |
| LmjF31.1500 | <i>L. major</i> | 83  | 296  | 378  |
| LmjF31.1500 | <i>L. major</i> | 73  | 437  | 509  |
| LmjF31.1500 | <i>L. major</i> | 50  | 550  | 599  |
| LmjF31.1500 | <i>L. major</i> | 152 | 804  | 955  |
| LmjF31.1500 | <i>L. major</i> | 63  | 975  | 1037 |
| LmjF31.1500 | <i>L. major</i> | 91  | 1049 | 1139 |
| LmjF31.1510 | <i>L. major</i> | 40  | 330  | 369  |
| LmjF31.1510 | <i>L. major</i> | 110 | 509  | 618  |
| LmjF31.1510 | <i>L. major</i> | 41  | 745  | 785  |
| LmjF31.1510 | <i>L. major</i> | 392 | 850  | 1241 |
| LmjF31.1510 | <i>L. major</i> | 250 | 1288 | 1537 |
| LmjF31.1510 | <i>L. major</i> | 160 | 1539 | 1698 |
| LmjF31.1520 | <i>L. major</i> | 95  | 463  | 557  |
| LmjF31.1520 | <i>L. major</i> | 247 | 624  | 870  |
| LmjF31.1530 | <i>L. major</i> | 102 | 1    | 102  |
| LmjF31.1530 | <i>L. major</i> | 94  | 128  | 221  |

|             |                 |     |      |      |
|-------------|-----------------|-----|------|------|
| LmjF31.1530 | <i>L. major</i> | 217 | 228  | 444  |
| LmjF31.1530 | <i>L. major</i> | 45  | 483  | 527  |
| LmjF31.1530 | <i>L. major</i> | 72  | 621  | 692  |
| LmjF31.1530 | <i>L. major</i> | 154 | 708  | 861  |
| LmjF31.1530 | <i>L. major</i> | 199 | 910  | 1108 |
| LmjF31.1530 | <i>L. major</i> | 93  | 1116 | 1208 |
| LmjF31.1530 | <i>L. major</i> | 156 | 1312 | 1467 |
| LmjF31.1530 | <i>L. major</i> | 54  | 1570 | 1623 |
| LmjF31.1530 | <i>L. major</i> | 40  | 1750 | 1789 |
| LmjF31.1530 | <i>L. major</i> | 260 | 1839 | 2098 |
| LmjF31.1530 | <i>L. major</i> | 111 | 2112 | 2222 |
| LmjF31.1530 | <i>L. major</i> | 53  | 2227 | 2279 |
| LmjF31.1540 | <i>L. major</i> | 183 | 34   | 216  |
| LmjF31.1540 | <i>L. major</i> | 92  | 218  | 309  |
| LmjF31.1540 | <i>L. major</i> | 77  | 333  | 409  |
| LmjF31.1560 | <i>L. major</i> | 42  | 34   | 75   |
| LmjF31.1560 | <i>L. major</i> | 55  | 268  | 322  |
| LmjF31.1560 | <i>L. major</i> | 55  | 268  | 322  |
| LmjF31.1600 | <i>L. major</i> | 45  | 20   | 64   |
| LmjF31.1630 | <i>L. major</i> | 61  | 138  | 198  |
| LmjF31.1640 | <i>L. major</i> | 61  | 220  | 280  |
| LmjF31.1670 | <i>L. major</i> | 40  | 1    | 40   |
| LmjF31.1680 | <i>L. major</i> | 162 | 57   | 218  |
| LmjF31.1690 | <i>L. major</i> | 73  | 1    | 73   |
| LmjF31.1690 | <i>L. major</i> | 47  | 314  | 360  |
| LmjF31.1690 | <i>L. major</i> | 71  | 526  | 596  |
| LmjF31.1690 | <i>L. major</i> | 47  | 806  | 852  |
| LmjF31.1700 | <i>L. major</i> | 195 | 26   | 220  |
| LmjF31.1700 | <i>L. major</i> | 59  | 304  | 362  |
| LmjF31.1710 | <i>L. major</i> | 160 | 1    | 160  |
| LmjF31.1710 | <i>L. major</i> | 96  | 199  | 294  |
| LmjF31.1710 | <i>L. major</i> | 40  | 322  | 361  |
| LmjF31.1710 | <i>L. major</i> | 40  | 567  | 606  |
| LmjF31.1720 | <i>L. major</i> | 50  | 1    | 50   |
| LmjF31.1720 | <i>L. major</i> | 66  | 728  | 793  |
| LmjF31.1730 | <i>L. major</i> | 280 | 34   | 313  |
| LmjF31.1730 | <i>L. major</i> | 56  | 326  | 381  |
| LmjF31.1740 | <i>L. major</i> | 67  | 90   | 156  |
| LmjF31.1740 | <i>L. major</i> | 56  | 161  | 216  |
| LmjF31.1740 | <i>L. major</i> | 114 | 283  | 396  |
| LmjF31.1740 | <i>L. major</i> | 90  | 433  | 522  |
| LmjF31.1750 | <i>L. major</i> | 56  | 86   | 141  |
| LmjF31.1750 | <i>L. major</i> | 72  | 236  | 307  |
| LmjF31.1750 | <i>L. major</i> | 81  | 328  | 408  |
| LmjF31.1760 | <i>L. major</i> | 79  | 1    | 79   |
| LmjF31.1760 | <i>L. major</i> | 49  | 119  | 167  |
| LmjF31.1760 | <i>L. major</i> | 52  | 290  | 341  |

|             |                 |     |      |      |
|-------------|-----------------|-----|------|------|
| LmjF31.1770 | <i>L. major</i> | 97  | 47   | 143  |
| LmjF31.1770 | <i>L. major</i> | 65  | 320  | 384  |
| LmjF31.1770 | <i>L. major</i> | 402 | 615  | 1016 |
| LmjF31.1780 | <i>L. major</i> | 76  | 386  | 461  |
| LmjF31.1790 | <i>L. major</i> | 63  | 1    | 63   |
| LmjF31.1790 | <i>L. major</i> | 56  | 447  | 502  |
| LmjF31.1800 | <i>L. major</i> | 45  | 1    | 45   |
| LmjF31.1800 | <i>L. major</i> | 56  | 429  | 484  |
| LmjF31.1820 | <i>L. major</i> | 63  | 1    | 63   |
| LmjF31.1820 | <i>L. major</i> | 56  | 447  | 502  |
| LmjF31.1830 | <i>L. major</i> | 79  | 537  | 615  |
| LmjF31.1830 | <i>L. major</i> | 90  | 653  | 742  |
| LmjF31.1840 | <i>L. major</i> | 90  | 652  | 741  |
| LmjF31.1840 | <i>L. major</i> | 43  | 958  | 1000 |
| LmjF31.1855 | <i>L. major</i> | 41  | 34   | 74   |
| LmjF31.1860 | <i>L. major</i> | 40  | 15   | 54   |
| LmjF31.1860 | <i>L. major</i> | 61  | 111  | 171  |
| LmjF31.1860 | <i>L. major</i> | 61  | 111  | 171  |
| LmjF31.1870 | <i>L. major</i> | 56  | 1    | 56   |
| LmjF31.1870 | <i>L. major</i> | 66  | 901  | 966  |
| LmjF31.1870 | <i>L. major</i> | 66  | 901  | 966  |
| LmjF31.1880 | <i>L. major</i> | 66  | 781  | 846  |
| LmjF31.1890 | <i>L. major</i> | 101 | 1    | 101  |
| LmjF31.1910 | <i>L. major</i> | 275 | 17   | 291  |
| LmjF31.1910 | <i>L. major</i> | 79  | 336  | 414  |
| LmjF31.1910 | <i>L. major</i> | 101 | 423  | 523  |
| LmjF31.1910 | <i>L. major</i> | 48  | 548  | 595  |
| LmjF31.1910 | <i>L. major</i> | 200 | 618  | 817  |
| LmjF31.1920 | <i>L. major</i> | 174 | 143  | 316  |
| LmjF31.1920 | <i>L. major</i> | 217 | 618  | 834  |
| LmjF31.1920 | <i>L. major</i> | 99  | 843  | 941  |
| LmjF31.1920 | <i>L. major</i> | 114 | 1197 | 1310 |
| LmjF31.1930 | <i>L. major</i> | 40  | 72   | 111  |
| LmjF31.1930 | <i>L. major</i> | 84  | 533  | 616  |
| LmjF31.1930 | <i>L. major</i> | 84  | 533  | 616  |
| LmjF31.1940 | <i>L. major</i> | 274 | 53   | 326  |
| LmjF31.1940 | <i>L. major</i> | 82  | 345  | 426  |
| LmjF31.1940 | <i>L. major</i> | 55  | 431  | 485  |
| LmjF31.1950 | <i>L. major</i> | 327 | 45   | 371  |
| LmjF31.1950 | <i>L. major</i> | 161 | 412  | 572  |
| LmjF31.1980 | <i>L. major</i> | 41  | 1    | 41   |
| LmjF31.1980 | <i>L. major</i> | 71  | 150  | 220  |
| LmjF31.1980 | <i>L. major</i> | 71  | 150  | 220  |
| LmjF31.1990 | <i>L. major</i> | 337 | 49   | 385  |
| LmjF31.1990 | <i>L. major</i> | 139 | 496  | 634  |
| LmjF31.1990 | <i>L. major</i> | 40  | 670  | 709  |
| LmjF31.2010 | <i>L. major</i> | 222 | 1    | 222  |

|             |                 |      |     |      |
|-------------|-----------------|------|-----|------|
| LmjF31.2010 | <i>L. major</i> | 331  | 237 | 567  |
| LmjF31.2020 | <i>L. major</i> | 100  | 1   | 100  |
| LmjF31.2040 | <i>L. major</i> | 69   | 15  | 83   |
| LmjF31.2040 | <i>L. major</i> | 234  | 125 | 358  |
| LmjF31.2040 | <i>L. major</i> | 234  | 125 | 358  |
| LmjF31.2060 | <i>L. major</i> | 41   | 1   | 41   |
| LmjF31.2060 | <i>L. major</i> | 40   | 341 | 380  |
| LmjF31.2060 | <i>L. major</i> | 40   | 341 | 380  |
| LmjF31.2070 | <i>L. major</i> | 56   | 131 | 186  |
| LmjF31.2080 | <i>L. major</i> | 152  | 1   | 152  |
| LmjF31.2080 | <i>L. major</i> | 51   | 230 | 280  |
| LmjF31.2080 | <i>L. major</i> | 41   | 403 | 443  |
| LmjF31.2080 | <i>L. major</i> | 57   | 655 | 711  |
| LmjF31.2090 | <i>L. major</i> | 59   | 1   | 59   |
| LmjF31.2090 | <i>L. major</i> | 177  | 106 | 282  |
| LmjF31.2090 | <i>L. major</i> | 46   | 338 | 383  |
| LmjF31.2100 | <i>L. major</i> | 56   | 1   | 56   |
| LmjF31.2100 | <i>L. major</i> | 300  | 78  | 377  |
| LmjF31.2110 | <i>L. major</i> | 495  | 1   | 495  |
| LmjF31.2110 | <i>L. major</i> | 276  | 518 | 793  |
| LmjF31.2110 | <i>L. major</i> | 67   | 826 | 892  |
| LmjF31.2110 | <i>L. major</i> | 66   | 943 | 1008 |
| LmjF31.2115 | <i>L. major</i> | 360  | 1   | 360  |
| LmjF31.2120 | <i>L. major</i> | 74   | 29  | 102  |
| LmjF31.2120 | <i>L. major</i> | 79   | 142 | 220  |
| LmjF31.2120 | <i>L. major</i> | 152  | 233 | 384  |
| LmjF31.2120 | <i>L. major</i> | 70   | 448 | 517  |
| LmjF31.2120 | <i>L. major</i> | 225  | 539 | 763  |
| LmjF31.2130 | <i>L. major</i> | 69   | 1   | 69   |
| LmjF31.2130 | <i>L. major</i> | 43   | 345 | 387  |
| LmjF31.2130 | <i>L. major</i> | 43   | 688 | 730  |
| LmjF31.2140 | <i>L. major</i> | 1024 | 1   | 1024 |
| LmjF31.2160 | <i>L. major</i> | 327  | 1   | 327  |
| LmjF31.2160 | <i>L. major</i> | 62   | 348 | 409  |
| LmjF31.2160 | <i>L. major</i> | 273  | 421 | 693  |
| LmjF31.2180 | <i>L. major</i> | 291  | 1   | 291  |
| LmjF31.2180 | <i>L. major</i> | 541  | 320 | 860  |
| LmjF31.2190 | <i>L. major</i> | 358  | 1   | 358  |
| LmjF31.2190 | <i>L. major</i> | 312  | 406 | 717  |
| LmjF31.2200 | <i>L. major</i> | 84   | 1   | 84   |
| LmjF31.2200 | <i>L. major</i> | 76   | 155 | 230  |
| LmjF31.2200 | <i>L. major</i> | 94   | 233 | 326  |
| LmjF31.2200 | <i>L. major</i> | 90   | 338 | 427  |
| LmjF31.2210 | <i>L. major</i> | 42   | 116 | 157  |
| LmjF31.2210 | <i>L. major</i> | 185  | 177 | 361  |
| LmjF31.2210 | <i>L. major</i> | 80   | 384 | 463  |
| LmjF31.2210 | <i>L. major</i> | 79   | 466 | 544  |



|             |                 |     |      |      |
|-------------|-----------------|-----|------|------|
| LmjF31.2210 | <i>L. major</i> | 75  | 570  | 644  |
| LmjF31.2210 | <i>L. major</i> | 200 | 754  | 953  |
| LmjF31.2220 | <i>L. major</i> | 96  | 1    | 96   |
| LmjF31.2220 | <i>L. major</i> | 142 | 116  | 257  |
| LmjF31.2220 | <i>L. major</i> | 97  | 339  | 435  |
| LmjF31.2220 | <i>L. major</i> | 77  | 465  | 541  |
| LmjF31.2220 | <i>L. major</i> | 86  | 656  | 741  |
| LmjF31.2220 | <i>L. major</i> | 289 | 757  | 1045 |
| LmjF31.2220 | <i>L. major</i> | 411 | 1083 | 1493 |
| LmjF31.2220 | <i>L. major</i> | 185 | 1521 | 1705 |
| LmjF31.2220 | <i>L. major</i> | 51  | 1748 | 1798 |
| LmjF31.2220 | <i>L. major</i> | 210 | 1841 | 2050 |
| LmjF31.2220 | <i>L. major</i> | 81  | 2053 | 2133 |
| LmjF31.2230 | <i>L. major</i> | 280 | 1    | 280  |
| LmjF31.2230 | <i>L. major</i> | 108 | 342  | 449  |
| LmjF31.2240 | <i>L. major</i> | 84  | 69   | 152  |
| LmjF31.2250 | <i>L. major</i> | 57  | 60   | 116  |
| LmjF31.2250 | <i>L. major</i> | 65  | 316  | 380  |
| LmjF31.2260 | <i>L. major</i> | 52  | 164  | 215  |
| LmjF31.2260 | <i>L. major</i> | 45  | 534  | 578  |
| LmjF31.2270 | <i>L. major</i> | 130 | 1    | 130  |
| LmjF31.2320 | <i>L. major</i> | 49  | 46   | 94   |
| LmjF31.2320 | <i>L. major</i> | 48  | 347  | 394  |
| LmjF31.2320 | <i>L. major</i> | 123 | 564  | 686  |
| LmjF31.2320 | <i>L. major</i> | 44  | 733  | 776  |
| LmjF31.2320 | <i>L. major</i> | 57  | 880  | 936  |
| LmjF31.2330 | <i>L. major</i> | 48  | 38   | 85   |
| LmjF31.2340 | <i>L. major</i> | 86  | 1    | 86   |
| LmjF31.2350 | <i>L. major</i> | 61  | 1    | 61   |
| LmjF31.2350 | <i>L. major</i> | 57  | 217  | 273  |
| LmjF31.2350 | <i>L. major</i> | 51  | 618  | 668  |
| LmjF31.2350 | <i>L. major</i> | 44  | 1045 | 1088 |
| LmjF31.2350 | <i>L. major</i> | 56  | 1350 | 1405 |
| LmjF31.2360 | <i>L. major</i> | 118 | 52   | 169  |
| LmjF31.2360 | <i>L. major</i> | 75  | 184  | 258  |
| LmjF31.2360 | <i>L. major</i> | 150 | 280  | 429  |
| LmjF31.2360 | <i>L. major</i> | 53  | 432  | 484  |
| LmjF31.2370 | <i>L. major</i> | 82  | 43   | 124  |
| LmjF31.2380 | <i>L. major</i> | 98  | 1    | 98   |
| LmjF31.2380 | <i>L. major</i> | 81  | 143  | 223  |
| LmjF31.2380 | <i>L. major</i> | 88  | 253  | 340  |
| LmjF31.2380 | <i>L. major</i> | 310 | 366  | 675  |
| LmjF31.2380 | <i>L. major</i> | 52  | 709  | 760  |
| LmjF31.2380 | <i>L. major</i> | 47  | 770  | 816  |
| LmjF31.2390 | <i>L. major</i> | 74  | 205  | 278  |
| LmjF31.2400 | <i>L. major</i> | 101 | 53   | 153  |
| LmjF31.2400 | <i>L. major</i> | 185 | 166  | 350  |

|             |                 |     |      |      |
|-------------|-----------------|-----|------|------|
| LmjF31.2400 | <i>L. major</i> | 59  | 417  | 475  |
| LmjF31.2400 | <i>L. major</i> | 126 | 525  | 650  |
| LmjF31.2400 | <i>L. major</i> | 102 | 704  | 805  |
| LmjF31.2400 | <i>L. major</i> | 50  | 899  | 948  |
| LmjF31.2400 | <i>L. major</i> | 68  | 1058 | 1125 |
| LmjF31.2400 | <i>L. major</i> | 68  | 1158 | 1225 |
| LmjF31.2410 | <i>L. major</i> | 77  | 19   | 95   |
| LmjF31.2410 | <i>L. major</i> | 167 | 131  | 297  |
| LmjF31.2420 | <i>L. major</i> | 64  | 1    | 64   |
| LmjF31.2430 | <i>L. major</i> | 144 | 1    | 144  |
| LmjF31.2440 | <i>L. major</i> | 43  | 105  | 147  |
| LmjF31.2470 | <i>L. major</i> | 50  | 96   | 145  |
| LmjF31.2480 | <i>L. major</i> | 68  | 1    | 68   |
| LmjF31.2510 | <i>L. major</i> | 78  | 1    | 78   |
| LmjF31.2520 | <i>L. major</i> | 96  | 567  | 662  |
| LmjF31.2520 | <i>L. major</i> | 69  | 779  | 847  |
| LmjF31.2520 | <i>L. major</i> | 69  | 779  | 847  |
| LmjF31.2530 | <i>L. major</i> | 96  | 567  | 662  |
| LmjF31.2530 | <i>L. major</i> | 49  | 777  | 825  |
| LmjF31.2530 | <i>L. major</i> | 49  | 777  | 825  |
| LmjF31.2540 | <i>L. major</i> | 96  | 587  | 682  |
| LmjF31.2540 | <i>L. major</i> | 49  | 797  | 845  |
| LmjF31.2540 | <i>L. major</i> | 49  | 797  | 845  |
| LmjF31.2550 | <i>L. major</i> | 50  | 46   | 95   |
| LmjF31.2550 | <i>L. major</i> | 157 | 543  | 699  |
| LmjF31.2550 | <i>L. major</i> | 52  | 738  | 789  |
| LmjF31.2560 | <i>L. major</i> | 53  | 1    | 53   |
| LmjF31.2560 | <i>L. major</i> | 68  | 72   | 139  |
| LmjF31.2560 | <i>L. major</i> | 65  | 197  | 261  |
| LmjF31.2560 | <i>L. major</i> | 40  | 356  | 395  |
| LmjF31.2560 | <i>L. major</i> | 229 | 662  | 890  |
| LmjF31.2560 | <i>L. major</i> | 70  | 945  | 1014 |
| LmjF31.2570 | <i>L. major</i> | 185 | 114  | 298  |
| LmjF31.2570 | <i>L. major</i> | 274 | 551  | 824  |
| LmjF31.2570 | <i>L. major</i> | 213 | 837  | 1049 |
| LmjF31.2570 | <i>L. major</i> | 41  | 1071 | 1111 |
| LmjF31.2590 | <i>L. major</i> | 47  | 523  | 569  |
| LmjF31.2590 | <i>L. major</i> | 41  | 663  | 703  |
| LmjF31.2590 | <i>L. major</i> | 41  | 663  | 703  |
| LmjF31.2600 | <i>L. major</i> | 91  | 194  | 284  |
| LmjF31.2600 | <i>L. major</i> | 50  | 351  | 400  |
| LmjF31.2610 | <i>L. major</i> | 42  | 675  | 716  |
| LmjF31.2610 | <i>L. major</i> | 74  | 870  | 943  |
| LmjF31.2610 | <i>L. major</i> | 52  | 1463 | 1514 |
| LmjF31.2610 | <i>L. major</i> | 125 | 1538 | 1662 |
| LmjF31.2620 | <i>L. major</i> | 68  | 16   | 83   |
| LmjF31.2630 | <i>L. major</i> | 70  | 23   | 92   |

|             |                 |     |      |      |
|-------------|-----------------|-----|------|------|
| LmjF31.2640 | <i>L. major</i> | 107 | 1    | 107  |
| LmjF31.2655 | <i>L. major</i> | 577 | 1    | 577  |
| LmjF31.2670 | <i>L. major</i> | 109 | 50   | 158  |
| LmjF31.2670 | <i>L. major</i> | 162 | 228  | 389  |
| LmjF31.2670 | <i>L. major</i> | 97  | 426  | 522  |
| LmjF31.2670 | <i>L. major</i> | 52  | 571  | 622  |
| LmjF31.2670 | <i>L. major</i> | 198 | 644  | 841  |
| LmjF31.2690 | <i>L. major</i> | 83  | 309  | 391  |
| LmjF31.2690 | <i>L. major</i> | 47  | 439  | 485  |
| LmjF31.2690 | <i>L. major</i> | 41  | 506  | 546  |
| LmjF31.2690 | <i>L. major</i> | 78  | 656  | 733  |
| LmjF31.2690 | <i>L. major</i> | 50  | 751  | 800  |
| LmjF31.2690 | <i>L. major</i> | 46  | 983  | 1028 |
| LmjF31.2690 | <i>L. major</i> | 53  | 1036 | 1088 |
| LmjF31.2690 | <i>L. major</i> | 51  | 1208 | 1258 |
| LmjF31.2700 | <i>L. major</i> | 53  | 632  | 684  |
| LmjF31.2700 | <i>L. major</i> | 51  | 781  | 831  |
| LmjF31.2700 | <i>L. major</i> | 51  | 781  | 831  |
| LmjF31.2710 | <i>L. major</i> | 453 | 265  | 717  |
| LmjF31.2720 | <i>L. major</i> | 54  | 18   | 71   |
| LmjF31.2720 | <i>L. major</i> | 42  | 105  | 146  |
| LmjF31.2720 | <i>L. major</i> | 42  | 105  | 146  |
| LmjF31.2750 | <i>L. major</i> | 204 | 1    | 204  |
| LmjF31.2750 | <i>L. major</i> | 158 | 241  | 398  |
| LmjF31.2760 | <i>L. major</i> | 800 | 1    | 800  |
| LmjF31.2760 | <i>L. major</i> | 119 | 809  | 927  |
| LmjF31.2760 | <i>L. major</i> | 250 | 942  | 1191 |
| LmjF31.2760 | <i>L. major</i> | 48  | 1240 | 1287 |
| LmjF31.2770 | <i>L. major</i> | 95  | 117  | 211  |
| LmjF31.2770 | <i>L. major</i> | 85  | 228  | 312  |
| LmjF31.2780 | <i>L. major</i> | 228 | 10   | 237  |
| LmjF31.2800 | <i>L. major</i> | 183 | 1    | 183  |
| LmjF31.2810 | <i>L. major</i> | 112 | 68   | 179  |
| LmjF31.2810 | <i>L. major</i> | 49  | 231  | 279  |
| LmjF31.2820 | <i>L. major</i> | 51  | 220  | 270  |
| LmjF31.2830 | <i>L. major</i> | 215 | 14   | 228  |
| LmjF31.2830 | <i>L. major</i> | 251 | 375  | 625  |
| LmjF31.2840 | <i>L. major</i> | 106 | 1    | 106  |
| LmjF31.2850 | <i>L. major</i> | 76  | 71   | 146  |
| LmjF31.2860 | <i>L. major</i> | 129 | 1    | 129  |
| LmjF31.2860 | <i>L. major</i> | 73  | 139  | 211  |
| LmjF31.2860 | <i>L. major</i> | 55  | 253  | 307  |
| LmjF31.2880 | <i>L. major</i> | 48  | 1    | 48   |
| LmjF31.2880 | <i>L. major</i> | 43  | 244  | 286  |
| LmjF31.2880 | <i>L. major</i> | 43  | 244  | 286  |
| LmjF31.2890 | <i>L. major</i> | 102 | 125  | 226  |
| LmjF31.2890 | <i>L. major</i> | 42  | 295  | 336  |

|             |                 |     |      |      |
|-------------|-----------------|-----|------|------|
| LmjF31.2890 | <i>L. major</i> | 56  | 811  | 866  |
| LmjF31.2890 | <i>L. major</i> | 49  | 1134 | 1182 |
| LmjF31.2890 | <i>L. major</i> | 49  | 1192 | 1240 |
| LmjF31.2900 | <i>L. major</i> | 190 | 1    | 190  |
| LmjF31.2900 | <i>L. major</i> | 73  | 337  | 409  |
| LmjF31.2900 | <i>L. major</i> | 73  | 337  | 409  |
| LmjF31.2910 | <i>L. major</i> | 166 | 82   | 247  |
| LmjF31.2950 | <i>L. major</i> | 40  | 1    | 40   |
| LmjF31.2970 | <i>L. major</i> | 83  | 1325 | 1407 |
| LmjF31.2970 | <i>L. major</i> | 43  | 2126 | 2168 |
| LmjF31.2970 | <i>L. major</i> | 43  | 2126 | 2168 |
| LmjF31.2980 | <i>L. major</i> | 49  | 702  | 750  |
| LmjF31.2980 | <i>L. major</i> | 56  | 756  | 811  |
| LmjF31.2980 | <i>L. major</i> | 169 | 819  | 987  |
| LmjF31.2990 | <i>L. major</i> | 52  | 1    | 52   |
| LmjF31.2990 | <i>L. major</i> | 52  | 136  | 187  |
| LmjF31.2990 | <i>L. major</i> | 152 | 223  | 374  |
| LmjF31.2990 | <i>L. major</i> | 58  | 437  | 494  |
| LmjF31.2990 | <i>L. major</i> | 113 | 517  | 629  |
| LmjF31.2990 | <i>L. major</i> | 96  | 743  | 838  |
| LmjF31.2990 | <i>L. major</i> | 42  | 919  | 960  |
| LmjF31.2990 | <i>L. major</i> | 104 | 1031 | 1134 |
| LmjF31.2990 | <i>L. major</i> | 79  | 1211 | 1289 |
| LmjF31.2990 | <i>L. major</i> | 114 | 1337 | 1450 |
| LmjF31.2990 | <i>L. major</i> | 226 | 1465 | 1690 |
| LmjF31.2990 | <i>L. major</i> | 170 | 1766 | 1935 |
| LmjF31.3000 | <i>L. major</i> | 58  | 155  | 212  |
| LmjF31.3000 | <i>L. major</i> | 317 | 301  | 617  |
| LmjF31.3000 | <i>L. major</i> | 177 | 687  | 863  |
| LmjF31.3000 | <i>L. major</i> | 40  | 889  | 928  |
| LmjF31.3010 | <i>L. major</i> | 41  | 56   | 96   |
| LmjF31.3010 | <i>L. major</i> | 107 | 120  | 226  |
| LmjF31.3010 | <i>L. major</i> | 82  | 260  | 341  |
| LmjF31.3010 | <i>L. major</i> | 148 | 374  | 521  |
| LmjF31.3020 | <i>L. major</i> | 79  | 206  | 284  |
| LmjF31.3020 | <i>L. major</i> | 82  | 287  | 368  |
| LmjF31.3020 | <i>L. major</i> | 152 | 443  | 594  |
| LmjF31.3030 | <i>L. major</i> | 116 | 60   | 175  |
| LmjF31.3030 | <i>L. major</i> | 645 | 213  | 857  |
| LmjF31.3030 | <i>L. major</i> | 63  | 893  | 955  |
| LmjF31.3030 | <i>L. major</i> | 191 | 1030 | 1220 |
| LmjF31.3030 | <i>L. major</i> | 73  | 1222 | 1294 |
| LmjF31.3030 | <i>L. major</i> | 88  | 1311 | 1398 |
| LmjF31.3030 | <i>L. major</i> | 246 | 1400 | 1645 |
| LmjF31.3030 | <i>L. major</i> | 108 | 1667 | 1774 |
| LmjF31.3040 | <i>L. major</i> | 87  | 1    | 87   |
| LmjF31.3040 | <i>L. major</i> | 96  | 153  | 248  |

|             |                 |     |      |      |
|-------------|-----------------|-----|------|------|
| LmjF31.3040 | <i>L. major</i> | 96  | 153  | 248  |
| LmjF31.3060 | <i>L. major</i> | 95  | 162  | 256  |
| LmjF31.3070 | <i>L. major</i> | 95  | 162  | 256  |
| LmjF31.3090 | <i>L. major</i> | 65  | 491  | 555  |
| LmjF31.3090 | <i>L. major</i> | 54  | 1053 | 1106 |
| LmjF31.3110 | <i>L. major</i> | 846 | 1    | 846  |
| LmjF31.3120 | <i>L. major</i> | 48  | 535  | 582  |
| LmjF31.3150 | <i>L. major</i> | 47  | 657  | 703  |
| LmjF31.3150 | <i>L. major</i> | 89  | 968  | 1056 |
| LmjF31.3150 | <i>L. major</i> | 72  | 1072 | 1143 |
| LmjF31.3150 | <i>L. major</i> | 58  | 1412 | 1469 |
| LmjF31.3170 | <i>L. major</i> | 40  | 323  | 362  |
| LmjF31.3180 | <i>L. major</i> | 49  | 1    | 49   |
| LmjF31.3190 | <i>L. major</i> | 90  | 1    | 90   |
| LmjF31.3190 | <i>L. major</i> | 51  | 136  | 186  |
| LmjF32.0020 | <i>L. major</i> | 58  | 57   | 114  |
| LmjF32.0020 | <i>L. major</i> | 209 | 203  | 411  |
| LmjF32.0030 | <i>L. major</i> | 96  | 243  | 338  |
| LmjF32.0040 | <i>L. major</i> | 98  | 245  | 342  |
| LmjF32.0060 | <i>L. major</i> | 75  | 1    | 75   |
| LmjF32.0060 | <i>L. major</i> | 50  | 262  | 311  |
| LmjF32.0060 | <i>L. major</i> | 50  | 262  | 311  |
| LmjF32.0070 | <i>L. major</i> | 152 | 1    | 152  |
| LmjF32.0080 | <i>L. major</i> | 48  | 1    | 48   |
| LmjF32.0090 | <i>L. major</i> | 43  | 155  | 197  |
| LmjF32.0120 | <i>L. major</i> | 156 | 1    | 156  |
| LmjF32.0120 | <i>L. major</i> | 45  | 166  | 210  |
| LmjF32.0120 | <i>L. major</i> | 135 | 545  | 679  |
| LmjF32.0120 | <i>L. major</i> | 183 | 732  | 914  |
| LmjF32.0120 | <i>L. major</i> | 113 | 964  | 1076 |
| LmjF32.0140 | <i>L. major</i> | 53  | 53   | 105  |
| LmjF32.0140 | <i>L. major</i> | 84  | 117  | 200  |
| LmjF32.0140 | <i>L. major</i> | 43  | 819  | 861  |
| LmjF32.0150 | <i>L. major</i> | 277 | 1    | 277  |
| LmjF32.0150 | <i>L. major</i> | 55  | 327  | 381  |
| LmjF32.0150 | <i>L. major</i> | 502 | 385  | 886  |
| LmjF32.0150 | <i>L. major</i> | 71  | 929  | 999  |
| LmjF32.0160 | <i>L. major</i> | 146 | 1    | 146  |
| LmjF32.0160 | <i>L. major</i> | 74  | 195  | 268  |
| LmjF32.0160 | <i>L. major</i> | 106 | 281  | 386  |
| LmjF32.0170 | <i>L. major</i> | 134 | 175  | 308  |
| LmjF32.0190 | <i>L. major</i> | 55  | 551  | 605  |
| LmjF32.0200 | <i>L. major</i> | 120 | 63   | 182  |
| LmjF32.0200 | <i>L. major</i> | 149 | 195  | 343  |
| LmjF32.0210 | <i>L. major</i> | 122 | 423  | 544  |
| LmjF32.0220 | <i>L. major</i> | 116 | 89   | 204  |
| LmjF32.0220 | <i>L. major</i> | 151 | 271  | 421  |

|             |                 |      |      |      |
|-------------|-----------------|------|------|------|
| LmjF32.0220 | <i>L. major</i> | 43   | 580  | 622  |
| LmjF32.0220 | <i>L. major</i> | 121  | 732  | 852  |
| LmjF32.0240 | <i>L. major</i> | 46   | 172  | 217  |
| LmjF32.0240 | <i>L. major</i> | 154  | 417  | 570  |
| LmjF32.0240 | <i>L. major</i> | 482  | 604  | 1085 |
| LmjF32.0250 | <i>L. major</i> | 239  | 1    | 239  |
| LmjF32.0250 | <i>L. major</i> | 51   | 350  | 400  |
| LmjF32.0250 | <i>L. major</i> | 73   | 697  | 769  |
| LmjF32.0250 | <i>L. major</i> | 102  | 1311 | 1412 |
| LmjF32.0250 | <i>L. major</i> | 117  | 1417 | 1533 |
| LmjF32.0250 | <i>L. major</i> | 250  | 1537 | 1786 |
| LmjF32.0260 | <i>L. major</i> | 1089 | 261  | 1349 |
| LmjF32.0270 | <i>L. major</i> | 61   | 838  | 898  |
| LmjF32.0270 | <i>L. major</i> | 121  | 1182 | 1302 |
| LmjF32.0290 | <i>L. major</i> | 123  | 99   | 221  |
| LmjF32.0300 | <i>L. major</i> | 94   | 1    | 94   |
| LmjF32.0300 | <i>L. major</i> | 55   | 110  | 164  |
| LmjF32.0300 | <i>L. major</i> | 63   | 455  | 517  |
| LmjF32.0300 | <i>L. major</i> | 171  | 582  | 752  |
| LmjF32.0310 | <i>L. major</i> | 55   | 596  | 650  |
| LmjF32.0310 | <i>L. major</i> | 55   | 727  | 781  |
| LmjF32.0310 | <i>L. major</i> | 48   | 1505 | 1552 |
| LmjF32.0330 | <i>L. major</i> | 161  | 1    | 161  |
| LmjF32.0330 | <i>L. major</i> | 44   | 412  | 455  |
| LmjF32.0330 | <i>L. major</i> | 478  | 601  | 1078 |
| LmjF32.0330 | <i>L. major</i> | 49   | 1188 | 1236 |
| LmjF32.0330 | <i>L. major</i> | 56   | 1272 | 1327 |
| LmjF32.0330 | <i>L. major</i> | 182  | 1372 | 1553 |
| LmjF32.0340 | <i>L. major</i> | 44   | 74   | 117  |
| LmjF32.0340 | <i>L. major</i> | 264  | 361  | 624  |
| LmjF32.0350 | <i>L. major</i> | 195  | 33   | 227  |
| LmjF32.0350 | <i>L. major</i> | 100  | 371  | 470  |
| LmjF32.0360 | <i>L. major</i> | 203  | 1    | 203  |
| LmjF32.0360 | <i>L. major</i> | 86   | 209  | 294  |
| LmjF32.0360 | <i>L. major</i> | 60   | 307  | 366  |
| LmjF32.0370 | <i>L. major</i> | 47   | 297  | 343  |
| LmjF32.0370 | <i>L. major</i> | 58   | 678  | 735  |
| LmjF32.0370 | <i>L. major</i> | 58   | 678  | 735  |
| LmjF32.0380 | <i>L. major</i> | 228  | 1    | 228  |
| LmjF32.0380 | <i>L. major</i> | 118  | 257  | 374  |
| LmjF32.0400 | <i>L. major</i> | 110  | 1    | 110  |
| LmjF32.0400 | <i>L. major</i> | 102  | 513  | 614  |
| LmjF32.0410 | <i>L. major</i> | 59   | 1    | 59   |
| LmjF32.0410 | <i>L. major</i> | 51   | 262  | 312  |
| LmjF32.0410 | <i>L. major</i> | 43   | 357  | 399  |
| LmjF32.0440 | <i>L. major</i> | 57   | 22   | 78   |
| LmjF32.0450 | <i>L. major</i> | 47   | 1    | 47   |

|             |                 |     |      |      |
|-------------|-----------------|-----|------|------|
| LmjF32.0470 | <i>L. major</i> | 112 | 146  | 257  |
| LmjF32.0470 | <i>L. major</i> | 125 | 341  | 465  |
| LmjF32.0473 | <i>L. major</i> | 44  | 1    | 44   |
| LmjF32.0480 | <i>L. major</i> | 69  | 1    | 69   |
| LmjF32.0480 | <i>L. major</i> | 47  | 114  | 160  |
| LmjF32.0480 | <i>L. major</i> | 86  | 298  | 383  |
| LmjF32.0510 | <i>L. major</i> | 41  | 205  | 245  |
| LmjF32.0530 | <i>L. major</i> | 123 | 23   | 145  |
| LmjF32.0540 | <i>L. major</i> | 80  | 218  | 297  |
| LmjF32.0560 | <i>L. major</i> | 47  | 80   | 126  |
| LmjF32.0570 | <i>L. major</i> | 107 | 1    | 107  |
| LmjF32.0570 | <i>L. major</i> | 69  | 512  | 580  |
| LmjF32.0570 | <i>L. major</i> | 69  | 512  | 580  |
| LmjF32.0580 | <i>L. major</i> | 148 | 113  | 260  |
| LmjF32.0580 | <i>L. major</i> | 207 | 316  | 522  |
| LmjF32.0590 | <i>L. major</i> | 80  | 93   | 172  |
| LmjF32.0590 | <i>L. major</i> | 48  | 225  | 272  |
| LmjF32.0600 | <i>L. major</i> | 71  | 382  | 452  |
| LmjF32.0600 | <i>L. major</i> | 43  | 518  | 560  |
| LmjF32.0600 | <i>L. major</i> | 43  | 518  | 560  |
| LmjF32.0610 | <i>L. major</i> | 47  | 161  | 207  |
| LmjF32.0620 | <i>L. major</i> | 239 | 1    | 239  |
| LmjF32.0620 | <i>L. major</i> | 40  | 326  | 365  |
| LmjF32.0640 | <i>L. major</i> | 60  | 1    | 60   |
| LmjF32.0640 | <i>L. major</i> | 108 | 498  | 605  |
| LmjF32.0650 | <i>L. major</i> | 50  | 32   | 81   |
| LmjF32.0660 | <i>L. major</i> | 45  | 1    | 45   |
| LmjF32.0660 | <i>L. major</i> | 45  | 119  | 163  |
| LmjF32.0660 | <i>L. major</i> | 45  | 119  | 163  |
| LmjF32.0670 | <i>L. major</i> | 47  | 198  | 244  |
| LmjF32.0680 | <i>L. major</i> | 130 | 335  | 464  |
| LmjF32.0680 | <i>L. major</i> | 153 | 515  | 667  |
| LmjF32.0680 | <i>L. major</i> | 310 | 808  | 1117 |
| LmjF32.0690 | <i>L. major</i> | 62  | 1    | 62   |
| LmjF32.0700 | <i>L. major</i> | 86  | 149  | 234  |
| LmjF32.0720 | <i>L. major</i> | 113 | 1    | 113  |
| LmjF32.0730 | <i>L. major</i> | 331 | 267  | 597  |
| LmjF32.0740 | <i>L. major</i> | 41  | 82   | 122  |
| LmjF32.0750 | <i>L. major</i> | 61  | 1    | 61   |
| LmjF32.0770 | <i>L. major</i> | 166 | 204  | 369  |
| LmjF32.0770 | <i>L. major</i> | 43  | 806  | 848  |
| LmjF32.0770 | <i>L. major</i> | 103 | 964  | 1066 |
| LmjF32.0770 | <i>L. major</i> | 70  | 1298 | 1367 |
| LmjF32.0780 | <i>L. major</i> | 98  | 91   | 188  |
| LmjF32.0780 | <i>L. major</i> | 258 | 515  | 772  |
| LmjF32.0800 | <i>L. major</i> | 62  | 108  | 169  |
| LmjF32.0800 | <i>L. major</i> | 96  | 280  | 375  |

|             |                 |     |      |      |
|-------------|-----------------|-----|------|------|
| LmjF32.0800 | <i>L. major</i> | 47  | 475  | 521  |
| LmjF32.0810 | <i>L. major</i> | 95  | 1    | 95   |
| LmjF32.0810 | <i>L. major</i> | 189 | 891  | 1079 |
| LmjF32.0830 | <i>L. major</i> | 258 | 197  | 454  |
| LmjF32.0840 | <i>L. major</i> | 306 | 1    | 306  |
| LmjF32.0850 | <i>L. major</i> | 175 | 34   | 208  |
| LmjF32.0850 | <i>L. major</i> | 187 | 282  | 468  |
| LmjF32.0850 | <i>L. major</i> | 108 | 656  | 763  |
| LmjF32.0860 | <i>L. major</i> | 45  | 326  | 370  |
| LmjF32.0860 | <i>L. major</i> | 48  | 426  | 473  |
| LmjF32.0860 | <i>L. major</i> | 52  | 528  | 579  |
| LmjF32.0870 | <i>L. major</i> | 40  | 134  | 173  |
| LmjF32.0900 | <i>L. major</i> | 77  | 57   | 133  |
| LmjF32.0920 | <i>L. major</i> | 47  | 75   | 121  |
| LmjF32.0920 | <i>L. major</i> | 76  | 692  | 767  |
| LmjF32.0920 | <i>L. major</i> | 76  | 692  | 767  |
| LmjF32.0930 | <i>L. major</i> | 73  | 632  | 704  |
| LmjF32.0940 | <i>L. major</i> | 150 | 251  | 400  |
| LmjF32.0940 | <i>L. major</i> | 168 | 656  | 823  |
| LmjF32.0940 | <i>L. major</i> | 168 | 656  | 823  |
| LmjF32.0950 | <i>L. major</i> | 40  | 127  | 166  |
| LmjF32.0950 | <i>L. major</i> | 48  | 305  | 352  |
| LmjF32.0960 | <i>L. major</i> | 87  | 148  | 234  |
| LmjF32.0970 | <i>L. major</i> | 45  | 48   | 92   |
| LmjF32.0970 | <i>L. major</i> | 44  | 159  | 202  |
| LmjF32.0970 | <i>L. major</i> | 98  | 451  | 548  |
| LmjF32.0970 | <i>L. major</i> | 60  | 609  | 668  |
| LmjF32.0970 | <i>L. major</i> | 78  | 710  | 787  |
| LmjF32.0970 | <i>L. major</i> | 81  | 973  | 1053 |
| LmjF32.0970 | <i>L. major</i> | 55  | 1116 | 1170 |
| LmjF32.0970 | <i>L. major</i> | 47  | 1245 | 1291 |
| LmjF32.0970 | <i>L. major</i> | 127 | 1357 | 1483 |
| LmjF32.0970 | <i>L. major</i> | 281 | 1528 | 1808 |
| LmjF32.0980 | <i>L. major</i> | 93  | 1    | 93   |
| LmjF32.0980 | <i>L. major</i> | 60  | 96   | 155  |
| LmjF32.0980 | <i>L. major</i> | 87  | 283  | 369  |
| LmjF32.0980 | <i>L. major</i> | 43  | 439  | 481  |
| LmjF32.0985 | <i>L. major</i> | 49  | 334  | 382  |
| LmjF32.0990 | <i>L. major</i> | 521 | 1    | 521  |
| LmjF32.0990 | <i>L. major</i> | 113 | 527  | 639  |
| LmjF32.0990 | <i>L. major</i> | 84  | 1113 | 1196 |
| LmjF32.0990 | <i>L. major</i> | 49  | 1309 | 1357 |
| LmjF32.0990 | <i>L. major</i> | 42  | 1394 | 1435 |
| LmjF32.1000 | <i>L. major</i> | 50  | 230  | 279  |
| LmjF32.1010 | <i>L. major</i> | 149 | 196  | 344  |
| LmjF32.1020 | <i>L. major</i> | 46  | 50   | 95   |
| LmjF32.1020 | <i>L. major</i> | 195 | 169  | 363  |



|             |                 |     |      |      |
|-------------|-----------------|-----|------|------|
| LmjF32.1020 | <i>L. major</i> | 43  | 744  | 786  |
| LmjF32.1040 | <i>L. major</i> | 44  | 49   | 92   |
| LmjF32.1040 | <i>L. major</i> | 78  | 145  | 222  |
| LmjF32.1040 | <i>L. major</i> | 100 | 254  | 353  |
| LmjF32.1040 | <i>L. major</i> | 88  | 397  | 484  |
| LmjF32.1060 | <i>L. major</i> | 43  | 34   | 76   |
| LmjF32.1060 | <i>L. major</i> | 93  | 509  | 601  |
| LmjF32.1060 | <i>L. major</i> | 93  | 509  | 601  |
| LmjF32.1080 | <i>L. major</i> | 44  | 145  | 188  |
| LmjF32.1090 | <i>L. major</i> | 52  | 297  | 348  |
| LmjF32.1090 | <i>L. major</i> | 76  | 365  | 440  |
| LmjF32.1090 | <i>L. major</i> | 106 | 831  | 936  |
| LmjF32.1090 | <i>L. major</i> | 63  | 957  | 1019 |
| LmjF32.1130 | <i>L. major</i> | 828 | 1    | 828  |
| LmjF32.1130 | <i>L. major</i> | 367 | 833  | 1199 |
| LmjF32.1130 | <i>L. major</i> | 186 | 1201 | 1386 |
| LmjF32.1130 | <i>L. major</i> | 186 | 1422 | 1607 |
| LmjF32.1140 | <i>L. major</i> | 111 | 1    | 111  |
| LmjF32.1140 | <i>L. major</i> | 79  | 281  | 359  |
| LmjF32.1140 | <i>L. major</i> | 49  | 428  | 476  |
| LmjF32.1160 | <i>L. major</i> | 67  | 315  | 381  |
| LmjF32.1170 | <i>L. major</i> | 83  | 279  | 361  |
| LmjF32.1180 | <i>L. major</i> | 120 | 149  | 268  |
| LmjF32.1180 | <i>L. major</i> | 248 | 413  | 660  |
| LmjF32.1190 | <i>L. major</i> | 198 | 1    | 198  |
| LmjF32.1190 | <i>L. major</i> | 135 | 252  | 386  |
| LmjF32.1190 | <i>L. major</i> | 96  | 440  | 535  |
| LmjF32.1210 | <i>L. major</i> | 52  | 370  | 421  |
| LmjF32.1220 | <i>L. major</i> | 150 | 400  | 549  |
| LmjF32.1220 | <i>L. major</i> | 118 | 571  | 688  |
| LmjF32.1220 | <i>L. major</i> | 84  | 714  | 797  |
| LmjF32.1230 | <i>L. major</i> | 157 | 246  | 402  |
| LmjF32.1240 | <i>L. major</i> | 54  | 112  | 165  |
| LmjF32.1240 | <i>L. major</i> | 86  | 460  | 545  |
| LmjF32.1240 | <i>L. major</i> | 86  | 460  | 545  |
| LmjF32.1250 | <i>L. major</i> | 126 | 72   | 197  |
| LmjF32.1270 | <i>L. major</i> | 70  | 1    | 70   |
| LmjF32.1270 | <i>L. major</i> | 184 | 171  | 354  |
| LmjF32.1270 | <i>L. major</i> | 41  | 455  | 495  |
| LmjF32.1270 | <i>L. major</i> | 60  | 590  | 649  |
| LmjF32.1290 | <i>L. major</i> | 114 | 55   | 168  |
| LmjF32.1290 | <i>L. major</i> | 43  | 193  | 235  |
| LmjF32.1290 | <i>L. major</i> | 41  | 295  | 335  |
| LmjF32.1300 | <i>L. major</i> | 57  | 14   | 70   |
| LmjF32.1310 | <i>L. major</i> | 272 | 111  | 382  |
| LmjF32.1320 | <i>L. major</i> | 256 | 90   | 345  |
| LmjF32.1320 | <i>L. major</i> | 59  | 390  | 448  |

|             |                 |     |      |      |
|-------------|-----------------|-----|------|------|
| LmjF32.1330 | <i>L. major</i> | 141 | 1    | 141  |
| LmjF32.1340 | <i>L. major</i> | 110 | 174  | 283  |
| LmjF32.1340 | <i>L. major</i> | 45  | 662  | 706  |
| LmjF32.1350 | <i>L. major</i> | 87  | 1    | 87   |
| LmjF32.1360 | <i>L. major</i> | 136 | 1    | 136  |
| LmjF32.1370 | <i>L. major</i> | 255 | 1    | 255  |
| LmjF32.1370 | <i>L. major</i> | 45  | 285  | 329  |
| LmjF32.1380 | <i>L. major</i> | 226 | 83   | 308  |
| LmjF32.1390 | <i>L. major</i> | 50  | 98   | 147  |
| LmjF32.1390 | <i>L. major</i> | 107 | 646  | 752  |
| LmjF32.1400 | <i>L. major</i> | 49  | 629  | 677  |
| LmjF32.1400 | <i>L. major</i> | 69  | 894  | 962  |
| LmjF32.1400 | <i>L. major</i> | 77  | 971  | 1047 |
| LmjF32.1400 | <i>L. major</i> | 407 | 1050 | 1456 |
| LmjF32.1400 | <i>L. major</i> | 217 | 1475 | 1691 |
| LmjF32.1430 | <i>L. major</i> | 486 | 1    | 486  |
| LmjF32.1430 | <i>L. major</i> | 186 | 808  | 993  |
| LmjF32.1460 | <i>L. major</i> | 52  | 206  | 257  |
| LmjF32.1460 | <i>L. major</i> | 47  | 719  | 765  |
| LmjF32.1460 | <i>L. major</i> | 85  | 866  | 950  |
| LmjF32.1460 | <i>L. major</i> | 58  | 1397 | 1454 |
| LmjF32.1460 | <i>L. major</i> | 45  | 2389 | 2433 |
| LmjF32.1470 | <i>L. major</i> | 104 | 119  | 222  |
| LmjF32.1480 | <i>L. major</i> | 62  | 189  | 250  |
| LmjF32.1480 | <i>L. major</i> | 51  | 422  | 472  |
| LmjF32.1490 | <i>L. major</i> | 190 | 1    | 190  |
| LmjF32.1495 | <i>L. major</i> | 59  | 60   | 118  |
| LmjF32.1495 | <i>L. major</i> | 106 | 144  | 249  |
| LmjF32.1495 | <i>L. major</i> | 106 | 144  | 249  |
| LmjF32.1500 | <i>L. major</i> | 116 | 1    | 116  |
| LmjF32.1500 | <i>L. major</i> | 57  | 164  | 220  |
| LmjF32.1500 | <i>L. major</i> | 50  | 415  | 464  |
| LmjF32.1510 | <i>L. major</i> | 127 | 104  | 230  |
| LmjF32.1510 | <i>L. major</i> | 162 | 540  | 701  |
| LmjF32.1520 | <i>L. major</i> | 55  | 228  | 282  |
| LmjF32.1550 | <i>L. major</i> | 93  | 107  | 199  |
| LmjF32.1560 | <i>L. major</i> | 78  | 1    | 78   |
| LmjF32.1560 | <i>L. major</i> | 96  | 786  | 881  |
| LmjF32.1570 | <i>L. major</i> | 91  | 128  | 218  |
| LmjF32.1570 | <i>L. major</i> | 493 | 239  | 731  |
| LmjF32.1600 | <i>L. major</i> | 129 | 1    | 129  |
| LmjF32.1600 | <i>L. major</i> | 411 | 156  | 566  |
| LmjF32.1600 | <i>L. major</i> | 41  | 627  | 667  |
| LmjF32.1620 | <i>L. major</i> | 46  | 290  | 335  |
| LmjF32.1620 | <i>L. major</i> | 49  | 719  | 767  |
| LmjF32.1635 | <i>L. major</i> | 74  | 16   | 89   |
| LmjF32.1635 | <i>L. major</i> | 120 | 131  | 250  |

|             |                 |     |      |      |
|-------------|-----------------|-----|------|------|
| LmjF32.1640 | <i>L. major</i> | 83  | 140  | 222  |
| LmjF32.1650 | <i>L. major</i> | 212 | 1    | 212  |
| LmjF32.1650 | <i>L. major</i> | 144 | 234  | 377  |
| LmjF32.1650 | <i>L. major</i> | 42  | 458  | 499  |
| LmjF32.1650 | <i>L. major</i> | 49  | 664  | 712  |
| LmjF32.1660 | <i>L. major</i> | 436 | 1    | 436  |
| LmjF32.1660 | <i>L. major</i> | 120 | 445  | 564  |
| LmjF32.1660 | <i>L. major</i> | 333 | 590  | 922  |
| LmjF32.1660 | <i>L. major</i> | 51  | 945  | 995  |
| LmjF32.1660 | <i>L. major</i> | 76  | 1004 | 1079 |
| LmjF32.1660 | <i>L. major</i> | 41  | 1109 | 1149 |
| LmjF32.1690 | <i>L. major</i> | 42  | 1    | 42   |
| LmjF32.1690 | <i>L. major</i> | 170 | 394  | 563  |
| LmjF32.1700 | <i>L. major</i> | 52  | 213  | 264  |
| LmjF32.1700 | <i>L. major</i> | 65  | 289  | 353  |
| LmjF32.1700 | <i>L. major</i> | 127 | 383  | 509  |
| LmjF32.1710 | <i>L. major</i> | 78  | 92   | 169  |
| LmjF32.1710 | <i>L. major</i> | 80  | 298  | 377  |
| LmjF32.1710 | <i>L. major</i> | 48  | 381  | 428  |
| LmjF32.1710 | <i>L. major</i> | 43  | 629  | 671  |
| LmjF32.1720 | <i>L. major</i> | 61  | 189  | 249  |
| LmjF32.1720 | <i>L. major</i> | 134 | 537  | 670  |
| LmjF32.1740 | <i>L. major</i> | 63  | 67   | 129  |
| LmjF32.1750 | <i>L. major</i> | 63  | 371  | 433  |
| LmjF32.1750 | <i>L. major</i> | 57  | 573  | 629  |
| LmjF32.1750 | <i>L. major</i> | 63  | 718  | 780  |
| LmjF32.1760 | <i>L. major</i> | 46  | 101  | 146  |
| LmjF32.1760 | <i>L. major</i> | 76  | 199  | 274  |
| LmjF32.1760 | <i>L. major</i> | 121 | 337  | 457  |
| LmjF32.1770 | <i>L. major</i> | 43  | 30   | 72   |
| LmjF32.1770 | <i>L. major</i> | 43  | 349  | 391  |
| LmjF32.1770 | <i>L. major</i> | 45  | 452  | 496  |
| LmjF32.1790 | <i>L. major</i> | 58  | 278  | 335  |
| LmjF32.1790 | <i>L. major</i> | 50  | 605  | 654  |
| LmjF32.1790 | <i>L. major</i> | 50  | 605  | 654  |
| LmjF32.1800 | <i>L. major</i> | 243 | 1    | 243  |
| LmjF32.1802 | <i>L. major</i> | 67  | 41   | 107  |
| LmjF32.1810 | <i>L. major</i> | 95  | 28   | 122  |
| LmjF32.1850 | <i>L. major</i> | 54  | 541  | 594  |
| LmjF32.1860 | <i>L. major</i> | 42  | 200  | 241  |
| LmjF32.1860 | <i>L. major</i> | 60  | 256  | 315  |
| LmjF32.1870 | <i>L. major</i> | 48  | 175  | 222  |
| LmjF32.1870 | <i>L. major</i> | 249 | 377  | 625  |
| LmjF32.1875 | <i>L. major</i> | 77  | 1    | 77   |
| LmjF32.1880 | <i>L. major</i> | 97  | 1    | 97   |
| LmjF32.1880 | <i>L. major</i> | 224 | 126  | 349  |
| LmjF32.1880 | <i>L. major</i> | 105 | 377  | 481  |

|             |                 |     |     |     |
|-------------|-----------------|-----|-----|-----|
| LmjF32.1890 | <i>L. major</i> | 49  | 30  | 78  |
| LmjF32.1890 | <i>L. major</i> | 44  | 507 | 550 |
| LmjF32.1890 | <i>L. major</i> | 45  | 584 | 628 |
| LmjF32.1900 | <i>L. major</i> | 100 | 124 | 223 |
| LmjF32.1900 | <i>L. major</i> | 85  | 289 | 373 |
| LmjF32.1900 | <i>L. major</i> | 56  | 382 | 437 |
| LmjF32.1900 | <i>L. major</i> | 50  | 529 | 578 |
| LmjF32.1910 | <i>L. major</i> | 124 | 327 | 450 |
| LmjF32.1930 | <i>L. major</i> | 344 | 1   | 344 |
| LmjF32.1930 | <i>L. major</i> | 395 | 387 | 781 |
| LmjF32.1950 | <i>L. major</i> | 73  | 25  | 97  |
| LmjF32.1950 | <i>L. major</i> | 122 | 303 | 424 |
| LmjF32.1960 | <i>L. major</i> | 42  | 263 | 304 |
| LmjF32.1965 | <i>L. major</i> | 76  | 1   | 76  |
| LmjF32.1965 | <i>L. major</i> | 65  | 115 | 179 |
| LmjF32.1965 | <i>L. major</i> | 91  | 231 | 321 |
| LmjF32.1965 | <i>L. major</i> | 126 | 329 | 454 |
| LmjF32.1970 | <i>L. major</i> | 41  | 1   | 41  |
| LmjF32.1970 | <i>L. major</i> | 89  | 209 | 297 |
| LmjF32.1975 | <i>L. major</i> | 150 | 1   | 150 |
| LmjF32.1980 | <i>L. major</i> | 72  | 116 | 187 |
| LmjF32.1980 | <i>L. major</i> | 89  | 244 | 332 |
| LmjF32.1980 | <i>L. major</i> | 110 | 398 | 507 |
| LmjF32.1980 | <i>L. major</i> | 112 | 515 | 626 |
| LmjF32.1980 | <i>L. major</i> | 96  | 649 | 744 |
| LmjF32.1990 | <i>L. major</i> | 111 | 1   | 111 |
| LmjF32.2000 | <i>L. major</i> | 45  | 214 | 258 |
| LmjF32.2000 | <i>L. major</i> | 100 | 270 | 369 |
| LmjF32.2020 | <i>L. major</i> | 44  | 78  | 121 |
| LmjF32.2040 | <i>L. major</i> | 149 | 1   | 149 |
| LmjF32.2040 | <i>L. major</i> | 105 | 153 | 257 |
| LmjF32.2040 | <i>L. major</i> | 127 | 470 | 596 |
| LmjF32.2040 | <i>L. major</i> | 68  | 605 | 672 |
| LmjF32.2040 | <i>L. major</i> | 107 | 692 | 798 |
| LmjF32.2070 | <i>L. major</i> | 43  | 110 | 152 |
| LmjF32.2080 | <i>L. major</i> | 87  | 39  | 125 |
| LmjF32.2080 | <i>L. major</i> | 64  | 185 | 248 |
| LmjF32.2080 | <i>L. major</i> | 41  | 298 | 338 |
| LmjF32.2080 | <i>L. major</i> | 66  | 402 | 467 |
| LmjF32.2100 | <i>L. major</i> | 50  | 101 | 150 |
| LmjF32.2100 | <i>L. major</i> | 334 | 338 | 671 |
| LmjF32.2100 | <i>L. major</i> | 257 | 679 | 935 |
| LmjF32.2110 | <i>L. major</i> | 100 | 50  | 149 |
| LmjF32.2110 | <i>L. major</i> | 68  | 218 | 285 |
| LmjF32.2110 | <i>L. major</i> | 93  | 473 | 565 |
| LmjF32.2110 | <i>L. major</i> | 42  | 574 | 615 |
| LmjF32.2130 | <i>L. major</i> | 115 | 64  | 178 |

|             |                 |     |      |      |
|-------------|-----------------|-----|------|------|
| LmjF32.2130 | <i>L. major</i> | 166 | 239  | 404  |
| LmjF32.2155 | <i>L. major</i> | 123 | 16   | 138  |
| LmjF32.2155 | <i>L. major</i> | 57  | 181  | 237  |
| LmjF32.2155 | <i>L. major</i> | 75  | 339  | 413  |
| LmjF32.2155 | <i>L. major</i> | 46  | 989  | 1034 |
| LmjF32.2160 | <i>L. major</i> | 173 | 1133 | 1305 |
| LmjF32.2170 | <i>L. major</i> | 180 | 27   | 206  |
| LmjF32.2190 | <i>L. major</i> | 353 | 1    | 353  |
| LmjF32.2190 | <i>L. major</i> | 103 | 483  | 585  |
| LmjF32.2200 | <i>L. major</i> | 98  | 1    | 98   |
| LmjF32.2210 | <i>L. major</i> | 65  | 142  | 206  |
| LmjF32.2220 | <i>L. major</i> | 732 | 86   | 817  |
| LmjF32.2220 | <i>L. major</i> | 184 | 849  | 1032 |
| LmjF32.2220 | <i>L. major</i> | 58  | 1045 | 1102 |
| LmjF32.2220 | <i>L. major</i> | 55  | 1119 | 1173 |
| LmjF32.2220 | <i>L. major</i> | 122 | 1241 | 1362 |
| LmjF32.2230 | <i>L. major</i> | 202 | 1    | 202  |
| LmjF32.2230 | <i>L. major</i> | 62  | 430  | 491  |
| LmjF32.2240 | <i>L. major</i> | 44  | 7    | 50   |
| LmjF32.2240 | <i>L. major</i> | 75  | 109  | 183  |
| LmjF32.2240 | <i>L. major</i> | 113 | 313  | 425  |
| LmjF32.2240 | <i>L. major</i> | 48  | 491  | 538  |
| LmjF32.2240 | <i>L. major</i> | 166 | 737  | 902  |
| LmjF32.2250 | <i>L. major</i> | 71  | 1    | 71   |
| LmjF32.2250 | <i>L. major</i> | 80  | 157  | 236  |
| LmjF32.2250 | <i>L. major</i> | 43  | 271  | 313  |
| LmjF32.2260 | <i>L. major</i> | 74  | 114  | 187  |
| LmjF32.2270 | <i>L. major</i> | 45  | 1    | 45   |
| LmjF32.2270 | <i>L. major</i> | 509 | 213  | 721  |
| LmjF32.2270 | <i>L. major</i> | 164 | 724  | 887  |
| LmjF32.2280 | <i>L. major</i> | 55  | 230  | 284  |
| LmjF32.2290 | <i>L. major</i> | 140 | 1    | 140  |
| LmjF32.2290 | <i>L. major</i> | 42  | 527  | 568  |
| LmjF32.2300 | <i>L. major</i> | 143 | 17   | 159  |
| LmjF32.2300 | <i>L. major</i> | 81  | 195  | 275  |
| LmjF32.2300 | <i>L. major</i> | 175 | 279  | 453  |
| LmjF32.2310 | <i>L. major</i> | 116 | 150  | 265  |
| LmjF32.2310 | <i>L. major</i> | 41  | 586  | 626  |
| LmjF32.2310 | <i>L. major</i> | 63  | 693  | 755  |
| LmjF32.2310 | <i>L. major</i> | 46  | 867  | 912  |
| LmjF32.2310 | <i>L. major</i> | 167 | 950  | 1116 |
| LmjF32.2310 | <i>L. major</i> | 47  | 1149 | 1195 |
| LmjF32.2350 | <i>L. major</i> | 457 | 1    | 457  |
| LmjF32.2350 | <i>L. major</i> | 115 | 491  | 605  |
| LmjF32.2360 | <i>L. major</i> | 76  | 48   | 123  |
| LmjF32.2380 | <i>L. major</i> | 163 | 1    | 163  |
| LmjF32.2380 | <i>L. major</i> | 116 | 478  | 593  |

|             |                 |     |      |      |
|-------------|-----------------|-----|------|------|
| LmjF32.2390 | <i>L. major</i> | 93  | 77   | 169  |
| LmjF32.2390 | <i>L. major</i> | 294 | 195  | 488  |
| LmjF32.2410 | <i>L. major</i> | 57  | 1    | 57   |
| LmjF32.2410 | <i>L. major</i> | 62  | 167  | 228  |
| LmjF32.2410 | <i>L. major</i> | 82  | 311  | 392  |
| LmjF32.2410 | <i>L. major</i> | 81  | 467  | 547  |
| LmjF32.2410 | <i>L. major</i> | 296 | 553  | 848  |
| LmjF32.2410 | <i>L. major</i> | 82  | 870  | 951  |
| LmjF32.2410 | <i>L. major</i> | 999 | 995  | 1993 |
| LmjF32.2420 | <i>L. major</i> | 61  | 114  | 174  |
| LmjF32.2420 | <i>L. major</i> | 43  | 215  | 257  |
| LmjF32.2420 | <i>L. major</i> | 79  | 352  | 430  |
| LmjF32.2420 | <i>L. major</i> | 40  | 536  | 575  |
| LmjF32.2420 | <i>L. major</i> | 94  | 652  | 745  |
| LmjF32.2430 | <i>L. major</i> | 47  | 77   | 123  |
| LmjF32.2440 | <i>L. major</i> | 42  | 1    | 42   |
| LmjF32.2440 | <i>L. major</i> | 71  | 346  | 416  |
| LmjF32.2460 | <i>L. major</i> | 145 | 125  | 269  |
| LmjF32.2460 | <i>L. major</i> | 594 | 310  | 903  |
| LmjF32.2480 | <i>L. major</i> | 55  | 1    | 55   |
| LmjF32.2490 | <i>L. major</i> | 144 | 39   | 182  |
| LmjF32.2490 | <i>L. major</i> | 40  | 404  | 443  |
| LmjF32.2490 | <i>L. major</i> | 41  | 570  | 610  |
| LmjF32.2490 | <i>L. major</i> | 84  | 636  | 719  |
| LmjF32.2510 | <i>L. major</i> | 104 | 60   | 163  |
| LmjF32.2510 | <i>L. major</i> | 54  | 454  | 507  |
| LmjF32.2520 | <i>L. major</i> | 872 | 55   | 926  |
| LmjF32.2530 | <i>L. major</i> | 131 | 179  | 309  |
| LmjF32.2530 | <i>L. major</i> | 84  | 586  | 669  |
| LmjF32.2530 | <i>L. major</i> | 75  | 884  | 958  |
| LmjF32.2540 | <i>L. major</i> | 145 | 529  | 673  |
| LmjF32.2550 | <i>L. major</i> | 50  | 25   | 74   |
| LmjF32.2550 | <i>L. major</i> | 50  | 128  | 177  |
| LmjF32.2550 | <i>L. major</i> | 69  | 1392 | 1460 |
| LmjF32.2550 | <i>L. major</i> | 46  | 1493 | 1538 |
| LmjF32.2550 | <i>L. major</i> | 53  | 1558 | 1610 |
| LmjF32.2570 | <i>L. major</i> | 289 | 1    | 289  |
| LmjF32.2570 | <i>L. major</i> | 67  | 311  | 377  |
| LmjF32.2570 | <i>L. major</i> | 234 | 391  | 624  |
| LmjF32.2570 | <i>L. major</i> | 50  | 626  | 675  |
| LmjF32.2590 | <i>L. major</i> | 45  | 1    | 45   |
| LmjF32.2600 | <i>L. major</i> | 129 | 249  | 377  |
| LmjF32.2600 | <i>L. major</i> | 203 | 438  | 640  |
| LmjF32.2610 | <i>L. major</i> | 462 | 1    | 462  |
| LmjF32.2610 | <i>L. major</i> | 373 | 480  | 852  |
| LmjF32.2650 | <i>L. major</i> | 71  | 228  | 298  |
| LmjF32.2650 | <i>L. major</i> | 40  | 1819 | 1858 |

|             |                 |     |      |      |
|-------------|-----------------|-----|------|------|
| LmjF32.2660 | <i>L. major</i> | 71  | 1    | 71   |
| LmjF32.2670 | <i>L. major</i> | 131 | 1    | 131  |
| LmjF32.2670 | <i>L. major</i> | 112 | 188  | 299  |
| LmjF32.2670 | <i>L. major</i> | 59  | 419  | 477  |
| LmjF32.2670 | <i>L. major</i> | 64  | 517  | 580  |
| LmjF32.2670 | <i>L. major</i> | 70  | 600  | 669  |
| LmjF32.2670 | <i>L. major</i> | 50  | 741  | 790  |
| LmjF32.2700 | <i>L. major</i> | 72  | 213  | 284  |
| LmjF32.2700 | <i>L. major</i> | 67  | 587  | 653  |
| LmjF32.2700 | <i>L. major</i> | 72  | 1057 | 1128 |
| LmjF32.2730 | <i>L. major</i> | 119 | 269  | 387  |
| LmjF32.2730 | <i>L. major</i> | 44  | 448  | 491  |
| LmjF32.2730 | <i>L. major</i> | 53  | 612  | 664  |
| LmjF32.2750 | <i>L. major</i> | 200 | 1    | 200  |
| LmjF32.2750 | <i>L. major</i> | 165 | 471  | 635  |
| LmjF32.2750 | <i>L. major</i> | 77  | 891  | 967  |
| LmjF32.2750 | <i>L. major</i> | 147 | 1220 | 1366 |
| LmjF32.2760 | <i>L. major</i> | 313 | 1    | 313  |
| LmjF32.2760 | <i>L. major</i> | 83  | 381  | 463  |
| LmjF32.2760 | <i>L. major</i> | 235 | 481  | 715  |
| LmjF32.2760 | <i>L. major</i> | 127 | 719  | 845  |
| LmjF32.2770 | <i>L. major</i> | 52  | 1    | 52   |
| LmjF32.2770 | <i>L. major</i> | 808 | 153  | 960  |
| LmjF32.2780 | <i>L. major</i> | 40  | 314  | 353  |
| LmjF32.2780 | <i>L. major</i> | 91  | 465  | 555  |
| LmjF32.2780 | <i>L. major</i> | 117 | 978  | 1094 |
| LmjF32.2800 | <i>L. major</i> | 225 | 1    | 225  |
| LmjF32.2800 | <i>L. major</i> | 74  | 409  | 482  |
| LmjF32.2810 | <i>L. major</i> | 126 | 1    | 126  |
| LmjF32.2820 | <i>L. major</i> | 73  | 1    | 73   |
| LmjF32.2830 | <i>L. major</i> | 337 | 1    | 337  |
| LmjF32.2830 | <i>L. major</i> | 260 | 378  | 637  |
| LmjF32.2830 | <i>L. major</i> | 240 | 699  | 938  |
| LmjF32.2830 | <i>L. major</i> | 113 | 981  | 1093 |
| LmjF32.2840 | <i>L. major</i> | 389 | 110  | 498  |
| LmjF32.2850 | <i>L. major</i> | 184 | 95   | 278  |
| LmjF32.2850 | <i>L. major</i> | 59  | 500  | 558  |
| LmjF32.2860 | <i>L. major</i> | 96  | 118  | 213  |
| LmjF32.2860 | <i>L. major</i> | 87  | 218  | 304  |
| LmjF32.2860 | <i>L. major</i> | 156 | 317  | 472  |
| LmjF32.2870 | <i>L. major</i> | 46  | 185  | 230  |
| LmjF32.2880 | <i>L. major</i> | 135 | 1    | 135  |
| LmjF32.2880 | <i>L. major</i> | 228 | 202  | 429  |
| LmjF32.2880 | <i>L. major</i> | 63  | 472  | 534  |
| LmjF32.2885 | <i>L. major</i> | 121 | 132  | 252  |
| LmjF32.2890 | <i>L. major</i> | 57  | 39   | 95   |
| LmjF32.2900 | <i>L. major</i> | 155 | 161  | 315  |

|             |                 |     |      |      |
|-------------|-----------------|-----|------|------|
| LmjF32.2900 | <i>L. major</i> | 47  | 355  | 401  |
| LmjF32.2900 | <i>L. major</i> | 150 | 469  | 618  |
| LmjF32.2910 | <i>L. major</i> | 72  | 1    | 72   |
| LmjF32.2910 | <i>L. major</i> | 44  | 221  | 264  |
| LmjF32.2910 | <i>L. major</i> | 50  | 864  | 913  |
| LmjF32.2910 | <i>L. major</i> | 74  | 1061 | 1134 |
| LmjF32.2920 | <i>L. major</i> | 41  | 549  | 589  |
| LmjF32.2930 | <i>L. major</i> | 42  | 68   | 109  |
| LmjF32.2930 | <i>L. major</i> | 52  | 329  | 380  |
| LmjF32.2930 | <i>L. major</i> | 52  | 329  | 380  |
| LmjF32.2960 | <i>L. major</i> | 43  | 622  | 664  |
| LmjF32.2970 | <i>L. major</i> | 109 | 1    | 109  |
| LmjF32.2980 | <i>L. major</i> | 55  | 1    | 55   |
| LmjF32.2990 | <i>L. major</i> | 58  | 681  | 738  |
| LmjF32.3010 | <i>L. major</i> | 73  | 803  | 875  |
| LmjF32.3020 | <i>L. major</i> | 67  | 366  | 432  |
| LmjF32.3020 | <i>L. major</i> | 99  | 502  | 600  |
| LmjF32.3020 | <i>L. major</i> | 47  | 671  | 717  |
| LmjF32.3020 | <i>L. major</i> | 45  | 743  | 787  |
| LmjF32.3030 | <i>L. major</i> | 198 | 72   | 269  |
| LmjF32.3060 | <i>L. major</i> | 100 | 30   | 129  |
| LmjF32.3060 | <i>L. major</i> | 55  | 189  | 243  |
| LmjF32.3060 | <i>L. major</i> | 156 | 406  | 561  |
| LmjF32.3060 | <i>L. major</i> | 56  | 629  | 684  |
| LmjF32.3060 | <i>L. major</i> | 52  | 733  | 784  |
| LmjF32.3060 | <i>L. major</i> | 239 | 860  | 1098 |
| LmjF32.3070 | <i>L. major</i> | 94  | 160  | 253  |
| LmjF32.3080 | <i>L. major</i> | 72  | 1    | 72   |
| LmjF32.3090 | <i>L. major</i> | 273 | 1    | 273  |
| LmjF32.3090 | <i>L. major</i> | 415 | 281  | 695  |
| LmjF32.3090 | <i>L. major</i> | 56  | 728  | 783  |
| LmjF32.3090 | <i>L. major</i> | 45  | 813  | 857  |
| LmjF32.3090 | <i>L. major</i> | 132 | 911  | 1042 |
| LmjF32.3090 | <i>L. major</i> | 257 | 1256 | 1512 |
| LmjF32.3100 | <i>L. major</i> | 110 | 1    | 110  |
| LmjF32.3100 | <i>L. major</i> | 105 | 150  | 254  |
| LmjF32.3110 | <i>L. major</i> | 71  | 395  | 465  |
| LmjF32.3110 | <i>L. major</i> | 44  | 907  | 950  |
| LmjF32.3110 | <i>L. major</i> | 44  | 907  | 950  |
| LmjF32.3130 | <i>L. major</i> | 42  | 1    | 42   |
| LmjF32.3130 | <i>L. major</i> | 87  | 333  | 419  |
| LmjF32.3130 | <i>L. major</i> | 87  | 333  | 419  |
| LmjF32.3140 | <i>L. major</i> | 76  | 1    | 76   |
| LmjF32.3150 | <i>L. major</i> | 334 | 310  | 643  |
| LmjF32.3150 | <i>L. major</i> | 48  | 700  | 747  |
| LmjF32.3150 | <i>L. major</i> | 55  | 996  | 1050 |
| LmjF32.3150 | <i>L. major</i> | 428 | 1063 | 1490 |



|             |                 |     |      |      |
|-------------|-----------------|-----|------|------|
| LmjF32.3150 | <i>L. major</i> | 53  | 1530 | 1582 |
| LmjF32.3150 | <i>L. major</i> | 339 | 1645 | 1983 |
| LmjF32.3150 | <i>L. major</i> | 43  | 2054 | 2096 |
| LmjF32.3150 | <i>L. major</i> | 79  | 2106 | 2184 |
| LmjF32.3150 | <i>L. major</i> | 101 | 2199 | 2299 |
| LmjF32.3150 | <i>L. major</i> | 63  | 2375 | 2437 |
| LmjF32.3160 | <i>L. major</i> | 71  | 1    | 71   |
| LmjF32.3160 | <i>L. major</i> | 63  | 204  | 266  |
| LmjF32.3160 | <i>L. major</i> | 101 | 498  | 598  |
| LmjF32.3160 | <i>L. major</i> | 124 | 648  | 771  |
| LmjF32.3180 | <i>L. major</i> | 41  | 255  | 295  |
| LmjF32.3180 | <i>L. major</i> | 51  | 623  | 673  |
| LmjF32.3180 | <i>L. major</i> | 51  | 623  | 673  |
| LmjF32.3190 | <i>L. major</i> | 48  | 69   | 116  |
| LmjF32.3190 | <i>L. major</i> | 49  | 242  | 290  |
| LmjF32.3190 | <i>L. major</i> | 47  | 452  | 498  |
| LmjF32.3190 | <i>L. major</i> | 43  | 736  | 778  |
| LmjF32.3190 | <i>L. major</i> | 52  | 955  | 1006 |
| LmjF32.3200 | <i>L. major</i> | 74  | 1    | 74   |
| LmjF32.3200 | <i>L. major</i> | 80  | 136  | 215  |
| LmjF32.3200 | <i>L. major</i> | 108 | 247  | 354  |
| LmjF32.3200 | <i>L. major</i> | 142 | 446  | 587  |
| LmjF32.3200 | <i>L. major</i> | 40  | 705  | 744  |
| LmjF32.3200 | <i>L. major</i> | 49  | 830  | 878  |
| LmjF32.3200 | <i>L. major</i> | 74  | 1057 | 1130 |
| LmjF32.3200 | <i>L. major</i> | 53  | 1265 | 1317 |
| LmjF32.3220 | <i>L. major</i> | 220 | 1    | 220  |
| LmjF32.3220 | <i>L. major</i> | 82  | 248  | 329  |
| LmjF32.3220 | <i>L. major</i> | 80  | 407  | 486  |
| LmjF32.3220 | <i>L. major</i> | 45  | 527  | 571  |
| LmjF32.3230 | <i>L. major</i> | 66  | 1    | 66   |
| LmjF32.3230 | <i>L. major</i> | 43  | 333  | 375  |
| LmjF32.3230 | <i>L. major</i> | 40  | 386  | 425  |
| LmjF32.3240 | <i>L. major</i> | 72  | 197  | 268  |
| LmjF32.3240 | <i>L. major</i> | 64  | 425  | 488  |
| LmjF32.3240 | <i>L. major</i> | 99  | 492  | 590  |
| LmjF32.3250 | <i>L. major</i> | 137 | 289  | 425  |
| LmjF32.3250 | <i>L. major</i> | 674 | 433  | 1106 |
| LmjF32.3280 | <i>L. major</i> | 61  | 30   | 90   |
| LmjF32.3280 | <i>L. major</i> | 120 | 193  | 312  |
| LmjF32.3280 | <i>L. major</i> | 103 | 368  | 470  |
| LmjF32.3280 | <i>L. major</i> | 247 | 505  | 751  |
| LmjF32.3280 | <i>L. major</i> | 112 | 753  | 864  |
| LmjF32.3290 | <i>L. major</i> | 80  | 161  | 240  |
| LmjF32.3300 | <i>L. major</i> | 104 | 62   | 165  |
| LmjF32.3300 | <i>L. major</i> | 45  | 250  | 294  |
| LmjF32.3300 | <i>L. major</i> | 45  | 250  | 294  |

|             |                 |     |      |      |
|-------------|-----------------|-----|------|------|
| LmjF32.3330 | <i>L. major</i> | 51  | 64   | 114  |
| LmjF32.3340 | <i>L. major</i> | 45  | 140  | 184  |
| LmjF32.3340 | <i>L. major</i> | 51  | 857  | 907  |
| LmjF32.3340 | <i>L. major</i> | 45  | 1068 | 1112 |
| LmjF32.3350 | <i>L. major</i> | 66  | 235  | 300  |
| LmjF32.3350 | <i>L. major</i> | 51  | 315  | 365  |
| LmjF32.3350 | <i>L. major</i> | 365 | 397  | 761  |
| LmjF32.3350 | <i>L. major</i> | 63  | 825  | 887  |
| LmjF32.3350 | <i>L. major</i> | 95  | 1000 | 1094 |
| LmjF32.3350 | <i>L. major</i> | 49  | 1150 | 1198 |
| LmjF32.3360 | <i>L. major</i> | 47  | 369  | 415  |
| LmjF32.3380 | <i>L. major</i> | 75  | 75   | 149  |
| LmjF32.3380 | <i>L. major</i> | 51  | 173  | 223  |
| LmjF32.3380 | <i>L. major</i> | 68  | 528  | 595  |
| LmjF32.3390 | <i>L. major</i> | 67  | 1    | 67   |
| LmjF32.3390 | <i>L. major</i> | 50  | 551  | 600  |
| LmjF32.3390 | <i>L. major</i> | 50  | 551  | 600  |
| LmjF32.3410 | <i>L. major</i> | 136 | 1    | 136  |
| LmjF32.3410 | <i>L. major</i> | 60  | 1296 | 1355 |
| LmjF32.3410 | <i>L. major</i> | 117 | 1414 | 1530 |
| LmjF32.3410 | <i>L. major</i> | 72  | 1627 | 1698 |
| LmjF32.3410 | <i>L. major</i> | 43  | 2072 | 2114 |
| LmjF32.3430 | <i>L. major</i> | 79  | 1    | 79   |
| LmjF32.3430 | <i>L. major</i> | 76  | 114  | 189  |
| LmjF32.3430 | <i>L. major</i> | 386 | 254  | 639  |
| LmjF32.3430 | <i>L. major</i> | 141 | 667  | 807  |
| LmjF32.3440 | <i>L. major</i> | 83  | 181  | 263  |
| LmjF32.3450 | <i>L. major</i> | 314 | 143  | 456  |
| LmjF32.3450 | <i>L. major</i> | 78  | 481  | 558  |
| LmjF32.3470 | <i>L. major</i> | 79  | 119  | 197  |
| LmjF32.3470 | <i>L. major</i> | 102 | 351  | 452  |
| LmjF32.3480 | <i>L. major</i> | 43  | 1    | 43   |
| LmjF32.3480 | <i>L. major</i> | 96  | 79   | 174  |
| LmjF32.3480 | <i>L. major</i> | 48  | 321  | 368  |
| LmjF32.3490 | <i>L. major</i> | 74  | 1    | 74   |
| LmjF32.3490 | <i>L. major</i> | 100 | 490  | 589  |
| LmjF32.3490 | <i>L. major</i> | 100 | 490  | 589  |
| LmjF32.3500 | <i>L. major</i> | 84  | 39   | 122  |
| LmjF32.3500 | <i>L. major</i> | 81  | 424  | 504  |
| LmjF32.3500 | <i>L. major</i> | 81  | 424  | 504  |
| LmjF32.3502 | <i>L. major</i> | 84  | 39   | 122  |
| LmjF32.3502 | <i>L. major</i> | 81  | 424  | 504  |
| LmjF32.3502 | <i>L. major</i> | 81  | 424  | 504  |
| LmjF32.3504 | <i>L. major</i> | 84  | 39   | 122  |
| LmjF32.3504 | <i>L. major</i> | 81  | 424  | 504  |
| LmjF32.3504 | <i>L. major</i> | 81  | 424  | 504  |
| LmjF32.3506 | <i>L. major</i> | 84  | 39   | 122  |

|             |                 |     |     |     |
|-------------|-----------------|-----|-----|-----|
| LmjF32.3506 | <i>L. major</i> | 81  | 424 | 504 |
| LmjF32.3506 | <i>L. major</i> | 81  | 424 | 504 |
| LmjF32.3508 | <i>L. major</i> | 84  | 39  | 122 |
| LmjF32.3508 | <i>L. major</i> | 81  | 424 | 504 |
| LmjF32.3508 | <i>L. major</i> | 81  | 424 | 504 |
| LmjF32.3510 | <i>L. major</i> | 84  | 39  | 122 |
| LmjF32.3510 | <i>L. major</i> | 81  | 424 | 504 |
| LmjF32.3510 | <i>L. major</i> | 81  | 424 | 504 |
| LmjF32.3512 | <i>L. major</i> | 84  | 39  | 122 |
| LmjF32.3512 | <i>L. major</i> | 81  | 424 | 504 |
| LmjF32.3512 | <i>L. major</i> | 81  | 424 | 504 |
| LmjF32.3515 | <i>L. major</i> | 84  | 39  | 122 |
| LmjF32.3515 | <i>L. major</i> | 81  | 424 | 504 |
| LmjF32.3515 | <i>L. major</i> | 81  | 424 | 504 |
| LmjF32.3520 | <i>L. major</i> | 84  | 39  | 122 |
| LmjF32.3520 | <i>L. major</i> | 81  | 424 | 504 |
| LmjF32.3520 | <i>L. major</i> | 81  | 424 | 504 |
| LmjF32.3530 | <i>L. major</i> | 84  | 39  | 122 |
| LmjF32.3530 | <i>L. major</i> | 81  | 424 | 504 |
| LmjF32.3530 | <i>L. major</i> | 81  | 424 | 504 |
| LmjF32.3535 | <i>L. major</i> | 84  | 39  | 122 |
| LmjF32.3535 | <i>L. major</i> | 81  | 424 | 504 |
| LmjF32.3535 | <i>L. major</i> | 81  | 424 | 504 |
| LmjF32.3538 | <i>L. major</i> | 84  | 39  | 122 |
| LmjF32.3538 | <i>L. major</i> | 81  | 424 | 504 |
| LmjF32.3538 | <i>L. major</i> | 81  | 424 | 504 |
| LmjF32.3540 | <i>L. major</i> | 84  | 39  | 122 |
| LmjF32.3540 | <i>L. major</i> | 81  | 424 | 504 |
| LmjF32.3540 | <i>L. major</i> | 81  | 424 | 504 |
| LmjF32.3542 | <i>L. major</i> | 84  | 39  | 122 |
| LmjF32.3542 | <i>L. major</i> | 81  | 424 | 504 |
| LmjF32.3542 | <i>L. major</i> | 81  | 424 | 504 |
| LmjF32.3544 | <i>L. major</i> | 84  | 39  | 122 |
| LmjF32.3544 | <i>L. major</i> | 81  | 424 | 504 |
| LmjF32.3544 | <i>L. major</i> | 81  | 424 | 504 |
| LmjF32.3546 | <i>L. major</i> | 84  | 39  | 122 |
| LmjF32.3546 | <i>L. major</i> | 81  | 424 | 504 |
| LmjF32.3546 | <i>L. major</i> | 81  | 424 | 504 |
| LmjF32.3548 | <i>L. major</i> | 81  | 373 | 453 |
| LmjF32.3550 | <i>L. major</i> | 70  | 63  | 132 |
| LmjF32.3550 | <i>L. major</i> | 60  | 234 | 293 |
| LmjF32.3550 | <i>L. major</i> | 131 | 314 | 444 |
| LmjF32.3555 | <i>L. major</i> | 41  | 178 | 218 |
| LmjF32.3560 | <i>L. major</i> | 60  | 42  | 101 |
| LmjF32.3560 | <i>L. major</i> | 93  | 117 | 209 |
| LmjF32.3560 | <i>L. major</i> | 104 | 429 | 532 |
| LmjF32.3570 | <i>L. major</i> | 151 | 1   | 151 |

|             |                 |     |      |      |
|-------------|-----------------|-----|------|------|
| LmjF32.3570 | <i>L. major</i> | 123 | 262  | 384  |
| LmjF32.3570 | <i>L. major</i> | 67  | 691  | 757  |
| LmjF32.3570 | <i>L. major</i> | 65  | 1133 | 1197 |
| LmjF32.3600 | <i>L. major</i> | 76  | 1    | 76   |
| LmjF32.3600 | <i>L. major</i> | 48  | 142  | 189  |
| LmjF32.3600 | <i>L. major</i> | 48  | 142  | 189  |
| LmjF32.3620 | <i>L. major</i> | 106 | 1    | 106  |
| LmjF32.3630 | <i>L. major</i> | 202 | 1    | 202  |
| LmjF32.3630 | <i>L. major</i> | 53  | 265  | 317  |
| LmjF32.3640 | <i>L. major</i> | 74  | 364  | 437  |
| LmjF32.3690 | <i>L. major</i> | 843 | 1    | 843  |
| LmjF32.3690 | <i>L. major</i> | 87  | 848  | 934  |
| LmjF32.3700 | <i>L. major</i> | 52  | 35   | 86   |
| LmjF32.3700 | <i>L. major</i> | 65  | 288  | 352  |
| LmjF32.3700 | <i>L. major</i> | 88  | 550  | 637  |
| LmjF32.3700 | <i>L. major</i> | 67  | 661  | 727  |
| LmjF32.3710 | <i>L. major</i> | 48  | 1    | 48   |
| LmjF32.3710 | <i>L. major</i> | 44  | 92   | 135  |
| LmjF32.3750 | <i>L. major</i> | 56  | 53   | 108  |
| LmjF32.3760 | <i>L. major</i> | 44  | 273  | 316  |
| LmjF32.3760 | <i>L. major</i> | 55  | 554  | 608  |
| LmjF32.3760 | <i>L. major</i> | 55  | 554  | 608  |
| LmjF32.3770 | <i>L. major</i> | 94  | 39   | 132  |
| LmjF32.3780 | <i>L. major</i> | 42  | 23   | 64   |
| LmjF32.3780 | <i>L. major</i> | 44  | 93   | 136  |
| LmjF32.3780 | <i>L. major</i> | 44  | 93   | 136  |
| LmjF32.3800 | <i>L. major</i> | 57  | 29   | 85   |
| LmjF32.3810 | <i>L. major</i> | 43  | 111  | 153  |
| LmjF32.3810 | <i>L. major</i> | 81  | 306  | 386  |
| LmjF32.3810 | <i>L. major</i> | 81  | 306  | 386  |
| LmjF32.3850 | <i>L. major</i> | 108 | 1    | 108  |
| LmjF32.3850 | <i>L. major</i> | 52  | 125  | 176  |
| LmjF32.3850 | <i>L. major</i> | 49  | 223  | 271  |
| LmjF32.3860 | <i>L. major</i> | 41  | 577  | 617  |
| LmjF32.3860 | <i>L. major</i> | 43  | 716  | 758  |
| LmjF32.3860 | <i>L. major</i> | 71  | 792  | 862  |
| LmjF32.3870 | <i>L. major</i> | 43  | 593  | 635  |
| LmjF32.3870 | <i>L. major</i> | 47  | 762  | 808  |
| LmjF32.3870 | <i>L. major</i> | 47  | 762  | 808  |
| LmjF32.3890 | <i>L. major</i> | 55  | 334  | 388  |
| LmjF32.3900 | <i>L. major</i> | 63  | 198  | 260  |
| LmjF32.3920 | <i>L. major</i> | 87  | 680  | 766  |
| LmjF32.3930 | <i>L. major</i> | 63  | 1    | 63   |
| LmjF32.3930 | <i>L. major</i> | 51  | 99   | 149  |
| LmjF32.3930 | <i>L. major</i> | 50  | 1263 | 1312 |
| LmjF32.3950 | <i>L. major</i> | 94  | 815  | 908  |
| LmjF32.3960 | <i>L. major</i> | 48  | 138  | 185  |

|             |                 |     |      |      |
|-------------|-----------------|-----|------|------|
| LmjF32.3970 | <i>L. major</i> | 48  | 91   | 138  |
| LmjF32.3980 | <i>L. major</i> | 56  | 124  | 179  |
| LmjF32.3990 | <i>L. major</i> | 112 | 45   | 156  |
| LmjF33.0010 | <i>L. major</i> | 41  | 144  | 184  |
| LmjF33.0010 | <i>L. major</i> | 64  | 487  | 550  |
| LmjF33.0010 | <i>L. major</i> | 43  | 690  | 732  |
| LmjF33.0010 | <i>L. major</i> | 55  | 768  | 822  |
| LmjF33.0040 | <i>L. major</i> | 131 | 247  | 377  |
| LmjF33.0050 | <i>L. major</i> | 73  | 143  | 215  |
| LmjF33.0060 | <i>L. major</i> | 94  | 1    | 94   |
| LmjF33.0070 | <i>L. major</i> | 83  | 176  | 258  |
| LmjF33.0070 | <i>L. major</i> | 81  | 342  | 422  |
| LmjF33.0080 | <i>L. major</i> | 82  | 102  | 183  |
| LmjF33.0090 | <i>L. major</i> | 42  | 515  | 556  |
| LmjF33.0110 | <i>L. major</i> | 65  | 1    | 65   |
| LmjF33.0110 | <i>L. major</i> | 52  | 113  | 164  |
| LmjF33.0110 | <i>L. major</i> | 55  | 298  | 352  |
| LmjF33.0115 | <i>L. major</i> | 118 | 1    | 118  |
| LmjF33.0115 | <i>L. major</i> | 75  | 209  | 283  |
| LmjF33.0120 | <i>L. major</i> | 97  | 219  | 315  |
| LmjF33.0140 | <i>L. major</i> | 44  | 365  | 408  |
| LmjF33.0150 | <i>L. major</i> | 44  | 16   | 59   |
| LmjF33.0150 | <i>L. major</i> | 78  | 202  | 279  |
| LmjF33.0160 | <i>L. major</i> | 44  | 167  | 210  |
| LmjF33.0160 | <i>L. major</i> | 40  | 299  | 338  |
| LmjF33.0180 | <i>L. major</i> | 43  | 120  | 162  |
| LmjF33.0190 | <i>L. major</i> | 46  | 442  | 487  |
| LmjF33.0200 | <i>L. major</i> | 51  | 1    | 51   |
| LmjF33.0200 | <i>L. major</i> | 72  | 482  | 553  |
| LmjF33.0200 | <i>L. major</i> | 82  | 807  | 888  |
| LmjF33.0200 | <i>L. major</i> | 63  | 1109 | 1171 |
| LmjF33.0200 | <i>L. major</i> | 94  | 1263 | 1356 |
| LmjF33.0200 | <i>L. major</i> | 122 | 1363 | 1484 |
| LmjF33.0210 | <i>L. major</i> | 206 | 79   | 284  |
| LmjF33.0210 | <i>L. major</i> | 117 | 465  | 581  |
| LmjF33.0210 | <i>L. major</i> | 40  | 786  | 825  |
| LmjF33.0210 | <i>L. major</i> | 44  | 870  | 913  |
| LmjF33.0220 | <i>L. major</i> | 118 | 1    | 118  |
| LmjF33.0230 | <i>L. major</i> | 76  | 143  | 218  |
| LmjF33.0230 | <i>L. major</i> | 63  | 496  | 558  |
| LmjF33.0230 | <i>L. major</i> | 63  | 496  | 558  |
| LmjF33.0250 | <i>L. major</i> | 73  | 30   | 102  |
| LmjF33.0260 | <i>L. major</i> | 198 | 19   | 216  |
| LmjF33.0260 | <i>L. major</i> | 54  | 298  | 351  |
| LmjF33.0270 | <i>L. major</i> | 43  | 69   | 111  |
| LmjF33.0280 | <i>L. major</i> | 42  | 165  | 206  |
| LmjF33.0280 | <i>L. major</i> | 54  | 299  | 352  |

|             |                 |     |     |     |
|-------------|-----------------|-----|-----|-----|
| LmjF33.0280 | <i>L. major</i> | 54  | 299 | 352 |
| LmjF33.0290 | <i>L. major</i> | 67  | 1   | 67  |
| LmjF33.0295 | <i>L. major</i> | 63  | 77  | 139 |
| LmjF33.0310 | <i>L. major</i> | 59  | 1   | 59  |
| LmjF33.0310 | <i>L. major</i> | 60  | 131 | 190 |
| LmjF33.0310 | <i>L. major</i> | 74  | 594 | 667 |
| LmjF33.0312 | <i>L. major</i> | 102 | 176 | 277 |
| LmjF33.0312 | <i>L. major</i> | 53  | 505 | 557 |
| LmjF33.0314 | <i>L. major</i> | 102 | 176 | 277 |
| LmjF33.0314 | <i>L. major</i> | 53  | 505 | 557 |
| LmjF33.0316 | <i>L. major</i> | 102 | 176 | 277 |
| LmjF33.0316 | <i>L. major</i> | 53  | 505 | 557 |
| LmjF33.0318 | <i>L. major</i> | 102 | 176 | 277 |
| LmjF33.0318 | <i>L. major</i> | 53  | 505 | 557 |
| LmjF33.0320 | <i>L. major</i> | 102 | 176 | 277 |
| LmjF33.0320 | <i>L. major</i> | 53  | 505 | 557 |
| LmjF33.0323 | <i>L. major</i> | 102 | 176 | 277 |
| LmjF33.0323 | <i>L. major</i> | 53  | 505 | 557 |
| LmjF33.0326 | <i>L. major</i> | 102 | 176 | 277 |
| LmjF33.0326 | <i>L. major</i> | 53  | 505 | 557 |
| LmjF33.0330 | <i>L. major</i> | 102 | 176 | 277 |
| LmjF33.0330 | <i>L. major</i> | 53  | 505 | 557 |
| LmjF33.0333 | <i>L. major</i> | 102 | 176 | 277 |
| LmjF33.0333 | <i>L. major</i> | 53  | 505 | 557 |
| LmjF33.0336 | <i>L. major</i> | 102 | 176 | 277 |
| LmjF33.0336 | <i>L. major</i> | 53  | 505 | 557 |
| LmjF33.0340 | <i>L. major</i> | 102 | 176 | 277 |
| LmjF33.0340 | <i>L. major</i> | 53  | 505 | 557 |
| LmjF33.0343 | <i>L. major</i> | 102 | 176 | 277 |
| LmjF33.0343 | <i>L. major</i> | 53  | 505 | 557 |
| LmjF33.0346 | <i>L. major</i> | 102 | 176 | 277 |
| LmjF33.0346 | <i>L. major</i> | 53  | 505 | 557 |
| LmjF33.0350 | <i>L. major</i> | 102 | 176 | 277 |
| LmjF33.0350 | <i>L. major</i> | 53  | 505 | 557 |
| LmjF33.0355 | <i>L. major</i> | 102 | 176 | 277 |
| LmjF33.0355 | <i>L. major</i> | 53  | 505 | 557 |
| LmjF33.0360 | <i>L. major</i> | 102 | 176 | 277 |
| LmjF33.0360 | <i>L. major</i> | 53  | 505 | 557 |
| LmjF33.0365 | <i>L. major</i> | 102 | 176 | 277 |
| LmjF33.0365 | <i>L. major</i> | 53  | 505 | 557 |
| LmjF33.0370 | <i>L. major</i> | 191 | 1   | 191 |
| LmjF33.0370 | <i>L. major</i> | 153 | 203 | 355 |
| LmjF33.0390 | <i>L. major</i> | 186 | 67  | 252 |
| LmjF33.0400 | <i>L. major</i> | 44  | 1   | 44  |
| LmjF33.0410 | <i>L. major</i> | 46  | 529 | 574 |
| LmjF33.0430 | <i>L. major</i> | 57  | 32  | 88  |
| LmjF33.0430 | <i>L. major</i> | 58  | 196 | 253 |

|             |                 |     |      |      |
|-------------|-----------------|-----|------|------|
| LmjF33.0430 | <i>L. major</i> | 48  | 414  | 461  |
| LmjF33.0430 | <i>L. major</i> | 69  | 561  | 629  |
| LmjF33.0430 | <i>L. major</i> | 68  | 676  | 743  |
| LmjF33.0440 | <i>L. major</i> | 43  | 108  | 150  |
| LmjF33.0450 | <i>L. major</i> | 69  | 87   | 155  |
| LmjF33.0460 | <i>L. major</i> | 125 | 96   | 220  |
| LmjF33.0480 | <i>L. major</i> | 218 | 30   | 247  |
| LmjF33.0480 | <i>L. major</i> | 136 | 275  | 410  |
| LmjF33.0480 | <i>L. major</i> | 47  | 480  | 526  |
| LmjF33.0480 | <i>L. major</i> | 72  | 565  | 636  |
| LmjF33.0490 | <i>L. major</i> | 119 | 42   | 160  |
| LmjF33.0490 | <i>L. major</i> | 109 | 165  | 273  |
| LmjF33.0490 | <i>L. major</i> | 129 | 580  | 708  |
| LmjF33.0490 | <i>L. major</i> | 57  | 716  | 772  |
| LmjF33.0490 | <i>L. major</i> | 61  | 808  | 868  |
| LmjF33.0510 | <i>L. major</i> | 72  | 286  | 357  |
| LmjF33.0510 | <i>L. major</i> | 52  | 395  | 446  |
| LmjF33.0510 | <i>L. major</i> | 77  | 615  | 691  |
| LmjF33.0530 | <i>L. major</i> | 163 | 1    | 163  |
| LmjF33.0530 | <i>L. major</i> | 69  | 219  | 287  |
| LmjF33.0530 | <i>L. major</i> | 134 | 451  | 584  |
| LmjF33.0530 | <i>L. major</i> | 83  | 650  | 732  |
| LmjF33.0540 | <i>L. major</i> | 75  | 134  | 208  |
| LmjF33.0540 | <i>L. major</i> | 93  | 334  | 426  |
| LmjF33.0540 | <i>L. major</i> | 93  | 334  | 426  |
| LmjF33.0550 | <i>L. major</i> | 77  | 58   | 134  |
| LmjF33.0550 | <i>L. major</i> | 43  | 403  | 445  |
| LmjF33.0550 | <i>L. major</i> | 52  | 1312 | 1363 |
| LmjF33.0550 | <i>L. major</i> | 40  | 1405 | 1444 |
| LmjF33.0550 | <i>L. major</i> | 40  | 1455 | 1494 |
| LmjF33.0550 | <i>L. major</i> | 85  | 1876 | 1960 |
| LmjF33.0565 | <i>L. major</i> | 66  | 79   | 144  |
| LmjF33.0570 | <i>L. major</i> | 52  | 88   | 139  |
| LmjF33.0570 | <i>L. major</i> | 58  | 525  | 582  |
| LmjF33.0580 | <i>L. major</i> | 291 | 30   | 320  |
| LmjF33.0580 | <i>L. major</i> | 59  | 322  | 380  |
| LmjF33.0585 | <i>L. major</i> | 78  | 25   | 102  |
| LmjF33.0585 | <i>L. major</i> | 40  | 123  | 162  |
| LmjF33.0585 | <i>L. major</i> | 101 | 191  | 291  |
| LmjF33.0585 | <i>L. major</i> | 314 | 304  | 617  |
| LmjF33.0590 | <i>L. major</i> | 67  | 1    | 67   |
| LmjF33.0590 | <i>L. major</i> | 189 | 76   | 264  |
| LmjF33.0590 | <i>L. major</i> | 162 | 313  | 474  |
| LmjF33.0590 | <i>L. major</i> | 94  | 552  | 645  |
| LmjF33.0590 | <i>L. major</i> | 188 | 657  | 844  |
| LmjF33.0620 | <i>L. major</i> | 63  | 57   | 119  |
| LmjF33.0620 | <i>L. major</i> | 86  | 153  | 238  |

|             |                 |     |      |      |
|-------------|-----------------|-----|------|------|
| LmjF33.0620 | <i>L. major</i> | 86  | 153  | 238  |
| LmjF33.0630 | <i>L. major</i> | 93  | 31   | 123  |
| LmjF33.0650 | <i>L. major</i> | 243 | 1    | 243  |
| LmjF33.0650 | <i>L. major</i> | 77  | 379  | 455  |
| LmjF33.0650 | <i>L. major</i> | 569 | 460  | 1028 |
| LmjF33.0650 | <i>L. major</i> | 80  | 1044 | 1123 |
| LmjF33.0650 | <i>L. major</i> | 277 | 1125 | 1401 |
| LmjF33.0670 | <i>L. major</i> | 223 | 104  | 326  |
| LmjF33.0670 | <i>L. major</i> | 48  | 336  | 383  |
| LmjF33.0670 | <i>L. major</i> | 47  | 418  | 464  |
| LmjF33.0670 | <i>L. major</i> | 48  | 812  | 859  |
| LmjF33.0700 | <i>L. major</i> | 73  | 189  | 261  |
| LmjF33.0710 | <i>L. major</i> | 46  | 162  | 207  |
| LmjF33.0710 | <i>L. major</i> | 41  | 362  | 402  |
| LmjF33.0710 | <i>L. major</i> | 41  | 362  | 402  |
| LmjF33.0720 | <i>L. major</i> | 70  | 93   | 162  |
| LmjF33.0730 | <i>L. major</i> | 128 | 1    | 128  |
| LmjF33.0740 | <i>L. major</i> | 75  | 180  | 254  |
| LmjF33.0740 | <i>L. major</i> | 53  | 272  | 324  |
| LmjF33.0740 | <i>L. major</i> | 53  | 272  | 324  |
| LmjF33.0750 | <i>L. major</i> | 44  | 28   | 71   |
| LmjF33.0750 | <i>L. major</i> | 165 | 147  | 311  |
| LmjF33.0750 | <i>L. major</i> | 51  | 491  | 541  |
| LmjF33.0750 | <i>L. major</i> | 91  | 657  | 747  |
| LmjF33.0760 | <i>L. major</i> | 141 | 1    | 141  |
| LmjF33.0760 | <i>L. major</i> | 80  | 152  | 231  |
| LmjF33.0760 | <i>L. major</i> | 76  | 252  | 327  |
| LmjF33.0765 | <i>L. major</i> | 420 | 1    | 420  |
| LmjF33.0770 | <i>L. major</i> | 52  | 76   | 127  |
| LmjF33.0770 | <i>L. major</i> | 46  | 136  | 181  |
| LmjF33.0770 | <i>L. major</i> | 299 | 322  | 620  |
| LmjF33.0770 | <i>L. major</i> | 254 | 629  | 882  |
| LmjF33.0780 | <i>L. major</i> | 677 | 1    | 677  |
| LmjF33.0780 | <i>L. major</i> | 86  | 731  | 816  |
| LmjF33.0780 | <i>L. major</i> | 135 | 932  | 1066 |
| LmjF33.0780 | <i>L. major</i> | 173 | 1098 | 1270 |
| LmjF33.0790 | <i>L. major</i> | 99  | 216  | 314  |
| LmjF33.0790 | <i>L. major</i> | 45  | 465  | 509  |
| LmjF33.0790 | <i>L. major</i> | 71  | 682  | 752  |
| LmjF33.0790 | <i>L. major</i> | 125 | 1049 | 1173 |
| LmjF33.0790 | <i>L. major</i> | 45  | 1191 | 1235 |
| LmjF33.0790 | <i>L. major</i> | 62  | 1520 | 1581 |
| LmjF33.0792 | <i>L. major</i> | 40  | 404  | 443  |
| LmjF33.0794 | <i>L. major</i> | 40  | 404  | 443  |
| LmjF33.0796 | <i>L. major</i> | 40  | 404  | 443  |
| LmjF33.0798 | <i>L. major</i> | 40  | 404  | 443  |
| LmjF33.0800 | <i>L. major</i> | 40  | 404  | 443  |



|             |                 |     |      |      |
|-------------|-----------------|-----|------|------|
| LmjF33.0802 | <i>L. major</i> | 40  | 404  | 443  |
| LmjF33.0804 | <i>L. major</i> | 40  | 404  | 443  |
| LmjF33.0806 | <i>L. major</i> | 40  | 404  | 443  |
| LmjF33.0808 | <i>L. major</i> | 40  | 404  | 443  |
| LmjF33.0810 | <i>L. major</i> | 40  | 404  | 443  |
| LmjF33.0812 | <i>L. major</i> | 40  | 404  | 443  |
| LmjF33.0814 | <i>L. major</i> | 40  | 404  | 443  |
| LmjF33.0816 | <i>L. major</i> | 40  | 404  | 443  |
| LmjF33.0818 | <i>L. major</i> | 40  | 404  | 443  |
| LmjF33.0819 | <i>L. major</i> | 40  | 404  | 443  |
| LmjF33.0820 | <i>L. major</i> | 40  | 404  | 443  |
| LmjF33.0840 | <i>L. major</i> | 205 | 1    | 205  |
| LmjF33.0840 | <i>L. major</i> | 70  | 239  | 308  |
| LmjF33.0840 | <i>L. major</i> | 197 | 513  | 709  |
| LmjF33.0850 | <i>L. major</i> | 59  | 69   | 127  |
| LmjF33.0850 | <i>L. major</i> | 60  | 314  | 373  |
| LmjF33.0850 | <i>L. major</i> | 156 | 419  | 574  |
| LmjF33.0850 | <i>L. major</i> | 88  | 713  | 800  |
| LmjF33.0850 | <i>L. major</i> | 48  | 829  | 876  |
| LmjF33.0860 | <i>L. major</i> | 56  | 115  | 170  |
| LmjF33.0860 | <i>L. major</i> | 54  | 398  | 451  |
| LmjF33.0860 | <i>L. major</i> | 54  | 398  | 451  |
| LmjF33.0870 | <i>L. major</i> | 197 | 1    | 197  |
| LmjF33.0870 | <i>L. major</i> | 72  | 273  | 344  |
| LmjF33.0880 | <i>L. major</i> | 47  | 50   | 96   |
| LmjF33.0880 | <i>L. major</i> | 60  | 115  | 174  |
| LmjF33.0880 | <i>L. major</i> | 60  | 115  | 174  |
| LmjF33.0900 | <i>L. major</i> | 93  | 316  | 408  |
| LmjF33.0900 | <i>L. major</i> | 86  | 495  | 580  |
| LmjF33.0930 | <i>L. major</i> | 57  | 1    | 57   |
| LmjF33.0930 | <i>L. major</i> | 50  | 122  | 171  |
| LmjF33.0930 | <i>L. major</i> | 64  | 194  | 257  |
| LmjF33.0930 | <i>L. major</i> | 240 | 290  | 529  |
| LmjF33.0930 | <i>L. major</i> | 81  | 701  | 781  |
| LmjF33.0930 | <i>L. major</i> | 81  | 921  | 1001 |
| LmjF33.0935 | <i>L. major</i> | 108 | 1    | 108  |
| LmjF33.0935 | <i>L. major</i> | 47  | 165  | 211  |
| LmjF33.0935 | <i>L. major</i> | 336 | 213  | 548  |
| LmjF33.0940 | <i>L. major</i> | 304 | 36   | 339  |
| LmjF33.0940 | <i>L. major</i> | 42  | 448  | 489  |
| LmjF33.0940 | <i>L. major</i> | 101 | 666  | 766  |
| LmjF33.0940 | <i>L. major</i> | 163 | 827  | 989  |
| LmjF33.0940 | <i>L. major</i> | 84  | 1020 | 1103 |
| LmjF33.0950 | <i>L. major</i> | 117 | 1    | 117  |
| LmjF33.0950 | <i>L. major</i> | 124 | 296  | 419  |
| LmjF33.0950 | <i>L. major</i> | 53  | 787  | 839  |
| LmjF33.0950 | <i>L. major</i> | 54  | 984  | 1037 |

|             |                 |     |      |      |
|-------------|-----------------|-----|------|------|
| LmjF33.0950 | <i>L. major</i> | 41  | 1227 | 1267 |
| LmjF33.0950 | <i>L. major</i> | 201 | 1365 | 1565 |
| LmjF33.0970 | <i>L. major</i> | 75  | 120  | 194  |
| LmjF33.0970 | <i>L. major</i> | 183 | 371  | 553  |
| LmjF33.1000 | <i>L. major</i> | 167 | 187  | 353  |
| LmjF33.1000 | <i>L. major</i> | 66  | 397  | 462  |
| LmjF33.1000 | <i>L. major</i> | 50  | 487  | 536  |
| LmjF33.1000 | <i>L. major</i> | 51  | 582  | 632  |
| LmjF33.1000 | <i>L. major</i> | 244 | 684  | 927  |
| LmjF33.1010 | <i>L. major</i> | 50  | 441  | 490  |
| LmjF33.1010 | <i>L. major</i> | 43  | 531  | 573  |
| LmjF33.1010 | <i>L. major</i> | 49  | 727  | 775  |
| LmjF33.1020 | <i>L. major</i> | 464 | 1    | 464  |
| LmjF33.1020 | <i>L. major</i> | 128 | 473  | 600  |
| LmjF33.1020 | <i>L. major</i> | 72  | 745  | 816  |
| LmjF33.1030 | <i>L. major</i> | 46  | 1    | 46   |
| LmjF33.1035 | <i>L. major</i> | 123 | 1    | 123  |
| LmjF33.1040 | <i>L. major</i> | 41  | 17   | 57   |
| LmjF33.1040 | <i>L. major</i> | 130 | 86   | 215  |
| LmjF33.1040 | <i>L. major</i> | 57  | 394  | 450  |
| LmjF33.1050 | <i>L. major</i> | 49  | 90   | 138  |
| LmjF33.1060 | <i>L. major</i> | 46  | 404  | 449  |
| LmjF33.1060 | <i>L. major</i> | 83  | 875  | 957  |
| LmjF33.1080 | <i>L. major</i> | 58  | 24   | 81   |
| LmjF33.1080 | <i>L. major</i> | 64  | 92   | 155  |
| LmjF33.1080 | <i>L. major</i> | 41  | 324  | 364  |
| LmjF33.1080 | <i>L. major</i> | 48  | 398  | 445  |
| LmjF33.1100 | <i>L. major</i> | 46  | 1    | 46   |
| LmjF33.1100 | <i>L. major</i> | 105 | 111  | 215  |
| LmjF33.1100 | <i>L. major</i> | 148 | 256  | 403  |
| LmjF33.1100 | <i>L. major</i> | 89  | 506  | 594  |
| LmjF33.1100 | <i>L. major</i> | 264 | 641  | 904  |
| LmjF33.1110 | <i>L. major</i> | 62  | 96   | 157  |
| LmjF33.1110 | <i>L. major</i> | 150 | 304  | 453  |
| LmjF33.1110 | <i>L. major</i> | 272 | 487  | 758  |
| LmjF33.1120 | <i>L. major</i> | 235 | 1    | 235  |
| LmjF33.1120 | <i>L. major</i> | 69  | 265  | 333  |
| LmjF33.1130 | <i>L. major</i> | 53  | 562  | 614  |
| LmjF33.1150 | <i>L. major</i> | 73  | 1    | 73   |
| LmjF33.1150 | <i>L. major</i> | 92  | 78   | 169  |
| LmjF33.1150 | <i>L. major</i> | 78  | 185  | 262  |
| LmjF33.1150 | <i>L. major</i> | 111 | 278  | 388  |
| LmjF33.1150 | <i>L. major</i> | 56  | 795  | 850  |
| LmjF33.1160 | <i>L. major</i> | 49  | 1    | 49   |
| LmjF33.1170 | <i>L. major</i> | 186 | 39   | 224  |
| LmjF33.1170 | <i>L. major</i> | 60  | 239  | 298  |
| LmjF33.1170 | <i>L. major</i> | 121 | 339  | 459  |

|             |                 |     |      |      |
|-------------|-----------------|-----|------|------|
| LmjF33.1170 | <i>L. major</i> | 51  | 498  | 548  |
| LmjF33.1170 | <i>L. major</i> | 62  | 800  | 861  |
| LmjF33.1170 | <i>L. major</i> | 89  | 1170 | 1258 |
| LmjF33.1180 | <i>L. major</i> | 48  | 23   | 70   |
| LmjF33.1180 | <i>L. major</i> | 105 | 143  | 247  |
| LmjF33.1180 | <i>L. major</i> | 105 | 143  | 247  |
| LmjF33.1190 | <i>L. major</i> | 62  | 466  | 527  |
| LmjF33.1190 | <i>L. major</i> | 41  | 537  | 577  |
| LmjF33.1200 | <i>L. major</i> | 42  | 143  | 184  |
| LmjF33.1200 | <i>L. major</i> | 90  | 418  | 507  |
| LmjF33.1210 | <i>L. major</i> | 94  | 193  | 286  |
| LmjF33.1220 | <i>L. major</i> | 58  | 1    | 58   |
| LmjF33.1220 | <i>L. major</i> | 209 | 253  | 461  |
| LmjF33.1220 | <i>L. major</i> | 94  | 484  | 577  |
| LmjF33.1220 | <i>L. major</i> | 68  | 624  | 691  |
| LmjF33.1230 | <i>L. major</i> | 221 | 401  | 621  |
| LmjF33.1240 | <i>L. major</i> | 50  | 65   | 114  |
| LmjF33.1240 | <i>L. major</i> | 100 | 385  | 484  |
| LmjF33.1240 | <i>L. major</i> | 225 | 532  | 756  |
| LmjF33.1240 | <i>L. major</i> | 75  | 782  | 856  |
| LmjF33.1245 | <i>L. major</i> | 266 | 1    | 266  |
| LmjF33.1245 | <i>L. major</i> | 59  | 306  | 364  |
| LmjF33.1260 | <i>L. major</i> | 56  | 78   | 133  |
| LmjF33.1260 | <i>L. major</i> | 156 | 214  | 369  |
| LmjF33.1260 | <i>L. major</i> | 175 | 377  | 551  |
| LmjF33.1260 | <i>L. major</i> | 409 | 570  | 978  |
| LmjF33.1270 | <i>L. major</i> | 55  | 250  | 304  |
| LmjF33.1280 | <i>L. major</i> | 48  | 15   | 62   |
| LmjF33.1290 | <i>L. major</i> | 79  | 513  | 591  |
| LmjF33.1305 | <i>L. major</i> | 163 | 1    | 163  |
| LmjF33.1320 | <i>L. major</i> | 93  | 1    | 93   |
| LmjF33.1340 | <i>L. major</i> | 67  | 1    | 67   |
| LmjF33.1340 | <i>L. major</i> | 76  | 139  | 214  |
| LmjF33.1340 | <i>L. major</i> | 76  | 139  | 214  |
| LmjF33.1355 | <i>L. major</i> | 59  | 104  | 162  |
| LmjF33.1360 | <i>L. major</i> | 44  | 79   | 122  |
| LmjF33.1360 | <i>L. major</i> | 79  | 171  | 249  |
| LmjF33.1360 | <i>L. major</i> | 52  | 387  | 438  |
| LmjF33.1370 | <i>L. major</i> | 342 | 84   | 425  |
| LmjF33.1380 | <i>L. major</i> | 40  | 244  | 283  |
| LmjF33.1380 | <i>L. major</i> | 62  | 347  | 408  |
| LmjF33.1390 | <i>L. major</i> | 113 | 48   | 160  |
| LmjF33.1400 | <i>L. major</i> | 101 | 91   | 191  |
| LmjF33.1400 | <i>L. major</i> | 101 | 230  | 330  |
| LmjF33.1400 | <i>L. major</i> | 233 | 359  | 591  |
| LmjF33.1400 | <i>L. major</i> | 91  | 715  | 805  |
| LmjF33.1400 | <i>L. major</i> | 119 | 911  | 1029 |

|             |                 |     |      |      |
|-------------|-----------------|-----|------|------|
| LmjF33.1400 | <i>L. major</i> | 81  | 1092 | 1172 |
| LmjF33.1400 | <i>L. major</i> | 201 | 1190 | 1390 |
| LmjF33.1400 | <i>L. major</i> | 306 | 1406 | 1711 |
| LmjF33.1400 | <i>L. major</i> | 228 | 1727 | 1954 |
| LmjF33.1410 | <i>L. major</i> | 137 | 55   | 191  |
| LmjF33.1410 | <i>L. major</i> | 82  | 199  | 280  |
| LmjF33.1430 | <i>L. major</i> | 40  | 52   | 91   |
| LmjF33.1430 | <i>L. major</i> | 70  | 114  | 183  |
| LmjF33.1430 | <i>L. major</i> | 47  | 209  | 255  |
| LmjF33.1430 | <i>L. major</i> | 81  | 337  | 417  |
| LmjF33.1440 | <i>L. major</i> | 49  | 1    | 49   |
| LmjF33.1440 | <i>L. major</i> | 214 | 52   | 265  |
| LmjF33.1440 | <i>L. major</i> | 54  | 283  | 336  |
| LmjF33.1440 | <i>L. major</i> | 73  | 375  | 447  |
| LmjF33.1440 | <i>L. major</i> | 82  | 455  | 536  |
| LmjF33.1460 | <i>L. major</i> | 117 | 93   | 209  |
| LmjF33.1460 | <i>L. major</i> | 104 | 224  | 327  |
| LmjF33.1460 | <i>L. major</i> | 104 | 224  | 327  |
| LmjF33.1490 | <i>L. major</i> | 109 | 1    | 109  |
| LmjF33.1490 | <i>L. major</i> | 103 | 137  | 239  |
| LmjF33.1490 | <i>L. major</i> | 102 | 241  | 342  |
| LmjF33.1490 | <i>L. major</i> | 111 | 406  | 516  |
| LmjF33.1490 | <i>L. major</i> | 67  | 583  | 649  |
| LmjF33.1490 | <i>L. major</i> | 115 | 718  | 832  |
| LmjF33.1490 | <i>L. major</i> | 45  | 885  | 929  |
| LmjF33.1490 | <i>L. major</i> | 197 | 959  | 1155 |
| LmjF33.1490 | <i>L. major</i> | 88  | 1168 | 1255 |
| LmjF33.1490 | <i>L. major</i> | 69  | 1499 | 1567 |
| LmjF33.1490 | <i>L. major</i> | 232 | 1781 | 2012 |
| LmjF33.1490 | <i>L. major</i> | 48  | 2066 | 2113 |
| LmjF33.1490 | <i>L. major</i> | 73  | 2242 | 2314 |
| LmjF33.1490 | <i>L. major</i> | 329 | 2492 | 2820 |
| LmjF33.1490 | <i>L. major</i> | 66  | 2919 | 2984 |
| LmjF33.1490 | <i>L. major</i> | 127 | 3092 | 3218 |
| LmjF33.1490 | <i>L. major</i> | 64  | 3277 | 3340 |
| LmjF33.1500 | <i>L. major</i> | 43  | 47   | 89   |
| LmjF33.1500 | <i>L. major</i> | 46  | 97   | 142  |
| LmjF33.1500 | <i>L. major</i> | 51  | 607  | 657  |
| LmjF33.1500 | <i>L. major</i> | 50  | 706  | 755  |
| LmjF33.1510 | <i>L. major</i> | 44  | 22   | 65   |
| LmjF33.1510 | <i>L. major</i> | 130 | 160  | 289  |
| LmjF33.1510 | <i>L. major</i> | 46  | 554  | 599  |
| LmjF33.1550 | <i>L. major</i> | 51  | 129  | 179  |
| LmjF33.1550 | <i>L. major</i> | 67  | 219  | 285  |
| LmjF33.1550 | <i>L. major</i> | 67  | 219  | 285  |
| LmjF33.1560 | <i>L. major</i> | 48  | 272  | 319  |
| LmjF33.1560 | <i>L. major</i> | 209 | 462  | 670  |

|             |                 |     |      |      |
|-------------|-----------------|-----|------|------|
| LmjF33.1575 | <i>L. major</i> | 65  | 1    | 65   |
| LmjF33.1575 | <i>L. major</i> | 43  | 273  | 315  |
| LmjF33.1575 | <i>L. major</i> | 97  | 415  | 511  |
| LmjF33.1600 | <i>L. major</i> | 78  | 16   | 93   |
| LmjF33.1600 | <i>L. major</i> | 54  | 98   | 151  |
| LmjF33.1600 | <i>L. major</i> | 56  | 222  | 277  |
| LmjF33.1600 | <i>L. major</i> | 58  | 307  | 364  |
| LmjF33.1600 | <i>L. major</i> | 45  | 720  | 764  |
| LmjF33.1660 | <i>L. major</i> | 68  | 137  | 204  |
| LmjF33.1700 | <i>L. major</i> | 42  | 110  | 151  |
| LmjF33.1700 | <i>L. major</i> | 40  | 802  | 841  |
| LmjF33.1700 | <i>L. major</i> | 51  | 866  | 916  |
| LmjF33.1710 | <i>L. major</i> | 47  | 301  | 347  |
| LmjF33.1730 | <i>L. major</i> | 67  | 827  | 893  |
| LmjF33.1780 | <i>L. major</i> | 101 | 1    | 101  |
| LmjF33.1780 | <i>L. major</i> | 117 | 290  | 406  |
| LmjF33.1780 | <i>L. major</i> | 53  | 1099 | 1151 |
| LmjF33.1780 | <i>L. major</i> | 104 | 1528 | 1631 |
| LmjF33.1820 | <i>L. major</i> | 56  | 375  | 430  |
| LmjF33.1830 | <i>L. major</i> | 58  | 298  | 355  |
| LmjF33.1830 | <i>L. major</i> | 379 | 388  | 766  |
| LmjF33.1830 | <i>L. major</i> | 175 | 783  | 957  |
| LmjF33.1850 | <i>L. major</i> | 68  | 62   | 129  |
| LmjF33.1870 | <i>L. major</i> | 59  | 365  | 423  |
| LmjF33.1870 | <i>L. major</i> | 152 | 501  | 652  |
| LmjF33.1890 | <i>L. major</i> | 72  | 192  | 263  |
| LmjF33.1890 | <i>L. major</i> | 44  | 313  | 356  |
| LmjF33.1890 | <i>L. major</i> | 124 | 358  | 481  |
| LmjF33.1900 | <i>L. major</i> | 65  | 1    | 65   |
| LmjF33.1900 | <i>L. major</i> | 73  | 77   | 149  |
| LmjF33.1900 | <i>L. major</i> | 44  | 161  | 204  |
| LmjF33.1910 | <i>L. major</i> | 122 | 1    | 122  |
| LmjF33.1910 | <i>L. major</i> | 40  | 216  | 255  |
| LmjF33.1920 | <i>L. major</i> | 57  | 133  | 189  |
| LmjF33.1940 | <i>L. major</i> | 59  | 1    | 59   |
| LmjF33.1940 | <i>L. major</i> | 49  | 64   | 112  |
| LmjF33.1940 | <i>L. major</i> | 49  | 64   | 112  |
| LmjF33.1950 | <i>L. major</i> | 54  | 10   | 63   |
| LmjF33.1950 | <i>L. major</i> | 70  | 228  | 297  |
| LmjF33.1950 | <i>L. major</i> | 125 | 552  | 676  |
| LmjF33.1960 | <i>L. major</i> | 111 | 20   | 130  |
| LmjF33.1960 | <i>L. major</i> | 219 | 166  | 384  |
| LmjF33.1960 | <i>L. major</i> | 49  | 416  | 464  |
| LmjF33.1970 | <i>L. major</i> | 74  | 199  | 272  |
| LmjF33.1970 | <i>L. major</i> | 155 | 341  | 495  |
| LmjF33.1990 | <i>L. major</i> | 108 | 152  | 259  |
| LmjF33.1990 | <i>L. major</i> | 65  | 291  | 355  |

|             |                 |     |      |      |
|-------------|-----------------|-----|------|------|
| LmjF33.1990 | <i>L. major</i> | 126 | 412  | 537  |
| LmjF33.2010 | <i>L. major</i> | 172 | 62   | 233  |
| LmjF33.2010 | <i>L. major</i> | 46  | 1071 | 1116 |
| LmjF33.2020 | <i>L. major</i> | 139 | 100  | 238  |
| LmjF33.2020 | <i>L. major</i> | 337 | 253  | 589  |
| LmjF33.2020 | <i>L. major</i> | 92  | 786  | 877  |
| LmjF33.2030 | <i>L. major</i> | 106 | 241  | 346  |
| LmjF33.2030 | <i>L. major</i> | 49  | 746  | 794  |
| LmjF33.2030 | <i>L. major</i> | 49  | 746  | 794  |
| LmjF33.2070 | <i>L. major</i> | 363 | 414  | 776  |
| LmjF33.2070 | <i>L. major</i> | 70  | 780  | 849  |
| LmjF33.2070 | <i>L. major</i> | 107 | 866  | 972  |
| LmjF33.2080 | <i>L. major</i> | 70  | 93   | 162  |
| LmjF33.2080 | <i>L. major</i> | 106 | 292  | 397  |
| LmjF33.2080 | <i>L. major</i> | 98  | 414  | 511  |
| LmjF33.2080 | <i>L. major</i> | 76  | 553  | 628  |
| LmjF33.2080 | <i>L. major</i> | 100 | 669  | 768  |
| LmjF33.2080 | <i>L. major</i> | 46  | 1000 | 1045 |
| LmjF33.2080 | <i>L. major</i> | 66  | 1069 | 1134 |
| LmjF33.2090 | <i>L. major</i> | 167 | 80   | 246  |
| LmjF33.2090 | <i>L. major</i> | 65  | 865  | 929  |
| LmjF33.2090 | <i>L. major</i> | 65  | 865  | 929  |
| LmjF33.2100 | <i>L. major</i> | 77  | 204  | 280  |
| LmjF33.2100 | <i>L. major</i> | 109 | 384  | 492  |
| LmjF33.2110 | <i>L. major</i> | 177 | 1    | 177  |
| LmjF33.2110 | <i>L. major</i> | 62  | 273  | 334  |
| LmjF33.2120 | <i>L. major</i> | 146 | 1    | 146  |
| LmjF33.2130 | <i>L. major</i> | 91  | 1    | 91   |
| LmjF33.2130 | <i>L. major</i> | 178 | 95   | 272  |
| LmjF33.2130 | <i>L. major</i> | 200 | 382  | 581  |
| LmjF33.2130 | <i>L. major</i> | 160 | 692  | 851  |
| LmjF33.2130 | <i>L. major</i> | 66  | 855  | 920  |
| LmjF33.2140 | <i>L. major</i> | 49  | 400  | 448  |
| LmjF33.2140 | <i>L. major</i> | 422 | 535  | 956  |
| LmjF33.2150 | <i>L. major</i> | 207 | 105  | 311  |
| LmjF33.2150 | <i>L. major</i> | 58  | 472  | 529  |
| LmjF33.2170 | <i>L. major</i> | 144 | 168  | 311  |
| LmjF33.2170 | <i>L. major</i> | 47  | 354  | 400  |
| LmjF33.2170 | <i>L. major</i> | 97  | 499  | 595  |
| LmjF33.2170 | <i>L. major</i> | 222 | 643  | 864  |
| LmjF33.2170 | <i>L. major</i> | 313 | 1164 | 1476 |
| LmjF33.2180 | <i>L. major</i> | 184 | 69   | 252  |
| LmjF33.2180 | <i>L. major</i> | 89  | 265  | 353  |
| LmjF33.2180 | <i>L. major</i> | 76  | 376  | 451  |
| LmjF33.2180 | <i>L. major</i> | 179 | 455  | 633  |
| LmjF33.2180 | <i>L. major</i> | 53  | 760  | 812  |
| LmjF33.2180 | <i>L. major</i> | 84  | 849  | 932  |

|             |                 |     |      |      |
|-------------|-----------------|-----|------|------|
| LmjF33.2180 | <i>L. major</i> | 43  | 968  | 1010 |
| LmjF33.2180 | <i>L. major</i> | 68  | 1175 | 1242 |
| LmjF33.2190 | <i>L. major</i> | 45  | 1    | 45   |
| LmjF33.2190 | <i>L. major</i> | 173 | 70   | 242  |
| LmjF33.2190 | <i>L. major</i> | 235 | 251  | 485  |
| LmjF33.2190 | <i>L. major</i> | 95  | 509  | 603  |
| LmjF33.2190 | <i>L. major</i> | 96  | 635  | 730  |
| LmjF33.2200 | <i>L. major</i> | 209 | 1    | 209  |
| LmjF33.2200 | <i>L. major</i> | 50  | 232  | 281  |
| LmjF33.2200 | <i>L. major</i> | 79  | 317  | 395  |
| LmjF33.2205 | <i>L. major</i> | 175 | 1    | 175  |
| LmjF33.2210 | <i>L. major</i> | 72  | 1    | 72   |
| LmjF33.2220 | <i>L. major</i> | 188 | 1    | 188  |
| LmjF33.2220 | <i>L. major</i> | 182 | 214  | 395  |
| LmjF33.2220 | <i>L. major</i> | 116 | 467  | 582  |
| LmjF33.2220 | <i>L. major</i> | 56  | 605  | 660  |
| LmjF33.2240 | <i>L. major</i> | 51  | 175  | 225  |
| LmjF33.2250 | <i>L. major</i> | 87  | 117  | 203  |
| LmjF33.2250 | <i>L. major</i> | 175 | 278  | 452  |
| LmjF33.2260 | <i>L. major</i> | 52  | 158  | 209  |
| LmjF33.2260 | <i>L. major</i> | 77  | 330  | 406  |
| LmjF33.2260 | <i>L. major</i> | 40  | 1278 | 1317 |
| LmjF33.2270 | <i>L. major</i> | 61  | 1    | 61   |
| LmjF33.2270 | <i>L. major</i> | 347 | 104  | 450  |
| LmjF33.2270 | <i>L. major</i> | 71  | 499  | 569  |
| LmjF33.2280 | <i>L. major</i> | 80  | 935  | 1014 |
| LmjF33.2290 | <i>L. major</i> | 366 | 1    | 366  |
| LmjF33.2290 | <i>L. major</i> | 56  | 906  | 961  |
| LmjF33.2290 | <i>L. major</i> | 64  | 1246 | 1309 |
| LmjF33.2290 | <i>L. major</i> | 155 | 1311 | 1465 |
| LmjF33.2290 | <i>L. major</i> | 224 | 1691 | 1914 |
| LmjF33.2310 | <i>L. major</i> | 42  | 53   | 94   |
| LmjF33.2310 | <i>L. major</i> | 236 | 130  | 365  |
| LmjF33.2320 | <i>L. major</i> | 98  | 146  | 243  |
| LmjF33.2320 | <i>L. major</i> | 123 | 544  | 666  |
| LmjF33.2330 | <i>L. major</i> | 272 | 1    | 272  |
| LmjF33.2330 | <i>L. major</i> | 63  | 348  | 410  |
| LmjF33.2330 | <i>L. major</i> | 74  | 447  | 520  |
| LmjF33.2330 | <i>L. major</i> | 194 | 734  | 927  |
| LmjF33.2330 | <i>L. major</i> | 79  | 989  | 1067 |
| LmjF33.2350 | <i>L. major</i> | 104 | 1    | 104  |
| LmjF33.2350 | <i>L. major</i> | 40  | 406  | 445  |
| LmjF33.2350 | <i>L. major</i> | 247 | 604  | 850  |
| LmjF33.2360 | <i>L. major</i> | 100 | 1    | 100  |
| LmjF33.2360 | <i>L. major</i> | 72  | 298  | 369  |
| LmjF33.2360 | <i>L. major</i> | 103 | 389  | 491  |
| LmjF33.2360 | <i>L. major</i> | 83  | 786  | 868  |

|             |                 |     |      |      |
|-------------|-----------------|-----|------|------|
| LmjF33.2370 | <i>L. major</i> | 56  | 1    | 56   |
| LmjF33.2370 | <i>L. major</i> | 160 | 192  | 351  |
| LmjF33.2370 | <i>L. major</i> | 160 | 192  | 351  |
| LmjF33.2380 | <i>L. major</i> | 253 | 289  | 541  |
| LmjF33.2400 | <i>L. major</i> | 169 | 1    | 169  |
| LmjF33.2410 | <i>L. major</i> | 45  | 42   | 86   |
| LmjF33.2410 | <i>L. major</i> | 59  | 556  | 614  |
| LmjF33.2410 | <i>L. major</i> | 59  | 556  | 614  |
| LmjF33.2420 | <i>L. major</i> | 151 | 1    | 151  |
| LmjF33.2420 | <i>L. major</i> | 136 | 270  | 405  |
| LmjF33.2420 | <i>L. major</i> | 90  | 421  | 510  |
| LmjF33.2430 | <i>L. major</i> | 58  | 525  | 582  |
| LmjF33.2440 | <i>L. major</i> | 140 | 1    | 140  |
| LmjF33.2440 | <i>L. major</i> | 87  | 171  | 257  |
| LmjF33.2440 | <i>L. major</i> | 58  | 264  | 321  |
| LmjF33.2440 | <i>L. major</i> | 164 | 343  | 506  |
| LmjF33.2450 | <i>L. major</i> | 47  | 222  | 268  |
| LmjF33.2450 | <i>L. major</i> | 48  | 362  | 409  |
| LmjF33.2450 | <i>L. major</i> | 287 | 434  | 720  |
| LmjF33.2450 | <i>L. major</i> | 72  | 757  | 828  |
| LmjF33.2450 | <i>L. major</i> | 68  | 873  | 940  |
| LmjF33.2450 | <i>L. major</i> | 85  | 986  | 1070 |
| LmjF33.2450 | <i>L. major</i> | 248 | 1126 | 1373 |
| LmjF33.2450 | <i>L. major</i> | 240 | 1403 | 1642 |
| LmjF33.2460 | <i>L. major</i> | 99  | 1    | 99   |
| LmjF33.2460 | <i>L. major</i> | 46  | 270  | 315  |
| LmjF33.2460 | <i>L. major</i> | 93  | 447  | 539  |
| LmjF33.2460 | <i>L. major</i> | 63  | 989  | 1051 |
| LmjF33.2480 | <i>L. major</i> | 68  | 69   | 136  |
| LmjF33.2480 | <i>L. major</i> | 40  | 367  | 406  |
| LmjF33.2480 | <i>L. major</i> | 40  | 367  | 406  |
| LmjF33.2490 | <i>L. major</i> | 185 | 34   | 218  |
| LmjF33.2490 | <i>L. major</i> | 51  | 306  | 356  |
| LmjF33.2490 | <i>L. major</i> | 94  | 398  | 491  |
| LmjF33.2490 | <i>L. major</i> | 86  | 602  | 687  |
| LmjF33.2510 | <i>L. major</i> | 55  | 48   | 102  |
| LmjF33.2510 | <i>L. major</i> | 69  | 250  | 318  |
| LmjF33.2510 | <i>L. major</i> | 57  | 359  | 415  |
| LmjF33.2520 | <i>L. major</i> | 51  | 162  | 212  |
| LmjF33.2530 | <i>L. major</i> | 73  | 1    | 73   |
| LmjF33.2530 | <i>L. major</i> | 41  | 566  | 606  |
| LmjF33.2530 | <i>L. major</i> | 62  | 996  | 1057 |
| LmjF33.2530 | <i>L. major</i> | 141 | 1106 | 1246 |
| LmjF33.2530 | <i>L. major</i> | 42  | 1251 | 1292 |
| LmjF33.2560 | <i>L. major</i> | 43  | 1    | 43   |
| LmjF33.2560 | <i>L. major</i> | 49  | 286  | 334  |
| LmjF33.2560 | <i>L. major</i> | 43  | 396  | 438  |



|             |                 |     |      |      |
|-------------|-----------------|-----|------|------|
| LmjF33.2560 | <i>L. major</i> | 208 | 472  | 679  |
| LmjF33.2560 | <i>L. major</i> | 54  | 726  | 779  |
| LmjF33.2560 | <i>L. major</i> | 319 | 857  | 1175 |
| LmjF33.2560 | <i>L. major</i> | 44  | 1657 | 1700 |
| LmjF33.2585 | <i>L. major</i> | 81  | 1    | 81   |
| LmjF33.2585 | <i>L. major</i> | 49  | 91   | 139  |
| LmjF33.2585 | <i>L. major</i> | 75  | 221  | 295  |
| LmjF33.2585 | <i>L. major</i> | 77  | 369  | 445  |
| LmjF33.2590 | <i>L. major</i> | 212 | 262  | 473  |
| LmjF33.2590 | <i>L. major</i> | 128 | 523  | 650  |
| LmjF33.2590 | <i>L. major</i> | 68  | 748  | 815  |
| LmjF33.2590 | <i>L. major</i> | 128 | 914  | 1041 |
| LmjF33.2600 | <i>L. major</i> | 51  | 754  | 804  |
| LmjF33.2620 | <i>L. major</i> | 56  | 401  | 456  |
| LmjF33.2630 | <i>L. major</i> | 217 | 1    | 217  |
| LmjF33.2630 | <i>L. major</i> | 161 | 274  | 434  |
| LmjF33.2630 | <i>L. major</i> | 100 | 478  | 577  |
| LmjF33.2630 | <i>L. major</i> | 66  | 779  | 844  |
| LmjF33.2640 | <i>L. major</i> | 55  | 1    | 55   |
| LmjF33.2640 | <i>L. major</i> | 64  | 323  | 386  |
| LmjF33.2640 | <i>L. major</i> | 64  | 323  | 386  |
| LmjF33.2650 | <i>L. major</i> | 51  | 167  | 217  |
| LmjF33.2650 | <i>L. major</i> | 68  | 364  | 431  |
| LmjF33.2650 | <i>L. major</i> | 46  | 657  | 702  |
| LmjF33.2660 | <i>L. major</i> | 85  | 14   | 98   |
| LmjF33.2660 | <i>L. major</i> | 42  | 185  | 226  |
| LmjF33.2660 | <i>L. major</i> | 44  | 299  | 342  |
| LmjF33.2660 | <i>L. major</i> | 79  | 464  | 542  |
| LmjF33.2660 | <i>L. major</i> | 41  | 602  | 642  |
| LmjF33.2660 | <i>L. major</i> | 58  | 653  | 710  |
| LmjF33.2660 | <i>L. major</i> | 46  | 766  | 811  |
| LmjF33.2660 | <i>L. major</i> | 82  | 865  | 946  |
| LmjF33.2660 | <i>L. major</i> | 54  | 987  | 1040 |
| LmjF33.2660 | <i>L. major</i> | 92  | 1075 | 1166 |
| LmjF33.2670 | <i>L. major</i> | 84  | 1    | 84   |
| LmjF33.2670 | <i>L. major</i> | 186 | 109  | 294  |
| LmjF33.2670 | <i>L. major</i> | 507 | 316  | 822  |
| LmjF33.2670 | <i>L. major</i> | 193 | 883  | 1075 |
| LmjF33.2670 | <i>L. major</i> | 113 | 1120 | 1232 |
| LmjF33.2680 | <i>L. major</i> | 313 | 17   | 329  |
| LmjF33.2680 | <i>L. major</i> | 243 | 412  | 654  |
| LmjF33.2680 | <i>L. major</i> | 134 | 686  | 819  |
| LmjF33.2690 | <i>L. major</i> | 77  | 135  | 211  |
| LmjF33.2700 | <i>L. major</i> | 61  | 542  | 602  |
| LmjF33.2700 | <i>L. major</i> | 125 | 671  | 795  |
| LmjF33.2710 | <i>L. major</i> | 51  | 70   | 120  |
| LmjF33.2720 | <i>L. major</i> | 43  | 58   | 100  |

|             |                 |     |      |      |
|-------------|-----------------|-----|------|------|
| LmjF33.2730 | <i>L. major</i> | 50  | 1    | 50   |
| LmjF33.2730 | <i>L. major</i> | 66  | 96   | 161  |
| LmjF33.2730 | <i>L. major</i> | 66  | 96   | 161  |
| LmjF33.2740 | <i>L. major</i> | 222 | 1    | 222  |
| LmjF33.2750 | <i>L. major</i> | 55  | 43   | 97   |
| LmjF33.2750 | <i>L. major</i> | 66  | 205  | 270  |
| LmjF33.2750 | <i>L. major</i> | 95  | 375  | 469  |
| LmjF33.2750 | <i>L. major</i> | 71  | 600  | 670  |
| LmjF33.2750 | <i>L. major</i> | 59  | 791  | 849  |
| LmjF33.2750 | <i>L. major</i> | 141 | 952  | 1092 |
| LmjF33.2760 | <i>L. major</i> | 212 | 1    | 212  |
| LmjF33.2760 | <i>L. major</i> | 41  | 222  | 262  |
| LmjF33.2760 | <i>L. major</i> | 71  | 340  | 410  |
| LmjF33.2760 | <i>L. major</i> | 42  | 582  | 623  |
| LmjF33.2770 | <i>L. major</i> | 83  | 161  | 243  |
| LmjF33.2780 | <i>L. major</i> | 54  | 35   | 88   |
| LmjF33.2780 | <i>L. major</i> | 113 | 295  | 407  |
| LmjF33.2780 | <i>L. major</i> | 89  | 527  | 615  |
| LmjF33.2780 | <i>L. major</i> | 60  | 659  | 718  |
| LmjF33.2780 | <i>L. major</i> | 213 | 773  | 985  |
| LmjF33.2780 | <i>L. major</i> | 49  | 1075 | 1123 |
| LmjF33.2780 | <i>L. major</i> | 95  | 1243 | 1337 |
| LmjF33.2780 | <i>L. major</i> | 66  | 1918 | 1983 |
| LmjF33.2780 | <i>L. major</i> | 128 | 2487 | 2614 |
| LmjF33.2780 | <i>L. major</i> | 81  | 2627 | 2707 |
| LmjF33.2780 | <i>L. major</i> | 352 | 2879 | 3230 |
| LmjF33.2780 | <i>L. major</i> | 174 | 3344 | 3517 |
| LmjF33.2780 | <i>L. major</i> | 66  | 3872 | 3937 |
| LmjF33.2780 | <i>L. major</i> | 77  | 4050 | 4126 |
| LmjF33.2780 | <i>L. major</i> | 47  | 4502 | 4548 |
| LmjF33.2780 | <i>L. major</i> | 51  | 4970 | 5020 |
| LmjF33.2790 | <i>L. major</i> | 51  | 189  | 239  |
| LmjF33.2790 | <i>L. major</i> | 66  | 287  | 352  |
| LmjF33.2790 | <i>L. major</i> | 55  | 424  | 478  |
| LmjF33.2800 | <i>L. major</i> | 44  | 1    | 44   |
| LmjF33.2810 | <i>L. major</i> | 84  | 92   | 175  |
| LmjF33.2810 | <i>L. major</i> | 74  | 245  | 318  |
| LmjF33.2810 | <i>L. major</i> | 41  | 383  | 423  |
| LmjF33.2820 | <i>L. major</i> | 241 | 58   | 298  |
| LmjF33.2820 | <i>L. major</i> | 74  | 498  | 571  |
| LmjF33.2835 | <i>L. major</i> | 158 | 46   | 203  |
| LmjF33.2835 | <i>L. major</i> | 199 | 240  | 438  |
| LmjF33.2850 | <i>L. major</i> | 56  | 44   | 99   |
| LmjF33.2860 | <i>L. major</i> | 81  | 1    | 81   |
| LmjF33.2860 | <i>L. major</i> | 57  | 326  | 382  |
| LmjF33.2860 | <i>L. major</i> | 57  | 326  | 382  |
| LmjF33.2880 | <i>L. major</i> | 68  | 175  | 242  |

|             |                 |     |      |      |
|-------------|-----------------|-----|------|------|
| LmjF33.2880 | <i>L. major</i> | 50  | 256  | 305  |
| LmjF33.2880 | <i>L. major</i> | 66  | 349  | 414  |
| LmjF33.2890 | <i>L. major</i> | 76  | 82   | 157  |
| LmjF33.2890 | <i>L. major</i> | 97  | 193  | 289  |
| LmjF33.2890 | <i>L. major</i> | 54  | 325  | 378  |
| LmjF33.2890 | <i>L. major</i> | 457 | 431  | 887  |
| LmjF33.2890 | <i>L. major</i> | 246 | 904  | 1149 |
| LmjF33.2890 | <i>L. major</i> | 122 | 1167 | 1288 |
| LmjF33.2890 | <i>L. major</i> | 433 | 1532 | 1964 |
| LmjF33.2890 | <i>L. major</i> | 95  | 2290 | 2384 |
| LmjF33.2900 | <i>L. major</i> | 67  | 1    | 67   |
| LmjF33.2900 | <i>L. major</i> | 334 | 79   | 412  |
| LmjF33.2900 | <i>L. major</i> | 200 | 446  | 645  |
| LmjF33.2900 | <i>L. major</i> | 81  | 662  | 742  |
| LmjF33.2900 | <i>L. major</i> | 351 | 758  | 1108 |
| LmjF33.2900 | <i>L. major</i> | 46  | 1230 | 1275 |
| LmjF33.2900 | <i>L. major</i> | 64  | 1640 | 1703 |
| LmjF33.2900 | <i>L. major</i> | 83  | 2101 | 2183 |
| LmjF33.2900 | <i>L. major</i> | 43  | 2235 | 2277 |
| LmjF33.2900 | <i>L. major</i> | 45  | 2602 | 2646 |
| LmjF33.2910 | <i>L. major</i> | 99  | 1    | 99   |
| LmjF33.2910 | <i>L. major</i> | 98  | 155  | 252  |
| LmjF33.2910 | <i>L. major</i> | 57  | 573  | 629  |
| LmjF33.2910 | <i>L. major</i> | 125 | 905  | 1029 |
| LmjF33.2910 | <i>L. major</i> | 48  | 1287 | 1334 |
| LmjF33.2910 | <i>L. major</i> | 82  | 1356 | 1437 |
| LmjF33.2920 | <i>L. major</i> | 288 | 24   | 311  |
| LmjF33.2930 | <i>L. major</i> | 263 | 51   | 313  |
| LmjF33.2930 | <i>L. major</i> | 100 | 593  | 692  |
| LmjF33.2930 | <i>L. major</i> | 66  | 1015 | 1080 |
| LmjF33.2940 | <i>L. major</i> | 201 | 1    | 201  |
| LmjF33.2940 | <i>L. major</i> | 100 | 214  | 313  |
| LmjF33.2940 | <i>L. major</i> | 84  | 575  | 658  |
| LmjF33.2960 | <i>L. major</i> | 203 | 1    | 203  |
| LmjF33.2960 | <i>L. major</i> | 164 | 214  | 377  |
| LmjF33.2960 | <i>L. major</i> | 77  | 594  | 670  |
| LmjF33.2970 | <i>L. major</i> | 50  | 1    | 50   |
| LmjF33.2970 | <i>L. major</i> | 54  | 62   | 115  |
| LmjF33.2970 | <i>L. major</i> | 162 | 134  | 295  |
| LmjF33.2970 | <i>L. major</i> | 241 | 317  | 557  |
| LmjF33.2970 | <i>L. major</i> | 358 | 587  | 944  |
| LmjF33.2970 | <i>L. major</i> | 89  | 997  | 1085 |
| LmjF33.2970 | <i>L. major</i> | 67  | 1171 | 1237 |
| LmjF33.2970 | <i>L. major</i> | 90  | 1251 | 1340 |
| LmjF33.2980 | <i>L. major</i> | 360 | 1    | 360  |
| LmjF33.2980 | <i>L. major</i> | 51  | 678  | 728  |
| LmjF33.2980 | <i>L. major</i> | 159 | 1023 | 1181 |

|             |                 |     |      |      |
|-------------|-----------------|-----|------|------|
| LmjF33.2990 | <i>L. major</i> | 102 | 1    | 102  |
| LmjF33.2990 | <i>L. major</i> | 110 | 223  | 332  |
| LmjF33.3000 | <i>L. major</i> | 528 | 1    | 528  |
| LmjF33.3000 | <i>L. major</i> | 62  | 898  | 959  |
| LmjF33.3010 | <i>L. major</i> | 646 | 42   | 687  |
| LmjF33.3020 | <i>L. major</i> | 381 | 1    | 381  |
| LmjF33.3020 | <i>L. major</i> | 109 | 395  | 503  |
| LmjF33.3020 | <i>L. major</i> | 123 | 511  | 633  |
| LmjF33.3020 | <i>L. major</i> | 334 | 642  | 975  |
| LmjF33.3030 | <i>L. major</i> | 98  | 1    | 98   |
| LmjF33.3030 | <i>L. major</i> | 75  | 101  | 175  |
| LmjF33.3030 | <i>L. major</i> | 246 | 196  | 441  |
| LmjF33.3030 | <i>L. major</i> | 62  | 460  | 521  |
| LmjF33.3030 | <i>L. major</i> | 154 | 632  | 785  |
| LmjF33.3030 | <i>L. major</i> | 274 | 801  | 1074 |
| LmjF33.3040 | <i>L. major</i> | 46  | 279  | 324  |
| LmjF33.3040 | <i>L. major</i> | 50  | 561  | 610  |
| LmjF33.3040 | <i>L. major</i> | 45  | 1053 | 1097 |
| LmjF33.3050 | <i>L. major</i> | 72  | 81   | 152  |
| LmjF33.3050 | <i>L. major</i> | 49  | 237  | 285  |
| LmjF33.3050 | <i>L. major</i> | 40  | 569  | 608  |
| LmjF33.3070 | <i>L. major</i> | 115 | 1    | 115  |
| LmjF33.3070 | <i>L. major</i> | 74  | 199  | 272  |
| LmjF33.3070 | <i>L. major</i> | 74  | 359  | 432  |
| LmjF33.3070 | <i>L. major</i> | 133 | 519  | 651  |
| LmjF33.3070 | <i>L. major</i> | 73  | 739  | 811  |
| LmjF33.3070 | <i>L. major</i> | 64  | 898  | 961  |
| LmjF33.3070 | <i>L. major</i> | 64  | 1045 | 1108 |
| LmjF33.3070 | <i>L. major</i> | 64  | 1192 | 1255 |
| LmjF33.3070 | <i>L. major</i> | 64  | 1339 | 1402 |
| LmjF33.3070 | <i>L. major</i> | 133 | 1486 | 1618 |
| LmjF33.3070 | <i>L. major</i> | 73  | 1706 | 1778 |
| LmjF33.3070 | <i>L. major</i> | 74  | 1865 | 1938 |
| LmjF33.3070 | <i>L. major</i> | 73  | 2026 | 2098 |
| LmjF33.3070 | <i>L. major</i> | 74  | 2185 | 2258 |
| LmjF33.3070 | <i>L. major</i> | 63  | 2345 | 2407 |
| LmjF33.3070 | <i>L. major</i> | 74  | 2492 | 2565 |
| LmjF33.3070 | <i>L. major</i> | 64  | 2652 | 2715 |
| LmjF33.3070 | <i>L. major</i> | 64  | 2799 | 2862 |
| LmjF33.3070 | <i>L. major</i> | 73  | 2947 | 3019 |
| LmjF33.3070 | <i>L. major</i> | 137 | 3106 | 3242 |
| LmjF33.3070 | <i>L. major</i> | 75  | 3325 | 3399 |
| LmjF33.3070 | <i>L. major</i> | 74  | 3485 | 3558 |
| LmjF33.3070 | <i>L. major</i> | 136 | 3645 | 3780 |
| LmjF33.3070 | <i>L. major</i> | 74  | 3864 | 3937 |
| LmjF33.3070 | <i>L. major</i> | 74  | 4024 | 4097 |
| LmjF33.3070 | <i>L. major</i> | 137 | 4184 | 4320 |

|             |                 |      |      |      |
|-------------|-----------------|------|------|------|
| LmjF33.3070 | <i>L. major</i> | 75   | 4403 | 4477 |
| LmjF33.3070 | <i>L. major</i> | 74   | 4563 | 4636 |
| LmjF33.3070 | <i>L. major</i> | 137  | 4723 | 4859 |
| LmjF33.3070 | <i>L. major</i> | 74   | 4942 | 5015 |
| LmjF33.3070 | <i>L. major</i> | 137  | 5102 | 5238 |
| LmjF33.3070 | <i>L. major</i> | 1532 | 5321 | 6852 |
| LmjF33.3070 | <i>L. major</i> | 133  | 6971 | 7103 |
| LmjF33.3070 | <i>L. major</i> | 243  | 7309 | 7551 |
| LmjF33.3080 | <i>L. major</i> | 102  | 35   | 136  |
| LmjF33.3080 | <i>L. major</i> | 55   | 164  | 218  |
| LmjF33.3080 | <i>L. major</i> | 47   | 259  | 305  |
| LmjF33.3080 | <i>L. major</i> | 45   | 343  | 387  |
| LmjF33.3080 | <i>L. major</i> | 70   | 414  | 483  |
| LmjF33.3080 | <i>L. major</i> | 51   | 604  | 654  |
| LmjF33.3080 | <i>L. major</i> | 53   | 690  | 742  |
| LmjF33.3080 | <i>L. major</i> | 116  | 753  | 868  |
| LmjF33.3080 | <i>L. major</i> | 137  | 879  | 1015 |
| LmjF33.3080 | <i>L. major</i> | 44   | 1371 | 1414 |
| LmjF33.3080 | <i>L. major</i> | 302  | 1711 | 2012 |
| LmjF33.3080 | <i>L. major</i> | 97   | 2054 | 2150 |
| LmjF33.3090 | <i>L. major</i> | 142  | 1    | 142  |
| LmjF33.3090 | <i>L. major</i> | 43   | 1148 | 1190 |
| LmjF33.3100 | <i>L. major</i> | 55   | 233  | 287  |
| LmjF33.3100 | <i>L. major</i> | 50   | 358  | 407  |
| LmjF33.3100 | <i>L. major</i> | 50   | 358  | 407  |
| LmjF33.3150 | <i>L. major</i> | 54   | 1    | 54   |
| LmjF33.3160 | <i>L. major</i> | 65   | 1    | 65   |
| LmjF33.3160 | <i>L. major</i> | 73   | 269  | 341  |
| LmjF33.3160 | <i>L. major</i> | 44   | 367  | 410  |
| LmjF33.3170 | <i>L. major</i> | 307  | 183  | 489  |
| LmjF33.3180 | <i>L. major</i> | 40   | 343  | 382  |
| LmjF33.3180 | <i>L. major</i> | 214  | 399  | 612  |
| LmjF33.3210 | <i>L. major</i> | 92   | 793  | 884  |
| LmjF33.3230 | <i>L. major</i> | 49   | 30   | 78   |
| LmjF33.3240 | <i>L. major</i> | 143  | 1    | 143  |
| LmjF33.3250 | <i>L. major</i> | 337  | 1    | 337  |
| LmjF34.0030 | <i>L. major</i> | 44   | 352  | 395  |
| LmjF34.0040 | <i>L. major</i> | 48   | 398  | 445  |
| LmjF34.0040 | <i>L. major</i> | 64   | 508  | 571  |
| LmjF34.0040 | <i>L. major</i> | 64   | 508  | 571  |
| LmjF34.0060 | <i>L. major</i> | 43   | 237  | 279  |
| LmjF34.0060 | <i>L. major</i> | 63   | 509  | 571  |
| LmjF34.0060 | <i>L. major</i> | 56   | 614  | 669  |
| LmjF34.0060 | <i>L. major</i> | 135  | 882  | 1016 |
| LmjF34.0090 | <i>L. major</i> | 58   | 42   | 99   |
| LmjF34.0100 | <i>L. major</i> | 108  | 421  | 528  |
| LmjF34.0110 | <i>L. major</i> | 41   | 125  | 165  |

|             |                 |     |      |      |
|-------------|-----------------|-----|------|------|
| LmjF34.0170 | <i>L. major</i> | 332 | 1    | 332  |
| LmjF34.0175 | <i>L. major</i> | 153 | 1    | 153  |
| LmjF34.0175 | <i>L. major</i> | 77  | 178  | 254  |
| LmjF34.0175 | <i>L. major</i> | 234 | 260  | 493  |
| LmjF34.0175 | <i>L. major</i> | 126 | 509  | 634  |
| LmjF34.0180 | <i>L. major</i> | 101 | 263  | 363  |
| LmjF34.0180 | <i>L. major</i> | 46  | 427  | 472  |
| LmjF34.0200 | <i>L. major</i> | 54  | 350  | 403  |
| LmjF34.0210 | <i>L. major</i> | 90  | 120  | 209  |
| LmjF34.0230 | <i>L. major</i> | 243 | 202  | 444  |
| LmjF34.0230 | <i>L. major</i> | 113 | 547  | 659  |
| LmjF34.0240 | <i>L. major</i> | 450 | 73   | 522  |
| LmjF34.0240 | <i>L. major</i> | 312 | 538  | 849  |
| LmjF34.0240 | <i>L. major</i> | 51  | 883  | 933  |
| LmjF34.0240 | <i>L. major</i> | 306 | 1032 | 1337 |
| LmjF34.0250 | <i>L. major</i> | 172 | 1    | 172  |
| LmjF34.0250 | <i>L. major</i> | 96  | 189  | 284  |
| LmjF34.0250 | <i>L. major</i> | 88  | 296  | 383  |
| LmjF34.0260 | <i>L. major</i> | 77  | 1    | 77   |
| LmjF34.0270 | <i>L. major</i> | 74  | 300  | 373  |
| LmjF34.0280 | <i>L. major</i> | 198 | 1    | 198  |
| LmjF34.0280 | <i>L. major</i> | 59  | 231  | 289  |
| LmjF34.0280 | <i>L. major</i> | 72  | 322  | 393  |
| LmjF34.0280 | <i>L. major</i> | 41  | 1348 | 1388 |
| LmjF34.0300 | <i>L. major</i> | 82  | 1    | 82   |
| LmjF34.0300 | <i>L. major</i> | 150 | 608  | 757  |
| LmjF34.0310 | <i>L. major</i> | 146 | 251  | 396  |
| LmjF34.0320 | <i>L. major</i> | 62  | 297  | 358  |
| LmjF34.0330 | <i>L. major</i> | 62  | 207  | 268  |
| LmjF34.0330 | <i>L. major</i> | 47  | 411  | 457  |
| LmjF34.0340 | <i>L. major</i> | 43  | 163  | 205  |
| LmjF34.0340 | <i>L. major</i> | 105 | 217  | 321  |
| LmjF34.0340 | <i>L. major</i> | 66  | 386  | 451  |
| LmjF34.0340 | <i>L. major</i> | 86  | 579  | 664  |
| LmjF34.0350 | <i>L. major</i> | 75  | 134  | 208  |
| LmjF34.0360 | <i>L. major</i> | 42  | 748  | 789  |
| LmjF34.0360 | <i>L. major</i> | 103 | 1004 | 1106 |
| LmjF34.0360 | <i>L. major</i> | 62  | 1483 | 1544 |
| LmjF34.0370 | <i>L. major</i> | 103 | 1    | 103  |
| LmjF34.0370 | <i>L. major</i> | 50  | 133  | 182  |
| LmjF34.0370 | <i>L. major</i> | 42  | 269  | 310  |
| LmjF34.0370 | <i>L. major</i> | 40  | 486  | 525  |
| LmjF34.0370 | <i>L. major</i> | 45  | 780  | 824  |
| LmjF34.0380 | <i>L. major</i> | 64  | 162  | 225  |
| LmjF34.0380 | <i>L. major</i> | 50  | 376  | 425  |
| LmjF34.0380 | <i>L. major</i> | 50  | 376  | 425  |
| LmjF34.0390 | <i>L. major</i> | 42  | 323  | 364  |

|             |                 |     |      |      |
|-------------|-----------------|-----|------|------|
| LmjF34.0390 | <i>L. major</i> | 45  | 368  | 412  |
| LmjF34.0390 | <i>L. major</i> | 45  | 368  | 412  |
| LmjF34.0410 | <i>L. major</i> | 48  | 332  | 379  |
| LmjF34.0420 | <i>L. major</i> | 83  | 43   | 125  |
| LmjF34.0420 | <i>L. major</i> | 58  | 254  | 311  |
| LmjF34.0430 | <i>L. major</i> | 74  | 29   | 102  |
| LmjF34.0440 | <i>L. major</i> | 40  | 1    | 40   |
| LmjF34.0450 | <i>L. major</i> | 936 | 1    | 936  |
| LmjF34.0460 | <i>L. major</i> | 71  | 1745 | 1815 |
| LmjF34.0460 | <i>L. major</i> | 68  | 1855 | 1922 |
| LmjF34.0460 | <i>L. major</i> | 42  | 1956 | 1997 |
| LmjF34.0460 | <i>L. major</i> | 168 | 2180 | 2347 |
| LmjF34.0470 | <i>L. major</i> | 333 | 384  | 716  |
| LmjF34.0480 | <i>L. major</i> | 133 | 461  | 593  |
| LmjF34.0480 | <i>L. major</i> | 119 | 643  | 761  |
| LmjF34.0480 | <i>L. major</i> | 66  | 810  | 875  |
| LmjF34.0480 | <i>L. major</i> | 81  | 1268 | 1348 |
| LmjF34.0480 | <i>L. major</i> | 45  | 1367 | 1411 |
| LmjF34.0480 | <i>L. major</i> | 171 | 2385 | 2555 |
| LmjF34.0495 | <i>L. major</i> | 217 | 41   | 257  |
| LmjF34.0510 | <i>L. major</i> | 50  | 1    | 50   |
| LmjF34.0510 | <i>L. major</i> | 51  | 491  | 541  |
| LmjF34.0510 | <i>L. major</i> | 51  | 491  | 541  |
| LmjF34.0520 | <i>L. major</i> | 291 | 1    | 291  |
| LmjF34.0520 | <i>L. major</i> | 442 | 332  | 773  |
| LmjF34.0520 | <i>L. major</i> | 52  | 807  | 858  |
| LmjF34.0520 | <i>L. major</i> | 555 | 889  | 1443 |
| LmjF34.0530 | <i>L. major</i> | 299 | 1    | 299  |
| LmjF34.0530 | <i>L. major</i> | 155 | 337  | 491  |
| LmjF34.0540 | <i>L. major</i> | 45  | 67   | 111  |
| LmjF34.0540 | <i>L. major</i> | 48  | 342  | 389  |
| LmjF34.0550 | <i>L. major</i> | 46  | 1    | 46   |
| LmjF34.0550 | <i>L. major</i> | 94  | 59   | 152  |
| LmjF34.0550 | <i>L. major</i> | 106 | 163  | 268  |
| LmjF34.0560 | <i>L. major</i> | 122 | 33   | 154  |
| LmjF34.0560 | <i>L. major</i> | 41  | 426  | 466  |
| LmjF34.0560 | <i>L. major</i> | 53  | 752  | 804  |
| LmjF34.0560 | <i>L. major</i> | 122 | 989  | 1110 |
| LmjF34.0560 | <i>L. major</i> | 54  | 1506 | 1559 |
| LmjF34.0560 | <i>L. major</i> | 158 | 1591 | 1748 |
| LmjF34.0570 | <i>L. major</i> | 51  | 1    | 51   |
| LmjF34.0570 | <i>L. major</i> | 105 | 286  | 390  |
| LmjF34.0570 | <i>L. major</i> | 42  | 470  | 511  |
| LmjF34.0570 | <i>L. major</i> | 46  | 789  | 834  |
| LmjF34.0580 | <i>L. major</i> | 90  | 33   | 122  |
| LmjF34.0590 | <i>L. major</i> | 88  | 148  | 235  |
| LmjF34.0590 | <i>L. major</i> | 41  | 340  | 380  |

|             |                 |      |      |      |
|-------------|-----------------|------|------|------|
| LmjF34.0590 | <i>L. major</i> | 49   | 904  | 952  |
| LmjF34.0590 | <i>L. major</i> | 44   | 983  | 1026 |
| LmjF34.0590 | <i>L. major</i> | 41   | 1052 | 1092 |
| LmjF34.0600 | <i>L. major</i> | 115  | 1    | 115  |
| LmjF34.0600 | <i>L. major</i> | 97   | 153  | 249  |
| LmjF34.0600 | <i>L. major</i> | 259  | 283  | 541  |
| LmjF34.0600 | <i>L. major</i> | 311  | 543  | 853  |
| LmjF34.0610 | <i>L. major</i> | 71   | 200  | 270  |
| LmjF34.0620 | <i>L. major</i> | 772  | 1    | 772  |
| LmjF34.0620 | <i>L. major</i> | 134  | 789  | 922  |
| LmjF34.0620 | <i>L. major</i> | 59   | 1022 | 1080 |
| LmjF34.0620 | <i>L. major</i> | 165  | 1111 | 1275 |
| LmjF34.0620 | <i>L. major</i> | 1082 | 1317 | 2398 |
| LmjF34.0630 | <i>L. major</i> | 168  | 49   | 216  |
| LmjF34.0630 | <i>L. major</i> | 70   | 256  | 325  |
| LmjF34.0630 | <i>L. major</i> | 95   | 443  | 537  |
| LmjF34.0630 | <i>L. major</i> | 49   | 568  | 616  |
| LmjF34.0630 | <i>L. major</i> | 85   | 648  | 732  |
| LmjF34.0660 | <i>L. major</i> | 119  | 1    | 119  |
| LmjF34.0660 | <i>L. major</i> | 228  | 162  | 389  |
| LmjF34.0660 | <i>L. major</i> | 54   | 507  | 560  |
| LmjF34.0660 | <i>L. major</i> | 348  | 651  | 998  |
| LmjF34.0660 | <i>L. major</i> | 40   | 1030 | 1069 |
| LmjF34.0670 | <i>L. major</i> | 68   | 350  | 417  |
| LmjF34.0670 | <i>L. major</i> | 67   | 646  | 712  |
| LmjF34.0670 | <i>L. major</i> | 60   | 776  | 835  |
| LmjF34.0670 | <i>L. major</i> | 46   | 980  | 1025 |
| LmjF34.0670 | <i>L. major</i> | 90   | 1257 | 1346 |
| LmjF34.0670 | <i>L. major</i> | 78   | 1682 | 1759 |
| LmjF34.0670 | <i>L. major</i> | 97   | 1875 | 1971 |
| LmjF34.0680 | <i>L. major</i> | 91   | 372  | 462  |
| LmjF34.0680 | <i>L. major</i> | 106  | 479  | 584  |
| LmjF34.0680 | <i>L. major</i> | 83   | 602  | 684  |
| LmjF34.0680 | <i>L. major</i> | 106  | 701  | 806  |
| LmjF34.0680 | <i>L. major</i> | 83   | 824  | 906  |
| LmjF34.0680 | <i>L. major</i> | 102  | 923  | 1024 |
| LmjF34.0680 | <i>L. major</i> | 97   | 1100 | 1196 |
| LmjF34.0690 | <i>L. major</i> | 71   | 598  | 668  |
| LmjF34.0690 | <i>L. major</i> | 127  | 670  | 796  |
| LmjF34.0690 | <i>L. major</i> | 2186 | 808  | 2993 |
| LmjF34.0690 | <i>L. major</i> | 43   | 3027 | 3069 |
| LmjF34.0700 | <i>L. major</i> | 120  | 110  | 229  |
| LmjF34.0710 | <i>L. major</i> | 41   | 130  | 170  |
| LmjF34.0710 | <i>L. major</i> | 55   | 239  | 293  |
| LmjF34.0710 | <i>L. major</i> | 55   | 715  | 769  |
| LmjF34.0720 | <i>L. major</i> | 132  | 287  | 418  |
| LmjF34.0740 | <i>L. major</i> | 43   | 341  | 383  |



|             |                 |     |      |      |
|-------------|-----------------|-----|------|------|
| LmjF34.0760 | <i>L. major</i> | 61  | 139  | 199  |
| LmjF34.0770 | <i>L. major</i> | 144 | 1    | 144  |
| LmjF34.0820 | <i>L. major</i> | 87  | 68   | 154  |
| LmjF34.0840 | <i>L. major</i> | 87  | 68   | 154  |
| LmjF34.0860 | <i>L. major</i> | 46  | 177  | 222  |
| LmjF34.0870 | <i>L. major</i> | 66  | 15   | 80   |
| LmjF34.0870 | <i>L. major</i> | 81  | 180  | 260  |
| LmjF34.0870 | <i>L. major</i> | 61  | 299  | 359  |
| LmjF34.0870 | <i>L. major</i> | 132 | 431  | 562  |
| LmjF34.0880 | <i>L. major</i> | 40  | 1    | 40   |
| LmjF34.0880 | <i>L. major</i> | 72  | 453  | 524  |
| LmjF34.0880 | <i>L. major</i> | 72  | 453  | 524  |
| LmjF34.0890 | <i>L. major</i> | 67  | 1    | 67   |
| LmjF34.0900 | <i>L. major</i> | 100 | 164  | 263  |
| LmjF34.0920 | <i>L. major</i> | 317 | 81   | 397  |
| LmjF34.0920 | <i>L. major</i> | 56  | 597  | 652  |
| LmjF34.0940 | <i>L. major</i> | 484 | 1    | 484  |
| LmjF34.0940 | <i>L. major</i> | 41  | 571  | 611  |
| LmjF34.0940 | <i>L. major</i> | 49  | 704  | 752  |
| LmjF34.0940 | <i>L. major</i> | 73  | 835  | 907  |
| LmjF34.0940 | <i>L. major</i> | 63  | 939  | 1001 |
| LmjF34.0950 | <i>L. major</i> | 46  | 549  | 594  |
| LmjF34.1000 | <i>L. major</i> | 50  | 274  | 323  |
| LmjF34.1000 | <i>L. major</i> | 40  | 1054 | 1093 |
| LmjF34.1000 | <i>L. major</i> | 213 | 1161 | 1373 |
| LmjF34.1010 | <i>L. major</i> | 91  | 125  | 215  |
| LmjF34.1010 | <i>L. major</i> | 55  | 246  | 300  |
| LmjF34.1010 | <i>L. major</i> | 143 | 345  | 487  |
| LmjF34.1020 | <i>L. major</i> | 55  | 1    | 55   |
| LmjF34.1030 | <i>L. major</i> | 92  | 21   | 112  |
| LmjF34.1050 | <i>L. major</i> | 46  | 1    | 46   |
| LmjF34.1050 | <i>L. major</i> | 57  | 180  | 236  |
| LmjF34.1050 | <i>L. major</i> | 57  | 180  | 236  |
| LmjF34.1070 | <i>L. major</i> | 80  | 275  | 354  |
| LmjF34.1090 | <i>L. major</i> | 50  | 50   | 99   |
| LmjF34.1090 | <i>L. major</i> | 55  | 596  | 650  |
| LmjF34.1090 | <i>L. major</i> | 87  | 933  | 1019 |
| LmjF34.1100 | <i>L. major</i> | 114 | 38   | 151  |
| LmjF34.1100 | <i>L. major</i> | 58  | 237  | 294  |
| LmjF34.1110 | <i>L. major</i> | 268 | 268  | 535  |
| LmjF34.1120 | <i>L. major</i> | 110 | 119  | 228  |
| LmjF34.1130 | <i>L. major</i> | 592 | 1    | 592  |
| LmjF34.1130 | <i>L. major</i> | 541 | 594  | 1134 |
| LmjF34.1130 | <i>L. major</i> | 114 | 1184 | 1297 |
| LmjF34.1130 | <i>L. major</i> | 587 | 1325 | 1911 |
| LmjF34.1130 | <i>L. major</i> | 486 | 1920 | 2405 |
| LmjF34.1140 | <i>L. major</i> | 42  | 347  | 388  |

|             |                 |     |      |      |
|-------------|-----------------|-----|------|------|
| LmjF34.1150 | <i>L. major</i> | 67  | 1    | 67   |
| LmjF34.1150 | <i>L. major</i> | 95  | 149  | 243  |
| LmjF34.1150 | <i>L. major</i> | 49  | 288  | 336  |
| LmjF34.1155 | <i>L. major</i> | 87  | 98   | 184  |
| LmjF34.1160 | <i>L. major</i> | 65  | 347  | 411  |
| LmjF34.1170 | <i>L. major</i> | 617 | 49   | 665  |
| LmjF34.1175 | <i>L. major</i> | 79  | 180  | 258  |
| LmjF34.1180 | <i>L. major</i> | 55  | 103  | 157  |
| LmjF34.1180 | <i>L. major</i> | 82  | 218  | 299  |
| LmjF34.1190 | <i>L. major</i> | 91  | 78   | 168  |
| LmjF34.1190 | <i>L. major</i> | 64  | 233  | 296  |
| LmjF34.1190 | <i>L. major</i> | 76  | 392  | 467  |
| LmjF34.1190 | <i>L. major</i> | 64  | 1139 | 1202 |
| LmjF34.1190 | <i>L. major</i> | 79  | 1242 | 1320 |
| LmjF34.1190 | <i>L. major</i> | 50  | 1482 | 1531 |
| LmjF34.1210 | <i>L. major</i> | 42  | 92   | 133  |
| LmjF34.1210 | <i>L. major</i> | 76  | 220  | 295  |
| LmjF34.1210 | <i>L. major</i> | 65  | 411  | 475  |
| LmjF34.1220 | <i>L. major</i> | 48  | 73   | 120  |
| LmjF34.1220 | <i>L. major</i> | 49  | 193  | 241  |
| LmjF34.1220 | <i>L. major</i> | 160 | 545  | 704  |
| LmjF34.1230 | <i>L. major</i> | 83  | 1    | 83   |
| LmjF34.1230 | <i>L. major</i> | 43  | 118  | 160  |
| LmjF34.1230 | <i>L. major</i> | 77  | 785  | 861  |
| LmjF34.1230 | <i>L. major</i> | 43  | 1089 | 1131 |
| LmjF34.1230 | <i>L. major</i> | 64  | 1148 | 1211 |
| LmjF34.1230 | <i>L. major</i> | 91  | 1284 | 1374 |
| LmjF34.1230 | <i>L. major</i> | 136 | 1408 | 1543 |
| LmjF34.1240 | <i>L. major</i> | 48  | 174  | 221  |
| LmjF34.1260 | <i>L. major</i> | 87  | 1    | 87   |
| LmjF34.1260 | <i>L. major</i> | 98  | 525  | 622  |
| LmjF34.1270 | <i>L. major</i> | 103 | 71   | 173  |
| LmjF34.1270 | <i>L. major</i> | 40  | 596  | 635  |
| LmjF34.1270 | <i>L. major</i> | 157 | 732  | 888  |
| LmjF34.1270 | <i>L. major</i> | 66  | 915  | 980  |
| LmjF34.1270 | <i>L. major</i> | 40  | 1669 | 1708 |
| LmjF34.1280 | <i>L. major</i> | 80  | 225  | 304  |
| LmjF34.1290 | <i>L. major</i> | 143 | 517  | 659  |
| LmjF34.1290 | <i>L. major</i> | 49  | 667  | 715  |
| LmjF34.1300 | <i>L. major</i> | 67  | 48   | 114  |
| LmjF34.1300 | <i>L. major</i> | 161 | 196  | 356  |
| LmjF34.1310 | <i>L. major</i> | 58  | 1    | 58   |
| LmjF34.1310 | <i>L. major</i> | 120 | 197  | 316  |
| LmjF34.1310 | <i>L. major</i> | 73  | 643  | 715  |
| LmjF34.1310 | <i>L. major</i> | 115 | 743  | 857  |
| LmjF34.1320 | <i>L. major</i> | 219 | 63   | 281  |
| LmjF34.1320 | <i>L. major</i> | 40  | 344  | 383  |

|             |                 |     |      |      |
|-------------|-----------------|-----|------|------|
| LmjF34.1320 | <i>L. major</i> | 81  | 420  | 500  |
| LmjF34.1320 | <i>L. major</i> | 70  | 562  | 631  |
| LmjF34.1320 | <i>L. major</i> | 83  | 689  | 771  |
| LmjF34.1340 | <i>L. major</i> | 55  | 70   | 124  |
| LmjF34.1340 | <i>L. major</i> | 291 | 326  | 616  |
| LmjF34.1340 | <i>L. major</i> | 295 | 1007 | 1301 |
| LmjF34.1350 | <i>L. major</i> | 66  | 1    | 66   |
| LmjF34.1350 | <i>L. major</i> | 76  | 75   | 150  |
| LmjF34.1350 | <i>L. major</i> | 154 | 206  | 359  |
| LmjF34.1360 | <i>L. major</i> | 101 | 50   | 150  |
| LmjF34.1360 | <i>L. major</i> | 50  | 315  | 364  |
| LmjF34.1360 | <i>L. major</i> | 40  | 701  | 740  |
| LmjF34.1360 | <i>L. major</i> | 43  | 850  | 892  |
| LmjF34.1360 | <i>L. major</i> | 139 | 1610 | 1748 |
| LmjF34.1360 | <i>L. major</i> | 51  | 1820 | 1870 |
| LmjF34.1360 | <i>L. major</i> | 60  | 2123 | 2182 |
| LmjF34.1360 | <i>L. major</i> | 156 | 2354 | 2509 |
| LmjF34.1370 | <i>L. major</i> | 60  | 1    | 60   |
| LmjF34.1370 | <i>L. major</i> | 65  | 94   | 158  |
| LmjF34.1370 | <i>L. major</i> | 93  | 232  | 324  |
| LmjF34.1380 | <i>L. major</i> | 140 | 1    | 140  |
| LmjF34.1380 | <i>L. major</i> | 124 | 162  | 285  |
| LmjF34.1380 | <i>L. major</i> | 47  | 319  | 365  |
| LmjF34.1380 | <i>L. major</i> | 134 | 419  | 552  |
| LmjF34.1380 | <i>L. major</i> | 41  | 556  | 596  |
| LmjF34.1380 | <i>L. major</i> | 49  | 600  | 648  |
| LmjF34.1380 | <i>L. major</i> | 61  | 1122 | 1182 |
| LmjF34.1380 | <i>L. major</i> | 101 | 1188 | 1288 |
| LmjF34.1390 | <i>L. major</i> | 40  | 119  | 158  |
| LmjF34.1390 | <i>L. major</i> | 55  | 191  | 245  |
| LmjF34.1390 | <i>L. major</i> | 187 | 469  | 655  |
| LmjF34.1390 | <i>L. major</i> | 64  | 700  | 763  |
| LmjF34.1390 | <i>L. major</i> | 40  | 946  | 985  |
| LmjF34.1390 | <i>L. major</i> | 40  | 1380 | 1419 |
| LmjF34.1390 | <i>L. major</i> | 44  | 1468 | 1511 |
| LmjF34.1390 | <i>L. major</i> | 47  | 1833 | 1879 |
| LmjF34.1390 | <i>L. major</i> | 79  | 1971 | 2049 |
| LmjF34.1390 | <i>L. major</i> | 74  | 2155 | 2228 |
| LmjF34.1390 | <i>L. major</i> | 68  | 2282 | 2349 |
| LmjF34.1390 | <i>L. major</i> | 49  | 2587 | 2635 |
| LmjF34.1390 | <i>L. major</i> | 40  | 3347 | 3386 |
| LmjF34.1390 | <i>L. major</i> | 45  | 4259 | 4303 |
| LmjF34.1390 | <i>L. major</i> | 86  | 4535 | 4620 |
| LmjF34.1390 | <i>L. major</i> | 62  | 4680 | 4741 |
| LmjF34.1420 | <i>L. major</i> | 102 | 117  | 218  |
| LmjF34.1440 | <i>L. major</i> | 242 | 207  | 448  |
| LmjF34.1440 | <i>L. major</i> | 125 | 608  | 732  |

|             |                 |     |     |      |
|-------------|-----------------|-----|-----|------|
| LmjF34.1440 | <i>L. major</i> | 43  | 739 | 781  |
| LmjF34.1450 | <i>L. major</i> | 88  | 50  | 137  |
| LmjF34.1450 | <i>L. major</i> | 64  | 185 | 248  |
| LmjF34.1450 | <i>L. major</i> | 127 | 317 | 443  |
| LmjF34.1450 | <i>L. major</i> | 55  | 466 | 520  |
| LmjF34.1460 | <i>L. major</i> | 61  | 1   | 61   |
| LmjF34.1460 | <i>L. major</i> | 51  | 93  | 143  |
| LmjF34.1460 | <i>L. major</i> | 44  | 477 | 520  |
| LmjF34.1460 | <i>L. major</i> | 46  | 660 | 705  |
| LmjF34.1470 | <i>L. major</i> | 59  | 1   | 59   |
| LmjF34.1470 | <i>L. major</i> | 63  | 226 | 288  |
| LmjF34.1470 | <i>L. major</i> | 57  | 320 | 376  |
| LmjF34.1480 | <i>L. major</i> | 347 | 1   | 347  |
| LmjF34.1480 | <i>L. major</i> | 367 | 421 | 787  |
| LmjF34.1480 | <i>L. major</i> | 100 | 818 | 917  |
| LmjF34.1480 | <i>L. major</i> | 59  | 948 | 1006 |
| LmjF34.1500 | <i>L. major</i> | 55  | 1   | 55   |
| LmjF34.1500 | <i>L. major</i> | 51  | 218 | 268  |
| LmjF34.1500 | <i>L. major</i> | 80  | 632 | 711  |
| LmjF34.1510 | <i>L. major</i> | 107 | 61  | 167  |
| LmjF34.1510 | <i>L. major</i> | 313 | 175 | 487  |
| LmjF34.1520 | <i>L. major</i> | 153 | 1   | 153  |
| LmjF34.1530 | <i>L. major</i> | 117 | 1   | 117  |
| LmjF34.1540 | <i>L. major</i> | 238 | 477 | 714  |
| LmjF34.1540 | <i>L. major</i> | 142 | 802 | 943  |
| LmjF34.1550 | <i>L. major</i> | 75  | 100 | 174  |
| LmjF34.1550 | <i>L. major</i> | 53  | 679 | 731  |
| LmjF34.1550 | <i>L. major</i> | 43  | 735 | 777  |
| LmjF34.1570 | <i>L. major</i> | 59  | 25  | 83   |
| LmjF34.1570 | <i>L. major</i> | 56  | 117 | 172  |
| LmjF34.1570 | <i>L. major</i> | 44  | 350 | 393  |
| LmjF34.1590 | <i>L. major</i> | 59  | 25  | 83   |
| LmjF34.1590 | <i>L. major</i> | 56  | 117 | 172  |
| LmjF34.1590 | <i>L. major</i> | 44  | 350 | 393  |
| LmjF34.1610 | <i>L. major</i> | 59  | 25  | 83   |
| LmjF34.1610 | <i>L. major</i> | 56  | 117 | 172  |
| LmjF34.1610 | <i>L. major</i> | 48  | 350 | 397  |
| LmjF34.1630 | <i>L. major</i> | 59  | 25  | 83   |
| LmjF34.1630 | <i>L. major</i> | 56  | 117 | 172  |
| LmjF34.1630 | <i>L. major</i> | 44  | 350 | 393  |
| LmjF34.1650 | <i>L. major</i> | 59  | 25  | 83   |
| LmjF34.1650 | <i>L. major</i> | 56  | 117 | 172  |
| LmjF34.1650 | <i>L. major</i> | 44  | 350 | 393  |
| LmjF34.1670 | <i>L. major</i> | 59  | 25  | 83   |
| LmjF34.1670 | <i>L. major</i> | 56  | 117 | 172  |
| LmjF34.1670 | <i>L. major</i> | 44  | 350 | 393  |
| LmjF34.1690 | <i>L. major</i> | 59  | 25  | 83   |

|             |                 |     |     |     |
|-------------|-----------------|-----|-----|-----|
| LmjF34.1690 | <i>L. major</i> | 56  | 117 | 172 |
| LmjF34.1690 | <i>L. major</i> | 44  | 350 | 393 |
| LmjF34.1710 | <i>L. major</i> | 59  | 25  | 83  |
| LmjF34.1710 | <i>L. major</i> | 56  | 117 | 172 |
| LmjF34.1710 | <i>L. major</i> | 44  | 350 | 393 |
| LmjF34.1730 | <i>L. major</i> | 59  | 25  | 83  |
| LmjF34.1730 | <i>L. major</i> | 56  | 117 | 172 |
| LmjF34.1730 | <i>L. major</i> | 44  | 350 | 393 |
| LmjF34.1750 | <i>L. major</i> | 59  | 25  | 83  |
| LmjF34.1750 | <i>L. major</i> | 56  | 117 | 172 |
| LmjF34.1750 | <i>L. major</i> | 44  | 350 | 393 |
| LmjF34.1770 | <i>L. major</i> | 59  | 25  | 83  |
| LmjF34.1770 | <i>L. major</i> | 56  | 117 | 172 |
| LmjF34.1770 | <i>L. major</i> | 44  | 350 | 393 |
| LmjF34.1790 | <i>L. major</i> | 59  | 25  | 83  |
| LmjF34.1790 | <i>L. major</i> | 56  | 117 | 172 |
| LmjF34.1790 | <i>L. major</i> | 44  | 350 | 393 |
| LmjF34.1810 | <i>L. major</i> | 59  | 25  | 83  |
| LmjF34.1810 | <i>L. major</i> | 56  | 117 | 172 |
| LmjF34.1810 | <i>L. major</i> | 44  | 350 | 393 |
| LmjF34.1830 | <i>L. major</i> | 59  | 25  | 83  |
| LmjF34.1830 | <i>L. major</i> | 56  | 117 | 172 |
| LmjF34.1830 | <i>L. major</i> | 44  | 350 | 393 |
| LmjF34.1850 | <i>L. major</i> | 59  | 25  | 83  |
| LmjF34.1850 | <i>L. major</i> | 56  | 117 | 172 |
| LmjF34.1850 | <i>L. major</i> | 44  | 350 | 393 |
| LmjF34.1870 | <i>L. major</i> | 59  | 25  | 83  |
| LmjF34.1870 | <i>L. major</i> | 56  | 117 | 172 |
| LmjF34.1870 | <i>L. major</i> | 44  | 350 | 393 |
| LmjF34.1890 | <i>L. major</i> | 59  | 25  | 83  |
| LmjF34.1890 | <i>L. major</i> | 56  | 117 | 172 |
| LmjF34.1890 | <i>L. major</i> | 45  | 350 | 394 |
| LmjF34.1910 | <i>L. major</i> | 59  | 25  | 83  |
| LmjF34.1910 | <i>L. major</i> | 56  | 117 | 172 |
| LmjF34.1910 | <i>L. major</i> | 44  | 350 | 393 |
| LmjF34.1930 | <i>L. major</i> | 59  | 25  | 83  |
| LmjF34.1930 | <i>L. major</i> | 56  | 117 | 172 |
| LmjF34.1930 | <i>L. major</i> | 44  | 350 | 393 |
| LmjF34.1950 | <i>L. major</i> | 59  | 25  | 83  |
| LmjF34.1950 | <i>L. major</i> | 56  | 117 | 172 |
| LmjF34.1950 | <i>L. major</i> | 44  | 350 | 393 |
| LmjF34.1970 | <i>L. major</i> | 59  | 25  | 83  |
| LmjF34.1970 | <i>L. major</i> | 56  | 117 | 172 |
| LmjF34.1970 | <i>L. major</i> | 44  | 350 | 393 |
| LmjF34.1990 | <i>L. major</i> | 44  | 75  | 118 |
| LmjF34.1990 | <i>L. major</i> | 140 | 199 | 338 |
| LmjF34.1990 | <i>L. major</i> | 239 | 436 | 674 |

|             |                 |     |      |      |
|-------------|-----------------|-----|------|------|
| LmjF34.2010 | <i>L. major</i> | 99  | 1    | 99   |
| LmjF34.2020 | <i>L. major</i> | 50  | 51   | 100  |
| LmjF34.2020 | <i>L. major</i> | 155 | 475  | 629  |
| LmjF34.2030 | <i>L. major</i> | 43  | 190  | 232  |
| LmjF34.2030 | <i>L. major</i> | 131 | 253  | 383  |
| LmjF34.2030 | <i>L. major</i> | 177 | 412  | 588  |
| LmjF34.2030 | <i>L. major</i> | 47  | 609  | 655  |
| LmjF34.2030 | <i>L. major</i> | 58  | 855  | 912  |
| LmjF34.2030 | <i>L. major</i> | 51  | 1076 | 1126 |
| LmjF34.2040 | <i>L. major</i> | 163 | 71   | 233  |
| LmjF34.2050 | <i>L. major</i> | 177 | 433  | 609  |
| LmjF34.2050 | <i>L. major</i> | 109 | 695  | 803  |
| LmjF34.2060 | <i>L. major</i> | 41  | 215  | 255  |
| LmjF34.2080 | <i>L. major</i> | 143 | 136  | 278  |
| LmjF34.2080 | <i>L. major</i> | 87  | 321  | 407  |
| LmjF34.2080 | <i>L. major</i> | 51  | 655  | 705  |
| LmjF34.2080 | <i>L. major</i> | 74  | 728  | 801  |
| LmjF34.2080 | <i>L. major</i> | 50  | 811  | 860  |
| LmjF34.2080 | <i>L. major</i> | 149 | 980  | 1128 |
| LmjF34.2080 | <i>L. major</i> | 46  | 1167 | 1212 |
| LmjF34.2080 | <i>L. major</i> | 41  | 1546 | 1586 |
| LmjF34.2080 | <i>L. major</i> | 48  | 1619 | 1666 |
| LmjF34.2080 | <i>L. major</i> | 59  | 1684 | 1742 |
| LmjF34.2080 | <i>L. major</i> | 90  | 1748 | 1837 |
| LmjF34.2090 | <i>L. major</i> | 47  | 1    | 47   |
| LmjF34.2100 | <i>L. major</i> | 84  | 151  | 234  |
| LmjF34.2100 | <i>L. major</i> | 145 | 394  | 538  |
| LmjF34.2110 | <i>L. major</i> | 48  | 49   | 96   |
| LmjF34.2110 | <i>L. major</i> | 98  | 323  | 420  |
| LmjF34.2110 | <i>L. major</i> | 108 | 431  | 538  |
| LmjF34.2120 | <i>L. major</i> | 46  | 261  | 306  |
| LmjF34.2150 | <i>L. major</i> | 44  | 220  | 263  |
| LmjF34.2150 | <i>L. major</i> | 49  | 303  | 351  |
| LmjF34.2150 | <i>L. major</i> | 41  | 404  | 444  |
| LmjF34.2150 | <i>L. major</i> | 68  | 470  | 537  |
| LmjF34.2150 | <i>L. major</i> | 238 | 667  | 904  |
| LmjF34.2150 | <i>L. major</i> | 46  | 1110 | 1155 |
| LmjF34.2150 | <i>L. major</i> | 205 | 1211 | 1415 |
| LmjF34.2160 | <i>L. major</i> | 129 | 41   | 169  |
| LmjF34.2170 | <i>L. major</i> | 41  | 64   | 104  |
| LmjF34.2170 | <i>L. major</i> | 50  | 270  | 319  |
| LmjF34.2170 | <i>L. major</i> | 72  | 460  | 531  |
| LmjF34.2180 | <i>L. major</i> | 75  | 780  | 854  |
| LmjF34.2180 | <i>L. major</i> | 72  | 1474 | 1545 |
| LmjF34.2180 | <i>L. major</i> | 72  | 1474 | 1545 |
| LmjF34.2190 | <i>L. major</i> | 51  | 687  | 737  |
| LmjF34.2190 | <i>L. major</i> | 89  | 905  | 993  |

|             |                 |     |      |      |
|-------------|-----------------|-----|------|------|
| LmjF34.2190 | <i>L. major</i> | 89  | 905  | 993  |
| LmjF34.2200 | <i>L. major</i> | 58  | 137  | 194  |
| LmjF34.2200 | <i>L. major</i> | 43  | 262  | 304  |
| LmjF34.2200 | <i>L. major</i> | 43  | 262  | 304  |
| LmjF34.2210 | <i>L. major</i> | 131 | 1    | 131  |
| LmjF34.2210 | <i>L. major</i> | 63  | 133  | 195  |
| LmjF34.2210 | <i>L. major</i> | 151 | 242  | 392  |
| LmjF34.2210 | <i>L. major</i> | 193 | 451  | 643  |
| LmjF34.2220 | <i>L. major</i> | 90  | 28   | 117  |
| LmjF34.2220 | <i>L. major</i> | 57  | 558  | 614  |
| LmjF34.2240 | <i>L. major</i> | 53  | 287  | 339  |
| LmjF34.2240 | <i>L. major</i> | 51  | 1124 | 1174 |
| LmjF34.2240 | <i>L. major</i> | 51  | 1124 | 1174 |
| LmjF34.2250 | <i>L. major</i> | 142 | 56   | 197  |
| LmjF34.2250 | <i>L. major</i> | 73  | 611  | 683  |
| LmjF34.2250 | <i>L. major</i> | 70  | 695  | 764  |
| LmjF34.2250 | <i>L. major</i> | 57  | 795  | 851  |
| LmjF34.2250 | <i>L. major</i> | 62  | 957  | 1018 |
| LmjF34.2250 | <i>L. major</i> | 340 | 1039 | 1378 |
| LmjF34.2250 | <i>L. major</i> | 137 | 1443 | 1579 |
| LmjF34.2250 | <i>L. major</i> | 72  | 1667 | 1738 |
| LmjF34.2250 | <i>L. major</i> | 118 | 1814 | 1931 |
| LmjF34.2260 | <i>L. major</i> | 61  | 44   | 104  |
| LmjF34.2270 | <i>L. major</i> | 148 | 394  | 541  |
| LmjF34.2280 | <i>L. major</i> | 43  | 49   | 91   |
| LmjF34.2280 | <i>L. major</i> | 62  | 268  | 329  |
| LmjF34.2280 | <i>L. major</i> | 59  | 547  | 605  |
| LmjF34.2280 | <i>L. major</i> | 98  | 636  | 733  |
| LmjF34.2290 | <i>L. major</i> | 47  | 110  | 156  |
| LmjF34.2290 | <i>L. major</i> | 50  | 282  | 331  |
| LmjF34.2290 | <i>L. major</i> | 50  | 282  | 331  |
| LmjF34.2300 | <i>L. major</i> | 75  | 15   | 89   |
| LmjF34.2340 | <i>L. major</i> | 184 | 56   | 239  |
| LmjF34.2360 | <i>L. major</i> | 151 | 1    | 151  |
| LmjF34.2360 | <i>L. major</i> | 78  | 167  | 244  |
| LmjF34.2360 | <i>L. major</i> | 182 | 251  | 432  |
| LmjF34.2370 | <i>L. major</i> | 183 | 1    | 183  |
| LmjF34.2370 | <i>L. major</i> | 99  | 267  | 365  |
| LmjF34.2380 | <i>L. major</i> | 154 | 1    | 154  |
| LmjF34.2380 | <i>L. major</i> | 186 | 176  | 361  |
| LmjF34.2390 | <i>L. major</i> | 50  | 1    | 50   |
| LmjF34.2390 | <i>L. major</i> | 85  | 82   | 166  |
| LmjF34.2390 | <i>L. major</i> | 85  | 82   | 166  |
| LmjF34.2410 | <i>L. major</i> | 54  | 13   | 66   |
| LmjF34.2430 | <i>L. major</i> | 67  | 1    | 67   |
| LmjF34.2430 | <i>L. major</i> | 69  | 96   | 164  |
| LmjF34.2430 | <i>L. major</i> | 125 | 229  | 353  |

|             |                 |      |      |      |
|-------------|-----------------|------|------|------|
| LmjF34.2430 | <i>L. major</i> | 52   | 416  | 467  |
| LmjF34.2430 | <i>L. major</i> | 48   | 761  | 808  |
| LmjF34.2450 | <i>L. major</i> | 63   | 43   | 105  |
| LmjF34.2450 | <i>L. major</i> | 48   | 430  | 477  |
| LmjF34.2450 | <i>L. major</i> | 130  | 534  | 663  |
| LmjF34.2450 | <i>L. major</i> | 43   | 1256 | 1298 |
| LmjF34.2450 | <i>L. major</i> | 56   | 1653 | 1708 |
| LmjF34.2460 | <i>L. major</i> | 219  | 1    | 219  |
| LmjF34.2460 | <i>L. major</i> | 57   | 321  | 377  |
| LmjF34.2460 | <i>L. major</i> | 88   | 414  | 501  |
| LmjF34.2476 | <i>L. major</i> | 171  | 1    | 171  |
| LmjF34.2476 | <i>L. major</i> | 84   | 294  | 377  |
| LmjF34.2479 | <i>L. major</i> | 88   | 195  | 282  |
| LmjF34.2480 | <i>L. major</i> | 504  | 111  | 614  |
| LmjF34.2480 | <i>L. major</i> | 62   | 738  | 799  |
| LmjF34.2480 | <i>L. major</i> | 213  | 857  | 1069 |
| LmjF34.2485 | <i>L. major</i> | 87   | 1    | 87   |
| LmjF34.2490 | <i>L. major</i> | 83   | 223  | 305  |
| LmjF34.2500 | <i>L. major</i> | 119  | 1    | 119  |
| LmjF34.2510 | <i>L. major</i> | 151  | 1    | 151  |
| LmjF34.2515 | <i>L. major</i> | 55   | 58   | 112  |
| LmjF34.2520 | <i>L. major</i> | 138  | 1    | 138  |
| LmjF34.2520 | <i>L. major</i> | 47   | 204  | 250  |
| LmjF34.2520 | <i>L. major</i> | 128  | 357  | 484  |
| LmjF34.2520 | <i>L. major</i> | 53   | 514  | 566  |
| LmjF34.2520 | <i>L. major</i> | 49   | 765  | 813  |
| LmjF34.2520 | <i>L. major</i> | 96   | 887  | 982  |
| LmjF34.2520 | <i>L. major</i> | 42   | 1141 | 1182 |
| LmjF34.2520 | <i>L. major</i> | 58   | 1442 | 1499 |
| LmjF34.2520 | <i>L. major</i> | 45   | 2151 | 2195 |
| LmjF34.2530 | <i>L. major</i> | 70   | 52   | 121  |
| LmjF34.2530 | <i>L. major</i> | 67   | 183  | 249  |
| LmjF34.2530 | <i>L. major</i> | 742  | 412  | 1153 |
| LmjF34.2530 | <i>L. major</i> | 1092 | 1241 | 2332 |
| LmjF34.2530 | <i>L. major</i> | 511  | 2420 | 2930 |
| LmjF34.2530 | <i>L. major</i> | 511  | 3018 | 3528 |
| LmjF34.2530 | <i>L. major</i> | 198  | 3616 | 3813 |
| LmjF34.2530 | <i>L. major</i> | 432  | 3883 | 4314 |
| LmjF34.2530 | <i>L. major</i> | 67   | 4329 | 4395 |
| LmjF34.2540 | <i>L. major</i> | 47   | 13   | 59   |
| LmjF34.2540 | <i>L. major</i> | 423  | 84   | 506  |
| LmjF34.2540 | <i>L. major</i> | 183  | 512  | 694  |
| LmjF34.2550 | <i>L. major</i> | 68   | 54   | 121  |
| LmjF34.2550 | <i>L. major</i> | 43   | 155  | 197  |
| LmjF34.2550 | <i>L. major</i> | 196  | 299  | 494  |
| LmjF34.2550 | <i>L. major</i> | 82   | 496  | 577  |
| LmjF34.2560 | <i>L. major</i> | 120  | 53   | 172  |



|             |                 |      |      |      |
|-------------|-----------------|------|------|------|
| LmjF34.2560 | <i>L. major</i> | 64   | 209  | 272  |
| LmjF34.2560 | <i>L. major</i> | 2577 | 282  | 2858 |
| LmjF34.2560 | <i>L. major</i> | 116  | 2913 | 3028 |
| LmjF34.2570 | <i>L. major</i> | 268  | 56   | 323  |
| LmjF34.2570 | <i>L. major</i> | 50   | 358  | 407  |
| LmjF34.2570 | <i>L. major</i> | 44   | 438  | 481  |
| LmjF34.2580 | <i>L. major</i> | 77   | 129  | 205  |
| LmjF34.2590 | <i>L. major</i> | 82   | 339  | 420  |
| LmjF34.2610 | <i>L. major</i> | 51   | 1    | 51   |
| LmjF34.2610 | <i>L. major</i> | 59   | 129  | 187  |
| LmjF34.2610 | <i>L. major</i> | 59   | 129  | 187  |
| LmjF34.2620 | <i>L. major</i> | 42   | 327  | 368  |
| LmjF34.2630 | <i>L. major</i> | 136  | 288  | 423  |
| LmjF34.2630 | <i>L. major</i> | 57   | 679  | 735  |
| LmjF34.2640 | <i>L. major</i> | 49   | 146  | 194  |
| LmjF34.2640 | <i>L. major</i> | 81   | 734  | 814  |
| LmjF34.2640 | <i>L. major</i> | 92   | 885  | 976  |
| LmjF34.2640 | <i>L. major</i> | 380  | 986  | 1365 |
| LmjF34.2660 | <i>L. major</i> | 68   | 289  | 356  |
| LmjF34.2660 | <i>L. major</i> | 69   | 645  | 713  |
| LmjF34.2660 | <i>L. major</i> | 99   | 749  | 847  |
| LmjF34.2680 | <i>L. major</i> | 40   | 79   | 118  |
| LmjF34.2680 | <i>L. major</i> | 93   | 280  | 372  |
| LmjF34.2680 | <i>L. major</i> | 44   | 451  | 494  |
| LmjF34.2690 | <i>L. major</i> | 251  | 34   | 284  |
| LmjF34.2690 | <i>L. major</i> | 256  | 316  | 571  |
| LmjF34.2700 | <i>L. major</i> | 42   | 1    | 42   |
| LmjF34.2700 | <i>L. major</i> | 108  | 83   | 190  |
| LmjF34.2710 | <i>L. major</i> | 99   | 1    | 99   |
| LmjF34.2720 | <i>L. major</i> | 125  | 256  | 380  |
| LmjF34.2720 | <i>L. major</i> | 56   | 629  | 684  |
| LmjF34.2720 | <i>L. major</i> | 56   | 629  | 684  |
| LmjF34.2730 | <i>L. major</i> | 51   | 369  | 419  |
| LmjF34.2740 | <i>L. major</i> | 40   | 13   | 52   |
| LmjF34.2740 | <i>L. major</i> | 102  | 83   | 184  |
| LmjF34.2750 | <i>L. major</i> | 53   | 136  | 188  |
| LmjF34.2750 | <i>L. major</i> | 123  | 305  | 427  |
| LmjF34.2760 | <i>L. major</i> | 51   | 60   | 110  |
| LmjF34.2760 | <i>L. major</i> | 45   | 257  | 301  |
| LmjF34.2765 | <i>L. major</i> | 156  | 1    | 156  |
| LmjF34.2765 | <i>L. major</i> | 160  | 184  | 343  |
| LmjF34.2770 | <i>L. major</i> | 68   | 109  | 176  |
| LmjF34.2770 | <i>L. major</i> | 43   | 279  | 321  |
| LmjF34.2770 | <i>L. major</i> | 47   | 371  | 417  |
| LmjF34.2790 | <i>L. major</i> | 62   | 83   | 144  |
| LmjF34.2790 | <i>L. major</i> | 45   | 355  | 399  |
| LmjF34.2790 | <i>L. major</i> | 48   | 553  | 600  |

|             |                 |     |     |     |
|-------------|-----------------|-----|-----|-----|
| LmjF34.2810 | <i>L. major</i> | 86  | 151 | 236 |
| LmjF34.2810 | <i>L. major</i> | 64  | 279 | 342 |
| LmjF34.2810 | <i>L. major</i> | 79  | 758 | 836 |
| LmjF34.2820 | <i>L. major</i> | 118 | 36  | 153 |
| LmjF34.2820 | <i>L. major</i> | 171 | 186 | 356 |
| LmjF34.2820 | <i>L. major</i> | 59  | 590 | 648 |
| LmjF34.2840 | <i>L. major</i> | 45  | 610 | 654 |
| LmjF34.2850 | <i>L. major</i> | 66  | 126 | 191 |
| LmjF34.2870 | <i>L. major</i> | 42  | 1   | 42  |
| LmjF34.2870 | <i>L. major</i> | 87  | 333 | 419 |
| LmjF34.2870 | <i>L. major</i> | 87  | 333 | 419 |
| LmjF34.2880 | <i>L. major</i> | 42  | 1   | 42  |
| LmjF34.2880 | <i>L. major</i> | 87  | 333 | 419 |
| LmjF34.2880 | <i>L. major</i> | 87  | 333 | 419 |
| LmjF34.2890 | <i>L. major</i> | 42  | 1   | 42  |
| LmjF34.2890 | <i>L. major</i> | 87  | 333 | 419 |
| LmjF34.2890 | <i>L. major</i> | 87  | 333 | 419 |
| LmjF34.2900 | <i>L. major</i> | 42  | 1   | 42  |
| LmjF34.2900 | <i>L. major</i> | 87  | 333 | 419 |
| LmjF34.2900 | <i>L. major</i> | 87  | 333 | 419 |
| LmjF34.2910 | <i>L. major</i> | 40  | 393 | 432 |
| LmjF34.2930 | <i>L. major</i> | 57  | 58  | 114 |
| LmjF34.2940 | <i>L. major</i> | 41  | 1   | 41  |
| LmjF34.2940 | <i>L. major</i> | 44  | 199 | 242 |
| LmjF34.2940 | <i>L. major</i> | 44  | 199 | 242 |
| LmjF34.2960 | <i>L. major</i> | 54  | 167 | 220 |
| LmjF34.2970 | <i>L. major</i> | 103 | 80  | 182 |
| LmjF34.2990 | <i>L. major</i> | 95  | 106 | 200 |
| LmjF34.3000 | <i>L. major</i> | 95  | 1   | 95  |
| LmjF34.3000 | <i>L. major</i> | 111 | 172 | 282 |
| LmjF34.3000 | <i>L. major</i> | 86  | 284 | 369 |
| LmjF34.3000 | <i>L. major</i> | 56  | 375 | 430 |
| LmjF34.3000 | <i>L. major</i> | 148 | 441 | 588 |
| LmjF34.3010 | <i>L. major</i> | 41  | 209 | 249 |
| LmjF34.3020 | <i>L. major</i> | 267 | 29  | 295 |
| LmjF34.3020 | <i>L. major</i> | 43  | 328 | 370 |
| LmjF34.3020 | <i>L. major</i> | 324 | 617 | 940 |
| LmjF34.3030 | <i>L. major</i> | 148 | 1   | 148 |
| LmjF34.3040 | <i>L. major</i> | 55  | 103 | 157 |
| LmjF34.3040 | <i>L. major</i> | 75  | 195 | 269 |
| LmjF34.3040 | <i>L. major</i> | 41  | 380 | 420 |
| LmjF34.3060 | <i>L. major</i> | 79  | 60  | 138 |
| LmjF34.3070 | <i>L. major</i> | 112 | 1   | 112 |
| LmjF34.3070 | <i>L. major</i> | 49  | 180 | 228 |
| LmjF34.3080 | <i>L. major</i> | 81  | 70  | 150 |
| LmjF34.3080 | <i>L. major</i> | 168 | 575 | 742 |
| LmjF34.3090 | <i>L. major</i> | 58  | 1   | 58  |

|             |                 |     |      |      |
|-------------|-----------------|-----|------|------|
| LmjF34.3090 | <i>L. major</i> | 147 | 75   | 221  |
| LmjF34.3090 | <i>L. major</i> | 40  | 430  | 469  |
| LmjF34.3110 | <i>L. major</i> | 49  | 57   | 105  |
| LmjF34.3140 | <i>L. major</i> | 50  | 1    | 50   |
| LmjF34.3140 | <i>L. major</i> | 74  | 182  | 255  |
| LmjF34.3150 | <i>L. major</i> | 83  | 1    | 83   |
| LmjF34.3160 | <i>L. major</i> | 63  | 1    | 63   |
| LmjF34.3160 | <i>L. major</i> | 168 | 100  | 267  |
| LmjF34.3170 | <i>L. major</i> | 149 | 94   | 242  |
| LmjF34.3170 | <i>L. major</i> | 175 | 259  | 433  |
| LmjF34.3170 | <i>L. major</i> | 175 | 259  | 433  |
| LmjF34.3180 | <i>L. major</i> | 194 | 45   | 238  |
| LmjF34.3180 | <i>L. major</i> | 137 | 268  | 404  |
| LmjF34.3190 | <i>L. major</i> | 77  | 33   | 109  |
| LmjF34.3190 | <i>L. major</i> | 54  | 433  | 486  |
| LmjF34.3190 | <i>L. major</i> | 54  | 433  | 486  |
| LmjF34.3200 | <i>L. major</i> | 41  | 171  | 211  |
| LmjF34.3200 | <i>L. major</i> | 212 | 807  | 1018 |
| LmjF34.3220 | <i>L. major</i> | 46  | 1    | 46   |
| LmjF34.3230 | <i>L. major</i> | 53  | 47   | 99   |
| LmjF34.3230 | <i>L. major</i> | 48  | 242  | 289  |
| LmjF34.3230 | <i>L. major</i> | 117 | 398  | 514  |
| LmjF34.3230 | <i>L. major</i> | 67  | 666  | 732  |
| LmjF34.3230 | <i>L. major</i> | 44  | 868  | 911  |
| LmjF34.3230 | <i>L. major</i> | 80  | 1264 | 1343 |
| LmjF34.3260 | <i>L. major</i> | 104 | 281  | 384  |
| LmjF34.3260 | <i>L. major</i> | 140 | 525  | 664  |
| LmjF34.3260 | <i>L. major</i> | 140 | 525  | 664  |
| LmjF34.3270 | <i>L. major</i> | 64  | 121  | 184  |
| LmjF34.3280 | <i>L. major</i> | 40  | 100  | 139  |
| LmjF34.3280 | <i>L. major</i> | 110 | 248  | 357  |
| LmjF34.3280 | <i>L. major</i> | 60  | 418  | 477  |
| LmjF34.3310 | <i>L. major</i> | 60  | 32   | 91   |
| LmjF34.3320 | <i>L. major</i> | 42  | 1    | 42   |
| LmjF34.3340 | <i>L. major</i> | 71  | 10   | 80   |
| LmjF34.3340 | <i>L. major</i> | 74  | 98   | 171  |
| LmjF34.3340 | <i>L. major</i> | 64  | 337  | 400  |
| LmjF34.3340 | <i>L. major</i> | 71  | 465  | 535  |
| LmjF34.3350 | <i>L. major</i> | 40  | 100  | 139  |
| LmjF34.3350 | <i>L. major</i> | 116 | 385  | 500  |
| LmjF34.3350 | <i>L. major</i> | 116 | 385  | 500  |
| LmjF34.3390 | <i>L. major</i> | 60  | 223  | 282  |
| LmjF34.3390 | <i>L. major</i> | 82  | 374  | 455  |
| LmjF34.3390 | <i>L. major</i> | 44  | 686  | 729  |
| LmjF34.3400 | <i>L. major</i> | 60  | 248  | 307  |
| LmjF34.3420 | <i>L. major</i> | 41  | 403  | 443  |
| LmjF34.3430 | <i>L. major</i> | 41  | 550  | 590  |

|             |                 |     |      |      |
|-------------|-----------------|-----|------|------|
| LmjF34.3440 | <i>L. major</i> | 178 | 457  | 634  |
| LmjF34.3450 | <i>L. major</i> | 50  | 65   | 114  |
| LmjF34.3450 | <i>L. major</i> | 121 | 311  | 431  |
| LmjF34.3450 | <i>L. major</i> | 143 | 506  | 648  |
| LmjF34.3450 | <i>L. major</i> | 91  | 788  | 878  |
| LmjF34.3450 | <i>L. major</i> | 174 | 899  | 1072 |
| LmjF34.3450 | <i>L. major</i> | 59  | 1120 | 1178 |
| LmjF34.3460 | <i>L. major</i> | 50  | 319  | 368  |
| LmjF34.3480 | <i>L. major</i> | 52  | 1    | 52   |
| LmjF34.3490 | <i>L. major</i> | 43  | 30   | 72   |
| LmjF34.3520 | <i>L. major</i> | 45  | 307  | 351  |
| LmjF34.3530 | <i>L. major</i> | 57  | 1356 | 1412 |
| LmjF34.3530 | <i>L. major</i> | 50  | 1896 | 1945 |
| LmjF34.3530 | <i>L. major</i> | 50  | 1896 | 1945 |
| LmjF34.3550 | <i>L. major</i> | 242 | 99   | 340  |
| LmjF34.3560 | <i>L. major</i> | 148 | 194  | 341  |
| LmjF34.3570 | <i>L. major</i> | 420 | 47   | 466  |
| LmjF34.3570 | <i>L. major</i> | 191 | 505  | 695  |
| LmjF34.3570 | <i>L. major</i> | 226 | 716  | 941  |
| LmjF34.3580 | <i>L. major</i> | 67  | 65   | 131  |
| LmjF34.3590 | <i>L. major</i> | 51  | 120  | 170  |
| LmjF34.3590 | <i>L. major</i> | 64  | 260  | 323  |
| LmjF34.3590 | <i>L. major</i> | 64  | 260  | 323  |
| LmjF34.3640 | <i>L. major</i> | 78  | 85   | 162  |
| LmjF34.3690 | <i>L. major</i> | 73  | 1    | 73   |
| LmjF34.3690 | <i>L. major</i> | 53  | 222  | 274  |
| LmjF34.3690 | <i>L. major</i> | 40  | 394  | 433  |
| LmjF34.3690 | <i>L. major</i> | 80  | 515  | 594  |
| LmjF34.3690 | <i>L. major</i> | 49  | 1015 | 1063 |
| LmjF34.3690 | <i>L. major</i> | 52  | 1168 | 1219 |
| LmjF34.3690 | <i>L. major</i> | 65  | 1246 | 1310 |
| LmjF34.3710 | <i>L. major</i> | 127 | 46   | 172  |
| LmjF34.3730 | <i>L. major</i> | 63  | 1    | 63   |
| LmjF34.3745 | <i>L. major</i> | 60  | 103  | 162  |
| LmjF34.3745 | <i>L. major</i> | 246 | 169  | 414  |
| LmjF34.3745 | <i>L. major</i> | 70  | 430  | 499  |
| LmjF34.3750 | <i>L. major</i> | 131 | 1    | 131  |
| LmjF34.3750 | <i>L. major</i> | 48  | 279  | 326  |
| LmjF34.3750 | <i>L. major</i> | 93  | 346  | 438  |
| LmjF34.3760 | <i>L. major</i> | 60  | 47   | 106  |
| LmjF34.3770 | <i>L. major</i> | 56  | 1    | 56   |
| LmjF34.3770 | <i>L. major</i> | 95  | 105  | 199  |
| LmjF34.3770 | <i>L. major</i> | 95  | 105  | 199  |
| LmjF34.3790 | <i>L. major</i> | 68  | 642  | 709  |
| LmjF34.3790 | <i>L. major</i> | 50  | 931  | 980  |
| LmjF34.3790 | <i>L. major</i> | 44  | 1054 | 1097 |
| LmjF34.3820 | <i>L. major</i> | 74  | 1    | 74   |

|             |                 |     |      |      |
|-------------|-----------------|-----|------|------|
| LmjF34.3820 | <i>L. major</i> | 50  | 108  | 157  |
| LmjF34.3820 | <i>L. major</i> | 56  | 234  | 289  |
| LmjF34.3830 | <i>L. major</i> | 208 | 26   | 233  |
| LmjF34.3870 | <i>L. major</i> | 121 | 113  | 233  |
| LmjF34.3870 | <i>L. major</i> | 89  | 638  | 726  |
| LmjF34.3870 | <i>L. major</i> | 89  | 638  | 726  |
| LmjF34.3880 | <i>L. major</i> | 50  | 2590 | 2639 |
| LmjF34.3880 | <i>L. major</i> | 84  | 3194 | 3277 |
| LmjF34.3880 | <i>L. major</i> | 65  | 3400 | 3464 |
| LmjF34.3880 | <i>L. major</i> | 42  | 3759 | 3800 |
| LmjF34.3900 | <i>L. major</i> | 88  | 120  | 207  |
| LmjF34.3920 | <i>L. major</i> | 74  | 84   | 157  |
| LmjF34.3920 | <i>L. major</i> | 59  | 322  | 380  |
| LmjF34.3920 | <i>L. major</i> | 59  | 322  | 380  |
| LmjF34.3940 | <i>L. major</i> | 140 | 2437 | 2576 |
| LmjF34.3950 | <i>L. major</i> | 162 | 1    | 162  |
| LmjF34.3950 | <i>L. major</i> | 40  | 231  | 270  |
| LmjF34.3960 | <i>L. major</i> | 53  | 224  | 276  |
| LmjF34.3960 | <i>L. major</i> | 45  | 606  | 650  |
| LmjF34.3970 | <i>L. major</i> | 92  | 611  | 702  |
| LmjF34.3990 | <i>L. major</i> | 44  | 235  | 278  |
| LmjF34.4020 | <i>L. major</i> | 42  | 1    | 42   |
| LmjF34.4040 | <i>L. major</i> | 44  | 43   | 86   |
| LmjF34.4050 | <i>L. major</i> | 62  | 1    | 62   |
| LmjF34.4050 | <i>L. major</i> | 72  | 112  | 183  |
| LmjF34.4050 | <i>L. major</i> | 73  | 583  | 655  |
| LmjF34.4070 | <i>L. major</i> | 75  | 1    | 75   |
| LmjF34.4090 | <i>L. major</i> | 308 | 62   | 369  |
| LmjF34.4100 | <i>L. major</i> | 47  | 21   | 67   |
| LmjF34.4100 | <i>L. major</i> | 43  | 131  | 173  |
| LmjF34.4100 | <i>L. major</i> | 43  | 131  | 173  |
| LmjF34.4110 | <i>L. major</i> | 57  | 655  | 711  |
| LmjF34.4110 | <i>L. major</i> | 50  | 964  | 1013 |
| LmjF34.4110 | <i>L. major</i> | 43  | 1263 | 1305 |
| LmjF34.4110 | <i>L. major</i> | 46  | 2034 | 2079 |
| LmjF34.4140 | <i>L. major</i> | 108 | 1    | 108  |
| LmjF34.4140 | <i>L. major</i> | 208 | 127  | 334  |
| LmjF34.4140 | <i>L. major</i> | 87  | 366  | 452  |
| LmjF34.4150 | <i>L. major</i> | 45  | 421  | 465  |
| LmjF34.4160 | <i>L. major</i> | 93  | 999  | 1091 |
| LmjF34.4160 | <i>L. major</i> | 109 | 2833 | 2941 |
| LmjF34.4160 | <i>L. major</i> | 72  | 3046 | 3117 |
| LmjF34.4160 | <i>L. major</i> | 79  | 3348 | 3426 |
| LmjF34.4170 | <i>L. major</i> | 101 | 1    | 101  |
| LmjF34.4170 | <i>L. major</i> | 87  | 128  | 214  |
| LmjF34.4180 | <i>L. major</i> | 97  | 56   | 152  |
| LmjF34.4210 | <i>L. major</i> | 281 | 84   | 364  |

|             |                 |     |      |      |
|-------------|-----------------|-----|------|------|
| LmjF34.4210 | <i>L. major</i> | 81  | 408  | 488  |
| LmjF34.4240 | <i>L. major</i> | 135 | 111  | 245  |
| LmjF34.4250 | <i>L. major</i> | 94  | 18   | 111  |
| LmjF34.4250 | <i>L. major</i> | 66  | 205  | 270  |
| LmjF34.4260 | <i>L. major</i> | 46  | 1    | 46   |
| LmjF34.4260 | <i>L. major</i> | 42  | 286  | 327  |
| LmjF34.4260 | <i>L. major</i> | 181 | 428  | 608  |
| LmjF34.4260 | <i>L. major</i> | 167 | 653  | 819  |
| LmjF34.4270 | <i>L. major</i> | 44  | 1    | 44   |
| LmjF34.4280 | <i>L. major</i> | 71  | 292  | 362  |
| LmjF34.4290 | <i>L. major</i> | 63  | 1    | 63   |
| LmjF34.4290 | <i>L. major</i> | 107 | 114  | 220  |
| LmjF34.4310 | <i>L. major</i> | 49  | 818  | 866  |
| LmjF34.4310 | <i>L. major</i> | 47  | 1085 | 1131 |
| LmjF34.4310 | <i>L. major</i> | 47  | 1085 | 1131 |
| LmjF34.4530 | <i>L. major</i> | 88  | 1338 | 1425 |
| LmjF34.4530 | <i>L. major</i> | 46  | 2321 | 2366 |
| LmjF34.4530 | <i>L. major</i> | 46  | 2321 | 2366 |
| LmjF34.4540 | <i>L. major</i> | 91  | 18   | 108  |
| LmjF34.4550 | <i>L. major</i> | 77  | 1    | 77   |
| LmjF34.4560 | <i>L. major</i> | 40  | 1    | 40   |
| LmjF34.4560 | <i>L. major</i> | 146 | 181  | 326  |
| LmjF34.4600 | <i>L. major</i> | 113 | 1    | 113  |
| LmjF34.4610 | <i>L. major</i> | 47  | 332  | 378  |
| LmjF34.4610 | <i>L. major</i> | 96  | 398  | 493  |
| LmjF34.4610 | <i>L. major</i> | 96  | 398  | 493  |
| LmjF35.0010 | <i>L. major</i> | 90  | 1    | 90   |
| LmjF35.0010 | <i>L. major</i> | 54  | 133  | 186  |
| LmjF35.0050 | <i>L. major</i> | 45  | 1    | 45   |
| LmjF35.0060 | <i>L. major</i> | 497 | 174  | 670  |
| LmjF35.0070 | <i>L. major</i> | 41  | 194  | 234  |
| LmjF35.0080 | <i>L. major</i> | 40  | 1    | 40   |
| LmjF35.0090 | <i>L. major</i> | 147 | 29   | 175  |
| LmjF35.0090 | <i>L. major</i> | 68  | 184  | 251  |
| LmjF35.0090 | <i>L. major</i> | 68  | 184  | 251  |
| LmjF35.0170 | <i>L. major</i> | 118 | 52   | 169  |
| LmjF35.0170 | <i>L. major</i> | 54  | 224  | 277  |
| LmjF35.0170 | <i>L. major</i> | 54  | 224  | 277  |
| LmjF35.0180 | <i>L. major</i> | 73  | 39   | 111  |
| LmjF35.0180 | <i>L. major</i> | 345 | 124  | 468  |
| LmjF35.0180 | <i>L. major</i> | 53  | 487  | 539  |
| LmjF35.0180 | <i>L. major</i> | 219 | 560  | 778  |
| LmjF35.0180 | <i>L. major</i> | 82  | 805  | 886  |
| LmjF35.0200 | <i>L. major</i> | 331 | 69   | 399  |
| LmjF35.0200 | <i>L. major</i> | 52  | 467  | 518  |
| LmjF35.0200 | <i>L. major</i> | 53  | 520  | 572  |
| LmjF35.0200 | <i>L. major</i> | 56  | 611  | 666  |

|             |                 |     |      |      |
|-------------|-----------------|-----|------|------|
| LmjF35.0200 | <i>L. major</i> | 155 | 733  | 887  |
| LmjF35.0200 | <i>L. major</i> | 92  | 933  | 1024 |
| LmjF35.0200 | <i>L. major</i> | 87  | 1214 | 1300 |
| LmjF35.0200 | <i>L. major</i> | 181 | 1329 | 1509 |
| LmjF35.0200 | <i>L. major</i> | 164 | 1554 | 1717 |
| LmjF35.0200 | <i>L. major</i> | 159 | 1766 | 1924 |
| LmjF35.0200 | <i>L. major</i> | 178 | 1946 | 2123 |
| LmjF35.0220 | <i>L. major</i> | 104 | 160  | 263  |
| LmjF35.0230 | <i>L. major</i> | 83  | 110  | 192  |
| LmjF35.0230 | <i>L. major</i> | 65  | 283  | 347  |
| LmjF35.0250 | <i>L. major</i> | 57  | 121  | 177  |
| LmjF35.0250 | <i>L. major</i> | 139 | 307  | 445  |
| LmjF35.0250 | <i>L. major</i> | 48  | 670  | 717  |
| LmjF35.0260 | <i>L. major</i> | 59  | 233  | 291  |
| LmjF35.0260 | <i>L. major</i> | 44  | 433  | 476  |
| LmjF35.0260 | <i>L. major</i> | 44  | 433  | 476  |
| LmjF35.0290 | <i>L. major</i> | 638 | 27   | 664  |
| LmjF35.0290 | <i>L. major</i> | 115 | 672  | 786  |
| LmjF35.0290 | <i>L. major</i> | 41  | 1081 | 1121 |
| LmjF35.0300 | <i>L. major</i> | 100 | 36   | 135  |
| LmjF35.0300 | <i>L. major</i> | 97  | 157  | 253  |
| LmjF35.0310 | <i>L. major</i> | 64  | 302  | 365  |
| LmjF35.0320 | <i>L. major</i> | 45  | 1    | 45   |
| LmjF35.0340 | <i>L. major</i> | 42  | 162  | 203  |
| LmjF35.0340 | <i>L. major</i> | 43  | 327  | 369  |
| LmjF35.0340 | <i>L. major</i> | 43  | 327  | 369  |
| LmjF35.0350 | <i>L. major</i> | 43  | 160  | 202  |
| LmjF35.0350 | <i>L. major</i> | 88  | 438  | 525  |
| LmjF35.0350 | <i>L. major</i> | 88  | 438  | 525  |
| LmjF35.0370 | <i>L. major</i> | 59  | 1    | 59   |
| LmjF35.0380 | <i>L. major</i> | 187 | 1    | 187  |
| LmjF35.0380 | <i>L. major</i> | 119 | 229  | 347  |
| LmjF35.0380 | <i>L. major</i> | 44  | 388  | 431  |
| LmjF35.0380 | <i>L. major</i> | 40  | 557  | 596  |
| LmjF35.0390 | <i>L. major</i> | 103 | 36   | 138  |
| LmjF35.0390 | <i>L. major</i> | 52  | 161  | 212  |
| LmjF35.0390 | <i>L. major</i> | 41  | 325  | 365  |
| LmjF35.0390 | <i>L. major</i> | 60  | 451  | 510  |
| LmjF35.0430 | <i>L. major</i> | 66  | 1    | 66   |
| LmjF35.0430 | <i>L. major</i> | 63  | 103  | 165  |
| LmjF35.0430 | <i>L. major</i> | 171 | 205  | 375  |
| LmjF35.0440 | <i>L. major</i> | 56  | 255  | 310  |
| LmjF35.0440 | <i>L. major</i> | 59  | 346  | 404  |
| LmjF35.0450 | <i>L. major</i> | 85  | 64   | 148  |
| LmjF35.0450 | <i>L. major</i> | 93  | 360  | 452  |
| LmjF35.0460 | <i>L. major</i> | 222 | 696  | 917  |
| LmjF35.0470 | <i>L. major</i> | 85  | 41   | 125  |

|             |                 |       |       |       |
|-------------|-----------------|-------|-------|-------|
| LmjF35.0490 | <i>L. major</i> | 412   | 277   | 688   |
| LmjF35.0490 | <i>L. major</i> | 140   | 783   | 922   |
| LmjF35.0490 | <i>L. major</i> | 98    | 1096  | 1193  |
| LmjF35.0490 | <i>L. major</i> | 294   | 1284  | 1577  |
| LmjF35.0500 | <i>L. major</i> | 72    | 161   | 232   |
| LmjF35.0500 | <i>L. major</i> | 585   | 645   | 1229  |
| LmjF35.0520 | <i>L. major</i> | 6693  | 296   | 6988  |
| LmjF35.0540 | <i>L. major</i> | 11167 | 296   | 11462 |
| LmjF35.0540 | <i>L. major</i> | 45    | 11613 | 11657 |
| LmjF35.0540 | <i>L. major</i> | 5457  | 11729 | 17185 |
| LmjF35.0550 | <i>L. major</i> | 46    | 489   | 534   |
| LmjF35.0550 | <i>L. major</i> | 1703  | 598   | 2300  |
| LmjF35.0560 | <i>L. major</i> | 358   | 1     | 358   |
| LmjF35.0560 | <i>L. major</i> | 91    | 387   | 477   |
| LmjF35.0560 | <i>L. major</i> | 159   | 502   | 660   |
| LmjF35.0560 | <i>L. major</i> | 47    | 690   | 736   |
| LmjF35.0570 | <i>L. major</i> | 61    | 147   | 207   |
| LmjF35.0570 | <i>L. major</i> | 49    | 422   | 470   |
| LmjF35.0570 | <i>L. major</i> | 67    | 513   | 579   |
| LmjF35.0570 | <i>L. major</i> | 437   | 1344  | 1780  |
| LmjF35.0570 | <i>L. major</i> | 143   | 1977  | 2119  |
| LmjF35.0580 | <i>L. major</i> | 224   | 1     | 224   |
| LmjF35.0590 | <i>L. major</i> | 94    | 257   | 350   |
| LmjF35.0590 | <i>L. major</i> | 49    | 371   | 419   |
| LmjF35.0590 | <i>L. major</i> | 65    | 623   | 687   |
| LmjF35.0610 | <i>L. major</i> | 63    | 23    | 85    |
| LmjF35.0610 | <i>L. major</i> | 108   | 135   | 242   |
| LmjF35.0610 | <i>L. major</i> | 98    | 433   | 530   |
| LmjF35.0610 | <i>L. major</i> | 52    | 638   | 689   |
| LmjF35.0610 | <i>L. major</i> | 87    | 858   | 944   |
| LmjF35.0610 | <i>L. major</i> | 43    | 1000  | 1042  |
| LmjF35.0610 | <i>L. major</i> | 59    | 1087  | 1145  |
| LmjF35.0610 | <i>L. major</i> | 53    | 1149  | 1201  |
| LmjF35.0610 | <i>L. major</i> | 40    | 1290  | 1329  |
| LmjF35.0610 | <i>L. major</i> | 51    | 1712  | 1762  |
| LmjF35.0610 | <i>L. major</i> | 43    | 1826  | 1868  |
| LmjF35.0610 | <i>L. major</i> | 57    | 2054  | 2110  |
| LmjF35.0610 | <i>L. major</i> | 45    | 2141  | 2185  |
| LmjF35.0610 | <i>L. major</i> | 58    | 2304  | 2361  |
| LmjF35.0610 | <i>L. major</i> | 86    | 2421  | 2506  |
| LmjF35.0630 | <i>L. major</i> | 74    | 1     | 74    |
| LmjF35.0630 | <i>L. major</i> | 121   | 199   | 319   |
| LmjF35.0630 | <i>L. major</i> | 41    | 404   | 444   |
| LmjF35.0640 | <i>L. major</i> | 54    | 433   | 486   |
| LmjF35.0660 | <i>L. major</i> | 91    | 1     | 91    |
| LmjF35.0660 | <i>L. major</i> | 68    | 171   | 238   |
| LmjF35.0660 | <i>L. major</i> | 260   | 280   | 539   |



|             |                 |     |      |      |
|-------------|-----------------|-----|------|------|
| LmjF35.0660 | <i>L. major</i> | 131 | 556  | 686  |
| LmjF35.0660 | <i>L. major</i> | 49  | 741  | 789  |
| LmjF35.0660 | <i>L. major</i> | 87  | 822  | 908  |
| LmjF35.0660 | <i>L. major</i> | 100 | 1169 | 1268 |
| LmjF35.0670 | <i>L. major</i> | 50  | 273  | 322  |
| LmjF35.0670 | <i>L. major</i> | 48  | 489  | 536  |
| LmjF35.0670 | <i>L. major</i> | 67  | 713  | 779  |
| LmjF35.0670 | <i>L. major</i> | 81  | 818  | 898  |
| LmjF35.0670 | <i>L. major</i> | 55  | 940  | 994  |
| LmjF35.0670 | <i>L. major</i> | 43  | 1017 | 1059 |
| LmjF35.0670 | <i>L. major</i> | 49  | 1061 | 1109 |
| LmjF35.0670 | <i>L. major</i> | 50  | 1315 | 1364 |
| LmjF35.0670 | <i>L. major</i> | 50  | 1706 | 1755 |
| LmjF35.0670 | <i>L. major</i> | 107 | 2141 | 2247 |
| LmjF35.0670 | <i>L. major</i> | 42  | 2674 | 2715 |
| LmjF35.0670 | <i>L. major</i> | 93  | 2875 | 2967 |
| LmjF35.0670 | <i>L. major</i> | 112 | 3259 | 3370 |
| LmjF35.0670 | <i>L. major</i> | 42  | 3822 | 3863 |
| LmjF35.0670 | <i>L. major</i> | 52  | 4070 | 4121 |
| LmjF35.0670 | <i>L. major</i> | 48  | 4127 | 4174 |
| LmjF35.0680 | <i>L. major</i> | 433 | 1    | 433  |
| LmjF35.0680 | <i>L. major</i> | 231 | 454  | 684  |
| LmjF35.0680 | <i>L. major</i> | 246 | 694  | 939  |
| LmjF35.0680 | <i>L. major</i> | 155 | 971  | 1125 |
| LmjF35.0680 | <i>L. major</i> | 100 | 1155 | 1254 |
| LmjF35.0680 | <i>L. major</i> | 71  | 1265 | 1335 |
| LmjF35.0680 | <i>L. major</i> | 76  | 1435 | 1510 |
| LmjF35.0690 | <i>L. major</i> | 41  | 582  | 622  |
| LmjF35.0700 | <i>L. major</i> | 63  | 214  | 276  |
| LmjF35.0710 | <i>L. major</i> | 48  | 108  | 155  |
| LmjF35.0720 | <i>L. major</i> | 49  | 385  | 433  |
| LmjF35.0720 | <i>L. major</i> | 43  | 459  | 501  |
| LmjF35.0720 | <i>L. major</i> | 43  | 459  | 501  |
| LmjF35.0730 | <i>L. major</i> | 225 | 1    | 225  |
| LmjF35.0730 | <i>L. major</i> | 43  | 256  | 298  |
| LmjF35.0730 | <i>L. major</i> | 58  | 480  | 537  |
| LmjF35.0730 | <i>L. major</i> | 71  | 659  | 729  |
| LmjF35.0740 | <i>L. major</i> | 83  | 225  | 307  |
| LmjF35.0740 | <i>L. major</i> | 59  | 388  | 446  |
| LmjF35.0740 | <i>L. major</i> | 165 | 482  | 646  |
| LmjF35.0740 | <i>L. major</i> | 107 | 656  | 762  |
| LmjF35.0740 | <i>L. major</i> | 167 | 765  | 931  |
| LmjF35.0750 | <i>L. major</i> | 57  | 114  | 170  |
| LmjF35.0760 | <i>L. major</i> | 70  | 221  | 290  |
| LmjF35.0770 | <i>L. major</i> | 97  | 152  | 248  |
| LmjF35.0780 | <i>L. major</i> | 208 | 100  | 307  |
| LmjF35.0780 | <i>L. major</i> | 40  | 359  | 398  |

|             |                 |     |      |      |
|-------------|-----------------|-----|------|------|
| LmjF35.0780 | <i>L. major</i> | 89  | 400  | 488  |
| LmjF35.0780 | <i>L. major</i> | 268 | 512  | 779  |
| LmjF35.0790 | <i>L. major</i> | 80  | 1    | 80   |
| LmjF35.0790 | <i>L. major</i> | 62  | 125  | 186  |
| LmjF35.0790 | <i>L. major</i> | 115 | 265  | 379  |
| LmjF35.0800 | <i>L. major</i> | 105 | 61   | 165  |
| LmjF35.0800 | <i>L. major</i> | 133 | 217  | 349  |
| LmjF35.0800 | <i>L. major</i> | 187 | 392  | 578  |
| LmjF35.0800 | <i>L. major</i> | 189 | 590  | 778  |
| LmjF35.0800 | <i>L. major</i> | 79  | 792  | 870  |
| LmjF35.0800 | <i>L. major</i> | 108 | 908  | 1015 |
| LmjF35.0810 | <i>L. major</i> | 156 | 1    | 156  |
| LmjF35.0810 | <i>L. major</i> | 212 | 166  | 377  |
| LmjF35.0810 | <i>L. major</i> | 684 | 388  | 1071 |
| LmjF35.0810 | <i>L. major</i> | 60  | 1104 | 1163 |
| LmjF35.0810 | <i>L. major</i> | 114 | 1168 | 1281 |
| LmjF35.0810 | <i>L. major</i> | 97  | 1286 | 1382 |
| LmjF35.0810 | <i>L. major</i> | 81  | 1409 | 1489 |
| LmjF35.0840 | <i>L. major</i> | 47  | 1    | 47   |
| LmjF35.0840 | <i>L. major</i> | 67  | 60   | 126  |
| LmjF35.0840 | <i>L. major</i> | 67  | 60   | 126  |
| LmjF35.0860 | <i>L. major</i> | 110 | 52   | 161  |
| LmjF35.0870 | <i>L. major</i> | 48  | 675  | 722  |
| LmjF35.0880 | <i>L. major</i> | 52  | 207  | 258  |
| LmjF35.0880 | <i>L. major</i> | 118 | 402  | 519  |
| LmjF35.0890 | <i>L. major</i> | 52  | 56   | 107  |
| LmjF35.0900 | <i>L. major</i> | 235 | 1    | 235  |
| LmjF35.0910 | <i>L. major</i> | 206 | 1    | 206  |
| LmjF35.0910 | <i>L. major</i> | 434 | 327  | 760  |
| LmjF35.0910 | <i>L. major</i> | 93  | 797  | 889  |
| LmjF35.0910 | <i>L. major</i> | 322 | 910  | 1231 |
| LmjF35.0910 | <i>L. major</i> | 251 | 1233 | 1483 |
| LmjF35.0910 | <i>L. major</i> | 140 | 1538 | 1677 |
| LmjF35.0910 | <i>L. major</i> | 46  | 1756 | 1801 |
| LmjF35.0920 | <i>L. major</i> | 246 | 94   | 339  |
| LmjF35.0920 | <i>L. major</i> | 61  | 576  | 636  |
| LmjF35.0920 | <i>L. major</i> | 41  | 696  | 736  |
| LmjF35.0920 | <i>L. major</i> | 116 | 944  | 1059 |
| LmjF35.0920 | <i>L. major</i> | 139 | 1207 | 1345 |
| LmjF35.0930 | <i>L. major</i> | 136 | 1    | 136  |
| LmjF35.0940 | <i>L. major</i> | 55  | 44   | 98   |
| LmjF35.0950 | <i>L. major</i> | 141 | 74   | 214  |
| LmjF35.0960 | <i>L. major</i> | 166 | 102  | 267  |
| LmjF35.0960 | <i>L. major</i> | 40  | 278  | 317  |
| LmjF35.0960 | <i>L. major</i> | 44  | 495  | 538  |
| LmjF35.0960 | <i>L. major</i> | 78  | 567  | 644  |
| LmjF35.0960 | <i>L. major</i> | 62  | 683  | 744  |

|             |                 |     |      |      |
|-------------|-----------------|-----|------|------|
| LmjF35.0990 | <i>L. major</i> | 86  | 42   | 127  |
| LmjF35.0990 | <i>L. major</i> | 82  | 261  | 342  |
| LmjF35.0990 | <i>L. major</i> | 46  | 388  | 433  |
| LmjF35.0990 | <i>L. major</i> | 88  | 456  | 543  |
| LmjF35.0990 | <i>L. major</i> | 270 | 588  | 857  |
| LmjF35.1010 | <i>L. major</i> | 51  | 303  | 353  |
| LmjF35.1020 | <i>L. major</i> | 80  | 60   | 139  |
| LmjF35.1020 | <i>L. major</i> | 213 | 171  | 383  |
| LmjF35.1040 | <i>L. major</i> | 40  | 1    | 40   |
| LmjF35.1040 | <i>L. major</i> | 123 | 67   | 189  |
| LmjF35.1040 | <i>L. major</i> | 88  | 230  | 317  |
| LmjF35.1050 | <i>L. major</i> | 152 | 338  | 489  |
| LmjF35.1060 | <i>L. major</i> | 343 | 1    | 343  |
| LmjF35.1060 | <i>L. major</i> | 78  | 399  | 476  |
| LmjF35.1060 | <i>L. major</i> | 70  | 479  | 548  |
| LmjF35.1080 | <i>L. major</i> | 91  | 229  | 319  |
| LmjF35.1090 | <i>L. major</i> | 656 | 1    | 656  |
| LmjF35.1090 | <i>L. major</i> | 111 | 689  | 799  |
| LmjF35.1090 | <i>L. major</i> | 71  | 801  | 871  |
| LmjF35.1090 | <i>L. major</i> | 136 | 914  | 1049 |
| LmjF35.1100 | <i>L. major</i> | 553 | 1    | 553  |
| LmjF35.1100 | <i>L. major</i> | 108 | 574  | 681  |
| LmjF35.1110 | <i>L. major</i> | 73  | 1    | 73   |
| LmjF35.1110 | <i>L. major</i> | 41  | 130  | 170  |
| LmjF35.1130 | <i>L. major</i> | 44  | 1    | 44   |
| LmjF35.1130 | <i>L. major</i> | 45  | 509  | 553  |
| LmjF35.1130 | <i>L. major</i> | 45  | 509  | 553  |
| LmjF35.1160 | <i>L. major</i> | 41  | 1    | 41   |
| LmjF35.1170 | <i>L. major</i> | 46  | 1    | 46   |
| LmjF35.1170 | <i>L. major</i> | 152 | 68   | 219  |
| LmjF35.1170 | <i>L. major</i> | 103 | 505  | 607  |
| LmjF35.1240 | <i>L. major</i> | 163 | 1    | 163  |
| LmjF35.1240 | <i>L. major</i> | 148 | 233  | 380  |
| LmjF35.1240 | <i>L. major</i> | 149 | 410  | 558  |
| LmjF35.1240 | <i>L. major</i> | 146 | 702  | 847  |
| LmjF35.1260 | <i>L. major</i> | 48  | 314  | 361  |
| LmjF35.1270 | <i>L. major</i> | 63  | 38   | 100  |
| LmjF35.1270 | <i>L. major</i> | 99  | 200  | 298  |
| LmjF35.1290 | <i>L. major</i> | 106 | 46   | 151  |
| LmjF35.1290 | <i>L. major</i> | 57  | 193  | 249  |
| LmjF35.1310 | <i>L. major</i> | 49  | 1    | 49   |
| LmjF35.1320 | <i>L. major</i> | 281 | 73   | 353  |
| LmjF35.1320 | <i>L. major</i> | 120 | 481  | 600  |
| LmjF35.1320 | <i>L. major</i> | 117 | 669  | 785  |
| LmjF35.1320 | <i>L. major</i> | 102 | 861  | 962  |
| LmjF35.1320 | <i>L. major</i> | 69  | 970  | 1038 |
| LmjF35.1320 | <i>L. major</i> | 124 | 1071 | 1194 |

|             |                 |     |      |      |
|-------------|-----------------|-----|------|------|
| LmjF35.1320 | <i>L. major</i> | 183 | 1288 | 1470 |
| LmjF35.1320 | <i>L. major</i> | 50  | 1542 | 1591 |
| LmjF35.1320 | <i>L. major</i> | 69  | 1623 | 1691 |
| LmjF35.1350 | <i>L. major</i> | 63  | 159  | 221  |
| LmjF35.1355 | <i>L. major</i> | 243 | 1    | 243  |
| LmjF35.1355 | <i>L. major</i> | 49  | 281  | 329  |
| LmjF35.1360 | <i>L. major</i> | 149 | 17   | 165  |
| LmjF35.1360 | <i>L. major</i> | 58  | 245  | 302  |
| LmjF35.1360 | <i>L. major</i> | 107 | 343  | 449  |
| LmjF35.1390 | <i>L. major</i> | 52  | 1    | 52   |
| LmjF35.1390 | <i>L. major</i> | 67  | 115  | 181  |
| LmjF35.1390 | <i>L. major</i> | 50  | 315  | 364  |
| LmjF35.1390 | <i>L. major</i> | 121 | 560  | 680  |
| LmjF35.1400 | <i>L. major</i> | 113 | 120  | 232  |
| LmjF35.1410 | <i>L. major</i> | 44  | 497  | 540  |
| LmjF35.1410 | <i>L. major</i> | 45  | 595  | 639  |
| LmjF35.1410 | <i>L. major</i> | 45  | 595  | 639  |
| LmjF35.1420 | <i>L. major</i> | 325 | 1    | 325  |
| LmjF35.1430 | <i>L. major</i> | 63  | 198  | 260  |
| LmjF35.1440 | <i>L. major</i> | 63  | 198  | 260  |
| LmjF35.1450 | <i>L. major</i> | 56  | 1    | 56   |
| LmjF35.1450 | <i>L. major</i> | 113 | 224  | 336  |
| LmjF35.1450 | <i>L. major</i> | 97  | 389  | 485  |
| LmjF35.1450 | <i>L. major</i> | 52  | 539  | 590  |
| LmjF35.1450 | <i>L. major</i> | 69  | 594  | 662  |
| LmjF35.1450 | <i>L. major</i> | 49  | 736  | 784  |
| LmjF35.1450 | <i>L. major</i> | 71  | 841  | 911  |
| LmjF35.1450 | <i>L. major</i> | 40  | 950  | 989  |
| LmjF35.1450 | <i>L. major</i> | 40  | 1138 | 1177 |
| LmjF35.1450 | <i>L. major</i> | 47  | 1446 | 1492 |
| LmjF35.1450 | <i>L. major</i> | 203 | 1706 | 1908 |
| LmjF35.1450 | <i>L. major</i> | 101 | 2035 | 2135 |
| LmjF35.1450 | <i>L. major</i> | 79  | 2164 | 2242 |
| LmjF35.1450 | <i>L. major</i> | 149 | 2311 | 2459 |
| LmjF35.1450 | <i>L. major</i> | 162 | 2511 | 2672 |
| LmjF35.1450 | <i>L. major</i> | 280 | 2755 | 3034 |
| LmjF35.1450 | <i>L. major</i> | 105 | 3108 | 3212 |
| LmjF35.1470 | <i>L. major</i> | 80  | 1    | 80   |
| LmjF35.1510 | <i>L. major</i> | 74  | 212  | 285  |
| LmjF35.1510 | <i>L. major</i> | 291 | 293  | 583  |
| LmjF35.1520 | <i>L. major</i> | 86  | 214  | 299  |
| LmjF35.1520 | <i>L. major</i> | 46  | 479  | 524  |
| LmjF35.1520 | <i>L. major</i> | 46  | 479  | 524  |
| LmjF35.1530 | <i>L. major</i> | 87  | 27   | 113  |
| LmjF35.1530 | <i>L. major</i> | 73  | 165  | 237  |
| LmjF35.1530 | <i>L. major</i> | 73  | 165  | 237  |
| LmjF35.1540 | <i>L. major</i> | 41  | 24   | 64   |

|             |                 |     |      |      |
|-------------|-----------------|-----|------|------|
| LmjF35.1550 | <i>L. major</i> | 161 | 39   | 199  |
| LmjF35.1550 | <i>L. major</i> | 64  | 483  | 546  |
| LmjF35.1550 | <i>L. major</i> | 64  | 483  | 546  |
| LmjF35.1560 | <i>L. major</i> | 45  | 177  | 221  |
| LmjF35.1560 | <i>L. major</i> | 153 | 334  | 486  |
| LmjF35.1560 | <i>L. major</i> | 65  | 853  | 917  |
| LmjF35.1560 | <i>L. major</i> | 45  | 1020 | 1064 |
| LmjF35.1570 | <i>L. major</i> | 40  | 1    | 40   |
| LmjF35.1580 | <i>L. major</i> | 106 | 330  | 435  |
| LmjF35.1590 | <i>L. major</i> | 41  | 93   | 133  |
| LmjF35.1600 | <i>L. major</i> | 45  | 368  | 412  |
| LmjF35.1610 | <i>L. major</i> | 47  | 143  | 189  |
| LmjF35.1610 | <i>L. major</i> | 50  | 892  | 941  |
| LmjF35.1610 | <i>L. major</i> | 50  | 892  | 941  |
| LmjF35.1620 | <i>L. major</i> | 83  | 247  | 329  |
| LmjF35.1620 | <i>L. major</i> | 58  | 434  | 491  |
| LmjF35.1620 | <i>L. major</i> | 40  | 863  | 902  |
| LmjF35.1620 | <i>L. major</i> | 41  | 1053 | 1093 |
| LmjF35.1620 | <i>L. major</i> | 50  | 1280 | 1329 |
| LmjF35.1620 | <i>L. major</i> | 61  | 1891 | 1951 |
| LmjF35.1630 | <i>L. major</i> | 156 | 139  | 294  |
| LmjF35.1630 | <i>L. major</i> | 156 | 303  | 458  |
| LmjF35.1640 | <i>L. major</i> | 76  | 90   | 165  |
| LmjF35.1650 | <i>L. major</i> | 62  | 32   | 93   |
| LmjF35.1650 | <i>L. major</i> | 419 | 115  | 533  |
| LmjF35.1650 | <i>L. major</i> | 97  | 543  | 639  |
| LmjF35.1660 | <i>L. major</i> | 84  | 77   | 160  |
| LmjF35.1660 | <i>L. major</i> | 248 | 388  | 635  |
| LmjF35.1670 | <i>L. major</i> | 40  | 1    | 40   |
| LmjF35.1670 | <i>L. major</i> | 41  | 103  | 143  |
| LmjF35.1670 | <i>L. major</i> | 41  | 103  | 143  |
| LmjF35.1680 | <i>L. major</i> | 76  | 203  | 278  |
| LmjF35.1690 | <i>L. major</i> | 205 | 174  | 378  |
| LmjF35.1720 | <i>L. major</i> | 90  | 30   | 119  |
| LmjF35.1740 | <i>L. major</i> | 62  | 685  | 746  |
| LmjF35.1760 | <i>L. major</i> | 54  | 115  | 168  |
| LmjF35.1770 | <i>L. major</i> | 93  | 98   | 190  |
| LmjF35.1800 | <i>L. major</i> | 45  | 211  | 255  |
| LmjF35.1810 | <i>L. major</i> | 230 | 64   | 293  |
| LmjF35.1810 | <i>L. major</i> | 41  | 373  | 413  |
| LmjF35.1810 | <i>L. major</i> | 41  | 373  | 413  |
| LmjF35.1820 | <i>L. major</i> | 123 | 1    | 123  |
| LmjF35.1820 | <i>L. major</i> | 114 | 160  | 273  |
| LmjF35.1860 | <i>L. major</i> | 184 | 1    | 184  |
| LmjF35.1870 | <i>L. major</i> | 162 | 149  | 310  |
| LmjF35.1870 | <i>L. major</i> | 41  | 326  | 366  |
| LmjF35.1870 | <i>L. major</i> | 45  | 410  | 454  |

|             |                 |     |      |      |
|-------------|-----------------|-----|------|------|
| LmjF35.1870 | <i>L. major</i> | 54  | 538  | 591  |
| LmjF35.1870 | <i>L. major</i> | 49  | 617  | 665  |
| LmjF35.1880 | <i>L. major</i> | 69  | 237  | 305  |
| LmjF35.1890 | <i>L. major</i> | 69  | 260  | 328  |
| LmjF35.1900 | <i>L. major</i> | 69  | 237  | 305  |
| LmjF35.1910 | <i>L. major</i> | 51  | 35   | 85   |
| LmjF35.1910 | <i>L. major</i> | 47  | 154  | 200  |
| LmjF35.1910 | <i>L. major</i> | 47  | 154  | 200  |
| LmjF35.1930 | <i>L. major</i> | 48  | 45   | 92   |
| LmjF35.1940 | <i>L. major</i> | 75  | 89   | 163  |
| LmjF35.1940 | <i>L. major</i> | 77  | 226  | 302  |
| LmjF35.1945 | <i>L. major</i> | 40  | 31   | 70   |
| LmjF35.1945 | <i>L. major</i> | 43  | 124  | 166  |
| LmjF35.1945 | <i>L. major</i> | 393 | 228  | 620  |
| LmjF35.1970 | <i>L. major</i> | 118 | 136  | 253  |
| LmjF35.1980 | <i>L. major</i> | 42  | 280  | 321  |
| LmjF35.1980 | <i>L. major</i> | 50  | 357  | 406  |
| LmjF35.1980 | <i>L. major</i> | 163 | 427  | 589  |
| LmjF35.1990 | <i>L. major</i> | 55  | 199  | 253  |
| LmjF35.1990 | <i>L. major</i> | 43  | 391  | 433  |
| LmjF35.1990 | <i>L. major</i> | 50  | 480  | 529  |
| LmjF35.1990 | <i>L. major</i> | 77  | 659  | 735  |
| LmjF35.1990 | <i>L. major</i> | 64  | 767  | 830  |
| LmjF35.2000 | <i>L. major</i> | 71  | 554  | 624  |
| LmjF35.2000 | <i>L. major</i> | 42  | 730  | 771  |
| LmjF35.2000 | <i>L. major</i> | 43  | 796  | 838  |
| LmjF35.2010 | <i>L. major</i> | 120 | 130  | 249  |
| LmjF35.2030 | <i>L. major</i> | 126 | 133  | 258  |
| LmjF35.2030 | <i>L. major</i> | 76  | 305  | 380  |
| LmjF35.2030 | <i>L. major</i> | 59  | 433  | 491  |
| LmjF35.2030 | <i>L. major</i> | 52  | 936  | 987  |
| LmjF35.2030 | <i>L. major</i> | 46  | 1045 | 1090 |
| LmjF35.2030 | <i>L. major</i> | 47  | 1146 | 1192 |
| LmjF35.2030 | <i>L. major</i> | 94  | 1242 | 1335 |
| LmjF35.2030 | <i>L. major</i> | 49  | 1348 | 1396 |
| LmjF35.2040 | <i>L. major</i> | 89  | 147  | 235  |
| LmjF35.2040 | <i>L. major</i> | 97  | 618  | 714  |
| LmjF35.2040 | <i>L. major</i> | 67  | 1844 | 1910 |
| LmjF35.2040 | <i>L. major</i> | 46  | 2450 | 2495 |
| LmjF35.2040 | <i>L. major</i> | 48  | 2592 | 2639 |
| LmjF35.2040 | <i>L. major</i> | 45  | 2687 | 2731 |
| LmjF35.2040 | <i>L. major</i> | 65  | 3095 | 3159 |
| LmjF35.2040 | <i>L. major</i> | 106 | 3668 | 3773 |
| LmjF35.2050 | <i>L. major</i> | 65  | 1    | 65   |
| LmjF35.2060 | <i>L. major</i> | 54  | 1    | 54   |
| LmjF35.2060 | <i>L. major</i> | 48  | 217  | 264  |
| LmjF35.2060 | <i>L. major</i> | 89  | 394  | 482  |

|             |                 |     |      |      |
|-------------|-----------------|-----|------|------|
| LmjF35.2070 | <i>L. major</i> | 42  | 47   | 88   |
| LmjF35.2070 | <i>L. major</i> | 237 | 94   | 330  |
| LmjF35.2075 | <i>L. major</i> | 55  | 48   | 102  |
| LmjF35.2080 | <i>L. major</i> | 77  | 1    | 77   |
| LmjF35.2080 | <i>L. major</i> | 75  | 1035 | 1109 |
| LmjF35.2080 | <i>L. major</i> | 75  | 1035 | 1109 |
| LmjF35.2090 | <i>L. major</i> | 76  | 218  | 293  |
| LmjF35.2090 | <i>L. major</i> | 78  | 475  | 552  |
| LmjF35.2090 | <i>L. major</i> | 78  | 475  | 552  |
| LmjF35.2100 | <i>L. major</i> | 137 | 111  | 247  |
| LmjF35.2100 | <i>L. major</i> | 61  | 385  | 445  |
| LmjF35.2100 | <i>L. major</i> | 97  | 627  | 723  |
| LmjF35.2110 | <i>L. major</i> | 182 | 97   | 278  |
| LmjF35.2110 | <i>L. major</i> | 53  | 280  | 332  |
| LmjF35.2110 | <i>L. major</i> | 61  | 340  | 400  |
| LmjF35.2125 | <i>L. major</i> | 242 | 1    | 242  |
| LmjF35.2130 | <i>L. major</i> | 80  | 68   | 147  |
| LmjF35.2130 | <i>L. major</i> | 71  | 257  | 327  |
| LmjF35.2140 | <i>L. major</i> | 56  | 32   | 87   |
| LmjF35.2140 | <i>L. major</i> | 88  | 388  | 475  |
| LmjF35.2140 | <i>L. major</i> | 88  | 388  | 475  |
| LmjF35.2180 | <i>L. major</i> | 124 | 1    | 124  |
| LmjF35.2180 | <i>L. major</i> | 53  | 292  | 344  |
| LmjF35.2180 | <i>L. major</i> | 126 | 372  | 497  |
| LmjF35.2180 | <i>L. major</i> | 85  | 624  | 708  |
| LmjF35.2180 | <i>L. major</i> | 65  | 812  | 876  |
| LmjF35.2180 | <i>L. major</i> | 59  | 1012 | 1070 |
| LmjF35.2200 | <i>L. major</i> | 104 | 92   | 195  |
| LmjF35.2240 | <i>L. major</i> | 81  | 1    | 81   |
| LmjF35.2240 | <i>L. major</i> | 78  | 133  | 210  |
| LmjF35.2250 | <i>L. major</i> | 91  | 56   | 146  |
| LmjF35.2250 | <i>L. major</i> | 137 | 180  | 316  |
| LmjF35.2250 | <i>L. major</i> | 40  | 355  | 394  |
| LmjF35.2250 | <i>L. major</i> | 64  | 451  | 514  |
| LmjF35.2250 | <i>L. major</i> | 44  | 795  | 838  |
| LmjF35.2250 | <i>L. major</i> | 153 | 888  | 1040 |
| LmjF35.2250 | <i>L. major</i> | 133 | 1201 | 1333 |
| LmjF35.2250 | <i>L. major</i> | 52  | 1436 | 1487 |
| LmjF35.2250 | <i>L. major</i> | 42  | 1517 | 1558 |
| LmjF35.2250 | <i>L. major</i> | 40  | 1746 | 1785 |
| LmjF35.2250 | <i>L. major</i> | 65  | 1843 | 1907 |
| LmjF35.2250 | <i>L. major</i> | 86  | 1994 | 2079 |
| LmjF35.2250 | <i>L. major</i> | 188 | 2110 | 2297 |
| LmjF35.2250 | <i>L. major</i> | 103 | 2386 | 2488 |
| LmjF35.2250 | <i>L. major</i> | 150 | 2538 | 2687 |
| LmjF35.2270 | <i>L. major</i> | 118 | 1    | 118  |
| LmjF35.2270 | <i>L. major</i> | 64  | 602  | 665  |

|             |                 |     |      |      |
|-------------|-----------------|-----|------|------|
| LmjF35.2270 | <i>L. major</i> | 65  | 1086 | 1150 |
| LmjF35.2280 | <i>L. major</i> | 61  | 1    | 61   |
| LmjF35.2290 | <i>L. major</i> | 111 | 60   | 170  |
| LmjF35.2290 | <i>L. major</i> | 74  | 221  | 294  |
| LmjF35.2290 | <i>L. major</i> | 71  | 382  | 452  |
| LmjF35.2290 | <i>L. major</i> | 41  | 557  | 597  |
| LmjF35.2290 | <i>L. major</i> | 52  | 686  | 737  |
| LmjF35.2290 | <i>L. major</i> | 158 | 846  | 1003 |
| LmjF35.2290 | <i>L. major</i> | 68  | 1023 | 1090 |
| LmjF35.2290 | <i>L. major</i> | 124 | 1226 | 1349 |
| LmjF35.2300 | <i>L. major</i> | 111 | 1    | 111  |
| LmjF35.2300 | <i>L. major</i> | 51  | 356  | 406  |
| LmjF35.2310 | <i>L. major</i> | 72  | 1    | 72   |
| LmjF35.2310 | <i>L. major</i> | 80  | 106  | 185  |
| LmjF35.2310 | <i>L. major</i> | 80  | 106  | 185  |
| LmjF35.2320 | <i>L. major</i> | 112 | 1    | 112  |
| LmjF35.2320 | <i>L. major</i> | 77  | 142  | 218  |
| LmjF35.2320 | <i>L. major</i> | 46  | 453  | 498  |
| LmjF35.2320 | <i>L. major</i> | 114 | 597  | 710  |
| LmjF35.2320 | <i>L. major</i> | 145 | 800  | 944  |
| LmjF35.2320 | <i>L. major</i> | 169 | 958  | 1126 |
| LmjF35.2330 | <i>L. major</i> | 40  | 342  | 381  |
| LmjF35.2360 | <i>L. major</i> | 187 | 1    | 187  |
| LmjF35.2370 | <i>L. major</i> | 92  | 176  | 267  |
| LmjF35.2370 | <i>L. major</i> | 60  | 312  | 371  |
| LmjF35.2370 | <i>L. major</i> | 108 | 416  | 523  |
| LmjF35.2370 | <i>L. major</i> | 108 | 535  | 642  |
| LmjF35.2380 | <i>L. major</i> | 60  | 65   | 124  |
| LmjF35.2380 | <i>L. major</i> | 62  | 391  | 452  |
| LmjF35.2380 | <i>L. major</i> | 41  | 519  | 559  |
| LmjF35.2380 | <i>L. major</i> | 50  | 725  | 774  |
| LmjF35.2380 | <i>L. major</i> | 292 | 980  | 1271 |
| LmjF35.2390 | <i>L. major</i> | 56  | 97   | 152  |
| LmjF35.2400 | <i>L. major</i> | 45  | 174  | 218  |
| LmjF35.2400 | <i>L. major</i> | 52  | 785  | 836  |
| LmjF35.2400 | <i>L. major</i> | 52  | 785  | 836  |
| LmjF35.2410 | <i>L. major</i> | 448 | 1    | 448  |
| LmjF35.2420 | <i>L. major</i> | 52  | 152  | 203  |
| LmjF35.2420 | <i>L. major</i> | 52  | 321  | 372  |
| LmjF35.2420 | <i>L. major</i> | 40  | 378  | 417  |
| LmjF35.2430 | <i>L. major</i> | 49  | 26   | 74   |
| LmjF35.2430 | <i>L. major</i> | 49  | 133  | 181  |
| LmjF35.2430 | <i>L. major</i> | 130 | 210  | 339  |
| LmjF35.2430 | <i>L. major</i> | 65  | 355  | 419  |
| LmjF35.2430 | <i>L. major</i> | 291 | 467  | 757  |
| LmjF35.2450 | <i>L. major</i> | 59  | 184  | 242  |
| LmjF35.2450 | <i>L. major</i> | 59  | 539  | 597  |



|             |                 |     |      |      |
|-------------|-----------------|-----|------|------|
| LmjF35.2450 | <i>L. major</i> | 64  | 1026 | 1089 |
| LmjF35.2450 | <i>L. major</i> | 41  | 1092 | 1132 |
| LmjF35.2450 | <i>L. major</i> | 125 | 1688 | 1812 |
| LmjF35.2450 | <i>L. major</i> | 60  | 1834 | 1893 |
| LmjF35.2450 | <i>L. major</i> | 79  | 2183 | 2261 |
| LmjF35.2470 | <i>L. major</i> | 220 | 91   | 310  |
| LmjF35.2470 | <i>L. major</i> | 91  | 405  | 495  |
| LmjF35.2480 | <i>L. major</i> | 222 | 30   | 251  |
| LmjF35.2480 | <i>L. major</i> | 49  | 291  | 339  |
| LmjF35.2490 | <i>L. major</i> | 125 | 8    | 132  |
| LmjF35.2490 | <i>L. major</i> | 286 | 842  | 1127 |
| LmjF35.2490 | <i>L. major</i> | 273 | 1202 | 1474 |
| LmjF35.2490 | <i>L. major</i> | 164 | 1493 | 1656 |
| LmjF35.2500 | <i>L. major</i> | 66  | 181  | 246  |
| LmjF35.2520 | <i>L. major</i> | 56  | 140  | 195  |
| LmjF35.2520 | <i>L. major</i> | 88  | 229  | 316  |
| LmjF35.2520 | <i>L. major</i> | 88  | 229  | 316  |
| LmjF35.2530 | <i>L. major</i> | 150 | 1    | 150  |
| LmjF35.2530 | <i>L. major</i> | 45  | 294  | 338  |
| LmjF35.2550 | <i>L. major</i> | 160 | 1    | 160  |
| LmjF35.2550 | <i>L. major</i> | 113 | 343  | 455  |
| LmjF35.2560 | <i>L. major</i> | 43  | 33   | 75   |
| LmjF35.2560 | <i>L. major</i> | 124 | 293  | 416  |
| LmjF35.2570 | <i>L. major</i> | 148 | 70   | 217  |
| LmjF35.2580 | <i>L. major</i> | 89  | 1    | 89   |
| LmjF35.2580 | <i>L. major</i> | 70  | 122  | 191  |
| LmjF35.2580 | <i>L. major</i> | 70  | 122  | 191  |
| LmjF35.2610 | <i>L. major</i> | 201 | 22   | 222  |
| LmjF35.2620 | <i>L. major</i> | 54  | 1    | 54   |
| LmjF35.2620 | <i>L. major</i> | 100 | 166  | 265  |
| LmjF35.2620 | <i>L. major</i> | 131 | 271  | 401  |
| LmjF35.2630 | <i>L. major</i> | 85  | 90   | 174  |
| LmjF35.2630 | <i>L. major</i> | 43  | 207  | 249  |
| LmjF35.2630 | <i>L. major</i> | 150 | 395  | 544  |
| LmjF35.2630 | <i>L. major</i> | 48  | 546  | 593  |
| LmjF35.2660 | <i>L. major</i> | 63  | 105  | 167  |
| LmjF35.2660 | <i>L. major</i> | 436 | 179  | 614  |
| LmjF35.2690 | <i>L. major</i> | 138 | 1    | 138  |
| LmjF35.2700 | <i>L. major</i> | 46  | 343  | 388  |
| LmjF35.2700 | <i>L. major</i> | 71  | 468  | 538  |
| LmjF35.2700 | <i>L. major</i> | 49  | 1054 | 1102 |
| LmjF35.2700 | <i>L. major</i> | 93  | 1148 | 1240 |
| LmjF35.2710 | <i>L. major</i> | 61  | 39   | 99   |
| LmjF35.2710 | <i>L. major</i> | 66  | 166  | 231  |
| LmjF35.2720 | <i>L. major</i> | 58  | 53   | 110  |
| LmjF35.2720 | <i>L. major</i> | 60  | 155  | 214  |
| LmjF35.2720 | <i>L. major</i> | 60  | 155  | 214  |

|             |                 |     |      |      |
|-------------|-----------------|-----|------|------|
| LmjF35.2725 | <i>L. major</i> | 153 | 1    | 153  |
| LmjF35.2725 | <i>L. major</i> | 101 | 211  | 311  |
| LmjF35.2725 | <i>L. major</i> | 55  | 340  | 394  |
| LmjF35.2750 | <i>L. major</i> | 89  | 1    | 89   |
| LmjF35.2750 | <i>L. major</i> | 226 | 95   | 320  |
| LmjF35.2750 | <i>L. major</i> | 53  | 377  | 429  |
| LmjF35.2760 | <i>L. major</i> | 43  | 1    | 43   |
| LmjF35.2760 | <i>L. major</i> | 139 | 265  | 403  |
| LmjF35.2760 | <i>L. major</i> | 59  | 562  | 620  |
| LmjF35.2770 | <i>L. major</i> | 48  | 42   | 89   |
| LmjF35.2770 | <i>L. major</i> | 62  | 323  | 384  |
| LmjF35.2770 | <i>L. major</i> | 42  | 426  | 467  |
| LmjF35.2770 | <i>L. major</i> | 67  | 657  | 723  |
| LmjF35.2770 | <i>L. major</i> | 120 | 884  | 1003 |
| LmjF35.2770 | <i>L. major</i> | 63  | 1117 | 1179 |
| LmjF35.2780 | <i>L. major</i> | 46  | 525  | 570  |
| LmjF35.2780 | <i>L. major</i> | 91  | 608  | 698  |
| LmjF35.2810 | <i>L. major</i> | 40  | 269  | 308  |
| LmjF35.2810 | <i>L. major</i> | 62  | 397  | 458  |
| LmjF35.2810 | <i>L. major</i> | 62  | 397  | 458  |
| LmjF35.2820 | <i>L. major</i> | 135 | 291  | 425  |
| LmjF35.2830 | <i>L. major</i> | 88  | 413  | 500  |
| LmjF35.2830 | <i>L. major</i> | 49  | 532  | 580  |
| LmjF35.2830 | <i>L. major</i> | 49  | 532  | 580  |
| LmjF35.2850 | <i>L. major</i> | 204 | 277  | 480  |
| LmjF35.2860 | <i>L. major</i> | 76  | 1    | 76   |
| LmjF35.2860 | <i>L. major</i> | 53  | 99   | 151  |
| LmjF35.2870 | <i>L. major</i> | 52  | 121  | 172  |
| LmjF35.2870 | <i>L. major</i> | 95  | 383  | 477  |
| LmjF35.2870 | <i>L. major</i> | 102 | 516  | 617  |
| LmjF35.2890 | <i>L. major</i> | 61  | 1    | 61   |
| LmjF35.2890 | <i>L. major</i> | 86  | 284  | 369  |
| LmjF35.2890 | <i>L. major</i> | 42  | 371  | 412  |
| LmjF35.2890 | <i>L. major</i> | 104 | 466  | 569  |
| LmjF35.2910 | <i>L. major</i> | 65  | 1    | 65   |
| LmjF35.2920 | <i>L. major</i> | 52  | 39   | 90   |
| LmjF35.2920 | <i>L. major</i> | 54  | 125  | 178  |
| LmjF35.2920 | <i>L. major</i> | 156 | 350  | 505  |
| LmjF35.2920 | <i>L. major</i> | 60  | 616  | 675  |
| LmjF35.2940 | <i>L. major</i> | 76  | 1    | 76   |
| LmjF35.2950 | <i>L. major</i> | 49  | 19   | 67   |
| LmjF35.2950 | <i>L. major</i> | 65  | 986  | 1050 |
| LmjF35.2950 | <i>L. major</i> | 65  | 986  | 1050 |
| LmjF35.2960 | <i>L. major</i> | 46  | 514  | 559  |
| LmjF35.2970 | <i>L. major</i> | 84  | 140  | 223  |
| LmjF35.2970 | <i>L. major</i> | 50  | 332  | 381  |
| LmjF35.2980 | <i>L. major</i> | 256 | 1    | 256  |

|             |                 |     |      |      |
|-------------|-----------------|-----|------|------|
| LmjF35.2980 | <i>L. major</i> | 86  | 393  | 478  |
| LmjF35.2990 | <i>L. major</i> | 54  | 15   | 68   |
| LmjF35.2990 | <i>L. major</i> | 52  | 361  | 412  |
| LmjF35.3000 | <i>L. major</i> | 45  | 50   | 94   |
| LmjF35.3050 | <i>L. major</i> | 120 | 78   | 197  |
| LmjF35.3050 | <i>L. major</i> | 69  | 273  | 341  |
| LmjF35.3050 | <i>L. major</i> | 61  | 350  | 410  |
| LmjF35.3060 | <i>L. major</i> | 61  | 344  | 404  |
| LmjF35.3060 | <i>L. major</i> | 53  | 861  | 913  |
| LmjF35.3060 | <i>L. major</i> | 53  | 861  | 913  |
| LmjF35.3070 | <i>L. major</i> | 55  | 1    | 55   |
| LmjF35.3090 | <i>L. major</i> | 72  | 70   | 141  |
| LmjF35.3090 | <i>L. major</i> | 99  | 182  | 280  |
| LmjF35.3090 | <i>L. major</i> | 99  | 182  | 280  |
| LmjF35.3100 | <i>L. major</i> | 430 | 1    | 430  |
| LmjF35.3100 | <i>L. major</i> | 70  | 854  | 923  |
| LmjF35.3120 | <i>L. major</i> | 81  | 32   | 112  |
| LmjF35.3120 | <i>L. major</i> | 41  | 394  | 434  |
| LmjF35.3120 | <i>L. major</i> | 150 | 762  | 911  |
| LmjF35.3120 | <i>L. major</i> | 247 | 1073 | 1319 |
| LmjF35.3120 | <i>L. major</i> | 80  | 1372 | 1451 |
| LmjF35.3120 | <i>L. major</i> | 148 | 1477 | 1624 |
| LmjF35.3130 | <i>L. major</i> | 58  | 1    | 58   |
| LmjF35.3150 | <i>L. major</i> | 64  | 38   | 101  |
| LmjF35.3150 | <i>L. major</i> | 82  | 121  | 202  |
| LmjF35.3150 | <i>L. major</i> | 102 | 339  | 440  |
| LmjF35.3170 | <i>L. major</i> | 51  | 1    | 51   |
| LmjF35.3170 | <i>L. major</i> | 539 | 59   | 597  |
| LmjF35.3170 | <i>L. major</i> | 89  | 782  | 870  |
| LmjF35.3170 | <i>L. major</i> | 187 | 1138 | 1324 |
| LmjF35.3170 | <i>L. major</i> | 214 | 1367 | 1580 |
| LmjF35.3170 | <i>L. major</i> | 41  | 1730 | 1770 |
| LmjF35.3180 | <i>L. major</i> | 47  | 1    | 47   |
| LmjF35.3180 | <i>L. major</i> | 40  | 54   | 93   |
| LmjF35.3180 | <i>L. major</i> | 68  | 125  | 192  |
| LmjF35.3190 | <i>L. major</i> | 54  | 1    | 54   |
| LmjF35.3190 | <i>L. major</i> | 64  | 161  | 224  |
| LmjF35.3190 | <i>L. major</i> | 233 | 299  | 531  |
| LmjF35.3190 | <i>L. major</i> | 42  | 561  | 602  |
| LmjF35.3200 | <i>L. major</i> | 56  | 118  | 173  |
| LmjF35.3200 | <i>L. major</i> | 319 | 384  | 702  |
| LmjF35.3210 | <i>L. major</i> | 212 | 35   | 246  |
| LmjF35.3220 | <i>L. major</i> | 42  | 1    | 42   |
| LmjF35.3240 | <i>L. major</i> | 115 | 1    | 115  |
| LmjF35.3240 | <i>L. major</i> | 621 | 180  | 800  |
| LmjF35.3260 | <i>L. major</i> | 207 | 1    | 207  |
| LmjF35.3260 | <i>L. major</i> | 48  | 227  | 274  |

|             |                 |     |      |      |
|-------------|-----------------|-----|------|------|
| LmjF35.3270 | <i>L. major</i> | 171 | 19   | 189  |
| LmjF35.3280 | <i>L. major</i> | 104 | 1    | 104  |
| LmjF35.3290 | <i>L. major</i> | 104 | 1    | 104  |
| LmjF35.3300 | <i>L. major</i> | 41  | 348  | 388  |
| LmjF35.3300 | <i>L. major</i> | 55  | 456  | 510  |
| LmjF35.3300 | <i>L. major</i> | 47  | 556  | 602  |
| LmjF35.3310 | <i>L. major</i> | 137 | 141  | 277  |
| LmjF35.3350 | <i>L. major</i> | 61  | 1    | 61   |
| LmjF35.3350 | <i>L. major</i> | 108 | 354  | 461  |
| LmjF35.3360 | <i>L. major</i> | 52  | 1    | 52   |
| LmjF35.3360 | <i>L. major</i> | 41  | 167  | 207  |
| LmjF35.3360 | <i>L. major</i> | 48  | 604  | 651  |
| LmjF35.3360 | <i>L. major</i> | 55  | 997  | 1051 |
| LmjF35.3360 | <i>L. major</i> | 56  | 1206 | 1261 |
| LmjF35.3360 | <i>L. major</i> | 48  | 1713 | 1760 |
| LmjF35.3360 | <i>L. major</i> | 60  | 2015 | 2074 |
| LmjF35.3370 | <i>L. major</i> | 130 | 1    | 130  |
| LmjF35.3370 | <i>L. major</i> | 51  | 1015 | 1065 |
| LmjF35.3380 | <i>L. major</i> | 97  | 442  | 538  |
| LmjF35.3390 | <i>L. major</i> | 64  | 152  | 215  |
| LmjF35.3400 | <i>L. major</i> | 44  | 252  | 295  |
| LmjF35.3410 | <i>L. major</i> | 60  | 1    | 60   |
| LmjF35.3410 | <i>L. major</i> | 46  | 96   | 141  |
| LmjF35.3410 | <i>L. major</i> | 51  | 358  | 408  |
| LmjF35.3420 | <i>L. major</i> | 122 | 1    | 122  |
| LmjF35.3430 | <i>L. major</i> | 44  | 18   | 61   |
| LmjF35.3430 | <i>L. major</i> | 41  | 165  | 205  |
| LmjF35.3430 | <i>L. major</i> | 46  | 217  | 262  |
| LmjF35.3430 | <i>L. major</i> | 60  | 390  | 449  |
| LmjF35.3430 | <i>L. major</i> | 57  | 490  | 546  |
| LmjF35.3450 | <i>L. major</i> | 162 | 1    | 162  |
| LmjF35.3450 | <i>L. major</i> | 96  | 378  | 473  |
| LmjF35.3460 | <i>L. major</i> | 99  | 206  | 304  |
| LmjF35.3470 | <i>L. major</i> | 43  | 490  | 532  |
| LmjF35.3480 | <i>L. major</i> | 98  | 139  | 236  |
| LmjF35.3480 | <i>L. major</i> | 313 | 418  | 730  |
| LmjF35.3490 | <i>L. major</i> | 225 | 202  | 426  |
| LmjF35.3500 | <i>L. major</i> | 94  | 1    | 94   |
| LmjF35.3500 | <i>L. major</i> | 64  | 122  | 185  |
| LmjF35.3510 | <i>L. major</i> | 57  | 85   | 141  |
| LmjF35.3510 | <i>L. major</i> | 357 | 192  | 548  |
| LmjF35.3510 | <i>L. major</i> | 41  | 702  | 742  |
| LmjF35.3510 | <i>L. major</i> | 91  | 864  | 954  |
| LmjF35.3510 | <i>L. major</i> | 184 | 982  | 1165 |
| LmjF35.3520 | <i>L. major</i> | 242 | 1    | 242  |
| LmjF35.3530 | <i>L. major</i> | 44  | 53   | 96   |
| LmjF35.3550 | <i>L. major</i> | 341 | 1    | 341  |

|             |                 |     |      |      |
|-------------|-----------------|-----|------|------|
| LmjF35.3550 | <i>L. major</i> | 369 | 381  | 749  |
| LmjF35.3560 | <i>L. major</i> | 55  | 318  | 372  |
| LmjF35.3570 | <i>L. major</i> | 145 | 1    | 145  |
| LmjF35.3570 | <i>L. major</i> | 73  | 792  | 864  |
| LmjF35.3570 | <i>L. major</i> | 94  | 986  | 1079 |
| LmjF35.3580 | <i>L. major</i> | 225 | 480  | 704  |
| LmjF35.3590 | <i>L. major</i> | 150 | 78   | 227  |
| LmjF35.3590 | <i>L. major</i> | 330 | 299  | 628  |
| LmjF35.3590 | <i>L. major</i> | 59  | 873  | 931  |
| LmjF35.3600 | <i>L. major</i> | 58  | 1    | 58   |
| LmjF35.3630 | <i>L. major</i> | 42  | 27   | 68   |
| LmjF35.3630 | <i>L. major</i> | 46  | 565  | 610  |
| LmjF35.3630 | <i>L. major</i> | 46  | 565  | 610  |
| LmjF35.3640 | <i>L. major</i> | 179 | 23   | 201  |
| LmjF35.3650 | <i>L. major</i> | 46  | 17   | 62   |
| LmjF35.3650 | <i>L. major</i> | 445 | 130  | 574  |
| LmjF35.3650 | <i>L. major</i> | 58  | 604  | 661  |
| LmjF35.3650 | <i>L. major</i> | 50  | 728  | 777  |
| LmjF35.3660 | <i>L. major</i> | 49  | 1    | 49   |
| LmjF35.3660 | <i>L. major</i> | 40  | 125  | 164  |
| LmjF35.3660 | <i>L. major</i> | 59  | 717  | 775  |
| LmjF35.3660 | <i>L. major</i> | 101 | 812  | 912  |
| LmjF35.3660 | <i>L. major</i> | 49  | 1251 | 1299 |
| LmjF35.3710 | <i>L. major</i> | 119 | 1    | 119  |
| LmjF35.3720 | <i>L. major</i> | 112 | 1    | 112  |
| LmjF35.3720 | <i>L. major</i> | 147 | 173  | 319  |
| LmjF35.3720 | <i>L. major</i> | 88  | 353  | 440  |
| LmjF35.3730 | <i>L. major</i> | 42  | 168  | 209  |
| LmjF35.3750 | <i>L. major</i> | 49  | 174  | 222  |
| LmjF35.3750 | <i>L. major</i> | 64  | 277  | 340  |
| LmjF35.3750 | <i>L. major</i> | 45  | 474  | 518  |
| LmjF35.3750 | <i>L. major</i> | 137 | 544  | 680  |
| LmjF35.3750 | <i>L. major</i> | 48  | 786  | 833  |
| LmjF35.3760 | <i>L. major</i> | 47  | 1    | 47   |
| LmjF35.3770 | <i>L. major</i> | 73  | 230  | 302  |
| LmjF35.3780 | <i>L. major</i> | 47  | 1    | 47   |
| LmjF35.3820 | <i>L. major</i> | 61  | 1    | 61   |
| LmjF35.3820 | <i>L. major</i> | 61  | 75   | 135  |
| LmjF35.3820 | <i>L. major</i> | 114 | 163  | 276  |
| LmjF35.3820 | <i>L. major</i> | 40  | 281  | 320  |
| LmjF35.3850 | <i>L. major</i> | 88  | 225  | 312  |
| LmjF35.3860 | <i>L. major</i> | 49  | 522  | 570  |
| LmjF35.3870 | <i>L. major</i> | 40  | 152  | 191  |
| LmjF35.3880 | <i>L. major</i> | 84  | 361  | 444  |
| LmjF35.3900 | <i>L. major</i> | 73  | 1    | 73   |
| LmjF35.3920 | <i>L. major</i> | 43  | 575  | 617  |
| LmjF35.3925 | <i>L. major</i> | 388 | 43   | 430  |

|             |                 |     |      |      |
|-------------|-----------------|-----|------|------|
| LmjF35.3940 | <i>L. major</i> | 78  | 1    | 78   |
| LmjF35.3950 | <i>L. major</i> | 40  | 1    | 40   |
| LmjF35.3950 | <i>L. major</i> | 52  | 492  | 543  |
| LmjF35.3950 | <i>L. major</i> | 53  | 1884 | 1936 |
| LmjF35.3950 | <i>L. major</i> | 47  | 2076 | 2122 |
| LmjF35.3970 | <i>L. major</i> | 218 | 83   | 300  |
| LmjF35.3970 | <i>L. major</i> | 122 | 583  | 704  |
| LmjF35.3980 | <i>L. major</i> | 202 | 30   | 231  |
| LmjF35.3980 | <i>L. major</i> | 562 | 235  | 796  |
| LmjF35.4000 | <i>L. major</i> | 68  | 143  | 210  |
| LmjF35.4000 | <i>L. major</i> | 61  | 240  | 300  |
| LmjF35.4000 | <i>L. major</i> | 101 | 333  | 433  |
| LmjF35.4000 | <i>L. major</i> | 113 | 467  | 579  |
| LmjF35.4010 | <i>L. major</i> | 42  | 1    | 42   |
| LmjF35.4020 | <i>L. major</i> | 64  | 88   | 151  |
| LmjF35.4030 | <i>L. major</i> | 80  | 406  | 485  |
| LmjF35.4030 | <i>L. major</i> | 118 | 573  | 690  |
| LmjF35.4030 | <i>L. major</i> | 118 | 573  | 690  |
| LmjF35.4040 | <i>L. major</i> | 45  | 34   | 78   |
| LmjF35.4040 | <i>L. major</i> | 200 | 111  | 310  |
| LmjF35.4050 | <i>L. major</i> | 43  | 238  | 280  |
| LmjF35.4050 | <i>L. major</i> | 383 | 362  | 744  |
| LmjF35.4050 | <i>L. major</i> | 160 | 913  | 1072 |
| LmjF35.4070 | <i>L. major</i> | 64  | 139  | 202  |
| LmjF35.4070 | <i>L. major</i> | 51  | 288  | 338  |
| LmjF35.4080 | <i>L. major</i> | 71  | 42   | 112  |
| LmjF35.4080 | <i>L. major</i> | 271 | 137  | 407  |
| LmjF35.4080 | <i>L. major</i> | 138 | 434  | 571  |
| LmjF35.4080 | <i>L. major</i> | 392 | 673  | 1064 |
| LmjF35.4100 | <i>L. major</i> | 50  | 1    | 50   |
| LmjF35.4100 | <i>L. major</i> | 52  | 211  | 262  |
| LmjF35.4100 | <i>L. major</i> | 52  | 211  | 262  |
| LmjF35.4110 | <i>L. major</i> | 80  | 57   | 136  |
| LmjF35.4120 | <i>L. major</i> | 89  | 78   | 166  |
| LmjF35.4120 | <i>L. major</i> | 64  | 213  | 276  |
| LmjF35.4120 | <i>L. major</i> | 119 | 411  | 529  |
| LmjF35.4120 | <i>L. major</i> | 149 | 595  | 743  |
| LmjF35.4120 | <i>L. major</i> | 57  | 757  | 813  |
| LmjF35.4125 | <i>L. major</i> | 588 | 1    | 588  |
| LmjF35.4130 | <i>L. major</i> | 66  | 237  | 302  |
| LmjF35.4130 | <i>L. major</i> | 169 | 365  | 533  |
| LmjF35.4140 | <i>L. major</i> | 45  | 164  | 208  |
| LmjF35.4150 | <i>L. major</i> | 85  | 1    | 85   |
| LmjF35.4150 | <i>L. major</i> | 102 | 131  | 232  |
| LmjF35.4170 | <i>L. major</i> | 195 | 40   | 234  |
| LmjF35.4190 | <i>L. major</i> | 78  | 1    | 78   |
| LmjF35.4200 | <i>L. major</i> | 53  | 342  | 394  |

|             |                 |     |      |      |
|-------------|-----------------|-----|------|------|
| LmjF35.4200 | <i>L. major</i> | 107 | 427  | 533  |
| LmjF35.4200 | <i>L. major</i> | 107 | 427  | 533  |
| LmjF35.4210 | <i>L. major</i> | 578 | 1    | 578  |
| LmjF35.4210 | <i>L. major</i> | 74  | 628  | 701  |
| LmjF35.4220 | <i>L. major</i> | 40  | 17   | 56   |
| LmjF35.4220 | <i>L. major</i> | 335 | 70   | 404  |
| LmjF35.4220 | <i>L. major</i> | 174 | 429  | 602  |
| LmjF35.4230 | <i>L. major</i> | 82  | 144  | 225  |
| LmjF35.4230 | <i>L. major</i> | 55  | 309  | 363  |
| LmjF35.4230 | <i>L. major</i> | 61  | 401  | 461  |
| LmjF35.4230 | <i>L. major</i> | 74  | 614  | 687  |
| LmjF35.4230 | <i>L. major</i> | 59  | 718  | 776  |
| LmjF35.4240 | <i>L. major</i> | 66  | 142  | 207  |
| LmjF35.4250 | <i>L. major</i> | 45  | 277  | 321  |
| LmjF35.4260 | <i>L. major</i> | 46  | 1    | 46   |
| LmjF35.4260 | <i>L. major</i> | 213 | 65   | 277  |
| LmjF35.4260 | <i>L. major</i> | 41  | 291  | 331  |
| LmjF35.4270 | <i>L. major</i> | 72  | 98   | 169  |
| LmjF35.4280 | <i>L. major</i> | 167 | 1    | 167  |
| LmjF35.4280 | <i>L. major</i> | 212 | 304  | 515  |
| LmjF35.4280 | <i>L. major</i> | 82  | 518  | 599  |
| LmjF35.4280 | <i>L. major</i> | 97  | 687  | 783  |
| LmjF35.4290 | <i>L. major</i> | 59  | 65   | 123  |
| LmjF35.4290 | <i>L. major</i> | 112 | 166  | 277  |
| LmjF35.4300 | <i>L. major</i> | 57  | 22   | 78   |
| LmjF35.4300 | <i>L. major</i> | 45  | 188  | 232  |
| LmjF35.4320 | <i>L. major</i> | 56  | 37   | 92   |
| LmjF35.4320 | <i>L. major</i> | 59  | 124  | 182  |
| LmjF35.4330 | <i>L. major</i> | 83  | 1    | 83   |
| LmjF35.4330 | <i>L. major</i> | 40  | 119  | 158  |
| LmjF35.4330 | <i>L. major</i> | 85  | 211  | 295  |
| LmjF35.4330 | <i>L. major</i> | 120 | 418  | 537  |
| LmjF35.4330 | <i>L. major</i> | 63  | 550  | 612  |
| LmjF35.4360 | <i>L. major</i> | 101 | 679  | 779  |
| LmjF35.4360 | <i>L. major</i> | 101 | 1265 | 1365 |
| LmjF35.4360 | <i>L. major</i> | 41  | 2083 | 2123 |
| LmjF35.4370 | <i>L. major</i> | 51  | 64   | 114  |
| LmjF35.4380 | <i>L. major</i> | 470 | 26   | 495  |
| LmjF35.4400 | <i>L. major</i> | 58  | 10   | 67   |
| LmjF35.4400 | <i>L. major</i> | 47  | 85   | 131  |
| LmjF35.4400 | <i>L. major</i> | 73  | 134  | 206  |
| LmjF35.4440 | <i>L. major</i> | 42  | 1    | 42   |
| LmjF35.4440 | <i>L. major</i> | 64  | 44   | 107  |
| LmjF35.4440 | <i>L. major</i> | 64  | 44   | 107  |
| LmjF35.4450 | <i>L. major</i> | 55  | 1    | 55   |
| LmjF35.4450 | <i>L. major</i> | 41  | 59   | 99   |
| LmjF35.4450 | <i>L. major</i> | 158 | 107  | 264  |

|             |                 |     |      |      |
|-------------|-----------------|-----|------|------|
| LmjF35.4470 | <i>L. major</i> | 88  | 112  | 199  |
| LmjF35.4490 | <i>L. major</i> | 507 | 1    | 507  |
| LmjF35.4490 | <i>L. major</i> | 40  | 644  | 683  |
| LmjF35.4490 | <i>L. major</i> | 114 | 760  | 873  |
| LmjF35.4490 | <i>L. major</i> | 357 | 1131 | 1487 |
| LmjF35.4510 | <i>L. major</i> | 69  | 1    | 69   |
| LmjF35.4520 | <i>L. major</i> | 48  | 216  | 263  |
| LmjF35.4530 | <i>L. major</i> | 60  | 254  | 313  |
| LmjF35.4530 | <i>L. major</i> | 64  | 531  | 594  |
| LmjF35.4530 | <i>L. major</i> | 64  | 531  | 594  |
| LmjF35.4540 | <i>L. major</i> | 47  | 1    | 47   |
| LmjF35.4540 | <i>L. major</i> | 71  | 420  | 490  |
| LmjF35.4540 | <i>L. major</i> | 71  | 420  | 490  |
| LmjF35.4550 | <i>L. major</i> | 43  | 77   | 119  |
| LmjF35.4560 | <i>L. major</i> | 213 | 99   | 311  |
| LmjF35.4580 | <i>L. major</i> | 147 | 386  | 532  |
| LmjF35.4600 | <i>L. major</i> | 88  | 85   | 172  |
| LmjF35.4600 | <i>L. major</i> | 310 | 202  | 511  |
| LmjF35.4620 | <i>L. major</i> | 44  | 245  | 288  |
| LmjF35.4640 | <i>L. major</i> | 114 | 1    | 114  |
| LmjF35.4650 | <i>L. major</i> | 66  | 30   | 95   |
| LmjF35.4650 | <i>L. major</i> | 57  | 105  | 161  |
| LmjF35.4670 | <i>L. major</i> | 139 | 293  | 431  |
| LmjF35.4690 | <i>L. major</i> | 78  | 1    | 78   |
| LmjF35.4690 | <i>L. major</i> | 58  | 85   | 142  |
| LmjF35.4700 | <i>L. major</i> | 45  | 209  | 253  |
| LmjF35.4710 | <i>L. major</i> | 53  | 671  | 723  |
| LmjF35.4770 | <i>L. major</i> | 51  | 304  | 354  |
| LmjF35.4790 | <i>L. major</i> | 41  | 1    | 41   |
| LmjF35.4800 | <i>L. major</i> | 66  | 1    | 66   |
| LmjF35.4800 | <i>L. major</i> | 151 | 1323 | 1473 |
| LmjF35.4830 | <i>L. major</i> | 42  | 332  | 373  |
| LmjF35.4860 | <i>L. major</i> | 66  | 1    | 66   |
| LmjF35.4870 | <i>L. major</i> | 901 | 43   | 943  |
| LmjF35.4890 | <i>L. major</i> | 43  | 1    | 43   |
| LmjF35.4900 | <i>L. major</i> | 66  | 1    | 66   |
| LmjF35.4910 | <i>L. major</i> | 40  | 274  | 313  |
| LmjF35.4910 | <i>L. major</i> | 156 | 753  | 908  |
| LmjF35.4930 | <i>L. major</i> | 64  | 1    | 64   |
| LmjF35.4930 | <i>L. major</i> | 74  | 100  | 173  |
| LmjF35.4940 | <i>L. major</i> | 184 | 27   | 210  |
| LmjF35.4950 | <i>L. major</i> | 57  | 1    | 57   |
| LmjF35.4950 | <i>L. major</i> | 596 | 176  | 771  |
| LmjF35.4950 | <i>L. major</i> | 219 | 811  | 1029 |
| LmjF35.4960 | <i>L. major</i> | 67  | 1    | 67   |
| LmjF35.4960 | <i>L. major</i> | 46  | 105  | 150  |
| LmjF35.4960 | <i>L. major</i> | 46  | 105  | 150  |



|             |                 |     |      |      |
|-------------|-----------------|-----|------|------|
| LmjF35.5000 | <i>L. major</i> | 90  | 1    | 90   |
| LmjF35.5010 | <i>L. major</i> | 114 | 270  | 383  |
| LmjF35.5020 | <i>L. major</i> | 45  | 676  | 720  |
| LmjF35.5020 | <i>L. major</i> | 63  | 834  | 896  |
| LmjF35.5020 | <i>L. major</i> | 63  | 834  | 896  |
| LmjF35.5030 | <i>L. major</i> | 217 | 53   | 269  |
| LmjF35.5030 | <i>L. major</i> | 91  | 305  | 395  |
| LmjF35.5040 | <i>L. major</i> | 125 | 381  | 505  |
| LmjF35.5050 | <i>L. major</i> | 256 | 61   | 316  |
| LmjF35.5050 | <i>L. major</i> | 286 | 363  | 648  |
| LmjF35.5060 | <i>L. major</i> | 140 | 62   | 201  |
| LmjF35.5060 | <i>L. major</i> | 81  | 254  | 334  |
| LmjF35.5080 | <i>L. major</i> | 42  | 94   | 135  |
| LmjF35.5090 | <i>L. major</i> | 54  | 1    | 54   |
| LmjF35.5110 | <i>L. major</i> | 42  | 62   | 103  |
| LmjF35.5110 | <i>L. major</i> | 60  | 221  | 280  |
| LmjF35.5110 | <i>L. major</i> | 60  | 221  | 280  |
| LmjF35.5120 | <i>L. major</i> | 45  | 555  | 599  |
| LmjF35.5130 | <i>L. major</i> | 103 | 36   | 138  |
| LmjF35.5130 | <i>L. major</i> | 41  | 266  | 306  |
| LmjF35.5130 | <i>L. major</i> | 45  | 326  | 370  |
| LmjF35.5150 | <i>L. major</i> | 46  | 258  | 303  |
| LmjF35.5170 | <i>L. major</i> | 51  | 1    | 51   |
| LmjF35.5180 | <i>L. major</i> | 55  | 269  | 323  |
| LmjF35.5200 | <i>L. major</i> | 104 | 154  | 257  |
| LmjF35.5210 | <i>L. major</i> | 64  | 401  | 464  |
| LmjF35.5220 | <i>L. major</i> | 67  | 81   | 147  |
| LmjF35.5220 | <i>L. major</i> | 170 | 149  | 318  |
| LmjF35.5220 | <i>L. major</i> | 170 | 149  | 318  |
| LmjF35.5270 | <i>L. major</i> | 41  | 109  | 149  |
| LmjF35.5290 | <i>L. major</i> | 48  | 65   | 112  |
| LmjF35.5300 | <i>L. major</i> | 40  | 171  | 210  |
| LmjF35.5310 | <i>L. major</i> | 61  | 1    | 61   |
| LmjF35.5320 | <i>L. major</i> | 51  | 89   | 139  |
| LmjF35.5320 | <i>L. major</i> | 83  | 174  | 256  |
| LmjF35.5320 | <i>L. major</i> | 83  | 174  | 256  |
| LmjF35.5340 | <i>L. major</i> | 42  | 163  | 204  |
| LmjF35.5390 | <i>L. major</i> | 87  | 1    | 87   |
| LmjF35.5390 | <i>L. major</i> | 67  | 1463 | 1529 |
| LmjF35.5390 | <i>L. major</i> | 64  | 2455 | 2518 |
| LmjF35.5390 | <i>L. major</i> | 70  | 5084 | 5153 |
| LmjF35.5390 | <i>L. major</i> | 40  | 5941 | 5980 |
| LmjF36.0010 | <i>L. major</i> | 87  | 39   | 125  |
| LmjF36.0010 | <i>L. major</i> | 44  | 175  | 218  |
| LmjF36.0020 | <i>L. major</i> | 49  | 1    | 49   |
| LmjF36.0050 | <i>L. major</i> | 57  | 1    | 57   |
| LmjF36.0050 | <i>L. major</i> | 125 | 429  | 553  |

|             |                 |     |     |     |
|-------------|-----------------|-----|-----|-----|
| LmjF36.0050 | <i>L. major</i> | 125 | 429 | 553 |
| LmjF36.0065 | <i>L. major</i> | 64  | 12  | 75  |
| LmjF36.0065 | <i>L. major</i> | 173 | 111 | 283 |
| LmjF36.0070 | <i>L. major</i> | 49  | 102 | 150 |
| LmjF36.0100 | <i>L. major</i> | 62  | 477 | 538 |
| LmjF36.0110 | <i>L. major</i> | 52  | 234 | 285 |
| LmjF36.0110 | <i>L. major</i> | 41  | 354 | 394 |
| LmjF36.0110 | <i>L. major</i> | 41  | 515 | 555 |
| LmjF36.0130 | <i>L. major</i> | 42  | 1   | 42  |
| LmjF36.0130 | <i>L. major</i> | 159 | 98  | 256 |
| LmjF36.0140 | <i>L. major</i> | 71  | 580 | 650 |
| LmjF36.0160 | <i>L. major</i> | 48  | 238 | 285 |
| LmjF36.0170 | <i>L. major</i> | 41  | 178 | 218 |
| LmjF36.0240 | <i>L. major</i> | 83  | 1   | 83  |
| LmjF36.0240 | <i>L. major</i> | 107 | 118 | 224 |
| LmjF36.0240 | <i>L. major</i> | 107 | 118 | 224 |
| LmjF36.0250 | <i>L. major</i> | 49  | 400 | 448 |
| LmjF36.0250 | <i>L. major</i> | 86  | 548 | 633 |
| LmjF36.0270 | <i>L. major</i> | 115 | 91  | 205 |
| LmjF36.0270 | <i>L. major</i> | 50  | 216 | 265 |
| LmjF36.0270 | <i>L. major</i> | 105 | 581 | 685 |
| LmjF36.0280 | <i>L. major</i> | 41  | 27  | 67  |
| LmjF36.0280 | <i>L. major</i> | 55  | 124 | 178 |
| LmjF36.0280 | <i>L. major</i> | 61  | 192 | 252 |
| LmjF36.0300 | <i>L. major</i> | 40  | 120 | 159 |
| LmjF36.0350 | <i>L. major</i> | 53  | 1   | 53  |
| LmjF36.0350 | <i>L. major</i> | 125 | 82  | 206 |
| LmjF36.0350 | <i>L. major</i> | 47  | 330 | 376 |
| LmjF36.0360 | <i>L. major</i> | 45  | 69  | 113 |
| LmjF36.0370 | <i>L. major</i> | 81  | 1   | 81  |
| LmjF36.0370 | <i>L. major</i> | 50  | 225 | 274 |
| LmjF36.0370 | <i>L. major</i> | 49  | 326 | 374 |
| LmjF36.0380 | <i>L. major</i> | 129 | 56  | 184 |
| LmjF36.0390 | <i>L. major</i> | 114 | 1   | 114 |
| LmjF36.0390 | <i>L. major</i> | 97  | 286 | 382 |
| LmjF36.0400 | <i>L. major</i> | 65  | 42  | 106 |
| LmjF36.0400 | <i>L. major</i> | 71  | 142 | 212 |
| LmjF36.0400 | <i>L. major</i> | 98  | 280 | 377 |
| LmjF36.0410 | <i>L. major</i> | 45  | 1   | 45  |
| LmjF36.0430 | <i>L. major</i> | 62  | 19  | 80  |
| LmjF36.0430 | <i>L. major</i> | 59  | 162 | 220 |
| LmjF36.0430 | <i>L. major</i> | 59  | 162 | 220 |
| LmjF36.0450 | <i>L. major</i> | 95  | 277 | 371 |
| LmjF36.0450 | <i>L. major</i> | 411 | 409 | 819 |
| LmjF36.0470 | <i>L. major</i> | 41  | 415 | 455 |
| LmjF36.0480 | <i>L. major</i> | 45  | 15  | 59  |
| LmjF36.0490 | <i>L. major</i> | 310 | 39  | 348 |

|             |                 |     |      |      |
|-------------|-----------------|-----|------|------|
| LmjF36.0500 | <i>L. major</i> | 44  | 336  | 379  |
| LmjF36.0500 | <i>L. major</i> | 101 | 410  | 510  |
| LmjF36.0500 | <i>L. major</i> | 101 | 410  | 510  |
| LmjF36.0510 | <i>L. major</i> | 48  | 1    | 48   |
| LmjF36.0510 | <i>L. major</i> | 43  | 259  | 301  |
| LmjF36.0510 | <i>L. major</i> | 43  | 259  | 301  |
| LmjF36.0520 | <i>L. major</i> | 61  | 42   | 102  |
| LmjF36.0535 | <i>L. major</i> | 56  | 86   | 141  |
| LmjF36.0540 | <i>L. major</i> | 214 | 71   | 284  |
| LmjF36.0560 | <i>L. major</i> | 59  | 74   | 132  |
| LmjF36.0560 | <i>L. major</i> | 112 | 170  | 281  |
| LmjF36.0560 | <i>L. major</i> | 112 | 170  | 281  |
| LmjF36.0570 | <i>L. major</i> | 53  | 411  | 463  |
| LmjF36.0570 | <i>L. major</i> | 42  | 705  | 746  |
| LmjF36.0570 | <i>L. major</i> | 42  | 705  | 746  |
| LmjF36.0580 | <i>L. major</i> | 74  | 68   | 141  |
| LmjF36.0600 | <i>L. major</i> | 57  | 65   | 121  |
| LmjF36.0610 | <i>L. major</i> | 86  | 1    | 86   |
| LmjF36.0610 | <i>L. major</i> | 53  | 113  | 165  |
| LmjF36.0610 | <i>L. major</i> | 66  | 185  | 250  |
| LmjF36.0620 | <i>L. major</i> | 64  | 27   | 90   |
| LmjF36.0660 | <i>L. major</i> | 63  | 34   | 96   |
| LmjF36.0680 | <i>L. major</i> | 271 | 98   | 368  |
| LmjF36.0680 | <i>L. major</i> | 60  | 412  | 471  |
| LmjF36.0680 | <i>L. major</i> | 230 | 499  | 728  |
| LmjF36.0680 | <i>L. major</i> | 122 | 831  | 952  |
| LmjF36.0690 | <i>L. major</i> | 78  | 1    | 78   |
| LmjF36.0700 | <i>L. major</i> | 72  | 1    | 72   |
| LmjF36.0700 | <i>L. major</i> | 50  | 180  | 229  |
| LmjF36.0710 | <i>L. major</i> | 83  | 130  | 212  |
| LmjF36.0710 | <i>L. major</i> | 42  | 218  | 259  |
| LmjF36.0710 | <i>L. major</i> | 42  | 218  | 259  |
| LmjF36.0720 | <i>L. major</i> | 127 | 305  | 431  |
| LmjF36.0730 | <i>L. major</i> | 79  | 42   | 120  |
| LmjF36.0730 | <i>L. major</i> | 74  | 335  | 408  |
| LmjF36.0730 | <i>L. major</i> | 137 | 418  | 554  |
| LmjF36.0740 | <i>L. major</i> | 201 | 1    | 201  |
| LmjF36.0740 | <i>L. major</i> | 64  | 215  | 278  |
| LmjF36.0740 | <i>L. major</i> | 62  | 482  | 543  |
| LmjF36.0750 | <i>L. major</i> | 125 | 93   | 217  |
| LmjF36.0750 | <i>L. major</i> | 261 | 295  | 555  |
| LmjF36.0750 | <i>L. major</i> | 84  | 1111 | 1194 |
| LmjF36.0750 | <i>L. major</i> | 63  | 1228 | 1290 |
| LmjF36.0760 | <i>L. major</i> | 233 | 1    | 233  |
| LmjF36.0760 | <i>L. major</i> | 75  | 331  | 405  |
| LmjF36.0760 | <i>L. major</i> | 76  | 704  | 779  |
| LmjF36.0770 | <i>L. major</i> | 61  | 82   | 142  |

|             |                 |     |      |      |
|-------------|-----------------|-----|------|------|
| LmjF36.0770 | <i>L. major</i> | 64  | 154  | 217  |
| LmjF36.0770 | <i>L. major</i> | 194 | 244  | 437  |
| LmjF36.0780 | <i>L. major</i> | 127 | 1    | 127  |
| LmjF36.0780 | <i>L. major</i> | 206 | 165  | 370  |
| LmjF36.0780 | <i>L. major</i> | 60  | 663  | 722  |
| LmjF36.0780 | <i>L. major</i> | 54  | 914  | 967  |
| LmjF36.0790 | <i>L. major</i> | 134 | 1    | 134  |
| LmjF36.0790 | <i>L. major</i> | 206 | 232  | 437  |
| LmjF36.0790 | <i>L. major</i> | 120 | 442  | 561  |
| LmjF36.0800 | <i>L. major</i> | 54  | 491  | 544  |
| LmjF36.0820 | <i>L. major</i> | 61  | 45   | 105  |
| LmjF36.0830 | <i>L. major</i> | 46  | 411  | 456  |
| LmjF36.0830 | <i>L. major</i> | 154 | 528  | 681  |
| LmjF36.0830 | <i>L. major</i> | 56  | 725  | 780  |
| LmjF36.0830 | <i>L. major</i> | 100 | 814  | 913  |
| LmjF36.0830 | <i>L. major</i> | 67  | 1049 | 1115 |
| LmjF36.0830 | <i>L. major</i> | 81  | 1548 | 1628 |
| LmjF36.0830 | <i>L. major</i> | 88  | 1714 | 1801 |
| LmjF36.0840 | <i>L. major</i> | 59  | 1    | 59   |
| LmjF36.0840 | <i>L. major</i> | 69  | 387  | 455  |
| LmjF36.0840 | <i>L. major</i> | 306 | 479  | 784  |
| LmjF36.0850 | <i>L. major</i> | 280 | 25   | 304  |
| LmjF36.0850 | <i>L. major</i> | 270 | 514  | 783  |
| LmjF36.0860 | <i>L. major</i> | 74  | 317  | 390  |
| LmjF36.0860 | <i>L. major</i> | 103 | 412  | 514  |
| LmjF36.0870 | <i>L. major</i> | 76  | 121  | 196  |
| LmjF36.0870 | <i>L. major</i> | 40  | 240  | 279  |
| LmjF36.0870 | <i>L. major</i> | 45  | 832  | 876  |
| LmjF36.0900 | <i>L. major</i> | 102 | 408  | 509  |
| LmjF36.0900 | <i>L. major</i> | 96  | 557  | 652  |
| LmjF36.0910 | <i>L. major</i> | 85  | 1    | 85   |
| LmjF36.0910 | <i>L. major</i> | 79  | 121  | 199  |
| LmjF36.0910 | <i>L. major</i> | 199 | 1080 | 1278 |
| LmjF36.0920 | <i>L. major</i> | 49  | 82   | 130  |
| LmjF36.0920 | <i>L. major</i> | 81  | 396  | 476  |
| LmjF36.0920 | <i>L. major</i> | 76  | 507  | 582  |
| LmjF36.0930 | <i>L. major</i> | 66  | 153  | 218  |
| LmjF36.0940 | <i>L. major</i> | 66  | 88   | 153  |
| LmjF36.0950 | <i>L. major</i> | 75  | 497  | 571  |
| LmjF36.0950 | <i>L. major</i> | 102 | 2728 | 2829 |
| LmjF36.0950 | <i>L. major</i> | 75  | 2948 | 3022 |
| LmjF36.0960 | <i>L. major</i> | 66  | 376  | 441  |
| LmjF36.0960 | <i>L. major</i> | 82  | 549  | 630  |
| LmjF36.0960 | <i>L. major</i> | 165 | 659  | 823  |
| LmjF36.0970 | <i>L. major</i> | 63  | 46   | 108  |
| LmjF36.0980 | <i>L. major</i> | 77  | 92   | 168  |
| LmjF36.0990 | <i>L. major</i> | 77  | 92   | 168  |

|             |                 |     |      |      |
|-------------|-----------------|-----|------|------|
| LmjF36.1000 | <i>L. major</i> | 50  | 626  | 675  |
| LmjF36.1010 | <i>L. major</i> | 46  | 304  | 349  |
| LmjF36.1010 | <i>L. major</i> | 46  | 368  | 413  |
| LmjF36.1010 | <i>L. major</i> | 41  | 526  | 566  |
| LmjF36.1010 | <i>L. major</i> | 40  | 586  | 625  |
| LmjF36.1010 | <i>L. major</i> | 70  | 744  | 813  |
| LmjF36.1010 | <i>L. major</i> | 45  | 1160 | 1204 |
| LmjF36.1010 | <i>L. major</i> | 41  | 1261 | 1301 |
| LmjF36.1020 | <i>L. major</i> | 72  | 87   | 158  |
| LmjF36.1030 | <i>L. major</i> | 96  | 1    | 96   |
| LmjF36.1030 | <i>L. major</i> | 121 | 107  | 227  |
| LmjF36.1030 | <i>L. major</i> | 135 | 302  | 436  |
| LmjF36.1030 | <i>L. major</i> | 50  | 470  | 519  |
| LmjF36.1030 | <i>L. major</i> | 62  | 526  | 587  |
| LmjF36.1030 | <i>L. major</i> | 72  | 792  | 863  |
| LmjF36.1030 | <i>L. major</i> | 66  | 1123 | 1188 |
| LmjF36.1030 | <i>L. major</i> | 42  | 1605 | 1646 |
| LmjF36.1040 | <i>L. major</i> | 63  | 168  | 230  |
| LmjF36.1040 | <i>L. major</i> | 49  | 238  | 286  |
| LmjF36.1040 | <i>L. major</i> | 49  | 238  | 286  |
| LmjF36.1050 | <i>L. major</i> | 133 | 1    | 133  |
| LmjF36.1050 | <i>L. major</i> | 41  | 416  | 456  |
| LmjF36.1050 | <i>L. major</i> | 47  | 541  | 587  |
| LmjF36.1060 | <i>L. major</i> | 141 | 122  | 262  |
| LmjF36.1060 | <i>L. major</i> | 74  | 392  | 465  |
| LmjF36.1060 | <i>L. major</i> | 104 | 569  | 672  |
| LmjF36.1060 | <i>L. major</i> | 126 | 706  | 831  |
| LmjF36.1060 | <i>L. major</i> | 49  | 887  | 935  |
| LmjF36.1070 | <i>L. major</i> | 64  | 61   | 124  |
| LmjF36.1080 | <i>L. major</i> | 58  | 251  | 308  |
| LmjF36.1100 | <i>L. major</i> | 64  | 61   | 124  |
| LmjF36.1110 | <i>L. major</i> | 61  | 247  | 307  |
| LmjF36.1110 | <i>L. major</i> | 46  | 322  | 367  |
| LmjF36.1110 | <i>L. major</i> | 46  | 322  | 367  |
| LmjF36.1120 | <i>L. major</i> | 66  | 59   | 124  |
| LmjF36.1150 | <i>L. major</i> | 66  | 1    | 66   |
| LmjF36.1150 | <i>L. major</i> | 254 | 82   | 335  |
| LmjF36.1150 | <i>L. major</i> | 96  | 349  | 444  |
| LmjF36.1150 | <i>L. major</i> | 110 | 590  | 699  |
| LmjF36.1150 | <i>L. major</i> | 70  | 706  | 775  |
| LmjF36.1150 | <i>L. major</i> | 55  | 824  | 878  |
| LmjF36.1160 | <i>L. major</i> | 50  | 1    | 50   |
| LmjF36.1170 | <i>L. major</i> | 53  | 62   | 114  |
| LmjF36.1170 | <i>L. major</i> | 64  | 160  | 223  |
| LmjF36.1170 | <i>L. major</i> | 76  | 285  | 360  |
| LmjF36.1210 | <i>L. major</i> | 49  | 164  | 212  |
| LmjF36.1220 | <i>L. major</i> | 101 | 1    | 101  |

|             |                 |     |      |      |
|-------------|-----------------|-----|------|------|
| LmjF36.1220 | <i>L. major</i> | 98  | 138  | 235  |
| LmjF36.1220 | <i>L. major</i> | 248 | 249  | 496  |
| LmjF36.1230 | <i>L. major</i> | 70  | 175  | 244  |
| LmjF36.1240 | <i>L. major</i> | 82  | 163  | 244  |
| LmjF36.1260 | <i>L. major</i> | 50  | 322  | 371  |
| LmjF36.1265 | <i>L. major</i> | 59  | 76   | 134  |
| LmjF36.1280 | <i>L. major</i> | 57  | 44   | 100  |
| LmjF36.1280 | <i>L. major</i> | 44  | 278  | 321  |
| LmjF36.1280 | <i>L. major</i> | 44  | 278  | 321  |
| LmjF36.1290 | <i>L. major</i> | 113 | 174  | 286  |
| LmjF36.1300 | <i>L. major</i> | 122 | 89   | 210  |
| LmjF36.1300 | <i>L. major</i> | 84  | 399  | 482  |
| LmjF36.1310 | <i>L. major</i> | 156 | 102  | 257  |
| LmjF36.1320 | <i>L. major</i> | 196 | 1    | 196  |
| LmjF36.1320 | <i>L. major</i> | 154 | 269  | 422  |
| LmjF36.1330 | <i>L. major</i> | 41  | 1    | 41   |
| LmjF36.1330 | <i>L. major</i> | 74  | 70   | 143  |
| LmjF36.1330 | <i>L. major</i> | 74  | 70   | 143  |
| LmjF36.1350 | <i>L. major</i> | 46  | 31   | 76   |
| LmjF36.1350 | <i>L. major</i> | 82  | 153  | 234  |
| LmjF36.1350 | <i>L. major</i> | 46  | 240  | 285  |
| LmjF36.1370 | <i>L. major</i> | 48  | 265  | 312  |
| LmjF36.1370 | <i>L. major</i> | 94  | 691  | 784  |
| LmjF36.1370 | <i>L. major</i> | 94  | 691  | 784  |
| LmjF36.1380 | <i>L. major</i> | 80  | 1    | 80   |
| LmjF36.1390 | <i>L. major</i> | 78  | 67   | 144  |
| LmjF36.1390 | <i>L. major</i> | 58  | 173  | 230  |
| LmjF36.1390 | <i>L. major</i> | 119 | 260  | 378  |
| LmjF36.1390 | <i>L. major</i> | 204 | 449  | 652  |
| LmjF36.1390 | <i>L. major</i> | 252 | 838  | 1089 |
| LmjF36.1395 | <i>L. major</i> | 47  | 36   | 82   |
| LmjF36.1400 | <i>L. major</i> | 55  | 142  | 196  |
| LmjF36.1400 | <i>L. major</i> | 245 | 199  | 443  |
| LmjF36.1410 | <i>L. major</i> | 130 | 104  | 233  |
| LmjF36.1410 | <i>L. major</i> | 56  | 466  | 521  |
| LmjF36.1410 | <i>L. major</i> | 49  | 661  | 709  |
| LmjF36.1410 | <i>L. major</i> | 45  | 809  | 853  |
| LmjF36.1420 | <i>L. major</i> | 69  | 41   | 109  |
| LmjF36.1420 | <i>L. major</i> | 47  | 181  | 227  |
| LmjF36.1420 | <i>L. major</i> | 47  | 181  | 227  |
| LmjF36.1430 | <i>L. major</i> | 70  | 59   | 128  |
| LmjF36.1440 | <i>L. major</i> | 42  | 55   | 96   |
| LmjF36.1440 | <i>L. major</i> | 69  | 141  | 209  |
| LmjF36.1440 | <i>L. major</i> | 60  | 839  | 898  |
| LmjF36.1440 | <i>L. major</i> | 75  | 920  | 994  |
| LmjF36.1440 | <i>L. major</i> | 121 | 1815 | 1935 |
| LmjF36.1440 | <i>L. major</i> | 80  | 2056 | 2135 |

|             |                 |     |      |      |
|-------------|-----------------|-----|------|------|
| LmjF36.1440 | <i>L. major</i> | 67  | 2214 | 2280 |
| LmjF36.1440 | <i>L. major</i> | 79  | 2347 | 2425 |
| LmjF36.1440 | <i>L. major</i> | 40  | 2684 | 2723 |
| LmjF36.1440 | <i>L. major</i> | 46  | 3063 | 3108 |
| LmjF36.1440 | <i>L. major</i> | 77  | 3245 | 3321 |
| LmjF36.1440 | <i>L. major</i> | 59  | 3778 | 3836 |
| LmjF36.1440 | <i>L. major</i> | 53  | 4072 | 4124 |
| LmjF36.1440 | <i>L. major</i> | 53  | 4150 | 4202 |
| LmjF36.1440 | <i>L. major</i> | 41  | 4550 | 4590 |
| LmjF36.1440 | <i>L. major</i> | 41  | 5068 | 5108 |
| LmjF36.1440 | <i>L. major</i> | 40  | 5229 | 5268 |
| LmjF36.1460 | <i>L. major</i> | 196 | 1    | 196  |
| LmjF36.1460 | <i>L. major</i> | 131 | 208  | 338  |
| LmjF36.1460 | <i>L. major</i> | 316 | 340  | 655  |
| LmjF36.1470 | <i>L. major</i> | 57  | 1    | 57   |
| LmjF36.1470 | <i>L. major</i> | 111 | 385  | 495  |
| LmjF36.1470 | <i>L. major</i> | 65  | 552  | 616  |
| LmjF36.1470 | <i>L. major</i> | 49  | 626  | 674  |
| LmjF36.1470 | <i>L. major</i> | 52  | 747  | 798  |
| LmjF36.1470 | <i>L. major</i> | 98  | 834  | 931  |
| LmjF36.1480 | <i>L. major</i> | 82  | 46   | 127  |
| LmjF36.1480 | <i>L. major</i> | 44  | 242  | 285  |
| LmjF36.1480 | <i>L. major</i> | 44  | 242  | 285  |
| LmjF36.1490 | <i>L. major</i> | 554 | 1    | 554  |
| LmjF36.1490 | <i>L. major</i> | 133 | 563  | 695  |
| LmjF36.1490 | <i>L. major</i> | 365 | 698  | 1062 |
| LmjF36.1490 | <i>L. major</i> | 104 | 1099 | 1202 |
| LmjF36.1500 | <i>L. major</i> | 146 | 223  | 368  |
| LmjF36.1500 | <i>L. major</i> | 46  | 554  | 599  |
| LmjF36.1500 | <i>L. major</i> | 42  | 759  | 800  |
| LmjF36.1500 | <i>L. major</i> | 116 | 831  | 946  |
| LmjF36.1510 | <i>L. major</i> | 94  | 1    | 94   |
| LmjF36.1520 | <i>L. major</i> | 44  | 324  | 367  |
| LmjF36.1530 | <i>L. major</i> | 53  | 318  | 370  |
| LmjF36.1540 | <i>L. major</i> | 488 | 1    | 488  |
| LmjF36.1540 | <i>L. major</i> | 99  | 558  | 656  |
| LmjF36.1550 | <i>L. major</i> | 71  | 1    | 71   |
| LmjF36.1550 | <i>L. major</i> | 50  | 380  | 429  |
| LmjF36.1550 | <i>L. major</i> | 47  | 519  | 565  |
| LmjF36.1550 | <i>L. major</i> | 76  | 585  | 660  |
| LmjF36.1550 | <i>L. major</i> | 112 | 737  | 848  |
| LmjF36.1560 | <i>L. major</i> | 130 | 278  | 407  |
| LmjF36.1570 | <i>L. major</i> | 437 | 40   | 476  |
| LmjF36.1580 | <i>L. major</i> | 86  | 1    | 86   |
| LmjF36.1580 | <i>L. major</i> | 62  | 179  | 240  |
| LmjF36.1580 | <i>L. major</i> | 56  | 467  | 522  |
| LmjF36.1580 | <i>L. major</i> | 74  | 579  | 652  |

|             |                 |     |      |      |
|-------------|-----------------|-----|------|------|
| LmjF36.1580 | <i>L. major</i> | 278 | 697  | 974  |
| LmjF36.1580 | <i>L. major</i> | 70  | 1251 | 1320 |
| LmjF36.1580 | <i>L. major</i> | 55  | 1419 | 1473 |
| LmjF36.1580 | <i>L. major</i> | 106 | 1530 | 1635 |
| LmjF36.1590 | <i>L. major</i> | 92  | 1    | 92   |
| LmjF36.1590 | <i>L. major</i> | 129 | 1065 | 1193 |
| LmjF36.1595 | <i>L. major</i> | 123 | 1    | 123  |
| LmjF36.1610 | <i>L. major</i> | 115 | 1    | 115  |
| LmjF36.1620 | <i>L. major</i> | 64  | 1    | 64   |
| LmjF36.1620 | <i>L. major</i> | 110 | 66   | 175  |
| LmjF36.1620 | <i>L. major</i> | 110 | 66   | 175  |
| LmjF36.1630 | <i>L. major</i> | 60  | 1621 | 1680 |
| LmjF36.1635 | <i>L. major</i> | 135 | 1    | 135  |
| LmjF36.1640 | <i>L. major</i> | 271 | 1    | 271  |
| LmjF36.1650 | <i>L. major</i> | 46  | 27   | 72   |
| LmjF36.1660 | <i>L. major</i> | 278 | 18   | 295  |
| LmjF36.1660 | <i>L. major</i> | 91  | 596  | 686  |
| LmjF36.1670 | <i>L. major</i> | 41  | 144  | 184  |
| LmjF36.1670 | <i>L. major</i> | 48  | 367  | 414  |
| LmjF36.1670 | <i>L. major</i> | 48  | 367  | 414  |
| LmjF36.1680 | <i>L. major</i> | 51  | 17   | 67   |
| LmjF36.1680 | <i>L. major</i> | 56  | 229  | 284  |
| LmjF36.1680 | <i>L. major</i> | 70  | 321  | 390  |
| LmjF36.1680 | <i>L. major</i> | 84  | 512  | 595  |
| LmjF36.1680 | <i>L. major</i> | 76  | 630  | 705  |
| LmjF36.1690 | <i>L. major</i> | 46  | 137  | 182  |
| LmjF36.1700 | <i>L. major</i> | 390 | 38   | 427  |
| LmjF36.1700 | <i>L. major</i> | 55  | 457  | 511  |
| LmjF36.1710 | <i>L. major</i> | 70  | 1    | 70   |
| LmjF36.1720 | <i>L. major</i> | 115 | 13   | 127  |
| LmjF36.1720 | <i>L. major</i> | 45  | 292  | 336  |
| LmjF36.1720 | <i>L. major</i> | 100 | 390  | 489  |
| LmjF36.1720 | <i>L. major</i> | 80  | 552  | 631  |
| LmjF36.1720 | <i>L. major</i> | 42  | 813  | 854  |
| LmjF36.1720 | <i>L. major</i> | 110 | 890  | 999  |
| LmjF36.1720 | <i>L. major</i> | 73  | 1078 | 1150 |
| LmjF36.1720 | <i>L. major</i> | 61  | 1458 | 1518 |
| LmjF36.1720 | <i>L. major</i> | 40  | 2123 | 2162 |
| LmjF36.1720 | <i>L. major</i> | 80  | 2289 | 2368 |
| LmjF36.1720 | <i>L. major</i> | 46  | 2601 | 2646 |
| LmjF36.1720 | <i>L. major</i> | 71  | 2875 | 2945 |
| LmjF36.1720 | <i>L. major</i> | 60  | 3071 | 3130 |
| LmjF36.1720 | <i>L. major</i> | 58  | 3229 | 3286 |
| LmjF36.1720 | <i>L. major</i> | 47  | 3365 | 3411 |
| LmjF36.1720 | <i>L. major</i> | 114 | 3968 | 4081 |
| LmjF36.1730 | <i>L. major</i> | 60  | 44   | 103  |
| LmjF36.1730 | <i>L. major</i> | 57  | 262  | 318  |



|             |                 |     |      |      |
|-------------|-----------------|-----|------|------|
| LmjF36.1730 | <i>L. major</i> | 64  | 704  | 767  |
| LmjF36.1730 | <i>L. major</i> | 148 | 804  | 951  |
| LmjF36.1740 | <i>L. major</i> | 67  | 1    | 67   |
| LmjF36.1740 | <i>L. major</i> | 41  | 69   | 109  |
| LmjF36.1740 | <i>L. major</i> | 99  | 223  | 321  |
| LmjF36.1740 | <i>L. major</i> | 41  | 746  | 786  |
| LmjF36.1740 | <i>L. major</i> | 48  | 799  | 846  |
| LmjF36.1740 | <i>L. major</i> | 72  | 953  | 1024 |
| LmjF36.1740 | <i>L. major</i> | 58  | 1092 | 1149 |
| LmjF36.1750 | <i>L. major</i> | 74  | 167  | 240  |
| LmjF36.1780 | <i>L. major</i> | 129 | 103  | 231  |
| LmjF36.1780 | <i>L. major</i> | 45  | 354  | 398  |
| LmjF36.1780 | <i>L. major</i> | 83  | 635  | 717  |
| LmjF36.1790 | <i>L. major</i> | 47  | 91   | 137  |
| LmjF36.1790 | <i>L. major</i> | 258 | 638  | 895  |
| LmjF36.1800 | <i>L. major</i> | 184 | 53   | 236  |
| LmjF36.1810 | <i>L. major</i> | 43  | 1    | 43   |
| LmjF36.1810 | <i>L. major</i> | 49  | 169  | 217  |
| LmjF36.1810 | <i>L. major</i> | 56  | 336  | 391  |
| LmjF36.1810 | <i>L. major</i> | 77  | 643  | 719  |
| LmjF36.1820 | <i>L. major</i> | 164 | 152  | 315  |
| LmjF36.1820 | <i>L. major</i> | 56  | 345  | 400  |
| LmjF36.1820 | <i>L. major</i> | 415 | 459  | 873  |
| LmjF36.1830 | <i>L. major</i> | 92  | 1    | 92   |
| LmjF36.1830 | <i>L. major</i> | 478 | 125  | 602  |
| LmjF36.1840 | <i>L. major</i> | 158 | 1    | 158  |
| LmjF36.1840 | <i>L. major</i> | 54  | 604  | 657  |
| LmjF36.1850 | <i>L. major</i> | 53  | 1    | 53   |
| LmjF36.1850 | <i>L. major</i> | 106 | 422  | 527  |
| LmjF36.1860 | <i>L. major</i> | 53  | 358  | 410  |
| LmjF36.1870 | <i>L. major</i> | 135 | 666  | 800  |
| LmjF36.1880 | <i>L. major</i> | 41  | 198  | 238  |
| LmjF36.1880 | <i>L. major</i> | 54  | 380  | 433  |
| LmjF36.1900 | <i>L. major</i> | 72  | 1    | 72   |
| LmjF36.1900 | <i>L. major</i> | 48  | 920  | 967  |
| LmjF36.1900 | <i>L. major</i> | 335 | 972  | 1306 |
| LmjF36.1900 | <i>L. major</i> | 223 | 1348 | 1570 |
| LmjF36.1900 | <i>L. major</i> | 69  | 1587 | 1655 |
| LmjF36.1905 | <i>L. major</i> | 255 | 1    | 255  |
| LmjF36.1905 | <i>L. major</i> | 125 | 290  | 414  |
| LmjF36.1910 | <i>L. major</i> | 150 | 66   | 215  |
| LmjF36.1910 | <i>L. major</i> | 131 | 256  | 386  |
| LmjF36.1920 | <i>L. major</i> | 40  | 149  | 188  |
| LmjF36.1920 | <i>L. major</i> | 45  | 452  | 496  |
| LmjF36.1920 | <i>L. major</i> | 45  | 452  | 496  |
| LmjF36.1930 | <i>L. major</i> | 106 | 71   | 176  |
| LmjF36.1930 | <i>L. major</i> | 50  | 227  | 276  |

|             |                 |     |      |      |
|-------------|-----------------|-----|------|------|
| LmjF36.1940 | <i>L. major</i> | 55  | 254  | 308  |
| LmjF36.1950 | <i>L. major</i> | 41  | 554  | 594  |
| LmjF36.1955 | <i>L. major</i> | 46  | 62   | 107  |
| LmjF36.1955 | <i>L. major</i> | 40  | 344  | 383  |
| LmjF36.1955 | <i>L. major</i> | 40  | 344  | 383  |
| LmjF36.1970 | <i>L. major</i> | 61  | 1    | 61   |
| LmjF36.2000 | <i>L. major</i> | 76  | 1038 | 1113 |
| LmjF36.2000 | <i>L. major</i> | 100 | 1143 | 1242 |
| LmjF36.2010 | <i>L. major</i> | 184 | 1    | 184  |
| LmjF36.2010 | <i>L. major</i> | 103 | 186  | 288  |
| LmjF36.2010 | <i>L. major</i> | 103 | 186  | 288  |
| LmjF36.2020 | <i>L. major</i> | 40  | 346  | 385  |
| LmjF36.2035 | <i>L. major</i> | 50  | 1    | 50   |
| LmjF36.2035 | <i>L. major</i> | 45  | 93   | 137  |
| LmjF36.2035 | <i>L. major</i> | 55  | 173  | 227  |
| LmjF36.2035 | <i>L. major</i> | 52  | 242  | 293  |
| LmjF36.2035 | <i>L. major</i> | 136 | 382  | 517  |
| LmjF36.2035 | <i>L. major</i> | 70  | 527  | 596  |
| LmjF36.2040 | <i>L. major</i> | 42  | 406  | 447  |
| LmjF36.2050 | <i>L. major</i> | 146 | 1    | 146  |
| LmjF36.2050 | <i>L. major</i> | 49  | 381  | 429  |
| LmjF36.2050 | <i>L. major</i> | 66  | 504  | 569  |
| LmjF36.2050 | <i>L. major</i> | 119 | 595  | 713  |
| LmjF36.2060 | <i>L. major</i> | 48  | 1    | 48   |
| LmjF36.2060 | <i>L. major</i> | 53  | 247  | 299  |
| LmjF36.2060 | <i>L. major</i> | 108 | 399  | 506  |
| LmjF36.2070 | <i>L. major</i> | 149 | 124  | 272  |
| LmjF36.2080 | <i>L. major</i> | 420 | 50   | 469  |
| LmjF36.2080 | <i>L. major</i> | 200 | 513  | 712  |
| LmjF36.2080 | <i>L. major</i> | 488 | 801  | 1288 |
| LmjF36.2090 | <i>L. major</i> | 49  | 198  | 246  |
| LmjF36.2090 | <i>L. major</i> | 235 | 364  | 598  |
| LmjF36.2090 | <i>L. major</i> | 51  | 626  | 676  |
| LmjF36.2090 | <i>L. major</i> | 65  | 686  | 750  |
| LmjF36.2100 | <i>L. major</i> | 74  | 72   | 145  |
| LmjF36.2110 | <i>L. major</i> | 49  | 68   | 116  |
| LmjF36.2110 | <i>L. major</i> | 46  | 227  | 272  |
| LmjF36.2110 | <i>L. major</i> | 46  | 227  | 272  |
| LmjF36.2115 | <i>L. major</i> | 237 | 133  | 369  |
| LmjF36.2115 | <i>L. major</i> | 178 | 395  | 572  |
| LmjF36.2115 | <i>L. major</i> | 43  | 617  | 659  |
| LmjF36.2120 | <i>L. major</i> | 261 | 1    | 261  |
| LmjF36.2120 | <i>L. major</i> | 46  | 283  | 328  |
| LmjF36.2120 | <i>L. major</i> | 179 | 345  | 523  |
| LmjF36.2120 | <i>L. major</i> | 791 | 560  | 1350 |
| LmjF36.2120 | <i>L. major</i> | 128 | 1406 | 1533 |
| LmjF36.2130 | <i>L. major</i> | 51  | 1    | 51   |

|             |                 |     |      |      |
|-------------|-----------------|-----|------|------|
| LmjF36.2130 | <i>L. major</i> | 83  | 491  | 573  |
| LmjF36.2170 | <i>L. major</i> | 78  | 479  | 556  |
| LmjF36.2180 | <i>L. major</i> | 75  | 1    | 75   |
| LmjF36.2180 | <i>L. major</i> | 71  | 124  | 194  |
| LmjF36.2180 | <i>L. major</i> | 42  | 376  | 417  |
| LmjF36.2190 | <i>L. major</i> | 244 | 1    | 244  |
| LmjF36.2190 | <i>L. major</i> | 320 | 267  | 586  |
| LmjF36.2200 | <i>L. major</i> | 86  | 46   | 131  |
| LmjF36.2200 | <i>L. major</i> | 187 | 457  | 643  |
| LmjF36.2210 | <i>L. major</i> | 47  | 1    | 47   |
| LmjF36.2220 | <i>L. major</i> | 71  | 161  | 231  |
| LmjF36.2220 | <i>L. major</i> | 137 | 239  | 375  |
| LmjF36.2230 | <i>L. major</i> | 41  | 134  | 174  |
| LmjF36.2240 | <i>L. major</i> | 61  | 1    | 61   |
| LmjF36.2240 | <i>L. major</i> | 77  | 218  | 294  |
| LmjF36.2240 | <i>L. major</i> | 66  | 327  | 392  |
| LmjF36.2240 | <i>L. major</i> | 47  | 434  | 480  |
| LmjF36.2240 | <i>L. major</i> | 50  | 520  | 569  |
| LmjF36.2240 | <i>L. major</i> | 61  | 808  | 868  |
| LmjF36.2240 | <i>L. major</i> | 233 | 1082 | 1314 |
| LmjF36.2240 | <i>L. major</i> | 153 | 1339 | 1491 |
| LmjF36.2240 | <i>L. major</i> | 78  | 1530 | 1607 |
| LmjF36.2240 | <i>L. major</i> | 133 | 1633 | 1765 |
| LmjF36.2240 | <i>L. major</i> | 71  | 1954 | 2024 |
| LmjF36.2240 | <i>L. major</i> | 313 | 2182 | 2494 |
| LmjF36.2260 | <i>L. major</i> | 70  | 173  | 242  |
| LmjF36.2270 | <i>L. major</i> | 65  | 201  | 265  |
| LmjF36.2280 | <i>L. major</i> | 52  | 1    | 52   |
| LmjF36.2280 | <i>L. major</i> | 55  | 441  | 495  |
| LmjF36.2280 | <i>L. major</i> | 55  | 441  | 495  |
| LmjF36.2290 | <i>L. major</i> | 51  | 19   | 69   |
| LmjF36.2290 | <i>L. major</i> | 41  | 119  | 159  |
| LmjF36.2290 | <i>L. major</i> | 86  | 391  | 476  |
| LmjF36.2300 | <i>L. major</i> | 165 | 314  | 478  |
| LmjF36.2310 | <i>L. major</i> | 93  | 233  | 325  |
| LmjF36.2330 | <i>L. major</i> | 52  | 1    | 52   |
| LmjF36.2340 | <i>L. major</i> | 100 | 241  | 340  |
| LmjF36.2360 | <i>L. major</i> | 77  | 1    | 77   |
| LmjF36.2370 | <i>L. major</i> | 80  | 1    | 80   |
| LmjF36.2370 | <i>L. major</i> | 54  | 152  | 205  |
| LmjF36.2370 | <i>L. major</i> | 41  | 222  | 262  |
| LmjF36.2370 | <i>L. major</i> | 75  | 350  | 424  |
| LmjF36.2370 | <i>L. major</i> | 66  | 455  | 520  |
| LmjF36.2370 | <i>L. major</i> | 87  | 726  | 812  |
| LmjF36.2380 | <i>L. major</i> | 47  | 1    | 47   |
| LmjF36.2390 | <i>L. major</i> | 47  | 1    | 47   |
| LmjF36.2410 | <i>L. major</i> | 58  | 131  | 188  |

|             |                 |     |      |      |
|-------------|-----------------|-----|------|------|
| LmjF36.2410 | <i>L. major</i> | 110 | 275  | 384  |
| LmjF36.2410 | <i>L. major</i> | 99  | 424  | 522  |
| LmjF36.2410 | <i>L. major</i> | 273 | 741  | 1013 |
| LmjF36.2410 | <i>L. major</i> | 71  | 1317 | 1387 |
| LmjF36.2410 | <i>L. major</i> | 69  | 1468 | 1536 |
| LmjF36.2410 | <i>L. major</i> | 105 | 1548 | 1652 |
| LmjF36.2410 | <i>L. major</i> | 103 | 1758 | 1860 |
| LmjF36.2430 | <i>L. major</i> | 116 | 29   | 144  |
| LmjF36.2440 | <i>L. major</i> | 173 | 22   | 194  |
| LmjF36.2450 | <i>L. major</i> | 106 | 204  | 309  |
| LmjF36.2460 | <i>L. major</i> | 61  | 267  | 327  |
| LmjF36.2460 | <i>L. major</i> | 41  | 544  | 584  |
| LmjF36.2460 | <i>L. major</i> | 41  | 544  | 584  |
| LmjF36.2480 | <i>L. major</i> | 51  | 79   | 129  |
| LmjF36.2480 | <i>L. major</i> | 108 | 152  | 259  |
| LmjF36.2480 | <i>L. major</i> | 108 | 152  | 259  |
| LmjF36.2490 | <i>L. major</i> | 206 | 1    | 206  |
| LmjF36.2500 | <i>L. major</i> | 41  | 335  | 375  |
| LmjF36.2500 | <i>L. major</i> | 48  | 440  | 487  |
| LmjF36.2500 | <i>L. major</i> | 81  | 594  | 674  |
| LmjF36.2510 | <i>L. major</i> | 102 | 1    | 102  |
| LmjF36.2510 | <i>L. major</i> | 43  | 214  | 256  |
| LmjF36.2510 | <i>L. major</i> | 49  | 701  | 749  |
| LmjF36.2520 | <i>L. major</i> | 140 | 107  | 246  |
| LmjF36.2520 | <i>L. major</i> | 43  | 308  | 350  |
| LmjF36.2530 | <i>L. major</i> | 99  | 1    | 99   |
| LmjF36.2530 | <i>L. major</i> | 45  | 422  | 466  |
| LmjF36.2530 | <i>L. major</i> | 42  | 661  | 702  |
| LmjF36.2550 | <i>L. major</i> | 42  | 1    | 42   |
| LmjF36.2550 | <i>L. major</i> | 70  | 85   | 154  |
| LmjF36.2550 | <i>L. major</i> | 66  | 271  | 336  |
| LmjF36.2560 | <i>L. major</i> | 59  | 120  | 178  |
| LmjF36.2560 | <i>L. major</i> | 62  | 865  | 926  |
| LmjF36.2560 | <i>L. major</i> | 62  | 865  | 926  |
| LmjF36.2580 | <i>L. major</i> | 51  | 242  | 292  |
| LmjF36.2580 | <i>L. major</i> | 68  | 372  | 439  |
| LmjF36.2580 | <i>L. major</i> | 49  | 724  | 772  |
| LmjF36.2580 | <i>L. major</i> | 44  | 892  | 935  |
| LmjF36.2590 | <i>L. major</i> | 41  | 465  | 505  |
| LmjF36.2600 | <i>L. major</i> | 90  | 153  | 242  |
| LmjF36.2600 | <i>L. major</i> | 40  | 332  | 371  |
| LmjF36.2600 | <i>L. major</i> | 64  | 538  | 601  |
| LmjF36.2600 | <i>L. major</i> | 41  | 662  | 702  |
| LmjF36.2610 | <i>L. major</i> | 86  | 1    | 86   |
| LmjF36.2620 | <i>L. major</i> | 201 | 1    | 201  |
| LmjF36.2620 | <i>L. major</i> | 69  | 565  | 633  |
| LmjF36.2620 | <i>L. major</i> | 116 | 707  | 822  |

|             |                 |     |      |      |
|-------------|-----------------|-----|------|------|
| LmjF36.2620 | <i>L. major</i> | 50  | 905  | 954  |
| LmjF36.2620 | <i>L. major</i> | 44  | 1290 | 1333 |
| LmjF36.2620 | <i>L. major</i> | 141 | 1452 | 1592 |
| LmjF36.2630 | <i>L. major</i> | 80  | 1    | 80   |
| LmjF36.2630 | <i>L. major</i> | 93  | 146  | 238  |
| LmjF36.2630 | <i>L. major</i> | 139 | 300  | 438  |
| LmjF36.2630 | <i>L. major</i> | 82  | 465  | 546  |
| LmjF36.2630 | <i>L. major</i> | 51  | 624  | 674  |
| LmjF36.2630 | <i>L. major</i> | 85  | 729  | 813  |
| LmjF36.2630 | <i>L. major</i> | 108 | 845  | 952  |
| LmjF36.2630 | <i>L. major</i> | 91  | 1015 | 1105 |
| LmjF36.2630 | <i>L. major</i> | 77  | 1162 | 1238 |
| LmjF36.2630 | <i>L. major</i> | 46  | 1307 | 1352 |
| LmjF36.2630 | <i>L. major</i> | 59  | 1477 | 1535 |
| LmjF36.2630 | <i>L. major</i> | 53  | 1698 | 1750 |
| LmjF36.2630 | <i>L. major</i> | 41  | 1840 | 1880 |
| LmjF36.2630 | <i>L. major</i> | 62  | 1992 | 2053 |
| LmjF36.2630 | <i>L. major</i> | 303 | 2147 | 2449 |
| LmjF36.2630 | <i>L. major</i> | 237 | 2453 | 2689 |
| LmjF36.2630 | <i>L. major</i> | 54  | 2734 | 2787 |
| LmjF36.2630 | <i>L. major</i> | 64  | 2822 | 2885 |
| LmjF36.2630 | <i>L. major</i> | 70  | 2917 | 2986 |
| LmjF36.2630 | <i>L. major</i> | 52  | 3252 | 3303 |
| LmjF36.2630 | <i>L. major</i> | 67  | 3351 | 3417 |
| LmjF36.2650 | <i>L. major</i> | 103 | 101  | 203  |
| LmjF36.2660 | <i>L. major</i> | 132 | 100  | 231  |
| LmjF36.2670 | <i>L. major</i> | 54  | 20   | 73   |
| LmjF36.2670 | <i>L. major</i> | 41  | 140  | 180  |
| LmjF36.2670 | <i>L. major</i> | 68  | 325  | 392  |
| LmjF36.2685 | <i>L. major</i> | 114 | 42   | 155  |
| LmjF36.2690 | <i>L. major</i> | 41  | 44   | 84   |
| LmjF36.2690 | <i>L. major</i> | 44  | 152  | 195  |
| LmjF36.2690 | <i>L. major</i> | 46  | 213  | 258  |
| LmjF36.2690 | <i>L. major</i> | 62  | 278  | 339  |
| LmjF36.2700 | <i>L. major</i> | 146 | 1    | 146  |
| LmjF36.2700 | <i>L. major</i> | 271 | 378  | 648  |
| LmjF36.2700 | <i>L. major</i> | 59  | 1380 | 1438 |
| LmjF36.2710 | <i>L. major</i> | 52  | 520  | 571  |
| LmjF36.2740 | <i>L. major</i> | 55  | 306  | 360  |
| LmjF36.2740 | <i>L. major</i> | 43  | 977  | 1019 |
| LmjF36.2740 | <i>L. major</i> | 43  | 977  | 1019 |
| LmjF36.2760 | <i>L. major</i> | 50  | 310  | 359  |
| LmjF36.2770 | <i>L. major</i> | 607 | 1    | 607  |
| LmjF36.2790 | <i>L. major</i> | 40  | 506  | 545  |
| LmjF36.2790 | <i>L. major</i> | 42  | 1331 | 1372 |
| LmjF36.2790 | <i>L. major</i> | 48  | 2078 | 2125 |
| LmjF36.2790 | <i>L. major</i> | 60  | 2531 | 2590 |

|             |                 |     |      |      |
|-------------|-----------------|-----|------|------|
| LmjF36.2800 | <i>L. major</i> | 51  | 30   | 80   |
| LmjF36.2800 | <i>L. major</i> | 305 | 115  | 419  |
| LmjF36.2800 | <i>L. major</i> | 102 | 502  | 603  |
| LmjF36.2810 | <i>L. major</i> | 62  | 94   | 155  |
| LmjF36.2810 | <i>L. major</i> | 98  | 329  | 426  |
| LmjF36.2810 | <i>L. major</i> | 63  | 525  | 587  |
| LmjF36.2820 | <i>L. major</i> | 212 | 380  | 591  |
| LmjF36.2830 | <i>L. major</i> | 61  | 46   | 106  |
| LmjF36.2830 | <i>L. major</i> | 251 | 155  | 405  |
| LmjF36.2840 | <i>L. major</i> | 138 | 38   | 175  |
| LmjF36.2860 | <i>L. major</i> | 45  | 93   | 137  |
| LmjF36.2870 | <i>L. major</i> | 45  | 93   | 137  |
| LmjF36.2880 | <i>L. major</i> | 77  | 464  | 540  |
| LmjF36.2880 | <i>L. major</i> | 84  | 1527 | 1610 |
| LmjF36.2880 | <i>L. major</i> | 46  | 1672 | 1717 |
| LmjF36.2890 | <i>L. major</i> | 48  | 1    | 48   |
| LmjF36.2890 | <i>L. major</i> | 78  | 308  | 385  |
| LmjF36.2900 | <i>L. major</i> | 86  | 481  | 566  |
| LmjF36.2900 | <i>L. major</i> | 69  | 599  | 667  |
| LmjF36.2900 | <i>L. major</i> | 112 | 801  | 912  |
| LmjF36.2910 | <i>L. major</i> | 56  | 20   | 75   |
| LmjF36.2910 | <i>L. major</i> | 49  | 298  | 346  |
| LmjF36.2930 | <i>L. major</i> | 205 | 346  | 550  |
| LmjF36.2940 | <i>L. major</i> | 46  | 366  | 411  |
| LmjF36.2940 | <i>L. major</i> | 58  | 539  | 596  |
| LmjF36.2940 | <i>L. major</i> | 40  | 2233 | 2272 |
| LmjF36.2940 | <i>L. major</i> | 138 | 2605 | 2742 |
| LmjF36.2940 | <i>L. major</i> | 94  | 3698 | 3791 |
| LmjF36.2980 | <i>L. major</i> | 121 | 113  | 233  |
| LmjF36.2990 | <i>L. major</i> | 43  | 363  | 405  |
| LmjF36.3000 | <i>L. major</i> | 47  | 250  | 296  |
| LmjF36.3000 | <i>L. major</i> | 64  | 705  | 768  |
| LmjF36.3000 | <i>L. major</i> | 64  | 705  | 768  |
| LmjF36.3040 | <i>L. major</i> | 46  | 138  | 183  |
| LmjF36.3090 | <i>L. major</i> | 294 | 238  | 531  |
| LmjF36.3090 | <i>L. major</i> | 45  | 779  | 823  |
| LmjF36.3100 | <i>L. major</i> | 99  | 1    | 99   |
| LmjF36.3140 | <i>L. major</i> | 42  | 20   | 61   |
| LmjF36.3150 | <i>L. major</i> | 294 | 125  | 418  |
| LmjF36.3160 | <i>L. major</i> | 60  | 1    | 60   |
| LmjF36.3160 | <i>L. major</i> | 65  | 94   | 158  |
| LmjF36.3160 | <i>L. major</i> | 65  | 94   | 158  |
| LmjF36.3180 | <i>L. major</i> | 48  | 79   | 126  |
| LmjF36.3180 | <i>L. major</i> | 43  | 278  | 320  |
| LmjF36.3180 | <i>L. major</i> | 81  | 1182 | 1262 |
| LmjF36.3190 | <i>L. major</i> | 98  | 1    | 98   |
| LmjF36.3190 | <i>L. major</i> | 68  | 140  | 207  |

|             |                 |     |      |      |
|-------------|-----------------|-----|------|------|
| LmjF36.3190 | <i>L. major</i> | 84  | 246  | 329  |
| LmjF36.3200 | <i>L. major</i> | 85  | 846  | 930  |
| LmjF36.3220 | <i>L. major</i> | 353 | 31   | 383  |
| LmjF36.3220 | <i>L. major</i> | 85  | 409  | 493  |
| LmjF36.3250 | <i>L. major</i> | 53  | 132  | 184  |
| LmjF36.3260 | <i>L. major</i> | 79  | 95   | 173  |
| LmjF36.3280 | <i>L. major</i> | 46  | 1    | 46   |
| LmjF36.3280 | <i>L. major</i> | 42  | 134  | 175  |
| LmjF36.3280 | <i>L. major</i> | 47  | 206  | 252  |
| LmjF36.3280 | <i>L. major</i> | 65  | 1106 | 1170 |
| LmjF36.3300 | <i>L. major</i> | 287 | 22   | 308  |
| LmjF36.3300 | <i>L. major</i> | 64  | 343  | 406  |
| LmjF36.3300 | <i>L. major</i> | 290 | 458  | 747  |
| LmjF36.3330 | <i>L. major</i> | 146 | 187  | 332  |
| LmjF36.3340 | <i>L. major</i> | 61  | 320  | 380  |
| LmjF36.3340 | <i>L. major</i> | 77  | 1482 | 1558 |
| LmjF36.3340 | <i>L. major</i> | 40  | 1763 | 1802 |
| LmjF36.3350 | <i>L. major</i> | 47  | 45   | 91   |
| LmjF36.3410 | <i>L. major</i> | 70  | 1    | 70   |
| LmjF36.3430 | <i>L. major</i> | 77  | 294  | 370  |
| LmjF36.3430 | <i>L. major</i> | 79  | 389  | 467  |
| LmjF36.3430 | <i>L. major</i> | 97  | 632  | 728  |
| LmjF36.3440 | <i>L. major</i> | 216 | 1    | 216  |
| LmjF36.3480 | <i>L. major</i> | 155 | 54   | 208  |
| LmjF36.3490 | <i>L. major</i> | 117 | 223  | 339  |
| LmjF36.3500 | <i>L. major</i> | 391 | 1    | 391  |
| LmjF36.3510 | <i>L. major</i> | 42  | 145  | 186  |
| LmjF36.3520 | <i>L. major</i> | 66  | 1    | 66   |
| LmjF36.3540 | <i>L. major</i> | 57  | 43   | 99   |
| LmjF36.3540 | <i>L. major</i> | 44  | 191  | 234  |
| LmjF36.3540 | <i>L. major</i> | 40  | 332  | 371  |
| LmjF36.3550 | <i>L. major</i> | 291 | 266  | 556  |
| LmjF36.3550 | <i>L. major</i> | 435 | 580  | 1014 |
| LmjF36.3550 | <i>L. major</i> | 50  | 1038 | 1087 |
| LmjF36.3570 | <i>L. major</i> | 166 | 103  | 268  |
| LmjF36.3600 | <i>L. major</i> | 41  | 73   | 113  |
| LmjF36.3600 | <i>L. major</i> | 119 | 126  | 244  |
| LmjF36.3600 | <i>L. major</i> | 112 | 380  | 491  |
| LmjF36.3630 | <i>L. major</i> | 75  | 127  | 201  |
| LmjF36.3630 | <i>L. major</i> | 52  | 239  | 290  |
| LmjF36.3630 | <i>L. major</i> | 52  | 239  | 290  |
| LmjF36.3670 | <i>L. major</i> | 55  | 59   | 113  |
| LmjF36.3670 | <i>L. major</i> | 87  | 254  | 340  |
| LmjF36.3680 | <i>L. major</i> | 51  | 640  | 690  |
| LmjF36.3690 | <i>L. major</i> | 42  | 1    | 42   |
| LmjF36.3720 | <i>L. major</i> | 49  | 26   | 74   |
| LmjF36.3720 | <i>L. major</i> | 131 | 125  | 255  |

|             |                 |     |      |      |
|-------------|-----------------|-----|------|------|
| LmjF36.3720 | <i>L. major</i> | 41  | 546  | 586  |
| LmjF36.3740 | <i>L. major</i> | 51  | 1    | 51   |
| LmjF36.3740 | <i>L. major</i> | 71  | 98   | 168  |
| LmjF36.3770 | <i>L. major</i> | 41  | 1    | 41   |
| LmjF36.3790 | <i>L. major</i> | 220 | 142  | 361  |
| LmjF36.3790 | <i>L. major</i> | 62  | 490  | 551  |
| LmjF36.3790 | <i>L. major</i> | 61  | 574  | 634  |
| LmjF36.3790 | <i>L. major</i> | 272 | 672  | 943  |
| LmjF36.3820 | <i>L. major</i> | 106 | 1    | 106  |
| LmjF36.3830 | <i>L. major</i> | 41  | 1    | 41   |
| LmjF36.3830 | <i>L. major</i> | 77  | 186  | 262  |
| LmjF36.3830 | <i>L. major</i> | 77  | 186  | 262  |
| LmjF36.3850 | <i>L. major</i> | 225 | 1    | 225  |
| LmjF36.3870 | <i>L. major</i> | 77  | 56   | 132  |
| LmjF36.3870 | <i>L. major</i> | 40  | 171  | 210  |
| LmjF36.3870 | <i>L. major</i> | 48  | 276  | 323  |
| LmjF36.3870 | <i>L. major</i> | 96  | 414  | 509  |
| LmjF36.3870 | <i>L. major</i> | 131 | 552  | 682  |
| LmjF36.3870 | <i>L. major</i> | 76  | 691  | 766  |
| LmjF36.3870 | <i>L. major</i> | 44  | 782  | 825  |
| LmjF36.3890 | <i>L. major</i> | 120 | 90   | 209  |
| LmjF36.3900 | <i>L. major</i> | 100 | 131  | 230  |
| LmjF36.3930 | <i>L. major</i> | 101 | 59   | 159  |
| LmjF36.3930 | <i>L. major</i> | 129 | 228  | 356  |
| LmjF36.3930 | <i>L. major</i> | 60  | 654  | 713  |
| LmjF36.3930 | <i>L. major</i> | 168 | 751  | 918  |
| LmjF36.3930 | <i>L. major</i> | 120 | 1332 | 1451 |
| LmjF36.3940 | <i>L. major</i> | 130 | 1    | 130  |
| LmjF36.3940 | <i>L. major</i> | 234 | 236  | 469  |
| LmjF36.3940 | <i>L. major</i> | 221 | 505  | 725  |
| LmjF36.3940 | <i>L. major</i> | 101 | 754  | 854  |
| LmjF36.3940 | <i>L. major</i> | 123 | 887  | 1009 |
| LmjF36.3950 | <i>L. major</i> | 41  | 56   | 96   |
| LmjF36.3960 | <i>L. major</i> | 193 | 1    | 193  |
| LmjF36.3960 | <i>L. major</i> | 321 | 297  | 617  |
| LmjF36.3960 | <i>L. major</i> | 178 | 654  | 831  |
| LmjF36.3960 | <i>L. major</i> | 116 | 902  | 1017 |
| LmjF36.3970 | <i>L. major</i> | 127 | 24   | 150  |
| LmjF36.3970 | <i>L. major</i> | 63  | 255  | 317  |
| LmjF36.3970 | <i>L. major</i> | 41  | 592  | 632  |
| LmjF36.3970 | <i>L. major</i> | 257 | 761  | 1017 |
| LmjF36.3970 | <i>L. major</i> | 244 | 1111 | 1354 |
| LmjF36.3980 | <i>L. major</i> | 69  | 100  | 168  |
| LmjF36.4010 | <i>L. major</i> | 83  | 172  | 254  |
| LmjF36.4010 | <i>L. major</i> | 113 | 317  | 429  |
| LmjF36.4010 | <i>L. major</i> | 113 | 317  | 429  |
| LmjF36.4020 | <i>L. major</i> | 150 | 39   | 188  |



|             |                 |     |      |      |
|-------------|-----------------|-----|------|------|
| LmjF36.4030 | <i>L. major</i> | 310 | 23   | 332  |
| LmjF36.4030 | <i>L. major</i> | 95  | 376  | 470  |
| LmjF36.4030 | <i>L. major</i> | 67  | 790  | 856  |
| LmjF36.4030 | <i>L. major</i> | 118 | 1079 | 1196 |
| LmjF36.4040 | <i>L. major</i> | 93  | 1    | 93   |
| LmjF36.4040 | <i>L. major</i> | 120 | 311  | 430  |
| LmjF36.4050 | <i>L. major</i> | 53  | 111  | 163  |
| LmjF36.4050 | <i>L. major</i> | 50  | 245  | 294  |
| LmjF36.4050 | <i>L. major</i> | 50  | 245  | 294  |
| LmjF36.4060 | <i>L. major</i> | 73  | 1    | 73   |
| LmjF36.4060 | <i>L. major</i> | 79  | 576  | 654  |
| LmjF36.4070 | <i>L. major</i> | 41  | 141  | 181  |
| LmjF36.4080 | <i>L. major</i> | 266 | 200  | 465  |
| LmjF36.4090 | <i>L. major</i> | 84  | 1    | 84   |
| LmjF36.4090 | <i>L. major</i> | 245 | 173  | 417  |
| LmjF36.4100 | <i>L. major</i> | 133 | 261  | 393  |
| LmjF36.4100 | <i>L. major</i> | 143 | 1198 | 1340 |
| LmjF36.4100 | <i>L. major</i> | 57  | 1364 | 1420 |
| LmjF36.4110 | <i>L. major</i> | 69  | 1    | 69   |
| LmjF36.4110 | <i>L. major</i> | 55  | 76   | 130  |
| LmjF36.4110 | <i>L. major</i> | 102 | 305  | 406  |
| LmjF36.4110 | <i>L. major</i> | 73  | 837  | 909  |
| LmjF36.4120 | <i>L. major</i> | 44  | 1    | 44   |
| LmjF36.4150 | <i>L. major</i> | 45  | 81   | 125  |
| LmjF36.4150 | <i>L. major</i> | 105 | 271  | 375  |
| LmjF36.4150 | <i>L. major</i> | 86  | 393  | 478  |
| LmjF36.4150 | <i>L. major</i> | 105 | 511  | 615  |
| LmjF36.4160 | <i>L. major</i> | 329 | 1    | 329  |
| LmjF36.4190 | <i>L. major</i> | 124 | 220  | 343  |
| LmjF36.4200 | <i>L. major</i> | 238 | 275  | 512  |
| LmjF36.4200 | <i>L. major</i> | 64  | 681  | 744  |
| LmjF36.4210 | <i>L. major</i> | 63  | 694  | 756  |
| LmjF36.4210 | <i>L. major</i> | 59  | 786  | 844  |
| LmjF36.4210 | <i>L. major</i> | 59  | 786  | 844  |
| LmjF36.4220 | <i>L. major</i> | 109 | 19   | 127  |
| LmjF36.4220 | <i>L. major</i> | 250 | 228  | 477  |
| LmjF36.4220 | <i>L. major</i> | 126 | 485  | 610  |
| LmjF36.4240 | <i>L. major</i> | 88  | 124  | 211  |
| LmjF36.4240 | <i>L. major</i> | 102 | 300  | 401  |
| LmjF36.4250 | <i>L. major</i> | 62  | 145  | 206  |
| LmjF36.4250 | <i>L. major</i> | 80  | 218  | 297  |
| LmjF36.4250 | <i>L. major</i> | 144 | 515  | 658  |
| LmjF36.4250 | <i>L. major</i> | 79  | 686  | 764  |
| LmjF36.4260 | <i>L. major</i> | 149 | 1    | 149  |
| LmjF36.4260 | <i>L. major</i> | 167 | 176  | 342  |
| LmjF36.4270 | <i>L. major</i> | 71  | 180  | 250  |
| LmjF36.4270 | <i>L. major</i> | 92  | 1142 | 1233 |

|             |                 |     |      |      |
|-------------|-----------------|-----|------|------|
| LmjF36.4270 | <i>L. major</i> | 50  | 1414 | 1463 |
| LmjF36.4280 | <i>L. major</i> | 65  | 358  | 422  |
| LmjF36.4280 | <i>L. major</i> | 42  | 493  | 534  |
| LmjF36.4280 | <i>L. major</i> | 42  | 493  | 534  |
| LmjF36.4290 | <i>L. major</i> | 81  | 346  | 426  |
| LmjF36.4290 | <i>L. major</i> | 138 | 839  | 976  |
| LmjF36.4290 | <i>L. major</i> | 66  | 1165 | 1230 |
| LmjF36.4320 | <i>L. major</i> | 41  | 95   | 135  |
| LmjF36.4320 | <i>L. major</i> | 52  | 166  | 217  |
| LmjF36.4320 | <i>L. major</i> | 149 | 269  | 417  |
| LmjF36.4320 | <i>L. major</i> | 41  | 1019 | 1059 |
| LmjF36.4320 | <i>L. major</i> | 67  | 1676 | 1742 |
| LmjF36.4320 | <i>L. major</i> | 46  | 2148 | 2193 |
| LmjF36.4330 | <i>L. major</i> | 241 | 1    | 241  |
| LmjF36.4330 | <i>L. major</i> | 43  | 786  | 828  |
| LmjF36.4330 | <i>L. major</i> | 59  | 936  | 994  |
| LmjF36.4330 | <i>L. major</i> | 40  | 1019 | 1058 |
| LmjF36.4330 | <i>L. major</i> | 128 | 1239 | 1366 |
| LmjF36.4330 | <i>L. major</i> | 80  | 1546 | 1625 |
| LmjF36.4340 | <i>L. major</i> | 521 | 1    | 521  |
| LmjF36.4350 | <i>L. major</i> | 61  | 1    | 61   |
| LmjF36.4350 | <i>L. major</i> | 242 | 63   | 304  |
| LmjF36.4350 | <i>L. major</i> | 109 | 389  | 497  |
| LmjF36.4350 | <i>L. major</i> | 85  | 622  | 706  |
| LmjF36.4350 | <i>L. major</i> | 168 | 722  | 889  |
| LmjF36.4360 | <i>L. major</i> | 48  | 34   | 81   |
| LmjF36.4370 | <i>L. major</i> | 62  | 437  | 498  |
| LmjF36.4370 | <i>L. major</i> | 225 | 654  | 878  |
| LmjF36.4370 | <i>L. major</i> | 41  | 967  | 1007 |
| LmjF36.4370 | <i>L. major</i> | 187 | 1098 | 1284 |
| LmjF36.4370 | <i>L. major</i> | 87  | 1387 | 1473 |
| LmjF36.4370 | <i>L. major</i> | 84  | 1746 | 1829 |
| LmjF36.4370 | <i>L. major</i> | 54  | 2179 | 2232 |
| LmjF36.4380 | <i>L. major</i> | 79  | 1    | 79   |
| LmjF36.4380 | <i>L. major</i> | 75  | 169  | 243  |
| LmjF36.4380 | <i>L. major</i> | 69  | 375  | 443  |
| LmjF36.4390 | <i>L. major</i> | 70  | 56   | 125  |
| LmjF36.4390 | <i>L. major</i> | 60  | 360  | 419  |
| LmjF36.4390 | <i>L. major</i> | 45  | 603  | 647  |
| LmjF36.4400 | <i>L. major</i> | 183 | 1    | 183  |
| LmjF36.4400 | <i>L. major</i> | 51  | 217  | 267  |
| LmjF36.4400 | <i>L. major</i> | 40  | 292  | 331  |
| LmjF36.4400 | <i>L. major</i> | 163 | 451  | 613  |
| LmjF36.4400 | <i>L. major</i> | 52  | 913  | 964  |
| LmjF36.4410 | <i>L. major</i> | 133 | 62   | 194  |
| LmjF36.4460 | <i>L. major</i> | 44  | 117  | 160  |
| LmjF36.4470 | <i>L. major</i> | 42  | 58   | 99   |

|             |                 |     |      |      |
|-------------|-----------------|-----|------|------|
| LmjF36.4470 | <i>L. major</i> | 113 | 163  | 275  |
| LmjF36.4480 | <i>L. major</i> | 120 | 130  | 249  |
| LmjF36.4480 | <i>L. major</i> | 88  | 562  | 649  |
| LmjF36.4490 | <i>L. major</i> | 94  | 1    | 94   |
| LmjF36.4490 | <i>L. major</i> | 40  | 121  | 160  |
| LmjF36.4490 | <i>L. major</i> | 45  | 343  | 387  |
| LmjF36.4510 | <i>L. major</i> | 51  | 148  | 198  |
| LmjF36.4520 | <i>L. major</i> | 41  | 390  | 430  |
| LmjF36.4520 | <i>L. major</i> | 40  | 432  | 471  |
| LmjF36.4520 | <i>L. major</i> | 78  | 554  | 631  |
| LmjF36.4530 | <i>L. major</i> | 99  | 1    | 99   |
| LmjF36.4540 | <i>L. major</i> | 45  | 1    | 45   |
| LmjF36.4540 | <i>L. major</i> | 60  | 310  | 369  |
| LmjF36.4550 | <i>L. major</i> | 74  | 1    | 74   |
| LmjF36.4550 | <i>L. major</i> | 111 | 734  | 844  |
| LmjF36.4550 | <i>L. major</i> | 111 | 734  | 844  |
| LmjF36.4560 | <i>L. major</i> | 263 | 87   | 349  |
| LmjF36.4560 | <i>L. major</i> | 42  | 452  | 493  |
| LmjF36.4570 | <i>L. major</i> | 91  | 1    | 91   |
| LmjF36.4580 | <i>L. major</i> | 80  | 36   | 115  |
| LmjF36.4580 | <i>L. major</i> | 50  | 213  | 262  |
| LmjF36.4580 | <i>L. major</i> | 47  | 319  | 365  |
| LmjF36.4590 | <i>L. major</i> | 78  | 51   | 128  |
| LmjF36.4590 | <i>L. major</i> | 146 | 199  | 344  |
| LmjF36.4590 | <i>L. major</i> | 58  | 531  | 588  |
| LmjF36.4590 | <i>L. major</i> | 61  | 636  | 696  |
| LmjF36.4610 | <i>L. major</i> | 159 | 1    | 159  |
| LmjF36.4610 | <i>L. major</i> | 74  | 222  | 295  |
| LmjF36.4610 | <i>L. major</i> | 86  | 330  | 415  |
| LmjF36.4620 | <i>L. major</i> | 113 | 17   | 129  |
| LmjF36.4620 | <i>L. major</i> | 63  | 401  | 463  |
| LmjF36.4620 | <i>L. major</i> | 58  | 720  | 777  |
| LmjF36.4620 | <i>L. major</i> | 41  | 1200 | 1240 |
| LmjF36.4640 | <i>L. major</i> | 135 | 416  | 550  |
| LmjF36.4660 | <i>L. major</i> | 51  | 66   | 116  |
| LmjF36.4660 | <i>L. major</i> | 96  | 287  | 382  |
| LmjF36.4660 | <i>L. major</i> | 99  | 691  | 789  |
| LmjF36.4660 | <i>L. major</i> | 89  | 808  | 896  |
| LmjF36.4670 | <i>L. major</i> | 128 | 1    | 128  |
| LmjF36.4680 | <i>L. major</i> | 51  | 1    | 51   |
| LmjF36.4680 | <i>L. major</i> | 67  | 173  | 239  |
| LmjF36.4680 | <i>L. major</i> | 49  | 633  | 681  |
| LmjF36.4680 | <i>L. major</i> | 79  | 698  | 776  |
| LmjF36.4680 | <i>L. major</i> | 588 | 786  | 1373 |
| LmjF36.4680 | <i>L. major</i> | 430 | 1385 | 1814 |
| LmjF36.4690 | <i>L. major</i> | 70  | 59   | 128  |
| LmjF36.4690 | <i>L. major</i> | 121 | 271  | 391  |

|             |                 |     |      |      |
|-------------|-----------------|-----|------|------|
| LmjF36.4690 | <i>L. major</i> | 88  | 534  | 621  |
| LmjF36.4690 | <i>L. major</i> | 48  | 757  | 804  |
| LmjF36.4690 | <i>L. major</i> | 51  | 838  | 888  |
| LmjF36.4710 | <i>L. major</i> | 48  | 143  | 190  |
| LmjF36.4710 | <i>L. major</i> | 284 | 444  | 727  |
| LmjF36.4720 | <i>L. major</i> | 59  | 408  | 466  |
| LmjF36.4720 | <i>L. major</i> | 97  | 664  | 760  |
| LmjF36.4720 | <i>L. major</i> | 85  | 924  | 1008 |
| LmjF36.4730 | <i>L. major</i> | 63  | 165  | 227  |
| LmjF36.4730 | <i>L. major</i> | 54  | 443  | 496  |
| LmjF36.4730 | <i>L. major</i> | 565 | 913  | 1477 |
| LmjF36.4740 | <i>L. major</i> | 63  | 108  | 170  |
| LmjF36.4740 | <i>L. major</i> | 188 | 481  | 668  |
| LmjF36.4740 | <i>L. major</i> | 140 | 777  | 916  |
| LmjF36.4740 | <i>L. major</i> | 250 | 935  | 1184 |
| LmjF36.4740 | <i>L. major</i> | 125 | 1282 | 1406 |
| LmjF36.4760 | <i>L. major</i> | 144 | 99   | 242  |
| LmjF36.4790 | <i>L. major</i> | 162 | 1    | 162  |
| LmjF36.4790 | <i>L. major</i> | 102 | 197  | 298  |
| LmjF36.4790 | <i>L. major</i> | 48  | 329  | 376  |
| LmjF36.4790 | <i>L. major</i> | 78  | 400  | 477  |
| LmjF36.4790 | <i>L. major</i> | 142 | 485  | 626  |
| LmjF36.4790 | <i>L. major</i> | 128 | 687  | 814  |
| LmjF36.4790 | <i>L. major</i> | 82  | 837  | 918  |
| LmjF36.4800 | <i>L. major</i> | 45  | 98   | 142  |
| LmjF36.4800 | <i>L. major</i> | 65  | 226  | 290  |
| LmjF36.4820 | <i>L. major</i> | 171 | 1    | 171  |
| LmjF36.4840 | <i>L. major</i> | 46  | 1    | 46   |
| LmjF36.4840 | <i>L. major</i> | 65  | 775  | 839  |
| LmjF36.4840 | <i>L. major</i> | 91  | 893  | 983  |
| LmjF36.4850 | <i>L. major</i> | 96  | 22   | 117  |
| LmjF36.4850 | <i>L. major</i> | 130 | 219  | 348  |
| LmjF36.4850 | <i>L. major</i> | 57  | 419  | 475  |
| LmjF36.4850 | <i>L. major</i> | 123 | 487  | 609  |
| LmjF36.4890 | <i>L. major</i> | 74  | 1    | 74   |
| LmjF36.4890 | <i>L. major</i> | 57  | 276  | 332  |
| LmjF36.4890 | <i>L. major</i> | 57  | 276  | 332  |
| LmjF36.4900 | <i>L. major</i> | 100 | 1    | 100  |
| LmjF36.4900 | <i>L. major</i> | 154 | 122  | 275  |
| LmjF36.4900 | <i>L. major</i> | 74  | 1334 | 1407 |
| LmjF36.4900 | <i>L. major</i> | 76  | 1575 | 1650 |
| LmjF36.4900 | <i>L. major</i> | 41  | 1658 | 1698 |
| LmjF36.4900 | <i>L. major</i> | 62  | 1722 | 1783 |
| LmjF36.4900 | <i>L. major</i> | 86  | 1950 | 2035 |
| LmjF36.4900 | <i>L. major</i> | 53  | 2043 | 2095 |
| LmjF36.4910 | <i>L. major</i> | 360 | 1    | 360  |
| LmjF36.4920 | <i>L. major</i> | 131 | 62   | 192  |

|             |                 |     |      |      |
|-------------|-----------------|-----|------|------|
| LmjF36.4920 | <i>L. major</i> | 238 | 342  | 579  |
| LmjF36.4930 | <i>L. major</i> | 99  | 46   | 144  |
| LmjF36.4940 | <i>L. major</i> | 45  | 97   | 141  |
| LmjF36.4950 | <i>L. major</i> | 79  | 1    | 79   |
| LmjF36.4950 | <i>L. major</i> | 106 | 200  | 305  |
| LmjF36.4950 | <i>L. major</i> | 61  | 578  | 638  |
| LmjF36.4960 | <i>L. major</i> | 167 | 246  | 412  |
| LmjF36.4960 | <i>L. major</i> | 43  | 870  | 912  |
| LmjF36.4970 | <i>L. major</i> | 77  | 89   | 165  |
| LmjF36.4970 | <i>L. major</i> | 132 | 214  | 345  |
| LmjF36.4980 | <i>L. major</i> | 103 | 55   | 157  |
| LmjF36.4990 | <i>L. major</i> | 71  | 27   | 97   |
| LmjF36.4990 | <i>L. major</i> | 60  | 108  | 167  |
| LmjF36.4990 | <i>L. major</i> | 60  | 108  | 167  |
| LmjF36.5000 | <i>L. major</i> | 63  | 294  | 356  |
| LmjF36.5020 | <i>L. major</i> | 40  | 1    | 40   |
| LmjF36.5020 | <i>L. major</i> | 233 | 67   | 299  |
| LmjF36.5020 | <i>L. major</i> | 305 | 319  | 623  |
| LmjF36.5020 | <i>L. major</i> | 144 | 668  | 811  |
| LmjF36.5030 | <i>L. major</i> | 102 | 1    | 102  |
| LmjF36.5030 | <i>L. major</i> | 46  | 125  | 170  |
| LmjF36.5030 | <i>L. major</i> | 118 | 212  | 329  |
| LmjF36.5060 | <i>L. major</i> | 99  | 155  | 253  |
| LmjF36.5080 | <i>L. major</i> | 130 | 1    | 130  |
| LmjF36.5080 | <i>L. major</i> | 55  | 228  | 282  |
| LmjF36.5080 | <i>L. major</i> | 72  | 350  | 421  |
| LmjF36.5090 | <i>L. major</i> | 63  | 212  | 274  |
| LmjF36.5100 | <i>L. major</i> | 257 | 1    | 257  |
| LmjF36.5100 | <i>L. major</i> | 93  | 413  | 505  |
| LmjF36.5100 | <i>L. major</i> | 73  | 616  | 688  |
| LmjF36.5140 | <i>L. major</i> | 52  | 164  | 215  |
| LmjF36.5140 | <i>L. major</i> | 230 | 289  | 518  |
| LmjF36.5150 | <i>L. major</i> | 263 | 363  | 625  |
| LmjF36.5160 | <i>L. major</i> | 42  | 199  | 240  |
| LmjF36.5160 | <i>L. major</i> | 75  | 291  | 365  |
| LmjF36.5190 | <i>L. major</i> | 146 | 1    | 146  |
| LmjF36.5190 | <i>L. major</i> | 71  | 153  | 223  |
| LmjF36.5190 | <i>L. major</i> | 92  | 1054 | 1145 |
| LmjF36.5200 | <i>L. major</i> | 45  | 355  | 399  |
| LmjF36.5200 | <i>L. major</i> | 58  | 565  | 622  |
| LmjF36.5200 | <i>L. major</i> | 58  | 565  | 622  |
| LmjF36.5210 | <i>L. major</i> | 76  | 1    | 76   |
| LmjF36.5210 | <i>L. major</i> | 53  | 1212 | 1264 |
| LmjF36.5210 | <i>L. major</i> | 53  | 1212 | 1264 |
| LmjF36.5230 | <i>L. major</i> | 62  | 1    | 62   |
| LmjF36.5240 | <i>L. major</i> | 105 | 58   | 162  |
| LmjF36.5240 | <i>L. major</i> | 71  | 299  | 369  |

|             |                 |     |      |      |
|-------------|-----------------|-----|------|------|
| LmjF36.5250 | <i>L. major</i> | 43  | 163  | 205  |
| LmjF36.5250 | <i>L. major</i> | 57  | 263  | 319  |
| LmjF36.5250 | <i>L. major</i> | 57  | 360  | 416  |
| LmjF36.5250 | <i>L. major</i> | 67  | 454  | 520  |
| LmjF36.5250 | <i>L. major</i> | 55  | 682  | 736  |
| LmjF36.5250 | <i>L. major</i> | 713 | 908  | 1620 |
| LmjF36.5250 | <i>L. major</i> | 76  | 2000 | 2075 |
| LmjF36.5250 | <i>L. major</i> | 152 | 2138 | 2289 |
| LmjF36.5250 | <i>L. major</i> | 77  | 2346 | 2422 |
| LmjF36.5250 | <i>L. major</i> | 66  | 2548 | 2613 |
| LmjF36.5250 | <i>L. major</i> | 53  | 2627 | 2679 |
| LmjF36.5250 | <i>L. major</i> | 78  | 2895 | 2972 |
| LmjF36.5250 | <i>L. major</i> | 67  | 3005 | 3071 |
| LmjF36.5250 | <i>L. major</i> | 47  | 3516 | 3562 |
| LmjF36.5260 | <i>L. major</i> | 61  | 266  | 326  |
| LmjF36.5260 | <i>L. major</i> | 164 | 686  | 849  |
| LmjF36.5270 | <i>L. major</i> | 57  | 51   | 107  |
| LmjF36.5270 | <i>L. major</i> | 52  | 518  | 569  |
| LmjF36.5270 | <i>L. major</i> | 72  | 652  | 723  |
| LmjF36.5280 | <i>L. major</i> | 81  | 1    | 81   |
| LmjF36.5280 | <i>L. major</i> | 48  | 111  | 158  |
| LmjF36.5280 | <i>L. major</i> | 62  | 311  | 372  |
| LmjF36.5280 | <i>L. major</i> | 51  | 603  | 653  |
| LmjF36.5280 | <i>L. major</i> | 66  | 674  | 739  |
| LmjF36.5280 | <i>L. major</i> | 44  | 905  | 948  |
| LmjF36.5290 | <i>L. major</i> | 95  | 1    | 95   |
| LmjF36.5290 | <i>L. major</i> | 51  | 108  | 158  |
| LmjF36.5300 | <i>L. major</i> | 52  | 1    | 52   |
| LmjF36.5300 | <i>L. major</i> | 52  | 89   | 140  |
| LmjF36.5300 | <i>L. major</i> | 47  | 155  | 201  |
| LmjF36.5300 | <i>L. major</i> | 206 | 508  | 713  |
| LmjF36.5310 | <i>L. major</i> | 48  | 1    | 48   |
| LmjF36.5310 | <i>L. major</i> | 65  | 93   | 157  |
| LmjF36.5310 | <i>L. major</i> | 55  | 317  | 371  |
| LmjF36.5320 | <i>L. major</i> | 109 | 427  | 535  |
| LmjF36.5330 | <i>L. major</i> | 153 | 146  | 298  |
| LmjF36.5330 | <i>L. major</i> | 43  | 888  | 930  |
| LmjF36.5330 | <i>L. major</i> | 79  | 960  | 1038 |
| LmjF36.5340 | <i>L. major</i> | 656 | 1    | 656  |
| LmjF36.5340 | <i>L. major</i> | 62  | 781  | 842  |
| LmjF36.5350 | <i>L. major</i> | 40  | 1    | 40   |
| LmjF36.5350 | <i>L. major</i> | 81  | 329  | 409  |
| LmjF36.5350 | <i>L. major</i> | 66  | 444  | 509  |
| LmjF36.5350 | <i>L. major</i> | 381 | 618  | 998  |
| LmjF36.5365 | <i>L. major</i> | 64  | 443  | 506  |
| LmjF36.5370 | <i>L. major</i> | 183 | 311  | 493  |
| LmjF36.5380 | <i>L. major</i> | 77  | 451  | 527  |

|             |                 |     |      |      |
|-------------|-----------------|-----|------|------|
| LmjF36.5400 | <i>L. major</i> | 95  | 238  | 332  |
| LmjF36.5400 | <i>L. major</i> | 72  | 366  | 437  |
| LmjF36.5400 | <i>L. major</i> | 72  | 366  | 437  |
| LmjF36.5420 | <i>L. major</i> | 104 | 186  | 289  |
| LmjF36.5430 | <i>L. major</i> | 67  | 178  | 244  |
| LmjF36.5440 | <i>L. major</i> | 108 | 1    | 108  |
| LmjF36.5440 | <i>L. major</i> | 175 | 110  | 284  |
| LmjF36.5440 | <i>L. major</i> | 53  | 381  | 433  |
| LmjF36.5440 | <i>L. major</i> | 47  | 478  | 524  |
| LmjF36.5450 | <i>L. major</i> | 45  | 132  | 176  |
| LmjF36.5460 | <i>L. major</i> | 48  | 458  | 505  |
| LmjF36.5470 | <i>L. major</i> | 63  | 1    | 63   |
| LmjF36.5470 | <i>L. major</i> | 74  | 95   | 168  |
| LmjF36.5470 | <i>L. major</i> | 79  | 179  | 257  |
| LmjF36.5470 | <i>L. major</i> | 111 | 342  | 452  |
| LmjF36.5470 | <i>L. major</i> | 83  | 822  | 904  |
| LmjF36.5480 | <i>L. major</i> | 146 | 21   | 166  |
| LmjF36.5480 | <i>L. major</i> | 233 | 410  | 642  |
| LmjF36.5490 | <i>L. major</i> | 170 | 1    | 170  |
| LmjF36.5500 | <i>L. major</i> | 48  | 1    | 48   |
| LmjF36.5510 | <i>L. major</i> | 198 | 1    | 198  |
| LmjF36.5530 | <i>L. major</i> | 50  | 23   | 72   |
| LmjF36.5540 | <i>L. major</i> | 51  | 296  | 346  |
| LmjF36.5550 | <i>L. major</i> | 44  | 596  | 639  |
| LmjF36.5550 | <i>L. major</i> | 59  | 1243 | 1301 |
| LmjF36.5550 | <i>L. major</i> | 59  | 1243 | 1301 |
| LmjF36.5560 | <i>L. major</i> | 50  | 326  | 375  |
| LmjF36.5580 | <i>L. major</i> | 44  | 110  | 153  |
| LmjF36.5580 | <i>L. major</i> | 67  | 306  | 372  |
| LmjF36.5580 | <i>L. major</i> | 67  | 306  | 372  |
| LmjF36.5590 | <i>L. major</i> | 43  | 1    | 43   |
| LmjF36.5590 | <i>L. major</i> | 70  | 45   | 114  |
| LmjF36.5600 | <i>L. major</i> | 169 | 25   | 193  |
| LmjF36.5600 | <i>L. major</i> | 42  | 244  | 285  |
| LmjF36.5600 | <i>L. major</i> | 63  | 347  | 409  |
| LmjF36.5630 | <i>L. major</i> | 64  | 96   | 159  |
| LmjF36.5640 | <i>L. major</i> | 117 | 378  | 494  |
| LmjF36.5650 | <i>L. major</i> | 59  | 217  | 275  |
| LmjF36.5650 | <i>L. major</i> | 53  | 277  | 329  |
| LmjF36.5660 | <i>L. major</i> | 111 | 293  | 403  |
| LmjF36.5660 | <i>L. major</i> | 57  | 527  | 583  |
| LmjF36.5660 | <i>L. major</i> | 67  | 651  | 717  |
| LmjF36.5670 | <i>L. major</i> | 45  | 561  | 605  |
| LmjF36.5690 | <i>L. major</i> | 96  | 209  | 304  |
| LmjF36.5700 | <i>L. major</i> | 52  | 410  | 461  |
| LmjF36.5700 | <i>L. major</i> | 149 | 641  | 789  |
| LmjF36.5730 | <i>L. major</i> | 50  | 117  | 166  |

|             |                 |     |      |      |
|-------------|-----------------|-----|------|------|
| LmjF36.5730 | <i>L. major</i> | 68  | 332  | 399  |
| LmjF36.5740 | <i>L. major</i> | 380 | 54   | 433  |
| LmjF36.5740 | <i>L. major</i> | 89  | 443  | 531  |
| LmjF36.5740 | <i>L. major</i> | 172 | 559  | 730  |
| LmjF36.5750 | <i>L. major</i> | 56  | 77   | 132  |
| LmjF36.5760 | <i>L. major</i> | 40  | 58   | 97   |
| LmjF36.5760 | <i>L. major</i> | 43  | 256  | 298  |
| LmjF36.5760 | <i>L. major</i> | 89  | 357  | 445  |
| LmjF36.5760 | <i>L. major</i> | 49  | 650  | 698  |
| LmjF36.5760 | <i>L. major</i> | 83  | 1059 | 1141 |
| LmjF36.5760 | <i>L. major</i> | 48  | 1454 | 1501 |
| LmjF36.5760 | <i>L. major</i> | 56  | 1640 | 1695 |
| LmjF36.5780 | <i>L. major</i> | 43  | 76   | 118  |
| LmjF36.5780 | <i>L. major</i> | 50  | 255  | 304  |
| LmjF36.5780 | <i>L. major</i> | 47  | 418  | 464  |
| LmjF36.5790 | <i>L. major</i> | 70  | 300  | 369  |
| LmjF36.5800 | <i>L. major</i> | 52  | 294  | 345  |
| LmjF36.5800 | <i>L. major</i> | 85  | 790  | 874  |
| LmjF36.5800 | <i>L. major</i> | 53  | 1094 | 1146 |
| LmjF36.5810 | <i>L. major</i> | 46  | 99   | 144  |
| LmjF36.5810 | <i>L. major</i> | 122 | 194  | 315  |
| LmjF36.5810 | <i>L. major</i> | 44  | 354  | 397  |
| LmjF36.5820 | <i>L. major</i> | 74  | 70   | 143  |
| LmjF36.5820 | <i>L. major</i> | 187 | 151  | 337  |
| LmjF36.5820 | <i>L. major</i> | 65  | 374  | 438  |
| LmjF36.5840 | <i>L. major</i> | 54  | 29   | 82   |
| LmjF36.5840 | <i>L. major</i> | 117 | 88   | 204  |
| LmjF36.5840 | <i>L. major</i> | 129 | 219  | 347  |
| LmjF36.5845 | <i>L. major</i> | 67  | 23   | 89   |
| LmjF36.5850 | <i>L. major</i> | 116 | 38   | 153  |
| LmjF36.5850 | <i>L. major</i> | 43  | 183  | 225  |
| LmjF36.5850 | <i>L. major</i> | 289 | 249  | 537  |
| LmjF36.5860 | <i>L. major</i> | 88  | 396  | 483  |
| LmjF36.5860 | <i>L. major</i> | 44  | 628  | 671  |
| LmjF36.5860 | <i>L. major</i> | 44  | 628  | 671  |
| LmjF36.5870 | <i>L. major</i> | 43  | 220  | 262  |
| LmjF36.5890 | <i>L. major</i> | 59  | 31   | 89   |
| LmjF36.5890 | <i>L. major</i> | 110 | 385  | 494  |
| LmjF36.5890 | <i>L. major</i> | 68  | 529  | 596  |
| LmjF36.5890 | <i>L. major</i> | 66  | 1085 | 1150 |
| LmjF36.5890 | <i>L. major</i> | 54  | 1203 | 1256 |
| LmjF36.5890 | <i>L. major</i> | 52  | 1808 | 1859 |
| LmjF36.5920 | <i>L. major</i> | 62  | 20   | 81   |
| LmjF36.5920 | <i>L. major</i> | 48  | 114  | 161  |
| LmjF36.5930 | <i>L. major</i> | 177 | 1    | 177  |
| LmjF36.5930 | <i>L. major</i> | 92  | 201  | 292  |
| LmjF36.5930 | <i>L. major</i> | 92  | 201  | 292  |



|             |                 |     |      |      |
|-------------|-----------------|-----|------|------|
| LmjF36.5940 | <i>L. major</i> | 86  | 47   | 132  |
| LmjF36.5950 | <i>L. major</i> | 63  | 1    | 63   |
| LmjF36.5950 | <i>L. major</i> | 116 | 83   | 198  |
| LmjF36.5950 | <i>L. major</i> | 116 | 229  | 344  |
| LmjF36.5970 | <i>L. major</i> | 252 | 387  | 638  |
| LmjF36.5980 | <i>L. major</i> | 75  | 1    | 75   |
| LmjF36.5980 | <i>L. major</i> | 68  | 393  | 460  |
| LmjF36.5990 | <i>L. major</i> | 106 | 157  | 262  |
| LmjF36.5990 | <i>L. major</i> | 280 | 378  | 657  |
| LmjF36.6000 | <i>L. major</i> | 173 | 1    | 173  |
| LmjF36.6000 | <i>L. major</i> | 130 | 200  | 329  |
| LmjF36.6000 | <i>L. major</i> | 55  | 353  | 407  |
| LmjF36.6000 | <i>L. major</i> | 81  | 418  | 498  |
| LmjF36.6000 | <i>L. major</i> | 143 | 626  | 768  |
| LmjF36.6000 | <i>L. major</i> | 72  | 781  | 852  |
| LmjF36.6010 | <i>L. major</i> | 232 | 1    | 232  |
| LmjF36.6010 | <i>L. major</i> | 113 | 246  | 358  |
| LmjF36.6010 | <i>L. major</i> | 84  | 415  | 498  |
| LmjF36.6010 | <i>L. major</i> | 50  | 621  | 670  |
| LmjF36.6020 | <i>L. major</i> | 48  | 94   | 141  |
| LmjF36.6030 | <i>L. major</i> | 46  | 318  | 363  |
| LmjF36.6030 | <i>L. major</i> | 108 | 551  | 658  |
| LmjF36.6030 | <i>L. major</i> | 41  | 740  | 780  |
| LmjF36.6030 | <i>L. major</i> | 105 | 900  | 1004 |
| LmjF36.6030 | <i>L. major</i> | 67  | 1045 | 1111 |
| LmjF36.6030 | <i>L. major</i> | 57  | 1140 | 1196 |
| LmjF36.6030 | <i>L. major</i> | 97  | 1321 | 1417 |
| LmjF36.6030 | <i>L. major</i> | 120 | 1478 | 1597 |
| LmjF36.6030 | <i>L. major</i> | 71  | 1698 | 1768 |
| LmjF36.6030 | <i>L. major</i> | 50  | 1926 | 1975 |
| LmjF36.6030 | <i>L. major</i> | 90  | 2257 | 2346 |
| LmjF36.6040 | <i>L. major</i> | 68  | 1    | 68   |
| LmjF36.6040 | <i>L. major</i> | 48  | 90   | 137  |
| LmjF36.6040 | <i>L. major</i> | 54  | 277  | 330  |
| LmjF36.6040 | <i>L. major</i> | 57  | 863  | 919  |
| LmjF36.6060 | <i>L. major</i> | 43  | 52   | 94   |
| LmjF36.6060 | <i>L. major</i> | 45  | 174  | 218  |
| LmjF36.6060 | <i>L. major</i> | 202 | 331  | 532  |
| LmjF36.6070 | <i>L. major</i> | 133 | 56   | 188  |
| LmjF36.6080 | <i>L. major</i> | 87  | 1    | 87   |
| LmjF36.6120 | <i>L. major</i> | 45  | 268  | 312  |
| LmjF36.6130 | <i>L. major</i> | 62  | 1    | 62   |
| LmjF36.6130 | <i>L. major</i> | 101 | 68   | 168  |
| LmjF36.6130 | <i>L. major</i> | 102 | 218  | 319  |
| LmjF36.6140 | <i>L. major</i> | 72  | 119  | 190  |
| LmjF36.6140 | <i>L. major</i> | 533 | 234  | 766  |
| LmjF36.6150 | <i>L. major</i> | 114 | 174  | 287  |

|             |                 |     |      |      |
|-------------|-----------------|-----|------|------|
| LmjF36.6160 | <i>L. major</i> | 204 | 1    | 204  |
| LmjF36.6170 | <i>L. major</i> | 122 | 116  | 237  |
| LmjF36.6200 | <i>L. major</i> | 176 | 1    | 176  |
| LmjF36.6200 | <i>L. major</i> | 142 | 211  | 352  |
| LmjF36.6200 | <i>L. major</i> | 54  | 789  | 842  |
| LmjF36.6210 | <i>L. major</i> | 41  | 978  | 1018 |
| LmjF36.6220 | <i>L. major</i> | 185 | 53   | 237  |
| LmjF36.6220 | <i>L. major</i> | 207 | 269  | 475  |
| LmjF36.6220 | <i>L. major</i> | 378 | 533  | 910  |
| LmjF36.6220 | <i>L. major</i> | 254 | 930  | 1183 |
| LmjF36.6220 | <i>L. major</i> | 43  | 1215 | 1257 |
| LmjF36.6220 | <i>L. major</i> | 195 | 1274 | 1468 |
| LmjF36.6240 | <i>L. major</i> | 49  | 33   | 81   |
| LmjF36.6240 | <i>L. major</i> | 341 | 322  | 662  |
| LmjF36.6240 | <i>L. major</i> | 95  | 665  | 759  |
| LmjF36.6250 | <i>L. major</i> | 130 | 168  | 297  |
| LmjF36.6270 | <i>L. major</i> | 83  | 31   | 113  |
| LmjF36.6270 | <i>L. major</i> | 47  | 129  | 175  |
| LmjF36.6270 | <i>L. major</i> | 47  | 129  | 175  |
| LmjF36.6300 | <i>L. major</i> | 124 | 1    | 124  |
| LmjF36.6300 | <i>L. major</i> | 40  | 206  | 245  |
| LmjF36.6320 | <i>L. major</i> | 43  | 1110 | 1152 |
| LmjF36.6320 | <i>L. major</i> | 40  | 1209 | 1248 |
| LmjF36.6320 | <i>L. major</i> | 118 | 2409 | 2526 |
| LmjF36.6320 | <i>L. major</i> | 47  | 2539 | 2585 |
| LmjF36.6340 | <i>L. major</i> | 51  | 1140 | 1190 |
| LmjF36.6340 | <i>L. major</i> | 68  | 1298 | 1365 |
| LmjF36.6340 | <i>L. major</i> | 41  | 1884 | 1924 |
| LmjF36.6340 | <i>L. major</i> | 147 | 2224 | 2370 |
| LmjF36.6340 | <i>L. major</i> | 91  | 2980 | 3070 |
| LmjF36.6340 | <i>L. major</i> | 67  | 3211 | 3277 |
| LmjF36.6360 | <i>L. major</i> | 46  | 1    | 46   |
| LmjF36.6360 | <i>L. major</i> | 106 | 159  | 264  |
| LmjF36.6370 | <i>L. major</i> | 146 | 70   | 215  |
| LmjF36.6380 | <i>L. major</i> | 45  | 185  | 229  |
| LmjF36.6380 | <i>L. major</i> | 55  | 360  | 414  |
| LmjF36.6380 | <i>L. major</i> | 55  | 360  | 414  |
| LmjF36.6400 | <i>L. major</i> | 168 | 1    | 168  |
| LmjF36.6410 | <i>L. major</i> | 125 | 193  | 317  |
| LmjF36.6410 | <i>L. major</i> | 164 | 333  | 496  |
| LmjF36.6420 | <i>L. major</i> | 53  | 154  | 206  |
| LmjF36.6430 | <i>L. major</i> | 122 | 1    | 122  |
| LmjF36.6430 | <i>L. major</i> | 49  | 183  | 231  |
| LmjF36.6440 | <i>L. major</i> | 66  | 243  | 308  |
| LmjF36.6465 | <i>L. major</i> | 399 | 64   | 462  |
| LmjF36.6480 | <i>L. major</i> | 41  | 351  | 391  |
| LmjF36.6490 | <i>L. major</i> | 141 | 185  | 325  |

|             |                 |     |      |      |
|-------------|-----------------|-----|------|------|
| LmjF36.6500 | <i>L. major</i> | 179 | 59   | 237  |
| LmjF36.6500 | <i>L. major</i> | 54  | 503  | 556  |
| LmjF36.6510 | <i>L. major</i> | 54  | 37   | 90   |
| LmjF36.6520 | <i>L. major</i> | 88  | 96   | 183  |
| LmjF36.6520 | <i>L. major</i> | 361 | 269  | 629  |
| LmjF36.6525 | <i>L. major</i> | 144 | 1    | 144  |
| LmjF36.6525 | <i>L. major</i> | 120 | 477  | 596  |
| LmjF36.6530 | <i>L. major</i> | 168 | 1    | 168  |
| LmjF36.6530 | <i>L. major</i> | 186 | 212  | 397  |
| LmjF36.6560 | <i>L. major</i> | 97  | 93   | 189  |
| LmjF36.6560 | <i>L. major</i> | 88  | 237  | 324  |
| LmjF36.6570 | <i>L. major</i> | 316 | 47   | 362  |
| LmjF36.6590 | <i>L. major</i> | 51  | 1    | 51   |
| LmjF36.6590 | <i>L. major</i> | 153 | 127  | 279  |
| LmjF36.6590 | <i>L. major</i> | 44  | 325  | 368  |
| LmjF36.6590 | <i>L. major</i> | 49  | 405  | 453  |
| LmjF36.6590 | <i>L. major</i> | 45  | 526  | 570  |
| LmjF36.6590 | <i>L. major</i> | 52  | 597  | 648  |
| LmjF36.6600 | <i>L. major</i> | 41  | 478  | 518  |
| LmjF36.6600 | <i>L. major</i> | 43  | 693  | 735  |
| LmjF36.6600 | <i>L. major</i> | 43  | 693  | 735  |
| LmjF36.6610 | <i>L. major</i> | 44  | 1    | 44   |
| LmjF36.6630 | <i>L. major</i> | 49  | 81   | 129  |
| LmjF36.6670 | <i>L. major</i> | 40  | 1    | 40   |
| LmjF36.6680 | <i>L. major</i> | 59  | 84   | 142  |
| LmjF36.6730 | <i>L. major</i> | 84  | 392  | 475  |
| LmjF36.6730 | <i>L. major</i> | 48  | 599  | 646  |
| LmjF36.6730 | <i>L. major</i> | 59  | 838  | 896  |
| LmjF36.6730 | <i>L. major</i> | 40  | 1037 | 1076 |
| LmjF36.6770 | <i>L. major</i> | 48  | 1    | 48   |
| LmjF36.6770 | <i>L. major</i> | 146 | 601  | 746  |
| LmjF36.6780 | <i>L. major</i> | 41  | 252  | 292  |
| LmjF36.6790 | <i>L. major</i> | 46  | 441  | 486  |
| LmjF36.6800 | <i>L. major</i> | 53  | 272  | 324  |
| LmjF36.6840 | <i>L. major</i> | 41  | 1    | 41   |
| LmjF36.6840 | <i>L. major</i> | 69  | 82   | 150  |
| LmjF36.6840 | <i>L. major</i> | 69  | 82   | 150  |
| LmjF36.6850 | <i>L. major</i> | 83  | 584  | 666  |
| LmjF36.6860 | <i>L. major</i> | 103 | 1    | 103  |
| LmjF36.6880 | <i>L. major</i> | 99  | 185  | 283  |
| LmjF36.6890 | <i>L. major</i> | 40  | 389  | 428  |
| LmjF36.6890 | <i>L. major</i> | 41  | 528  | 568  |
| LmjF36.6890 | <i>L. major</i> | 41  | 528  | 568  |
| LmjF36.6900 | <i>L. major</i> | 72  | 154  | 225  |
| LmjF36.6900 | <i>L. major</i> | 356 | 352  | 707  |
| LmjF36.6930 | <i>L. major</i> | 59  | 1    | 59   |
| LmjF36.6930 | <i>L. major</i> | 78  | 79   | 156  |

|                |                    |     |     |     |
|----------------|--------------------|-----|-----|-----|
| LmjF36.6930    | <i>L. major</i>    | 250 | 262 | 511 |
| LmjF36.6960    | <i>L. major</i>    | 326 | 1   | 326 |
| LmjF36.6980    | <i>L. major</i>    | 55  | 1   | 55  |
| LmjF36.6980    | <i>L. major</i>    | 69  | 115 | 183 |
| LmjF36.6980    | <i>L. major</i>    | 50  | 682 | 731 |
| LinJ01_V3.0010 | <i>L. infantum</i> | 47  | 287 | 333 |
| LinJ01_V3.0020 | <i>L. infantum</i> | 92  | 1   | 92  |
| LinJ01_V3.0020 | <i>L. infantum</i> | 50  | 413 | 462 |
| LinJ01_V3.0030 | <i>L. infantum</i> | 62  | 70  | 131 |
| LinJ01_V3.0030 | <i>L. infantum</i> | 43  | 312 | 354 |
| LinJ01_V3.0030 | <i>L. infantum</i> | 128 | 448 | 575 |
| LinJ01_V3.0030 | <i>L. infantum</i> | 44  | 630 | 673 |
| LinJ01_V3.0060 | <i>L. infantum</i> | 112 | 138 | 249 |
| LinJ01_V3.0070 | <i>L. infantum</i> | 68  | 75  | 142 |
| LinJ01_V3.0070 | <i>L. infantum</i> | 72  | 221 | 292 |
| LinJ01_V3.0070 | <i>L. infantum</i> | 93  | 487 | 579 |
| LinJ01_V3.0090 | <i>L. infantum</i> | 46  | 187 | 232 |
| LinJ01_V3.0110 | <i>L. infantum</i> | 74  | 19  | 92  |
| LinJ01_V3.0120 | <i>L. infantum</i> | 153 | 78  | 230 |
| LinJ01_V3.0120 | <i>L. infantum</i> | 48  | 254 | 301 |
| LinJ01_V3.0120 | <i>L. infantum</i> | 338 | 320 | 657 |
| LinJ01_V3.0130 | <i>L. infantum</i> | 46  | 1   | 46  |
| LinJ01_V3.0130 | <i>L. infantum</i> | 187 | 178 | 364 |
| LinJ01_V3.0150 | <i>L. infantum</i> | 42  | 63  | 104 |
| LinJ01_V3.0170 | <i>L. infantum</i> | 220 | 1   | 220 |
| LinJ01_V3.0170 | <i>L. infantum</i> | 110 | 348 | 457 |
| LinJ01_V3.0180 | <i>L. infantum</i> | 46  | 725 | 770 |
| LinJ01_V3.0190 | <i>L. infantum</i> | 69  | 30  | 98  |
| LinJ01_V3.0190 | <i>L. infantum</i> | 74  | 134 | 207 |
| LinJ01_V3.0200 | <i>L. infantum</i> | 93  | 94  | 186 |
| LinJ01_V3.0210 | <i>L. infantum</i> | 105 | 1   | 105 |
| LinJ01_V3.0210 | <i>L. infantum</i> | 159 | 183 | 341 |
| LinJ01_V3.0210 | <i>L. infantum</i> | 110 | 372 | 481 |
| LinJ01_V3.0210 | <i>L. infantum</i> | 55  | 672 | 726 |
| LinJ01_V3.0220 | <i>L. infantum</i> | 53  | 54  | 106 |
| LinJ01_V3.0240 | <i>L. infantum</i> | 51  | 481 | 531 |
| LinJ01_V3.0240 | <i>L. infantum</i> | 131 | 569 | 699 |
| LinJ01_V3.0240 | <i>L. infantum</i> | 131 | 569 | 699 |
| LinJ01_V3.0250 | <i>L. infantum</i> | 45  | 1   | 45  |
| LinJ01_V3.0250 | <i>L. infantum</i> | 184 | 139 | 322 |
| LinJ01_V3.0250 | <i>L. infantum</i> | 308 | 348 | 655 |
| LinJ01_V3.0260 | <i>L. infantum</i> | 281 | 1   | 281 |
| LinJ01_V3.0280 | <i>L. infantum</i> | 42  | 13  | 54  |
| LinJ01_V3.0280 | <i>L. infantum</i> | 40  | 126 | 165 |
| LinJ01_V3.0280 | <i>L. infantum</i> | 40  | 126 | 165 |
| LinJ01_V3.0290 | <i>L. infantum</i> | 54  | 1   | 54  |
| LinJ01_V3.0360 | <i>L. infantum</i> | 133 | 1   | 133 |

|                |                    |     |      |      |
|----------------|--------------------|-----|------|------|
| LinJ01_V3.0370 | <i>L. infantum</i> | 221 | 372  | 592  |
| LinJ01_V3.0370 | <i>L. infantum</i> | 137 | 612  | 748  |
| LinJ01_V3.0380 | <i>L. infantum</i> | 61  | 1    | 61   |
| LinJ01_V3.0380 | <i>L. infantum</i> | 49  | 66   | 114  |
| LinJ01_V3.0380 | <i>L. infantum</i> | 45  | 145  | 189  |
| LinJ01_V3.0400 | <i>L. infantum</i> | 105 | 660  | 764  |
| LinJ01_V3.0410 | <i>L. infantum</i> | 91  | 9    | 99   |
| LinJ01_V3.0410 | <i>L. infantum</i> | 131 | 282  | 412  |
| LinJ01_V3.0410 | <i>L. infantum</i> | 78  | 542  | 619  |
| LinJ01_V3.0420 | <i>L. infantum</i> | 69  | 1    | 69   |
| LinJ01_V3.0420 | <i>L. infantum</i> | 58  | 145  | 202  |
| LinJ01_V3.0420 | <i>L. infantum</i> | 162 | 290  | 451  |
| LinJ01_V3.0430 | <i>L. infantum</i> | 42  | 1    | 42   |
| LinJ01_V3.0440 | <i>L. infantum</i> | 42  | 1    | 42   |
| LinJ01_V3.0450 | <i>L. infantum</i> | 72  | 53   | 124  |
| LinJ01_V3.0450 | <i>L. infantum</i> | 133 | 239  | 371  |
| LinJ01_V3.0450 | <i>L. infantum</i> | 84  | 492  | 575  |
| LinJ01_V3.0450 | <i>L. infantum</i> | 60  | 577  | 636  |
| LinJ01_V3.0450 | <i>L. infantum</i> | 64  | 681  | 744  |
| LinJ01_V3.0460 | <i>L. infantum</i> | 56  | 269  | 324  |
| LinJ01_V3.0480 | <i>L. infantum</i> | 341 | 1    | 341  |
| LinJ01_V3.0480 | <i>L. infantum</i> | 46  | 772  | 817  |
| LinJ01_V3.0480 | <i>L. infantum</i> | 220 | 920  | 1139 |
| LinJ01_V3.0480 | <i>L. infantum</i> | 276 | 1163 | 1438 |
| LinJ01_V3.0550 | <i>L. infantum</i> | 91  | 18   | 108  |
| LinJ01_V3.0550 | <i>L. infantum</i> | 177 | 143  | 319  |
| LinJ01_V3.0550 | <i>L. infantum</i> | 75  | 405  | 479  |
| LinJ01_V3.0550 | <i>L. infantum</i> | 72  | 517  | 588  |
| LinJ01_V3.0550 | <i>L. infantum</i> | 386 | 667  | 1052 |
| LinJ01_V3.0550 | <i>L. infantum</i> | 48  | 1100 | 1147 |
| LinJ01_V3.0550 | <i>L. infantum</i> | 50  | 1497 | 1546 |
| LinJ01_V3.0550 | <i>L. infantum</i> | 47  | 1593 | 1639 |
| LinJ01_V3.0560 | <i>L. infantum</i> | 102 | 1    | 102  |
| LinJ01_V3.0560 | <i>L. infantum</i> | 114 | 161  | 274  |
| LinJ01_V3.0560 | <i>L. infantum</i> | 107 | 349  | 455  |
| LinJ01_V3.0560 | <i>L. infantum</i> | 183 | 460  | 642  |
| LinJ01_V3.0570 | <i>L. infantum</i> | 81  | 87   | 167  |
| LinJ01_V3.0570 | <i>L. infantum</i> | 92  | 196  | 287  |
| LinJ01_V3.0580 | <i>L. infantum</i> | 235 | 1    | 235  |
| LinJ01_V3.0580 | <i>L. infantum</i> | 80  | 311  | 390  |
| LinJ01_V3.0600 | <i>L. infantum</i> | 126 | 1    | 126  |
| LinJ01_V3.0600 | <i>L. infantum</i> | 76  | 287  | 362  |
| LinJ01_V3.0600 | <i>L. infantum</i> | 63  | 508  | 570  |
| LinJ01_V3.0630 | <i>L. infantum</i> | 48  | 158  | 205  |
| LinJ01_V3.0640 | <i>L. infantum</i> | 55  | 1    | 55   |
| LinJ01_V3.0640 | <i>L. infantum</i> | 50  | 134  | 183  |
| LinJ01_V3.0640 | <i>L. infantum</i> | 149 | 245  | 393  |

|                |                    |     |      |      |
|----------------|--------------------|-----|------|------|
| LinJ01_V3.0640 | <i>L. infantum</i> | 41  | 408  | 448  |
| LinJ01_V3.0650 | <i>L. infantum</i> | 177 | 1    | 177  |
| LinJ01_V3.0650 | <i>L. infantum</i> | 56  | 208  | 263  |
| LinJ01_V3.0650 | <i>L. infantum</i> | 56  | 265  | 320  |
| LinJ01_V3.0650 | <i>L. infantum</i> | 561 | 342  | 902  |
| LinJ01_V3.0660 | <i>L. infantum</i> | 42  | 1    | 42   |
| LinJ01_V3.0660 | <i>L. infantum</i> | 78  | 146  | 223  |
| LinJ01_V3.0660 | <i>L. infantum</i> | 70  | 321  | 390  |
| LinJ01_V3.0660 | <i>L. infantum</i> | 93  | 882  | 974  |
| LinJ01_V3.0680 | <i>L. infantum</i> | 301 | 1    | 301  |
| LinJ01_V3.0680 | <i>L. infantum</i> | 109 | 343  | 451  |
| LinJ01_V3.0680 | <i>L. infantum</i> | 77  | 510  | 586  |
| LinJ01_V3.0680 | <i>L. infantum</i> | 68  | 760  | 827  |
| LinJ01_V3.0680 | <i>L. infantum</i> | 51  | 882  | 932  |
| LinJ01_V3.0680 | <i>L. infantum</i> | 209 | 949  | 1157 |
| LinJ01_V3.0680 | <i>L. infantum</i> | 59  | 1376 | 1434 |
| LinJ01_V3.0690 | <i>L. infantum</i> | 84  | 23   | 106  |
| LinJ01_V3.0690 | <i>L. infantum</i> | 187 | 116  | 302  |
| LinJ01_V3.0700 | <i>L. infantum</i> | 113 | 46   | 158  |
| LinJ01_V3.0700 | <i>L. infantum</i> | 284 | 183  | 466  |
| LinJ01_V3.0700 | <i>L. infantum</i> | 308 | 494  | 801  |
| LinJ01_V3.0720 | <i>L. infantum</i> | 93  | 32   | 124  |
| LinJ01_V3.0720 | <i>L. infantum</i> | 83  | 143  | 225  |
| LinJ01_V3.0720 | <i>L. infantum</i> | 79  | 332  | 410  |
| LinJ01_V3.0730 | <i>L. infantum</i> | 51  | 270  | 320  |
| LinJ01_V3.0740 | <i>L. infantum</i> | 79  | 35   | 113  |
| LinJ01_V3.0740 | <i>L. infantum</i> | 44  | 435  | 478  |
| LinJ01_V3.0740 | <i>L. infantum</i> | 56  | 507  | 562  |
| LinJ01_V3.0740 | <i>L. infantum</i> | 77  | 857  | 933  |
| LinJ01_V3.0740 | <i>L. infantum</i> | 49  | 1149 | 1197 |
| LinJ01_V3.0740 | <i>L. infantum</i> | 62  | 1242 | 1303 |
| LinJ01_V3.0750 | <i>L. infantum</i> | 80  | 1    | 80   |
| LinJ01_V3.0750 | <i>L. infantum</i> | 186 | 127  | 312  |
| LinJ01_V3.0750 | <i>L. infantum</i> | 115 | 415  | 529  |
| LinJ01_V3.0750 | <i>L. infantum</i> | 80  | 733  | 812  |
| LinJ01_V3.0750 | <i>L. infantum</i> | 65  | 923  | 987  |
| LinJ01_V3.0750 | <i>L. infantum</i> | 102 | 1003 | 1104 |
| LinJ01_V3.0750 | <i>L. infantum</i> | 77  | 1331 | 1407 |
| LinJ01_V3.0750 | <i>L. infantum</i> | 116 | 1785 | 1900 |
| LinJ01_V3.0750 | <i>L. infantum</i> | 101 | 2194 | 2294 |
| LinJ01_V3.0760 | <i>L. infantum</i> | 147 | 119  | 265  |
| LinJ01_V3.0760 | <i>L. infantum</i> | 180 | 386  | 565  |
| LinJ01_V3.0780 | <i>L. infantum</i> | 54  | 48   | 101  |
| LinJ01_V3.0810 | <i>L. infantum</i> | 162 | 1    | 162  |
| LinJ01_V3.0810 | <i>L. infantum</i> | 218 | 175  | 392  |
| LinJ01_V3.0810 | <i>L. infantum</i> | 66  | 397  | 462  |
| LinJ01_V3.0820 | <i>L. infantum</i> | 212 | 1    | 212  |

|                |                    |     |      |      |
|----------------|--------------------|-----|------|------|
| LinJ01_V3.0820 | <i>L. infantum</i> | 108 | 383  | 490  |
| LinJ01_V3.0830 | <i>L. infantum</i> | 174 | 551  | 724  |
| LinJ01_V3.0840 | <i>L. infantum</i> | 82  | 89   | 170  |
| LinJ01_V3.0840 | <i>L. infantum</i> | 140 | 815  | 954  |
| LinJ02_V3.0030 | <i>L. infantum</i> | 40  | 83   | 122  |
| LinJ02_V3.0040 | <i>L. infantum</i> | 64  | 334  | 397  |
| LinJ02_V3.0050 | <i>L. infantum</i> | 51  | 1    | 51   |
| LinJ02_V3.0050 | <i>L. infantum</i> | 44  | 777  | 820  |
| LinJ02_V3.0050 | <i>L. infantum</i> | 63  | 931  | 993  |
| LinJ02_V3.0060 | <i>L. infantum</i> | 139 | 1    | 139  |
| LinJ02_V3.0070 | <i>L. infantum</i> | 128 | 27   | 154  |
| LinJ02_V3.0070 | <i>L. infantum</i> | 52  | 303  | 354  |
| LinJ02_V3.0080 | <i>L. infantum</i> | 150 | 27   | 176  |
| LinJ02_V3.0080 | <i>L. infantum</i> | 258 | 207  | 464  |
| LinJ02_V3.0080 | <i>L. infantum</i> | 93  | 691  | 783  |
| LinJ02_V3.0080 | <i>L. infantum</i> | 78  | 841  | 918  |
| LinJ02_V3.0090 | <i>L. infantum</i> | 120 | 715  | 834  |
| LinJ02_V3.0100 | <i>L. infantum</i> | 143 | 108  | 250  |
| LinJ02_V3.0100 | <i>L. infantum</i> | 41  | 513  | 553  |
| LinJ02_V3.0100 | <i>L. infantum</i> | 135 | 643  | 777  |
| LinJ02_V3.0100 | <i>L. infantum</i> | 42  | 922  | 963  |
| LinJ02_V3.0100 | <i>L. infantum</i> | 41  | 1108 | 1148 |
| LinJ02_V3.0100 | <i>L. infantum</i> | 41  | 1189 | 1229 |
| LinJ02_V3.0100 | <i>L. infantum</i> | 115 | 1270 | 1384 |
| LinJ02_V3.0100 | <i>L. infantum</i> | 72  | 1414 | 1485 |
| LinJ02_V3.0100 | <i>L. infantum</i> | 76  | 2052 | 2127 |
| LinJ02_V3.0100 | <i>L. infantum</i> | 44  | 2173 | 2216 |
| LinJ02_V3.0100 | <i>L. infantum</i> | 76  | 2610 | 2685 |
| LinJ02_V3.0100 | <i>L. infantum</i> | 45  | 2719 | 2763 |
| LinJ02_V3.0100 | <i>L. infantum</i> | 51  | 2932 | 2982 |
| LinJ02_V3.0100 | <i>L. infantum</i> | 106 | 3033 | 3138 |
| LinJ02_V3.0100 | <i>L. infantum</i> | 40  | 3286 | 3325 |
| LinJ02_V3.0100 | <i>L. infantum</i> | 116 | 3518 | 3633 |
| LinJ02_V3.0100 | <i>L. infantum</i> | 57  | 3656 | 3712 |
| LinJ02_V3.0100 | <i>L. infantum</i> | 70  | 3856 | 3925 |
| LinJ02_V3.0100 | <i>L. infantum</i> | 80  | 4122 | 4201 |
| LinJ02_V3.0100 | <i>L. infantum</i> | 44  | 4823 | 4866 |
| LinJ02_V3.0110 | <i>L. infantum</i> | 64  | 55   | 118  |
| LinJ02_V3.0120 | <i>L. infantum</i> | 52  | 83   | 134  |
| LinJ02_V3.0120 | <i>L. infantum</i> | 41  | 301  | 341  |
| LinJ02_V3.0120 | <i>L. infantum</i> | 93  | 480  | 572  |
| LinJ02_V3.0130 | <i>L. infantum</i> | 257 | 76   | 332  |
| LinJ02_V3.0130 | <i>L. infantum</i> | 41  | 348  | 388  |
| LinJ02_V3.0130 | <i>L. infantum</i> | 72  | 479  | 550  |
| LinJ02_V3.0130 | <i>L. infantum</i> | 110 | 574  | 683  |
| LinJ02_V3.0130 | <i>L. infantum</i> | 41  | 749  | 789  |
| LinJ02_V3.0130 | <i>L. infantum</i> | 104 | 798  | 901  |

|                |                    |     |      |      |
|----------------|--------------------|-----|------|------|
| LinJ02_V3.0130 | <i>L. infantum</i> | 46  | 955  | 1000 |
| LinJ02_V3.0130 | <i>L. infantum</i> | 81  | 1110 | 1190 |
| LinJ02_V3.0130 | <i>L. infantum</i> | 60  | 1447 | 1506 |
| LinJ02_V3.0130 | <i>L. infantum</i> | 124 | 1802 | 1925 |
| LinJ02_V3.0140 | <i>L. infantum</i> | 66  | 34   | 99   |
| LinJ02_V3.0140 | <i>L. infantum</i> | 45  | 346  | 390  |
| LinJ02_V3.0140 | <i>L. infantum</i> | 45  | 346  | 390  |
| LinJ02_V3.0160 | <i>L. infantum</i> | 45  | 165  | 209  |
| LinJ02_V3.0180 | <i>L. infantum</i> | 75  | 46   | 120  |
| LinJ02_V3.0180 | <i>L. infantum</i> | 45  | 374  | 418  |
| LinJ02_V3.0180 | <i>L. infantum</i> | 44  | 588  | 631  |
| LinJ02_V3.0190 | <i>L. infantum</i> | 47  | 1    | 47   |
| LinJ02_V3.0190 | <i>L. infantum</i> | 43  | 427  | 469  |
| LinJ02_V3.0190 | <i>L. infantum</i> | 43  | 427  | 469  |
| LinJ02_V3.0200 | <i>L. infantum</i> | 130 | 1    | 130  |
| LinJ02_V3.0200 | <i>L. infantum</i> | 53  | 140  | 192  |
| LinJ02_V3.0200 | <i>L. infantum</i> | 44  | 340  | 383  |
| LinJ02_V3.0200 | <i>L. infantum</i> | 52  | 733  | 784  |
| LinJ02_V3.0210 | <i>L. infantum</i> | 80  | 100  | 179  |
| LinJ02_V3.0210 | <i>L. infantum</i> | 57  | 228  | 284  |
| LinJ02_V3.0210 | <i>L. infantum</i> | 41  | 334  | 374  |
| LinJ02_V3.0220 | <i>L. infantum</i> | 47  | 47   | 93   |
| LinJ02_V3.0220 | <i>L. infantum</i> | 41  | 606  | 646  |
| LinJ02_V3.0220 | <i>L. infantum</i> | 105 | 654  | 758  |
| LinJ02_V3.0220 | <i>L. infantum</i> | 41  | 955  | 995  |
| LinJ02_V3.0220 | <i>L. infantum</i> | 43  | 1034 | 1076 |
| LinJ02_V3.0220 | <i>L. infantum</i> | 48  | 1099 | 1146 |
| LinJ02_V3.0230 | <i>L. infantum</i> | 88  | 187  | 274  |
| LinJ02_V3.0250 | <i>L. infantum</i> | 97  | 73   | 169  |
| LinJ02_V3.0260 | <i>L. infantum</i> | 121 | 10   | 130  |
| LinJ02_V3.0260 | <i>L. infantum</i> | 43  | 452  | 494  |
| LinJ02_V3.0260 | <i>L. infantum</i> | 43  | 452  | 494  |
| LinJ02_V3.0270 | <i>L. infantum</i> | 402 | 1    | 402  |
| LinJ02_V3.0270 | <i>L. infantum</i> | 84  | 771  | 854  |
| LinJ02_V3.0270 | <i>L. infantum</i> | 141 | 1109 | 1249 |
| LinJ02_V3.0270 | <i>L. infantum</i> | 212 | 1515 | 1726 |
| LinJ02_V3.0270 | <i>L. infantum</i> | 100 | 2177 | 2276 |
| LinJ02_V3.0270 | <i>L. infantum</i> | 45  | 2620 | 2664 |
| LinJ02_V3.0280 | <i>L. infantum</i> | 147 | 1    | 147  |
| LinJ02_V3.0280 | <i>L. infantum</i> | 92  | 182  | 273  |
| LinJ02_V3.0280 | <i>L. infantum</i> | 108 | 401  | 508  |
| LinJ02_V3.0290 | <i>L. infantum</i> | 85  | 168  | 252  |
| LinJ02_V3.0300 | <i>L. infantum</i> | 56  | 1    | 56   |
| LinJ02_V3.0300 | <i>L. infantum</i> | 102 | 86   | 187  |
| LinJ02_V3.0300 | <i>L. infantum</i> | 49  | 469  | 517  |
| LinJ02_V3.0300 | <i>L. infantum</i> | 80  | 565  | 644  |
| LinJ02_V3.0300 | <i>L. infantum</i> | 44  | 989  | 1032 |



|                |                    |     |      |      |
|----------------|--------------------|-----|------|------|
| LinJ02_V3.0300 | <i>L. infantum</i> | 158 | 1192 | 1349 |
| LinJ02_V3.0300 | <i>L. infantum</i> | 83  | 1378 | 1460 |
| LinJ02_V3.0310 | <i>L. infantum</i> | 46  | 1    | 46   |
| LinJ02_V3.0310 | <i>L. infantum</i> | 120 | 106  | 225  |
| LinJ02_V3.0310 | <i>L. infantum</i> | 154 | 291  | 444  |
| LinJ02_V3.0310 | <i>L. infantum</i> | 95  | 540  | 634  |
| LinJ02_V3.0310 | <i>L. infantum</i> | 82  | 678  | 759  |
| LinJ02_V3.0310 | <i>L. infantum</i> | 63  | 826  | 888  |
| LinJ02_V3.0320 | <i>L. infantum</i> | 311 | 1    | 311  |
| LinJ02_V3.0320 | <i>L. infantum</i> | 57  | 335  | 391  |
| LinJ02_V3.0320 | <i>L. infantum</i> | 52  | 413  | 464  |
| LinJ02_V3.0320 | <i>L. infantum</i> | 70  | 686  | 755  |
| LinJ02_V3.0320 | <i>L. infantum</i> | 141 | 886  | 1026 |
| LinJ02_V3.0340 | <i>L. infantum</i> | 55  | 475  | 529  |
| LinJ02_V3.0350 | <i>L. infantum</i> | 62  | 263  | 324  |
| LinJ02_V3.0350 | <i>L. infantum</i> | 73  | 385  | 457  |
| LinJ02_V3.0380 | <i>L. infantum</i> | 121 | 51   | 171  |
| LinJ02_V3.0380 | <i>L. infantum</i> | 56  | 208  | 263  |
| LinJ02_V3.0380 | <i>L. infantum</i> | 200 | 265  | 464  |
| LinJ02_V3.0380 | <i>L. infantum</i> | 141 | 561  | 701  |
| LinJ02_V3.0380 | <i>L. infantum</i> | 70  | 735  | 804  |
| LinJ02_V3.0380 | <i>L. infantum</i> | 74  | 900  | 973  |
| LinJ02_V3.0390 | <i>L. infantum</i> | 95  | 203  | 297  |
| LinJ02_V3.0390 | <i>L. infantum</i> | 67  | 397  | 463  |
| LinJ02_V3.0390 | <i>L. infantum</i> | 157 | 515  | 671  |
| LinJ02_V3.0390 | <i>L. infantum</i> | 48  | 943  | 990  |
| LinJ02_V3.0400 | <i>L. infantum</i> | 48  | 87   | 134  |
| LinJ02_V3.0440 | <i>L. infantum</i> | 294 | 1    | 294  |
| LinJ02_V3.0440 | <i>L. infantum</i> | 250 | 320  | 569  |
| LinJ02_V3.0440 | <i>L. infantum</i> | 384 | 620  | 1003 |
| LinJ02_V3.0440 | <i>L. infantum</i> | 65  | 1027 | 1091 |
| LinJ02_V3.0440 | <i>L. infantum</i> | 167 | 1154 | 1320 |
| LinJ02_V3.0440 | <i>L. infantum</i> | 487 | 1322 | 1808 |
| LinJ02_V3.0440 | <i>L. infantum</i> | 482 | 1838 | 2319 |
| LinJ02_V3.0440 | <i>L. infantum</i> | 390 | 2349 | 2738 |
| LinJ02_V3.0440 | <i>L. infantum</i> | 493 | 2764 | 3256 |
| LinJ02_V3.0440 | <i>L. infantum</i> | 168 | 3267 | 3434 |
| LinJ02_V3.0440 | <i>L. infantum</i> | 128 | 3456 | 3583 |
| LinJ02_V3.0450 | <i>L. infantum</i> | 152 | 1    | 152  |
| LinJ02_V3.0460 | <i>L. infantum</i> | 100 | 82   | 181  |
| LinJ02_V3.0460 | <i>L. infantum</i> | 72  | 252  | 323  |
| LinJ02_V3.0460 | <i>L. infantum</i> | 74  | 400  | 473  |
| LinJ02_V3.0460 | <i>L. infantum</i> | 166 | 496  | 661  |
| LinJ02_V3.0470 | <i>L. infantum</i> | 100 | 1    | 100  |
| LinJ02_V3.0470 | <i>L. infantum</i> | 56  | 135  | 190  |
| LinJ02_V3.0470 | <i>L. infantum</i> | 62  | 512  | 573  |
| LinJ02_V3.0480 | <i>L. infantum</i> | 170 | 1    | 170  |

|                |                    |     |      |      |
|----------------|--------------------|-----|------|------|
| LinJ02_V3.0490 | <i>L. infantum</i> | 250 | 1    | 250  |
| LinJ02_V3.0490 | <i>L. infantum</i> | 141 | 286  | 426  |
| LinJ02_V3.0490 | <i>L. infantum</i> | 810 | 434  | 1243 |
| LinJ02_V3.0490 | <i>L. infantum</i> | 601 | 1251 | 1851 |
| LinJ02_V3.0490 | <i>L. infantum</i> | 206 | 1886 | 2091 |
| LinJ02_V3.0500 | <i>L. infantum</i> | 131 | 64   | 194  |
| LinJ02_V3.0500 | <i>L. infantum</i> | 106 | 225  | 330  |
| LinJ02_V3.0500 | <i>L. infantum</i> | 46  | 366  | 411  |
| LinJ02_V3.0500 | <i>L. infantum</i> | 86  | 459  | 544  |
| LinJ02_V3.0500 | <i>L. infantum</i> | 174 | 548  | 721  |
| LinJ02_V3.0500 | <i>L. infantum</i> | 42  | 728  | 769  |
| LinJ02_V3.0510 | <i>L. infantum</i> | 44  | 214  | 257  |
| LinJ02_V3.0520 | <i>L. infantum</i> | 73  | 33   | 105  |
| LinJ02_V3.0530 | <i>L. infantum</i> | 65  | 1    | 65   |
| LinJ02_V3.0530 | <i>L. infantum</i> | 50  | 324  | 373  |
| LinJ02_V3.0530 | <i>L. infantum</i> | 84  | 439  | 522  |
| LinJ02_V3.0530 | <i>L. infantum</i> | 254 | 594  | 847  |
| LinJ02_V3.0540 | <i>L. infantum</i> | 59  | 205  | 263  |
| LinJ02_V3.0540 | <i>L. infantum</i> | 164 | 272  | 435  |
| LinJ02_V3.0540 | <i>L. infantum</i> | 46  | 558  | 603  |
| LinJ02_V3.0540 | <i>L. infantum</i> | 51  | 627  | 677  |
| LinJ02_V3.0540 | <i>L. infantum</i> | 70  | 912  | 981  |
| LinJ02_V3.0560 | <i>L. infantum</i> | 137 | 1    | 137  |
| LinJ02_V3.0560 | <i>L. infantum</i> | 90  | 256  | 345  |
| LinJ02_V3.0560 | <i>L. infantum</i> | 170 | 355  | 524  |
| LinJ02_V3.0580 | <i>L. infantum</i> | 69  | 1    | 69   |
| LinJ02_V3.0580 | <i>L. infantum</i> | 191 | 106  | 296  |
| LinJ02_V3.0590 | <i>L. infantum</i> | 126 | 1    | 126  |
| LinJ02_V3.0590 | <i>L. infantum</i> | 43  | 268  | 310  |
| LinJ02_V3.0590 | <i>L. infantum</i> | 43  | 268  | 310  |
| LinJ02_V3.0600 | <i>L. infantum</i> | 242 | 1    | 242  |
| LinJ02_V3.0600 | <i>L. infantum</i> | 45  | 288  | 332  |
| LinJ02_V3.0610 | <i>L. infantum</i> | 97  | 83   | 179  |
| LinJ02_V3.0610 | <i>L. infantum</i> | 160 | 262  | 421  |
| LinJ02_V3.0610 | <i>L. infantum</i> | 82  | 536  | 617  |
| LinJ02_V3.0610 | <i>L. infantum</i> | 60  | 1088 | 1147 |
| LinJ02_V3.0610 | <i>L. infantum</i> | 49  | 1213 | 1261 |
| LinJ02_V3.0610 | <i>L. infantum</i> | 46  | 1359 | 1404 |
| LinJ02_V3.0620 | <i>L. infantum</i> | 51  | 1    | 51   |
| LinJ02_V3.0620 | <i>L. infantum</i> | 86  | 122  | 207  |
| LinJ02_V3.0630 | <i>L. infantum</i> | 239 | 1    | 239  |
| LinJ02_V3.0630 | <i>L. infantum</i> | 268 | 252  | 519  |
| LinJ02_V3.0630 | <i>L. infantum</i> | 140 | 771  | 910  |
| LinJ02_V3.0660 | <i>L. infantum</i> | 263 | 1    | 263  |
| LinJ02_V3.0660 | <i>L. infantum</i> | 40  | 275  | 314  |
| LinJ02_V3.0660 | <i>L. infantum</i> | 96  | 345  | 440  |
| LinJ02_V3.0670 | <i>L. infantum</i> | 53  | 1    | 53   |

|                |                    |      |      |      |
|----------------|--------------------|------|------|------|
| LinJ02_V3.0670 | <i>L. infantum</i> | 166  | 112  | 277  |
| LinJ02_V3.0670 | <i>L. infantum</i> | 56   | 287  | 342  |
| LinJ02_V3.0670 | <i>L. infantum</i> | 99   | 350  | 448  |
| LinJ02_V3.0670 | <i>L. infantum</i> | 120  | 595  | 714  |
| LinJ02_V3.0670 | <i>L. infantum</i> | 158  | 779  | 936  |
| LinJ02_V3.0680 | <i>L. infantum</i> | 99   | 1    | 99   |
| LinJ02_V3.0680 | <i>L. infantum</i> | 88   | 335  | 422  |
| LinJ02_V3.0680 | <i>L. infantum</i> | 88   | 335  | 422  |
| LinJ02_V3.0700 | <i>L. infantum</i> | 56   | 97   | 152  |
| LinJ02_V3.0710 | <i>L. infantum</i> | 45   | 139  | 183  |
| LinJ02_V3.0710 | <i>L. infantum</i> | 41   | 277  | 317  |
| LinJ02_V3.0710 | <i>L. infantum</i> | 41   | 277  | 317  |
| LinJ02_V3.0720 | <i>L. infantum</i> | 254  | 103  | 356  |
| LinJ02_V3.0720 | <i>L. infantum</i> | 40   | 381  | 420  |
| LinJ02_V3.0740 | <i>L. infantum</i> | 263  | 1    | 263  |
| LinJ02_V3.0740 | <i>L. infantum</i> | 40   | 275  | 314  |
| LinJ02_V3.0740 | <i>L. infantum</i> | 96   | 345  | 440  |
| LinJ03_V3.0020 | <i>L. infantum</i> | 64   | 43   | 106  |
| LinJ03_V3.0080 | <i>L. infantum</i> | 51   | 86   | 136  |
| LinJ03_V3.0080 | <i>L. infantum</i> | 46   | 522  | 567  |
| LinJ03_V3.0080 | <i>L. infantum</i> | 46   | 522  | 567  |
| LinJ03_V3.0100 | <i>L. infantum</i> | 349  | 169  | 517  |
| LinJ03_V3.0100 | <i>L. infantum</i> | 87   | 597  | 683  |
| LinJ03_V3.0100 | <i>L. infantum</i> | 52   | 704  | 755  |
| LinJ03_V3.0110 | <i>L. infantum</i> | 493  | 202  | 694  |
| LinJ03_V3.0110 | <i>L. infantum</i> | 59   | 703  | 761  |
| LinJ03_V3.0110 | <i>L. infantum</i> | 146  | 780  | 925  |
| LinJ03_V3.0130 | <i>L. infantum</i> | 94   | 46   | 139  |
| LinJ03_V3.0150 | <i>L. infantum</i> | 95   | 91   | 185  |
| LinJ03_V3.0150 | <i>L. infantum</i> | 42   | 438  | 479  |
| LinJ03_V3.0150 | <i>L. infantum</i> | 42   | 438  | 479  |
| LinJ03_V3.0160 | <i>L. infantum</i> | 61   | 43   | 103  |
| LinJ03_V3.0160 | <i>L. infantum</i> | 75   | 117  | 191  |
| LinJ03_V3.0170 | <i>L. infantum</i> | 317  | 100  | 416  |
| LinJ03_V3.0170 | <i>L. infantum</i> | 55   | 578  | 632  |
| LinJ03_V3.0170 | <i>L. infantum</i> | 59   | 669  | 727  |
| LinJ03_V3.0180 | <i>L. infantum</i> | 48   | 163  | 210  |
| LinJ03_V3.0210 | <i>L. infantum</i> | 45   | 45   | 89   |
| LinJ03_V3.0250 | <i>L. infantum</i> | 77   | 36   | 112  |
| LinJ03_V3.0250 | <i>L. infantum</i> | 79   | 126  | 204  |
| LinJ03_V3.0250 | <i>L. infantum</i> | 79   | 126  | 204  |
| LinJ03_V3.0260 | <i>L. infantum</i> | 69   | 84   | 152  |
| LinJ03_V3.0260 | <i>L. infantum</i> | 1875 | 169  | 2043 |
| LinJ03_V3.0260 | <i>L. infantum</i> | 69   | 2075 | 2143 |
| LinJ03_V3.0270 | <i>L. infantum</i> | 110  | 1    | 110  |
| LinJ03_V3.0270 | <i>L. infantum</i> | 164  | 128  | 291  |
| LinJ03_V3.0270 | <i>L. infantum</i> | 125  | 339  | 463  |

|                |                    |     |      |      |
|----------------|--------------------|-----|------|------|
| LinJ03_V3.0270 | <i>L. infantum</i> | 87  | 651  | 737  |
| LinJ03_V3.0270 | <i>L. infantum</i> | 117 | 795  | 911  |
| LinJ03_V3.0270 | <i>L. infantum</i> | 56  | 913  | 968  |
| LinJ03_V3.0300 | <i>L. infantum</i> | 180 | 1    | 180  |
| LinJ03_V3.0300 | <i>L. infantum</i> | 451 | 185  | 635  |
| LinJ03_V3.0300 | <i>L. infantum</i> | 109 | 768  | 876  |
| LinJ03_V3.0300 | <i>L. infantum</i> | 163 | 881  | 1043 |
| LinJ03_V3.0310 | <i>L. infantum</i> | 41  | 1    | 41   |
| LinJ03_V3.0310 | <i>L. infantum</i> | 82  | 193  | 274  |
| LinJ03_V3.0310 | <i>L. infantum</i> | 89  | 311  | 399  |
| LinJ03_V3.0310 | <i>L. infantum</i> | 48  | 583  | 630  |
| LinJ03_V3.0320 | <i>L. infantum</i> | 233 | 30   | 262  |
| LinJ03_V3.0330 | <i>L. infantum</i> | 282 | 1    | 282  |
| LinJ03_V3.0330 | <i>L. infantum</i> | 63  | 348  | 410  |
| LinJ03_V3.0330 | <i>L. infantum</i> | 275 | 458  | 732  |
| LinJ03_V3.0330 | <i>L. infantum</i> | 83  | 973  | 1055 |
| LinJ03_V3.0330 | <i>L. infantum</i> | 89  | 1085 | 1173 |
| LinJ03_V3.0330 | <i>L. infantum</i> | 208 | 1247 | 1454 |
| LinJ03_V3.0350 | <i>L. infantum</i> | 51  | 1    | 51   |
| LinJ03_V3.0350 | <i>L. infantum</i> | 71  | 53   | 123  |
| LinJ03_V3.0350 | <i>L. infantum</i> | 71  | 53   | 123  |
| LinJ03_V3.0360 | <i>L. infantum</i> | 75  | 1    | 75   |
| LinJ03_V3.0360 | <i>L. infantum</i> | 53  | 78   | 130  |
| LinJ03_V3.0370 | <i>L. infantum</i> | 57  | 37   | 93   |
| LinJ03_V3.0370 | <i>L. infantum</i> | 43  | 206  | 248  |
| LinJ03_V3.0370 | <i>L. infantum</i> | 43  | 206  | 248  |
| LinJ03_V3.0390 | <i>L. infantum</i> | 81  | 1    | 81   |
| LinJ03_V3.0390 | <i>L. infantum</i> | 108 | 285  | 392  |
| LinJ03_V3.0390 | <i>L. infantum</i> | 108 | 285  | 392  |
| LinJ03_V3.0400 | <i>L. infantum</i> | 168 | 1    | 168  |
| LinJ03_V3.0400 | <i>L. infantum</i> | 57  | 184  | 240  |
| LinJ03_V3.0400 | <i>L. infantum</i> | 293 | 250  | 542  |
| LinJ03_V3.0400 | <i>L. infantum</i> | 43  | 576  | 618  |
| LinJ03_V3.0400 | <i>L. infantum</i> | 56  | 714  | 769  |
| LinJ03_V3.0400 | <i>L. infantum</i> | 51  | 906  | 956  |
| LinJ03_V3.0400 | <i>L. infantum</i> | 267 | 1246 | 1512 |
| LinJ03_V3.0400 | <i>L. infantum</i> | 80  | 1592 | 1671 |
| LinJ03_V3.0410 | <i>L. infantum</i> | 67  | 46   | 112  |
| LinJ03_V3.0420 | <i>L. infantum</i> | 61  | 51   | 111  |
| LinJ03_V3.0430 | <i>L. infantum</i> | 52  | 1    | 52   |
| LinJ03_V3.0430 | <i>L. infantum</i> | 118 | 104  | 221  |
| LinJ03_V3.0430 | <i>L. infantum</i> | 102 | 254  | 355  |
| LinJ03_V3.0430 | <i>L. infantum</i> | 82  | 411  | 492  |
| LinJ03_V3.0430 | <i>L. infantum</i> | 46  | 672  | 717  |
| LinJ03_V3.0430 | <i>L. infantum</i> | 84  | 794  | 877  |
| LinJ03_V3.0430 | <i>L. infantum</i> | 198 | 920  | 1117 |
| LinJ03_V3.0430 | <i>L. infantum</i> | 44  | 1186 | 1229 |

|                |                    |     |      |      |
|----------------|--------------------|-----|------|------|
| LinJ03_V3.0430 | <i>L. infantum</i> | 63  | 1285 | 1347 |
| LinJ03_V3.0430 | <i>L. infantum</i> | 47  | 1371 | 1417 |
| LinJ03_V3.0430 | <i>L. infantum</i> | 76  | 1465 | 1540 |
| LinJ03_V3.0440 | <i>L. infantum</i> | 388 | 1    | 388  |
| LinJ03_V3.0440 | <i>L. infantum</i> | 110 | 424  | 533  |
| LinJ03_V3.0440 | <i>L. infantum</i> | 70  | 562  | 631  |
| LinJ03_V3.0440 | <i>L. infantum</i> | 109 | 648  | 756  |
| LinJ03_V3.0440 | <i>L. infantum</i> | 52  | 765  | 816  |
| LinJ03_V3.0440 | <i>L. infantum</i> | 227 | 834  | 1060 |
| LinJ03_V3.0450 | <i>L. infantum</i> | 106 | 49   | 154  |
| LinJ03_V3.0450 | <i>L. infantum</i> | 43  | 231  | 273  |
| LinJ03_V3.0450 | <i>L. infantum</i> | 197 | 347  | 543  |
| LinJ03_V3.0450 | <i>L. infantum</i> | 84  | 874  | 957  |
| LinJ03_V3.0460 | <i>L. infantum</i> | 40  | 348  | 387  |
| LinJ03_V3.0470 | <i>L. infantum</i> | 83  | 11   | 93   |
| LinJ03_V3.0470 | <i>L. infantum</i> | 437 | 130  | 566  |
| LinJ03_V3.0470 | <i>L. infantum</i> | 77  | 612  | 688  |
| LinJ03_V3.0470 | <i>L. infantum</i> | 151 | 959  | 1109 |
| LinJ03_V3.0480 | <i>L. infantum</i> | 119 | 252  | 370  |
| LinJ03_V3.0490 | <i>L. infantum</i> | 61  | 48   | 108  |
| LinJ03_V3.0490 | <i>L. infantum</i> | 210 | 124  | 333  |
| LinJ03_V3.0490 | <i>L. infantum</i> | 154 | 361  | 514  |
| LinJ03_V3.0490 | <i>L. infantum</i> | 729 | 528  | 1256 |
| LinJ03_V3.0490 | <i>L. infantum</i> | 271 | 1281 | 1551 |
| LinJ03_V3.0490 | <i>L. infantum</i> | 107 | 1575 | 1681 |
| LinJ03_V3.0490 | <i>L. infantum</i> | 117 | 1744 | 1860 |
| LinJ03_V3.0490 | <i>L. infantum</i> | 65  | 1893 | 1957 |
| LinJ03_V3.0490 | <i>L. infantum</i> | 48  | 1983 | 2030 |
| LinJ03_V3.0490 | <i>L. infantum</i> | 194 | 2117 | 2310 |
| LinJ03_V3.0490 | <i>L. infantum</i> | 49  | 2393 | 2441 |
| LinJ03_V3.0490 | <i>L. infantum</i> | 60  | 2541 | 2600 |
| LinJ03_V3.0500 | <i>L. infantum</i> | 357 | 1    | 357  |
| LinJ03_V3.0500 | <i>L. infantum</i> | 49  | 541  | 589  |
| LinJ03_V3.0500 | <i>L. infantum</i> | 51  | 661  | 711  |
| LinJ03_V3.0500 | <i>L. infantum</i> | 89  | 769  | 857  |
| LinJ03_V3.0510 | <i>L. infantum</i> | 182 | 1    | 182  |
| LinJ03_V3.0510 | <i>L. infantum</i> | 43  | 213  | 255  |
| LinJ03_V3.0510 | <i>L. infantum</i> | 70  | 257  | 326  |
| LinJ03_V3.0510 | <i>L. infantum</i> | 72  | 380  | 451  |
| LinJ03_V3.0510 | <i>L. infantum</i> | 69  | 551  | 619  |
| LinJ03_V3.0510 | <i>L. infantum</i> | 41  | 897  | 937  |
| LinJ03_V3.0510 | <i>L. infantum</i> | 90  | 1065 | 1154 |
| LinJ03_V3.0510 | <i>L. infantum</i> | 116 | 1203 | 1318 |
| LinJ03_V3.0510 | <i>L. infantum</i> | 71  | 1360 | 1430 |
| LinJ03_V3.0510 | <i>L. infantum</i> | 51  | 1480 | 1530 |
| LinJ03_V3.0510 | <i>L. infantum</i> | 97  | 1568 | 1664 |
| LinJ03_V3.0510 | <i>L. infantum</i> | 81  | 1755 | 1835 |

|                |                    |     |      |      |
|----------------|--------------------|-----|------|------|
| LinJ03_V3.0510 | <i>L. infantum</i> | 132 | 1892 | 2023 |
| LinJ03_V3.0520 | <i>L. infantum</i> | 49  | 1    | 49   |
| LinJ03_V3.0530 | <i>L. infantum</i> | 125 | 1    | 125  |
| LinJ03_V3.0530 | <i>L. infantum</i> | 58  | 271  | 328  |
| LinJ03_V3.0530 | <i>L. infantum</i> | 72  | 464  | 535  |
| LinJ03_V3.0530 | <i>L. infantum</i> | 56  | 570  | 625  |
| LinJ03_V3.0530 | <i>L. infantum</i> | 341 | 735  | 1075 |
| LinJ03_V3.0530 | <i>L. infantum</i> | 91  | 1278 | 1368 |
| LinJ03_V3.0540 | <i>L. infantum</i> | 87  | 1    | 87   |
| LinJ03_V3.0540 | <i>L. infantum</i> | 276 | 118  | 393  |
| LinJ03_V3.0540 | <i>L. infantum</i> | 69  | 470  | 538  |
| LinJ03_V3.0540 | <i>L. infantum</i> | 46  | 572  | 617  |
| LinJ03_V3.0560 | <i>L. infantum</i> | 99  | 80   | 178  |
| LinJ03_V3.0570 | <i>L. infantum</i> | 98  | 15   | 112  |
| LinJ03_V3.0570 | <i>L. infantum</i> | 230 | 128  | 357  |
| LinJ03_V3.0570 | <i>L. infantum</i> | 80  | 467  | 546  |
| LinJ03_V3.0570 | <i>L. infantum</i> | 73  | 721  | 793  |
| LinJ03_V3.0570 | <i>L. infantum</i> | 55  | 987  | 1041 |
| LinJ03_V3.0570 | <i>L. infantum</i> | 76  | 1105 | 1180 |
| LinJ03_V3.0580 | <i>L. infantum</i> | 58  | 1    | 58   |
| LinJ03_V3.0600 | <i>L. infantum</i> | 53  | 136  | 188  |
| LinJ03_V3.0600 | <i>L. infantum</i> | 44  | 551  | 594  |
| LinJ03_V3.0600 | <i>L. infantum</i> | 44  | 551  | 594  |
| LinJ03_V3.0610 | <i>L. infantum</i> | 82  | 67   | 148  |
| LinJ03_V3.0620 | <i>L. infantum</i> | 57  | 55   | 111  |
| LinJ03_V3.0620 | <i>L. infantum</i> | 55  | 214  | 268  |
| LinJ03_V3.0630 | <i>L. infantum</i> | 198 | 1    | 198  |
| LinJ03_V3.0630 | <i>L. infantum</i> | 65  | 223  | 287  |
| LinJ03_V3.0630 | <i>L. infantum</i> | 82  | 569  | 650  |
| LinJ03_V3.0630 | <i>L. infantum</i> | 80  | 810  | 889  |
| LinJ03_V3.0640 | <i>L. infantum</i> | 183 | 10   | 192  |
| LinJ03_V3.0640 | <i>L. infantum</i> | 145 | 440  | 584  |
| LinJ03_V3.0670 | <i>L. infantum</i> | 40  | 29   | 68   |
| LinJ03_V3.0670 | <i>L. infantum</i> | 60  | 282  | 341  |
| LinJ03_V3.0670 | <i>L. infantum</i> | 88  | 683  | 770  |
| LinJ03_V3.0670 | <i>L. infantum</i> | 52  | 1447 | 1498 |
| LinJ03_V3.0670 | <i>L. infantum</i> | 66  | 1551 | 1616 |
| LinJ03_V3.0680 | <i>L. infantum</i> | 232 | 68   | 299  |
| LinJ03_V3.0680 | <i>L. infantum</i> | 113 | 407  | 519  |
| LinJ03_V3.0680 | <i>L. infantum</i> | 43  | 534  | 576  |
| LinJ03_V3.0680 | <i>L. infantum</i> | 90  | 599  | 688  |
| LinJ03_V3.0680 | <i>L. infantum</i> | 77  | 698  | 774  |
| LinJ03_V3.0680 | <i>L. infantum</i> | 79  | 901  | 979  |
| LinJ03_V3.0680 | <i>L. infantum</i> | 68  | 991  | 1058 |
| LinJ03_V3.0680 | <i>L. infantum</i> | 62  | 1137 | 1198 |
| LinJ03_V3.0680 | <i>L. infantum</i> | 45  | 1350 | 1394 |
| LinJ03_V3.0680 | <i>L. infantum</i> | 67  | 1442 | 1508 |

|                |                    |      |      |      |
|----------------|--------------------|------|------|------|
| LinJ03_V3.0680 | <i>L. infantum</i> | 88   | 1724 | 1811 |
| LinJ03_V3.0680 | <i>L. infantum</i> | 60   | 1937 | 1996 |
| LinJ03_V3.0680 | <i>L. infantum</i> | 131  | 2154 | 2284 |
| LinJ03_V3.0680 | <i>L. infantum</i> | 48   | 2328 | 2375 |
| LinJ03_V3.0680 | <i>L. infantum</i> | 111  | 2399 | 2509 |
| LinJ03_V3.0680 | <i>L. infantum</i> | 69   | 2602 | 2670 |
| LinJ03_V3.0690 | <i>L. infantum</i> | 63   | 46   | 108  |
| LinJ03_V3.0700 | <i>L. infantum</i> | 168  | 27   | 194  |
| LinJ03_V3.0700 | <i>L. infantum</i> | 62   | 235  | 296  |
| LinJ03_V3.0700 | <i>L. infantum</i> | 53   | 310  | 362  |
| LinJ03_V3.0700 | <i>L. infantum</i> | 147  | 647  | 793  |
| LinJ03_V3.0700 | <i>L. infantum</i> | 89   | 1011 | 1099 |
| LinJ03_V3.0710 | <i>L. infantum</i> | 62   | 1    | 62   |
| LinJ03_V3.0710 | <i>L. infantum</i> | 71   | 135  | 205  |
| LinJ03_V3.0710 | <i>L. infantum</i> | 66   | 303  | 368  |
| LinJ03_V3.0730 | <i>L. infantum</i> | 79   | 1    | 79   |
| LinJ03_V3.0730 | <i>L. infantum</i> | 51   | 365  | 415  |
| LinJ03_V3.0730 | <i>L. infantum</i> | 208  | 509  | 716  |
| LinJ03_V3.0740 | <i>L. infantum</i> | 91   | 1    | 91   |
| LinJ03_V3.0740 | <i>L. infantum</i> | 49   | 150  | 198  |
| LinJ03_V3.0760 | <i>L. infantum</i> | 48   | 1    | 48   |
| LinJ03_V3.0760 | <i>L. infantum</i> | 140  | 115  | 254  |
| LinJ03_V3.0760 | <i>L. infantum</i> | 54   | 268  | 321  |
| LinJ03_V3.0760 | <i>L. infantum</i> | 57   | 323  | 379  |
| LinJ03_V3.0760 | <i>L. infantum</i> | 65   | 460  | 524  |
| LinJ03_V3.0760 | <i>L. infantum</i> | 1103 | 553  | 1655 |
| LinJ03_V3.0760 | <i>L. infantum</i> | 45   | 1669 | 1713 |
| LinJ03_V3.0760 | <i>L. infantum</i> | 310  | 1723 | 2032 |
| LinJ03_V3.0770 | <i>L. infantum</i> | 297  | 1    | 297  |
| LinJ03_V3.0770 | <i>L. infantum</i> | 283  | 410  | 692  |
| LinJ03_V3.0780 | <i>L. infantum</i> | 95   | 21   | 115  |
| LinJ03_V3.0780 | <i>L. infantum</i> | 172  | 219  | 390  |
| LinJ03_V3.0790 | <i>L. infantum</i> | 696  | 1    | 696  |
| LinJ03_V3.0790 | <i>L. infantum</i> | 113  | 698  | 810  |
| LinJ03_V3.0790 | <i>L. infantum</i> | 350  | 949  | 1298 |
| LinJ03_V3.0790 | <i>L. infantum</i> | 65   | 1300 | 1364 |
| LinJ03_V3.0790 | <i>L. infantum</i> | 132  | 1374 | 1505 |
| LinJ03_V3.0790 | <i>L. infantum</i> | 58   | 1519 | 1576 |
| LinJ03_V3.0790 | <i>L. infantum</i> | 117  | 1592 | 1708 |
| LinJ03_V3.0790 | <i>L. infantum</i> | 96   | 2016 | 2111 |
| LinJ03_V3.0790 | <i>L. infantum</i> | 46   | 2150 | 2195 |
| LinJ03_V3.0790 | <i>L. infantum</i> | 68   | 2326 | 2393 |
| LinJ03_V3.0800 | <i>L. infantum</i> | 329  | 1    | 329  |
| LinJ03_V3.0800 | <i>L. infantum</i> | 55   | 352  | 406  |
| LinJ03_V3.0800 | <i>L. infantum</i> | 123  | 567  | 689  |
| LinJ03_V3.0800 | <i>L. infantum</i> | 70   | 743  | 812  |
| LinJ03_V3.0800 | <i>L. infantum</i> | 48   | 898  | 945  |

|                |                    |     |      |      |
|----------------|--------------------|-----|------|------|
| LinJ03_V3.0810 | <i>L. infantum</i> | 624 | 1    | 624  |
| LinJ03_V3.0810 | <i>L. infantum</i> | 134 | 634  | 767  |
| LinJ03_V3.0810 | <i>L. infantum</i> | 890 | 790  | 1679 |
| LinJ03_V3.0810 | <i>L. infantum</i> | 100 | 1821 | 1920 |
| LinJ03_V3.0810 | <i>L. infantum</i> | 182 | 2006 | 2187 |
| LinJ03_V3.0810 | <i>L. infantum</i> | 259 | 2213 | 2471 |
| LinJ03_V3.0810 | <i>L. infantum</i> | 135 | 2473 | 2607 |
| LinJ03_V3.0810 | <i>L. infantum</i> | 290 | 2615 | 2904 |
| LinJ03_V3.0820 | <i>L. infantum</i> | 104 | 56   | 159  |
| LinJ03_V3.0830 | <i>L. infantum</i> | 101 | 1    | 101  |
| LinJ03_V3.0830 | <i>L. infantum</i> | 349 | 117  | 465  |
| LinJ03_V3.0830 | <i>L. infantum</i> | 187 | 467  | 653  |
| LinJ03_V3.0830 | <i>L. infantum</i> | 190 | 680  | 869  |
| LinJ03_V3.0830 | <i>L. infantum</i> | 158 | 881  | 1038 |
| LinJ03_V3.0830 | <i>L. infantum</i> | 74  | 1057 | 1130 |
| LinJ03_V3.0830 | <i>L. infantum</i> | 78  | 1189 | 1266 |
| LinJ03_V3.0830 | <i>L. infantum</i> | 90  | 1298 | 1387 |
| LinJ03_V3.0830 | <i>L. infantum</i> | 476 | 1399 | 1874 |
| LinJ03_V3.0830 | <i>L. infantum</i> | 55  | 1895 | 1949 |
| LinJ03_V3.0830 | <i>L. infantum</i> | 71  | 1983 | 2053 |
| LinJ03_V3.0830 | <i>L. infantum</i> | 298 | 2073 | 2370 |
| LinJ03_V3.0840 | <i>L. infantum</i> | 103 | 1    | 103  |
| LinJ03_V3.0840 | <i>L. infantum</i> | 139 | 132  | 270  |
| LinJ03_V3.0840 | <i>L. infantum</i> | 101 | 306  | 406  |
| LinJ03_V3.0840 | <i>L. infantum</i> | 56  | 470  | 525  |
| LinJ03_V3.0840 | <i>L. infantum</i> | 49  | 759  | 807  |
| LinJ03_V3.0840 | <i>L. infantum</i> | 87  | 809  | 895  |
| LinJ03_V3.0840 | <i>L. infantum</i> | 43  | 939  | 981  |
| LinJ03_V3.0840 | <i>L. infantum</i> | 113 | 1116 | 1228 |
| LinJ03_V3.0850 | <i>L. infantum</i> | 110 | 1    | 110  |
| LinJ03_V3.0850 | <i>L. infantum</i> | 555 | 364  | 918  |
| LinJ03_V3.0850 | <i>L. infantum</i> | 42  | 920  | 961  |
| LinJ03_V3.0860 | <i>L. infantum</i> | 124 | 76   | 199  |
| LinJ03_V3.0860 | <i>L. infantum</i> | 92  | 323  | 414  |
| LinJ03_V3.0860 | <i>L. infantum</i> | 104 | 689  | 792  |
| LinJ03_V3.0860 | <i>L. infantum</i> | 95  | 866  | 960  |
| LinJ03_V3.0860 | <i>L. infantum</i> | 97  | 1365 | 1461 |
| LinJ03_V3.0860 | <i>L. infantum</i> | 45  | 1876 | 1920 |
| LinJ03_V3.0870 | <i>L. infantum</i> | 83  | 61   | 143  |
| LinJ03_V3.0870 | <i>L. infantum</i> | 104 | 180  | 283  |
| LinJ03_V3.0870 | <i>L. infantum</i> | 121 | 413  | 533  |
| LinJ03_V3.0870 | <i>L. infantum</i> | 112 | 600  | 711  |
| LinJ03_V3.0880 | <i>L. infantum</i> | 87  | 294  | 380  |
| LinJ03_V3.0920 | <i>L. infantum</i> | 135 | 10   | 144  |
| LinJ03_V3.0960 | <i>L. infantum</i> | 60  | 354  | 413  |
| LinJ03_V3.0970 | <i>L. infantum</i> | 80  | 481  | 560  |
| LinJ04_V3.0030 | <i>L. infantum</i> | 76  | 35   | 110  |



|                |                    |     |      |      |
|----------------|--------------------|-----|------|------|
| LinJ04_V3.0030 | <i>L. infantum</i> | 87  | 471  | 557  |
| LinJ04_V3.0030 | <i>L. infantum</i> | 60  | 665  | 724  |
| LinJ04_V3.0040 | <i>L. infantum</i> | 90  | 44   | 133  |
| LinJ04_V3.0060 | <i>L. infantum</i> | 200 | 1    | 200  |
| LinJ04_V3.0060 | <i>L. infantum</i> | 149 | 227  | 375  |
| LinJ04_V3.0060 | <i>L. infantum</i> | 121 | 409  | 529  |
| LinJ04_V3.0070 | <i>L. infantum</i> | 40  | 1    | 40   |
| LinJ04_V3.0070 | <i>L. infantum</i> | 145 | 57   | 201  |
| LinJ04_V3.0090 | <i>L. infantum</i> | 141 | 18   | 158  |
| LinJ04_V3.0100 | <i>L. infantum</i> | 58  | 1335 | 1392 |
| LinJ04_V3.0110 | <i>L. infantum</i> | 45  | 57   | 101  |
| LinJ04_V3.0110 | <i>L. infantum</i> | 114 | 207  | 320  |
| LinJ04_V3.0110 | <i>L. infantum</i> | 104 | 474  | 577  |
| LinJ04_V3.0120 | <i>L. infantum</i> | 62  | 83   | 144  |
| LinJ04_V3.0120 | <i>L. infantum</i> | 115 | 233  | 347  |
| LinJ04_V3.0140 | <i>L. infantum</i> | 137 | 22   | 158  |
| LinJ04_V3.0150 | <i>L. infantum</i> | 82  | 1    | 82   |
| LinJ04_V3.0150 | <i>L. infantum</i> | 152 | 122  | 273  |
| LinJ04_V3.0150 | <i>L. infantum</i> | 55  | 330  | 384  |
| LinJ04_V3.0160 | <i>L. infantum</i> | 52  | 49   | 100  |
| LinJ04_V3.0160 | <i>L. infantum</i> | 60  | 359  | 418  |
| LinJ04_V3.0160 | <i>L. infantum</i> | 58  | 437  | 494  |
| LinJ04_V3.0170 | <i>L. infantum</i> | 71  | 159  | 229  |
| LinJ04_V3.0170 | <i>L. infantum</i> | 70  | 352  | 421  |
| LinJ04_V3.0170 | <i>L. infantum</i> | 70  | 352  | 421  |
| LinJ04_V3.0180 | <i>L. infantum</i> | 107 | 385  | 491  |
| LinJ04_V3.0180 | <i>L. infantum</i> | 70  | 557  | 626  |
| LinJ04_V3.0180 | <i>L. infantum</i> | 70  | 557  | 626  |
| LinJ04_V3.0190 | <i>L. infantum</i> | 107 | 1    | 107  |
| LinJ04_V3.0200 | <i>L. infantum</i> | 136 | 114  | 249  |
| LinJ04_V3.0210 | <i>L. infantum</i> | 62  | 293  | 354  |
| LinJ04_V3.0220 | <i>L. infantum</i> | 76  | 104  | 179  |
| LinJ04_V3.0220 | <i>L. infantum</i> | 74  | 185  | 258  |
| LinJ04_V3.0230 | <i>L. infantum</i> | 99  | 1    | 99   |
| LinJ04_V3.0240 | <i>L. infantum</i> | 99  | 1    | 99   |
| LinJ04_V3.0240 | <i>L. infantum</i> | 139 | 362  | 500  |
| LinJ04_V3.0240 | <i>L. infantum</i> | 58  | 658  | 715  |
| LinJ04_V3.0240 | <i>L. infantum</i> | 58  | 794  | 851  |
| LinJ04_V3.0240 | <i>L. infantum</i> | 44  | 894  | 937  |
| LinJ04_V3.0240 | <i>L. infantum</i> | 71  | 1017 | 1087 |
| LinJ04_V3.0240 | <i>L. infantum</i> | 109 | 1212 | 1320 |
| LinJ04_V3.0250 | <i>L. infantum</i> | 42  | 1    | 42   |
| LinJ04_V3.0250 | <i>L. infantum</i> | 71  | 65   | 135  |
| LinJ04_V3.0250 | <i>L. infantum</i> | 46  | 223  | 268  |
| LinJ04_V3.0260 | <i>L. infantum</i> | 91  | 65   | 155  |
| LinJ04_V3.0260 | <i>L. infantum</i> | 53  | 235  | 287  |
| LinJ04_V3.0260 | <i>L. infantum</i> | 53  | 235  | 287  |

|                |                    |     |      |      |
|----------------|--------------------|-----|------|------|
| LinJ04_V3.0270 | <i>L. infantum</i> | 72  | 70   | 141  |
| LinJ04_V3.0270 | <i>L. infantum</i> | 45  | 444  | 488  |
| LinJ04_V3.0270 | <i>L. infantum</i> | 79  | 799  | 877  |
| LinJ04_V3.0270 | <i>L. infantum</i> | 81  | 926  | 1006 |
| LinJ04_V3.0270 | <i>L. infantum</i> | 44  | 1171 | 1214 |
| LinJ04_V3.0270 | <i>L. infantum</i> | 243 | 1611 | 1853 |
| LinJ04_V3.0320 | <i>L. infantum</i> | 59  | 1    | 59   |
| LinJ04_V3.0320 | <i>L. infantum</i> | 59  | 370  | 428  |
| LinJ04_V3.0320 | <i>L. infantum</i> | 44  | 432  | 475  |
| LinJ04_V3.0340 | <i>L. infantum</i> | 64  | 1    | 64   |
| LinJ04_V3.0340 | <i>L. infantum</i> | 234 | 74   | 307  |
| LinJ04_V3.0340 | <i>L. infantum</i> | 414 | 386  | 799  |
| LinJ04_V3.0340 | <i>L. infantum</i> | 131 | 805  | 935  |
| LinJ04_V3.0340 | <i>L. infantum</i> | 97  | 990  | 1086 |
| LinJ04_V3.0340 | <i>L. infantum</i> | 203 | 1184 | 1386 |
| LinJ04_V3.0340 | <i>L. infantum</i> | 52  | 1471 | 1522 |
| LinJ04_V3.0340 | <i>L. infantum</i> | 108 | 1587 | 1694 |
| LinJ04_V3.0340 | <i>L. infantum</i> | 46  | 1763 | 1808 |
| LinJ04_V3.0340 | <i>L. infantum</i> | 51  | 1910 | 1960 |
| LinJ04_V3.0340 | <i>L. infantum</i> | 50  | 2016 | 2065 |
| LinJ04_V3.0350 | <i>L. infantum</i> | 106 | 85   | 190  |
| LinJ04_V3.0370 | <i>L. infantum</i> | 55  | 188  | 242  |
| LinJ04_V3.0380 | <i>L. infantum</i> | 50  | 1    | 50   |
| LinJ04_V3.0380 | <i>L. infantum</i> | 90  | 176  | 265  |
| LinJ04_V3.0390 | <i>L. infantum</i> | 483 | 1    | 483  |
| LinJ04_V3.0390 | <i>L. infantum</i> | 369 | 522  | 890  |
| LinJ04_V3.0390 | <i>L. infantum</i> | 77  | 894  | 970  |
| LinJ04_V3.0390 | <i>L. infantum</i> | 115 | 985  | 1099 |
| LinJ04_V3.0400 | <i>L. infantum</i> | 69  | 293  | 361  |
| LinJ04_V3.0410 | <i>L. infantum</i> | 59  | 197  | 255  |
| LinJ04_V3.0410 | <i>L. infantum</i> | 63  | 301  | 363  |
| LinJ04_V3.0410 | <i>L. infantum</i> | 40  | 524  | 563  |
| LinJ04_V3.0410 | <i>L. infantum</i> | 82  | 565  | 646  |
| LinJ04_V3.0410 | <i>L. infantum</i> | 46  | 799  | 844  |
| LinJ04_V3.0410 | <i>L. infantum</i> | 63  | 1067 | 1129 |
| LinJ04_V3.0410 | <i>L. infantum</i> | 62  | 1275 | 1336 |
| LinJ04_V3.0410 | <i>L. infantum</i> | 75  | 2902 | 2976 |
| LinJ04_V3.0410 | <i>L. infantum</i> | 43  | 3022 | 3064 |
| LinJ04_V3.0410 | <i>L. infantum</i> | 63  | 3757 | 3819 |
| LinJ04_V3.0420 | <i>L. infantum</i> | 70  | 1    | 70   |
| LinJ04_V3.0420 | <i>L. infantum</i> | 571 | 86   | 656  |
| LinJ04_V3.0420 | <i>L. infantum</i> | 48  | 696  | 743  |
| LinJ04_V3.0420 | <i>L. infantum</i> | 54  | 779  | 832  |
| LinJ04_V3.0420 | <i>L. infantum</i> | 57  | 979  | 1035 |
| LinJ04_V3.0430 | <i>L. infantum</i> | 144 | 1    | 144  |
| LinJ04_V3.0440 | <i>L. infantum</i> | 44  | 1    | 44   |
| LinJ04_V3.0450 | <i>L. infantum</i> | 43  | 125  | 167  |

|                |                    |     |      |      |
|----------------|--------------------|-----|------|------|
| LinJ04_V3.0450 | <i>L. infantum</i> | 172 | 242  | 413  |
| LinJ04_V3.0450 | <i>L. infantum</i> | 65  | 792  | 856  |
| LinJ04_V3.0450 | <i>L. infantum</i> | 98  | 880  | 977  |
| LinJ04_V3.0460 | <i>L. infantum</i> | 50  | 139  | 188  |
| LinJ04_V3.0480 | <i>L. infantum</i> | 234 | 90   | 323  |
| LinJ04_V3.0490 | <i>L. infantum</i> | 573 | 1    | 573  |
| LinJ04_V3.0490 | <i>L. infantum</i> | 464 | 577  | 1040 |
| LinJ04_V3.0490 | <i>L. infantum</i> | 260 | 1125 | 1384 |
| LinJ04_V3.0490 | <i>L. infantum</i> | 200 | 1424 | 1623 |
| LinJ04_V3.0490 | <i>L. infantum</i> | 56  | 1747 | 1802 |
| LinJ04_V3.0490 | <i>L. infantum</i> | 48  | 1823 | 1870 |
| LinJ04_V3.0490 | <i>L. infantum</i> | 275 | 1908 | 2182 |
| LinJ04_V3.0490 | <i>L. infantum</i> | 516 | 2308 | 2823 |
| LinJ04_V3.0490 | <i>L. infantum</i> | 168 | 2835 | 3002 |
| LinJ04_V3.0500 | <i>L. infantum</i> | 103 | 1    | 103  |
| LinJ04_V3.0500 | <i>L. infantum</i> | 99  | 110  | 208  |
| LinJ04_V3.0500 | <i>L. infantum</i> | 284 | 212  | 495  |
| LinJ04_V3.0500 | <i>L. infantum</i> | 217 | 597  | 813  |
| LinJ04_V3.0500 | <i>L. infantum</i> | 116 | 873  | 988  |
| LinJ04_V3.0500 | <i>L. infantum</i> | 180 | 1152 | 1331 |
| LinJ04_V3.0510 | <i>L. infantum</i> | 62  | 92   | 153  |
| LinJ04_V3.0510 | <i>L. infantum</i> | 85  | 286  | 370  |
| LinJ04_V3.0510 | <i>L. infantum</i> | 117 | 887  | 1003 |
| LinJ04_V3.0520 | <i>L. infantum</i> | 97  | 1    | 97   |
| LinJ04_V3.0520 | <i>L. infantum</i> | 112 | 154  | 265  |
| LinJ04_V3.0520 | <i>L. infantum</i> | 77  | 271  | 347  |
| LinJ04_V3.0530 | <i>L. infantum</i> | 140 | 116  | 255  |
| LinJ04_V3.0530 | <i>L. infantum</i> | 182 | 411  | 592  |
| LinJ04_V3.0540 | <i>L. infantum</i> | 71  | 1274 | 1344 |
| LinJ04_V3.0550 | <i>L. infantum</i> | 112 | 198  | 309  |
| LinJ04_V3.0560 | <i>L. infantum</i> | 59  | 32   | 90   |
| LinJ04_V3.0560 | <i>L. infantum</i> | 47  | 499  | 545  |
| LinJ04_V3.0560 | <i>L. infantum</i> | 40  | 591  | 630  |
| LinJ04_V3.0560 | <i>L. infantum</i> | 44  | 685  | 728  |
| LinJ04_V3.0560 | <i>L. infantum</i> | 81  | 731  | 811  |
| LinJ04_V3.0560 | <i>L. infantum</i> | 63  | 1011 | 1073 |
| LinJ04_V3.0560 | <i>L. infantum</i> | 186 | 1327 | 1512 |
| LinJ04_V3.0560 | <i>L. infantum</i> | 52  | 1517 | 1568 |
| LinJ04_V3.0580 | <i>L. infantum</i> | 58  | 116  | 173  |
| LinJ04_V3.0590 | <i>L. infantum</i> | 238 | 239  | 476  |
| LinJ04_V3.0590 | <i>L. infantum</i> | 67  | 591  | 657  |
| LinJ04_V3.0590 | <i>L. infantum</i> | 58  | 833  | 890  |
| LinJ04_V3.0590 | <i>L. infantum</i> | 188 | 913  | 1100 |
| LinJ04_V3.0590 | <i>L. infantum</i> | 138 | 1275 | 1412 |
| LinJ04_V3.0590 | <i>L. infantum</i> | 75  | 1497 | 1571 |
| LinJ04_V3.0590 | <i>L. infantum</i> | 136 | 1637 | 1772 |
| LinJ04_V3.0590 | <i>L. infantum</i> | 61  | 1829 | 1889 |

|                |                    |     |      |      |
|----------------|--------------------|-----|------|------|
| LinJ04_V3.0590 | <i>L. infantum</i> | 48  | 1905 | 1952 |
| LinJ04_V3.0590 | <i>L. infantum</i> | 285 | 2004 | 2288 |
| LinJ04_V3.0590 | <i>L. infantum</i> | 75  | 2300 | 2374 |
| LinJ04_V3.0590 | <i>L. infantum</i> | 180 | 2427 | 2606 |
| LinJ04_V3.0590 | <i>L. infantum</i> | 65  | 2666 | 2730 |
| LinJ04_V3.0590 | <i>L. infantum</i> | 313 | 2745 | 3057 |
| LinJ04_V3.0600 | <i>L. infantum</i> | 167 | 1    | 167  |
| LinJ04_V3.0610 | <i>L. infantum</i> | 41  | 1    | 41   |
| LinJ04_V3.0610 | <i>L. infantum</i> | 379 | 103  | 481  |
| LinJ04_V3.0610 | <i>L. infantum</i> | 775 | 515  | 1289 |
| LinJ04_V3.0620 | <i>L. infantum</i> | 144 | 195  | 338  |
| LinJ04_V3.0650 | <i>L. infantum</i> | 60  | 1    | 60   |
| LinJ04_V3.0650 | <i>L. infantum</i> | 45  | 139  | 183  |
| LinJ04_V3.0650 | <i>L. infantum</i> | 69  | 219  | 287  |
| LinJ04_V3.0650 | <i>L. infantum</i> | 81  | 617  | 697  |
| LinJ04_V3.0650 | <i>L. infantum</i> | 49  | 744  | 792  |
| LinJ04_V3.0650 | <i>L. infantum</i> | 135 | 1024 | 1158 |
| LinJ04_V3.0660 | <i>L. infantum</i> | 41  | 1    | 41   |
| LinJ04_V3.0670 | <i>L. infantum</i> | 53  | 1    | 53   |
| LinJ04_V3.0690 | <i>L. infantum</i> | 85  | 1    | 85   |
| LinJ04_V3.0690 | <i>L. infantum</i> | 124 | 118  | 241  |
| LinJ04_V3.0690 | <i>L. infantum</i> | 48  | 300  | 347  |
| LinJ04_V3.0690 | <i>L. infantum</i> | 44  | 492  | 535  |
| LinJ04_V3.0690 | <i>L. infantum</i> | 94  | 629  | 722  |
| LinJ04_V3.0710 | <i>L. infantum</i> | 263 | 72   | 334  |
| LinJ04_V3.0710 | <i>L. infantum</i> | 117 | 350  | 466  |
| LinJ04_V3.0710 | <i>L. infantum</i> | 93  | 595  | 687  |
| LinJ04_V3.0720 | <i>L. infantum</i> | 125 | 1    | 125  |
| LinJ04_V3.0720 | <i>L. infantum</i> | 501 | 144  | 644  |
| LinJ04_V3.0730 | <i>L. infantum</i> | 46  | 1    | 46   |
| LinJ04_V3.0730 | <i>L. infantum</i> | 46  | 74   | 119  |
| LinJ04_V3.0730 | <i>L. infantum</i> | 61  | 420  | 480  |
| LinJ04_V3.0740 | <i>L. infantum</i> | 233 | 115  | 347  |
| LinJ04_V3.0740 | <i>L. infantum</i> | 374 | 437  | 810  |
| LinJ04_V3.0760 | <i>L. infantum</i> | 69  | 74   | 142  |
| LinJ04_V3.0760 | <i>L. infantum</i> | 68  | 184  | 251  |
| LinJ04_V3.0760 | <i>L. infantum</i> | 68  | 184  | 251  |
| LinJ04_V3.0770 | <i>L. infantum</i> | 48  | 1    | 48   |
| LinJ04_V3.0770 | <i>L. infantum</i> | 68  | 90   | 157  |
| LinJ04_V3.0770 | <i>L. infantum</i> | 68  | 90   | 157  |
| LinJ04_V3.0780 | <i>L. infantum</i> | 49  | 230  | 278  |
| LinJ04_V3.0780 | <i>L. infantum</i> | 40  | 375  | 414  |
| LinJ04_V3.0780 | <i>L. infantum</i> | 81  | 496  | 576  |
| LinJ04_V3.0790 | <i>L. infantum</i> | 77  | 344  | 420  |
| LinJ04_V3.0790 | <i>L. infantum</i> | 693 | 425  | 1117 |
| LinJ04_V3.0800 | <i>L. infantum</i> | 142 | 27   | 168  |
| LinJ04_V3.0800 | <i>L. infantum</i> | 90  | 202  | 291  |

|                |                    |     |      |      |
|----------------|--------------------|-----|------|------|
| LinJ04_V3.0810 | <i>L. infantum</i> | 61  | 22   | 82   |
| LinJ04_V3.0810 | <i>L. infantum</i> | 212 | 227  | 438  |
| LinJ04_V3.0820 | <i>L. infantum</i> | 43  | 59   | 101  |
| LinJ04_V3.0820 | <i>L. infantum</i> | 55  | 339  | 393  |
| LinJ04_V3.0820 | <i>L. infantum</i> | 55  | 339  | 393  |
| LinJ04_V3.0830 | <i>L. infantum</i> | 625 | 1    | 625  |
| LinJ04_V3.0830 | <i>L. infantum</i> | 208 | 661  | 868  |
| LinJ04_V3.0830 | <i>L. infantum</i> | 410 | 880  | 1289 |
| LinJ04_V3.0830 | <i>L. infantum</i> | 97  | 1291 | 1387 |
| LinJ04_V3.0840 | <i>L. infantum</i> | 193 | 1    | 193  |
| LinJ04_V3.0840 | <i>L. infantum</i> | 83  | 382  | 464  |
| LinJ04_V3.0840 | <i>L. infantum</i> | 206 | 487  | 692  |
| LinJ04_V3.0850 | <i>L. infantum</i> | 92  | 1    | 92   |
| LinJ04_V3.0850 | <i>L. infantum</i> | 58  | 128  | 185  |
| LinJ04_V3.0860 | <i>L. infantum</i> | 65  | 202  | 266  |
| LinJ04_V3.0870 | <i>L. infantum</i> | 454 | 1    | 454  |
| LinJ04_V3.0870 | <i>L. infantum</i> | 717 | 468  | 1184 |
| LinJ04_V3.0880 | <i>L. infantum</i> | 174 | 1    | 174  |
| LinJ04_V3.0890 | <i>L. infantum</i> | 105 | 1    | 105  |
| LinJ04_V3.0890 | <i>L. infantum</i> | 80  | 244  | 323  |
| LinJ04_V3.0890 | <i>L. infantum</i> | 490 | 476  | 965  |
| LinJ04_V3.0890 | <i>L. infantum</i> | 305 | 970  | 1274 |
| LinJ04_V3.0900 | <i>L. infantum</i> | 966 | 1    | 966  |
| LinJ04_V3.0900 | <i>L. infantum</i> | 59  | 1017 | 1075 |
| LinJ04_V3.0900 | <i>L. infantum</i> | 88  | 1336 | 1423 |
| LinJ04_V3.0900 | <i>L. infantum</i> | 84  | 1623 | 1706 |
| LinJ04_V3.0900 | <i>L. infantum</i> | 49  | 1824 | 1872 |
| LinJ04_V3.0910 | <i>L. infantum</i> | 130 | 65   | 194  |
| LinJ04_V3.0920 | <i>L. infantum</i> | 85  | 1    | 85   |
| LinJ04_V3.0920 | <i>L. infantum</i> | 150 | 141  | 290  |
| LinJ04_V3.0920 | <i>L. infantum</i> | 72  | 305  | 376  |
| LinJ04_V3.0940 | <i>L. infantum</i> | 93  | 1    | 93   |
| LinJ04_V3.0940 | <i>L. infantum</i> | 132 | 105  | 236  |
| LinJ04_V3.0940 | <i>L. infantum</i> | 91  | 271  | 361  |
| LinJ04_V3.0970 | <i>L. infantum</i> | 303 | 1    | 303  |
| LinJ04_V3.0970 | <i>L. infantum</i> | 49  | 440  | 488  |
| LinJ04_V3.0980 | <i>L. infantum</i> | 83  | 30   | 112  |
| LinJ04_V3.0980 | <i>L. infantum</i> | 91  | 167  | 257  |
| LinJ04_V3.0980 | <i>L. infantum</i> | 167 | 262  | 428  |
| LinJ04_V3.0990 | <i>L. infantum</i> | 90  | 1    | 90   |
| LinJ04_V3.0990 | <i>L. infantum</i> | 162 | 94   | 255  |
| LinJ04_V3.0990 | <i>L. infantum</i> | 53  | 291  | 343  |
| LinJ04_V3.0990 | <i>L. infantum</i> | 55  | 447  | 501  |
| LinJ04_V3.0990 | <i>L. infantum</i> | 105 | 747  | 851  |
| LinJ04_V3.0990 | <i>L. infantum</i> | 57  | 996  | 1052 |
| LinJ04_V3.0990 | <i>L. infantum</i> | 54  | 1121 | 1174 |
| LinJ04_V3.1000 | <i>L. infantum</i> | 111 | 67   | 177  |

|                |                    |     |      |      |
|----------------|--------------------|-----|------|------|
| LinJ04_V3.1000 | <i>L. infantum</i> | 60  | 226  | 285  |
| LinJ04_V3.1010 | <i>L. infantum</i> | 47  | 73   | 119  |
| LinJ04_V3.1010 | <i>L. infantum</i> | 70  | 708  | 777  |
| LinJ04_V3.1010 | <i>L. infantum</i> | 223 | 956  | 1178 |
| LinJ04_V3.1020 | <i>L. infantum</i> | 222 | 1    | 222  |
| LinJ04_V3.1030 | <i>L. infantum</i> | 55  | 140  | 194  |
| LinJ04_V3.1050 | <i>L. infantum</i> | 54  | 303  | 356  |
| LinJ04_V3.1060 | <i>L. infantum</i> | 93  | 54   | 146  |
| LinJ04_V3.1060 | <i>L. infantum</i> | 278 | 208  | 485  |
| LinJ04_V3.1070 | <i>L. infantum</i> | 56  | 1    | 56   |
| LinJ04_V3.1080 | <i>L. infantum</i> | 231 | 1    | 231  |
| LinJ04_V3.1080 | <i>L. infantum</i> | 41  | 694  | 734  |
| LinJ04_V3.1080 | <i>L. infantum</i> | 64  | 813  | 876  |
| LinJ04_V3.1090 | <i>L. infantum</i> | 76  | 1    | 76   |
| LinJ04_V3.1100 | <i>L. infantum</i> | 183 | 1    | 183  |
| LinJ04_V3.1100 | <i>L. infantum</i> | 697 | 191  | 887  |
| LinJ04_V3.1100 | <i>L. infantum</i> | 100 | 939  | 1038 |
| LinJ04_V3.1100 | <i>L. infantum</i> | 203 | 1105 | 1307 |
| LinJ04_V3.1120 | <i>L. infantum</i> | 51  | 893  | 943  |
| LinJ04_V3.1130 | <i>L. infantum</i> | 157 | 58   | 214  |
| LinJ04_V3.1130 | <i>L. infantum</i> | 72  | 229  | 300  |
| LinJ04_V3.1130 | <i>L. infantum</i> | 340 | 343  | 682  |
| LinJ04_V3.1150 | <i>L. infantum</i> | 300 | 1    | 300  |
| LinJ04_V3.1160 | <i>L. infantum</i> | 47  | 122  | 168  |
| LinJ04_V3.1180 | <i>L. infantum</i> | 165 | 1    | 165  |
| LinJ04_V3.1180 | <i>L. infantum</i> | 48  | 277  | 324  |
| LinJ04_V3.1180 | <i>L. infantum</i> | 74  | 344  | 417  |
| LinJ04_V3.1190 | <i>L. infantum</i> | 90  | 1    | 90   |
| LinJ04_V3.1190 | <i>L. infantum</i> | 46  | 266  | 311  |
| LinJ04_V3.1200 | <i>L. infantum</i> | 54  | 1086 | 1139 |
| LinJ04_V3.1200 | <i>L. infantum</i> | 329 | 1250 | 1578 |
| LinJ04_V3.1200 | <i>L. infantum</i> | 204 | 1617 | 1820 |
| LinJ04_V3.1200 | <i>L. infantum</i> | 515 | 1880 | 2394 |
| LinJ04_V3.1230 | <i>L. infantum</i> | 61  | 308  | 368  |
| LinJ04_V3.1240 | <i>L. infantum</i> | 50  | 1    | 50   |
| LinJ04_V3.1240 | <i>L. infantum</i> | 377 | 107  | 483  |
| LinJ04_V3.1240 | <i>L. infantum</i> | 83  | 951  | 1033 |
| LinJ05_V3.0010 | <i>L. infantum</i> | 78  | 1    | 78   |
| LinJ05_V3.0010 | <i>L. infantum</i> | 109 | 80   | 188  |
| LinJ05_V3.0010 | <i>L. infantum</i> | 248 | 226  | 473  |
| LinJ05_V3.0010 | <i>L. infantum</i> | 86  | 526  | 611  |
| LinJ05_V3.0010 | <i>L. infantum</i> | 147 | 689  | 835  |
| LinJ05_V3.0020 | <i>L. infantum</i> | 42  | 18   | 59   |
| LinJ05_V3.0040 | <i>L. infantum</i> | 368 | 1    | 368  |
| LinJ05_V3.0040 | <i>L. infantum</i> | 94  | 380  | 473  |
| LinJ05_V3.0040 | <i>L. infantum</i> | 48  | 534  | 581  |
| LinJ05_V3.0050 | <i>L. infantum</i> | 107 | 45   | 151  |

|                |                    |     |      |      |
|----------------|--------------------|-----|------|------|
| LinJ05_V3.0050 | <i>L. infantum</i> | 83  | 183  | 265  |
| LinJ05_V3.0050 | <i>L. infantum</i> | 70  | 364  | 433  |
| LinJ05_V3.0050 | <i>L. infantum</i> | 79  | 755  | 833  |
| LinJ05_V3.0060 | <i>L. infantum</i> | 41  | 69   | 109  |
| LinJ05_V3.0060 | <i>L. infantum</i> | 157 | 618  | 774  |
| LinJ05_V3.0060 | <i>L. infantum</i> | 157 | 618  | 774  |
| LinJ05_V3.0080 | <i>L. infantum</i> | 115 | 1    | 115  |
| LinJ05_V3.0080 | <i>L. infantum</i> | 43  | 159  | 201  |
| LinJ05_V3.0080 | <i>L. infantum</i> | 43  | 159  | 201  |
| LinJ05_V3.0100 | <i>L. infantum</i> | 53  | 226  | 278  |
| LinJ05_V3.0130 | <i>L. infantum</i> | 78  | 355  | 432  |
| LinJ05_V3.0140 | <i>L. infantum</i> | 88  | 1    | 88   |
| LinJ05_V3.0140 | <i>L. infantum</i> | 63  | 616  | 678  |
| LinJ05_V3.0160 | <i>L. infantum</i> | 230 | 11   | 240  |
| LinJ05_V3.0160 | <i>L. infantum</i> | 230 | 284  | 513  |
| LinJ05_V3.0170 | <i>L. infantum</i> | 222 | 1    | 222  |
| LinJ05_V3.0170 | <i>L. infantum</i> | 529 | 231  | 759  |
| LinJ05_V3.0180 | <i>L. infantum</i> | 55  | 121  | 175  |
| LinJ05_V3.0180 | <i>L. infantum</i> | 74  | 189  | 262  |
| LinJ05_V3.0180 | <i>L. infantum</i> | 74  | 189  | 262  |
| LinJ05_V3.0190 | <i>L. infantum</i> | 44  | 1    | 44   |
| LinJ05_V3.0190 | <i>L. infantum</i> | 90  | 117  | 206  |
| LinJ05_V3.0190 | <i>L. infantum</i> | 145 | 217  | 361  |
| LinJ05_V3.0200 | <i>L. infantum</i> | 50  | 1    | 50   |
| LinJ05_V3.0200 | <i>L. infantum</i> | 125 | 255  | 379  |
| LinJ05_V3.0200 | <i>L. infantum</i> | 43  | 583  | 625  |
| LinJ05_V3.0210 | <i>L. infantum</i> | 45  | 1    | 45   |
| LinJ05_V3.0210 | <i>L. infantum</i> | 57  | 59   | 115  |
| LinJ05_V3.0210 | <i>L. infantum</i> | 54  | 166  | 219  |
| LinJ05_V3.0210 | <i>L. infantum</i> | 41  | 406  | 446  |
| LinJ05_V3.0210 | <i>L. infantum</i> | 50  | 620  | 669  |
| LinJ05_V3.0210 | <i>L. infantum</i> | 67  | 1057 | 1123 |
| LinJ05_V3.0210 | <i>L. infantum</i> | 171 | 1304 | 1474 |
| LinJ05_V3.0220 | <i>L. infantum</i> | 46  | 1    | 46   |
| LinJ05_V3.0220 | <i>L. infantum</i> | 464 | 208  | 671  |
| LinJ05_V3.0230 | <i>L. infantum</i> | 44  | 88   | 131  |
| LinJ05_V3.0230 | <i>L. infantum</i> | 46  | 157  | 202  |
| LinJ05_V3.0230 | <i>L. infantum</i> | 77  | 366  | 442  |
| LinJ05_V3.0230 | <i>L. infantum</i> | 53  | 529  | 581  |
| LinJ05_V3.0240 | <i>L. infantum</i> | 149 | 217  | 365  |
| LinJ05_V3.0240 | <i>L. infantum</i> | 482 | 373  | 854  |
| LinJ05_V3.0260 | <i>L. infantum</i> | 45  | 100  | 144  |
| LinJ05_V3.0260 | <i>L. infantum</i> | 110 | 277  | 386  |
| LinJ05_V3.0270 | <i>L. infantum</i> | 195 | 1    | 195  |
| LinJ05_V3.0270 | <i>L. infantum</i> | 108 | 292  | 399  |
| LinJ05_V3.0270 | <i>L. infantum</i> | 108 | 292  | 399  |
| LinJ05_V3.0290 | <i>L. infantum</i> | 92  | 1    | 92   |

|                |                    |      |     |      |
|----------------|--------------------|------|-----|------|
| LinJ05_V3.0300 | <i>L. infantum</i> | 51   | 1   | 51   |
| LinJ05_V3.0310 | <i>L. infantum</i> | 193  | 1   | 193  |
| LinJ05_V3.0310 | <i>L. infantum</i> | 88   | 376 | 463  |
| LinJ05_V3.0310 | <i>L. infantum</i> | 48   | 501 | 548  |
| LinJ05_V3.0310 | <i>L. infantum</i> | 50   | 554 | 603  |
| LinJ05_V3.0310 | <i>L. infantum</i> | 45   | 696 | 740  |
| LinJ05_V3.0320 | <i>L. infantum</i> | 79   | 1   | 79   |
| LinJ05_V3.0330 | <i>L. infantum</i> | 52   | 308 | 359  |
| LinJ05_V3.0330 | <i>L. infantum</i> | 67   | 389 | 455  |
| LinJ05_V3.0330 | <i>L. infantum</i> | 52   | 462 | 513  |
| LinJ05_V3.0330 | <i>L. infantum</i> | 40   | 819 | 858  |
| LinJ05_V3.0340 | <i>L. infantum</i> | 44   | 1   | 44   |
| LinJ05_V3.0340 | <i>L. infantum</i> | 60   | 52  | 111  |
| LinJ05_V3.0340 | <i>L. infantum</i> | 49   | 140 | 188  |
| LinJ05_V3.0360 | <i>L. infantum</i> | 63   | 183 | 245  |
| LinJ05_V3.0360 | <i>L. infantum</i> | 148  | 478 | 625  |
| LinJ05_V3.0370 | <i>L. infantum</i> | 47   | 81  | 127  |
| LinJ05_V3.0370 | <i>L. infantum</i> | 167  | 162 | 328  |
| LinJ05_V3.0380 | <i>L. infantum</i> | 1463 | 4   | 1466 |
| LinJ05_V3.0390 | <i>L. infantum</i> | 159  | 1   | 159  |
| LinJ05_V3.0390 | <i>L. infantum</i> | 115  | 379 | 493  |
| LinJ05_V3.0400 | <i>L. infantum</i> | 318  | 177 | 494  |
| LinJ05_V3.0400 | <i>L. infantum</i> | 210  | 730 | 939  |
| LinJ05_V3.0400 | <i>L. infantum</i> | 40   | 979 | 1018 |
| LinJ05_V3.0410 | <i>L. infantum</i> | 134  | 1   | 134  |
| LinJ05_V3.0410 | <i>L. infantum</i> | 43   | 222 | 264  |
| LinJ05_V3.0410 | <i>L. infantum</i> | 41   | 316 | 356  |
| LinJ05_V3.0410 | <i>L. infantum</i> | 96   | 428 | 523  |
| LinJ05_V3.0410 | <i>L. infantum</i> | 63   | 560 | 622  |
| LinJ05_V3.0430 | <i>L. infantum</i> | 60   | 41  | 100  |
| LinJ05_V3.0430 | <i>L. infantum</i> | 73   | 181 | 253  |
| LinJ05_V3.0430 | <i>L. infantum</i> | 73   | 181 | 253  |
| LinJ05_V3.0440 | <i>L. infantum</i> | 72   | 84  | 155  |
| LinJ05_V3.0460 | <i>L. infantum</i> | 69   | 1   | 69   |
| LinJ05_V3.0460 | <i>L. infantum</i> | 43   | 112 | 154  |
| LinJ05_V3.0460 | <i>L. infantum</i> | 153  | 475 | 627  |
| LinJ05_V3.0470 | <i>L. infantum</i> | 154  | 89  | 242  |
| LinJ05_V3.0480 | <i>L. infantum</i> | 127  | 211 | 337  |
| LinJ05_V3.0490 | <i>L. infantum</i> | 41   | 56  | 96   |
| LinJ05_V3.0560 | <i>L. infantum</i> | 58   | 67  | 124  |
| LinJ05_V3.0560 | <i>L. infantum</i> | 146  | 193 | 338  |
| LinJ05_V3.0570 | <i>L. infantum</i> | 59   | 192 | 250  |
| LinJ05_V3.0580 | <i>L. infantum</i> | 129  | 1   | 129  |
| LinJ05_V3.0580 | <i>L. infantum</i> | 51   | 332 | 382  |
| LinJ05_V3.0580 | <i>L. infantum</i> | 233  | 547 | 779  |
| LinJ05_V3.0590 | <i>L. infantum</i> | 194  | 17  | 210  |
| LinJ05_V3.0590 | <i>L. infantum</i> | 47   | 569 | 615  |



|                |                    |      |      |      |
|----------------|--------------------|------|------|------|
| LinJ05_V3.0590 | <i>L. infantum</i> | 51   | 680  | 730  |
| LinJ05_V3.0590 | <i>L. infantum</i> | 139  | 805  | 943  |
| LinJ05_V3.0600 | <i>L. infantum</i> | 42   | 148  | 189  |
| LinJ05_V3.0600 | <i>L. infantum</i> | 83   | 483  | 565  |
| LinJ05_V3.0600 | <i>L. infantum</i> | 45   | 630  | 674  |
| LinJ05_V3.0600 | <i>L. infantum</i> | 40   | 867  | 906  |
| LinJ05_V3.0610 | <i>L. infantum</i> | 99   | 1    | 99   |
| LinJ05_V3.0610 | <i>L. infantum</i> | 94   | 123  | 216  |
| LinJ05_V3.0610 | <i>L. infantum</i> | 157  | 324  | 480  |
| LinJ05_V3.0610 | <i>L. infantum</i> | 96   | 654  | 749  |
| LinJ05_V3.0610 | <i>L. infantum</i> | 117  | 752  | 868  |
| LinJ05_V3.0610 | <i>L. infantum</i> | 42   | 891  | 932  |
| LinJ05_V3.0620 | <i>L. infantum</i> | 149  | 95   | 243  |
| LinJ05_V3.0620 | <i>L. infantum</i> | 93   | 256  | 348  |
| LinJ05_V3.0620 | <i>L. infantum</i> | 93   | 256  | 348  |
| LinJ05_V3.0630 | <i>L. infantum</i> | 46   | 37   | 82   |
| LinJ05_V3.0630 | <i>L. infantum</i> | 42   | 395  | 436  |
| LinJ05_V3.0630 | <i>L. infantum</i> | 143  | 499  | 641  |
| LinJ05_V3.0630 | <i>L. infantum</i> | 304  | 766  | 1069 |
| LinJ05_V3.0640 | <i>L. infantum</i> | 57   | 1    | 57   |
| LinJ05_V3.0640 | <i>L. infantum</i> | 93   | 156  | 248  |
| LinJ05_V3.0640 | <i>L. infantum</i> | 45   | 512  | 556  |
| LinJ05_V3.0640 | <i>L. infantum</i> | 91   | 617  | 707  |
| LinJ05_V3.0640 | <i>L. infantum</i> | 77   | 888  | 964  |
| LinJ05_V3.0640 | <i>L. infantum</i> | 72   | 966  | 1037 |
| LinJ05_V3.0640 | <i>L. infantum</i> | 194  | 1153 | 1346 |
| LinJ05_V3.0640 | <i>L. infantum</i> | 118  | 1488 | 1605 |
| LinJ05_V3.0650 | <i>L. infantum</i> | 78   | 32   | 109  |
| LinJ05_V3.0650 | <i>L. infantum</i> | 51   | 298  | 348  |
| LinJ05_V3.0650 | <i>L. infantum</i> | 189  | 390  | 578  |
| LinJ05_V3.0650 | <i>L. infantum</i> | 129  | 673  | 801  |
| LinJ05_V3.0660 | <i>L. infantum</i> | 79   | 1    | 79   |
| LinJ05_V3.0670 | <i>L. infantum</i> | 1562 | 1    | 1562 |
| LinJ05_V3.0670 | <i>L. infantum</i> | 117  | 1606 | 1722 |
| LinJ05_V3.0670 | <i>L. infantum</i> | 519  | 1768 | 2286 |
| LinJ05_V3.0670 | <i>L. infantum</i> | 176  | 2317 | 2492 |
| LinJ05_V3.0680 | <i>L. infantum</i> | 52   | 1    | 52   |
| LinJ05_V3.0690 | <i>L. infantum</i> | 47   | 39   | 85   |
| LinJ05_V3.0690 | <i>L. infantum</i> | 389  | 116  | 504  |
| LinJ05_V3.0690 | <i>L. infantum</i> | 308  | 549  | 856  |
| LinJ05_V3.0690 | <i>L. infantum</i> | 130  | 1025 | 1154 |
| LinJ05_V3.0690 | <i>L. infantum</i> | 114  | 1248 | 1361 |
| LinJ05_V3.0690 | <i>L. infantum</i> | 319  | 1402 | 1720 |
| LinJ05_V3.0690 | <i>L. infantum</i> | 130  | 1794 | 1923 |
| LinJ05_V3.0690 | <i>L. infantum</i> | 127  | 1927 | 2053 |
| LinJ05_V3.0690 | <i>L. infantum</i> | 272  | 2074 | 2345 |
| LinJ05_V3.0700 | <i>L. infantum</i> | 986  | 1    | 986  |

|                |                    |      |      |      |
|----------------|--------------------|------|------|------|
| LinJ05_V3.0700 | <i>L. infantum</i> | 76   | 998  | 1073 |
| LinJ05_V3.0700 | <i>L. infantum</i> | 157  | 1078 | 1234 |
| LinJ05_V3.0700 | <i>L. infantum</i> | 189  | 1265 | 1453 |
| LinJ05_V3.0700 | <i>L. infantum</i> | 111  | 1477 | 1587 |
| LinJ05_V3.0700 | <i>L. infantum</i> | 117  | 1609 | 1725 |
| LinJ05_V3.0710 | <i>L. infantum</i> | 650  | 1    | 650  |
| LinJ05_V3.0710 | <i>L. infantum</i> | 44   | 820  | 863  |
| LinJ05_V3.0710 | <i>L. infantum</i> | 196  | 911  | 1106 |
| LinJ05_V3.0710 | <i>L. infantum</i> | 290  | 1111 | 1400 |
| LinJ05_V3.0720 | <i>L. infantum</i> | 340  | 63   | 402  |
| LinJ05_V3.0720 | <i>L. infantum</i> | 257  | 408  | 664  |
| LinJ05_V3.0720 | <i>L. infantum</i> | 189  | 750  | 938  |
| LinJ05_V3.0720 | <i>L. infantum</i> | 393  | 1006 | 1398 |
| LinJ05_V3.0730 | <i>L. infantum</i> | 609  | 1    | 609  |
| LinJ05_V3.0740 | <i>L. infantum</i> | 176  | 154  | 329  |
| LinJ05_V3.0750 | <i>L. infantum</i> | 47   | 53   | 99   |
| LinJ05_V3.0750 | <i>L. infantum</i> | 137  | 282  | 418  |
| LinJ05_V3.0750 | <i>L. infantum</i> | 137  | 282  | 418  |
| LinJ05_V3.0760 | <i>L. infantum</i> | 254  | 1    | 254  |
| LinJ05_V3.0760 | <i>L. infantum</i> | 67   | 276  | 342  |
| LinJ05_V3.0760 | <i>L. infantum</i> | 149  | 356  | 504  |
| LinJ05_V3.0760 | <i>L. infantum</i> | 179  | 658  | 836  |
| LinJ05_V3.0760 | <i>L. infantum</i> | 70   | 916  | 985  |
| LinJ05_V3.0760 | <i>L. infantum</i> | 149  | 1097 | 1245 |
| LinJ05_V3.0760 | <i>L. infantum</i> | 136  | 1282 | 1417 |
| LinJ05_V3.0760 | <i>L. infantum</i> | 59   | 1450 | 1508 |
| LinJ05_V3.0800 | <i>L. infantum</i> | 73   | 1    | 73   |
| LinJ05_V3.0800 | <i>L. infantum</i> | 42   | 107  | 148  |
| LinJ05_V3.0800 | <i>L. infantum</i> | 78   | 230  | 307  |
| LinJ05_V3.0820 | <i>L. infantum</i> | 63   | 186  | 248  |
| LinJ05_V3.0820 | <i>L. infantum</i> | 43   | 357  | 399  |
| LinJ05_V3.0820 | <i>L. infantum</i> | 45   | 592  | 636  |
| LinJ05_V3.0840 | <i>L. infantum</i> | 155  | 1    | 155  |
| LinJ05_V3.0840 | <i>L. infantum</i> | 472  | 166  | 637  |
| LinJ05_V3.0840 | <i>L. infantum</i> | 763  | 659  | 1421 |
| LinJ05_V3.0850 | <i>L. infantum</i> | 114  | 1    | 114  |
| LinJ05_V3.0850 | <i>L. infantum</i> | 355  | 158  | 512  |
| LinJ05_V3.0850 | <i>L. infantum</i> | 153  | 514  | 666  |
| LinJ05_V3.0860 | <i>L. infantum</i> | 95   | 61   | 155  |
| LinJ05_V3.0870 | <i>L. infantum</i> | 62   | 1    | 62   |
| LinJ05_V3.0870 | <i>L. infantum</i> | 145  | 194  | 338  |
| LinJ05_V3.0870 | <i>L. infantum</i> | 138  | 424  | 561  |
| LinJ05_V3.0870 | <i>L. infantum</i> | 1313 | 628  | 1940 |
| LinJ05_V3.0880 | <i>L. infantum</i> | 59   | 1    | 59   |
| LinJ05_V3.0890 | <i>L. infantum</i> | 64   | 249  | 312  |
| LinJ05_V3.0890 | <i>L. infantum</i> | 190  | 624  | 813  |
| LinJ05_V3.0890 | <i>L. infantum</i> | 57   | 858  | 914  |

|                |                    |     |      |      |
|----------------|--------------------|-----|------|------|
| LinJ05_V3.0890 | <i>L. infantum</i> | 52  | 1072 | 1123 |
| LinJ05_V3.0890 | <i>L. infantum</i> | 57  | 1152 | 1208 |
| LinJ05_V3.0890 | <i>L. infantum</i> | 53  | 1284 | 1336 |
| LinJ05_V3.0890 | <i>L. infantum</i> | 40  | 1364 | 1403 |
| LinJ05_V3.0890 | <i>L. infantum</i> | 132 | 1552 | 1683 |
| LinJ05_V3.0910 | <i>L. infantum</i> | 57  | 1    | 57   |
| LinJ05_V3.0910 | <i>L. infantum</i> | 72  | 104  | 175  |
| LinJ05_V3.0910 | <i>L. infantum</i> | 70  | 514  | 583  |
| LinJ05_V3.0910 | <i>L. infantum</i> | 47  | 625  | 671  |
| LinJ05_V3.0910 | <i>L. infantum</i> | 97  | 732  | 828  |
| LinJ05_V3.0910 | <i>L. infantum</i> | 57  | 986  | 1042 |
| LinJ05_V3.0920 | <i>L. infantum</i> | 44  | 1    | 44   |
| LinJ05_V3.0920 | <i>L. infantum</i> | 365 | 50   | 414  |
| LinJ05_V3.0920 | <i>L. infantum</i> | 59  | 523  | 581  |
| LinJ05_V3.0920 | <i>L. infantum</i> | 56  | 620  | 675  |
| LinJ05_V3.0920 | <i>L. infantum</i> | 268 | 821  | 1088 |
| LinJ05_V3.0930 | <i>L. infantum</i> | 250 | 162  | 411  |
| LinJ05_V3.0940 | <i>L. infantum</i> | 158 | 125  | 282  |
| LinJ05_V3.0940 | <i>L. infantum</i> | 333 | 292  | 624  |
| LinJ05_V3.0940 | <i>L. infantum</i> | 192 | 706  | 897  |
| LinJ05_V3.0940 | <i>L. infantum</i> | 217 | 979  | 1195 |
| LinJ05_V3.0940 | <i>L. infantum</i> | 41  | 1240 | 1280 |
| LinJ05_V3.0950 | <i>L. infantum</i> | 54  | 237  | 290  |
| LinJ05_V3.0950 | <i>L. infantum</i> | 46  | 334  | 379  |
| LinJ05_V3.0950 | <i>L. infantum</i> | 42  | 411  | 452  |
| LinJ05_V3.1000 | <i>L. infantum</i> | 54  | 1    | 54   |
| LinJ05_V3.1010 | <i>L. infantum</i> | 131 | 484  | 614  |
| LinJ05_V3.1020 | <i>L. infantum</i> | 67  | 179  | 245  |
| LinJ05_V3.1020 | <i>L. infantum</i> | 60  | 307  | 366  |
| LinJ05_V3.1020 | <i>L. infantum</i> | 54  | 455  | 508  |
| LinJ05_V3.1020 | <i>L. infantum</i> | 44  | 668  | 711  |
| LinJ05_V3.1020 | <i>L. infantum</i> | 53  | 736  | 788  |
| LinJ05_V3.1020 | <i>L. infantum</i> | 42  | 811  | 852  |
| LinJ05_V3.1030 | <i>L. infantum</i> | 74  | 1    | 74   |
| LinJ05_V3.1040 | <i>L. infantum</i> | 47  | 8    | 54   |
| LinJ05_V3.1040 | <i>L. infantum</i> | 61  | 212  | 272  |
| LinJ05_V3.1040 | <i>L. infantum</i> | 61  | 212  | 272  |
| LinJ05_V3.1050 | <i>L. infantum</i> | 69  | 1    | 69   |
| LinJ05_V3.1050 | <i>L. infantum</i> | 41  | 139  | 179  |
| LinJ05_V3.1060 | <i>L. infantum</i> | 41  | 145  | 185  |
| LinJ05_V3.1060 | <i>L. infantum</i> | 46  | 404  | 449  |
| LinJ05_V3.1060 | <i>L. infantum</i> | 46  | 404  | 449  |
| LinJ05_V3.1070 | <i>L. infantum</i> | 97  | 158  | 254  |
| LinJ05_V3.1070 | <i>L. infantum</i> | 44  | 314  | 357  |
| LinJ05_V3.1070 | <i>L. infantum</i> | 44  | 314  | 357  |
| LinJ05_V3.1080 | <i>L. infantum</i> | 62  | 1    | 62   |
| LinJ05_V3.1080 | <i>L. infantum</i> | 63  | 137  | 199  |

|                |                    |     |      |      |
|----------------|--------------------|-----|------|------|
| LinJ05_V3.1080 | <i>L. infantum</i> | 55  | 534  | 588  |
| LinJ05_V3.1080 | <i>L. infantum</i> | 70  | 656  | 725  |
| LinJ05_V3.1090 | <i>L. infantum</i> | 199 | 188  | 386  |
| LinJ05_V3.1090 | <i>L. infantum</i> | 130 | 390  | 519  |
| LinJ05_V3.1110 | <i>L. infantum</i> | 140 | 1    | 140  |
| LinJ05_V3.1110 | <i>L. infantum</i> | 100 | 237  | 336  |
| LinJ05_V3.1110 | <i>L. infantum</i> | 82  | 432  | 513  |
| LinJ05_V3.1110 | <i>L. infantum</i> | 222 | 707  | 928  |
| LinJ05_V3.1110 | <i>L. infantum</i> | 67  | 1087 | 1153 |
| LinJ05_V3.1130 | <i>L. infantum</i> | 44  | 465  | 508  |
| LinJ05_V3.1150 | <i>L. infantum</i> | 49  | 43   | 91   |
| LinJ05_V3.1150 | <i>L. infantum</i> | 40  | 163  | 202  |
| LinJ05_V3.1150 | <i>L. infantum</i> | 153 | 207  | 359  |
| LinJ05_V3.1150 | <i>L. infantum</i> | 148 | 436  | 583  |
| LinJ05_V3.1150 | <i>L. infantum</i> | 295 | 622  | 916  |
| LinJ05_V3.1170 | <i>L. infantum</i> | 67  | 36   | 102  |
| LinJ05_V3.1170 | <i>L. infantum</i> | 48  | 248  | 295  |
| LinJ05_V3.1170 | <i>L. infantum</i> | 135 | 324  | 458  |
| LinJ05_V3.1180 | <i>L. infantum</i> | 72  | 1    | 72   |
| LinJ05_V3.1180 | <i>L. infantum</i> | 59  | 224  | 282  |
| LinJ05_V3.1180 | <i>L. infantum</i> | 59  | 353  | 411  |
| LinJ05_V3.1180 | <i>L. infantum</i> | 122 | 551  | 672  |
| LinJ05_V3.1180 | <i>L. infantum</i> | 50  | 731  | 780  |
| LinJ05_V3.1180 | <i>L. infantum</i> | 71  | 844  | 914  |
| LinJ05_V3.1180 | <i>L. infantum</i> | 83  | 957  | 1039 |
| LinJ05_V3.1180 | <i>L. infantum</i> | 104 | 1209 | 1312 |
| LinJ05_V3.1180 | <i>L. infantum</i> | 98  | 1369 | 1466 |
| LinJ05_V3.1180 | <i>L. infantum</i> | 140 | 1470 | 1609 |
| LinJ05_V3.1180 | <i>L. infantum</i> | 327 | 1633 | 1959 |
| LinJ05_V3.1190 | <i>L. infantum</i> | 55  | 1    | 55   |
| LinJ05_V3.1190 | <i>L. infantum</i> | 44  | 92   | 135  |
| LinJ05_V3.1190 | <i>L. infantum</i> | 44  | 92   | 135  |
| LinJ05_V3.1200 | <i>L. infantum</i> | 63  | 1    | 63   |
| LinJ06_V3.0010 | <i>L. infantum</i> | 46  | 1    | 46   |
| LinJ06_V3.0030 | <i>L. infantum</i> | 63  | 52   | 114  |
| LinJ06_V3.0030 | <i>L. infantum</i> | 121 | 135  | 255  |
| LinJ06_V3.0030 | <i>L. infantum</i> | 41  | 329  | 369  |
| LinJ06_V3.0050 | <i>L. infantum</i> | 164 | 1    | 164  |
| LinJ06_V3.0060 | <i>L. infantum</i> | 54  | 60   | 113  |
| LinJ06_V3.0060 | <i>L. infantum</i> | 107 | 216  | 322  |
| LinJ06_V3.0080 | <i>L. infantum</i> | 47  | 1    | 47   |
| LinJ06_V3.0090 | <i>L. infantum</i> | 43  | 1    | 43   |
| LinJ06_V3.0110 | <i>L. infantum</i> | 99  | 103  | 201  |
| LinJ06_V3.0110 | <i>L. infantum</i> | 46  | 205  | 250  |
| LinJ06_V3.0110 | <i>L. infantum</i> | 101 | 342  | 442  |
| LinJ06_V3.0140 | <i>L. infantum</i> | 40  | 1    | 40   |
| LinJ06_V3.0180 | <i>L. infantum</i> | 52  | 120  | 171  |

|                |                    |     |      |      |
|----------------|--------------------|-----|------|------|
| LinJ06_V3.0180 | <i>L. infantum</i> | 141 | 234  | 374  |
| LinJ06_V3.0180 | <i>L. infantum</i> | 146 | 450  | 595  |
| LinJ06_V3.0190 | <i>L. infantum</i> | 76  | 100  | 175  |
| LinJ06_V3.0190 | <i>L. infantum</i> | 63  | 222  | 284  |
| LinJ06_V3.0190 | <i>L. infantum</i> | 174 | 319  | 492  |
| LinJ06_V3.0190 | <i>L. infantum</i> | 51  | 537  | 587  |
| LinJ06_V3.0200 | <i>L. infantum</i> | 333 | 1    | 333  |
| LinJ06_V3.0210 | <i>L. infantum</i> | 74  | 59   | 132  |
| LinJ06_V3.0210 | <i>L. infantum</i> | 75  | 202  | 276  |
| LinJ06_V3.0210 | <i>L. infantum</i> | 84  | 292  | 375  |
| LinJ06_V3.0210 | <i>L. infantum</i> | 110 | 393  | 502  |
| LinJ06_V3.0210 | <i>L. infantum</i> | 55  | 562  | 616  |
| LinJ06_V3.0220 | <i>L. infantum</i> | 74  | 213  | 286  |
| LinJ06_V3.0240 | <i>L. infantum</i> | 53  | 549  | 601  |
| LinJ06_V3.0240 | <i>L. infantum</i> | 40  | 652  | 691  |
| LinJ06_V3.0240 | <i>L. infantum</i> | 98  | 703  | 800  |
| LinJ06_V3.0250 | <i>L. infantum</i> | 144 | 113  | 256  |
| LinJ06_V3.0260 | <i>L. infantum</i> | 50  | 1061 | 1110 |
| LinJ06_V3.0260 | <i>L. infantum</i> | 149 | 1178 | 1326 |
| LinJ06_V3.0270 | <i>L. infantum</i> | 40  | 1    | 40   |
| LinJ06_V3.0270 | <i>L. infantum</i> | 64  | 103  | 166  |
| LinJ06_V3.0270 | <i>L. infantum</i> | 43  | 189  | 231  |
| LinJ06_V3.0270 | <i>L. infantum</i> | 50  | 263  | 312  |
| LinJ06_V3.0280 | <i>L. infantum</i> | 76  | 79   | 154  |
| LinJ06_V3.0280 | <i>L. infantum</i> | 63  | 217  | 279  |
| LinJ06_V3.0280 | <i>L. infantum</i> | 45  | 350  | 394  |
| LinJ06_V3.0280 | <i>L. infantum</i> | 112 | 529  | 640  |
| LinJ06_V3.0280 | <i>L. infantum</i> | 67  | 662  | 728  |
| LinJ06_V3.0280 | <i>L. infantum</i> | 102 | 741  | 842  |
| LinJ06_V3.0310 | <i>L. infantum</i> | 49  | 1    | 49   |
| LinJ06_V3.0310 | <i>L. infantum</i> | 51  | 287  | 337  |
| LinJ06_V3.0310 | <i>L. infantum</i> | 51  | 287  | 337  |
| LinJ06_V3.0320 | <i>L. infantum</i> | 101 | 15   | 115  |
| LinJ06_V3.0320 | <i>L. infantum</i> | 131 | 162  | 292  |
| LinJ06_V3.0320 | <i>L. infantum</i> | 574 | 298  | 871  |
| LinJ06_V3.0320 | <i>L. infantum</i> | 55  | 883  | 937  |
| LinJ06_V3.0330 | <i>L. infantum</i> | 146 | 311  | 456  |
| LinJ06_V3.0330 | <i>L. infantum</i> | 79  | 790  | 868  |
| LinJ06_V3.0330 | <i>L. infantum</i> | 176 | 890  | 1065 |
| LinJ06_V3.0340 | <i>L. infantum</i> | 51  | 32   | 82   |
| LinJ06_V3.0340 | <i>L. infantum</i> | 49  | 857  | 905  |
| LinJ06_V3.0340 | <i>L. infantum</i> | 49  | 857  | 905  |
| LinJ06_V3.0380 | <i>L. infantum</i> | 43  | 30   | 72   |
| LinJ06_V3.0380 | <i>L. infantum</i> | 70  | 311  | 380  |
| LinJ06_V3.0380 | <i>L. infantum</i> | 70  | 311  | 380  |
| LinJ06_V3.0390 | <i>L. infantum</i> | 52  | 373  | 424  |
| LinJ06_V3.0390 | <i>L. infantum</i> | 42  | 475  | 516  |

|                |                    |     |      |      |
|----------------|--------------------|-----|------|------|
| LinJ06_V3.0390 | <i>L. infantum</i> | 101 | 644  | 744  |
| LinJ06_V3.0390 | <i>L. infantum</i> | 59  | 779  | 837  |
| LinJ06_V3.0390 | <i>L. infantum</i> | 69  | 839  | 907  |
| LinJ06_V3.0410 | <i>L. infantum</i> | 48  | 54   | 101  |
| LinJ06_V3.0410 | <i>L. infantum</i> | 113 | 133  | 245  |
| LinJ06_V3.0420 | <i>L. infantum</i> | 131 | 35   | 165  |
| LinJ06_V3.0430 | <i>L. infantum</i> | 48  | 54   | 101  |
| LinJ06_V3.0430 | <i>L. infantum</i> | 106 | 133  | 238  |
| LinJ06_V3.0440 | <i>L. infantum</i> | 69  | 1    | 69   |
| LinJ06_V3.0440 | <i>L. infantum</i> | 313 | 138  | 450  |
| LinJ06_V3.0440 | <i>L. infantum</i> | 73  | 500  | 572  |
| LinJ06_V3.0450 | <i>L. infantum</i> | 114 | 1    | 114  |
| LinJ06_V3.0450 | <i>L. infantum</i> | 59  | 172  | 230  |
| LinJ06_V3.0450 | <i>L. infantum</i> | 214 | 478  | 691  |
| LinJ06_V3.0460 | <i>L. infantum</i> | 117 | 24   | 140  |
| LinJ06_V3.0460 | <i>L. infantum</i> | 44  | 291  | 334  |
| LinJ06_V3.0460 | <i>L. infantum</i> | 321 | 417  | 737  |
| LinJ06_V3.0460 | <i>L. infantum</i> | 75  | 743  | 817  |
| LinJ06_V3.0460 | <i>L. infantum</i> | 94  | 899  | 992  |
| LinJ06_V3.0470 | <i>L. infantum</i> | 198 | 1    | 198  |
| LinJ06_V3.0470 | <i>L. infantum</i> | 109 | 232  | 340  |
| LinJ06_V3.0480 | <i>L. infantum</i> | 157 | 32   | 188  |
| LinJ06_V3.0480 | <i>L. infantum</i> | 177 | 307  | 483  |
| LinJ06_V3.0480 | <i>L. infantum</i> | 367 | 498  | 864  |
| LinJ06_V3.0480 | <i>L. infantum</i> | 71  | 929  | 999  |
| LinJ06_V3.0490 | <i>L. infantum</i> | 107 | 1    | 107  |
| LinJ06_V3.0490 | <i>L. infantum</i> | 85  | 173  | 257  |
| LinJ06_V3.0490 | <i>L. infantum</i> | 57  | 298  | 354  |
| LinJ06_V3.0490 | <i>L. infantum</i> | 211 | 381  | 591  |
| LinJ06_V3.0490 | <i>L. infantum</i> | 102 | 597  | 698  |
| LinJ06_V3.0490 | <i>L. infantum</i> | 178 | 789  | 966  |
| LinJ06_V3.0490 | <i>L. infantum</i> | 88  | 1011 | 1098 |
| LinJ06_V3.0500 | <i>L. infantum</i> | 52  | 274  | 325  |
| LinJ06_V3.0520 | <i>L. infantum</i> | 57  | 48   | 104  |
| LinJ06_V3.0520 | <i>L. infantum</i> | 51  | 123  | 173  |
| LinJ06_V3.0520 | <i>L. infantum</i> | 70  | 324  | 393  |
| LinJ06_V3.0520 | <i>L. infantum</i> | 76  | 430  | 505  |
| LinJ06_V3.0530 | <i>L. infantum</i> | 53  | 72   | 124  |
| LinJ06_V3.0530 | <i>L. infantum</i> | 93  | 285  | 377  |
| LinJ06_V3.0530 | <i>L. infantum</i> | 76  | 507  | 582  |
| LinJ06_V3.0530 | <i>L. infantum</i> | 42  | 638  | 679  |
| LinJ06_V3.0540 | <i>L. infantum</i> | 42  | 1    | 42   |
| LinJ06_V3.0540 | <i>L. infantum</i> | 330 | 84   | 413  |
| LinJ06_V3.0540 | <i>L. infantum</i> | 108 | 443  | 550  |
| LinJ06_V3.0540 | <i>L. infantum</i> | 91  | 568  | 658  |
| LinJ06_V3.0540 | <i>L. infantum</i> | 141 | 685  | 825  |
| LinJ06_V3.0540 | <i>L. infantum</i> | 255 | 858  | 1112 |

|                |                    |     |      |      |
|----------------|--------------------|-----|------|------|
| LinJ06_V3.0540 | <i>L. infantum</i> | 80  | 1239 | 1318 |
| LinJ06_V3.0540 | <i>L. infantum</i> | 74  | 1376 | 1449 |
| LinJ06_V3.0550 | <i>L. infantum</i> | 83  | 97   | 179  |
| LinJ06_V3.0560 | <i>L. infantum</i> | 238 | 1    | 238  |
| LinJ06_V3.0560 | <i>L. infantum</i> | 142 | 240  | 381  |
| LinJ06_V3.0560 | <i>L. infantum</i> | 297 | 630  | 926  |
| LinJ06_V3.0560 | <i>L. infantum</i> | 44  | 933  | 976  |
| LinJ06_V3.0570 | <i>L. infantum</i> | 148 | 1    | 148  |
| LinJ06_V3.0570 | <i>L. infantum</i> | 157 | 213  | 369  |
| LinJ06_V3.0570 | <i>L. infantum</i> | 60  | 378  | 437  |
| LinJ06_V3.0570 | <i>L. infantum</i> | 61  | 580  | 640  |
| LinJ06_V3.0570 | <i>L. infantum</i> | 60  | 754  | 813  |
| LinJ06_V3.0570 | <i>L. infantum</i> | 96  | 840  | 935  |
| LinJ06_V3.0570 | <i>L. infantum</i> | 115 | 1150 | 1264 |
| LinJ06_V3.0570 | <i>L. infantum</i> | 57  | 1570 | 1626 |
| LinJ06_V3.0570 | <i>L. infantum</i> | 50  | 1684 | 1733 |
| LinJ06_V3.0590 | <i>L. infantum</i> | 58  | 1    | 58   |
| LinJ06_V3.0610 | <i>L. infantum</i> | 69  | 85   | 153  |
| LinJ06_V3.0610 | <i>L. infantum</i> | 65  | 243  | 307  |
| LinJ06_V3.0610 | <i>L. infantum</i> | 106 | 441  | 546  |
| LinJ06_V3.0610 | <i>L. infantum</i> | 680 | 556  | 1235 |
| LinJ06_V3.0610 | <i>L. infantum</i> | 254 | 1254 | 1507 |
| LinJ06_V3.0620 | <i>L. infantum</i> | 69  | 107  | 175  |
| LinJ06_V3.0620 | <i>L. infantum</i> | 213 | 196  | 408  |
| LinJ06_V3.0620 | <i>L. infantum</i> | 51  | 412  | 462  |
| LinJ06_V3.0620 | <i>L. infantum</i> | 84  | 529  | 612  |
| LinJ06_V3.0620 | <i>L. infantum</i> | 62  | 807  | 868  |
| LinJ06_V3.0620 | <i>L. infantum</i> | 100 | 883  | 982  |
| LinJ06_V3.0620 | <i>L. infantum</i> | 126 | 1065 | 1190 |
| LinJ06_V3.0620 | <i>L. infantum</i> | 92  | 1203 | 1294 |
| LinJ06_V3.0630 | <i>L. infantum</i> | 51  | 1    | 51   |
| LinJ06_V3.0640 | <i>L. infantum</i> | 49  | 509  | 557  |
| LinJ06_V3.0650 | <i>L. infantum</i> | 90  | 1    | 90   |
| LinJ06_V3.0650 | <i>L. infantum</i> | 134 | 173  | 306  |
| LinJ06_V3.0650 | <i>L. infantum</i> | 40  | 358  | 397  |
| LinJ06_V3.0650 | <i>L. infantum</i> | 81  | 590  | 670  |
| LinJ06_V3.0650 | <i>L. infantum</i> | 132 | 686  | 817  |
| LinJ06_V3.0650 | <i>L. infantum</i> | 302 | 963  | 1264 |
| LinJ06_V3.0650 | <i>L. infantum</i> | 157 | 1287 | 1443 |
| LinJ06_V3.0650 | <i>L. infantum</i> | 219 | 1597 | 1815 |
| LinJ06_V3.0660 | <i>L. infantum</i> | 186 | 1    | 186  |
| LinJ06_V3.0660 | <i>L. infantum</i> | 45  | 507  | 551  |
| LinJ06_V3.0660 | <i>L. infantum</i> | 287 | 605  | 891  |
| LinJ06_V3.0660 | <i>L. infantum</i> | 82  | 958  | 1039 |
| LinJ06_V3.0660 | <i>L. infantum</i> | 123 | 1174 | 1296 |
| LinJ06_V3.0660 | <i>L. infantum</i> | 145 | 1338 | 1482 |
| LinJ06_V3.0660 | <i>L. infantum</i> | 167 | 1505 | 1671 |

|                |                    |     |      |      |
|----------------|--------------------|-----|------|------|
| LinJ06_V3.0660 | <i>L. infantum</i> | 129 | 1673 | 1801 |
| LinJ06_V3.0660 | <i>L. infantum</i> | 622 | 1840 | 2461 |
| LinJ06_V3.0660 | <i>L. infantum</i> | 51  | 2496 | 2546 |
| LinJ06_V3.0660 | <i>L. infantum</i> | 114 | 2599 | 2712 |
| LinJ06_V3.0660 | <i>L. infantum</i> | 158 | 2992 | 3149 |
| LinJ06_V3.0670 | <i>L. infantum</i> | 43  | 1    | 43   |
| LinJ06_V3.0680 | <i>L. infantum</i> | 373 | 1    | 373  |
| LinJ06_V3.0680 | <i>L. infantum</i> | 68  | 376  | 443  |
| LinJ06_V3.0680 | <i>L. infantum</i> | 187 | 480  | 666  |
| LinJ06_V3.0690 | <i>L. infantum</i> | 145 | 1    | 145  |
| LinJ06_V3.0690 | <i>L. infantum</i> | 204 | 151  | 354  |
| LinJ06_V3.0690 | <i>L. infantum</i> | 380 | 376  | 755  |
| LinJ06_V3.0690 | <i>L. infantum</i> | 56  | 757  | 812  |
| LinJ06_V3.0690 | <i>L. infantum</i> | 212 | 848  | 1059 |
| LinJ06_V3.0700 | <i>L. infantum</i> | 103 | 1    | 103  |
| LinJ06_V3.0710 | <i>L. infantum</i> | 165 | 25   | 189  |
| LinJ06_V3.0710 | <i>L. infantum</i> | 78  | 203  | 280  |
| LinJ06_V3.0710 | <i>L. infantum</i> | 81  | 294  | 374  |
| LinJ06_V3.0720 | <i>L. infantum</i> | 100 | 1    | 100  |
| LinJ06_V3.0720 | <i>L. infantum</i> | 105 | 166  | 270  |
| LinJ06_V3.0720 | <i>L. infantum</i> | 93  | 309  | 401  |
| LinJ06_V3.0720 | <i>L. infantum</i> | 56  | 555  | 610  |
| LinJ06_V3.0720 | <i>L. infantum</i> | 46  | 647  | 692  |
| LinJ06_V3.0720 | <i>L. infantum</i> | 58  | 837  | 894  |
| LinJ06_V3.0720 | <i>L. infantum</i> | 58  | 1140 | 1197 |
| LinJ06_V3.0720 | <i>L. infantum</i> | 56  | 1255 | 1310 |
| LinJ06_V3.0720 | <i>L. infantum</i> | 74  | 1547 | 1620 |
| LinJ06_V3.0720 | <i>L. infantum</i> | 45  | 1684 | 1728 |
| LinJ06_V3.0720 | <i>L. infantum</i> | 43  | 1903 | 1945 |
| LinJ06_V3.0720 | <i>L. infantum</i> | 80  | 2306 | 2385 |
| LinJ06_V3.0720 | <i>L. infantum</i> | 213 | 2419 | 2631 |
| LinJ06_V3.0730 | <i>L. infantum</i> | 467 | 131  | 597  |
| LinJ06_V3.0750 | <i>L. infantum</i> | 62  | 1    | 62   |
| LinJ06_V3.0750 | <i>L. infantum</i> | 544 | 85   | 628  |
| LinJ06_V3.0750 | <i>L. infantum</i> | 157 | 631  | 787  |
| LinJ06_V3.0750 | <i>L. infantum</i> | 84  | 837  | 920  |
| LinJ06_V3.0750 | <i>L. infantum</i> | 52  | 1000 | 1051 |
| LinJ06_V3.0750 | <i>L. infantum</i> | 197 | 1076 | 1272 |
| LinJ06_V3.0750 | <i>L. infantum</i> | 86  | 1339 | 1424 |
| LinJ06_V3.0750 | <i>L. infantum</i> | 47  | 1480 | 1526 |
| LinJ06_V3.0750 | <i>L. infantum</i> | 73  | 1610 | 1682 |
| LinJ06_V3.0750 | <i>L. infantum</i> | 40  | 1689 | 1728 |
| LinJ06_V3.0770 | <i>L. infantum</i> | 549 | 1    | 549  |
| LinJ06_V3.0770 | <i>L. infantum</i> | 93  | 565  | 657  |
| LinJ06_V3.0770 | <i>L. infantum</i> | 129 | 679  | 807  |
| LinJ06_V3.0770 | <i>L. infantum</i> | 51  | 841  | 891  |
| LinJ06_V3.0780 | <i>L. infantum</i> | 126 | 130  | 255  |



|                |                    |     |      |      |
|----------------|--------------------|-----|------|------|
| LinJ06_V3.0780 | <i>L. infantum</i> | 40  | 386  | 425  |
| LinJ06_V3.0780 | <i>L. infantum</i> | 78  | 529  | 606  |
| LinJ06_V3.0790 | <i>L. infantum</i> | 141 | 1    | 141  |
| LinJ06_V3.0790 | <i>L. infantum</i> | 108 | 173  | 280  |
| LinJ06_V3.0790 | <i>L. infantum</i> | 79  | 310  | 388  |
| LinJ06_V3.0790 | <i>L. infantum</i> | 559 | 434  | 992  |
| LinJ06_V3.0790 | <i>L. infantum</i> | 166 | 1019 | 1184 |
| LinJ06_V3.0800 | <i>L. infantum</i> | 107 | 1    | 107  |
| LinJ06_V3.0800 | <i>L. infantum</i> | 610 | 119  | 728  |
| LinJ06_V3.0800 | <i>L. infantum</i> | 314 | 793  | 1106 |
| LinJ06_V3.0800 | <i>L. infantum</i> | 81  | 1185 | 1265 |
| LinJ06_V3.0800 | <i>L. infantum</i> | 141 | 1354 | 1494 |
| LinJ06_V3.0800 | <i>L. infantum</i> | 286 | 1531 | 1816 |
| LinJ06_V3.0810 | <i>L. infantum</i> | 203 | 1    | 203  |
| LinJ06_V3.0810 | <i>L. infantum</i> | 338 | 206  | 543  |
| LinJ06_V3.0810 | <i>L. infantum</i> | 826 | 576  | 1401 |
| LinJ06_V3.0810 | <i>L. infantum</i> | 689 | 1412 | 2100 |
| LinJ06_V3.0810 | <i>L. infantum</i> | 57  | 2121 | 2177 |
| LinJ06_V3.0810 | <i>L. infantum</i> | 65  | 2216 | 2280 |
| LinJ06_V3.0810 | <i>L. infantum</i> | 216 | 2285 | 2500 |
| LinJ06_V3.0810 | <i>L. infantum</i> | 367 | 2531 | 2897 |
| LinJ06_V3.0810 | <i>L. infantum</i> | 235 | 2909 | 3143 |
| LinJ06_V3.0810 | <i>L. infantum</i> | 163 | 3178 | 3340 |
| LinJ06_V3.0820 | <i>L. infantum</i> | 192 | 67   | 258  |
| LinJ06_V3.0820 | <i>L. infantum</i> | 257 | 260  | 516  |
| LinJ06_V3.0820 | <i>L. infantum</i> | 296 | 520  | 815  |
| LinJ06_V3.0820 | <i>L. infantum</i> | 154 | 830  | 983  |
| LinJ06_V3.0820 | <i>L. infantum</i> | 75  | 1000 | 1074 |
| LinJ06_V3.0830 | <i>L. infantum</i> | 228 | 1    | 228  |
| LinJ06_V3.0830 | <i>L. infantum</i> | 222 | 274  | 495  |
| LinJ06_V3.0830 | <i>L. infantum</i> | 173 | 605  | 777  |
| LinJ06_V3.0830 | <i>L. infantum</i> | 220 | 786  | 1005 |
| LinJ06_V3.0830 | <i>L. infantum</i> | 113 | 1023 | 1135 |
| LinJ06_V3.0830 | <i>L. infantum</i> | 73  | 1209 | 1281 |
| LinJ06_V3.0830 | <i>L. infantum</i> | 50  | 1429 | 1478 |
| LinJ06_V3.0830 | <i>L. infantum</i> | 47  | 1480 | 1526 |
| LinJ06_V3.0830 | <i>L. infantum</i> | 40  | 1556 | 1595 |
| LinJ06_V3.0840 | <i>L. infantum</i> | 199 | 49   | 247  |
| LinJ06_V3.0840 | <i>L. infantum</i> | 82  | 292  | 373  |
| LinJ06_V3.0840 | <i>L. infantum</i> | 54  | 424  | 477  |
| LinJ06_V3.0840 | <i>L. infantum</i> | 48  | 484  | 531  |
| LinJ06_V3.0840 | <i>L. infantum</i> | 197 | 675  | 871  |
| LinJ06_V3.0840 | <i>L. infantum</i> | 67  | 977  | 1043 |
| LinJ06_V3.0840 | <i>L. infantum</i> | 62  | 1106 | 1167 |
| LinJ06_V3.0840 | <i>L. infantum</i> | 86  | 1431 | 1516 |
| LinJ06_V3.0840 | <i>L. infantum</i> | 64  | 1536 | 1599 |
| LinJ06_V3.0840 | <i>L. infantum</i> | 47  | 1646 | 1692 |

|                |                    |     |      |      |
|----------------|--------------------|-----|------|------|
| LinJ06_V3.0840 | <i>L. infantum</i> | 47  | 1932 | 1978 |
| LinJ06_V3.0840 | <i>L. infantum</i> | 41  | 2112 | 2152 |
| LinJ06_V3.0840 | <i>L. infantum</i> | 65  | 2328 | 2392 |
| LinJ06_V3.0840 | <i>L. infantum</i> | 59  | 2703 | 2761 |
| LinJ06_V3.0840 | <i>L. infantum</i> | 101 | 2846 | 2946 |
| LinJ06_V3.0840 | <i>L. infantum</i> | 52  | 2981 | 3032 |
| LinJ06_V3.0840 | <i>L. infantum</i> | 42  | 3087 | 3128 |
| LinJ06_V3.0840 | <i>L. infantum</i> | 102 | 3262 | 3363 |
| LinJ06_V3.0840 | <i>L. infantum</i> | 41  | 3455 | 3495 |
| LinJ06_V3.0840 | <i>L. infantum</i> | 52  | 3507 | 3558 |
| LinJ06_V3.0850 | <i>L. infantum</i> | 58  | 1    | 58   |
| LinJ06_V3.0850 | <i>L. infantum</i> | 126 | 63   | 188  |
| LinJ06_V3.0850 | <i>L. infantum</i> | 86  | 227  | 312  |
| LinJ06_V3.0860 | <i>L. infantum</i> | 59  | 88   | 146  |
| LinJ06_V3.0860 | <i>L. infantum</i> | 295 | 149  | 443  |
| LinJ06_V3.0860 | <i>L. infantum</i> | 118 | 488  | 605  |
| LinJ06_V3.0860 | <i>L. infantum</i> | 240 | 839  | 1078 |
| LinJ06_V3.0860 | <i>L. infantum</i> | 310 | 1080 | 1389 |
| LinJ06_V3.0870 | <i>L. infantum</i> | 161 | 72   | 232  |
| LinJ06_V3.0880 | <i>L. infantum</i> | 42  | 1    | 42   |
| LinJ06_V3.0880 | <i>L. infantum</i> | 442 | 49   | 490  |
| LinJ06_V3.0880 | <i>L. infantum</i> | 276 | 529  | 804  |
| LinJ06_V3.0880 | <i>L. infantum</i> | 44  | 886  | 929  |
| LinJ06_V3.0880 | <i>L. infantum</i> | 87  | 1001 | 1087 |
| LinJ06_V3.0880 | <i>L. infantum</i> | 42  | 1126 | 1167 |
| LinJ06_V3.0880 | <i>L. infantum</i> | 183 | 1173 | 1355 |
| LinJ06_V3.0880 | <i>L. infantum</i> | 81  | 1384 | 1464 |
| LinJ06_V3.0880 | <i>L. infantum</i> | 84  | 1514 | 1597 |
| LinJ06_V3.0880 | <i>L. infantum</i> | 102 | 1678 | 1779 |
| LinJ06_V3.0880 | <i>L. infantum</i> | 566 | 1796 | 2361 |
| LinJ06_V3.0880 | <i>L. infantum</i> | 200 | 2394 | 2593 |
| LinJ06_V3.0880 | <i>L. infantum</i> | 44  | 2612 | 2655 |
| LinJ06_V3.0880 | <i>L. infantum</i> | 144 | 2712 | 2855 |
| LinJ06_V3.0880 | <i>L. infantum</i> | 45  | 2925 | 2969 |
| LinJ06_V3.0880 | <i>L. infantum</i> | 199 | 3167 | 3365 |
| LinJ06_V3.0900 | <i>L. infantum</i> | 72  | 1    | 72   |
| LinJ06_V3.0900 | <i>L. infantum</i> | 44  | 395  | 438  |
| LinJ06_V3.0900 | <i>L. infantum</i> | 44  | 395  | 438  |
| LinJ06_V3.0910 | <i>L. infantum</i> | 40  | 1    | 40   |
| LinJ06_V3.0920 | <i>L. infantum</i> | 65  | 22   | 86   |
| LinJ06_V3.0920 | <i>L. infantum</i> | 49  | 92   | 140  |
| LinJ06_V3.0920 | <i>L. infantum</i> | 102 | 226  | 327  |
| LinJ06_V3.0920 | <i>L. infantum</i> | 63  | 427  | 489  |
| LinJ06_V3.0920 | <i>L. infantum</i> | 209 | 527  | 735  |
| LinJ06_V3.0930 | <i>L. infantum</i> | 186 | 1    | 186  |
| LinJ06_V3.0930 | <i>L. infantum</i> | 668 | 206  | 873  |
| LinJ06_V3.0930 | <i>L. infantum</i> | 121 | 889  | 1009 |

|                |                    |     |      |      |
|----------------|--------------------|-----|------|------|
| LinJ06_V3.0930 | <i>L. infantum</i> | 146 | 1020 | 1165 |
| LinJ06_V3.0930 | <i>L. infantum</i> | 58  | 1205 | 1262 |
| LinJ06_V3.0930 | <i>L. infantum</i> | 70  | 1314 | 1383 |
| LinJ06_V3.0930 | <i>L. infantum</i> | 183 | 1467 | 1649 |
| LinJ06_V3.0930 | <i>L. infantum</i> | 114 | 1701 | 1814 |
| LinJ06_V3.0950 | <i>L. infantum</i> | 42  | 1    | 42   |
| LinJ06_V3.0950 | <i>L. infantum</i> | 160 | 246  | 405  |
| LinJ06_V3.0970 | <i>L. infantum</i> | 54  | 148  | 201  |
| LinJ06_V3.0970 | <i>L. infantum</i> | 44  | 251  | 294  |
| LinJ06_V3.0970 | <i>L. infantum</i> | 80  | 314  | 393  |
| LinJ06_V3.0970 | <i>L. infantum</i> | 58  | 531  | 588  |
| LinJ06_V3.1000 | <i>L. infantum</i> | 51  | 282  | 332  |
| LinJ06_V3.1000 | <i>L. infantum</i> | 97  | 436  | 532  |
| LinJ06_V3.1000 | <i>L. infantum</i> | 108 | 546  | 653  |
| LinJ06_V3.1000 | <i>L. infantum</i> | 47  | 730  | 776  |
| LinJ06_V3.1000 | <i>L. infantum</i> | 124 | 1217 | 1340 |
| LinJ06_V3.1000 | <i>L. infantum</i> | 132 | 1368 | 1499 |
| LinJ06_V3.1010 | <i>L. infantum</i> | 52  | 1    | 52   |
| LinJ06_V3.1010 | <i>L. infantum</i> | 52  | 296  | 347  |
| LinJ06_V3.1010 | <i>L. infantum</i> | 52  | 296  | 347  |
| LinJ06_V3.1020 | <i>L. infantum</i> | 107 | 1    | 107  |
| LinJ06_V3.1020 | <i>L. infantum</i> | 83  | 168  | 250  |
| LinJ06_V3.1020 | <i>L. infantum</i> | 102 | 760  | 861  |
| LinJ06_V3.1020 | <i>L. infantum</i> | 163 | 875  | 1037 |
| LinJ06_V3.1030 | <i>L. infantum</i> | 46  | 69   | 114  |
| LinJ06_V3.1040 | <i>L. infantum</i> | 93  | 79   | 171  |
| LinJ06_V3.1040 | <i>L. infantum</i> | 43  | 223  | 265  |
| LinJ06_V3.1040 | <i>L. infantum</i> | 43  | 223  | 265  |
| LinJ06_V3.1050 | <i>L. infantum</i> | 56  | 1    | 56   |
| LinJ06_V3.1050 | <i>L. infantum</i> | 69  | 117  | 185  |
| LinJ06_V3.1050 | <i>L. infantum</i> | 49  | 286  | 334  |
| LinJ06_V3.1050 | <i>L. infantum</i> | 50  | 552  | 601  |
| LinJ06_V3.1060 | <i>L. infantum</i> | 151 | 80   | 230  |
| LinJ06_V3.1070 | <i>L. infantum</i> | 48  | 153  | 200  |
| LinJ06_V3.1070 | <i>L. infantum</i> | 81  | 381  | 461  |
| LinJ06_V3.1070 | <i>L. infantum</i> | 210 | 494  | 703  |
| LinJ06_V3.1070 | <i>L. infantum</i> | 123 | 714  | 836  |
| LinJ06_V3.1080 | <i>L. infantum</i> | 214 | 1    | 214  |
| LinJ06_V3.1080 | <i>L. infantum</i> | 137 | 275  | 411  |
| LinJ06_V3.1080 | <i>L. infantum</i> | 86  | 482  | 567  |
| LinJ06_V3.1080 | <i>L. infantum</i> | 72  | 612  | 683  |
| LinJ06_V3.1100 | <i>L. infantum</i> | 44  | 1    | 44   |
| LinJ06_V3.1130 | <i>L. infantum</i> | 147 | 1    | 147  |
| LinJ06_V3.1130 | <i>L. infantum</i> | 78  | 185  | 262  |
| LinJ06_V3.1130 | <i>L. infantum</i> | 104 | 282  | 385  |
| LinJ06_V3.1130 | <i>L. infantum</i> | 133 | 463  | 595  |
| LinJ06_V3.1150 | <i>L. infantum</i> | 130 | 1    | 130  |

|                |                    |     |      |      |
|----------------|--------------------|-----|------|------|
| LinJ06_V3.1150 | <i>L. infantum</i> | 716 | 204  | 919  |
| LinJ06_V3.1150 | <i>L. infantum</i> | 69  | 983  | 1051 |
| LinJ06_V3.1150 | <i>L. infantum</i> | 48  | 1060 | 1107 |
| LinJ06_V3.1180 | <i>L. infantum</i> | 67  | 1    | 67   |
| LinJ06_V3.1180 | <i>L. infantum</i> | 44  | 130  | 173  |
| LinJ06_V3.1180 | <i>L. infantum</i> | 149 | 322  | 470  |
| LinJ06_V3.1180 | <i>L. infantum</i> | 54  | 699  | 752  |
| LinJ06_V3.1190 | <i>L. infantum</i> | 98  | 110  | 207  |
| LinJ06_V3.1190 | <i>L. infantum</i> | 92  | 259  | 350  |
| LinJ06_V3.1190 | <i>L. infantum</i> | 63  | 459  | 521  |
| LinJ06_V3.1220 | <i>L. infantum</i> | 56  | 220  | 275  |
| LinJ06_V3.1220 | <i>L. infantum</i> | 49  | 407  | 455  |
| LinJ06_V3.1220 | <i>L. infantum</i> | 49  | 407  | 455  |
| LinJ06_V3.1250 | <i>L. infantum</i> | 64  | 21   | 84   |
| LinJ06_V3.1250 | <i>L. infantum</i> | 56  | 151  | 206  |
| LinJ06_V3.1250 | <i>L. infantum</i> | 156 | 225  | 380  |
| LinJ06_V3.1260 | <i>L. infantum</i> | 52  | 453  | 504  |
| LinJ06_V3.1270 | <i>L. infantum</i> | 67  | 89   | 155  |
| LinJ06_V3.1270 | <i>L. infantum</i> | 44  | 269  | 312  |
| LinJ06_V3.1270 | <i>L. infantum</i> | 325 | 379  | 703  |
| LinJ06_V3.1270 | <i>L. infantum</i> | 83  | 709  | 791  |
| LinJ06_V3.1280 | <i>L. infantum</i> | 44  | 1    | 44   |
| LinJ06_V3.1290 | <i>L. infantum</i> | 57  | 1    | 57   |
| LinJ06_V3.1310 | <i>L. infantum</i> | 52  | 1    | 52   |
| LinJ06_V3.1360 | <i>L. infantum</i> | 74  | 504  | 577  |
| LinJ07_V3.0020 | <i>L. infantum</i> | 49  | 29   | 77   |
| LinJ07_V3.0020 | <i>L. infantum</i> | 64  | 158  | 221  |
| LinJ07_V3.0050 | <i>L. infantum</i> | 48  | 36   | 83   |
| LinJ07_V3.0050 | <i>L. infantum</i> | 76  | 239  | 314  |
| LinJ07_V3.0050 | <i>L. infantum</i> | 76  | 239  | 314  |
| LinJ07_V3.0060 | <i>L. infantum</i> | 53  | 644  | 696  |
| LinJ07_V3.0070 | <i>L. infantum</i> | 192 | 127  | 318  |
| LinJ07_V3.0080 | <i>L. infantum</i> | 42  | 63   | 104  |
| LinJ07_V3.0080 | <i>L. infantum</i> | 95  | 126  | 220  |
| LinJ07_V3.0080 | <i>L. infantum</i> | 76  | 465  | 540  |
| LinJ07_V3.0080 | <i>L. infantum</i> | 43  | 886  | 928  |
| LinJ07_V3.0090 | <i>L. infantum</i> | 56  | 122  | 177  |
| LinJ07_V3.0090 | <i>L. infantum</i> | 43  | 216  | 258  |
| LinJ07_V3.0090 | <i>L. infantum</i> | 76  | 306  | 381  |
| LinJ07_V3.0090 | <i>L. infantum</i> | 46  | 401  | 446  |
| LinJ07_V3.0090 | <i>L. infantum</i> | 91  | 545  | 635  |
| LinJ07_V3.0090 | <i>L. infantum</i> | 85  | 773  | 857  |
| LinJ07_V3.0090 | <i>L. infantum</i> | 80  | 1003 | 1082 |
| LinJ07_V3.0090 | <i>L. infantum</i> | 64  | 1117 | 1180 |
| LinJ07_V3.0090 | <i>L. infantum</i> | 41  | 1218 | 1258 |
| LinJ07_V3.0090 | <i>L. infantum</i> | 43  | 1352 | 1394 |
| LinJ07_V3.0090 | <i>L. infantum</i> | 50  | 1636 | 1685 |

|                |                    |     |      |      |
|----------------|--------------------|-----|------|------|
| LinJ07_V3.0090 | <i>L. infantum</i> | 81  | 1730 | 1810 |
| LinJ07_V3.0090 | <i>L. infantum</i> | 97  | 2263 | 2359 |
| LinJ07_V3.0090 | <i>L. infantum</i> | 116 | 2406 | 2521 |
| LinJ07_V3.0090 | <i>L. infantum</i> | 99  | 2675 | 2773 |
| LinJ07_V3.0090 | <i>L. infantum</i> | 51  | 2900 | 2950 |
| LinJ07_V3.0090 | <i>L. infantum</i> | 60  | 3021 | 3080 |
| LinJ07_V3.0090 | <i>L. infantum</i> | 45  | 3279 | 3323 |
| LinJ07_V3.0090 | <i>L. infantum</i> | 49  | 3423 | 3471 |
| LinJ07_V3.0090 | <i>L. infantum</i> | 50  | 3630 | 3679 |
| LinJ07_V3.0100 | <i>L. infantum</i> | 376 | 1    | 376  |
| LinJ07_V3.0100 | <i>L. infantum</i> | 50  | 463  | 512  |
| LinJ07_V3.0100 | <i>L. infantum</i> | 162 | 634  | 795  |
| LinJ07_V3.0120 | <i>L. infantum</i> | 274 | 242  | 515  |
| LinJ07_V3.0120 | <i>L. infantum</i> | 54  | 577  | 630  |
| LinJ07_V3.0130 | <i>L. infantum</i> | 75  | 1    | 75   |
| LinJ07_V3.0190 | <i>L. infantum</i> | 51  | 59   | 109  |
| LinJ07_V3.0210 | <i>L. infantum</i> | 49  | 69   | 117  |
| LinJ07_V3.0220 | <i>L. infantum</i> | 60  | 13   | 72   |
| LinJ07_V3.0230 | <i>L. infantum</i> | 56  | 399  | 454  |
| LinJ07_V3.0240 | <i>L. infantum</i> | 40  | 633  | 672  |
| LinJ07_V3.0250 | <i>L. infantum</i> | 73  | 322  | 394  |
| LinJ07_V3.0250 | <i>L. infantum</i> | 79  | 495  | 573  |
| LinJ07_V3.0250 | <i>L. infantum</i> | 79  | 495  | 573  |
| LinJ07_V3.0270 | <i>L. infantum</i> | 137 | 32   | 168  |
| LinJ07_V3.0270 | <i>L. infantum</i> | 69  | 648  | 716  |
| LinJ07_V3.0270 | <i>L. infantum</i> | 58  | 970  | 1027 |
| LinJ07_V3.0270 | <i>L. infantum</i> | 43  | 1479 | 1521 |
| LinJ07_V3.0270 | <i>L. infantum</i> | 40  | 1784 | 1823 |
| LinJ07_V3.0270 | <i>L. infantum</i> | 53  | 1983 | 2035 |
| LinJ07_V3.0270 | <i>L. infantum</i> | 94  | 2132 | 2225 |
| LinJ07_V3.0280 | <i>L. infantum</i> | 58  | 275  | 332  |
| LinJ07_V3.0290 | <i>L. infantum</i> | 47  | 180  | 226  |
| LinJ07_V3.0300 | <i>L. infantum</i> | 90  | 263  | 352  |
| LinJ07_V3.0310 | <i>L. infantum</i> | 57  | 20   | 76   |
| LinJ07_V3.0310 | <i>L. infantum</i> | 45  | 205  | 249  |
| LinJ07_V3.0310 | <i>L. infantum</i> | 87  | 503  | 589  |
| LinJ07_V3.0320 | <i>L. infantum</i> | 602 | 247  | 848  |
| LinJ07_V3.0330 | <i>L. infantum</i> | 123 | 196  | 318  |
| LinJ07_V3.0330 | <i>L. infantum</i> | 58  | 456  | 513  |
| LinJ07_V3.0330 | <i>L. infantum</i> | 213 | 538  | 750  |
| LinJ07_V3.0330 | <i>L. infantum</i> | 159 | 820  | 978  |
| LinJ07_V3.0340 | <i>L. infantum</i> | 43  | 1    | 43   |
| LinJ07_V3.0340 | <i>L. infantum</i> | 133 | 78   | 210  |
| LinJ07_V3.0340 | <i>L. infantum</i> | 166 | 230  | 395  |
| LinJ07_V3.0340 | <i>L. infantum</i> | 40  | 435  | 474  |
| LinJ07_V3.0340 | <i>L. infantum</i> | 69  | 495  | 563  |
| LinJ07_V3.0340 | <i>L. infantum</i> | 487 | 729  | 1215 |

|                |                    |     |      |      |
|----------------|--------------------|-----|------|------|
| LinJ07_V3.0340 | <i>L. infantum</i> | 63  | 1306 | 1368 |
| LinJ07_V3.0340 | <i>L. infantum</i> | 67  | 1375 | 1441 |
| LinJ07_V3.0340 | <i>L. infantum</i> | 46  | 1475 | 1520 |
| LinJ07_V3.0340 | <i>L. infantum</i> | 99  | 1591 | 1689 |
| LinJ07_V3.0340 | <i>L. infantum</i> | 78  | 1709 | 1786 |
| LinJ07_V3.0340 | <i>L. infantum</i> | 88  | 1859 | 1946 |
| LinJ07_V3.0340 | <i>L. infantum</i> | 47  | 1982 | 2028 |
| LinJ07_V3.0360 | <i>L. infantum</i> | 43  | 41   | 83   |
| LinJ07_V3.0360 | <i>L. infantum</i> | 69  | 204  | 272  |
| LinJ07_V3.0360 | <i>L. infantum</i> | 76  | 376  | 451  |
| LinJ07_V3.0370 | <i>L. infantum</i> | 41  | 1    | 41   |
| LinJ07_V3.0370 | <i>L. infantum</i> | 49  | 184  | 232  |
| LinJ07_V3.0370 | <i>L. infantum</i> | 49  | 184  | 232  |
| LinJ07_V3.0380 | <i>L. infantum</i> | 87  | 48   | 134  |
| LinJ07_V3.0380 | <i>L. infantum</i> | 52  | 176  | 227  |
| LinJ07_V3.0380 | <i>L. infantum</i> | 40  | 596  | 635  |
| LinJ07_V3.0390 | <i>L. infantum</i> | 91  | 1    | 91   |
| LinJ07_V3.0400 | <i>L. infantum</i> | 80  | 149  | 228  |
| LinJ07_V3.0400 | <i>L. infantum</i> | 115 | 373  | 487  |
| LinJ07_V3.0420 | <i>L. infantum</i> | 47  | 261  | 307  |
| LinJ07_V3.0440 | <i>L. infantum</i> | 99  | 1    | 99   |
| LinJ07_V3.0440 | <i>L. infantum</i> | 157 | 167  | 323  |
| LinJ07_V3.0440 | <i>L. infantum</i> | 53  | 341  | 393  |
| LinJ07_V3.0440 | <i>L. infantum</i> | 41  | 461  | 501  |
| LinJ07_V3.0440 | <i>L. infantum</i> | 149 | 633  | 781  |
| LinJ07_V3.0440 | <i>L. infantum</i> | 44  | 785  | 828  |
| LinJ07_V3.0440 | <i>L. infantum</i> | 51  | 874  | 924  |
| LinJ07_V3.0440 | <i>L. infantum</i> | 148 | 1118 | 1265 |
| LinJ07_V3.0440 | <i>L. infantum</i> | 61  | 1319 | 1379 |
| LinJ07_V3.0440 | <i>L. infantum</i> | 44  | 1460 | 1503 |
| LinJ07_V3.0440 | <i>L. infantum</i> | 96  | 1575 | 1670 |
| LinJ07_V3.0440 | <i>L. infantum</i> | 56  | 1792 | 1847 |
| LinJ07_V3.0440 | <i>L. infantum</i> | 167 | 1855 | 2021 |
| LinJ07_V3.0440 | <i>L. infantum</i> | 91  | 2093 | 2183 |
| LinJ07_V3.0440 | <i>L. infantum</i> | 125 | 2388 | 2512 |
| LinJ07_V3.0440 | <i>L. infantum</i> | 42  | 2628 | 2669 |
| LinJ07_V3.0440 | <i>L. infantum</i> | 248 | 2778 | 3025 |
| LinJ07_V3.0440 | <i>L. infantum</i> | 85  | 3051 | 3135 |
| LinJ07_V3.0440 | <i>L. infantum</i> | 92  | 3286 | 3377 |
| LinJ07_V3.0440 | <i>L. infantum</i> | 44  | 3438 | 3481 |
| LinJ07_V3.0440 | <i>L. infantum</i> | 49  | 3536 | 3584 |
| LinJ07_V3.0440 | <i>L. infantum</i> | 118 | 3662 | 3779 |
| LinJ07_V3.0440 | <i>L. infantum</i> | 82  | 3832 | 3913 |
| LinJ07_V3.0440 | <i>L. infantum</i> | 420 | 3933 | 4352 |
| LinJ07_V3.0440 | <i>L. infantum</i> | 187 | 4377 | 4563 |
| LinJ07_V3.0440 | <i>L. infantum</i> | 105 | 4569 | 4673 |
| LinJ07_V3.0440 | <i>L. infantum</i> | 92  | 4723 | 4814 |

|                |                    |     |      |      |
|----------------|--------------------|-----|------|------|
| LinJ07_V3.0440 | <i>L. infantum</i> | 151 | 4872 | 5022 |
| LinJ07_V3.0440 | <i>L. infantum</i> | 61  | 5096 | 5156 |
| LinJ07_V3.0440 | <i>L. infantum</i> | 49  | 5388 | 5436 |
| LinJ07_V3.0440 | <i>L. infantum</i> | 81  | 5604 | 5684 |
| LinJ07_V3.0450 | <i>L. infantum</i> | 45  | 34   | 78   |
| LinJ07_V3.0460 | <i>L. infantum</i> | 246 | 57   | 302  |
| LinJ07_V3.0460 | <i>L. infantum</i> | 58  | 431  | 488  |
| LinJ07_V3.0460 | <i>L. infantum</i> | 92  | 545  | 636  |
| LinJ07_V3.0460 | <i>L. infantum</i> | 40  | 811  | 850  |
| LinJ07_V3.0470 | <i>L. infantum</i> | 100 | 1    | 100  |
| LinJ07_V3.0470 | <i>L. infantum</i> | 60  | 238  | 297  |
| LinJ07_V3.0470 | <i>L. infantum</i> | 46  | 300  | 345  |
| LinJ07_V3.0470 | <i>L. infantum</i> | 56  | 393  | 448  |
| LinJ07_V3.0470 | <i>L. infantum</i> | 57  | 574  | 630  |
| LinJ07_V3.0470 | <i>L. infantum</i> | 84  | 655  | 738  |
| LinJ07_V3.0480 | <i>L. infantum</i> | 74  | 61   | 134  |
| LinJ07_V3.0480 | <i>L. infantum</i> | 48  | 512  | 559  |
| LinJ07_V3.0480 | <i>L. infantum</i> | 220 | 571  | 790  |
| LinJ07_V3.0480 | <i>L. infantum</i> | 79  | 817  | 895  |
| LinJ07_V3.0490 | <i>L. infantum</i> | 58  | 141  | 198  |
| LinJ07_V3.0490 | <i>L. infantum</i> | 83  | 260  | 342  |
| LinJ07_V3.0490 | <i>L. infantum</i> | 158 | 436  | 593  |
| LinJ07_V3.0500 | <i>L. infantum</i> | 60  | 1    | 60   |
| LinJ07_V3.0500 | <i>L. infantum</i> | 76  | 73   | 148  |
| LinJ07_V3.0500 | <i>L. infantum</i> | 72  | 181  | 252  |
| LinJ07_V3.0500 | <i>L. infantum</i> | 53  | 435  | 487  |
| LinJ07_V3.0500 | <i>L. infantum</i> | 52  | 559  | 610  |
| LinJ07_V3.0500 | <i>L. infantum</i> | 56  | 690  | 745  |
| LinJ07_V3.0500 | <i>L. infantum</i> | 125 | 747  | 871  |
| LinJ07_V3.0510 | <i>L. infantum</i> | 43  | 199  | 241  |
| LinJ07_V3.0530 | <i>L. infantum</i> | 47  | 2280 | 2326 |
| LinJ07_V3.0530 | <i>L. infantum</i> | 61  | 2350 | 2410 |
| LinJ07_V3.0530 | <i>L. infantum</i> | 41  | 2420 | 2460 |
| LinJ07_V3.0530 | <i>L. infantum</i> | 41  | 2597 | 2637 |
| LinJ07_V3.0530 | <i>L. infantum</i> | 47  | 2687 | 2733 |
| LinJ07_V3.0530 | <i>L. infantum</i> | 94  | 2793 | 2886 |
| LinJ07_V3.0530 | <i>L. infantum</i> | 73  | 3586 | 3658 |
| LinJ07_V3.0530 | <i>L. infantum</i> | 78  | 3695 | 3772 |
| LinJ07_V3.0530 | <i>L. infantum</i> | 49  | 3981 | 4029 |
| LinJ07_V3.0530 | <i>L. infantum</i> | 40  | 4110 | 4149 |
| LinJ07_V3.0530 | <i>L. infantum</i> | 82  | 4191 | 4272 |
| LinJ07_V3.0530 | <i>L. infantum</i> | 79  | 4392 | 4470 |
| LinJ07_V3.0530 | <i>L. infantum</i> | 50  | 4517 | 4566 |
| LinJ07_V3.0530 | <i>L. infantum</i> | 57  | 4698 | 4754 |
| LinJ07_V3.0540 | <i>L. infantum</i> | 53  | 1    | 53   |
| LinJ07_V3.0540 | <i>L. infantum</i> | 89  | 98   | 186  |
| LinJ07_V3.0540 | <i>L. infantum</i> | 91  | 194  | 284  |

|                |                    |     |      |      |
|----------------|--------------------|-----|------|------|
| LinJ07_V3.0550 | <i>L. infantum</i> | 63  | 156  | 218  |
| LinJ07_V3.0560 | <i>L. infantum</i> | 76  | 20   | 95   |
| LinJ07_V3.0560 | <i>L. infantum</i> | 63  | 141  | 203  |
| LinJ07_V3.0560 | <i>L. infantum</i> | 63  | 141  | 203  |
| LinJ07_V3.0570 | <i>L. infantum</i> | 145 | 28   | 172  |
| LinJ07_V3.0580 | <i>L. infantum</i> | 68  | 1    | 68   |
| LinJ07_V3.0590 | <i>L. infantum</i> | 93  | 1    | 93   |
| LinJ07_V3.0590 | <i>L. infantum</i> | 386 | 131  | 516  |
| LinJ07_V3.0590 | <i>L. infantum</i> | 78  | 591  | 668  |
| LinJ07_V3.0590 | <i>L. infantum</i> | 245 | 671  | 915  |
| LinJ07_V3.0600 | <i>L. infantum</i> | 385 | 27   | 411  |
| LinJ07_V3.0600 | <i>L. infantum</i> | 60  | 448  | 507  |
| LinJ07_V3.0600 | <i>L. infantum</i> | 97  | 541  | 637  |
| LinJ07_V3.0600 | <i>L. infantum</i> | 164 | 706  | 869  |
| LinJ07_V3.0600 | <i>L. infantum</i> | 67  | 900  | 966  |
| LinJ07_V3.0600 | <i>L. infantum</i> | 112 | 983  | 1094 |
| LinJ07_V3.0600 | <i>L. infantum</i> | 45  | 1224 | 1268 |
| LinJ07_V3.0600 | <i>L. infantum</i> | 76  | 1310 | 1385 |
| LinJ07_V3.0600 | <i>L. infantum</i> | 64  | 1417 | 1480 |
| LinJ07_V3.0600 | <i>L. infantum</i> | 80  | 1562 | 1641 |
| LinJ07_V3.0600 | <i>L. infantum</i> | 201 | 1655 | 1855 |
| LinJ07_V3.0610 | <i>L. infantum</i> | 57  | 169  | 225  |
| LinJ07_V3.0620 | <i>L. infantum</i> | 138 | 1    | 138  |
| LinJ07_V3.0620 | <i>L. infantum</i> | 242 | 225  | 466  |
| LinJ07_V3.0630 | <i>L. infantum</i> | 164 | 57   | 220  |
| LinJ07_V3.0630 | <i>L. infantum</i> | 449 | 236  | 684  |
| LinJ07_V3.0630 | <i>L. infantum</i> | 94  | 754  | 847  |
| LinJ07_V3.0630 | <i>L. infantum</i> | 64  | 896  | 959  |
| LinJ07_V3.0630 | <i>L. infantum</i> | 101 | 1148 | 1248 |
| LinJ07_V3.0630 | <i>L. infantum</i> | 93  | 1278 | 1370 |
| LinJ07_V3.0640 | <i>L. infantum</i> | 556 | 225  | 780  |
| LinJ07_V3.0650 | <i>L. infantum</i> | 50  | 49   | 98   |
| LinJ07_V3.0650 | <i>L. infantum</i> | 84  | 326  | 409  |
| LinJ07_V3.0650 | <i>L. infantum</i> | 54  | 716  | 769  |
| LinJ07_V3.0670 | <i>L. infantum</i> | 96  | 100  | 195  |
| LinJ07_V3.0680 | <i>L. infantum</i> | 52  | 113  | 164  |
| LinJ07_V3.0680 | <i>L. infantum</i> | 42  | 191  | 232  |
| LinJ07_V3.0680 | <i>L. infantum</i> | 42  | 191  | 232  |
| LinJ07_V3.0690 | <i>L. infantum</i> | 135 | 1    | 135  |
| LinJ07_V3.0690 | <i>L. infantum</i> | 139 | 156  | 294  |
| LinJ07_V3.0690 | <i>L. infantum</i> | 226 | 330  | 555  |
| LinJ07_V3.0690 | <i>L. infantum</i> | 80  | 557  | 636  |
| LinJ07_V3.0700 | <i>L. infantum</i> | 48  | 1    | 48   |
| LinJ07_V3.0700 | <i>L. infantum</i> | 43  | 431  | 473  |
| LinJ07_V3.0700 | <i>L. infantum</i> | 43  | 431  | 473  |
| LinJ07_V3.0740 | <i>L. infantum</i> | 100 | 22   | 121  |
| LinJ07_V3.0750 | <i>L. infantum</i> | 111 | 1    | 111  |



|                |                    |     |      |      |
|----------------|--------------------|-----|------|------|
| LinJ07_V3.0770 | <i>L. infantum</i> | 259 | 1    | 259  |
| LinJ07_V3.0770 | <i>L. infantum</i> | 104 | 288  | 391  |
| LinJ07_V3.0770 | <i>L. infantum</i> | 399 | 405  | 803  |
| LinJ07_V3.0770 | <i>L. infantum</i> | 352 | 833  | 1184 |
| LinJ07_V3.0770 | <i>L. infantum</i> | 179 | 1295 | 1473 |
| LinJ07_V3.0770 | <i>L. infantum</i> | 41  | 1521 | 1561 |
| LinJ07_V3.0770 | <i>L. infantum</i> | 139 | 1663 | 1801 |
| LinJ07_V3.0780 | <i>L. infantum</i> | 99  | 1    | 99   |
| LinJ07_V3.0780 | <i>L. infantum</i> | 209 | 111  | 319  |
| LinJ07_V3.0780 | <i>L. infantum</i> | 56  | 325  | 380  |
| LinJ07_V3.0780 | <i>L. infantum</i> | 57  | 705  | 761  |
| LinJ07_V3.0780 | <i>L. infantum</i> | 111 | 807  | 917  |
| LinJ07_V3.0790 | <i>L. infantum</i> | 40  | 1    | 40   |
| LinJ07_V3.0800 | <i>L. infantum</i> | 138 | 15   | 152  |
| LinJ07_V3.0800 | <i>L. infantum</i> | 244 | 161  | 404  |
| LinJ07_V3.0800 | <i>L. infantum</i> | 176 | 406  | 581  |
| LinJ07_V3.0810 | <i>L. infantum</i> | 96  | 861  | 956  |
| LinJ07_V3.0810 | <i>L. infantum</i> | 45  | 1217 | 1261 |
| LinJ07_V3.0820 | <i>L. infantum</i> | 97  | 1    | 97   |
| LinJ07_V3.0820 | <i>L. infantum</i> | 53  | 306  | 358  |
| LinJ07_V3.0820 | <i>L. infantum</i> | 58  | 631  | 688  |
| LinJ07_V3.0830 | <i>L. infantum</i> | 109 | 1    | 109  |
| LinJ07_V3.0830 | <i>L. infantum</i> | 59  | 223  | 281  |
| LinJ07_V3.0830 | <i>L. infantum</i> | 103 | 357  | 459  |
| LinJ07_V3.0830 | <i>L. infantum</i> | 89  | 870  | 958  |
| LinJ07_V3.0830 | <i>L. infantum</i> | 77  | 1024 | 1100 |
| LinJ07_V3.0830 | <i>L. infantum</i> | 53  | 1140 | 1192 |
| LinJ07_V3.0830 | <i>L. infantum</i> | 48  | 1336 | 1383 |
| LinJ07_V3.0830 | <i>L. infantum</i> | 50  | 1443 | 1492 |
| LinJ07_V3.0830 | <i>L. infantum</i> | 157 | 1605 | 1761 |
| LinJ07_V3.0830 | <i>L. infantum</i> | 47  | 1844 | 1890 |
| LinJ07_V3.0830 | <i>L. infantum</i> | 105 | 1997 | 2101 |
| LinJ07_V3.0830 | <i>L. infantum</i> | 43  | 2148 | 2190 |
| LinJ07_V3.0830 | <i>L. infantum</i> | 68  | 2245 | 2312 |
| LinJ07_V3.0830 | <i>L. infantum</i> | 40  | 2420 | 2459 |
| LinJ07_V3.0830 | <i>L. infantum</i> | 65  | 2537 | 2601 |
| LinJ07_V3.0830 | <i>L. infantum</i> | 123 | 2611 | 2733 |
| LinJ07_V3.0830 | <i>L. infantum</i> | 49  | 2779 | 2827 |
| LinJ07_V3.0830 | <i>L. infantum</i> | 120 | 2938 | 3057 |
| LinJ07_V3.0830 | <i>L. infantum</i> | 93  | 3122 | 3214 |
| LinJ07_V3.0830 | <i>L. infantum</i> | 52  | 3236 | 3287 |
| LinJ07_V3.0830 | <i>L. infantum</i> | 49  | 3321 | 3369 |
| LinJ07_V3.0830 | <i>L. infantum</i> | 312 | 3494 | 3805 |
| LinJ07_V3.0840 | <i>L. infantum</i> | 150 | 1    | 150  |
| LinJ07_V3.0860 | <i>L. infantum</i> | 176 | 48   | 223  |
| LinJ07_V3.0870 | <i>L. infantum</i> | 68  | 1    | 68   |
| LinJ07_V3.0870 | <i>L. infantum</i> | 57  | 109  | 165  |

|                |                    |      |      |      |
|----------------|--------------------|------|------|------|
| LinJ07_V3.0870 | <i>L. infantum</i> | 143  | 257  | 399  |
| LinJ07_V3.0870 | <i>L. infantum</i> | 286  | 459  | 744  |
| LinJ07_V3.0870 | <i>L. infantum</i> | 72   | 855  | 926  |
| LinJ07_V3.0870 | <i>L. infantum</i> | 60   | 1004 | 1063 |
| LinJ07_V3.0880 | <i>L. infantum</i> | 130  | 1    | 130  |
| LinJ07_V3.0880 | <i>L. infantum</i> | 141  | 192  | 332  |
| LinJ07_V3.0890 | <i>L. infantum</i> | 83   | 69   | 151  |
| LinJ07_V3.0890 | <i>L. infantum</i> | 132  | 180  | 311  |
| LinJ07_V3.0890 | <i>L. infantum</i> | 192  | 358  | 549  |
| LinJ07_V3.0900 | <i>L. infantum</i> | 79   | 1    | 79   |
| LinJ07_V3.0900 | <i>L. infantum</i> | 167  | 108  | 274  |
| LinJ07_V3.0910 | <i>L. infantum</i> | 54   | 279  | 332  |
| LinJ07_V3.0910 | <i>L. infantum</i> | 42   | 452  | 493  |
| LinJ07_V3.0910 | <i>L. infantum</i> | 42   | 452  | 493  |
| LinJ07_V3.0920 | <i>L. infantum</i> | 130  | 71   | 200  |
| LinJ07_V3.0920 | <i>L. infantum</i> | 113  | 240  | 352  |
| LinJ07_V3.0950 | <i>L. infantum</i> | 59   | 437  | 495  |
| LinJ07_V3.0950 | <i>L. infantum</i> | 49   | 532  | 580  |
| LinJ07_V3.0950 | <i>L. infantum</i> | 65   | 736  | 800  |
| LinJ07_V3.0970 | <i>L. infantum</i> | 47   | 425  | 471  |
| LinJ07_V3.0980 | <i>L. infantum</i> | 64   | 16   | 79   |
| LinJ07_V3.0980 | <i>L. infantum</i> | 358  | 81   | 438  |
| LinJ07_V3.0990 | <i>L. infantum</i> | 49   | 1410 | 1458 |
| LinJ07_V3.0990 | <i>L. infantum</i> | 510  | 1831 | 2340 |
| LinJ07_V3.1000 | <i>L. infantum</i> | 53   | 1    | 53   |
| LinJ07_V3.1010 | <i>L. infantum</i> | 1173 | 23   | 1195 |
| LinJ07_V3.1010 | <i>L. infantum</i> | 126  | 1218 | 1343 |
| LinJ07_V3.1010 | <i>L. infantum</i> | 101  | 1375 | 1475 |
| LinJ07_V3.1020 | <i>L. infantum</i> | 83   | 1    | 83   |
| LinJ07_V3.1020 | <i>L. infantum</i> | 41   | 145  | 185  |
| LinJ07_V3.1020 | <i>L. infantum</i> | 125  | 251  | 375  |
| LinJ07_V3.1040 | <i>L. infantum</i> | 586  | 1    | 586  |
| LinJ07_V3.1040 | <i>L. infantum</i> | 55   | 778  | 832  |
| LinJ07_V3.1040 | <i>L. infantum</i> | 64   | 906  | 969  |
| LinJ07_V3.1040 | <i>L. infantum</i> | 111  | 1228 | 1338 |
| LinJ07_V3.1040 | <i>L. infantum</i> | 76   | 1375 | 1450 |
| LinJ07_V3.1040 | <i>L. infantum</i> | 152  | 1676 | 1827 |
| LinJ07_V3.1050 | <i>L. infantum</i> | 108  | 29   | 136  |
| LinJ07_V3.1050 | <i>L. infantum</i> | 502  | 138  | 639  |
| LinJ07_V3.1050 | <i>L. infantum</i> | 126  | 653  | 778  |
| LinJ07_V3.1050 | <i>L. infantum</i> | 84   | 890  | 973  |
| LinJ07_V3.1050 | <i>L. infantum</i> | 50   | 977  | 1026 |
| LinJ07_V3.1050 | <i>L. infantum</i> | 41   | 1176 | 1216 |
| LinJ07_V3.1050 | <i>L. infantum</i> | 43   | 1314 | 1356 |
| LinJ07_V3.1060 | <i>L. infantum</i> | 635  | 1    | 635  |
| LinJ07_V3.1070 | <i>L. infantum</i> | 250  | 46   | 295  |
| LinJ07_V3.1070 | <i>L. infantum</i> | 83   | 418  | 500  |

|                |                    |     |      |      |
|----------------|--------------------|-----|------|------|
| LinJ07_V3.1070 | <i>L. infantum</i> | 90  | 630  | 719  |
| LinJ07_V3.1070 | <i>L. infantum</i> | 92  | 915  | 1006 |
| LinJ07_V3.1070 | <i>L. infantum</i> | 140 | 1054 | 1193 |
| LinJ07_V3.1070 | <i>L. infantum</i> | 103 | 1232 | 1334 |
| LinJ07_V3.1070 | <i>L. infantum</i> | 45  | 1346 | 1390 |
| LinJ07_V3.1070 | <i>L. infantum</i> | 91  | 1435 | 1525 |
| LinJ07_V3.1070 | <i>L. infantum</i> | 88  | 1587 | 1674 |
| LinJ07_V3.1070 | <i>L. infantum</i> | 285 | 1732 | 2016 |
| LinJ07_V3.1080 | <i>L. infantum</i> | 80  | 110  | 189  |
| LinJ07_V3.1100 | <i>L. infantum</i> | 125 | 1    | 125  |
| LinJ07_V3.1100 | <i>L. infantum</i> | 376 | 199  | 574  |
| LinJ07_V3.1100 | <i>L. infantum</i> | 133 | 582  | 714  |
| LinJ07_V3.1100 | <i>L. infantum</i> | 76  | 738  | 813  |
| LinJ07_V3.1100 | <i>L. infantum</i> | 144 | 912  | 1055 |
| LinJ07_V3.1100 | <i>L. infantum</i> | 131 | 1182 | 1312 |
| LinJ07_V3.1100 | <i>L. infantum</i> | 78  | 1345 | 1422 |
| LinJ07_V3.1100 | <i>L. infantum</i> | 221 | 1673 | 1893 |
| LinJ07_V3.1110 | <i>L. infantum</i> | 733 | 1    | 733  |
| LinJ07_V3.1120 | <i>L. infantum</i> | 63  | 45   | 107  |
| LinJ07_V3.1120 | <i>L. infantum</i> | 116 | 203  | 318  |
| LinJ07_V3.1120 | <i>L. infantum</i> | 140 | 670  | 809  |
| LinJ07_V3.1140 | <i>L. infantum</i> | 116 | 88   | 203  |
| LinJ07_V3.1150 | <i>L. infantum</i> | 266 | 99   | 364  |
| LinJ07_V3.1160 | <i>L. infantum</i> | 44  | 1    | 44   |
| LinJ07_V3.1170 | <i>L. infantum</i> | 260 | 1    | 260  |
| LinJ07_V3.1170 | <i>L. infantum</i> | 60  | 475  | 534  |
| LinJ07_V3.1170 | <i>L. infantum</i> | 134 | 815  | 948  |
| LinJ07_V3.1180 | <i>L. infantum</i> | 61  | 12   | 72   |
| LinJ07_V3.1200 | <i>L. infantum</i> | 41  | 1    | 41   |
| LinJ07_V3.1210 | <i>L. infantum</i> | 123 | 871  | 993  |
| LinJ07_V3.1220 | <i>L. infantum</i> | 46  | 1    | 46   |
| LinJ07_V3.1240 | <i>L. infantum</i> | 128 | 89   | 216  |
| LinJ07_V3.1240 | <i>L. infantum</i> | 85  | 237  | 321  |
| LinJ07_V3.1250 | <i>L. infantum</i> | 231 | 307  | 537  |
| LinJ07_V3.1270 | <i>L. infantum</i> | 83  | 1    | 83   |
| LinJ07_V3.1270 | <i>L. infantum</i> | 146 | 159  | 304  |
| LinJ07_V3.1290 | <i>L. infantum</i> | 75  | 230  | 304  |
| LinJ07_V3.1300 | <i>L. infantum</i> | 158 | 188  | 345  |
| LinJ07_V3.1330 | <i>L. infantum</i> | 146 | 41   | 186  |
| LinJ07_V3.1330 | <i>L. infantum</i> | 66  | 1094 | 1159 |
| LinJ07_V3.1330 | <i>L. infantum</i> | 51  | 1273 | 1323 |
| LinJ07_V3.1330 | <i>L. infantum</i> | 42  | 1425 | 1466 |
| LinJ07_V3.1330 | <i>L. infantum</i> | 53  | 1550 | 1602 |
| LinJ07_V3.1340 | <i>L. infantum</i> | 77  | 1    | 77   |
| LinJ08_V3.0010 | <i>L. infantum</i> | 116 | 176  | 291  |
| LinJ08_V3.0010 | <i>L. infantum</i> | 202 | 303  | 504  |
| LinJ08_V3.0010 | <i>L. infantum</i> | 166 | 674  | 839  |

|                |                    |     |     |      |
|----------------|--------------------|-----|-----|------|
| LinJ08_V3.0010 | <i>L. infantum</i> | 84  | 854 | 937  |
| LinJ08_V3.0040 | <i>L. infantum</i> | 83  | 45  | 127  |
| LinJ08_V3.0070 | <i>L. infantum</i> | 79  | 72  | 150  |
| LinJ08_V3.0070 | <i>L. infantum</i> | 81  | 200 | 280  |
| LinJ08_V3.0070 | <i>L. infantum</i> | 173 | 296 | 468  |
| LinJ08_V3.0080 | <i>L. infantum</i> | 162 | 418 | 579  |
| LinJ08_V3.0090 | <i>L. infantum</i> | 56  | 545 | 600  |
| LinJ08_V3.0090 | <i>L. infantum</i> | 193 | 664 | 856  |
| LinJ08_V3.0090 | <i>L. infantum</i> | 193 | 664 | 856  |
| LinJ08_V3.0100 | <i>L. infantum</i> | 47  | 1   | 47   |
| LinJ08_V3.0100 | <i>L. infantum</i> | 78  | 254 | 331  |
| LinJ08_V3.0100 | <i>L. infantum</i> | 72  | 380 | 451  |
| LinJ08_V3.0110 | <i>L. infantum</i> | 220 | 53  | 272  |
| LinJ08_V3.0110 | <i>L. infantum</i> | 266 | 378 | 643  |
| LinJ08_V3.0120 | <i>L. infantum</i> | 46  | 197 | 242  |
| LinJ08_V3.0130 | <i>L. infantum</i> | 59  | 20  | 78   |
| LinJ08_V3.0130 | <i>L. infantum</i> | 185 | 137 | 321  |
| LinJ08_V3.0130 | <i>L. infantum</i> | 812 | 339 | 1150 |
| LinJ08_V3.0140 | <i>L. infantum</i> | 138 | 212 | 349  |
| LinJ08_V3.0150 | <i>L. infantum</i> | 85  | 303 | 387  |
| LinJ08_V3.0150 | <i>L. infantum</i> | 61  | 523 | 583  |
| LinJ08_V3.0150 | <i>L. infantum</i> | 232 | 686 | 917  |
| LinJ08_V3.0150 | <i>L. infantum</i> | 61  | 958 | 1018 |
| LinJ08_V3.0160 | <i>L. infantum</i> | 71  | 1   | 71   |
| LinJ08_V3.0160 | <i>L. infantum</i> | 66  | 130 | 195  |
| LinJ08_V3.0160 | <i>L. infantum</i> | 48  | 263 | 310  |
| LinJ08_V3.0160 | <i>L. infantum</i> | 56  | 444 | 499  |
| LinJ08_V3.0170 | <i>L. infantum</i> | 82  | 21  | 102  |
| LinJ08_V3.0180 | <i>L. infantum</i> | 54  | 1   | 54   |
| LinJ08_V3.0180 | <i>L. infantum</i> | 108 | 237 | 344  |
| LinJ08_V3.0180 | <i>L. infantum</i> | 108 | 237 | 344  |
| LinJ08_V3.0190 | <i>L. infantum</i> | 60  | 235 | 294  |
| LinJ08_V3.0210 | <i>L. infantum</i> | 58  | 538 | 595  |
| LinJ08_V3.0220 | <i>L. infantum</i> | 157 | 1   | 157  |
| LinJ08_V3.0220 | <i>L. infantum</i> | 234 | 162 | 395  |
| LinJ08_V3.0220 | <i>L. infantum</i> | 59  | 413 | 471  |
| LinJ08_V3.0230 | <i>L. infantum</i> | 40  | 24  | 63   |
| LinJ08_V3.0230 | <i>L. infantum</i> | 116 | 70  | 185  |
| LinJ08_V3.0230 | <i>L. infantum</i> | 114 | 478 | 591  |
| LinJ08_V3.0230 | <i>L. infantum</i> | 75  | 731 | 805  |
| LinJ08_V3.0230 | <i>L. infantum</i> | 98  | 987 | 1084 |
| LinJ08_V3.0250 | <i>L. infantum</i> | 46  | 1   | 46   |
| LinJ08_V3.0250 | <i>L. infantum</i> | 50  | 213 | 262  |
| LinJ08_V3.0250 | <i>L. infantum</i> | 50  | 213 | 262  |
| LinJ08_V3.0260 | <i>L. infantum</i> | 73  | 1   | 73   |
| LinJ08_V3.0260 | <i>L. infantum</i> | 41  | 77  | 117  |
| LinJ08_V3.0270 | <i>L. infantum</i> | 438 | 1   | 438  |

|                |                    |     |      |      |
|----------------|--------------------|-----|------|------|
| LinJ08_V3.0280 | <i>L. infantum</i> | 144 | 1    | 144  |
| LinJ08_V3.0280 | <i>L. infantum</i> | 58  | 229  | 286  |
| LinJ08_V3.0280 | <i>L. infantum</i> | 64  | 353  | 416  |
| LinJ08_V3.0280 | <i>L. infantum</i> | 158 | 418  | 575  |
| LinJ08_V3.0280 | <i>L. infantum</i> | 161 | 587  | 747  |
| LinJ08_V3.0290 | <i>L. infantum</i> | 41  | 285  | 325  |
| LinJ08_V3.0320 | <i>L. infantum</i> | 52  | 12   | 63   |
| LinJ08_V3.0320 | <i>L. infantum</i> | 54  | 256  | 309  |
| LinJ08_V3.0320 | <i>L. infantum</i> | 54  | 256  | 309  |
| LinJ08_V3.0350 | <i>L. infantum</i> | 147 | 1    | 147  |
| LinJ08_V3.0350 | <i>L. infantum</i> | 40  | 426  | 465  |
| LinJ08_V3.0350 | <i>L. infantum</i> | 55  | 544  | 598  |
| LinJ08_V3.0350 | <i>L. infantum</i> | 80  | 652  | 731  |
| LinJ08_V3.0350 | <i>L. infantum</i> | 66  | 815  | 880  |
| LinJ08_V3.0350 | <i>L. infantum</i> | 41  | 1139 | 1179 |
| LinJ08_V3.0350 | <i>L. infantum</i> | 82  | 1218 | 1299 |
| LinJ08_V3.0350 | <i>L. infantum</i> | 44  | 1307 | 1350 |
| LinJ08_V3.0350 | <i>L. infantum</i> | 131 | 1383 | 1513 |
| LinJ08_V3.0350 | <i>L. infantum</i> | 46  | 1744 | 1789 |
| LinJ08_V3.0350 | <i>L. infantum</i> | 91  | 1852 | 1942 |
| LinJ08_V3.0350 | <i>L. infantum</i> | 63  | 2157 | 2219 |
| LinJ08_V3.0350 | <i>L. infantum</i> | 74  | 2302 | 2375 |
| LinJ08_V3.0350 | <i>L. infantum</i> | 50  | 2443 | 2492 |
| LinJ08_V3.0350 | <i>L. infantum</i> | 41  | 2582 | 2622 |
| LinJ08_V3.0350 | <i>L. infantum</i> | 172 | 2633 | 2804 |
| LinJ08_V3.0350 | <i>L. infantum</i> | 87  | 3036 | 3122 |
| LinJ08_V3.0350 | <i>L. infantum</i> | 78  | 3170 | 3247 |
| LinJ08_V3.0350 | <i>L. infantum</i> | 138 | 3269 | 3406 |
| LinJ08_V3.0350 | <i>L. infantum</i> | 46  | 3455 | 3500 |
| LinJ08_V3.0350 | <i>L. infantum</i> | 126 | 3618 | 3743 |
| LinJ08_V3.0350 | <i>L. infantum</i> | 57  | 4183 | 4239 |
| LinJ08_V3.0350 | <i>L. infantum</i> | 48  | 4248 | 4295 |
| LinJ08_V3.0350 | <i>L. infantum</i> | 58  | 4380 | 4437 |
| LinJ08_V3.0350 | <i>L. infantum</i> | 80  | 4472 | 4551 |
| LinJ08_V3.0350 | <i>L. infantum</i> | 136 | 4635 | 4770 |
| LinJ08_V3.0360 | <i>L. infantum</i> | 87  | 1    | 87   |
| LinJ08_V3.0360 | <i>L. infantum</i> | 59  | 96   | 154  |
| LinJ08_V3.0360 | <i>L. infantum</i> | 786 | 194  | 979  |
| LinJ08_V3.0360 | <i>L. infantum</i> | 139 | 1079 | 1217 |
| LinJ08_V3.0370 | <i>L. infantum</i> | 142 | 52   | 193  |
| LinJ08_V3.0370 | <i>L. infantum</i> | 159 | 251  | 409  |
| LinJ08_V3.0370 | <i>L. infantum</i> | 68  | 416  | 483  |
| LinJ08_V3.0380 | <i>L. infantum</i> | 108 | 1    | 108  |
| LinJ08_V3.0400 | <i>L. infantum</i> | 73  | 16   | 88   |
| LinJ08_V3.0400 | <i>L. infantum</i> | 372 | 107  | 478  |
| LinJ08_V3.0400 | <i>L. infantum</i> | 108 | 502  | 609  |
| LinJ08_V3.0400 | <i>L. infantum</i> | 154 | 644  | 797  |

|                |                    |     |      |      |
|----------------|--------------------|-----|------|------|
| LinJ08_V3.0400 | <i>L. infantum</i> | 138 | 826  | 963  |
| LinJ08_V3.0400 | <i>L. infantum</i> | 111 | 1033 | 1143 |
| LinJ08_V3.0400 | <i>L. infantum</i> | 58  | 1270 | 1327 |
| LinJ08_V3.0400 | <i>L. infantum</i> | 96  | 1336 | 1431 |
| LinJ08_V3.0400 | <i>L. infantum</i> | 76  | 1437 | 1512 |
| LinJ08_V3.0400 | <i>L. infantum</i> | 347 | 1540 | 1886 |
| LinJ08_V3.0420 | <i>L. infantum</i> | 45  | 21   | 65   |
| LinJ08_V3.0420 | <i>L. infantum</i> | 69  | 161  | 229  |
| LinJ08_V3.0420 | <i>L. infantum</i> | 52  | 354  | 405  |
| LinJ08_V3.0420 | <i>L. infantum</i> | 40  | 976  | 1015 |
| LinJ08_V3.0430 | <i>L. infantum</i> | 172 | 1    | 172  |
| LinJ08_V3.0430 | <i>L. infantum</i> | 118 | 424  | 541  |
| LinJ08_V3.0430 | <i>L. infantum</i> | 280 | 558  | 837  |
| LinJ08_V3.0430 | <i>L. infantum</i> | 148 | 840  | 987  |
| LinJ08_V3.0430 | <i>L. infantum</i> | 57  | 1086 | 1142 |
| LinJ08_V3.0430 | <i>L. infantum</i> | 198 | 1493 | 1690 |
| LinJ08_V3.0430 | <i>L. infantum</i> | 106 | 1879 | 1984 |
| LinJ08_V3.0440 | <i>L. infantum</i> | 196 | 81   | 276  |
| LinJ08_V3.0440 | <i>L. infantum</i> | 68  | 329  | 396  |
| LinJ08_V3.0440 | <i>L. infantum</i> | 91  | 399  | 489  |
| LinJ08_V3.0440 | <i>L. infantum</i> | 87  | 516  | 602  |
| LinJ08_V3.0440 | <i>L. infantum</i> | 142 | 637  | 778  |
| LinJ08_V3.0450 | <i>L. infantum</i> | 44  | 157  | 200  |
| LinJ08_V3.0450 | <i>L. infantum</i> | 46  | 236  | 281  |
| LinJ08_V3.0450 | <i>L. infantum</i> | 186 | 460  | 645  |
| LinJ08_V3.0450 | <i>L. infantum</i> | 62  | 756  | 817  |
| LinJ08_V3.0450 | <i>L. infantum</i> | 102 | 926  | 1027 |
| LinJ08_V3.0450 | <i>L. infantum</i> | 77  | 1423 | 1499 |
| LinJ08_V3.0450 | <i>L. infantum</i> | 62  | 1634 | 1695 |
| LinJ08_V3.0450 | <i>L. infantum</i> | 69  | 1755 | 1823 |
| LinJ08_V3.0450 | <i>L. infantum</i> | 63  | 2207 | 2269 |
| LinJ08_V3.0450 | <i>L. infantum</i> | 48  | 2363 | 2410 |
| LinJ08_V3.0490 | <i>L. infantum</i> | 42  | 75   | 116  |
| LinJ08_V3.0490 | <i>L. infantum</i> | 111 | 172  | 282  |
| LinJ08_V3.0490 | <i>L. infantum</i> | 111 | 172  | 282  |
| LinJ08_V3.0500 | <i>L. infantum</i> | 238 | 1    | 238  |
| LinJ08_V3.0510 | <i>L. infantum</i> | 103 | 1    | 103  |
| LinJ08_V3.0510 | <i>L. infantum</i> | 82  | 105  | 186  |
| LinJ08_V3.0510 | <i>L. infantum</i> | 126 | 205  | 330  |
| LinJ08_V3.0520 | <i>L. infantum</i> | 68  | 63   | 130  |
| LinJ08_V3.0520 | <i>L. infantum</i> | 74  | 567  | 640  |
| LinJ08_V3.0520 | <i>L. infantum</i> | 59  | 653  | 711  |
| LinJ08_V3.0530 | <i>L. infantum</i> | 87  | 351  | 437  |
| LinJ08_V3.0530 | <i>L. infantum</i> | 109 | 523  | 631  |
| LinJ08_V3.0530 | <i>L. infantum</i> | 57  | 662  | 718  |
| LinJ08_V3.0530 | <i>L. infantum</i> | 54  | 916  | 969  |
| LinJ08_V3.0530 | <i>L. infantum</i> | 77  | 1026 | 1102 |

|                |                    |      |      |      |
|----------------|--------------------|------|------|------|
| LinJ08_V3.0530 | <i>L. infantum</i> | 126  | 1138 | 1263 |
| LinJ08_V3.0530 | <i>L. infantum</i> | 76   | 1298 | 1373 |
| LinJ08_V3.0530 | <i>L. infantum</i> | 59   | 1511 | 1569 |
| LinJ08_V3.0530 | <i>L. infantum</i> | 63   | 1587 | 1649 |
| LinJ08_V3.0530 | <i>L. infantum</i> | 132  | 1758 | 1889 |
| LinJ08_V3.0530 | <i>L. infantum</i> | 152  | 1906 | 2057 |
| LinJ08_V3.0530 | <i>L. infantum</i> | 47   | 2090 | 2136 |
| LinJ08_V3.0530 | <i>L. infantum</i> | 43   | 2169 | 2211 |
| LinJ08_V3.0530 | <i>L. infantum</i> | 60   | 2269 | 2328 |
| LinJ08_V3.0540 | <i>L. infantum</i> | 128  | 1    | 128  |
| LinJ08_V3.0540 | <i>L. infantum</i> | 210  | 199  | 408  |
| LinJ08_V3.0540 | <i>L. infantum</i> | 645  | 497  | 1141 |
| LinJ08_V3.0540 | <i>L. infantum</i> | 309  | 1159 | 1467 |
| LinJ08_V3.0540 | <i>L. infantum</i> | 192  | 1470 | 1661 |
| LinJ08_V3.0540 | <i>L. infantum</i> | 115  | 1678 | 1792 |
| LinJ08_V3.0540 | <i>L. infantum</i> | 56   | 1807 | 1862 |
| LinJ08_V3.0550 | <i>L. infantum</i> | 66   | 49   | 114  |
| LinJ08_V3.0550 | <i>L. infantum</i> | 64   | 125  | 188  |
| LinJ08_V3.0550 | <i>L. infantum</i> | 85   | 268  | 352  |
| LinJ08_V3.0560 | <i>L. infantum</i> | 48   | 1    | 48   |
| LinJ08_V3.0560 | <i>L. infantum</i> | 44   | 50   | 93   |
| LinJ08_V3.0560 | <i>L. infantum</i> | 44   | 50   | 93   |
| LinJ08_V3.0570 | <i>L. infantum</i> | 210  | 1    | 210  |
| LinJ08_V3.0580 | <i>L. infantum</i> | 42   | 1    | 42   |
| LinJ08_V3.0580 | <i>L. infantum</i> | 53   | 92   | 144  |
| LinJ08_V3.0580 | <i>L. infantum</i> | 53   | 92   | 144  |
| LinJ08_V3.0590 | <i>L. infantum</i> | 63   | 117  | 179  |
| LinJ08_V3.0600 | <i>L. infantum</i> | 60   | 89   | 148  |
| LinJ08_V3.0610 | <i>L. infantum</i> | 292  | 69   | 360  |
| LinJ08_V3.0610 | <i>L. infantum</i> | 111  | 406  | 516  |
| LinJ08_V3.0620 | <i>L. infantum</i> | 52   | 92   | 143  |
| LinJ08_V3.0630 | <i>L. infantum</i> | 119  | 66   | 184  |
| LinJ08_V3.0630 | <i>L. infantum</i> | 48   | 200  | 247  |
| LinJ08_V3.0630 | <i>L. infantum</i> | 151  | 305  | 455  |
| LinJ08_V3.0630 | <i>L. infantum</i> | 253  | 475  | 727  |
| LinJ08_V3.0630 | <i>L. infantum</i> | 71   | 904  | 974  |
| LinJ08_V3.0630 | <i>L. infantum</i> | 95   | 1054 | 1148 |
| LinJ08_V3.0630 | <i>L. infantum</i> | 57   | 1177 | 1233 |
| LinJ08_V3.0630 | <i>L. infantum</i> | 1525 | 1312 | 2836 |
| LinJ08_V3.0640 | <i>L. infantum</i> | 120  | 178  | 297  |
| LinJ08_V3.0640 | <i>L. infantum</i> | 40   | 320  | 359  |
| LinJ08_V3.0640 | <i>L. infantum</i> | 150  | 388  | 537  |
| LinJ08_V3.0640 | <i>L. infantum</i> | 421  | 692  | 1112 |
| LinJ08_V3.0640 | <i>L. infantum</i> | 43   | 1425 | 1467 |
| LinJ08_V3.0640 | <i>L. infantum</i> | 337  | 1546 | 1882 |
| LinJ08_V3.0640 | <i>L. infantum</i> | 251  | 1921 | 2171 |
| LinJ08_V3.0660 | <i>L. infantum</i> | 224  | 60   | 283  |

|                |                    |     |      |      |
|----------------|--------------------|-----|------|------|
| LinJ08_V3.0670 | <i>L. infantum</i> | 62  | 1    | 62   |
| LinJ08_V3.0670 | <i>L. infantum</i> | 48  | 586  | 633  |
| LinJ08_V3.0670 | <i>L. infantum</i> | 72  | 921  | 992  |
| LinJ08_V3.0740 | <i>L. infantum</i> | 54  | 1    | 54   |
| LinJ08_V3.0740 | <i>L. infantum</i> | 43  | 224  | 266  |
| LinJ08_V3.0740 | <i>L. infantum</i> | 43  | 224  | 266  |
| LinJ08_V3.0750 | <i>L. infantum</i> | 76  | 168  | 243  |
| LinJ08_V3.0750 | <i>L. infantum</i> | 93  | 250  | 342  |
| LinJ08_V3.0750 | <i>L. infantum</i> | 93  | 250  | 342  |
| LinJ08_V3.0800 | <i>L. infantum</i> | 290 | 1    | 290  |
| LinJ08_V3.0810 | <i>L. infantum</i> | 62  | 73   | 134  |
| LinJ08_V3.0810 | <i>L. infantum</i> | 47  | 184  | 230  |
| LinJ08_V3.0810 | <i>L. infantum</i> | 111 | 309  | 419  |
| LinJ08_V3.0820 | <i>L. infantum</i> | 60  | 77   | 136  |
| LinJ08_V3.0820 | <i>L. infantum</i> | 58  | 269  | 326  |
| LinJ08_V3.0820 | <i>L. infantum</i> | 49  | 400  | 448  |
| LinJ08_V3.0830 | <i>L. infantum</i> | 58  | 39   | 96   |
| LinJ08_V3.0830 | <i>L. infantum</i> | 44  | 333  | 376  |
| LinJ08_V3.0830 | <i>L. infantum</i> | 44  | 333  | 376  |
| LinJ08_V3.0840 | <i>L. infantum</i> | 645 | 36   | 680  |
| LinJ08_V3.0840 | <i>L. infantum</i> | 252 | 701  | 952  |
| LinJ08_V3.0840 | <i>L. infantum</i> | 46  | 1003 | 1048 |
| LinJ08_V3.0840 | <i>L. infantum</i> | 85  | 1379 | 1463 |
| LinJ08_V3.0850 | <i>L. infantum</i> | 128 | 27   | 154  |
| LinJ08_V3.0850 | <i>L. infantum</i> | 80  | 260  | 339  |
| LinJ08_V3.0850 | <i>L. infantum</i> | 114 | 401  | 514  |
| LinJ08_V3.0850 | <i>L. infantum</i> | 59  | 547  | 605  |
| LinJ08_V3.0850 | <i>L. infantum</i> | 47  | 623  | 669  |
| LinJ08_V3.0850 | <i>L. infantum</i> | 54  | 697  | 750  |
| LinJ08_V3.0850 | <i>L. infantum</i> | 101 | 808  | 908  |
| LinJ08_V3.0850 | <i>L. infantum</i> | 59  | 955  | 1013 |
| LinJ08_V3.0850 | <i>L. infantum</i> | 190 | 1031 | 1220 |
| LinJ08_V3.0850 | <i>L. infantum</i> | 175 | 1268 | 1442 |
| LinJ08_V3.0850 | <i>L. infantum</i> | 95  | 1536 | 1630 |
| LinJ08_V3.0850 | <i>L. infantum</i> | 42  | 1632 | 1673 |
| LinJ08_V3.0850 | <i>L. infantum</i> | 68  | 1716 | 1783 |
| LinJ08_V3.0850 | <i>L. infantum</i> | 56  | 1801 | 1856 |
| LinJ08_V3.0850 | <i>L. infantum</i> | 96  | 1922 | 2017 |
| LinJ08_V3.0850 | <i>L. infantum</i> | 73  | 2049 | 2121 |
| LinJ08_V3.0860 | <i>L. infantum</i> | 47  | 158  | 204  |
| LinJ08_V3.0870 | <i>L. infantum</i> | 317 | 1    | 317  |
| LinJ08_V3.0870 | <i>L. infantum</i> | 136 | 422  | 557  |
| LinJ08_V3.0880 | <i>L. infantum</i> | 116 | 121  | 236  |
| LinJ08_V3.0890 | <i>L. infantum</i> | 146 | 1    | 146  |
| LinJ08_V3.0900 | <i>L. infantum</i> | 152 | 42   | 193  |
| LinJ08_V3.0900 | <i>L. infantum</i> | 47  | 196  | 242  |
| LinJ08_V3.0900 | <i>L. infantum</i> | 44  | 318  | 361  |



|                |                    |     |      |      |
|----------------|--------------------|-----|------|------|
| LinJ08_V3.0900 | <i>L. infantum</i> | 55  | 379  | 433  |
| LinJ08_V3.0900 | <i>L. infantum</i> | 50  | 470  | 519  |
| LinJ08_V3.0910 | <i>L. infantum</i> | 359 | 26   | 384  |
| LinJ08_V3.0910 | <i>L. infantum</i> | 213 | 438  | 650  |
| LinJ08_V3.0910 | <i>L. infantum</i> | 58  | 776  | 833  |
| LinJ08_V3.0920 | <i>L. infantum</i> | 95  | 1    | 95   |
| LinJ08_V3.0920 | <i>L. infantum</i> | 926 | 115  | 1040 |
| LinJ08_V3.0930 | <i>L. infantum</i> | 51  | 86   | 136  |
| LinJ08_V3.0930 | <i>L. infantum</i> | 117 | 210  | 326  |
| LinJ08_V3.0930 | <i>L. infantum</i> | 117 | 210  | 326  |
| LinJ08_V3.0960 | <i>L. infantum</i> | 67  | 339  | 405  |
| LinJ08_V3.1000 | <i>L. infantum</i> | 58  | 1    | 58   |
| LinJ08_V3.1000 | <i>L. infantum</i> | 66  | 561  | 626  |
| LinJ08_V3.1010 | <i>L. infantum</i> | 45  | 54   | 98   |
| LinJ08_V3.1010 | <i>L. infantum</i> | 69  | 297  | 365  |
| LinJ08_V3.1010 | <i>L. infantum</i> | 69  | 297  | 365  |
| LinJ08_V3.1020 | <i>L. infantum</i> | 60  | 184  | 243  |
| LinJ08_V3.1020 | <i>L. infantum</i> | 43  | 334  | 376  |
| LinJ08_V3.1020 | <i>L. infantum</i> | 53  | 469  | 521  |
| LinJ08_V3.1030 | <i>L. infantum</i> | 62  | 42   | 103  |
| LinJ08_V3.1030 | <i>L. infantum</i> | 57  | 426  | 482  |
| LinJ08_V3.1030 | <i>L. infantum</i> | 46  | 709  | 754  |
| LinJ08_V3.1050 | <i>L. infantum</i> | 328 | 381  | 708  |
| LinJ08_V3.1050 | <i>L. infantum</i> | 62  | 733  | 794  |
| LinJ08_V3.1060 | <i>L. infantum</i> | 57  | 221  | 277  |
| LinJ08_V3.1060 | <i>L. infantum</i> | 127 | 469  | 595  |
| LinJ08_V3.1060 | <i>L. infantum</i> | 145 | 631  | 775  |
| LinJ08_V3.1070 | <i>L. infantum</i> | 88  | 126  | 213  |
| LinJ08_V3.1090 | <i>L. infantum</i> | 45  | 106  | 150  |
| LinJ08_V3.1090 | <i>L. infantum</i> | 104 | 265  | 368  |
| LinJ08_V3.1090 | <i>L. infantum</i> | 104 | 265  | 368  |
| LinJ08_V3.1100 | <i>L. infantum</i> | 94  | 1060 | 1153 |
| LinJ08_V3.1120 | <i>L. infantum</i> | 75  | 135  | 209  |
| LinJ08_V3.1120 | <i>L. infantum</i> | 48  | 233  | 280  |
| LinJ08_V3.1130 | <i>L. infantum</i> | 50  | 118  | 167  |
| LinJ08_V3.1130 | <i>L. infantum</i> | 101 | 169  | 269  |
| LinJ08_V3.1130 | <i>L. infantum</i> | 151 | 356  | 506  |
| LinJ08_V3.1160 | <i>L. infantum</i> | 255 | 1    | 255  |
| LinJ08_V3.1160 | <i>L. infantum</i> | 122 | 352  | 473  |
| LinJ08_V3.1250 | <i>L. infantum</i> | 89  | 193  | 281  |
| LinJ08_V3.1250 | <i>L. infantum</i> | 44  | 506  | 549  |
| LinJ08_V3.1250 | <i>L. infantum</i> | 44  | 506  | 549  |
| LinJ08_V3.1280 | <i>L. infantum</i> | 40  | 404  | 443  |
| LinJ08_V3.1290 | <i>L. infantum</i> | 40  | 404  | 443  |
| LinJ08_V3.1300 | <i>L. infantum</i> | 60  | 42   | 101  |
| LinJ08_V3.1300 | <i>L. infantum</i> | 156 | 313  | 468  |
| LinJ08_V3.1310 | <i>L. infantum</i> | 189 | 51   | 239  |

|                |                    |     |      |      |
|----------------|--------------------|-----|------|------|
| LinJ09_V3.0010 | <i>L. infantum</i> | 67  | 1    | 67   |
| LinJ09_V3.0040 | <i>L. infantum</i> | 85  | 479  | 563  |
| LinJ09_V3.0050 | <i>L. infantum</i> | 55  | 196  | 250  |
| LinJ09_V3.0080 | <i>L. infantum</i> | 46  | 86   | 131  |
| LinJ09_V3.0090 | <i>L. infantum</i> | 125 | 209  | 333  |
| LinJ09_V3.0090 | <i>L. infantum</i> | 43  | 527  | 569  |
| LinJ09_V3.0090 | <i>L. infantum</i> | 43  | 527  | 569  |
| LinJ09_V3.0100 | <i>L. infantum</i> | 78  | 107  | 184  |
| LinJ09_V3.0110 | <i>L. infantum</i> | 62  | 38   | 99   |
| LinJ09_V3.0110 | <i>L. infantum</i> | 90  | 178  | 267  |
| LinJ09_V3.0110 | <i>L. infantum</i> | 90  | 178  | 267  |
| LinJ09_V3.0120 | <i>L. infantum</i> | 87  | 92   | 178  |
| LinJ09_V3.0120 | <i>L. infantum</i> | 322 | 261  | 582  |
| LinJ09_V3.0130 | <i>L. infantum</i> | 77  | 1    | 77   |
| LinJ09_V3.0140 | <i>L. infantum</i> | 225 | 26   | 250  |
| LinJ09_V3.0140 | <i>L. infantum</i> | 205 | 265  | 469  |
| LinJ09_V3.0140 | <i>L. infantum</i> | 203 | 509  | 711  |
| LinJ09_V3.0150 | <i>L. infantum</i> | 44  | 174  | 217  |
| LinJ09_V3.0150 | <i>L. infantum</i> | 40  | 286  | 325  |
| LinJ09_V3.0150 | <i>L. infantum</i> | 134 | 440  | 573  |
| LinJ09_V3.0150 | <i>L. infantum</i> | 240 | 637  | 876  |
| LinJ09_V3.0150 | <i>L. infantum</i> | 165 | 920  | 1084 |
| LinJ09_V3.0160 | <i>L. infantum</i> | 64  | 244  | 307  |
| LinJ09_V3.0160 | <i>L. infantum</i> | 43  | 321  | 363  |
| LinJ09_V3.0160 | <i>L. infantum</i> | 43  | 321  | 363  |
| LinJ09_V3.0230 | <i>L. infantum</i> | 78  | 52   | 129  |
| LinJ09_V3.0230 | <i>L. infantum</i> | 107 | 171  | 277  |
| LinJ09_V3.0230 | <i>L. infantum</i> | 107 | 171  | 277  |
| LinJ09_V3.0240 | <i>L. infantum</i> | 72  | 133  | 204  |
| LinJ09_V3.0240 | <i>L. infantum</i> | 183 | 257  | 439  |
| LinJ09_V3.0240 | <i>L. infantum</i> | 42  | 476  | 517  |
| LinJ09_V3.0240 | <i>L. infantum</i> | 119 | 603  | 721  |
| LinJ09_V3.0250 | <i>L. infantum</i> | 78  | 1    | 78   |
| LinJ09_V3.0250 | <i>L. infantum</i> | 128 | 243  | 370  |
| LinJ09_V3.0250 | <i>L. infantum</i> | 192 | 428  | 619  |
| LinJ09_V3.0250 | <i>L. infantum</i> | 488 | 656  | 1143 |
| LinJ09_V3.0250 | <i>L. infantum</i> | 72  | 1185 | 1256 |
| LinJ09_V3.0260 | <i>L. infantum</i> | 58  | 54   | 111  |
| LinJ09_V3.0260 | <i>L. infantum</i> | 74  | 132  | 205  |
| LinJ09_V3.0260 | <i>L. infantum</i> | 74  | 132  | 205  |
| LinJ09_V3.0270 | <i>L. infantum</i> | 45  | 1    | 45   |
| LinJ09_V3.0270 | <i>L. infantum</i> | 42  | 290  | 331  |
| LinJ09_V3.0270 | <i>L. infantum</i> | 42  | 290  | 331  |
| LinJ09_V3.0280 | <i>L. infantum</i> | 68  | 1    | 68   |
| LinJ09_V3.0280 | <i>L. infantum</i> | 95  | 678  | 772  |
| LinJ09_V3.0290 | <i>L. infantum</i> | 175 | 534  | 708  |
| LinJ09_V3.0300 | <i>L. infantum</i> | 227 | 515  | 741  |

|                |                    |     |      |      |
|----------------|--------------------|-----|------|------|
| LinJ09_V3.0300 | <i>L. infantum</i> | 94  | 767  | 860  |
| LinJ09_V3.0310 | <i>L. infantum</i> | 47  | 1    | 47   |
| LinJ09_V3.0310 | <i>L. infantum</i> | 60  | 109  | 168  |
| LinJ09_V3.0310 | <i>L. infantum</i> | 62  | 190  | 251  |
| LinJ09_V3.0320 | <i>L. infantum</i> | 611 | 1    | 611  |
| LinJ09_V3.0320 | <i>L. infantum</i> | 173 | 661  | 833  |
| LinJ09_V3.0330 | <i>L. infantum</i> | 126 | 1    | 126  |
| LinJ09_V3.0330 | <i>L. infantum</i> | 45  | 179  | 223  |
| LinJ09_V3.0340 | <i>L. infantum</i> | 82  | 1    | 82   |
| LinJ09_V3.0360 | <i>L. infantum</i> | 88  | 1    | 88   |
| LinJ09_V3.0380 | <i>L. infantum</i> | 59  | 169  | 227  |
| LinJ09_V3.0390 | <i>L. infantum</i> | 166 | 1    | 166  |
| LinJ09_V3.0390 | <i>L. infantum</i> | 124 | 278  | 401  |
| LinJ09_V3.0390 | <i>L. infantum</i> | 71  | 753  | 823  |
| LinJ09_V3.0400 | <i>L. infantum</i> | 72  | 609  | 680  |
| LinJ09_V3.0410 | <i>L. infantum</i> | 109 | 1    | 109  |
| LinJ09_V3.0420 | <i>L. infantum</i> | 72  | 273  | 344  |
| LinJ09_V3.0420 | <i>L. infantum</i> | 63  | 559  | 621  |
| LinJ09_V3.0420 | <i>L. infantum</i> | 63  | 559  | 621  |
| LinJ09_V3.0440 | <i>L. infantum</i> | 46  | 1    | 46   |
| LinJ09_V3.0440 | <i>L. infantum</i> | 290 | 76   | 365  |
| LinJ09_V3.0440 | <i>L. infantum</i> | 221 | 497  | 717  |
| LinJ09_V3.0440 | <i>L. infantum</i> | 67  | 749  | 815  |
| LinJ09_V3.0440 | <i>L. infantum</i> | 61  | 923  | 983  |
| LinJ09_V3.0440 | <i>L. infantum</i> | 118 | 1036 | 1153 |
| LinJ09_V3.0440 | <i>L. infantum</i> | 160 | 1162 | 1321 |
| LinJ09_V3.0440 | <i>L. infantum</i> | 48  | 1464 | 1511 |
| LinJ09_V3.0440 | <i>L. infantum</i> | 182 | 1572 | 1753 |
| LinJ09_V3.0440 | <i>L. infantum</i> | 81  | 1835 | 1915 |
| LinJ09_V3.0450 | <i>L. infantum</i> | 105 | 1    | 105  |
| LinJ09_V3.0460 | <i>L. infantum</i> | 92  | 25   | 116  |
| LinJ09_V3.0470 | <i>L. infantum</i> | 79  | 1    | 79   |
| LinJ09_V3.0470 | <i>L. infantum</i> | 62  | 223  | 284  |
| LinJ09_V3.0470 | <i>L. infantum</i> | 88  | 477  | 564  |
| LinJ09_V3.0470 | <i>L. infantum</i> | 130 | 642  | 771  |
| LinJ09_V3.0470 | <i>L. infantum</i> | 92  | 777  | 868  |
| LinJ09_V3.0470 | <i>L. infantum</i> | 241 | 893  | 1133 |
| LinJ09_V3.0480 | <i>L. infantum</i> | 237 | 138  | 374  |
| LinJ09_V3.0490 | <i>L. infantum</i> | 71  | 112  | 182  |
| LinJ09_V3.0490 | <i>L. infantum</i> | 43  | 251  | 293  |
| LinJ09_V3.0490 | <i>L. infantum</i> | 43  | 251  | 293  |
| LinJ09_V3.0500 | <i>L. infantum</i> | 103 | 110  | 212  |
| LinJ09_V3.0500 | <i>L. infantum</i> | 258 | 280  | 537  |
| LinJ09_V3.0500 | <i>L. infantum</i> | 59  | 571  | 629  |
| LinJ09_V3.0500 | <i>L. infantum</i> | 75  | 642  | 716  |
| LinJ09_V3.0500 | <i>L. infantum</i> | 68  | 748  | 815  |
| LinJ09_V3.0500 | <i>L. infantum</i> | 104 | 831  | 934  |

|                |                    |     |      |      |
|----------------|--------------------|-----|------|------|
| LinJ09_V3.0520 | <i>L. infantum</i> | 114 | 1    | 114  |
| LinJ09_V3.0520 | <i>L. infantum</i> | 113 | 139  | 251  |
| LinJ09_V3.0530 | <i>L. infantum</i> | 55  | 39   | 93   |
| LinJ09_V3.0530 | <i>L. infantum</i> | 289 | 298  | 586  |
| LinJ09_V3.0550 | <i>L. infantum</i> | 75  | 1    | 75   |
| LinJ09_V3.0550 | <i>L. infantum</i> | 68  | 208  | 275  |
| LinJ09_V3.0550 | <i>L. infantum</i> | 51  | 314  | 364  |
| LinJ09_V3.0550 | <i>L. infantum</i> | 75  | 391  | 465  |
| LinJ09_V3.0550 | <i>L. infantum</i> | 92  | 478  | 569  |
| LinJ09_V3.0550 | <i>L. infantum</i> | 100 | 922  | 1021 |
| LinJ09_V3.0550 | <i>L. infantum</i> | 54  | 1100 | 1153 |
| LinJ09_V3.0550 | <i>L. infantum</i> | 43  | 1207 | 1249 |
| LinJ09_V3.0550 | <i>L. infantum</i> | 220 | 1286 | 1505 |
| LinJ09_V3.0560 | <i>L. infantum</i> | 153 | 165  | 317  |
| LinJ09_V3.0570 | <i>L. infantum</i> | 50  | 73   | 122  |
| LinJ09_V3.0570 | <i>L. infantum</i> | 65  | 164  | 228  |
| LinJ09_V3.0570 | <i>L. infantum</i> | 98  | 600  | 697  |
| LinJ09_V3.0570 | <i>L. infantum</i> | 61  | 710  | 770  |
| LinJ09_V3.0580 | <i>L. infantum</i> | 125 | 1    | 125  |
| LinJ09_V3.0580 | <i>L. infantum</i> | 48  | 131  | 178  |
| LinJ09_V3.0580 | <i>L. infantum</i> | 58  | 480  | 537  |
| LinJ09_V3.0580 | <i>L. infantum</i> | 247 | 751  | 997  |
| LinJ09_V3.0590 | <i>L. infantum</i> | 64  | 1    | 64   |
| LinJ09_V3.0590 | <i>L. infantum</i> | 419 | 86   | 504  |
| LinJ09_V3.0590 | <i>L. infantum</i> | 249 | 515  | 763  |
| LinJ09_V3.0590 | <i>L. infantum</i> | 183 | 818  | 1000 |
| LinJ09_V3.0590 | <i>L. infantum</i> | 52  | 1058 | 1109 |
| LinJ09_V3.0600 | <i>L. infantum</i> | 89  | 42   | 130  |
| LinJ09_V3.0600 | <i>L. infantum</i> | 121 | 137  | 257  |
| LinJ09_V3.0600 | <i>L. infantum</i> | 79  | 267  | 345  |
| LinJ09_V3.0610 | <i>L. infantum</i> | 45  | 133  | 177  |
| LinJ09_V3.0620 | <i>L. infantum</i> | 75  | 85   | 159  |
| LinJ09_V3.0620 | <i>L. infantum</i> | 139 | 211  | 349  |
| LinJ09_V3.0640 | <i>L. infantum</i> | 220 | 596  | 815  |
| LinJ09_V3.0650 | <i>L. infantum</i> | 48  | 288  | 335  |
| LinJ09_V3.0660 | <i>L. infantum</i> | 88  | 1    | 88   |
| LinJ09_V3.0660 | <i>L. infantum</i> | 136 | 159  | 294  |
| LinJ09_V3.0660 | <i>L. infantum</i> | 49  | 813  | 861  |
| LinJ09_V3.0670 | <i>L. infantum</i> | 88  | 1    | 88   |
| LinJ09_V3.0670 | <i>L. infantum</i> | 115 | 125  | 239  |
| LinJ09_V3.0670 | <i>L. infantum</i> | 65  | 383  | 447  |
| LinJ09_V3.0670 | <i>L. infantum</i> | 43  | 522  | 564  |
| LinJ09_V3.0680 | <i>L. infantum</i> | 108 | 53   | 160  |
| LinJ09_V3.0680 | <i>L. infantum</i> | 42  | 206  | 247  |
| LinJ09_V3.0680 | <i>L. infantum</i> | 62  | 343  | 404  |
| LinJ09_V3.0680 | <i>L. infantum</i> | 157 | 537  | 693  |
| LinJ09_V3.0680 | <i>L. infantum</i> | 279 | 697  | 975  |

|                |                    |     |      |      |
|----------------|--------------------|-----|------|------|
| LinJ09_V3.0690 | <i>L. infantum</i> | 52  | 141  | 192  |
| LinJ09_V3.0690 | <i>L. infantum</i> | 56  | 408  | 463  |
| LinJ09_V3.0690 | <i>L. infantum</i> | 56  | 408  | 463  |
| LinJ09_V3.0700 | <i>L. infantum</i> | 79  | 474  | 552  |
| LinJ09_V3.0710 | <i>L. infantum</i> | 68  | 1    | 68   |
| LinJ09_V3.0720 | <i>L. infantum</i> | 48  | 1    | 48   |
| LinJ09_V3.0720 | <i>L. infantum</i> | 44  | 95   | 138  |
| LinJ09_V3.0730 | <i>L. infantum</i> | 72  | 59   | 130  |
| LinJ09_V3.0730 | <i>L. infantum</i> | 45  | 182  | 226  |
| LinJ09_V3.0730 | <i>L. infantum</i> | 81  | 258  | 338  |
| LinJ09_V3.0750 | <i>L. infantum</i> | 86  | 1    | 86   |
| LinJ09_V3.0750 | <i>L. infantum</i> | 88  | 107  | 194  |
| LinJ09_V3.0750 | <i>L. infantum</i> | 236 | 280  | 515  |
| LinJ09_V3.0760 | <i>L. infantum</i> | 84  | 1    | 84   |
| LinJ09_V3.0760 | <i>L. infantum</i> | 48  | 105  | 152  |
| LinJ09_V3.0760 | <i>L. infantum</i> | 102 | 217  | 318  |
| LinJ09_V3.0760 | <i>L. infantum</i> | 59  | 338  | 396  |
| LinJ09_V3.0760 | <i>L. infantum</i> | 52  | 428  | 479  |
| LinJ09_V3.0770 | <i>L. infantum</i> | 48  | 1    | 48   |
| LinJ09_V3.0770 | <i>L. infantum</i> | 129 | 208  | 336  |
| LinJ09_V3.0780 | <i>L. infantum</i> | 155 | 415  | 569  |
| LinJ09_V3.0790 | <i>L. infantum</i> | 45  | 279  | 323  |
| LinJ09_V3.0790 | <i>L. infantum</i> | 65  | 894  | 958  |
| LinJ09_V3.0790 | <i>L. infantum</i> | 41  | 1049 | 1089 |
| LinJ09_V3.0790 | <i>L. infantum</i> | 45  | 1245 | 1289 |
| LinJ09_V3.0790 | <i>L. infantum</i> | 56  | 1335 | 1390 |
| LinJ09_V3.0790 | <i>L. infantum</i> | 83  | 1544 | 1626 |
| LinJ09_V3.0790 | <i>L. infantum</i> | 44  | 1735 | 1778 |
| LinJ09_V3.0800 | <i>L. infantum</i> | 53  | 216  | 268  |
| LinJ09_V3.0800 | <i>L. infantum</i> | 53  | 429  | 481  |
| LinJ09_V3.0800 | <i>L. infantum</i> | 75  | 787  | 861  |
| LinJ09_V3.0810 | <i>L. infantum</i> | 73  | 24   | 96   |
| LinJ09_V3.0810 | <i>L. infantum</i> | 104 | 116  | 219  |
| LinJ09_V3.0810 | <i>L. infantum</i> | 78  | 273  | 350  |
| LinJ09_V3.0810 | <i>L. infantum</i> | 86  | 689  | 774  |
| LinJ09_V3.0810 | <i>L. infantum</i> | 107 | 813  | 919  |
| LinJ09_V3.0810 | <i>L. infantum</i> | 65  | 949  | 1013 |
| LinJ09_V3.0810 | <i>L. infantum</i> | 57  | 1227 | 1283 |
| LinJ09_V3.0810 | <i>L. infantum</i> | 96  | 1386 | 1481 |
| LinJ09_V3.0810 | <i>L. infantum</i> | 57  | 1570 | 1626 |
| LinJ09_V3.0810 | <i>L. infantum</i> | 65  | 1736 | 1800 |
| LinJ09_V3.0810 | <i>L. infantum</i> | 42  | 1816 | 1857 |
| LinJ09_V3.0810 | <i>L. infantum</i> | 75  | 1996 | 2070 |
| LinJ09_V3.0810 | <i>L. infantum</i> | 65  | 2181 | 2245 |
| LinJ09_V3.0810 | <i>L. infantum</i> | 65  | 2257 | 2321 |
| LinJ09_V3.0810 | <i>L. infantum</i> | 82  | 2352 | 2433 |
| LinJ09_V3.0810 | <i>L. infantum</i> | 52  | 2519 | 2570 |

|                |                    |     |      |      |
|----------------|--------------------|-----|------|------|
| LinJ09_V3.0810 | <i>L. infantum</i> | 75  | 2626 | 2700 |
| LinJ09_V3.0810 | <i>L. infantum</i> | 50  | 2785 | 2834 |
| LinJ09_V3.0810 | <i>L. infantum</i> | 57  | 2968 | 3024 |
| LinJ09_V3.0810 | <i>L. infantum</i> | 49  | 3105 | 3153 |
| LinJ09_V3.0810 | <i>L. infantum</i> | 88  | 3213 | 3300 |
| LinJ09_V3.0810 | <i>L. infantum</i> | 64  | 3579 | 3642 |
| LinJ09_V3.0810 | <i>L. infantum</i> | 79  | 3720 | 3798 |
| LinJ09_V3.0810 | <i>L. infantum</i> | 78  | 3821 | 3898 |
| LinJ09_V3.0810 | <i>L. infantum</i> | 44  | 3943 | 3986 |
| LinJ09_V3.0810 | <i>L. infantum</i> | 40  | 4160 | 4199 |
| LinJ09_V3.0810 | <i>L. infantum</i> | 74  | 4221 | 4294 |
| LinJ09_V3.0810 | <i>L. infantum</i> | 44  | 4483 | 4526 |
| LinJ09_V3.0810 | <i>L. infantum</i> | 93  | 4538 | 4630 |
| LinJ09_V3.0810 | <i>L. infantum</i> | 60  | 4688 | 4747 |
| LinJ09_V3.0810 | <i>L. infantum</i> | 78  | 4869 | 4946 |
| LinJ09_V3.0810 | <i>L. infantum</i> | 99  | 4965 | 5063 |
| LinJ09_V3.0810 | <i>L. infantum</i> | 261 | 5102 | 5362 |
| LinJ09_V3.0810 | <i>L. infantum</i> | 56  | 5405 | 5460 |
| LinJ09_V3.0840 | <i>L. infantum</i> | 79  | 1    | 79   |
| LinJ09_V3.0840 | <i>L. infantum</i> | 143 | 96   | 238  |
| LinJ09_V3.0840 | <i>L. infantum</i> | 96  | 244  | 339  |
| LinJ09_V3.0840 | <i>L. infantum</i> | 68  | 377  | 444  |
| LinJ09_V3.0840 | <i>L. infantum</i> | 70  | 469  | 538  |
| LinJ09_V3.0840 | <i>L. infantum</i> | 72  | 1079 | 1150 |
| LinJ09_V3.0850 | <i>L. infantum</i> | 193 | 10   | 202  |
| LinJ09_V3.0850 | <i>L. infantum</i> | 180 | 310  | 489  |
| LinJ09_V3.0850 | <i>L. infantum</i> | 78  | 526  | 603  |
| LinJ09_V3.0850 | <i>L. infantum</i> | 306 | 681  | 986  |
| LinJ09_V3.0850 | <i>L. infantum</i> | 212 | 1030 | 1241 |
| LinJ09_V3.0860 | <i>L. infantum</i> | 44  | 83   | 126  |
| LinJ09_V3.0870 | <i>L. infantum</i> | 41  | 24   | 64   |
| LinJ09_V3.0870 | <i>L. infantum</i> | 88  | 257  | 344  |
| LinJ09_V3.0870 | <i>L. infantum</i> | 42  | 489  | 530  |
| LinJ09_V3.0880 | <i>L. infantum</i> | 51  | 1    | 51   |
| LinJ09_V3.0880 | <i>L. infantum</i> | 60  | 410  | 469  |
| LinJ09_V3.0880 | <i>L. infantum</i> | 57  | 720  | 776  |
| LinJ09_V3.0900 | <i>L. infantum</i> | 78  | 153  | 230  |
| LinJ09_V3.0920 | <i>L. infantum</i> | 83  | 1    | 83   |
| LinJ09_V3.0920 | <i>L. infantum</i> | 74  | 104  | 177  |
| LinJ09_V3.0920 | <i>L. infantum</i> | 63  | 191  | 253  |
| LinJ09_V3.0920 | <i>L. infantum</i> | 165 | 255  | 419  |
| LinJ09_V3.0930 | <i>L. infantum</i> | 76  | 1    | 76   |
| LinJ09_V3.0930 | <i>L. infantum</i> | 375 | 116  | 490  |
| LinJ09_V3.0940 | <i>L. infantum</i> | 131 | 163  | 293  |
| LinJ09_V3.0940 | <i>L. infantum</i> | 310 | 425  | 734  |
| LinJ09_V3.0940 | <i>L. infantum</i> | 130 | 995  | 1124 |
| LinJ09_V3.0940 | <i>L. infantum</i> | 99  | 1217 | 1315 |

|                |                    |     |      |      |
|----------------|--------------------|-----|------|------|
| LinJ09_V3.0940 | <i>L. infantum</i> | 64  | 1341 | 1404 |
| LinJ09_V3.0940 | <i>L. infantum</i> | 63  | 1440 | 1502 |
| LinJ09_V3.0940 | <i>L. infantum</i> | 223 | 1586 | 1808 |
| LinJ09_V3.0940 | <i>L. infantum</i> | 88  | 1975 | 2062 |
| LinJ09_V3.0940 | <i>L. infantum</i> | 64  | 2465 | 2528 |
| LinJ09_V3.0960 | <i>L. infantum</i> | 62  | 105  | 166  |
| LinJ09_V3.0970 | <i>L. infantum</i> | 89  | 1    | 89   |
| LinJ09_V3.0980 | <i>L. infantum</i> | 89  | 1    | 89   |
| LinJ09_V3.0990 | <i>L. infantum</i> | 50  | 526  | 575  |
| LinJ09_V3.0990 | <i>L. infantum</i> | 355 | 737  | 1091 |
| LinJ09_V3.0990 | <i>L. infantum</i> | 65  | 1139 | 1203 |
| LinJ09_V3.1000 | <i>L. infantum</i> | 53  | 159  | 211  |
| LinJ09_V3.1000 | <i>L. infantum</i> | 42  | 246  | 287  |
| LinJ09_V3.1000 | <i>L. infantum</i> | 40  | 445  | 484  |
| LinJ09_V3.1010 | <i>L. infantum</i> | 46  | 33   | 78   |
| LinJ09_V3.1010 | <i>L. infantum</i> | 57  | 170  | 226  |
| LinJ09_V3.1010 | <i>L. infantum</i> | 83  | 458  | 540  |
| LinJ09_V3.1020 | <i>L. infantum</i> | 53  | 1    | 53   |
| LinJ09_V3.1020 | <i>L. infantum</i> | 60  | 252  | 311  |
| LinJ09_V3.1020 | <i>L. infantum</i> | 60  | 252  | 311  |
| LinJ09_V3.1030 | <i>L. infantum</i> | 60  | 204  | 263  |
| LinJ09_V3.1040 | <i>L. infantum</i> | 268 | 21   | 288  |
| LinJ09_V3.1040 | <i>L. infantum</i> | 65  | 307  | 371  |
| LinJ09_V3.1040 | <i>L. infantum</i> | 46  | 380  | 425  |
| LinJ09_V3.1040 | <i>L. infantum</i> | 101 | 438  | 538  |
| LinJ09_V3.1040 | <i>L. infantum</i> | 392 | 560  | 951  |
| LinJ09_V3.1050 | <i>L. infantum</i> | 48  | 879  | 926  |
| LinJ09_V3.1050 | <i>L. infantum</i> | 65  | 1042 | 1106 |
| LinJ09_V3.1050 | <i>L. infantum</i> | 131 | 1166 | 1296 |
| LinJ09_V3.1050 | <i>L. infantum</i> | 89  | 1728 | 1816 |
| LinJ09_V3.1050 | <i>L. infantum</i> | 61  | 1894 | 1954 |
| LinJ09_V3.1050 | <i>L. infantum</i> | 134 | 1971 | 2104 |
| LinJ09_V3.1050 | <i>L. infantum</i> | 83  | 2147 | 2229 |
| LinJ09_V3.1050 | <i>L. infantum</i> | 80  | 2318 | 2397 |
| LinJ09_V3.1050 | <i>L. infantum</i> | 97  | 2600 | 2696 |
| LinJ09_V3.1050 | <i>L. infantum</i> | 192 | 2818 | 3009 |
| LinJ09_V3.1050 | <i>L. infantum</i> | 174 | 3130 | 3303 |
| LinJ09_V3.1050 | <i>L. infantum</i> | 179 | 3526 | 3704 |
| LinJ09_V3.1050 | <i>L. infantum</i> | 43  | 4196 | 4238 |
| LinJ09_V3.1050 | <i>L. infantum</i> | 84  | 4680 | 4763 |
| LinJ09_V3.1050 | <i>L. infantum</i> | 206 | 4853 | 5058 |
| LinJ09_V3.1050 | <i>L. infantum</i> | 112 | 5073 | 5184 |
| LinJ09_V3.1050 | <i>L. infantum</i> | 70  | 5294 | 5363 |
| LinJ09_V3.1060 | <i>L. infantum</i> | 56  | 128  | 183  |
| LinJ09_V3.1070 | <i>L. infantum</i> | 122 | 28   | 149  |
| LinJ09_V3.1080 | <i>L. infantum</i> | 106 | 1    | 106  |
| LinJ09_V3.1090 | <i>L. infantum</i> | 264 | 1    | 264  |

|                |                    |     |      |      |
|----------------|--------------------|-----|------|------|
| LinJ09_V3.1100 | <i>L. infantum</i> | 94  | 1    | 94   |
| LinJ09_V3.1110 | <i>L. infantum</i> | 71  | 136  | 206  |
| LinJ09_V3.1120 | <i>L. infantum</i> | 49  | 178  | 226  |
| LinJ09_V3.1140 | <i>L. infantum</i> | 59  | 392  | 450  |
| LinJ09_V3.1160 | <i>L. infantum</i> | 40  | 1    | 40   |
| LinJ09_V3.1160 | <i>L. infantum</i> | 44  | 44   | 87   |
| LinJ09_V3.1160 | <i>L. infantum</i> | 117 | 110  | 226  |
| LinJ09_V3.1170 | <i>L. infantum</i> | 185 | 1    | 185  |
| LinJ09_V3.1170 | <i>L. infantum</i> | 241 | 218  | 458  |
| LinJ09_V3.1180 | <i>L. infantum</i> | 45  | 34   | 78   |
| LinJ09_V3.1200 | <i>L. infantum</i> | 57  | 1    | 57   |
| LinJ09_V3.1200 | <i>L. infantum</i> | 41  | 142  | 182  |
| LinJ09_V3.1210 | <i>L. infantum</i> | 58  | 1    | 58   |
| LinJ09_V3.1210 | <i>L. infantum</i> | 52  | 129  | 180  |
| LinJ09_V3.1210 | <i>L. infantum</i> | 68  | 218  | 285  |
| LinJ09_V3.1220 | <i>L. infantum</i> | 89  | 1    | 89   |
| LinJ09_V3.1220 | <i>L. infantum</i> | 73  | 227  | 299  |
| LinJ09_V3.1220 | <i>L. infantum</i> | 59  | 446  | 504  |
| LinJ09_V3.1220 | <i>L. infantum</i> | 48  | 538  | 585  |
| LinJ09_V3.1220 | <i>L. infantum</i> | 47  | 693  | 739  |
| LinJ09_V3.1230 | <i>L. infantum</i> | 40  | 39   | 78   |
| LinJ09_V3.1240 | <i>L. infantum</i> | 371 | 1    | 371  |
| LinJ09_V3.1240 | <i>L. infantum</i> | 44  | 379  | 422  |
| LinJ09_V3.1240 | <i>L. infantum</i> | 132 | 443  | 574  |
| LinJ09_V3.1250 | <i>L. infantum</i> | 43  | 1    | 43   |
| LinJ09_V3.1250 | <i>L. infantum</i> | 85  | 117  | 201  |
| LinJ09_V3.1250 | <i>L. infantum</i> | 61  | 377  | 437  |
| LinJ09_V3.1250 | <i>L. infantum</i> | 80  | 444  | 523  |
| LinJ09_V3.1260 | <i>L. infantum</i> | 114 | 53   | 166  |
| LinJ09_V3.1260 | <i>L. infantum</i> | 91  | 203  | 293  |
| LinJ09_V3.1260 | <i>L. infantum</i> | 75  | 627  | 701  |
| LinJ09_V3.1260 | <i>L. infantum</i> | 50  | 890  | 939  |
| LinJ09_V3.1260 | <i>L. infantum</i> | 81  | 966  | 1046 |
| LinJ09_V3.1260 | <i>L. infantum</i> | 60  | 1070 | 1129 |
| LinJ09_V3.1260 | <i>L. infantum</i> | 62  | 1223 | 1284 |
| LinJ09_V3.1260 | <i>L. infantum</i> | 99  | 1423 | 1521 |
| LinJ09_V3.1270 | <i>L. infantum</i> | 187 | 234  | 420  |
| LinJ09_V3.1280 | <i>L. infantum</i> | 49  | 80   | 128  |
| LinJ09_V3.1280 | <i>L. infantum</i> | 75  | 334  | 408  |
| LinJ09_V3.1280 | <i>L. infantum</i> | 141 | 423  | 563  |
| LinJ09_V3.1290 | <i>L. infantum</i> | 74  | 1    | 74   |
| LinJ09_V3.1290 | <i>L. infantum</i> | 53  | 360  | 412  |
| LinJ09_V3.1300 | <i>L. infantum</i> | 72  | 114  | 185  |
| LinJ09_V3.1300 | <i>L. infantum</i> | 51  | 566  | 616  |
| LinJ09_V3.1300 | <i>L. infantum</i> | 48  | 1069 | 1116 |
| LinJ09_V3.1300 | <i>L. infantum</i> | 256 | 1192 | 1447 |
| LinJ09_V3.1300 | <i>L. infantum</i> | 50  | 1557 | 1606 |



|                |                    |     |      |      |
|----------------|--------------------|-----|------|------|
| LinJ09_V3.1300 | <i>L. infantum</i> | 71  | 1608 | 1678 |
| LinJ09_V3.1300 | <i>L. infantum</i> | 53  | 2021 | 2073 |
| LinJ09_V3.1300 | <i>L. infantum</i> | 47  | 2202 | 2248 |
| LinJ09_V3.1300 | <i>L. infantum</i> | 80  | 2403 | 2482 |
| LinJ09_V3.1320 | <i>L. infantum</i> | 58  | 127  | 184  |
| LinJ09_V3.1320 | <i>L. infantum</i> | 172 | 298  | 469  |
| LinJ09_V3.1320 | <i>L. infantum</i> | 172 | 298  | 469  |
| LinJ09_V3.1340 | <i>L. infantum</i> | 49  | 1    | 49   |
| LinJ09_V3.1340 | <i>L. infantum</i> | 78  | 77   | 154  |
| LinJ09_V3.1340 | <i>L. infantum</i> | 96  | 211  | 306  |
| LinJ09_V3.1350 | <i>L. infantum</i> | 64  | 85   | 148  |
| LinJ09_V3.1350 | <i>L. infantum</i> | 111 | 194  | 304  |
| LinJ09_V3.1350 | <i>L. infantum</i> | 58  | 318  | 375  |
| LinJ09_V3.1370 | <i>L. infantum</i> | 53  | 202  | 254  |
| LinJ09_V3.1390 | <i>L. infantum</i> | 109 | 247  | 355  |
| LinJ09_V3.1390 | <i>L. infantum</i> | 66  | 540  | 605  |
| LinJ09_V3.1390 | <i>L. infantum</i> | 66  | 540  | 605  |
| LinJ09_V3.1400 | <i>L. infantum</i> | 46  | 179  | 224  |
| LinJ09_V3.1440 | <i>L. infantum</i> | 73  | 1    | 73   |
| LinJ09_V3.1440 | <i>L. infantum</i> | 131 | 138  | 268  |
| LinJ09_V3.1450 | <i>L. infantum</i> | 168 | 23   | 190  |
| LinJ09_V3.1450 | <i>L. infantum</i> | 57  | 476  | 532  |
| LinJ09_V3.1450 | <i>L. infantum</i> | 57  | 476  | 532  |
| LinJ09_V3.1460 | <i>L. infantum</i> | 73  | 22   | 94   |
| LinJ09_V3.1470 | <i>L. infantum</i> | 73  | 131  | 203  |
| LinJ09_V3.1480 | <i>L. infantum</i> | 53  | 70   | 122  |
| LinJ09_V3.1480 | <i>L. infantum</i> | 125 | 147  | 271  |
| LinJ09_V3.1480 | <i>L. infantum</i> | 40  | 451  | 490  |
| LinJ09_V3.1480 | <i>L. infantum</i> | 45  | 529  | 573  |
| LinJ09_V3.1490 | <i>L. infantum</i> | 108 | 32   | 139  |
| LinJ09_V3.1520 | <i>L. infantum</i> | 164 | 57   | 220  |
| LinJ09_V3.1520 | <i>L. infantum</i> | 165 | 249  | 413  |
| LinJ09_V3.1560 | <i>L. infantum</i> | 43  | 350  | 392  |
| LinJ09_V3.1560 | <i>L. infantum</i> | 41  | 528  | 568  |
| LinJ09_V3.1560 | <i>L. infantum</i> | 41  | 528  | 568  |
| LinJ09_V3.1590 | <i>L. infantum</i> | 48  | 1    | 48   |
| LinJ09_V3.1600 | <i>L. infantum</i> | 71  | 136  | 206  |
| LinJ09_V3.1600 | <i>L. infantum</i> | 93  | 1069 | 1161 |
| LinJ09_V3.1620 | <i>L. infantum</i> | 51  | 55   | 105  |
| LinJ09_V3.1630 | <i>L. infantum</i> | 485 | 1    | 485  |
| LinJ09_V3.1630 | <i>L. infantum</i> | 110 | 498  | 607  |
| LinJ09_V3.1630 | <i>L. infantum</i> | 110 | 498  | 607  |
| LinJ09_V3.1640 | <i>L. infantum</i> | 70  | 1    | 70   |
| LinJ10_V3.0010 | <i>L. infantum</i> | 58  | 258  | 315  |
| LinJ10_V3.0080 | <i>L. infantum</i> | 238 | 1    | 238  |
| LinJ10_V3.0100 | <i>L. infantum</i> | 57  | 1    | 57   |
| LinJ10_V3.0100 | <i>L. infantum</i> | 70  | 67   | 136  |

|                |                    |     |      |      |
|----------------|--------------------|-----|------|------|
| LinJ10_V3.0100 | <i>L. infantum</i> | 60  | 202  | 261  |
| LinJ10_V3.0110 | <i>L. infantum</i> | 59  | 161  | 219  |
| LinJ10_V3.0110 | <i>L. infantum</i> | 116 | 265  | 380  |
| LinJ10_V3.0110 | <i>L. infantum</i> | 247 | 398  | 644  |
| LinJ10_V3.0110 | <i>L. infantum</i> | 74  | 664  | 737  |
| LinJ10_V3.0120 | <i>L. infantum</i> | 83  | 1    | 83   |
| LinJ10_V3.0120 | <i>L. infantum</i> | 127 | 123  | 249  |
| LinJ10_V3.0120 | <i>L. infantum</i> | 40  | 356  | 395  |
| LinJ10_V3.0130 | <i>L. infantum</i> | 50  | 1    | 50   |
| LinJ10_V3.0130 | <i>L. infantum</i> | 262 | 55   | 316  |
| LinJ10_V3.0130 | <i>L. infantum</i> | 47  | 323  | 369  |
| LinJ10_V3.0140 | <i>L. infantum</i> | 458 | 48   | 505  |
| LinJ10_V3.0150 | <i>L. infantum</i> | 107 | 411  | 517  |
| LinJ10_V3.0180 | <i>L. infantum</i> | 52  | 44   | 95   |
| LinJ10_V3.0180 | <i>L. infantum</i> | 108 | 109  | 216  |
| LinJ10_V3.0180 | <i>L. infantum</i> | 301 | 274  | 574  |
| LinJ10_V3.0190 | <i>L. infantum</i> | 89  | 1    | 89   |
| LinJ10_V3.0200 | <i>L. infantum</i> | 50  | 358  | 407  |
| LinJ10_V3.0210 | <i>L. infantum</i> | 54  | 420  | 473  |
| LinJ10_V3.0220 | <i>L. infantum</i> | 42  | 70   | 111  |
| LinJ10_V3.0220 | <i>L. infantum</i> | 48  | 168  | 215  |
| LinJ10_V3.0220 | <i>L. infantum</i> | 48  | 168  | 215  |
| LinJ10_V3.0230 | <i>L. infantum</i> | 53  | 226  | 278  |
| LinJ10_V3.0240 | <i>L. infantum</i> | 79  | 22   | 100  |
| LinJ10_V3.0250 | <i>L. infantum</i> | 44  | 1    | 44   |
| LinJ10_V3.0260 | <i>L. infantum</i> | 374 | 114  | 487  |
| LinJ10_V3.0260 | <i>L. infantum</i> | 129 | 540  | 668  |
| LinJ10_V3.0260 | <i>L. infantum</i> | 42  | 695  | 736  |
| LinJ10_V3.0270 | <i>L. infantum</i> | 73  | 36   | 108  |
| LinJ10_V3.0270 | <i>L. infantum</i> | 48  | 212  | 259  |
| LinJ10_V3.0270 | <i>L. infantum</i> | 48  | 212  | 259  |
| LinJ10_V3.0290 | <i>L. infantum</i> | 92  | 1    | 92   |
| LinJ10_V3.0290 | <i>L. infantum</i> | 52  | 154  | 205  |
| LinJ10_V3.0290 | <i>L. infantum</i> | 115 | 239  | 353  |
| LinJ10_V3.0290 | <i>L. infantum</i> | 68  | 378  | 445  |
| LinJ10_V3.0290 | <i>L. infantum</i> | 85  | 660  | 744  |
| LinJ10_V3.0290 | <i>L. infantum</i> | 48  | 761  | 808  |
| LinJ10_V3.0290 | <i>L. infantum</i> | 41  | 857  | 897  |
| LinJ10_V3.0300 | <i>L. infantum</i> | 75  | 106  | 180  |
| LinJ10_V3.0300 | <i>L. infantum</i> | 86  | 192  | 277  |
| LinJ10_V3.0300 | <i>L. infantum</i> | 432 | 279  | 710  |
| LinJ10_V3.0300 | <i>L. infantum</i> | 52  | 737  | 788  |
| LinJ10_V3.0300 | <i>L. infantum</i> | 98  | 970  | 1067 |
| LinJ10_V3.0300 | <i>L. infantum</i> | 45  | 1127 | 1171 |
| LinJ10_V3.0300 | <i>L. infantum</i> | 121 | 1253 | 1373 |
| LinJ10_V3.0300 | <i>L. infantum</i> | 47  | 1461 | 1507 |
| LinJ10_V3.0300 | <i>L. infantum</i> | 123 | 1535 | 1657 |

|                |                    |     |      |      |
|----------------|--------------------|-----|------|------|
| LinJ10_V3.0300 | <i>L. infantum</i> | 173 | 1806 | 1978 |
| LinJ10_V3.0320 | <i>L. infantum</i> | 263 | 1    | 263  |
| LinJ10_V3.0320 | <i>L. infantum</i> | 328 | 276  | 603  |
| LinJ10_V3.0330 | <i>L. infantum</i> | 51  | 484  | 534  |
| LinJ10_V3.0340 | <i>L. infantum</i> | 109 | 89   | 197  |
| LinJ10_V3.0340 | <i>L. infantum</i> | 178 | 245  | 422  |
| LinJ10_V3.0340 | <i>L. infantum</i> | 133 | 432  | 564  |
| LinJ10_V3.0340 | <i>L. infantum</i> | 180 | 678  | 857  |
| LinJ10_V3.0340 | <i>L. infantum</i> | 318 | 880  | 1197 |
| LinJ10_V3.0340 | <i>L. infantum</i> | 102 | 1264 | 1365 |
| LinJ10_V3.0350 | <i>L. infantum</i> | 202 | 234  | 435  |
| LinJ10_V3.0360 | <i>L. infantum</i> | 52  | 1    | 52   |
| LinJ10_V3.0360 | <i>L. infantum</i> | 91  | 298  | 388  |
| LinJ10_V3.0360 | <i>L. infantum</i> | 91  | 298  | 388  |
| LinJ10_V3.0370 | <i>L. infantum</i> | 76  | 270  | 345  |
| LinJ10_V3.0370 | <i>L. infantum</i> | 44  | 648  | 691  |
| LinJ10_V3.0370 | <i>L. infantum</i> | 44  | 648  | 691  |
| LinJ10_V3.0380 | <i>L. infantum</i> | 78  | 273  | 350  |
| LinJ10_V3.0390 | <i>L. infantum</i> | 78  | 271  | 348  |
| LinJ10_V3.0390 | <i>L. infantum</i> | 44  | 657  | 700  |
| LinJ10_V3.0390 | <i>L. infantum</i> | 44  | 657  | 700  |
| LinJ10_V3.0400 | <i>L. infantum</i> | 78  | 271  | 348  |
| LinJ10_V3.0400 | <i>L. infantum</i> | 49  | 656  | 704  |
| LinJ10_V3.0400 | <i>L. infantum</i> | 49  | 656  | 704  |
| LinJ10_V3.0410 | <i>L. infantum</i> | 78  | 271  | 348  |
| LinJ10_V3.0410 | <i>L. infantum</i> | 43  | 656  | 698  |
| LinJ10_V3.0410 | <i>L. infantum</i> | 43  | 656  | 698  |
| LinJ10_V3.0420 | <i>L. infantum</i> | 63  | 253  | 315  |
| LinJ10_V3.0440 | <i>L. infantum</i> | 211 | 1    | 211  |
| LinJ10_V3.0440 | <i>L. infantum</i> | 171 | 240  | 410  |
| LinJ10_V3.0440 | <i>L. infantum</i> | 137 | 499  | 635  |
| LinJ10_V3.0450 | <i>L. infantum</i> | 41  | 62   | 102  |
| LinJ10_V3.0460 | <i>L. infantum</i> | 44  | 54   | 97   |
| LinJ10_V3.0520 | <i>L. infantum</i> | 183 | 1    | 183  |
| LinJ10_V3.0550 | <i>L. infantum</i> | 93  | 443  | 535  |
| LinJ10_V3.0550 | <i>L. infantum</i> | 41  | 717  | 757  |
| LinJ10_V3.0550 | <i>L. infantum</i> | 42  | 1114 | 1155 |
| LinJ10_V3.0550 | <i>L. infantum</i> | 44  | 1424 | 1467 |
| LinJ10_V3.0550 | <i>L. infantum</i> | 66  | 2380 | 2445 |
| LinJ10_V3.0550 | <i>L. infantum</i> | 61  | 2479 | 2539 |
| LinJ10_V3.0550 | <i>L. infantum</i> | 64  | 5591 | 5654 |
| LinJ10_V3.0550 | <i>L. infantum</i> | 53  | 6228 | 6280 |
| LinJ10_V3.0550 | <i>L. infantum</i> | 308 | 6495 | 6802 |
| LinJ10_V3.0570 | <i>L. infantum</i> | 78  | 23   | 100  |
| LinJ10_V3.0570 | <i>L. infantum</i> | 43  | 181  | 223  |
| LinJ10_V3.0570 | <i>L. infantum</i> | 106 | 352  | 457  |
| LinJ10_V3.0570 | <i>L. infantum</i> | 154 | 753  | 906  |

|                |                    |     |      |      |
|----------------|--------------------|-----|------|------|
| LinJ10_V3.0580 | <i>L. infantum</i> | 195 | 1    | 195  |
| LinJ10_V3.0580 | <i>L. infantum</i> | 121 | 222  | 342  |
| LinJ10_V3.0580 | <i>L. infantum</i> | 182 | 364  | 545  |
| LinJ10_V3.0580 | <i>L. infantum</i> | 120 | 569  | 688  |
| LinJ10_V3.0580 | <i>L. infantum</i> | 67  | 697  | 763  |
| LinJ10_V3.0580 | <i>L. infantum</i> | 379 | 777  | 1155 |
| LinJ10_V3.0590 | <i>L. infantum</i> | 64  | 235  | 298  |
| LinJ10_V3.0590 | <i>L. infantum</i> | 121 | 518  | 638  |
| LinJ10_V3.0590 | <i>L. infantum</i> | 167 | 762  | 928  |
| LinJ10_V3.0590 | <i>L. infantum</i> | 129 | 961  | 1089 |
| LinJ10_V3.0600 | <i>L. infantum</i> | 59  | 1    | 59   |
| LinJ10_V3.0600 | <i>L. infantum</i> | 85  | 347  | 431  |
| LinJ10_V3.0620 | <i>L. infantum</i> | 49  | 430  | 478  |
| LinJ10_V3.0630 | <i>L. infantum</i> | 214 | 1    | 214  |
| LinJ10_V3.0630 | <i>L. infantum</i> | 58  | 231  | 288  |
| LinJ10_V3.0630 | <i>L. infantum</i> | 75  | 394  | 468  |
| LinJ10_V3.0630 | <i>L. infantum</i> | 51  | 506  | 556  |
| LinJ10_V3.0630 | <i>L. infantum</i> | 166 | 605  | 770  |
| LinJ10_V3.0660 | <i>L. infantum</i> | 45  | 47   | 91   |
| LinJ10_V3.0660 | <i>L. infantum</i> | 86  | 143  | 228  |
| LinJ10_V3.0660 | <i>L. infantum</i> | 45  | 258  | 302  |
| LinJ10_V3.0680 | <i>L. infantum</i> | 54  | 355  | 408  |
| LinJ10_V3.0690 | <i>L. infantum</i> | 76  | 102  | 177  |
| LinJ10_V3.0700 | <i>L. infantum</i> | 129 | 68   | 196  |
| LinJ10_V3.0710 | <i>L. infantum</i> | 195 | 1    | 195  |
| LinJ10_V3.0710 | <i>L. infantum</i> | 124 | 204  | 327  |
| LinJ10_V3.0710 | <i>L. infantum</i> | 675 | 348  | 1022 |
| LinJ10_V3.0710 | <i>L. infantum</i> | 156 | 1060 | 1215 |
| LinJ10_V3.0710 | <i>L. infantum</i> | 459 | 1220 | 1678 |
| LinJ10_V3.0720 | <i>L. infantum</i> | 118 | 1    | 118  |
| LinJ10_V3.0730 | <i>L. infantum</i> | 67  | 1    | 67   |
| LinJ10_V3.0730 | <i>L. infantum</i> | 431 | 75   | 505  |
| LinJ10_V3.0740 | <i>L. infantum</i> | 41  | 114  | 154  |
| LinJ10_V3.0740 | <i>L. infantum</i> | 99  | 215  | 313  |
| LinJ10_V3.0740 | <i>L. infantum</i> | 45  | 359  | 403  |
| LinJ10_V3.0740 | <i>L. infantum</i> | 41  | 710  | 750  |
| LinJ10_V3.0740 | <i>L. infantum</i> | 105 | 845  | 949  |
| LinJ10_V3.0740 | <i>L. infantum</i> | 57  | 1155 | 1211 |
| LinJ10_V3.0740 | <i>L. infantum</i> | 67  | 1223 | 1289 |
| LinJ10_V3.0740 | <i>L. infantum</i> | 44  | 1330 | 1373 |
| LinJ10_V3.0740 | <i>L. infantum</i> | 45  | 1435 | 1479 |
| LinJ10_V3.0750 | <i>L. infantum</i> | 58  | 13   | 70   |
| LinJ10_V3.0750 | <i>L. infantum</i> | 254 | 114  | 367  |
| LinJ10_V3.0750 | <i>L. infantum</i> | 64  | 445  | 508  |
| LinJ10_V3.0750 | <i>L. infantum</i> | 93  | 782  | 874  |
| LinJ10_V3.0760 | <i>L. infantum</i> | 70  | 1    | 70   |
| LinJ10_V3.0770 | <i>L. infantum</i> | 70  | 1    | 70   |

|                |                    |      |      |      |
|----------------|--------------------|------|------|------|
| LinJ10_V3.0780 | <i>L. infantum</i> | 44   | 103  | 146  |
| LinJ10_V3.0780 | <i>L. infantum</i> | 41   | 195  | 235  |
| LinJ10_V3.0780 | <i>L. infantum</i> | 41   | 195  | 235  |
| LinJ10_V3.0790 | <i>L. infantum</i> | 75   | 51   | 125  |
| LinJ10_V3.0800 | <i>L. infantum</i> | 372  | 22   | 393  |
| LinJ10_V3.0800 | <i>L. infantum</i> | 207  | 419  | 625  |
| LinJ10_V3.0800 | <i>L. infantum</i> | 372  | 663  | 1034 |
| LinJ10_V3.0800 | <i>L. infantum</i> | 78   | 1037 | 1114 |
| LinJ10_V3.0800 | <i>L. infantum</i> | 264  | 1148 | 1411 |
| LinJ10_V3.0800 | <i>L. infantum</i> | 92   | 1461 | 1552 |
| LinJ10_V3.0800 | <i>L. infantum</i> | 135  | 1587 | 1721 |
| LinJ10_V3.0800 | <i>L. infantum</i> | 173  | 1803 | 1975 |
| LinJ10_V3.0810 | <i>L. infantum</i> | 130  | 137  | 266  |
| LinJ10_V3.0810 | <i>L. infantum</i> | 61   | 325  | 385  |
| LinJ10_V3.0810 | <i>L. infantum</i> | 56   | 466  | 521  |
| LinJ10_V3.0820 | <i>L. infantum</i> | 48   | 192  | 239  |
| LinJ10_V3.0820 | <i>L. infantum</i> | 89   | 284  | 372  |
| LinJ10_V3.0820 | <i>L. infantum</i> | 47   | 549  | 595  |
| LinJ10_V3.0840 | <i>L. infantum</i> | 221  | 1    | 221  |
| LinJ10_V3.0850 | <i>L. infantum</i> | 65   | 73   | 137  |
| LinJ10_V3.0850 | <i>L. infantum</i> | 270  | 292  | 561  |
| LinJ10_V3.0850 | <i>L. infantum</i> | 388  | 887  | 1274 |
| LinJ10_V3.0860 | <i>L. infantum</i> | 191  | 61   | 251  |
| LinJ10_V3.0860 | <i>L. infantum</i> | 78   | 434  | 511  |
| LinJ10_V3.0860 | <i>L. infantum</i> | 80   | 629  | 708  |
| LinJ10_V3.0860 | <i>L. infantum</i> | 84   | 939  | 1022 |
| LinJ10_V3.0860 | <i>L. infantum</i> | 64   | 1251 | 1314 |
| LinJ10_V3.0860 | <i>L. infantum</i> | 161  | 1646 | 1806 |
| LinJ10_V3.0860 | <i>L. infantum</i> | 254  | 1820 | 2073 |
| LinJ10_V3.0870 | <i>L. infantum</i> | 86   | 1    | 86   |
| LinJ10_V3.0870 | <i>L. infantum</i> | 64   | 88   | 151  |
| LinJ10_V3.0880 | <i>L. infantum</i> | 1278 | 1    | 1278 |
| LinJ10_V3.0880 | <i>L. infantum</i> | 76   | 1396 | 1471 |
| LinJ10_V3.0890 | <i>L. infantum</i> | 72   | 315  | 386  |
| LinJ10_V3.0890 | <i>L. infantum</i> | 63   | 498  | 560  |
| LinJ10_V3.0890 | <i>L. infantum</i> | 63   | 498  | 560  |
| LinJ10_V3.0910 | <i>L. infantum</i> | 54   | 67   | 120  |
| LinJ10_V3.0920 | <i>L. infantum</i> | 53   | 1    | 53   |
| LinJ10_V3.0930 | <i>L. infantum</i> | 192  | 1    | 192  |
| LinJ10_V3.0930 | <i>L. infantum</i> | 464  | 221  | 684  |
| LinJ10_V3.0930 | <i>L. infantum</i> | 319  | 688  | 1006 |
| LinJ10_V3.0930 | <i>L. infantum</i> | 96   | 1025 | 1120 |
| LinJ10_V3.0940 | <i>L. infantum</i> | 41   | 37   | 77   |
| LinJ10_V3.0950 | <i>L. infantum</i> | 42   | 1    | 42   |
| LinJ10_V3.0950 | <i>L. infantum</i> | 61   | 75   | 135  |
| LinJ10_V3.0950 | <i>L. infantum</i> | 57   | 158  | 214  |
| LinJ10_V3.0950 | <i>L. infantum</i> | 372  | 567  | 938  |

|                |                    |     |      |      |
|----------------|--------------------|-----|------|------|
| LinJ10_V3.0950 | <i>L. infantum</i> | 66  | 951  | 1016 |
| LinJ10_V3.0950 | <i>L. infantum</i> | 54  | 1065 | 1118 |
| LinJ10_V3.0950 | <i>L. infantum</i> | 59  | 1154 | 1212 |
| LinJ10_V3.0950 | <i>L. infantum</i> | 81  | 1231 | 1311 |
| LinJ10_V3.0950 | <i>L. infantum</i> | 44  | 1348 | 1391 |
| LinJ10_V3.0950 | <i>L. infantum</i> | 94  | 1393 | 1486 |
| LinJ10_V3.0990 | <i>L. infantum</i> | 154 | 1    | 154  |
| LinJ10_V3.0990 | <i>L. infantum</i> | 81  | 178  | 258  |
| LinJ10_V3.1010 | <i>L. infantum</i> | 50  | 1    | 50   |
| LinJ10_V3.1010 | <i>L. infantum</i> | 250 | 359  | 608  |
| LinJ10_V3.1010 | <i>L. infantum</i> | 89  | 630  | 718  |
| LinJ10_V3.1010 | <i>L. infantum</i> | 188 | 720  | 907  |
| LinJ10_V3.1010 | <i>L. infantum</i> | 163 | 1080 | 1242 |
| LinJ10_V3.1030 | <i>L. infantum</i> | 124 | 128  | 251  |
| LinJ10_V3.1040 | <i>L. infantum</i> | 159 | 1    | 159  |
| LinJ10_V3.1040 | <i>L. infantum</i> | 92  | 265  | 356  |
| LinJ10_V3.1040 | <i>L. infantum</i> | 40  | 538  | 577  |
| LinJ10_V3.1040 | <i>L. infantum</i> | 88  | 591  | 678  |
| LinJ10_V3.1040 | <i>L. infantum</i> | 126 | 681  | 806  |
| LinJ10_V3.1060 | <i>L. infantum</i> | 41  | 126  | 166  |
| LinJ10_V3.1060 | <i>L. infantum</i> | 92  | 231  | 322  |
| LinJ10_V3.1060 | <i>L. infantum</i> | 47  | 397  | 443  |
| LinJ10_V3.1060 | <i>L. infantum</i> | 107 | 485  | 591  |
| LinJ10_V3.1070 | <i>L. infantum</i> | 53  | 1    | 53   |
| LinJ10_V3.1080 | <i>L. infantum</i> | 82  | 27   | 108  |
| LinJ10_V3.1100 | <i>L. infantum</i> | 83  | 1    | 83   |
| LinJ10_V3.1110 | <i>L. infantum</i> | 172 | 1    | 172  |
| LinJ10_V3.1110 | <i>L. infantum</i> | 59  | 324  | 382  |
| LinJ10_V3.1120 | <i>L. infantum</i> | 154 | 216  | 369  |
| LinJ10_V3.1120 | <i>L. infantum</i> | 78  | 619  | 696  |
| LinJ10_V3.1120 | <i>L. infantum</i> | 57  | 798  | 854  |
| LinJ10_V3.1120 | <i>L. infantum</i> | 50  | 895  | 944  |
| LinJ10_V3.1120 | <i>L. infantum</i> | 43  | 1015 | 1057 |
| LinJ10_V3.1130 | <i>L. infantum</i> | 47  | 102  | 148  |
| LinJ10_V3.1140 | <i>L. infantum</i> | 45  | 52   | 96   |
| LinJ10_V3.1140 | <i>L. infantum</i> | 57  | 237  | 293  |
| LinJ10_V3.1150 | <i>L. infantum</i> | 180 | 1    | 180  |
| LinJ10_V3.1150 | <i>L. infantum</i> | 287 | 204  | 490  |
| LinJ10_V3.1150 | <i>L. infantum</i> | 63  | 509  | 571  |
| LinJ10_V3.1160 | <i>L. infantum</i> | 103 | 1    | 103  |
| LinJ10_V3.1160 | <i>L. infantum</i> | 49  | 125  | 173  |
| LinJ10_V3.1160 | <i>L. infantum</i> | 69  | 397  | 465  |
| LinJ10_V3.1170 | <i>L. infantum</i> | 42  | 57   | 98   |
| LinJ10_V3.1170 | <i>L. infantum</i> | 181 | 210  | 390  |
| LinJ10_V3.1170 | <i>L. infantum</i> | 71  | 544  | 614  |
| LinJ10_V3.1190 | <i>L. infantum</i> | 40  | 314  | 353  |
| LinJ10_V3.1190 | <i>L. infantum</i> | 50  | 375  | 424  |

|                |                    |     |      |      |
|----------------|--------------------|-----|------|------|
| LinJ10_V3.1200 | <i>L. infantum</i> | 150 | 161  | 310  |
| LinJ10_V3.1200 | <i>L. infantum</i> | 186 | 338  | 523  |
| LinJ10_V3.1210 | <i>L. infantum</i> | 40  | 69   | 108  |
| LinJ10_V3.1220 | <i>L. infantum</i> | 195 | 1    | 195  |
| LinJ10_V3.1220 | <i>L. infantum</i> | 44  | 214  | 257  |
| LinJ10_V3.1220 | <i>L. infantum</i> | 106 | 890  | 995  |
| LinJ10_V3.1220 | <i>L. infantum</i> | 124 | 1274 | 1397 |
| LinJ10_V3.1230 | <i>L. infantum</i> | 58  | 204  | 261  |
| LinJ10_V3.1240 | <i>L. infantum</i> | 427 | 54   | 480  |
| LinJ10_V3.1250 | <i>L. infantum</i> | 42  | 175  | 216  |
| LinJ10_V3.1280 | <i>L. infantum</i> | 379 | 1    | 379  |
| LinJ10_V3.1290 | <i>L. infantum</i> | 128 | 62   | 189  |
| LinJ10_V3.1310 | <i>L. infantum</i> | 95  | 1    | 95   |
| LinJ10_V3.1310 | <i>L. infantum</i> | 204 | 295  | 498  |
| LinJ10_V3.1440 | <i>L. infantum</i> | 58  | 258  | 315  |
| LinJ11_V3.0010 | <i>L. infantum</i> | 131 | 1    | 131  |
| LinJ11_V3.0020 | <i>L. infantum</i> | 41  | 111  | 151  |
| LinJ11_V3.0020 | <i>L. infantum</i> | 46  | 244  | 289  |
| LinJ11_V3.0020 | <i>L. infantum</i> | 46  | 244  | 289  |
| LinJ11_V3.0030 | <i>L. infantum</i> | 51  | 257  | 307  |
| LinJ11_V3.0040 | <i>L. infantum</i> | 66  | 236  | 301  |
| LinJ11_V3.0050 | <i>L. infantum</i> | 43  | 585  | 627  |
| LinJ11_V3.0060 | <i>L. infantum</i> | 64  | 12   | 75   |
| LinJ11_V3.0060 | <i>L. infantum</i> | 100 | 252  | 351  |
| LinJ11_V3.0070 | <i>L. infantum</i> | 51  | 1    | 51   |
| LinJ11_V3.0070 | <i>L. infantum</i> | 232 | 113  | 344  |
| LinJ11_V3.0070 | <i>L. infantum</i> | 675 | 361  | 1035 |
| LinJ11_V3.0070 | <i>L. infantum</i> | 114 | 1096 | 1209 |
| LinJ11_V3.0080 | <i>L. infantum</i> | 86  | 1    | 86   |
| LinJ11_V3.0080 | <i>L. infantum</i> | 63  | 163  | 225  |
| LinJ11_V3.0080 | <i>L. infantum</i> | 63  | 163  | 225  |
| LinJ11_V3.0090 | <i>L. infantum</i> | 55  | 151  | 205  |
| LinJ11_V3.0090 | <i>L. infantum</i> | 51  | 439  | 489  |
| LinJ11_V3.0090 | <i>L. infantum</i> | 51  | 439  | 489  |
| LinJ11_V3.0100 | <i>L. infantum</i> | 82  | 49   | 130  |
| LinJ11_V3.0140 | <i>L. infantum</i> | 106 | 39   | 144  |
| LinJ11_V3.0150 | <i>L. infantum</i> | 634 | 1    | 634  |
| LinJ11_V3.0150 | <i>L. infantum</i> | 219 | 662  | 880  |
| LinJ11_V3.0160 | <i>L. infantum</i> | 70  | 143  | 212  |
| LinJ11_V3.0170 | <i>L. infantum</i> | 157 | 122  | 278  |
| LinJ11_V3.0170 | <i>L. infantum</i> | 61  | 295  | 355  |
| LinJ11_V3.0170 | <i>L. infantum</i> | 94  | 368  | 461  |
| LinJ11_V3.0190 | <i>L. infantum</i> | 43  | 54   | 96   |
| LinJ11_V3.0190 | <i>L. infantum</i> | 42  | 420  | 461  |
| LinJ11_V3.0190 | <i>L. infantum</i> | 55  | 555  | 609  |
| LinJ11_V3.0200 | <i>L. infantum</i> | 133 | 1    | 133  |
| LinJ11_V3.0210 | <i>L. infantum</i> | 46  | 40   | 85   |

|                |                    |     |      |      |
|----------------|--------------------|-----|------|------|
| LinJ11_V3.0230 | <i>L. infantum</i> | 90  | 53   | 142  |
| LinJ11_V3.0230 | <i>L. infantum</i> | 42  | 399  | 440  |
| LinJ11_V3.0230 | <i>L. infantum</i> | 47  | 450  | 496  |
| LinJ11_V3.0250 | <i>L. infantum</i> | 234 | 1    | 234  |
| LinJ11_V3.0250 | <i>L. infantum</i> | 52  | 239  | 290  |
| LinJ11_V3.0250 | <i>L. infantum</i> | 175 | 307  | 481  |
| LinJ11_V3.0250 | <i>L. infantum</i> | 80  | 540  | 619  |
| LinJ11_V3.0250 | <i>L. infantum</i> | 46  | 749  | 794  |
| LinJ11_V3.0250 | <i>L. infantum</i> | 133 | 852  | 984  |
| LinJ11_V3.0260 | <i>L. infantum</i> | 43  | 439  | 481  |
| LinJ11_V3.0290 | <i>L. infantum</i> | 183 | 1    | 183  |
| LinJ11_V3.0290 | <i>L. infantum</i> | 66  | 185  | 250  |
| LinJ11_V3.0290 | <i>L. infantum</i> | 119 | 256  | 374  |
| LinJ11_V3.0290 | <i>L. infantum</i> | 61  | 403  | 463  |
| LinJ11_V3.0300 | <i>L. infantum</i> | 41  | 1    | 41   |
| LinJ11_V3.0300 | <i>L. infantum</i> | 155 | 69   | 223  |
| LinJ11_V3.0310 | <i>L. infantum</i> | 61  | 1    | 61   |
| LinJ11_V3.0310 | <i>L. infantum</i> | 74  | 92   | 165  |
| LinJ11_V3.0310 | <i>L. infantum</i> | 181 | 377  | 557  |
| LinJ11_V3.0310 | <i>L. infantum</i> | 55  | 560  | 614  |
| LinJ11_V3.0310 | <i>L. infantum</i> | 62  | 643  | 704  |
| LinJ11_V3.0310 | <i>L. infantum</i> | 95  | 724  | 818  |
| LinJ11_V3.0310 | <i>L. infantum</i> | 56  | 961  | 1016 |
| LinJ11_V3.0310 | <i>L. infantum</i> | 44  | 1336 | 1379 |
| LinJ11_V3.0310 | <i>L. infantum</i> | 57  | 1396 | 1452 |
| LinJ11_V3.0310 | <i>L. infantum</i> | 44  | 1494 | 1537 |
| LinJ11_V3.0310 | <i>L. infantum</i> | 50  | 1756 | 1805 |
| LinJ11_V3.0320 | <i>L. infantum</i> | 152 | 56   | 207  |
| LinJ11_V3.0320 | <i>L. infantum</i> | 53  | 228  | 280  |
| LinJ11_V3.0320 | <i>L. infantum</i> | 71  | 288  | 358  |
| LinJ11_V3.0320 | <i>L. infantum</i> | 158 | 442  | 599  |
| LinJ11_V3.0320 | <i>L. infantum</i> | 53  | 712  | 764  |
| LinJ11_V3.0320 | <i>L. infantum</i> | 93  | 943  | 1035 |
| LinJ11_V3.0320 | <i>L. infantum</i> | 75  | 1441 | 1515 |
| LinJ11_V3.0330 | <i>L. infantum</i> | 73  | 1    | 73   |
| LinJ11_V3.0330 | <i>L. infantum</i> | 48  | 163  | 210  |
| LinJ11_V3.0330 | <i>L. infantum</i> | 54  | 414  | 467  |
| LinJ11_V3.0330 | <i>L. infantum</i> | 83  | 785  | 867  |
| LinJ11_V3.0330 | <i>L. infantum</i> | 99  | 896  | 994  |
| LinJ11_V3.0340 | <i>L. infantum</i> | 82  | 67   | 148  |
| LinJ11_V3.0340 | <i>L. infantum</i> | 101 | 337  | 437  |
| LinJ11_V3.0350 | <i>L. infantum</i> | 49  | 205  | 253  |
| LinJ11_V3.0360 | <i>L. infantum</i> | 100 | 60   | 159  |
| LinJ11_V3.0360 | <i>L. infantum</i> | 44  | 246  | 289  |
| LinJ11_V3.0360 | <i>L. infantum</i> | 55  | 301  | 355  |
| LinJ11_V3.0370 | <i>L. infantum</i> | 136 | 1    | 136  |
| LinJ11_V3.0370 | <i>L. infantum</i> | 404 | 168  | 571  |



|                |                    |     |     |      |
|----------------|--------------------|-----|-----|------|
| LinJ11_V3.0380 | <i>L. infantum</i> | 165 | 1   | 165  |
| LinJ11_V3.0380 | <i>L. infantum</i> | 43  | 427 | 469  |
| LinJ11_V3.0380 | <i>L. infantum</i> | 67  | 505 | 571  |
| LinJ11_V3.0380 | <i>L. infantum</i> | 66  | 581 | 646  |
| LinJ11_V3.0380 | <i>L. infantum</i> | 61  | 835 | 895  |
| LinJ11_V3.0390 | <i>L. infantum</i> | 97  | 66  | 162  |
| LinJ11_V3.0390 | <i>L. infantum</i> | 54  | 246 | 299  |
| LinJ11_V3.0390 | <i>L. infantum</i> | 55  | 319 | 373  |
| LinJ11_V3.0390 | <i>L. infantum</i> | 106 | 376 | 481  |
| LinJ11_V3.0400 | <i>L. infantum</i> | 118 | 1   | 118  |
| LinJ11_V3.0400 | <i>L. infantum</i> | 48  | 158 | 205  |
| LinJ11_V3.0400 | <i>L. infantum</i> | 76  | 559 | 634  |
| LinJ11_V3.0400 | <i>L. infantum</i> | 438 | 664 | 1101 |
| LinJ11_V3.0410 | <i>L. infantum</i> | 122 | 1   | 122  |
| LinJ11_V3.0410 | <i>L. infantum</i> | 113 | 249 | 361  |
| LinJ11_V3.0410 | <i>L. infantum</i> | 42  | 541 | 582  |
| LinJ11_V3.0420 | <i>L. infantum</i> | 41  | 529 | 569  |
| LinJ11_V3.0420 | <i>L. infantum</i> | 40  | 688 | 727  |
| LinJ11_V3.0420 | <i>L. infantum</i> | 40  | 688 | 727  |
| LinJ11_V3.0430 | <i>L. infantum</i> | 94  | 28  | 121  |
| LinJ11_V3.0430 | <i>L. infantum</i> | 40  | 292 | 331  |
| LinJ11_V3.0430 | <i>L. infantum</i> | 55  | 398 | 452  |
| LinJ11_V3.0430 | <i>L. infantum</i> | 45  | 599 | 643  |
| LinJ11_V3.0440 | <i>L. infantum</i> | 399 | 182 | 580  |
| LinJ11_V3.0450 | <i>L. infantum</i> | 40  | 150 | 189  |
| LinJ11_V3.0450 | <i>L. infantum</i> | 51  | 235 | 285  |
| LinJ11_V3.0450 | <i>L. infantum</i> | 49  | 324 | 372  |
| LinJ11_V3.0450 | <i>L. infantum</i> | 51  | 436 | 486  |
| LinJ11_V3.0450 | <i>L. infantum</i> | 70  | 559 | 628  |
| LinJ11_V3.0450 | <i>L. infantum</i> | 40  | 667 | 706  |
| LinJ11_V3.0460 | <i>L. infantum</i> | 47  | 1   | 47   |
| LinJ11_V3.0460 | <i>L. infantum</i> | 57  | 76  | 132  |
| LinJ11_V3.0460 | <i>L. infantum</i> | 44  | 165 | 208  |
| LinJ11_V3.0460 | <i>L. infantum</i> | 46  | 312 | 357  |
| LinJ11_V3.0470 | <i>L. infantum</i> | 53  | 1   | 53   |
| LinJ11_V3.0470 | <i>L. infantum</i> | 91  | 85  | 175  |
| LinJ11_V3.0470 | <i>L. infantum</i> | 49  | 292 | 340  |
| LinJ11_V3.0490 | <i>L. infantum</i> | 56  | 59  | 114  |
| LinJ11_V3.0510 | <i>L. infantum</i> | 112 | 1   | 112  |
| LinJ11_V3.0510 | <i>L. infantum</i> | 59  | 254 | 312  |
| LinJ11_V3.0510 | <i>L. infantum</i> | 75  | 718 | 792  |
| LinJ11_V3.0510 | <i>L. infantum</i> | 41  | 875 | 915  |
| LinJ11_V3.0510 | <i>L. infantum</i> | 163 | 920 | 1082 |
| LinJ11_V3.0520 | <i>L. infantum</i> | 64  | 307 | 370  |
| LinJ11_V3.0530 | <i>L. infantum</i> | 48  | 111 | 158  |
| LinJ11_V3.0530 | <i>L. infantum</i> | 70  | 324 | 393  |
| LinJ11_V3.0530 | <i>L. infantum</i> | 70  | 324 | 393  |

|                |                    |     |      |      |
|----------------|--------------------|-----|------|------|
| LinJ11_V3.0540 | <i>L. infantum</i> | 96  | 31   | 126  |
| LinJ11_V3.0540 | <i>L. infantum</i> | 48  | 271  | 318  |
| LinJ11_V3.0540 | <i>L. infantum</i> | 48  | 271  | 318  |
| LinJ11_V3.0560 | <i>L. infantum</i> | 110 | 58   | 167  |
| LinJ11_V3.0580 | <i>L. infantum</i> | 56  | 1    | 56   |
| LinJ11_V3.0580 | <i>L. infantum</i> | 87  | 224  | 310  |
| LinJ11_V3.0590 | <i>L. infantum</i> | 40  | 1021 | 1060 |
| LinJ11_V3.0610 | <i>L. infantum</i> | 222 | 61   | 282  |
| LinJ11_V3.0610 | <i>L. infantum</i> | 211 | 388  | 598  |
| LinJ11_V3.0650 | <i>L. infantum</i> | 80  | 13   | 92   |
| LinJ11_V3.0650 | <i>L. infantum</i> | 125 | 239  | 363  |
| LinJ11_V3.0650 | <i>L. infantum</i> | 56  | 412  | 467  |
| LinJ11_V3.0650 | <i>L. infantum</i> | 61  | 502  | 562  |
| LinJ11_V3.0650 | <i>L. infantum</i> | 54  | 598  | 651  |
| LinJ11_V3.0650 | <i>L. infantum</i> | 109 | 751  | 859  |
| LinJ11_V3.0650 | <i>L. infantum</i> | 45  | 898  | 942  |
| LinJ11_V3.0650 | <i>L. infantum</i> | 54  | 1112 | 1165 |
| LinJ11_V3.0650 | <i>L. infantum</i> | 310 | 1208 | 1517 |
| LinJ11_V3.0650 | <i>L. infantum</i> | 40  | 1551 | 1590 |
| LinJ11_V3.0660 | <i>L. infantum</i> | 57  | 308  | 364  |
| LinJ11_V3.0670 | <i>L. infantum</i> | 65  | 313  | 377  |
| LinJ11_V3.0670 | <i>L. infantum</i> | 45  | 655  | 699  |
| LinJ11_V3.0680 | <i>L. infantum</i> | 53  | 570  | 622  |
| LinJ11_V3.0690 | <i>L. infantum</i> | 66  | 520  | 585  |
| LinJ11_V3.0710 | <i>L. infantum</i> | 89  | 43   | 131  |
| LinJ11_V3.0710 | <i>L. infantum</i> | 55  | 217  | 271  |
| LinJ11_V3.0710 | <i>L. infantum</i> | 55  | 217  | 271  |
| LinJ11_V3.0720 | <i>L. infantum</i> | 75  | 1    | 75   |
| LinJ11_V3.0720 | <i>L. infantum</i> | 190 | 109  | 298  |
| LinJ11_V3.0720 | <i>L. infantum</i> | 43  | 339  | 381  |
| LinJ11_V3.0720 | <i>L. infantum</i> | 133 | 424  | 556  |
| LinJ11_V3.0730 | <i>L. infantum</i> | 72  | 251  | 322  |
| LinJ11_V3.0730 | <i>L. infantum</i> | 127 | 333  | 459  |
| LinJ11_V3.0730 | <i>L. infantum</i> | 156 | 498  | 653  |
| LinJ11_V3.0740 | <i>L. infantum</i> | 137 | 1    | 137  |
| LinJ11_V3.0740 | <i>L. infantum</i> | 105 | 196  | 300  |
| LinJ11_V3.0740 | <i>L. infantum</i> | 40  | 342  | 381  |
| LinJ11_V3.0740 | <i>L. infantum</i> | 85  | 403  | 487  |
| LinJ11_V3.0740 | <i>L. infantum</i> | 92  | 599  | 690  |
| LinJ11_V3.0740 | <i>L. infantum</i> | 171 | 740  | 910  |
| LinJ11_V3.0740 | <i>L. infantum</i> | 100 | 928  | 1027 |
| LinJ11_V3.0740 | <i>L. infantum</i> | 53  | 1063 | 1115 |
| LinJ11_V3.0750 | <i>L. infantum</i> | 59  | 1    | 59   |
| LinJ11_V3.0750 | <i>L. infantum</i> | 74  | 253  | 326  |
| LinJ11_V3.0750 | <i>L. infantum</i> | 87  | 358  | 444  |
| LinJ11_V3.0760 | <i>L. infantum</i> | 92  | 114  | 205  |
| LinJ11_V3.0770 | <i>L. infantum</i> | 96  | 69   | 164  |

|                |                    |     |      |      |
|----------------|--------------------|-----|------|------|
| LinJ11_V3.0780 | <i>L. infantum</i> | 103 | 191  | 293  |
| LinJ11_V3.0810 | <i>L. infantum</i> | 85  | 75   | 159  |
| LinJ11_V3.0810 | <i>L. infantum</i> | 54  | 477  | 530  |
| LinJ11_V3.0810 | <i>L. infantum</i> | 54  | 477  | 530  |
| LinJ11_V3.0820 | <i>L. infantum</i> | 267 | 71   | 337  |
| LinJ11_V3.0830 | <i>L. infantum</i> | 73  | 1    | 73   |
| LinJ11_V3.0830 | <i>L. infantum</i> | 199 | 131  | 329  |
| LinJ11_V3.0830 | <i>L. infantum</i> | 102 | 348  | 449  |
| LinJ11_V3.0830 | <i>L. infantum</i> | 628 | 777  | 1404 |
| LinJ11_V3.0850 | <i>L. infantum</i> | 50  | 111  | 160  |
| LinJ11_V3.0860 | <i>L. infantum</i> | 63  | 61   | 123  |
| LinJ11_V3.0860 | <i>L. infantum</i> | 62  | 318  | 379  |
| LinJ11_V3.0860 | <i>L. infantum</i> | 97  | 643  | 739  |
| LinJ11_V3.0860 | <i>L. infantum</i> | 58  | 990  | 1047 |
| LinJ11_V3.0860 | <i>L. infantum</i> | 140 | 1117 | 1256 |
| LinJ11_V3.0860 | <i>L. infantum</i> | 140 | 1535 | 1674 |
| LinJ11_V3.0870 | <i>L. infantum</i> | 243 | 23   | 265  |
| LinJ11_V3.0870 | <i>L. infantum</i> | 65  | 296  | 360  |
| LinJ11_V3.0870 | <i>L. infantum</i> | 606 | 442  | 1047 |
| LinJ11_V3.0880 | <i>L. infantum</i> | 47  | 69   | 115  |
| LinJ11_V3.0890 | <i>L. infantum</i> | 95  | 1    | 95   |
| LinJ11_V3.0890 | <i>L. infantum</i> | 55  | 452  | 506  |
| LinJ11_V3.0890 | <i>L. infantum</i> | 41  | 616  | 656  |
| LinJ11_V3.0890 | <i>L. infantum</i> | 40  | 971  | 1010 |
| LinJ11_V3.0900 | <i>L. infantum</i> | 103 | 88   | 190  |
| LinJ11_V3.0910 | <i>L. infantum</i> | 345 | 1    | 345  |
| LinJ11_V3.0910 | <i>L. infantum</i> | 63  | 764  | 826  |
| LinJ11_V3.0910 | <i>L. infantum</i> | 66  | 915  | 980  |
| LinJ11_V3.0910 | <i>L. infantum</i> | 53  | 1017 | 1069 |
| LinJ11_V3.0910 | <i>L. infantum</i> | 53  | 1113 | 1165 |
| LinJ11_V3.0910 | <i>L. infantum</i> | 153 | 1301 | 1453 |
| LinJ11_V3.0920 | <i>L. infantum</i> | 126 | 48   | 173  |
| LinJ11_V3.0920 | <i>L. infantum</i> | 58  | 301  | 358  |
| LinJ11_V3.0920 | <i>L. infantum</i> | 169 | 452  | 620  |
| LinJ11_V3.0930 | <i>L. infantum</i> | 181 | 83   | 263  |
| LinJ11_V3.0930 | <i>L. infantum</i> | 106 | 272  | 377  |
| LinJ11_V3.0940 | <i>L. infantum</i> | 77  | 65   | 141  |
| LinJ11_V3.0940 | <i>L. infantum</i> | 76  | 182  | 257  |
| LinJ11_V3.0940 | <i>L. infantum</i> | 618 | 264  | 881  |
| LinJ11_V3.0940 | <i>L. infantum</i> | 271 | 891  | 1161 |
| LinJ11_V3.0940 | <i>L. infantum</i> | 117 | 1281 | 1397 |
| LinJ11_V3.0950 | <i>L. infantum</i> | 48  | 1    | 48   |
| LinJ11_V3.0950 | <i>L. infantum</i> | 54  | 94   | 147  |
| LinJ11_V3.0950 | <i>L. infantum</i> | 67  | 179  | 245  |
| LinJ11_V3.0950 | <i>L. infantum</i> | 150 | 264  | 413  |
| LinJ11_V3.0980 | <i>L. infantum</i> | 61  | 43   | 103  |
| LinJ11_V3.0980 | <i>L. infantum</i> | 139 | 124  | 262  |

|                |                    |     |      |      |
|----------------|--------------------|-----|------|------|
| LinJ11_V3.0980 | <i>L. infantum</i> | 86  | 355  | 440  |
| LinJ11_V3.0990 | <i>L. infantum</i> | 51  | 241  | 291  |
| LinJ11_V3.0990 | <i>L. infantum</i> | 81  | 681  | 761  |
| LinJ11_V3.0990 | <i>L. infantum</i> | 81  | 681  | 761  |
| LinJ11_V3.1000 | <i>L. infantum</i> | 53  | 304  | 356  |
| LinJ11_V3.1000 | <i>L. infantum</i> | 47  | 380  | 426  |
| LinJ11_V3.1000 | <i>L. infantum</i> | 47  | 380  | 426  |
| LinJ11_V3.1010 | <i>L. infantum</i> | 46  | 129  | 174  |
| LinJ11_V3.1010 | <i>L. infantum</i> | 67  | 228  | 294  |
| LinJ11_V3.1010 | <i>L. infantum</i> | 87  | 518  | 604  |
| LinJ11_V3.1020 | <i>L. infantum</i> | 55  | 1    | 55   |
| LinJ11_V3.1020 | <i>L. infantum</i> | 415 | 75   | 489  |
| LinJ11_V3.1020 | <i>L. infantum</i> | 160 | 493  | 652  |
| LinJ11_V3.1020 | <i>L. infantum</i> | 157 | 681  | 837  |
| LinJ11_V3.1020 | <i>L. infantum</i> | 50  | 1112 | 1161 |
| LinJ11_V3.1020 | <i>L. infantum</i> | 188 | 1354 | 1541 |
| LinJ11_V3.1020 | <i>L. infantum</i> | 163 | 1571 | 1733 |
| LinJ11_V3.1040 | <i>L. infantum</i> | 160 | 1    | 160  |
| LinJ11_V3.1040 | <i>L. infantum</i> | 62  | 240  | 301  |
| LinJ11_V3.1040 | <i>L. infantum</i> | 165 | 315  | 479  |
| LinJ11_V3.1040 | <i>L. infantum</i> | 263 | 482  | 744  |
| LinJ11_V3.1070 | <i>L. infantum</i> | 505 | 1    | 505  |
| LinJ11_V3.1080 | <i>L. infantum</i> | 76  | 1    | 76   |
| LinJ11_V3.1080 | <i>L. infantum</i> | 75  | 119  | 193  |
| LinJ11_V3.1080 | <i>L. infantum</i> | 93  | 201  | 293  |
| LinJ11_V3.1090 | <i>L. infantum</i> | 112 | 1    | 112  |
| LinJ11_V3.1110 | <i>L. infantum</i> | 81  | 67   | 147  |
| LinJ11_V3.1120 | <i>L. infantum</i> | 42  | 104  | 145  |
| LinJ11_V3.1120 | <i>L. infantum</i> | 85  | 193  | 277  |
| LinJ11_V3.1120 | <i>L. infantum</i> | 85  | 193  | 277  |
| LinJ11_V3.1130 | <i>L. infantum</i> | 81  | 67   | 147  |
| LinJ11_V3.1140 | <i>L. infantum</i> | 54  | 401  | 454  |
| LinJ11_V3.1140 | <i>L. infantum</i> | 42  | 456  | 497  |
| LinJ11_V3.1140 | <i>L. infantum</i> | 42  | 456  | 497  |
| LinJ11_V3.1160 | <i>L. infantum</i> | 318 | 1    | 318  |
| LinJ11_V3.1170 | <i>L. infantum</i> | 41  | 1    | 41   |
| LinJ11_V3.1170 | <i>L. infantum</i> | 71  | 371  | 441  |
| LinJ11_V3.1170 | <i>L. infantum</i> | 71  | 371  | 441  |
| LinJ11_V3.1190 | <i>L. infantum</i> | 48  | 356  | 403  |
| LinJ11_V3.1190 | <i>L. infantum</i> | 76  | 551  | 626  |
| LinJ11_V3.1190 | <i>L. infantum</i> | 50  | 643  | 692  |
| LinJ11_V3.1210 | <i>L. infantum</i> | 40  | 921  | 960  |
| LinJ11_V3.1210 | <i>L. infantum</i> | 46  | 1399 | 1444 |
| LinJ11_V3.1210 | <i>L. infantum</i> | 90  | 1687 | 1776 |
| LinJ11_V3.1230 | <i>L. infantum</i> | 100 | 1    | 100  |
| LinJ11_V3.1240 | <i>L. infantum</i> | 140 | 1    | 140  |
| LinJ11_V3.1240 | <i>L. infantum</i> | 41  | 1041 | 1081 |

|                |                    |     |      |      |
|----------------|--------------------|-----|------|------|
| LinJ11_V3.1240 | <i>L. infantum</i> | 43  | 1520 | 1562 |
| LinJ11_V3.1240 | <i>L. infantum</i> | 49  | 1849 | 1897 |
| LinJ11_V3.1280 | <i>L. infantum</i> | 183 | 1679 | 1861 |
| LinJ11_V3.1290 | <i>L. infantum</i> | 112 | 1    | 112  |
| LinJ11_V3.1320 | <i>L. infantum</i> | 103 | 70   | 172  |
| LinJ11_V3.1320 | <i>L. infantum</i> | 110 | 202  | 311  |
| LinJ11_V3.1320 | <i>L. infantum</i> | 47  | 366  | 412  |
| LinJ11_V3.1320 | <i>L. infantum</i> | 84  | 462  | 545  |
| LinJ11_V3.1320 | <i>L. infantum</i> | 116 | 621  | 736  |
| LinJ11_V3.1320 | <i>L. infantum</i> | 65  | 859  | 923  |
| LinJ11_V3.1320 | <i>L. infantum</i> | 124 | 1377 | 1500 |
| LinJ11_V3.1320 | <i>L. infantum</i> | 89  | 1535 | 1623 |
| LinJ11_V3.1330 | <i>L. infantum</i> | 83  | 325  | 407  |
| LinJ11_V3.1340 | <i>L. infantum</i> | 42  | 1    | 42   |
| LinJ11_V3.1340 | <i>L. infantum</i> | 99  | 79   | 177  |
| LinJ11_V3.1340 | <i>L. infantum</i> | 99  | 79   | 177  |
| LinJ11_V3.1350 | <i>L. infantum</i> | 71  | 1    | 71   |
| LinJ11_V3.1370 | <i>L. infantum</i> | 55  | 122  | 176  |
| LinJ11_V3.1370 | <i>L. infantum</i> | 41  | 215  | 255  |
| LinJ11_V3.1370 | <i>L. infantum</i> | 51  | 300  | 350  |
| LinJ12_V3.0050 | <i>L. infantum</i> | 107 | 127  | 233  |
| LinJ12_V3.0050 | <i>L. infantum</i> | 251 | 340  | 590  |
| LinJ12_V3.0060 | <i>L. infantum</i> | 232 | 351  | 582  |
| LinJ12_V3.0060 | <i>L. infantum</i> | 371 | 991  | 1361 |
| LinJ12_V3.0060 | <i>L. infantum</i> | 47  | 1364 | 1410 |
| LinJ12_V3.0070 | <i>L. infantum</i> | 140 | 1    | 140  |
| LinJ12_V3.0070 | <i>L. infantum</i> | 744 | 160  | 903  |
| LinJ12_V3.0100 | <i>L. infantum</i> | 98  | 31   | 128  |
| LinJ12_V3.0140 | <i>L. infantum</i> | 63  | 340  | 402  |
| LinJ12_V3.0140 | <i>L. infantum</i> | 49  | 473  | 521  |
| LinJ12_V3.0140 | <i>L. infantum</i> | 59  | 658  | 716  |
| LinJ12_V3.0150 | <i>L. infantum</i> | 139 | 1    | 139  |
| LinJ12_V3.0150 | <i>L. infantum</i> | 178 | 153  | 330  |
| LinJ12_V3.0160 | <i>L. infantum</i> | 96  | 120  | 215  |
| LinJ12_V3.0160 | <i>L. infantum</i> | 66  | 363  | 428  |
| LinJ12_V3.0160 | <i>L. infantum</i> | 66  | 441  | 506  |
| LinJ12_V3.0170 | <i>L. infantum</i> | 53  | 1    | 53   |
| LinJ12_V3.0170 | <i>L. infantum</i> | 99  | 99   | 197  |
| LinJ12_V3.0170 | <i>L. infantum</i> | 44  | 234  | 277  |
| LinJ12_V3.0170 | <i>L. infantum</i> | 83  | 357  | 439  |
| LinJ12_V3.0170 | <i>L. infantum</i> | 88  | 602  | 689  |
| LinJ12_V3.0170 | <i>L. infantum</i> | 122 | 865  | 986  |
| LinJ12_V3.0170 | <i>L. infantum</i> | 91  | 1012 | 1102 |
| LinJ12_V3.0170 | <i>L. infantum</i> | 57  | 1158 | 1214 |
| LinJ12_V3.0170 | <i>L. infantum</i> | 54  | 1312 | 1365 |
| LinJ12_V3.0170 | <i>L. infantum</i> | 63  | 1488 | 1550 |
| LinJ12_V3.0170 | <i>L. infantum</i> | 76  | 1570 | 1645 |

|                |                    |     |      |      |
|----------------|--------------------|-----|------|------|
| LinJ12_V3.0180 | <i>L. infantum</i> | 194 | 1    | 194  |
| LinJ12_V3.0180 | <i>L. infantum</i> | 238 | 196  | 433  |
| LinJ12_V3.0180 | <i>L. infantum</i> | 614 | 481  | 1094 |
| LinJ12_V3.0190 | <i>L. infantum</i> | 50  | 1    | 50   |
| LinJ12_V3.0210 | <i>L. infantum</i> | 92  | 1    | 92   |
| LinJ12_V3.0210 | <i>L. infantum</i> | 57  | 139  | 195  |
| LinJ12_V3.0210 | <i>L. infantum</i> | 89  | 252  | 340  |
| LinJ12_V3.0210 | <i>L. infantum</i> | 236 | 369  | 604  |
| LinJ12_V3.0210 | <i>L. infantum</i> | 62  | 653  | 714  |
| LinJ12_V3.0210 | <i>L. infantum</i> | 74  | 895  | 968  |
| LinJ12_V3.0210 | <i>L. infantum</i> | 77  | 1030 | 1106 |
| LinJ12_V3.0210 | <i>L. infantum</i> | 49  | 1163 | 1211 |
| LinJ12_V3.0210 | <i>L. infantum</i> | 43  | 1239 | 1281 |
| LinJ12_V3.0210 | <i>L. infantum</i> | 85  | 1461 | 1545 |
| LinJ12_V3.0220 | <i>L. infantum</i> | 44  | 205  | 248  |
| LinJ12_V3.0220 | <i>L. infantum</i> | 126 | 573  | 698  |
| LinJ12_V3.0240 | <i>L. infantum</i> | 55  | 1    | 55   |
| LinJ12_V3.0240 | <i>L. infantum</i> | 828 | 74   | 901  |
| LinJ12_V3.0240 | <i>L. infantum</i> | 207 | 905  | 1111 |
| LinJ12_V3.0240 | <i>L. infantum</i> | 58  | 1143 | 1200 |
| LinJ12_V3.0240 | <i>L. infantum</i> | 143 | 1406 | 1548 |
| LinJ12_V3.0250 | <i>L. infantum</i> | 122 | 544  | 665  |
| LinJ12_V3.0250 | <i>L. infantum</i> | 476 | 691  | 1166 |
| LinJ12_V3.0250 | <i>L. infantum</i> | 59  | 1236 | 1294 |
| LinJ12_V3.0250 | <i>L. infantum</i> | 103 | 1335 | 1437 |
| LinJ12_V3.0250 | <i>L. infantum</i> | 62  | 1579 | 1640 |
| LinJ12_V3.0260 | <i>L. infantum</i> | 140 | 91   | 230  |
| LinJ12_V3.0260 | <i>L. infantum</i> | 46  | 359  | 404  |
| LinJ12_V3.0260 | <i>L. infantum</i> | 44  | 464  | 507  |
| LinJ12_V3.0260 | <i>L. infantum</i> | 60  | 583  | 642  |
| LinJ12_V3.0270 | <i>L. infantum</i> | 190 | 100  | 289  |
| LinJ12_V3.0270 | <i>L. infantum</i> | 56  | 302  | 357  |
| LinJ12_V3.0270 | <i>L. infantum</i> | 51  | 451  | 501  |
| LinJ12_V3.0270 | <i>L. infantum</i> | 95  | 536  | 630  |
| LinJ12_V3.0270 | <i>L. infantum</i> | 48  | 726  | 773  |
| LinJ12_V3.0270 | <i>L. infantum</i> | 475 | 814  | 1288 |
| LinJ12_V3.0270 | <i>L. infantum</i> | 60  | 1328 | 1387 |
| LinJ12_V3.0270 | <i>L. infantum</i> | 91  | 1404 | 1494 |
| LinJ12_V3.0270 | <i>L. infantum</i> | 78  | 1523 | 1600 |
| LinJ12_V3.0270 | <i>L. infantum</i> | 93  | 1636 | 1728 |
| LinJ12_V3.0270 | <i>L. infantum</i> | 41  | 1831 | 1871 |
| LinJ12_V3.0270 | <i>L. infantum</i> | 99  | 2119 | 2217 |
| LinJ12_V3.0270 | <i>L. infantum</i> | 42  | 2303 | 2344 |
| LinJ12_V3.0270 | <i>L. infantum</i> | 201 | 2423 | 2623 |
| LinJ12_V3.0270 | <i>L. infantum</i> | 215 | 2699 | 2913 |
| LinJ12_V3.0270 | <i>L. infantum</i> | 72  | 2924 | 2995 |
| LinJ12_V3.0270 | <i>L. infantum</i> | 174 | 3057 | 3230 |

|                |                    |     |      |      |
|----------------|--------------------|-----|------|------|
| LinJ12_V3.0280 | <i>L. infantum</i> | 277 | 1    | 277  |
| LinJ12_V3.0280 | <i>L. infantum</i> | 125 | 311  | 435  |
| LinJ12_V3.0280 | <i>L. infantum</i> | 73  | 651  | 723  |
| LinJ12_V3.0280 | <i>L. infantum</i> | 52  | 866  | 917  |
| LinJ12_V3.0280 | <i>L. infantum</i> | 47  | 952  | 998  |
| LinJ12_V3.0280 | <i>L. infantum</i> | 145 | 1021 | 1165 |
| LinJ12_V3.0280 | <i>L. infantum</i> | 53  | 1191 | 1243 |
| LinJ12_V3.0290 | <i>L. infantum</i> | 451 | 1    | 451  |
| LinJ12_V3.0290 | <i>L. infantum</i> | 171 | 477  | 647  |
| LinJ12_V3.0290 | <i>L. infantum</i> | 594 | 671  | 1264 |
| LinJ12_V3.0290 | <i>L. infantum</i> | 110 | 1302 | 1411 |
| LinJ12_V3.0290 | <i>L. infantum</i> | 58  | 1442 | 1499 |
| LinJ12_V3.0290 | <i>L. infantum</i> | 50  | 1569 | 1618 |
| LinJ12_V3.0290 | <i>L. infantum</i> | 289 | 1654 | 1942 |
| LinJ12_V3.0300 | <i>L. infantum</i> | 343 | 1    | 343  |
| LinJ12_V3.0300 | <i>L. infantum</i> | 58  | 504  | 561  |
| LinJ12_V3.0310 | <i>L. infantum</i> | 99  | 199  | 297  |
| LinJ12_V3.0320 | <i>L. infantum</i> | 132 | 155  | 286  |
| LinJ12_V3.0330 | <i>L. infantum</i> | 114 | 1    | 114  |
| LinJ12_V3.0330 | <i>L. infantum</i> | 125 | 177  | 301  |
| LinJ12_V3.0330 | <i>L. infantum</i> | 99  | 326  | 424  |
| LinJ12_V3.0330 | <i>L. infantum</i> | 552 | 430  | 981  |
| LinJ12_V3.0330 | <i>L. infantum</i> | 69  | 1014 | 1082 |
| LinJ12_V3.0340 | <i>L. infantum</i> | 49  | 330  | 378  |
| LinJ12_V3.0360 | <i>L. infantum</i> | 333 | 1    | 333  |
| LinJ12_V3.0390 | <i>L. infantum</i> | 57  | 38   | 94   |
| LinJ12_V3.0390 | <i>L. infantum</i> | 213 | 206  | 418  |
| LinJ12_V3.0390 | <i>L. infantum</i> | 104 | 507  | 610  |
| LinJ12_V3.0400 | <i>L. infantum</i> | 100 | 189  | 288  |
| LinJ12_V3.0400 | <i>L. infantum</i> | 161 | 308  | 468  |
| LinJ12_V3.0400 | <i>L. infantum</i> | 161 | 491  | 651  |
| LinJ12_V3.0410 | <i>L. infantum</i> | 366 | 1    | 366  |
| LinJ12_V3.0410 | <i>L. infantum</i> | 46  | 375  | 420  |
| LinJ12_V3.0410 | <i>L. infantum</i> | 113 | 447  | 559  |
| LinJ12_V3.0410 | <i>L. infantum</i> | 426 | 664  | 1089 |
| LinJ12_V3.0420 | <i>L. infantum</i> | 525 | 1    | 525  |
| LinJ12_V3.0420 | <i>L. infantum</i> | 60  | 555  | 614  |
| LinJ12_V3.0420 | <i>L. infantum</i> | 167 | 618  | 784  |
| LinJ12_V3.0430 | <i>L. infantum</i> | 414 | 1    | 414  |
| LinJ12_V3.0430 | <i>L. infantum</i> | 158 | 439  | 596  |
| LinJ12_V3.0430 | <i>L. infantum</i> | 65  | 670  | 734  |
| LinJ12_V3.0440 | <i>L. infantum</i> | 325 | 1    | 325  |
| LinJ12_V3.0440 | <i>L. infantum</i> | 163 | 447  | 609  |
| LinJ12_V3.0450 | <i>L. infantum</i> | 40  | 1    | 40   |
| LinJ12_V3.0450 | <i>L. infantum</i> | 143 | 62   | 204  |
| LinJ12_V3.0450 | <i>L. infantum</i> | 61  | 240  | 300  |
| LinJ12_V3.0460 | <i>L. infantum</i> | 119 | 42   | 160  |

|                |                    |     |      |      |
|----------------|--------------------|-----|------|------|
| LinJ12_V3.0460 | <i>L. infantum</i> | 68  | 181  | 248  |
| LinJ12_V3.0460 | <i>L. infantum</i> | 206 | 285  | 490  |
| LinJ12_V3.0460 | <i>L. infantum</i> | 175 | 538  | 712  |
| LinJ12_V3.0460 | <i>L. infantum</i> | 60  | 755  | 814  |
| LinJ12_V3.0460 | <i>L. infantum</i> | 233 | 816  | 1048 |
| LinJ12_V3.0460 | <i>L. infantum</i> | 59  | 1062 | 1120 |
| LinJ12_V3.0460 | <i>L. infantum</i> | 63  | 1135 | 1197 |
| LinJ12_V3.0460 | <i>L. infantum</i> | 51  | 1228 | 1278 |
| LinJ12_V3.0460 | <i>L. infantum</i> | 65  | 1322 | 1386 |
| LinJ12_V3.0460 | <i>L. infantum</i> | 67  | 1407 | 1473 |
| LinJ12_V3.0470 | <i>L. infantum</i> | 713 | 62   | 774  |
| LinJ12_V3.0470 | <i>L. infantum</i> | 54  | 777  | 830  |
| LinJ12_V3.0470 | <i>L. infantum</i> | 77  | 893  | 969  |
| LinJ12_V3.0500 | <i>L. infantum</i> | 76  | 1    | 76   |
| LinJ12_V3.0510 | <i>L. infantum</i> | 94  | 41   | 134  |
| LinJ12_V3.0510 | <i>L. infantum</i> | 241 | 166  | 406  |
| LinJ12_V3.0510 | <i>L. infantum</i> | 86  | 414  | 499  |
| LinJ12_V3.0520 | <i>L. infantum</i> | 46  | 1    | 46   |
| LinJ12_V3.0520 | <i>L. infantum</i> | 122 | 219  | 340  |
| LinJ12_V3.0520 | <i>L. infantum</i> | 47  | 496  | 542  |
| LinJ12_V3.0520 | <i>L. infantum</i> | 423 | 624  | 1046 |
| LinJ12_V3.0530 | <i>L. infantum</i> | 161 | 331  | 491  |
| LinJ12_V3.0530 | <i>L. infantum</i> | 122 | 513  | 634  |
| LinJ12_V3.0530 | <i>L. infantum</i> | 215 | 651  | 865  |
| LinJ12_V3.0530 | <i>L. infantum</i> | 187 | 867  | 1053 |
| LinJ12_V3.0540 | <i>L. infantum</i> | 289 | 1    | 289  |
| LinJ12_V3.0540 | <i>L. infantum</i> | 43  | 913  | 955  |
| LinJ12_V3.0540 | <i>L. infantum</i> | 60  | 1138 | 1197 |
| LinJ12_V3.0540 | <i>L. infantum</i> | 47  | 1275 | 1321 |
| LinJ12_V3.0540 | <i>L. infantum</i> | 142 | 1351 | 1492 |
| LinJ12_V3.0540 | <i>L. infantum</i> | 206 | 1507 | 1712 |
| LinJ12_V3.0540 | <i>L. infantum</i> | 72  | 1752 | 1823 |
| LinJ12_V3.0550 | <i>L. infantum</i> | 54  | 1    | 54   |
| LinJ12_V3.0550 | <i>L. infantum</i> | 42  | 180  | 221  |
| LinJ12_V3.0550 | <i>L. infantum</i> | 57  | 254  | 310  |
| LinJ12_V3.0560 | <i>L. infantum</i> | 178 | 179  | 356  |
| LinJ12_V3.0560 | <i>L. infantum</i> | 65  | 451  | 515  |
| LinJ12_V3.0560 | <i>L. infantum</i> | 153 | 792  | 944  |
| LinJ12_V3.0560 | <i>L. infantum</i> | 53  | 961  | 1013 |
| LinJ12_V3.0570 | <i>L. infantum</i> | 183 | 1    | 183  |
| LinJ12_V3.0570 | <i>L. infantum</i> | 645 | 195  | 839  |
| LinJ12_V3.0570 | <i>L. infantum</i> | 369 | 865  | 1233 |
| LinJ12_V3.0570 | <i>L. infantum</i> | 221 | 1244 | 1464 |
| LinJ12_V3.0590 | <i>L. infantum</i> | 86  | 177  | 262  |
| LinJ12_V3.0590 | <i>L. infantum</i> | 52  | 309  | 360  |
| LinJ12_V3.0600 | <i>L. infantum</i> | 617 | 1    | 617  |
| LinJ12_V3.0610 | <i>L. infantum</i> | 70  | 1    | 70   |



|                |                    |     |      |      |
|----------------|--------------------|-----|------|------|
| LinJ12_V3.0620 | <i>L. infantum</i> | 85  | 241  | 325  |
| LinJ12_V3.0630 | <i>L. infantum</i> | 42  | 135  | 176  |
| LinJ12_V3.0630 | <i>L. infantum</i> | 55  | 328  | 382  |
| LinJ12_V3.0640 | <i>L. infantum</i> | 105 | 60   | 164  |
| LinJ12_V3.0650 | <i>L. infantum</i> | 55  | 119  | 173  |
| LinJ12_V3.0650 | <i>L. infantum</i> | 55  | 230  | 284  |
| LinJ12_V3.0650 | <i>L. infantum</i> | 65  | 402  | 466  |
| LinJ12_V3.0650 | <i>L. infantum</i> | 173 | 678  | 850  |
| LinJ12_V3.0690 | <i>L. infantum</i> | 105 | 150  | 254  |
| LinJ12_V3.0690 | <i>L. infantum</i> | 55  | 283  | 337  |
| LinJ12_V3.0690 | <i>L. infantum</i> | 55  | 283  | 337  |
| LinJ12_V3.0700 | <i>L. infantum</i> | 43  | 1    | 43   |
| LinJ12_V3.0700 | <i>L. infantum</i> | 95  | 128  | 222  |
| LinJ12_V3.0700 | <i>L. infantum</i> | 60  | 261  | 320  |
| LinJ12_V3.0700 | <i>L. infantum</i> | 356 | 372  | 727  |
| LinJ12_V3.0700 | <i>L. infantum</i> | 61  | 751  | 811  |
| LinJ12_V3.0700 | <i>L. infantum</i> | 50  | 829  | 878  |
| LinJ12_V3.0700 | <i>L. infantum</i> | 225 | 913  | 1137 |
| LinJ12_V3.0700 | <i>L. infantum</i> | 154 | 1431 | 1584 |
| LinJ12_V3.0710 | <i>L. infantum</i> | 293 | 32   | 324  |
| LinJ12_V3.0710 | <i>L. infantum</i> | 174 | 336  | 509  |
| LinJ12_V3.0710 | <i>L. infantum</i> | 52  | 557  | 608  |
| LinJ12_V3.0720 | <i>L. infantum</i> | 299 | 152  | 450  |
| LinJ12_V3.0720 | <i>L. infantum</i> | 120 | 464  | 583  |
| LinJ12_V3.0720 | <i>L. infantum</i> | 262 | 718  | 979  |
| LinJ12_V3.0720 | <i>L. infantum</i> | 108 | 981  | 1088 |
| LinJ12_V3.0740 | <i>L. infantum</i> | 76  | 375  | 450  |
| LinJ12_V3.0740 | <i>L. infantum</i> | 47  | 782  | 828  |
| LinJ12_V3.0740 | <i>L. infantum</i> | 47  | 782  | 828  |
| LinJ12_V3.0750 | <i>L. infantum</i> | 181 | 46   | 226  |
| LinJ12_V3.0750 | <i>L. infantum</i> | 415 | 281  | 695  |
| LinJ12_V3.0750 | <i>L. infantum</i> | 163 | 780  | 942  |
| LinJ12_V3.0750 | <i>L. infantum</i> | 41  | 960  | 1000 |
| LinJ12_V3.0760 | <i>L. infantum</i> | 113 | 198  | 310  |
| LinJ12_V3.0760 | <i>L. infantum</i> | 106 | 326  | 431  |
| LinJ12_V3.0760 | <i>L. infantum</i> | 260 | 688  | 947  |
| LinJ12_V3.0770 | <i>L. infantum</i> | 58  | 176  | 233  |
| LinJ12_V3.0770 | <i>L. infantum</i> | 46  | 239  | 284  |
| LinJ12_V3.0770 | <i>L. infantum</i> | 178 | 523  | 700  |
| LinJ12_V3.0780 | <i>L. infantum</i> | 366 | 30   | 395  |
| LinJ12_V3.0780 | <i>L. infantum</i> | 65  | 471  | 535  |
| LinJ12_V3.0780 | <i>L. infantum</i> | 59  | 655  | 713  |
| LinJ12_V3.0780 | <i>L. infantum</i> | 52  | 813  | 864  |
| LinJ12_V3.0790 | <i>L. infantum</i> | 50  | 1    | 50   |
| LinJ12_V3.0790 | <i>L. infantum</i> | 63  | 155  | 217  |
| LinJ12_V3.0790 | <i>L. infantum</i> | 49  | 277  | 325  |
| LinJ12_V3.0790 | <i>L. infantum</i> | 92  | 498  | 589  |

|                |                    |     |      |      |
|----------------|--------------------|-----|------|------|
| LinJ12_V3.0790 | <i>L. infantum</i> | 58  | 1041 | 1098 |
| LinJ12_V3.0790 | <i>L. infantum</i> | 102 | 1138 | 1239 |
| LinJ12_V3.0790 | <i>L. infantum</i> | 52  | 1275 | 1326 |
| LinJ12_V3.0790 | <i>L. infantum</i> | 40  | 1337 | 1376 |
| LinJ12_V3.0800 | <i>L. infantum</i> | 196 | 238  | 433  |
| LinJ12_V3.0820 | <i>L. infantum</i> | 80  | 1    | 80   |
| LinJ12_V3.0820 | <i>L. infantum</i> | 70  | 107  | 176  |
| LinJ12_V3.0820 | <i>L. infantum</i> | 66  | 286  | 351  |
| LinJ12_V3.0820 | <i>L. infantum</i> | 107 | 413  | 519  |
| LinJ12_V3.0820 | <i>L. infantum</i> | 83  | 638  | 720  |
| LinJ12_V3.0830 | <i>L. infantum</i> | 44  | 237  | 280  |
| LinJ12_V3.0830 | <i>L. infantum</i> | 54  | 667  | 720  |
| LinJ12_V3.0830 | <i>L. infantum</i> | 177 | 900  | 1076 |
| LinJ12_V3.0830 | <i>L. infantum</i> | 47  | 1257 | 1303 |
| LinJ12_V3.0840 | <i>L. infantum</i> | 116 | 68   | 183  |
| LinJ12_V3.0840 | <i>L. infantum</i> | 43  | 397  | 439  |
| LinJ12_V3.0860 | <i>L. infantum</i> | 623 | 1    | 623  |
| LinJ12_V3.0870 | <i>L. infantum</i> | 62  | 152  | 213  |
| LinJ12_V3.0880 | <i>L. infantum</i> | 63  | 226  | 288  |
| LinJ12_V3.0920 | <i>L. infantum</i> | 50  | 492  | 541  |
| LinJ12_V3.0930 | <i>L. infantum</i> | 239 | 103  | 341  |
| LinJ12_V3.0930 | <i>L. infantum</i> | 49  | 390  | 438  |
| LinJ12_v4.0070 | <i>L. infantum</i> | 56  | 61   | 116  |
| LinJ12_v4.0070 | <i>L. infantum</i> | 426 | 150  | 575  |
| LinJ12_v4.0080 | <i>L. infantum</i> | 78  | 1    | 78   |
| LinJ12_v4.0100 | <i>L. infantum</i> | 67  | 136  | 202  |
| LinJ12_v4.0110 | <i>L. infantum</i> | 169 | 79   | 247  |
| LinJ12_v4.0110 | <i>L. infantum</i> | 468 | 276  | 743  |
| LinJ12_v4.0110 | <i>L. infantum</i> | 108 | 793  | 900  |
| LinJ12_v4.0120 | <i>L. infantum</i> | 44  | 57   | 100  |
| LinJ12_v4.0120 | <i>L. infantum</i> | 243 | 121  | 363  |
| LinJ12_v4.0120 | <i>L. infantum</i> | 969 | 402  | 1370 |
| LinJ12_v4.0130 | <i>L. infantum</i> | 101 | 254  | 354  |
| LinJ12_v4.0130 | <i>L. infantum</i> | 59  | 473  | 531  |
| LinJ12_v4.0140 | <i>L. infantum</i> | 44  | 1    | 44   |
| LinJ12_v4.0140 | <i>L. infantum</i> | 129 | 455  | 583  |
| LinJ12_v4.0140 | <i>L. infantum</i> | 129 | 455  | 583  |
| LinJ12_v4.0150 | <i>L. infantum</i> | 307 | 1    | 307  |
| LinJ12_v4.0150 | <i>L. infantum</i> | 207 | 476  | 682  |
| LinJ12_v4.0150 | <i>L. infantum</i> | 82  | 707  | 788  |
| LinJ12_v4.0150 | <i>L. infantum</i> | 71  | 832  | 902  |
| LinJ12_v4.0150 | <i>L. infantum</i> | 181 | 1182 | 1362 |
| LinJ12_v4.0255 | <i>L. infantum</i> | 50  | 146  | 195  |
| LinJ12_v4.0255 | <i>L. infantum</i> | 57  | 303  | 359  |
| LinJ12_v4.0255 | <i>L. infantum</i> | 57  | 303  | 359  |
| LinJ12_v4.0260 | <i>L. infantum</i> | 228 | 61   | 288  |
| LinJ12_v4.0260 | <i>L. infantum</i> | 54  | 408  | 461  |

|                |                    |     |      |      |
|----------------|--------------------|-----|------|------|
| LinJ12_v4.0260 | <i>L. infantum</i> | 45  | 650  | 694  |
| LinJ12_v4.0260 | <i>L. infantum</i> | 48  | 775  | 822  |
| LinJ12_v4.0260 | <i>L. infantum</i> | 63  | 867  | 929  |
| LinJ12_v4.0260 | <i>L. infantum</i> | 56  | 1048 | 1103 |
| LinJ12_v4.0260 | <i>L. infantum</i> | 41  | 1177 | 1217 |
| LinJ12_v4.0260 | <i>L. infantum</i> | 75  | 1242 | 1316 |
| LinJ12_v4.0260 | <i>L. infantum</i> | 45  | 1448 | 1492 |
| LinJ12_v4.0260 | <i>L. infantum</i> | 47  | 1584 | 1630 |
| LinJ12_v4.0260 | <i>L. infantum</i> | 44  | 1744 | 1787 |
| LinJ12_v4.0260 | <i>L. infantum</i> | 86  | 1807 | 1892 |
| LinJ12_v4.0260 | <i>L. infantum</i> | 235 | 1927 | 2161 |
| LinJ12_v4.0260 | <i>L. infantum</i> | 57  | 2193 | 2249 |
| LinJ12_v4.0260 | <i>L. infantum</i> | 97  | 2422 | 2518 |
| LinJ12_v4.0260 | <i>L. infantum</i> | 49  | 2612 | 2660 |
| LinJ12_v4.0260 | <i>L. infantum</i> | 58  | 2764 | 2821 |
| LinJ12_v4.0260 | <i>L. infantum</i> | 83  | 2848 | 2930 |
| LinJ12_v4.0270 | <i>L. infantum</i> | 112 | 63   | 174  |
| LinJ12_v4.0270 | <i>L. infantum</i> | 76  | 232  | 307  |
| LinJ12_v4.0270 | <i>L. infantum</i> | 64  | 402  | 465  |
| LinJ12_v4.0661 | <i>L. infantum</i> | 93  | 219  | 311  |
| LinJ12_v4.0661 | <i>L. infantum</i> | 112 | 328  | 439  |
| LinJ12_v4.0662 | <i>L. infantum</i> | 41  | 18   | 58   |
| LinJ12_v4.0662 | <i>L. infantum</i> | 95  | 106  | 200  |
| LinJ12_v4.0662 | <i>L. infantum</i> | 95  | 106  | 200  |
| LinJ12_v4.0663 | <i>L. infantum</i> | 47  | 366  | 412  |
| LinJ12_v4.0663 | <i>L. infantum</i> | 159 | 458  | 616  |
| LinJ12_v4.0664 | <i>L. infantum</i> | 93  | 219  | 311  |
| LinJ12_v4.0664 | <i>L. infantum</i> | 112 | 328  | 439  |
| LinJ12_v4.0665 | <i>L. infantum</i> | 147 | 136  | 282  |
| LinJ12_v4.0665 | <i>L. infantum</i> | 55  | 362  | 416  |
| LinJ12_v4.0665 | <i>L. infantum</i> | 55  | 362  | 416  |
| LinJ12_v4.0666 | <i>L. infantum</i> | 109 | 145  | 253  |
| LinJ12_v4.0666 | <i>L. infantum</i> | 94  | 287  | 380  |
| LinJ12_v4.0667 | <i>L. infantum</i> | 213 | 45   | 257  |
| LinJ12_v4.0668 | <i>L. infantum</i> | 40  | 138  | 177  |
| LinJ12_v4.0668 | <i>L. infantum</i> | 91  | 304  | 394  |
| LinJ12_v4.0668 | <i>L. infantum</i> | 163 | 422  | 584  |
| LinJ12_v4.0669 | <i>L. infantum</i> | 92  | 219  | 310  |
| LinJ12_v4.0669 | <i>L. infantum</i> | 112 | 328  | 439  |
| LinJ12_v4.0670 | <i>L. infantum</i> | 41  | 195  | 235  |
| LinJ12_v4.0670 | <i>L. infantum</i> | 87  | 317  | 403  |
| LinJ12_v4.0671 | <i>L. infantum</i> | 107 | 315  | 421  |
| LinJ12_v4.0671 | <i>L. infantum</i> | 42  | 500  | 541  |
| LinJ12_v4.0671 | <i>L. infantum</i> | 42  | 500  | 541  |
| LinJ13_V3.0010 | <i>L. infantum</i> | 48  | 76   | 123  |
| LinJ13_V3.0020 | <i>L. infantum</i> | 40  | 286  | 325  |
| LinJ13_V3.0040 | <i>L. infantum</i> | 156 | 1    | 156  |

|                |                    |     |      |      |
|----------------|--------------------|-----|------|------|
| LinJ13_V3.0060 | <i>L. infantum</i> | 104 | 14   | 117  |
| LinJ13_V3.0060 | <i>L. infantum</i> | 97  | 148  | 244  |
| LinJ13_V3.0060 | <i>L. infantum</i> | 148 | 247  | 394  |
| LinJ13_V3.0060 | <i>L. infantum</i> | 123 | 397  | 519  |
| LinJ13_V3.0070 | <i>L. infantum</i> | 223 | 68   | 290  |
| LinJ13_V3.0080 | <i>L. infantum</i> | 42  | 1    | 42   |
| LinJ13_V3.0080 | <i>L. infantum</i> | 62  | 1369 | 1430 |
| LinJ13_V3.0080 | <i>L. infantum</i> | 62  | 1369 | 1430 |
| LinJ13_V3.0100 | <i>L. infantum</i> | 50  | 20   | 69   |
| LinJ13_V3.0100 | <i>L. infantum</i> | 237 | 200  | 436  |
| LinJ13_V3.0110 | <i>L. infantum</i> | 43  | 33   | 75   |
| LinJ13_V3.0110 | <i>L. infantum</i> | 43  | 310  | 352  |
| LinJ13_V3.0110 | <i>L. infantum</i> | 43  | 310  | 352  |
| LinJ13_V3.0120 | <i>L. infantum</i> | 57  | 1    | 57   |
| LinJ13_V3.0130 | <i>L. infantum</i> | 67  | 1    | 67   |
| LinJ13_V3.0130 | <i>L. infantum</i> | 55  | 240  | 294  |
| LinJ13_V3.0130 | <i>L. infantum</i> | 77  | 390  | 466  |
| LinJ13_V3.0130 | <i>L. infantum</i> | 135 | 515  | 649  |
| LinJ13_V3.0140 | <i>L. infantum</i> | 44  | 61   | 104  |
| LinJ13_V3.0150 | <i>L. infantum</i> | 146 | 69   | 214  |
| LinJ13_V3.0170 | <i>L. infantum</i> | 46  | 135  | 180  |
| LinJ13_V3.0170 | <i>L. infantum</i> | 82  | 495  | 576  |
| LinJ13_V3.0180 | <i>L. infantum</i> | 63  | 39   | 101  |
| LinJ13_V3.0180 | <i>L. infantum</i> | 60  | 178  | 237  |
| LinJ13_V3.0180 | <i>L. infantum</i> | 60  | 178  | 237  |
| LinJ13_V3.0190 | <i>L. infantum</i> | 75  | 21   | 95   |
| LinJ13_V3.0190 | <i>L. infantum</i> | 62  | 128  | 189  |
| LinJ13_V3.0200 | <i>L. infantum</i> | 107 | 1    | 107  |
| LinJ13_V3.0200 | <i>L. infantum</i> | 43  | 188  | 230  |
| LinJ13_V3.0200 | <i>L. infantum</i> | 56  | 627  | 682  |
| LinJ13_V3.0210 | <i>L. infantum</i> | 192 | 392  | 583  |
| LinJ13_V3.0230 | <i>L. infantum</i> | 327 | 93   | 419  |
| LinJ13_V3.0240 | <i>L. infantum</i> | 58  | 1    | 58   |
| LinJ13_V3.0240 | <i>L. infantum</i> | 57  | 64   | 120  |
| LinJ13_V3.0240 | <i>L. infantum</i> | 76  | 153  | 228  |
| LinJ13_V3.0250 | <i>L. infantum</i> | 63  | 65   | 127  |
| LinJ13_V3.0260 | <i>L. infantum</i> | 99  | 162  | 260  |
| LinJ13_V3.0290 | <i>L. infantum</i> | 68  | 290  | 357  |
| LinJ13_V3.0290 | <i>L. infantum</i> | 130 | 366  | 495  |
| LinJ13_V3.0290 | <i>L. infantum</i> | 61  | 538  | 598  |
| LinJ13_V3.0310 | <i>L. infantum</i> | 42  | 37   | 78   |
| LinJ13_V3.0310 | <i>L. infantum</i> | 75  | 661  | 735  |
| LinJ13_V3.0310 | <i>L. infantum</i> | 61  | 867  | 927  |
| LinJ13_V3.0320 | <i>L. infantum</i> | 245 | 19   | 263  |
| LinJ13_V3.0320 | <i>L. infantum</i> | 100 | 1397 | 1496 |
| LinJ13_V3.0320 | <i>L. infantum</i> | 181 | 1791 | 1971 |
| LinJ13_V3.0340 | <i>L. infantum</i> | 70  | 118  | 187  |

|                |                    |     |      |      |
|----------------|--------------------|-----|------|------|
| LinJ13_V3.0340 | <i>L. infantum</i> | 179 | 287  | 465  |
| LinJ13_V3.0340 | <i>L. infantum</i> | 62  | 520  | 581  |
| LinJ13_V3.0340 | <i>L. infantum</i> | 67  | 653  | 719  |
| LinJ13_V3.0340 | <i>L. infantum</i> | 94  | 956  | 1049 |
| LinJ13_V3.0360 | <i>L. infantum</i> | 100 | 393  | 492  |
| LinJ13_V3.0370 | <i>L. infantum</i> | 113 | 1    | 113  |
| LinJ13_V3.0370 | <i>L. infantum</i> | 145 | 139  | 283  |
| LinJ13_V3.0370 | <i>L. infantum</i> | 128 | 299  | 426  |
| LinJ13_V3.0380 | <i>L. infantum</i> | 67  | 1    | 67   |
| LinJ13_V3.0380 | <i>L. infantum</i> | 54  | 267  | 320  |
| LinJ13_V3.0380 | <i>L. infantum</i> | 42  | 435  | 476  |
| LinJ13_V3.0390 | <i>L. infantum</i> | 138 | 1    | 138  |
| LinJ13_V3.0390 | <i>L. infantum</i> | 72  | 158  | 229  |
| LinJ13_V3.0410 | <i>L. infantum</i> | 186 | 1    | 186  |
| LinJ13_V3.0420 | <i>L. infantum</i> | 253 | 1    | 253  |
| LinJ13_V3.0420 | <i>L. infantum</i> | 110 | 255  | 364  |
| LinJ13_V3.0420 | <i>L. infantum</i> | 48  | 381  | 428  |
| LinJ13_V3.0420 | <i>L. infantum</i> | 214 | 521  | 734  |
| LinJ13_V3.0420 | <i>L. infantum</i> | 135 | 777  | 911  |
| LinJ13_V3.0420 | <i>L. infantum</i> | 285 | 936  | 1220 |
| LinJ13_V3.0440 | <i>L. infantum</i> | 60  | 87   | 146  |
| LinJ13_V3.0440 | <i>L. infantum</i> | 157 | 202  | 358  |
| LinJ13_V3.0440 | <i>L. infantum</i> | 91  | 528  | 618  |
| LinJ13_V3.0450 | <i>L. infantum</i> | 51  | 148  | 198  |
| LinJ13_V3.0470 | <i>L. infantum</i> | 212 | 1    | 212  |
| LinJ13_V3.0470 | <i>L. infantum</i> | 96  | 271  | 366  |
| LinJ13_V3.0470 | <i>L. infantum</i> | 75  | 617  | 691  |
| LinJ13_V3.0470 | <i>L. infantum</i> | 158 | 819  | 976  |
| LinJ13_V3.0470 | <i>L. infantum</i> | 73  | 987  | 1059 |
| LinJ13_V3.0470 | <i>L. infantum</i> | 92  | 1074 | 1165 |
| LinJ13_V3.0470 | <i>L. infantum</i> | 42  | 1200 | 1241 |
| LinJ13_V3.0470 | <i>L. infantum</i> | 54  | 1340 | 1393 |
| LinJ13_V3.0470 | <i>L. infantum</i> | 42  | 1433 | 1474 |
| LinJ13_V3.0470 | <i>L. infantum</i> | 62  | 1517 | 1578 |
| LinJ13_V3.0470 | <i>L. infantum</i> | 49  | 1601 | 1649 |
| LinJ13_V3.0490 | <i>L. infantum</i> | 88  | 1    | 88   |
| LinJ13_V3.0490 | <i>L. infantum</i> | 45  | 111  | 155  |
| LinJ13_V3.0490 | <i>L. infantum</i> | 45  | 111  | 155  |
| LinJ13_V3.0500 | <i>L. infantum</i> | 69  | 123  | 191  |
| LinJ13_V3.0510 | <i>L. infantum</i> | 349 | 41   | 389  |
| LinJ13_V3.0530 | <i>L. infantum</i> | 41  | 776  | 816  |
| LinJ13_V3.0530 | <i>L. infantum</i> | 153 | 1119 | 1271 |
| LinJ13_V3.0540 | <i>L. infantum</i> | 155 | 98   | 252  |
| LinJ13_V3.0540 | <i>L. infantum</i> | 56  | 413  | 468  |
| LinJ13_V3.0540 | <i>L. infantum</i> | 84  | 524  | 607  |
| LinJ13_V3.0560 | <i>L. infantum</i> | 196 | 253  | 448  |
| LinJ13_V3.0570 | <i>L. infantum</i> | 162 | 1    | 162  |

|                |                    |     |      |      |
|----------------|--------------------|-----|------|------|
| LinJ13_V3.0570 | <i>L. infantum</i> | 71  | 504  | 574  |
| LinJ13_V3.0580 | <i>L. infantum</i> | 149 | 43   | 191  |
| LinJ13_V3.0580 | <i>L. infantum</i> | 558 | 213  | 770  |
| LinJ13_V3.0580 | <i>L. infantum</i> | 42  | 820  | 861  |
| LinJ13_V3.0590 | <i>L. infantum</i> | 49  | 1    | 49   |
| LinJ13_V3.0590 | <i>L. infantum</i> | 463 | 99   | 561  |
| LinJ13_V3.0590 | <i>L. infantum</i> | 68  | 623  | 690  |
| LinJ13_V3.0590 | <i>L. infantum</i> | 134 | 780  | 913  |
| LinJ13_V3.0590 | <i>L. infantum</i> | 124 | 991  | 1114 |
| LinJ13_V3.0590 | <i>L. infantum</i> | 43  | 1209 | 1251 |
| LinJ13_V3.0600 | <i>L. infantum</i> | 300 | 132  | 431  |
| LinJ13_V3.0620 | <i>L. infantum</i> | 368 | 73   | 440  |
| LinJ13_V3.0620 | <i>L. infantum</i> | 65  | 465  | 529  |
| LinJ13_V3.0620 | <i>L. infantum</i> | 248 | 600  | 847  |
| LinJ13_V3.0630 | <i>L. infantum</i> | 116 | 1    | 116  |
| LinJ13_V3.0630 | <i>L. infantum</i> | 48  | 730  | 777  |
| LinJ13_V3.0630 | <i>L. infantum</i> | 48  | 730  | 777  |
| LinJ13_V3.0640 | <i>L. infantum</i> | 138 | 1    | 138  |
| LinJ13_V3.0650 | <i>L. infantum</i> | 221 | 149  | 369  |
| LinJ13_V3.0650 | <i>L. infantum</i> | 295 | 517  | 811  |
| LinJ13_V3.0650 | <i>L. infantum</i> | 291 | 1087 | 1377 |
| LinJ13_V3.0650 | <i>L. infantum</i> | 78  | 1453 | 1530 |
| LinJ13_V3.0650 | <i>L. infantum</i> | 69  | 1595 | 1663 |
| LinJ13_V3.0650 | <i>L. infantum</i> | 50  | 1686 | 1735 |
| LinJ13_V3.0650 | <i>L. infantum</i> | 108 | 1788 | 1895 |
| LinJ13_V3.0670 | <i>L. infantum</i> | 97  | 312  | 408  |
| LinJ13_V3.0680 | <i>L. infantum</i> | 107 | 71   | 177  |
| LinJ13_V3.0680 | <i>L. infantum</i> | 86  | 181  | 266  |
| LinJ13_V3.0680 | <i>L. infantum</i> | 68  | 307  | 374  |
| LinJ13_V3.0680 | <i>L. infantum</i> | 49  | 498  | 546  |
| LinJ13_V3.0680 | <i>L. infantum</i> | 54  | 581  | 634  |
| LinJ13_V3.0690 | <i>L. infantum</i> | 40  | 1    | 40   |
| LinJ13_V3.0690 | <i>L. infantum</i> | 128 | 96   | 223  |
| LinJ13_V3.0690 | <i>L. infantum</i> | 128 | 96   | 223  |
| LinJ13_V3.0700 | <i>L. infantum</i> | 185 | 1    | 185  |
| LinJ13_V3.0700 | <i>L. infantum</i> | 393 | 214  | 606  |
| LinJ13_V3.0700 | <i>L. infantum</i> | 183 | 628  | 810  |
| LinJ13_V3.0700 | <i>L. infantum</i> | 118 | 860  | 977  |
| LinJ13_V3.0700 | <i>L. infantum</i> | 131 | 1000 | 1130 |
| LinJ13_V3.0700 | <i>L. infantum</i> | 98  | 1232 | 1329 |
| LinJ13_V3.0700 | <i>L. infantum</i> | 138 | 1346 | 1483 |
| LinJ13_V3.0700 | <i>L. infantum</i> | 240 | 1493 | 1732 |
| LinJ13_V3.0700 | <i>L. infantum</i> | 114 | 1796 | 1909 |
| LinJ13_V3.0700 | <i>L. infantum</i> | 77  | 1955 | 2031 |
| LinJ13_V3.0700 | <i>L. infantum</i> | 52  | 2318 | 2369 |
| LinJ13_V3.0700 | <i>L. infantum</i> | 148 | 2405 | 2552 |
| LinJ13_V3.0720 | <i>L. infantum</i> | 124 | 1    | 124  |

|                |                    |     |      |      |
|----------------|--------------------|-----|------|------|
| LinJ13_V3.0720 | <i>L. infantum</i> | 167 | 136  | 302  |
| LinJ13_V3.0720 | <i>L. infantum</i> | 113 | 433  | 545  |
| LinJ13_V3.0720 | <i>L. infantum</i> | 192 | 582  | 773  |
| LinJ13_V3.0720 | <i>L. infantum</i> | 54  | 1183 | 1236 |
| LinJ13_V3.0730 | <i>L. infantum</i> | 85  | 1    | 85   |
| LinJ13_V3.0730 | <i>L. infantum</i> | 104 | 125  | 228  |
| LinJ13_V3.0730 | <i>L. infantum</i> | 56  | 268  | 323  |
| LinJ13_V3.0730 | <i>L. infantum</i> | 176 | 352  | 527  |
| LinJ13_V3.0730 | <i>L. infantum</i> | 59  | 554  | 612  |
| LinJ13_V3.0730 | <i>L. infantum</i> | 232 | 670  | 901  |
| LinJ13_V3.0730 | <i>L. infantum</i> | 263 | 903  | 1165 |
| LinJ13_V3.0740 | <i>L. infantum</i> | 502 | 1    | 502  |
| LinJ13_V3.0740 | <i>L. infantum</i> | 112 | 587  | 698  |
| LinJ13_V3.0740 | <i>L. infantum</i> | 123 | 732  | 854  |
| LinJ13_V3.0740 | <i>L. infantum</i> | 162 | 882  | 1043 |
| LinJ13_V3.0750 | <i>L. infantum</i> | 98  | 15   | 112  |
| LinJ13_V3.0750 | <i>L. infantum</i> | 193 | 138  | 330  |
| LinJ13_V3.0750 | <i>L. infantum</i> | 50  | 343  | 392  |
| LinJ13_V3.0770 | <i>L. infantum</i> | 278 | 79   | 356  |
| LinJ13_V3.0770 | <i>L. infantum</i> | 242 | 453  | 694  |
| LinJ13_V3.0780 | <i>L. infantum</i> | 58  | 1    | 58   |
| LinJ13_V3.0780 | <i>L. infantum</i> | 75  | 105  | 179  |
| LinJ13_V3.0780 | <i>L. infantum</i> | 93  | 234  | 326  |
| LinJ13_V3.0790 | <i>L. infantum</i> | 46  | 26   | 71   |
| LinJ13_V3.0790 | <i>L. infantum</i> | 150 | 86   | 235  |
| LinJ13_V3.0790 | <i>L. infantum</i> | 143 | 307  | 449  |
| LinJ13_V3.0790 | <i>L. infantum</i> | 127 | 490  | 616  |
| LinJ13_V3.0800 | <i>L. infantum</i> | 50  | 49   | 98   |
| LinJ13_V3.0800 | <i>L. infantum</i> | 254 | 178  | 431  |
| LinJ13_V3.0800 | <i>L. infantum</i> | 69  | 442  | 510  |
| LinJ13_V3.0800 | <i>L. infantum</i> | 40  | 691  | 730  |
| LinJ13_V3.0800 | <i>L. infantum</i> | 75  | 747  | 821  |
| LinJ13_V3.0810 | <i>L. infantum</i> | 166 | 1    | 166  |
| LinJ13_V3.0810 | <i>L. infantum</i> | 44  | 182  | 225  |
| LinJ13_V3.0810 | <i>L. infantum</i> | 40  | 320  | 359  |
| LinJ13_V3.0810 | <i>L. infantum</i> | 97  | 420  | 516  |
| LinJ13_V3.0810 | <i>L. infantum</i> | 108 | 542  | 649  |
| LinJ13_V3.0810 | <i>L. infantum</i> | 63  | 801  | 863  |
| LinJ13_V3.0810 | <i>L. infantum</i> | 63  | 910  | 972  |
| LinJ13_V3.0810 | <i>L. infantum</i> | 100 | 1042 | 1141 |
| LinJ13_V3.0810 | <i>L. infantum</i> | 193 | 1263 | 1455 |
| LinJ13_V3.0810 | <i>L. infantum</i> | 63  | 1460 | 1522 |
| LinJ13_V3.0830 | <i>L. infantum</i> | 40  | 21   | 60   |
| LinJ13_V3.0830 | <i>L. infantum</i> | 132 | 371  | 502  |
| LinJ13_V3.0840 | <i>L. infantum</i> | 73  | 229  | 301  |
| LinJ13_V3.0860 | <i>L. infantum</i> | 134 | 1    | 134  |
| LinJ13_V3.0860 | <i>L. infantum</i> | 47  | 208  | 254  |

|                |                    |     |      |      |
|----------------|--------------------|-----|------|------|
| LinJ13_V3.0860 | <i>L. infantum</i> | 159 | 345  | 503  |
| LinJ13_V3.0870 | <i>L. infantum</i> | 51  | 121  | 171  |
| LinJ13_V3.0870 | <i>L. infantum</i> | 57  | 260  | 316  |
| LinJ13_V3.0870 | <i>L. infantum</i> | 45  | 330  | 374  |
| LinJ13_V3.0870 | <i>L. infantum</i> | 71  | 505  | 575  |
| LinJ13_V3.0870 | <i>L. infantum</i> | 61  | 817  | 877  |
| LinJ13_V3.0870 | <i>L. infantum</i> | 148 | 942  | 1089 |
| LinJ13_V3.0870 | <i>L. infantum</i> | 70  | 1587 | 1656 |
| LinJ13_V3.0880 | <i>L. infantum</i> | 490 | 1    | 490  |
| LinJ13_V3.0890 | <i>L. infantum</i> | 73  | 1    | 73   |
| LinJ13_V3.0890 | <i>L. infantum</i> | 66  | 134  | 199  |
| LinJ13_V3.0890 | <i>L. infantum</i> | 152 | 221  | 372  |
| LinJ13_V3.0900 | <i>L. infantum</i> | 40  | 190  | 229  |
| LinJ13_V3.0910 | <i>L. infantum</i> | 74  | 117  | 190  |
| LinJ13_V3.0910 | <i>L. infantum</i> | 52  | 222  | 273  |
| LinJ13_V3.0910 | <i>L. infantum</i> | 51  | 465  | 515  |
| LinJ13_V3.0910 | <i>L. infantum</i> | 44  | 600  | 643  |
| LinJ13_V3.0910 | <i>L. infantum</i> | 44  | 1052 | 1095 |
| LinJ13_V3.0910 | <i>L. infantum</i> | 142 | 1151 | 1292 |
| LinJ13_V3.0920 | <i>L. infantum</i> | 80  | 1    | 80   |
| LinJ13_V3.0920 | <i>L. infantum</i> | 41  | 191  | 231  |
| LinJ13_V3.0920 | <i>L. infantum</i> | 41  | 191  | 231  |
| LinJ13_V3.0930 | <i>L. infantum</i> | 41  | 218  | 258  |
| LinJ13_V3.0940 | <i>L. infantum</i> | 56  | 558  | 613  |
| LinJ13_V3.0940 | <i>L. infantum</i> | 74  | 683  | 756  |
| LinJ13_V3.0940 | <i>L. infantum</i> | 93  | 789  | 881  |
| LinJ13_V3.0940 | <i>L. infantum</i> | 64  | 1129 | 1192 |
| LinJ13_V3.0970 | <i>L. infantum</i> | 42  | 14   | 55   |
| LinJ13_V3.0970 | <i>L. infantum</i> | 204 | 150  | 353  |
| LinJ13_V3.0970 | <i>L. infantum</i> | 47  | 396  | 442  |
| LinJ13_V3.0970 | <i>L. infantum</i> | 84  | 665  | 748  |
| LinJ13_V3.0970 | <i>L. infantum</i> | 83  | 913  | 995  |
| LinJ13_V3.0970 | <i>L. infantum</i> | 118 | 1142 | 1259 |
| LinJ13_V3.0970 | <i>L. infantum</i> | 83  | 1618 | 1700 |
| LinJ13_V3.0970 | <i>L. infantum</i> | 104 | 1921 | 2024 |
| LinJ13_V3.0970 | <i>L. infantum</i> | 205 | 2037 | 2241 |
| LinJ13_V3.0980 | <i>L. infantum</i> | 105 | 87   | 191  |
| LinJ13_V3.0980 | <i>L. infantum</i> | 95  | 632  | 726  |
| LinJ13_V3.0980 | <i>L. infantum</i> | 117 | 817  | 933  |
| LinJ13_V3.0980 | <i>L. infantum</i> | 60  | 1219 | 1278 |
| LinJ13_V3.0980 | <i>L. infantum</i> | 40  | 1331 | 1370 |
| LinJ13_V3.0990 | <i>L. infantum</i> | 45  | 1    | 45   |
| LinJ13_V3.1000 | <i>L. infantum</i> | 49  | 102  | 150  |
| LinJ13_V3.1010 | <i>L. infantum</i> | 452 | 43   | 494  |
| LinJ13_V3.1030 | <i>L. infantum</i> | 107 | 226  | 332  |
| LinJ13_V3.1060 | <i>L. infantum</i> | 134 | 1    | 134  |
| LinJ13_V3.1070 | <i>L. infantum</i> | 137 | 1    | 137  |



|                |                    |     |      |      |
|----------------|--------------------|-----|------|------|
| LinJ13_V3.1070 | <i>L. infantum</i> | 98  | 180  | 277  |
| LinJ13_V3.1070 | <i>L. infantum</i> | 74  | 393  | 466  |
| LinJ13_V3.1090 | <i>L. infantum</i> | 135 | 1    | 135  |
| LinJ13_V3.1100 | <i>L. infantum</i> | 74  | 1    | 74   |
| LinJ13_V3.1110 | <i>L. infantum</i> | 99  | 235  | 333  |
| LinJ13_V3.1130 | <i>L. infantum</i> | 61  | 161  | 221  |
| LinJ13_V3.1140 | <i>L. infantum</i> | 70  | 167  | 236  |
| LinJ13_V3.1140 | <i>L. infantum</i> | 43  | 306  | 348  |
| LinJ13_V3.1140 | <i>L. infantum</i> | 44  | 500  | 543  |
| LinJ13_V3.1150 | <i>L. infantum</i> | 81  | 70   | 150  |
| LinJ13_V3.1160 | <i>L. infantum</i> | 65  | 128  | 192  |
| LinJ13_V3.1170 | <i>L. infantum</i> | 86  | 62   | 147  |
| LinJ13_V3.1170 | <i>L. infantum</i> | 55  | 260  | 314  |
| LinJ13_V3.1170 | <i>L. infantum</i> | 115 | 489  | 603  |
| LinJ13_V3.1170 | <i>L. infantum</i> | 64  | 663  | 726  |
| LinJ13_V3.1170 | <i>L. infantum</i> | 89  | 760  | 848  |
| LinJ13_V3.1190 | <i>L. infantum</i> | 443 | 1    | 443  |
| LinJ13_V3.1190 | <i>L. infantum</i> | 83  | 709  | 791  |
| LinJ13_V3.1210 | <i>L. infantum</i> | 109 | 312  | 420  |
| LinJ13_V3.1220 | <i>L. infantum</i> | 59  | 310  | 368  |
| LinJ13_V3.1220 | <i>L. infantum</i> | 81  | 385  | 465  |
| LinJ13_V3.1230 | <i>L. infantum</i> | 48  | 93   | 140  |
| LinJ13_V3.1230 | <i>L. infantum</i> | 65  | 363  | 427  |
| LinJ13_V3.1240 | <i>L. infantum</i> | 161 | 1    | 161  |
| LinJ13_V3.1240 | <i>L. infantum</i> | 47  | 199  | 245  |
| LinJ13_V3.1240 | <i>L. infantum</i> | 42  | 335  | 376  |
| LinJ13_V3.1240 | <i>L. infantum</i> | 155 | 433  | 587  |
| LinJ13_V3.1240 | <i>L. infantum</i> | 135 | 633  | 767  |
| LinJ13_V3.1240 | <i>L. infantum</i> | 111 | 793  | 903  |
| LinJ13_V3.1240 | <i>L. infantum</i> | 161 | 919  | 1079 |
| LinJ13_V3.1240 | <i>L. infantum</i> | 52  | 1087 | 1138 |
| LinJ13_V3.1240 | <i>L. infantum</i> | 253 | 1140 | 1392 |
| LinJ13_V3.1250 | <i>L. infantum</i> | 84  | 44   | 127  |
| LinJ13_V3.1250 | <i>L. infantum</i> | 101 | 193  | 293  |
| LinJ13_V3.1250 | <i>L. infantum</i> | 115 | 564  | 678  |
| LinJ13_V3.1250 | <i>L. infantum</i> | 62  | 726  | 787  |
| LinJ13_V3.1250 | <i>L. infantum</i> | 70  | 819  | 888  |
| LinJ13_V3.1250 | <i>L. infantum</i> | 47  | 966  | 1012 |
| LinJ13_V3.1250 | <i>L. infantum</i> | 74  | 1023 | 1096 |
| LinJ13_V3.1260 | <i>L. infantum</i> | 143 | 382  | 524  |
| LinJ13_V3.1260 | <i>L. infantum</i> | 68  | 616  | 683  |
| LinJ13_V3.1260 | <i>L. infantum</i> | 68  | 616  | 683  |
| LinJ13_V3.1270 | <i>L. infantum</i> | 54  | 58   | 111  |
| LinJ13_V3.1270 | <i>L. infantum</i> | 117 | 159  | 275  |
| LinJ13_V3.1270 | <i>L. infantum</i> | 66  | 472  | 537  |
| LinJ13_V3.1300 | <i>L. infantum</i> | 40  | 276  | 315  |
| LinJ13_V3.1300 | <i>L. infantum</i> | 49  | 540  | 588  |

|                |                    |     |      |      |
|----------------|--------------------|-----|------|------|
| LinJ13_V3.1300 | <i>L. infantum</i> | 49  | 540  | 588  |
| LinJ13_V3.1310 | <i>L. infantum</i> | 262 | 1    | 262  |
| LinJ13_V3.1310 | <i>L. infantum</i> | 269 | 280  | 548  |
| LinJ13_V3.1310 | <i>L. infantum</i> | 254 | 609  | 862  |
| LinJ13_V3.1310 | <i>L. infantum</i> | 136 | 864  | 999  |
| LinJ13_V3.1330 | <i>L. infantum</i> | 621 | 1    | 621  |
| LinJ13_V3.1340 | <i>L. infantum</i> | 85  | 96   | 180  |
| LinJ13_V3.1340 | <i>L. infantum</i> | 99  | 206  | 304  |
| LinJ13_V3.1340 | <i>L. infantum</i> | 163 | 332  | 494  |
| LinJ13_V3.1340 | <i>L. infantum</i> | 65  | 517  | 581  |
| LinJ13_V3.1340 | <i>L. infantum</i> | 344 | 618  | 961  |
| LinJ13_V3.1340 | <i>L. infantum</i> | 48  | 997  | 1044 |
| LinJ13_V3.1340 | <i>L. infantum</i> | 55  | 1065 | 1119 |
| LinJ13_V3.1350 | <i>L. infantum</i> | 143 | 63   | 205  |
| LinJ13_V3.1350 | <i>L. infantum</i> | 159 | 512  | 670  |
| LinJ13_V3.1370 | <i>L. infantum</i> | 40  | 984  | 1023 |
| LinJ13_V3.1390 | <i>L. infantum</i> | 46  | 1    | 46   |
| LinJ13_V3.1390 | <i>L. infantum</i> | 55  | 980  | 1034 |
| LinJ13_V3.1390 | <i>L. infantum</i> | 85  | 1179 | 1263 |
| LinJ13_V3.1390 | <i>L. infantum</i> | 90  | 3145 | 3234 |
| LinJ13_V3.1390 | <i>L. infantum</i> | 62  | 3359 | 3420 |
| LinJ13_V3.1390 | <i>L. infantum</i> | 76  | 4076 | 4151 |
| LinJ13_V3.1390 | <i>L. infantum</i> | 60  | 4381 | 4440 |
| LinJ13_V3.1410 | <i>L. infantum</i> | 49  | 30   | 78   |
| LinJ13_V3.1450 | <i>L. infantum</i> | 82  | 1    | 82   |
| LinJ13_V3.1450 | <i>L. infantum</i> | 43  | 244  | 286  |
| LinJ13_V3.1450 | <i>L. infantum</i> | 43  | 244  | 286  |
| LinJ13_V3.1470 | <i>L. infantum</i> | 78  | 32   | 109  |
| LinJ13_V3.1470 | <i>L. infantum</i> | 174 | 291  | 464  |
| LinJ13_V3.1470 | <i>L. infantum</i> | 132 | 494  | 625  |
| LinJ13_V3.1480 | <i>L. infantum</i> | 289 | 1    | 289  |
| LinJ13_V3.1480 | <i>L. infantum</i> | 120 | 697  | 816  |
| LinJ13_V3.1480 | <i>L. infantum</i> | 82  | 932  | 1013 |
| LinJ13_V3.1480 | <i>L. infantum</i> | 54  | 1112 | 1165 |
| LinJ13_V3.1500 | <i>L. infantum</i> | 68  | 1    | 68   |
| LinJ13_V3.1510 | <i>L. infantum</i> | 111 | 1    | 111  |
| LinJ13_V3.1520 | <i>L. infantum</i> | 62  | 1    | 62   |
| LinJ13_V3.1520 | <i>L. infantum</i> | 66  | 258  | 323  |
| LinJ13_V3.1520 | <i>L. infantum</i> | 49  | 747  | 795  |
| LinJ13_V3.1520 | <i>L. infantum</i> | 40  | 1051 | 1090 |
| LinJ13_V3.1520 | <i>L. infantum</i> | 93  | 1195 | 1287 |
| LinJ13_V3.1520 | <i>L. infantum</i> | 75  | 1403 | 1477 |
| LinJ13_V3.1520 | <i>L. infantum</i> | 45  | 1526 | 1570 |
| LinJ13_V3.1520 | <i>L. infantum</i> | 56  | 1672 | 1727 |
| LinJ13_V3.1520 | <i>L. infantum</i> | 48  | 1926 | 1973 |
| LinJ13_V3.1520 | <i>L. infantum</i> | 63  | 2070 | 2132 |
| LinJ13_V3.1520 | <i>L. infantum</i> | 50  | 2168 | 2217 |

|                |                    |     |      |      |
|----------------|--------------------|-----|------|------|
| LinJ13_V3.1520 | <i>L. infantum</i> | 121 | 2387 | 2507 |
| LinJ13_V3.1520 | <i>L. infantum</i> | 40  | 2816 | 2855 |
| LinJ13_V3.1520 | <i>L. infantum</i> | 41  | 2905 | 2945 |
| LinJ13_V3.1520 | <i>L. infantum</i> | 123 | 3100 | 3222 |
| LinJ13_V3.1520 | <i>L. infantum</i> | 51  | 3232 | 3282 |
| LinJ13_V3.1520 | <i>L. infantum</i> | 196 | 4103 | 4298 |
| LinJ13_V3.1520 | <i>L. infantum</i> | 46  | 4639 | 4684 |
| LinJ13_V3.1520 | <i>L. infantum</i> | 45  | 4745 | 4789 |
| LinJ13_V3.1540 | <i>L. infantum</i> | 47  | 383  | 429  |
| LinJ13_V3.1540 | <i>L. infantum</i> | 199 | 574  | 772  |
| LinJ13_V3.1550 | <i>L. infantum</i> | 657 | 1    | 657  |
| LinJ13_V3.1550 | <i>L. infantum</i> | 209 | 666  | 874  |
| LinJ13_V3.1560 | <i>L. infantum</i> | 77  | 13   | 89   |
| LinJ13_V3.1560 | <i>L. infantum</i> | 67  | 134  | 200  |
| LinJ13_V3.1560 | <i>L. infantum</i> | 67  | 134  | 200  |
| LinJ13_V3.1570 | <i>L. infantum</i> | 68  | 1    | 68   |
| LinJ13_V3.1580 | <i>L. infantum</i> | 63  | 162  | 224  |
| LinJ13_V3.1580 | <i>L. infantum</i> | 52  | 285  | 336  |
| LinJ13_V3.1580 | <i>L. infantum</i> | 105 | 356  | 460  |
| LinJ13_V3.1580 | <i>L. infantum</i> | 86  | 494  | 579  |
| LinJ13_V3.1600 | <i>L. infantum</i> | 104 | 48   | 151  |
| LinJ13_V3.1600 | <i>L. infantum</i> | 64  | 337  | 400  |
| LinJ13_V3.1600 | <i>L. infantum</i> | 64  | 337  | 400  |
| LinJ13_V3.1610 | <i>L. infantum</i> | 406 | 765  | 1170 |
| LinJ13_V3.1630 | <i>L. infantum</i> | 159 | 80   | 238  |
| LinJ14_V3.0020 | <i>L. infantum</i> | 53  | 1    | 53   |
| LinJ14_V3.0020 | <i>L. infantum</i> | 42  | 166  | 207  |
| LinJ14_V3.0020 | <i>L. infantum</i> | 42  | 166  | 207  |
| LinJ14_V3.0030 | <i>L. infantum</i> | 49  | 28   | 76   |
| LinJ14_V3.0030 | <i>L. infantum</i> | 141 | 130  | 270  |
| LinJ14_V3.0040 | <i>L. infantum</i> | 89  | 89   | 177  |
| LinJ14_V3.0050 | <i>L. infantum</i> | 44  | 509  | 552  |
| LinJ14_V3.0050 | <i>L. infantum</i> | 146 | 587  | 732  |
| LinJ14_V3.0090 | <i>L. infantum</i> | 260 | 89   | 348  |
| LinJ14_V3.0100 | <i>L. infantum</i> | 56  | 1    | 56   |
| LinJ14_V3.0100 | <i>L. infantum</i> | 51  | 318  | 368  |
| LinJ14_V3.0100 | <i>L. infantum</i> | 43  | 399  | 441  |
| LinJ14_V3.0100 | <i>L. infantum</i> | 46  | 558  | 603  |
| LinJ14_V3.0110 | <i>L. infantum</i> | 65  | 379  | 443  |
| LinJ14_V3.0110 | <i>L. infantum</i> | 57  | 467  | 523  |
| LinJ14_V3.0120 | <i>L. infantum</i> | 148 | 1    | 148  |
| LinJ14_V3.0120 | <i>L. infantum</i> | 114 | 214  | 327  |
| LinJ14_V3.0140 | <i>L. infantum</i> | 85  | 57   | 141  |
| LinJ14_V3.0140 | <i>L. infantum</i> | 56  | 184  | 239  |
| LinJ14_V3.0150 | <i>L. infantum</i> | 48  | 76   | 123  |
| LinJ14_V3.0160 | <i>L. infantum</i> | 83  | 58   | 140  |
| LinJ14_V3.0170 | <i>L. infantum</i> | 125 | 188  | 312  |

|                |                    |     |      |      |
|----------------|--------------------|-----|------|------|
| LinJ14_V3.0170 | <i>L. infantum</i> | 56  | 630  | 685  |
| LinJ14_V3.0190 | <i>L. infantum</i> | 43  | 157  | 199  |
| LinJ14_V3.0200 | <i>L. infantum</i> | 96  | 78   | 173  |
| LinJ14_V3.0210 | <i>L. infantum</i> | 43  | 1    | 43   |
| LinJ14_V3.0210 | <i>L. infantum</i> | 69  | 149  | 217  |
| LinJ14_V3.0210 | <i>L. infantum</i> | 59  | 232  | 290  |
| LinJ14_V3.0210 | <i>L. infantum</i> | 53  | 338  | 390  |
| LinJ14_V3.0220 | <i>L. infantum</i> | 72  | 157  | 228  |
| LinJ14_V3.0230 | <i>L. infantum</i> | 112 | 151  | 262  |
| LinJ14_V3.0230 | <i>L. infantum</i> | 48  | 325  | 372  |
| LinJ14_V3.0230 | <i>L. infantum</i> | 70  | 448  | 517  |
| LinJ14_V3.0230 | <i>L. infantum</i> | 47  | 557  | 603  |
| LinJ14_V3.0230 | <i>L. infantum</i> | 44  | 643  | 686  |
| LinJ14_V3.0230 | <i>L. infantum</i> | 83  | 820  | 902  |
| LinJ14_V3.0230 | <i>L. infantum</i> | 71  | 1144 | 1214 |
| LinJ14_V3.0230 | <i>L. infantum</i> | 292 | 1545 | 1836 |
| LinJ14_V3.0260 | <i>L. infantum</i> | 41  | 363  | 403  |
| LinJ14_V3.0260 | <i>L. infantum</i> | 43  | 590  | 632  |
| LinJ14_V3.0260 | <i>L. infantum</i> | 43  | 590  | 632  |
| LinJ14_V3.0270 | <i>L. infantum</i> | 52  | 1    | 52   |
| LinJ14_V3.0280 | <i>L. infantum</i> | 128 | 836  | 963  |
| LinJ14_V3.0290 | <i>L. infantum</i> | 45  | 1    | 45   |
| LinJ14_V3.0300 | <i>L. infantum</i> | 97  | 61   | 157  |
| LinJ14_V3.0310 | <i>L. infantum</i> | 51  | 235  | 285  |
| LinJ14_V3.0320 | <i>L. infantum</i> | 155 | 649  | 803  |
| LinJ14_V3.0330 | <i>L. infantum</i> | 202 | 1    | 202  |
| LinJ14_V3.0340 | <i>L. infantum</i> | 377 | 1    | 377  |
| LinJ14_V3.0340 | <i>L. infantum</i> | 124 | 408  | 531  |
| LinJ14_V3.0340 | <i>L. infantum</i> | 75  | 545  | 619  |
| LinJ14_V3.0340 | <i>L. infantum</i> | 43  | 641  | 683  |
| LinJ14_V3.0340 | <i>L. infantum</i> | 118 | 718  | 835  |
| LinJ14_V3.0340 | <i>L. infantum</i> | 47  | 863  | 909  |
| LinJ14_V3.0340 | <i>L. infantum</i> | 45  | 933  | 977  |
| LinJ14_V3.0350 | <i>L. infantum</i> | 53  | 624  | 676  |
| LinJ14_V3.0360 | <i>L. infantum</i> | 210 | 62   | 271  |
| LinJ14_V3.0360 | <i>L. infantum</i> | 61  | 409  | 469  |
| LinJ14_V3.0360 | <i>L. infantum</i> | 135 | 602  | 736  |
| LinJ14_V3.0360 | <i>L. infantum</i> | 270 | 772  | 1041 |
| LinJ14_V3.0370 | <i>L. infantum</i> | 445 | 1    | 445  |
| LinJ14_V3.0370 | <i>L. infantum</i> | 380 | 459  | 838  |
| LinJ14_V3.0370 | <i>L. infantum</i> | 106 | 844  | 949  |
| LinJ14_V3.0370 | <i>L. infantum</i> | 867 | 970  | 1836 |
| LinJ14_V3.0370 | <i>L. infantum</i> | 168 | 1840 | 2007 |
| LinJ14_V3.0370 | <i>L. infantum</i> | 380 | 2044 | 2423 |
| LinJ14_V3.0370 | <i>L. infantum</i> | 292 | 2428 | 2719 |
| LinJ14_V3.0370 | <i>L. infantum</i> | 64  | 2729 | 2792 |
| LinJ14_V3.0370 | <i>L. infantum</i> | 69  | 2843 | 2911 |

|                |                    |     |      |      |
|----------------|--------------------|-----|------|------|
| LinJ14_V3.0380 | <i>L. infantum</i> | 60  | 43   | 102  |
| LinJ14_V3.0410 | <i>L. infantum</i> | 104 | 54   | 157  |
| LinJ14_V3.0420 | <i>L. infantum</i> | 342 | 1    | 342  |
| LinJ14_V3.0420 | <i>L. infantum</i> | 101 | 566  | 666  |
| LinJ14_V3.0430 | <i>L. infantum</i> | 160 | 170  | 329  |
| LinJ14_V3.0430 | <i>L. infantum</i> | 479 | 342  | 820  |
| LinJ14_V3.0450 | <i>L. infantum</i> | 44  | 250  | 293  |
| LinJ14_V3.0460 | <i>L. infantum</i> | 115 | 40   | 154  |
| LinJ14_V3.0460 | <i>L. infantum</i> | 64  | 259  | 322  |
| LinJ14_V3.0470 | <i>L. infantum</i> | 59  | 1    | 59   |
| LinJ14_V3.0510 | <i>L. infantum</i> | 150 | 1    | 150  |
| LinJ14_V3.0510 | <i>L. infantum</i> | 195 | 160  | 354  |
| LinJ14_V3.0510 | <i>L. infantum</i> | 96  | 402  | 497  |
| LinJ14_V3.0530 | <i>L. infantum</i> | 70  | 1    | 70   |
| LinJ14_V3.0540 | <i>L. infantum</i> | 165 | 340  | 504  |
| LinJ14_V3.0560 | <i>L. infantum</i> | 41  | 324  | 364  |
| LinJ14_V3.0570 | <i>L. infantum</i> | 176 | 313  | 488  |
| LinJ14_V3.0580 | <i>L. infantum</i> | 48  | 28   | 75   |
| LinJ14_V3.0580 | <i>L. infantum</i> | 83  | 411  | 493  |
| LinJ14_V3.0580 | <i>L. infantum</i> | 45  | 722  | 766  |
| LinJ14_V3.0580 | <i>L. infantum</i> | 57  | 934  | 990  |
| LinJ14_V3.0580 | <i>L. infantum</i> | 44  | 1082 | 1125 |
| LinJ14_V3.0600 | <i>L. infantum</i> | 58  | 329  | 386  |
| LinJ14_V3.0600 | <i>L. infantum</i> | 43  | 436  | 478  |
| LinJ14_V3.0600 | <i>L. infantum</i> | 118 | 679  | 796  |
| LinJ14_V3.0600 | <i>L. infantum</i> | 89  | 888  | 976  |
| LinJ14_V3.0600 | <i>L. infantum</i> | 178 | 1043 | 1220 |
| LinJ14_V3.0600 | <i>L. infantum</i> | 122 | 1262 | 1383 |
| LinJ14_V3.0610 | <i>L. infantum</i> | 75  | 1    | 75   |
| LinJ14_V3.0610 | <i>L. infantum</i> | 61  | 128  | 188  |
| LinJ14_V3.0620 | <i>L. infantum</i> | 163 | 1    | 163  |
| LinJ14_V3.0620 | <i>L. infantum</i> | 45  | 179  | 223  |
| LinJ14_V3.0620 | <i>L. infantum</i> | 47  | 277  | 323  |
| LinJ14_V3.0620 | <i>L. infantum</i> | 109 | 355  | 463  |
| LinJ14_V3.0630 | <i>L. infantum</i> | 48  | 13   | 60   |
| LinJ14_V3.0630 | <i>L. infantum</i> | 161 | 146  | 306  |
| LinJ14_V3.0630 | <i>L. infantum</i> | 240 | 352  | 591  |
| LinJ14_V3.0640 | <i>L. infantum</i> | 156 | 71   | 226  |
| LinJ14_V3.0740 | <i>L. infantum</i> | 62  | 274  | 335  |
| LinJ14_V3.0800 | <i>L. infantum</i> | 40  | 264  | 303  |
| LinJ14_V3.0810 | <i>L. infantum</i> | 72  | 1    | 72   |
| LinJ14_V3.0810 | <i>L. infantum</i> | 159 | 513  | 671  |
| LinJ14_V3.0810 | <i>L. infantum</i> | 89  | 683  | 771  |
| LinJ14_V3.0810 | <i>L. infantum</i> | 79  | 786  | 864  |
| LinJ14_V3.0810 | <i>L. infantum</i> | 51  | 907  | 957  |
| LinJ14_V3.0820 | <i>L. infantum</i> | 80  | 1    | 80   |
| LinJ14_V3.0820 | <i>L. infantum</i> | 111 | 307  | 417  |

|                |                    |      |      |      |
|----------------|--------------------|------|------|------|
| LinJ14_V3.0820 | <i>L. infantum</i> | 111  | 307  | 417  |
| LinJ14_V3.0830 | <i>L. infantum</i> | 42   | 1    | 42   |
| LinJ14_V3.0830 | <i>L. infantum</i> | 111  | 80   | 190  |
| LinJ14_V3.0830 | <i>L. infantum</i> | 152  | 204  | 355  |
| LinJ14_V3.0850 | <i>L. infantum</i> | 74   | 1    | 74   |
| LinJ14_V3.0850 | <i>L. infantum</i> | 44   | 94   | 137  |
| LinJ14_V3.0850 | <i>L. infantum</i> | 201  | 167  | 367  |
| LinJ14_V3.0850 | <i>L. infantum</i> | 64   | 388  | 451  |
| LinJ14_V3.0850 | <i>L. infantum</i> | 84   | 621  | 704  |
| LinJ14_V3.0850 | <i>L. infantum</i> | 84   | 727  | 810  |
| LinJ14_V3.0850 | <i>L. infantum</i> | 56   | 857  | 912  |
| LinJ14_V3.0850 | <i>L. infantum</i> | 101  | 942  | 1042 |
| LinJ14_V3.0850 | <i>L. infantum</i> | 50   | 1052 | 1101 |
| LinJ14_V3.0850 | <i>L. infantum</i> | 151  | 1168 | 1318 |
| LinJ14_V3.0850 | <i>L. infantum</i> | 44   | 1410 | 1453 |
| LinJ14_V3.0850 | <i>L. infantum</i> | 71   | 1505 | 1575 |
| LinJ14_V3.0850 | <i>L. infantum</i> | 209  | 1690 | 1898 |
| LinJ14_V3.0850 | <i>L. infantum</i> | 105  | 1911 | 2015 |
| LinJ14_V3.0850 | <i>L. infantum</i> | 96   | 2078 | 2173 |
| LinJ14_V3.0850 | <i>L. infantum</i> | 107  | 2220 | 2326 |
| LinJ14_V3.0850 | <i>L. infantum</i> | 102  | 2333 | 2434 |
| LinJ14_V3.0850 | <i>L. infantum</i> | 263  | 2473 | 2735 |
| LinJ14_V3.0850 | <i>L. infantum</i> | 154  | 2738 | 2891 |
| LinJ14_V3.0850 | <i>L. infantum</i> | 1099 | 2895 | 3993 |
| LinJ14_V3.0850 | <i>L. infantum</i> | 79   | 4017 | 4095 |
| LinJ14_V3.0850 | <i>L. infantum</i> | 96   | 4136 | 4231 |
| LinJ14_V3.0860 | <i>L. infantum</i> | 429  | 1    | 429  |
| LinJ14_V3.0870 | <i>L. infantum</i> | 48   | 1    | 48   |
| LinJ14_V3.0870 | <i>L. infantum</i> | 87   | 76   | 162  |
| LinJ14_V3.0870 | <i>L. infantum</i> | 59   | 201  | 259  |
| LinJ14_V3.0870 | <i>L. infantum</i> | 221  | 606  | 826  |
| LinJ14_V3.0870 | <i>L. infantum</i> | 379  | 837  | 1215 |
| LinJ14_V3.0870 | <i>L. infantum</i> | 61   | 1247 | 1307 |
| LinJ14_V3.0880 | <i>L. infantum</i> | 432  | 146  | 577  |
| LinJ14_V3.0890 | <i>L. infantum</i> | 125  | 211  | 335  |
| LinJ14_V3.0890 | <i>L. infantum</i> | 98   | 422  | 519  |
| LinJ14_V3.0890 | <i>L. infantum</i> | 40   | 554  | 593  |
| LinJ14_V3.0900 | <i>L. infantum</i> | 229  | 1    | 229  |
| LinJ14_V3.0900 | <i>L. infantum</i> | 228  | 231  | 458  |
| LinJ14_V3.0900 | <i>L. infantum</i> | 117  | 1053 | 1169 |
| LinJ14_V3.0900 | <i>L. infantum</i> | 82   | 1180 | 1261 |
| LinJ14_V3.0910 | <i>L. infantum</i> | 47   | 69   | 115  |
| LinJ14_V3.0920 | <i>L. infantum</i> | 47   | 69   | 115  |
| LinJ14_V3.0940 | <i>L. infantum</i> | 71   | 1    | 71   |
| LinJ14_V3.0940 | <i>L. infantum</i> | 95   | 102  | 196  |
| LinJ14_V3.0940 | <i>L. infantum</i> | 188  | 395  | 582  |
| LinJ14_V3.0940 | <i>L. infantum</i> | 230  | 638  | 867  |

|                |                    |     |      |      |
|----------------|--------------------|-----|------|------|
| LinJ14_V3.0940 | <i>L. infantum</i> | 46  | 923  | 968  |
| LinJ14_V3.0950 | <i>L. infantum</i> | 63  | 160  | 222  |
| LinJ14_V3.0950 | <i>L. infantum</i> | 275 | 271  | 545  |
| LinJ14_V3.0950 | <i>L. infantum</i> | 67  | 591  | 657  |
| LinJ14_V3.0960 | <i>L. infantum</i> | 42  | 1    | 42   |
| LinJ14_V3.0960 | <i>L. infantum</i> | 362 | 60   | 421  |
| LinJ14_V3.0960 | <i>L. infantum</i> | 99  | 430  | 528  |
| LinJ14_V3.0960 | <i>L. infantum</i> | 47  | 754  | 800  |
| LinJ14_V3.0960 | <i>L. infantum</i> | 58  | 913  | 970  |
| LinJ14_V3.0990 | <i>L. infantum</i> | 41  | 164  | 204  |
| LinJ14_V3.0990 | <i>L. infantum</i> | 108 | 366  | 473  |
| LinJ14_V3.0990 | <i>L. infantum</i> | 105 | 622  | 726  |
| LinJ14_V3.1000 | <i>L. infantum</i> | 43  | 1    | 43   |
| LinJ14_V3.1000 | <i>L. infantum</i> | 510 | 80   | 589  |
| LinJ14_V3.1000 | <i>L. infantum</i> | 68  | 630  | 697  |
| LinJ14_V3.1000 | <i>L. infantum</i> | 109 | 770  | 878  |
| LinJ14_V3.1020 | <i>L. infantum</i> | 214 | 1    | 214  |
| LinJ14_V3.1020 | <i>L. infantum</i> | 59  | 396  | 454  |
| LinJ14_V3.1020 | <i>L. infantum</i> | 51  | 713  | 763  |
| LinJ14_V3.1020 | <i>L. infantum</i> | 60  | 815  | 874  |
| LinJ14_V3.1020 | <i>L. infantum</i> | 51  | 936  | 986  |
| LinJ14_V3.1020 | <i>L. infantum</i> | 81  | 1034 | 1114 |
| LinJ14_V3.1040 | <i>L. infantum</i> | 99  | 548  | 646  |
| LinJ14_V3.1050 | <i>L. infantum</i> | 40  | 1    | 40   |
| LinJ14_V3.1060 | <i>L. infantum</i> | 50  | 1    | 50   |
| LinJ14_V3.1070 | <i>L. infantum</i> | 88  | 1    | 88   |
| LinJ14_V3.1070 | <i>L. infantum</i> | 89  | 91   | 179  |
| LinJ14_V3.1070 | <i>L. infantum</i> | 115 | 419  | 533  |
| LinJ14_V3.1070 | <i>L. infantum</i> | 51  | 826  | 876  |
| LinJ14_V3.1080 | <i>L. infantum</i> | 97  | 58   | 154  |
| LinJ14_V3.1080 | <i>L. infantum</i> | 49  | 266  | 314  |
| LinJ14_V3.1130 | <i>L. infantum</i> | 62  | 1574 | 1635 |
| LinJ14_V3.1130 | <i>L. infantum</i> | 50  | 1850 | 1899 |
| LinJ14_V3.1130 | <i>L. infantum</i> | 49  | 2034 | 2082 |
| LinJ14_V3.1130 | <i>L. infantum</i> | 118 | 2628 | 2745 |
| LinJ14_V3.1130 | <i>L. infantum</i> | 46  | 2852 | 2897 |
| LinJ14_V3.1130 | <i>L. infantum</i> | 71  | 3282 | 3352 |
| LinJ14_V3.1130 | <i>L. infantum</i> | 66  | 3826 | 3891 |
| LinJ14_V3.1130 | <i>L. infantum</i> | 80  | 3915 | 3994 |
| LinJ14_V3.1140 | <i>L. infantum</i> | 199 | 31   | 229  |
| LinJ14_V3.1140 | <i>L. infantum</i> | 77  | 239  | 315  |
| LinJ14_V3.1140 | <i>L. infantum</i> | 54  | 375  | 428  |
| LinJ14_V3.1140 | <i>L. infantum</i> | 79  | 487  | 565  |
| LinJ14_V3.1140 | <i>L. infantum</i> | 62  | 799  | 860  |
| LinJ14_V3.1150 | <i>L. infantum</i> | 49  | 148  | 196  |
| LinJ14_V3.1170 | <i>L. infantum</i> | 43  | 129  | 171  |
| LinJ14_V3.1170 | <i>L. infantum</i> | 47  | 355  | 401  |

|                |                    |      |     |      |
|----------------|--------------------|------|-----|------|
| LinJ14_V3.1170 | <i>L. infantum</i> | 47   | 355 | 401  |
| LinJ14_V3.1180 | <i>L. infantum</i> | 232  | 62  | 293  |
| LinJ14_V3.1180 | <i>L. infantum</i> | 2949 | 331 | 3279 |
| LinJ14_V3.1190 | <i>L. infantum</i> | 108  | 1   | 108  |
| LinJ14_V3.1190 | <i>L. infantum</i> | 64   | 280 | 343  |
| LinJ14_V3.1190 | <i>L. infantum</i> | 165  | 428 | 592  |
| LinJ14_V3.1190 | <i>L. infantum</i> | 205  | 636 | 840  |
| LinJ14_V3.1190 | <i>L. infantum</i> | 1982 | 914 | 2895 |
| LinJ14_V3.1200 | <i>L. infantum</i> | 209  | 1   | 209  |
| LinJ14_V3.1200 | <i>L. infantum</i> | 91   | 326 | 416  |
| LinJ14_V3.1200 | <i>L. infantum</i> | 79   | 669 | 747  |
| LinJ14_V3.1200 | <i>L. infantum</i> | 42   | 856 | 897  |
| LinJ14_V3.1210 | <i>L. infantum</i> | 59   | 149 | 207  |
| LinJ14_V3.1210 | <i>L. infantum</i> | 49   | 428 | 476  |
| LinJ14_V3.1220 | <i>L. infantum</i> | 190  | 1   | 190  |
| LinJ14_V3.1220 | <i>L. infantum</i> | 68   | 347 | 414  |
| LinJ14_V3.1230 | <i>L. infantum</i> | 60   | 1   | 60   |
| LinJ14_V3.1230 | <i>L. infantum</i> | 190  | 119 | 308  |
| LinJ14_V3.1250 | <i>L. infantum</i> | 143  | 141 | 283  |
| LinJ14_V3.1250 | <i>L. infantum</i> | 62   | 326 | 387  |
| LinJ14_V3.1260 | <i>L. infantum</i> | 64   | 432 | 495  |
| LinJ14_V3.1260 | <i>L. infantum</i> | 152  | 558 | 709  |
| LinJ14_V3.1280 | <i>L. infantum</i> | 81   | 1   | 81   |
| LinJ14_V3.1290 | <i>L. infantum</i> | 62   | 86  | 147  |
| LinJ14_V3.1300 | <i>L. infantum</i> | 140  | 56  | 195  |
| LinJ14_V3.1300 | <i>L. infantum</i> | 166  | 221 | 386  |
| LinJ14_V3.1300 | <i>L. infantum</i> | 82   | 414 | 495  |
| LinJ14_V3.1300 | <i>L. infantum</i> | 174  | 569 | 742  |
| LinJ14_V3.1300 | <i>L. infantum</i> | 91   | 841 | 931  |
| LinJ14_V3.1310 | <i>L. infantum</i> | 48   | 297 | 344  |
| LinJ14_V3.1310 | <i>L. infantum</i> | 56   | 406 | 461  |
| LinJ14_V3.1310 | <i>L. infantum</i> | 75   | 479 | 553  |
| LinJ14_V3.1320 | <i>L. infantum</i> | 73   | 122 | 194  |
| LinJ14_V3.1320 | <i>L. infantum</i> | 57   | 246 | 302  |
| LinJ14_V3.1350 | <i>L. infantum</i> | 56   | 66  | 121  |
| LinJ14_V3.1360 | <i>L. infantum</i> | 40   | 67  | 106  |
| LinJ14_V3.1360 | <i>L. infantum</i> | 44   | 201 | 244  |
| LinJ14_V3.1360 | <i>L. infantum</i> | 132  | 283 | 414  |
| LinJ14_V3.1360 | <i>L. infantum</i> | 48   | 450 | 497  |
| LinJ14_V3.1370 | <i>L. infantum</i> | 93   | 14  | 106  |
| LinJ14_V3.1370 | <i>L. infantum</i> | 564  | 238 | 801  |
| LinJ14_V3.1380 | <i>L. infantum</i> | 146  | 1   | 146  |
| LinJ14_V3.1380 | <i>L. infantum</i> | 204  | 464 | 667  |
| LinJ14_V3.1380 | <i>L. infantum</i> | 116  | 684 | 799  |
| LinJ14_V3.1390 | <i>L. infantum</i> | 175  | 15  | 189  |
| LinJ14_V3.1390 | <i>L. infantum</i> | 53   | 273 | 325  |
| LinJ14_V3.1390 | <i>L. infantum</i> | 53   | 273 | 325  |



|                |                    |     |      |      |
|----------------|--------------------|-----|------|------|
| LinJ14_V3.1410 | <i>L. infantum</i> | 174 | 401  | 574  |
| LinJ14_V3.1430 | <i>L. infantum</i> | 87  | 1    | 87   |
| LinJ14_V3.1430 | <i>L. infantum</i> | 59  | 110  | 168  |
| LinJ14_V3.1430 | <i>L. infantum</i> | 53  | 322  | 374  |
| LinJ14_V3.1430 | <i>L. infantum</i> | 43  | 533  | 575  |
| LinJ14_V3.1460 | <i>L. infantum</i> | 49  | 216  | 264  |
| LinJ14_V3.1470 | <i>L. infantum</i> | 48  | 270  | 317  |
| LinJ14_V3.1500 | <i>L. infantum</i> | 61  | 1    | 61   |
| LinJ14_V3.1500 | <i>L. infantum</i> | 175 | 99   | 273  |
| LinJ14_V3.1500 | <i>L. infantum</i> | 117 | 312  | 428  |
| LinJ14_V3.1500 | <i>L. infantum</i> | 71  | 882  | 952  |
| LinJ14_V3.1500 | <i>L. infantum</i> | 59  | 1232 | 1290 |
| LinJ14_V3.1510 | <i>L. infantum</i> | 264 | 292  | 555  |
| LinJ14_V3.1520 | <i>L. infantum</i> | 45  | 494  | 538  |
| LinJ14_V3.1530 | <i>L. infantum</i> | 113 | 422  | 534  |
| LinJ14_V3.1530 | <i>L. infantum</i> | 67  | 582  | 648  |
| LinJ14_V3.1530 | <i>L. infantum</i> | 48  | 652  | 699  |
| LinJ14_V3.1530 | <i>L. infantum</i> | 161 | 785  | 945  |
| LinJ14_V3.1530 | <i>L. infantum</i> | 167 | 1041 | 1207 |
| LinJ14_V3.1540 | <i>L. infantum</i> | 100 | 1    | 100  |
| LinJ14_V3.1540 | <i>L. infantum</i> | 483 | 524  | 1006 |
| LinJ14_V3.1550 | <i>L. infantum</i> | 47  | 1    | 47   |
| LinJ14_V3.1570 | <i>L. infantum</i> | 161 | 26   | 186  |
| LinJ14_V3.1570 | <i>L. infantum</i> | 66  | 237  | 302  |
| LinJ14_V3.1570 | <i>L. infantum</i> | 63  | 343  | 405  |
| LinJ14_V3.1570 | <i>L. infantum</i> | 75  | 410  | 484  |
| LinJ14_V3.1580 | <i>L. infantum</i> | 40  | 228  | 267  |
| LinJ14_V3.1590 | <i>L. infantum</i> | 65  | 34   | 98   |
| LinJ14_V3.1590 | <i>L. infantum</i> | 43  | 728  | 770  |
| LinJ14_V3.1590 | <i>L. infantum</i> | 43  | 728  | 770  |
| LinJ15_V3.0010 | <i>L. infantum</i> | 49  | 1    | 49   |
| LinJ15_V3.0050 | <i>L. infantum</i> | 42  | 1    | 42   |
| LinJ15_V3.0050 | <i>L. infantum</i> | 42  | 238  | 279  |
| LinJ15_V3.0050 | <i>L. infantum</i> | 42  | 238  | 279  |
| LinJ15_V3.0060 | <i>L. infantum</i> | 103 | 1    | 103  |
| LinJ15_V3.0060 | <i>L. infantum</i> | 43  | 168  | 210  |
| LinJ15_V3.0060 | <i>L. infantum</i> | 64  | 264  | 327  |
| LinJ15_V3.0060 | <i>L. infantum</i> | 162 | 431  | 592  |
| LinJ15_V3.0070 | <i>L. infantum</i> | 304 | 120  | 423  |
| LinJ15_V3.0080 | <i>L. infantum</i> | 132 | 190  | 321  |
| LinJ15_V3.0090 | <i>L. infantum</i> | 45  | 106  | 150  |
| LinJ15_V3.0090 | <i>L. infantum</i> | 45  | 155  | 199  |
| LinJ15_V3.0090 | <i>L. infantum</i> | 45  | 155  | 199  |
| LinJ15_V3.0110 | <i>L. infantum</i> | 40  | 1    | 40   |
| LinJ15_V3.0110 | <i>L. infantum</i> | 47  | 71   | 117  |
| LinJ15_V3.0110 | <i>L. infantum</i> | 52  | 200  | 251  |
| LinJ15_V3.0110 | <i>L. infantum</i> | 64  | 319  | 382  |

|                |                    |     |      |      |
|----------------|--------------------|-----|------|------|
| LinJ15_V3.0110 | <i>L. infantum</i> | 59  | 655  | 713  |
| LinJ15_V3.0130 | <i>L. infantum</i> | 61  | 244  | 304  |
| LinJ15_V3.0130 | <i>L. infantum</i> | 168 | 483  | 650  |
| LinJ15_V3.0140 | <i>L. infantum</i> | 156 | 60   | 215  |
| LinJ15_V3.0150 | <i>L. infantum</i> | 43  | 35   | 77   |
| LinJ15_V3.0150 | <i>L. infantum</i> | 70  | 113  | 182  |
| LinJ15_V3.0150 | <i>L. infantum</i> | 70  | 113  | 182  |
| LinJ15_V3.0160 | <i>L. infantum</i> | 229 | 1    | 229  |
| LinJ15_V3.0160 | <i>L. infantum</i> | 314 | 241  | 554  |
| LinJ15_V3.0160 | <i>L. infantum</i> | 77  | 587  | 663  |
| LinJ15_V3.0160 | <i>L. infantum</i> | 64  | 665  | 728  |
| LinJ15_V3.0160 | <i>L. infantum</i> | 50  | 758  | 807  |
| LinJ15_V3.0170 | <i>L. infantum</i> | 107 | 1    | 107  |
| LinJ15_V3.0180 | <i>L. infantum</i> | 54  | 1    | 54   |
| LinJ15_V3.0180 | <i>L. infantum</i> | 241 | 63   | 303  |
| LinJ15_V3.0180 | <i>L. infantum</i> | 90  | 656  | 745  |
| LinJ15_V3.0190 | <i>L. infantum</i> | 160 | 27   | 186  |
| LinJ15_V3.0190 | <i>L. infantum</i> | 294 | 192  | 485  |
| LinJ15_V3.0190 | <i>L. infantum</i> | 82  | 504  | 585  |
| LinJ15_V3.0210 | <i>L. infantum</i> | 69  | 70   | 138  |
| LinJ15_V3.0210 | <i>L. infantum</i> | 42  | 187  | 228  |
| LinJ15_V3.0210 | <i>L. infantum</i> | 42  | 187  | 228  |
| LinJ15_V3.0220 | <i>L. infantum</i> | 46  | 177  | 222  |
| LinJ15_V3.0230 | <i>L. infantum</i> | 78  | 212  | 289  |
| LinJ15_V3.0230 | <i>L. infantum</i> | 98  | 363  | 460  |
| LinJ15_V3.0250 | <i>L. infantum</i> | 60  | 156  | 215  |
| LinJ15_V3.0270 | <i>L. infantum</i> | 65  | 1    | 65   |
| LinJ15_V3.0290 | <i>L. infantum</i> | 122 | 57   | 178  |
| LinJ15_V3.0290 | <i>L. infantum</i> | 112 | 257  | 368  |
| LinJ15_V3.0290 | <i>L. infantum</i> | 59  | 410  | 468  |
| LinJ15_V3.0290 | <i>L. infantum</i> | 80  | 504  | 583  |
| LinJ15_V3.0290 | <i>L. infantum</i> | 82  | 665  | 746  |
| LinJ15_V3.0290 | <i>L. infantum</i> | 129 | 782  | 910  |
| LinJ15_V3.0290 | <i>L. infantum</i> | 68  | 932  | 999  |
| LinJ15_V3.0290 | <i>L. infantum</i> | 52  | 1348 | 1399 |
| LinJ15_V3.0290 | <i>L. infantum</i> | 57  | 1551 | 1607 |
| LinJ15_V3.0300 | <i>L. infantum</i> | 176 | 44   | 219  |
| LinJ15_V3.0300 | <i>L. infantum</i> | 54  | 291  | 344  |
| LinJ15_V3.0300 | <i>L. infantum</i> | 93  | 375  | 467  |
| LinJ15_V3.0340 | <i>L. infantum</i> | 50  | 66   | 115  |
| LinJ15_V3.0340 | <i>L. infantum</i> | 219 | 582  | 800  |
| LinJ15_V3.0360 | <i>L. infantum</i> | 93  | 1    | 93   |
| LinJ15_V3.0360 | <i>L. infantum</i> | 213 | 160  | 372  |
| LinJ15_V3.0360 | <i>L. infantum</i> | 61  | 390  | 450  |
| LinJ15_V3.0360 | <i>L. infantum</i> | 163 | 459  | 621  |
| LinJ15_V3.0370 | <i>L. infantum</i> | 47  | 142  | 188  |
| LinJ15_V3.0370 | <i>L. infantum</i> | 63  | 225  | 287  |

|                |                    |     |      |      |
|----------------|--------------------|-----|------|------|
| LinJ15_V3.0370 | <i>L. infantum</i> | 43  | 310  | 352  |
| LinJ15_V3.0370 | <i>L. infantum</i> | 67  | 662  | 728  |
| LinJ15_V3.0380 | <i>L. infantum</i> | 408 | 85   | 492  |
| LinJ15_V3.0380 | <i>L. infantum</i> | 84  | 735  | 818  |
| LinJ15_V3.0380 | <i>L. infantum</i> | 43  | 861  | 903  |
| LinJ15_V3.0380 | <i>L. infantum</i> | 46  | 947  | 992  |
| LinJ15_V3.0390 | <i>L. infantum</i> | 173 | 1    | 173  |
| LinJ15_V3.0390 | <i>L. infantum</i> | 111 | 209  | 319  |
| LinJ15_V3.0390 | <i>L. infantum</i> | 116 | 324  | 439  |
| LinJ15_V3.0400 | <i>L. infantum</i> | 47  | 257  | 303  |
| LinJ15_V3.0410 | <i>L. infantum</i> | 81  | 1    | 81   |
| LinJ15_V3.0410 | <i>L. infantum</i> | 111 | 110  | 220  |
| LinJ15_V3.0410 | <i>L. infantum</i> | 101 | 251  | 351  |
| LinJ15_V3.0410 | <i>L. infantum</i> | 56  | 409  | 464  |
| LinJ15_V3.0420 | <i>L. infantum</i> | 51  | 58   | 108  |
| LinJ15_V3.0430 | <i>L. infantum</i> | 51  | 58   | 108  |
| LinJ15_V3.0450 | <i>L. infantum</i> | 54  | 30   | 83   |
| LinJ15_V3.0450 | <i>L. infantum</i> | 44  | 286  | 329  |
| LinJ15_V3.0450 | <i>L. infantum</i> | 98  | 365  | 462  |
| LinJ15_V3.0460 | <i>L. infantum</i> | 62  | 409  | 470  |
| LinJ15_V3.0470 | <i>L. infantum</i> | 50  | 1    | 50   |
| LinJ15_V3.0480 | <i>L. infantum</i> | 62  | 46   | 107  |
| LinJ15_V3.0480 | <i>L. infantum</i> | 151 | 138  | 288  |
| LinJ15_V3.0500 | <i>L. infantum</i> | 116 | 1    | 116  |
| LinJ15_V3.0500 | <i>L. infantum</i> | 83  | 132  | 214  |
| LinJ15_V3.0500 | <i>L. infantum</i> | 40  | 236  | 275  |
| LinJ15_V3.0500 | <i>L. infantum</i> | 139 | 313  | 451  |
| LinJ15_V3.0500 | <i>L. infantum</i> | 40  | 610  | 649  |
| LinJ15_V3.0500 | <i>L. infantum</i> | 92  | 907  | 998  |
| LinJ15_V3.0500 | <i>L. infantum</i> | 68  | 1107 | 1174 |
| LinJ15_V3.0500 | <i>L. infantum</i> | 131 | 1484 | 1614 |
| LinJ15_V3.0500 | <i>L. infantum</i> | 482 | 1620 | 2101 |
| LinJ15_V3.0500 | <i>L. infantum</i> | 69  | 2142 | 2210 |
| LinJ15_V3.0500 | <i>L. infantum</i> | 129 | 2277 | 2405 |
| LinJ15_V3.0500 | <i>L. infantum</i> | 167 | 2486 | 2652 |
| LinJ15_V3.0510 | <i>L. infantum</i> | 549 | 1    | 549  |
| LinJ15_V3.0510 | <i>L. infantum</i> | 41  | 728  | 768  |
| LinJ15_V3.0520 | <i>L. infantum</i> | 45  | 50   | 94   |
| LinJ15_V3.0520 | <i>L. infantum</i> | 471 | 177  | 647  |
| LinJ15_V3.0520 | <i>L. infantum</i> | 99  | 822  | 920  |
| LinJ15_V3.0520 | <i>L. infantum</i> | 43  | 922  | 964  |
| LinJ15_V3.0540 | <i>L. infantum</i> | 241 | 138  | 378  |
| LinJ15_V3.0550 | <i>L. infantum</i> | 562 | 1    | 562  |
| LinJ15_V3.0550 | <i>L. infantum</i> | 61  | 648  | 708  |
| LinJ15_V3.0550 | <i>L. infantum</i> | 218 | 754  | 971  |
| LinJ15_V3.0550 | <i>L. infantum</i> | 232 | 1033 | 1264 |
| LinJ15_V3.0550 | <i>L. infantum</i> | 54  | 1607 | 1660 |

|                |                    |     |      |      |
|----------------|--------------------|-----|------|------|
| LinJ15_V3.0550 | <i>L. infantum</i> | 46  | 1677 | 1722 |
| LinJ15_V3.0560 | <i>L. infantum</i> | 41  | 1    | 41   |
| LinJ15_V3.0560 | <i>L. infantum</i> | 132 | 63   | 194  |
| LinJ15_V3.0560 | <i>L. infantum</i> | 126 | 288  | 413  |
| LinJ15_V3.0570 | <i>L. infantum</i> | 40  | 1    | 40   |
| LinJ15_V3.0570 | <i>L. infantum</i> | 139 | 58   | 196  |
| LinJ15_V3.0570 | <i>L. infantum</i> | 41  | 337  | 377  |
| LinJ15_V3.0570 | <i>L. infantum</i> | 64  | 388  | 451  |
| LinJ15_V3.0570 | <i>L. infantum</i> | 209 | 616  | 824  |
| LinJ15_V3.0570 | <i>L. infantum</i> | 105 | 853  | 957  |
| LinJ15_V3.0570 | <i>L. infantum</i> | 104 | 989  | 1092 |
| LinJ15_V3.0570 | <i>L. infantum</i> | 88  | 1160 | 1247 |
| LinJ15_V3.0570 | <i>L. infantum</i> | 116 | 1332 | 1447 |
| LinJ15_V3.0570 | <i>L. infantum</i> | 100 | 1597 | 1696 |
| LinJ15_V3.0580 | <i>L. infantum</i> | 104 | 1    | 104  |
| LinJ15_V3.0580 | <i>L. infantum</i> | 216 | 124  | 339  |
| LinJ15_V3.0580 | <i>L. infantum</i> | 78  | 374  | 451  |
| LinJ15_V3.0580 | <i>L. infantum</i> | 69  | 474  | 542  |
| LinJ15_V3.0590 | <i>L. infantum</i> | 67  | 103  | 169  |
| LinJ15_V3.0600 | <i>L. infantum</i> | 40  | 76   | 115  |
| LinJ15_V3.0600 | <i>L. infantum</i> | 47  | 187  | 233  |
| LinJ15_V3.0600 | <i>L. infantum</i> | 47  | 187  | 233  |
| LinJ15_V3.0610 | <i>L. infantum</i> | 121 | 103  | 223  |
| LinJ15_V3.0620 | <i>L. infantum</i> | 648 | 1    | 648  |
| LinJ15_V3.0620 | <i>L. infantum</i> | 201 | 696  | 896  |
| LinJ15_V3.0620 | <i>L. infantum</i> | 421 | 1127 | 1547 |
| LinJ15_V3.0620 | <i>L. infantum</i> | 170 | 1598 | 1767 |
| LinJ15_V3.0630 | <i>L. infantum</i> | 107 | 17   | 123  |
| LinJ15_V3.0630 | <i>L. infantum</i> | 42  | 149  | 190  |
| LinJ15_V3.0630 | <i>L. infantum</i> | 334 | 223  | 556  |
| LinJ15_V3.0630 | <i>L. infantum</i> | 330 | 728  | 1057 |
| LinJ15_V3.0630 | <i>L. infantum</i> | 93  | 1093 | 1185 |
| LinJ15_V3.0650 | <i>L. infantum</i> | 43  | 1    | 43   |
| LinJ15_V3.0650 | <i>L. infantum</i> | 105 | 257  | 361  |
| LinJ15_V3.0650 | <i>L. infantum</i> | 105 | 257  | 361  |
| LinJ15_V3.0660 | <i>L. infantum</i> | 223 | 1    | 223  |
| LinJ15_V3.0660 | <i>L. infantum</i> | 276 | 239  | 514  |
| LinJ15_V3.0660 | <i>L. infantum</i> | 222 | 542  | 763  |
| LinJ15_V3.0660 | <i>L. infantum</i> | 171 | 785  | 955  |
| LinJ15_V3.0670 | <i>L. infantum</i> | 160 | 1    | 160  |
| LinJ15_V3.0670 | <i>L. infantum</i> | 110 | 579  | 688  |
| LinJ15_V3.0670 | <i>L. infantum</i> | 75  | 740  | 814  |
| LinJ15_V3.0670 | <i>L. infantum</i> | 76  | 880  | 955  |
| LinJ15_V3.0670 | <i>L. infantum</i> | 175 | 975  | 1149 |
| LinJ15_V3.0680 | <i>L. infantum</i> | 393 | 1    | 393  |
| LinJ15_V3.0680 | <i>L. infantum</i> | 145 | 492  | 636  |
| LinJ15_V3.0680 | <i>L. infantum</i> | 60  | 640  | 699  |

|                |                    |     |      |      |
|----------------|--------------------|-----|------|------|
| LinJ15_V3.0690 | <i>L. infantum</i> | 119 | 1    | 119  |
| LinJ15_V3.0690 | <i>L. infantum</i> | 55  | 123  | 177  |
| LinJ15_V3.0690 | <i>L. infantum</i> | 54  | 216  | 269  |
| LinJ15_V3.0690 | <i>L. infantum</i> | 179 | 284  | 462  |
| LinJ15_V3.0710 | <i>L. infantum</i> | 60  | 1    | 60   |
| LinJ15_V3.0710 | <i>L. infantum</i> | 42  | 160  | 201  |
| LinJ15_V3.0710 | <i>L. infantum</i> | 42  | 160  | 201  |
| LinJ15_V3.0730 | <i>L. infantum</i> | 195 | 43   | 237  |
| LinJ15_V3.0730 | <i>L. infantum</i> | 201 | 270  | 470  |
| LinJ15_V3.0730 | <i>L. infantum</i> | 95  | 499  | 593  |
| LinJ15_V3.0730 | <i>L. infantum</i> | 40  | 619  | 658  |
| LinJ15_V3.0730 | <i>L. infantum</i> | 195 | 696  | 890  |
| LinJ15_V3.0730 | <i>L. infantum</i> | 201 | 923  | 1123 |
| LinJ15_V3.0730 | <i>L. infantum</i> | 95  | 1152 | 1246 |
| LinJ15_V3.0730 | <i>L. infantum</i> | 40  | 1272 | 1311 |
| LinJ15_V3.0730 | <i>L. infantum</i> | 64  | 1349 | 1412 |
| LinJ15_V3.0740 | <i>L. infantum</i> | 88  | 89   | 176  |
| LinJ15_V3.0740 | <i>L. infantum</i> | 66  | 198  | 263  |
| LinJ15_V3.0740 | <i>L. infantum</i> | 99  | 309  | 407  |
| LinJ15_V3.0740 | <i>L. infantum</i> | 102 | 513  | 614  |
| LinJ15_V3.0750 | <i>L. infantum</i> | 85  | 72   | 156  |
| LinJ15_V3.0750 | <i>L. infantum</i> | 56  | 210  | 265  |
| LinJ15_V3.0750 | <i>L. infantum</i> | 53  | 384  | 436  |
| LinJ15_V3.0750 | <i>L. infantum</i> | 41  | 650  | 690  |
| LinJ15_V3.0750 | <i>L. infantum</i> | 63  | 740  | 802  |
| LinJ15_V3.0750 | <i>L. infantum</i> | 50  | 867  | 916  |
| LinJ15_V3.0750 | <i>L. infantum</i> | 67  | 1125 | 1191 |
| LinJ15_V3.0750 | <i>L. infantum</i> | 45  | 1222 | 1266 |
| LinJ15_V3.0750 | <i>L. infantum</i> | 228 | 1924 | 2151 |
| LinJ15_V3.0750 | <i>L. infantum</i> | 68  | 2181 | 2248 |
| LinJ15_V3.0750 | <i>L. infantum</i> | 63  | 2627 | 2689 |
| LinJ15_V3.0760 | <i>L. infantum</i> | 95  | 91   | 185  |
| LinJ15_V3.0760 | <i>L. infantum</i> | 48  | 303  | 350  |
| LinJ15_V3.0770 | <i>L. infantum</i> | 65  | 1    | 65   |
| LinJ15_V3.0770 | <i>L. infantum</i> | 80  | 75   | 154  |
| LinJ15_V3.0770 | <i>L. infantum</i> | 60  | 203  | 262  |
| LinJ15_V3.0790 | <i>L. infantum</i> | 333 | 1    | 333  |
| LinJ15_V3.0790 | <i>L. infantum</i> | 119 | 354  | 472  |
| LinJ15_V3.0790 | <i>L. infantum</i> | 92  | 574  | 665  |
| LinJ15_V3.0810 | <i>L. infantum</i> | 297 | 364  | 660  |
| LinJ15_V3.0820 | <i>L. infantum</i> | 87  | 569  | 655  |
| LinJ15_V3.0830 | <i>L. infantum</i> | 61  | 522  | 582  |
| LinJ15_V3.0830 | <i>L. infantum</i> | 54  | 629  | 682  |
| LinJ15_V3.0830 | <i>L. infantum</i> | 77  | 1321 | 1397 |
| LinJ15_V3.0830 | <i>L. infantum</i> | 40  | 1481 | 1520 |
| LinJ15_V3.0830 | <i>L. infantum</i> | 44  | 1612 | 1655 |
| LinJ15_V3.0830 | <i>L. infantum</i> | 51  | 1751 | 1801 |

|                |                    |     |      |      |
|----------------|--------------------|-----|------|------|
| LinJ15_V3.0830 | <i>L. infantum</i> | 226 | 1874 | 2099 |
| LinJ15_V3.0840 | <i>L. infantum</i> | 289 | 1    | 289  |
| LinJ15_V3.0840 | <i>L. infantum</i> | 128 | 307  | 434  |
| LinJ15_V3.0840 | <i>L. infantum</i> | 139 | 498  | 636  |
| LinJ15_V3.0840 | <i>L. infantum</i> | 198 | 660  | 857  |
| LinJ15_V3.0840 | <i>L. infantum</i> | 339 | 863  | 1201 |
| LinJ15_V3.0840 | <i>L. infantum</i> | 151 | 1219 | 1369 |
| LinJ15_V3.0840 | <i>L. infantum</i> | 303 | 1376 | 1678 |
| LinJ15_V3.0840 | <i>L. infantum</i> | 94  | 1710 | 1803 |
| LinJ15_V3.0840 | <i>L. infantum</i> | 137 | 1858 | 1994 |
| LinJ15_V3.0840 | <i>L. infantum</i> | 68  | 2015 | 2082 |
| LinJ15_V3.0850 | <i>L. infantum</i> | 41  | 254  | 294  |
| LinJ15_V3.0850 | <i>L. infantum</i> | 46  | 342  | 387  |
| LinJ15_V3.0850 | <i>L. infantum</i> | 44  | 449  | 492  |
| LinJ15_V3.0880 | <i>L. infantum</i> | 44  | 1    | 44   |
| LinJ15_V3.0880 | <i>L. infantum</i> | 52  | 80   | 131  |
| LinJ15_V3.0880 | <i>L. infantum</i> | 271 | 143  | 413  |
| LinJ15_V3.0890 | <i>L. infantum</i> | 100 | 1    | 100  |
| LinJ15_V3.0890 | <i>L. infantum</i> | 189 | 167  | 355  |
| LinJ15_V3.0890 | <i>L. infantum</i> | 50  | 358  | 407  |
| LinJ15_V3.0890 | <i>L. infantum</i> | 127 | 434  | 560  |
| LinJ15_V3.0890 | <i>L. infantum</i> | 215 | 589  | 803  |
| LinJ15_V3.0900 | <i>L. infantum</i> | 124 | 1    | 124  |
| LinJ15_V3.0910 | <i>L. infantum</i> | 70  | 12   | 81   |
| LinJ15_V3.0910 | <i>L. infantum</i> | 61  | 110  | 170  |
| LinJ15_V3.0910 | <i>L. infantum</i> | 58  | 220  | 277  |
| LinJ15_V3.0910 | <i>L. infantum</i> | 118 | 449  | 566  |
| LinJ15_V3.0920 | <i>L. infantum</i> | 245 | 62   | 306  |
| LinJ15_V3.0930 | <i>L. infantum</i> | 51  | 1    | 51   |
| LinJ15_V3.0930 | <i>L. infantum</i> | 146 | 247  | 392  |
| LinJ15_V3.0930 | <i>L. infantum</i> | 146 | 247  | 392  |
| LinJ15_V3.0940 | <i>L. infantum</i> | 100 | 190  | 289  |
| LinJ15_V3.0950 | <i>L. infantum</i> | 42  | 1    | 42   |
| LinJ15_V3.0950 | <i>L. infantum</i> | 87  | 655  | 741  |
| LinJ15_V3.0960 | <i>L. infantum</i> | 64  | 59   | 122  |
| LinJ15_V3.0960 | <i>L. infantum</i> | 69  | 210  | 278  |
| LinJ15_V3.0960 | <i>L. infantum</i> | 69  | 210  | 278  |
| LinJ15_V3.0970 | <i>L. infantum</i> | 42  | 1    | 42   |
| LinJ15_V3.0970 | <i>L. infantum</i> | 129 | 54   | 182  |
| LinJ15_V3.0970 | <i>L. infantum</i> | 52  | 222  | 273  |
| LinJ15_V3.0970 | <i>L. infantum</i> | 197 | 311  | 507  |
| LinJ15_V3.0970 | <i>L. infantum</i> | 154 | 541  | 694  |
| LinJ15_V3.0970 | <i>L. infantum</i> | 51  | 725  | 775  |
| LinJ15_V3.0970 | <i>L. infantum</i> | 122 | 859  | 980  |
| LinJ15_V3.0970 | <i>L. infantum</i> | 431 | 1280 | 1710 |
| LinJ15_V3.0970 | <i>L. infantum</i> | 86  | 1818 | 1903 |
| LinJ15_V3.0970 | <i>L. infantum</i> | 106 | 2030 | 2135 |

|                |                    |     |      |      |
|----------------|--------------------|-----|------|------|
| LinJ15_V3.0970 | <i>L. infantum</i> | 135 | 2183 | 2317 |
| LinJ15_V3.0980 | <i>L. infantum</i> | 129 | 1    | 129  |
| LinJ15_V3.0980 | <i>L. infantum</i> | 70  | 541  | 610  |
| LinJ15_V3.1000 | <i>L. infantum</i> | 59  | 117  | 175  |
| LinJ15_V3.1000 | <i>L. infantum</i> | 86  | 189  | 274  |
| LinJ15_V3.1000 | <i>L. infantum</i> | 106 | 304  | 409  |
| LinJ15_V3.1000 | <i>L. infantum</i> | 84  | 418  | 501  |
| LinJ15_V3.1000 | <i>L. infantum</i> | 58  | 565  | 622  |
| LinJ15_V3.1000 | <i>L. infantum</i> | 62  | 649  | 710  |
| LinJ15_V3.1000 | <i>L. infantum</i> | 66  | 782  | 847  |
| LinJ15_V3.1000 | <i>L. infantum</i> | 41  | 889  | 929  |
| LinJ15_V3.1000 | <i>L. infantum</i> | 242 | 964  | 1205 |
| LinJ15_V3.1020 | <i>L. infantum</i> | 61  | 123  | 183  |
| LinJ15_V3.1020 | <i>L. infantum</i> | 91  | 201  | 291  |
| LinJ15_V3.1030 | <i>L. infantum</i> | 44  | 278  | 321  |
| LinJ15_V3.1040 | <i>L. infantum</i> | 46  | 1    | 46   |
| LinJ15_V3.1040 | <i>L. infantum</i> | 69  | 76   | 144  |
| LinJ15_V3.1040 | <i>L. infantum</i> | 145 | 361  | 505  |
| LinJ15_V3.1040 | <i>L. infantum</i> | 255 | 607  | 861  |
| LinJ15_V3.1050 | <i>L. infantum</i> | 40  | 158  | 197  |
| LinJ15_V3.1060 | <i>L. infantum</i> | 72  | 92   | 163  |
| LinJ15_V3.1070 | <i>L. infantum</i> | 46  | 597  | 642  |
| LinJ15_V3.1070 | <i>L. infantum</i> | 74  | 659  | 732  |
| LinJ15_V3.1070 | <i>L. infantum</i> | 74  | 659  | 732  |
| LinJ15_V3.1080 | <i>L. infantum</i> | 51  | 309  | 359  |
| LinJ15_V3.1090 | <i>L. infantum</i> | 135 | 1    | 135  |
| LinJ15_V3.1090 | <i>L. infantum</i> | 264 | 164  | 427  |
| LinJ15_V3.1110 | <i>L. infantum</i> | 55  | 62   | 116  |
| LinJ15_V3.1130 | <i>L. infantum</i> | 55  | 62   | 116  |
| LinJ15_V3.1150 | <i>L. infantum</i> | 60  | 66   | 125  |
| LinJ15_V3.1150 | <i>L. infantum</i> | 56  | 282  | 337  |
| LinJ15_V3.1150 | <i>L. infantum</i> | 66  | 363  | 428  |
| LinJ15_V3.1160 | <i>L. infantum</i> | 102 | 186  | 287  |
| LinJ15_V3.1160 | <i>L. infantum</i> | 47  | 364  | 410  |
| LinJ15_V3.1160 | <i>L. infantum</i> | 79  | 442  | 520  |
| LinJ15_V3.1160 | <i>L. infantum</i> | 58  | 709  | 766  |
| LinJ15_V3.1160 | <i>L. infantum</i> | 40  | 985  | 1024 |
| LinJ15_V3.1160 | <i>L. infantum</i> | 57  | 1080 | 1136 |
| LinJ15_V3.1160 | <i>L. infantum</i> | 93  | 1657 | 1749 |
| LinJ15_V3.1160 | <i>L. infantum</i> | 82  | 1765 | 1846 |
| LinJ15_V3.1160 | <i>L. infantum</i> | 40  | 2151 | 2190 |
| LinJ15_V3.1160 | <i>L. infantum</i> | 105 | 2205 | 2309 |
| LinJ15_V3.1160 | <i>L. infantum</i> | 211 | 2432 | 2642 |
| LinJ15_V3.1160 | <i>L. infantum</i> | 469 | 2664 | 3132 |
| LinJ15_V3.1170 | <i>L. infantum</i> | 131 | 1    | 131  |
| LinJ15_V3.1170 | <i>L. infantum</i> | 173 | 139  | 311  |
| LinJ15_V3.1170 | <i>L. infantum</i> | 46  | 411  | 456  |

|                 |                    |     |      |      |
|-----------------|--------------------|-----|------|------|
| LinJ15_V3.1170  | <i>L. infantum</i> | 106 | 938  | 1043 |
| LinJ15_V3.1180  | <i>L. infantum</i> | 101 | 1    | 101  |
| LinJ15_V3.1180  | <i>L. infantum</i> | 232 | 139  | 370  |
| LinJ15_V3.1180  | <i>L. infantum</i> | 57  | 478  | 534  |
| LinJ15_V3.1180  | <i>L. infantum</i> | 40  | 658  | 697  |
| LinJ15_V3.1180  | <i>L. infantum</i> | 154 | 989  | 1142 |
| LinJ15_V3.1180  | <i>L. infantum</i> | 327 | 1593 | 1919 |
| LinJ15_V3.1180  | <i>L. infantum</i> | 68  | 1931 | 1998 |
| LinJ15_V3.1180  | <i>L. infantum</i> | 254 | 2043 | 2296 |
| LinJ15_V3.1180  | <i>L. infantum</i> | 143 | 2322 | 2464 |
| LinJ15_V3.1180  | <i>L. infantum</i> | 175 | 2484 | 2658 |
| LinJ15_V3.1190  | <i>L. infantum</i> | 54  | 58   | 111  |
| LinJ15_V3.1200  | <i>L. infantum</i> | 54  | 58   | 111  |
| LinJ15_V3.1210  | <i>L. infantum</i> | 60  | 366  | 425  |
| LinJ15_V3.1220  | <i>L. infantum</i> | 41  | 14   | 54   |
| LinJ15_V3.1220  | <i>L. infantum</i> | 70  | 57   | 126  |
| LinJ15_V3.1220  | <i>L. infantum</i> | 43  | 146  | 188  |
| LinJ15_V3.1220  | <i>L. infantum</i> | 44  | 218  | 261  |
| LinJ15_V3.1230  | <i>L. infantum</i> | 56  | 258  | 313  |
| LinJ15_V3.1240  | <i>L. infantum</i> | 56  | 258  | 313  |
| LinJ15_V3.1250  | <i>L. infantum</i> | 56  | 258  | 313  |
| LinJ15_V3.1260  | <i>L. infantum</i> | 56  | 258  | 313  |
| LinJ15_V3.1280  | <i>L. infantum</i> | 71  | 337  | 407  |
| LinJ15_V3.1290  | <i>L. infantum</i> | 63  | 1    | 63   |
| LinJ15_V3.1290  | <i>L. infantum</i> | 90  | 252  | 341  |
| LinJ15_V3.1290  | <i>L. infantum</i> | 107 | 438  | 544  |
| LinJ15_V3.1300b | <i>L. infantum</i> | 89  | 66   | 154  |
| LinJ15_V3.1300b | <i>L. infantum</i> | 97  | 205  | 301  |
| LinJ15_V3.1300b | <i>L. infantum</i> | 431 | 388  | 818  |
| LinJ15_V3.1300b | <i>L. infantum</i> | 212 | 837  | 1048 |
| LinJ15_V3.1300b | <i>L. infantum</i> | 67  | 1069 | 1135 |
| LinJ15_V3.1300b | <i>L. infantum</i> | 62  | 1193 | 1254 |
| LinJ15_V3.1300b | <i>L. infantum</i> | 40  | 1320 | 1359 |
| LinJ15_V3.1300b | <i>L. infantum</i> | 82  | 1373 | 1454 |
| LinJ15_V3.1300b | <i>L. infantum</i> | 97  | 1466 | 1562 |
| LinJ15_V3.1310  | <i>L. infantum</i> | 73  | 1144 | 1216 |
| LinJ15_V3.1320  | <i>L. infantum</i> | 113 | 1    | 113  |
| LinJ15_V3.1320  | <i>L. infantum</i> | 148 | 907  | 1054 |
| LinJ15_V3.1330  | <i>L. infantum</i> | 215 | 1    | 215  |
| LinJ15_V3.1330  | <i>L. infantum</i> | 100 | 253  | 352  |
| LinJ15_V3.1330  | <i>L. infantum</i> | 70  | 415  | 484  |
| LinJ15_V3.1340  | <i>L. infantum</i> | 251 | 62   | 312  |
| LinJ15_V3.1340  | <i>L. infantum</i> | 75  | 349  | 423  |
| LinJ15_V3.1340  | <i>L. infantum</i> | 49  | 558  | 606  |
| LinJ15_V3.1340  | <i>L. infantum</i> | 129 | 717  | 845  |
| LinJ15_V3.1340  | <i>L. infantum</i> | 270 | 1186 | 1455 |
| LinJ15_V3.1350  | <i>L. infantum</i> | 51  | 240  | 290  |



|                |                    |     |      |      |
|----------------|--------------------|-----|------|------|
| LinJ15_V3.1360 | <i>L. infantum</i> | 80  | 159  | 238  |
| LinJ15_V3.1380 | <i>L. infantum</i> | 303 | 1    | 303  |
| LinJ15_V3.1390 | <i>L. infantum</i> | 55  | 1    | 55   |
| LinJ15_V3.1390 | <i>L. infantum</i> | 66  | 107  | 172  |
| LinJ15_V3.1400 | <i>L. infantum</i> | 46  | 152  | 197  |
| LinJ15_V3.1430 | <i>L. infantum</i> | 91  | 355  | 445  |
| LinJ15_V3.1450 | <i>L. infantum</i> | 82  | 214  | 295  |
| LinJ15_V3.1460 | <i>L. infantum</i> | 142 | 337  | 478  |
| LinJ15_V3.1490 | <i>L. infantum</i> | 47  | 1    | 47   |
| LinJ15_V3.1500 | <i>L. infantum</i> | 59  | 166  | 224  |
| LinJ15_V3.1550 | <i>L. infantum</i> | 41  | 54   | 94   |
| LinJ15_V3.1560 | <i>L. infantum</i> | 47  | 1    | 47   |
| LinJ15_V3.1560 | <i>L. infantum</i> | 68  | 114  | 181  |
| LinJ15_V3.1560 | <i>L. infantum</i> | 289 | 378  | 666  |
| LinJ15_V3.1590 | <i>L. infantum</i> | 57  | 53   | 109  |
| LinJ15_V3.1610 | <i>L. infantum</i> | 48  | 369  | 416  |
| LinJ15_V3.1620 | <i>L. infantum</i> | 54  | 1    | 54   |
| LinJ15_V3.1620 | <i>L. infantum</i> | 139 | 84   | 222  |
| LinJ15_V3.1620 | <i>L. infantum</i> | 139 | 84   | 222  |
| LinJ15_V3.1640 | <i>L. infantum</i> | 42  | 152  | 193  |
| LinJ15_V3.1640 | <i>L. infantum</i> | 56  | 870  | 925  |
| LinJ15_V3.1640 | <i>L. infantum</i> | 48  | 1209 | 1256 |
| LinJ15_V3.1650 | <i>L. infantum</i> | 148 | 305  | 452  |
| LinJ15_V3.1650 | <i>L. infantum</i> | 54  | 490  | 543  |
| LinJ16_V30010  | <i>L. infantum</i> | 43  | 143  | 185  |
| LinJ16_V30060  | <i>L. infantum</i> | 61  | 181  | 241  |
| LinJ16_V30060  | <i>L. infantum</i> | 48  | 536  | 583  |
| LinJ16_V30060  | <i>L. infantum</i> | 48  | 536  | 583  |
| LinJ16_V30080  | <i>L. infantum</i> | 56  | 55   | 110  |
| LinJ16_V30090  | <i>L. infantum</i> | 75  | 1    | 75   |
| LinJ16_V30090  | <i>L. infantum</i> | 63  | 384  | 446  |
| LinJ16_V30090  | <i>L. infantum</i> | 82  | 508  | 589  |
| LinJ16_V30090  | <i>L. infantum</i> | 115 | 621  | 735  |
| LinJ16_V30110  | <i>L. infantum</i> | 70  | 168  | 237  |
| LinJ16_V30130  | <i>L. infantum</i> | 50  | 1    | 50   |
| LinJ16_V30130  | <i>L. infantum</i> | 44  | 62   | 105  |
| LinJ16_V30130  | <i>L. infantum</i> | 44  | 422  | 465  |
| LinJ16_V30130  | <i>L. infantum</i> | 46  | 670  | 715  |
| LinJ16_V30140  | <i>L. infantum</i> | 69  | 34   | 102  |
| LinJ16_V30140  | <i>L. infantum</i> | 83  | 104  | 186  |
| LinJ16_V30140  | <i>L. infantum</i> | 83  | 104  | 186  |
| LinJ16_V30150  | <i>L. infantum</i> | 40  | 1    | 40   |
| LinJ16_V30150  | <i>L. infantum</i> | 53  | 116  | 168  |
| LinJ16_V30150  | <i>L. infantum</i> | 53  | 116  | 168  |
| LinJ16_V30160  | <i>L. infantum</i> | 129 | 83   | 211  |
| LinJ16_V30170  | <i>L. infantum</i> | 41  | 1    | 41   |
| LinJ16_V30170  | <i>L. infantum</i> | 58  | 248  | 305  |

|               |                    |     |      |      |
|---------------|--------------------|-----|------|------|
| LinJ16_V30170 | <i>L. infantum</i> | 58  | 248  | 305  |
| LinJ16_V30180 | <i>L. infantum</i> | 87  | 144  | 230  |
| LinJ16_V30180 | <i>L. infantum</i> | 48  | 302  | 349  |
| LinJ16_V30180 | <i>L. infantum</i> | 69  | 1180 | 1248 |
| LinJ16_V30180 | <i>L. infantum</i> | 69  | 1283 | 1351 |
| LinJ16_V30180 | <i>L. infantum</i> | 312 | 1507 | 1818 |
| LinJ16_V30180 | <i>L. infantum</i> | 62  | 1918 | 1979 |
| LinJ16_V30180 | <i>L. infantum</i> | 51  | 2310 | 2360 |
| LinJ16_V30180 | <i>L. infantum</i> | 65  | 2400 | 2464 |
| LinJ16_V30180 | <i>L. infantum</i> | 112 | 2732 | 2843 |
| LinJ16_V30180 | <i>L. infantum</i> | 50  | 2906 | 2955 |
| LinJ16_V30180 | <i>L. infantum</i> | 62  | 3045 | 3106 |
| LinJ16_V30180 | <i>L. infantum</i> | 72  | 3338 | 3409 |
| LinJ16_V30180 | <i>L. infantum</i> | 79  | 3446 | 3524 |
| LinJ16_V30180 | <i>L. infantum</i> | 49  | 3548 | 3596 |
| LinJ16_V30180 | <i>L. infantum</i> | 68  | 4272 | 4339 |
| LinJ16_V30180 | <i>L. infantum</i> | 48  | 4393 | 4440 |
| LinJ16_V30190 | <i>L. infantum</i> | 45  | 1    | 45   |
| LinJ16_V30190 | <i>L. infantum</i> | 96  | 57   | 152  |
| LinJ16_V30200 | <i>L. infantum</i> | 66  | 1    | 66   |
| LinJ16_V30200 | <i>L. infantum</i> | 122 | 232  | 353  |
| LinJ16_V30220 | <i>L. infantum</i> | 55  | 110  | 164  |
| LinJ16_V30220 | <i>L. infantum</i> | 45  | 339  | 383  |
| LinJ16_V30230 | <i>L. infantum</i> | 50  | 82   | 131  |
| LinJ16_V30250 | <i>L. infantum</i> | 56  | 1    | 56   |
| LinJ16_V30250 | <i>L. infantum</i> | 43  | 117  | 159  |
| LinJ16_V30250 | <i>L. infantum</i> | 43  | 657  | 699  |
| LinJ16_V30270 | <i>L. infantum</i> | 64  | 68   | 131  |
| LinJ16_V30280 | <i>L. infantum</i> | 43  | 51   | 93   |
| LinJ16_V30280 | <i>L. infantum</i> | 57  | 153  | 209  |
| LinJ16_V30280 | <i>L. infantum</i> | 42  | 297  | 338  |
| LinJ16_V30280 | <i>L. infantum</i> | 68  | 396  | 463  |
| LinJ16_V30280 | <i>L. infantum</i> | 46  | 942  | 987  |
| LinJ16_V30290 | <i>L. infantum</i> | 45  | 452  | 496  |
| LinJ16_V30290 | <i>L. infantum</i> | 40  | 724  | 763  |
| LinJ16_V30290 | <i>L. infantum</i> | 88  | 783  | 870  |
| LinJ16_V30290 | <i>L. infantum</i> | 50  | 2133 | 2182 |
| LinJ16_V30290 | <i>L. infantum</i> | 94  | 2781 | 2874 |
| LinJ16_V30300 | <i>L. infantum</i> | 47  | 110  | 156  |
| LinJ16_V30310 | <i>L. infantum</i> | 139 | 257  | 395  |
| LinJ16_V30310 | <i>L. infantum</i> | 106 | 427  | 532  |
| LinJ16_V30310 | <i>L. infantum</i> | 106 | 427  | 532  |
| LinJ16_V30320 | <i>L. infantum</i> | 41  | 89   | 129  |
| LinJ16_V30320 | <i>L. infantum</i> | 73  | 179  | 251  |
| LinJ16_V30320 | <i>L. infantum</i> | 40  | 650  | 689  |
| LinJ16_V30330 | <i>L. infantum</i> | 488 | 384  | 871  |
| LinJ16_V30330 | <i>L. infantum</i> | 225 | 897  | 1121 |

|               |                    |     |      |      |
|---------------|--------------------|-----|------|------|
| LinJ16_V30340 | <i>L. infantum</i> | 66  | 1    | 66   |
| LinJ16_V30340 | <i>L. infantum</i> | 47  | 142  | 188  |
| LinJ16_V30340 | <i>L. infantum</i> | 47  | 142  | 188  |
| LinJ16_V30360 | <i>L. infantum</i> | 72  | 1    | 72   |
| LinJ16_V30370 | <i>L. infantum</i> | 70  | 133  | 202  |
| LinJ16_V30370 | <i>L. infantum</i> | 41  | 210  | 250  |
| LinJ16_V30370 | <i>L. infantum</i> | 41  | 360  | 400  |
| LinJ16_V30380 | <i>L. infantum</i> | 115 | 64   | 178  |
| LinJ16_V30390 | <i>L. infantum</i> | 191 | 1    | 191  |
| LinJ16_V30390 | <i>L. infantum</i> | 51  | 197  | 247  |
| LinJ16_V30390 | <i>L. infantum</i> | 61  | 267  | 327  |
| LinJ16_V30390 | <i>L. infantum</i> | 85  | 515  | 599  |
| LinJ16_V30400 | <i>L. infantum</i> | 62  | 41   | 102  |
| LinJ16_V30400 | <i>L. infantum</i> | 65  | 251  | 315  |
| LinJ16_V30400 | <i>L. infantum</i> | 291 | 710  | 1000 |
| LinJ16_V30420 | <i>L. infantum</i> | 40  | 92   | 131  |
| LinJ16_V30420 | <i>L. infantum</i> | 246 | 330  | 575  |
| LinJ16_V30430 | <i>L. infantum</i> | 63  | 1    | 63   |
| LinJ16_V30440 | <i>L. infantum</i> | 185 | 1    | 185  |
| LinJ16_V30450 | <i>L. infantum</i> | 42  | 683  | 724  |
| LinJ16_V30450 | <i>L. infantum</i> | 50  | 743  | 792  |
| LinJ16_V30450 | <i>L. infantum</i> | 50  | 743  | 792  |
| LinJ16_V30490 | <i>L. infantum</i> | 42  | 683  | 724  |
| LinJ16_V30490 | <i>L. infantum</i> | 48  | 745  | 792  |
| LinJ16_V30490 | <i>L. infantum</i> | 48  | 745  | 792  |
| LinJ16_V30520 | <i>L. infantum</i> | 46  | 33   | 78   |
| LinJ16_V30520 | <i>L. infantum</i> | 107 | 144  | 250  |
| LinJ16_V30520 | <i>L. infantum</i> | 92  | 297  | 388  |
| LinJ16_V30520 | <i>L. infantum</i> | 373 | 432  | 804  |
| LinJ16_V30530 | <i>L. infantum</i> | 43  | 286  | 328  |
| LinJ16_V30570 | <i>L. infantum</i> | 84  | 148  | 231  |
| LinJ16_V30570 | <i>L. infantum</i> | 104 | 373  | 476  |
| LinJ16_V30570 | <i>L. infantum</i> | 120 | 492  | 611  |
| LinJ16_V30580 | <i>L. infantum</i> | 60  | 157  | 216  |
| LinJ16_V30600 | <i>L. infantum</i> | 53  | 1    | 53   |
| LinJ16_V30610 | <i>L. infantum</i> | 53  | 1    | 53   |
| LinJ16_V30620 | <i>L. infantum</i> | 221 | 58   | 278  |
| LinJ16_V30620 | <i>L. infantum</i> | 84  | 317  | 400  |
| LinJ16_V30620 | <i>L. infantum</i> | 61  | 432  | 492  |
| LinJ16_V30620 | <i>L. infantum</i> | 106 | 527  | 632  |
| LinJ16_V30620 | <i>L. infantum</i> | 53  | 784  | 836  |
| LinJ16_V30620 | <i>L. infantum</i> | 120 | 861  | 980  |
| LinJ16_V30620 | <i>L. infantum</i> | 53  | 1052 | 1104 |
| LinJ16_V30630 | <i>L. infantum</i> | 73  | 33   | 105  |
| LinJ16_V30630 | <i>L. infantum</i> | 69  | 121  | 189  |
| LinJ16_V30640 | <i>L. infantum</i> | 114 | 163  | 276  |
| LinJ16_V30640 | <i>L. infantum</i> | 77  | 487  | 563  |

|               |                    |     |      |      |
|---------------|--------------------|-----|------|------|
| LinJ16_V30640 | <i>L. infantum</i> | 77  | 487  | 563  |
| LinJ16_V30660 | <i>L. infantum</i> | 163 | 65   | 227  |
| LinJ16_V30660 | <i>L. infantum</i> | 312 | 255  | 566  |
| LinJ16_V30690 | <i>L. infantum</i> | 65  | 487  | 551  |
| LinJ16_V30700 | <i>L. infantum</i> | 68  | 21   | 88   |
| LinJ16_V30700 | <i>L. infantum</i> | 639 | 116  | 754  |
| LinJ16_V30700 | <i>L. infantum</i> | 71  | 779  | 849  |
| LinJ16_V30710 | <i>L. infantum</i> | 103 | 1    | 103  |
| LinJ16_V30710 | <i>L. infantum</i> | 345 | 121  | 465  |
| LinJ16_V30710 | <i>L. infantum</i> | 95  | 501  | 595  |
| LinJ16_V30710 | <i>L. infantum</i> | 353 | 620  | 972  |
| LinJ16_V30720 | <i>L. infantum</i> | 62  | 55   | 116  |
| LinJ16_V30720 | <i>L. infantum</i> | 41  | 168  | 208  |
| LinJ16_V30720 | <i>L. infantum</i> | 43  | 216  | 258  |
| LinJ16_V30730 | <i>L. infantum</i> | 52  | 82   | 133  |
| LinJ16_V30730 | <i>L. infantum</i> | 53  | 191  | 243  |
| LinJ16_V30730 | <i>L. infantum</i> | 44  | 595  | 638  |
| LinJ16_V30730 | <i>L. infantum</i> | 64  | 730  | 793  |
| LinJ16_V30730 | <i>L. infantum</i> | 44  | 864  | 907  |
| LinJ16_V30730 | <i>L. infantum</i> | 73  | 923  | 995  |
| LinJ16_V30730 | <i>L. infantum</i> | 66  | 1028 | 1093 |
| LinJ16_V30730 | <i>L. infantum</i> | 40  | 1166 | 1205 |
| LinJ16_V30730 | <i>L. infantum</i> | 103 | 1244 | 1346 |
| LinJ16_V30730 | <i>L. infantum</i> | 81  | 1505 | 1585 |
| LinJ16_V30730 | <i>L. infantum</i> | 49  | 1719 | 1767 |
| LinJ16_V30740 | <i>L. infantum</i> | 88  | 33   | 120  |
| LinJ16_V30740 | <i>L. infantum</i> | 92  | 153  | 244  |
| LinJ16_V30740 | <i>L. infantum</i> | 64  | 278  | 341  |
| LinJ16_V30740 | <i>L. infantum</i> | 48  | 348  | 395  |
| LinJ16_V30740 | <i>L. infantum</i> | 135 | 468  | 602  |
| LinJ16_V30740 | <i>L. infantum</i> | 64  | 677  | 740  |
| LinJ16_V30750 | <i>L. infantum</i> | 44  | 174  | 217  |
| LinJ16_V30750 | <i>L. infantum</i> | 44  | 361  | 404  |
| LinJ16_V30750 | <i>L. infantum</i> | 141 | 462  | 602  |
| LinJ16_V30770 | <i>L. infantum</i> | 340 | 53   | 392  |
| LinJ16_V30770 | <i>L. infantum</i> | 43  | 541  | 583  |
| LinJ16_V30780 | <i>L. infantum</i> | 40  | 48   | 87   |
| LinJ16_V30780 | <i>L. infantum</i> | 77  | 120  | 196  |
| LinJ16_V30780 | <i>L. infantum</i> | 107 | 477  | 583  |
| LinJ16_V30780 | <i>L. infantum</i> | 67  | 699  | 765  |
| LinJ16_V30780 | <i>L. infantum</i> | 49  | 886  | 934  |
| LinJ16_V30780 | <i>L. infantum</i> | 141 | 1029 | 1169 |
| LinJ16_V30780 | <i>L. infantum</i> | 74  | 1267 | 1340 |
| LinJ16_V30780 | <i>L. infantum</i> | 82  | 1432 | 1513 |
| LinJ16_V30780 | <i>L. infantum</i> | 43  | 1583 | 1625 |
| LinJ16_V30780 | <i>L. infantum</i> | 78  | 1655 | 1732 |
| LinJ16_V30780 | <i>L. infantum</i> | 81  | 1770 | 1850 |

|               |                    |     |      |      |
|---------------|--------------------|-----|------|------|
| LinJ16_V30780 | <i>L. infantum</i> | 69  | 1917 | 1985 |
| LinJ16_V30780 | <i>L. infantum</i> | 78  | 2121 | 2198 |
| LinJ16_V30780 | <i>L. infantum</i> | 60  | 2397 | 2456 |
| LinJ16_V30780 | <i>L. infantum</i> | 66  | 2494 | 2559 |
| LinJ16_V30780 | <i>L. infantum</i> | 45  | 2604 | 2648 |
| LinJ16_V30780 | <i>L. infantum</i> | 50  | 2879 | 2928 |
| LinJ16_V30780 | <i>L. infantum</i> | 112 | 3042 | 3153 |
| LinJ16_V30780 | <i>L. infantum</i> | 59  | 3425 | 3483 |
| LinJ16_V30780 | <i>L. infantum</i> | 57  | 3782 | 3838 |
| LinJ16_V30780 | <i>L. infantum</i> | 48  | 4433 | 4480 |
| LinJ16_V30780 | <i>L. infantum</i> | 91  | 5280 | 5370 |
| LinJ16_V30780 | <i>L. infantum</i> | 178 | 5394 | 5571 |
| LinJ16_V30800 | <i>L. infantum</i> | 43  | 116  | 158  |
| LinJ16_V30800 | <i>L. infantum</i> | 88  | 285  | 372  |
| LinJ16_V30800 | <i>L. infantum</i> | 43  | 589  | 631  |
| LinJ16_V30810 | <i>L. infantum</i> | 40  | 114  | 153  |
| LinJ16_V30810 | <i>L. infantum</i> | 70  | 178  | 247  |
| LinJ16_V30820 | <i>L. infantum</i> | 232 | 176  | 407  |
| LinJ16_V30820 | <i>L. infantum</i> | 51  | 558  | 608  |
| LinJ16_V30820 | <i>L. infantum</i> | 60  | 618  | 677  |
| LinJ16_V30830 | <i>L. infantum</i> | 139 | 1    | 139  |
| LinJ16_V30850 | <i>L. infantum</i> | 52  | 211  | 262  |
| LinJ16_V30850 | <i>L. infantum</i> | 63  | 326  | 388  |
| LinJ16_V30850 | <i>L. infantum</i> | 46  | 429  | 474  |
| LinJ16_V30860 | <i>L. infantum</i> | 72  | 1    | 72   |
| LinJ16_V30860 | <i>L. infantum</i> | 110 | 96   | 205  |
| LinJ16_V30860 | <i>L. infantum</i> | 110 | 96   | 205  |
| LinJ16_V30870 | <i>L. infantum</i> | 201 | 1    | 201  |
| LinJ16_V30870 | <i>L. infantum</i> | 52  | 366  | 417  |
| LinJ16_V30890 | <i>L. infantum</i> | 75  | 95   | 169  |
| LinJ16_V30890 | <i>L. infantum</i> | 54  | 291  | 344  |
| LinJ16_V30890 | <i>L. infantum</i> | 130 | 533  | 662  |
| LinJ16_V30900 | <i>L. infantum</i> | 76  | 44   | 119  |
| LinJ16_V30900 | <i>L. infantum</i> | 150 | 148  | 297  |
| LinJ16_V30910 | <i>L. infantum</i> | 41  | 156  | 196  |
| LinJ16_V30910 | <i>L. infantum</i> | 56  | 227  | 282  |
| LinJ16_V30910 | <i>L. infantum</i> | 41  | 1093 | 1133 |
| LinJ16_V30910 | <i>L. infantum</i> | 57  | 1502 | 1558 |
| LinJ16_V30930 | <i>L. infantum</i> | 46  | 1    | 46   |
| LinJ16_V30940 | <i>L. infantum</i> | 61  | 1    | 61   |
| LinJ16_V30940 | <i>L. infantum</i> | 91  | 130  | 220  |
| LinJ16_V30970 | <i>L. infantum</i> | 79  | 268  | 346  |
| LinJ16_V30980 | <i>L. infantum</i> | 89  | 170  | 258  |
| LinJ16_V30980 | <i>L. infantum</i> | 45  | 293  | 337  |
| LinJ16_V30980 | <i>L. infantum</i> | 63  | 600  | 662  |
| LinJ16_V30990 | <i>L. infantum</i> | 296 | 1    | 296  |
| LinJ16_V30990 | <i>L. infantum</i> | 642 | 306  | 947  |

|               |                    |     |      |      |
|---------------|--------------------|-----|------|------|
| LinJ16_V31000 | <i>L. infantum</i> | 59  | 148  | 206  |
| LinJ16_V31000 | <i>L. infantum</i> | 88  | 296  | 383  |
| LinJ16_V31000 | <i>L. infantum</i> | 88  | 296  | 383  |
| LinJ16_V31020 | <i>L. infantum</i> | 100 | 253  | 352  |
| LinJ16_V31030 | <i>L. infantum</i> | 173 | 61   | 233  |
| LinJ16_V31030 | <i>L. infantum</i> | 80  | 825  | 904  |
| LinJ16_V31040 | <i>L. infantum</i> | 45  | 1    | 45   |
| LinJ16_V31040 | <i>L. infantum</i> | 84  | 84   | 167  |
| LinJ16_V31040 | <i>L. infantum</i> | 72  | 228  | 299  |
| LinJ16_V31040 | <i>L. infantum</i> | 100 | 788  | 887  |
| LinJ16_V31050 | <i>L. infantum</i> | 121 | 40   | 160  |
| LinJ16_V31050 | <i>L. infantum</i> | 100 | 741  | 840  |
| LinJ16_V31060 | <i>L. infantum</i> | 47  | 1    | 47   |
| LinJ16_V31060 | <i>L. infantum</i> | 106 | 83   | 188  |
| LinJ16_V31060 | <i>L. infantum</i> | 100 | 764  | 863  |
| LinJ16_V31070 | <i>L. infantum</i> | 100 | 443  | 542  |
| LinJ16_V31080 | <i>L. infantum</i> | 71  | 77   | 147  |
| LinJ16_V31080 | <i>L. infantum</i> | 100 | 853  | 952  |
| LinJ16_V31080 | <i>L. infantum</i> | 100 | 853  | 952  |
| LinJ16_V31090 | <i>L. infantum</i> | 41  | 58   | 98   |
| LinJ16_V31090 | <i>L. infantum</i> | 61  | 405  | 465  |
| LinJ16_V31090 | <i>L. infantum</i> | 61  | 405  | 465  |
| LinJ16_V31110 | <i>L. infantum</i> | 72  | 153  | 224  |
| LinJ16_V31110 | <i>L. infantum</i> | 48  | 442  | 489  |
| LinJ16_V31110 | <i>L. infantum</i> | 48  | 442  | 489  |
| LinJ16_V31120 | <i>L. infantum</i> | 44  | 1    | 44   |
| LinJ16_V31120 | <i>L. infantum</i> | 467 | 88   | 554  |
| LinJ16_V31120 | <i>L. infantum</i> | 72  | 562  | 633  |
| LinJ16_V31130 | <i>L. infantum</i> | 103 | 1    | 103  |
| LinJ16_V31130 | <i>L. infantum</i> | 50  | 120  | 169  |
| LinJ16_V31130 | <i>L. infantum</i> | 116 | 212  | 327  |
| LinJ16_V31130 | <i>L. infantum</i> | 166 | 343  | 508  |
| LinJ16_V31130 | <i>L. infantum</i> | 537 | 525  | 1061 |
| LinJ16_V31130 | <i>L. infantum</i> | 91  | 1093 | 1183 |
| LinJ16_V31130 | <i>L. infantum</i> | 90  | 1186 | 1275 |
| LinJ16_V31130 | <i>L. infantum</i> | 563 | 1287 | 1849 |
| LinJ16_V31130 | <i>L. infantum</i> | 45  | 1880 | 1924 |
| LinJ16_V31140 | <i>L. infantum</i> | 56  | 65   | 120  |
| LinJ16_V31140 | <i>L. infantum</i> | 399 | 161  | 559  |
| LinJ16_V31150 | <i>L. infantum</i> | 125 | 1    | 125  |
| LinJ16_V31180 | <i>L. infantum</i> | 165 | 215  | 379  |
| LinJ16_V31180 | <i>L. infantum</i> | 106 | 405  | 510  |
| LinJ16_V31180 | <i>L. infantum</i> | 48  | 513  | 560  |
| LinJ16_V31180 | <i>L. infantum</i> | 74  | 562  | 635  |
| LinJ16_V31210 | <i>L. infantum</i> | 92  | 127  | 218  |
| LinJ16_V31210 | <i>L. infantum</i> | 68  | 272  | 339  |
| LinJ16_V31230 | <i>L. infantum</i> | 145 | 139  | 283  |

|               |                    |     |      |      |
|---------------|--------------------|-----|------|------|
| LinJ16_V31240 | <i>L. infantum</i> | 102 | 144  | 245  |
| LinJ16_V31240 | <i>L. infantum</i> | 56  | 427  | 482  |
| LinJ16_V31240 | <i>L. infantum</i> | 80  | 538  | 617  |
| LinJ16_V31240 | <i>L. infantum</i> | 95  | 1050 | 1144 |
| LinJ16_V31240 | <i>L. infantum</i> | 218 | 1223 | 1440 |
| LinJ16_V31250 | <i>L. infantum</i> | 123 | 244  | 366  |
| LinJ16_V31260 | <i>L. infantum</i> | 169 | 53   | 221  |
| LinJ16_V31260 | <i>L. infantum</i> | 52  | 265  | 316  |
| LinJ16_V31260 | <i>L. infantum</i> | 154 | 332  | 485  |
| LinJ16_V31260 | <i>L. infantum</i> | 48  | 872  | 919  |
| LinJ16_V31260 | <i>L. infantum</i> | 72  | 982  | 1053 |
| LinJ16_V31260 | <i>L. infantum</i> | 74  | 1203 | 1276 |
| LinJ16_V31270 | <i>L. infantum</i> | 158 | 1    | 158  |
| LinJ16_V31270 | <i>L. infantum</i> | 300 | 251  | 550  |
| LinJ16_V31270 | <i>L. infantum</i> | 249 | 553  | 801  |
| LinJ16_V31270 | <i>L. infantum</i> | 246 | 902  | 1147 |
| LinJ16_V31270 | <i>L. infantum</i> | 59  | 1303 | 1361 |
| LinJ16_V31270 | <i>L. infantum</i> | 180 | 1386 | 1565 |
| LinJ16_V31270 | <i>L. infantum</i> | 40  | 1674 | 1713 |
| LinJ16_V31270 | <i>L. infantum</i> | 53  | 2059 | 2111 |
| LinJ16_V31280 | <i>L. infantum</i> | 77  | 1    | 77   |
| LinJ16_V31280 | <i>L. infantum</i> | 42  | 442  | 483  |
| LinJ16_V31280 | <i>L. infantum</i> | 43  | 540  | 582  |
| LinJ16_V31280 | <i>L. infantum</i> | 57  | 1320 | 1376 |
| LinJ16_V31280 | <i>L. infantum</i> | 170 | 1645 | 1814 |
| LinJ16_V31290 | <i>L. infantum</i> | 143 | 64   | 206  |
| LinJ16_V31290 | <i>L. infantum</i> | 119 | 238  | 356  |
| LinJ16_V31290 | <i>L. infantum</i> | 272 | 390  | 661  |
| LinJ16_V31290 | <i>L. infantum</i> | 48  | 770  | 817  |
| LinJ16_V31290 | <i>L. infantum</i> | 115 | 915  | 1029 |
| LinJ16_V31290 | <i>L. infantum</i> | 56  | 1134 | 1189 |
| LinJ16_V31290 | <i>L. infantum</i> | 401 | 1221 | 1621 |
| LinJ16_V31290 | <i>L. infantum</i> | 51  | 1859 | 1909 |
| LinJ16_V31290 | <i>L. infantum</i> | 116 | 2015 | 2130 |
| LinJ16_V31310 | <i>L. infantum</i> | 217 | 10   | 226  |
| LinJ16_V31310 | <i>L. infantum</i> | 46  | 239  | 284  |
| LinJ16_V31310 | <i>L. infantum</i> | 40  | 597  | 636  |
| LinJ16_V31310 | <i>L. infantum</i> | 61  | 671  | 731  |
| LinJ16_V31310 | <i>L. infantum</i> | 107 | 755  | 861  |
| LinJ16_V31310 | <i>L. infantum</i> | 52  | 978  | 1029 |
| LinJ16_V31310 | <i>L. infantum</i> | 102 | 1267 | 1368 |
| LinJ16_V31310 | <i>L. infantum</i> | 58  | 1415 | 1472 |
| LinJ16_V31310 | <i>L. infantum</i> | 46  | 1605 | 1650 |
| LinJ16_V31320 | <i>L. infantum</i> | 248 | 1    | 248  |
| LinJ16_V31320 | <i>L. infantum</i> | 194 | 281  | 474  |
| LinJ16_V31320 | <i>L. infantum</i> | 144 | 625  | 768  |
| LinJ16_V31320 | <i>L. infantum</i> | 40  | 937  | 976  |

|               |                    |      |      |      |
|---------------|--------------------|------|------|------|
| LinJ16_V31320 | <i>L. infantum</i> | 584  | 1063 | 1646 |
| LinJ16_V31320 | <i>L. infantum</i> | 59   | 1758 | 1816 |
| LinJ16_V31320 | <i>L. infantum</i> | 162  | 1920 | 2081 |
| LinJ16_V31320 | <i>L. infantum</i> | 75   | 2101 | 2175 |
| LinJ16_V31320 | <i>L. infantum</i> | 40   | 2194 | 2233 |
| LinJ16_V31340 | <i>L. infantum</i> | 145  | 1    | 145  |
| LinJ16_V31340 | <i>L. infantum</i> | 49   | 373  | 421  |
| LinJ16_V31340 | <i>L. infantum</i> | 43   | 676  | 718  |
| LinJ16_V31360 | <i>L. infantum</i> | 186  | 50   | 235  |
| LinJ16_V31360 | <i>L. infantum</i> | 89   | 286  | 374  |
| LinJ16_V31360 | <i>L. infantum</i> | 109  | 504  | 612  |
| LinJ16_V31360 | <i>L. infantum</i> | 43   | 798  | 840  |
| LinJ16_V31360 | <i>L. infantum</i> | 67   | 870  | 936  |
| LinJ16_V31380 | <i>L. infantum</i> | 97   | 1    | 97   |
| LinJ16_V31400 | <i>L. infantum</i> | 715  | 1    | 715  |
| LinJ16_V31400 | <i>L. infantum</i> | 86   | 1144 | 1229 |
| LinJ16_V31400 | <i>L. infantum</i> | 70   | 1334 | 1403 |
| LinJ16_V31420 | <i>L. infantum</i> | 49   | 218  | 266  |
| LinJ16_V31420 | <i>L. infantum</i> | 40   | 884  | 923  |
| LinJ16_V31420 | <i>L. infantum</i> | 54   | 1109 | 1162 |
| LinJ16_V31420 | <i>L. infantum</i> | 167  | 1385 | 1551 |
| LinJ16_V31460 | <i>L. infantum</i> | 131  | 1    | 131  |
| LinJ16_V31460 | <i>L. infantum</i> | 235  | 140  | 374  |
| LinJ16_V31460 | <i>L. infantum</i> | 148  | 511  | 658  |
| LinJ16_V31460 | <i>L. infantum</i> | 180  | 688  | 867  |
| LinJ16_V31470 | <i>L. infantum</i> | 41   | 186  | 226  |
| LinJ16_V31490 | <i>L. infantum</i> | 77   | 64   | 140  |
| LinJ16_V31490 | <i>L. infantum</i> | 154  | 329  | 482  |
| LinJ16_V31500 | <i>L. infantum</i> | 72   | 89   | 160  |
| LinJ16_V31510 | <i>L. infantum</i> | 120  | 259  | 378  |
| LinJ16_V31510 | <i>L. infantum</i> | 44   | 485  | 528  |
| LinJ16_V31510 | <i>L. infantum</i> | 44   | 485  | 528  |
| LinJ16_V31520 | <i>L. infantum</i> | 120  | 104  | 223  |
| LinJ16_V31520 | <i>L. infantum</i> | 44   | 330  | 373  |
| LinJ16_V31520 | <i>L. infantum</i> | 44   | 330  | 373  |
| LinJ16_V31530 | <i>L. infantum</i> | 55   | 16   | 70   |
| LinJ16_V31530 | <i>L. infantum</i> | 59   | 350  | 408  |
| LinJ16_V31530 | <i>L. infantum</i> | 77   | 604  | 680  |
| LinJ16_V31530 | <i>L. infantum</i> | 51   | 748  | 798  |
| LinJ16_V31530 | <i>L. infantum</i> | 150  | 995  | 1144 |
| LinJ16_V31530 | <i>L. infantum</i> | 60   | 1258 | 1317 |
| LinJ16_V31540 | <i>L. infantum</i> | 70   | 44   | 113  |
| LinJ16_V31540 | <i>L. infantum</i> | 132  | 115  | 246  |
| LinJ16_V31550 | <i>L. infantum</i> | 114  | 1    | 114  |
| LinJ16_V31550 | <i>L. infantum</i> | 2098 | 561  | 2658 |
| LinJ16_V31550 | <i>L. infantum</i> | 50   | 2762 | 2811 |
| LinJ16_V31570 | <i>L. infantum</i> | 194  | 455  | 648  |



|                |                    |     |      |      |
|----------------|--------------------|-----|------|------|
| LinJ16_V31570  | <i>L. infantum</i> | 42  | 752  | 793  |
| LinJ16_V31580  | <i>L. infantum</i> | 77  | 1    | 77   |
| LinJ16_V31580  | <i>L. infantum</i> | 93  | 271  | 363  |
| LinJ16_V31580  | <i>L. infantum</i> | 93  | 271  | 363  |
| LinJ16_V31590  | <i>L. infantum</i> | 59  | 268  | 326  |
| LinJ16_V31600  | <i>L. infantum</i> | 40  | 24   | 63   |
| LinJ16_V31600  | <i>L. infantum</i> | 42  | 156  | 197  |
| LinJ16_V31600  | <i>L. infantum</i> | 74  | 340  | 413  |
| LinJ16_V31600  | <i>L. infantum</i> | 41  | 530  | 570  |
| LinJ16_V31620  | <i>L. infantum</i> | 79  | 240  | 318  |
| LinJ16_V31620  | <i>L. infantum</i> | 139 | 698  | 836  |
| LinJ16_V31620  | <i>L. infantum</i> | 154 | 997  | 1150 |
| LinJ16_V31640  | <i>L. infantum</i> | 214 | 1    | 214  |
| LinJ16_V31650  | <i>L. infantum</i> | 449 | 706  | 1154 |
| LinJ16_V31660  | <i>L. infantum</i> | 57  | 285  | 341  |
| LinJ16_V31660  | <i>L. infantum</i> | 78  | 615  | 692  |
| LinJ16_V31660  | <i>L. infantum</i> | 78  | 615  | 692  |
| LinJ16_V31670  | <i>L. infantum</i> | 135 | 142  | 276  |
| LinJ16_V31680  | <i>L. infantum</i> | 45  | 243  | 287  |
| LinJ16_V31680  | <i>L. infantum</i> | 110 | 476  | 585  |
| LinJ16_V31680  | <i>L. infantum</i> | 99  | 648  | 746  |
| LinJ16_V31690  | <i>L. infantum</i> | 78  | 1    | 78   |
| LinJ16_V31690  | <i>L. infantum</i> | 68  | 156  | 223  |
| LinJ16_V31690  | <i>L. infantum</i> | 41  | 326  | 366  |
| LinJ16_V31700  | <i>L. infantum</i> | 42  | 149  | 190  |
| LinJ16_V31700  | <i>L. infantum</i> | 134 | 259  | 392  |
| LinJ16_V31720  | <i>L. infantum</i> | 53  | 200  | 252  |
| LinJ16_V31720  | <i>L. infantum</i> | 45  | 320  | 364  |
| LinJ16_V31720  | <i>L. infantum</i> | 45  | 320  | 364  |
| LinJ16_V31730  | <i>L. infantum</i> | 51  | 71   | 121  |
| LinJ16_V31730  | <i>L. infantum</i> | 88  | 152  | 239  |
| LinJ16_V31730  | <i>L. infantum</i> | 88  | 152  | 239  |
| LinJ16_V31740  | <i>L. infantum</i> | 40  | 292  | 331  |
| LinJ16_V31760  | <i>L. infantum</i> | 63  | 1    | 63   |
| LinJ16_V31760  | <i>L. infantum</i> | 41  | 843  | 883  |
| LinJ16_V31760  | <i>L. infantum</i> | 51  | 1119 | 1169 |
| LinJ16_V31760  | <i>L. infantum</i> | 47  | 1454 | 1500 |
| LinJ16_V31760  | <i>L. infantum</i> | 202 | 1625 | 1826 |
| LinJ16_V31760  | <i>L. infantum</i> | 40  | 2154 | 2193 |
| LinJ16_V31760  | <i>L. infantum</i> | 40  | 2227 | 2266 |
| LinJ16_V31760  | <i>L. infantum</i> | 360 | 2496 | 2855 |
| LinJ17_V3.0010 | <i>L. infantum</i> | 111 | 516  | 626  |
| LinJ17_V3.0010 | <i>L. infantum</i> | 100 | 675  | 774  |
| LinJ17_V3.0010 | <i>L. infantum</i> | 100 | 675  | 774  |
| LinJ17_V3.0040 | <i>L. infantum</i> | 68  | 120  | 187  |
| LinJ17_V3.0060 | <i>L. infantum</i> | 46  | 158  | 203  |
| LinJ17_V3.0070 | <i>L. infantum</i> | 74  | 480  | 553  |

|                |                    |     |      |      |
|----------------|--------------------|-----|------|------|
| LinJ17_V3.0110 | <i>L. infantum</i> | 57  | 429  | 485  |
| LinJ17_V3.0120 | <i>L. infantum</i> | 118 | 1248 | 1365 |
| LinJ17_V3.0130 | <i>L. infantum</i> | 125 | 1198 | 1322 |
| LinJ17_V3.0140 | <i>L. infantum</i> | 57  | 1283 | 1339 |
| LinJ17_V3.0140 | <i>L. infantum</i> | 50  | 1350 | 1399 |
| LinJ17_V3.0140 | <i>L. infantum</i> | 50  | 1350 | 1399 |
| LinJ17_V3.0180 | <i>L. infantum</i> | 74  | 162  | 235  |
| LinJ17_V3.0210 | <i>L. infantum</i> | 56  | 1    | 56   |
| LinJ17_V3.0210 | <i>L. infantum</i> | 43  | 469  | 511  |
| LinJ17_V3.0210 | <i>L. infantum</i> | 92  | 520  | 611  |
| LinJ17_V3.0220 | <i>L. infantum</i> | 134 | 1    | 134  |
| LinJ17_V3.0220 | <i>L. infantum</i> | 368 | 159  | 526  |
| LinJ17_V3.0240 | <i>L. infantum</i> | 51  | 37   | 87   |
| LinJ17_V3.0240 | <i>L. infantum</i> | 184 | 655  | 838  |
| LinJ17_V3.0260 | <i>L. infantum</i> | 54  | 1    | 54   |
| LinJ17_V3.0260 | <i>L. infantum</i> | 55  | 87   | 141  |
| LinJ17_V3.0260 | <i>L. infantum</i> | 55  | 87   | 141  |
| LinJ17_V3.0270 | <i>L. infantum</i> | 40  | 48   | 87   |
| LinJ17_V3.0270 | <i>L. infantum</i> | 59  | 213  | 271  |
| LinJ17_V3.0270 | <i>L. infantum</i> | 85  | 332  | 416  |
| LinJ17_V3.0270 | <i>L. infantum</i> | 126 | 454  | 579  |
| LinJ17_V3.0270 | <i>L. infantum</i> | 304 | 630  | 933  |
| LinJ17_V3.0270 | <i>L. infantum</i> | 53  | 983  | 1035 |
| LinJ17_V3.0280 | <i>L. infantum</i> | 159 | 1    | 159  |
| LinJ17_V3.0290 | <i>L. infantum</i> | 131 | 1    | 131  |
| LinJ17_V3.0290 | <i>L. infantum</i> | 209 | 186  | 394  |
| LinJ17_V3.0290 | <i>L. infantum</i> | 92  | 875  | 966  |
| LinJ17_V3.0290 | <i>L. infantum</i> | 157 | 1016 | 1172 |
| LinJ17_V3.0310 | <i>L. infantum</i> | 178 | 29   | 206  |
| LinJ17_V3.0310 | <i>L. infantum</i> | 546 | 240  | 785  |
| LinJ17_V3.0320 | <i>L. infantum</i> | 51  | 223  | 273  |
| LinJ17_V3.0330 | <i>L. infantum</i> | 75  | 1    | 75   |
| LinJ17_V3.0340 | <i>L. infantum</i> | 282 | 60   | 341  |
| LinJ17_V3.0340 | <i>L. infantum</i> | 41  | 685  | 725  |
| LinJ17_V3.0350 | <i>L. infantum</i> | 41  | 1    | 41   |
| LinJ17_V3.0350 | <i>L. infantum</i> | 60  | 144  | 203  |
| LinJ17_V3.0350 | <i>L. infantum</i> | 60  | 144  | 203  |
| LinJ17_V3.0360 | <i>L. infantum</i> | 145 | 1    | 145  |
| LinJ17_V3.0360 | <i>L. infantum</i> | 61  | 213  | 273  |
| LinJ17_V3.0360 | <i>L. infantum</i> | 975 | 375  | 1349 |
| LinJ17_V3.0370 | <i>L. infantum</i> | 82  | 1    | 82   |
| LinJ17_V3.0370 | <i>L. infantum</i> | 153 | 175  | 327  |
| LinJ17_V3.0380 | <i>L. infantum</i> | 53  | 319  | 371  |
| LinJ17_V3.0380 | <i>L. infantum</i> | 63  | 749  | 811  |
| LinJ17_V3.0380 | <i>L. infantum</i> | 49  | 850  | 898  |
| LinJ17_V3.0380 | <i>L. infantum</i> | 44  | 1084 | 1127 |
| LinJ17_V3.0380 | <i>L. infantum</i> | 48  | 1334 | 1381 |

|                |                    |     |      |      |
|----------------|--------------------|-----|------|------|
| LinJ17_V3.0400 | <i>L. infantum</i> | 230 | 1    | 230  |
| LinJ17_V3.0420 | <i>L. infantum</i> | 91  | 1    | 91   |
| LinJ17_V3.0420 | <i>L. infantum</i> | 51  | 188  | 238  |
| LinJ17_V3.0420 | <i>L. infantum</i> | 166 | 245  | 410  |
| LinJ17_V3.0420 | <i>L. infantum</i> | 140 | 417  | 556  |
| LinJ17_V3.0420 | <i>L. infantum</i> | 72  | 565  | 636  |
| LinJ17_V3.0430 | <i>L. infantum</i> | 45  | 23   | 67   |
| LinJ17_V3.0430 | <i>L. infantum</i> | 147 | 87   | 233  |
| LinJ17_V3.0440 | <i>L. infantum</i> | 56  | 40   | 95   |
| LinJ17_V3.0440 | <i>L. infantum</i> | 42  | 214  | 255  |
| LinJ17_V3.0440 | <i>L. infantum</i> | 82  | 537  | 618  |
| LinJ17_V3.0440 | <i>L. infantum</i> | 105 | 691  | 795  |
| LinJ17_V3.0440 | <i>L. infantum</i> | 52  | 1066 | 1117 |
| LinJ17_V3.0450 | <i>L. infantum</i> | 207 | 39   | 245  |
| LinJ17_V3.0450 | <i>L. infantum</i> | 68  | 307  | 374  |
| LinJ17_V3.0450 | <i>L. infantum</i> | 85  | 481  | 565  |
| LinJ17_V3.0460 | <i>L. infantum</i> | 129 | 136  | 264  |
| LinJ17_V3.0460 | <i>L. infantum</i> | 390 | 380  | 769  |
| LinJ17_V3.0470 | <i>L. infantum</i> | 55  | 229  | 283  |
| LinJ17_V3.0470 | <i>L. infantum</i> | 126 | 358  | 483  |
| LinJ17_V3.0470 | <i>L. infantum</i> | 126 | 358  | 483  |
| LinJ17_V3.0480 | <i>L. infantum</i> | 933 | 1    | 933  |
| LinJ17_V3.0480 | <i>L. infantum</i> | 142 | 985  | 1126 |
| LinJ17_V3.0480 | <i>L. infantum</i> | 58  | 1175 | 1232 |
| LinJ17_V3.0490 | <i>L. infantum</i> | 183 | 40   | 222  |
| LinJ17_V3.0490 | <i>L. infantum</i> | 57  | 274  | 330  |
| LinJ17_V3.0490 | <i>L. infantum</i> | 281 | 385  | 665  |
| LinJ17_V3.0490 | <i>L. infantum</i> | 559 | 687  | 1245 |
| LinJ17_V3.0490 | <i>L. infantum</i> | 194 | 1319 | 1512 |
| LinJ17_V3.0490 | <i>L. infantum</i> | 88  | 1664 | 1751 |
| LinJ17_V3.0490 | <i>L. infantum</i> | 59  | 1805 | 1863 |
| LinJ17_V3.0500 | <i>L. infantum</i> | 58  | 1    | 58   |
| LinJ17_V3.0500 | <i>L. infantum</i> | 162 | 93   | 254  |
| LinJ17_V3.0500 | <i>L. infantum</i> | 72  | 357  | 428  |
| LinJ17_V3.0500 | <i>L. infantum</i> | 71  | 471  | 541  |
| LinJ17_V3.0500 | <i>L. infantum</i> | 64  | 593  | 656  |
| LinJ17_V3.0500 | <i>L. infantum</i> | 228 | 736  | 963  |
| LinJ17_V3.0500 | <i>L. infantum</i> | 70  | 1311 | 1380 |
| LinJ17_V3.0510 | <i>L. infantum</i> | 134 | 1    | 134  |
| LinJ17_V3.0530 | <i>L. infantum</i> | 57  | 136  | 192  |
| LinJ17_V3.0530 | <i>L. infantum</i> | 40  | 241  | 280  |
| LinJ17_V3.0530 | <i>L. infantum</i> | 147 | 307  | 453  |
| LinJ17_V3.0530 | <i>L. infantum</i> | 66  | 484  | 549  |
| LinJ17_V3.0530 | <i>L. infantum</i> | 58  | 690  | 747  |
| LinJ17_V3.0530 | <i>L. infantum</i> | 75  | 830  | 904  |
| LinJ17_V3.0530 | <i>L. infantum</i> | 105 | 1204 | 1308 |
| LinJ17_V3.0530 | <i>L. infantum</i> | 49  | 1496 | 1544 |

|                |                    |     |      |      |
|----------------|--------------------|-----|------|------|
| LinJ17_V3.0530 | <i>L. infantum</i> | 68  | 1973 | 2040 |
| LinJ17_V3.0530 | <i>L. infantum</i> | 52  | 2082 | 2133 |
| LinJ17_V3.0540 | <i>L. infantum</i> | 42  | 45   | 86   |
| LinJ17_V3.0540 | <i>L. infantum</i> | 112 | 119  | 230  |
| LinJ17_V3.0550 | <i>L. infantum</i> | 259 | 1    | 259  |
| LinJ17_V3.0550 | <i>L. infantum</i> | 102 | 332  | 433  |
| LinJ17_V3.0550 | <i>L. infantum</i> | 69  | 450  | 518  |
| LinJ17_V3.0550 | <i>L. infantum</i> | 46  | 530  | 575  |
| LinJ17_V3.0550 | <i>L. infantum</i> | 40  | 746  | 785  |
| LinJ17_V3.0560 | <i>L. infantum</i> | 364 | 1    | 364  |
| LinJ17_V3.0560 | <i>L. infantum</i> | 245 | 400  | 644  |
| LinJ17_V3.0560 | <i>L. infantum</i> | 68  | 680  | 747  |
| LinJ17_V3.0560 | <i>L. infantum</i> | 100 | 815  | 914  |
| LinJ17_V3.0560 | <i>L. infantum</i> | 237 | 922  | 1158 |
| LinJ17_V3.0560 | <i>L. infantum</i> | 82  | 1212 | 1293 |
| LinJ17_V3.0560 | <i>L. infantum</i> | 128 | 1299 | 1426 |
| LinJ17_V3.0570 | <i>L. infantum</i> | 741 | 1    | 741  |
| LinJ17_V3.0570 | <i>L. infantum</i> | 264 | 767  | 1030 |
| LinJ17_V3.0580 | <i>L. infantum</i> | 580 | 1    | 580  |
| LinJ17_V3.0580 | <i>L. infantum</i> | 121 | 588  | 708  |
| LinJ17_V3.0580 | <i>L. infantum</i> | 121 | 726  | 846  |
| LinJ17_V3.0590 | <i>L. infantum</i> | 96  | 1    | 96   |
| LinJ17_V3.0590 | <i>L. infantum</i> | 48  | 114  | 161  |
| LinJ17_V3.0590 | <i>L. infantum</i> | 89  | 169  | 257  |
| LinJ17_V3.0590 | <i>L. infantum</i> | 289 | 304  | 592  |
| LinJ17_V3.0590 | <i>L. infantum</i> | 258 | 614  | 871  |
| LinJ17_V3.0590 | <i>L. infantum</i> | 74  | 902  | 975  |
| LinJ17_V3.0600 | <i>L. infantum</i> | 119 | 1    | 119  |
| LinJ17_V3.0600 | <i>L. infantum</i> | 196 | 133  | 328  |
| LinJ17_V3.0600 | <i>L. infantum</i> | 63  | 444  | 506  |
| LinJ17_V3.0600 | <i>L. infantum</i> | 70  | 595  | 664  |
| LinJ17_V3.0600 | <i>L. infantum</i> | 50  | 709  | 758  |
| LinJ17_V3.0600 | <i>L. infantum</i> | 72  | 915  | 986  |
| LinJ17_V3.0600 | <i>L. infantum</i> | 269 | 1002 | 1270 |
| LinJ17_V3.0610 | <i>L. infantum</i> | 162 | 55   | 216  |
| LinJ17_V3.0620 | <i>L. infantum</i> | 56  | 65   | 120  |
| LinJ17_V3.0630 | <i>L. infantum</i> | 151 | 17   | 167  |
| LinJ17_V3.0630 | <i>L. infantum</i> | 626 | 210  | 835  |
| LinJ17_V3.0630 | <i>L. infantum</i> | 57  | 860  | 916  |
| LinJ17_V3.0630 | <i>L. infantum</i> | 40  | 948  | 987  |
| LinJ17_V3.0630 | <i>L. infantum</i> | 121 | 1025 | 1145 |
| LinJ17_V3.0640 | <i>L. infantum</i> | 63  | 190  | 252  |
| LinJ17_V3.0650 | <i>L. infantum</i> | 70  | 94   | 163  |
| LinJ17_V3.0650 | <i>L. infantum</i> | 47  | 318  | 364  |
| LinJ17_V3.0650 | <i>L. infantum</i> | 56  | 385  | 440  |
| LinJ17_V3.0650 | <i>L. infantum</i> | 91  | 571  | 661  |
| LinJ17_V3.0650 | <i>L. infantum</i> | 175 | 707  | 881  |

|                |                    |     |      |      |
|----------------|--------------------|-----|------|------|
| LinJ17_V3.0650 | <i>L. infantum</i> | 44  | 894  | 937  |
| LinJ17_V3.0650 | <i>L. infantum</i> | 45  | 1003 | 1047 |
| LinJ17_V3.0650 | <i>L. infantum</i> | 415 | 1080 | 1494 |
| LinJ17_V3.0650 | <i>L. infantum</i> | 135 | 1503 | 1637 |
| LinJ17_V3.0660 | <i>L. infantum</i> | 59  | 1    | 59   |
| LinJ17_V3.0670 | <i>L. infantum</i> | 240 | 260  | 499  |
| LinJ17_V3.0710 | <i>L. infantum</i> | 95  | 63   | 157  |
| LinJ17_V3.0710 | <i>L. infantum</i> | 60  | 200  | 259  |
| LinJ17_V3.0710 | <i>L. infantum</i> | 61  | 373  | 433  |
| LinJ17_V3.0720 | <i>L. infantum</i> | 46  | 277  | 322  |
| LinJ17_V3.0730 | <i>L. infantum</i> | 130 | 41   | 170  |
| LinJ17_V3.0730 | <i>L. infantum</i> | 362 | 213  | 574  |
| LinJ17_V3.0740 | <i>L. infantum</i> | 41  | 211  | 251  |
| LinJ17_V3.0750 | <i>L. infantum</i> | 115 | 82   | 196  |
| LinJ17_V3.0750 | <i>L. infantum</i> | 51  | 302  | 352  |
| LinJ17_V3.0760 | <i>L. infantum</i> | 164 | 1    | 164  |
| LinJ17_V3.0770 | <i>L. infantum</i> | 43  | 1    | 43   |
| LinJ17_V3.0770 | <i>L. infantum</i> | 219 | 272  | 490  |
| LinJ17_V3.0790 | <i>L. infantum</i> | 106 | 1    | 106  |
| LinJ17_V3.0790 | <i>L. infantum</i> | 147 | 208  | 354  |
| LinJ17_V3.0790 | <i>L. infantum</i> | 51  | 586  | 636  |
| LinJ17_V3.0790 | <i>L. infantum</i> | 58  | 659  | 716  |
| LinJ17_V3.0790 | <i>L. infantum</i> | 76  | 820  | 895  |
| LinJ17_V3.0790 | <i>L. infantum</i> | 94  | 1042 | 1135 |
| LinJ17_V3.0800 | <i>L. infantum</i> | 218 | 368  | 585  |
| LinJ17_V3.0800 | <i>L. infantum</i> | 66  | 666  | 731  |
| LinJ17_V3.0800 | <i>L. infantum</i> | 132 | 793  | 924  |
| LinJ17_V3.0800 | <i>L. infantum</i> | 49  | 1032 | 1080 |
| LinJ17_V3.0800 | <i>L. infantum</i> | 40  | 1188 | 1227 |
| LinJ17_V3.0810 | <i>L. infantum</i> | 460 | 1    | 460  |
| LinJ17_V3.0810 | <i>L. infantum</i> | 238 | 476  | 713  |
| LinJ17_V3.0810 | <i>L. infantum</i> | 41  | 751  | 791  |
| LinJ17_V3.0810 | <i>L. infantum</i> | 289 | 1034 | 1322 |
| LinJ17_V3.0810 | <i>L. infantum</i> | 51  | 1423 | 1473 |
| LinJ17_V3.0810 | <i>L. infantum</i> | 47  | 1490 | 1536 |
| LinJ17_V3.0810 | <i>L. infantum</i> | 137 | 1608 | 1744 |
| LinJ17_V3.0810 | <i>L. infantum</i> | 49  | 1790 | 1838 |
| LinJ17_V3.0820 | <i>L. infantum</i> | 93  | 352  | 444  |
| LinJ17_V3.0830 | <i>L. infantum</i> | 72  | 97   | 168  |
| LinJ17_V3.0830 | <i>L. infantum</i> | 233 | 183  | 415  |
| LinJ17_V3.0830 | <i>L. infantum</i> | 89  | 417  | 505  |
| LinJ17_V3.0840 | <i>L. infantum</i> | 73  | 404  | 476  |
| LinJ17_V3.0850 | <i>L. infantum</i> | 443 | 112  | 554  |
| LinJ17_V3.0850 | <i>L. infantum</i> | 74  | 574  | 647  |
| LinJ17_V3.0850 | <i>L. infantum</i> | 54  | 755  | 808  |
| LinJ17_V3.0860 | <i>L. infantum</i> | 113 | 1    | 113  |
| LinJ17_V3.0860 | <i>L. infantum</i> | 46  | 265  | 310  |

|                |                    |     |      |      |
|----------------|--------------------|-----|------|------|
| LinJ17_V3.0860 | <i>L. infantum</i> | 158 | 373  | 530  |
| LinJ17_V3.0860 | <i>L. infantum</i> | 56  | 592  | 647  |
| LinJ17_V3.0890 | <i>L. infantum</i> | 68  | 197  | 264  |
| LinJ17_V3.0890 | <i>L. infantum</i> | 142 | 315  | 456  |
| LinJ17_V3.0890 | <i>L. infantum</i> | 76  | 494  | 569  |
| LinJ17_V3.0890 | <i>L. infantum</i> | 348 | 593  | 940  |
| LinJ17_V3.0900 | <i>L. infantum</i> | 104 | 1    | 104  |
| LinJ17_V3.0900 | <i>L. infantum</i> | 98  | 175  | 272  |
| LinJ17_V3.0900 | <i>L. infantum</i> | 74  | 314  | 387  |
| LinJ17_V3.0900 | <i>L. infantum</i> | 51  | 521  | 571  |
| LinJ17_V3.0910 | <i>L. infantum</i> | 183 | 25   | 207  |
| LinJ17_V3.0920 | <i>L. infantum</i> | 152 | 1    | 152  |
| LinJ17_V3.0920 | <i>L. infantum</i> | 58  | 157  | 214  |
| LinJ17_V3.0920 | <i>L. infantum</i> | 113 | 236  | 348  |
| LinJ17_V3.0920 | <i>L. infantum</i> | 180 | 366  | 545  |
| LinJ17_V3.0930 | <i>L. infantum</i> | 45  | 1    | 45   |
| LinJ17_V3.0930 | <i>L. infantum</i> | 185 | 437  | 621  |
| LinJ17_V3.0940 | <i>L. infantum</i> | 118 | 1    | 118  |
| LinJ17_V3.0940 | <i>L. infantum</i> | 58  | 177  | 234  |
| LinJ17_V3.0950 | <i>L. infantum</i> | 77  | 1    | 77   |
| LinJ17_V3.0960 | <i>L. infantum</i> | 120 | 25   | 144  |
| LinJ17_V3.1000 | <i>L. infantum</i> | 51  | 1    | 51   |
| LinJ17_V3.1000 | <i>L. infantum</i> | 153 | 449  | 601  |
| LinJ17_V3.1000 | <i>L. infantum</i> | 40  | 635  | 674  |
| LinJ17_V3.1020 | <i>L. infantum</i> | 49  | 51   | 99   |
| LinJ17_V3.1030 | <i>L. infantum</i> | 42  | 1174 | 1215 |
| LinJ17_V3.1040 | <i>L. infantum</i> | 125 | 1    | 125  |
| LinJ17_V3.1040 | <i>L. infantum</i> | 117 | 224  | 340  |
| LinJ17_V3.1040 | <i>L. infantum</i> | 495 | 372  | 866  |
| LinJ17_V3.1040 | <i>L. infantum</i> | 261 | 1176 | 1436 |
| LinJ17_V3.1050 | <i>L. infantum</i> | 83  | 46   | 128  |
| LinJ17_V3.1050 | <i>L. infantum</i> | 59  | 145  | 203  |
| LinJ17_V3.1050 | <i>L. infantum</i> | 77  | 246  | 322  |
| LinJ17_V3.1050 | <i>L. infantum</i> | 49  | 428  | 476  |
| LinJ17_V3.1050 | <i>L. infantum</i> | 79  | 539  | 617  |
| LinJ17_V3.1050 | <i>L. infantum</i> | 150 | 635  | 784  |
| LinJ17_V3.1050 | <i>L. infantum</i> | 48  | 854  | 901  |
| LinJ17_V3.1050 | <i>L. infantum</i> | 51  | 943  | 993  |
| LinJ17_V3.1060 | <i>L. infantum</i> | 454 | 1    | 454  |
| LinJ17_V3.1060 | <i>L. infantum</i> | 290 | 484  | 773  |
| LinJ17_V3.1060 | <i>L. infantum</i> | 129 | 815  | 943  |
| LinJ17_V3.1060 | <i>L. infantum</i> | 154 | 1296 | 1449 |
| LinJ17_V3.1070 | <i>L. infantum</i> | 547 | 1    | 547  |
| LinJ17_V3.1070 | <i>L. infantum</i> | 65  | 603  | 667  |
| LinJ17_V3.1070 | <i>L. infantum</i> | 400 | 855  | 1254 |
| LinJ17_V3.1070 | <i>L. infantum</i> | 53  | 1368 | 1420 |
| LinJ17_V3.1080 | <i>L. infantum</i> | 47  | 155  | 201  |

|                |                    |     |      |      |
|----------------|--------------------|-----|------|------|
| LinJ17_V3.1080 | <i>L. infantum</i> | 57  | 633  | 689  |
| LinJ17_V3.1080 | <i>L. infantum</i> | 57  | 633  | 689  |
| LinJ17_V3.1090 | <i>L. infantum</i> | 265 | 17   | 281  |
| LinJ17_V3.1090 | <i>L. infantum</i> | 229 | 322  | 550  |
| LinJ17_V3.1090 | <i>L. infantum</i> | 65  | 600  | 664  |
| LinJ17_V3.1090 | <i>L. infantum</i> | 97  | 700  | 796  |
| LinJ17_V3.1090 | <i>L. infantum</i> | 385 | 1029 | 1413 |
| LinJ17_V3.1090 | <i>L. infantum</i> | 64  | 1476 | 1539 |
| LinJ17_V3.1090 | <i>L. infantum</i> | 183 | 1551 | 1733 |
| LinJ17_V3.1090 | <i>L. infantum</i> | 130 | 1778 | 1907 |
| LinJ17_V3.1090 | <i>L. infantum</i> | 101 | 1949 | 2049 |
| LinJ17_V3.1090 | <i>L. infantum</i> | 40  | 2124 | 2163 |
| LinJ17_V3.1090 | <i>L. infantum</i> | 117 | 2245 | 2361 |
| LinJ17_V3.1090 | <i>L. infantum</i> | 115 | 2464 | 2578 |
| LinJ17_V3.1090 | <i>L. infantum</i> | 58  | 2868 | 2925 |
| LinJ17_V3.1090 | <i>L. infantum</i> | 100 | 3123 | 3222 |
| LinJ17_V3.1090 | <i>L. infantum</i> | 57  | 3257 | 3313 |
| LinJ17_V3.1090 | <i>L. infantum</i> | 104 | 3370 | 3473 |
| LinJ17_V3.1090 | <i>L. infantum</i> | 85  | 3658 | 3742 |
| LinJ17_V3.1090 | <i>L. infantum</i> | 565 | 3757 | 4321 |
| LinJ17_V3.1090 | <i>L. infantum</i> | 51  | 4516 | 4566 |
| LinJ17_V3.1090 | <i>L. infantum</i> | 46  | 4587 | 4632 |
| LinJ17_V3.1090 | <i>L. infantum</i> | 41  | 4665 | 4705 |
| LinJ17_V3.1090 | <i>L. infantum</i> | 66  | 4744 | 4809 |
| LinJ17_V3.1090 | <i>L. infantum</i> | 57  | 5063 | 5119 |
| LinJ17_V3.1090 | <i>L. infantum</i> | 166 | 5148 | 5313 |
| LinJ17_V3.1090 | <i>L. infantum</i> | 141 | 5446 | 5586 |
| LinJ17_V3.1090 | <i>L. infantum</i> | 171 | 5656 | 5826 |
| LinJ17_V3.1090 | <i>L. infantum</i> | 64  | 5863 | 5926 |
| LinJ17_V3.1090 | <i>L. infantum</i> | 113 | 5962 | 6074 |
| LinJ17_V3.1090 | <i>L. infantum</i> | 53  | 6120 | 6172 |
| LinJ17_V3.1090 | <i>L. infantum</i> | 71  | 6392 | 6462 |
| LinJ17_V3.1090 | <i>L. infantum</i> | 58  | 6484 | 6541 |
| LinJ17_V3.1090 | <i>L. infantum</i> | 261 | 6719 | 6979 |
| LinJ17_V3.1100 | <i>L. infantum</i> | 66  | 1    | 66   |
| LinJ17_V3.1100 | <i>L. infantum</i> | 118 | 241  | 358  |
| LinJ17_V3.1100 | <i>L. infantum</i> | 63  | 501  | 563  |
| LinJ17_V3.1120 | <i>L. infantum</i> | 44  | 292  | 335  |
| LinJ17_V3.1130 | <i>L. infantum</i> | 299 | 1    | 299  |
| LinJ17_V3.1130 | <i>L. infantum</i> | 178 | 334  | 511  |
| LinJ17_V3.1130 | <i>L. infantum</i> | 41  | 772  | 812  |
| LinJ17_V3.1140 | <i>L. infantum</i> | 41  | 201  | 241  |
| LinJ17_V3.1150 | <i>L. infantum</i> | 52  | 1    | 52   |
| LinJ17_V3.1160 | <i>L. infantum</i> | 76  | 1    | 76   |
| LinJ17_V3.1160 | <i>L. infantum</i> | 66  | 375  | 440  |
| LinJ17_V3.1160 | <i>L. infantum</i> | 152 | 493  | 644  |
| LinJ17_V3.1160 | <i>L. infantum</i> | 123 | 672  | 794  |

|                |                    |     |      |      |
|----------------|--------------------|-----|------|------|
| LinJ17_V3.1170 | <i>L. infantum</i> | 110 | 1    | 110  |
| LinJ17_V3.1170 | <i>L. infantum</i> | 47  | 113  | 159  |
| LinJ17_V3.1170 | <i>L. infantum</i> | 102 | 274  | 375  |
| LinJ17_V3.1180 | <i>L. infantum</i> | 143 | 1    | 143  |
| LinJ17_V3.1180 | <i>L. infantum</i> | 61  | 145  | 205  |
| LinJ17_V3.1180 | <i>L. infantum</i> | 45  | 346  | 390  |
| LinJ17_V3.1180 | <i>L. infantum</i> | 65  | 556  | 620  |
| LinJ17_V3.1180 | <i>L. infantum</i> | 62  | 671  | 732  |
| LinJ17_V3.1190 | <i>L. infantum</i> | 85  | 76   | 160  |
| LinJ17_V3.1190 | <i>L. infantum</i> | 64  | 200  | 263  |
| LinJ17_V3.1190 | <i>L. infantum</i> | 50  | 345  | 394  |
| LinJ17_V3.1190 | <i>L. infantum</i> | 59  | 472  | 530  |
| LinJ17_V3.1200 | <i>L. infantum</i> | 44  | 360  | 403  |
| LinJ17_V3.1210 | <i>L. infantum</i> | 65  | 365  | 429  |
| LinJ17_V3.1210 | <i>L. infantum</i> | 228 | 1151 | 1378 |
| LinJ17_V3.1230 | <i>L. infantum</i> | 79  | 1    | 79   |
| LinJ17_V3.1230 | <i>L. infantum</i> | 132 | 135  | 266  |
| LinJ17_V3.1230 | <i>L. infantum</i> | 40  | 612  | 651  |
| LinJ17_V3.1230 | <i>L. infantum</i> | 57  | 861  | 917  |
| LinJ17_V3.1230 | <i>L. infantum</i> | 100 | 1076 | 1175 |
| LinJ17_V3.1240 | <i>L. infantum</i> | 832 | 93   | 924  |
| LinJ17_V3.1240 | <i>L. infantum</i> | 422 | 976  | 1397 |
| LinJ17_V3.1250 | <i>L. infantum</i> | 55  | 167  | 221  |
| LinJ17_V3.1250 | <i>L. infantum</i> | 100 | 352  | 451  |
| LinJ17_V3.1250 | <i>L. infantum</i> | 54  | 508  | 561  |
| LinJ17_V3.1250 | <i>L. infantum</i> | 40  | 741  | 780  |
| LinJ17_V3.1250 | <i>L. infantum</i> | 104 | 825  | 928  |
| LinJ17_V3.1250 | <i>L. infantum</i> | 67  | 946  | 1012 |
| LinJ17_V3.1270 | <i>L. infantum</i> | 57  | 35   | 91   |
| LinJ17_V3.1270 | <i>L. infantum</i> | 104 | 136  | 239  |
| LinJ17_V3.1270 | <i>L. infantum</i> | 178 | 264  | 441  |
| LinJ17_V3.1270 | <i>L. infantum</i> | 107 | 492  | 598  |
| LinJ17_V3.1280 | <i>L. infantum</i> | 62  | 1    | 62   |
| LinJ17_V3.1280 | <i>L. infantum</i> | 343 | 202  | 544  |
| LinJ17_V3.1280 | <i>L. infantum</i> | 209 | 557  | 765  |
| LinJ17_V3.1290 | <i>L. infantum</i> | 53  | 1    | 53   |
| LinJ17_V3.1290 | <i>L. infantum</i> | 192 | 90   | 281  |
| LinJ17_V3.1290 | <i>L. infantum</i> | 124 | 333  | 456  |
| LinJ17_V3.1300 | <i>L. infantum</i> | 283 | 1    | 283  |
| LinJ17_V3.1300 | <i>L. infantum</i> | 112 | 300  | 411  |
| LinJ17_V3.1300 | <i>L. infantum</i> | 427 | 429  | 855  |
| LinJ17_V3.1310 | <i>L. infantum</i> | 45  | 1    | 45   |
| LinJ17_V3.1310 | <i>L. infantum</i> | 56  | 189  | 244  |
| LinJ17_V3.1310 | <i>L. infantum</i> | 156 | 300  | 455  |
| LinJ17_V3.1320 | <i>L. infantum</i> | 41  | 1    | 41   |
| LinJ17_V3.1330 | <i>L. infantum</i> | 43  | 56   | 98   |
| LinJ17_V3.1330 | <i>L. infantum</i> | 96  | 503  | 598  |



|                |                    |     |     |      |
|----------------|--------------------|-----|-----|------|
| LinJ17_V3.1330 | <i>L. infantum</i> | 180 | 778 | 957  |
| LinJ17_V3.1340 | <i>L. infantum</i> | 47  | 101 | 147  |
| LinJ17_V3.1340 | <i>L. infantum</i> | 68  | 278 | 345  |
| LinJ17_V3.1340 | <i>L. infantum</i> | 43  | 730 | 772  |
| LinJ17_V3.1340 | <i>L. infantum</i> | 42  | 859 | 900  |
| LinJ17_V3.1350 | <i>L. infantum</i> | 42  | 422 | 463  |
| LinJ17_V3.1350 | <i>L. infantum</i> | 48  | 660 | 707  |
| LinJ17_V3.1350 | <i>L. infantum</i> | 50  | 956 | 1005 |
| LinJ17_V3.1360 | <i>L. infantum</i> | 43  | 284 | 326  |
| LinJ17_V3.1360 | <i>L. infantum</i> | 94  | 358 | 451  |
| LinJ17_V3.1390 | <i>L. infantum</i> | 73  | 600 | 672  |
| LinJ17_V3.1410 | <i>L. infantum</i> | 50  | 102 | 151  |
| LinJ17_V3.1410 | <i>L. infantum</i> | 44  | 163 | 206  |
| LinJ17_V3.1410 | <i>L. infantum</i> | 124 | 523 | 646  |
| LinJ17_V3.1410 | <i>L. infantum</i> | 45  | 812 | 856  |
| LinJ17_V3.1420 | <i>L. infantum</i> | 44  | 77  | 120  |
| LinJ17_V3.1430 | <i>L. infantum</i> | 310 | 1   | 310  |
| LinJ17_V3.1460 | <i>L. infantum</i> | 46  | 40  | 85   |
| LinJ17_V3.1470 | <i>L. infantum</i> | 48  | 236 | 283  |
| LinJ17_V3.1480 | <i>L. infantum</i> | 71  | 229 | 299  |
| LinJ17_V3.1480 | <i>L. infantum</i> | 382 | 493 | 874  |
| LinJ17_V3.1500 | <i>L. infantum</i> | 69  | 106 | 174  |
| LinJ17_V3.1500 | <i>L. infantum</i> | 45  | 192 | 236  |
| LinJ17_V3.1500 | <i>L. infantum</i> | 78  | 283 | 360  |
| LinJ17_V3.1500 | <i>L. infantum</i> | 75  | 366 | 440  |
| LinJ17_V3.1500 | <i>L. infantum</i> | 54  | 730 | 783  |
| LinJ17_V3.1530 | <i>L. infantum</i> | 43  | 1   | 43   |
| LinJ17_V3.1530 | <i>L. infantum</i> | 73  | 425 | 497  |
| LinJ17_V3.1540 | <i>L. infantum</i> | 210 | 48  | 257  |
| LinJ17_V3.1550 | <i>L. infantum</i> | 58  | 1   | 58   |
| LinJ17_V3.1560 | <i>L. infantum</i> | 65  | 202 | 266  |
| LinJ17_V3.1560 | <i>L. infantum</i> | 57  | 565 | 621  |
| LinJ17_V3.1570 | <i>L. infantum</i> | 72  | 71  | 142  |
| LinJ17_V3.1590 | <i>L. infantum</i> | 193 | 51  | 243  |
| LinJ18_V3.0010 | <i>L. infantum</i> | 60  | 682 | 741  |
| LinJ18_V3.0030 | <i>L. infantum</i> | 66  | 87  | 152  |
| LinJ18_V3.0050 | <i>L. infantum</i> | 42  | 228 | 269  |
| LinJ18_V3.0050 | <i>L. infantum</i> | 72  | 706 | 777  |
| LinJ18_V3.0050 | <i>L. infantum</i> | 72  | 706 | 777  |
| LinJ18_V3.0060 | <i>L. infantum</i> | 43  | 115 | 157  |
| LinJ18_V3.0070 | <i>L. infantum</i> | 53  | 109 | 161  |
| LinJ18_V3.0070 | <i>L. infantum</i> | 157 | 186 | 342  |
| LinJ18_V3.0070 | <i>L. infantum</i> | 117 | 352 | 468  |
| LinJ18_V3.0070 | <i>L. infantum</i> | 231 | 494 | 724  |
| LinJ18_V3.0080 | <i>L. infantum</i> | 40  | 404 | 443  |
| LinJ18_V3.0100 | <i>L. infantum</i> | 89  | 126 | 214  |
| LinJ18_V3.0110 | <i>L. infantum</i> | 45  | 544 | 588  |

|                |                    |     |      |      |
|----------------|--------------------|-----|------|------|
| LinJ18_V3.0130 | <i>L. infantum</i> | 64  | 356  | 419  |
| LinJ18_V3.0130 | <i>L. infantum</i> | 54  | 650  | 703  |
| LinJ18_V3.0140 | <i>L. infantum</i> | 45  | 544  | 588  |
| LinJ18_V3.0140 | <i>L. infantum</i> | 49  | 697  | 745  |
| LinJ18_V3.0140 | <i>L. infantum</i> | 49  | 697  | 745  |
| LinJ18_V3.0170 | <i>L. infantum</i> | 141 | 207  | 347  |
| LinJ18_V3.0180 | <i>L. infantum</i> | 72  | 215  | 286  |
| LinJ18_V3.0190 | <i>L. infantum</i> | 43  | 197  | 239  |
| LinJ18_V3.0190 | <i>L. infantum</i> | 46  | 254  | 299  |
| LinJ18_V3.0190 | <i>L. infantum</i> | 46  | 254  | 299  |
| LinJ18_V3.0210 | <i>L. infantum</i> | 66  | 168  | 233  |
| LinJ18_V3.0220 | <i>L. infantum</i> | 329 | 81   | 409  |
| LinJ18_V3.0230 | <i>L. infantum</i> | 112 | 1    | 112  |
| LinJ18_V3.0240 | <i>L. infantum</i> | 48  | 279  | 326  |
| LinJ18_V3.0250 | <i>L. infantum</i> | 67  | 1    | 67   |
| LinJ18_V3.0250 | <i>L. infantum</i> | 45  | 98   | 142  |
| LinJ18_V3.0250 | <i>L. infantum</i> | 45  | 98   | 142  |
| LinJ18_V3.0270 | <i>L. infantum</i> | 43  | 1    | 43   |
| LinJ18_V3.0280 | <i>L. infantum</i> | 47  | 1    | 47   |
| LinJ18_V3.0280 | <i>L. infantum</i> | 55  | 237  | 291  |
| LinJ18_V3.0280 | <i>L. infantum</i> | 55  | 237  | 291  |
| LinJ18_V3.0290 | <i>L. infantum</i> | 40  | 26   | 65   |
| LinJ18_V3.0300 | <i>L. infantum</i> | 141 | 135  | 275  |
| LinJ18_V3.0330 | <i>L. infantum</i> | 78  | 100  | 177  |
| LinJ18_V3.0340 | <i>L. infantum</i> | 48  | 101  | 148  |
| LinJ18_V3.0340 | <i>L. infantum</i> | 65  | 289  | 353  |
| LinJ18_V3.0340 | <i>L. infantum</i> | 65  | 289  | 353  |
| LinJ18_V3.0350 | <i>L. infantum</i> | 43  | 1    | 43   |
| LinJ18_V3.0370 | <i>L. infantum</i> | 44  | 167  | 210  |
| LinJ18_V3.0380 | <i>L. infantum</i> | 72  | 304  | 375  |
| LinJ18_V3.0380 | <i>L. infantum</i> | 43  | 846  | 888  |
| LinJ18_V3.0380 | <i>L. infantum</i> | 43  | 846  | 888  |
| LinJ18_V3.0390 | <i>L. infantum</i> | 124 | 47   | 170  |
| LinJ18_V3.0390 | <i>L. infantum</i> | 205 | 212  | 416  |
| LinJ18_V3.0390 | <i>L. infantum</i> | 304 | 418  | 721  |
| LinJ18_V3.0390 | <i>L. infantum</i> | 471 | 725  | 1195 |
| LinJ18_V3.0390 | <i>L. infantum</i> | 170 | 1224 | 1393 |
| LinJ18_V3.0390 | <i>L. infantum</i> | 187 | 1560 | 1746 |
| LinJ18_V3.0400 | <i>L. infantum</i> | 114 | 104  | 217  |
| LinJ18_V3.0400 | <i>L. infantum</i> | 40  | 339  | 378  |
| LinJ18_V3.0410 | <i>L. infantum</i> | 88  | 57   | 144  |
| LinJ18_V3.0420 | <i>L. infantum</i> | 56  | 43   | 98   |
| LinJ18_V3.0430 | <i>L. infantum</i> | 88  | 282  | 369  |
| LinJ18_V3.0440 | <i>L. infantum</i> | 124 | 107  | 230  |
| LinJ18_V3.0460 | <i>L. infantum</i> | 60  | 95   | 154  |
| LinJ18_V3.0470 | <i>L. infantum</i> | 63  | 1    | 63   |
| LinJ18_V3.0470 | <i>L. infantum</i> | 207 | 127  | 333  |

|                |                    |     |      |      |
|----------------|--------------------|-----|------|------|
| LinJ18_V3.0480 | <i>L. infantum</i> | 149 | 4    | 152  |
| LinJ18_V3.0490 | <i>L. infantum</i> | 81  | 151  | 231  |
| LinJ18_V3.0500 | <i>L. infantum</i> | 92  | 1    | 92   |
| LinJ18_V3.0500 | <i>L. infantum</i> | 46  | 150  | 195  |
| LinJ18_V3.0500 | <i>L. infantum</i> | 80  | 301  | 380  |
| LinJ18_V3.0510 | <i>L. infantum</i> | 50  | 384  | 433  |
| LinJ18_V3.0520 | <i>L. infantum</i> | 368 | 1    | 368  |
| LinJ18_V3.0520 | <i>L. infantum</i> | 366 | 380  | 745  |
| LinJ18_V3.0530 | <i>L. infantum</i> | 50  | 127  | 176  |
| LinJ18_V3.0530 | <i>L. infantum</i> | 135 | 391  | 525  |
| LinJ18_V3.0540 | <i>L. infantum</i> | 95  | 419  | 513  |
| LinJ18_V3.0550 | <i>L. infantum</i> | 131 | 200  | 330  |
| LinJ18_V3.0570 | <i>L. infantum</i> | 50  | 558  | 607  |
| LinJ18_V3.0570 | <i>L. infantum</i> | 47  | 638  | 684  |
| LinJ18_V3.0570 | <i>L. infantum</i> | 47  | 638  | 684  |
| LinJ18_V3.0590 | <i>L. infantum</i> | 170 | 1    | 170  |
| LinJ18_V3.0590 | <i>L. infantum</i> | 175 | 247  | 421  |
| LinJ18_V3.0610 | <i>L. infantum</i> | 324 | 1    | 324  |
| LinJ18_V3.0610 | <i>L. infantum</i> | 211 | 352  | 562  |
| LinJ18_V3.0640 | <i>L. infantum</i> | 512 | 1    | 512  |
| LinJ18_V3.0660 | <i>L. infantum</i> | 106 | 58   | 163  |
| LinJ18_V3.0660 | <i>L. infantum</i> | 55  | 187  | 241  |
| LinJ18_V3.0660 | <i>L. infantum</i> | 62  | 255  | 316  |
| LinJ18_V3.0660 | <i>L. infantum</i> | 64  | 364  | 427  |
| LinJ18_V3.0660 | <i>L. infantum</i> | 62  | 469  | 530  |
| LinJ18_V3.0660 | <i>L. infantum</i> | 98  | 612  | 709  |
| LinJ18_V3.0660 | <i>L. infantum</i> | 85  | 813  | 897  |
| LinJ18_V3.0660 | <i>L. infantum</i> | 60  | 1000 | 1059 |
| LinJ18_V3.0660 | <i>L. infantum</i> | 80  | 1194 | 1273 |
| LinJ18_V3.0670 | <i>L. infantum</i> | 117 | 595  | 711  |
| LinJ18_V3.0680 | <i>L. infantum</i> | 211 | 1    | 211  |
| LinJ18_V3.0680 | <i>L. infantum</i> | 46  | 324  | 369  |
| LinJ18_V3.0680 | <i>L. infantum</i> | 124 | 461  | 584  |
| LinJ18_V3.0680 | <i>L. infantum</i> | 73  | 600  | 672  |
| LinJ18_V3.0690 | <i>L. infantum</i> | 50  | 1    | 50   |
| LinJ18_V3.0710 | <i>L. infantum</i> | 100 | 103  | 202  |
| LinJ18_V3.0710 | <i>L. infantum</i> | 42  | 373  | 414  |
| LinJ18_V3.0710 | <i>L. infantum</i> | 44  | 455  | 498  |
| LinJ18_V3.0710 | <i>L. infantum</i> | 120 | 537  | 656  |
| LinJ18_V3.0710 | <i>L. infantum</i> | 117 | 827  | 943  |
| LinJ18_V3.0710 | <i>L. infantum</i> | 87  | 1001 | 1087 |
| LinJ18_V3.0710 | <i>L. infantum</i> | 127 | 1163 | 1289 |
| LinJ18_V3.0710 | <i>L. infantum</i> | 190 | 1291 | 1480 |
| LinJ18_V3.0710 | <i>L. infantum</i> | 68  | 1489 | 1556 |
| LinJ18_V3.0720 | <i>L. infantum</i> | 102 | 146  | 247  |
| LinJ18_V3.0720 | <i>L. infantum</i> | 141 | 381  | 521  |
| LinJ18_V3.0720 | <i>L. infantum</i> | 43  | 537  | 579  |

|                |                    |     |      |      |
|----------------|--------------------|-----|------|------|
| LinJ18_V3.0720 | <i>L. infantum</i> | 41  | 680  | 720  |
| LinJ18_V3.0730 | <i>L. infantum</i> | 112 | 1    | 112  |
| LinJ18_V3.0750 | <i>L. infantum</i> | 214 | 63   | 276  |
| LinJ18_V3.0750 | <i>L. infantum</i> | 73  | 389  | 461  |
| LinJ18_V3.0770 | <i>L. infantum</i> | 62  | 64   | 125  |
| LinJ18_V3.0770 | <i>L. infantum</i> | 283 | 205  | 487  |
| LinJ18_V3.0770 | <i>L. infantum</i> | 109 | 503  | 611  |
| LinJ18_V3.0770 | <i>L. infantum</i> | 70  | 718  | 787  |
| LinJ18_V3.0770 | <i>L. infantum</i> | 50  | 819  | 868  |
| LinJ18_V3.0770 | <i>L. infantum</i> | 183 | 996  | 1178 |
| LinJ18_V3.0770 | <i>L. infantum</i> | 242 | 1219 | 1460 |
| LinJ18_V3.0770 | <i>L. infantum</i> | 93  | 1610 | 1702 |
| LinJ18_V3.0780 | <i>L. infantum</i> | 41  | 146  | 186  |
| LinJ18_V3.0790 | <i>L. infantum</i> | 53  | 65   | 117  |
| LinJ18_V3.0790 | <i>L. infantum</i> | 64  | 134  | 197  |
| LinJ18_V3.0800 | <i>L. infantum</i> | 52  | 68   | 119  |
| LinJ18_V3.0820 | <i>L. infantum</i> | 78  | 30   | 107  |
| LinJ18_V3.0820 | <i>L. infantum</i> | 57  | 156  | 212  |
| LinJ18_V3.0820 | <i>L. infantum</i> | 62  | 446  | 507  |
| LinJ18_V3.0850 | <i>L. infantum</i> | 166 | 24   | 189  |
| LinJ18_V3.0850 | <i>L. infantum</i> | 62  | 261  | 322  |
| LinJ18_V3.0850 | <i>L. infantum</i> | 102 | 359  | 460  |
| LinJ18_V3.0850 | <i>L. infantum</i> | 86  | 641  | 726  |
| LinJ18_V3.0850 | <i>L. infantum</i> | 55  | 771  | 825  |
| LinJ18_V3.0850 | <i>L. infantum</i> | 299 | 845  | 1143 |
| LinJ18_V3.0850 | <i>L. infantum</i> | 52  | 1229 | 1280 |
| LinJ18_V3.0850 | <i>L. infantum</i> | 189 | 1449 | 1637 |
| LinJ18_V3.0850 | <i>L. infantum</i> | 332 | 1655 | 1986 |
| LinJ18_V3.0850 | <i>L. infantum</i> | 82  | 2119 | 2200 |
| LinJ18_V3.0850 | <i>L. infantum</i> | 138 | 2234 | 2371 |
| LinJ18_V3.0850 | <i>L. infantum</i> | 115 | 2440 | 2554 |
| LinJ18_V3.0850 | <i>L. infantum</i> | 129 | 2663 | 2791 |
| LinJ18_V3.0860 | <i>L. infantum</i> | 89  | 55   | 143  |
| LinJ18_V3.0860 | <i>L. infantum</i> | 43  | 195  | 237  |
| LinJ18_V3.0860 | <i>L. infantum</i> | 68  | 276  | 343  |
| LinJ18_V3.0860 | <i>L. infantum</i> | 75  | 581  | 655  |
| LinJ18_V3.0860 | <i>L. infantum</i> | 126 | 731  | 856  |
| LinJ18_V3.0870 | <i>L. infantum</i> | 59  | 93   | 151  |
| LinJ18_V3.0870 | <i>L. infantum</i> | 41  | 194  | 234  |
| LinJ18_V3.0870 | <i>L. infantum</i> | 154 | 313  | 466  |
| LinJ18_V3.0880 | <i>L. infantum</i> | 83  | 79   | 161  |
| LinJ18_V3.0880 | <i>L. infantum</i> | 62  | 507  | 568  |
| LinJ18_V3.0880 | <i>L. infantum</i> | 154 | 699  | 852  |
| LinJ18_V3.0900 | <i>L. infantum</i> | 94  | 36   | 129  |
| LinJ18_V3.0900 | <i>L. infantum</i> | 41  | 467  | 507  |
| LinJ18_V3.0910 | <i>L. infantum</i> | 80  | 56   | 135  |
| LinJ18_V3.0910 | <i>L. infantum</i> | 49  | 169  | 217  |

|                |                    |     |      |      |
|----------------|--------------------|-----|------|------|
| LinJ18_V3.0910 | <i>L. infantum</i> | 51  | 299  | 349  |
| LinJ18_V3.0910 | <i>L. infantum</i> | 210 | 898  | 1107 |
| LinJ18_V3.0920 | <i>L. infantum</i> | 59  | 1    | 59   |
| LinJ18_V3.0920 | <i>L. infantum</i> | 84  | 410  | 493  |
| LinJ18_V3.0920 | <i>L. infantum</i> | 58  | 517  | 574  |
| LinJ18_V3.0930 | <i>L. infantum</i> | 116 | 86   | 201  |
| LinJ18_V3.0930 | <i>L. infantum</i> | 623 | 277  | 899  |
| LinJ18_V3.0940 | <i>L. infantum</i> | 44  | 145  | 188  |
| LinJ18_V3.0940 | <i>L. infantum</i> | 122 | 1136 | 1257 |
| LinJ18_V3.0950 | <i>L. infantum</i> | 215 | 28   | 242  |
| LinJ18_V3.0950 | <i>L. infantum</i> | 63  | 292  | 354  |
| LinJ18_V3.0950 | <i>L. infantum</i> | 63  | 292  | 354  |
| LinJ18_V3.0960 | <i>L. infantum</i> | 40  | 202  | 241  |
| LinJ18_V3.0960 | <i>L. infantum</i> | 45  | 337  | 381  |
| LinJ18_V3.0960 | <i>L. infantum</i> | 45  | 337  | 381  |
| LinJ18_V3.0970 | <i>L. infantum</i> | 929 | 1    | 929  |
| LinJ18_V3.0970 | <i>L. infantum</i> | 129 | 1128 | 1256 |
| LinJ18_V3.0970 | <i>L. infantum</i> | 94  | 1346 | 1439 |
| LinJ18_V3.0970 | <i>L. infantum</i> | 114 | 1461 | 1574 |
| LinJ18_V3.0970 | <i>L. infantum</i> | 401 | 1594 | 1994 |
| LinJ18_V3.0980 | <i>L. infantum</i> | 191 | 1    | 191  |
| LinJ18_V3.1000 | <i>L. infantum</i> | 41  | 1    | 41   |
| LinJ18_V3.1020 | <i>L. infantum</i> | 52  | 1    | 52   |
| LinJ18_V3.1020 | <i>L. infantum</i> | 126 | 72   | 197  |
| LinJ18_V3.1020 | <i>L. infantum</i> | 201 | 210  | 410  |
| LinJ18_V3.1020 | <i>L. infantum</i> | 69  | 423  | 491  |
| LinJ18_V3.1020 | <i>L. infantum</i> | 56  | 505  | 560  |
| LinJ18_V3.1020 | <i>L. infantum</i> | 176 | 568  | 743  |
| LinJ18_V3.1020 | <i>L. infantum</i> | 347 | 860  | 1206 |
| LinJ18_V3.1020 | <i>L. infantum</i> | 101 | 1236 | 1336 |
| LinJ18_V3.1030 | <i>L. infantum</i> | 247 | 112  | 358  |
| LinJ18_V3.1040 | <i>L. infantum</i> | 74  | 156  | 229  |
| LinJ18_V3.1050 | <i>L. infantum</i> | 45  | 662  | 706  |
| LinJ18_V3.1060 | <i>L. infantum</i> | 86  | 1    | 86   |
| LinJ18_V3.1060 | <i>L. infantum</i> | 54  | 423  | 476  |
| LinJ18_V3.1060 | <i>L. infantum</i> | 50  | 629  | 678  |
| LinJ18_V3.1060 | <i>L. infantum</i> | 44  | 1134 | 1177 |
| LinJ18_V3.1060 | <i>L. infantum</i> | 53  | 1381 | 1433 |
| LinJ18_V3.1070 | <i>L. infantum</i> | 40  | 501  | 540  |
| LinJ18_V3.1100 | <i>L. infantum</i> | 74  | 175  | 248  |
| LinJ18_V3.1110 | <i>L. infantum</i> | 56  | 44   | 99   |
| LinJ18_V3.1120 | <i>L. infantum</i> | 57  | 164  | 220  |
| LinJ18_V3.1130 | <i>L. infantum</i> | 96  | 93   | 188  |
| LinJ18_V3.1150 | <i>L. infantum</i> | 947 | 1    | 947  |
| LinJ18_V3.1160 | <i>L. infantum</i> | 117 | 1    | 117  |
| LinJ18_V3.1160 | <i>L. infantum</i> | 41  | 163  | 203  |
| LinJ18_V3.1190 | <i>L. infantum</i> | 117 | 1    | 117  |

|                |                    |     |     |      |
|----------------|--------------------|-----|-----|------|
| LinJ18_V3.1190 | <i>L. infantum</i> | 319 | 154 | 472  |
| LinJ18_V3.1190 | <i>L. infantum</i> | 200 | 562 | 761  |
| LinJ18_V3.1190 | <i>L. infantum</i> | 488 | 784 | 1271 |
| LinJ18_V3.1200 | <i>L. infantum</i> | 52  | 108 | 159  |
| LinJ18_V3.1200 | <i>L. infantum</i> | 55  | 177 | 231  |
| LinJ18_V3.1200 | <i>L. infantum</i> | 56  | 471 | 526  |
| LinJ18_V3.1200 | <i>L. infantum</i> | 50  | 990 | 1039 |
| LinJ18_V3.1210 | <i>L. infantum</i> | 198 | 44  | 241  |
| LinJ18_V3.1220 | <i>L. infantum</i> | 89  | 1   | 89   |
| LinJ18_V3.1220 | <i>L. infantum</i> | 42  | 261 | 302  |
| LinJ18_V3.1220 | <i>L. infantum</i> | 46  | 742 | 787  |
| LinJ18_V3.1230 | <i>L. infantum</i> | 43  | 174 | 216  |
| LinJ18_V3.1230 | <i>L. infantum</i> | 46  | 654 | 699  |
| LinJ18_V3.1230 | <i>L. infantum</i> | 46  | 654 | 699  |
| LinJ18_V3.1240 | <i>L. infantum</i> | 158 | 32  | 189  |
| LinJ18_V3.1240 | <i>L. infantum</i> | 72  | 480 | 551  |
| LinJ18_V3.1250 | <i>L. infantum</i> | 101 | 1   | 101  |
| LinJ18_V3.1250 | <i>L. infantum</i> | 63  | 156 | 218  |
| LinJ18_V3.1250 | <i>L. infantum</i> | 96  | 273 | 368  |
| LinJ18_V3.1250 | <i>L. infantum</i> | 206 | 463 | 668  |
| LinJ18_V3.1250 | <i>L. infantum</i> | 76  | 681 | 756  |
| LinJ18_V3.1260 | <i>L. infantum</i> | 54  | 1   | 54   |
| LinJ18_V3.1260 | <i>L. infantum</i> | 94  | 122 | 215  |
| LinJ18_V3.1260 | <i>L. infantum</i> | 94  | 220 | 313  |
| LinJ18_V3.1260 | <i>L. infantum</i> | 66  | 322 | 387  |
| LinJ18_V3.1260 | <i>L. infantum</i> | 92  | 420 | 511  |
| LinJ18_V3.1260 | <i>L. infantum</i> | 163 | 531 | 693  |
| LinJ18_V3.1260 | <i>L. infantum</i> | 56  | 742 | 797  |
| LinJ18_V3.1290 | <i>L. infantum</i> | 125 | 57  | 181  |
| LinJ18_V3.1290 | <i>L. infantum</i> | 93  | 240 | 332  |
| LinJ18_V3.1290 | <i>L. infantum</i> | 66  | 427 | 492  |
| LinJ18_V3.1290 | <i>L. infantum</i> | 129 | 603 | 731  |
| LinJ18_V3.1300 | <i>L. infantum</i> | 417 | 1   | 417  |
| LinJ18_V3.1300 | <i>L. infantum</i> | 61  | 544 | 604  |
| LinJ18_V3.1310 | <i>L. infantum</i> | 42  | 115 | 156  |
| LinJ18_V3.1320 | <i>L. infantum</i> | 216 | 1   | 216  |
| LinJ18_V3.1320 | <i>L. infantum</i> | 191 | 219 | 409  |
| LinJ18_V3.1320 | <i>L. infantum</i> | 85  | 559 | 643  |
| LinJ18_V3.1320 | <i>L. infantum</i> | 103 | 665 | 767  |
| LinJ18_V3.1330 | <i>L. infantum</i> | 64  | 18  | 81   |
| LinJ18_V3.1330 | <i>L. infantum</i> | 179 | 105 | 283  |
| LinJ18_V3.1330 | <i>L. infantum</i> | 143 | 439 | 581  |
| LinJ18_V3.1340 | <i>L. infantum</i> | 299 | 1   | 299  |
| LinJ18_V3.1340 | <i>L. infantum</i> | 611 | 351 | 961  |
| LinJ18_V3.1360 | <i>L. infantum</i> | 48  | 1   | 48   |
| LinJ18_V3.1360 | <i>L. infantum</i> | 73  | 282 | 354  |
| LinJ18_V3.1360 | <i>L. infantum</i> | 73  | 282 | 354  |

|                |                    |     |      |      |
|----------------|--------------------|-----|------|------|
| LinJ18_V3.1370 | <i>L. infantum</i> | 55  | 1    | 55   |
| LinJ18_V3.1380 | <i>L. infantum</i> | 51  | 1    | 51   |
| LinJ18_V3.1380 | <i>L. infantum</i> | 71  | 98   | 168  |
| LinJ18_V3.1390 | <i>L. infantum</i> | 564 | 68   | 631  |
| LinJ18_V3.1390 | <i>L. infantum</i> | 113 | 644  | 756  |
| LinJ18_V3.1400 | <i>L. infantum</i> | 83  | 88   | 170  |
| LinJ18_V3.1400 | <i>L. infantum</i> | 355 | 541  | 895  |
| LinJ18_V3.1410 | <i>L. infantum</i> | 258 | 80   | 337  |
| LinJ18_V3.1410 | <i>L. infantum</i> | 312 | 349  | 660  |
| LinJ18_V3.1410 | <i>L. infantum</i> | 403 | 719  | 1121 |
| LinJ18_V3.1430 | <i>L. infantum</i> | 866 | 1    | 866  |
| LinJ18_V3.1430 | <i>L. infantum</i> | 65  | 953  | 1017 |
| LinJ18_V3.1430 | <i>L. infantum</i> | 117 | 1153 | 1269 |
| LinJ18_V3.1430 | <i>L. infantum</i> | 68  | 1363 | 1430 |
| LinJ18_V3.1430 | <i>L. infantum</i> | 106 | 1486 | 1591 |
| LinJ18_V3.1430 | <i>L. infantum</i> | 388 | 1660 | 2047 |
| LinJ18_V3.1440 | <i>L. infantum</i> | 260 | 1    | 260  |
| LinJ18_V3.1440 | <i>L. infantum</i> | 107 | 297  | 403  |
| LinJ18_V3.1450 | <i>L. infantum</i> | 42  | 154  | 195  |
| LinJ18_V3.1480 | <i>L. infantum</i> | 85  | 15   | 99   |
| LinJ18_V3.1480 | <i>L. infantum</i> | 52  | 210  | 261  |
| LinJ18_V3.1480 | <i>L. infantum</i> | 140 | 379  | 518  |
| LinJ18_V3.1480 | <i>L. infantum</i> | 132 | 613  | 744  |
| LinJ18_V3.1500 | <i>L. infantum</i> | 82  | 1    | 82   |
| LinJ18_V3.1500 | <i>L. infantum</i> | 61  | 904  | 964  |
| LinJ18_V3.1510 | <i>L. infantum</i> | 82  | 1    | 82   |
| LinJ18_V3.1510 | <i>L. infantum</i> | 71  | 904  | 974  |
| LinJ18_V3.1520 | <i>L. infantum</i> | 190 | 1    | 190  |
| LinJ18_V3.1520 | <i>L. infantum</i> | 70  | 300  | 369  |
| LinJ18_V3.1520 | <i>L. infantum</i> | 134 | 605  | 738  |
| LinJ18_V3.1520 | <i>L. infantum</i> | 340 | 902  | 1241 |
| LinJ18_V3.1540 | <i>L. infantum</i> | 65  | 213  | 277  |
| LinJ18_V3.1550 | <i>L. infantum</i> | 45  | 170  | 214  |
| LinJ18_V3.1590 | <i>L. infantum</i> | 42  | 1    | 42   |
| LinJ18_V3.1590 | <i>L. infantum</i> | 85  | 324  | 408  |
| LinJ18_V3.1590 | <i>L. infantum</i> | 219 | 578  | 796  |
| LinJ18_V3.1600 | <i>L. infantum</i> | 154 | 1    | 154  |
| LinJ18_V3.1600 | <i>L. infantum</i> | 45  | 610  | 654  |
| LinJ18_V3.1630 | <i>L. infantum</i> | 72  | 49   | 120  |
| LinJ18_V3.1650 | <i>L. infantum</i> | 62  | 76   | 137  |
| LinJ18_V3.1650 | <i>L. infantum</i> | 47  | 468  | 514  |
| LinJ18_V3.1650 | <i>L. infantum</i> | 47  | 468  | 514  |
| LinJ18_V3.1670 | <i>L. infantum</i> | 59  | 35   | 93   |
| LinJ18_V3.1670 | <i>L. infantum</i> | 180 | 128  | 307  |
| LinJ18_V3.1670 | <i>L. infantum</i> | 69  | 402  | 470  |
| LinJ18_V3.1670 | <i>L. infantum</i> | 58  | 492  | 549  |
| LinJ19_V3.0010 | <i>L. infantum</i> | 200 | 1    | 200  |

|                |                    |     |      |      |
|----------------|--------------------|-----|------|------|
| LinJ19_V3.0020 | <i>L. infantum</i> | 87  | 1    | 87   |
| LinJ19_V3.0020 | <i>L. infantum</i> | 154 | 104  | 257  |
| LinJ19_V3.0030 | <i>L. infantum</i> | 54  | 1    | 54   |
| LinJ19_V3.0050 | <i>L. infantum</i> | 48  | 1    | 48   |
| LinJ19_V3.0060 | <i>L. infantum</i> | 163 | 1    | 163  |
| LinJ19_V3.0060 | <i>L. infantum</i> | 56  | 276  | 331  |
| LinJ19_V3.0070 | <i>L. infantum</i> | 375 | 58   | 432  |
| LinJ19_V3.0080 | <i>L. infantum</i> | 64  | 1    | 64   |
| LinJ19_V3.0080 | <i>L. infantum</i> | 54  | 154  | 207  |
| LinJ19_V3.0080 | <i>L. infantum</i> | 52  | 243  | 294  |
| LinJ19_V3.0090 | <i>L. infantum</i> | 60  | 1    | 60   |
| LinJ19_V3.0100 | <i>L. infantum</i> | 247 | 1    | 247  |
| LinJ19_V3.0110 | <i>L. infantum</i> | 144 | 55   | 198  |
| LinJ19_V3.0120 | <i>L. infantum</i> | 41  | 213  | 253  |
| LinJ19_V3.0130 | <i>L. infantum</i> | 211 | 351  | 561  |
| LinJ19_V3.0160 | <i>L. infantum</i> | 90  | 122  | 211  |
| LinJ19_V3.0160 | <i>L. infantum</i> | 50  | 461  | 510  |
| LinJ19_V3.0160 | <i>L. infantum</i> | 100 | 1392 | 1491 |
| LinJ19_V3.0170 | <i>L. infantum</i> | 118 | 290  | 407  |
| LinJ19_V3.0180 | <i>L. infantum</i> | 87  | 1    | 87   |
| LinJ19_V3.0180 | <i>L. infantum</i> | 46  | 118  | 163  |
| LinJ19_V3.0220 | <i>L. infantum</i> | 55  | 1    | 55   |
| LinJ19_V3.0220 | <i>L. infantum</i> | 44  | 203  | 246  |
| LinJ19_V3.0230 | <i>L. infantum</i> | 109 | 1    | 109  |
| LinJ19_V3.0230 | <i>L. infantum</i> | 48  | 446  | 493  |
| LinJ19_V3.0230 | <i>L. infantum</i> | 59  | 614  | 672  |
| LinJ19_V3.0240 | <i>L. infantum</i> | 102 | 244  | 345  |
| LinJ19_V3.0240 | <i>L. infantum</i> | 74  | 657  | 730  |
| LinJ19_V3.0250 | <i>L. infantum</i> | 40  | 1    | 40   |
| LinJ19_V3.0250 | <i>L. infantum</i> | 49  | 145  | 193  |
| LinJ19_V3.0250 | <i>L. infantum</i> | 158 | 261  | 418  |
| LinJ19_V3.0260 | <i>L. infantum</i> | 432 | 1    | 432  |
| LinJ19_V3.0260 | <i>L. infantum</i> | 309 | 491  | 799  |
| LinJ19_V3.0270 | <i>L. infantum</i> | 197 | 435  | 631  |
| LinJ19_V3.0280 | <i>L. infantum</i> | 49  | 37   | 85   |
| LinJ19_V3.0280 | <i>L. infantum</i> | 143 | 141  | 283  |
| LinJ19_V3.0280 | <i>L. infantum</i> | 55  | 467  | 521  |
| LinJ19_V3.0280 | <i>L. infantum</i> | 52  | 552  | 603  |
| LinJ19_V3.0280 | <i>L. infantum</i> | 87  | 661  | 747  |
| LinJ19_V3.0280 | <i>L. infantum</i> | 44  | 939  | 982  |
| LinJ19_V3.0280 | <i>L. infantum</i> | 59  | 1002 | 1060 |
| LinJ19_V3.0280 | <i>L. infantum</i> | 48  | 1068 | 1115 |
| LinJ19_V3.0280 | <i>L. infantum</i> | 150 | 1193 | 1342 |
| LinJ19_V3.0290 | <i>L. infantum</i> | 96  | 124  | 219  |
| LinJ19_V3.0300 | <i>L. infantum</i> | 59  | 1    | 59   |
| LinJ19_V3.0300 | <i>L. infantum</i> | 77  | 169  | 245  |
| LinJ19_V3.0300 | <i>L. infantum</i> | 101 | 292  | 392  |



|                |                    |     |      |      |
|----------------|--------------------|-----|------|------|
| LinJ19_V3.0310 | <i>L. infantum</i> | 40  | 99   | 138  |
| LinJ19_V3.0320 | <i>L. infantum</i> | 42  | 1    | 42   |
| LinJ19_V3.0320 | <i>L. infantum</i> | 60  | 181  | 240  |
| LinJ19_V3.0320 | <i>L. infantum</i> | 57  | 402  | 458  |
| LinJ19_V3.0340 | <i>L. infantum</i> | 108 | 84   | 191  |
| LinJ19_V3.0350 | <i>L. infantum</i> | 44  | 1    | 44   |
| LinJ19_V3.0350 | <i>L. infantum</i> | 86  | 52   | 137  |
| LinJ19_V3.0350 | <i>L. infantum</i> | 48  | 273  | 320  |
| LinJ19_V3.0360 | <i>L. infantum</i> | 110 | 71   | 180  |
| LinJ19_V3.0360 | <i>L. infantum</i> | 201 | 214  | 414  |
| LinJ19_V3.0360 | <i>L. infantum</i> | 49  | 426  | 474  |
| LinJ19_V3.0360 | <i>L. infantum</i> | 78  | 479  | 556  |
| LinJ19_V3.0360 | <i>L. infantum</i> | 284 | 572  | 855  |
| LinJ19_V3.0360 | <i>L. infantum</i> | 253 | 860  | 1112 |
| LinJ19_V3.0360 | <i>L. infantum</i> | 220 | 1381 | 1600 |
| LinJ19_V3.0360 | <i>L. infantum</i> | 49  | 1705 | 1753 |
| LinJ19_V3.0360 | <i>L. infantum</i> | 42  | 1776 | 1817 |
| LinJ19_V3.0370 | <i>L. infantum</i> | 65  | 1    | 65   |
| LinJ19_V3.0370 | <i>L. infantum</i> | 392 | 71   | 462  |
| LinJ19_V3.0370 | <i>L. infantum</i> | 206 | 480  | 685  |
| LinJ19_V3.0370 | <i>L. infantum</i> | 413 | 740  | 1152 |
| LinJ19_V3.0390 | <i>L. infantum</i> | 56  | 1    | 56   |
| LinJ19_V3.0400 | <i>L. infantum</i> | 46  | 154  | 199  |
| LinJ19_V3.0410 | <i>L. infantum</i> | 44  | 1    | 44   |
| LinJ19_V3.0420 | <i>L. infantum</i> | 58  | 58   | 115  |
| LinJ19_V3.0430 | <i>L. infantum</i> | 51  | 44   | 94   |
| LinJ19_V3.0430 | <i>L. infantum</i> | 140 | 155  | 294  |
| LinJ19_V3.0430 | <i>L. infantum</i> | 73  | 303  | 375  |
| LinJ19_V3.0430 | <i>L. infantum</i> | 52  | 470  | 521  |
| LinJ19_V3.0430 | <i>L. infantum</i> | 51  | 1080 | 1130 |
| LinJ19_V3.0440 | <i>L. infantum</i> | 50  | 1    | 50   |
| LinJ19_V3.0440 | <i>L. infantum</i> | 68  | 216  | 283  |
| LinJ19_V3.0440 | <i>L. infantum</i> | 53  | 298  | 350  |
| LinJ19_V3.0450 | <i>L. infantum</i> | 591 | 55   | 645  |
| LinJ19_V3.0450 | <i>L. infantum</i> | 87  | 699  | 785  |
| LinJ19_V3.0450 | <i>L. infantum</i> | 60  | 817  | 876  |
| LinJ19_V3.0460 | <i>L. infantum</i> | 188 | 53   | 240  |
| LinJ19_V3.0470 | <i>L. infantum</i> | 106 | 91   | 196  |
| LinJ19_V3.0470 | <i>L. infantum</i> | 96  | 264  | 359  |
| LinJ19_V3.0480 | <i>L. infantum</i> | 91  | 1    | 91   |
| LinJ19_V3.0490 | <i>L. infantum</i> | 81  | 1    | 81   |
| LinJ19_V3.0500 | <i>L. infantum</i> | 106 | 27   | 132  |
| LinJ19_V3.0500 | <i>L. infantum</i> | 140 | 136  | 275  |
| LinJ19_V3.0500 | <i>L. infantum</i> | 140 | 136  | 275  |
| LinJ19_V3.0510 | <i>L. infantum</i> | 152 | 1    | 152  |
| LinJ19_V3.0510 | <i>L. infantum</i> | 109 | 193  | 301  |
| LinJ19_V3.0510 | <i>L. infantum</i> | 209 | 320  | 528  |

|                |                    |     |      |      |
|----------------|--------------------|-----|------|------|
| LinJ19_V3.0510 | <i>L. infantum</i> | 129 | 607  | 735  |
| LinJ19_V3.0510 | <i>L. infantum</i> | 119 | 822  | 940  |
| LinJ19_V3.0510 | <i>L. infantum</i> | 48  | 969  | 1016 |
| LinJ19_V3.0510 | <i>L. infantum</i> | 132 | 1026 | 1157 |
| LinJ19_V3.0510 | <i>L. infantum</i> | 151 | 1176 | 1326 |
| LinJ19_V3.0510 | <i>L. infantum</i> | 101 | 1505 | 1605 |
| LinJ19_V3.0520 | <i>L. infantum</i> | 50  | 42   | 91   |
| LinJ19_V3.0520 | <i>L. infantum</i> | 98  | 195  | 292  |
| LinJ19_V3.0520 | <i>L. infantum</i> | 98  | 195  | 292  |
| LinJ19_V3.0530 | <i>L. infantum</i> | 165 | 1    | 165  |
| LinJ19_V3.0530 | <i>L. infantum</i> | 41  | 457  | 497  |
| LinJ19_V3.0530 | <i>L. infantum</i> | 124 | 512  | 635  |
| LinJ19_V3.0530 | <i>L. infantum</i> | 101 | 642  | 742  |
| LinJ19_V3.0540 | <i>L. infantum</i> | 67  | 65   | 131  |
| LinJ19_V3.0550 | <i>L. infantum</i> | 94  | 126  | 219  |
| LinJ19_V3.0550 | <i>L. infantum</i> | 204 | 229  | 432  |
| LinJ19_V3.0550 | <i>L. infantum</i> | 115 | 583  | 697  |
| LinJ19_V3.0550 | <i>L. infantum</i> | 94  | 1071 | 1164 |
| LinJ19_V3.0550 | <i>L. infantum</i> | 65  | 1204 | 1268 |
| LinJ19_V3.0590 | <i>L. infantum</i> | 276 | 1    | 276  |
| LinJ19_V3.0590 | <i>L. infantum</i> | 256 | 312  | 567  |
| LinJ19_V3.0590 | <i>L. infantum</i> | 121 | 583  | 703  |
| LinJ19_V3.0590 | <i>L. infantum</i> | 198 | 921  | 1118 |
| LinJ19_V3.0590 | <i>L. infantum</i> | 128 | 1243 | 1370 |
| LinJ19_V3.0590 | <i>L. infantum</i> | 42  | 1382 | 1423 |
| LinJ19_V3.0590 | <i>L. infantum</i> | 107 | 1503 | 1609 |
| LinJ19_V3.0600 | <i>L. infantum</i> | 449 | 1    | 449  |
| LinJ19_V3.0600 | <i>L. infantum</i> | 59  | 451  | 509  |
| LinJ19_V3.0600 | <i>L. infantum</i> | 69  | 517  | 585  |
| LinJ19_V3.0600 | <i>L. infantum</i> | 55  | 723  | 777  |
| LinJ19_V3.0620 | <i>L. infantum</i> | 64  | 236  | 299  |
| LinJ19_V3.0620 | <i>L. infantum</i> | 51  | 430  | 480  |
| LinJ19_V3.0620 | <i>L. infantum</i> | 47  | 608  | 654  |
| LinJ19_V3.0630 | <i>L. infantum</i> | 57  | 1    | 57   |
| LinJ19_V3.0650 | <i>L. infantum</i> | 40  | 299  | 338  |
| LinJ19_V3.0650 | <i>L. infantum</i> | 55  | 899  | 953  |
| LinJ19_V3.0650 | <i>L. infantum</i> | 42  | 983  | 1024 |
| LinJ19_V3.0650 | <i>L. infantum</i> | 42  | 1205 | 1246 |
| LinJ19_V3.0650 | <i>L. infantum</i> | 43  | 1278 | 1320 |
| LinJ19_V3.0650 | <i>L. infantum</i> | 257 | 1478 | 1734 |
| LinJ19_V3.0650 | <i>L. infantum</i> | 132 | 1800 | 1931 |
| LinJ19_V3.0660 | <i>L. infantum</i> | 129 | 1    | 129  |
| LinJ19_V3.0670 | <i>L. infantum</i> | 186 | 1    | 186  |
| LinJ19_V3.0680 | <i>L. infantum</i> | 88  | 1    | 88   |
| LinJ19_V3.0680 | <i>L. infantum</i> | 55  | 161  | 215  |
| LinJ19_V3.0680 | <i>L. infantum</i> | 49  | 267  | 315  |
| LinJ19_V3.0680 | <i>L. infantum</i> | 88  | 620  | 707  |

|                |                    |      |      |      |
|----------------|--------------------|------|------|------|
| LinJ19_V3.0680 | <i>L. infantum</i> | 211  | 776  | 986  |
| LinJ19_V3.0680 | <i>L. infantum</i> | 97   | 1031 | 1127 |
| LinJ19_V3.0690 | <i>L. infantum</i> | 85   | 1    | 85   |
| LinJ19_V3.0690 | <i>L. infantum</i> | 54   | 163  | 216  |
| LinJ19_V3.0690 | <i>L. infantum</i> | 49   | 275  | 323  |
| LinJ19_V3.0690 | <i>L. infantum</i> | 63   | 643  | 705  |
| LinJ19_V3.0690 | <i>L. infantum</i> | 218  | 760  | 977  |
| LinJ19_V3.0690 | <i>L. infantum</i> | 69   | 1031 | 1099 |
| LinJ19_V3.0700 | <i>L. infantum</i> | 90   | 214  | 303  |
| LinJ19_V3.0700 | <i>L. infantum</i> | 47   | 339  | 385  |
| LinJ19_V3.0700 | <i>L. infantum</i> | 340  | 568  | 907  |
| LinJ19_V3.0700 | <i>L. infantum</i> | 1338 | 943  | 2280 |
| LinJ19_V3.0720 | <i>L. infantum</i> | 47   | 33   | 79   |
| LinJ19_V3.0720 | <i>L. infantum</i> | 152  | 96   | 247  |
| LinJ19_V3.0730 | <i>L. infantum</i> | 92   | 294  | 385  |
| LinJ19_V3.0740 | <i>L. infantum</i> | 113  | 125  | 237  |
| LinJ19_V3.0740 | <i>L. infantum</i> | 57   | 349  | 405  |
| LinJ19_V3.0740 | <i>L. infantum</i> | 57   | 349  | 405  |
| LinJ19_V3.0750 | <i>L. infantum</i> | 62   | 35   | 96   |
| LinJ19_V3.0750 | <i>L. infantum</i> | 47   | 119  | 165  |
| LinJ19_V3.0750 | <i>L. infantum</i> | 57   | 468  | 524  |
| LinJ19_V3.0760 | <i>L. infantum</i> | 108  | 167  | 274  |
| LinJ19_V3.0760 | <i>L. infantum</i> | 46   | 329  | 374  |
| LinJ19_V3.0760 | <i>L. infantum</i> | 46   | 329  | 374  |
| LinJ19_V3.0770 | <i>L. infantum</i> | 41   | 59   | 99   |
| LinJ19_V3.0770 | <i>L. infantum</i> | 49   | 141  | 189  |
| LinJ19_V3.0770 | <i>L. infantum</i> | 49   | 141  | 189  |
| LinJ19_V3.0790 | <i>L. infantum</i> | 78   | 370  | 447  |
| LinJ19_V3.0790 | <i>L. infantum</i> | 124  | 618  | 741  |
| LinJ19_V3.0800 | <i>L. infantum</i> | 63   | 1    | 63   |
| LinJ19_V3.0810 | <i>L. infantum</i> | 45   | 47   | 91   |
| LinJ19_V3.0810 | <i>L. infantum</i> | 138  | 732  | 869  |
| LinJ19_V3.0810 | <i>L. infantum</i> | 138  | 732  | 869  |
| LinJ19_V3.0860 | <i>L. infantum</i> | 61   | 1    | 61   |
| LinJ19_V3.0870 | <i>L. infantum</i> | 73   | 278  | 350  |
| LinJ19_V3.0880 | <i>L. infantum</i> | 63   | 75   | 137  |
| LinJ19_V3.0880 | <i>L. infantum</i> | 85   | 263  | 347  |
| LinJ19_V3.0880 | <i>L. infantum</i> | 70   | 383  | 452  |
| LinJ19_V3.0880 | <i>L. infantum</i> | 232  | 529  | 760  |
| LinJ19_V3.0880 | <i>L. infantum</i> | 48   | 861  | 908  |
| LinJ19_V3.0890 | <i>L. infantum</i> | 484  | 96   | 579  |
| LinJ19_V3.0900 | <i>L. infantum</i> | 152  | 117  | 268  |
| LinJ19_V3.0900 | <i>L. infantum</i> | 101  | 270  | 370  |
| LinJ19_V3.0900 | <i>L. infantum</i> | 72   | 373  | 444  |
| LinJ19_V3.0900 | <i>L. infantum</i> | 208  | 480  | 687  |
| LinJ19_V3.0930 | <i>L. infantum</i> | 393  | 24   | 416  |
| LinJ19_V3.0930 | <i>L. infantum</i> | 67   | 469  | 535  |

|                |                    |     |      |      |
|----------------|--------------------|-----|------|------|
| LinJ19_V3.0930 | <i>L. infantum</i> | 88  | 676  | 763  |
| LinJ19_V3.0950 | <i>L. infantum</i> | 42  | 540  | 581  |
| LinJ19_V3.0970 | <i>L. infantum</i> | 89  | 515  | 603  |
| LinJ19_V3.0980 | <i>L. infantum</i> | 85  | 67   | 151  |
| LinJ19_V3.0980 | <i>L. infantum</i> | 53  | 242  | 294  |
| LinJ19_V3.0980 | <i>L. infantum</i> | 98  | 343  | 440  |
| LinJ19_V3.0980 | <i>L. infantum</i> | 88  | 445  | 532  |
| LinJ19_V3.0980 | <i>L. infantum</i> | 160 | 582  | 741  |
| LinJ19_V3.0990 | <i>L. infantum</i> | 73  | 1    | 73   |
| LinJ19_V3.0990 | <i>L. infantum</i> | 56  | 321  | 376  |
| LinJ19_V3.0990 | <i>L. infantum</i> | 56  | 321  | 376  |
| LinJ19_V3.1000 | <i>L. infantum</i> | 295 | 1    | 295  |
| LinJ19_V3.1010 | <i>L. infantum</i> | 46  | 304  | 349  |
| LinJ19_V3.1020 | <i>L. infantum</i> | 50  | 132  | 181  |
| LinJ19_V3.1020 | <i>L. infantum</i> | 482 | 230  | 711  |
| LinJ19_V3.1020 | <i>L. infantum</i> | 280 | 833  | 1112 |
| LinJ19_V3.1020 | <i>L. infantum</i> | 225 | 1145 | 1369 |
| LinJ19_V3.1030 | <i>L. infantum</i> | 111 | 14   | 124  |
| LinJ19_V3.1030 | <i>L. infantum</i> | 259 | 208  | 466  |
| LinJ19_V3.1030 | <i>L. infantum</i> | 68  | 519  | 586  |
| LinJ19_V3.1030 | <i>L. infantum</i> | 86  | 647  | 732  |
| LinJ19_V3.1030 | <i>L. infantum</i> | 54  | 743  | 796  |
| LinJ19_V3.1030 | <i>L. infantum</i> | 178 | 835  | 1012 |
| LinJ19_V3.1030 | <i>L. infantum</i> | 218 | 1039 | 1256 |
| LinJ19_V3.1040 | <i>L. infantum</i> | 80  | 74   | 153  |
| LinJ19_V3.1040 | <i>L. infantum</i> | 82  | 172  | 253  |
| LinJ19_V3.1040 | <i>L. infantum</i> | 47  | 342  | 388  |
| LinJ19_V3.1040 | <i>L. infantum</i> | 250 | 472  | 721  |
| LinJ19_V3.1040 | <i>L. infantum</i> | 79  | 900  | 978  |
| LinJ19_V3.1050 | <i>L. infantum</i> | 55  | 17   | 71   |
| LinJ19_V3.1050 | <i>L. infantum</i> | 140 | 88   | 227  |
| LinJ19_V3.1050 | <i>L. infantum</i> | 49  | 248  | 296  |
| LinJ19_V3.1050 | <i>L. infantum</i> | 165 | 355  | 519  |
| LinJ19_V3.1060 | <i>L. infantum</i> | 624 | 1    | 624  |
| LinJ19_V3.1060 | <i>L. infantum</i> | 266 | 636  | 901  |
| LinJ19_V3.1060 | <i>L. infantum</i> | 147 | 948  | 1094 |
| LinJ19_V3.1060 | <i>L. infantum</i> | 76  | 1395 | 1470 |
| LinJ19_V3.1060 | <i>L. infantum</i> | 211 | 1484 | 1694 |
| LinJ19_V3.1060 | <i>L. infantum</i> | 97  | 1738 | 1834 |
| LinJ19_V3.1060 | <i>L. infantum</i> | 60  | 2103 | 2162 |
| LinJ19_V3.1060 | <i>L. infantum</i> | 42  | 2340 | 2381 |
| LinJ19_V3.1060 | <i>L. infantum</i> | 90  | 2395 | 2484 |
| LinJ19_V3.1070 | <i>L. infantum</i> | 55  | 142  | 196  |
| LinJ19_V3.1080 | <i>L. infantum</i> | 758 | 1    | 758  |
| LinJ19_V3.1080 | <i>L. infantum</i> | 93  | 779  | 871  |
| LinJ19_V3.1080 | <i>L. infantum</i> | 81  | 917  | 997  |
| LinJ19_V3.1080 | <i>L. infantum</i> | 178 | 1012 | 1189 |

|                |                    |     |      |      |
|----------------|--------------------|-----|------|------|
| LinJ19_V3.1080 | <i>L. infantum</i> | 105 | 1205 | 1309 |
| LinJ19_V3.1110 | <i>L. infantum</i> | 44  | 42   | 85   |
| LinJ19_V3.1110 | <i>L. infantum</i> | 163 | 284  | 446  |
| LinJ19_V3.1110 | <i>L. infantum</i> | 43  | 619  | 661  |
| LinJ19_V3.1110 | <i>L. infantum</i> | 78  | 687  | 764  |
| LinJ19_V3.1110 | <i>L. infantum</i> | 58  | 805  | 862  |
| LinJ19_V3.1110 | <i>L. infantum</i> | 63  | 928  | 990  |
| LinJ19_V3.1110 | <i>L. infantum</i> | 62  | 1069 | 1130 |
| LinJ19_V3.1110 | <i>L. infantum</i> | 42  | 1261 | 1302 |
| LinJ19_V3.1110 | <i>L. infantum</i> | 52  | 1355 | 1406 |
| LinJ19_V3.1110 | <i>L. infantum</i> | 59  | 1410 | 1468 |
| LinJ19_V3.1110 | <i>L. infantum</i> | 153 | 1515 | 1667 |
| LinJ19_V3.1110 | <i>L. infantum</i> | 98  | 1694 | 1791 |
| LinJ19_V3.1110 | <i>L. infantum</i> | 55  | 1803 | 1857 |
| LinJ19_V3.1110 | <i>L. infantum</i> | 45  | 2106 | 2150 |
| LinJ19_V3.1110 | <i>L. infantum</i> | 82  | 2291 | 2372 |
| LinJ19_V3.1110 | <i>L. infantum</i> | 41  | 2558 | 2598 |
| LinJ19_V3.1110 | <i>L. infantum</i> | 57  | 2643 | 2699 |
| LinJ19_V3.1110 | <i>L. infantum</i> | 116 | 2797 | 2912 |
| LinJ19_V3.1110 | <i>L. infantum</i> | 64  | 2960 | 3023 |
| LinJ19_V3.1110 | <i>L. infantum</i> | 41  | 3338 | 3378 |
| LinJ19_V3.1110 | <i>L. infantum</i> | 101 | 3398 | 3498 |
| LinJ19_V3.1110 | <i>L. infantum</i> | 51  | 3561 | 3611 |
| LinJ19_V3.1110 | <i>L. infantum</i> | 135 | 3659 | 3793 |
| LinJ19_V3.1110 | <i>L. infantum</i> | 44  | 3814 | 3857 |
| LinJ19_V3.1110 | <i>L. infantum</i> | 60  | 4005 | 4064 |
| LinJ19_V3.1110 | <i>L. infantum</i> | 56  | 4074 | 4129 |
| LinJ19_V3.1110 | <i>L. infantum</i> | 199 | 4275 | 4473 |
| LinJ19_V3.1110 | <i>L. infantum</i> | 130 | 4486 | 4615 |
| LinJ19_V3.1110 | <i>L. infantum</i> | 74  | 4735 | 4808 |
| LinJ19_V3.1110 | <i>L. infantum</i> | 113 | 4937 | 5049 |
| LinJ19_V3.1110 | <i>L. infantum</i> | 43  | 5153 | 5195 |
| LinJ19_V3.1110 | <i>L. infantum</i> | 104 | 5202 | 5305 |
| LinJ19_V3.1110 | <i>L. infantum</i> | 158 | 5332 | 5489 |
| LinJ19_V3.1110 | <i>L. infantum</i> | 122 | 5569 | 5690 |
| LinJ19_V3.1120 | <i>L. infantum</i> | 189 | 47   | 235  |
| LinJ19_V3.1130 | <i>L. infantum</i> | 248 | 71   | 318  |
| LinJ19_V3.1130 | <i>L. infantum</i> | 52  | 322  | 373  |
| LinJ19_V3.1130 | <i>L. infantum</i> | 97  | 474  | 570  |
| LinJ19_V3.1130 | <i>L. infantum</i> | 42  | 604  | 645  |
| LinJ19_V3.1130 | <i>L. infantum</i> | 66  | 691  | 756  |
| LinJ19_V3.1140 | <i>L. infantum</i> | 691 | 82   | 772  |
| LinJ19_V3.1140 | <i>L. infantum</i> | 125 | 777  | 901  |
| LinJ19_V3.1140 | <i>L. infantum</i> | 645 | 995  | 1639 |
| LinJ19_V3.1140 | <i>L. infantum</i> | 744 | 1648 | 2391 |
| LinJ19_V3.1140 | <i>L. infantum</i> | 148 | 2397 | 2544 |
| LinJ19_V3.1140 | <i>L. infantum</i> | 81  | 2598 | 2678 |

|                |                    |     |      |      |
|----------------|--------------------|-----|------|------|
| LinJ19_V3.1150 | <i>L. infantum</i> | 103 | 56   | 158  |
| LinJ19_V3.1150 | <i>L. infantum</i> | 71  | 301  | 371  |
| LinJ19_V3.1160 | <i>L. infantum</i> | 611 | 1    | 611  |
| LinJ19_V3.1160 | <i>L. infantum</i> | 271 | 618  | 888  |
| LinJ19_V3.1160 | <i>L. infantum</i> | 68  | 923  | 990  |
| LinJ19_V3.1170 | <i>L. infantum</i> | 133 | 1    | 133  |
| LinJ19_V3.1170 | <i>L. infantum</i> | 527 | 143  | 669  |
| LinJ19_V3.1170 | <i>L. infantum</i> | 125 | 736  | 860  |
| LinJ19_V3.1170 | <i>L. infantum</i> | 47  | 976  | 1022 |
| LinJ19_V3.1170 | <i>L. infantum</i> | 203 | 1025 | 1227 |
| LinJ19_V3.1170 | <i>L. infantum</i> | 141 | 1250 | 1390 |
| LinJ19_V3.1170 | <i>L. infantum</i> | 330 | 1407 | 1736 |
| LinJ19_V3.1200 | <i>L. infantum</i> | 48  | 1    | 48   |
| LinJ19_V3.1210 | <i>L. infantum</i> | 95  | 138  | 232  |
| LinJ19_V3.1220 | <i>L. infantum</i> | 54  | 57   | 110  |
| LinJ19_V3.1220 | <i>L. infantum</i> | 164 | 159  | 322  |
| LinJ19_V3.1230 | <i>L. infantum</i> | 137 | 111  | 247  |
| LinJ19_V3.1230 | <i>L. infantum</i> | 56  | 353  | 408  |
| LinJ19_V3.1230 | <i>L. infantum</i> | 64  | 622  | 685  |
| LinJ19_V3.1230 | <i>L. infantum</i> | 69  | 874  | 942  |
| LinJ19_V3.1230 | <i>L. infantum</i> | 100 | 1161 | 1260 |
| LinJ19_V3.1230 | <i>L. infantum</i> | 202 | 1326 | 1527 |
| LinJ19_V3.1230 | <i>L. infantum</i> | 88  | 1653 | 1740 |
| LinJ19_V3.1240 | <i>L. infantum</i> | 55  | 87   | 141  |
| LinJ19_V3.1240 | <i>L. infantum</i> | 47  | 156  | 202  |
| LinJ19_V3.1240 | <i>L. infantum</i> | 40  | 368  | 407  |
| LinJ19_V3.1250 | <i>L. infantum</i> | 65  | 47   | 111  |
| LinJ19_V3.1260 | <i>L. infantum</i> | 106 | 122  | 227  |
| LinJ19_V3.1290 | <i>L. infantum</i> | 40  | 104  | 143  |
| LinJ19_V3.1290 | <i>L. infantum</i> | 41  | 159  | 199  |
| LinJ19_V3.1290 | <i>L. infantum</i> | 41  | 159  | 199  |
| LinJ19_V3.1300 | <i>L. infantum</i> | 241 | 31   | 271  |
| LinJ19_V3.1300 | <i>L. infantum</i> | 279 | 293  | 571  |
| LinJ19_V3.1300 | <i>L. infantum</i> | 180 | 589  | 768  |
| LinJ19_V3.1300 | <i>L. infantum</i> | 75  | 874  | 948  |
| LinJ19_V3.1320 | <i>L. infantum</i> | 113 | 1    | 113  |
| LinJ19_V3.1320 | <i>L. infantum</i> | 40  | 686  | 725  |
| LinJ19_V3.1320 | <i>L. infantum</i> | 40  | 686  | 725  |
| LinJ19_V3.1330 | <i>L. infantum</i> | 59  | 75   | 133  |
| LinJ19_V3.1340 | <i>L. infantum</i> | 59  | 75   | 133  |
| LinJ19_V3.1350 | <i>L. infantum</i> | 52  | 1    | 52   |
| LinJ19_V3.1350 | <i>L. infantum</i> | 59  | 168  | 226  |
| LinJ19_V3.1350 | <i>L. infantum</i> | 59  | 168  | 226  |
| LinJ19_V3.1360 | <i>L. infantum</i> | 52  | 1    | 52   |
| LinJ19_V3.1360 | <i>L. infantum</i> | 59  | 168  | 226  |
| LinJ19_V3.1360 | <i>L. infantum</i> | 59  | 168  | 226  |
| LinJ19_V3.1370 | <i>L. infantum</i> | 48  | 145  | 192  |

|                |                    |      |      |      |
|----------------|--------------------|------|------|------|
| LinJ19_V3.1370 | <i>L. infantum</i> | 56   | 446  | 501  |
| LinJ19_V3.1370 | <i>L. infantum</i> | 56   | 446  | 501  |
| LinJ19_V3.1380 | <i>L. infantum</i> | 71   | 323  | 393  |
| LinJ19_V3.1400 | <i>L. infantum</i> | 52   | 23   | 74   |
| LinJ19_V3.1400 | <i>L. infantum</i> | 43   | 122  | 164  |
| LinJ19_V3.1400 | <i>L. infantum</i> | 43   | 122  | 164  |
| LinJ19_V3.1410 | <i>L. infantum</i> | 284  | 101  | 384  |
| LinJ19_V3.1410 | <i>L. infantum</i> | 70   | 631  | 700  |
| LinJ19_V3.1420 | <i>L. infantum</i> | 42   | 1    | 42   |
| LinJ19_V3.1420 | <i>L. infantum</i> | 46   | 172  | 217  |
| LinJ19_V3.1420 | <i>L. infantum</i> | 64   | 460  | 523  |
| LinJ19_V3.1420 | <i>L. infantum</i> | 62   | 552  | 613  |
| LinJ19_V3.1450 | <i>L. infantum</i> | 70   | 164  | 233  |
| LinJ19_V3.1450 | <i>L. infantum</i> | 74   | 704  | 777  |
| LinJ19_V3.1450 | <i>L. infantum</i> | 74   | 704  | 777  |
| LinJ19_V3.1470 | <i>L. infantum</i> | 76   | 211  | 286  |
| LinJ19_V3.1490 | <i>L. infantum</i> | 62   | 205  | 266  |
| LinJ19_V3.1490 | <i>L. infantum</i> | 46   | 324  | 369  |
| LinJ19_V3.1490 | <i>L. infantum</i> | 46   | 324  | 369  |
| LinJ19_V3.1510 | <i>L. infantum</i> | 42   | 1    | 42   |
| LinJ19_V3.1510 | <i>L. infantum</i> | 46   | 344  | 389  |
| LinJ19_V3.1510 | <i>L. infantum</i> | 46   | 344  | 389  |
| LinJ19_V3.1520 | <i>L. infantum</i> | 53   | 191  | 243  |
| LinJ19_V3.1550 | <i>L. infantum</i> | 154  | 1    | 154  |
| LinJ19_V3.1550 | <i>L. infantum</i> | 93   | 175  | 267  |
| LinJ19_V3.1550 | <i>L. infantum</i> | 45   | 384  | 428  |
| LinJ19_V3.1550 | <i>L. infantum</i> | 44   | 578  | 621  |
| LinJ19_V3.1550 | <i>L. infantum</i> | 109  | 677  | 785  |
| LinJ19_V3.1610 | <i>L. infantum</i> | 65   | 174  | 238  |
| LinJ19_V3.1610 | <i>L. infantum</i> | 40   | 250  | 289  |
| LinJ19_V3.1610 | <i>L. infantum</i> | 40   | 250  | 289  |
| LinJ19_V3.1620 | <i>L. infantum</i> | 41   | 73   | 113  |
| LinJ19_V3.1620 | <i>L. infantum</i> | 55   | 477  | 531  |
| LinJ19_V3.1620 | <i>L. infantum</i> | 49   | 550  | 598  |
| LinJ19_V3.1630 | <i>L. infantum</i> | 49   | 1    | 49   |
| LinJ19_V3.1650 | <i>L. infantum</i> | 48   | 261  | 308  |
| LinJ19_V3.1670 | <i>L. infantum</i> | 91   | 439  | 529  |
| LinJ19_V3.1680 | <i>L. infantum</i> | 1360 | 136  | 1495 |
| LinJ19_V3.1680 | <i>L. infantum</i> | 147  | 1527 | 1673 |
| LinJ19_V3.1680 | <i>L. infantum</i> | 40   | 1700 | 1739 |
| LinJ19_V3.1690 | <i>L. infantum</i> | 1415 | 139  | 1553 |
| LinJ20_V3.0020 | <i>L. infantum</i> | 59   | 354  | 412  |
| LinJ20_V3.0030 | <i>L. infantum</i> | 50   | 1    | 50   |
| LinJ20_V3.0040 | <i>L. infantum</i> | 85   | 265  | 349  |
| LinJ20_V3.0050 | <i>L. infantum</i> | 53   | 51   | 103  |
| LinJ20_V3.0050 | <i>L. infantum</i> | 47   | 114  | 160  |
| LinJ20_V3.0050 | <i>L. infantum</i> | 47   | 114  | 160  |

|                |                    |     |      |      |
|----------------|--------------------|-----|------|------|
| LinJ20_V3.0070 | <i>L. infantum</i> | 263 | 23   | 285  |
| LinJ20_V3.0070 | <i>L. infantum</i> | 56  | 570  | 625  |
| LinJ20_V3.0080 | <i>L. infantum</i> | 40  | 1    | 40   |
| LinJ20_V3.0100 | <i>L. infantum</i> | 61  | 39   | 99   |
| LinJ20_V3.0140 | <i>L. infantum</i> | 157 | 288  | 444  |
| LinJ20_V3.0150 | <i>L. infantum</i> | 138 | 1    | 138  |
| LinJ20_V3.0150 | <i>L. infantum</i> | 73  | 635  | 707  |
| LinJ20_V3.0170 | <i>L. infantum</i> | 40  | 712  | 751  |
| LinJ20_V3.0180 | <i>L. infantum</i> | 129 | 539  | 667  |
| LinJ20_V3.0200 | <i>L. infantum</i> | 75  | 53   | 127  |
| LinJ20_V3.0200 | <i>L. infantum</i> | 49  | 171  | 219  |
| LinJ20_V3.0200 | <i>L. infantum</i> | 191 | 273  | 463  |
| LinJ20_V3.0210 | <i>L. infantum</i> | 40  | 32   | 71   |
| LinJ20_V3.0210 | <i>L. infantum</i> | 61  | 98   | 158  |
| LinJ20_V3.0210 | <i>L. infantum</i> | 61  | 98   | 158  |
| LinJ20_V3.0220 | <i>L. infantum</i> | 69  | 1    | 69   |
| LinJ20_V3.0220 | <i>L. infantum</i> | 76  | 243  | 318  |
| LinJ20_V3.0220 | <i>L. infantum</i> | 76  | 243  | 318  |
| LinJ20_V3.0240 | <i>L. infantum</i> | 44  | 373  | 416  |
| LinJ20_V3.0250 | <i>L. infantum</i> | 66  | 1    | 66   |
| LinJ20_V3.0270 | <i>L. infantum</i> | 73  | 1    | 73   |
| LinJ20_V3.0280 | <i>L. infantum</i> | 42  | 1418 | 1459 |
| LinJ20_V3.0280 | <i>L. infantum</i> | 42  | 1880 | 1921 |
| LinJ20_V3.0280 | <i>L. infantum</i> | 99  | 2012 | 2110 |
| LinJ20_V3.0280 | <i>L. infantum</i> | 44  | 2923 | 2966 |
| LinJ20_V3.0280 | <i>L. infantum</i> | 53  | 3380 | 3432 |
| LinJ20_V3.0280 | <i>L. infantum</i> | 54  | 3440 | 3493 |
| LinJ20_V3.0280 | <i>L. infantum</i> | 92  | 3748 | 3839 |
| LinJ20_V3.0280 | <i>L. infantum</i> | 547 | 3948 | 4494 |
| LinJ20_V3.0280 | <i>L. infantum</i> | 45  | 4716 | 4760 |
| LinJ20_V3.0290 | <i>L. infantum</i> | 60  | 94   | 153  |
| LinJ20_V3.0290 | <i>L. infantum</i> | 42  | 221  | 262  |
| LinJ20_V3.0290 | <i>L. infantum</i> | 42  | 221  | 262  |
| LinJ20_V3.0300 | <i>L. infantum</i> | 67  | 1    | 67   |
| LinJ20_V3.0300 | <i>L. infantum</i> | 98  | 107  | 204  |
| LinJ20_V3.0300 | <i>L. infantum</i> | 63  | 211  | 273  |
| LinJ20_V3.0310 | <i>L. infantum</i> | 52  | 1    | 52   |
| LinJ20_V3.0320 | <i>L. infantum</i> | 40  | 164  | 203  |
| LinJ20_V3.0320 | <i>L. infantum</i> | 69  | 408  | 476  |
| LinJ20_V3.0320 | <i>L. infantum</i> | 57  | 718  | 774  |
| LinJ20_V3.0350 | <i>L. infantum</i> | 97  | 65   | 161  |
| LinJ20_V3.0350 | <i>L. infantum</i> | 183 | 302  | 484  |
| LinJ20_V3.0360 | <i>L. infantum</i> | 74  | 29   | 102  |
| LinJ20_V3.0360 | <i>L. infantum</i> | 91  | 104  | 194  |
| LinJ20_V3.0370 | <i>L. infantum</i> | 75  | 169  | 243  |
| LinJ20_V3.0370 | <i>L. infantum</i> | 84  | 306  | 389  |
| LinJ20_V3.0370 | <i>L. infantum</i> | 84  | 306  | 389  |



|                |                    |     |      |      |
|----------------|--------------------|-----|------|------|
| LinJ20_V3.0380 | <i>L. infantum</i> | 57  | 71   | 127  |
| LinJ20_V3.0400 | <i>L. infantum</i> | 108 | 212  | 319  |
| LinJ20_V3.0400 | <i>L. infantum</i> | 130 | 603  | 732  |
| LinJ20_V3.0410 | <i>L. infantum</i> | 273 | 37   | 309  |
| LinJ20_V3.0410 | <i>L. infantum</i> | 137 | 328  | 464  |
| LinJ20_V3.0410 | <i>L. infantum</i> | 137 | 328  | 464  |
| LinJ20_V3.0430 | <i>L. infantum</i> | 53  | 296  | 348  |
| LinJ20_V3.0430 | <i>L. infantum</i> | 45  | 433  | 477  |
| LinJ20_V3.0430 | <i>L. infantum</i> | 45  | 433  | 477  |
| LinJ20_V3.0440 | <i>L. infantum</i> | 68  | 319  | 386  |
| LinJ20_V3.0440 | <i>L. infantum</i> | 73  | 459  | 531  |
| LinJ20_V3.0440 | <i>L. infantum</i> | 151 | 581  | 731  |
| LinJ20_V3.0440 | <i>L. infantum</i> | 57  | 1342 | 1398 |
| LinJ20_V3.0450 | <i>L. infantum</i> | 47  | 220  | 266  |
| LinJ20_V3.0450 | <i>L. infantum</i> | 63  | 274  | 336  |
| LinJ20_V3.0450 | <i>L. infantum</i> | 63  | 274  | 336  |
| LinJ20_V3.0470 | <i>L. infantum</i> | 55  | 160  | 214  |
| LinJ20_V3.0470 | <i>L. infantum</i> | 51  | 298  | 348  |
| LinJ20_V3.0470 | <i>L. infantum</i> | 60  | 416  | 475  |
| LinJ20_V3.0470 | <i>L. infantum</i> | 84  | 485  | 568  |
| LinJ20_V3.0480 | <i>L. infantum</i> | 472 | 47   | 518  |
| LinJ20_V3.0480 | <i>L. infantum</i> | 806 | 538  | 1343 |
| LinJ20_V3.0490 | <i>L. infantum</i> | 142 | 1    | 142  |
| LinJ20_V3.0500 | <i>L. infantum</i> | 42  | 183  | 224  |
| LinJ20_V3.0500 | <i>L. infantum</i> | 92  | 326  | 417  |
| LinJ20_V3.0500 | <i>L. infantum</i> | 92  | 326  | 417  |
| LinJ20_V3.0510 | <i>L. infantum</i> | 50  | 168  | 217  |
| LinJ20_V3.0540 | <i>L. infantum</i> | 56  | 103  | 158  |
| LinJ20_V3.0540 | <i>L. infantum</i> | 116 | 387  | 502  |
| LinJ20_V3.0550 | <i>L. infantum</i> | 70  | 1    | 70   |
| LinJ20_V3.0560 | <i>L. infantum</i> | 76  | 1    | 76   |
| LinJ20_V3.0570 | <i>L. infantum</i> | 68  | 69   | 136  |
| LinJ20_V3.0570 | <i>L. infantum</i> | 74  | 210  | 283  |
| LinJ20_V3.0570 | <i>L. infantum</i> | 74  | 210  | 283  |
| LinJ20_V3.0580 | <i>L. infantum</i> | 52  | 14   | 65   |
| LinJ20_V3.0580 | <i>L. infantum</i> | 62  | 329  | 390  |
| LinJ20_V3.0580 | <i>L. infantum</i> | 62  | 329  | 390  |
| LinJ20_V3.0590 | <i>L. infantum</i> | 359 | 117  | 475  |
| LinJ20_V3.0590 | <i>L. infantum</i> | 86  | 502  | 587  |
| LinJ20_V3.0590 | <i>L. infantum</i> | 57  | 702  | 758  |
| LinJ20_V3.0610 | <i>L. infantum</i> | 44  | 1    | 44   |
| LinJ20_V3.0610 | <i>L. infantum</i> | 122 | 111  | 232  |
| LinJ20_V3.0610 | <i>L. infantum</i> | 122 | 111  | 232  |
| LinJ20_V3.0620 | <i>L. infantum</i> | 43  | 71   | 113  |
| LinJ20_V3.0620 | <i>L. infantum</i> | 66  | 167  | 232  |
| LinJ20_V3.0620 | <i>L. infantum</i> | 43  | 486  | 528  |
| LinJ20_V3.0640 | <i>L. infantum</i> | 85  | 104  | 188  |

|                |                    |     |      |      |
|----------------|--------------------|-----|------|------|
| LinJ20_V3.0640 | <i>L. infantum</i> | 44  | 293  | 336  |
| LinJ20_V3.0640 | <i>L. infantum</i> | 273 | 456  | 728  |
| LinJ20_V3.0640 | <i>L. infantum</i> | 71  | 762  | 832  |
| LinJ20_V3.0650 | <i>L. infantum</i> | 146 | 1    | 146  |
| LinJ20_V3.0650 | <i>L. infantum</i> | 120 | 312  | 431  |
| LinJ20_V3.0660 | <i>L. infantum</i> | 67  | 63   | 129  |
| LinJ20_V3.0660 | <i>L. infantum</i> | 211 | 179  | 389  |
| LinJ20_V3.0660 | <i>L. infantum</i> | 71  | 507  | 577  |
| LinJ20_V3.0680 | <i>L. infantum</i> | 91  | 69   | 159  |
| LinJ20_V3.0680 | <i>L. infantum</i> | 61  | 228  | 288  |
| LinJ20_V3.0680 | <i>L. infantum</i> | 194 | 316  | 509  |
| LinJ20_V3.0680 | <i>L. infantum</i> | 448 | 540  | 987  |
| LinJ20_V3.0680 | <i>L. infantum</i> | 212 | 1011 | 1222 |
| LinJ20_V3.0680 | <i>L. infantum</i> | 103 | 1388 | 1490 |
| LinJ20_V3.0690 | <i>L. infantum</i> | 314 | 1    | 314  |
| LinJ20_V3.0690 | <i>L. infantum</i> | 153 | 320  | 472  |
| LinJ20_V3.0690 | <i>L. infantum</i> | 703 | 517  | 1219 |
| LinJ20_V3.0700 | <i>L. infantum</i> | 160 | 1    | 160  |
| LinJ20_V3.0700 | <i>L. infantum</i> | 60  | 182  | 241  |
| LinJ20_V3.0700 | <i>L. infantum</i> | 86  | 524  | 609  |
| LinJ20_V3.0700 | <i>L. infantum</i> | 343 | 709  | 1051 |
| LinJ20_V3.0710 | <i>L. infantum</i> | 65  | 143  | 207  |
| LinJ20_V3.0710 | <i>L. infantum</i> | 63  | 389  | 451  |
| LinJ20_V3.0720 | <i>L. infantum</i> | 45  | 106  | 150  |
| LinJ20_V3.0720 | <i>L. infantum</i> | 40  | 560  | 599  |
| LinJ20_V3.0720 | <i>L. infantum</i> | 40  | 560  | 599  |
| LinJ20_V3.0730 | <i>L. infantum</i> | 41  | 143  | 183  |
| LinJ20_V3.0750 | <i>L. infantum</i> | 61  | 69   | 129  |
| LinJ20_V3.0750 | <i>L. infantum</i> | 146 | 160  | 305  |
| LinJ20_V3.0750 | <i>L. infantum</i> | 177 | 438  | 614  |
| LinJ20_V3.0750 | <i>L. infantum</i> | 174 | 666  | 839  |
| LinJ20_V3.0750 | <i>L. infantum</i> | 498 | 841  | 1338 |
| LinJ20_V3.0760 | <i>L. infantum</i> | 184 | 117  | 300  |
| LinJ20_V3.0760 | <i>L. infantum</i> | 448 | 621  | 1068 |
| LinJ20_V3.0770 | <i>L. infantum</i> | 160 | 53   | 212  |
| LinJ20_V3.0770 | <i>L. infantum</i> | 139 | 440  | 578  |
| LinJ20_V3.0770 | <i>L. infantum</i> | 58  | 641  | 698  |
| LinJ20_V3.0770 | <i>L. infantum</i> | 477 | 826  | 1302 |
| LinJ20_V3.0770 | <i>L. infantum</i> | 316 | 1308 | 1623 |
| LinJ20_V3.0780 | <i>L. infantum</i> | 239 | 1    | 239  |
| LinJ20_V3.0780 | <i>L. infantum</i> | 485 | 282  | 766  |
| LinJ20_V3.0780 | <i>L. infantum</i> | 150 | 791  | 940  |
| LinJ20_V3.0780 | <i>L. infantum</i> | 41  | 965  | 1005 |
| LinJ20_V3.0780 | <i>L. infantum</i> | 48  | 1010 | 1057 |
| LinJ20_V3.0780 | <i>L. infantum</i> | 627 | 1076 | 1702 |
| LinJ20_V3.0780 | <i>L. infantum</i> | 64  | 1720 | 1783 |
| LinJ20_V3.0780 | <i>L. infantum</i> | 112 | 1797 | 1908 |

|                |                    |     |      |      |
|----------------|--------------------|-----|------|------|
| LinJ20_V3.0780 | <i>L. infantum</i> | 253 | 2124 | 2376 |
| LinJ20_V3.0780 | <i>L. infantum</i> | 274 | 2475 | 2748 |
| LinJ20_V3.0780 | <i>L. infantum</i> | 277 | 3044 | 3320 |
| LinJ20_V3.0780 | <i>L. infantum</i> | 125 | 3832 | 3956 |
| LinJ20_V3.0790 | <i>L. infantum</i> | 123 | 82   | 204  |
| LinJ20_V3.0790 | <i>L. infantum</i> | 69  | 455  | 523  |
| LinJ20_V3.0800 | <i>L. infantum</i> | 46  | 75   | 120  |
| LinJ20_V3.0800 | <i>L. infantum</i> | 46  | 304  | 349  |
| LinJ20_V3.0800 | <i>L. infantum</i> | 44  | 516  | 559  |
| LinJ20_V3.0800 | <i>L. infantum</i> | 56  | 670  | 725  |
| LinJ20_V3.0810 | <i>L. infantum</i> | 299 | 1    | 299  |
| LinJ20_V3.0810 | <i>L. infantum</i> | 56  | 303  | 358  |
| LinJ20_V3.0820 | <i>L. infantum</i> | 53  | 686  | 738  |
| LinJ20_V3.0830 | <i>L. infantum</i> | 85  | 1    | 85   |
| LinJ20_V3.0840 | <i>L. infantum</i> | 47  | 13   | 59   |
| LinJ20_V3.0860 | <i>L. infantum</i> | 51  | 161  | 211  |
| LinJ20_V3.0860 | <i>L. infantum</i> | 94  | 607  | 700  |
| LinJ20_V3.0860 | <i>L. infantum</i> | 64  | 749  | 812  |
| LinJ20_V3.0860 | <i>L. infantum</i> | 66  | 968  | 1033 |
| LinJ20_V3.0860 | <i>L. infantum</i> | 56  | 1165 | 1220 |
| LinJ20_V3.0860 | <i>L. infantum</i> | 126 | 1336 | 1461 |
| LinJ20_V3.0860 | <i>L. infantum</i> | 82  | 1493 | 1574 |
| LinJ20_V3.0870 | <i>L. infantum</i> | 55  | 179  | 233  |
| LinJ20_V3.0880 | <i>L. infantum</i> | 72  | 129  | 200  |
| LinJ20_V3.0880 | <i>L. infantum</i> | 58  | 263  | 320  |
| LinJ20_V3.0880 | <i>L. infantum</i> | 67  | 602  | 668  |
| LinJ20_V3.0880 | <i>L. infantum</i> | 88  | 681  | 768  |
| LinJ20_V3.0890 | <i>L. infantum</i> | 73  | 91   | 163  |
| LinJ20_V3.0900 | <i>L. infantum</i> | 53  | 1    | 53   |
| LinJ20_V3.0900 | <i>L. infantum</i> | 123 | 134  | 256  |
| LinJ20_V3.0910 | <i>L. infantum</i> | 134 | 1    | 134  |
| LinJ20_V3.0910 | <i>L. infantum</i> | 159 | 421  | 579  |
| LinJ20_V3.0910 | <i>L. infantum</i> | 71  | 708  | 778  |
| LinJ20_V3.0910 | <i>L. infantum</i> | 82  | 809  | 890  |
| LinJ20_V3.0920 | <i>L. infantum</i> | 190 | 95   | 284  |
| LinJ20_V3.0930 | <i>L. infantum</i> | 50  | 1    | 50   |
| LinJ20_V3.0930 | <i>L. infantum</i> | 172 | 60   | 231  |
| LinJ20_V3.0930 | <i>L. infantum</i> | 157 | 235  | 391  |
| LinJ20_V3.0930 | <i>L. infantum</i> | 87  | 437  | 523  |
| LinJ20_V3.0930 | <i>L. infantum</i> | 42  | 632  | 673  |
| LinJ20_V3.0940 | <i>L. infantum</i> | 41  | 205  | 245  |
| LinJ20_V3.0940 | <i>L. infantum</i> | 62  | 469  | 530  |
| LinJ20_V3.0940 | <i>L. infantum</i> | 45  | 666  | 710  |
| LinJ20_V3.0940 | <i>L. infantum</i> | 46  | 1520 | 1565 |
| LinJ20_V3.0940 | <i>L. infantum</i> | 60  | 1685 | 1744 |
| LinJ20_V3.0940 | <i>L. infantum</i> | 51  | 1761 | 1811 |
| LinJ20_V3.0940 | <i>L. infantum</i> | 123 | 1965 | 2087 |

|                |                    |     |      |      |
|----------------|--------------------|-----|------|------|
| LinJ20_V3.0950 | <i>L. infantum</i> | 103 | 250  | 352  |
| LinJ20_V3.0950 | <i>L. infantum</i> | 70  | 392  | 461  |
| LinJ20_V3.0960 | <i>L. infantum</i> | 82  | 266  | 347  |
| LinJ20_V3.0960 | <i>L. infantum</i> | 255 | 445  | 699  |
| LinJ20_V3.0970 | <i>L. infantum</i> | 178 | 20   | 197  |
| LinJ20_V3.0970 | <i>L. infantum</i> | 87  | 236  | 322  |
| LinJ20_V3.0970 | <i>L. infantum</i> | 322 | 347  | 668  |
| LinJ20_V3.0970 | <i>L. infantum</i> | 323 | 680  | 1002 |
| LinJ20_V3.0970 | <i>L. infantum</i> | 92  | 1099 | 1190 |
| LinJ20_V3.0970 | <i>L. infantum</i> | 400 | 1214 | 1613 |
| LinJ20_V3.0970 | <i>L. infantum</i> | 261 | 1700 | 1960 |
| LinJ20_V3.0970 | <i>L. infantum</i> | 305 | 1992 | 2296 |
| LinJ20_V3.0970 | <i>L. infantum</i> | 97  | 2305 | 2401 |
| LinJ20_V3.0970 | <i>L. infantum</i> | 99  | 2431 | 2529 |
| LinJ20_V3.0970 | <i>L. infantum</i> | 52  | 2788 | 2839 |
| LinJ20_V3.0970 | <i>L. infantum</i> | 79  | 3007 | 3085 |
| LinJ20_V3.0970 | <i>L. infantum</i> | 53  | 3163 | 3215 |
| LinJ20_V3.0970 | <i>L. infantum</i> | 48  | 3228 | 3275 |
| LinJ20_V3.0990 | <i>L. infantum</i> | 62  | 1    | 62   |
| LinJ20_V3.0990 | <i>L. infantum</i> | 207 | 486  | 692  |
| LinJ20_V3.0990 | <i>L. infantum</i> | 207 | 486  | 692  |
| LinJ20_V3.1000 | <i>L. infantum</i> | 85  | 15   | 99   |
| LinJ20_V3.1000 | <i>L. infantum</i> | 42  | 173  | 214  |
| LinJ20_V3.1000 | <i>L. infantum</i> | 68  | 376  | 443  |
| LinJ20_V3.1000 | <i>L. infantum</i> | 49  | 460  | 508  |
| LinJ20_V3.1010 | <i>L. infantum</i> | 602 | 117  | 718  |
| LinJ20_V3.1030 | <i>L. infantum</i> | 428 | 56   | 483  |
| LinJ20_V3.1030 | <i>L. infantum</i> | 53  | 519  | 571  |
| LinJ20_V3.1030 | <i>L. infantum</i> | 144 | 593  | 736  |
| LinJ20_V3.1030 | <i>L. infantum</i> | 136 | 764  | 899  |
| LinJ20_V3.1040 | <i>L. infantum</i> | 265 | 6    | 270  |
| LinJ20_V3.1040 | <i>L. infantum</i> | 55  | 282  | 336  |
| LinJ20_V3.1050 | <i>L. infantum</i> | 425 | 30   | 454  |
| LinJ20_V3.1050 | <i>L. infantum</i> | 220 | 466  | 685  |
| LinJ20_V3.1050 | <i>L. infantum</i> | 41  | 710  | 750  |
| LinJ20_V3.1050 | <i>L. infantum</i> | 138 | 758  | 895  |
| LinJ20_V3.1060 | <i>L. infantum</i> | 162 | 1    | 162  |
| LinJ20_V3.1060 | <i>L. infantum</i> | 158 | 168  | 325  |
| LinJ20_V3.1060 | <i>L. infantum</i> | 66  | 345  | 410  |
| LinJ20_V3.1060 | <i>L. infantum</i> | 339 | 417  | 755  |
| LinJ20_V3.1060 | <i>L. infantum</i> | 166 | 781  | 946  |
| LinJ20_V3.1080 | <i>L. infantum</i> | 127 | 1    | 127  |
| LinJ20_V3.1080 | <i>L. infantum</i> | 341 | 145  | 485  |
| LinJ20_V3.1080 | <i>L. infantum</i> | 798 | 546  | 1343 |
| LinJ20_V3.1090 | <i>L. infantum</i> | 275 | 1    | 275  |
| LinJ20_V3.1100 | <i>L. infantum</i> | 52  | 76   | 127  |
| LinJ20_V3.1100 | <i>L. infantum</i> | 69  | 210  | 278  |

|                |                    |      |      |      |
|----------------|--------------------|------|------|------|
| LinJ20_V3.1100 | <i>L. infantum</i> | 53   | 453  | 505  |
| LinJ20_V3.1100 | <i>L. infantum</i> | 48   | 652  | 699  |
| LinJ20_V3.1100 | <i>L. infantum</i> | 431  | 780  | 1210 |
| LinJ20_V3.1100 | <i>L. infantum</i> | 123  | 1229 | 1351 |
| LinJ20_V3.1100 | <i>L. infantum</i> | 151  | 1412 | 1562 |
| LinJ20_V3.1100 | <i>L. infantum</i> | 51   | 1577 | 1627 |
| LinJ20_V3.1100 | <i>L. infantum</i> | 120  | 1722 | 1841 |
| LinJ20_V3.1100 | <i>L. infantum</i> | 160  | 1862 | 2021 |
| LinJ20_V3.1100 | <i>L. infantum</i> | 265  | 2147 | 2411 |
| LinJ20_V3.1110 | <i>L. infantum</i> | 302  | 44   | 345  |
| LinJ20_V3.1110 | <i>L. infantum</i> | 59   | 405  | 463  |
| LinJ20_V3.1110 | <i>L. infantum</i> | 220  | 496  | 715  |
| LinJ20_V3.1110 | <i>L. infantum</i> | 187  | 800  | 986  |
| LinJ20_V3.1110 | <i>L. infantum</i> | 134  | 1033 | 1166 |
| LinJ20_V3.1110 | <i>L. infantum</i> | 112  | 1267 | 1378 |
| LinJ20_V3.1110 | <i>L. infantum</i> | 51   | 1534 | 1584 |
| LinJ20_V3.1110 | <i>L. infantum</i> | 159  | 1655 | 1813 |
| LinJ20_V3.1120 | <i>L. infantum</i> | 112  | 32   | 143  |
| LinJ20_V3.1120 | <i>L. infantum</i> | 41   | 156  | 196  |
| LinJ20_V3.1120 | <i>L. infantum</i> | 78   | 236  | 313  |
| LinJ20_V3.1120 | <i>L. infantum</i> | 65   | 347  | 411  |
| LinJ20_V3.1120 | <i>L. infantum</i> | 67   | 488  | 554  |
| LinJ20_V3.1120 | <i>L. infantum</i> | 86   | 764  | 849  |
| LinJ20_V3.1120 | <i>L. infantum</i> | 50   | 960  | 1009 |
| LinJ20_V3.1120 | <i>L. infantum</i> | 84   | 1019 | 1102 |
| LinJ20_V3.1120 | <i>L. infantum</i> | 62   | 1245 | 1306 |
| LinJ20_V3.1120 | <i>L. infantum</i> | 172  | 1457 | 1628 |
| LinJ20_V3.1120 | <i>L. infantum</i> | 208  | 1689 | 1896 |
| LinJ20_V3.1130 | <i>L. infantum</i> | 122  | 1    | 122  |
| LinJ20_V3.1130 | <i>L. infantum</i> | 1050 | 135  | 1184 |
| LinJ20_V3.1140 | <i>L. infantum</i> | 172  | 1    | 172  |
| LinJ20_V3.1140 | <i>L. infantum</i> | 40   | 318  | 357  |
| LinJ20_V3.1140 | <i>L. infantum</i> | 118  | 611  | 728  |
| LinJ20_V3.1140 | <i>L. infantum</i> | 205  | 790  | 994  |
| LinJ20_V3.1140 | <i>L. infantum</i> | 121  | 1595 | 1715 |
| LinJ20_V3.1140 | <i>L. infantum</i> | 193  | 1866 | 2058 |
| LinJ20_V3.1140 | <i>L. infantum</i> | 48   | 2081 | 2128 |
| LinJ20_V3.1140 | <i>L. infantum</i> | 44   | 2444 | 2487 |
| LinJ20_V3.1150 | <i>L. infantum</i> | 61   | 68   | 128  |
| LinJ20_V3.1150 | <i>L. infantum</i> | 105  | 283  | 387  |
| LinJ20_V3.1150 | <i>L. infantum</i> | 50   | 481  | 530  |
| LinJ20_V3.1150 | <i>L. infantum</i> | 87   | 567  | 653  |
| LinJ20_V3.1160 | <i>L. infantum</i> | 55   | 98   | 152  |
| LinJ20_V3.1170 | <i>L. infantum</i> | 69   | 130  | 198  |
| LinJ20_V3.1170 | <i>L. infantum</i> | 51   | 219  | 269  |
| LinJ20_V3.1170 | <i>L. infantum</i> | 51   | 219  | 269  |
| LinJ20_V3.1190 | <i>L. infantum</i> | 44   | 1    | 44   |

|                |                    |     |      |      |
|----------------|--------------------|-----|------|------|
| LinJ20_V3.1200 | <i>L. infantum</i> | 53  | 1    | 53   |
| LinJ20_V3.1200 | <i>L. infantum</i> | 430 | 193  | 622  |
| LinJ20_V3.1210 | <i>L. infantum</i> | 324 | 1    | 324  |
| LinJ20_V3.1220 | <i>L. infantum</i> | 131 | 1    | 131  |
| LinJ20_V3.1240 | <i>L. infantum</i> | 74  | 546  | 619  |
| LinJ20_V3.1280 | <i>L. infantum</i> | 47  | 1    | 47   |
| LinJ20_V3.1280 | <i>L. infantum</i> | 168 | 53   | 220  |
| LinJ20_V3.1280 | <i>L. infantum</i> | 48  | 286  | 333  |
| LinJ20_V3.1280 | <i>L. infantum</i> | 51  | 465  | 515  |
| LinJ20_V3.1280 | <i>L. infantum</i> | 89  | 524  | 612  |
| LinJ20_V3.1280 | <i>L. infantum</i> | 172 | 855  | 1026 |
| LinJ20_V3.1280 | <i>L. infantum</i> | 52  | 1108 | 1159 |
| LinJ20_V3.1280 | <i>L. infantum</i> | 69  | 1318 | 1386 |
| LinJ20_V3.1280 | <i>L. infantum</i> | 57  | 1418 | 1474 |
| LinJ20_V3.1280 | <i>L. infantum</i> | 68  | 1592 | 1659 |
| LinJ20_V3.1280 | <i>L. infantum</i> | 71  | 1759 | 1829 |
| LinJ20_V3.1280 | <i>L. infantum</i> | 54  | 1848 | 1901 |
| LinJ20_V3.1280 | <i>L. infantum</i> | 120 | 1918 | 2037 |
| LinJ20_V3.1280 | <i>L. infantum</i> | 52  | 2157 | 2208 |
| LinJ20_V3.1280 | <i>L. infantum</i> | 41  | 2247 | 2287 |
| LinJ20_V3.1280 | <i>L. infantum</i> | 81  | 2318 | 2398 |
| LinJ20_V3.1280 | <i>L. infantum</i> | 89  | 2633 | 2721 |
| LinJ20_V3.1290 | <i>L. infantum</i> | 122 | 1    | 122  |
| LinJ20_V3.1300 | <i>L. infantum</i> | 106 | 1    | 106  |
| LinJ20_V3.1300 | <i>L. infantum</i> | 174 | 153  | 326  |
| LinJ20_V3.1300 | <i>L. infantum</i> | 44  | 328  | 371  |
| LinJ20_V3.1300 | <i>L. infantum</i> | 77  | 407  | 483  |
| LinJ20_V3.1300 | <i>L. infantum</i> | 274 | 566  | 839  |
| LinJ20_V3.1310 | <i>L. infantum</i> | 50  | 60   | 109  |
| LinJ20_V3.1330 | <i>L. infantum</i> | 115 | 126  | 240  |
| LinJ20_V3.1360 | <i>L. infantum</i> | 179 | 14   | 192  |
| LinJ20_V3.1360 | <i>L. infantum</i> | 46  | 205  | 250  |
| LinJ20_V3.1390 | <i>L. infantum</i> | 40  | 1    | 40   |
| LinJ20_V3.1390 | <i>L. infantum</i> | 74  | 493  | 566  |
| LinJ20_V3.1390 | <i>L. infantum</i> | 74  | 493  | 566  |
| LinJ20_V3.1400 | <i>L. infantum</i> | 84  | 24   | 107  |
| LinJ20_V3.1400 | <i>L. infantum</i> | 47  | 156  | 202  |
| LinJ20_V3.1400 | <i>L. infantum</i> | 47  | 156  | 202  |
| LinJ20_V3.1410 | <i>L. infantum</i> | 113 | 1    | 113  |
| LinJ20_V3.1410 | <i>L. infantum</i> | 109 | 422  | 530  |
| LinJ20_V3.1410 | <i>L. infantum</i> | 52  | 537  | 588  |
| LinJ20_V3.1420 | <i>L. infantum</i> | 114 | 1    | 114  |
| LinJ20_V3.1420 | <i>L. infantum</i> | 82  | 423  | 504  |
| LinJ20_V3.1420 | <i>L. infantum</i> | 82  | 423  | 504  |
| LinJ20_V3.1430 | <i>L. infantum</i> | 104 | 1    | 104  |
| LinJ20_V3.1430 | <i>L. infantum</i> | 125 | 287  | 411  |
| LinJ20_V3.1430 | <i>L. infantum</i> | 213 | 632  | 844  |

|                |                    |     |      |      |
|----------------|--------------------|-----|------|------|
| LinJ20_V3.1430 | <i>L. infantum</i> | 388 | 867  | 1254 |
| LinJ20_V3.1440 | <i>L. infantum</i> | 386 | 1    | 386  |
| LinJ20_V3.1460 | <i>L. infantum</i> | 42  | 1    | 42   |
| LinJ20_V3.1460 | <i>L. infantum</i> | 66  | 61   | 126  |
| LinJ20_V3.1460 | <i>L. infantum</i> | 75  | 135  | 209  |
| LinJ20_V3.1460 | <i>L. infantum</i> | 71  | 445  | 515  |
| LinJ20_V3.1460 | <i>L. infantum</i> | 61  | 689  | 749  |
| LinJ20_V3.1460 | <i>L. infantum</i> | 96  | 760  | 855  |
| LinJ20_V3.1470 | <i>L. infantum</i> | 104 | 102  | 205  |
| LinJ20_V3.1470 | <i>L. infantum</i> | 73  | 251  | 323  |
| LinJ20_V3.1470 | <i>L. infantum</i> | 699 | 447  | 1145 |
| LinJ20_V3.1490 | <i>L. infantum</i> | 97  | 1    | 97   |
| LinJ20_V3.1490 | <i>L. infantum</i> | 43  | 103  | 145  |
| LinJ20_V3.1500 | <i>L. infantum</i> | 173 | 193  | 365  |
| LinJ20_V3.1510 | <i>L. infantum</i> | 89  | 154  | 242  |
| LinJ20_V3.1520 | <i>L. infantum</i> | 55  | 38   | 92   |
| LinJ20_V3.1520 | <i>L. infantum</i> | 69  | 164  | 232  |
| LinJ20_V3.1520 | <i>L. infantum</i> | 56  | 368  | 423  |
| LinJ20_V3.1530 | <i>L. infantum</i> | 66  | 93   | 158  |
| LinJ20_V3.1530 | <i>L. infantum</i> | 145 | 393  | 537  |
| LinJ20_V3.1530 | <i>L. infantum</i> | 40  | 687  | 726  |
| LinJ20_V3.1530 | <i>L. infantum</i> | 245 | 735  | 979  |
| LinJ20_V3.1530 | <i>L. infantum</i> | 54  | 1010 | 1063 |
| LinJ20_V3.1540 | <i>L. infantum</i> | 69  | 769  | 837  |
| LinJ20_V3.1540 | <i>L. infantum</i> | 55  | 857  | 911  |
| LinJ20_V3.1540 | <i>L. infantum</i> | 55  | 857  | 911  |
| LinJ20_V3.1550 | <i>L. infantum</i> | 91  | 332  | 422  |
| LinJ20_V3.1550 | <i>L. infantum</i> | 57  | 482  | 538  |
| LinJ20_V3.1550 | <i>L. infantum</i> | 243 | 710  | 952  |
| LinJ20_V3.1560 | <i>L. infantum</i> | 54  | 1    | 54   |
| LinJ20_V3.1560 | <i>L. infantum</i> | 57  | 351  | 407  |
| LinJ20_V3.1560 | <i>L. infantum</i> | 41  | 793  | 833  |
| LinJ20_V3.1560 | <i>L. infantum</i> | 68  | 1350 | 1417 |
| LinJ20_V3.1560 | <i>L. infantum</i> | 46  | 1733 | 1778 |
| LinJ20_V3.1570 | <i>L. infantum</i> | 125 | 1    | 125  |
| LinJ20_V3.1570 | <i>L. infantum</i> | 67  | 391  | 457  |
| LinJ20_V3.1570 | <i>L. infantum</i> | 59  | 630  | 688  |
| LinJ20_V3.1570 | <i>L. infantum</i> | 55  | 941  | 995  |
| LinJ20_V3.1570 | <i>L. infantum</i> | 46  | 1049 | 1094 |
| LinJ20_V3.1570 | <i>L. infantum</i> | 49  | 1159 | 1207 |
| LinJ20_V3.1570 | <i>L. infantum</i> | 87  | 1415 | 1501 |
| LinJ20_V3.1570 | <i>L. infantum</i> | 70  | 1522 | 1591 |
| LinJ20_V3.1580 | <i>L. infantum</i> | 133 | 109  | 241  |
| LinJ20_V3.1580 | <i>L. infantum</i> | 51  | 436  | 486  |
| LinJ20_V3.1580 | <i>L. infantum</i> | 80  | 733  | 812  |
| LinJ20_V3.1590 | <i>L. infantum</i> | 84  | 1    | 84   |
| LinJ20_V3.1600 | <i>L. infantum</i> | 45  | 1    | 45   |

|                |                    |     |      |      |
|----------------|--------------------|-----|------|------|
| LinJ20_V3.1600 | <i>L. infantum</i> | 155 | 87   | 241  |
| LinJ20_V3.1610 | <i>L. infantum</i> | 49  | 165  | 213  |
| LinJ20_V3.1640 | <i>L. infantum</i> | 102 | 1    | 102  |
| LinJ20_V3.1640 | <i>L. infantum</i> | 53  | 264  | 316  |
| LinJ20_V3.1650 | <i>L. infantum</i> | 49  | 103  | 151  |
| LinJ20_V3.1650 | <i>L. infantum</i> | 103 | 702  | 804  |
| LinJ20_V3.1650 | <i>L. infantum</i> | 103 | 702  | 804  |
| LinJ20_V3.1670 | <i>L. infantum</i> | 176 | 1    | 176  |
| LinJ20_V3.1670 | <i>L. infantum</i> | 75  | 200  | 274  |
| LinJ20_V3.1680 | <i>L. infantum</i> | 53  | 100  | 152  |
| LinJ20_V3.1680 | <i>L. infantum</i> | 51  | 553  | 603  |
| LinJ20_V3.1690 | <i>L. infantum</i> | 52  | 119  | 170  |
| LinJ20_V3.1700 | <i>L. infantum</i> | 40  | 280  | 319  |
| LinJ20_V3.1710 | <i>L. infantum</i> | 40  | 78   | 117  |
| LinJ20_V3.1720 | <i>L. infantum</i> | 40  | 61   | 100  |
| LinJ20_V3.1730 | <i>L. infantum</i> | 40  | 62   | 101  |
| LinJ20_V3.1740 | <i>L. infantum</i> | 40  | 209  | 248  |
| LinJ20_V3.1750 | <i>L. infantum</i> | 55  | 88   | 142  |
| LinJ20_V3.1750 | <i>L. infantum</i> | 46  | 618  | 663  |
| LinJ20_V3.1750 | <i>L. infantum</i> | 56  | 694  | 749  |
| LinJ20_V3.1750 | <i>L. infantum</i> | 74  | 815  | 888  |
| LinJ20_V3.1750 | <i>L. infantum</i> | 112 | 907  | 1018 |
| LinJ20_V3.1790 | <i>L. infantum</i> | 41  | 189  | 229  |
| LinJ21_V3.0010 | <i>L. infantum</i> | 83  | 1    | 83   |
| LinJ21_V3.0010 | <i>L. infantum</i> | 48  | 136  | 183  |
| LinJ21_V3.0010 | <i>L. infantum</i> | 48  | 136  | 183  |
| LinJ21_V3.0020 | <i>L. infantum</i> | 49  | 1    | 49   |
| LinJ21_V3.0060 | <i>L. infantum</i> | 128 | 104  | 231  |
| LinJ21_V3.0070 | <i>L. infantum</i> | 47  | 1    | 47   |
| LinJ21_V3.0070 | <i>L. infantum</i> | 74  | 125  | 198  |
| LinJ21_V3.0070 | <i>L. infantum</i> | 74  | 125  | 198  |
| LinJ21_V3.0080 | <i>L. infantum</i> | 61  | 91   | 151  |
| LinJ21_V3.0090 | <i>L. infantum</i> | 40  | 279  | 318  |
| LinJ21_V3.0100 | <i>L. infantum</i> | 53  | 1    | 53   |
| LinJ21_V3.0110 | <i>L. infantum</i> | 42  | 194  | 235  |
| LinJ21_V3.0140 | <i>L. infantum</i> | 58  | 94   | 151  |
| LinJ21_V3.0160 | <i>L. infantum</i> | 40  | 161  | 200  |
| LinJ21_V3.0160 | <i>L. infantum</i> | 76  | 541  | 616  |
| LinJ21_V3.0160 | <i>L. infantum</i> | 50  | 661  | 710  |
| LinJ21_V3.0180 | <i>L. infantum</i> | 50  | 377  | 426  |
| LinJ21_V3.0180 | <i>L. infantum</i> | 86  | 495  | 580  |
| LinJ21_V3.0180 | <i>L. infantum</i> | 64  | 746  | 809  |
| LinJ21_V3.0190 | <i>L. infantum</i> | 60  | 1    | 60   |
| LinJ21_V3.0190 | <i>L. infantum</i> | 195 | 93   | 287  |
| LinJ21_V3.0190 | <i>L. infantum</i> | 207 | 1214 | 1420 |
| LinJ21_V3.0200 | <i>L. infantum</i> | 73  | 56   | 128  |
| LinJ21_V3.0200 | <i>L. infantum</i> | 52  | 606  | 657  |



|                |                    |     |      |      |
|----------------|--------------------|-----|------|------|
| LinJ21_V3.0200 | <i>L. infantum</i> | 52  | 606  | 657  |
| LinJ21_V3.0210 | <i>L. infantum</i> | 43  | 1    | 43   |
| LinJ21_V3.0220 | <i>L. infantum</i> | 47  | 139  | 185  |
| LinJ21_V3.0220 | <i>L. infantum</i> | 99  | 451  | 549  |
| LinJ21_V3.0220 | <i>L. infantum</i> | 99  | 451  | 549  |
| LinJ21_V3.0230 | <i>L. infantum</i> | 69  | 1    | 69   |
| LinJ21_V3.0230 | <i>L. infantum</i> | 42  | 153  | 194  |
| LinJ21_V3.0230 | <i>L. infantum</i> | 44  | 673  | 716  |
| LinJ21_V3.0240 | <i>L. infantum</i> | 321 | 168  | 488  |
| LinJ21_V3.0240 | <i>L. infantum</i> | 54  | 878  | 931  |
| LinJ21_V3.0250 | <i>L. infantum</i> | 93  | 67   | 159  |
| LinJ21_V3.0250 | <i>L. infantum</i> | 47  | 195  | 241  |
| LinJ21_V3.0260 | <i>L. infantum</i> | 45  | 103  | 147  |
| LinJ21_V3.0260 | <i>L. infantum</i> | 73  | 457  | 529  |
| LinJ21_V3.0260 | <i>L. infantum</i> | 81  | 758  | 838  |
| LinJ21_V3.0290 | <i>L. infantum</i> | 50  | 304  | 353  |
| LinJ21_V3.0290 | <i>L. infantum</i> | 59  | 463  | 521  |
| LinJ21_V3.0290 | <i>L. infantum</i> | 59  | 463  | 521  |
| LinJ21_V3.0330 | <i>L. infantum</i> | 49  | 159  | 207  |
| LinJ21_V3.0330 | <i>L. infantum</i> | 117 | 274  | 390  |
| LinJ21_V3.0330 | <i>L. infantum</i> | 68  | 597  | 664  |
| LinJ21_V3.0330 | <i>L. infantum</i> | 70  | 741  | 810  |
| LinJ21_V3.0330 | <i>L. infantum</i> | 63  | 972  | 1034 |
| LinJ21_V3.0340 | <i>L. infantum</i> | 43  | 138  | 180  |
| LinJ21_V3.0350 | <i>L. infantum</i> | 75  | 41   | 115  |
| LinJ21_V3.0350 | <i>L. infantum</i> | 64  | 152  | 215  |
| LinJ21_V3.0350 | <i>L. infantum</i> | 58  | 266  | 323  |
| LinJ21_V3.0350 | <i>L. infantum</i> | 43  | 370  | 412  |
| LinJ21_V3.0350 | <i>L. infantum</i> | 41  | 555  | 595  |
| LinJ21_V3.0350 | <i>L. infantum</i> | 52  | 778  | 829  |
| LinJ21_V3.0350 | <i>L. infantum</i> | 44  | 1029 | 1072 |
| LinJ21_V3.0360 | <i>L. infantum</i> | 50  | 1    | 50   |
| LinJ21_V3.0360 | <i>L. infantum</i> | 56  | 188  | 243  |
| LinJ21_V3.0370 | <i>L. infantum</i> | 48  | 176  | 223  |
| LinJ21_V3.0380 | <i>L. infantum</i> | 72  | 1    | 72   |
| LinJ21_V3.0380 | <i>L. infantum</i> | 110 | 128  | 237  |
| LinJ21_V3.0390 | <i>L. infantum</i> | 78  | 1    | 78   |
| LinJ21_V3.0390 | <i>L. infantum</i> | 97  | 635  | 731  |
| LinJ21_V3.0390 | <i>L. infantum</i> | 204 | 864  | 1067 |
| LinJ21_V3.0420 | <i>L. infantum</i> | 44  | 40   | 83   |
| LinJ21_V3.0420 | <i>L. infantum</i> | 164 | 114  | 277  |
| LinJ21_V3.0430 | <i>L. infantum</i> | 60  | 1    | 60   |
| LinJ21_V3.0430 | <i>L. infantum</i> | 147 | 131  | 277  |
| LinJ21_V3.0430 | <i>L. infantum</i> | 93  | 333  | 425  |
| LinJ21_V3.0430 | <i>L. infantum</i> | 55  | 432  | 486  |
| LinJ21_V3.0430 | <i>L. infantum</i> | 47  | 525  | 571  |
| LinJ21_V3.0460 | <i>L. infantum</i> | 247 | 1    | 247  |

|                |                    |     |     |     |
|----------------|--------------------|-----|-----|-----|
| LinJ21_V3.0460 | <i>L. infantum</i> | 60  | 391 | 450 |
| LinJ21_V3.0460 | <i>L. infantum</i> | 61  | 581 | 641 |
| LinJ21_V3.0470 | <i>L. infantum</i> | 107 | 49  | 155 |
| LinJ21_V3.0470 | <i>L. infantum</i> | 50  | 207 | 256 |
| LinJ21_V3.0470 | <i>L. infantum</i> | 43  | 407 | 449 |
| LinJ21_V3.0470 | <i>L. infantum</i> | 47  | 545 | 591 |
| LinJ21_V3.0470 | <i>L. infantum</i> | 63  | 661 | 723 |
| LinJ21_V3.0480 | <i>L. infantum</i> | 56  | 32  | 87  |
| LinJ21_V3.0480 | <i>L. infantum</i> | 52  | 343 | 394 |
| LinJ21_V3.0480 | <i>L. infantum</i> | 53  | 521 | 573 |
| LinJ21_V3.0490 | <i>L. infantum</i> | 185 | 160 | 344 |
| LinJ21_V3.0520 | <i>L. infantum</i> | 47  | 1   | 47  |
| LinJ21_V3.0520 | <i>L. infantum</i> | 207 | 239 | 445 |
| LinJ21_V3.0520 | <i>L. infantum</i> | 88  | 450 | 537 |
| LinJ21_V3.0520 | <i>L. infantum</i> | 60  | 581 | 640 |
| LinJ21_V3.0530 | <i>L. infantum</i> | 64  | 239 | 302 |
| LinJ21_V3.0540 | <i>L. infantum</i> | 172 | 36  | 207 |
| LinJ21_V3.0540 | <i>L. infantum</i> | 69  | 283 | 351 |
| LinJ21_V3.0540 | <i>L. infantum</i> | 52  | 445 | 496 |
| LinJ21_V3.0550 | <i>L. infantum</i> | 88  | 366 | 453 |
| LinJ21_V3.0570 | <i>L. infantum</i> | 107 | 332 | 438 |
| LinJ21_V3.0580 | <i>L. infantum</i> | 73  | 117 | 189 |
| LinJ21_V3.0580 | <i>L. infantum</i> | 51  | 366 | 416 |
| LinJ21_V3.0580 | <i>L. infantum</i> | 51  | 366 | 416 |
| LinJ21_V3.0590 | <i>L. infantum</i> | 40  | 93  | 132 |
| LinJ21_V3.0590 | <i>L. infantum</i> | 149 | 158 | 306 |
| LinJ21_V3.0590 | <i>L. infantum</i> | 148 | 359 | 506 |
| LinJ21_V3.0590 | <i>L. infantum</i> | 63  | 737 | 799 |
| LinJ21_V3.0600 | <i>L. infantum</i> | 61  | 164 | 224 |
| LinJ21_V3.0600 | <i>L. infantum</i> | 69  | 268 | 336 |
| LinJ21_V3.0610 | <i>L. infantum</i> | 65  | 91  | 155 |
| LinJ21_V3.0610 | <i>L. infantum</i> | 157 | 222 | 378 |
| LinJ21_V3.0610 | <i>L. infantum</i> | 157 | 222 | 378 |
| LinJ21_V3.0630 | <i>L. infantum</i> | 236 | 181 | 416 |
| LinJ21_V3.0640 | <i>L. infantum</i> | 110 | 136 | 245 |
| LinJ21_V3.0640 | <i>L. infantum</i> | 96  | 250 | 345 |
| LinJ21_V3.0640 | <i>L. infantum</i> | 43  | 380 | 422 |
| LinJ21_V3.0650 | <i>L. infantum</i> | 160 | 1   | 160 |
| LinJ21_V3.0650 | <i>L. infantum</i> | 130 | 259 | 388 |
| LinJ21_V3.0660 | <i>L. infantum</i> | 99  | 1   | 99  |
| LinJ21_V3.0670 | <i>L. infantum</i> | 75  | 215 | 289 |
| LinJ21_V3.0670 | <i>L. infantum</i> | 66  | 428 | 493 |
| LinJ21_V3.0680 | <i>L. infantum</i> | 40  | 363 | 402 |
| LinJ21_V3.0680 | <i>L. infantum</i> | 61  | 515 | 575 |
| LinJ21_V3.0680 | <i>L. infantum</i> | 189 | 598 | 786 |
| LinJ21_V3.0690 | <i>L. infantum</i> | 44  | 148 | 191 |
| LinJ21_V3.0690 | <i>L. infantum</i> | 244 | 517 | 760 |

|                |                    |     |      |      |
|----------------|--------------------|-----|------|------|
| LinJ21_V3.0710 | <i>L. infantum</i> | 59  | 24   | 82   |
| LinJ21_V3.0710 | <i>L. infantum</i> | 51  | 243  | 293  |
| LinJ21_V3.0710 | <i>L. infantum</i> | 95  | 358  | 452  |
| LinJ21_V3.0710 | <i>L. infantum</i> | 43  | 656  | 698  |
| LinJ21_V3.0720 | <i>L. infantum</i> | 47  | 1    | 47   |
| LinJ21_V3.0740 | <i>L. infantum</i> | 41  | 390  | 430  |
| LinJ21_V3.0760 | <i>L. infantum</i> | 397 | 225  | 621  |
| LinJ21_V3.0770 | <i>L. infantum</i> | 83  | 577  | 659  |
| LinJ21_V3.0780 | <i>L. infantum</i> | 45  | 77   | 121  |
| LinJ21_V3.0790 | <i>L. infantum</i> | 50  | 332  | 381  |
| LinJ21_V3.0850 | <i>L. infantum</i> | 73  | 1    | 73   |
| LinJ21_V3.0850 | <i>L. infantum</i> | 194 | 304  | 497  |
| LinJ21_V3.0860 | <i>L. infantum</i> | 110 | 95   | 204  |
| LinJ21_V3.0860 | <i>L. infantum</i> | 89  | 466  | 554  |
| LinJ21_V3.0860 | <i>L. infantum</i> | 48  | 616  | 663  |
| LinJ21_V3.0870 | <i>L. infantum</i> | 128 | 161  | 288  |
| LinJ21_V3.0880 | <i>L. infantum</i> | 59  | 764  | 822  |
| LinJ21_V3.0880 | <i>L. infantum</i> | 74  | 1075 | 1148 |
| LinJ21_V3.0880 | <i>L. infantum</i> | 44  | 1316 | 1359 |
| LinJ21_V3.0880 | <i>L. infantum</i> | 50  | 1448 | 1497 |
| LinJ21_V3.0900 | <i>L. infantum</i> | 217 | 1    | 217  |
| LinJ21_V3.0900 | <i>L. infantum</i> | 48  | 741  | 788  |
| LinJ21_V3.0910 | <i>L. infantum</i> | 54  | 62   | 115  |
| LinJ21_V3.0910 | <i>L. infantum</i> | 60  | 243  | 302  |
| LinJ21_V3.0910 | <i>L. infantum</i> | 127 | 394  | 520  |
| LinJ21_V3.0910 | <i>L. infantum</i> | 92  | 699  | 790  |
| LinJ21_V3.0920 | <i>L. infantum</i> | 249 | 1    | 249  |
| LinJ21_V3.0920 | <i>L. infantum</i> | 533 | 279  | 811  |
| LinJ21_V3.0920 | <i>L. infantum</i> | 56  | 824  | 879  |
| LinJ21_V3.0920 | <i>L. infantum</i> | 575 | 886  | 1460 |
| LinJ21_V3.0920 | <i>L. infantum</i> | 441 | 1506 | 1946 |
| LinJ21_V3.0920 | <i>L. infantum</i> | 104 | 2005 | 2108 |
| LinJ21_V3.0920 | <i>L. infantum</i> | 325 | 2111 | 2435 |
| LinJ21_V3.0920 | <i>L. infantum</i> | 367 | 2445 | 2811 |
| LinJ21_V3.0930 | <i>L. infantum</i> | 56  | 61   | 116  |
| LinJ21_V3.0940 | <i>L. infantum</i> | 67  | 256  | 322  |
| LinJ21_V3.0960 | <i>L. infantum</i> | 107 | 1    | 107  |
| LinJ21_V3.0960 | <i>L. infantum</i> | 45  | 119  | 163  |
| LinJ21_V3.0970 | <i>L. infantum</i> | 118 | 1    | 118  |
| LinJ21_V3.0970 | <i>L. infantum</i> | 66  | 254  | 319  |
| LinJ21_V3.1000 | <i>L. infantum</i> | 181 | 143  | 323  |
| LinJ21_V3.1000 | <i>L. infantum</i> | 260 | 498  | 757  |
| LinJ21_V3.1000 | <i>L. infantum</i> | 66  | 781  | 846  |
| LinJ21_V3.1000 | <i>L. infantum</i> | 332 | 881  | 1212 |
| LinJ21_V3.1000 | <i>L. infantum</i> | 144 | 1224 | 1367 |
| LinJ21_V3.1000 | <i>L. infantum</i> | 348 | 1426 | 1773 |
| LinJ21_V3.1000 | <i>L. infantum</i> | 260 | 1827 | 2086 |

|                |                    |     |      |      |
|----------------|--------------------|-----|------|------|
| LinJ21_V3.1000 | <i>L. infantum</i> | 92  | 2188 | 2279 |
| LinJ21_V3.1010 | <i>L. infantum</i> | 56  | 1    | 56   |
| LinJ21_V3.1010 | <i>L. infantum</i> | 55  | 89   | 143  |
| LinJ21_V3.1010 | <i>L. infantum</i> | 48  | 188  | 235  |
| LinJ21_V3.1020 | <i>L. infantum</i> | 748 | 1    | 748  |
| LinJ21_V3.1020 | <i>L. infantum</i> | 379 | 758  | 1136 |
| LinJ21_V3.1020 | <i>L. infantum</i> | 446 | 1164 | 1609 |
| LinJ21_V3.1020 | <i>L. infantum</i> | 152 | 1714 | 1865 |
| LinJ21_V3.1020 | <i>L. infantum</i> | 105 | 1881 | 1985 |
| LinJ21_V3.1020 | <i>L. infantum</i> | 147 | 1999 | 2145 |
| LinJ21_V3.1020 | <i>L. infantum</i> | 355 | 2252 | 2606 |
| LinJ21_V3.1030 | <i>L. infantum</i> | 118 | 1    | 118  |
| LinJ21_V3.1030 | <i>L. infantum</i> | 45  | 139  | 183  |
| LinJ21_V3.1030 | <i>L. infantum</i> | 42  | 224  | 265  |
| LinJ21_V3.1030 | <i>L. infantum</i> | 58  | 384  | 441  |
| LinJ21_V3.1030 | <i>L. infantum</i> | 46  | 631  | 676  |
| LinJ21_V3.1040 | <i>L. infantum</i> | 135 | 1    | 135  |
| LinJ21_V3.1040 | <i>L. infantum</i> | 159 | 148  | 306  |
| LinJ21_V3.1040 | <i>L. infantum</i> | 99  | 322  | 420  |
| LinJ21_V3.1040 | <i>L. infantum</i> | 430 | 487  | 916  |
| LinJ21_V3.1050 | <i>L. infantum</i> | 302 | 554  | 855  |
| LinJ21_V3.1060 | <i>L. infantum</i> | 48  | 1    | 48   |
| LinJ21_V3.1060 | <i>L. infantum</i> | 186 | 81   | 266  |
| LinJ21_V3.1060 | <i>L. infantum</i> | 184 | 288  | 471  |
| LinJ21_V3.1060 | <i>L. infantum</i> | 94  | 767  | 860  |
| LinJ21_V3.1070 | <i>L. infantum</i> | 89  | 1    | 89   |
| LinJ21_V3.1070 | <i>L. infantum</i> | 63  | 314  | 376  |
| LinJ21_V3.1070 | <i>L. infantum</i> | 67  | 503  | 569  |
| LinJ21_V3.1100 | <i>L. infantum</i> | 95  | 1    | 95   |
| LinJ21_V3.1100 | <i>L. infantum</i> | 321 | 107  | 427  |
| LinJ21_V3.1100 | <i>L. infantum</i> | 50  | 599  | 648  |
| LinJ21_V3.1100 | <i>L. infantum</i> | 99  | 714  | 812  |
| LinJ21_V3.1100 | <i>L. infantum</i> | 69  | 842  | 910  |
| LinJ21_V3.1100 | <i>L. infantum</i> | 87  | 1002 | 1088 |
| LinJ21_V3.1100 | <i>L. infantum</i> | 166 | 1168 | 1333 |
| LinJ21_V3.1110 | <i>L. infantum</i> | 118 | 439  | 556  |
| LinJ21_V3.1120 | <i>L. infantum</i> | 166 | 1    | 166  |
| LinJ21_V3.1120 | <i>L. infantum</i> | 62  | 390  | 451  |
| LinJ21_V3.1130 | <i>L. infantum</i> | 81  | 1    | 81   |
| LinJ21_V3.1130 | <i>L. infantum</i> | 100 | 127  | 226  |
| LinJ21_V3.1130 | <i>L. infantum</i> | 100 | 127  | 226  |
| LinJ21_V3.1140 | <i>L. infantum</i> | 50  | 158  | 207  |
| LinJ21_V3.1150 | <i>L. infantum</i> | 121 | 71   | 191  |
| LinJ21_V3.1160 | <i>L. infantum</i> | 41  | 92   | 132  |
| LinJ21_V3.1170 | <i>L. infantum</i> | 41  | 92   | 132  |
| LinJ21_V3.1190 | <i>L. infantum</i> | 112 | 75   | 186  |
| LinJ21_V3.1190 | <i>L. infantum</i> | 53  | 279  | 331  |

|                |                    |     |      |      |
|----------------|--------------------|-----|------|------|
| LinJ21_V3.1190 | <i>L. infantum</i> | 60  | 371  | 430  |
| LinJ21_V3.1210 | <i>L. infantum</i> | 94  | 48   | 141  |
| LinJ21_V3.1210 | <i>L. infantum</i> | 47  | 155  | 201  |
| LinJ21_V3.1210 | <i>L. infantum</i> | 130 | 267  | 396  |
| LinJ21_V3.1210 | <i>L. infantum</i> | 69  | 561  | 629  |
| LinJ21_V3.1210 | <i>L. infantum</i> | 63  | 700  | 762  |
| LinJ21_V3.1240 | <i>L. infantum</i> | 52  | 1    | 52   |
| LinJ21_V3.1240 | <i>L. infantum</i> | 78  | 107  | 184  |
| LinJ21_V3.1240 | <i>L. infantum</i> | 70  | 222  | 291  |
| LinJ21_V3.1240 | <i>L. infantum</i> | 874 | 380  | 1253 |
| LinJ21_V3.1240 | <i>L. infantum</i> | 779 | 1270 | 2048 |
| LinJ21_V3.1250 | <i>L. infantum</i> | 40  | 202  | 241  |
| LinJ21_V3.1260 | <i>L. infantum</i> | 81  | 214  | 294  |
| LinJ21_V3.1270 | <i>L. infantum</i> | 127 | 32   | 158  |
| LinJ21_V3.1270 | <i>L. infantum</i> | 651 | 172  | 822  |
| LinJ21_V3.1280 | <i>L. infantum</i> | 51  | 91   | 141  |
| LinJ21_V3.1280 | <i>L. infantum</i> | 58  | 633  | 690  |
| LinJ21_V3.1280 | <i>L. infantum</i> | 342 | 853  | 1194 |
| LinJ21_V3.1280 | <i>L. infantum</i> | 153 | 1318 | 1470 |
| LinJ21_V3.1280 | <i>L. infantum</i> | 205 | 1622 | 1826 |
| LinJ21_V3.1280 | <i>L. infantum</i> | 265 | 1861 | 2125 |
| LinJ21_V3.1330 | <i>L. infantum</i> | 43  | 1    | 43   |
| LinJ21_V3.1340 | <i>L. infantum</i> | 148 | 1    | 148  |
| LinJ21_V3.1340 | <i>L. infantum</i> | 48  | 171  | 218  |
| LinJ21_V3.1340 | <i>L. infantum</i> | 52  | 249  | 300  |
| LinJ21_V3.1340 | <i>L. infantum</i> | 43  | 340  | 382  |
| LinJ21_V3.1340 | <i>L. infantum</i> | 100 | 599  | 698  |
| LinJ21_V3.1350 | <i>L. infantum</i> | 41  | 1    | 41   |
| LinJ21_V3.1350 | <i>L. infantum</i> | 43  | 77   | 119  |
| LinJ21_V3.1350 | <i>L. infantum</i> | 354 | 461  | 814  |
| LinJ21_V3.1350 | <i>L. infantum</i> | 149 | 828  | 976  |
| LinJ21_V3.1350 | <i>L. infantum</i> | 58  | 1261 | 1318 |
| LinJ21_V3.1350 | <i>L. infantum</i> | 50  | 1334 | 1383 |
| LinJ21_V3.1350 | <i>L. infantum</i> | 42  | 1522 | 1563 |
| LinJ21_V3.1350 | <i>L. infantum</i> | 74  | 1596 | 1669 |
| LinJ21_V3.1350 | <i>L. infantum</i> | 49  | 1721 | 1769 |
| LinJ21_V3.1360 | <i>L. infantum</i> | 40  | 209  | 248  |
| LinJ21_V3.1360 | <i>L. infantum</i> | 78  | 533  | 610  |
| LinJ21_V3.1360 | <i>L. infantum</i> | 78  | 533  | 610  |
| LinJ21_V3.1370 | <i>L. infantum</i> | 187 | 10   | 196  |
| LinJ21_V3.1370 | <i>L. infantum</i> | 349 | 199  | 547  |
| LinJ21_V3.1380 | <i>L. infantum</i> | 54  | 66   | 119  |
| LinJ21_V3.1380 | <i>L. infantum</i> | 151 | 153  | 303  |
| LinJ21_V3.1390 | <i>L. infantum</i> | 462 | 1    | 462  |
| LinJ21_V3.1390 | <i>L. infantum</i> | 171 | 529  | 699  |
| LinJ21_V3.1390 | <i>L. infantum</i> | 476 | 738  | 1213 |
| LinJ21_V3.1390 | <i>L. infantum</i> | 445 | 1223 | 1667 |

|                |                    |     |      |      |
|----------------|--------------------|-----|------|------|
| LinJ21_V3.1400 | <i>L. infantum</i> | 654 | 1    | 654  |
| LinJ21_V3.1400 | <i>L. infantum</i> | 106 | 724  | 829  |
| LinJ21_V3.1410 | <i>L. infantum</i> | 46  | 137  | 182  |
| LinJ21_V3.1410 | <i>L. infantum</i> | 54  | 424  | 477  |
| LinJ21_V3.1410 | <i>L. infantum</i> | 54  | 424  | 477  |
| LinJ21_V3.1430 | <i>L. infantum</i> | 141 | 116  | 256  |
| LinJ21_V3.1430 | <i>L. infantum</i> | 77  | 710  | 786  |
| LinJ21_V3.1440 | <i>L. infantum</i> | 128 | 56   | 183  |
| LinJ21_V3.1450 | <i>L. infantum</i> | 105 | 180  | 284  |
| LinJ21_V3.1460 | <i>L. infantum</i> | 222 | 63   | 284  |
| LinJ21_V3.1460 | <i>L. infantum</i> | 166 | 377  | 542  |
| LinJ21_V3.1460 | <i>L. infantum</i> | 443 | 609  | 1051 |
| LinJ21_V3.1460 | <i>L. infantum</i> | 55  | 1078 | 1132 |
| LinJ21_V3.1460 | <i>L. infantum</i> | 215 | 1158 | 1372 |
| LinJ21_V3.1470 | <i>L. infantum</i> | 50  | 1    | 50   |
| LinJ21_V3.1470 | <i>L. infantum</i> | 62  | 378  | 439  |
| LinJ21_V3.1470 | <i>L. infantum</i> | 56  | 485  | 540  |
| LinJ21_V3.1480 | <i>L. infantum</i> | 72  | 1    | 72   |
| LinJ21_V3.1480 | <i>L. infantum</i> | 259 | 417  | 675  |
| LinJ21_V3.1480 | <i>L. infantum</i> | 497 | 766  | 1262 |
| LinJ21_V3.1500 | <i>L. infantum</i> | 93  | 195  | 287  |
| LinJ21_V3.1500 | <i>L. infantum</i> | 114 | 385  | 498  |
| LinJ21_V3.1510 | <i>L. infantum</i> | 79  | 312  | 390  |
| LinJ21_V3.1510 | <i>L. infantum</i> | 97  | 442  | 538  |
| LinJ21_V3.1510 | <i>L. infantum</i> | 73  | 718  | 790  |
| LinJ21_V3.1520 | <i>L. infantum</i> | 111 | 1    | 111  |
| LinJ21_V3.1520 | <i>L. infantum</i> | 43  | 332  | 374  |
| LinJ21_V3.1540 | <i>L. infantum</i> | 160 | 79   | 238  |
| LinJ21_V3.1550 | <i>L. infantum</i> | 126 | 1    | 126  |
| LinJ21_V3.1550 | <i>L. infantum</i> | 191 | 136  | 326  |
| LinJ21_V3.1550 | <i>L. infantum</i> | 59  | 377  | 435  |
| LinJ21_V3.1550 | <i>L. infantum</i> | 57  | 484  | 540  |
| LinJ21_V3.1580 | <i>L. infantum</i> | 173 | 1    | 173  |
| LinJ21_V3.1580 | <i>L. infantum</i> | 40  | 381  | 420  |
| LinJ21_V3.1580 | <i>L. infantum</i> | 254 | 423  | 676  |
| LinJ21_V3.1580 | <i>L. infantum</i> | 174 | 817  | 990  |
| LinJ21_V3.1580 | <i>L. infantum</i> | 271 | 996  | 1266 |
| LinJ21_V3.1580 | <i>L. infantum</i> | 110 | 1490 | 1599 |
| LinJ21_V3.1600 | <i>L. infantum</i> | 357 | 1    | 357  |
| LinJ21_V3.1600 | <i>L. infantum</i> | 49  | 369  | 417  |
| LinJ21_V3.1600 | <i>L. infantum</i> | 57  | 617  | 673  |
| LinJ21_V3.1600 | <i>L. infantum</i> | 43  | 803  | 845  |
| LinJ21_V3.1600 | <i>L. infantum</i> | 99  | 909  | 1007 |
| LinJ21_V3.1600 | <i>L. infantum</i> | 463 | 1121 | 1583 |
| LinJ21_V3.1610 | <i>L. infantum</i> | 71  | 64   | 134  |
| LinJ21_V3.1610 | <i>L. infantum</i> | 42  | 191  | 232  |
| LinJ21_V3.1610 | <i>L. infantum</i> | 42  | 191  | 232  |

|                |                    |     |      |      |
|----------------|--------------------|-----|------|------|
| LinJ21_V3.1620 | <i>L. infantum</i> | 40  | 147  | 186  |
| LinJ21_V3.1620 | <i>L. infantum</i> | 209 | 297  | 505  |
| LinJ21_V3.1620 | <i>L. infantum</i> | 63  | 548  | 610  |
| LinJ21_V3.1620 | <i>L. infantum</i> | 73  | 714  | 786  |
| LinJ21_V3.1620 | <i>L. infantum</i> | 86  | 814  | 899  |
| LinJ21_V3.1620 | <i>L. infantum</i> | 79  | 935  | 1013 |
| LinJ21_V3.1630 | <i>L. infantum</i> | 106 | 245  | 350  |
| LinJ21_V3.1640 | <i>L. infantum</i> | 102 | 113  | 214  |
| LinJ21_V3.1650 | <i>L. infantum</i> | 68  | 51   | 118  |
| LinJ21_V3.1650 | <i>L. infantum</i> | 47  | 147  | 193  |
| LinJ21_V3.1650 | <i>L. infantum</i> | 89  | 264  | 352  |
| LinJ21_V3.1670 | <i>L. infantum</i> | 73  | 370  | 442  |
| LinJ21_V3.1690 | <i>L. infantum</i> | 60  | 116  | 175  |
| LinJ21_V3.1690 | <i>L. infantum</i> | 41  | 348  | 388  |
| LinJ21_V3.1690 | <i>L. infantum</i> | 125 | 429  | 553  |
| LinJ21_V3.1700 | <i>L. infantum</i> | 265 | 28   | 292  |
| LinJ21_V3.1700 | <i>L. infantum</i> | 166 | 329  | 494  |
| LinJ21_V3.1720 | <i>L. infantum</i> | 248 | 1    | 248  |
| LinJ21_V3.1720 | <i>L. infantum</i> | 64  | 342  | 405  |
| LinJ21_V3.1720 | <i>L. infantum</i> | 85  | 418  | 502  |
| LinJ21_V3.1720 | <i>L. infantum</i> | 302 | 509  | 810  |
| LinJ21_V3.1730 | <i>L. infantum</i> | 365 | 1    | 365  |
| LinJ21_V3.1730 | <i>L. infantum</i> | 228 | 439  | 666  |
| LinJ21_V3.1740 | <i>L. infantum</i> | 56  | 470  | 525  |
| LinJ21_V3.1750 | <i>L. infantum</i> | 82  | 59   | 140  |
| LinJ21_V3.1750 | <i>L. infantum</i> | 268 | 196  | 463  |
| LinJ21_V3.1750 | <i>L. infantum</i> | 58  | 627  | 684  |
| LinJ21_V3.1750 | <i>L. infantum</i> | 73  | 720  | 792  |
| LinJ21_V3.1750 | <i>L. infantum</i> | 117 | 896  | 1012 |
| LinJ21_V3.1750 | <i>L. infantum</i> | 221 | 1245 | 1465 |
| LinJ21_V3.1760 | <i>L. infantum</i> | 67  | 1    | 67   |
| LinJ21_V3.1760 | <i>L. infantum</i> | 185 | 99   | 283  |
| LinJ21_V3.1770 | <i>L. infantum</i> | 55  | 452  | 506  |
| LinJ21_V3.1770 | <i>L. infantum</i> | 65  | 574  | 638  |
| LinJ21_V3.1770 | <i>L. infantum</i> | 65  | 574  | 638  |
| LinJ21_V3.1780 | <i>L. infantum</i> | 78  | 120  | 197  |
| LinJ21_V3.1780 | <i>L. infantum</i> | 138 | 205  | 342  |
| LinJ21_V3.1780 | <i>L. infantum</i> | 50  | 596  | 645  |
| LinJ21_V3.1780 | <i>L. infantum</i> | 89  | 842  | 930  |
| LinJ21_V3.1780 | <i>L. infantum</i> | 49  | 1384 | 1432 |
| LinJ21_V3.1780 | <i>L. infantum</i> | 325 | 1732 | 2056 |
| LinJ21_V3.1800 | <i>L. infantum</i> | 266 | 279  | 544  |
| LinJ21_V3.1820 | <i>L. infantum</i> | 68  | 1    | 68   |
| LinJ21_V3.1820 | <i>L. infantum</i> | 46  | 472  | 517  |
| LinJ21_V3.1840 | <i>L. infantum</i> | 82  | 1    | 82   |
| LinJ21_V3.1840 | <i>L. infantum</i> | 45  | 116  | 160  |
| LinJ21_V3.1840 | <i>L. infantum</i> | 45  | 116  | 160  |

|                |                    |     |     |      |
|----------------|--------------------|-----|-----|------|
| LinJ21_V3.1850 | <i>L. infantum</i> | 108 | 1   | 108  |
| LinJ21_V3.1850 | <i>L. infantum</i> | 77  | 169 | 245  |
| LinJ21_V3.1850 | <i>L. infantum</i> | 152 | 269 | 420  |
| LinJ21_V3.1870 | <i>L. infantum</i> | 433 | 265 | 697  |
| LinJ21_V3.1880 | <i>L. infantum</i> | 297 | 84  | 380  |
| LinJ21_V3.1880 | <i>L. infantum</i> | 48  | 406 | 453  |
| LinJ21_V3.1890 | <i>L. infantum</i> | 74  | 1   | 74   |
| LinJ21_V3.1910 | <i>L. infantum</i> | 44  | 130 | 173  |
| LinJ21_V3.1910 | <i>L. infantum</i> | 56  | 385 | 440  |
| LinJ21_V3.1910 | <i>L. infantum</i> | 56  | 385 | 440  |
| LinJ21_V3.1920 | <i>L. infantum</i> | 58  | 325 | 382  |
| LinJ21_V3.1930 | <i>L. infantum</i> | 67  | 324 | 390  |
| LinJ21_V3.1930 | <i>L. infantum</i> | 40  | 625 | 664  |
| LinJ21_V3.1930 | <i>L. infantum</i> | 40  | 625 | 664  |
| LinJ21_V3.1950 | <i>L. infantum</i> | 46  | 1   | 46   |
| LinJ21_V3.1950 | <i>L. infantum</i> | 74  | 102 | 175  |
| LinJ21_V3.1950 | <i>L. infantum</i> | 74  | 102 | 175  |
| LinJ21_V3.1960 | <i>L. infantum</i> | 82  | 1   | 82   |
| LinJ21_V3.1970 | <i>L. infantum</i> | 68  | 94  | 161  |
| LinJ21_V3.2010 | <i>L. infantum</i> | 59  | 30  | 88   |
| LinJ21_V3.2040 | <i>L. infantum</i> | 94  | 1   | 94   |
| LinJ21_V3.2050 | <i>L. infantum</i> | 127 | 30  | 156  |
| LinJ21_V3.2050 | <i>L. infantum</i> | 52  | 503 | 554  |
| LinJ21_V3.2060 | <i>L. infantum</i> | 40  | 212 | 251  |
| LinJ21_V3.2090 | <i>L. infantum</i> | 64  | 1   | 64   |
| LinJ21_V3.2100 | <i>L. infantum</i> | 171 | 1   | 171  |
| LinJ21_V3.2110 | <i>L. infantum</i> | 48  | 1   | 48   |
| LinJ21_V3.2120 | <i>L. infantum</i> | 52  | 126 | 177  |
| LinJ21_V3.2150 | <i>L. infantum</i> | 120 | 130 | 249  |
| LinJ21_V3.2210 | <i>L. infantum</i> | 54  | 1   | 54   |
| LinJ21_V3.2210 | <i>L. infantum</i> | 71  | 82  | 152  |
| LinJ21_V3.2210 | <i>L. infantum</i> | 128 | 179 | 306  |
| LinJ21_V3.2220 | <i>L. infantum</i> | 329 | 1   | 329  |
| LinJ21_V3.2220 | <i>L. infantum</i> | 103 | 359 | 461  |
| LinJ21_V3.2220 | <i>L. infantum</i> | 74  | 498 | 571  |
| LinJ21_V3.2220 | <i>L. infantum</i> | 343 | 671 | 1013 |
| LinJ21_V3.2240 | <i>L. infantum</i> | 40  | 404 | 443  |
| LinJ22_V3.0002 | <i>L. infantum</i> | 49  | 75  | 123  |
| LinJ22_V3.0004 | <i>L. infantum</i> | 50  | 139 | 188  |
| LinJ22_V3.0006 | <i>L. infantum</i> | 242 | 1   | 242  |
| LinJ22_V3.0006 | <i>L. infantum</i> | 264 | 318 | 581  |
| LinJ22_V3.0007 | <i>L. infantum</i> | 278 | 87  | 364  |
| LinJ22_V3.0007 | <i>L. infantum</i> | 167 | 388 | 554  |
| LinJ22_V3.0007 | <i>L. infantum</i> | 167 | 388 | 554  |
| LinJ22_V3.0008 | <i>L. infantum</i> | 62  | 1   | 62   |
| LinJ22_V3.0008 | <i>L. infantum</i> | 79  | 318 | 396  |
| LinJ22_V3.0009 | <i>L. infantum</i> | 81  | 57  | 137  |



|                |                    |     |      |      |
|----------------|--------------------|-----|------|------|
| LinJ22_V3.0009 | <i>L. infantum</i> | 51  | 281  | 331  |
| LinJ22_V3.0009 | <i>L. infantum</i> | 51  | 281  | 331  |
| LinJ22_V3.0010 | <i>L. infantum</i> | 90  | 20   | 109  |
| LinJ22_V3.0011 | <i>L. infantum</i> | 41  | 161  | 201  |
| LinJ22_V3.0011 | <i>L. infantum</i> | 44  | 683  | 726  |
| LinJ22_V3.0011 | <i>L. infantum</i> | 44  | 683  | 726  |
| LinJ22_V3.0012 | <i>L. infantum</i> | 58  | 19   | 76   |
| LinJ22_V3.0020 | <i>L. infantum</i> | 228 | 76   | 303  |
| LinJ22_V3.0030 | <i>L. infantum</i> | 43  | 97   | 139  |
| LinJ22_V3.0040 | <i>L. infantum</i> | 68  | 1    | 68   |
| LinJ22_V3.0040 | <i>L. infantum</i> | 51  | 165  | 215  |
| LinJ22_V3.0040 | <i>L. infantum</i> | 133 | 278  | 410  |
| LinJ22_V3.0050 | <i>L. infantum</i> | 424 | 1    | 424  |
| LinJ22_V3.0050 | <i>L. infantum</i> | 43  | 1003 | 1045 |
| LinJ22_V3.0060 | <i>L. infantum</i> | 145 | 1    | 145  |
| LinJ22_V3.0070 | <i>L. infantum</i> | 49  | 97   | 145  |
| LinJ22_V3.0080 | <i>L. infantum</i> | 142 | 1    | 142  |
| LinJ22_V3.0080 | <i>L. infantum</i> | 113 | 214  | 326  |
| LinJ22_V3.0080 | <i>L. infantum</i> | 42  | 387  | 428  |
| LinJ22_V3.0080 | <i>L. infantum</i> | 133 | 932  | 1064 |
| LinJ22_V3.0080 | <i>L. infantum</i> | 146 | 1391 | 1536 |
| LinJ22_V3.0090 | <i>L. infantum</i> | 50  | 694  | 743  |
| LinJ22_V3.0100 | <i>L. infantum</i> | 57  | 1    | 57   |
| LinJ22_V3.0110 | <i>L. infantum</i> | 116 | 1    | 116  |
| LinJ22_V3.0110 | <i>L. infantum</i> | 187 | 143  | 329  |
| LinJ22_V3.0130 | <i>L. infantum</i> | 65  | 218  | 282  |
| LinJ22_V3.0160 | <i>L. infantum</i> | 49  | 24   | 72   |
| LinJ22_V3.0160 | <i>L. infantum</i> | 41  | 364  | 404  |
| LinJ22_V3.0160 | <i>L. infantum</i> | 100 | 571  | 670  |
| LinJ22_V3.0160 | <i>L. infantum</i> | 65  | 777  | 841  |
| LinJ22_V3.0170 | <i>L. infantum</i> | 43  | 219  | 261  |
| LinJ22_V3.0170 | <i>L. infantum</i> | 66  | 341  | 406  |
| LinJ22_V3.0170 | <i>L. infantum</i> | 66  | 341  | 406  |
| LinJ22_V3.0180 | <i>L. infantum</i> | 55  | 1    | 55   |
| LinJ22_V3.0180 | <i>L. infantum</i> | 57  | 185  | 241  |
| LinJ22_V3.0180 | <i>L. infantum</i> | 51  | 414  | 464  |
| LinJ22_V3.0180 | <i>L. infantum</i> | 77  | 485  | 561  |
| LinJ22_V3.0200 | <i>L. infantum</i> | 84  | 41   | 124  |
| LinJ22_V3.0200 | <i>L. infantum</i> | 53  | 224  | 276  |
| LinJ22_V3.0200 | <i>L. infantum</i> | 53  | 224  | 276  |
| LinJ22_V3.0210 | <i>L. infantum</i> | 487 | 1    | 487  |
| LinJ22_V3.0210 | <i>L. infantum</i> | 122 | 511  | 632  |
| LinJ22_V3.0210 | <i>L. infantum</i> | 40  | 660  | 699  |
| LinJ22_V3.0210 | <i>L. infantum</i> | 74  | 702  | 775  |
| LinJ22_V3.0210 | <i>L. infantum</i> | 94  | 788  | 881  |
| LinJ22_V3.0210 | <i>L. infantum</i> | 60  | 980  | 1039 |
| LinJ22_V3.0220 | <i>L. infantum</i> | 52  | 1    | 52   |

|                |                    |      |      |      |
|----------------|--------------------|------|------|------|
| LinJ22_V3.0220 | <i>L. infantum</i> | 51   | 243  | 293  |
| LinJ22_V3.0230 | <i>L. infantum</i> | 133  | 18   | 150  |
| LinJ22_V3.0240 | <i>L. infantum</i> | 76   | 1    | 76   |
| LinJ22_V3.0240 | <i>L. infantum</i> | 59   | 113  | 171  |
| LinJ22_V3.0240 | <i>L. infantum</i> | 41   | 267  | 307  |
| LinJ22_V3.0250 | <i>L. infantum</i> | 53   | 130  | 182  |
| LinJ22_V3.0260 | <i>L. infantum</i> | 45   | 1    | 45   |
| LinJ22_V3.0260 | <i>L. infantum</i> | 50   | 211  | 260  |
| LinJ22_V3.0260 | <i>L. infantum</i> | 67   | 511  | 577  |
| LinJ22_V3.0260 | <i>L. infantum</i> | 81   | 684  | 764  |
| LinJ22_V3.0270 | <i>L. infantum</i> | 57   | 33   | 89   |
| LinJ22_V3.0270 | <i>L. infantum</i> | 41   | 410  | 450  |
| LinJ22_V3.0270 | <i>L. infantum</i> | 41   | 410  | 450  |
| LinJ22_V3.0280 | <i>L. infantum</i> | 100  | 17   | 116  |
| LinJ22_V3.0280 | <i>L. infantum</i> | 119  | 190  | 308  |
| LinJ22_V3.0280 | <i>L. infantum</i> | 50   | 426  | 475  |
| LinJ22_V3.0280 | <i>L. infantum</i> | 42   | 608  | 649  |
| LinJ22_V3.0290 | <i>L. infantum</i> | 54   | 303  | 356  |
| LinJ22_V3.0290 | <i>L. infantum</i> | 48   | 764  | 811  |
| LinJ22_V3.0290 | <i>L. infantum</i> | 79   | 1108 | 1186 |
| LinJ22_V3.0300 | <i>L. infantum</i> | 1150 | 43   | 1192 |
| LinJ22_V3.0310 | <i>L. infantum</i> | 43   | 41   | 83   |
| LinJ22_V3.0320 | <i>L. infantum</i> | 126  | 1    | 126  |
| LinJ22_V3.0320 | <i>L. infantum</i> | 92   | 153  | 244  |
| LinJ22_V3.0320 | <i>L. infantum</i> | 57   | 280  | 336  |
| LinJ22_V3.0320 | <i>L. infantum</i> | 47   | 825  | 871  |
| LinJ22_V3.0320 | <i>L. infantum</i> | 128  | 1030 | 1157 |
| LinJ22_V3.0330 | <i>L. infantum</i> | 86   | 1    | 86   |
| LinJ22_V3.0340 | <i>L. infantum</i> | 43   | 41   | 83   |
| LinJ22_V3.0350 | <i>L. infantum</i> | 76   | 179  | 254  |
| LinJ22_V3.0360 | <i>L. infantum</i> | 60   | 210  | 269  |
| LinJ22_V3.0370 | <i>L. infantum</i> | 142  | 21   | 162  |
| LinJ22_V3.0370 | <i>L. infantum</i> | 44   | 216  | 259  |
| LinJ22_V3.0370 | <i>L. infantum</i> | 62   | 369  | 430  |
| LinJ22_V3.0370 | <i>L. infantum</i> | 121  | 576  | 696  |
| LinJ22_V3.0380 | <i>L. infantum</i> | 285  | 1    | 285  |
| LinJ22_V3.0380 | <i>L. infantum</i> | 67   | 432  | 498  |
| LinJ22_V3.0390 | <i>L. infantum</i> | 40   | 1    | 40   |
| LinJ22_V3.0390 | <i>L. infantum</i> | 61   | 88   | 148  |
| LinJ22_V3.0390 | <i>L. infantum</i> | 90   | 180  | 269  |
| LinJ22_V3.0390 | <i>L. infantum</i> | 75   | 326  | 400  |
| LinJ22_V3.0390 | <i>L. infantum</i> | 55   | 522  | 576  |
| LinJ22_V3.0400 | <i>L. infantum</i> | 59   | 48   | 106  |
| LinJ22_V3.0400 | <i>L. infantum</i> | 155  | 131  | 285  |
| LinJ22_V3.0400 | <i>L. infantum</i> | 64   | 303  | 366  |
| LinJ22_V3.0400 | <i>L. infantum</i> | 78   | 499  | 576  |
| LinJ22_V3.0400 | <i>L. infantum</i> | 130  | 606  | 735  |

|                |                    |     |      |      |
|----------------|--------------------|-----|------|------|
| LinJ22_V3.0400 | <i>L. infantum</i> | 67  | 1055 | 1121 |
| LinJ22_V3.0420 | <i>L. infantum</i> | 56  | 90   | 145  |
| LinJ22_V3.0420 | <i>L. infantum</i> | 154 | 236  | 389  |
| LinJ22_V3.0420 | <i>L. infantum</i> | 61  | 507  | 567  |
| LinJ22_V3.0420 | <i>L. infantum</i> | 134 | 698  | 831  |
| LinJ22_V3.0430 | <i>L. infantum</i> | 98  | 228  | 325  |
| LinJ22_V3.0430 | <i>L. infantum</i> | 237 | 487  | 723  |
| LinJ22_V3.0440 | <i>L. infantum</i> | 52  | 307  | 358  |
| LinJ22_V3.0470 | <i>L. infantum</i> | 56  | 269  | 324  |
| LinJ22_V3.0470 | <i>L. infantum</i> | 77  | 396  | 472  |
| LinJ22_V3.0480 | <i>L. infantum</i> | 105 | 1    | 105  |
| LinJ22_V3.0480 | <i>L. infantum</i> | 57  | 204  | 260  |
| LinJ22_V3.0490 | <i>L. infantum</i> | 129 | 1    | 129  |
| LinJ22_V3.0500 | <i>L. infantum</i> | 285 | 1    | 285  |
| LinJ22_V3.0500 | <i>L. infantum</i> | 382 | 323  | 704  |
| LinJ22_V3.0500 | <i>L. infantum</i> | 181 | 738  | 918  |
| LinJ22_V3.0500 | <i>L. infantum</i> | 213 | 933  | 1145 |
| LinJ22_V3.0510 | <i>L. infantum</i> | 197 | 41   | 237  |
| LinJ22_V3.0510 | <i>L. infantum</i> | 60  | 528  | 587  |
| LinJ22_V3.0510 | <i>L. infantum</i> | 52  | 1286 | 1337 |
| LinJ22_V3.0510 | <i>L. infantum</i> | 41  | 1528 | 1568 |
| LinJ22_V3.0530 | <i>L. infantum</i> | 138 | 18   | 155  |
| LinJ22_V3.0530 | <i>L. infantum</i> | 80  | 159  | 238  |
| LinJ22_V3.0530 | <i>L. infantum</i> | 70  | 281  | 350  |
| LinJ22_V3.0530 | <i>L. infantum</i> | 40  | 519  | 558  |
| LinJ22_V3.0530 | <i>L. infantum</i> | 46  | 579  | 624  |
| LinJ22_V3.0530 | <i>L. infantum</i> | 101 | 679  | 779  |
| LinJ22_V3.0540 | <i>L. infantum</i> | 42  | 116  | 157  |
| LinJ22_V3.0560 | <i>L. infantum</i> | 105 | 111  | 215  |
| LinJ22_V3.0560 | <i>L. infantum</i> | 125 | 319  | 443  |
| LinJ22_V3.0560 | <i>L. infantum</i> | 48  | 466  | 513  |
| LinJ22_V3.0560 | <i>L. infantum</i> | 78  | 538  | 615  |
| LinJ22_V3.0570 | <i>L. infantum</i> | 76  | 10   | 85   |
| LinJ22_V3.0570 | <i>L. infantum</i> | 154 | 97   | 250  |
| LinJ22_V3.0570 | <i>L. infantum</i> | 76  | 270  | 345  |
| LinJ22_V3.0570 | <i>L. infantum</i> | 85  | 350  | 434  |
| LinJ22_V3.0570 | <i>L. infantum</i> | 220 | 446  | 665  |
| LinJ22_V3.0570 | <i>L. infantum</i> | 275 | 856  | 1130 |
| LinJ22_V3.0590 | <i>L. infantum</i> | 43  | 247  | 289  |
| LinJ22_V3.0600 | <i>L. infantum</i> | 42  | 248  | 289  |
| LinJ22_V3.0610 | <i>L. infantum</i> | 41  | 226  | 266  |
| LinJ22_V3.0620 | <i>L. infantum</i> | 124 | 58   | 181  |
| LinJ22_V3.0630 | <i>L. infantum</i> | 87  | 285  | 371  |
| LinJ22_V3.0640 | <i>L. infantum</i> | 53  | 1    | 53   |
| LinJ22_V3.0640 | <i>L. infantum</i> | 61  | 137  | 197  |
| LinJ22_V3.0640 | <i>L. infantum</i> | 148 | 464  | 611  |
| LinJ22_V3.0640 | <i>L. infantum</i> | 207 | 626  | 832  |

|                |                    |     |      |      |
|----------------|--------------------|-----|------|------|
| LinJ22_V3.0640 | <i>L. infantum</i> | 56  | 836  | 891  |
| LinJ22_V3.0660 | <i>L. infantum</i> | 799 | 1    | 799  |
| LinJ22_V3.0660 | <i>L. infantum</i> | 90  | 819  | 908  |
| LinJ22_V3.0660 | <i>L. infantum</i> | 238 | 912  | 1149 |
| LinJ22_V3.0660 | <i>L. infantum</i> | 296 | 1193 | 1488 |
| LinJ22_V3.0670 | <i>L. infantum</i> | 463 | 25   | 487  |
| LinJ22_V3.0680 | <i>L. infantum</i> | 105 | 111  | 215  |
| LinJ22_V3.0680 | <i>L. infantum</i> | 126 | 319  | 444  |
| LinJ22_V3.0680 | <i>L. infantum</i> | 49  | 466  | 514  |
| LinJ22_V3.0680 | <i>L. infantum</i> | 86  | 530  | 615  |
| LinJ22_V3.0690 | <i>L. infantum</i> | 101 | 247  | 347  |
| LinJ22_V3.0690 | <i>L. infantum</i> | 48  | 383  | 430  |
| LinJ22_V3.0690 | <i>L. infantum</i> | 45  | 725  | 769  |
| LinJ22_V3.0690 | <i>L. infantum</i> | 49  | 854  | 902  |
| LinJ22_V3.0710 | <i>L. infantum</i> | 110 | 67   | 176  |
| LinJ22_V3.0710 | <i>L. infantum</i> | 138 | 195  | 332  |
| LinJ22_V3.0710 | <i>L. infantum</i> | 67  | 389  | 455  |
| LinJ22_V3.0710 | <i>L. infantum</i> | 42  | 487  | 528  |
| LinJ22_V3.0710 | <i>L. infantum</i> | 100 | 544  | 643  |
| LinJ22_V3.0720 | <i>L. infantum</i> | 94  | 1    | 94   |
| LinJ22_V3.0730 | <i>L. infantum</i> | 220 | 1    | 220  |
| LinJ22_V3.0730 | <i>L. infantum</i> | 59  | 325  | 383  |
| LinJ22_V3.0730 | <i>L. infantum</i> | 125 | 598  | 722  |
| LinJ22_V3.0730 | <i>L. infantum</i> | 68  | 748  | 815  |
| LinJ22_V3.0740 | <i>L. infantum</i> | 175 | 1    | 175  |
| LinJ22_V3.0740 | <i>L. infantum</i> | 42  | 213  | 254  |
| LinJ22_V3.0740 | <i>L. infantum</i> | 41  | 283  | 323  |
| LinJ22_V3.0750 | <i>L. infantum</i> | 107 | 28   | 134  |
| LinJ22_V3.0750 | <i>L. infantum</i> | 91  | 367  | 457  |
| LinJ22_V3.0750 | <i>L. infantum</i> | 59  | 736  | 794  |
| LinJ22_V3.0760 | <i>L. infantum</i> | 51  | 460  | 510  |
| LinJ22_V3.0760 | <i>L. infantum</i> | 91  | 595  | 685  |
| LinJ22_V3.0760 | <i>L. infantum</i> | 91  | 595  | 685  |
| LinJ22_V3.0780 | <i>L. infantum</i> | 54  | 20   | 73   |
| LinJ22_V3.0780 | <i>L. infantum</i> | 88  | 354  | 441  |
| LinJ22_V3.0780 | <i>L. infantum</i> | 209 | 485  | 693  |
| LinJ22_V3.0780 | <i>L. infantum</i> | 204 | 695  | 898  |
| LinJ22_V3.0780 | <i>L. infantum</i> | 341 | 915  | 1255 |
| LinJ22_V3.0790 | <i>L. infantum</i> | 40  | 1    | 40   |
| LinJ22_V3.0790 | <i>L. infantum</i> | 195 | 112  | 306  |
| LinJ22_V3.0790 | <i>L. infantum</i> | 453 | 383  | 835  |
| LinJ22_V3.0800 | <i>L. infantum</i> | 72  | 1    | 72   |
| LinJ22_V3.0800 | <i>L. infantum</i> | 53  | 398  | 450  |
| LinJ22_V3.0800 | <i>L. infantum</i> | 44  | 502  | 545  |
| LinJ22_V3.0800 | <i>L. infantum</i> | 90  | 569  | 658  |
| LinJ22_V3.0810 | <i>L. infantum</i> | 45  | 84   | 128  |
| LinJ22_V3.0810 | <i>L. infantum</i> | 46  | 141  | 186  |

|                |                    |     |      |      |
|----------------|--------------------|-----|------|------|
| LinJ22_V3.0810 | <i>L. infantum</i> | 92  | 676  | 767  |
| LinJ22_V3.0810 | <i>L. infantum</i> | 57  | 820  | 876  |
| LinJ22_V3.0810 | <i>L. infantum</i> | 78  | 1138 | 1215 |
| LinJ22_V3.0820 | <i>L. infantum</i> | 45  | 43   | 87   |
| LinJ22_V3.0820 | <i>L. infantum</i> | 198 | 94   | 291  |
| LinJ22_V3.0820 | <i>L. infantum</i> | 61  | 377  | 437  |
| LinJ22_V3.0830 | <i>L. infantum</i> | 83  | 501  | 583  |
| LinJ22_V3.0850 | <i>L. infantum</i> | 46  | 1    | 46   |
| LinJ22_V3.0850 | <i>L. infantum</i> | 253 | 116  | 368  |
| LinJ22_V3.0850 | <i>L. infantum</i> | 96  | 515  | 610  |
| LinJ22_V3.0850 | <i>L. infantum</i> | 96  | 857  | 952  |
| LinJ22_V3.0860 | <i>L. infantum</i> | 69  | 120  | 188  |
| LinJ22_V3.0860 | <i>L. infantum</i> | 223 | 238  | 460  |
| LinJ22_V3.0860 | <i>L. infantum</i> | 86  | 593  | 678  |
| LinJ22_V3.0870 | <i>L. infantum</i> | 78  | 25   | 102  |
| LinJ22_V3.0870 | <i>L. infantum</i> | 78  | 295  | 372  |
| LinJ22_V3.0870 | <i>L. infantum</i> | 158 | 677  | 834  |
| LinJ22_V3.0870 | <i>L. infantum</i> | 96  | 870  | 965  |
| LinJ22_V3.0890 | <i>L. infantum</i> | 107 | 1    | 107  |
| LinJ22_V3.0890 | <i>L. infantum</i> | 160 | 139  | 298  |
| LinJ22_V3.0890 | <i>L. infantum</i> | 197 | 304  | 500  |
| LinJ22_V3.0890 | <i>L. infantum</i> | 187 | 506  | 692  |
| LinJ22_V3.0890 | <i>L. infantum</i> | 75  | 716  | 790  |
| LinJ22_V3.0900 | <i>L. infantum</i> | 71  | 1    | 71   |
| LinJ22_V3.0900 | <i>L. infantum</i> | 62  | 134  | 195  |
| LinJ22_V3.0910 | <i>L. infantum</i> | 59  | 1    | 59   |
| LinJ22_V3.0910 | <i>L. infantum</i> | 48  | 172  | 219  |
| LinJ22_V3.0910 | <i>L. infantum</i> | 194 | 345  | 538  |
| LinJ22_V3.0930 | <i>L. infantum</i> | 72  | 114  | 185  |
| LinJ22_V3.0930 | <i>L. infantum</i> | 79  | 296  | 374  |
| LinJ22_V3.0930 | <i>L. infantum</i> | 89  | 1040 | 1128 |
| LinJ22_V3.0930 | <i>L. infantum</i> | 40  | 1157 | 1196 |
| LinJ22_V3.0930 | <i>L. infantum</i> | 61  | 1445 | 1505 |
| LinJ22_V3.0930 | <i>L. infantum</i> | 40  | 2263 | 2302 |
| LinJ22_V3.0930 | <i>L. infantum</i> | 91  | 3015 | 3105 |
| LinJ22_V3.0930 | <i>L. infantum</i> | 54  | 3739 | 3792 |
| LinJ22_V3.0930 | <i>L. infantum</i> | 101 | 3966 | 4066 |
| LinJ22_V3.0930 | <i>L. infantum</i> | 100 | 4656 | 4755 |
| LinJ22_V3.0930 | <i>L. infantum</i> | 46  | 5493 | 5538 |
| LinJ22_V3.0940 | <i>L. infantum</i> | 45  | 75   | 119  |
| LinJ22_V3.0970 | <i>L. infantum</i> | 59  | 1    | 59   |
| LinJ22_V3.0970 | <i>L. infantum</i> | 40  | 171  | 210  |
| LinJ22_V3.0970 | <i>L. infantum</i> | 42  | 213  | 254  |
| LinJ22_V3.0970 | <i>L. infantum</i> | 229 | 735  | 963  |
| LinJ22_V3.0970 | <i>L. infantum</i> | 45  | 968  | 1012 |
| LinJ22_V3.0980 | <i>L. infantum</i> | 45  | 1    | 45   |
| LinJ22_V3.0980 | <i>L. infantum</i> | 71  | 120  | 190  |

|                |                    |     |      |      |
|----------------|--------------------|-----|------|------|
| LinJ22_V3.0990 | <i>L. infantum</i> | 66  | 1    | 66   |
| LinJ22_V3.0990 | <i>L. infantum</i> | 117 | 182  | 298  |
| LinJ22_V3.0990 | <i>L. infantum</i> | 157 | 480  | 636  |
| LinJ22_V3.0990 | <i>L. infantum</i> | 285 | 666  | 950  |
| LinJ22_V3.1000 | <i>L. infantum</i> | 319 | 177  | 495  |
| LinJ22_V3.1020 | <i>L. infantum</i> | 55  | 1    | 55   |
| LinJ22_V3.1020 | <i>L. infantum</i> | 43  | 176  | 218  |
| LinJ22_V3.1020 | <i>L. infantum</i> | 43  | 176  | 218  |
| LinJ22_V3.1030 | <i>L. infantum</i> | 301 | 1    | 301  |
| LinJ22_V3.1030 | <i>L. infantum</i> | 56  | 380  | 435  |
| LinJ22_V3.1030 | <i>L. infantum</i> | 175 | 716  | 890  |
| LinJ22_V3.1030 | <i>L. infantum</i> | 48  | 999  | 1046 |
| LinJ22_V3.1030 | <i>L. infantum</i> | 137 | 1092 | 1228 |
| LinJ22_V3.1050 | <i>L. infantum</i> | 128 | 1    | 128  |
| LinJ22_V3.1050 | <i>L. infantum</i> | 95  | 264  | 358  |
| LinJ22_V3.1050 | <i>L. infantum</i> | 95  | 264  | 358  |
| LinJ22_V3.1060 | <i>L. infantum</i> | 62  | 1    | 62   |
| LinJ22_V3.1060 | <i>L. infantum</i> | 50  | 96   | 145  |
| LinJ22_V3.1060 | <i>L. infantum</i> | 42  | 630  | 671  |
| LinJ22_V3.1060 | <i>L. infantum</i> | 62  | 714  | 775  |
| LinJ22_V3.1070 | <i>L. infantum</i> | 84  | 248  | 331  |
| LinJ22_V3.1080 | <i>L. infantum</i> | 355 | 139  | 493  |
| LinJ22_V3.1080 | <i>L. infantum</i> | 52  | 514  | 565  |
| LinJ22_V3.1080 | <i>L. infantum</i> | 59  | 591  | 649  |
| LinJ22_V3.1080 | <i>L. infantum</i> | 163 | 696  | 858  |
| LinJ22_V3.1080 | <i>L. infantum</i> | 162 | 862  | 1023 |
| LinJ22_V3.1090 | <i>L. infantum</i> | 73  | 45   | 117  |
| LinJ22_V3.1090 | <i>L. infantum</i> | 60  | 272  | 331  |
| LinJ22_V3.1100 | <i>L. infantum</i> | 131 | 123  | 253  |
| LinJ22_V3.1110 | <i>L. infantum</i> | 77  | 1    | 77   |
| LinJ22_V3.1140 | <i>L. infantum</i> | 440 | 1    | 440  |
| LinJ22_V3.1140 | <i>L. infantum</i> | 115 | 471  | 585  |
| LinJ22_V3.1140 | <i>L. infantum</i> | 369 | 608  | 976  |
| LinJ22_V3.1140 | <i>L. infantum</i> | 44  | 986  | 1029 |
| LinJ22_V3.1140 | <i>L. infantum</i> | 106 | 1037 | 1142 |
| LinJ22_V3.1150 | <i>L. infantum</i> | 111 | 1    | 111  |
| LinJ22_V3.1150 | <i>L. infantum</i> | 78  | 214  | 291  |
| LinJ22_V3.1150 | <i>L. infantum</i> | 163 | 350  | 512  |
| LinJ22_V3.1150 | <i>L. infantum</i> | 50  | 542  | 591  |
| LinJ22_V3.1160 | <i>L. infantum</i> | 70  | 1    | 70   |
| LinJ22_V3.1160 | <i>L. infantum</i> | 59  | 138  | 196  |
| LinJ22_V3.1160 | <i>L. infantum</i> | 428 | 411  | 838  |
| LinJ22_V3.1160 | <i>L. infantum</i> | 67  | 902  | 968  |
| LinJ22_V3.1160 | <i>L. infantum</i> | 962 | 1072 | 2033 |
| LinJ22_V3.1180 | <i>L. infantum</i> | 172 | 1    | 172  |
| LinJ22_V3.1180 | <i>L. infantum</i> | 112 | 181  | 292  |
| LinJ22_V3.1180 | <i>L. infantum</i> | 570 | 294  | 863  |

|                |                    |     |      |      |
|----------------|--------------------|-----|------|------|
| LinJ22_V3.1200 | <i>L. infantum</i> | 141 | 254  | 394  |
| LinJ22_V3.1220 | <i>L. infantum</i> | 108 | 35   | 142  |
| LinJ22_V3.1220 | <i>L. infantum</i> | 244 | 180  | 423  |
| LinJ22_V3.1230 | <i>L. infantum</i> | 148 | 121  | 268  |
| LinJ22_V3.1240 | <i>L. infantum</i> | 67  | 1    | 67   |
| LinJ22_V3.1240 | <i>L. infantum</i> | 42  | 149  | 190  |
| LinJ22_V3.1240 | <i>L. infantum</i> | 42  | 149  | 190  |
| LinJ22_V3.1250 | <i>L. infantum</i> | 116 | 1    | 116  |
| LinJ22_V3.1260 | <i>L. infantum</i> | 56  | 94   | 149  |
| LinJ22_V3.1270 | <i>L. infantum</i> | 44  | 1    | 44   |
| LinJ22_V3.1290 | <i>L. infantum</i> | 54  | 1    | 54   |
| LinJ22_V3.1290 | <i>L. infantum</i> | 65  | 84   | 148  |
| LinJ22_V3.1290 | <i>L. infantum</i> | 64  | 402  | 465  |
| LinJ22_V3.1310 | <i>L. infantum</i> | 59  | 149  | 207  |
| LinJ22_V3.1320 | <i>L. infantum</i> | 121 | 157  | 277  |
| LinJ22_V3.1330 | <i>L. infantum</i> | 42  | 171  | 212  |
| LinJ22_V3.1350 | <i>L. infantum</i> | 65  | 55   | 119  |
| LinJ22_V3.1350 | <i>L. infantum</i> | 52  | 1036 | 1087 |
| LinJ22_V3.1350 | <i>L. infantum</i> | 52  | 1036 | 1087 |
| LinJ22_V3.1360 | <i>L. infantum</i> | 156 | 68   | 223  |
| LinJ22_V3.1370 | <i>L. infantum</i> | 108 | 126  | 233  |
| LinJ22_V3.1390 | <i>L. infantum</i> | 43  | 920  | 962  |
| LinJ22_V3.1400 | <i>L. infantum</i> | 54  | 49   | 102  |
| LinJ22_V3.1400 | <i>L. infantum</i> | 49  | 393  | 441  |
| LinJ22_V3.1400 | <i>L. infantum</i> | 49  | 393  | 441  |
| LinJ22_V3.1410 | <i>L. infantum</i> | 108 | 126  | 233  |
| LinJ22_V3.1420 | <i>L. infantum</i> | 143 | 14   | 156  |
| LinJ22_V3.1420 | <i>L. infantum</i> | 81  | 178  | 258  |
| LinJ22_V3.1420 | <i>L. infantum</i> | 79  | 285  | 363  |
| LinJ22_V3.1430 | <i>L. infantum</i> | 43  | 208  | 250  |
| LinJ22_V3.1430 | <i>L. infantum</i> | 53  | 311  | 363  |
| LinJ22_V3.1430 | <i>L. infantum</i> | 53  | 311  | 363  |
| LinJ22_V3.1440 | <i>L. infantum</i> | 93  | 1    | 93   |
| LinJ22_V3.1450 | <i>L. infantum</i> | 311 | 1    | 311  |
| LinJ22_V3.1450 | <i>L. infantum</i> | 123 | 563  | 685  |
| LinJ22_V3.1460 | <i>L. infantum</i> | 94  | 359  | 452  |
| LinJ22_V3.1470 | <i>L. infantum</i> | 51  | 1    | 51   |
| LinJ22_V3.1470 | <i>L. infantum</i> | 60  | 474  | 533  |
| LinJ22_V3.1470 | <i>L. infantum</i> | 48  | 1091 | 1138 |
| LinJ22_V3.1470 | <i>L. infantum</i> | 80  | 1414 | 1493 |
| LinJ22_V3.1480 | <i>L. infantum</i> | 53  | 286  | 338  |
| LinJ22_V3.1510 | <i>L. infantum</i> | 124 | 35   | 158  |
| LinJ22_V3.1510 | <i>L. infantum</i> | 56  | 496  | 551  |
| LinJ22_V3.1520 | <i>L. infantum</i> | 51  | 1    | 51   |
| LinJ22_V3.1530 | <i>L. infantum</i> | 48  | 1    | 48   |
| LinJ22_V3.1530 | <i>L. infantum</i> | 115 | 443  | 557  |
| LinJ22_V3.1530 | <i>L. infantum</i> | 115 | 443  | 557  |

|                |                    |     |      |      |
|----------------|--------------------|-----|------|------|
| LinJ22_V3.1550 | <i>L. infantum</i> | 254 | 103  | 356  |
| LinJ22_V3.1550 | <i>L. infantum</i> | 41  | 381  | 421  |
| LinJ22_V3.1560 | <i>L. infantum</i> | 51  | 72   | 122  |
| LinJ22_V3.1560 | <i>L. infantum</i> | 91  | 207  | 297  |
| LinJ22_V3.1560 | <i>L. infantum</i> | 91  | 207  | 297  |
| LinJ22_V3.1570 | <i>L. infantum</i> | 58  | 556  | 613  |
| LinJ23_V3.0020 | <i>L. infantum</i> | 76  | 182  | 257  |
| LinJ23_V3.0060 | <i>L. infantum</i> | 125 | 172  | 296  |
| LinJ23_V3.0070 | <i>L. infantum</i> | 151 | 23   | 173  |
| LinJ23_V3.0090 | <i>L. infantum</i> | 419 | 1    | 419  |
| LinJ23_V3.0100 | <i>L. infantum</i> | 133 | 208  | 340  |
| LinJ23_V3.0130 | <i>L. infantum</i> | 49  | 141  | 189  |
| LinJ23_V3.0130 | <i>L. infantum</i> | 69  | 1521 | 1589 |
| LinJ23_V3.0190 | <i>L. infantum</i> | 77  | 85   | 161  |
| LinJ23_V3.0210 | <i>L. infantum</i> | 101 | 25   | 125  |
| LinJ23_V3.0230 | <i>L. infantum</i> | 42  | 1    | 42   |
| LinJ23_V3.0230 | <i>L. infantum</i> | 57  | 609  | 665  |
| LinJ23_V3.0230 | <i>L. infantum</i> | 67  | 874  | 940  |
| LinJ23_V3.0240 | <i>L. infantum</i> | 51  | 1    | 51   |
| LinJ23_V3.0240 | <i>L. infantum</i> | 57  | 181  | 237  |
| LinJ23_V3.0240 | <i>L. infantum</i> | 57  | 617  | 673  |
| LinJ23_V3.0240 | <i>L. infantum</i> | 57  | 875  | 931  |
| LinJ23_V3.0250 | <i>L. infantum</i> | 98  | 1    | 98   |
| LinJ23_V3.0260 | <i>L. infantum</i> | 131 | 1    | 131  |
| LinJ23_V3.0290 | <i>L. infantum</i> | 44  | 626  | 669  |
| LinJ23_V3.0290 | <i>L. infantum</i> | 71  | 881  | 951  |
| LinJ23_V3.0320 | <i>L. infantum</i> | 195 | 1    | 195  |
| LinJ23_V3.0320 | <i>L. infantum</i> | 41  | 237  | 277  |
| LinJ23_V3.0320 | <i>L. infantum</i> | 141 | 295  | 435  |
| LinJ23_V3.0320 | <i>L. infantum</i> | 110 | 481  | 590  |
| LinJ23_V3.0320 | <i>L. infantum</i> | 117 | 606  | 722  |
| LinJ23_V3.0320 | <i>L. infantum</i> | 52  | 763  | 814  |
| LinJ23_V3.0320 | <i>L. infantum</i> | 64  | 1039 | 1102 |
| LinJ23_V3.0340 | <i>L. infantum</i> | 64  | 1    | 64   |
| LinJ23_V3.0350 | <i>L. infantum</i> | 40  | 1    | 40   |
| LinJ23_V3.0350 | <i>L. infantum</i> | 72  | 128  | 199  |
| LinJ23_V3.0350 | <i>L. infantum</i> | 61  | 282  | 342  |
| LinJ23_V3.0350 | <i>L. infantum</i> | 44  | 442  | 485  |
| LinJ23_V3.0350 | <i>L. infantum</i> | 72  | 685  | 756  |
| LinJ23_V3.0350 | <i>L. infantum</i> | 86  | 868  | 953  |
| LinJ23_V3.0360 | <i>L. infantum</i> | 41  | 1    | 41   |
| LinJ23_V3.0360 | <i>L. infantum</i> | 44  | 76   | 119  |
| LinJ23_V3.0360 | <i>L. infantum</i> | 65  | 145  | 209  |
| LinJ23_V3.0380 | <i>L. infantum</i> | 98  | 1    | 98   |
| LinJ23_V3.0390 | <i>L. infantum</i> | 56  | 1    | 56   |
| LinJ23_V3.0390 | <i>L. infantum</i> | 112 | 183  | 294  |
| LinJ23_V3.0400 | <i>L. infantum</i> | 82  | 92   | 173  |



|                |                    |     |      |      |
|----------------|--------------------|-----|------|------|
| LinJ23_V3.0430 | <i>L. infantum</i> | 82  | 479  | 560  |
| LinJ23_V3.0430 | <i>L. infantum</i> | 69  | 876  | 944  |
| LinJ23_V3.0430 | <i>L. infantum</i> | 69  | 876  | 944  |
| LinJ23_V3.0440 | <i>L. infantum</i> | 146 | 39   | 184  |
| LinJ23_V3.0440 | <i>L. infantum</i> | 70  | 205  | 274  |
| LinJ23_V3.0440 | <i>L. infantum</i> | 66  | 332  | 397  |
| LinJ23_V3.0440 | <i>L. infantum</i> | 46  | 459  | 504  |
| LinJ23_V3.0440 | <i>L. infantum</i> | 54  | 584  | 637  |
| LinJ23_V3.0440 | <i>L. infantum</i> | 181 | 670  | 850  |
| LinJ23_V3.0440 | <i>L. infantum</i> | 45  | 908  | 952  |
| LinJ23_V3.0440 | <i>L. infantum</i> | 55  | 1196 | 1250 |
| LinJ23_V3.0440 | <i>L. infantum</i> | 226 | 1267 | 1492 |
| LinJ23_V3.0440 | <i>L. infantum</i> | 44  | 1535 | 1578 |
| LinJ23_V3.0440 | <i>L. infantum</i> | 95  | 1738 | 1832 |
| LinJ23_V3.0440 | <i>L. infantum</i> | 82  | 1902 | 1983 |
| LinJ23_V3.0450 | <i>L. infantum</i> | 349 | 1    | 349  |
| LinJ23_V3.0450 | <i>L. infantum</i> | 103 | 485  | 587  |
| LinJ23_V3.0450 | <i>L. infantum</i> | 52  | 804  | 855  |
| LinJ23_V3.0450 | <i>L. infantum</i> | 75  | 1353 | 1427 |
| LinJ23_V3.0460 | <i>L. infantum</i> | 68  | 18   | 85   |
| LinJ23_V3.0480 | <i>L. infantum</i> | 44  | 149  | 192  |
| LinJ23_V3.0500 | <i>L. infantum</i> | 73  | 1    | 73   |
| LinJ23_V3.0510 | <i>L. infantum</i> | 174 | 1    | 174  |
| LinJ23_V3.0510 | <i>L. infantum</i> | 129 | 221  | 349  |
| LinJ23_V3.0520 | <i>L. infantum</i> | 653 | 1    | 653  |
| LinJ23_V3.0520 | <i>L. infantum</i> | 143 | 664  | 806  |
| LinJ23_V3.0520 | <i>L. infantum</i> | 74  | 839  | 912  |
| LinJ23_V3.0520 | <i>L. infantum</i> | 129 | 952  | 1080 |
| LinJ23_V3.0520 | <i>L. infantum</i> | 104 | 1104 | 1207 |
| LinJ23_V3.0520 | <i>L. infantum</i> | 47  | 1371 | 1417 |
| LinJ23_V3.0530 | <i>L. infantum</i> | 82  | 1    | 82   |
| LinJ23_V3.0530 | <i>L. infantum</i> | 46  | 156  | 201  |
| LinJ23_V3.0570 | <i>L. infantum</i> | 68  | 218  | 285  |
| LinJ23_V3.0580 | <i>L. infantum</i> | 60  | 1    | 60   |
| LinJ23_V3.0590 | <i>L. infantum</i> | 97  | 87   | 183  |
| LinJ23_V3.0600 | <i>L. infantum</i> | 40  | 99   | 138  |
| LinJ23_V3.0600 | <i>L. infantum</i> | 93  | 265  | 357  |
| LinJ23_V3.0600 | <i>L. infantum</i> | 50  | 474  | 523  |
| LinJ23_V3.0600 | <i>L. infantum</i> | 44  | 584  | 627  |
| LinJ23_V3.0600 | <i>L. infantum</i> | 94  | 760  | 853  |
| LinJ23_V3.0600 | <i>L. infantum</i> | 135 | 934  | 1068 |
| LinJ23_V3.0610 | <i>L. infantum</i> | 47  | 146  | 192  |
| LinJ23_V3.0610 | <i>L. infantum</i> | 69  | 282  | 350  |
| LinJ23_V3.0610 | <i>L. infantum</i> | 333 | 432  | 764  |
| LinJ23_V3.0620 | <i>L. infantum</i> | 70  | 234  | 303  |
| LinJ23_V3.0640 | <i>L. infantum</i> | 196 | 243  | 438  |
| LinJ23_V3.0650 | <i>L. infantum</i> | 155 | 95   | 249  |

|                |                    |     |      |      |
|----------------|--------------------|-----|------|------|
| LinJ23_V3.0660 | <i>L. infantum</i> | 45  | 223  | 267  |
| LinJ23_V3.0660 | <i>L. infantum</i> | 63  | 539  | 601  |
| LinJ23_V3.0660 | <i>L. infantum</i> | 63  | 539  | 601  |
| LinJ23_V3.0670 | <i>L. infantum</i> | 67  | 91   | 157  |
| LinJ23_V3.0670 | <i>L. infantum</i> | 96  | 176  | 271  |
| LinJ23_V3.0670 | <i>L. infantum</i> | 136 | 286  | 421  |
| LinJ23_V3.0670 | <i>L. infantum</i> | 46  | 437  | 482  |
| LinJ23_V3.0670 | <i>L. infantum</i> | 74  | 512  | 585  |
| LinJ23_V3.0670 | <i>L. infantum</i> | 57  | 677  | 733  |
| LinJ23_V3.0670 | <i>L. infantum</i> | 96  | 792  | 887  |
| LinJ23_V3.0670 | <i>L. infantum</i> | 85  | 943  | 1027 |
| LinJ23_V3.0670 | <i>L. infantum</i> | 42  | 1230 | 1271 |
| LinJ23_V3.0670 | <i>L. infantum</i> | 51  | 1536 | 1586 |
| LinJ23_V3.0670 | <i>L. infantum</i> | 68  | 1715 | 1782 |
| LinJ23_V3.0670 | <i>L. infantum</i> | 121 | 2099 | 2219 |
| LinJ23_V3.0670 | <i>L. infantum</i> | 137 | 2221 | 2357 |
| LinJ23_V3.0670 | <i>L. infantum</i> | 983 | 2361 | 3343 |
| LinJ23_V3.0690 | <i>L. infantum</i> | 57  | 210  | 266  |
| LinJ23_V3.0710 | <i>L. infantum</i> | 48  | 764  | 811  |
| LinJ23_V3.0720 | <i>L. infantum</i> | 51  | 402  | 452  |
| LinJ23_V3.0720 | <i>L. infantum</i> | 173 | 484  | 656  |
| LinJ23_V3.0720 | <i>L. infantum</i> | 173 | 484  | 656  |
| LinJ23_V3.0730 | <i>L. infantum</i> | 94  | 1    | 94   |
| LinJ23_V3.0730 | <i>L. infantum</i> | 61  | 171  | 231  |
| LinJ23_V3.0730 | <i>L. infantum</i> | 192 | 274  | 465  |
| LinJ23_V3.0730 | <i>L. infantum</i> | 52  | 498  | 549  |
| LinJ23_V3.0730 | <i>L. infantum</i> | 63  | 727  | 789  |
| LinJ23_V3.0730 | <i>L. infantum</i> | 122 | 828  | 949  |
| LinJ23_V3.0750 | <i>L. infantum</i> | 117 | 1    | 117  |
| LinJ23_V3.0750 | <i>L. infantum</i> | 95  | 212  | 306  |
| LinJ23_V3.0750 | <i>L. infantum</i> | 49  | 688  | 736  |
| LinJ23_V3.0750 | <i>L. infantum</i> | 117 | 768  | 884  |
| LinJ23_V3.0750 | <i>L. infantum</i> | 88  | 920  | 1007 |
| LinJ23_V3.0760 | <i>L. infantum</i> | 321 | 90   | 410  |
| LinJ23_V3.0770 | <i>L. infantum</i> | 162 | 100  | 261  |
| LinJ23_V3.0780 | <i>L. infantum</i> | 98  | 183  | 280  |
| LinJ23_V3.0790 | <i>L. infantum</i> | 88  | 1    | 88   |
| LinJ23_V3.0790 | <i>L. infantum</i> | 216 | 465  | 680  |
| LinJ23_V3.0800 | <i>L. infantum</i> | 155 | 1    | 155  |
| LinJ23_V3.0800 | <i>L. infantum</i> | 159 | 191  | 349  |
| LinJ23_V3.0800 | <i>L. infantum</i> | 180 | 430  | 609  |
| LinJ23_V3.0800 | <i>L. infantum</i> | 71  | 1154 | 1224 |
| LinJ23_V3.0810 | <i>L. infantum</i> | 178 | 35   | 212  |
| LinJ23_V3.0810 | <i>L. infantum</i> | 40  | 517  | 556  |
| LinJ23_V3.0820 | <i>L. infantum</i> | 60  | 35   | 94   |
| LinJ23_V3.0830 | <i>L. infantum</i> | 69  | 1    | 69   |
| LinJ23_V3.0830 | <i>L. infantum</i> | 48  | 182  | 229  |

|                |                    |     |      |      |
|----------------|--------------------|-----|------|------|
| LinJ23_V3.0830 | <i>L. infantum</i> | 50  | 249  | 298  |
| LinJ23_V3.0830 | <i>L. infantum</i> | 131 | 382  | 512  |
| LinJ23_V3.0830 | <i>L. infantum</i> | 129 | 665  | 793  |
| LinJ23_V3.0830 | <i>L. infantum</i> | 57  | 800  | 856  |
| LinJ23_V3.0850 | <i>L. infantum</i> | 257 | 1    | 257  |
| LinJ23_V3.0850 | <i>L. infantum</i> | 63  | 622  | 684  |
| LinJ23_V3.0880 | <i>L. infantum</i> | 50  | 1    | 50   |
| LinJ23_V3.0890 | <i>L. infantum</i> | 55  | 1    | 55   |
| LinJ23_V3.0890 | <i>L. infantum</i> | 48  | 83   | 130  |
| LinJ23_V3.0890 | <i>L. infantum</i> | 75  | 132  | 206  |
| LinJ23_V3.0890 | <i>L. infantum</i> | 279 | 284  | 562  |
| LinJ23_V3.0900 | <i>L. infantum</i> | 47  | 1    | 47   |
| LinJ23_V3.0900 | <i>L. infantum</i> | 71  | 58   | 128  |
| LinJ23_V3.0900 | <i>L. infantum</i> | 280 | 201  | 480  |
| LinJ23_V3.0900 | <i>L. infantum</i> | 111 | 489  | 599  |
| LinJ23_V3.0910 | <i>L. infantum</i> | 135 | 158  | 292  |
| LinJ23_V3.0910 | <i>L. infantum</i> | 50  | 370  | 419  |
| LinJ23_V3.0910 | <i>L. infantum</i> | 57  | 502  | 558  |
| LinJ23_V3.0920 | <i>L. infantum</i> | 116 | 218  | 333  |
| LinJ23_V3.0920 | <i>L. infantum</i> | 40  | 445  | 484  |
| LinJ23_V3.0920 | <i>L. infantum</i> | 45  | 794  | 838  |
| LinJ23_V3.0940 | <i>L. infantum</i> | 279 | 13   | 291  |
| LinJ23_V3.0940 | <i>L. infantum</i> | 199 | 322  | 520  |
| LinJ23_V3.0940 | <i>L. infantum</i> | 206 | 564  | 769  |
| LinJ23_V3.0940 | <i>L. infantum</i> | 49  | 787  | 835  |
| LinJ23_V3.0940 | <i>L. infantum</i> | 191 | 913  | 1103 |
| LinJ23_V3.0940 | <i>L. infantum</i> | 57  | 1257 | 1313 |
| LinJ23_V3.0950 | <i>L. infantum</i> | 162 | 93   | 254  |
| LinJ23_V3.0950 | <i>L. infantum</i> | 143 | 530  | 672  |
| LinJ23_V3.0950 | <i>L. infantum</i> | 172 | 701  | 872  |
| LinJ23_V3.0960 | <i>L. infantum</i> | 77  | 47   | 123  |
| LinJ23_V3.0960 | <i>L. infantum</i> | 123 | 164  | 286  |
| LinJ23_V3.0960 | <i>L. infantum</i> | 68  | 397  | 464  |
| LinJ23_V3.0960 | <i>L. infantum</i> | 78  | 494  | 571  |
| LinJ23_V3.0960 | <i>L. infantum</i> | 103 | 755  | 857  |
| LinJ23_V3.0970 | <i>L. infantum</i> | 243 | 1    | 243  |
| LinJ23_V3.0970 | <i>L. infantum</i> | 44  | 333  | 376  |
| LinJ23_V3.0990 | <i>L. infantum</i> | 119 | 57   | 175  |
| LinJ23_V3.1000 | <i>L. infantum</i> | 134 | 561  | 694  |
| LinJ23_V3.1000 | <i>L. infantum</i> | 44  | 808  | 851  |
| LinJ23_V3.1000 | <i>L. infantum</i> | 68  | 1093 | 1160 |
| LinJ23_V3.1000 | <i>L. infantum</i> | 49  | 1176 | 1224 |
| LinJ23_V3.1010 | <i>L. infantum</i> | 40  | 113  | 152  |
| LinJ23_V3.1040 | <i>L. infantum</i> | 69  | 92   | 160  |
| LinJ23_V3.1040 | <i>L. infantum</i> | 82  | 243  | 324  |
| LinJ23_V3.1040 | <i>L. infantum</i> | 109 | 467  | 575  |
| LinJ23_V3.1040 | <i>L. infantum</i> | 100 | 677  | 776  |

|                |                    |     |      |      |
|----------------|--------------------|-----|------|------|
| LinJ23_V3.1080 | <i>L. infantum</i> | 54  | 1    | 54   |
| LinJ23_V3.1090 | <i>L. infantum</i> | 67  | 1    | 67   |
| LinJ23_V3.1090 | <i>L. infantum</i> | 159 | 133  | 291  |
| LinJ23_V3.1090 | <i>L. infantum</i> | 161 | 361  | 521  |
| LinJ23_V3.1090 | <i>L. infantum</i> | 40  | 560  | 599  |
| LinJ23_V3.1090 | <i>L. infantum</i> | 452 | 646  | 1097 |
| LinJ23_V3.1090 | <i>L. infantum</i> | 206 | 1122 | 1327 |
| LinJ23_V3.1090 | <i>L. infantum</i> | 197 | 1360 | 1556 |
| LinJ23_V3.1090 | <i>L. infantum</i> | 70  | 1580 | 1649 |
| LinJ23_V3.1090 | <i>L. infantum</i> | 64  | 1698 | 1761 |
| LinJ23_V3.1090 | <i>L. infantum</i> | 110 | 1937 | 2046 |
| LinJ23_V3.1090 | <i>L. infantum</i> | 65  | 2077 | 2141 |
| LinJ23_V3.1090 | <i>L. infantum</i> | 68  | 2214 | 2281 |
| LinJ23_V3.1090 | <i>L. infantum</i> | 41  | 2388 | 2428 |
| LinJ23_V3.1090 | <i>L. infantum</i> | 257 | 2481 | 2737 |
| LinJ23_V3.1090 | <i>L. infantum</i> | 106 | 2772 | 2877 |
| LinJ23_V3.1120 | <i>L. infantum</i> | 50  | 183  | 232  |
| LinJ23_V3.1130 | <i>L. infantum</i> | 120 | 208  | 327  |
| LinJ23_V3.1140 | <i>L. infantum</i> | 97  | 123  | 219  |
| LinJ23_V3.1140 | <i>L. infantum</i> | 92  | 297  | 388  |
| LinJ23_V3.1150 | <i>L. infantum</i> | 61  | 149  | 209  |
| LinJ23_V3.1150 | <i>L. infantum</i> | 50  | 257  | 306  |
| LinJ23_V3.1150 | <i>L. infantum</i> | 50  | 257  | 306  |
| LinJ23_V3.1160 | <i>L. infantum</i> | 58  | 140  | 197  |
| LinJ23_V3.1160 | <i>L. infantum</i> | 143 | 279  | 421  |
| LinJ23_V3.1160 | <i>L. infantum</i> | 251 | 428  | 678  |
| LinJ23_V3.1160 | <i>L. infantum</i> | 70  | 680  | 749  |
| LinJ23_V3.1170 | <i>L. infantum</i> | 74  | 121  | 194  |
| LinJ23_V3.1180 | <i>L. infantum</i> | 48  | 76   | 123  |
| LinJ23_V3.1180 | <i>L. infantum</i> | 58  | 220  | 277  |
| LinJ23_V3.1180 | <i>L. infantum</i> | 49  | 309  | 357  |
| LinJ23_V3.1180 | <i>L. infantum</i> | 40  | 514  | 553  |
| LinJ23_V3.1180 | <i>L. infantum</i> | 46  | 625  | 670  |
| LinJ23_V3.1180 | <i>L. infantum</i> | 304 | 803  | 1106 |
| LinJ23_V3.1190 | <i>L. infantum</i> | 131 | 1    | 131  |
| LinJ23_V3.1220 | <i>L. infantum</i> | 247 | 1    | 247  |
| LinJ23_V3.1240 | <i>L. infantum</i> | 75  | 1    | 75   |
| LinJ23_V3.1250 | <i>L. infantum</i> | 61  | 202  | 262  |
| LinJ23_V3.1250 | <i>L. infantum</i> | 50  | 270  | 319  |
| LinJ23_V3.1250 | <i>L. infantum</i> | 237 | 321  | 557  |
| LinJ23_V3.1260 | <i>L. infantum</i> | 205 | 7    | 211  |
| LinJ23_V3.1260 | <i>L. infantum</i> | 107 | 255  | 361  |
| LinJ23_V3.1260 | <i>L. infantum</i> | 43  | 365  | 407  |
| LinJ23_V3.1260 | <i>L. infantum</i> | 77  | 421  | 497  |
| LinJ23_V3.1260 | <i>L. infantum</i> | 51  | 525  | 575  |
| LinJ23_V3.1260 | <i>L. infantum</i> | 59  | 634  | 692  |
| LinJ23_V3.1270 | <i>L. infantum</i> | 49  | 401  | 449  |

|                |                    |     |      |      |
|----------------|--------------------|-----|------|------|
| LinJ23_V3.1280 | <i>L. infantum</i> | 51  | 1    | 51   |
| LinJ23_V3.1280 | <i>L. infantum</i> | 92  | 62   | 153  |
| LinJ23_V3.1280 | <i>L. infantum</i> | 55  | 297  | 351  |
| LinJ23_V3.1290 | <i>L. infantum</i> | 152 | 242  | 393  |
| LinJ23_V3.1300 | <i>L. infantum</i> | 56  | 1    | 56   |
| LinJ23_V3.1300 | <i>L. infantum</i> | 76  | 139  | 214  |
| LinJ23_V3.1300 | <i>L. infantum</i> | 63  | 471  | 533  |
| LinJ23_V3.1320 | <i>L. infantum</i> | 76  | 502  | 577  |
| LinJ23_V3.1350 | <i>L. infantum</i> | 138 | 177  | 314  |
| LinJ23_V3.1350 | <i>L. infantum</i> | 73  | 341  | 413  |
| LinJ23_V3.1360 | <i>L. infantum</i> | 154 | 19   | 172  |
| LinJ23_V3.1360 | <i>L. infantum</i> | 205 | 207  | 411  |
| LinJ23_V3.1360 | <i>L. infantum</i> | 174 | 413  | 586  |
| LinJ23_V3.1360 | <i>L. infantum</i> | 53  | 644  | 696  |
| LinJ23_V3.1360 | <i>L. infantum</i> | 52  | 810  | 861  |
| LinJ23_V3.1360 | <i>L. infantum</i> | 468 | 882  | 1349 |
| LinJ23_V3.1370 | <i>L. infantum</i> | 113 | 1    | 113  |
| LinJ23_V3.1370 | <i>L. infantum</i> | 334 | 116  | 449  |
| LinJ23_V3.1370 | <i>L. infantum</i> | 48  | 498  | 545  |
| LinJ23_V3.1370 | <i>L. infantum</i> | 41  | 566  | 606  |
| LinJ23_V3.1380 | <i>L. infantum</i> | 78  | 1    | 78   |
| LinJ23_V3.1380 | <i>L. infantum</i> | 72  | 175  | 246  |
| LinJ23_V3.1380 | <i>L. infantum</i> | 87  | 249  | 335  |
| LinJ23_V3.1400 | <i>L. infantum</i> | 145 | 366  | 510  |
| LinJ23_V3.1430 | <i>L. infantum</i> | 42  | 451  | 492  |
| LinJ23_V3.1440 | <i>L. infantum</i> | 61  | 54   | 114  |
| LinJ23_V3.1480 | <i>L. infantum</i> | 141 | 58   | 198  |
| LinJ23_V3.1480 | <i>L. infantum</i> | 48  | 307  | 354  |
| LinJ23_V3.1480 | <i>L. infantum</i> | 268 | 449  | 716  |
| LinJ23_V3.1490 | <i>L. infantum</i> | 171 | 24   | 194  |
| LinJ23_V3.1490 | <i>L. infantum</i> | 204 | 235  | 438  |
| LinJ23_V3.1490 | <i>L. infantum</i> | 52  | 565  | 616  |
| LinJ23_V3.1490 | <i>L. infantum</i> | 44  | 648  | 691  |
| LinJ23_V3.1490 | <i>L. infantum</i> | 48  | 819  | 866  |
| LinJ23_V3.1490 | <i>L. infantum</i> | 190 | 935  | 1124 |
| LinJ23_V3.1490 | <i>L. infantum</i> | 87  | 1275 | 1361 |
| LinJ23_V3.1500 | <i>L. infantum</i> | 68  | 91   | 158  |
| LinJ23_V3.1500 | <i>L. infantum</i> | 134 | 1120 | 1253 |
| LinJ23_V3.1500 | <i>L. infantum</i> | 134 | 1120 | 1253 |
| LinJ23_V3.1510 | <i>L. infantum</i> | 269 | 1    | 269  |
| LinJ23_V3.1520 | <i>L. infantum</i> | 309 | 70   | 378  |
| LinJ23_V3.1530 | <i>L. infantum</i> | 80  | 283  | 362  |
| LinJ23_V3.1530 | <i>L. infantum</i> | 299 | 529  | 827  |
| LinJ23_V3.1530 | <i>L. infantum</i> | 184 | 832  | 1015 |
| LinJ23_V3.1540 | <i>L. infantum</i> | 78  | 1    | 78   |
| LinJ23_V3.1540 | <i>L. infantum</i> | 42  | 82   | 123  |
| LinJ23_V3.1540 | <i>L. infantum</i> | 47  | 301  | 347  |

|                |                    |     |      |      |
|----------------|--------------------|-----|------|------|
| LinJ23_V3.1540 | <i>L. infantum</i> | 215 | 405  | 619  |
| LinJ23_V3.1540 | <i>L. infantum</i> | 97  | 652  | 748  |
| LinJ23_V3.1540 | <i>L. infantum</i> | 46  | 758  | 803  |
| LinJ23_V3.1540 | <i>L. infantum</i> | 46  | 929  | 974  |
| LinJ23_V3.1540 | <i>L. infantum</i> | 46  | 1025 | 1070 |
| LinJ23_V3.1550 | <i>L. infantum</i> | 80  | 1    | 80   |
| LinJ23_V3.1550 | <i>L. infantum</i> | 473 | 91   | 563  |
| LinJ23_V3.1550 | <i>L. infantum</i> | 52  | 603  | 654  |
| LinJ23_V3.1570 | <i>L. infantum</i> | 89  | 62   | 150  |
| LinJ23_V3.1570 | <i>L. infantum</i> | 51  | 544  | 594  |
| LinJ23_V3.1570 | <i>L. infantum</i> | 108 | 3313 | 3420 |
| LinJ23_V3.1570 | <i>L. infantum</i> | 59  | 3526 | 3584 |
| LinJ23_V3.1570 | <i>L. infantum</i> | 76  | 3823 | 3898 |
| LinJ23_V3.1590 | <i>L. infantum</i> | 134 | 51   | 184  |
| LinJ23_V3.1590 | <i>L. infantum</i> | 72  | 348  | 419  |
| LinJ23_V3.1590 | <i>L. infantum</i> | 86  | 553  | 638  |
| LinJ23_V3.1590 | <i>L. infantum</i> | 62  | 670  | 731  |
| LinJ23_V3.1590 | <i>L. infantum</i> | 253 | 736  | 988  |
| LinJ23_V3.1590 | <i>L. infantum</i> | 208 | 1237 | 1444 |
| LinJ23_V3.1590 | <i>L. infantum</i> | 148 | 1473 | 1620 |
| LinJ23_V3.1590 | <i>L. infantum</i> | 64  | 1699 | 1762 |
| LinJ23_V3.1590 | <i>L. infantum</i> | 199 | 1913 | 2111 |
| LinJ23_V3.1590 | <i>L. infantum</i> | 153 | 2718 | 2870 |
| LinJ23_V3.1590 | <i>L. infantum</i> | 51  | 2922 | 2972 |
| LinJ23_V3.1600 | <i>L. infantum</i> | 148 | 93   | 240  |
| LinJ23_V3.1600 | <i>L. infantum</i> | 60  | 289  | 348  |
| LinJ23_V3.1610 | <i>L. infantum</i> | 165 | 1    | 165  |
| LinJ23_V3.1620 | <i>L. infantum</i> | 81  | 1    | 81   |
| LinJ23_V3.1620 | <i>L. infantum</i> | 155 | 261  | 415  |
| LinJ23_V3.1620 | <i>L. infantum</i> | 155 | 261  | 415  |
| LinJ23_V3.1630 | <i>L. infantum</i> | 54  | 1    | 54   |
| LinJ23_V3.1640 | <i>L. infantum</i> | 309 | 1    | 309  |
| LinJ23_V3.1640 | <i>L. infantum</i> | 380 | 332  | 711  |
| LinJ23_V3.1640 | <i>L. infantum</i> | 54  | 713  | 766  |
| LinJ23_V3.1640 | <i>L. infantum</i> | 357 | 789  | 1145 |
| LinJ23_V3.1640 | <i>L. infantum</i> | 60  | 1164 | 1223 |
| LinJ23_V3.1640 | <i>L. infantum</i> | 49  | 1405 | 1453 |
| LinJ23_V3.1640 | <i>L. infantum</i> | 44  | 1563 | 1606 |
| LinJ23_V3.1640 | <i>L. infantum</i> | 175 | 1794 | 1968 |
| LinJ23_V3.1700 | <i>L. infantum</i> | 171 | 78   | 248  |
| LinJ23_V3.1700 | <i>L. infantum</i> | 83  | 368  | 450  |
| LinJ23_V3.1710 | <i>L. infantum</i> | 190 | 174  | 363  |
| LinJ23_V3.1710 | <i>L. infantum</i> | 90  | 546  | 635  |
| LinJ23_V3.1720 | <i>L. infantum</i> | 451 | 1    | 451  |
| LinJ23_V3.1730 | <i>L. infantum</i> | 65  | 1    | 65   |
| LinJ23_V3.1750 | <i>L. infantum</i> | 60  | 177  | 236  |
| LinJ23_V3.1750 | <i>L. infantum</i> | 95  | 359  | 453  |

|                |                    |     |     |     |
|----------------|--------------------|-----|-----|-----|
| LinJ23_V3.1750 | <i>L. infantum</i> | 95  | 359 | 453 |
| LinJ23_V3.1760 | <i>L. infantum</i> | 130 | 1   | 130 |
| LinJ23_V3.1770 | <i>L. infantum</i> | 42  | 97  | 138 |
| LinJ23_V3.1780 | <i>L. infantum</i> | 254 | 1   | 254 |
| LinJ23_V3.1780 | <i>L. infantum</i> | 46  | 313 | 358 |
| LinJ23_V3.1790 | <i>L. infantum</i> | 48  | 27  | 74  |
| LinJ23_V3.1790 | <i>L. infantum</i> | 70  | 127 | 196 |
| LinJ23_V3.1790 | <i>L. infantum</i> | 70  | 127 | 196 |
| LinJ23_V3.1800 | <i>L. infantum</i> | 76  | 97  | 172 |
| LinJ23_V3.1810 | <i>L. infantum</i> | 42  | 1   | 42  |
| LinJ23_V3.1810 | <i>L. infantum</i> | 40  | 52  | 91  |
| LinJ23_V3.1810 | <i>L. infantum</i> | 136 | 132 | 267 |
| LinJ23_V3.1810 | <i>L. infantum</i> | 52  | 352 | 403 |
| LinJ23_V3.1810 | <i>L. infantum</i> | 84  | 418 | 501 |
| LinJ23_V3.1810 | <i>L. infantum</i> | 55  | 540 | 594 |
| LinJ23_V3.1850 | <i>L. infantum</i> | 53  | 1   | 53  |
| LinJ23_V3.1850 | <i>L. infantum</i> | 420 | 71  | 490 |
| LinJ23_V3.1850 | <i>L. infantum</i> | 420 | 71  | 490 |
| LinJ23_V3.1870 | <i>L. infantum</i> | 73  | 148 | 220 |
| LinJ23_V3.1890 | <i>L. infantum</i> | 41  | 88  | 128 |
| LinJ23_V3.1900 | <i>L. infantum</i> | 55  | 403 | 457 |
| LinJ23_V3.1920 | <i>L. infantum</i> | 40  | 80  | 119 |
| LinJ23_V3.1930 | <i>L. infantum</i> | 67  | 106 | 172 |
| LinJ23_V3.1940 | <i>L. infantum</i> | 41  | 348 | 388 |
| LinJ23_V3.1950 | <i>L. infantum</i> | 41  | 1   | 41  |
| LinJ23_V3.1960 | <i>L. infantum</i> | 68  | 61  | 128 |
| LinJ23_V3.1970 | <i>L. infantum</i> | 48  | 576 | 623 |
| LinJ24_V3.0010 | <i>L. infantum</i> | 43  | 69  | 111 |
| LinJ24_V3.0020 | <i>L. infantum</i> | 200 | 284 | 483 |
| LinJ24_V3.0030 | <i>L. infantum</i> | 54  | 1   | 54  |
| LinJ24_V3.0030 | <i>L. infantum</i> | 50  | 117 | 166 |
| LinJ24_V3.0050 | <i>L. infantum</i> | 54  | 57  | 110 |
| LinJ24_V3.0060 | <i>L. infantum</i> | 67  | 334 | 400 |
| LinJ24_V3.0070 | <i>L. infantum</i> | 89  | 206 | 294 |
| LinJ24_V3.0070 | <i>L. infantum</i> | 53  | 387 | 439 |
| LinJ24_V3.0100 | <i>L. infantum</i> | 208 | 15  | 222 |
| LinJ24_V3.0130 | <i>L. infantum</i> | 54  | 235 | 288 |
| LinJ24_V3.0150 | <i>L. infantum</i> | 88  | 1   | 88  |
| LinJ24_V3.0150 | <i>L. infantum</i> | 47  | 140 | 186 |
| LinJ24_V3.0150 | <i>L. infantum</i> | 55  | 235 | 289 |
| LinJ24_V3.0170 | <i>L. infantum</i> | 43  | 221 | 263 |
| LinJ24_V3.0170 | <i>L. infantum</i> | 40  | 269 | 308 |
| LinJ24_V3.0170 | <i>L. infantum</i> | 40  | 269 | 308 |
| LinJ24_V3.0180 | <i>L. infantum</i> | 111 | 1   | 111 |
| LinJ24_V3.0180 | <i>L. infantum</i> | 137 | 677 | 813 |
| LinJ24_V3.0190 | <i>L. infantum</i> | 81  | 19  | 99  |
| LinJ24_V3.0190 | <i>L. infantum</i> | 61  | 112 | 172 |

|                |                    |     |      |      |
|----------------|--------------------|-----|------|------|
| LinJ24_V3.0200 | <i>L. infantum</i> | 169 | 1    | 169  |
| LinJ24_V3.0200 | <i>L. infantum</i> | 88  | 229  | 316  |
| LinJ24_V3.0210 | <i>L. infantum</i> | 67  | 117  | 183  |
| LinJ24_V3.0220 | <i>L. infantum</i> | 88  | 1    | 88   |
| LinJ24_V3.0220 | <i>L. infantum</i> | 45  | 335  | 379  |
| LinJ24_V3.0230 | <i>L. infantum</i> | 62  | 178  | 239  |
| LinJ24_V3.0240 | <i>L. infantum</i> | 52  | 346  | 397  |
| LinJ24_V3.0240 | <i>L. infantum</i> | 43  | 501  | 543  |
| LinJ24_V3.0240 | <i>L. infantum</i> | 46  | 560  | 605  |
| LinJ24_V3.0250 | <i>L. infantum</i> | 72  | 49   | 120  |
| LinJ24_V3.0250 | <i>L. infantum</i> | 46  | 787  | 832  |
| LinJ24_V3.0250 | <i>L. infantum</i> | 64  | 1294 | 1357 |
| LinJ24_V3.0250 | <i>L. infantum</i> | 46  | 1593 | 1638 |
| LinJ24_V3.0260 | <i>L. infantum</i> | 48  | 1    | 48   |
| LinJ24_V3.0260 | <i>L. infantum</i> | 172 | 123  | 294  |
| LinJ24_V3.0260 | <i>L. infantum</i> | 51  | 300  | 350  |
| LinJ24_V3.0260 | <i>L. infantum</i> | 102 | 419  | 520  |
| LinJ24_V3.0260 | <i>L. infantum</i> | 88  | 818  | 905  |
| LinJ24_V3.0260 | <i>L. infantum</i> | 223 | 943  | 1165 |
| LinJ24_V3.0260 | <i>L. infantum</i> | 46  | 1180 | 1225 |
| LinJ24_V3.0260 | <i>L. infantum</i> | 62  | 1278 | 1339 |
| LinJ24_V3.0270 | <i>L. infantum</i> | 76  | 102  | 177  |
| LinJ24_V3.0270 | <i>L. infantum</i> | 48  | 191  | 238  |
| LinJ24_V3.0270 | <i>L. infantum</i> | 48  | 191  | 238  |
| LinJ24_V3.0290 | <i>L. infantum</i> | 47  | 1    | 47   |
| LinJ24_V3.0290 | <i>L. infantum</i> | 53  | 486  | 538  |
| LinJ24_V3.0290 | <i>L. infantum</i> | 86  | 705  | 790  |
| LinJ24_V3.0300 | <i>L. infantum</i> | 107 | 1    | 107  |
| LinJ24_V3.0300 | <i>L. infantum</i> | 53  | 122  | 174  |
| LinJ24_V3.0300 | <i>L. infantum</i> | 56  | 264  | 319  |
| LinJ24_V3.0310 | <i>L. infantum</i> | 49  | 409  | 457  |
| LinJ24_V3.0320 | <i>L. infantum</i> | 88  | 1    | 88   |
| LinJ24_V3.0320 | <i>L. infantum</i> | 57  | 170  | 226  |
| LinJ24_V3.0320 | <i>L. infantum</i> | 54  | 329  | 382  |
| LinJ24_V3.0320 | <i>L. infantum</i> | 73  | 410  | 482  |
| LinJ24_V3.0320 | <i>L. infantum</i> | 93  | 659  | 751  |
| LinJ24_V3.0320 | <i>L. infantum</i> | 124 | 918  | 1041 |
| LinJ24_V3.0340 | <i>L. infantum</i> | 68  | 196  | 263  |
| LinJ24_V3.0350 | <i>L. infantum</i> | 89  | 1    | 89   |
| LinJ24_V3.0360 | <i>L. infantum</i> | 89  | 1    | 89   |
| LinJ24_V3.0360 | <i>L. infantum</i> | 42  | 202  | 243  |
| LinJ24_V3.0360 | <i>L. infantum</i> | 42  | 202  | 243  |
| LinJ24_V3.0380 | <i>L. infantum</i> | 94  | 1    | 94   |
| LinJ24_V3.0380 | <i>L. infantum</i> | 46  | 127  | 172  |
| LinJ24_V3.0380 | <i>L. infantum</i> | 174 | 278  | 451  |
| LinJ24_V3.0380 | <i>L. infantum</i> | 526 | 500  | 1025 |
| LinJ24_V3.0390 | <i>L. infantum</i> | 53  | 229  | 281  |



|                |                    |     |      |      |
|----------------|--------------------|-----|------|------|
| LinJ24_V3.0390 | <i>L. infantum</i> | 67  | 298  | 364  |
| LinJ24_V3.0390 | <i>L. infantum</i> | 41  | 488  | 528  |
| LinJ24_V3.0410 | <i>L. infantum</i> | 264 | 95   | 358  |
| LinJ24_V3.0430 | <i>L. infantum</i> | 100 | 1    | 100  |
| LinJ24_V3.0430 | <i>L. infantum</i> | 98  | 111  | 208  |
| LinJ24_V3.0430 | <i>L. infantum</i> | 43  | 513  | 555  |
| LinJ24_V3.0430 | <i>L. infantum</i> | 49  | 1064 | 1112 |
| LinJ24_V3.0430 | <i>L. infantum</i> | 85  | 1344 | 1428 |
| LinJ24_V3.0440 | <i>L. infantum</i> | 86  | 134  | 219  |
| LinJ24_V3.0440 | <i>L. infantum</i> | 46  | 421  | 466  |
| LinJ24_V3.0440 | <i>L. infantum</i> | 58  | 678  | 735  |
| LinJ24_V3.0440 | <i>L. infantum</i> | 45  | 1162 | 1206 |
| LinJ24_V3.0440 | <i>L. infantum</i> | 49  | 1282 | 1330 |
| LinJ24_V3.0460 | <i>L. infantum</i> | 58  | 81   | 138  |
| LinJ24_V3.0460 | <i>L. infantum</i> | 45  | 568  | 612  |
| LinJ24_V3.0460 | <i>L. infantum</i> | 49  | 688  | 736  |
| LinJ24_V3.0480 | <i>L. infantum</i> | 68  | 198  | 265  |
| LinJ24_V3.0480 | <i>L. infantum</i> | 152 | 270  | 421  |
| LinJ24_V3.0490 | <i>L. infantum</i> | 91  | 10   | 100  |
| LinJ24_V3.0490 | <i>L. infantum</i> | 75  | 142  | 216  |
| LinJ24_V3.0490 | <i>L. infantum</i> | 117 | 271  | 387  |
| LinJ24_V3.0490 | <i>L. infantum</i> | 447 | 723  | 1169 |
| LinJ24_V3.0500 | <i>L. infantum</i> | 43  | 1    | 43   |
| LinJ24_V3.0500 | <i>L. infantum</i> | 62  | 738  | 799  |
| LinJ24_V3.0500 | <i>L. infantum</i> | 89  | 1698 | 1786 |
| LinJ24_V3.0510 | <i>L. infantum</i> | 78  | 1    | 78   |
| LinJ24_V3.0510 | <i>L. infantum</i> | 135 | 104  | 238  |
| LinJ24_V3.0520 | <i>L. infantum</i> | 86  | 49   | 134  |
| LinJ24_V3.0520 | <i>L. infantum</i> | 51  | 427  | 477  |
| LinJ24_V3.0520 | <i>L. infantum</i> | 115 | 508  | 622  |
| LinJ24_V3.0530 | <i>L. infantum</i> | 66  | 65   | 130  |
| LinJ24_V3.0530 | <i>L. infantum</i> | 59  | 622  | 680  |
| LinJ24_V3.0530 | <i>L. infantum</i> | 59  | 622  | 680  |
| LinJ24_V3.0540 | <i>L. infantum</i> | 83  | 81   | 163  |
| LinJ24_V3.0540 | <i>L. infantum</i> | 45  | 183  | 227  |
| LinJ24_V3.0540 | <i>L. infantum</i> | 45  | 183  | 227  |
| LinJ24_V3.0550 | <i>L. infantum</i> | 46  | 341  | 386  |
| LinJ24_V3.0560 | <i>L. infantum</i> | 77  | 29   | 105  |
| LinJ24_V3.0570 | <i>L. infantum</i> | 48  | 83   | 130  |
| LinJ24_V3.0600 | <i>L. infantum</i> | 45  | 643  | 687  |
| LinJ24_V3.0610 | <i>L. infantum</i> | 61  | 819  | 879  |
| LinJ24_V3.0610 | <i>L. infantum</i> | 50  | 967  | 1016 |
| LinJ24_V3.0610 | <i>L. infantum</i> | 40  | 1393 | 1432 |
| LinJ24_V3.0610 | <i>L. infantum</i> | 76  | 1700 | 1775 |
| LinJ24_V3.0620 | <i>L. infantum</i> | 68  | 385  | 452  |
| LinJ24_V3.0620 | <i>L. infantum</i> | 312 | 624  | 935  |
| LinJ24_V3.0630 | <i>L. infantum</i> | 53  | 47   | 99   |

|                |                    |     |      |      |
|----------------|--------------------|-----|------|------|
| LinJ24_V3.0630 | <i>L. infantum</i> | 175 | 495  | 669  |
| LinJ24_V3.0650 | <i>L. infantum</i> | 156 | 322  | 477  |
| LinJ24_V3.0660 | <i>L. infantum</i> | 754 | 214  | 967  |
| LinJ24_V3.0680 | <i>L. infantum</i> | 404 | 333  | 736  |
| LinJ24_V3.0680 | <i>L. infantum</i> | 162 | 800  | 961  |
| LinJ24_V3.0680 | <i>L. infantum</i> | 162 | 998  | 1159 |
| LinJ24_V3.0690 | <i>L. infantum</i> | 53  | 495  | 547  |
| LinJ24_V3.0700 | <i>L. infantum</i> | 41  | 112  | 152  |
| LinJ24_V3.0710 | <i>L. infantum</i> | 137 | 1    | 137  |
| LinJ24_V3.0710 | <i>L. infantum</i> | 90  | 266  | 355  |
| LinJ24_V3.0710 | <i>L. infantum</i> | 47  | 572  | 618  |
| LinJ24_V3.0720 | <i>L. infantum</i> | 53  | 58   | 110  |
| LinJ24_V3.0720 | <i>L. infantum</i> | 52  | 177  | 228  |
| LinJ24_V3.0720 | <i>L. infantum</i> | 48  | 289  | 336  |
| LinJ24_V3.0740 | <i>L. infantum</i> | 84  | 436  | 519  |
| LinJ24_V3.0750 | <i>L. infantum</i> | 244 | 1    | 244  |
| LinJ24_V3.0750 | <i>L. infantum</i> | 94  | 264  | 357  |
| LinJ24_V3.0750 | <i>L. infantum</i> | 250 | 365  | 614  |
| LinJ24_V3.0750 | <i>L. infantum</i> | 74  | 808  | 881  |
| LinJ24_V3.0750 | <i>L. infantum</i> | 45  | 891  | 935  |
| LinJ24_V3.0750 | <i>L. infantum</i> | 108 | 972  | 1079 |
| LinJ24_V3.0760 | <i>L. infantum</i> | 61  | 198  | 258  |
| LinJ24_V3.0760 | <i>L. infantum</i> | 42  | 284  | 325  |
| LinJ24_V3.0760 | <i>L. infantum</i> | 42  | 284  | 325  |
| LinJ24_V3.0770 | <i>L. infantum</i> | 84  | 1    | 84   |
| LinJ24_V3.0770 | <i>L. infantum</i> | 90  | 122  | 211  |
| LinJ24_V3.0770 | <i>L. infantum</i> | 52  | 308  | 359  |
| LinJ24_V3.0770 | <i>L. infantum</i> | 50  | 741  | 790  |
| LinJ24_V3.0770 | <i>L. infantum</i> | 53  | 970  | 1022 |
| LinJ24_V3.0770 | <i>L. infantum</i> | 54  | 1073 | 1126 |
| LinJ24_V3.0800 | <i>L. infantum</i> | 310 | 1    | 310  |
| LinJ24_V3.0810 | <i>L. infantum</i> | 223 | 1    | 223  |
| LinJ24_V3.0810 | <i>L. infantum</i> | 84  | 255  | 338  |
| LinJ24_V3.0810 | <i>L. infantum</i> | 44  | 393  | 436  |
| LinJ24_V3.0820 | <i>L. infantum</i> | 89  | 1    | 89   |
| LinJ24_V3.0820 | <i>L. infantum</i> | 395 | 148  | 542  |
| LinJ24_V3.0830 | <i>L. infantum</i> | 51  | 1    | 51   |
| LinJ24_V3.0830 | <i>L. infantum</i> | 45  | 189  | 233  |
| LinJ24_V3.0830 | <i>L. infantum</i> | 51  | 277  | 327  |
| LinJ24_V3.0840 | <i>L. infantum</i> | 45  | 65   | 109  |
| LinJ24_V3.0840 | <i>L. infantum</i> | 71  | 205  | 275  |
| LinJ24_V3.0840 | <i>L. infantum</i> | 103 | 322  | 424  |
| LinJ24_V3.0840 | <i>L. infantum</i> | 130 | 818  | 947  |
| LinJ24_V3.0840 | <i>L. infantum</i> | 66  | 985  | 1050 |
| LinJ24_V3.0840 | <i>L. infantum</i> | 103 | 1090 | 1192 |
| LinJ24_V3.0840 | <i>L. infantum</i> | 103 | 1428 | 1530 |
| LinJ24_V3.0840 | <i>L. infantum</i> | 60  | 1600 | 1659 |

|                |                    |     |      |      |
|----------------|--------------------|-----|------|------|
| LinJ24_V3.0840 | <i>L. infantum</i> | 102 | 1712 | 1813 |
| LinJ24_V3.0840 | <i>L. infantum</i> | 50  | 2202 | 2251 |
| LinJ24_V3.0840 | <i>L. infantum</i> | 103 | 2267 | 2369 |
| LinJ24_V3.0840 | <i>L. infantum</i> | 130 | 2549 | 2678 |
| LinJ24_V3.0860 | <i>L. infantum</i> | 62  | 1    | 62   |
| LinJ24_V3.0860 | <i>L. infantum</i> | 60  | 158  | 217  |
| LinJ24_V3.0860 | <i>L. infantum</i> | 60  | 158  | 217  |
| LinJ24_V3.0880 | <i>L. infantum</i> | 54  | 147  | 200  |
| LinJ24_V3.0880 | <i>L. infantum</i> | 51  | 238  | 288  |
| LinJ24_V3.0900 | <i>L. infantum</i> | 147 | 1    | 147  |
| LinJ24_V3.0910 | <i>L. infantum</i> | 190 | 1    | 190  |
| LinJ24_V3.0910 | <i>L. infantum</i> | 147 | 393  | 539  |
| LinJ24_V3.0910 | <i>L. infantum</i> | 47  | 823  | 869  |
| LinJ24_V3.0920 | <i>L. infantum</i> | 716 | 61   | 776  |
| LinJ24_V3.0930 | <i>L. infantum</i> | 50  | 180  | 229  |
| LinJ24_V3.0940 | <i>L. infantum</i> | 96  | 1    | 96   |
| LinJ24_V3.0940 | <i>L. infantum</i> | 54  | 211  | 264  |
| LinJ24_V3.0940 | <i>L. infantum</i> | 54  | 211  | 264  |
| LinJ24_V3.0950 | <i>L. infantum</i> | 42  | 105  | 146  |
| LinJ24_V3.0950 | <i>L. infantum</i> | 51  | 255  | 305  |
| LinJ24_V3.0950 | <i>L. infantum</i> | 84  | 515  | 598  |
| LinJ24_V3.0950 | <i>L. infantum</i> | 63  | 637  | 699  |
| LinJ24_V3.0970 | <i>L. infantum</i> | 94  | 70   | 163  |
| LinJ24_V3.0980 | <i>L. infantum</i> | 79  | 13   | 91   |
| LinJ24_V3.0980 | <i>L. infantum</i> | 53  | 98   | 150  |
| LinJ24_V3.0980 | <i>L. infantum</i> | 587 | 200  | 786  |
| LinJ24_V3.0980 | <i>L. infantum</i> | 177 | 805  | 981  |
| LinJ24_V3.0990 | <i>L. infantum</i> | 42  | 58   | 99   |
| LinJ24_V3.0990 | <i>L. infantum</i> | 60  | 267  | 326  |
| LinJ24_V3.0990 | <i>L. infantum</i> | 62  | 583  | 644  |
| LinJ24_V3.0990 | <i>L. infantum</i> | 47  | 650  | 696  |
| LinJ24_V3.1010 | <i>L. infantum</i> | 101 | 470  | 570  |
| LinJ24_V3.1030 | <i>L. infantum</i> | 156 | 83   | 238  |
| LinJ24_V3.1030 | <i>L. infantum</i> | 134 | 294  | 427  |
| LinJ24_V3.1040 | <i>L. infantum</i> | 74  | 114  | 187  |
| LinJ24_V3.1040 | <i>L. infantum</i> | 53  | 326  | 378  |
| LinJ24_V3.1040 | <i>L. infantum</i> | 206 | 539  | 744  |
| LinJ24_V3.1040 | <i>L. infantum</i> | 70  | 827  | 896  |
| LinJ24_V3.1040 | <i>L. infantum</i> | 53  | 898  | 950  |
| LinJ24_V3.1050 | <i>L. infantum</i> | 40  | 171  | 210  |
| LinJ24_V3.1060 | <i>L. infantum</i> | 68  | 39   | 106  |
| LinJ24_V3.1060 | <i>L. infantum</i> | 69  | 109  | 177  |
| LinJ24_V3.1060 | <i>L. infantum</i> | 127 | 330  | 456  |
| LinJ24_V3.1060 | <i>L. infantum</i> | 117 | 586  | 702  |
| LinJ24_V3.1060 | <i>L. infantum</i> | 111 | 770  | 880  |
| LinJ24_V3.1070 | <i>L. infantum</i> | 177 | 1    | 177  |
| LinJ24_V3.1070 | <i>L. infantum</i> | 66  | 395  | 460  |

|                |                    |     |      |      |
|----------------|--------------------|-----|------|------|
| LinJ24_V3.1070 | <i>L. infantum</i> | 129 | 641  | 769  |
| LinJ24_V3.1070 | <i>L. infantum</i> | 64  | 1053 | 1116 |
| LinJ24_V3.1070 | <i>L. infantum</i> | 52  | 1127 | 1178 |
| LinJ24_V3.1070 | <i>L. infantum</i> | 63  | 1211 | 1273 |
| LinJ24_V3.1080 | <i>L. infantum</i> | 70  | 1    | 70   |
| LinJ24_V3.1080 | <i>L. infantum</i> | 93  | 225  | 317  |
| LinJ24_V3.1090 | <i>L. infantum</i> | 163 | 209  | 371  |
| LinJ24_V3.1090 | <i>L. infantum</i> | 182 | 999  | 1180 |
| LinJ24_V3.1090 | <i>L. infantum</i> | 109 | 1222 | 1330 |
| LinJ24_V3.1090 | <i>L. infantum</i> | 134 | 1637 | 1770 |
| LinJ24_V3.1090 | <i>L. infantum</i> | 74  | 1945 | 2018 |
| LinJ24_V3.1090 | <i>L. infantum</i> | 56  | 2022 | 2077 |
| LinJ24_V3.1100 | <i>L. infantum</i> | 79  | 298  | 376  |
| LinJ24_V3.1100 | <i>L. infantum</i> | 43  | 393  | 435  |
| LinJ24_V3.1100 | <i>L. infantum</i> | 43  | 393  | 435  |
| LinJ24_V3.1110 | <i>L. infantum</i> | 61  | 256  | 316  |
| LinJ24_V3.1110 | <i>L. infantum</i> | 40  | 478  | 517  |
| LinJ24_V3.1110 | <i>L. infantum</i> | 40  | 478  | 517  |
| LinJ24_V3.1120 | <i>L. infantum</i> | 43  | 1    | 43   |
| LinJ24_V3.1120 | <i>L. infantum</i> | 118 | 51   | 168  |
| LinJ24_V3.1120 | <i>L. infantum</i> | 182 | 197  | 378  |
| LinJ24_V3.1120 | <i>L. infantum</i> | 46  | 695  | 740  |
| LinJ24_V3.1120 | <i>L. infantum</i> | 79  | 1008 | 1086 |
| LinJ24_V3.1130 | <i>L. infantum</i> | 44  | 303  | 346  |
| LinJ24_V3.1130 | <i>L. infantum</i> | 295 | 420  | 714  |
| LinJ24_V3.1130 | <i>L. infantum</i> | 75  | 940  | 1014 |
| LinJ24_V3.1130 | <i>L. infantum</i> | 57  | 1127 | 1183 |
| LinJ24_V3.1140 | <i>L. infantum</i> | 99  | 1    | 99   |
| LinJ24_V3.1140 | <i>L. infantum</i> | 121 | 179  | 299  |
| LinJ24_V3.1140 | <i>L. infantum</i> | 94  | 480  | 573  |
| LinJ24_V3.1150 | <i>L. infantum</i> | 232 | 1    | 232  |
| LinJ24_V3.1150 | <i>L. infantum</i> | 167 | 241  | 407  |
| LinJ24_V3.1150 | <i>L. infantum</i> | 70  | 579  | 648  |
| LinJ24_V3.1160 | <i>L. infantum</i> | 318 | 35   | 352  |
| LinJ24_V3.1160 | <i>L. infantum</i> | 218 | 387  | 604  |
| LinJ24_V3.1160 | <i>L. infantum</i> | 102 | 618  | 719  |
| LinJ24_V3.1160 | <i>L. infantum</i> | 243 | 746  | 988  |
| LinJ24_V3.1170 | <i>L. infantum</i> | 45  | 71   | 115  |
| LinJ24_V3.1170 | <i>L. infantum</i> | 41  | 134  | 174  |
| LinJ24_V3.1170 | <i>L. infantum</i> | 41  | 134  | 174  |
| LinJ24_V3.1180 | <i>L. infantum</i> | 259 | 96   | 354  |
| LinJ24_V3.1190 | <i>L. infantum</i> | 142 | 1    | 142  |
| LinJ24_V3.1190 | <i>L. infantum</i> | 111 | 158  | 268  |
| LinJ24_V3.1190 | <i>L. infantum</i> | 170 | 344  | 513  |
| LinJ24_V3.1190 | <i>L. infantum</i> | 513 | 520  | 1032 |
| LinJ24_V3.1200 | <i>L. infantum</i> | 41  | 164  | 204  |
| LinJ24_V3.1200 | <i>L. infantum</i> | 40  | 254  | 293  |

|                |                    |     |      |      |
|----------------|--------------------|-----|------|------|
| LinJ24_V3.1200 | <i>L. infantum</i> | 49  | 334  | 382  |
| LinJ24_V3.1200 | <i>L. infantum</i> | 40  | 635  | 674  |
| LinJ24_V3.1200 | <i>L. infantum</i> | 45  | 820  | 864  |
| LinJ24_V3.1200 | <i>L. infantum</i> | 72  | 1098 | 1169 |
| LinJ24_V3.1200 | <i>L. infantum</i> | 61  | 1219 | 1279 |
| LinJ24_V3.1210 | <i>L. infantum</i> | 70  | 1    | 70   |
| LinJ24_V3.1210 | <i>L. infantum</i> | 163 | 86   | 248  |
| LinJ24_V3.1220 | <i>L. infantum</i> | 104 | 1    | 104  |
| LinJ24_V3.1230 | <i>L. infantum</i> | 275 | 1    | 275  |
| LinJ24_V3.1250 | <i>L. infantum</i> | 110 | 24   | 133  |
| LinJ24_V3.1250 | <i>L. infantum</i> | 100 | 176  | 275  |
| LinJ24_V3.1250 | <i>L. infantum</i> | 42  | 388  | 429  |
| LinJ24_V3.1250 | <i>L. infantum</i> | 77  | 467  | 543  |
| LinJ24_V3.1260 | <i>L. infantum</i> | 233 | 1    | 233  |
| LinJ24_V3.1260 | <i>L. infantum</i> | 150 | 287  | 436  |
| LinJ24_V3.1260 | <i>L. infantum</i> | 86  | 677  | 762  |
| LinJ24_V3.1320 | <i>L. infantum</i> | 142 | 44   | 185  |
| LinJ24_V3.1320 | <i>L. infantum</i> | 70  | 215  | 284  |
| LinJ24_V3.1320 | <i>L. infantum</i> | 100 | 381  | 480  |
| LinJ24_V3.1320 | <i>L. infantum</i> | 104 | 1173 | 1276 |
| LinJ24_V3.1320 | <i>L. infantum</i> | 84  | 1394 | 1477 |
| LinJ24_V3.1330 | <i>L. infantum</i> | 84  | 69   | 152  |
| LinJ24_V3.1380 | <i>L. infantum</i> | 64  | 436  | 499  |
| LinJ24_V3.1380 | <i>L. infantum</i> | 53  | 623  | 675  |
| LinJ24_V3.1380 | <i>L. infantum</i> | 60  | 832  | 891  |
| LinJ24_V3.1390 | <i>L. infantum</i> | 84  | 281  | 364  |
| LinJ24_V3.1390 | <i>L. infantum</i> | 42  | 847  | 888  |
| LinJ24_V3.1400 | <i>L. infantum</i> | 42  | 1    | 42   |
| LinJ24_V3.1400 | <i>L. infantum</i> | 66  | 118  | 183  |
| LinJ24_V3.1400 | <i>L. infantum</i> | 100 | 378  | 477  |
| LinJ24_V3.1410 | <i>L. infantum</i> | 81  | 1    | 81   |
| LinJ24_V3.1410 | <i>L. infantum</i> | 52  | 485  | 536  |
| LinJ24_V3.1410 | <i>L. infantum</i> | 52  | 485  | 536  |
| LinJ24_V3.1420 | <i>L. infantum</i> | 156 | 73   | 228  |
| LinJ24_V3.1430 | <i>L. infantum</i> | 93  | 79   | 171  |
| LinJ24_V3.1440 | <i>L. infantum</i> | 161 | 1    | 161  |
| LinJ24_V3.1450 | <i>L. infantum</i> | 44  | 154  | 197  |
| LinJ24_V3.1460 | <i>L. infantum</i> | 68  | 138  | 205  |
| LinJ24_V3.1460 | <i>L. infantum</i> | 273 | 225  | 497  |
| LinJ24_V3.1460 | <i>L. infantum</i> | 128 | 828  | 955  |
| LinJ24_V3.1470 | <i>L. infantum</i> | 597 | 1    | 597  |
| LinJ24_V3.1470 | <i>L. infantum</i> | 375 | 691  | 1065 |
| LinJ24_V3.1470 | <i>L. infantum</i> | 106 | 1099 | 1204 |
| LinJ24_V3.1470 | <i>L. infantum</i> | 53  | 1217 | 1269 |
| LinJ24_V3.1470 | <i>L. infantum</i> | 42  | 1272 | 1313 |
| LinJ24_V3.1470 | <i>L. infantum</i> | 40  | 1364 | 1403 |
| LinJ24_V3.1470 | <i>L. infantum</i> | 245 | 1635 | 1879 |

|                |                    |     |      |      |
|----------------|--------------------|-----|------|------|
| LinJ24_V3.1470 | <i>L. infantum</i> | 237 | 1964 | 2200 |
| LinJ24_V3.1470 | <i>L. infantum</i> | 112 | 2206 | 2317 |
| LinJ24_V3.1470 | <i>L. infantum</i> | 58  | 2336 | 2393 |
| LinJ24_V3.1470 | <i>L. infantum</i> | 155 | 2435 | 2589 |
| LinJ24_V3.1470 | <i>L. infantum</i> | 72  | 2630 | 2701 |
| LinJ24_V3.1470 | <i>L. infantum</i> | 194 | 2732 | 2925 |
| LinJ24_V3.1470 | <i>L. infantum</i> | 47  | 2960 | 3006 |
| LinJ24_V3.1470 | <i>L. infantum</i> | 42  | 3088 | 3129 |
| LinJ24_V3.1470 | <i>L. infantum</i> | 65  | 3168 | 3232 |
| LinJ24_V3.1480 | <i>L. infantum</i> | 732 | 1    | 732  |
| LinJ24_V3.1480 | <i>L. infantum</i> | 66  | 741  | 806  |
| LinJ24_V3.1490 | <i>L. infantum</i> | 53  | 24   | 76   |
| LinJ24_V3.1490 | <i>L. infantum</i> | 52  | 110  | 161  |
| LinJ24_V3.1490 | <i>L. infantum</i> | 46  | 192  | 237  |
| LinJ24_V3.1490 | <i>L. infantum</i> | 84  | 454  | 537  |
| LinJ24_V3.1500 | <i>L. infantum</i> | 288 | 33   | 320  |
| LinJ24_V3.1510 | <i>L. infantum</i> | 120 | 1    | 120  |
| LinJ24_V3.1510 | <i>L. infantum</i> | 58  | 180  | 237  |
| LinJ24_V3.1510 | <i>L. infantum</i> | 100 | 260  | 359  |
| LinJ24_V3.1510 | <i>L. infantum</i> | 69  | 668  | 736  |
| LinJ24_V3.1510 | <i>L. infantum</i> | 232 | 771  | 1002 |
| LinJ24_V3.1510 | <i>L. infantum</i> | 115 | 1011 | 1125 |
| LinJ24_V3.1510 | <i>L. infantum</i> | 51  | 1211 | 1261 |
| LinJ24_V3.1510 | <i>L. infantum</i> | 44  | 1322 | 1365 |
| LinJ24_V3.1510 | <i>L. infantum</i> | 40  | 1565 | 1604 |
| LinJ24_V3.1510 | <i>L. infantum</i> | 185 | 1807 | 1991 |
| LinJ24_V3.1510 | <i>L. infantum</i> | 72  | 2147 | 2218 |
| LinJ24_V3.1510 | <i>L. infantum</i> | 152 | 2256 | 2407 |
| LinJ24_V3.1510 | <i>L. infantum</i> | 100 | 2784 | 2883 |
| LinJ24_V3.1510 | <i>L. infantum</i> | 182 | 3019 | 3200 |
| LinJ24_V3.1520 | <i>L. infantum</i> | 245 | 1    | 245  |
| LinJ24_V3.1520 | <i>L. infantum</i> | 47  | 362  | 408  |
| LinJ24_V3.1520 | <i>L. infantum</i> | 44  | 479  | 522  |
| LinJ24_V3.1520 | <i>L. infantum</i> | 98  | 587  | 684  |
| LinJ24_V3.1530 | <i>L. infantum</i> | 200 | 70   | 269  |
| LinJ24_V3.1530 | <i>L. infantum</i> | 60  | 290  | 349  |
| LinJ24_V3.1530 | <i>L. infantum</i> | 83  | 387  | 469  |
| LinJ24_V3.1530 | <i>L. infantum</i> | 44  | 712  | 755  |
| LinJ24_V3.1530 | <i>L. infantum</i> | 159 | 957  | 1115 |
| LinJ24_V3.1530 | <i>L. infantum</i> | 68  | 1177 | 1244 |
| LinJ24_V3.1530 | <i>L. infantum</i> | 62  | 1259 | 1320 |
| LinJ24_V3.1530 | <i>L. infantum</i> | 82  | 1487 | 1568 |
| LinJ24_V3.1530 | <i>L. infantum</i> | 57  | 1602 | 1658 |
| LinJ24_V3.1530 | <i>L. infantum</i> | 177 | 1769 | 1945 |
| LinJ24_V3.1530 | <i>L. infantum</i> | 52  | 1999 | 2050 |
| LinJ24_V3.1530 | <i>L. infantum</i> | 173 | 2075 | 2247 |
| LinJ24_V3.1530 | <i>L. infantum</i> | 191 | 2335 | 2525 |

|                |                    |     |      |      |
|----------------|--------------------|-----|------|------|
| LinJ24_V3.1540 | <i>L. infantum</i> | 169 | 1    | 169  |
| LinJ24_V3.1540 | <i>L. infantum</i> | 56  | 171  | 226  |
| LinJ24_V3.1540 | <i>L. infantum</i> | 80  | 276  | 355  |
| LinJ24_V3.1540 | <i>L. infantum</i> | 89  | 534  | 622  |
| LinJ24_V3.1550 | <i>L. infantum</i> | 99  | 1    | 99   |
| LinJ24_V3.1580 | <i>L. infantum</i> | 72  | 65   | 136  |
| LinJ24_V3.1580 | <i>L. infantum</i> | 398 | 152  | 549  |
| LinJ24_V3.1580 | <i>L. infantum</i> | 192 | 565  | 756  |
| LinJ24_V3.1580 | <i>L. infantum</i> | 51  | 900  | 950  |
| LinJ24_V3.1590 | <i>L. infantum</i> | 94  | 1    | 94   |
| LinJ24_V3.1590 | <i>L. infantum</i> | 369 | 117  | 485  |
| LinJ24_V3.1590 | <i>L. infantum</i> | 209 | 1073 | 1281 |
| LinJ24_V3.1590 | <i>L. infantum</i> | 54  | 1373 | 1426 |
| LinJ24_V3.1590 | <i>L. infantum</i> | 505 | 1442 | 1946 |
| LinJ24_V3.1620 | <i>L. infantum</i> | 81  | 75   | 155  |
| LinJ24_V3.1620 | <i>L. infantum</i> | 184 | 193  | 376  |
| LinJ24_V3.1620 | <i>L. infantum</i> | 49  | 403  | 451  |
| LinJ24_V3.1620 | <i>L. infantum</i> | 53  | 476  | 528  |
| LinJ24_V3.1620 | <i>L. infantum</i> | 75  | 714  | 788  |
| LinJ24_V3.1630 | <i>L. infantum</i> | 75  | 423  | 497  |
| LinJ24_V3.1640 | <i>L. infantum</i> | 229 | 1    | 229  |
| LinJ24_V3.1640 | <i>L. infantum</i> | 284 | 410  | 693  |
| LinJ24_V3.1650 | <i>L. infantum</i> | 67  | 299  | 365  |
| LinJ24_V3.1660 | <i>L. infantum</i> | 257 | 264  | 520  |
| LinJ24_V3.1710 | <i>L. infantum</i> | 75  | 321  | 395  |
| LinJ24_V3.1720 | <i>L. infantum</i> | 92  | 1    | 92   |
| LinJ24_V3.1720 | <i>L. infantum</i> | 100 | 127  | 226  |
| LinJ24_V3.1720 | <i>L. infantum</i> | 167 | 242  | 408  |
| LinJ24_V3.1720 | <i>L. infantum</i> | 71  | 416  | 486  |
| LinJ24_V3.1730 | <i>L. infantum</i> | 82  | 18   | 99   |
| LinJ24_V3.1730 | <i>L. infantum</i> | 48  | 227  | 274  |
| LinJ24_V3.1730 | <i>L. infantum</i> | 48  | 227  | 274  |
| LinJ24_V3.1740 | <i>L. infantum</i> | 102 | 173  | 274  |
| LinJ24_V3.1750 | <i>L. infantum</i> | 44  | 83   | 126  |
| LinJ24_V3.1750 | <i>L. infantum</i> | 55  | 211  | 265  |
| LinJ24_V3.1750 | <i>L. infantum</i> | 55  | 211  | 265  |
| LinJ24_V3.1770 | <i>L. infantum</i> | 42  | 1    | 42   |
| LinJ24_V3.1770 | <i>L. infantum</i> | 87  | 148  | 234  |
| LinJ24_V3.1780 | <i>L. infantum</i> | 42  | 1    | 42   |
| LinJ24_V3.1790 | <i>L. infantum</i> | 250 | 1    | 250  |
| LinJ24_V3.1790 | <i>L. infantum</i> | 107 | 255  | 361  |
| LinJ24_V3.1790 | <i>L. infantum</i> | 50  | 533  | 582  |
| LinJ24_V3.1790 | <i>L. infantum</i> | 79  | 758  | 836  |
| LinJ24_V3.1800 | <i>L. infantum</i> | 336 | 1    | 336  |
| LinJ24_V3.1800 | <i>L. infantum</i> | 76  | 495  | 570  |
| LinJ24_V3.1800 | <i>L. infantum</i> | 110 | 913  | 1022 |
| LinJ24_V3.1800 | <i>L. infantum</i> | 49  | 1129 | 1177 |

|                |                    |     |      |      |
|----------------|--------------------|-----|------|------|
| LinJ24_V3.1810 | <i>L. infantum</i> | 109 | 117  | 225  |
| LinJ24_V3.1820 | <i>L. infantum</i> | 117 | 94   | 210  |
| LinJ24_V3.1830 | <i>L. infantum</i> | 55  | 59   | 113  |
| LinJ24_V3.1850 | <i>L. infantum</i> | 40  | 470  | 509  |
| LinJ24_V3.1850 | <i>L. infantum</i> | 51  | 587  | 637  |
| LinJ24_V3.1850 | <i>L. infantum</i> | 40  | 974  | 1013 |
| LinJ24_V3.1850 | <i>L. infantum</i> | 60  | 1089 | 1148 |
| LinJ24_V3.1860 | <i>L. infantum</i> | 136 | 1    | 136  |
| LinJ24_V3.1880 | <i>L. infantum</i> | 59  | 1    | 59   |
| LinJ24_V3.1880 | <i>L. infantum</i> | 59  | 337  | 395  |
| LinJ24_V3.1880 | <i>L. infantum</i> | 59  | 337  | 395  |
| LinJ24_V3.1890 | <i>L. infantum</i> | 83  | 20   | 102  |
| LinJ24_V3.1900 | <i>L. infantum</i> | 133 | 35   | 167  |
| LinJ24_V3.1900 | <i>L. infantum</i> | 40  | 201  | 240  |
| LinJ24_V3.1900 | <i>L. infantum</i> | 40  | 201  | 240  |
| LinJ24_V3.1920 | <i>L. infantum</i> | 91  | 85   | 175  |
| LinJ24_V3.1920 | <i>L. infantum</i> | 86  | 182  | 267  |
| LinJ24_V3.1930 | <i>L. infantum</i> | 461 | 1    | 461  |
| LinJ24_V3.1940 | <i>L. infantum</i> | 84  | 37   | 120  |
| LinJ24_V3.1940 | <i>L. infantum</i> | 68  | 374  | 441  |
| LinJ24_V3.1940 | <i>L. infantum</i> | 60  | 468  | 527  |
| LinJ24_V3.1940 | <i>L. infantum</i> | 79  | 666  | 744  |
| LinJ24_V3.1940 | <i>L. infantum</i> | 129 | 772  | 900  |
| LinJ24_V3.1940 | <i>L. infantum</i> | 143 | 990  | 1132 |
| LinJ24_V3.1940 | <i>L. infantum</i> | 98  | 1163 | 1260 |
| LinJ24_V3.1950 | <i>L. infantum</i> | 114 | 83   | 196  |
| LinJ24_V3.1950 | <i>L. infantum</i> | 40  | 496  | 535  |
| LinJ24_V3.1950 | <i>L. infantum</i> | 203 | 731  | 933  |
| LinJ24_V3.1960 | <i>L. infantum</i> | 107 | 1    | 107  |
| LinJ24_V3.1960 | <i>L. infantum</i> | 61  | 137  | 197  |
| LinJ24_V3.1960 | <i>L. infantum</i> | 149 | 334  | 482  |
| LinJ24_V3.1960 | <i>L. infantum</i> | 150 | 509  | 658  |
| LinJ24_V3.1970 | <i>L. infantum</i> | 51  | 492  | 542  |
| LinJ24_V3.1980 | <i>L. infantum</i> | 50  | 310  | 359  |
| LinJ24_V3.2000 | <i>L. infantum</i> | 103 | 1    | 103  |
| LinJ24_V3.2000 | <i>L. infantum</i> | 62  | 224  | 285  |
| LinJ24_V3.2000 | <i>L. infantum</i> | 61  | 412  | 472  |
| LinJ24_V3.2000 | <i>L. infantum</i> | 47  | 477  | 523  |
| LinJ24_V3.2010 | <i>L. infantum</i> | 128 | 1    | 128  |
| LinJ24_V3.2010 | <i>L. infantum</i> | 48  | 157  | 204  |
| LinJ24_V3.2010 | <i>L. infantum</i> | 73  | 432  | 504  |
| LinJ24_V3.2010 | <i>L. infantum</i> | 62  | 581  | 642  |
| LinJ24_V3.2020 | <i>L. infantum</i> | 144 | 1    | 144  |
| LinJ24_V3.2030 | <i>L. infantum</i> | 53  | 525  | 577  |
| LinJ24_V3.2030 | <i>L. infantum</i> | 58  | 629  | 686  |
| LinJ24_V3.2030 | <i>L. infantum</i> | 58  | 629  | 686  |
| LinJ24_V3.2050 | <i>L. infantum</i> | 59  | 32   | 90   |



|                |                    |     |      |      |
|----------------|--------------------|-----|------|------|
| LinJ24_V3.2050 | <i>L. infantum</i> | 69  | 191  | 259  |
| LinJ24_V3.2050 | <i>L. infantum</i> | 60  | 268  | 327  |
| LinJ24_V3.2060 | <i>L. infantum</i> | 191 | 41   | 231  |
| LinJ24_V3.2070 | <i>L. infantum</i> | 118 | 32   | 149  |
| LinJ24_V3.2070 | <i>L. infantum</i> | 156 | 181  | 336  |
| LinJ24_V3.2080 | <i>L. infantum</i> | 62  | 78   | 139  |
| LinJ24_V3.2080 | <i>L. infantum</i> | 41  | 194  | 234  |
| LinJ24_V3.2080 | <i>L. infantum</i> | 41  | 194  | 234  |
| LinJ24_V3.2090 | <i>L. infantum</i> | 71  | 518  | 588  |
| LinJ24_V3.2090 | <i>L. infantum</i> | 110 | 605  | 714  |
| LinJ24_V3.2090 | <i>L. infantum</i> | 60  | 766  | 825  |
| LinJ24_V3.2100 | <i>L. infantum</i> | 91  | 1    | 91   |
| LinJ24_V3.2100 | <i>L. infantum</i> | 43  | 148  | 190  |
| LinJ24_V3.2100 | <i>L. infantum</i> | 43  | 475  | 517  |
| LinJ24_V3.2100 | <i>L. infantum</i> | 61  | 1385 | 1445 |
| LinJ24_V3.2140 | <i>L. infantum</i> | 40  | 1    | 40   |
| LinJ24_V3.2140 | <i>L. infantum</i> | 41  | 103  | 143  |
| LinJ24_V3.2140 | <i>L. infantum</i> | 41  | 103  | 143  |
| LinJ24_V3.2160 | <i>L. infantum</i> | 46  | 1    | 46   |
| LinJ24_V3.2160 | <i>L. infantum</i> | 58  | 123  | 180  |
| LinJ24_V3.2160 | <i>L. infantum</i> | 58  | 123  | 180  |
| LinJ24_V3.2170 | <i>L. infantum</i> | 46  | 1    | 46   |
| LinJ24_V3.2170 | <i>L. infantum</i> | 58  | 123  | 180  |
| LinJ24_V3.2170 | <i>L. infantum</i> | 58  | 123  | 180  |
| LinJ24_V3.2190 | <i>L. infantum</i> | 44  | 1    | 44   |
| LinJ24_V3.2190 | <i>L. infantum</i> | 96  | 215  | 310  |
| LinJ24_V3.2210 | <i>L. infantum</i> | 48  | 18   | 65   |
| LinJ24_V3.2210 | <i>L. infantum</i> | 209 | 73   | 281  |
| LinJ24_V3.2210 | <i>L. infantum</i> | 45  | 414  | 458  |
| LinJ24_V3.2230 | <i>L. infantum</i> | 40  | 158  | 197  |
| LinJ24_V3.2240 | <i>L. infantum</i> | 74  | 1    | 74   |
| LinJ24_V3.2240 | <i>L. infantum</i> | 54  | 92   | 145  |
| LinJ24_V3.2250 | <i>L. infantum</i> | 41  | 294  | 334  |
| LinJ24_V3.2260 | <i>L. infantum</i> | 41  | 65   | 105  |
| LinJ24_V3.2260 | <i>L. infantum</i> | 42  | 511  | 552  |
| LinJ24_V3.2260 | <i>L. infantum</i> | 48  | 594  | 641  |
| LinJ24_V3.2270 | <i>L. infantum</i> | 617 | 27   | 643  |
| LinJ24_V3.2270 | <i>L. infantum</i> | 382 | 654  | 1035 |
| LinJ24_V3.2270 | <i>L. infantum</i> | 368 | 1071 | 1438 |
| LinJ24_V3.2280 | <i>L. infantum</i> | 54  | 1    | 54   |
| LinJ24_V3.2280 | <i>L. infantum</i> | 50  | 198  | 247  |
| LinJ24_V3.2290 | <i>L. infantum</i> | 41  | 206  | 246  |
| LinJ24_V3.2330 | <i>L. infantum</i> | 74  | 123  | 196  |
| LinJ24_V3.2350 | <i>L. infantum</i> | 60  | 1    | 60   |
| LinJ24_V3.2370 | <i>L. infantum</i> | 56  | 242  | 297  |
| LinJ24_V3.2370 | <i>L. infantum</i> | 72  | 742  | 813  |
| LinJ24_V3.2370 | <i>L. infantum</i> | 72  | 742  | 813  |

|                |                    |     |      |      |
|----------------|--------------------|-----|------|------|
| LinJ24_V3.2400 | <i>L. infantum</i> | 69  | 95   | 163  |
| LinJ24_V3.2410 | <i>L. infantum</i> | 61  | 27   | 87   |
| LinJ24_V3.2420 | <i>L. infantum</i> | 84  | 175  | 258  |
| LinJ24_V3.2430 | <i>L. infantum</i> | 41  | 186  | 226  |
| LinJ25_V3.0030 | <i>L. infantum</i> | 82  | 384  | 465  |
| LinJ25_V3.0040 | <i>L. infantum</i> | 127 | 172  | 298  |
| LinJ25_V3.0040 | <i>L. infantum</i> | 133 | 386  | 518  |
| LinJ25_V3.0040 | <i>L. infantum</i> | 219 | 548  | 766  |
| LinJ25_V3.0040 | <i>L. infantum</i> | 60  | 879  | 938  |
| LinJ25_V3.0040 | <i>L. infantum</i> | 40  | 961  | 1000 |
| LinJ25_V3.0040 | <i>L. infantum</i> | 67  | 1189 | 1255 |
| LinJ25_V3.0050 | <i>L. infantum</i> | 58  | 114  | 171  |
| LinJ25_V3.0070 | <i>L. infantum</i> | 41  | 1    | 41   |
| LinJ25_V3.0070 | <i>L. infantum</i> | 50  | 98   | 147  |
| LinJ25_V3.0070 | <i>L. infantum</i> | 50  | 98   | 147  |
| LinJ25_V3.0080 | <i>L. infantum</i> | 40  | 245  | 284  |
| LinJ25_V3.0080 | <i>L. infantum</i> | 142 | 345  | 486  |
| LinJ25_V3.0090 | <i>L. infantum</i> | 64  | 1    | 64   |
| LinJ25_V3.0110 | <i>L. infantum</i> | 62  | 277  | 338  |
| LinJ25_V3.0120 | <i>L. infantum</i> | 42  | 197  | 238  |
| LinJ25_V3.0150 | <i>L. infantum</i> | 49  | 150  | 198  |
| LinJ25_V3.0150 | <i>L. infantum</i> | 54  | 236  | 289  |
| LinJ25_V3.0150 | <i>L. infantum</i> | 46  | 325  | 370  |
| LinJ25_V3.0160 | <i>L. infantum</i> | 79  | 14   | 92   |
| LinJ25_V3.0160 | <i>L. infantum</i> | 90  | 126  | 215  |
| LinJ25_V3.0160 | <i>L. infantum</i> | 90  | 126  | 215  |
| LinJ25_V3.0170 | <i>L. infantum</i> | 101 | 387  | 487  |
| LinJ25_V3.0170 | <i>L. infantum</i> | 41  | 529  | 569  |
| LinJ25_V3.0170 | <i>L. infantum</i> | 105 | 665  | 769  |
| LinJ25_V3.0180 | <i>L. infantum</i> | 62  | 91   | 152  |
| LinJ25_V3.0200 | <i>L. infantum</i> | 61  | 812  | 872  |
| LinJ25_V3.0220 | <i>L. infantum</i> | 174 | 125  | 298  |
| LinJ25_V3.0220 | <i>L. infantum</i> | 158 | 556  | 713  |
| LinJ25_V3.0230 | <i>L. infantum</i> | 85  | 1    | 85   |
| LinJ25_V3.0240 | <i>L. infantum</i> | 97  | 1    | 97   |
| LinJ25_V3.0250 | <i>L. infantum</i> | 250 | 334  | 583  |
| LinJ25_V3.0250 | <i>L. infantum</i> | 267 | 611  | 877  |
| LinJ25_V3.0270 | <i>L. infantum</i> | 40  | 1    | 40   |
| LinJ25_V3.0270 | <i>L. infantum</i> | 50  | 267  | 316  |
| LinJ25_V3.0270 | <i>L. infantum</i> | 119 | 418  | 536  |
| LinJ25_V3.0270 | <i>L. infantum</i> | 58  | 573  | 630  |
| LinJ25_V3.0270 | <i>L. infantum</i> | 150 | 741  | 890  |
| LinJ25_V3.0270 | <i>L. infantum</i> | 223 | 934  | 1156 |
| LinJ25_V3.0280 | <i>L. infantum</i> | 108 | 99   | 206  |
| LinJ25_V3.0280 | <i>L. infantum</i> | 176 | 224  | 399  |
| LinJ25_V3.0280 | <i>L. infantum</i> | 69  | 426  | 494  |
| LinJ25_V3.0280 | <i>L. infantum</i> | 75  | 566  | 640  |

|                |                    |     |      |      |
|----------------|--------------------|-----|------|------|
| LinJ25_V3.0290 | <i>L. infantum</i> | 122 | 173  | 294  |
| LinJ25_V3.0290 | <i>L. infantum</i> | 160 | 425  | 584  |
| LinJ25_V3.0320 | <i>L. infantum</i> | 193 | 241  | 433  |
| LinJ25_V3.0320 | <i>L. infantum</i> | 51  | 499  | 549  |
| LinJ25_V3.0320 | <i>L. infantum</i> | 136 | 586  | 721  |
| LinJ25_V3.0320 | <i>L. infantum</i> | 69  | 739  | 807  |
| LinJ25_V3.0320 | <i>L. infantum</i> | 172 | 911  | 1082 |
| LinJ25_V3.0340 | <i>L. infantum</i> | 400 | 1    | 400  |
| LinJ25_V3.0340 | <i>L. infantum</i> | 55  | 415  | 469  |
| LinJ25_V3.0360 | <i>L. infantum</i> | 92  | 1    | 92   |
| LinJ25_V3.0360 | <i>L. infantum</i> | 87  | 121  | 207  |
| LinJ25_V3.0360 | <i>L. infantum</i> | 43  | 527  | 569  |
| LinJ25_V3.0380 | <i>L. infantum</i> | 75  | 1    | 75   |
| LinJ25_V3.0380 | <i>L. infantum</i> | 53  | 127  | 179  |
| LinJ25_V3.0380 | <i>L. infantum</i> | 53  | 127  | 179  |
| LinJ25_V3.0390 | <i>L. infantum</i> | 60  | 1    | 60   |
| LinJ25_V3.0390 | <i>L. infantum</i> | 441 | 62   | 502  |
| LinJ25_V3.0390 | <i>L. infantum</i> | 65  | 522  | 586  |
| LinJ25_V3.0390 | <i>L. infantum</i> | 105 | 618  | 722  |
| LinJ25_V3.0390 | <i>L. infantum</i> | 41  | 810  | 850  |
| LinJ25_V3.0420 | <i>L. infantum</i> | 123 | 1    | 123  |
| LinJ25_V3.0430 | <i>L. infantum</i> | 295 | 14   | 308  |
| LinJ25_V3.0430 | <i>L. infantum</i> | 324 | 528  | 851  |
| LinJ25_V3.0430 | <i>L. infantum</i> | 48  | 871  | 918  |
| LinJ25_V3.0430 | <i>L. infantum</i> | 288 | 1031 | 1318 |
| LinJ25_V3.0430 | <i>L. infantum</i> | 270 | 1341 | 1610 |
| LinJ25_V3.0440 | <i>L. infantum</i> | 149 | 87   | 235  |
| LinJ25_V3.0450 | <i>L. infantum</i> | 48  | 42   | 89   |
| LinJ25_V3.0450 | <i>L. infantum</i> | 42  | 269  | 310  |
| LinJ25_V3.0450 | <i>L. infantum</i> | 63  | 366  | 428  |
| LinJ25_V3.0450 | <i>L. infantum</i> | 66  | 502  | 567  |
| LinJ25_V3.0450 | <i>L. infantum</i> | 55  | 620  | 674  |
| LinJ25_V3.0460 | <i>L. infantum</i> | 86  | 11   | 96   |
| LinJ25_V3.0460 | <i>L. infantum</i> | 50  | 150  | 199  |
| LinJ25_V3.0460 | <i>L. infantum</i> | 50  | 150  | 199  |
| LinJ25_V3.0470 | <i>L. infantum</i> | 64  | 1    | 64   |
| LinJ25_V3.0480 | <i>L. infantum</i> | 57  | 1043 | 1099 |
| LinJ25_V3.0490 | <i>L. infantum</i> | 45  | 157  | 201  |
| LinJ25_V3.0490 | <i>L. infantum</i> | 52  | 434  | 485  |
| LinJ25_V3.0490 | <i>L. infantum</i> | 63  | 817  | 879  |
| LinJ25_V3.0490 | <i>L. infantum</i> | 46  | 920  | 965  |
| LinJ25_V3.0490 | <i>L. infantum</i> | 71  | 1012 | 1082 |
| LinJ25_V3.0490 | <i>L. infantum</i> | 89  | 1134 | 1222 |
| LinJ25_V3.0490 | <i>L. infantum</i> | 147 | 1276 | 1422 |
| LinJ25_V3.0500 | <i>L. infantum</i> | 59  | 42   | 100  |
| LinJ25_V3.0500 | <i>L. infantum</i> | 63  | 171  | 233  |
| LinJ25_V3.0500 | <i>L. infantum</i> | 63  | 171  | 233  |

|                |                    |     |      |      |
|----------------|--------------------|-----|------|------|
| LinJ25_V3.0510 | <i>L. infantum</i> | 63  | 105  | 167  |
| LinJ25_V3.0520 | <i>L. infantum</i> | 51  | 463  | 513  |
| LinJ25_V3.0530 | <i>L. infantum</i> | 102 | 139  | 240  |
| LinJ25_V3.0540 | <i>L. infantum</i> | 44  | 1    | 44   |
| LinJ25_V3.0550 | <i>L. infantum</i> | 224 | 74   | 297  |
| LinJ25_V3.0560 | <i>L. infantum</i> | 73  | 1    | 73   |
| LinJ25_V3.0560 | <i>L. infantum</i> | 65  | 141  | 205  |
| LinJ25_V3.0560 | <i>L. infantum</i> | 47  | 510  | 556  |
| LinJ25_V3.0570 | <i>L. infantum</i> | 51  | 25   | 75   |
| LinJ25_V3.0580 | <i>L. infantum</i> | 117 | 90   | 206  |
| LinJ25_V3.0590 | <i>L. infantum</i> | 52  | 1    | 52   |
| LinJ25_V3.0590 | <i>L. infantum</i> | 42  | 149  | 190  |
| LinJ25_V3.0590 | <i>L. infantum</i> | 42  | 149  | 190  |
| LinJ25_V3.0610 | <i>L. infantum</i> | 61  | 47   | 107  |
| LinJ25_V3.0610 | <i>L. infantum</i> | 59  | 159  | 217  |
| LinJ25_V3.0610 | <i>L. infantum</i> | 79  | 272  | 350  |
| LinJ25_V3.0620 | <i>L. infantum</i> | 68  | 1    | 68   |
| LinJ25_V3.0620 | <i>L. infantum</i> | 40  | 154  | 193  |
| LinJ25_V3.0620 | <i>L. infantum</i> | 86  | 596  | 681  |
| LinJ25_V3.0620 | <i>L. infantum</i> | 54  | 1026 | 1079 |
| LinJ25_V3.0630 | <i>L. infantum</i> | 57  | 1    | 57   |
| LinJ25_V3.0630 | <i>L. infantum</i> | 89  | 95   | 183  |
| LinJ25_V3.0630 | <i>L. infantum</i> | 71  | 278  | 348  |
| LinJ25_V3.0650 | <i>L. infantum</i> | 46  | 37   | 82   |
| LinJ25_V3.0660 | <i>L. infantum</i> | 63  | 41   | 103  |
| LinJ25_V3.0660 | <i>L. infantum</i> | 108 | 359  | 466  |
| LinJ25_V3.0680 | <i>L. infantum</i> | 419 | 141  | 559  |
| LinJ25_V3.0690 | <i>L. infantum</i> | 901 | 1    | 901  |
| LinJ25_V3.0690 | <i>L. infantum</i> | 176 | 909  | 1084 |
| LinJ25_V3.0690 | <i>L. infantum</i> | 130 | 1320 | 1449 |
| LinJ25_V3.0690 | <i>L. infantum</i> | 202 | 1479 | 1680 |
| LinJ25_V3.0700 | <i>L. infantum</i> | 42  | 1    | 42   |
| LinJ25_V3.0700 | <i>L. infantum</i> | 56  | 673  | 728  |
| LinJ25_V3.0700 | <i>L. infantum</i> | 94  | 754  | 847  |
| LinJ25_V3.0710 | <i>L. infantum</i> | 53  | 1    | 53   |
| LinJ25_V3.0710 | <i>L. infantum</i> | 67  | 173  | 239  |
| LinJ25_V3.0710 | <i>L. infantum</i> | 70  | 250  | 319  |
| LinJ25_V3.0710 | <i>L. infantum</i> | 145 | 355  | 499  |
| LinJ25_V3.0720 | <i>L. infantum</i> | 156 | 1    | 156  |
| LinJ25_V3.0730 | <i>L. infantum</i> | 65  | 1    | 65   |
| LinJ25_V3.0730 | <i>L. infantum</i> | 73  | 207  | 279  |
| LinJ25_V3.0740 | <i>L. infantum</i> | 44  | 96   | 139  |
| LinJ25_V3.0750 | <i>L. infantum</i> | 44  | 96   | 139  |
| LinJ25_V3.0760 | <i>L. infantum</i> | 44  | 187  | 230  |
| LinJ25_V3.0770 | <i>L. infantum</i> | 56  | 99   | 154  |
| LinJ25_V3.0770 | <i>L. infantum</i> | 146 | 289  | 434  |
| LinJ25_V3.0770 | <i>L. infantum</i> | 67  | 446  | 512  |

|                |                    |     |      |      |
|----------------|--------------------|-----|------|------|
| LinJ25_V3.0770 | <i>L. infantum</i> | 75  | 846  | 920  |
| LinJ25_V3.0780 | <i>L. infantum</i> | 117 | 290  | 406  |
| LinJ25_V3.0790 | <i>L. infantum</i> | 67  | 1    | 67   |
| LinJ25_V3.0800 | <i>L. infantum</i> | 78  | 1    | 78   |
| LinJ25_V3.0800 | <i>L. infantum</i> | 107 | 315  | 421  |
| LinJ25_V3.0800 | <i>L. infantum</i> | 107 | 315  | 421  |
| LinJ25_V3.0810 | <i>L. infantum</i> | 109 | 198  | 306  |
| LinJ25_V3.0820 | <i>L. infantum</i> | 145 | 42   | 186  |
| LinJ25_V3.0820 | <i>L. infantum</i> | 102 | 363  | 464  |
| LinJ25_V3.0820 | <i>L. infantum</i> | 77  | 789  | 865  |
| LinJ25_V3.0820 | <i>L. infantum</i> | 53  | 869  | 921  |
| LinJ25_V3.0830 | <i>L. infantum</i> | 142 | 1    | 142  |
| LinJ25_V3.0840 | <i>L. infantum</i> | 41  | 62   | 102  |
| LinJ25_V3.0840 | <i>L. infantum</i> | 52  | 201  | 252  |
| LinJ25_V3.0840 | <i>L. infantum</i> | 121 | 300  | 420  |
| LinJ25_V3.0840 | <i>L. infantum</i> | 47  | 642  | 688  |
| LinJ25_V3.0840 | <i>L. infantum</i> | 44  | 720  | 763  |
| LinJ25_V3.0840 | <i>L. infantum</i> | 88  | 783  | 870  |
| LinJ25_V3.0840 | <i>L. infantum</i> | 102 | 886  | 987  |
| LinJ25_V3.0860 | <i>L. infantum</i> | 101 | 47   | 147  |
| LinJ25_V3.0860 | <i>L. infantum</i> | 95  | 272  | 366  |
| LinJ25_V3.0860 | <i>L. infantum</i> | 61  | 538  | 598  |
| LinJ25_V3.0860 | <i>L. infantum</i> | 177 | 796  | 972  |
| LinJ25_V3.0870 | <i>L. infantum</i> | 145 | 234  | 378  |
| LinJ25_V3.0890 | <i>L. infantum</i> | 328 | 1    | 328  |
| LinJ25_V3.0890 | <i>L. infantum</i> | 249 | 638  | 886  |
| LinJ25_V3.0890 | <i>L. infantum</i> | 162 | 898  | 1059 |
| LinJ25_V3.0910 | <i>L. infantum</i> | 48  | 125  | 172  |
| LinJ25_V3.0910 | <i>L. infantum</i> | 576 | 251  | 826  |
| LinJ25_V3.0910 | <i>L. infantum</i> | 182 | 865  | 1046 |
| LinJ25_V3.0910 | <i>L. infantum</i> | 170 | 1091 | 1260 |
| LinJ25_V3.0910 | <i>L. infantum</i> | 44  | 1280 | 1323 |
| LinJ25_V3.0930 | <i>L. infantum</i> | 66  | 123  | 188  |
| LinJ25_V3.0930 | <i>L. infantum</i> | 62  | 279  | 340  |
| LinJ25_V3.0940 | <i>L. infantum</i> | 43  | 78   | 120  |
| LinJ25_V3.0950 | <i>L. infantum</i> | 177 | 1    | 177  |
| LinJ25_V3.0950 | <i>L. infantum</i> | 254 | 285  | 538  |
| LinJ25_V3.0950 | <i>L. infantum</i> | 66  | 557  | 622  |
| LinJ25_V3.0950 | <i>L. infantum</i> | 150 | 643  | 792  |
| LinJ25_V3.0950 | <i>L. infantum</i> | 49  | 804  | 852  |
| LinJ25_V3.0970 | <i>L. infantum</i> | 247 | 1    | 247  |
| LinJ25_V3.0970 | <i>L. infantum</i> | 191 | 362  | 552  |
| LinJ25_V3.0980 | <i>L. infantum</i> | 55  | 108  | 162  |
| LinJ25_V3.0980 | <i>L. infantum</i> | 74  | 199  | 272  |
| LinJ25_V3.0980 | <i>L. infantum</i> | 74  | 199  | 272  |
| LinJ25_V3.1000 | <i>L. infantum</i> | 387 | 86   | 472  |
| LinJ25_V3.1000 | <i>L. infantum</i> | 44  | 546  | 589  |

|                |                    |     |      |      |
|----------------|--------------------|-----|------|------|
| LinJ25_V3.1000 | <i>L. infantum</i> | 325 | 624  | 948  |
| LinJ25_V3.1000 | <i>L. infantum</i> | 106 | 1001 | 1106 |
| LinJ25_V3.1000 | <i>L. infantum</i> | 46  | 1159 | 1204 |
| LinJ25_V3.1010 | <i>L. infantum</i> | 144 | 1832 | 1975 |
| LinJ25_V3.1010 | <i>L. infantum</i> | 97  | 3218 | 3314 |
| LinJ25_V3.1010 | <i>L. infantum</i> | 60  | 3469 | 3528 |
| LinJ25_V3.1010 | <i>L. infantum</i> | 48  | 3647 | 3694 |
| LinJ25_V3.1010 | <i>L. infantum</i> | 72  | 3761 | 3832 |
| LinJ25_V3.1030 | <i>L. infantum</i> | 492 | 111  | 602  |
| LinJ25_V3.1030 | <i>L. infantum</i> | 101 | 619  | 719  |
| LinJ25_V3.1060 | <i>L. infantum</i> | 61  | 236  | 296  |
| LinJ25_V3.1060 | <i>L. infantum</i> | 85  | 346  | 430  |
| LinJ25_V3.1070 | <i>L. infantum</i> | 50  | 11   | 60   |
| LinJ25_V3.1070 | <i>L. infantum</i> | 116 | 529  | 644  |
| LinJ25_V3.1070 | <i>L. infantum</i> | 58  | 720  | 777  |
| LinJ25_V3.1070 | <i>L. infantum</i> | 48  | 790  | 837  |
| LinJ25_V3.1080 | <i>L. infantum</i> | 299 | 1    | 299  |
| LinJ25_V3.1080 | <i>L. infantum</i> | 43  | 413  | 455  |
| LinJ25_V3.1080 | <i>L. infantum</i> | 474 | 485  | 958  |
| LinJ25_V3.1090 | <i>L. infantum</i> | 61  | 1    | 61   |
| LinJ25_V3.1100 | <i>L. infantum</i> | 434 | 1    | 434  |
| LinJ25_V3.1100 | <i>L. infantum</i> | 89  | 523  | 611  |
| LinJ25_V3.1100 | <i>L. infantum</i> | 233 | 619  | 851  |
| LinJ25_V3.1110 | <i>L. infantum</i> | 186 | 1    | 186  |
| LinJ25_V3.1110 | <i>L. infantum</i> | 242 | 206  | 447  |
| LinJ25_V3.1110 | <i>L. infantum</i> | 124 | 500  | 623  |
| LinJ25_V3.1110 | <i>L. infantum</i> | 171 | 688  | 858  |
| LinJ25_V3.1120 | <i>L. infantum</i> | 286 | 163  | 448  |
| LinJ25_V3.1140 | <i>L. infantum</i> | 46  | 194  | 239  |
| LinJ25_V3.1150 | <i>L. infantum</i> | 799 | 1    | 799  |
| LinJ25_V3.1150 | <i>L. infantum</i> | 141 | 812  | 952  |
| LinJ25_V3.1150 | <i>L. infantum</i> | 190 | 1026 | 1215 |
| LinJ25_V3.1150 | <i>L. infantum</i> | 145 | 1219 | 1363 |
| LinJ25_V3.1150 | <i>L. infantum</i> | 63  | 1507 | 1569 |
| LinJ25_V3.1150 | <i>L. infantum</i> | 130 | 1595 | 1724 |
| LinJ25_V3.1150 | <i>L. infantum</i> | 76  | 1733 | 1808 |
| LinJ25_V3.1150 | <i>L. infantum</i> | 91  | 2193 | 2283 |
| LinJ25_V3.1150 | <i>L. infantum</i> | 40  | 2334 | 2373 |
| LinJ25_V3.1150 | <i>L. infantum</i> | 56  | 2575 | 2630 |
| LinJ25_V3.1150 | <i>L. infantum</i> | 47  | 2693 | 2739 |
| LinJ25_V3.1150 | <i>L. infantum</i> | 131 | 2865 | 2995 |
| LinJ25_V3.1150 | <i>L. infantum</i> | 65  | 3066 | 3130 |
| LinJ25_V3.1150 | <i>L. infantum</i> | 85  | 3164 | 3248 |
| LinJ25_V3.1150 | <i>L. infantum</i> | 52  | 3275 | 3326 |
| LinJ25_V3.1150 | <i>L. infantum</i> | 80  | 3411 | 3490 |
| LinJ25_V3.1150 | <i>L. infantum</i> | 82  | 3553 | 3634 |
| LinJ25_V3.1150 | <i>L. infantum</i> | 154 | 3673 | 3826 |

|                |                    |     |      |      |
|----------------|--------------------|-----|------|------|
| LinJ25_V3.1150 | <i>L. infantum</i> | 70  | 3871 | 3940 |
| LinJ25_V3.1150 | <i>L. infantum</i> | 55  | 4115 | 4169 |
| LinJ25_V3.1150 | <i>L. infantum</i> | 61  | 4178 | 4238 |
| LinJ25_V3.1150 | <i>L. infantum</i> | 61  | 4558 | 4618 |
| LinJ25_V3.1150 | <i>L. infantum</i> | 74  | 4690 | 4763 |
| LinJ25_V3.1150 | <i>L. infantum</i> | 44  | 4768 | 4811 |
| LinJ25_V3.1150 | <i>L. infantum</i> | 81  | 4843 | 4923 |
| LinJ25_V3.1150 | <i>L. infantum</i> | 99  | 5076 | 5174 |
| LinJ25_V3.1150 | <i>L. infantum</i> | 52  | 5192 | 5243 |
| LinJ25_V3.1150 | <i>L. infantum</i> | 80  | 5440 | 5519 |
| LinJ25_V3.1150 | <i>L. infantum</i> | 50  | 5684 | 5733 |
| LinJ25_V3.1150 | <i>L. infantum</i> | 73  | 5788 | 5860 |
| LinJ25_V3.1150 | <i>L. infantum</i> | 77  | 5983 | 6059 |
| LinJ25_V3.1150 | <i>L. infantum</i> | 101 | 6146 | 6246 |
| LinJ25_V3.1180 | <i>L. infantum</i> | 99  | 72   | 170  |
| LinJ25_V3.1180 | <i>L. infantum</i> | 146 | 208  | 353  |
| LinJ25_V3.1180 | <i>L. infantum</i> | 50  | 385  | 434  |
| LinJ25_V3.1180 | <i>L. infantum</i> | 58  | 486  | 543  |
| LinJ25_V3.1220 | <i>L. infantum</i> | 40  | 1    | 40   |
| LinJ25_V3.1230 | <i>L. infantum</i> | 65  | 248  | 312  |
| LinJ25_V3.1230 | <i>L. infantum</i> | 50  | 371  | 420  |
| LinJ25_V3.1230 | <i>L. infantum</i> | 49  | 622  | 670  |
| LinJ25_V3.1230 | <i>L. infantum</i> | 70  | 724  | 793  |
| LinJ25_V3.1240 | <i>L. infantum</i> | 276 | 1    | 276  |
| LinJ25_V3.1240 | <i>L. infantum</i> | 65  | 821  | 885  |
| LinJ25_V3.1240 | <i>L. infantum</i> | 43  | 897  | 939  |
| LinJ25_V3.1250 | <i>L. infantum</i> | 48  | 83   | 130  |
| LinJ25_V3.1250 | <i>L. infantum</i> | 88  | 172  | 259  |
| LinJ25_V3.1250 | <i>L. infantum</i> | 45  | 533  | 577  |
| LinJ25_V3.1260 | <i>L. infantum</i> | 248 | 1    | 248  |
| LinJ25_V3.1260 | <i>L. infantum</i> | 60  | 318  | 377  |
| LinJ25_V3.1260 | <i>L. infantum</i> | 156 | 441  | 596  |
| LinJ25_V3.1260 | <i>L. infantum</i> | 51  | 642  | 692  |
| LinJ25_V3.1260 | <i>L. infantum</i> | 45  | 730  | 774  |
| LinJ25_V3.1260 | <i>L. infantum</i> | 151 | 983  | 1133 |
| LinJ25_V3.1260 | <i>L. infantum</i> | 49  | 1189 | 1237 |
| LinJ25_V3.1260 | <i>L. infantum</i> | 102 | 1302 | 1403 |
| LinJ25_V3.1260 | <i>L. infantum</i> | 103 | 1555 | 1657 |
| LinJ25_V3.1260 | <i>L. infantum</i> | 40  | 2035 | 2074 |
| LinJ25_V3.1270 | <i>L. infantum</i> | 152 | 157  | 308  |
| LinJ25_V3.1270 | <i>L. infantum</i> | 47  | 397  | 443  |
| LinJ25_V3.1270 | <i>L. infantum</i> | 59  | 479  | 537  |
| LinJ25_V3.1270 | <i>L. infantum</i> | 72  | 650  | 721  |
| LinJ25_V3.1270 | <i>L. infantum</i> | 173 | 1160 | 1332 |
| LinJ25_V3.1270 | <i>L. infantum</i> | 137 | 1374 | 1510 |
| LinJ25_V3.1280 | <i>L. infantum</i> | 256 | 27   | 282  |
| LinJ25_V3.1280 | <i>L. infantum</i> | 70  | 349  | 418  |

|                |                    |     |      |      |
|----------------|--------------------|-----|------|------|
| LinJ25_V3.1280 | <i>L. infantum</i> | 73  | 452  | 524  |
| LinJ25_V3.1280 | <i>L. infantum</i> | 64  | 554  | 617  |
| LinJ25_V3.1280 | <i>L. infantum</i> | 41  | 700  | 740  |
| LinJ25_V3.1280 | <i>L. infantum</i> | 98  | 801  | 898  |
| LinJ25_V3.1280 | <i>L. infantum</i> | 224 | 998  | 1221 |
| LinJ25_V3.1290 | <i>L. infantum</i> | 96  | 194  | 289  |
| LinJ25_V3.1290 | <i>L. infantum</i> | 129 | 319  | 447  |
| LinJ25_V3.1300 | <i>L. infantum</i> | 66  | 91   | 156  |
| LinJ25_V3.1300 | <i>L. infantum</i> | 133 | 168  | 300  |
| LinJ25_V3.1300 | <i>L. infantum</i> | 175 | 334  | 508  |
| LinJ25_V3.1310 | <i>L. infantum</i> | 67  | 1    | 67   |
| LinJ25_V3.1310 | <i>L. infantum</i> | 51  | 102  | 152  |
| LinJ25_V3.1310 | <i>L. infantum</i> | 67  | 244  | 310  |
| LinJ25_V3.1310 | <i>L. infantum</i> | 107 | 538  | 644  |
| LinJ25_V3.1310 | <i>L. infantum</i> | 49  | 712  | 760  |
| LinJ25_V3.1310 | <i>L. infantum</i> | 81  | 894  | 974  |
| LinJ25_V3.1330 | <i>L. infantum</i> | 56  | 15   | 70   |
| LinJ25_V3.1330 | <i>L. infantum</i> | 75  | 135  | 209  |
| LinJ25_V3.1330 | <i>L. infantum</i> | 42  | 459  | 500  |
| LinJ25_V3.1330 | <i>L. infantum</i> | 90  | 540  | 629  |
| LinJ25_V3.1340 | <i>L. infantum</i> | 48  | 1    | 48   |
| LinJ25_V3.1340 | <i>L. infantum</i> | 82  | 104  | 185  |
| LinJ25_V3.1370 | <i>L. infantum</i> | 72  | 146  | 217  |
| LinJ25_V3.1370 | <i>L. infantum</i> | 164 | 254  | 417  |
| LinJ25_V3.1370 | <i>L. infantum</i> | 128 | 553  | 680  |
| LinJ25_V3.1380 | <i>L. infantum</i> | 243 | 1    | 243  |
| LinJ25_V3.1390 | <i>L. infantum</i> | 290 | 18   | 307  |
| LinJ25_V3.1390 | <i>L. infantum</i> | 109 | 358  | 466  |
| LinJ25_V3.1390 | <i>L. infantum</i> | 40  | 622  | 661  |
| LinJ25_V3.1390 | <i>L. infantum</i> | 40  | 713  | 752  |
| LinJ25_V3.1390 | <i>L. infantum</i> | 73  | 844  | 916  |
| LinJ25_V3.1390 | <i>L. infantum</i> | 75  | 1181 | 1255 |
| LinJ25_V3.1390 | <i>L. infantum</i> | 78  | 1474 | 1551 |
| LinJ25_V3.1390 | <i>L. infantum</i> | 83  | 1641 | 1723 |
| LinJ25_V3.1390 | <i>L. infantum</i> | 71  | 1929 | 1999 |
| LinJ25_V3.1390 | <i>L. infantum</i> | 183 | 2036 | 2218 |
| LinJ25_V3.1390 | <i>L. infantum</i> | 46  | 2222 | 2267 |
| LinJ25_V3.1390 | <i>L. infantum</i> | 64  | 2335 | 2398 |
| LinJ25_V3.1390 | <i>L. infantum</i> | 44  | 2508 | 2551 |
| LinJ25_V3.1400 | <i>L. infantum</i> | 54  | 1    | 54   |
| LinJ25_V3.1400 | <i>L. infantum</i> | 109 | 161  | 269  |
| LinJ25_V3.1400 | <i>L. infantum</i> | 68  | 575  | 642  |
| LinJ25_V3.1400 | <i>L. infantum</i> | 82  | 646  | 727  |
| LinJ25_V3.1400 | <i>L. infantum</i> | 46  | 767  | 812  |
| LinJ25_V3.1400 | <i>L. infantum</i> | 107 | 860  | 966  |
| LinJ25_V3.1410 | <i>L. infantum</i> | 80  | 97   | 176  |
| LinJ25_V3.1410 | <i>L. infantum</i> | 74  | 209  | 282  |



|                |                    |     |      |      |
|----------------|--------------------|-----|------|------|
| LinJ25_V3.1410 | <i>L. infantum</i> | 138 | 335  | 472  |
| LinJ25_V3.1420 | <i>L. infantum</i> | 53  | 33   | 85   |
| LinJ25_V3.1420 | <i>L. infantum</i> | 102 | 135  | 236  |
| LinJ25_V3.1440 | <i>L. infantum</i> | 70  | 73   | 142  |
| LinJ25_V3.1440 | <i>L. infantum</i> | 103 | 293  | 395  |
| LinJ25_V3.1450 | <i>L. infantum</i> | 56  | 115  | 170  |
| LinJ25_V3.1450 | <i>L. infantum</i> | 72  | 359  | 430  |
| LinJ25_V3.1450 | <i>L. infantum</i> | 43  | 511  | 553  |
| LinJ25_V3.1470 | <i>L. infantum</i> | 92  | 155  | 246  |
| LinJ25_V3.1470 | <i>L. infantum</i> | 219 | 269  | 487  |
| LinJ25_V3.1480 | <i>L. infantum</i> | 208 | 302  | 509  |
| LinJ25_V3.1490 | <i>L. infantum</i> | 46  | 99   | 144  |
| LinJ25_V3.1510 | <i>L. infantum</i> | 51  | 288  | 338  |
| LinJ25_V3.1520 | <i>L. infantum</i> | 43  | 209  | 251  |
| LinJ25_V3.1520 | <i>L. infantum</i> | 51  | 412  | 462  |
| LinJ25_V3.1520 | <i>L. infantum</i> | 75  | 647  | 721  |
| LinJ25_V3.1530 | <i>L. infantum</i> | 42  | 1    | 42   |
| LinJ25_V3.1540 | <i>L. infantum</i> | 78  | 126  | 203  |
| LinJ25_V3.1550 | <i>L. infantum</i> | 55  | 63   | 117  |
| LinJ25_V3.1550 | <i>L. infantum</i> | 97  | 194  | 290  |
| LinJ25_V3.1550 | <i>L. infantum</i> | 55  | 531  | 585  |
| LinJ25_V3.1550 | <i>L. infantum</i> | 86  | 614  | 699  |
| LinJ25_V3.1550 | <i>L. infantum</i> | 71  | 758  | 828  |
| LinJ25_V3.1550 | <i>L. infantum</i> | 45  | 911  | 955  |
| LinJ25_V3.1550 | <i>L. infantum</i> | 43  | 1024 | 1066 |
| LinJ25_V3.1550 | <i>L. infantum</i> | 47  | 1162 | 1208 |
| LinJ25_V3.1560 | <i>L. infantum</i> | 47  | 127  | 173  |
| LinJ25_V3.1560 | <i>L. infantum</i> | 52  | 298  | 349  |
| LinJ25_V3.1560 | <i>L. infantum</i> | 102 | 380  | 481  |
| LinJ25_V3.1560 | <i>L. infantum</i> | 57  | 497  | 553  |
| LinJ25_V3.1570 | <i>L. infantum</i> | 306 | 220  | 525  |
| LinJ25_V3.1580 | <i>L. infantum</i> | 181 | 1    | 181  |
| LinJ25_V3.1580 | <i>L. infantum</i> | 89  | 209  | 297  |
| LinJ25_V3.1580 | <i>L. infantum</i> | 44  | 406  | 449  |
| LinJ25_V3.1580 | <i>L. infantum</i> | 53  | 683  | 735  |
| LinJ25_V3.1580 | <i>L. infantum</i> | 203 | 738  | 940  |
| LinJ25_V3.1590 | <i>L. infantum</i> | 56  | 132  | 187  |
| LinJ25_V3.1590 | <i>L. infantum</i> | 45  | 510  | 554  |
| LinJ25_V3.1590 | <i>L. infantum</i> | 45  | 510  | 554  |
| LinJ25_V3.1600 | <i>L. infantum</i> | 84  | 1    | 84   |
| LinJ25_V3.1620 | <i>L. infantum</i> | 160 | 12   | 171  |
| LinJ25_V3.1620 | <i>L. infantum</i> | 74  | 332  | 405  |
| LinJ25_V3.1620 | <i>L. infantum</i> | 92  | 470  | 561  |
| LinJ25_V3.1630 | <i>L. infantum</i> | 43  | 112  | 154  |
| LinJ25_V3.1630 | <i>L. infantum</i> | 60  | 297  | 356  |
| LinJ25_V3.1630 | <i>L. infantum</i> | 79  | 823  | 901  |
| LinJ25_V3.1630 | <i>L. infantum</i> | 59  | 1147 | 1205 |

|                |                    |     |      |      |
|----------------|--------------------|-----|------|------|
| LinJ25_V3.1630 | <i>L. infantum</i> | 63  | 1251 | 1313 |
| LinJ25_V3.1630 | <i>L. infantum</i> | 50  | 1443 | 1492 |
| LinJ25_V3.1630 | <i>L. infantum</i> | 89  | 1610 | 1698 |
| LinJ25_V3.1630 | <i>L. infantum</i> | 93  | 1748 | 1840 |
| LinJ25_V3.1630 | <i>L. infantum</i> | 47  | 1893 | 1939 |
| LinJ25_V3.1630 | <i>L. infantum</i> | 77  | 1976 | 2052 |
| LinJ25_V3.1630 | <i>L. infantum</i> | 106 | 2054 | 2159 |
| LinJ25_V3.1630 | <i>L. infantum</i> | 99  | 2200 | 2298 |
| LinJ25_V3.1640 | <i>L. infantum</i> | 51  | 76   | 126  |
| LinJ25_V3.1640 | <i>L. infantum</i> | 76  | 345  | 420  |
| LinJ25_V3.1640 | <i>L. infantum</i> | 69  | 450  | 518  |
| LinJ25_V3.1650 | <i>L. infantum</i> | 496 | 87   | 582  |
| LinJ25_V3.1650 | <i>L. infantum</i> | 53  | 755  | 807  |
| LinJ25_V3.1650 | <i>L. infantum</i> | 48  | 915  | 962  |
| LinJ25_V3.1650 | <i>L. infantum</i> | 136 | 1017 | 1152 |
| LinJ25_V3.1660 | <i>L. infantum</i> | 55  | 657  | 711  |
| LinJ25_V3.1660 | <i>L. infantum</i> | 52  | 816  | 867  |
| LinJ25_V3.1660 | <i>L. infantum</i> | 42  | 1209 | 1250 |
| LinJ25_V3.1670 | <i>L. infantum</i> | 69  | 201  | 269  |
| LinJ25_V3.1690 | <i>L. infantum</i> | 121 | 1    | 121  |
| LinJ25_V3.1690 | <i>L. infantum</i> | 85  | 168  | 252  |
| LinJ25_V3.1700 | <i>L. infantum</i> | 57  | 216  | 272  |
| LinJ25_V3.1700 | <i>L. infantum</i> | 43  | 325  | 367  |
| LinJ25_V3.1700 | <i>L. infantum</i> | 58  | 408  | 465  |
| LinJ25_V3.1710 | <i>L. infantum</i> | 53  | 1    | 53   |
| LinJ25_V3.1730 | <i>L. infantum</i> | 86  | 483  | 568  |
| LinJ25_V3.1750 | <i>L. infantum</i> | 137 | 1    | 137  |
| LinJ25_V3.1750 | <i>L. infantum</i> | 95  | 173  | 267  |
| LinJ25_V3.1750 | <i>L. infantum</i> | 188 | 543  | 730  |
| LinJ25_V3.1750 | <i>L. infantum</i> | 167 | 745  | 911  |
| LinJ25_V3.1750 | <i>L. infantum</i> | 48  | 988  | 1035 |
| LinJ25_V3.1750 | <i>L. infantum</i> | 44  | 1115 | 1158 |
| LinJ25_V3.1750 | <i>L. infantum</i> | 63  | 1389 | 1451 |
| LinJ25_V3.1760 | <i>L. infantum</i> | 117 | 89   | 205  |
| LinJ25_V3.1770 | <i>L. infantum</i> | 50  | 1    | 50   |
| LinJ25_V3.1770 | <i>L. infantum</i> | 105 | 228  | 332  |
| LinJ25_V3.1770 | <i>L. infantum</i> | 317 | 343  | 659  |
| LinJ25_V3.1770 | <i>L. infantum</i> | 62  | 740  | 801  |
| LinJ25_V3.1770 | <i>L. infantum</i> | 58  | 849  | 906  |
| LinJ25_V3.1770 | <i>L. infantum</i> | 116 | 936  | 1051 |
| LinJ25_V3.1800 | <i>L. infantum</i> | 41  | 483  | 523  |
| LinJ25_V3.1800 | <i>L. infantum</i> | 40  | 713  | 752  |
| LinJ25_V3.1800 | <i>L. infantum</i> | 61  | 1202 | 1262 |
| LinJ25_V3.1800 | <i>L. infantum</i> | 94  | 1477 | 1570 |
| LinJ25_V3.1810 | <i>L. infantum</i> | 75  | 38   | 112  |
| LinJ25_V3.1810 | <i>L. infantum</i> | 53  | 167  | 219  |
| LinJ25_V3.1810 | <i>L. infantum</i> | 53  | 167  | 219  |

|                |                    |     |     |      |
|----------------|--------------------|-----|-----|------|
| LinJ25_V3.1820 | <i>L. infantum</i> | 106 | 1   | 106  |
| LinJ25_V3.1820 | <i>L. infantum</i> | 125 | 183 | 307  |
| LinJ25_V3.1840 | <i>L. infantum</i> | 145 | 17  | 161  |
| LinJ25_V3.1840 | <i>L. infantum</i> | 79  | 252 | 330  |
| LinJ25_V3.1840 | <i>L. infantum</i> | 66  | 361 | 426  |
| LinJ25_V3.1860 | <i>L. infantum</i> | 93  | 437 | 529  |
| LinJ25_V3.1880 | <i>L. infantum</i> | 99  | 93  | 191  |
| LinJ25_V3.1880 | <i>L. infantum</i> | 90  | 226 | 315  |
| LinJ25_V3.1880 | <i>L. infantum</i> | 135 | 419 | 553  |
| LinJ25_V3.1880 | <i>L. infantum</i> | 40  | 561 | 600  |
| LinJ25_V3.1880 | <i>L. infantum</i> | 46  | 751 | 796  |
| LinJ25_V3.1880 | <i>L. infantum</i> | 74  | 919 | 992  |
| LinJ25_V3.1890 | <i>L. infantum</i> | 47  | 1   | 47   |
| LinJ25_V3.1900 | <i>L. infantum</i> | 65  | 1   | 65   |
| LinJ25_V3.1900 | <i>L. infantum</i> | 747 | 101 | 847  |
| LinJ25_V3.1910 | <i>L. infantum</i> | 128 | 75  | 202  |
| LinJ25_V3.1910 | <i>L. infantum</i> | 215 | 240 | 454  |
| LinJ25_V3.1910 | <i>L. infantum</i> | 417 | 582 | 998  |
| LinJ25_V3.1920 | <i>L. infantum</i> | 153 | 11  | 163  |
| LinJ25_V3.1920 | <i>L. infantum</i> | 321 | 183 | 503  |
| LinJ25_V3.1930 | <i>L. infantum</i> | 104 | 36  | 139  |
| LinJ25_V3.1930 | <i>L. infantum</i> | 75  | 156 | 230  |
| LinJ25_V3.1940 | <i>L. infantum</i> | 65  | 10  | 74   |
| LinJ25_V3.1950 | <i>L. infantum</i> | 41  | 72  | 112  |
| LinJ25_V3.1950 | <i>L. infantum</i> | 171 | 161 | 331  |
| LinJ25_V3.1970 | <i>L. infantum</i> | 89  | 1   | 89   |
| LinJ25_V3.1980 | <i>L. infantum</i> | 56  | 1   | 56   |
| LinJ25_V3.1990 | <i>L. infantum</i> | 46  | 63  | 108  |
| LinJ25_V3.1990 | <i>L. infantum</i> | 85  | 139 | 223  |
| LinJ25_V3.1990 | <i>L. infantum</i> | 41  | 255 | 295  |
| LinJ25_V3.2000 | <i>L. infantum</i> | 122 | 1   | 122  |
| LinJ25_V3.2000 | <i>L. infantum</i> | 45  | 358 | 402  |
| LinJ25_V3.2020 | <i>L. infantum</i> | 41  | 399 | 439  |
| LinJ25_V3.2020 | <i>L. infantum</i> | 45  | 463 | 507  |
| LinJ25_V3.2020 | <i>L. infantum</i> | 45  | 463 | 507  |
| LinJ25_V3.2030 | <i>L. infantum</i> | 81  | 317 | 397  |
| LinJ25_V3.2030 | <i>L. infantum</i> | 253 | 471 | 723  |
| LinJ25_V3.2030 | <i>L. infantum</i> | 72  | 760 | 831  |
| LinJ25_V3.2030 | <i>L. infantum</i> | 187 | 880 | 1066 |
| LinJ25_V3.2050 | <i>L. infantum</i> | 70  | 1   | 70   |
| LinJ25_V3.2050 | <i>L. infantum</i> | 137 | 462 | 598  |
| LinJ25_V3.2050 | <i>L. infantum</i> | 97  | 620 | 716  |
| LinJ25_V3.2050 | <i>L. infantum</i> | 125 | 787 | 911  |
| LinJ25_V3.2050 | <i>L. infantum</i> | 94  | 913 | 1006 |
| LinJ25_V3.2060 | <i>L. infantum</i> | 67  | 1   | 67   |
| LinJ25_V3.2060 | <i>L. infantum</i> | 685 | 790 | 1474 |
| LinJ25_V3.2070 | <i>L. infantum</i> | 41  | 156 | 196  |

|                |                    |     |     |      |
|----------------|--------------------|-----|-----|------|
| LinJ25_V3.2070 | <i>L. infantum</i> | 48  | 235 | 282  |
| LinJ25_V3.2070 | <i>L. infantum</i> | 51  | 382 | 432  |
| LinJ25_V3.2070 | <i>L. infantum</i> | 132 | 449 | 580  |
| LinJ25_V3.2080 | <i>L. infantum</i> | 58  | 257 | 314  |
| LinJ25_V3.2080 | <i>L. infantum</i> | 80  | 401 | 480  |
| LinJ25_V3.2080 | <i>L. infantum</i> | 118 | 779 | 896  |
| LinJ25_V3.2110 | <i>L. infantum</i> | 174 | 1   | 174  |
| LinJ25_V3.2120 | <i>L. infantum</i> | 46  | 278 | 323  |
| LinJ25_V3.2130 | <i>L. infantum</i> | 219 | 14  | 232  |
| LinJ25_V3.2130 | <i>L. infantum</i> | 56  | 539 | 594  |
| LinJ25_V3.2130 | <i>L. infantum</i> | 89  | 758 | 846  |
| LinJ25_V3.2130 | <i>L. infantum</i> | 75  | 970 | 1044 |
| LinJ25_V3.2140 | <i>L. infantum</i> | 81  | 1   | 81   |
| LinJ25_V3.2150 | <i>L. infantum</i> | 103 | 127 | 229  |
| LinJ25_V3.2150 | <i>L. infantum</i> | 62  | 431 | 492  |
| LinJ25_V3.2150 | <i>L. infantum</i> | 62  | 431 | 492  |
| LinJ25_V3.2170 | <i>L. infantum</i> | 40  | 19  | 58   |
| LinJ25_V3.2180 | <i>L. infantum</i> | 114 | 1   | 114  |
| LinJ25_V3.2190 | <i>L. infantum</i> | 92  | 243 | 334  |
| LinJ25_V3.2210 | <i>L. infantum</i> | 111 | 1   | 111  |
| LinJ25_V3.2210 | <i>L. infantum</i> | 61  | 152 | 212  |
| LinJ25_V3.2220 | <i>L. infantum</i> | 46  | 243 | 288  |
| LinJ25_V3.2240 | <i>L. infantum</i> | 52  | 20  | 71   |
| LinJ25_V3.2240 | <i>L. infantum</i> | 46  | 359 | 404  |
| LinJ25_V3.2240 | <i>L. infantum</i> | 46  | 359 | 404  |
| LinJ25_V3.2250 | <i>L. infantum</i> | 89  | 45  | 133  |
| LinJ25_V3.2250 | <i>L. infantum</i> | 73  | 165 | 237  |
| LinJ25_V3.2260 | <i>L. infantum</i> | 62  | 175 | 236  |
| LinJ25_V3.2270 | <i>L. infantum</i> | 55  | 1   | 55   |
| LinJ25_V3.2290 | <i>L. infantum</i> | 139 | 174 | 312  |
| LinJ25_V3.2290 | <i>L. infantum</i> | 49  | 329 | 377  |
| LinJ25_V3.2300 | <i>L. infantum</i> | 122 | 1   | 122  |
| LinJ25_V3.2320 | <i>L. infantum</i> | 81  | 377 | 457  |
| LinJ25_V3.2320 | <i>L. infantum</i> | 64  | 490 | 553  |
| LinJ25_V3.2320 | <i>L. infantum</i> | 46  | 582 | 627  |
| LinJ25_V3.2340 | <i>L. infantum</i> | 68  | 175 | 242  |
| LinJ25_V3.2350 | <i>L. infantum</i> | 63  | 379 | 441  |
| LinJ25_V3.2360 | <i>L. infantum</i> | 106 | 61  | 166  |
| LinJ25_V3.2370 | <i>L. infantum</i> | 49  | 75  | 123  |
| LinJ25_V3.2410 | <i>L. infantum</i> | 150 | 260 | 409  |
| LinJ25_V3.2420 | <i>L. infantum</i> | 51  | 359 | 409  |
| LinJ25_V3.2440 | <i>L. infantum</i> | 40  | 798 | 837  |
| LinJ25_V3.2450 | <i>L. infantum</i> | 46  | 1   | 46   |
| LinJ25_V3.2450 | <i>L. infantum</i> | 61  | 329 | 389  |
| LinJ25_V3.2450 | <i>L. infantum</i> | 61  | 329 | 389  |
| LinJ25_V3.2460 | <i>L. infantum</i> | 48  | 44  | 91   |
| LinJ25_V3.2470 | <i>L. infantum</i> | 57  | 1   | 57   |

|                |                    |     |      |      |
|----------------|--------------------|-----|------|------|
| LinJ25_V3.2470 | <i>L. infantum</i> | 88  | 486  | 573  |
| LinJ25_V3.2500 | <i>L. infantum</i> | 42  | 598  | 639  |
| LinJ25_V3.2520 | <i>L. infantum</i> | 297 | 398  | 694  |
| LinJ25_V3.2560 | <i>L. infantum</i> | 49  | 1    | 49   |
| LinJ25_V3.2570 | <i>L. infantum</i> | 96  | 1    | 96   |
| LinJ25_V3.2570 | <i>L. infantum</i> | 53  | 133  | 185  |
| LinJ26_V3.0020 | <i>L. infantum</i> | 59  | 304  | 362  |
| LinJ26_V3.0060 | <i>L. infantum</i> | 266 | 1    | 266  |
| LinJ26_V3.0070 | <i>L. infantum</i> | 56  | 1    | 56   |
| LinJ26_V3.0070 | <i>L. infantum</i> | 78  | 225  | 302  |
| LinJ26_V3.0070 | <i>L. infantum</i> | 78  | 225  | 302  |
| LinJ26_V3.0130 | <i>L. infantum</i> | 74  | 120  | 193  |
| LinJ26_V3.0130 | <i>L. infantum</i> | 69  | 474  | 542  |
| LinJ26_V3.0130 | <i>L. infantum</i> | 51  | 548  | 598  |
| LinJ26_V3.0140 | <i>L. infantum</i> | 89  | 1    | 89   |
| LinJ26_V3.0150 | <i>L. infantum</i> | 65  | 24   | 88   |
| LinJ26_V3.0160 | <i>L. infantum</i> | 72  | 1    | 72   |
| LinJ26_V3.0200 | <i>L. infantum</i> | 68  | 252  | 319  |
| LinJ26_V3.0220 | <i>L. infantum</i> | 71  | 70   | 140  |
| LinJ26_V3.0220 | <i>L. infantum</i> | 71  | 308  | 378  |
| LinJ26_V3.0240 | <i>L. infantum</i> | 40  | 342  | 381  |
| LinJ26_V3.0240 | <i>L. infantum</i> | 42  | 607  | 648  |
| LinJ26_V3.0240 | <i>L. infantum</i> | 42  | 607  | 648  |
| LinJ26_V3.0250 | <i>L. infantum</i> | 43  | 110  | 152  |
| LinJ26_V3.0280 | <i>L. infantum</i> | 63  | 97   | 159  |
| LinJ26_V3.0300 | <i>L. infantum</i> | 51  | 1    | 51   |
| LinJ26_V3.0340 | <i>L. infantum</i> | 107 | 587  | 693  |
| LinJ26_V3.0350 | <i>L. infantum</i> | 51  | 21   | 71   |
| LinJ26_V3.0350 | <i>L. infantum</i> | 53  | 181  | 233  |
| LinJ26_V3.0350 | <i>L. infantum</i> | 41  | 648  | 688  |
| LinJ26_V3.0350 | <i>L. infantum</i> | 80  | 917  | 996  |
| LinJ26_V3.0350 | <i>L. infantum</i> | 54  | 1187 | 1240 |
| LinJ26_V3.0350 | <i>L. infantum</i> | 68  | 1485 | 1552 |
| LinJ26_V3.0360 | <i>L. infantum</i> | 77  | 469  | 545  |
| LinJ26_V3.0380 | <i>L. infantum</i> | 58  | 1    | 58   |
| LinJ26_V3.0390 | <i>L. infantum</i> | 63  | 166  | 228  |
| LinJ26_V3.0390 | <i>L. infantum</i> | 48  | 284  | 331  |
| LinJ26_V3.0390 | <i>L. infantum</i> | 48  | 284  | 331  |
| LinJ26_V3.0410 | <i>L. infantum</i> | 61  | 298  | 358  |
| LinJ26_V3.0410 | <i>L. infantum</i> | 79  | 558  | 636  |
| LinJ26_V3.0430 | <i>L. infantum</i> | 126 | 1    | 126  |
| LinJ26_V3.0430 | <i>L. infantum</i> | 74  | 143  | 216  |
| LinJ26_V3.0460 | <i>L. infantum</i> | 55  | 916  | 970  |
| LinJ26_V3.0470 | <i>L. infantum</i> | 45  | 224  | 268  |
| LinJ26_V3.0480 | <i>L. infantum</i> | 214 | 8    | 221  |
| LinJ26_V3.0490 | <i>L. infantum</i> | 46  | 95   | 140  |
| LinJ26_V3.0490 | <i>L. infantum</i> | 46  | 274  | 319  |

|                |                    |     |      |      |
|----------------|--------------------|-----|------|------|
| LinJ26_V3.0490 | <i>L. infantum</i> | 51  | 379  | 429  |
| LinJ26_V3.0510 | <i>L. infantum</i> | 41  | 19   | 59   |
| LinJ26_V3.0510 | <i>L. infantum</i> | 49  | 149  | 197  |
| LinJ26_V3.0510 | <i>L. infantum</i> | 60  | 629  | 688  |
| LinJ26_V3.0510 | <i>L. infantum</i> | 49  | 784  | 832  |
| LinJ26_V3.0510 | <i>L. infantum</i> | 77  | 1027 | 1103 |
| LinJ26_V3.0520 | <i>L. infantum</i> | 96  | 1    | 96   |
| LinJ26_V3.0520 | <i>L. infantum</i> | 43  | 272  | 314  |
| LinJ26_V3.0530 | <i>L. infantum</i> | 125 | 1    | 125  |
| LinJ26_V3.0530 | <i>L. infantum</i> | 226 | 318  | 543  |
| LinJ26_V3.0550 | <i>L. infantum</i> | 91  | 66   | 156  |
| LinJ26_V3.0550 | <i>L. infantum</i> | 73  | 247  | 319  |
| LinJ26_V3.0550 | <i>L. infantum</i> | 49  | 345  | 393  |
| LinJ26_V3.0550 | <i>L. infantum</i> | 64  | 515  | 578  |
| LinJ26_V3.0560 | <i>L. infantum</i> | 111 | 1    | 111  |
| LinJ26_V3.0560 | <i>L. infantum</i> | 75  | 147  | 221  |
| LinJ26_V3.0560 | <i>L. infantum</i> | 104 | 427  | 530  |
| LinJ26_V3.0560 | <i>L. infantum</i> | 69  | 635  | 703  |
| LinJ26_V3.0570 | <i>L. infantum</i> | 125 | 64   | 188  |
| LinJ26_V3.0570 | <i>L. infantum</i> | 114 | 219  | 332  |
| LinJ26_V3.0580 | <i>L. infantum</i> | 102 | 15   | 116  |
| LinJ26_V3.0620 | <i>L. infantum</i> | 82  | 469  | 550  |
| LinJ26_V3.0620 | <i>L. infantum</i> | 62  | 1133 | 1194 |
| LinJ26_V3.0620 | <i>L. infantum</i> | 62  | 1133 | 1194 |
| LinJ26_V3.0630 | <i>L. infantum</i> | 58  | 293  | 350  |
| LinJ26_V3.0640 | <i>L. infantum</i> | 57  | 58   | 114  |
| LinJ26_V3.0650 | <i>L. infantum</i> | 40  | 186  | 225  |
| LinJ26_V3.0660 | <i>L. infantum</i> | 41  | 1    | 41   |
| LinJ26_V3.0660 | <i>L. infantum</i> | 118 | 84   | 201  |
| LinJ26_V3.0660 | <i>L. infantum</i> | 118 | 84   | 201  |
| LinJ26_V3.0670 | <i>L. infantum</i> | 97  | 34   | 130  |
| LinJ26_V3.0670 | <i>L. infantum</i> | 126 | 143  | 268  |
| LinJ26_V3.0670 | <i>L. infantum</i> | 49  | 283  | 331  |
| LinJ26_V3.0670 | <i>L. infantum</i> | 72  | 439  | 510  |
| LinJ26_V3.0680 | <i>L. infantum</i> | 147 | 1    | 147  |
| LinJ26_V3.0680 | <i>L. infantum</i> | 76  | 439  | 514  |
| LinJ26_V3.0680 | <i>L. infantum</i> | 55  | 582  | 636  |
| LinJ26_V3.0680 | <i>L. infantum</i> | 47  | 749  | 795  |
| LinJ26_V3.0690 | <i>L. infantum</i> | 62  | 62   | 123  |
| LinJ26_V3.0690 | <i>L. infantum</i> | 51  | 176  | 226  |
| LinJ26_V3.0690 | <i>L. infantum</i> | 106 | 230  | 335  |
| LinJ26_V3.0690 | <i>L. infantum</i> | 141 | 468  | 608  |
| LinJ26_V3.0690 | <i>L. infantum</i> | 84  | 847  | 930  |
| LinJ26_V3.0690 | <i>L. infantum</i> | 67  | 1024 | 1090 |
| LinJ26_V3.0700 | <i>L. infantum</i> | 123 | 1    | 123  |
| LinJ26_V3.0700 | <i>L. infantum</i> | 420 | 133  | 552  |
| LinJ26_V3.0700 | <i>L. infantum</i> | 55  | 564  | 618  |

|                |                    |     |      |      |
|----------------|--------------------|-----|------|------|
| LinJ26_V3.0700 | <i>L. infantum</i> | 46  | 630  | 675  |
| LinJ26_V3.0700 | <i>L. infantum</i> | 191 | 700  | 890  |
| LinJ26_V3.0700 | <i>L. infantum</i> | 122 | 903  | 1024 |
| LinJ26_V3.0700 | <i>L. infantum</i> | 71  | 1113 | 1183 |
| LinJ26_V3.0700 | <i>L. infantum</i> | 198 | 1423 | 1620 |
| LinJ26_V3.0700 | <i>L. infantum</i> | 145 | 1727 | 1871 |
| LinJ26_V3.0740 | <i>L. infantum</i> | 444 | 101  | 544  |
| LinJ26_V3.0800 | <i>L. infantum</i> | 294 | 115  | 408  |
| LinJ26_V3.0800 | <i>L. infantum</i> | 50  | 600  | 649  |
| LinJ26_V3.0800 | <i>L. infantum</i> | 44  | 673  | 716  |
| LinJ26_V3.0800 | <i>L. infantum</i> | 45  | 840  | 884  |
| LinJ26_V3.0810 | <i>L. infantum</i> | 40  | 128  | 167  |
| LinJ26_V3.0810 | <i>L. infantum</i> | 75  | 247  | 321  |
| LinJ26_V3.0810 | <i>L. infantum</i> | 75  | 247  | 321  |
| LinJ26_V3.0820 | <i>L. infantum</i> | 45  | 340  | 384  |
| LinJ26_V3.0820 | <i>L. infantum</i> | 67  | 609  | 675  |
| LinJ26_V3.0820 | <i>L. infantum</i> | 67  | 609  | 675  |
| LinJ26_V3.0830 | <i>L. infantum</i> | 414 | 166  | 579  |
| LinJ26_V3.0830 | <i>L. infantum</i> | 99  | 603  | 701  |
| LinJ26_V3.0830 | <i>L. infantum</i> | 89  | 721  | 809  |
| LinJ26_V3.0860 | <i>L. infantum</i> | 62  | 1    | 62   |
| LinJ26_V3.0860 | <i>L. infantum</i> | 45  | 103  | 147  |
| LinJ26_V3.0860 | <i>L. infantum</i> | 45  | 103  | 147  |
| LinJ26_V3.0870 | <i>L. infantum</i> | 92  | 1    | 92   |
| LinJ26_V3.0870 | <i>L. infantum</i> | 57  | 275  | 331  |
| LinJ26_V3.0880 | <i>L. infantum</i> | 45  | 58   | 102  |
| LinJ26_V3.0900 | <i>L. infantum</i> | 141 | 237  | 377  |
| LinJ26_V3.0910 | <i>L. infantum</i> | 140 | 146  | 285  |
| LinJ26_V3.0910 | <i>L. infantum</i> | 109 | 294  | 402  |
| LinJ26_V3.0920 | <i>L. infantum</i> | 388 | 1    | 388  |
| LinJ26_V3.0930 | <i>L. infantum</i> | 44  | 1    | 44   |
| LinJ26_V3.0930 | <i>L. infantum</i> | 49  | 204  | 252  |
| LinJ26_V3.0930 | <i>L. infantum</i> | 41  | 300  | 340  |
| LinJ26_V3.0930 | <i>L. infantum</i> | 102 | 890  | 991  |
| LinJ26_V3.0930 | <i>L. infantum</i> | 61  | 1169 | 1229 |
| LinJ26_V3.0930 | <i>L. infantum</i> | 53  | 1265 | 1317 |
| LinJ26_V3.0930 | <i>L. infantum</i> | 54  | 1432 | 1485 |
| LinJ26_V3.0940 | <i>L. infantum</i> | 126 | 438  | 563  |
| LinJ26_V3.0950 | <i>L. infantum</i> | 921 | 1    | 921  |
| LinJ26_V3.0960 | <i>L. infantum</i> | 117 | 474  | 590  |
| LinJ26_V3.0970 | <i>L. infantum</i> | 77  | 1    | 77   |
| LinJ26_V3.0970 | <i>L. infantum</i> | 68  | 79   | 146  |
| LinJ26_V3.0970 | <i>L. infantum</i> | 43  | 178  | 220  |
| LinJ26_V3.0980 | <i>L. infantum</i> | 60  | 279  | 338  |
| LinJ26_V3.0980 | <i>L. infantum</i> | 42  | 369  | 410  |
| LinJ26_V3.0980 | <i>L. infantum</i> | 42  | 369  | 410  |
| LinJ26_V3.1000 | <i>L. infantum</i> | 47  | 1    | 47   |

|                |                    |     |      |      |
|----------------|--------------------|-----|------|------|
| LinJ26_V3.1000 | <i>L. infantum</i> | 43  | 596  | 638  |
| LinJ26_V3.1000 | <i>L. infantum</i> | 45  | 1831 | 1875 |
| LinJ26_V3.1000 | <i>L. infantum</i> | 75  | 2625 | 2699 |
| LinJ26_V3.1000 | <i>L. infantum</i> | 55  | 2832 | 2886 |
| LinJ26_V3.1010 | <i>L. infantum</i> | 57  | 311  | 367  |
| LinJ26_V3.1020 | <i>L. infantum</i> | 48  | 161  | 208  |
| LinJ26_V3.1040 | <i>L. infantum</i> | 227 | 102  | 328  |
| LinJ26_V3.1050 | <i>L. infantum</i> | 123 | 1    | 123  |
| LinJ26_V3.1050 | <i>L. infantum</i> | 111 | 137  | 247  |
| LinJ26_V3.1050 | <i>L. infantum</i> | 48  | 463  | 510  |
| LinJ26_V3.1060 | <i>L. infantum</i> | 78  | 1    | 78   |
| LinJ26_V3.1060 | <i>L. infantum</i> | 106 | 96   | 201  |
| LinJ26_V3.1060 | <i>L. infantum</i> | 44  | 215  | 258  |
| LinJ26_V3.1060 | <i>L. infantum</i> | 296 | 264  | 559  |
| LinJ26_V3.1060 | <i>L. infantum</i> | 140 | 579  | 718  |
| LinJ26_V3.1060 | <i>L. infantum</i> | 78  | 756  | 833  |
| LinJ26_V3.1060 | <i>L. infantum</i> | 50  | 857  | 906  |
| LinJ26_V3.1060 | <i>L. infantum</i> | 143 | 925  | 1067 |
| LinJ26_V3.1060 | <i>L. infantum</i> | 93  | 1088 | 1180 |
| LinJ26_V3.1060 | <i>L. infantum</i> | 42  | 1322 | 1363 |
| LinJ26_V3.1060 | <i>L. infantum</i> | 67  | 1402 | 1468 |
| LinJ26_V3.1060 | <i>L. infantum</i> | 95  | 1529 | 1623 |
| LinJ26_V3.1070 | <i>L. infantum</i> | 111 | 1    | 111  |
| LinJ26_V3.1090 | <i>L. infantum</i> | 41  | 31   | 71   |
| LinJ26_V3.1090 | <i>L. infantum</i> | 80  | 165  | 244  |
| LinJ26_V3.1090 | <i>L. infantum</i> | 51  | 262  | 312  |
| LinJ26_V3.1090 | <i>L. infantum</i> | 49  | 368  | 416  |
| LinJ26_V3.1090 | <i>L. infantum</i> | 43  | 536  | 578  |
| LinJ26_V3.1090 | <i>L. infantum</i> | 79  | 696  | 774  |
| LinJ26_V3.1090 | <i>L. infantum</i> | 55  | 858  | 912  |
| LinJ26_V3.1090 | <i>L. infantum</i> | 65  | 984  | 1048 |
| LinJ26_V3.1090 | <i>L. infantum</i> | 101 | 1065 | 1165 |
| LinJ26_V3.1090 | <i>L. infantum</i> | 68  | 1174 | 1241 |
| LinJ26_V3.1090 | <i>L. infantum</i> | 88  | 1457 | 1544 |
| LinJ26_V3.1090 | <i>L. infantum</i> | 53  | 1581 | 1633 |
| LinJ26_V3.1090 | <i>L. infantum</i> | 101 | 1675 | 1775 |
| LinJ26_V3.1090 | <i>L. infantum</i> | 43  | 2339 | 2381 |
| LinJ26_V3.1090 | <i>L. infantum</i> | 91  | 2416 | 2506 |
| LinJ26_V3.1090 | <i>L. infantum</i> | 85  | 2592 | 2676 |
| LinJ26_V3.1090 | <i>L. infantum</i> | 56  | 2699 | 2754 |
| LinJ26_V3.1090 | <i>L. infantum</i> | 54  | 3085 | 3138 |
| LinJ26_V3.1090 | <i>L. infantum</i> | 168 | 3167 | 3334 |
| LinJ26_V3.1090 | <i>L. infantum</i> | 91  | 3423 | 3513 |
| LinJ26_V3.1090 | <i>L. infantum</i> | 72  | 3592 | 3663 |
| LinJ26_V3.1090 | <i>L. infantum</i> | 40  | 3665 | 3704 |
| LinJ26_V3.1090 | <i>L. infantum</i> | 186 | 3809 | 3994 |
| LinJ26_V3.1090 | <i>L. infantum</i> | 118 | 4005 | 4122 |



|                |                    |     |      |      |
|----------------|--------------------|-----|------|------|
| LinJ26_V3.1100 | <i>L. infantum</i> | 110 | 67   | 176  |
| LinJ26_V3.1100 | <i>L. infantum</i> | 57  | 235  | 291  |
| LinJ26_V3.1100 | <i>L. infantum</i> | 70  | 397  | 466  |
| LinJ26_V3.1110 | <i>L. infantum</i> | 430 | 1    | 430  |
| LinJ26_V3.1110 | <i>L. infantum</i> | 225 | 560  | 784  |
| LinJ26_V3.1110 | <i>L. infantum</i> | 432 | 799  | 1230 |
| LinJ26_V3.1110 | <i>L. infantum</i> | 204 | 1252 | 1455 |
| LinJ26_V3.1110 | <i>L. infantum</i> | 139 | 1521 | 1659 |
| LinJ26_V3.1120 | <i>L. infantum</i> | 92  | 20   | 111  |
| LinJ26_V3.1120 | <i>L. infantum</i> | 40  | 127  | 166  |
| LinJ26_V3.1120 | <i>L. infantum</i> | 40  | 127  | 166  |
| LinJ26_V3.1130 | <i>L. infantum</i> | 54  | 132  | 185  |
| LinJ26_V3.1130 | <i>L. infantum</i> | 70  | 235  | 304  |
| LinJ26_V3.1130 | <i>L. infantum</i> | 146 | 513  | 658  |
| LinJ26_V3.1140 | <i>L. infantum</i> | 88  | 70   | 157  |
| LinJ26_V3.1140 | <i>L. infantum</i> | 136 | 180  | 315  |
| LinJ26_V3.1140 | <i>L. infantum</i> | 43  | 346  | 388  |
| LinJ26_V3.1140 | <i>L. infantum</i> | 57  | 454  | 510  |
| LinJ26_V3.1140 | <i>L. infantum</i> | 98  | 532  | 629  |
| LinJ26_V3.1140 | <i>L. infantum</i> | 80  | 678  | 757  |
| LinJ26_V3.1150 | <i>L. infantum</i> | 130 | 20   | 149  |
| LinJ26_V3.1150 | <i>L. infantum</i> | 120 | 224  | 343  |
| LinJ26_V3.1150 | <i>L. infantum</i> | 166 | 363  | 528  |
| LinJ26_V3.1160 | <i>L. infantum</i> | 54  | 1    | 54   |
| LinJ26_V3.1160 | <i>L. infantum</i> | 54  | 90   | 143  |
| LinJ26_V3.1160 | <i>L. infantum</i> | 48  | 165  | 212  |
| LinJ26_V3.1160 | <i>L. infantum</i> | 53  | 246  | 298  |
| LinJ26_V3.1160 | <i>L. infantum</i> | 74  | 390  | 463  |
| LinJ26_V3.1160 | <i>L. infantum</i> | 46  | 563  | 608  |
| LinJ26_V3.1170 | <i>L. infantum</i> | 177 | 22   | 198  |
| LinJ26_V3.1170 | <i>L. infantum</i> | 403 | 207  | 609  |
| LinJ26_V3.1170 | <i>L. infantum</i> | 66  | 640  | 705  |
| LinJ26_V3.1170 | <i>L. infantum</i> | 53  | 741  | 793  |
| LinJ26_V3.1170 | <i>L. infantum</i> | 404 | 921  | 1324 |
| LinJ26_V3.1170 | <i>L. infantum</i> | 48  | 1361 | 1408 |
| LinJ26_V3.1170 | <i>L. infantum</i> | 141 | 1493 | 1633 |
| LinJ26_V3.1170 | <i>L. infantum</i> | 75  | 1645 | 1719 |
| LinJ26_V3.1180 | <i>L. infantum</i> | 47  | 35   | 81   |
| LinJ26_V3.1180 | <i>L. infantum</i> | 42  | 239  | 280  |
| LinJ26_V3.1180 | <i>L. infantum</i> | 49  | 311  | 359  |
| LinJ26_V3.1190 | <i>L. infantum</i> | 67  | 323  | 389  |
| LinJ26_V3.1200 | <i>L. infantum</i> | 65  | 111  | 175  |
| LinJ26_V3.1200 | <i>L. infantum</i> | 61  | 225  | 285  |
| LinJ26_V3.1200 | <i>L. infantum</i> | 56  | 316  | 371  |
| LinJ26_V3.1200 | <i>L. infantum</i> | 47  | 462  | 508  |
| LinJ26_V3.1200 | <i>L. infantum</i> | 154 | 515  | 668  |
| LinJ26_V3.1210 | <i>L. infantum</i> | 94  | 1    | 94   |

|                |                    |     |      |      |
|----------------|--------------------|-----|------|------|
| LinJ26_V3.1210 | <i>L. infantum</i> | 47  | 276  | 322  |
| LinJ26_V3.1210 | <i>L. infantum</i> | 148 | 427  | 574  |
| LinJ26_V3.1210 | <i>L. infantum</i> | 132 | 614  | 745  |
| LinJ26_V3.1210 | <i>L. infantum</i> | 49  | 807  | 855  |
| LinJ26_V3.1210 | <i>L. infantum</i> | 87  | 1035 | 1121 |
| LinJ26_V3.1210 | <i>L. infantum</i> | 83  | 1212 | 1294 |
| LinJ26_V3.1210 | <i>L. infantum</i> | 45  | 1305 | 1349 |
| LinJ26_V3.1210 | <i>L. infantum</i> | 65  | 1393 | 1457 |
| LinJ26_V3.1210 | <i>L. infantum</i> | 553 | 1661 | 2213 |
| LinJ26_V3.1210 | <i>L. infantum</i> | 173 | 2265 | 2437 |
| LinJ26_V3.1210 | <i>L. infantum</i> | 60  | 2467 | 2526 |
| LinJ26_V3.1210 | <i>L. infantum</i> | 113 | 2639 | 2751 |
| LinJ26_V3.1210 | <i>L. infantum</i> | 68  | 2875 | 2942 |
| LinJ26_V3.1220 | <i>L. infantum</i> | 105 | 495  | 599  |
| LinJ26_V3.1230 | <i>L. infantum</i> | 217 | 450  | 666  |
| LinJ26_V3.1240 | <i>L. infantum</i> | 274 | 41   | 314  |
| LinJ26_V3.1240 | <i>L. infantum</i> | 97  | 332  | 428  |
| LinJ26_V3.1240 | <i>L. infantum</i> | 193 | 507  | 699  |
| LinJ26_V3.1240 | <i>L. infantum</i> | 134 | 709  | 842  |
| LinJ26_V3.1240 | <i>L. infantum</i> | 93  | 848  | 940  |
| LinJ26_V3.1240 | <i>L. infantum</i> | 52  | 968  | 1019 |
| LinJ26_V3.1240 | <i>L. infantum</i> | 105 | 1265 | 1369 |
| LinJ26_V3.1240 | <i>L. infantum</i> | 124 | 1392 | 1515 |
| LinJ26_V3.1240 | <i>L. infantum</i> | 76  | 1548 | 1623 |
| LinJ26_V3.1250 | <i>L. infantum</i> | 59  | 1    | 59   |
| LinJ26_V3.1250 | <i>L. infantum</i> | 58  | 336  | 393  |
| LinJ26_V3.1250 | <i>L. infantum</i> | 40  | 421  | 460  |
| LinJ26_V3.1250 | <i>L. infantum</i> | 120 | 554  | 673  |
| LinJ26_V3.1260 | <i>L. infantum</i> | 253 | 50   | 302  |
| LinJ26_V3.1260 | <i>L. infantum</i> | 44  | 419  | 462  |
| LinJ26_V3.1260 | <i>L. infantum</i> | 42  | 505  | 546  |
| LinJ26_V3.1260 | <i>L. infantum</i> | 77  | 693  | 769  |
| LinJ26_V3.1260 | <i>L. infantum</i> | 164 | 850  | 1013 |
| LinJ26_V3.1270 | <i>L. infantum</i> | 57  | 44   | 100  |
| LinJ26_V3.1270 | <i>L. infantum</i> | 72  | 143  | 214  |
| LinJ26_V3.1270 | <i>L. infantum</i> | 56  | 452  | 507  |
| LinJ26_V3.1280 | <i>L. infantum</i> | 61  | 180  | 240  |
| LinJ26_V3.1280 | <i>L. infantum</i> | 83  | 249  | 331  |
| LinJ26_V3.1280 | <i>L. infantum</i> | 104 | 401  | 504  |
| LinJ26_V3.1280 | <i>L. infantum</i> | 57  | 593  | 649  |
| LinJ26_V3.1280 | <i>L. infantum</i> | 58  | 718  | 775  |
| LinJ26_V3.1280 | <i>L. infantum</i> | 325 | 867  | 1191 |
| LinJ26_V3.1290 | <i>L. infantum</i> | 62  | 106  | 167  |
| LinJ26_V3.1300 | <i>L. infantum</i> | 99  | 1    | 99   |
| LinJ26_V3.1300 | <i>L. infantum</i> | 48  | 231  | 278  |
| LinJ26_V3.1300 | <i>L. infantum</i> | 48  | 231  | 278  |
| LinJ26_V3.1310 | <i>L. infantum</i> | 53  | 244  | 296  |

|                |                    |     |      |      |
|----------------|--------------------|-----|------|------|
| LinJ26_V3.1310 | <i>L. infantum</i> | 58  | 354  | 411  |
| LinJ26_V3.1310 | <i>L. infantum</i> | 58  | 354  | 411  |
| LinJ26_V3.1320 | <i>L. infantum</i> | 63  | 1    | 63   |
| LinJ26_V3.1320 | <i>L. infantum</i> | 71  | 118  | 188  |
| LinJ26_V3.1320 | <i>L. infantum</i> | 49  | 479  | 527  |
| LinJ26_V3.1340 | <i>L. infantum</i> | 55  | 28   | 82   |
| LinJ26_V3.1340 | <i>L. infantum</i> | 61  | 137  | 197  |
| LinJ26_V3.1340 | <i>L. infantum</i> | 61  | 137  | 197  |
| LinJ26_V3.1350 | <i>L. infantum</i> | 129 | 1    | 129  |
| LinJ26_V3.1350 | <i>L. infantum</i> | 79  | 271  | 349  |
| LinJ26_V3.1350 | <i>L. infantum</i> | 114 | 469  | 582  |
| LinJ26_V3.1350 | <i>L. infantum</i> | 91  | 621  | 711  |
| LinJ26_V3.1370 | <i>L. infantum</i> | 206 | 1    | 206  |
| LinJ26_V3.1370 | <i>L. infantum</i> | 68  | 274  | 341  |
| LinJ26_V3.1370 | <i>L. infantum</i> | 65  | 408  | 472  |
| LinJ26_V3.1370 | <i>L. infantum</i> | 58  | 478  | 535  |
| LinJ26_V3.1370 | <i>L. infantum</i> | 132 | 575  | 706  |
| LinJ26_V3.1370 | <i>L. infantum</i> | 64  | 723  | 786  |
| LinJ26_V3.1370 | <i>L. infantum</i> | 66  | 887  | 952  |
| LinJ26_V3.1370 | <i>L. infantum</i> | 48  | 1029 | 1076 |
| LinJ26_V3.1380 | <i>L. infantum</i> | 64  | 1    | 64   |
| LinJ26_V3.1380 | <i>L. infantum</i> | 79  | 167  | 245  |
| LinJ26_V3.1390 | <i>L. infantum</i> | 65  | 133  | 197  |
| LinJ26_V3.1390 | <i>L. infantum</i> | 72  | 325  | 396  |
| LinJ26_V3.1390 | <i>L. infantum</i> | 49  | 436  | 484  |
| LinJ26_V3.1400 | <i>L. infantum</i> | 61  | 406  | 466  |
| LinJ26_V3.1400 | <i>L. infantum</i> | 52  | 594  | 645  |
| LinJ26_V3.1400 | <i>L. infantum</i> | 61  | 690  | 750  |
| LinJ26_V3.1400 | <i>L. infantum</i> | 48  | 837  | 884  |
| LinJ26_V3.1400 | <i>L. infantum</i> | 91  | 964  | 1054 |
| LinJ26_V3.1400 | <i>L. infantum</i> | 76  | 1131 | 1206 |
| LinJ26_V3.1400 | <i>L. infantum</i> | 185 | 1318 | 1502 |
| LinJ26_V3.1400 | <i>L. infantum</i> | 65  | 1876 | 1940 |
| LinJ26_V3.1400 | <i>L. infantum</i> | 252 | 2000 | 2251 |
| LinJ26_V3.1400 | <i>L. infantum</i> | 117 | 2269 | 2385 |
| LinJ26_V3.1410 | <i>L. infantum</i> | 177 | 1    | 177  |
| LinJ26_V3.1410 | <i>L. infantum</i> | 221 | 185  | 405  |
| LinJ26_V3.1410 | <i>L. infantum</i> | 554 | 434  | 987  |
| LinJ26_V3.1410 | <i>L. infantum</i> | 84  | 994  | 1077 |
| LinJ26_V3.1420 | <i>L. infantum</i> | 136 | 71   | 206  |
| LinJ26_V3.1420 | <i>L. infantum</i> | 112 | 307  | 418  |
| LinJ26_V3.1420 | <i>L. infantum</i> | 73  | 623  | 695  |
| LinJ26_V3.1430 | <i>L. infantum</i> | 84  | 1    | 84   |
| LinJ26_V3.1430 | <i>L. infantum</i> | 224 | 90   | 313  |
| LinJ26_V3.1430 | <i>L. infantum</i> | 64  | 469  | 532  |
| LinJ26_V3.1430 | <i>L. infantum</i> | 307 | 563  | 869  |
| LinJ26_V3.1430 | <i>L. infantum</i> | 131 | 989  | 1119 |

|                |                    |     |      |      |
|----------------|--------------------|-----|------|------|
| LinJ26_V3.1440 | <i>L. infantum</i> | 82  | 257  | 338  |
| LinJ26_V3.1450 | <i>L. infantum</i> | 58  | 28   | 85   |
| LinJ26_V3.1450 | <i>L. infantum</i> | 68  | 177  | 244  |
| LinJ26_V3.1450 | <i>L. infantum</i> | 68  | 177  | 244  |
| LinJ26_V3.1460 | <i>L. infantum</i> | 49  | 1    | 49   |
| LinJ26_V3.1460 | <i>L. infantum</i> | 75  | 78   | 152  |
| LinJ26_V3.1460 | <i>L. infantum</i> | 89  | 200  | 288  |
| LinJ26_V3.1460 | <i>L. infantum</i> | 70  | 425  | 494  |
| LinJ26_V3.1460 | <i>L. infantum</i> | 82  | 796  | 877  |
| LinJ26_V3.1460 | <i>L. infantum</i> | 40  | 910  | 949  |
| LinJ26_V3.1470 | <i>L. infantum</i> | 50  | 396  | 445  |
| LinJ26_V3.1490 | <i>L. infantum</i> | 380 | 112  | 491  |
| LinJ26_V3.1490 | <i>L. infantum</i> | 171 | 521  | 691  |
| LinJ26_V3.1490 | <i>L. infantum</i> | 247 | 693  | 939  |
| LinJ26_V3.1490 | <i>L. infantum</i> | 42  | 981  | 1022 |
| LinJ26_V3.1490 | <i>L. infantum</i> | 160 | 1063 | 1222 |
| LinJ26_V3.1490 | <i>L. infantum</i> | 71  | 1242 | 1312 |
| LinJ26_V3.1490 | <i>L. infantum</i> | 161 | 1316 | 1476 |
| LinJ26_V3.1490 | <i>L. infantum</i> | 68  | 1521 | 1588 |
| LinJ26_V3.1510 | <i>L. infantum</i> | 99  | 1    | 99   |
| LinJ26_V3.1540 | <i>L. infantum</i> | 164 | 1    | 164  |
| LinJ26_V3.1540 | <i>L. infantum</i> | 51  | 1016 | 1066 |
| LinJ26_V3.1540 | <i>L. infantum</i> | 43  | 1614 | 1656 |
| LinJ26_V3.1540 | <i>L. infantum</i> | 41  | 1816 | 1856 |
| LinJ26_V3.1560 | <i>L. infantum</i> | 44  | 1    | 44   |
| LinJ26_V3.1580 | <i>L. infantum</i> | 174 | 423  | 596  |
| LinJ26_V3.1600 | <i>L. infantum</i> | 59  | 1    | 59   |
| LinJ26_V3.1650 | <i>L. infantum</i> | 60  | 29   | 88   |
| LinJ26_V3.1660 | <i>L. infantum</i> | 57  | 205  | 261  |
| LinJ26_V3.1700 | <i>L. infantum</i> | 96  | 31   | 126  |
| LinJ26_V3.1700 | <i>L. infantum</i> | 97  | 362  | 458  |
| LinJ26_V3.1700 | <i>L. infantum</i> | 183 | 524  | 706  |
| LinJ26_V3.1720 | <i>L. infantum</i> | 99  | 29   | 127  |
| LinJ26_V3.1730 | <i>L. infantum</i> | 65  | 63   | 127  |
| LinJ26_V3.1740 | <i>L. infantum</i> | 100 | 1    | 100  |
| LinJ26_V3.1740 | <i>L. infantum</i> | 147 | 149  | 295  |
| LinJ26_V3.1740 | <i>L. infantum</i> | 56  | 332  | 387  |
| LinJ26_V3.1740 | <i>L. infantum</i> | 43  | 433  | 475  |
| LinJ26_V3.1750 | <i>L. infantum</i> | 50  | 57   | 106  |
| LinJ26_V3.1760 | <i>L. infantum</i> | 172 | 1    | 172  |
| LinJ26_V3.1760 | <i>L. infantum</i> | 44  | 233  | 276  |
| LinJ26_V3.1770 | <i>L. infantum</i> | 44  | 150  | 193  |
| LinJ26_V3.1780 | <i>L. infantum</i> | 100 | 100  | 199  |
| LinJ26_V3.1780 | <i>L. infantum</i> | 105 | 225  | 329  |
| LinJ26_V3.1790 | <i>L. infantum</i> | 41  | 1    | 41   |
| LinJ26_V3.1790 | <i>L. infantum</i> | 74  | 737  | 810  |
| LinJ26_V3.1790 | <i>L. infantum</i> | 44  | 1119 | 1162 |

|                |                    |      |      |      |
|----------------|--------------------|------|------|------|
| LinJ26_V3.1790 | <i>L. infantum</i> | 110  | 1439 | 1548 |
| LinJ26_V3.1790 | <i>L. infantum</i> | 41   | 1695 | 1735 |
| LinJ26_V3.1790 | <i>L. infantum</i> | 101  | 1892 | 1992 |
| LinJ26_V3.1800 | <i>L. infantum</i> | 52   | 1    | 52   |
| LinJ26_V3.1810 | <i>L. infantum</i> | 45   | 1    | 45   |
| LinJ26_V3.1810 | <i>L. infantum</i> | 307  | 92   | 398  |
| LinJ26_V3.1810 | <i>L. infantum</i> | 41   | 458  | 498  |
| LinJ26_V3.1820 | <i>L. infantum</i> | 1078 | 1    | 1078 |
| LinJ26_V3.1820 | <i>L. infantum</i> | 303  | 1099 | 1401 |
| LinJ26_V3.1820 | <i>L. infantum</i> | 168  | 1427 | 1594 |
| LinJ26_V3.1820 | <i>L. infantum</i> | 78   | 1646 | 1723 |
| LinJ26_V3.1820 | <i>L. infantum</i> | 62   | 1792 | 1853 |
| LinJ26_V3.1820 | <i>L. infantum</i> | 95   | 1993 | 2087 |
| LinJ26_V3.1820 | <i>L. infantum</i> | 53   | 2128 | 2180 |
| LinJ26_V3.1820 | <i>L. infantum</i> | 98   | 2216 | 2313 |
| LinJ26_V3.1820 | <i>L. infantum</i> | 51   | 2334 | 2384 |
| LinJ26_V3.1830 | <i>L. infantum</i> | 145  | 1    | 145  |
| LinJ26_V3.1830 | <i>L. infantum</i> | 228  | 359  | 586  |
| LinJ26_V3.1840 | <i>L. infantum</i> | 113  | 82   | 194  |
| LinJ26_V3.1840 | <i>L. infantum</i> | 92   | 229  | 320  |
| LinJ26_V3.1840 | <i>L. infantum</i> | 70   | 329  | 398  |
| LinJ26_V3.1840 | <i>L. infantum</i> | 45   | 427  | 471  |
| LinJ26_V3.1840 | <i>L. infantum</i> | 70   | 534  | 603  |
| LinJ26_V3.1840 | <i>L. infantum</i> | 65   | 661  | 725  |
| LinJ26_V3.1840 | <i>L. infantum</i> | 94   | 772  | 865  |
| LinJ26_V3.1850 | <i>L. infantum</i> | 42   | 1    | 42   |
| LinJ26_V3.1860 | <i>L. infantum</i> | 51   | 1    | 51   |
| LinJ26_V3.1860 | <i>L. infantum</i> | 140  | 88   | 227  |
| LinJ26_V3.1860 | <i>L. infantum</i> | 52   | 466  | 517  |
| LinJ26_V3.1880 | <i>L. infantum</i> | 297  | 1    | 297  |
| LinJ26_V3.1880 | <i>L. infantum</i> | 53   | 389  | 441  |
| LinJ26_V3.1880 | <i>L. infantum</i> | 52   | 524  | 575  |
| LinJ26_V3.1880 | <i>L. infantum</i> | 62   | 612  | 673  |
| LinJ26_V3.1880 | <i>L. infantum</i> | 110  | 934  | 1043 |
| LinJ26_V3.1880 | <i>L. infantum</i> | 218  | 1070 | 1287 |
| LinJ26_V3.1880 | <i>L. infantum</i> | 85   | 1363 | 1447 |
| LinJ26_V3.1880 | <i>L. infantum</i> | 323  | 1617 | 1939 |
| LinJ26_V3.1880 | <i>L. infantum</i> | 46   | 1983 | 2028 |
| LinJ26_V3.1880 | <i>L. infantum</i> | 380  | 2180 | 2559 |
| LinJ26_V3.1880 | <i>L. infantum</i> | 75   | 2648 | 2722 |
| LinJ26_V3.1890 | <i>L. infantum</i> | 74   | 65   | 138  |
| LinJ26_V3.1890 | <i>L. infantum</i> | 59   | 178  | 236  |
| LinJ26_V3.1890 | <i>L. infantum</i> | 117  | 526  | 642  |
| LinJ26_V3.1900 | <i>L. infantum</i> | 61   | 73   | 133  |
| LinJ26_V3.1900 | <i>L. infantum</i> | 82   | 212  | 293  |
| LinJ26_V3.1910 | <i>L. infantum</i> | 71   | 140  | 210  |
| LinJ26_V3.1910 | <i>L. infantum</i> | 44   | 504  | 547  |

|                |                    |     |      |      |
|----------------|--------------------|-----|------|------|
| LinJ26_V3.1910 | <i>L. infantum</i> | 66  | 1058 | 1123 |
| LinJ26_V3.1920 | <i>L. infantum</i> | 69  | 115  | 183  |
| LinJ26_V3.1930 | <i>L. infantum</i> | 244 | 1    | 244  |
| LinJ26_V3.1930 | <i>L. infantum</i> | 163 | 290  | 452  |
| LinJ26_V3.1930 | <i>L. infantum</i> | 161 | 456  | 616  |
| LinJ26_V3.1930 | <i>L. infantum</i> | 44  | 830  | 873  |
| LinJ26_V3.1930 | <i>L. infantum</i> | 125 | 891  | 1015 |
| LinJ26_V3.1930 | <i>L. infantum</i> | 51  | 1033 | 1083 |
| LinJ26_V3.1930 | <i>L. infantum</i> | 84  | 1134 | 1217 |
| LinJ26_V3.1930 | <i>L. infantum</i> | 42  | 1340 | 1381 |
| LinJ26_V3.1930 | <i>L. infantum</i> | 73  | 1589 | 1661 |
| LinJ26_V3.1930 | <i>L. infantum</i> | 58  | 1716 | 1773 |
| LinJ26_V3.1940 | <i>L. infantum</i> | 52  | 290  | 341  |
| LinJ26_V3.1950 | <i>L. infantum</i> | 60  | 79   | 138  |
| LinJ26_V3.1950 | <i>L. infantum</i> | 85  | 241  | 325  |
| LinJ26_V3.1950 | <i>L. infantum</i> | 88  | 376  | 463  |
| LinJ26_V3.1950 | <i>L. infantum</i> | 62  | 518  | 579  |
| LinJ26_V3.1950 | <i>L. infantum</i> | 47  | 1006 | 1052 |
| LinJ26_V3.1950 | <i>L. infantum</i> | 46  | 1705 | 1750 |
| LinJ26_V3.1950 | <i>L. infantum</i> | 72  | 2461 | 2532 |
| LinJ26_V3.1960 | <i>L. infantum</i> | 73  | 82   | 154  |
| LinJ26_V3.1960 | <i>L. infantum</i> | 75  | 228  | 302  |
| LinJ26_V3.1960 | <i>L. infantum</i> | 64  | 418  | 481  |
| LinJ26_V3.1960 | <i>L. infantum</i> | 119 | 685  | 803  |
| LinJ26_V3.1970 | <i>L. infantum</i> | 63  | 370  | 432  |
| LinJ26_V3.1980 | <i>L. infantum</i> | 111 | 1    | 111  |
| LinJ26_V3.1990 | <i>L. infantum</i> | 90  | 113  | 202  |
| LinJ26_V3.2000 | <i>L. infantum</i> | 48  | 55   | 102  |
| LinJ26_V3.2010 | <i>L. infantum</i> | 131 | 183  | 313  |
| LinJ26_V3.2010 | <i>L. infantum</i> | 389 | 339  | 727  |
| LinJ26_V3.2030 | <i>L. infantum</i> | 71  | 1    | 71   |
| LinJ26_V3.2030 | <i>L. infantum</i> | 50  | 487  | 536  |
| LinJ26_V3.2030 | <i>L. infantum</i> | 41  | 711  | 751  |
| LinJ26_V3.2040 | <i>L. infantum</i> | 69  | 110  | 178  |
| LinJ26_V3.2050 | <i>L. infantum</i> | 40  | 1    | 40   |
| LinJ26_V3.2050 | <i>L. infantum</i> | 48  | 54   | 101  |
| LinJ26_V3.2050 | <i>L. infantum</i> | 54  | 107  | 160  |
| LinJ26_V3.2050 | <i>L. infantum</i> | 277 | 244  | 520  |
| LinJ26_V3.2050 | <i>L. infantum</i> | 63  | 640  | 702  |
| LinJ26_V3.2050 | <i>L. infantum</i> | 138 | 756  | 893  |
| LinJ26_V3.2060 | <i>L. infantum</i> | 60  | 1    | 60   |
| LinJ26_V3.2060 | <i>L. infantum</i> | 57  | 187  | 243  |
| LinJ26_V3.2060 | <i>L. infantum</i> | 81  | 335  | 415  |
| LinJ26_V3.2060 | <i>L. infantum</i> | 219 | 502  | 720  |
| LinJ26_V3.2060 | <i>L. infantum</i> | 49  | 732  | 780  |
| LinJ26_V3.2060 | <i>L. infantum</i> | 53  | 825  | 877  |
| LinJ26_V3.2070 | <i>L. infantum</i> | 250 | 1    | 250  |

|                |                    |     |      |      |
|----------------|--------------------|-----|------|------|
| LinJ26_V3.2070 | <i>L. infantum</i> | 499 | 255  | 753  |
| LinJ26_V3.2070 | <i>L. infantum</i> | 47  | 777  | 823  |
| LinJ26_V3.2070 | <i>L. infantum</i> | 77  | 1188 | 1264 |
| LinJ26_V3.2080 | <i>L. infantum</i> | 61  | 1    | 61   |
| LinJ26_V3.2080 | <i>L. infantum</i> | 137 | 100  | 236  |
| LinJ26_V3.2100 | <i>L. infantum</i> | 48  | 1    | 48   |
| LinJ26_V3.2100 | <i>L. infantum</i> | 97  | 72   | 168  |
| LinJ26_V3.2100 | <i>L. infantum</i> | 175 | 179  | 353  |
| LinJ26_V3.2100 | <i>L. infantum</i> | 103 | 590  | 692  |
| LinJ26_V3.2100 | <i>L. infantum</i> | 128 | 737  | 864  |
| LinJ26_V3.2110 | <i>L. infantum</i> | 46  | 1    | 46   |
| LinJ26_V3.2110 | <i>L. infantum</i> | 250 | 95   | 344  |
| LinJ26_V3.2110 | <i>L. infantum</i> | 64  | 413  | 476  |
| LinJ26_V3.2110 | <i>L. infantum</i> | 105 | 507  | 611  |
| LinJ26_V3.2110 | <i>L. infantum</i> | 143 | 662  | 804  |
| LinJ26_V3.2110 | <i>L. infantum</i> | 41  | 911  | 951  |
| LinJ26_V3.2110 | <i>L. infantum</i> | 346 | 974  | 1319 |
| LinJ26_V3.2110 | <i>L. infantum</i> | 353 | 1416 | 1768 |
| LinJ26_V3.2120 | <i>L. infantum</i> | 125 | 1    | 125  |
| LinJ26_V3.2120 | <i>L. infantum</i> | 77  | 157  | 233  |
| LinJ26_V3.2120 | <i>L. infantum</i> | 132 | 254  | 385  |
| LinJ26_V3.2120 | <i>L. infantum</i> | 202 | 391  | 592  |
| LinJ26_V3.2120 | <i>L. infantum</i> | 210 | 641  | 850  |
| LinJ26_V3.2120 | <i>L. infantum</i> | 47  | 907  | 953  |
| LinJ26_V3.2120 | <i>L. infantum</i> | 189 | 1000 | 1188 |
| LinJ26_V3.2120 | <i>L. infantum</i> | 137 | 1204 | 1340 |
| LinJ26_V3.2120 | <i>L. infantum</i> | 249 | 1376 | 1624 |
| LinJ26_V3.2120 | <i>L. infantum</i> | 60  | 1646 | 1705 |
| LinJ26_V3.2120 | <i>L. infantum</i> | 55  | 1728 | 1782 |
| LinJ26_V3.2120 | <i>L. infantum</i> | 347 | 1835 | 2181 |
| LinJ26_V3.2120 | <i>L. infantum</i> | 233 | 2278 | 2510 |
| LinJ26_V3.2130 | <i>L. infantum</i> | 55  | 1    | 55   |
| LinJ26_V3.2130 | <i>L. infantum</i> | 97  | 73   | 169  |
| LinJ26_V3.2130 | <i>L. infantum</i> | 193 | 198  | 390  |
| LinJ26_V3.2130 | <i>L. infantum</i> | 59  | 474  | 532  |
| LinJ26_V3.2130 | <i>L. infantum</i> | 136 | 569  | 704  |
| LinJ26_V3.2130 | <i>L. infantum</i> | 163 | 740  | 902  |
| LinJ26_V3.2130 | <i>L. infantum</i> | 130 | 921  | 1050 |
| LinJ26_V3.2130 | <i>L. infantum</i> | 239 | 1065 | 1303 |
| LinJ26_V3.2130 | <i>L. infantum</i> | 81  | 1349 | 1429 |
| LinJ26_V3.2140 | <i>L. infantum</i> | 44  | 1    | 44   |
| LinJ26_V3.2140 | <i>L. infantum</i> | 48  | 163  | 210  |
| LinJ26_V3.2160 | <i>L. infantum</i> | 55  | 45   | 99   |
| LinJ26_V3.2160 | <i>L. infantum</i> | 52  | 284  | 335  |
| LinJ26_V3.2160 | <i>L. infantum</i> | 49  | 426  | 474  |
| LinJ26_V3.2160 | <i>L. infantum</i> | 44  | 515  | 558  |
| LinJ26_V3.2180 | <i>L. infantum</i> | 102 | 1    | 102  |

|                |                    |      |      |      |
|----------------|--------------------|------|------|------|
| LinJ26_V3.2180 | <i>L. infantum</i> | 95   | 196  | 290  |
| LinJ26_V3.2180 | <i>L. infantum</i> | 74   | 307  | 380  |
| LinJ26_V3.2180 | <i>L. infantum</i> | 73   | 392  | 464  |
| LinJ26_V3.2180 | <i>L. infantum</i> | 1112 | 474  | 1585 |
| LinJ26_V3.2180 | <i>L. infantum</i> | 144  | 1867 | 2010 |
| LinJ26_V3.2190 | <i>L. infantum</i> | 363  | 68   | 430  |
| LinJ26_V3.2190 | <i>L. infantum</i> | 627  | 502  | 1128 |
| LinJ26_V3.2190 | <i>L. infantum</i> | 205  | 1179 | 1383 |
| LinJ26_V3.2190 | <i>L. infantum</i> | 155  | 1410 | 1564 |
| LinJ26_V3.2200 | <i>L. infantum</i> | 68   | 47   | 114  |
| LinJ26_V3.2200 | <i>L. infantum</i> | 58   | 301  | 358  |
| LinJ26_V3.2210 | <i>L. infantum</i> | 304  | 1    | 304  |
| LinJ26_V3.2220 | <i>L. infantum</i> | 63   | 1    | 63   |
| LinJ26_V3.2220 | <i>L. infantum</i> | 226  | 110  | 335  |
| LinJ26_V3.2220 | <i>L. infantum</i> | 59   | 485  | 543  |
| LinJ26_V3.2220 | <i>L. infantum</i> | 121  | 585  | 705  |
| LinJ26_V3.2240 | <i>L. infantum</i> | 50   | 1    | 50   |
| LinJ26_V3.2250 | <i>L. infantum</i> | 43   | 1    | 43   |
| LinJ26_V3.2260 | <i>L. infantum</i> | 167  | 1    | 167  |
| LinJ26_V3.2260 | <i>L. infantum</i> | 139  | 208  | 346  |
| LinJ26_V3.2260 | <i>L. infantum</i> | 100  | 370  | 469  |
| LinJ26_V3.2260 | <i>L. infantum</i> | 43   | 553  | 595  |
| LinJ26_V3.2260 | <i>L. infantum</i> | 78   | 643  | 720  |
| LinJ26_V3.2270 | <i>L. infantum</i> | 59   | 1    | 59   |
| LinJ26_V3.2270 | <i>L. infantum</i> | 94   | 512  | 605  |
| LinJ26_V3.2270 | <i>L. infantum</i> | 48   | 617  | 664  |
| LinJ26_V3.2280 | <i>L. infantum</i> | 84   | 184  | 267  |
| LinJ26_V3.2300 | <i>L. infantum</i> | 41   | 32   | 72   |
| LinJ26_V3.2300 | <i>L. infantum</i> | 43   | 93   | 135  |
| LinJ26_V3.2300 | <i>L. infantum</i> | 43   | 93   | 135  |
| LinJ26_V3.2310 | <i>L. infantum</i> | 94   | 41   | 134  |
| LinJ26_V3.2310 | <i>L. infantum</i> | 70   | 181  | 250  |
| LinJ26_V3.2310 | <i>L. infantum</i> | 154  | 252  | 405  |
| LinJ26_V3.2310 | <i>L. infantum</i> | 116  | 469  | 584  |
| LinJ26_V3.2310 | <i>L. infantum</i> | 121  | 661  | 781  |
| LinJ26_V3.2310 | <i>L. infantum</i> | 308  | 787  | 1094 |
| LinJ26_V3.2330 | <i>L. infantum</i> | 108  | 21   | 128  |
| LinJ26_V3.2330 | <i>L. infantum</i> | 54   | 133  | 186  |
| LinJ26_V3.2330 | <i>L. infantum</i> | 64   | 218  | 281  |
| LinJ26_V3.2340 | <i>L. infantum</i> | 227  | 219  | 445  |
| LinJ26_V3.2340 | <i>L. infantum</i> | 160  | 496  | 655  |
| LinJ26_V3.2350 | <i>L. infantum</i> | 43   | 1    | 43   |
| LinJ26_V3.2350 | <i>L. infantum</i> | 51   | 77   | 127  |
| LinJ26_V3.2350 | <i>L. infantum</i> | 51   | 77   | 127  |
| LinJ26_V3.2360 | <i>L. infantum</i> | 43   | 1    | 43   |
| LinJ26_V3.2360 | <i>L. infantum</i> | 51   | 77   | 127  |
| LinJ26_V3.2360 | <i>L. infantum</i> | 51   | 77   | 127  |



|                |                    |     |      |      |
|----------------|--------------------|-----|------|------|
| LinJ26_V3.2370 | <i>L. infantum</i> | 100 | 1    | 100  |
| LinJ26_V3.2370 | <i>L. infantum</i> | 52  | 128  | 179  |
| LinJ26_V3.2370 | <i>L. infantum</i> | 527 | 190  | 716  |
| LinJ26_V3.2370 | <i>L. infantum</i> | 125 | 737  | 861  |
| LinJ26_V3.2380 | <i>L. infantum</i> | 82  | 534  | 615  |
| LinJ26_V3.2390 | <i>L. infantum</i> | 77  | 90   | 166  |
| LinJ26_V3.2390 | <i>L. infantum</i> | 205 | 181  | 385  |
| LinJ26_V3.2390 | <i>L. infantum</i> | 68  | 418  | 485  |
| LinJ26_V3.2390 | <i>L. infantum</i> | 70  | 534  | 603  |
| LinJ26_V3.2390 | <i>L. infantum</i> | 165 | 609  | 773  |
| LinJ26_V3.2390 | <i>L. infantum</i> | 68  | 820  | 887  |
| LinJ26_V3.2390 | <i>L. infantum</i> | 82  | 952  | 1033 |
| LinJ26_V3.2390 | <i>L. infantum</i> | 47  | 1213 | 1259 |
| LinJ26_V3.2390 | <i>L. infantum</i> | 49  | 1384 | 1432 |
| LinJ26_V3.2390 | <i>L. infantum</i> | 47  | 1587 | 1633 |
| LinJ26_V3.2390 | <i>L. infantum</i> | 67  | 1792 | 1858 |
| LinJ26_V3.2390 | <i>L. infantum</i> | 107 | 2193 | 2299 |
| LinJ26_V3.2390 | <i>L. infantum</i> | 177 | 2455 | 2631 |
| LinJ26_V3.2390 | <i>L. infantum</i> | 41  | 3252 | 3292 |
| LinJ26_V3.2390 | <i>L. infantum</i> | 144 | 3446 | 3589 |
| LinJ26_V3.2400 | <i>L. infantum</i> | 57  | 17   | 73   |
| LinJ26_V3.2400 | <i>L. infantum</i> | 69  | 99   | 167  |
| LinJ26_V3.2400 | <i>L. infantum</i> | 60  | 210  | 269  |
| LinJ26_V3.2400 | <i>L. infantum</i> | 53  | 574  | 626  |
| LinJ26_V3.2400 | <i>L. infantum</i> | 68  | 1984 | 2051 |
| LinJ26_V3.2400 | <i>L. infantum</i> | 66  | 2473 | 2538 |
| LinJ26_V3.2400 | <i>L. infantum</i> | 75  | 2588 | 2662 |
| LinJ26_V3.2400 | <i>L. infantum</i> | 114 | 3043 | 3156 |
| LinJ26_V3.2400 | <i>L. infantum</i> | 72  | 3537 | 3608 |
| LinJ26_V3.2400 | <i>L. infantum</i> | 75  | 3796 | 3870 |
| LinJ26_V3.2400 | <i>L. infantum</i> | 69  | 4142 | 4210 |
| LinJ26_V3.2400 | <i>L. infantum</i> | 134 | 4437 | 4570 |
| LinJ26_V3.2400 | <i>L. infantum</i> | 41  | 4603 | 4643 |
| LinJ26_V3.2400 | <i>L. infantum</i> | 52  | 4805 | 4856 |
| LinJ26_V3.2400 | <i>L. infantum</i> | 164 | 4939 | 5102 |
| LinJ26_V3.2410 | <i>L. infantum</i> | 202 | 9    | 210  |
| LinJ26_V3.2410 | <i>L. infantum</i> | 98  | 379  | 476  |
| LinJ26_V3.2410 | <i>L. infantum</i> | 292 | 515  | 806  |
| LinJ26_V3.2430 | <i>L. infantum</i> | 60  | 15   | 74   |
| LinJ26_V3.2440 | <i>L. infantum</i> | 124 | 146  | 269  |
| LinJ26_V3.2460 | <i>L. infantum</i> | 56  | 1    | 56   |
| LinJ26_V3.2460 | <i>L. infantum</i> | 220 | 69   | 288  |
| LinJ26_V3.2460 | <i>L. infantum</i> | 77  | 548  | 624  |
| LinJ26_V3.2460 | <i>L. infantum</i> | 411 | 633  | 1043 |
| LinJ26_V3.2470 | <i>L. infantum</i> | 67  | 87   | 153  |
| LinJ26_V3.2470 | <i>L. infantum</i> | 56  | 166  | 221  |
| LinJ26_V3.2480 | <i>L. infantum</i> | 98  | 1    | 98   |

|                |                    |     |      |      |
|----------------|--------------------|-----|------|------|
| LinJ26_V3.2490 | <i>L. infantum</i> | 42  | 27   | 68   |
| LinJ26_V3.2510 | <i>L. infantum</i> | 193 | 1    | 193  |
| LinJ26_V3.2510 | <i>L. infantum</i> | 249 | 225  | 473  |
| LinJ26_V3.2510 | <i>L. infantum</i> | 302 | 475  | 776  |
| LinJ26_V3.2510 | <i>L. infantum</i> | 238 | 810  | 1047 |
| LinJ26_V3.2510 | <i>L. infantum</i> | 434 | 1049 | 1482 |
| LinJ26_V3.2510 | <i>L. infantum</i> | 58  | 1516 | 1573 |
| LinJ26_V3.2520 | <i>L. infantum</i> | 61  | 1    | 61   |
| LinJ26_V3.2520 | <i>L. infantum</i> | 47  | 112  | 158  |
| LinJ26_V3.2520 | <i>L. infantum</i> | 115 | 201  | 315  |
| LinJ26_V3.2520 | <i>L. infantum</i> | 51  | 395  | 445  |
| LinJ26_V3.2550 | <i>L. infantum</i> | 124 | 74   | 197  |
| LinJ26_V3.2550 | <i>L. infantum</i> | 191 | 298  | 488  |
| LinJ26_V3.2560 | <i>L. infantum</i> | 110 | 371  | 480  |
| LinJ26_V3.2600 | <i>L. infantum</i> | 42  | 314  | 355  |
| LinJ26_V3.2620 | <i>L. infantum</i> | 55  | 593  | 647  |
| LinJ26_V3.2630 | <i>L. infantum</i> | 95  | 1    | 95   |
| LinJ26_V3.2630 | <i>L. infantum</i> | 139 | 97   | 235  |
| LinJ26_V3.2630 | <i>L. infantum</i> | 53  | 280  | 332  |
| LinJ26_V3.2630 | <i>L. infantum</i> | 256 | 446  | 701  |
| LinJ26_V3.2670 | <i>L. infantum</i> | 115 | 118  | 232  |
| LinJ26_V3.2670 | <i>L. infantum</i> | 77  | 245  | 321  |
| LinJ26_V3.2680 | <i>L. infantum</i> | 70  | 1    | 70   |
| LinJ26_V3.2680 | <i>L. infantum</i> | 63  | 111  | 173  |
| LinJ26_V3.2680 | <i>L. infantum</i> | 114 | 233  | 346  |
| LinJ26_V3.2690 | <i>L. infantum</i> | 664 | 1    | 664  |
| LinJ27_V3.0010 | <i>L. infantum</i> | 113 | 118  | 230  |
| LinJ27_V3.0050 | <i>L. infantum</i> | 90  | 38   | 127  |
| LinJ27_V3.0050 | <i>L. infantum</i> | 59  | 417  | 475  |
| LinJ27_V3.0050 | <i>L. infantum</i> | 107 | 712  | 818  |
| LinJ27_V3.0100 | <i>L. infantum</i> | 337 | 324  | 660  |
| LinJ27_V3.0120 | <i>L. infantum</i> | 46  | 365  | 410  |
| LinJ27_V3.0140 | <i>L. infantum</i> | 93  | 61   | 153  |
| LinJ27_V3.0150 | <i>L. infantum</i> | 118 | 66   | 183  |
| LinJ27_V3.0170 | <i>L. infantum</i> | 46  | 1    | 46   |
| LinJ27_V3.0170 | <i>L. infantum</i> | 46  | 87   | 132  |
| LinJ27_V3.0170 | <i>L. infantum</i> | 46  | 87   | 132  |
| LinJ27_V3.0180 | <i>L. infantum</i> | 44  | 136  | 179  |
| LinJ27_V3.0200 | <i>L. infantum</i> | 90  | 253  | 342  |
| LinJ27_V3.0210 | <i>L. infantum</i> | 52  | 1    | 52   |
| LinJ27_V3.0220 | <i>L. infantum</i> | 111 | 174  | 284  |
| LinJ27_V3.0250 | <i>L. infantum</i> | 660 | 1    | 660  |
| LinJ27_V3.0260 | <i>L. infantum</i> | 60  | 91   | 150  |
| LinJ27_V3.0260 | <i>L. infantum</i> | 45  | 351  | 395  |
| LinJ27_V3.0260 | <i>L. infantum</i> | 45  | 351  | 395  |
| LinJ27_V3.0280 | <i>L. infantum</i> | 149 | 1    | 149  |
| LinJ27_V3.0280 | <i>L. infantum</i> | 85  | 204  | 288  |

|                |                    |      |      |      |
|----------------|--------------------|------|------|------|
| LinJ27_V3.0280 | <i>L. infantum</i> | 58   | 332  | 389  |
| LinJ27_V3.0280 | <i>L. infantum</i> | 337  | 433  | 769  |
| LinJ27_V3.0280 | <i>L. infantum</i> | 161  | 786  | 946  |
| LinJ27_V3.0280 | <i>L. infantum</i> | 87   | 968  | 1054 |
| LinJ27_V3.0300 | <i>L. infantum</i> | 44   | 1    | 44   |
| LinJ27_V3.0320 | <i>L. infantum</i> | 54   | 622  | 675  |
| LinJ27_V3.0330 | <i>L. infantum</i> | 64   | 431  | 494  |
| LinJ27_V3.0340 | <i>L. infantum</i> | 139  | 85   | 223  |
| LinJ27_V3.0350 | <i>L. infantum</i> | 52   | 1    | 52   |
| LinJ27_V3.0360 | <i>L. infantum</i> | 43   | 131  | 173  |
| LinJ27_V3.0360 | <i>L. infantum</i> | 58   | 319  | 376  |
| LinJ27_V3.0360 | <i>L. infantum</i> | 58   | 319  | 376  |
| LinJ27_V3.0390 | <i>L. infantum</i> | 588  | 1    | 588  |
| LinJ27_V3.0390 | <i>L. infantum</i> | 104  | 639  | 742  |
| LinJ27_V3.0390 | <i>L. infantum</i> | 121  | 851  | 971  |
| LinJ27_V3.0410 | <i>L. infantum</i> | 59   | 1    | 59   |
| LinJ27_V3.0420 | <i>L. infantum</i> | 69   | 1    | 69   |
| LinJ27_V3.0420 | <i>L. infantum</i> | 85   | 101  | 185  |
| LinJ27_V3.0420 | <i>L. infantum</i> | 110  | 206  | 315  |
| LinJ27_V3.0440 | <i>L. infantum</i> | 610  | 1    | 610  |
| LinJ27_V3.0450 | <i>L. infantum</i> | 51   | 443  | 493  |
| LinJ27_V3.0460 | <i>L. infantum</i> | 117  | 1    | 117  |
| LinJ27_V3.0470 | <i>L. infantum</i> | 52   | 1    | 52   |
| LinJ27_V3.0470 | <i>L. infantum</i> | 133  | 212  | 344  |
| LinJ27_V3.0470 | <i>L. infantum</i> | 237  | 384  | 620  |
| LinJ27_V3.0490 | <i>L. infantum</i> | 79   | 355  | 433  |
| LinJ27_V3.0490 | <i>L. infantum</i> | 110  | 490  | 599  |
| LinJ27_V3.0490 | <i>L. infantum</i> | 110  | 490  | 599  |
| LinJ27_V3.0500 | <i>L. infantum</i> | 51   | 586  | 636  |
| LinJ27_V3.0500 | <i>L. infantum</i> | 70   | 1196 | 1265 |
| LinJ27_V3.0500 | <i>L. infantum</i> | 189  | 1276 | 1464 |
| LinJ27_V3.0500 | <i>L. infantum</i> | 132  | 1484 | 1615 |
| LinJ27_V3.0500 | <i>L. infantum</i> | 110  | 1678 | 1787 |
| LinJ27_V3.0500 | <i>L. infantum</i> | 2988 | 1949 | 4936 |
| LinJ27_V3.0500 | <i>L. infantum</i> | 99   | 5129 | 5227 |
| LinJ27_V3.0500 | <i>L. infantum</i> | 128  | 5241 | 5368 |
| LinJ27_V3.0500 | <i>L. infantum</i> | 63   | 5920 | 5982 |
| LinJ27_V3.0510 | <i>L. infantum</i> | 75   | 1196 | 1270 |
| LinJ27_V3.0510 | <i>L. infantum</i> | 53   | 1284 | 1336 |
| LinJ27_V3.0510 | <i>L. infantum</i> | 129  | 1348 | 1476 |
| LinJ27_V3.0510 | <i>L. infantum</i> | 70   | 1488 | 1557 |
| LinJ27_V3.0510 | <i>L. infantum</i> | 43   | 1567 | 1609 |
| LinJ27_V3.0510 | <i>L. infantum</i> | 192  | 1627 | 1818 |
| LinJ27_V3.0510 | <i>L. infantum</i> | 78   | 1844 | 1921 |
| LinJ27_V3.0510 | <i>L. infantum</i> | 226  | 1925 | 2150 |
| LinJ27_V3.0510 | <i>L. infantum</i> | 485  | 2186 | 2670 |
| LinJ27_V3.0510 | <i>L. infantum</i> | 54   | 2709 | 2762 |

|                |                    |     |      |      |
|----------------|--------------------|-----|------|------|
| LinJ27_V3.0510 | <i>L. infantum</i> | 43  | 2788 | 2830 |
| LinJ27_V3.0510 | <i>L. infantum</i> | 588 | 2845 | 3432 |
| LinJ27_V3.0510 | <i>L. infantum</i> | 146 | 3506 | 3651 |
| LinJ27_V3.0510 | <i>L. infantum</i> | 127 | 3673 | 3799 |
| LinJ27_V3.0510 | <i>L. infantum</i> | 72  | 3827 | 3898 |
| LinJ27_V3.0510 | <i>L. infantum</i> | 46  | 3935 | 3980 |
| LinJ27_V3.0510 | <i>L. infantum</i> | 506 | 4000 | 4505 |
| LinJ27_V3.0510 | <i>L. infantum</i> | 161 | 4523 | 4683 |
| LinJ27_V3.0510 | <i>L. infantum</i> | 92  | 4688 | 4779 |
| LinJ27_V3.0510 | <i>L. infantum</i> | 262 | 4815 | 5076 |
| LinJ27_V3.0510 | <i>L. infantum</i> | 459 | 5081 | 5539 |
| LinJ27_V3.0510 | <i>L. infantum</i> | 74  | 6095 | 6168 |
| LinJ27_V3.0530 | <i>L. infantum</i> | 113 | 1    | 113  |
| LinJ27_V3.0540 | <i>L. infantum</i> | 66  | 1    | 66   |
| LinJ27_V3.0540 | <i>L. infantum</i> | 45  | 281  | 325  |
| LinJ27_V3.0540 | <i>L. infantum</i> | 76  | 363  | 438  |
| LinJ27_V3.0540 | <i>L. infantum</i> | 44  | 482  | 525  |
| LinJ27_V3.0550 | <i>L. infantum</i> | 179 | 1    | 179  |
| LinJ27_V3.0550 | <i>L. infantum</i> | 110 | 344  | 453  |
| LinJ27_V3.0570 | <i>L. infantum</i> | 320 | 67   | 386  |
| LinJ27_V3.0590 | <i>L. infantum</i> | 47  | 1    | 47   |
| LinJ27_V3.0630 | <i>L. infantum</i> | 84  | 368  | 451  |
| LinJ27_V3.0630 | <i>L. infantum</i> | 52  | 722  | 773  |
| LinJ27_V3.0630 | <i>L. infantum</i> | 198 | 789  | 986  |
| LinJ27_V3.0630 | <i>L. infantum</i> | 46  | 1008 | 1053 |
| LinJ27_V3.0630 | <i>L. infantum</i> | 67  | 1210 | 1276 |
| LinJ27_V3.0640 | <i>L. infantum</i> | 60  | 1    | 60   |
| LinJ27_V3.0640 | <i>L. infantum</i> | 45  | 155  | 199  |
| LinJ27_V3.0640 | <i>L. infantum</i> | 45  | 155  | 199  |
| LinJ27_V3.0650 | <i>L. infantum</i> | 151 | 50   | 200  |
| LinJ27_V3.0650 | <i>L. infantum</i> | 79  | 204  | 282  |
| LinJ27_V3.0650 | <i>L. infantum</i> | 50  | 287  | 336  |
| LinJ27_V3.0650 | <i>L. infantum</i> | 72  | 813  | 884  |
| LinJ27_V3.0660 | <i>L. infantum</i> | 110 | 60   | 169  |
| LinJ27_V3.0680 | <i>L. infantum</i> | 64  | 191  | 254  |
| LinJ27_V3.0680 | <i>L. infantum</i> | 84  | 346  | 429  |
| LinJ27_V3.0680 | <i>L. infantum</i> | 52  | 966  | 1017 |
| LinJ27_V3.0680 | <i>L. infantum</i> | 41  | 1677 | 1717 |
| LinJ27_V3.0680 | <i>L. infantum</i> | 73  | 1828 | 1900 |
| LinJ27_V3.0680 | <i>L. infantum</i> | 44  | 2404 | 2447 |
| LinJ27_V3.0680 | <i>L. infantum</i> | 46  | 2777 | 2822 |
| LinJ27_V3.0680 | <i>L. infantum</i> | 115 | 2847 | 2961 |
| LinJ27_V3.0680 | <i>L. infantum</i> | 167 | 3125 | 3291 |
| LinJ27_V3.0690 | <i>L. infantum</i> | 42  | 339  | 380  |
| LinJ27_V3.0700 | <i>L. infantum</i> | 79  | 57   | 135  |
| LinJ27_V3.0700 | <i>L. infantum</i> | 40  | 362  | 401  |
| LinJ27_V3.0700 | <i>L. infantum</i> | 84  | 488  | 571  |

|                |                    |     |      |      |
|----------------|--------------------|-----|------|------|
| LinJ27_V3.0740 | <i>L. infantum</i> | 135 | 488  | 622  |
| LinJ27_V3.0770 | <i>L. infantum</i> | 40  | 337  | 376  |
| LinJ27_V3.0770 | <i>L. infantum</i> | 48  | 1119 | 1166 |
| LinJ27_V3.0770 | <i>L. infantum</i> | 48  | 1119 | 1166 |
| LinJ27_V3.0810 | <i>L. infantum</i> | 59  | 1    | 59   |
| LinJ27_V3.0810 | <i>L. infantum</i> | 89  | 220  | 308  |
| LinJ27_V3.0810 | <i>L. infantum</i> | 303 | 346  | 648  |
| LinJ27_V3.0820 | <i>L. infantum</i> | 79  | 801  | 879  |
| LinJ27_V3.0820 | <i>L. infantum</i> | 51  | 1383 | 1433 |
| LinJ27_V3.0820 | <i>L. infantum</i> | 51  | 1383 | 1433 |
| LinJ27_V3.0830 | <i>L. infantum</i> | 143 | 1    | 143  |
| LinJ27_V3.0830 | <i>L. infantum</i> | 47  | 1797 | 1843 |
| LinJ27_V3.0830 | <i>L. infantum</i> | 47  | 1797 | 1843 |
| LinJ27_V3.0850 | <i>L. infantum</i> | 50  | 82   | 131  |
| LinJ27_V3.0850 | <i>L. infantum</i> | 55  | 184  | 238  |
| LinJ27_V3.0850 | <i>L. infantum</i> | 55  | 184  | 238  |
| LinJ27_V3.0870 | <i>L. infantum</i> | 68  | 1    | 68   |
| LinJ27_V3.0870 | <i>L. infantum</i> | 103 | 832  | 934  |
| LinJ27_V3.0890 | <i>L. infantum</i> | 157 | 1    | 157  |
| LinJ27_V3.0890 | <i>L. infantum</i> | 102 | 458  | 559  |
| LinJ27_V3.0890 | <i>L. infantum</i> | 58  | 758  | 815  |
| LinJ27_V3.0900 | <i>L. infantum</i> | 124 | 1    | 124  |
| LinJ27_V3.0900 | <i>L. infantum</i> | 97  | 286  | 382  |
| LinJ27_V3.0910 | <i>L. infantum</i> | 46  | 1    | 46   |
| LinJ27_V3.0920 | <i>L. infantum</i> | 88  | 1    | 88   |
| LinJ27_V3.0920 | <i>L. infantum</i> | 73  | 594  | 666  |
| LinJ27_V3.0940 | <i>L. infantum</i> | 70  | 208  | 277  |
| LinJ27_V3.0940 | <i>L. infantum</i> | 97  | 552  | 648  |
| LinJ27_V3.0940 | <i>L. infantum</i> | 97  | 552  | 648  |
| LinJ27_V3.0970 | <i>L. infantum</i> | 63  | 148  | 210  |
| LinJ27_V3.0970 | <i>L. infantum</i> | 381 | 266  | 646  |
| LinJ27_V3.0980 | <i>L. infantum</i> | 101 | 1    | 101  |
| LinJ27_V3.0980 | <i>L. infantum</i> | 57  | 178  | 234  |
| LinJ27_V3.0990 | <i>L. infantum</i> | 85  | 137  | 221  |
| LinJ27_V3.1010 | <i>L. infantum</i> | 163 | 4    | 166  |
| LinJ27_V3.1010 | <i>L. infantum</i> | 108 | 704  | 811  |
| LinJ27_V3.1020 | <i>L. infantum</i> | 60  | 15   | 74   |
| LinJ27_V3.1020 | <i>L. infantum</i> | 41  | 98   | 138  |
| LinJ27_V3.1020 | <i>L. infantum</i> | 425 | 159  | 583  |
| LinJ27_V3.1030 | <i>L. infantum</i> | 53  | 61   | 113  |
| LinJ27_V3.1040 | <i>L. infantum</i> | 58  | 1    | 58   |
| LinJ27_V3.1040 | <i>L. infantum</i> | 102 | 129  | 230  |
| LinJ27_V3.1040 | <i>L. infantum</i> | 42  | 751  | 792  |
| LinJ27_V3.1050 | <i>L. infantum</i> | 48  | 39   | 86   |
| LinJ27_V3.1050 | <i>L. infantum</i> | 120 | 122  | 241  |
| LinJ27_V3.1060 | <i>L. infantum</i> | 50  | 148  | 197  |
| LinJ27_V3.1070 | <i>L. infantum</i> | 111 | 1    | 111  |

|                |                    |     |      |      |
|----------------|--------------------|-----|------|------|
| LinJ27_V3.1090 | <i>L. infantum</i> | 256 | 1    | 256  |
| LinJ27_V3.1090 | <i>L. infantum</i> | 58  | 562  | 619  |
| LinJ27_V3.1100 | <i>L. infantum</i> | 126 | 1    | 126  |
| LinJ27_V3.1100 | <i>L. infantum</i> | 60  | 190  | 249  |
| LinJ27_V3.1100 | <i>L. infantum</i> | 55  | 357  | 411  |
| LinJ27_V3.1110 | <i>L. infantum</i> | 51  | 1    | 51   |
| LinJ27_V3.1110 | <i>L. infantum</i> | 87  | 203  | 289  |
| LinJ27_V3.1110 | <i>L. infantum</i> | 180 | 339  | 518  |
| LinJ27_V3.1120 | <i>L. infantum</i> | 102 | 1    | 102  |
| LinJ27_V3.1170 | <i>L. infantum</i> | 144 | 91   | 234  |
| LinJ27_V3.1180 | <i>L. infantum</i> | 154 | 1    | 154  |
| LinJ27_V3.1180 | <i>L. infantum</i> | 223 | 220  | 442  |
| LinJ27_V3.1180 | <i>L. infantum</i> | 223 | 220  | 442  |
| LinJ27_V3.1200 | <i>L. infantum</i> | 64  | 1    | 64   |
| LinJ27_V3.1210 | <i>L. infantum</i> | 76  | 88   | 163  |
| LinJ27_V3.1220 | <i>L. infantum</i> | 163 | 22   | 184  |
| LinJ27_V3.1220 | <i>L. infantum</i> | 52  | 478  | 529  |
| LinJ27_V3.1230 | <i>L. infantum</i> | 48  | 489  | 536  |
| LinJ27_V3.1240 | <i>L. infantum</i> | 40  | 119  | 158  |
| LinJ27_V3.1240 | <i>L. infantum</i> | 79  | 194  | 272  |
| LinJ27_V3.1240 | <i>L. infantum</i> | 74  | 527  | 600  |
| LinJ27_V3.1260 | <i>L. infantum</i> | 51  | 57   | 107  |
| LinJ27_V3.1260 | <i>L. infantum</i> | 114 | 224  | 337  |
| LinJ27_V3.1270 | <i>L. infantum</i> | 215 | 101  | 315  |
| LinJ27_V3.1280 | <i>L. infantum</i> | 71  | 43   | 113  |
| LinJ27_V3.1280 | <i>L. infantum</i> | 49  | 212  | 260  |
| LinJ27_V3.1280 | <i>L. infantum</i> | 424 | 263  | 686  |
| LinJ27_V3.1290 | <i>L. infantum</i> | 540 | 1    | 540  |
| LinJ27_V3.1290 | <i>L. infantum</i> | 573 | 796  | 1368 |
| LinJ27_V3.1290 | <i>L. infantum</i> | 119 | 1385 | 1503 |
| LinJ27_V3.1300 | <i>L. infantum</i> | 57  | 267  | 323  |
| LinJ27_V3.1320 | <i>L. infantum</i> | 71  | 103  | 173  |
| LinJ27_V3.1330 | <i>L. infantum</i> | 215 | 49   | 263  |
| LinJ27_V3.1340 | <i>L. infantum</i> | 59  | 252  | 310  |
| LinJ27_V3.1340 | <i>L. infantum</i> | 63  | 371  | 433  |
| LinJ27_V3.1340 | <i>L. infantum</i> | 45  | 461  | 505  |
| LinJ27_V3.1340 | <i>L. infantum</i> | 77  | 580  | 656  |
| LinJ27_V3.1340 | <i>L. infantum</i> | 87  | 809  | 895  |
| LinJ27_V3.1350 | <i>L. infantum</i> | 215 | 1    | 215  |
| LinJ27_V3.1360 | <i>L. infantum</i> | 45  | 445  | 489  |
| LinJ27_V3.1360 | <i>L. infantum</i> | 205 | 648  | 852  |
| LinJ27_V3.1370 | <i>L. infantum</i> | 48  | 287  | 334  |
| LinJ27_V3.1380 | <i>L. infantum</i> | 82  | 1    | 82   |
| LinJ27_V3.1380 | <i>L. infantum</i> | 71  | 168  | 238  |
| LinJ27_V3.1380 | <i>L. infantum</i> | 61  | 266  | 326  |
| LinJ27_V3.1380 | <i>L. infantum</i> | 141 | 713  | 853  |
| LinJ27_V3.1380 | <i>L. infantum</i> | 184 | 971  | 1154 |

|                |                    |     |      |      |
|----------------|--------------------|-----|------|------|
| LinJ27_V3.1380 | <i>L. infantum</i> | 48  | 1177 | 1224 |
| LinJ27_V3.1380 | <i>L. infantum</i> | 42  | 1294 | 1335 |
| LinJ27_V3.1390 | <i>L. infantum</i> | 274 | 149  | 422  |
| LinJ27_V3.1390 | <i>L. infantum</i> | 67  | 431  | 497  |
| LinJ27_V3.1390 | <i>L. infantum</i> | 127 | 571  | 697  |
| LinJ27_V3.1420 | <i>L. infantum</i> | 48  | 177  | 224  |
| LinJ27_V3.1420 | <i>L. infantum</i> | 97  | 307  | 403  |
| LinJ27_V3.1440 | <i>L. infantum</i> | 102 | 1    | 102  |
| LinJ27_V3.1460 | <i>L. infantum</i> | 41  | 515  | 555  |
| LinJ27_V3.1460 | <i>L. infantum</i> | 52  | 776  | 827  |
| LinJ27_V3.1480 | <i>L. infantum</i> | 40  | 292  | 331  |
| LinJ27_V3.1490 | <i>L. infantum</i> | 58  | 89   | 146  |
| LinJ27_V3.1490 | <i>L. infantum</i> | 111 | 211  | 321  |
| LinJ27_V3.1490 | <i>L. infantum</i> | 111 | 211  | 321  |
| LinJ27_V3.1530 | <i>L. infantum</i> | 59  | 1    | 59   |
| LinJ27_V3.1530 | <i>L. infantum</i> | 82  | 119  | 200  |
| LinJ27_V3.1530 | <i>L. infantum</i> | 77  | 357  | 433  |
| LinJ27_V3.1530 | <i>L. infantum</i> | 78  | 764  | 841  |
| LinJ27_V3.1540 | <i>L. infantum</i> | 47  | 435  | 481  |
| LinJ27_V3.1540 | <i>L. infantum</i> | 111 | 586  | 696  |
| LinJ27_V3.1540 | <i>L. infantum</i> | 180 | 736  | 915  |
| LinJ27_V3.1550 | <i>L. infantum</i> | 120 | 56   | 175  |
| LinJ27_V3.1550 | <i>L. infantum</i> | 302 | 212  | 513  |
| LinJ27_V3.1550 | <i>L. infantum</i> | 64  | 529  | 592  |
| LinJ27_V3.1550 | <i>L. infantum</i> | 106 | 605  | 710  |
| LinJ27_V3.1550 | <i>L. infantum</i> | 188 | 717  | 904  |
| LinJ27_V3.1550 | <i>L. infantum</i> | 210 | 937  | 1146 |
| LinJ27_V3.1550 | <i>L. infantum</i> | 45  | 1174 | 1218 |
| LinJ27_V3.1550 | <i>L. infantum</i> | 48  | 1243 | 1290 |
| LinJ27_V3.1570 | <i>L. infantum</i> | 50  | 274  | 323  |
| LinJ27_V3.1580 | <i>L. infantum</i> | 78  | 1    | 78   |
| LinJ27_V3.1580 | <i>L. infantum</i> | 45  | 306  | 350  |
| LinJ27_V3.1600 | <i>L. infantum</i> | 81  | 1    | 81   |
| LinJ27_V3.1630 | <i>L. infantum</i> | 54  | 125  | 178  |
| LinJ27_V3.1630 | <i>L. infantum</i> | 125 | 215  | 339  |
| LinJ27_V3.1650 | <i>L. infantum</i> | 61  | 66   | 126  |
| LinJ27_V3.1650 | <i>L. infantum</i> | 82  | 185  | 266  |
| LinJ27_V3.1650 | <i>L. infantum</i> | 40  | 1285 | 1324 |
| LinJ27_V3.1650 | <i>L. infantum</i> | 122 | 3034 | 3155 |
| LinJ27_V3.1650 | <i>L. infantum</i> | 78  | 3261 | 3338 |
| LinJ27_V3.1650 | <i>L. infantum</i> | 63  | 3552 | 3614 |
| LinJ27_V3.1650 | <i>L. infantum</i> | 44  | 4146 | 4189 |
| LinJ27_V3.1660 | <i>L. infantum</i> | 59  | 461  | 519  |
| LinJ27_V3.1670 | <i>L. infantum</i> | 68  | 269  | 336  |
| LinJ27_V3.1670 | <i>L. infantum</i> | 54  | 566  | 619  |
| LinJ27_V3.1670 | <i>L. infantum</i> | 54  | 566  | 619  |
| LinJ27_V3.1680 | <i>L. infantum</i> | 110 | 1    | 110  |

|                |                    |      |      |      |
|----------------|--------------------|------|------|------|
| LinJ27_V3.1680 | <i>L. infantum</i> | 45   | 164  | 208  |
| LinJ27_V3.1680 | <i>L. infantum</i> | 45   | 423  | 467  |
| LinJ27_V3.1680 | <i>L. infantum</i> | 50   | 519  | 568  |
| LinJ27_V3.1690 | <i>L. infantum</i> | 556  | 93   | 648  |
| LinJ27_V3.1690 | <i>L. infantum</i> | 131  | 711  | 841  |
| LinJ27_V3.1700 | <i>L. infantum</i> | 1408 | 335  | 1742 |
| LinJ27_V3.1720 | <i>L. infantum</i> | 157  | 1    | 157  |
| LinJ27_V3.1720 | <i>L. infantum</i> | 46   | 185  | 230  |
| LinJ27_V3.1720 | <i>L. infantum</i> | 1250 | 244  | 1493 |
| LinJ27_V3.1720 | <i>L. infantum</i> | 64   | 1495 | 1558 |
| LinJ27_V3.1720 | <i>L. infantum</i> | 60   | 1616 | 1675 |
| LinJ27_V3.1720 | <i>L. infantum</i> | 411  | 1702 | 2112 |
| LinJ27_V3.1720 | <i>L. infantum</i> | 156  | 2137 | 2292 |
| LinJ27_V3.1740 | <i>L. infantum</i> | 42   | 1    | 42   |
| LinJ27_V3.1740 | <i>L. infantum</i> | 132  | 76   | 207  |
| LinJ27_V3.1740 | <i>L. infantum</i> | 162  | 235  | 396  |
| LinJ27_V3.1740 | <i>L. infantum</i> | 84   | 463  | 546  |
| LinJ27_V3.1740 | <i>L. infantum</i> | 345  | 623  | 967  |
| LinJ27_V3.1740 | <i>L. infantum</i> | 133  | 1135 | 1267 |
| LinJ27_V3.1740 | <i>L. infantum</i> | 175  | 1394 | 1568 |
| LinJ27_V3.1750 | <i>L. infantum</i> | 125  | 265  | 389  |
| LinJ27_V3.1750 | <i>L. infantum</i> | 51   | 445  | 495  |
| LinJ27_V3.1750 | <i>L. infantum</i> | 157  | 561  | 717  |
| LinJ27_V3.1750 | <i>L. infantum</i> | 63   | 731  | 793  |
| LinJ27_V3.1760 | <i>L. infantum</i> | 225  | 1    | 225  |
| LinJ27_V3.1760 | <i>L. infantum</i> | 457  | 297  | 753  |
| LinJ27_V3.1760 | <i>L. infantum</i> | 97   | 757  | 853  |
| LinJ27_V3.1780 | <i>L. infantum</i> | 41   | 44   | 84   |
| LinJ27_V3.1780 | <i>L. infantum</i> | 44   | 194  | 237  |
| LinJ27_V3.1780 | <i>L. infantum</i> | 86   | 447  | 532  |
| LinJ27_V3.1790 | <i>L. infantum</i> | 354  | 505  | 858  |
| LinJ27_V3.1800 | <i>L. infantum</i> | 99   | 87   | 185  |
| LinJ27_V3.1800 | <i>L. infantum</i> | 125  | 245  | 369  |
| LinJ27_V3.1800 | <i>L. infantum</i> | 137  | 384  | 520  |
| LinJ27_V3.1800 | <i>L. infantum</i> | 42   | 664  | 705  |
| LinJ27_V3.1800 | <i>L. infantum</i> | 72   | 871  | 942  |
| LinJ27_V3.1810 | <i>L. infantum</i> | 49   | 1    | 49   |
| LinJ27_V3.1820 | <i>L. infantum</i> | 57   | 61   | 117  |
| LinJ27_V3.1830 | <i>L. infantum</i> | 46   | 1    | 46   |
| LinJ27_V3.1830 | <i>L. infantum</i> | 41   | 176  | 216  |
| LinJ27_V3.1830 | <i>L. infantum</i> | 43   | 423  | 465  |
| LinJ27_V3.1830 | <i>L. infantum</i> | 50   | 598  | 647  |
| LinJ27_V3.1840 | <i>L. infantum</i> | 59   | 296  | 354  |
| LinJ27_V3.1850 | <i>L. infantum</i> | 209  | 23   | 231  |
| LinJ27_V3.1860 | <i>L. infantum</i> | 91   | 1    | 91   |
| LinJ27_V3.1860 | <i>L. infantum</i> | 125  | 115  | 239  |
| LinJ27_V3.1860 | <i>L. infantum</i> | 118  | 365  | 482  |



|                |                    |     |      |      |
|----------------|--------------------|-----|------|------|
| LinJ27_V3.1860 | <i>L. infantum</i> | 212 | 744  | 955  |
| LinJ27_V3.1870 | <i>L. infantum</i> | 43  | 69   | 111  |
| LinJ27_V3.1870 | <i>L. infantum</i> | 49  | 209  | 257  |
| LinJ27_V3.1870 | <i>L. infantum</i> | 87  | 337  | 423  |
| LinJ27_V3.1870 | <i>L. infantum</i> | 221 | 703  | 923  |
| LinJ27_V3.1870 | <i>L. infantum</i> | 106 | 951  | 1056 |
| LinJ27_V3.1870 | <i>L. infantum</i> | 101 | 1101 | 1201 |
| LinJ27_V3.1870 | <i>L. infantum</i> | 71  | 1326 | 1396 |
| LinJ27_V3.1870 | <i>L. infantum</i> | 158 | 1428 | 1585 |
| LinJ27_V3.1880 | <i>L. infantum</i> | 205 | 1    | 205  |
| LinJ27_V3.1880 | <i>L. infantum</i> | 170 | 261  | 430  |
| LinJ27_V3.1900 | <i>L. infantum</i> | 90  | 322  | 411  |
| LinJ27_V3.1900 | <i>L. infantum</i> | 55  | 413  | 467  |
| LinJ27_V3.1900 | <i>L. infantum</i> | 76  | 474  | 549  |
| LinJ27_V3.1900 | <i>L. infantum</i> | 224 | 551  | 774  |
| LinJ27_V3.1900 | <i>L. infantum</i> | 99  | 827  | 925  |
| LinJ27_V3.1910 | <i>L. infantum</i> | 93  | 58   | 150  |
| LinJ27_V3.1910 | <i>L. infantum</i> | 80  | 164  | 243  |
| LinJ27_V3.1910 | <i>L. infantum</i> | 101 | 259  | 359  |
| LinJ27_V3.1910 | <i>L. infantum</i> | 96  | 423  | 518  |
| LinJ27_V3.1910 | <i>L. infantum</i> | 129 | 589  | 717  |
| LinJ27_V3.1910 | <i>L. infantum</i> | 112 | 885  | 996  |
| LinJ27_V3.1930 | <i>L. infantum</i> | 98  | 1    | 98   |
| LinJ27_V3.1930 | <i>L. infantum</i> | 115 | 125  | 239  |
| LinJ27_V3.1960 | <i>L. infantum</i> | 49  | 180  | 228  |
| LinJ27_V3.1970 | <i>L. infantum</i> | 72  | 1    | 72   |
| LinJ27_V3.1980 | <i>L. infantum</i> | 48  | 75   | 122  |
| LinJ27_V3.1980 | <i>L. infantum</i> | 83  | 190  | 272  |
| LinJ27_V3.1980 | <i>L. infantum</i> | 101 | 282  | 382  |
| LinJ27_V3.1990 | <i>L. infantum</i> | 140 | 1    | 140  |
| LinJ27_V3.1990 | <i>L. infantum</i> | 131 | 409  | 539  |
| LinJ27_V3.1990 | <i>L. infantum</i> | 165 | 559  | 723  |
| LinJ27_V3.1990 | <i>L. infantum</i> | 50  | 803  | 852  |
| LinJ27_V3.2020 | <i>L. infantum</i> | 59  | 81   | 139  |
| LinJ27_V3.2020 | <i>L. infantum</i> | 49  | 198  | 246  |
| LinJ27_V3.2020 | <i>L. infantum</i> | 139 | 311  | 449  |
| LinJ27_V3.2030 | <i>L. infantum</i> | 126 | 1    | 126  |
| LinJ27_V3.2030 | <i>L. infantum</i> | 142 | 135  | 276  |
| LinJ27_V3.2030 | <i>L. infantum</i> | 43  | 323  | 365  |
| LinJ27_V3.2030 | <i>L. infantum</i> | 96  | 677  | 772  |
| LinJ27_V3.2030 | <i>L. infantum</i> | 144 | 905  | 1048 |
| LinJ27_V3.2040 | <i>L. infantum</i> | 111 | 180  | 290  |
| LinJ27_V3.2050 | <i>L. infantum</i> | 223 | 1    | 223  |
| LinJ27_V3.2050 | <i>L. infantum</i> | 126 | 268  | 393  |
| LinJ27_V3.2050 | <i>L. infantum</i> | 142 | 416  | 557  |
| LinJ27_V3.2050 | <i>L. infantum</i> | 65  | 624  | 688  |
| LinJ27_V3.2050 | <i>L. infantum</i> | 120 | 744  | 863  |

|                |                    |     |      |      |
|----------------|--------------------|-----|------|------|
| LinJ27_V3.2050 | <i>L. infantum</i> | 41  | 956  | 996  |
| LinJ27_V3.2050 | <i>L. infantum</i> | 52  | 1035 | 1086 |
| LinJ27_V3.2050 | <i>L. infantum</i> | 217 | 1347 | 1563 |
| LinJ27_V3.2050 | <i>L. infantum</i> | 155 | 1667 | 1821 |
| LinJ27_V3.2060 | <i>L. infantum</i> | 366 | 89   | 454  |
| LinJ27_V3.2060 | <i>L. infantum</i> | 59  | 507  | 565  |
| LinJ27_V3.2060 | <i>L. infantum</i> | 58  | 598  | 655  |
| LinJ27_V3.2060 | <i>L. infantum</i> | 52  | 722  | 773  |
| LinJ27_V3.2060 | <i>L. infantum</i> | 85  | 881  | 965  |
| LinJ27_V3.2060 | <i>L. infantum</i> | 56  | 984  | 1039 |
| LinJ27_V3.2090 | <i>L. infantum</i> | 41  | 154  | 194  |
| LinJ27_V3.2090 | <i>L. infantum</i> | 110 | 389  | 498  |
| LinJ27_V3.2090 | <i>L. infantum</i> | 410 | 948  | 1357 |
| LinJ27_V3.2090 | <i>L. infantum</i> | 210 | 1382 | 1591 |
| LinJ27_V3.2120 | <i>L. infantum</i> | 122 | 1    | 122  |
| LinJ27_V3.2130 | <i>L. infantum</i> | 64  | 36   | 99   |
| LinJ27_V3.2140 | <i>L. infantum</i> | 63  | 200  | 262  |
| LinJ27_V3.2150 | <i>L. infantum</i> | 87  | 478  | 564  |
| LinJ27_V3.2150 | <i>L. infantum</i> | 57  | 622  | 678  |
| LinJ27_V3.2150 | <i>L. infantum</i> | 88  | 744  | 831  |
| LinJ27_V3.2150 | <i>L. infantum</i> | 46  | 877  | 922  |
| LinJ27_V3.2150 | <i>L. infantum</i> | 43  | 1245 | 1287 |
| LinJ27_V3.2150 | <i>L. infantum</i> | 44  | 1369 | 1412 |
| LinJ27_V3.2150 | <i>L. infantum</i> | 53  | 1414 | 1466 |
| LinJ27_V3.2150 | <i>L. infantum</i> | 79  | 1663 | 1741 |
| LinJ27_V3.2150 | <i>L. infantum</i> | 96  | 1801 | 1896 |
| LinJ27_V3.2150 | <i>L. infantum</i> | 44  | 1919 | 1962 |
| LinJ27_V3.2170 | <i>L. infantum</i> | 52  | 195  | 246  |
| LinJ27_V3.2180 | <i>L. infantum</i> | 69  | 210  | 278  |
| LinJ27_V3.2180 | <i>L. infantum</i> | 57  | 311  | 367  |
| LinJ27_V3.2180 | <i>L. infantum</i> | 56  | 450  | 505  |
| LinJ27_V3.2180 | <i>L. infantum</i> | 52  | 683  | 734  |
| LinJ27_V3.2180 | <i>L. infantum</i> | 47  | 960  | 1006 |
| LinJ27_V3.2180 | <i>L. infantum</i> | 98  | 1030 | 1127 |
| LinJ27_V3.2190 | <i>L. infantum</i> | 98  | 1    | 98   |
| LinJ27_V3.2190 | <i>L. infantum</i> | 378 | 125  | 502  |
| LinJ27_V3.2190 | <i>L. infantum</i> | 62  | 598  | 659  |
| LinJ27_V3.2210 | <i>L. infantum</i> | 58  | 662  | 719  |
| LinJ27_V3.2220 | <i>L. infantum</i> | 171 | 1    | 171  |
| LinJ27_V3.2220 | <i>L. infantum</i> | 51  | 650  | 700  |
| LinJ27_V3.2230 | <i>L. infantum</i> | 42  | 36   | 77   |
| LinJ27_V3.2240 | <i>L. infantum</i> | 69  | 53   | 121  |
| LinJ27_V3.2270 | <i>L. infantum</i> | 94  | 67   | 160  |
| LinJ27_V3.2280 | <i>L. infantum</i> | 43  | 115  | 157  |
| LinJ27_V3.2300 | <i>L. infantum</i> | 45  | 99   | 143  |
| LinJ27_V3.2310 | <i>L. infantum</i> | 63  | 322  | 384  |
| LinJ27_V3.2340 | <i>L. infantum</i> | 99  | 1    | 99   |

|                |                    |     |      |      |
|----------------|--------------------|-----|------|------|
| LinJ27_V3.2340 | <i>L. infantum</i> | 208 | 184  | 391  |
| LinJ27_V3.2350 | <i>L. infantum</i> | 75  | 32   | 106  |
| LinJ27_V3.2350 | <i>L. infantum</i> | 48  | 349  | 396  |
| LinJ27_V3.2350 | <i>L. infantum</i> | 48  | 349  | 396  |
| LinJ27_V3.2370 | <i>L. infantum</i> | 48  | 85   | 132  |
| LinJ27_V3.2370 | <i>L. infantum</i> | 65  | 145  | 209  |
| LinJ27_V3.2370 | <i>L. infantum</i> | 65  | 145  | 209  |
| LinJ27_V3.2380 | <i>L. infantum</i> | 80  | 1    | 80   |
| LinJ27_V3.2380 | <i>L. infantum</i> | 82  | 82   | 163  |
| LinJ27_V3.2380 | <i>L. infantum</i> | 358 | 213  | 570  |
| LinJ27_V3.2400 | <i>L. infantum</i> | 77  | 182  | 258  |
| LinJ27_V3.2400 | <i>L. infantum</i> | 150 | 298  | 447  |
| LinJ27_V3.2400 | <i>L. infantum</i> | 150 | 298  | 447  |
| LinJ27_V3.2410 | <i>L. infantum</i> | 69  | 125  | 193  |
| LinJ27_V3.2420 | <i>L. infantum</i> | 53  | 253  | 305  |
| LinJ27_V3.2420 | <i>L. infantum</i> | 79  | 485  | 563  |
| LinJ27_V3.2430 | <i>L. infantum</i> | 104 | 127  | 230  |
| LinJ27_V3.2440 | <i>L. infantum</i> | 53  | 1    | 53   |
| LinJ27_V3.2440 | <i>L. infantum</i> | 68  | 379  | 446  |
| LinJ27_V3.2450 | <i>L. infantum</i> | 132 | 1    | 132  |
| LinJ27_V3.2460 | <i>L. infantum</i> | 42  | 1    | 42   |
| LinJ27_V3.2460 | <i>L. infantum</i> | 83  | 65   | 147  |
| LinJ27_V3.2460 | <i>L. infantum</i> | 51  | 601  | 651  |
| LinJ27_V3.2460 | <i>L. infantum</i> | 122 | 2872 | 2993 |
| LinJ27_V3.2460 | <i>L. infantum</i> | 48  | 3149 | 3196 |
| LinJ27_V3.2460 | <i>L. infantum</i> | 74  | 3417 | 3490 |
| LinJ27_V3.2460 | <i>L. infantum</i> | 40  | 4017 | 4056 |
| LinJ27_V3.2480 | <i>L. infantum</i> | 57  | 267  | 323  |
| LinJ27_V3.2490 | <i>L. infantum</i> | 119 | 51   | 169  |
| LinJ27_V3.2490 | <i>L. infantum</i> | 145 | 180  | 324  |
| LinJ27_V3.2490 | <i>L. infantum</i> | 129 | 382  | 510  |
| LinJ27_V3.2490 | <i>L. infantum</i> | 142 | 521  | 662  |
| LinJ28_V3.0010 | <i>L. infantum</i> | 69  | 482  | 550  |
| LinJ28_V3.0040 | <i>L. infantum</i> | 163 | 20   | 182  |
| LinJ28_V3.0040 | <i>L. infantum</i> | 47  | 233  | 279  |
| LinJ28_V3.0040 | <i>L. infantum</i> | 61  | 443  | 503  |
| LinJ28_V3.0050 | <i>L. infantum</i> | 303 | 68   | 370  |
| LinJ28_V3.0060 | <i>L. infantum</i> | 66  | 1    | 66   |
| LinJ28_V3.0080 | <i>L. infantum</i> | 78  | 45   | 122  |
| LinJ28_V3.0150 | <i>L. infantum</i> | 50  | 479  | 528  |
| LinJ28_V3.0160 | <i>L. infantum</i> | 74  | 1    | 74   |
| LinJ28_V3.0170 | <i>L. infantum</i> | 97  | 1    | 97   |
| LinJ28_V3.0190 | <i>L. infantum</i> | 49  | 1    | 49   |
| LinJ28_V3.0190 | <i>L. infantum</i> | 60  | 165  | 224  |
| LinJ28_V3.0190 | <i>L. infantum</i> | 183 | 335  | 517  |
| LinJ28_V3.0210 | <i>L. infantum</i> | 45  | 1    | 45   |
| LinJ28_V3.0220 | <i>L. infantum</i> | 72  | 1    | 72   |

|                |                    |     |      |      |
|----------------|--------------------|-----|------|------|
| LinJ28_V3.0230 | <i>L. infantum</i> | 271 | 1    | 271  |
| LinJ28_V3.0250 | <i>L. infantum</i> | 55  | 14   | 68   |
| LinJ28_V3.0270 | <i>L. infantum</i> | 70  | 1    | 70   |
| LinJ28_V3.0270 | <i>L. infantum</i> | 57  | 93   | 149  |
| LinJ28_V3.0270 | <i>L. infantum</i> | 60  | 221  | 280  |
| LinJ28_V3.0280 | <i>L. infantum</i> | 176 | 362  | 537  |
| LinJ28_V3.0300 | <i>L. infantum</i> | 99  | 1    | 99   |
| LinJ28_V3.0300 | <i>L. infantum</i> | 73  | 239  | 311  |
| LinJ28_V3.0310 | <i>L. infantum</i> | 61  | 74   | 134  |
| LinJ28_V3.0310 | <i>L. infantum</i> | 57  | 814  | 870  |
| LinJ28_V3.0320 | <i>L. infantum</i> | 45  | 233  | 277  |
| LinJ28_V3.0330 | <i>L. infantum</i> | 54  | 228  | 281  |
| LinJ28_V3.0340 | <i>L. infantum</i> | 64  | 158  | 221  |
| LinJ28_V3.0340 | <i>L. infantum</i> | 43  | 266  | 308  |
| LinJ28_V3.0340 | <i>L. infantum</i> | 43  | 266  | 308  |
| LinJ28_V3.0350 | <i>L. infantum</i> | 45  | 34   | 78   |
| LinJ28_V3.0350 | <i>L. infantum</i> | 79  | 276  | 354  |
| LinJ28_V3.0380 | <i>L. infantum</i> | 149 | 1    | 149  |
| LinJ28_V3.0380 | <i>L. infantum</i> | 74  | 228  | 301  |
| LinJ28_V3.0380 | <i>L. infantum</i> | 65  | 308  | 372  |
| LinJ28_V3.0380 | <i>L. infantum</i> | 75  | 464  | 538  |
| LinJ28_V3.0380 | <i>L. infantum</i> | 67  | 722  | 788  |
| LinJ28_V3.0380 | <i>L. infantum</i> | 104 | 826  | 929  |
| LinJ28_V3.0390 | <i>L. infantum</i> | 59  | 1    | 59   |
| LinJ28_V3.0390 | <i>L. infantum</i> | 146 | 150  | 295  |
| LinJ28_V3.0400 | <i>L. infantum</i> | 72  | 302  | 373  |
| LinJ28_V3.0410 | <i>L. infantum</i> | 43  | 173  | 215  |
| LinJ28_V3.0420 | <i>L. infantum</i> | 77  | 77   | 153  |
| LinJ28_V3.0430 | <i>L. infantum</i> | 51  | 137  | 187  |
| LinJ28_V3.0440 | <i>L. infantum</i> | 107 | 1    | 107  |
| LinJ28_V3.0440 | <i>L. infantum</i> | 106 | 293  | 398  |
| LinJ28_V3.0440 | <i>L. infantum</i> | 58  | 480  | 537  |
| LinJ28_V3.0440 | <i>L. infantum</i> | 62  | 572  | 633  |
| LinJ28_V3.0470 | <i>L. infantum</i> | 62  | 859  | 920  |
| LinJ28_V3.0530 | <i>L. infantum</i> | 119 | 137  | 255  |
| LinJ28_V3.0560 | <i>L. infantum</i> | 173 | 198  | 370  |
| LinJ28_V3.0560 | <i>L. infantum</i> | 82  | 378  | 459  |
| LinJ28_V3.0560 | <i>L. infantum</i> | 88  | 465  | 552  |
| LinJ28_V3.0560 | <i>L. infantum</i> | 52  | 693  | 744  |
| LinJ28_V3.0560 | <i>L. infantum</i> | 178 | 815  | 992  |
| LinJ28_V3.0560 | <i>L. infantum</i> | 102 | 1006 | 1107 |
| LinJ28_V3.0580 | <i>L. infantum</i> | 57  | 1    | 57   |
| LinJ28_V3.0590 | <i>L. infantum</i> | 59  | 166  | 224  |
| LinJ28_V3.0590 | <i>L. infantum</i> | 41  | 246  | 286  |
| LinJ28_V3.0590 | <i>L. infantum</i> | 41  | 246  | 286  |
| LinJ28_V3.0620 | <i>L. infantum</i> | 61  | 150  | 210  |
| LinJ28_V3.0620 | <i>L. infantum</i> | 56  | 299  | 354  |

|                |                    |     |      |      |
|----------------|--------------------|-----|------|------|
| LinJ28_V3.0620 | <i>L. infantum</i> | 642 | 390  | 1031 |
| LinJ28_V3.0620 | <i>L. infantum</i> | 541 | 1034 | 1574 |
| LinJ28_V3.0630 | <i>L. infantum</i> | 91  | 1    | 91   |
| LinJ28_V3.0630 | <i>L. infantum</i> | 202 | 122  | 323  |
| LinJ28_V3.0630 | <i>L. infantum</i> | 147 | 355  | 501  |
| LinJ28_V3.0650 | <i>L. infantum</i> | 42  | 1    | 42   |
| LinJ28_V3.0650 | <i>L. infantum</i> | 55  | 819  | 873  |
| LinJ28_V3.0650 | <i>L. infantum</i> | 119 | 2755 | 2873 |
| LinJ28_V3.0650 | <i>L. infantum</i> | 80  | 3307 | 3386 |
| LinJ28_V3.0660 | <i>L. infantum</i> | 180 | 269  | 448  |
| LinJ28_V3.0660 | <i>L. infantum</i> | 40  | 1029 | 1068 |
| LinJ28_V3.0690 | <i>L. infantum</i> | 50  | 15   | 64   |
| LinJ28_V3.0720 | <i>L. infantum</i> | 89  | 145  | 233  |
| LinJ28_V3.0740 | <i>L. infantum</i> | 166 | 251  | 416  |
| LinJ28_V3.0750 | <i>L. infantum</i> | 58  | 117  | 174  |
| LinJ28_V3.0750 | <i>L. infantum</i> | 53  | 198  | 250  |
| LinJ28_V3.0760 | <i>L. infantum</i> | 51  | 459  | 509  |
| LinJ28_V3.0770 | <i>L. infantum</i> | 40  | 1    | 40   |
| LinJ28_V3.0770 | <i>L. infantum</i> | 94  | 43   | 136  |
| LinJ28_V3.0770 | <i>L. infantum</i> | 294 | 267  | 560  |
| LinJ28_V3.0790 | <i>L. infantum</i> | 53  | 69   | 121  |
| LinJ28_V3.0790 | <i>L. infantum</i> | 128 | 175  | 302  |
| LinJ28_V3.0790 | <i>L. infantum</i> | 43  | 352  | 394  |
| LinJ28_V3.0800 | <i>L. infantum</i> | 113 | 1    | 113  |
| LinJ28_V3.0800 | <i>L. infantum</i> | 60  | 163  | 222  |
| LinJ28_V3.0810 | <i>L. infantum</i> | 77  | 660  | 736  |
| LinJ28_V3.0840 | <i>L. infantum</i> | 46  | 41   | 86   |
| LinJ28_V3.0840 | <i>L. infantum</i> | 66  | 375  | 440  |
| LinJ28_V3.0840 | <i>L. infantum</i> | 66  | 375  | 440  |
| LinJ28_V3.0880 | <i>L. infantum</i> | 102 | 11   | 112  |
| LinJ28_V3.0880 | <i>L. infantum</i> | 262 | 198  | 459  |
| LinJ28_V3.0900 | <i>L. infantum</i> | 83  | 61   | 143  |
| LinJ28_V3.0910 | <i>L. infantum</i> | 75  | 24   | 98   |
| LinJ28_V3.0920 | <i>L. infantum</i> | 61  | 49   | 109  |
| LinJ28_V3.0930 | <i>L. infantum</i> | 55  | 1    | 55   |
| LinJ28_V3.0930 | <i>L. infantum</i> | 56  | 168  | 223  |
| LinJ28_V3.0930 | <i>L. infantum</i> | 80  | 779  | 858  |
| LinJ28_V3.0940 | <i>L. infantum</i> | 185 | 1    | 185  |
| LinJ28_V3.0940 | <i>L. infantum</i> | 77  | 709  | 785  |
| LinJ28_V3.0950 | <i>L. infantum</i> | 380 | 65   | 444  |
| LinJ28_V3.0990 | <i>L. infantum</i> | 65  | 47   | 111  |
| LinJ28_V3.0990 | <i>L. infantum</i> | 191 | 113  | 303  |
| LinJ28_V3.0990 | <i>L. infantum</i> | 191 | 113  | 303  |
| LinJ28_V3.1000 | <i>L. infantum</i> | 49  | 1    | 49   |
| LinJ28_V3.1000 | <i>L. infantum</i> | 248 | 60   | 307  |
| LinJ28_V3.1000 | <i>L. infantum</i> | 176 | 416  | 591  |
| LinJ28_V3.1000 | <i>L. infantum</i> | 94  | 721  | 814  |

|                |                    |     |      |      |
|----------------|--------------------|-----|------|------|
| LinJ28_V3.1000 | <i>L. infantum</i> | 522 | 839  | 1360 |
| LinJ28_V3.1010 | <i>L. infantum</i> | 65  | 125  | 189  |
| LinJ28_V3.1020 | <i>L. infantum</i> | 42  | 141  | 182  |
| LinJ28_V3.1020 | <i>L. infantum</i> | 77  | 335  | 411  |
| LinJ28_V3.1020 | <i>L. infantum</i> | 77  | 335  | 411  |
| LinJ28_V3.1030 | <i>L. infantum</i> | 40  | 1    | 40   |
| LinJ28_V3.1030 | <i>L. infantum</i> | 120 | 95   | 214  |
| LinJ28_V3.1030 | <i>L. infantum</i> | 62  | 233  | 294  |
| LinJ28_V3.1050 | <i>L. infantum</i> | 49  | 96   | 144  |
| LinJ28_V3.1060 | <i>L. infantum</i> | 50  | 81   | 130  |
| LinJ28_V3.1070 | <i>L. infantum</i> | 45  | 196  | 240  |
| LinJ28_V3.1090 | <i>L. infantum</i> | 48  | 145  | 192  |
| LinJ28_V3.1090 | <i>L. infantum</i> | 51  | 634  | 684  |
| LinJ28_V3.1090 | <i>L. infantum</i> | 59  | 881  | 939  |
| LinJ28_V3.1110 | <i>L. infantum</i> | 90  | 157  | 246  |
| LinJ28_V3.1110 | <i>L. infantum</i> | 42  | 333  | 374  |
| LinJ28_V3.1130 | <i>L. infantum</i> | 201 | 125  | 325  |
| LinJ28_V3.1130 | <i>L. infantum</i> | 117 | 382  | 498  |
| LinJ28_V3.1130 | <i>L. infantum</i> | 85  | 598  | 682  |
| LinJ28_V3.1130 | <i>L. infantum</i> | 77  | 707  | 783  |
| LinJ28_V3.1130 | <i>L. infantum</i> | 145 | 798  | 942  |
| LinJ28_V3.1150 | <i>L. infantum</i> | 405 | 1    | 405  |
| LinJ28_V3.1160 | <i>L. infantum</i> | 210 | 1    | 210  |
| LinJ28_V3.1160 | <i>L. infantum</i> | 258 | 216  | 473  |
| LinJ28_V3.1160 | <i>L. infantum</i> | 43  | 770  | 812  |
| LinJ28_V3.1160 | <i>L. infantum</i> | 57  | 870  | 926  |
| LinJ28_V3.1160 | <i>L. infantum</i> | 49  | 940  | 988  |
| LinJ28_V3.1160 | <i>L. infantum</i> | 118 | 1175 | 1292 |
| LinJ28_V3.1170 | <i>L. infantum</i> | 52  | 14   | 65   |
| LinJ28_V3.1170 | <i>L. infantum</i> | 67  | 75   | 141  |
| LinJ28_V3.1170 | <i>L. infantum</i> | 97  | 526  | 622  |
| LinJ28_V3.1170 | <i>L. infantum</i> | 99  | 624  | 722  |
| LinJ28_V3.1180 | <i>L. infantum</i> | 40  | 434  | 473  |
| LinJ28_V3.1180 | <i>L. infantum</i> | 81  | 654  | 734  |
| LinJ28_V3.1180 | <i>L. infantum</i> | 81  | 654  | 734  |
| LinJ28_V3.1190 | <i>L. infantum</i> | 65  | 91   | 155  |
| LinJ28_V3.1200 | <i>L. infantum</i> | 186 | 197  | 382  |
| LinJ28_V3.1200 | <i>L. infantum</i> | 62  | 706  | 767  |
| LinJ28_V3.1220 | <i>L. infantum</i> | 44  | 1    | 44   |
| LinJ28_V3.1230 | <i>L. infantum</i> | 85  | 1    | 85   |
| LinJ28_V3.1270 | <i>L. infantum</i> | 93  | 274  | 366  |
| LinJ28_V3.1270 | <i>L. infantum</i> | 49  | 729  | 777  |
| LinJ28_V3.1270 | <i>L. infantum</i> | 83  | 818  | 900  |
| LinJ28_V3.1280 | <i>L. infantum</i> | 90  | 29   | 118  |
| LinJ28_V3.1290 | <i>L. infantum</i> | 129 | 43   | 171  |
| LinJ28_V3.1310 | <i>L. infantum</i> | 113 | 515  | 627  |
| LinJ28_V3.1320 | <i>L. infantum</i> | 274 | 9    | 282  |

|                |                    |     |     |      |
|----------------|--------------------|-----|-----|------|
| LinJ28_V3.1320 | <i>L. infantum</i> | 292 | 307 | 598  |
| LinJ28_V3.1320 | <i>L. infantum</i> | 51  | 613 | 663  |
| LinJ28_V3.1320 | <i>L. infantum</i> | 72  | 673 | 744  |
| LinJ28_V3.1330 | <i>L. infantum</i> | 148 | 159 | 306  |
| LinJ28_V3.1330 | <i>L. infantum</i> | 69  | 399 | 467  |
| LinJ28_V3.1360 | <i>L. infantum</i> | 129 | 100 | 228  |
| LinJ28_V3.1360 | <i>L. infantum</i> | 119 | 320 | 438  |
| LinJ28_V3.1370 | <i>L. infantum</i> | 122 | 1   | 122  |
| LinJ28_V3.1370 | <i>L. infantum</i> | 126 | 139 | 264  |
| LinJ28_V3.1370 | <i>L. infantum</i> | 71  | 289 | 359  |
| LinJ28_V3.1370 | <i>L. infantum</i> | 100 | 425 | 524  |
| LinJ28_V3.1370 | <i>L. infantum</i> | 40  | 564 | 603  |
| LinJ28_V3.1370 | <i>L. infantum</i> | 59  | 753 | 811  |
| LinJ28_V3.1370 | <i>L. infantum</i> | 50  | 852 | 901  |
| LinJ28_V3.1370 | <i>L. infantum</i> | 141 | 983 | 1123 |
| LinJ28_V3.1380 | <i>L. infantum</i> | 88  | 95  | 182  |
| LinJ28_V3.1380 | <i>L. infantum</i> | 55  | 289 | 343  |
| LinJ28_V3.1400 | <i>L. infantum</i> | 59  | 258 | 316  |
| LinJ28_V3.1400 | <i>L. infantum</i> | 56  | 346 | 401  |
| LinJ28_V3.1410 | <i>L. infantum</i> | 147 | 1   | 147  |
| LinJ28_V3.1410 | <i>L. infantum</i> | 43  | 356 | 398  |
| LinJ28_V3.1420 | <i>L. infantum</i> | 75  | 1   | 75   |
| LinJ28_V3.1420 | <i>L. infantum</i> | 85  | 538 | 622  |
| LinJ28_V3.1420 | <i>L. infantum</i> | 248 | 653 | 900  |
| LinJ28_V3.1430 | <i>L. infantum</i> | 60  | 1   | 60   |
| LinJ28_V3.1440 | <i>L. infantum</i> | 77  | 1   | 77   |
| LinJ28_V3.1440 | <i>L. infantum</i> | 116 | 87  | 202  |
| LinJ28_V3.1440 | <i>L. infantum</i> | 48  | 303 | 350  |
| LinJ28_V3.1490 | <i>L. infantum</i> | 48  | 97  | 144  |
| LinJ28_V3.1500 | <i>L. infantum</i> | 114 | 1   | 114  |
| LinJ28_V3.1510 | <i>L. infantum</i> | 287 | 1   | 287  |
| LinJ28_V3.1520 | <i>L. infantum</i> | 338 | 61  | 398  |
| LinJ28_V3.1530 | <i>L. infantum</i> | 143 | 1   | 143  |
| LinJ28_V3.1530 | <i>L. infantum</i> | 46  | 147 | 192  |
| LinJ28_V3.1530 | <i>L. infantum</i> | 154 | 600 | 753  |
| LinJ28_V3.1540 | <i>L. infantum</i> | 72  | 1   | 72   |
| LinJ28_V3.1540 | <i>L. infantum</i> | 61  | 75  | 135  |
| LinJ28_V3.1540 | <i>L. infantum</i> | 113 | 486 | 598  |
| LinJ28_V3.1550 | <i>L. infantum</i> | 60  | 220 | 279  |
| LinJ28_V3.1550 | <i>L. infantum</i> | 40  | 370 | 409  |
| LinJ28_V3.1560 | <i>L. infantum</i> | 59  | 1   | 59   |
| LinJ28_V3.1560 | <i>L. infantum</i> | 69  | 295 | 363  |
| LinJ28_V3.1560 | <i>L. infantum</i> | 69  | 295 | 363  |
| LinJ28_V3.1570 | <i>L. infantum</i> | 151 | 1   | 151  |
| LinJ28_V3.1570 | <i>L. infantum</i> | 101 | 183 | 283  |
| LinJ28_V3.1570 | <i>L. infantum</i> | 51  | 287 | 337  |
| LinJ28_V3.1570 | <i>L. infantum</i> | 52  | 471 | 522  |

|                |                    |     |      |      |
|----------------|--------------------|-----|------|------|
| LinJ28_V3.1570 | <i>L. infantum</i> | 58  | 555  | 612  |
| LinJ28_V3.1570 | <i>L. infantum</i> | 68  | 648  | 715  |
| LinJ28_V3.1590 | <i>L. infantum</i> | 61  | 1    | 61   |
| LinJ28_V3.1590 | <i>L. infantum</i> | 80  | 90   | 169  |
| LinJ28_V3.1640 | <i>L. infantum</i> | 165 | 1    | 165  |
| LinJ28_V3.1650 | <i>L. infantum</i> | 126 | 141  | 266  |
| LinJ28_V3.1650 | <i>L. infantum</i> | 350 | 293  | 642  |
| LinJ28_V3.1670 | <i>L. infantum</i> | 136 | 1    | 136  |
| LinJ28_V3.1670 | <i>L. infantum</i> | 224 | 168  | 391  |
| LinJ28_V3.1670 | <i>L. infantum</i> | 154 | 590  | 743  |
| LinJ28_V3.1670 | <i>L. infantum</i> | 74  | 787  | 860  |
| LinJ28_V3.1690 | <i>L. infantum</i> | 184 | 27   | 210  |
| LinJ28_V3.1690 | <i>L. infantum</i> | 101 | 233  | 333  |
| LinJ28_V3.1690 | <i>L. infantum</i> | 154 | 408  | 561  |
| LinJ28_V3.1730 | <i>L. infantum</i> | 205 | 1    | 205  |
| LinJ28_V3.1730 | <i>L. infantum</i> | 71  | 247  | 317  |
| LinJ28_V3.1730 | <i>L. infantum</i> | 53  | 618  | 670  |
| LinJ28_V3.1730 | <i>L. infantum</i> | 46  | 742  | 787  |
| LinJ28_V3.1730 | <i>L. infantum</i> | 53  | 1171 | 1223 |
| LinJ28_V3.1740 | <i>L. infantum</i> | 111 | 1    | 111  |
| LinJ28_V3.1740 | <i>L. infantum</i> | 166 | 167  | 332  |
| LinJ28_V3.1750 | <i>L. infantum</i> | 60  | 1    | 60   |
| LinJ28_V3.1750 | <i>L. infantum</i> | 62  | 608  | 669  |
| LinJ28_V3.1750 | <i>L. infantum</i> | 62  | 608  | 669  |
| LinJ28_V3.1760 | <i>L. infantum</i> | 92  | 251  | 342  |
| LinJ28_V3.1760 | <i>L. infantum</i> | 95  | 445  | 539  |
| LinJ28_V3.1760 | <i>L. infantum</i> | 95  | 445  | 539  |
| LinJ28_V3.1770 | <i>L. infantum</i> | 55  | 1    | 55   |
| LinJ28_V3.1770 | <i>L. infantum</i> | 40  | 163  | 202  |
| LinJ28_V3.1770 | <i>L. infantum</i> | 69  | 309  | 377  |
| LinJ28_V3.1770 | <i>L. infantum</i> | 102 | 437  | 538  |
| LinJ28_V3.1770 | <i>L. infantum</i> | 601 | 757  | 1357 |
| LinJ28_V3.1780 | <i>L. infantum</i> | 261 | 226  | 486  |
| LinJ28_V3.1780 | <i>L. infantum</i> | 244 | 508  | 751  |
| LinJ28_V3.1790 | <i>L. infantum</i> | 115 | 141  | 255  |
| LinJ28_V3.1800 | <i>L. infantum</i> | 75  | 15   | 89   |
| LinJ28_V3.1800 | <i>L. infantum</i> | 154 | 298  | 451  |
| LinJ28_V3.1800 | <i>L. infantum</i> | 40  | 487  | 526  |
| LinJ28_V3.1800 | <i>L. infantum</i> | 101 | 538  | 638  |
| LinJ28_V3.1800 | <i>L. infantum</i> | 55  | 997  | 1051 |
| LinJ28_V3.1800 | <i>L. infantum</i> | 143 | 1181 | 1323 |
| LinJ28_V3.1810 | <i>L. infantum</i> | 116 | 648  | 763  |
| LinJ28_V3.1810 | <i>L. infantum</i> | 40  | 826  | 865  |
| LinJ28_V3.1810 | <i>L. infantum</i> | 51  | 888  | 938  |
| LinJ28_V3.1810 | <i>L. infantum</i> | 101 | 1081 | 1181 |
| LinJ28_V3.1810 | <i>L. infantum</i> | 187 | 1231 | 1417 |
| LinJ28_V3.1810 | <i>L. infantum</i> | 106 | 1738 | 1843 |



|                |                    |     |      |      |
|----------------|--------------------|-----|------|------|
| LinJ28_V3.1810 | <i>L. infantum</i> | 134 | 1851 | 1984 |
| LinJ28_V3.1820 | <i>L. infantum</i> | 93  | 1    | 93   |
| LinJ28_V3.1820 | <i>L. infantum</i> | 42  | 169  | 210  |
| LinJ28_V3.1820 | <i>L. infantum</i> | 41  | 382  | 422  |
| LinJ28_V3.1830 | <i>L. infantum</i> | 64  | 1    | 64   |
| LinJ28_V3.1830 | <i>L. infantum</i> | 268 | 81   | 348  |
| LinJ28_V3.1830 | <i>L. infantum</i> | 53  | 379  | 431  |
| LinJ28_V3.1830 | <i>L. infantum</i> | 116 | 480  | 595  |
| LinJ28_V3.1830 | <i>L. infantum</i> | 104 | 599  | 702  |
| LinJ28_V3.1830 | <i>L. infantum</i> | 130 | 717  | 846  |
| LinJ28_V3.1830 | <i>L. infantum</i> | 142 | 877  | 1018 |
| LinJ28_V3.1830 | <i>L. infantum</i> | 110 | 1042 | 1151 |
| LinJ28_V3.1830 | <i>L. infantum</i> | 220 | 1191 | 1410 |
| LinJ28_V3.1830 | <i>L. infantum</i> | 62  | 1427 | 1488 |
| LinJ28_V3.1830 | <i>L. infantum</i> | 381 | 1496 | 1876 |
| LinJ28_V3.1830 | <i>L. infantum</i> | 208 | 1956 | 2163 |
| LinJ28_V3.1830 | <i>L. infantum</i> | 90  | 2368 | 2457 |
| LinJ28_V3.1840 | <i>L. infantum</i> | 115 | 1    | 115  |
| LinJ28_V3.1840 | <i>L. infantum</i> | 71  | 137  | 207  |
| LinJ28_V3.1840 | <i>L. infantum</i> | 72  | 216  | 287  |
| LinJ28_V3.1850 | <i>L. infantum</i> | 53  | 287  | 339  |
| LinJ28_V3.1850 | <i>L. infantum</i> | 104 | 822  | 925  |
| LinJ28_V3.1860 | <i>L. infantum</i> | 129 | 113  | 241  |
| LinJ28_V3.1860 | <i>L. infantum</i> | 88  | 404  | 491  |
| LinJ28_V3.1870 | <i>L. infantum</i> | 88  | 55   | 142  |
| LinJ28_V3.1870 | <i>L. infantum</i> | 115 | 201  | 315  |
| LinJ28_V3.1870 | <i>L. infantum</i> | 68  | 381  | 448  |
| LinJ28_V3.1870 | <i>L. infantum</i> | 57  | 567  | 623  |
| LinJ28_V3.1870 | <i>L. infantum</i> | 72  | 644  | 715  |
| LinJ28_V3.1870 | <i>L. infantum</i> | 92  | 837  | 928  |
| LinJ28_V3.1880 | <i>L. infantum</i> | 40  | 302  | 341  |
| LinJ28_V3.1880 | <i>L. infantum</i> | 147 | 517  | 663  |
| LinJ28_V3.1880 | <i>L. infantum</i> | 79  | 870  | 948  |
| LinJ28_V3.1880 | <i>L. infantum</i> | 67  | 957  | 1023 |
| LinJ28_V3.1880 | <i>L. infantum</i> | 156 | 1025 | 1180 |
| LinJ28_V3.1880 | <i>L. infantum</i> | 40  | 1589 | 1628 |
| LinJ28_V3.1890 | <i>L. infantum</i> | 183 | 81   | 263  |
| LinJ28_V3.1900 | <i>L. infantum</i> | 40  | 687  | 726  |
| LinJ28_V3.1900 | <i>L. infantum</i> | 42  | 826  | 867  |
| LinJ28_V3.1900 | <i>L. infantum</i> | 42  | 826  | 867  |
| LinJ28_V3.1920 | <i>L. infantum</i> | 129 | 1    | 129  |
| LinJ28_V3.1920 | <i>L. infantum</i> | 44  | 355  | 398  |
| LinJ28_V3.1920 | <i>L. infantum</i> | 84  | 479  | 562  |
| LinJ28_V3.1920 | <i>L. infantum</i> | 73  | 694  | 766  |
| LinJ28_V3.1920 | <i>L. infantum</i> | 45  | 1131 | 1175 |
| LinJ28_V3.1920 | <i>L. infantum</i> | 42  | 1224 | 1265 |
| LinJ28_V3.1920 | <i>L. infantum</i> | 50  | 1317 | 1366 |

|                |                    |     |      |      |
|----------------|--------------------|-----|------|------|
| LinJ28_V3.1920 | <i>L. infantum</i> | 108 | 1401 | 1508 |
| LinJ28_V3.1920 | <i>L. infantum</i> | 90  | 1545 | 1634 |
| LinJ28_V3.1920 | <i>L. infantum</i> | 148 | 1663 | 1810 |
| LinJ28_V3.1920 | <i>L. infantum</i> | 47  | 1924 | 1970 |
| LinJ28_V3.1920 | <i>L. infantum</i> | 70  | 2022 | 2091 |
| LinJ28_V3.1920 | <i>L. infantum</i> | 86  | 2175 | 2260 |
| LinJ28_V3.1930 | <i>L. infantum</i> | 73  | 28   | 100  |
| LinJ28_V3.1940 | <i>L. infantum</i> | 56  | 395  | 450  |
| LinJ28_V3.1950 | <i>L. infantum</i> | 359 | 1    | 359  |
| LinJ28_V3.1950 | <i>L. infantum</i> | 104 | 409  | 512  |
| LinJ28_V3.1950 | <i>L. infantum</i> | 48  | 626  | 673  |
| LinJ28_V3.1950 | <i>L. infantum</i> | 52  | 880  | 931  |
| LinJ28_V3.1950 | <i>L. infantum</i> | 43  | 1010 | 1052 |
| LinJ28_V3.1950 | <i>L. infantum</i> | 47  | 1219 | 1265 |
| LinJ28_V3.1970 | <i>L. infantum</i> | 240 | 1    | 240  |
| LinJ28_V3.1970 | <i>L. infantum</i> | 154 | 248  | 401  |
| LinJ28_V3.1970 | <i>L. infantum</i> | 181 | 435  | 615  |
| LinJ28_V3.1990 | <i>L. infantum</i> | 146 | 138  | 283  |
| LinJ28_V3.1990 | <i>L. infantum</i> | 68  | 324  | 391  |
| LinJ28_V3.2000 | <i>L. infantum</i> | 68  | 1    | 68   |
| LinJ28_V3.2000 | <i>L. infantum</i> | 133 | 388  | 520  |
| LinJ28_V3.2000 | <i>L. infantum</i> | 285 | 538  | 822  |
| LinJ28_V3.2000 | <i>L. infantum</i> | 43  | 1109 | 1151 |
| LinJ28_V3.2000 | <i>L. infantum</i> | 84  | 1177 | 1260 |
| LinJ28_V3.2010 | <i>L. infantum</i> | 46  | 78   | 123  |
| LinJ28_V3.2020 | <i>L. infantum</i> | 457 | 122  | 578  |
| LinJ28_V3.2030 | <i>L. infantum</i> | 340 | 1    | 340  |
| LinJ28_V3.2030 | <i>L. infantum</i> | 66  | 535  | 600  |
| LinJ28_V3.2040 | <i>L. infantum</i> | 61  | 1    | 61   |
| LinJ28_V3.2040 | <i>L. infantum</i> | 49  | 65   | 113  |
| LinJ28_V3.2050 | <i>L. infantum</i> | 57  | 49   | 105  |
| LinJ28_V3.2060 | <i>L. infantum</i> | 57  | 49   | 105  |
| LinJ28_V3.2070 | <i>L. infantum</i> | 43  | 1    | 43   |
| LinJ28_V3.2070 | <i>L. infantum</i> | 64  | 97   | 160  |
| LinJ28_V3.2070 | <i>L. infantum</i> | 44  | 196  | 239  |
| LinJ28_V3.2070 | <i>L. infantum</i> | 107 | 340  | 446  |
| LinJ28_V3.2090 | <i>L. infantum</i> | 117 | 164  | 280  |
| LinJ28_V3.2090 | <i>L. infantum</i> | 55  | 543  | 597  |
| LinJ28_V3.2090 | <i>L. infantum</i> | 55  | 543  | 597  |
| LinJ28_V3.2110 | <i>L. infantum</i> | 40  | 1    | 40   |
| LinJ28_V3.2110 | <i>L. infantum</i> | 203 | 302  | 504  |
| LinJ28_V3.2110 | <i>L. infantum</i> | 40  | 694  | 733  |
| LinJ28_V3.2110 | <i>L. infantum</i> | 44  | 925  | 968  |
| LinJ28_V3.2110 | <i>L. infantum</i> | 106 | 1075 | 1180 |
| LinJ28_V3.2110 | <i>L. infantum</i> | 113 | 1246 | 1358 |
| LinJ28_V3.2120 | <i>L. infantum</i> | 279 | 362  | 640  |
| LinJ28_V3.2120 | <i>L. infantum</i> | 108 | 646  | 753  |

|                |                    |     |      |      |
|----------------|--------------------|-----|------|------|
| LinJ28_V3.2130 | <i>L. infantum</i> | 41  | 69   | 109  |
| LinJ28_V3.2140 | <i>L. infantum</i> | 228 | 296  | 523  |
| LinJ28_V3.2140 | <i>L. infantum</i> | 55  | 582  | 636  |
| LinJ28_V3.2140 | <i>L. infantum</i> | 209 | 668  | 876  |
| LinJ28_V3.2150 | <i>L. infantum</i> | 69  | 59   | 127  |
| LinJ28_V3.2150 | <i>L. infantum</i> | 48  | 399  | 446  |
| LinJ28_V3.2160 | <i>L. infantum</i> | 272 | 27   | 298  |
| LinJ28_V3.2160 | <i>L. infantum</i> | 110 | 337  | 446  |
| LinJ28_V3.2160 | <i>L. infantum</i> | 125 | 454  | 578  |
| LinJ28_V3.2190 | <i>L. infantum</i> | 53  | 1    | 53   |
| LinJ28_V3.2220 | <i>L. infantum</i> | 41  | 46   | 86   |
| LinJ28_V3.2220 | <i>L. infantum</i> | 71  | 474  | 544  |
| LinJ28_V3.2260 | <i>L. infantum</i> | 59  | 305  | 363  |
| LinJ28_V3.2270 | <i>L. infantum</i> | 41  | 636  | 676  |
| LinJ28_V3.2290 | <i>L. infantum</i> | 46  | 456  | 501  |
| LinJ28_V3.2300 | <i>L. infantum</i> | 76  | 60   | 135  |
| LinJ28_V3.2300 | <i>L. infantum</i> | 48  | 188  | 235  |
| LinJ28_V3.2300 | <i>L. infantum</i> | 48  | 188  | 235  |
| LinJ28_V3.2320 | <i>L. infantum</i> | 142 | 115  | 256  |
| LinJ28_V3.2330 | <i>L. infantum</i> | 74  | 1    | 74   |
| LinJ28_V3.2340 | <i>L. infantum</i> | 104 | 1    | 104  |
| LinJ28_V3.2340 | <i>L. infantum</i> | 61  | 130  | 190  |
| LinJ28_V3.2340 | <i>L. infantum</i> | 43  | 251  | 293  |
| LinJ28_V3.2340 | <i>L. infantum</i> | 89  | 343  | 431  |
| LinJ28_V3.2340 | <i>L. infantum</i> | 458 | 442  | 899  |
| LinJ28_V3.2350 | <i>L. infantum</i> | 42  | 1    | 42   |
| LinJ28_V3.2350 | <i>L. infantum</i> | 47  | 244  | 290  |
| LinJ28_V3.2350 | <i>L. infantum</i> | 48  | 593  | 640  |
| LinJ28_V3.2350 | <i>L. infantum</i> | 42  | 676  | 717  |
| LinJ28_V3.2370 | <i>L. infantum</i> | 506 | 1    | 506  |
| LinJ28_V3.2390 | <i>L. infantum</i> | 66  | 33   | 98   |
| LinJ28_V3.2390 | <i>L. infantum</i> | 331 | 110  | 440  |
| LinJ28_V3.2400 | <i>L. infantum</i> | 107 | 1    | 107  |
| LinJ28_V3.2410 | <i>L. infantum</i> | 65  | 78   | 142  |
| LinJ28_V3.2440 | <i>L. infantum</i> | 156 | 366  | 521  |
| LinJ28_V3.2450 | <i>L. infantum</i> | 49  | 374  | 422  |
| LinJ28_V3.2450 | <i>L. infantum</i> | 79  | 1023 | 1101 |
| LinJ28_V3.2450 | <i>L. infantum</i> | 41  | 1119 | 1159 |
| LinJ28_V3.2450 | <i>L. infantum</i> | 80  | 1173 | 1252 |
| LinJ28_V3.2460 | <i>L. infantum</i> | 42  | 193  | 234  |
| LinJ28_V3.2460 | <i>L. infantum</i> | 121 | 511  | 631  |
| LinJ28_V3.2460 | <i>L. infantum</i> | 50  | 770  | 819  |
| LinJ28_V3.2470 | <i>L. infantum</i> | 189 | 1    | 189  |
| LinJ28_V3.2470 | <i>L. infantum</i> | 201 | 207  | 407  |
| LinJ28_V3.2470 | <i>L. infantum</i> | 50  | 419  | 468  |
| LinJ28_V3.2480 | <i>L. infantum</i> | 66  | 43   | 108  |
| LinJ28_V3.2490 | <i>L. infantum</i> | 62  | 1    | 62   |

|                |                    |      |      |      |
|----------------|--------------------|------|------|------|
| LinJ28_V3.2490 | <i>L. infantum</i> | 198  | 71   | 268  |
| LinJ28_V3.2490 | <i>L. infantum</i> | 600  | 305  | 904  |
| LinJ28_V3.2500 | <i>L. infantum</i> | 60   | 1    | 60   |
| LinJ28_V3.2500 | <i>L. infantum</i> | 61   | 161  | 221  |
| LinJ28_V3.2500 | <i>L. infantum</i> | 142  | 272  | 413  |
| LinJ28_V3.2500 | <i>L. infantum</i> | 50   | 446  | 495  |
| LinJ28_V3.2500 | <i>L. infantum</i> | 45   | 531  | 575  |
| LinJ28_V3.2510 | <i>L. infantum</i> | 70   | 216  | 285  |
| LinJ28_V3.2540 | <i>L. infantum</i> | 59   | 734  | 792  |
| LinJ28_V3.2540 | <i>L. infantum</i> | 104  | 1038 | 1141 |
| LinJ28_V3.2540 | <i>L. infantum</i> | 104  | 1038 | 1141 |
| LinJ28_V3.2550 | <i>L. infantum</i> | 43   | 199  | 241  |
| LinJ28_V3.2550 | <i>L. infantum</i> | 85   | 701  | 785  |
| LinJ28_V3.2560 | <i>L. infantum</i> | 1088 | 101  | 1188 |
| LinJ28_V3.2560 | <i>L. infantum</i> | 148  | 1210 | 1357 |
| LinJ28_V3.2570 | <i>L. infantum</i> | 61   | 293  | 353  |
| LinJ28_V3.2580 | <i>L. infantum</i> | 49   | 74   | 122  |
| LinJ28_V3.2600 | <i>L. infantum</i> | 93   | 89   | 181  |
| LinJ28_V3.2620 | <i>L. infantum</i> | 70   | 117  | 186  |
| LinJ28_V3.2620 | <i>L. infantum</i> | 90   | 228  | 317  |
| LinJ28_V3.2620 | <i>L. infantum</i> | 63   | 501  | 563  |
| LinJ28_V3.2670 | <i>L. infantum</i> | 102  | 131  | 232  |
| LinJ28_V3.2680 | <i>L. infantum</i> | 82   | 1    | 82   |
| LinJ28_V3.2680 | <i>L. infantum</i> | 261  | 171  | 431  |
| LinJ28_V3.2690 | <i>L. infantum</i> | 125  | 1    | 125  |
| LinJ28_V3.2710 | <i>L. infantum</i> | 85   | 1    | 85   |
| LinJ28_V3.2710 | <i>L. infantum</i> | 81   | 243  | 323  |
| LinJ28_V3.2710 | <i>L. infantum</i> | 90   | 362  | 451  |
| LinJ28_V3.2720 | <i>L. infantum</i> | 87   | 1    | 87   |
| LinJ28_V3.2720 | <i>L. infantum</i> | 74   | 147  | 220  |
| LinJ28_V3.2720 | <i>L. infantum</i> | 152  | 531  | 682  |
| LinJ28_V3.2730 | <i>L. infantum</i> | 608  | 19   | 626  |
| LinJ28_V3.2730 | <i>L. infantum</i> | 45   | 725  | 769  |
| LinJ28_V3.2730 | <i>L. infantum</i> | 60   | 874  | 933  |
| LinJ28_V3.2730 | <i>L. infantum</i> | 49   | 1118 | 1166 |
| LinJ28_V3.2730 | <i>L. infantum</i> | 42   | 1242 | 1283 |
| LinJ28_V3.2740 | <i>L. infantum</i> | 107  | 202  | 308  |
| LinJ28_V3.2740 | <i>L. infantum</i> | 84   | 362  | 445  |
| LinJ28_V3.2740 | <i>L. infantum</i> | 92   | 541  | 632  |
| LinJ28_V3.2740 | <i>L. infantum</i> | 118  | 864  | 981  |
| LinJ28_V3.2750 | <i>L. infantum</i> | 76   | 68   | 143  |
| LinJ28_V3.2760 | <i>L. infantum</i> | 76   | 68   | 143  |
| LinJ28_V3.2770 | <i>L. infantum</i> | 165  | 19   | 183  |
| LinJ28_V3.2780 | <i>L. infantum</i> | 69   | 1    | 69   |
| LinJ28_V3.2790 | <i>L. infantum</i> | 50   | 132  | 181  |
| LinJ28_V3.2790 | <i>L. infantum</i> | 108  | 397  | 504  |
| LinJ28_V3.2790 | <i>L. infantum</i> | 76   | 564  | 639  |

|                |                    |     |      |      |
|----------------|--------------------|-----|------|------|
| LinJ28_V3.2790 | <i>L. infantum</i> | 216 | 671  | 886  |
| LinJ28_V3.2800 | <i>L. infantum</i> | 62  | 65   | 126  |
| LinJ28_V3.2800 | <i>L. infantum</i> | 52  | 288  | 339  |
| LinJ28_V3.2800 | <i>L. infantum</i> | 52  | 288  | 339  |
| LinJ28_V3.2810 | <i>L. infantum</i> | 179 | 33   | 211  |
| LinJ28_V3.2810 | <i>L. infantum</i> | 41  | 232  | 272  |
| LinJ28_V3.2810 | <i>L. infantum</i> | 69  | 327  | 395  |
| LinJ28_V3.2810 | <i>L. infantum</i> | 41  | 539  | 579  |
| LinJ28_V3.2810 | <i>L. infantum</i> | 60  | 723  | 782  |
| LinJ28_V3.2810 | <i>L. infantum</i> | 89  | 809  | 897  |
| LinJ28_V3.2810 | <i>L. infantum</i> | 55  | 1489 | 1543 |
| LinJ28_V3.2810 | <i>L. infantum</i> | 119 | 1581 | 1699 |
| LinJ28_V3.2820 | <i>L. infantum</i> | 52  | 559  | 610  |
| LinJ28_V3.2830 | <i>L. infantum</i> | 41  | 1    | 41   |
| LinJ28_V3.2830 | <i>L. infantum</i> | 61  | 64   | 124  |
| LinJ28_V3.2830 | <i>L. infantum</i> | 51  | 160  | 210  |
| LinJ28_V3.2840 | <i>L. infantum</i> | 122 | 1    | 122  |
| LinJ28_V3.2840 | <i>L. infantum</i> | 41  | 215  | 255  |
| LinJ28_V3.2840 | <i>L. infantum</i> | 585 | 316  | 900  |
| LinJ28_V3.2890 | <i>L. infantum</i> | 47  | 84   | 130  |
| LinJ28_V3.2890 | <i>L. infantum</i> | 43  | 331  | 373  |
| LinJ28_V3.2890 | <i>L. infantum</i> | 43  | 331  | 373  |
| LinJ28_V3.2900 | <i>L. infantum</i> | 278 | 131  | 408  |
| LinJ28_V3.2930 | <i>L. infantum</i> | 43  | 1    | 43   |
| LinJ28_V3.2930 | <i>L. infantum</i> | 60  | 120  | 179  |
| LinJ28_V3.2930 | <i>L. infantum</i> | 55  | 276  | 330  |
| LinJ28_V3.2930 | <i>L. infantum</i> | 109 | 498  | 606  |
| LinJ28_V3.2950 | <i>L. infantum</i> | 60  | 1    | 60   |
| LinJ28_V3.2950 | <i>L. infantum</i> | 47  | 575  | 621  |
| LinJ28_V3.2960 | <i>L. infantum</i> | 162 | 493  | 654  |
| LinJ28_V3.3000 | <i>L. infantum</i> | 162 | 493  | 654  |
| LinJ28_V3.3010 | <i>L. infantum</i> | 58  | 16   | 73   |
| LinJ28_V3.3010 | <i>L. infantum</i> | 56  | 146  | 201  |
| LinJ28_V3.3010 | <i>L. infantum</i> | 119 | 242  | 360  |
| LinJ28_V3.3020 | <i>L. infantum</i> | 48  | 1    | 48   |
| LinJ28_V3.3020 | <i>L. infantum</i> | 44  | 455  | 498  |
| LinJ28_V3.3020 | <i>L. infantum</i> | 44  | 455  | 498  |
| LinJ28_V3.3030 | <i>L. infantum</i> | 107 | 1    | 107  |
| LinJ28_V3.3040 | <i>L. infantum</i> | 61  | 526  | 586  |
| LinJ28_V3.3040 | <i>L. infantum</i> | 60  | 603  | 662  |
| LinJ28_V3.3050 | <i>L. infantum</i> | 41  | 193  | 233  |
| LinJ28_V3.3050 | <i>L. infantum</i> | 47  | 306  | 352  |
| LinJ28_V3.3050 | <i>L. infantum</i> | 115 | 513  | 627  |
| LinJ28_V3.3050 | <i>L. infantum</i> | 102 | 676  | 777  |
| LinJ28_V3.3060 | <i>L. infantum</i> | 60  | 1    | 60   |
| LinJ28_V3.3060 | <i>L. infantum</i> | 162 | 575  | 736  |
| LinJ28_V3.3070 | <i>L. infantum</i> | 208 | 229  | 436  |

|                |                    |     |      |      |
|----------------|--------------------|-----|------|------|
| LinJ28_V3.3080 | <i>L. infantum</i> | 42  | 1    | 42   |
| LinJ28_V3.3100 | <i>L. infantum</i> | 42  | 43   | 84   |
| LinJ28_V3.3120 | <i>L. infantum</i> | 49  | 1    | 49   |
| LinJ28_V3.3120 | <i>L. infantum</i> | 56  | 330  | 385  |
| LinJ28_V3.3120 | <i>L. infantum</i> | 56  | 330  | 385  |
| LinJ28_V3.3130 | <i>L. infantum</i> | 52  | 478  | 529  |
| LinJ28_V3.3160 | <i>L. infantum</i> | 68  | 62   | 129  |
| LinJ28_V3.3170 | <i>L. infantum</i> | 44  | 151  | 194  |
| LinJ28_V3.3180 | <i>L. infantum</i> | 92  | 245  | 336  |
| LinJ28_V3.3210 | <i>L. infantum</i> | 85  | 1    | 85   |
| LinJ28_V3.3230 | <i>L. infantum</i> | 168 | 67   | 234  |
| LinJ28_V3.3260 | <i>L. infantum</i> | 597 | 1    | 597  |
| LinJ28_V3.3260 | <i>L. infantum</i> | 60  | 638  | 697  |
| LinJ29_V3.0020 | <i>L. infantum</i> | 69  | 438  | 506  |
| LinJ29_V3.0020 | <i>L. infantum</i> | 43  | 622  | 664  |
| LinJ29_V3.0020 | <i>L. infantum</i> | 51  | 738  | 788  |
| LinJ29_V3.0020 | <i>L. infantum</i> | 135 | 911  | 1045 |
| LinJ29_V3.0030 | <i>L. infantum</i> | 72  | 396  | 467  |
| LinJ29_V3.0040 | <i>L. infantum</i> | 95  | 1    | 95   |
| LinJ29_V3.0040 | <i>L. infantum</i> | 47  | 112  | 158  |
| LinJ29_V3.0040 | <i>L. infantum</i> | 47  | 112  | 158  |
| LinJ29_V3.0050 | <i>L. infantum</i> | 40  | 188  | 227  |
| LinJ29_V3.0060 | <i>L. infantum</i> | 46  | 261  | 306  |
| LinJ29_V3.0070 | <i>L. infantum</i> | 40  | 30   | 69   |
| LinJ29_V3.0070 | <i>L. infantum</i> | 73  | 106  | 178  |
| LinJ29_V3.0070 | <i>L. infantum</i> | 73  | 106  | 178  |
| LinJ29_V3.0100 | <i>L. infantum</i> | 45  | 19   | 63   |
| LinJ29_V3.0100 | <i>L. infantum</i> | 49  | 373  | 421  |
| LinJ29_V3.0100 | <i>L. infantum</i> | 49  | 373  | 421  |
| LinJ29_V3.0110 | <i>L. infantum</i> | 531 | 1    | 531  |
| LinJ29_V3.0110 | <i>L. infantum</i> | 51  | 620  | 670  |
| LinJ29_V3.0110 | <i>L. infantum</i> | 44  | 1356 | 1399 |
| LinJ29_V3.0120 | <i>L. infantum</i> | 60  | 1    | 60   |
| LinJ29_V3.0120 | <i>L. infantum</i> | 76  | 277  | 352  |
| LinJ29_V3.0120 | <i>L. infantum</i> | 42  | 602  | 643  |
| LinJ29_V3.0130 | <i>L. infantum</i> | 52  | 59   | 110  |
| LinJ29_V3.0140 | <i>L. infantum</i> | 44  | 294  | 337  |
| LinJ29_V3.0160 | <i>L. infantum</i> | 44  | 1    | 44   |
| LinJ29_V3.0160 | <i>L. infantum</i> | 42  | 293  | 334  |
| LinJ29_V3.0160 | <i>L. infantum</i> | 42  | 293  | 334  |
| LinJ29_V3.0180 | <i>L. infantum</i> | 43  | 1    | 43   |
| LinJ29_V3.0180 | <i>L. infantum</i> | 75  | 63   | 137  |
| LinJ29_V3.0190 | <i>L. infantum</i> | 137 | 1    | 137  |
| LinJ29_V3.0190 | <i>L. infantum</i> | 61  | 237  | 297  |
| LinJ29_V3.0190 | <i>L. infantum</i> | 154 | 324  | 477  |
| LinJ29_V3.0200 | <i>L. infantum</i> | 124 | 1    | 124  |
| LinJ29_V3.0200 | <i>L. infantum</i> | 258 | 128  | 385  |

|                |                    |     |      |      |
|----------------|--------------------|-----|------|------|
| LinJ29_V3.0200 | <i>L. infantum</i> | 206 | 392  | 597  |
| LinJ29_V3.0200 | <i>L. infantum</i> | 41  | 607  | 647  |
| LinJ29_V3.0200 | <i>L. infantum</i> | 71  | 825  | 895  |
| LinJ29_V3.0200 | <i>L. infantum</i> | 97  | 919  | 1015 |
| LinJ29_V3.0210 | <i>L. infantum</i> | 42  | 438  | 479  |
| LinJ29_V3.0210 | <i>L. infantum</i> | 57  | 640  | 696  |
| LinJ29_V3.0210 | <i>L. infantum</i> | 40  | 973  | 1012 |
| LinJ29_V3.0210 | <i>L. infantum</i> | 184 | 1318 | 1501 |
| LinJ29_V3.0230 | <i>L. infantum</i> | 246 | 1    | 246  |
| LinJ29_V3.0240 | <i>L. infantum</i> | 41  | 1    | 41   |
| LinJ29_V3.0240 | <i>L. infantum</i> | 43  | 173  | 215  |
| LinJ29_V3.0240 | <i>L. infantum</i> | 43  | 173  | 215  |
| LinJ29_V3.0250 | <i>L. infantum</i> | 57  | 23   | 79   |
| LinJ29_V3.0250 | <i>L. infantum</i> | 50  | 94   | 143  |
| LinJ29_V3.0250 | <i>L. infantum</i> | 94  | 445  | 538  |
| LinJ29_V3.0270 | <i>L. infantum</i> | 51  | 1    | 51   |
| LinJ29_V3.0270 | <i>L. infantum</i> | 69  | 160  | 228  |
| LinJ29_V3.0270 | <i>L. infantum</i> | 69  | 160  | 228  |
| LinJ29_V3.0280 | <i>L. infantum</i> | 51  | 26   | 76   |
| LinJ29_V3.0280 | <i>L. infantum</i> | 83  | 80   | 162  |
| LinJ29_V3.0280 | <i>L. infantum</i> | 238 | 197  | 434  |
| LinJ29_V3.0300 | <i>L. infantum</i> | 51  | 55   | 105  |
| LinJ29_V3.0300 | <i>L. infantum</i> | 269 | 115  | 383  |
| LinJ29_V3.0310 | <i>L. infantum</i> | 77  | 1    | 77   |
| LinJ29_V3.0320 | <i>L. infantum</i> | 81  | 1    | 81   |
| LinJ29_V3.0330 | <i>L. infantum</i> | 85  | 1    | 85   |
| LinJ29_V3.0330 | <i>L. infantum</i> | 193 | 160  | 352  |
| LinJ29_V3.0340 | <i>L. infantum</i> | 89  | 1    | 89   |
| LinJ29_V3.0340 | <i>L. infantum</i> | 80  | 220  | 299  |
| LinJ29_V3.0340 | <i>L. infantum</i> | 59  | 331  | 389  |
| LinJ29_V3.0350 | <i>L. infantum</i> | 68  | 41   | 108  |
| LinJ29_V3.0350 | <i>L. infantum</i> | 102 | 241  | 342  |
| LinJ29_V3.0360 | <i>L. infantum</i> | 131 | 59   | 189  |
| LinJ29_V3.0360 | <i>L. infantum</i> | 76  | 294  | 369  |
| LinJ29_V3.0360 | <i>L. infantum</i> | 104 | 792  | 895  |
| LinJ29_V3.0360 | <i>L. infantum</i> | 77  | 989  | 1065 |
| LinJ29_V3.0360 | <i>L. infantum</i> | 66  | 1259 | 1324 |
| LinJ29_V3.0380 | <i>L. infantum</i> | 79  | 40   | 118  |
| LinJ29_V3.0380 | <i>L. infantum</i> | 149 | 156  | 304  |
| LinJ29_V3.0380 | <i>L. infantum</i> | 258 | 438  | 695  |
| LinJ29_V3.0380 | <i>L. infantum</i> | 53  | 834  | 886  |
| LinJ29_V3.0380 | <i>L. infantum</i> | 544 | 1007 | 1550 |
| LinJ29_V3.0390 | <i>L. infantum</i> | 280 | 41   | 320  |
| LinJ29_V3.0390 | <i>L. infantum</i> | 127 | 343  | 469  |
| LinJ29_V3.0390 | <i>L. infantum</i> | 133 | 493  | 625  |
| LinJ29_V3.0400 | <i>L. infantum</i> | 65  | 196  | 260  |
| LinJ29_V3.0420 | <i>L. infantum</i> | 365 | 28   | 392  |

|                |                    |     |      |      |
|----------------|--------------------|-----|------|------|
| LinJ29_V3.0420 | <i>L. infantum</i> | 151 | 409  | 559  |
| LinJ29_V3.0430 | <i>L. infantum</i> | 127 | 96   | 222  |
| LinJ29_V3.0430 | <i>L. infantum</i> | 82  | 323  | 404  |
| LinJ29_V3.0440 | <i>L. infantum</i> | 44  | 521  | 564  |
| LinJ29_V3.0460 | <i>L. infantum</i> | 112 | 1    | 112  |
| LinJ29_V3.0460 | <i>L. infantum</i> | 149 | 122  | 270  |
| LinJ29_V3.0460 | <i>L. infantum</i> | 149 | 122  | 270  |
| LinJ29_V3.0470 | <i>L. infantum</i> | 127 | 1    | 127  |
| LinJ29_V3.0470 | <i>L. infantum</i> | 59  | 136  | 194  |
| LinJ29_V3.0470 | <i>L. infantum</i> | 497 | 235  | 731  |
| LinJ29_V3.0480 | <i>L. infantum</i> | 229 | 207  | 435  |
| LinJ29_V3.0490 | <i>L. infantum</i> | 151 | 1    | 151  |
| LinJ29_V3.0490 | <i>L. infantum</i> | 48  | 271  | 318  |
| LinJ29_V3.0510 | <i>L. infantum</i> | 275 | 1    | 275  |
| LinJ29_V3.0510 | <i>L. infantum</i> | 142 | 836  | 977  |
| LinJ29_V3.0530 | <i>L. infantum</i> | 76  | 37   | 112  |
| LinJ29_V3.0530 | <i>L. infantum</i> | 63  | 170  | 232  |
| LinJ29_V3.0530 | <i>L. infantum</i> | 63  | 170  | 232  |
| LinJ29_V3.0540 | <i>L. infantum</i> | 161 | 1    | 161  |
| LinJ29_V3.0540 | <i>L. infantum</i> | 262 | 202  | 463  |
| LinJ29_V3.0540 | <i>L. infantum</i> | 144 | 482  | 625  |
| LinJ29_V3.0540 | <i>L. infantum</i> | 486 | 678  | 1163 |
| LinJ29_V3.0540 | <i>L. infantum</i> | 99  | 1187 | 1285 |
| LinJ29_V3.0540 | <i>L. infantum</i> | 88  | 1293 | 1380 |
| LinJ29_V3.0540 | <i>L. infantum</i> | 344 | 1414 | 1757 |
| LinJ29_V3.0540 | <i>L. infantum</i> | 88  | 1862 | 1949 |
| LinJ29_V3.0540 | <i>L. infantum</i> | 654 | 1964 | 2617 |
| LinJ29_V3.0540 | <i>L. infantum</i> | 148 | 2749 | 2896 |
| LinJ29_V3.0540 | <i>L. infantum</i> | 43  | 2898 | 2940 |
| LinJ29_V3.0540 | <i>L. infantum</i> | 45  | 2957 | 3001 |
| LinJ29_V3.0550 | <i>L. infantum</i> | 212 | 1    | 212  |
| LinJ29_V3.0550 | <i>L. infantum</i> | 41  | 462  | 502  |
| LinJ29_V3.0560 | <i>L. infantum</i> | 166 | 1    | 166  |
| LinJ29_V3.0560 | <i>L. infantum</i> | 64  | 195  | 258  |
| LinJ29_V3.0560 | <i>L. infantum</i> | 321 | 300  | 620  |
| LinJ29_V3.0560 | <i>L. infantum</i> | 47  | 834  | 880  |
| LinJ29_V3.0570 | <i>L. infantum</i> | 76  | 45   | 120  |
| LinJ29_V3.0580 | <i>L. infantum</i> | 66  | 1    | 66   |
| LinJ29_V3.0590 | <i>L. infantum</i> | 58  | 1    | 58   |
| LinJ29_V3.0590 | <i>L. infantum</i> | 110 | 157  | 266  |
| LinJ29_V3.0590 | <i>L. infantum</i> | 51  | 542  | 592  |
| LinJ29_V3.0600 | <i>L. infantum</i> | 54  | 1    | 54   |
| LinJ29_V3.0600 | <i>L. infantum</i> | 162 | 70   | 231  |
| LinJ29_V3.0600 | <i>L. infantum</i> | 78  | 256  | 333  |
| LinJ29_V3.0600 | <i>L. infantum</i> | 124 | 360  | 483  |
| LinJ29_V3.0610 | <i>L. infantum</i> | 173 | 149  | 321  |
| LinJ29_V3.0610 | <i>L. infantum</i> | 58  | 702  | 759  |



|                |                    |     |      |      |
|----------------|--------------------|-----|------|------|
| LinJ29_V3.0610 | <i>L. infantum</i> | 86  | 1003 | 1088 |
| LinJ29_V3.0620 | <i>L. infantum</i> | 96  | 102  | 197  |
| LinJ29_V3.0620 | <i>L. infantum</i> | 145 | 201  | 345  |
| LinJ29_V3.0620 | <i>L. infantum</i> | 44  | 377  | 420  |
| LinJ29_V3.0620 | <i>L. infantum</i> | 87  | 453  | 539  |
| LinJ29_V3.0630 | <i>L. infantum</i> | 66  | 59   | 124  |
| LinJ29_V3.0630 | <i>L. infantum</i> | 168 | 231  | 398  |
| LinJ29_V3.0630 | <i>L. infantum</i> | 196 | 420  | 615  |
| LinJ29_V3.0660 | <i>L. infantum</i> | 88  | 1    | 88   |
| LinJ29_V3.0670 | <i>L. infantum</i> | 53  | 31   | 83   |
| LinJ29_V3.0680 | <i>L. infantum</i> | 155 | 281  | 435  |
| LinJ29_V3.0680 | <i>L. infantum</i> | 54  | 443  | 496  |
| LinJ29_V3.0690 | <i>L. infantum</i> | 53  | 1    | 53   |
| LinJ29_V3.0690 | <i>L. infantum</i> | 100 | 145  | 244  |
| LinJ29_V3.0690 | <i>L. infantum</i> | 50  | 445  | 494  |
| LinJ29_V3.0690 | <i>L. infantum</i> | 57  | 530  | 586  |
| LinJ29_V3.0690 | <i>L. infantum</i> | 47  | 656  | 702  |
| LinJ29_V3.0710 | <i>L. infantum</i> | 241 | 1    | 241  |
| LinJ29_V3.0710 | <i>L. infantum</i> | 94  | 422  | 515  |
| LinJ29_V3.0710 | <i>L. infantum</i> | 175 | 600  | 774  |
| LinJ29_V3.0730 | <i>L. infantum</i> | 110 | 68   | 177  |
| LinJ29_V3.0730 | <i>L. infantum</i> | 67  | 216  | 282  |
| LinJ29_V3.0730 | <i>L. infantum</i> | 54  | 609  | 662  |
| LinJ29_V3.0740 | <i>L. infantum</i> | 60  | 351  | 410  |
| LinJ29_V3.0740 | <i>L. infantum</i> | 50  | 806  | 855  |
| LinJ29_V3.0740 | <i>L. infantum</i> | 50  | 806  | 855  |
| LinJ29_V3.0760 | <i>L. infantum</i> | 183 | 1    | 183  |
| LinJ29_V3.0770 | <i>L. infantum</i> | 53  | 321  | 373  |
| LinJ29_V3.0780 | <i>L. infantum</i> | 56  | 1    | 56   |
| LinJ29_V3.0780 | <i>L. infantum</i> | 318 | 107  | 424  |
| LinJ29_V3.0780 | <i>L. infantum</i> | 77  | 477  | 553  |
| LinJ29_V3.0780 | <i>L. infantum</i> | 66  | 610  | 675  |
| LinJ29_V3.0790 | <i>L. infantum</i> | 57  | 79   | 135  |
| LinJ29_V3.0790 | <i>L. infantum</i> | 41  | 248  | 288  |
| LinJ29_V3.0790 | <i>L. infantum</i> | 51  | 721  | 771  |
| LinJ29_V3.0800 | <i>L. infantum</i> | 102 | 1    | 102  |
| LinJ29_V3.0810 | <i>L. infantum</i> | 50  | 464  | 513  |
| LinJ29_V3.0820 | <i>L. infantum</i> | 124 | 37   | 160  |
| LinJ29_V3.0820 | <i>L. infantum</i> | 47  | 295  | 341  |
| LinJ29_V3.0820 | <i>L. infantum</i> | 47  | 437  | 483  |
| LinJ29_V3.0820 | <i>L. infantum</i> | 129 | 699  | 827  |
| LinJ29_V3.0820 | <i>L. infantum</i> | 77  | 885  | 961  |
| LinJ29_V3.0820 | <i>L. infantum</i> | 40  | 1333 | 1372 |
| LinJ29_V3.0820 | <i>L. infantum</i> | 64  | 1426 | 1489 |
| LinJ29_V3.0820 | <i>L. infantum</i> | 69  | 1525 | 1593 |
| LinJ29_V3.0830 | <i>L. infantum</i> | 203 | 1    | 203  |
| LinJ29_V3.0830 | <i>L. infantum</i> | 45  | 268  | 312  |

|                |                    |     |      |      |
|----------------|--------------------|-----|------|------|
| LinJ29_V3.0830 | <i>L. infantum</i> | 80  | 357  | 436  |
| LinJ29_V3.0830 | <i>L. infantum</i> | 208 | 491  | 698  |
| LinJ29_V3.0840 | <i>L. infantum</i> | 335 | 43   | 377  |
| LinJ29_V3.0840 | <i>L. infantum</i> | 50  | 385  | 434  |
| LinJ29_V3.0840 | <i>L. infantum</i> | 71  | 481  | 551  |
| LinJ29_V3.0850 | <i>L. infantum</i> | 80  | 92   | 171  |
| LinJ29_V3.0850 | <i>L. infantum</i> | 44  | 281  | 324  |
| LinJ29_V3.0850 | <i>L. infantum</i> | 277 | 342  | 618  |
| LinJ29_V3.0860 | <i>L. infantum</i> | 50  | 196  | 245  |
| LinJ29_V3.0870 | <i>L. infantum</i> | 158 | 1    | 158  |
| LinJ29_V3.0870 | <i>L. infantum</i> | 116 | 328  | 443  |
| LinJ29_V3.0890 | <i>L. infantum</i> | 247 | 56   | 302  |
| LinJ29_V3.0930 | <i>L. infantum</i> | 67  | 102  | 168  |
| LinJ29_V3.0940 | <i>L. infantum</i> | 44  | 217  | 260  |
| LinJ29_V3.0940 | <i>L. infantum</i> | 55  | 326  | 380  |
| LinJ29_V3.0940 | <i>L. infantum</i> | 55  | 326  | 380  |
| LinJ29_V3.0950 | <i>L. infantum</i> | 45  | 1    | 45   |
| LinJ29_V3.0960 | <i>L. infantum</i> | 40  | 310  | 349  |
| LinJ29_V3.0970 | <i>L. infantum</i> | 62  | 391  | 452  |
| LinJ29_V3.0990 | <i>L. infantum</i> | 53  | 258  | 310  |
| LinJ29_V3.1000 | <i>L. infantum</i> | 56  | 337  | 392  |
| LinJ29_V3.1000 | <i>L. infantum</i> | 42  | 461  | 502  |
| LinJ29_V3.1000 | <i>L. infantum</i> | 42  | 461  | 502  |
| LinJ29_V3.1010 | <i>L. infantum</i> | 49  | 314  | 362  |
| LinJ29_V3.1020 | <i>L. infantum</i> | 56  | 1    | 56   |
| LinJ29_V3.1040 | <i>L. infantum</i> | 146 | 18   | 163  |
| LinJ29_V3.1040 | <i>L. infantum</i> | 112 | 191  | 302  |
| LinJ29_V3.1050 | <i>L. infantum</i> | 90  | 1    | 90   |
| LinJ29_V3.1050 | <i>L. infantum</i> | 130 | 125  | 254  |
| LinJ29_V3.1050 | <i>L. infantum</i> | 173 | 260  | 432  |
| LinJ29_V3.1060 | <i>L. infantum</i> | 583 | 376  | 958  |
| LinJ29_V3.1060 | <i>L. infantum</i> | 516 | 1024 | 1539 |
| LinJ29_V3.1060 | <i>L. infantum</i> | 52  | 1552 | 1603 |
| LinJ29_V3.1070 | <i>L. infantum</i> | 248 | 1    | 248  |
| LinJ29_V3.1070 | <i>L. infantum</i> | 75  | 281  | 355  |
| LinJ29_V3.1070 | <i>L. infantum</i> | 172 | 376  | 547  |
| LinJ29_V3.1080 | <i>L. infantum</i> | 47  | 1    | 47   |
| LinJ29_V3.1080 | <i>L. infantum</i> | 256 | 70   | 325  |
| LinJ29_V3.1080 | <i>L. infantum</i> | 112 | 331  | 442  |
| LinJ29_V3.1080 | <i>L. infantum</i> | 59  | 498  | 556  |
| LinJ29_V3.1090 | <i>L. infantum</i> | 93  | 39   | 131  |
| LinJ29_V3.1090 | <i>L. infantum</i> | 149 | 195  | 343  |
| LinJ29_V3.1090 | <i>L. infantum</i> | 278 | 345  | 622  |
| LinJ29_V3.1110 | <i>L. infantum</i> | 88  | 1    | 88   |
| LinJ29_V3.1110 | <i>L. infantum</i> | 219 | 196  | 414  |
| LinJ29_V3.1110 | <i>L. infantum</i> | 50  | 521  | 570  |
| LinJ29_V3.1110 | <i>L. infantum</i> | 40  | 631  | 670  |

|                |                    |     |      |      |
|----------------|--------------------|-----|------|------|
| LinJ29_V3.1120 | <i>L. infantum</i> | 147 | 1    | 147  |
| LinJ29_V3.1130 | <i>L. infantum</i> | 55  | 1    | 55   |
| LinJ29_V3.1130 | <i>L. infantum</i> | 41  | 264  | 304  |
| LinJ29_V3.1130 | <i>L. infantum</i> | 226 | 827  | 1052 |
| LinJ29_V3.1130 | <i>L. infantum</i> | 154 | 1131 | 1284 |
| LinJ29_V3.1130 | <i>L. infantum</i> | 112 | 1315 | 1426 |
| LinJ29_V3.1130 | <i>L. infantum</i> | 145 | 1526 | 1670 |
| LinJ29_V3.1130 | <i>L. infantum</i> | 77  | 1822 | 1898 |
| LinJ29_V3.1140 | <i>L. infantum</i> | 54  | 60   | 113  |
| LinJ29_V3.1140 | <i>L. infantum</i> | 44  | 188  | 231  |
| LinJ29_V3.1140 | <i>L. infantum</i> | 94  | 302  | 395  |
| LinJ29_V3.1140 | <i>L. infantum</i> | 64  | 535  | 598  |
| LinJ29_V3.1150 | <i>L. infantum</i> | 50  | 1    | 50   |
| LinJ29_V3.1150 | <i>L. infantum</i> | 104 | 54   | 157  |
| LinJ29_V3.1150 | <i>L. infantum</i> | 96  | 194  | 289  |
| LinJ29_V3.1150 | <i>L. infantum</i> | 40  | 300  | 339  |
| LinJ29_V3.1150 | <i>L. infantum</i> | 102 | 355  | 456  |
| LinJ29_V3.1150 | <i>L. infantum</i> | 292 | 459  | 750  |
| LinJ29_V3.1150 | <i>L. infantum</i> | 155 | 790  | 944  |
| LinJ29_V3.1160 | <i>L. infantum</i> | 85  | 289  | 373  |
| LinJ29_V3.1170 | <i>L. infantum</i> | 85  | 289  | 373  |
| LinJ29_V3.1180 | <i>L. infantum</i> | 85  | 289  | 373  |
| LinJ29_V3.1190 | <i>L. infantum</i> | 55  | 306  | 360  |
| LinJ29_V3.1200 | <i>L. infantum</i> | 60  | 117  | 176  |
| LinJ29_V3.1200 | <i>L. infantum</i> | 46  | 579  | 624  |
| LinJ29_V3.1200 | <i>L. infantum</i> | 46  | 579  | 624  |
| LinJ29_V3.1210 | <i>L. infantum</i> | 118 | 195  | 312  |
| LinJ29_V3.1210 | <i>L. infantum</i> | 176 | 334  | 509  |
| LinJ29_V3.1210 | <i>L. infantum</i> | 82  | 537  | 618  |
| LinJ29_V3.1210 | <i>L. infantum</i> | 178 | 653  | 830  |
| LinJ29_V3.1220 | <i>L. infantum</i> | 95  | 79   | 173  |
| LinJ29_V3.1220 | <i>L. infantum</i> | 60  | 244  | 303  |
| LinJ29_V3.1220 | <i>L. infantum</i> | 60  | 244  | 303  |
| LinJ29_V3.1230 | <i>L. infantum</i> | 100 | 79   | 178  |
| LinJ29_V3.1260 | <i>L. infantum</i> | 114 | 145  | 258  |
| LinJ29_V3.1270 | <i>L. infantum</i> | 139 | 91   | 229  |
| LinJ29_V3.1270 | <i>L. infantum</i> | 137 | 253  | 389  |
| LinJ29_V3.1270 | <i>L. infantum</i> | 174 | 416  | 589  |
| LinJ29_V3.1270 | <i>L. infantum</i> | 284 | 707  | 990  |
| LinJ29_V3.1270 | <i>L. infantum</i> | 274 | 1050 | 1323 |
| LinJ29_V3.1270 | <i>L. infantum</i> | 100 | 1330 | 1429 |
| LinJ29_V3.1270 | <i>L. infantum</i> | 54  | 1478 | 1531 |
| LinJ29_V3.1270 | <i>L. infantum</i> | 59  | 1555 | 1613 |
| LinJ29_V3.1270 | <i>L. infantum</i> | 42  | 1680 | 1721 |
| LinJ29_V3.1270 | <i>L. infantum</i> | 83  | 1775 | 1857 |
| LinJ29_V3.1270 | <i>L. infantum</i> | 228 | 1978 | 2205 |
| LinJ29_V3.1270 | <i>L. infantum</i> | 194 | 2246 | 2439 |

|                |                    |     |      |      |
|----------------|--------------------|-----|------|------|
| LinJ29_V3.1280 | <i>L. infantum</i> | 69  | 42   | 110  |
| LinJ29_V3.1280 | <i>L. infantum</i> | 74  | 251  | 324  |
| LinJ29_V3.1280 | <i>L. infantum</i> | 74  | 251  | 324  |
| LinJ29_V3.1290 | <i>L. infantum</i> | 105 | 382  | 486  |
| LinJ29_V3.1300 | <i>L. infantum</i> | 47  | 47   | 93   |
| LinJ29_V3.1310 | <i>L. infantum</i> | 343 | 135  | 477  |
| LinJ29_V3.1320 | <i>L. infantum</i> | 289 | 1    | 289  |
| LinJ29_V3.1320 | <i>L. infantum</i> | 923 | 291  | 1213 |
| LinJ29_V3.1320 | <i>L. infantum</i> | 48  | 1254 | 1301 |
| LinJ29_V3.1320 | <i>L. infantum</i> | 67  | 1418 | 1484 |
| LinJ29_V3.1320 | <i>L. infantum</i> | 75  | 1537 | 1611 |
| LinJ29_V3.1320 | <i>L. infantum</i> | 41  | 1659 | 1699 |
| LinJ29_V3.1320 | <i>L. infantum</i> | 355 | 1804 | 2158 |
| LinJ29_V3.1330 | <i>L. infantum</i> | 67  | 529  | 595  |
| LinJ29_V3.1330 | <i>L. infantum</i> | 48  | 678  | 725  |
| LinJ29_V3.1330 | <i>L. infantum</i> | 48  | 678  | 725  |
| LinJ29_V3.1340 | <i>L. infantum</i> | 96  | 37   | 132  |
| LinJ29_V3.1340 | <i>L. infantum</i> | 899 | 172  | 1070 |
| LinJ29_V3.1340 | <i>L. infantum</i> | 186 | 1076 | 1261 |
| LinJ29_V3.1340 | <i>L. infantum</i> | 525 | 1292 | 1816 |
| LinJ29_V3.1350 | <i>L. infantum</i> | 76  | 169  | 244  |
| LinJ29_V3.1350 | <i>L. infantum</i> | 43  | 316  | 358  |
| LinJ29_V3.1350 | <i>L. infantum</i> | 40  | 424  | 463  |
| LinJ29_V3.1350 | <i>L. infantum</i> | 58  | 607  | 664  |
| LinJ29_V3.1350 | <i>L. infantum</i> | 254 | 870  | 1123 |
| LinJ29_V3.1350 | <i>L. infantum</i> | 135 | 1220 | 1354 |
| LinJ29_V3.1350 | <i>L. infantum</i> | 52  | 1467 | 1518 |
| LinJ29_V3.1360 | <i>L. infantum</i> | 98  | 406  | 503  |
| LinJ29_V3.1370 | <i>L. infantum</i> | 139 | 1    | 139  |
| LinJ29_V3.1370 | <i>L. infantum</i> | 103 | 168  | 270  |
| LinJ29_V3.1370 | <i>L. infantum</i> | 145 | 837  | 981  |
| LinJ29_V3.1370 | <i>L. infantum</i> | 350 | 1008 | 1357 |
| LinJ29_V3.1370 | <i>L. infantum</i> | 153 | 1423 | 1575 |
| LinJ29_V3.1380 | <i>L. infantum</i> | 61  | 38   | 98   |
| LinJ29_V3.1410 | <i>L. infantum</i> | 53  | 1    | 53   |
| LinJ29_V3.1410 | <i>L. infantum</i> | 68  | 189  | 256  |
| LinJ29_V3.1410 | <i>L. infantum</i> | 104 | 304  | 407  |
| LinJ29_V3.1420 | <i>L. infantum</i> | 267 | 1    | 267  |
| LinJ29_V3.1420 | <i>L. infantum</i> | 44  | 416  | 459  |
| LinJ29_V3.1440 | <i>L. infantum</i> | 65  | 1    | 65   |
| LinJ29_V3.1440 | <i>L. infantum</i> | 134 | 254  | 387  |
| LinJ29_V3.1440 | <i>L. infantum</i> | 208 | 402  | 609  |
| LinJ29_V3.1460 | <i>L. infantum</i> | 218 | 1    | 218  |
| LinJ29_V3.1460 | <i>L. infantum</i> | 499 | 422  | 920  |
| LinJ29_V3.1470 | <i>L. infantum</i> | 144 | 1    | 144  |
| LinJ29_V3.1470 | <i>L. infantum</i> | 327 | 322  | 648  |
| LinJ29_V3.1480 | <i>L. infantum</i> | 240 | 1    | 240  |

|                |                    |     |      |      |
|----------------|--------------------|-----|------|------|
| LinJ29_V3.1480 | <i>L. infantum</i> | 48  | 289  | 336  |
| LinJ29_V3.1480 | <i>L. infantum</i> | 62  | 353  | 414  |
| LinJ29_V3.1480 | <i>L. infantum</i> | 64  | 451  | 514  |
| LinJ29_V3.1480 | <i>L. infantum</i> | 176 | 522  | 697  |
| LinJ29_V3.1480 | <i>L. infantum</i> | 416 | 716  | 1131 |
| LinJ29_V3.1480 | <i>L. infantum</i> | 91  | 1159 | 1249 |
| LinJ29_V3.1490 | <i>L. infantum</i> | 310 | 11   | 320  |
| LinJ29_V3.1490 | <i>L. infantum</i> | 67  | 391  | 457  |
| LinJ29_V3.1490 | <i>L. infantum</i> | 181 | 464  | 644  |
| LinJ29_V3.1500 | <i>L. infantum</i> | 67  | 1    | 67   |
| LinJ29_V3.1500 | <i>L. infantum</i> | 52  | 226  | 277  |
| LinJ29_V3.1500 | <i>L. infantum</i> | 227 | 342  | 568  |
| LinJ29_V3.1500 | <i>L. infantum</i> | 65  | 580  | 644  |
| LinJ29_V3.1500 | <i>L. infantum</i> | 68  | 716  | 783  |
| LinJ29_V3.1510 | <i>L. infantum</i> | 192 | 51   | 242  |
| LinJ29_V3.1520 | <i>L. infantum</i> | 833 | 1    | 833  |
| LinJ29_V3.1520 | <i>L. infantum</i> | 291 | 879  | 1169 |
| LinJ29_V3.1540 | <i>L. infantum</i> | 75  | 39   | 113  |
| LinJ29_V3.1540 | <i>L. infantum</i> | 55  | 322  | 376  |
| LinJ29_V3.1540 | <i>L. infantum</i> | 55  | 322  | 376  |
| LinJ29_V3.1550 | <i>L. infantum</i> | 80  | 29   | 108  |
| LinJ29_V3.1550 | <i>L. infantum</i> | 63  | 288  | 350  |
| LinJ29_V3.1550 | <i>L. infantum</i> | 65  | 587  | 651  |
| LinJ29_V3.1550 | <i>L. infantum</i> | 71  | 676  | 746  |
| LinJ29_V3.1550 | <i>L. infantum</i> | 57  | 861  | 917  |
| LinJ29_V3.1560 | <i>L. infantum</i> | 120 | 130  | 249  |
| LinJ29_V3.1560 | <i>L. infantum</i> | 67  | 293  | 359  |
| LinJ29_V3.1560 | <i>L. infantum</i> | 93  | 444  | 536  |
| LinJ29_V3.1560 | <i>L. infantum</i> | 48  | 933  | 980  |
| LinJ29_V3.1560 | <i>L. infantum</i> | 53  | 989  | 1041 |
| LinJ29_V3.1570 | <i>L. infantum</i> | 159 | 1    | 159  |
| LinJ29_V3.1570 | <i>L. infantum</i> | 82  | 259  | 340  |
| LinJ29_V3.1580 | <i>L. infantum</i> | 100 | 75   | 174  |
| LinJ29_V3.1590 | <i>L. infantum</i> | 49  | 1    | 49   |
| LinJ29_V3.1590 | <i>L. infantum</i> | 42  | 75   | 116  |
| LinJ29_V3.1590 | <i>L. infantum</i> | 67  | 196  | 262  |
| LinJ29_V3.1590 | <i>L. infantum</i> | 46  | 321  | 366  |
| LinJ29_V3.1590 | <i>L. infantum</i> | 99  | 548  | 646  |
| LinJ29_V3.1590 | <i>L. infantum</i> | 109 | 977  | 1085 |
| LinJ29_V3.1590 | <i>L. infantum</i> | 44  | 1166 | 1209 |
| LinJ29_V3.1590 | <i>L. infantum</i> | 44  | 1307 | 1350 |
| LinJ29_V3.1600 | <i>L. infantum</i> | 119 | 310  | 428  |
| LinJ29_V3.1610 | <i>L. infantum</i> | 99  | 290  | 388  |
| LinJ29_V3.1620 | <i>L. infantum</i> | 99  | 290  | 388  |
| LinJ29_V3.1630 | <i>L. infantum</i> | 99  | 220  | 318  |
| LinJ29_V3.1640 | <i>L. infantum</i> | 40  | 74   | 113  |
| LinJ29_V3.1640 | <i>L. infantum</i> | 54  | 175  | 228  |

|                |                    |     |      |      |
|----------------|--------------------|-----|------|------|
| LinJ29_V3.1640 | <i>L. infantum</i> | 52  | 355  | 406  |
| LinJ29_V3.1640 | <i>L. infantum</i> | 48  | 624  | 671  |
| LinJ29_V3.1660 | <i>L. infantum</i> | 126 | 58   | 183  |
| LinJ29_V3.1660 | <i>L. infantum</i> | 91  | 673  | 763  |
| LinJ29_V3.1670 | <i>L. infantum</i> | 158 | 37   | 194  |
| LinJ29_V3.1670 | <i>L. infantum</i> | 52  | 478  | 529  |
| LinJ29_V3.1670 | <i>L. infantum</i> | 52  | 478  | 529  |
| LinJ29_V3.1690 | <i>L. infantum</i> | 66  | 125  | 190  |
| LinJ29_V3.1690 | <i>L. infantum</i> | 95  | 274  | 368  |
| LinJ29_V3.1690 | <i>L. infantum</i> | 59  | 394  | 452  |
| LinJ29_V3.1700 | <i>L. infantum</i> | 43  | 60   | 102  |
| LinJ29_V3.1700 | <i>L. infantum</i> | 86  | 107  | 192  |
| LinJ29_V3.1700 | <i>L. infantum</i> | 127 | 236  | 362  |
| LinJ29_V3.1720 | <i>L. infantum</i> | 46  | 1    | 46   |
| LinJ29_V3.1720 | <i>L. infantum</i> | 319 | 61   | 379  |
| LinJ29_V3.1720 | <i>L. infantum</i> | 559 | 454  | 1012 |
| LinJ29_V3.1750 | <i>L. infantum</i> | 40  | 46   | 85   |
| LinJ29_V3.1750 | <i>L. infantum</i> | 73  | 304  | 376  |
| LinJ29_V3.1760 | <i>L. infantum</i> | 157 | 186  | 342  |
| LinJ29_V3.1760 | <i>L. infantum</i> | 79  | 431  | 509  |
| LinJ29_V3.1760 | <i>L. infantum</i> | 63  | 683  | 745  |
| LinJ29_V3.1760 | <i>L. infantum</i> | 133 | 925  | 1057 |
| LinJ29_V3.1760 | <i>L. infantum</i> | 63  | 1101 | 1163 |
| LinJ29_V3.1760 | <i>L. infantum</i> | 73  | 1206 | 1278 |
| LinJ29_V3.1760 | <i>L. infantum</i> | 41  | 1398 | 1438 |
| LinJ29_V3.1760 | <i>L. infantum</i> | 82  | 1466 | 1547 |
| LinJ29_V3.1760 | <i>L. infantum</i> | 70  | 1829 | 1898 |
| LinJ29_V3.1760 | <i>L. infantum</i> | 83  | 2005 | 2087 |
| LinJ29_V3.1760 | <i>L. infantum</i> | 65  | 2205 | 2269 |
| LinJ29_V3.1760 | <i>L. infantum</i> | 56  | 2337 | 2392 |
| LinJ29_V3.1770 | <i>L. infantum</i> | 72  | 1    | 72   |
| LinJ29_V3.1770 | <i>L. infantum</i> | 141 | 274  | 414  |
| LinJ29_V3.1770 | <i>L. infantum</i> | 61  | 1157 | 1217 |
| LinJ29_V3.1780 | <i>L. infantum</i> | 57  | 1    | 57   |
| LinJ29_V3.1780 | <i>L. infantum</i> | 109 | 355  | 463  |
| LinJ29_V3.1780 | <i>L. infantum</i> | 109 | 355  | 463  |
| LinJ29_V3.1800 | <i>L. infantum</i> | 54  | 1    | 54   |
| LinJ29_V3.1800 | <i>L. infantum</i> | 50  | 134  | 183  |
| LinJ29_V3.1810 | <i>L. infantum</i> | 113 | 34   | 146  |
| LinJ29_V3.1820 | <i>L. infantum</i> | 41  | 151  | 191  |
| LinJ29_V3.1830 | <i>L. infantum</i> | 43  | 1    | 43   |
| LinJ29_V3.1830 | <i>L. infantum</i> | 91  | 578  | 668  |
| LinJ29_V3.1830 | <i>L. infantum</i> | 211 | 841  | 1051 |
| LinJ29_V3.1830 | <i>L. infantum</i> | 165 | 1067 | 1231 |
| LinJ29_V3.1840 | <i>L. infantum</i> | 51  | 1    | 51   |
| LinJ29_V3.1840 | <i>L. infantum</i> | 68  | 531  | 598  |
| LinJ29_V3.1840 | <i>L. infantum</i> | 62  | 918  | 979  |

|                |                    |     |      |      |
|----------------|--------------------|-----|------|------|
| LinJ29_V3.1840 | <i>L. infantum</i> | 47  | 1012 | 1058 |
| LinJ29_V3.1850 | <i>L. infantum</i> | 221 | 20   | 240  |
| LinJ29_V3.1860 | <i>L. infantum</i> | 147 | 1    | 147  |
| LinJ29_V3.1870 | <i>L. infantum</i> | 161 | 33   | 193  |
| LinJ29_V3.1890 | <i>L. infantum</i> | 81  | 136  | 216  |
| LinJ29_V3.1890 | <i>L. infantum</i> | 122 | 239  | 360  |
| LinJ29_V3.1890 | <i>L. infantum</i> | 123 | 473  | 595  |
| LinJ29_V3.1910 | <i>L. infantum</i> | 174 | 183  | 356  |
| LinJ29_V3.1910 | <i>L. infantum</i> | 186 | 575  | 760  |
| LinJ29_V3.1910 | <i>L. infantum</i> | 67  | 805  | 871  |
| LinJ29_V3.1930 | <i>L. infantum</i> | 53  | 154  | 206  |
| LinJ29_V3.1930 | <i>L. infantum</i> | 43  | 423  | 465  |
| LinJ29_V3.1930 | <i>L. infantum</i> | 95  | 499  | 593  |
| LinJ29_V3.1960 | <i>L. infantum</i> | 52  | 1    | 52   |
| LinJ29_V3.1960 | <i>L. infantum</i> | 223 | 62   | 284  |
| LinJ29_V3.1960 | <i>L. infantum</i> | 223 | 62   | 284  |
| LinJ29_V3.1970 | <i>L. infantum</i> | 168 | 1    | 168  |
| LinJ29_V3.1980 | <i>L. infantum</i> | 98  | 238  | 335  |
| LinJ29_V3.1990 | <i>L. infantum</i> | 44  | 65   | 108  |
| LinJ29_V3.2000 | <i>L. infantum</i> | 70  | 40   | 109  |
| LinJ29_V3.2000 | <i>L. infantum</i> | 54  | 362  | 415  |
| LinJ29_V3.2000 | <i>L. infantum</i> | 52  | 612  | 663  |
| LinJ29_V3.2000 | <i>L. infantum</i> | 90  | 757  | 846  |
| LinJ29_V3.2000 | <i>L. infantum</i> | 48  | 968  | 1015 |
| LinJ29_V3.2010 | <i>L. infantum</i> | 105 | 66   | 170  |
| LinJ29_V3.2010 | <i>L. infantum</i> | 153 | 244  | 396  |
| LinJ29_V3.2020 | <i>L. infantum</i> | 45  | 219  | 263  |
| LinJ29_V3.2020 | <i>L. infantum</i> | 74  | 294  | 367  |
| LinJ29_V3.2030 | <i>L. infantum</i> | 58  | 90   | 147  |
| LinJ29_V3.2030 | <i>L. infantum</i> | 74  | 289  | 362  |
| LinJ29_V3.2040 | <i>L. infantum</i> | 61  | 48   | 108  |
| LinJ29_V3.2050 | <i>L. infantum</i> | 65  | 1    | 65   |
| LinJ29_V3.2050 | <i>L. infantum</i> | 124 | 142  | 265  |
| LinJ29_V3.2060 | <i>L. infantum</i> | 91  | 22   | 112  |
| LinJ29_V3.2070 | <i>L. infantum</i> | 44  | 1    | 44   |
| LinJ29_V3.2090 | <i>L. infantum</i> | 55  | 173  | 227  |
| LinJ29_V3.2100 | <i>L. infantum</i> | 40  | 1    | 40   |
| LinJ29_V3.2100 | <i>L. infantum</i> | 291 | 168  | 458  |
| LinJ29_V3.2100 | <i>L. infantum</i> | 364 | 598  | 961  |
| LinJ29_V3.2100 | <i>L. infantum</i> | 56  | 1002 | 1057 |
| LinJ29_V3.2100 | <i>L. infantum</i> | 90  | 1158 | 1247 |
| LinJ29_V3.2100 | <i>L. infantum</i> | 82  | 1391 | 1472 |
| LinJ29_V3.2100 | <i>L. infantum</i> | 66  | 1567 | 1632 |
| LinJ29_V3.2100 | <i>L. infantum</i> | 77  | 1761 | 1837 |
| LinJ29_V3.2110 | <i>L. infantum</i> | 87  | 92   | 178  |
| LinJ29_V3.2110 | <i>L. infantum</i> | 43  | 329  | 371  |
| LinJ29_V3.2110 | <i>L. infantum</i> | 46  | 403  | 448  |

|                |                    |     |      |      |
|----------------|--------------------|-----|------|------|
| LinJ29_V3.2130 | <i>L. infantum</i> | 43  | 1    | 43   |
| LinJ29_V3.2130 | <i>L. infantum</i> | 107 | 489  | 595  |
| LinJ29_V3.2130 | <i>L. infantum</i> | 107 | 489  | 595  |
| LinJ29_V3.2140 | <i>L. infantum</i> | 98  | 435  | 532  |
| LinJ29_V3.2140 | <i>L. infantum</i> | 167 | 600  | 766  |
| LinJ29_V3.2150 | <i>L. infantum</i> | 148 | 230  | 377  |
| LinJ29_V3.2160 | <i>L. infantum</i> | 221 | 1    | 221  |
| LinJ29_V3.2160 | <i>L. infantum</i> | 87  | 236  | 322  |
| LinJ29_V3.2160 | <i>L. infantum</i> | 46  | 447  | 492  |
| LinJ29_V3.2160 | <i>L. infantum</i> | 57  | 572  | 628  |
| LinJ29_V3.2160 | <i>L. infantum</i> | 49  | 679  | 727  |
| LinJ29_V3.2160 | <i>L. infantum</i> | 55  | 768  | 822  |
| LinJ29_V3.2160 | <i>L. infantum</i> | 109 | 869  | 977  |
| LinJ29_V3.2160 | <i>L. infantum</i> | 307 | 981  | 1287 |
| LinJ29_V3.2170 | <i>L. infantum</i> | 284 | 1    | 284  |
| LinJ29_V3.2170 | <i>L. infantum</i> | 75  | 320  | 394  |
| LinJ29_V3.2170 | <i>L. infantum</i> | 69  | 424  | 492  |
| LinJ29_V3.2170 | <i>L. infantum</i> | 154 | 555  | 708  |
| LinJ29_V3.2190 | <i>L. infantum</i> | 130 | 1    | 130  |
| LinJ29_V3.2190 | <i>L. infantum</i> | 63  | 174  | 236  |
| LinJ29_V3.2190 | <i>L. infantum</i> | 150 | 260  | 409  |
| LinJ29_V3.2210 | <i>L. infantum</i> | 101 | 94   | 194  |
| LinJ29_V3.2210 | <i>L. infantum</i> | 62  | 351  | 412  |
| LinJ29_V3.2210 | <i>L. infantum</i> | 110 | 449  | 558  |
| LinJ29_V3.2210 | <i>L. infantum</i> | 84  | 1073 | 1156 |
| LinJ29_V3.2210 | <i>L. infantum</i> | 78  | 1525 | 1602 |
| LinJ29_V3.2220 | <i>L. infantum</i> | 54  | 105  | 158  |
| LinJ29_V3.2220 | <i>L. infantum</i> | 56  | 201  | 256  |
| LinJ29_V3.2220 | <i>L. infantum</i> | 54  | 352  | 405  |
| LinJ29_V3.2230 | <i>L. infantum</i> | 50  | 123  | 172  |
| LinJ29_V3.2260 | <i>L. infantum</i> | 221 | 1    | 221  |
| LinJ29_V3.2280 | <i>L. infantum</i> | 87  | 47   | 133  |
| LinJ29_V3.2280 | <i>L. infantum</i> | 90  | 285  | 374  |
| LinJ29_V3.2280 | <i>L. infantum</i> | 44  | 475  | 518  |
| LinJ29_V3.2280 | <i>L. infantum</i> | 70  | 545  | 614  |
| LinJ29_V3.2290 | <i>L. infantum</i> | 245 | 1    | 245  |
| LinJ29_V3.2300 | <i>L. infantum</i> | 49  | 123  | 171  |
| LinJ29_V3.2310 | <i>L. infantum</i> | 93  | 500  | 592  |
| LinJ29_V3.2310 | <i>L. infantum</i> | 53  | 648  | 700  |
| LinJ29_V3.2320 | <i>L. infantum</i> | 116 | 159  | 274  |
| LinJ29_V3.2320 | <i>L. infantum</i> | 162 | 327  | 488  |
| LinJ29_V3.2330 | <i>L. infantum</i> | 161 | 205  | 365  |
| LinJ29_V3.2340 | <i>L. infantum</i> | 49  | 85   | 133  |
| LinJ29_V3.2340 | <i>L. infantum</i> | 94  | 239  | 332  |
| LinJ29_V3.2340 | <i>L. infantum</i> | 94  | 239  | 332  |
| LinJ29_V3.2360 | <i>L. infantum</i> | 189 | 1    | 189  |
| LinJ29_V3.2360 | <i>L. infantum</i> | 61  | 549  | 609  |



|                |                    |     |     |     |
|----------------|--------------------|-----|-----|-----|
| LinJ29_V3.2360 | <i>L. infantum</i> | 61  | 549 | 609 |
| LinJ29_V3.2370 | <i>L. infantum</i> | 75  | 1   | 75  |
| LinJ29_V3.2370 | <i>L. infantum</i> | 45  | 177 | 221 |
| LinJ29_V3.2370 | <i>L. infantum</i> | 45  | 177 | 221 |
| LinJ29_V3.2380 | <i>L. infantum</i> | 61  | 264 | 324 |
| LinJ29_V3.2400 | <i>L. infantum</i> | 412 | 1   | 412 |
| LinJ29_V3.2410 | <i>L. infantum</i> | 50  | 460 | 509 |
| LinJ29_V3.2440 | <i>L. infantum</i> | 43  | 172 | 214 |
| LinJ29_V3.2440 | <i>L. infantum</i> | 86  | 283 | 368 |
| LinJ29_V3.2440 | <i>L. infantum</i> | 86  | 283 | 368 |
| LinJ29_V3.2490 | <i>L. infantum</i> | 45  | 1   | 45  |
| LinJ29_V3.2490 | <i>L. infantum</i> | 88  | 151 | 238 |
| LinJ29_V3.2490 | <i>L. infantum</i> | 63  | 246 | 308 |
| LinJ29_V3.2500 | <i>L. infantum</i> | 43  | 1   | 43  |
| LinJ29_V3.2500 | <i>L. infantum</i> | 88  | 149 | 236 |
| LinJ29_V3.2500 | <i>L. infantum</i> | 63  | 244 | 306 |
| LinJ29_V3.2500 | <i>L. infantum</i> | 62  | 349 | 410 |
| LinJ29_V3.2510 | <i>L. infantum</i> | 46  | 1   | 46  |
| LinJ29_V3.2510 | <i>L. infantum</i> | 137 | 70  | 206 |
| LinJ29_V3.2540 | <i>L. infantum</i> | 747 | 1   | 747 |
| LinJ29_V3.2550 | <i>L. infantum</i> | 88  | 1   | 88  |
| LinJ29_V3.2550 | <i>L. infantum</i> | 47  | 273 | 319 |
| LinJ29_V3.2550 | <i>L. infantum</i> | 47  | 273 | 319 |
| LinJ29_V3.2570 | <i>L. infantum</i> | 84  | 1   | 84  |
| LinJ29_V3.2580 | <i>L. infantum</i> | 84  | 1   | 84  |
| LinJ29_V3.2590 | <i>L. infantum</i> | 846 | 1   | 846 |
| LinJ29_V3.2600 | <i>L. infantum</i> | 59  | 113 | 171 |
| LinJ29_V3.2610 | <i>L. infantum</i> | 58  | 64  | 121 |
| LinJ29_V3.2610 | <i>L. infantum</i> | 66  | 367 | 432 |
| LinJ29_V3.2610 | <i>L. infantum</i> | 66  | 367 | 432 |
| LinJ29_V3.2630 | <i>L. infantum</i> | 98  | 305 | 402 |
| LinJ29_V3.2660 | <i>L. infantum</i> | 65  | 770 | 834 |
| LinJ29_V3.2670 | <i>L. infantum</i> | 97  | 24  | 120 |
| LinJ29_V3.2670 | <i>L. infantum</i> | 145 | 136 | 280 |
| LinJ29_V3.2670 | <i>L. infantum</i> | 55  | 353 | 407 |
| LinJ29_V3.2680 | <i>L. infantum</i> | 174 | 274 | 447 |
| LinJ29_V3.2690 | <i>L. infantum</i> | 50  | 1   | 50  |
| LinJ29_V3.2690 | <i>L. infantum</i> | 113 | 71  | 183 |
| LinJ29_V3.2690 | <i>L. infantum</i> | 84  | 202 | 285 |
| LinJ29_V3.2690 | <i>L. infantum</i> | 286 | 294 | 579 |
| LinJ29_V3.2700 | <i>L. infantum</i> | 56  | 1   | 56  |
| LinJ29_V3.2700 | <i>L. infantum</i> | 174 | 140 | 313 |
| LinJ29_V3.2700 | <i>L. infantum</i> | 62  | 323 | 384 |
| LinJ29_V3.2700 | <i>L. infantum</i> | 79  | 512 | 590 |
| LinJ29_V3.2720 | <i>L. infantum</i> | 233 | 1   | 233 |
| LinJ29_V3.2720 | <i>L. infantum</i> | 68  | 240 | 307 |
| LinJ29_V3.2720 | <i>L. infantum</i> | 62  | 366 | 427 |

|                |                    |     |      |      |
|----------------|--------------------|-----|------|------|
| LinJ29_V3.2720 | <i>L. infantum</i> | 72  | 648  | 719  |
| LinJ29_V3.2740 | <i>L. infantum</i> | 63  | 113  | 175  |
| LinJ29_V3.2740 | <i>L. infantum</i> | 56  | 190  | 245  |
| LinJ29_V3.2740 | <i>L. infantum</i> | 55  | 316  | 370  |
| LinJ29_V3.2740 | <i>L. infantum</i> | 62  | 495  | 556  |
| LinJ29_V3.2740 | <i>L. infantum</i> | 144 | 773  | 916  |
| LinJ29_V3.2740 | <i>L. infantum</i> | 210 | 1028 | 1237 |
| LinJ29_V3.2760 | <i>L. infantum</i> | 78  | 464  | 541  |
| LinJ29_V3.2760 | <i>L. infantum</i> | 67  | 824  | 890  |
| LinJ29_V3.2760 | <i>L. infantum</i> | 42  | 946  | 987  |
| LinJ29_V3.2770 | <i>L. infantum</i> | 60  | 128  | 187  |
| LinJ29_V3.2770 | <i>L. infantum</i> | 118 | 747  | 864  |
| LinJ29_V3.2780 | <i>L. infantum</i> | 72  | 252  | 323  |
| LinJ29_V3.2780 | <i>L. infantum</i> | 85  | 346  | 430  |
| LinJ29_V3.2790 | <i>L. infantum</i> | 82  | 51   | 132  |
| LinJ29_V3.2790 | <i>L. infantum</i> | 307 | 149  | 455  |
| LinJ29_V3.2790 | <i>L. infantum</i> | 226 | 856  | 1081 |
| LinJ29_V3.2800 | <i>L. infantum</i> | 308 | 1    | 308  |
| LinJ29_V3.2810 | <i>L. infantum</i> | 40  | 745  | 784  |
| LinJ29_V3.2830 | <i>L. infantum</i> | 43  | 1    | 43   |
| LinJ29_V3.2840 | <i>L. infantum</i> | 55  | 242  | 296  |
| LinJ29_V3.2850 | <i>L. infantum</i> | 44  | 182  | 225  |
| LinJ29_V3.2870 | <i>L. infantum</i> | 41  | 1    | 41   |
| LinJ29_V3.2920 | <i>L. infantum</i> | 183 | 554  | 736  |
| LinJ29_V3.2940 | <i>L. infantum</i> | 109 | 1    | 109  |
| LinJ29_V3.2960 | <i>L. infantum</i> | 49  | 41   | 89   |
| LinJ29_V3.3030 | <i>L. infantum</i> | 44  | 1    | 44   |
| LinJ30_V3.0050 | <i>L. infantum</i> | 144 | 94   | 237  |
| LinJ30_V3.0050 | <i>L. infantum</i> | 217 | 546  | 762  |
| LinJ30_V3.0060 | <i>L. infantum</i> | 43  | 142  | 184  |
| LinJ30_V3.0080 | <i>L. infantum</i> | 55  | 1    | 55   |
| LinJ30_V3.0090 | <i>L. infantum</i> | 221 | 1    | 221  |
| LinJ30_V3.0120 | <i>L. infantum</i> | 47  | 575  | 621  |
| LinJ30_V3.0140 | <i>L. infantum</i> | 108 | 1    | 108  |
| LinJ30_V3.0190 | <i>L. infantum</i> | 60  | 139  | 198  |
| LinJ30_V3.0190 | <i>L. infantum</i> | 44  | 381  | 424  |
| LinJ30_V3.0190 | <i>L. infantum</i> | 44  | 381  | 424  |
| LinJ30_V3.0210 | <i>L. infantum</i> | 66  | 1    | 66   |
| LinJ30_V3.0220 | <i>L. infantum</i> | 171 | 216  | 386  |
| LinJ30_V3.0240 | <i>L. infantum</i> | 40  | 357  | 396  |
| LinJ30_V3.0240 | <i>L. infantum</i> | 43  | 504  | 546  |
| LinJ30_V3.0240 | <i>L. infantum</i> | 43  | 504  | 546  |
| LinJ30_V3.0250 | <i>L. infantum</i> | 59  | 406  | 464  |
| LinJ30_V3.0250 | <i>L. infantum</i> | 79  | 1054 | 1132 |
| LinJ30_V3.0260 | <i>L. infantum</i> | 45  | 152  | 196  |
| LinJ30_V3.0260 | <i>L. infantum</i> | 89  | 314  | 402  |
| LinJ30_V3.0260 | <i>L. infantum</i> | 62  | 580  | 641  |

|                |                    |     |      |      |
|----------------|--------------------|-----|------|------|
| LinJ30_V3.0270 | <i>L. infantum</i> | 92  | 303  | 394  |
| LinJ30_V3.0280 | <i>L. infantum</i> | 91  | 1    | 91   |
| LinJ30_V3.0290 | <i>L. infantum</i> | 145 | 476  | 620  |
| LinJ30_V3.0290 | <i>L. infantum</i> | 90  | 820  | 909  |
| LinJ30_V3.0290 | <i>L. infantum</i> | 72  | 1107 | 1178 |
| LinJ30_V3.0300 | <i>L. infantum</i> | 58  | 23   | 80   |
| LinJ30_V3.0310 | <i>L. infantum</i> | 40  | 165  | 204  |
| LinJ30_V3.0310 | <i>L. infantum</i> | 67  | 250  | 316  |
| LinJ30_V3.0310 | <i>L. infantum</i> | 300 | 383  | 682  |
| LinJ30_V3.0310 | <i>L. infantum</i> | 504 | 892  | 1395 |
| LinJ30_V3.0320 | <i>L. infantum</i> | 62  | 214  | 275  |
| LinJ30_V3.0320 | <i>L. infantum</i> | 60  | 292  | 351  |
| LinJ30_V3.0320 | <i>L. infantum</i> | 75  | 379  | 453  |
| LinJ30_V3.0320 | <i>L. infantum</i> | 55  | 465  | 519  |
| LinJ30_V3.0330 | <i>L. infantum</i> | 116 | 244  | 359  |
| LinJ30_V3.0330 | <i>L. infantum</i> | 233 | 848  | 1080 |
| LinJ30_V3.0340 | <i>L. infantum</i> | 70  | 572  | 641  |
| LinJ30_V3.0350 | <i>L. infantum</i> | 51  | 378  | 428  |
| LinJ30_V3.0350 | <i>L. infantum</i> | 100 | 486  | 585  |
| LinJ30_V3.0350 | <i>L. infantum</i> | 100 | 486  | 585  |
| LinJ30_V3.0370 | <i>L. infantum</i> | 68  | 260  | 327  |
| LinJ30_V3.0380 | <i>L. infantum</i> | 41  | 344  | 384  |
| LinJ30_V3.0390 | <i>L. infantum</i> | 52  | 35   | 86   |
| LinJ30_V3.0390 | <i>L. infantum</i> | 124 | 127  | 250  |
| LinJ30_V3.0400 | <i>L. infantum</i> | 178 | 319  | 496  |
| LinJ30_V3.0420 | <i>L. infantum</i> | 67  | 1    | 67   |
| LinJ30_V3.0430 | <i>L. infantum</i> | 44  | 314  | 357  |
| LinJ30_V3.0450 | <i>L. infantum</i> | 42  | 1    | 42   |
| LinJ30_V3.0460 | <i>L. infantum</i> | 97  | 1    | 97   |
| LinJ30_V3.0470 | <i>L. infantum</i> | 48  | 1    | 48   |
| LinJ30_V3.0470 | <i>L. infantum</i> | 47  | 146  | 192  |
| LinJ30_V3.0470 | <i>L. infantum</i> | 47  | 146  | 192  |
| LinJ30_V3.0480 | <i>L. infantum</i> | 70  | 284  | 353  |
| LinJ30_V3.0490 | <i>L. infantum</i> | 53  | 1    | 53   |
| LinJ30_V3.0490 | <i>L. infantum</i> | 151 | 59   | 209  |
| LinJ30_V3.0500 | <i>L. infantum</i> | 353 | 1    | 353  |
| LinJ30_V3.0500 | <i>L. infantum</i> | 110 | 360  | 469  |
| LinJ30_V3.0500 | <i>L. infantum</i> | 217 | 500  | 716  |
| LinJ30_V3.0520 | <i>L. infantum</i> | 455 | 7    | 461  |
| LinJ30_V3.0530 | <i>L. infantum</i> | 117 | 103  | 219  |
| LinJ30_V3.0530 | <i>L. infantum</i> | 97  | 466  | 562  |
| LinJ30_V3.0530 | <i>L. infantum</i> | 87  | 603  | 689  |
| LinJ30_V3.0530 | <i>L. infantum</i> | 86  | 695  | 780  |
| LinJ30_V3.0530 | <i>L. infantum</i> | 74  | 823  | 896  |
| LinJ30_V3.0530 | <i>L. infantum</i> | 133 | 944  | 1076 |
| LinJ30_V3.0530 | <i>L. infantum</i> | 43  | 1106 | 1148 |
| LinJ30_V3.0540 | <i>L. infantum</i> | 62  | 267  | 328  |

|                |                    |     |      |      |
|----------------|--------------------|-----|------|------|
| LinJ30_V3.0540 | <i>L. infantum</i> | 48  | 569  | 616  |
| LinJ30_V3.0540 | <i>L. infantum</i> | 54  | 690  | 743  |
| LinJ30_V3.0570 | <i>L. infantum</i> | 78  | 532  | 609  |
| LinJ30_V3.0580 | <i>L. infantum</i> | 272 | 54   | 325  |
| LinJ30_V3.0590 | <i>L. infantum</i> | 137 | 1    | 137  |
| LinJ30_V3.0590 | <i>L. infantum</i> | 127 | 348  | 474  |
| LinJ30_V3.0610 | <i>L. infantum</i> | 59  | 36   | 94   |
| LinJ30_V3.0610 | <i>L. infantum</i> | 52  | 404  | 455  |
| LinJ30_V3.0610 | <i>L. infantum</i> | 52  | 404  | 455  |
| LinJ30_V3.0620 | <i>L. infantum</i> | 156 | 51   | 206  |
| LinJ30_V3.0620 | <i>L. infantum</i> | 141 | 212  | 352  |
| LinJ30_V3.0620 | <i>L. infantum</i> | 313 | 616  | 928  |
| LinJ30_V3.0630 | <i>L. infantum</i> | 81  | 1    | 81   |
| LinJ30_V3.0640 | <i>L. infantum</i> | 41  | 47   | 87   |
| LinJ30_V3.0640 | <i>L. infantum</i> | 103 | 114  | 216  |
| LinJ30_V3.0650 | <i>L. infantum</i> | 66  | 1    | 66   |
| LinJ30_V3.0660 | <i>L. infantum</i> | 58  | 103  | 160  |
| LinJ30_V3.0680 | <i>L. infantum</i> | 73  | 1    | 73   |
| LinJ30_V3.0740 | <i>L. infantum</i> | 59  | 488  | 546  |
| LinJ30_V3.0750 | <i>L. infantum</i> | 54  | 1    | 54   |
| LinJ30_V3.0760 | <i>L. infantum</i> | 96  | 1    | 96   |
| LinJ30_V3.0770 | <i>L. infantum</i> | 41  | 48   | 88   |
| LinJ30_V3.0790 | <i>L. infantum</i> | 113 | 46   | 158  |
| LinJ30_V3.0810 | <i>L. infantum</i> | 202 | 802  | 1003 |
| LinJ30_V3.0810 | <i>L. infantum</i> | 50  | 1009 | 1058 |
| LinJ30_V3.0830 | <i>L. infantum</i> | 163 | 25   | 187  |
| LinJ30_V3.0830 | <i>L. infantum</i> | 71  | 260  | 330  |
| LinJ30_V3.0840 | <i>L. infantum</i> | 177 | 165  | 341  |
| LinJ30_V3.0850 | <i>L. infantum</i> | 40  | 64   | 103  |
| LinJ30_V3.0850 | <i>L. infantum</i> | 104 | 407  | 510  |
| LinJ30_V3.0860 | <i>L. infantum</i> | 64  | 86   | 149  |
| LinJ30_V3.0890 | <i>L. infantum</i> | 131 | 74   | 204  |
| LinJ30_V3.0890 | <i>L. infantum</i> | 43  | 217  | 259  |
| LinJ30_V3.0890 | <i>L. infantum</i> | 85  | 443  | 527  |
| LinJ30_V3.0890 | <i>L. infantum</i> | 178 | 589  | 766  |
| LinJ30_V3.0900 | <i>L. infantum</i> | 49  | 1    | 49   |
| LinJ30_V3.0900 | <i>L. infantum</i> | 57  | 90   | 146  |
| LinJ30_V3.0900 | <i>L. infantum</i> | 57  | 90   | 146  |
| LinJ30_V3.0910 | <i>L. infantum</i> | 139 | 1    | 139  |
| LinJ30_V3.0910 | <i>L. infantum</i> | 75  | 844  | 918  |
| LinJ30_V3.0910 | <i>L. infantum</i> | 75  | 844  | 918  |
| LinJ30_V3.0960 | <i>L. infantum</i> | 225 | 1    | 225  |
| LinJ30_V3.0960 | <i>L. infantum</i> | 283 | 349  | 631  |
| LinJ30_V3.0970 | <i>L. infantum</i> | 66  | 1    | 66   |
| LinJ30_V3.0970 | <i>L. infantum</i> | 40  | 68   | 107  |
| LinJ30_V3.0970 | <i>L. infantum</i> | 68  | 617  | 684  |
| LinJ30_V3.0970 | <i>L. infantum</i> | 51  | 745  | 795  |

|                |                    |     |      |      |
|----------------|--------------------|-----|------|------|
| LinJ30_V3.0970 | <i>L. infantum</i> | 41  | 935  | 975  |
| LinJ30_V3.0980 | <i>L. infantum</i> | 61  | 29   | 89   |
| LinJ30_V3.0980 | <i>L. infantum</i> | 62  | 197  | 258  |
| LinJ30_V3.0980 | <i>L. infantum</i> | 54  | 344  | 397  |
| LinJ30_V3.0980 | <i>L. infantum</i> | 56  | 473  | 528  |
| LinJ30_V3.0980 | <i>L. infantum</i> | 56  | 548  | 603  |
| LinJ30_V3.0990 | <i>L. infantum</i> | 41  | 82   | 122  |
| LinJ30_V3.0990 | <i>L. infantum</i> | 41  | 282  | 322  |
| LinJ30_V3.0990 | <i>L. infantum</i> | 41  | 437  | 477  |
| LinJ30_V3.1000 | <i>L. infantum</i> | 64  | 1    | 64   |
| LinJ30_V3.1000 | <i>L. infantum</i> | 55  | 707  | 761  |
| LinJ30_V3.1010 | <i>L. infantum</i> | 210 | 1    | 210  |
| LinJ30_V3.1020 | <i>L. infantum</i> | 255 | 1    | 255  |
| LinJ30_V3.1020 | <i>L. infantum</i> | 108 | 273  | 380  |
| LinJ30_V3.1030 | <i>L. infantum</i> | 64  | 1    | 64   |
| LinJ30_V3.1040 | <i>L. infantum</i> | 42  | 167  | 208  |
| LinJ30_V3.1040 | <i>L. infantum</i> | 99  | 307  | 405  |
| LinJ30_V3.1040 | <i>L. infantum</i> | 99  | 307  | 405  |
| LinJ30_V3.1050 | <i>L. infantum</i> | 69  | 53   | 121  |
| LinJ30_V3.1050 | <i>L. infantum</i> | 78  | 196  | 273  |
| LinJ30_V3.1050 | <i>L. infantum</i> | 50  | 280  | 329  |
| LinJ30_V3.1050 | <i>L. infantum</i> | 65  | 381  | 445  |
| LinJ30_V3.1060 | <i>L. infantum</i> | 53  | 129  | 181  |
| LinJ30_V3.1060 | <i>L. infantum</i> | 63  | 244  | 306  |
| LinJ30_V3.1060 | <i>L. infantum</i> | 44  | 450  | 493  |
| LinJ30_V3.1060 | <i>L. infantum</i> | 63  | 529  | 591  |
| LinJ30_V3.1070 | <i>L. infantum</i> | 80  | 710  | 789  |
| LinJ30_V3.1080 | <i>L. infantum</i> | 72  | 1    | 72   |
| LinJ30_V3.1080 | <i>L. infantum</i> | 146 | 207  | 352  |
| LinJ30_V3.1090 | <i>L. infantum</i> | 185 | 1    | 185  |
| LinJ30_V3.1090 | <i>L. infantum</i> | 72  | 193  | 264  |
| LinJ30_V3.1130 | <i>L. infantum</i> | 144 | 1    | 144  |
| LinJ30_V3.1140 | <i>L. infantum</i> | 129 | 1    | 129  |
| LinJ30_V3.1140 | <i>L. infantum</i> | 51  | 271  | 321  |
| LinJ30_V3.1140 | <i>L. infantum</i> | 786 | 420  | 1205 |
| LinJ30_V3.1140 | <i>L. infantum</i> | 56  | 1265 | 1320 |
| LinJ30_V3.1140 | <i>L. infantum</i> | 459 | 1407 | 1865 |
| LinJ30_V3.1140 | <i>L. infantum</i> | 102 | 1903 | 2004 |
| LinJ30_V3.1140 | <i>L. infantum</i> | 259 | 2024 | 2282 |
| LinJ30_V3.1140 | <i>L. infantum</i> | 101 | 2285 | 2385 |
| LinJ30_V3.1150 | <i>L. infantum</i> | 90  | 156  | 245  |
| LinJ30_V3.1150 | <i>L. infantum</i> | 107 | 500  | 606  |
| LinJ30_V3.1150 | <i>L. infantum</i> | 237 | 640  | 876  |
| LinJ30_V3.1150 | <i>L. infantum</i> | 89  | 883  | 971  |
| LinJ30_V3.1170 | <i>L. infantum</i> | 79  | 78   | 156  |
| LinJ30_V3.1170 | <i>L. infantum</i> | 84  | 358  | 441  |
| LinJ30_V3.1170 | <i>L. infantum</i> | 44  | 576  | 619  |

|                |                    |     |      |      |
|----------------|--------------------|-----|------|------|
| LinJ30_V3.1180 | <i>L. infantum</i> | 75  | 1    | 75   |
| LinJ30_V3.1210 | <i>L. infantum</i> | 186 | 1    | 186  |
| LinJ30_V3.1210 | <i>L. infantum</i> | 78  | 325  | 402  |
| LinJ30_V3.1210 | <i>L. infantum</i> | 44  | 408  | 451  |
| LinJ30_V3.1210 | <i>L. infantum</i> | 96  | 475  | 570  |
| LinJ30_V3.1210 | <i>L. infantum</i> | 65  | 777  | 841  |
| LinJ30_V3.1220 | <i>L. infantum</i> | 289 | 1    | 289  |
| LinJ30_V3.1220 | <i>L. infantum</i> | 154 | 442  | 595  |
| LinJ30_V3.1220 | <i>L. infantum</i> | 44  | 750  | 793  |
| LinJ30_V3.1220 | <i>L. infantum</i> | 67  | 895  | 961  |
| LinJ30_V3.1220 | <i>L. infantum</i> | 160 | 1121 | 1280 |
| LinJ30_V3.1220 | <i>L. infantum</i> | 63  | 1472 | 1534 |
| LinJ30_V3.1220 | <i>L. infantum</i> | 56  | 1615 | 1670 |
| LinJ30_V3.1220 | <i>L. infantum</i> | 47  | 1704 | 1750 |
| LinJ30_V3.1230 | <i>L. infantum</i> | 186 | 1    | 186  |
| LinJ30_V3.1230 | <i>L. infantum</i> | 42  | 348  | 389  |
| LinJ30_V3.1230 | <i>L. infantum</i> | 42  | 641  | 682  |
| LinJ30_V3.1260 | <i>L. infantum</i> | 101 | 43   | 143  |
| LinJ30_V3.1260 | <i>L. infantum</i> | 97  | 249  | 345  |
| LinJ30_V3.1260 | <i>L. infantum</i> | 63  | 409  | 471  |
| LinJ30_V3.1260 | <i>L. infantum</i> | 105 | 818  | 922  |
| LinJ30_V3.1280 | <i>L. infantum</i> | 142 | 18   | 159  |
| LinJ30_V3.1280 | <i>L. infantum</i> | 105 | 182  | 286  |
| LinJ30_V3.1280 | <i>L. infantum</i> | 74  | 551  | 624  |
| LinJ30_V3.1280 | <i>L. infantum</i> | 183 | 748  | 930  |
| LinJ30_V3.1290 | <i>L. infantum</i> | 72  | 390  | 461  |
| LinJ30_V3.1290 | <i>L. infantum</i> | 201 | 523  | 723  |
| LinJ30_V3.1320 | <i>L. infantum</i> | 56  | 101  | 156  |
| LinJ30_V3.1320 | <i>L. infantum</i> | 44  | 270  | 313  |
| LinJ30_V3.1330 | <i>L. infantum</i> | 166 | 253  | 418  |
| LinJ30_V3.1330 | <i>L. infantum</i> | 54  | 525  | 578  |
| LinJ30_V3.1330 | <i>L. infantum</i> | 40  | 945  | 984  |
| LinJ30_V3.1330 | <i>L. infantum</i> | 50  | 1011 | 1060 |
| LinJ30_V3.1330 | <i>L. infantum</i> | 44  | 1418 | 1461 |
| LinJ30_V3.1330 | <i>L. infantum</i> | 114 | 1523 | 1636 |
| LinJ30_V3.1330 | <i>L. infantum</i> | 46  | 1761 | 1806 |
| LinJ30_V3.1330 | <i>L. infantum</i> | 42  | 1835 | 1876 |
| LinJ30_V3.1340 | <i>L. infantum</i> | 430 | 190  | 619  |
| LinJ30_V3.1340 | <i>L. infantum</i> | 66  | 639  | 704  |
| LinJ30_V3.1340 | <i>L. infantum</i> | 66  | 639  | 704  |
| LinJ30_V3.1350 | <i>L. infantum</i> | 127 | 1    | 127  |
| LinJ30_V3.1350 | <i>L. infantum</i> | 76  | 368  | 443  |
| LinJ30_V3.1350 | <i>L. infantum</i> | 97  | 756  | 852  |
| LinJ30_V3.1350 | <i>L. infantum</i> | 59  | 1165 | 1223 |
| LinJ30_V3.1360 | <i>L. infantum</i> | 81  | 1    | 81   |
| LinJ30_V3.1370 | <i>L. infantum</i> | 40  | 83   | 122  |
| LinJ30_V3.1370 | <i>L. infantum</i> | 42  | 189  | 230  |

|                |                    |     |      |      |
|----------------|--------------------|-----|------|------|
| LinJ30_V3.1370 | <i>L. infantum</i> | 100 | 529  | 628  |
| LinJ30_V3.1370 | <i>L. infantum</i> | 227 | 892  | 1118 |
| LinJ30_V3.1370 | <i>L. infantum</i> | 57  | 1148 | 1204 |
| LinJ30_V3.1380 | <i>L. infantum</i> | 254 | 1    | 254  |
| LinJ30_V3.1380 | <i>L. infantum</i> | 263 | 328  | 590  |
| LinJ30_V3.1380 | <i>L. infantum</i> | 191 | 674  | 864  |
| LinJ30_V3.1380 | <i>L. infantum</i> | 79  | 893  | 971  |
| LinJ30_V3.1380 | <i>L. infantum</i> | 62  | 1110 | 1171 |
| LinJ30_V3.1380 | <i>L. infantum</i> | 215 | 1210 | 1424 |
| LinJ30_V3.1380 | <i>L. infantum</i> | 57  | 1442 | 1498 |
| LinJ30_V3.1380 | <i>L. infantum</i> | 122 | 1593 | 1714 |
| LinJ30_V3.1390 | <i>L. infantum</i> | 41  | 155  | 195  |
| LinJ30_V3.1400 | <i>L. infantum</i> | 76  | 36   | 111  |
| LinJ30_V3.1400 | <i>L. infantum</i> | 170 | 149  | 318  |
| LinJ30_V3.1410 | <i>L. infantum</i> | 68  | 1    | 68   |
| LinJ30_V3.1410 | <i>L. infantum</i> | 196 | 158  | 353  |
| LinJ30_V3.1420 | <i>L. infantum</i> | 181 | 306  | 486  |
| LinJ30_V3.1430 | <i>L. infantum</i> | 269 | 43   | 311  |
| LinJ30_V3.1430 | <i>L. infantum</i> | 308 | 364  | 671  |
| LinJ30_V3.1430 | <i>L. infantum</i> | 162 | 676  | 837  |
| LinJ30_V3.1460 | <i>L. infantum</i> | 226 | 1    | 226  |
| LinJ30_V3.1470 | <i>L. infantum</i> | 47  | 1    | 47   |
| LinJ30_V3.1490 | <i>L. infantum</i> | 78  | 1    | 78   |
| LinJ30_V3.1500 | <i>L. infantum</i> | 62  | 18   | 79   |
| LinJ30_V3.1500 | <i>L. infantum</i> | 44  | 128  | 171  |
| LinJ30_V3.1500 | <i>L. infantum</i> | 91  | 361  | 451  |
| LinJ30_V3.1500 | <i>L. infantum</i> | 116 | 773  | 888  |
| LinJ30_V3.1500 | <i>L. infantum</i> | 126 | 1028 | 1153 |
| LinJ30_V3.1500 | <i>L. infantum</i> | 95  | 1197 | 1291 |
| LinJ30_V3.1500 | <i>L. infantum</i> | 51  | 1338 | 1388 |
| LinJ30_V3.1510 | <i>L. infantum</i> | 42  | 410  | 451  |
| LinJ30_V3.1510 | <i>L. infantum</i> | 86  | 460  | 545  |
| LinJ30_V3.1510 | <i>L. infantum</i> | 277 | 671  | 947  |
| LinJ30_V3.1530 | <i>L. infantum</i> | 44  | 102  | 145  |
| LinJ30_V3.1540 | <i>L. infantum</i> | 46  | 129  | 174  |
| LinJ30_V3.1540 | <i>L. infantum</i> | 62  | 301  | 362  |
| LinJ30_V3.1540 | <i>L. infantum</i> | 160 | 464  | 623  |
| LinJ30_V3.1540 | <i>L. infantum</i> | 90  | 767  | 856  |
| LinJ30_V3.1540 | <i>L. infantum</i> | 157 | 901  | 1057 |
| LinJ30_V3.1550 | <i>L. infantum</i> | 63  | 184  | 246  |
| LinJ30_V3.1570 | <i>L. infantum</i> | 49  | 1    | 49   |
| LinJ30_V3.1570 | <i>L. infantum</i> | 83  | 417  | 499  |
| LinJ30_V3.1570 | <i>L. infantum</i> | 83  | 417  | 499  |
| LinJ30_V3.1580 | <i>L. infantum</i> | 118 | 55   | 172  |
| LinJ30_V3.1580 | <i>L. infantum</i> | 124 | 181  | 304  |
| LinJ30_V3.1580 | <i>L. infantum</i> | 50  | 442  | 491  |
| LinJ30_V3.1580 | <i>L. infantum</i> | 44  | 501  | 544  |

|                |                    |     |      |      |
|----------------|--------------------|-----|------|------|
| LinJ30_V3.1580 | <i>L. infantum</i> | 133 | 564  | 696  |
| LinJ30_V3.1580 | <i>L. infantum</i> | 92  | 748  | 839  |
| LinJ30_V3.1580 | <i>L. infantum</i> | 86  | 841  | 926  |
| LinJ30_V3.1580 | <i>L. infantum</i> | 238 | 1031 | 1268 |
| LinJ30_V3.1580 | <i>L. infantum</i> | 184 | 1342 | 1525 |
| LinJ30_V3.1590 | <i>L. infantum</i> | 69  | 41   | 109  |
| LinJ30_V3.1590 | <i>L. infantum</i> | 53  | 224  | 276  |
| LinJ30_V3.1590 | <i>L. infantum</i> | 53  | 224  | 276  |
| LinJ30_V3.1600 | <i>L. infantum</i> | 107 | 107  | 213  |
| LinJ30_V3.1600 | <i>L. infantum</i> | 65  | 648  | 712  |
| LinJ30_V3.1610 | <i>L. infantum</i> | 112 | 45   | 156  |
| LinJ30_V3.1610 | <i>L. infantum</i> | 69  | 191  | 259  |
| LinJ30_V3.1610 | <i>L. infantum</i> | 69  | 191  | 259  |
| LinJ30_V3.1620 | <i>L. infantum</i> | 52  | 267  | 318  |
| LinJ30_V3.1620 | <i>L. infantum</i> | 114 | 373  | 486  |
| LinJ30_V3.1630 | <i>L. infantum</i> | 51  | 94   | 144  |
| LinJ30_V3.1630 | <i>L. infantum</i> | 43  | 678  | 720  |
| LinJ30_V3.1630 | <i>L. infantum</i> | 157 | 791  | 947  |
| LinJ30_V3.1640 | <i>L. infantum</i> | 150 | 1    | 150  |
| LinJ30_V3.1640 | <i>L. infantum</i> | 41  | 410  | 450  |
| LinJ30_V3.1640 | <i>L. infantum</i> | 93  | 604  | 696  |
| LinJ30_V3.1680 | <i>L. infantum</i> | 71  | 226  | 296  |
| LinJ30_V3.1690 | <i>L. infantum</i> | 240 | 113  | 352  |
| LinJ30_V3.1700 | <i>L. infantum</i> | 112 | 32   | 143  |
| LinJ30_V3.1700 | <i>L. infantum</i> | 93  | 202  | 294  |
| LinJ30_V3.1700 | <i>L. infantum</i> | 137 | 599  | 735  |
| LinJ30_V3.1710 | <i>L. infantum</i> | 43  | 193  | 235  |
| LinJ30_V3.1720 | <i>L. infantum</i> | 45  | 24   | 68   |
| LinJ30_V3.1730 | <i>L. infantum</i> | 366 | 26   | 391  |
| LinJ30_V3.1740 | <i>L. infantum</i> | 40  | 1    | 40   |
| LinJ30_V3.1750 | <i>L. infantum</i> | 46  | 1    | 46   |
| LinJ30_V3.1760 | <i>L. infantum</i> | 51  | 217  | 267  |
| LinJ30_V3.1760 | <i>L. infantum</i> | 169 | 497  | 665  |
| LinJ30_V3.1760 | <i>L. infantum</i> | 168 | 867  | 1034 |
| LinJ30_V3.1760 | <i>L. infantum</i> | 207 | 1224 | 1430 |
| LinJ30_V3.1760 | <i>L. infantum</i> | 198 | 1672 | 1869 |
| LinJ30_V3.1770 | <i>L. infantum</i> | 143 | 1    | 143  |
| LinJ30_V3.1780 | <i>L. infantum</i> | 43  | 102  | 144  |
| LinJ30_V3.1780 | <i>L. infantum</i> | 52  | 274  | 325  |
| LinJ30_V3.1780 | <i>L. infantum</i> | 47  | 580  | 626  |
| LinJ30_V3.1790 | <i>L. infantum</i> | 96  | 188  | 283  |
| LinJ30_V3.1790 | <i>L. infantum</i> | 418 | 323  | 740  |
| LinJ30_V3.1800 | <i>L. infantum</i> | 56  | 145  | 200  |
| LinJ30_V3.1810 | <i>L. infantum</i> | 129 | 1    | 129  |
| LinJ30_V3.1810 | <i>L. infantum</i> | 85  | 407  | 491  |
| LinJ30_V3.1810 | <i>L. infantum</i> | 63  | 1176 | 1238 |
| LinJ30_V3.1810 | <i>L. infantum</i> | 57  | 1575 | 1631 |



|                |                    |     |      |      |
|----------------|--------------------|-----|------|------|
| LinJ30_V3.1810 | <i>L. infantum</i> | 42  | 1839 | 1880 |
| LinJ30_V3.1810 | <i>L. infantum</i> | 113 | 2030 | 2142 |
| LinJ30_V3.1810 | <i>L. infantum</i> | 131 | 2333 | 2463 |
| LinJ30_V3.1810 | <i>L. infantum</i> | 150 | 2481 | 2630 |
| LinJ30_V3.1810 | <i>L. infantum</i> | 81  | 2827 | 2907 |
| LinJ30_V3.1810 | <i>L. infantum</i> | 40  | 3294 | 3333 |
| LinJ30_V3.1810 | <i>L. infantum</i> | 75  | 3472 | 3546 |
| LinJ30_V3.1810 | <i>L. infantum</i> | 93  | 3602 | 3694 |
| LinJ30_V3.1810 | <i>L. infantum</i> | 77  | 4089 | 4165 |
| LinJ30_V3.1810 | <i>L. infantum</i> | 71  | 5091 | 5161 |
| LinJ30_V3.1810 | <i>L. infantum</i> | 42  | 5238 | 5279 |
| LinJ30_V3.1820 | <i>L. infantum</i> | 55  | 265  | 319  |
| LinJ30_V3.1820 | <i>L. infantum</i> | 104 | 404  | 507  |
| LinJ30_V3.1820 | <i>L. infantum</i> | 53  | 569  | 621  |
| LinJ30_V3.1830 | <i>L. infantum</i> | 114 | 1    | 114  |
| LinJ30_V3.1830 | <i>L. infantum</i> | 204 | 122  | 325  |
| LinJ30_V3.1830 | <i>L. infantum</i> | 136 | 363  | 498  |
| LinJ30_V3.1830 | <i>L. infantum</i> | 233 | 513  | 745  |
| LinJ30_V3.1840 | <i>L. infantum</i> | 94  | 99   | 192  |
| LinJ30_V3.1840 | <i>L. infantum</i> | 73  | 199  | 271  |
| LinJ30_V3.1840 | <i>L. infantum</i> | 83  | 358  | 440  |
| LinJ30_V3.1840 | <i>L. infantum</i> | 60  | 979  | 1038 |
| LinJ30_V3.1840 | <i>L. infantum</i> | 56  | 1201 | 1256 |
| LinJ30_V3.1840 | <i>L. infantum</i> | 69  | 1306 | 1374 |
| LinJ30_V3.1850 | <i>L. infantum</i> | 83  | 148  | 230  |
| LinJ30_V3.1850 | <i>L. infantum</i> | 215 | 255  | 469  |
| LinJ30_V3.1860 | <i>L. infantum</i> | 76  | 1    | 76   |
| LinJ30_V3.1860 | <i>L. infantum</i> | 185 | 101  | 285  |
| LinJ30_V3.1860 | <i>L. infantum</i> | 69  | 295  | 363  |
| LinJ30_V3.1860 | <i>L. infantum</i> | 73  | 398  | 470  |
| LinJ30_V3.1860 | <i>L. infantum</i> | 133 | 496  | 628  |
| LinJ30_V3.1860 | <i>L. infantum</i> | 422 | 661  | 1082 |
| LinJ30_V3.1860 | <i>L. infantum</i> | 179 | 1094 | 1272 |
| LinJ30_V3.1870 | <i>L. infantum</i> | 72  | 47   | 118  |
| LinJ30_V3.1880 | <i>L. infantum</i> | 53  | 118  | 170  |
| LinJ30_V3.1890 | <i>L. infantum</i> | 84  | 167  | 250  |
| LinJ30_V3.1890 | <i>L. infantum</i> | 129 | 309  | 437  |
| LinJ30_V3.1890 | <i>L. infantum</i> | 112 | 523  | 634  |
| LinJ30_V3.1890 | <i>L. infantum</i> | 85  | 703  | 787  |
| LinJ30_V3.1900 | <i>L. infantum</i> | 53  | 89   | 141  |
| LinJ30_V3.1900 | <i>L. infantum</i> | 66  | 241  | 306  |
| LinJ30_V3.1900 | <i>L. infantum</i> | 93  | 513  | 605  |
| LinJ30_V3.1930 | <i>L. infantum</i> | 78  | 1    | 78   |
| LinJ30_V3.1930 | <i>L. infantum</i> | 162 | 271  | 432  |
| LinJ30_V3.1930 | <i>L. infantum</i> | 195 | 600  | 794  |
| LinJ30_V3.1930 | <i>L. infantum</i> | 328 | 797  | 1124 |
| LinJ30_V3.1940 | <i>L. infantum</i> | 89  | 129  | 217  |

|                |                    |     |      |      |
|----------------|--------------------|-----|------|------|
| LinJ30_V3.1940 | <i>L. infantum</i> | 41  | 321  | 361  |
| LinJ30_V3.1940 | <i>L. infantum</i> | 41  | 321  | 361  |
| LinJ30_V3.1950 | <i>L. infantum</i> | 122 | 57   | 178  |
| LinJ30_V3.1950 | <i>L. infantum</i> | 73  | 302  | 374  |
| LinJ30_V3.1950 | <i>L. infantum</i> | 73  | 302  | 374  |
| LinJ30_V3.1960 | <i>L. infantum</i> | 93  | 124  | 216  |
| LinJ30_V3.1960 | <i>L. infantum</i> | 206 | 224  | 429  |
| LinJ30_V3.1960 | <i>L. infantum</i> | 206 | 224  | 429  |
| LinJ30_V3.1970 | <i>L. infantum</i> | 60  | 124  | 183  |
| LinJ30_V3.1970 | <i>L. infantum</i> | 40  | 302  | 341  |
| LinJ30_V3.1970 | <i>L. infantum</i> | 40  | 302  | 341  |
| LinJ30_V3.1980 | <i>L. infantum</i> | 135 | 25   | 159  |
| LinJ30_V3.1990 | <i>L. infantum</i> | 55  | 55   | 109  |
| LinJ30_V3.1990 | <i>L. infantum</i> | 133 | 223  | 355  |
| LinJ30_V3.1990 | <i>L. infantum</i> | 42  | 546  | 587  |
| LinJ30_V3.1990 | <i>L. infantum</i> | 47  | 628  | 674  |
| LinJ30_V3.1990 | <i>L. infantum</i> | 83  | 749  | 831  |
| LinJ30_V3.1990 | <i>L. infantum</i> | 62  | 908  | 969  |
| LinJ30_V3.2000 | <i>L. infantum</i> | 56  | 74   | 129  |
| LinJ30_V3.2010 | <i>L. infantum</i> | 122 | 92   | 213  |
| LinJ30_V3.2010 | <i>L. infantum</i> | 268 | 242  | 509  |
| LinJ30_V3.2010 | <i>L. infantum</i> | 76  | 548  | 623  |
| LinJ30_V3.2010 | <i>L. infantum</i> | 316 | 644  | 959  |
| LinJ30_V3.2020 | <i>L. infantum</i> | 203 | 29   | 231  |
| LinJ30_V3.2020 | <i>L. infantum</i> | 88  | 251  | 338  |
| LinJ30_V3.2040 | <i>L. infantum</i> | 50  | 177  | 226  |
| LinJ30_V3.2040 | <i>L. infantum</i> | 45  | 320  | 364  |
| LinJ30_V3.2040 | <i>L. infantum</i> | 67  | 708  | 774  |
| LinJ30_V3.2040 | <i>L. infantum</i> | 44  | 896  | 939  |
| LinJ30_V3.2040 | <i>L. infantum</i> | 57  | 1021 | 1077 |
| LinJ30_V3.2060 | <i>L. infantum</i> | 61  | 129  | 189  |
| LinJ30_V3.2060 | <i>L. infantum</i> | 58  | 233  | 290  |
| LinJ30_V3.2060 | <i>L. infantum</i> | 118 | 538  | 655  |
| LinJ30_V3.2060 | <i>L. infantum</i> | 51  | 885  | 935  |
| LinJ30_V3.2060 | <i>L. infantum</i> | 136 | 958  | 1093 |
| LinJ30_V3.2070 | <i>L. infantum</i> | 239 | 1    | 239  |
| LinJ30_V3.2080 | <i>L. infantum</i> | 91  | 118  | 208  |
| LinJ30_V3.2090 | <i>L. infantum</i> | 55  | 1    | 55   |
| LinJ30_V3.2090 | <i>L. infantum</i> | 109 | 443  | 551  |
| LinJ30_V3.2110 | <i>L. infantum</i> | 84  | 55   | 138  |
| LinJ30_V3.2110 | <i>L. infantum</i> | 64  | 343  | 406  |
| LinJ30_V3.2110 | <i>L. infantum</i> | 49  | 482  | 530  |
| LinJ30_V3.2120 | <i>L. infantum</i> | 51  | 152  | 202  |
| LinJ30_V3.2120 | <i>L. infantum</i> | 157 | 232  | 388  |
| LinJ30_V3.2120 | <i>L. infantum</i> | 43  | 419  | 461  |
| LinJ30_V3.2130 | <i>L. infantum</i> | 127 | 179  | 305  |
| LinJ30_V3.2140 | <i>L. infantum</i> | 82  | 83   | 164  |

|                |                    |     |      |      |
|----------------|--------------------|-----|------|------|
| LinJ30_V3.2140 | <i>L. infantum</i> | 131 | 409  | 539  |
| LinJ30_V3.2140 | <i>L. infantum</i> | 71  | 673  | 743  |
| LinJ30_V3.2150 | <i>L. infantum</i> | 59  | 1    | 59   |
| LinJ30_V3.2150 | <i>L. infantum</i> | 66  | 242  | 307  |
| LinJ30_V3.2150 | <i>L. infantum</i> | 177 | 328  | 504  |
| LinJ30_V3.2160 | <i>L. infantum</i> | 66  | 406  | 471  |
| LinJ30_V3.2170 | <i>L. infantum</i> | 55  | 126  | 180  |
| LinJ30_V3.2170 | <i>L. infantum</i> | 220 | 403  | 622  |
| LinJ30_V3.2180 | <i>L. infantum</i> | 60  | 1    | 60   |
| LinJ30_V3.2180 | <i>L. infantum</i> | 41  | 379  | 419  |
| LinJ30_V3.2180 | <i>L. infantum</i> | 41  | 379  | 419  |
| LinJ30_V3.2190 | <i>L. infantum</i> | 333 | 171  | 503  |
| LinJ30_V3.2200 | <i>L. infantum</i> | 203 | 170  | 372  |
| LinJ30_V3.2200 | <i>L. infantum</i> | 53  | 382  | 434  |
| LinJ30_V3.2210 | <i>L. infantum</i> | 85  | 62   | 146  |
| LinJ30_V3.2230 | <i>L. infantum</i> | 88  | 33   | 120  |
| LinJ30_V3.2230 | <i>L. infantum</i> | 59  | 178  | 236  |
| LinJ30_V3.2240 | <i>L. infantum</i> | 93  | 75   | 167  |
| LinJ30_V3.2260 | <i>L. infantum</i> | 70  | 86   | 155  |
| LinJ30_V3.2260 | <i>L. infantum</i> | 70  | 266  | 335  |
| LinJ30_V3.2260 | <i>L. infantum</i> | 70  | 266  | 335  |
| LinJ30_V3.2270 | <i>L. infantum</i> | 102 | 772  | 873  |
| LinJ30_V3.2280 | <i>L. infantum</i> | 41  | 169  | 209  |
| LinJ30_V3.2280 | <i>L. infantum</i> | 55  | 223  | 277  |
| LinJ30_V3.2280 | <i>L. infantum</i> | 129 | 311  | 439  |
| LinJ30_V3.2280 | <i>L. infantum</i> | 222 | 479  | 700  |
| LinJ30_V3.2280 | <i>L. infantum</i> | 142 | 721  | 862  |
| LinJ30_V3.2280 | <i>L. infantum</i> | 42  | 904  | 945  |
| LinJ30_V3.2280 | <i>L. infantum</i> | 109 | 1052 | 1160 |
| LinJ30_V3.2280 | <i>L. infantum</i> | 49  | 1172 | 1220 |
| LinJ30_V3.2280 | <i>L. infantum</i> | 49  | 1340 | 1388 |
| LinJ30_V3.2280 | <i>L. infantum</i> | 75  | 1675 | 1749 |
| LinJ30_V3.2280 | <i>L. infantum</i> | 43  | 1756 | 1798 |
| LinJ30_V3.2290 | <i>L. infantum</i> | 82  | 1    | 82   |
| LinJ30_V3.2290 | <i>L. infantum</i> | 66  | 339  | 404  |
| LinJ30_V3.2300 | <i>L. infantum</i> | 92  | 21   | 112  |
| LinJ30_V3.2300 | <i>L. infantum</i> | 118 | 412  | 529  |
| LinJ30_V3.2300 | <i>L. infantum</i> | 54  | 712  | 765  |
| LinJ30_V3.2310 | <i>L. infantum</i> | 53  | 179  | 231  |
| LinJ30_V3.2310 | <i>L. infantum</i> | 87  | 509  | 595  |
| LinJ30_V3.2310 | <i>L. infantum</i> | 157 | 850  | 1006 |
| LinJ30_V3.2310 | <i>L. infantum</i> | 110 | 1036 | 1145 |
| LinJ30_V3.2310 | <i>L. infantum</i> | 61  | 1244 | 1304 |
| LinJ30_V3.2320 | <i>L. infantum</i> | 43  | 1    | 43   |
| LinJ30_V3.2340 | <i>L. infantum</i> | 49  | 248  | 296  |
| LinJ30_V3.2370 | <i>L. infantum</i> | 41  | 339  | 379  |
| LinJ30_V3.2390 | <i>L. infantum</i> | 97  | 14   | 110  |

|                |                    |     |      |      |
|----------------|--------------------|-----|------|------|
| LinJ30_V3.2390 | <i>L. infantum</i> | 52  | 113  | 164  |
| LinJ30_V3.2390 | <i>L. infantum</i> | 103 | 198  | 300  |
| LinJ30_V3.2400 | <i>L. infantum</i> | 198 | 883  | 1080 |
| LinJ30_V3.2400 | <i>L. infantum</i> | 83  | 1248 | 1330 |
| LinJ30_V3.2400 | <i>L. infantum</i> | 75  | 1454 | 1528 |
| LinJ30_V3.2400 | <i>L. infantum</i> | 45  | 1566 | 1610 |
| LinJ30_V3.2400 | <i>L. infantum</i> | 53  | 1727 | 1779 |
| LinJ30_V3.2400 | <i>L. infantum</i> | 68  | 2161 | 2228 |
| LinJ30_V3.2400 | <i>L. infantum</i> | 57  | 2673 | 2729 |
| LinJ30_V3.2400 | <i>L. infantum</i> | 45  | 2759 | 2803 |
| LinJ30_V3.2400 | <i>L. infantum</i> | 62  | 2944 | 3005 |
| LinJ30_V3.2400 | <i>L. infantum</i> | 44  | 3307 | 3350 |
| LinJ30_V3.2410 | <i>L. infantum</i> | 40  | 234  | 273  |
| LinJ30_V3.2440 | <i>L. infantum</i> | 953 | 268  | 1220 |
| LinJ30_V3.2450 | <i>L. infantum</i> | 58  | 399  | 456  |
| LinJ30_V3.2450 | <i>L. infantum</i> | 55  | 517  | 571  |
| LinJ30_V3.2450 | <i>L. infantum</i> | 73  | 672  | 744  |
| LinJ30_V3.2460 | <i>L. infantum</i> | 162 | 66   | 227  |
| LinJ30_V3.2470 | <i>L. infantum</i> | 87  | 529  | 615  |
| LinJ30_V3.2480 | <i>L. infantum</i> | 147 | 514  | 660  |
| LinJ30_V3.2520 | <i>L. infantum</i> | 171 | 119  | 289  |
| LinJ30_V3.2520 | <i>L. infantum</i> | 40  | 474  | 513  |
| LinJ30_V3.2530 | <i>L. infantum</i> | 148 | 514  | 661  |
| LinJ30_V3.2540 | <i>L. infantum</i> | 147 | 514  | 660  |
| LinJ30_V3.2550 | <i>L. infantum</i> | 208 | 1    | 208  |
| LinJ30_V3.2550 | <i>L. infantum</i> | 79  | 329  | 407  |
| LinJ30_V3.2550 | <i>L. infantum</i> | 44  | 512  | 555  |
| LinJ30_V3.2550 | <i>L. infantum</i> | 56  | 569  | 624  |
| LinJ30_V3.2550 | <i>L. infantum</i> | 84  | 634  | 717  |
| LinJ30_V3.2550 | <i>L. infantum</i> | 41  | 780  | 820  |
| LinJ30_V3.2550 | <i>L. infantum</i> | 54  | 970  | 1023 |
| LinJ30_V3.2560 | <i>L. infantum</i> | 90  | 101  | 190  |
| LinJ30_V3.2560 | <i>L. infantum</i> | 51  | 333  | 383  |
| LinJ30_V3.2600 | <i>L. infantum</i> | 76  | 1    | 76   |
| LinJ30_V3.2600 | <i>L. infantum</i> | 57  | 160  | 216  |
| LinJ30_V3.2610 | <i>L. infantum</i> | 326 | 1    | 326  |
| LinJ30_V3.2610 | <i>L. infantum</i> | 155 | 537  | 691  |
| LinJ30_V3.2630 | <i>L. infantum</i> | 83  | 171  | 253  |
| LinJ30_V3.2630 | <i>L. infantum</i> | 157 | 504  | 660  |
| LinJ30_V3.2630 | <i>L. infantum</i> | 170 | 662  | 831  |
| LinJ30_V3.2650 | <i>L. infantum</i> | 40  | 107  | 146  |
| LinJ30_V3.2660 | <i>L. infantum</i> | 60  | 49   | 108  |
| LinJ30_V3.2690 | <i>L. infantum</i> | 114 | 57   | 170  |
| LinJ30_V3.2690 | <i>L. infantum</i> | 88  | 207  | 294  |
| LinJ30_V3.2700 | <i>L. infantum</i> | 45  | 270  | 314  |
| LinJ30_V3.2710 | <i>L. infantum</i> | 401 | 15   | 415  |
| LinJ30_V3.2710 | <i>L. infantum</i> | 163 | 425  | 587  |

|                |                    |     |      |      |
|----------------|--------------------|-----|------|------|
| LinJ30_V3.2710 | <i>L. infantum</i> | 82  | 597  | 678  |
| LinJ30_V3.2710 | <i>L. infantum</i> | 82  | 731  | 812  |
| LinJ30_V3.2710 | <i>L. infantum</i> | 113 | 820  | 932  |
| LinJ30_V3.2720 | <i>L. infantum</i> | 179 | 139  | 317  |
| LinJ30_V3.2730 | <i>L. infantum</i> | 54  | 186  | 239  |
| LinJ30_V3.2730 | <i>L. infantum</i> | 172 | 278  | 449  |
| LinJ30_V3.2740 | <i>L. infantum</i> | 52  | 92   | 143  |
| LinJ30_V3.2740 | <i>L. infantum</i> | 116 | 228  | 343  |
| LinJ30_V3.2740 | <i>L. infantum</i> | 116 | 228  | 343  |
| LinJ30_V3.2750 | <i>L. infantum</i> | 48  | 187  | 234  |
| LinJ30_V3.2790 | <i>L. infantum</i> | 124 | 73   | 196  |
| LinJ30_V3.2790 | <i>L. infantum</i> | 60  | 227  | 286  |
| LinJ30_V3.2800 | <i>L. infantum</i> | 75  | 1    | 75   |
| LinJ30_V3.2810 | <i>L. infantum</i> | 89  | 31   | 119  |
| LinJ30_V3.2810 | <i>L. infantum</i> | 40  | 235  | 274  |
| LinJ30_V3.2810 | <i>L. infantum</i> | 40  | 235  | 274  |
| LinJ30_V3.2830 | <i>L. infantum</i> | 60  | 336  | 395  |
| LinJ30_V3.2840 | <i>L. infantum</i> | 564 | 1    | 564  |
| LinJ30_V3.2840 | <i>L. infantum</i> | 193 | 574  | 766  |
| LinJ30_V3.2850 | <i>L. infantum</i> | 48  | 33   | 80   |
| LinJ30_V3.2880 | <i>L. infantum</i> | 61  | 72   | 132  |
| LinJ30_V3.2890 | <i>L. infantum</i> | 45  | 101  | 145  |
| LinJ30_V3.2890 | <i>L. infantum</i> | 41  | 222  | 262  |
| LinJ30_V3.2890 | <i>L. infantum</i> | 86  | 385  | 470  |
| LinJ30_V3.2900 | <i>L. infantum</i> | 135 | 35   | 169  |
| LinJ30_V3.2910 | <i>L. infantum</i> | 44  | 414  | 457  |
| LinJ30_V3.2940 | <i>L. infantum</i> | 54  | 14   | 67   |
| LinJ30_V3.2940 | <i>L. infantum</i> | 361 | 94   | 454  |
| LinJ30_V3.2970 | <i>L. infantum</i> | 71  | 1    | 71   |
| LinJ30_V3.2980 | <i>L. infantum</i> | 91  | 135  | 225  |
| LinJ30_V3.3020 | <i>L. infantum</i> | 90  | 1    | 90   |
| LinJ30_V3.3030 | <i>L. infantum</i> | 132 | 155  | 286  |
| LinJ30_V3.3030 | <i>L. infantum</i> | 90  | 290  | 379  |
| LinJ30_V3.3050 | <i>L. infantum</i> | 121 | 201  | 321  |
| LinJ30_V3.3070 | <i>L. infantum</i> | 77  | 179  | 255  |
| LinJ30_V3.3070 | <i>L. infantum</i> | 101 | 399  | 499  |
| LinJ30_V3.3070 | <i>L. infantum</i> | 101 | 399  | 499  |
| LinJ30_V3.3080 | <i>L. infantum</i> | 123 | 17   | 139  |
| LinJ30_V3.3080 | <i>L. infantum</i> | 57  | 275  | 331  |
| LinJ30_V3.3080 | <i>L. infantum</i> | 40  | 492  | 531  |
| LinJ30_V3.3090 | <i>L. infantum</i> | 40  | 1007 | 1046 |
| LinJ30_V3.3090 | <i>L. infantum</i> | 45  | 1513 | 1557 |
| LinJ30_V3.3090 | <i>L. infantum</i> | 93  | 1808 | 1900 |
| LinJ30_V3.3100 | <i>L. infantum</i> | 76  | 1    | 76   |
| LinJ30_V3.3100 | <i>L. infantum</i> | 140 | 425  | 564  |
| LinJ30_V3.3100 | <i>L. infantum</i> | 201 | 623  | 823  |
| LinJ30_V3.3100 | <i>L. infantum</i> | 53  | 846  | 898  |

|                |                    |     |      |      |
|----------------|--------------------|-----|------|------|
| LinJ30_V3.3100 | <i>L. infantum</i> | 108 | 928  | 1035 |
| LinJ30_V3.3100 | <i>L. infantum</i> | 128 | 1063 | 1190 |
| LinJ30_V3.3110 | <i>L. infantum</i> | 119 | 1    | 119  |
| LinJ30_V3.3110 | <i>L. infantum</i> | 55  | 333  | 387  |
| LinJ30_V3.3130 | <i>L. infantum</i> | 138 | 128  | 265  |
| LinJ30_V3.3140 | <i>L. infantum</i> | 41  | 49   | 89   |
| LinJ30_V3.3140 | <i>L. infantum</i> | 58  | 269  | 326  |
| LinJ30_V3.3140 | <i>L. infantum</i> | 58  | 269  | 326  |
| LinJ30_V3.3170 | <i>L. infantum</i> | 62  | 906  | 967  |
| LinJ30_V3.3180 | <i>L. infantum</i> | 108 | 1    | 108  |
| LinJ30_V3.3210 | <i>L. infantum</i> | 381 | 1    | 381  |
| LinJ30_V3.3220 | <i>L. infantum</i> | 47  | 95   | 141  |
| LinJ30_V3.3250 | <i>L. infantum</i> | 49  | 155  | 203  |
| LinJ30_V3.3250 | <i>L. infantum</i> | 56  | 233  | 288  |
| LinJ30_V3.3250 | <i>L. infantum</i> | 44  | 304  | 347  |
| LinJ30_V3.3250 | <i>L. infantum</i> | 65  | 349  | 413  |
| LinJ30_V3.3250 | <i>L. infantum</i> | 212 | 448  | 659  |
| LinJ30_V3.3250 | <i>L. infantum</i> | 153 | 731  | 883  |
| LinJ30_V3.3290 | <i>L. infantum</i> | 40  | 144  | 183  |
| LinJ30_V3.3290 | <i>L. infantum</i> | 48  | 547  | 594  |
| LinJ30_V3.3290 | <i>L. infantum</i> | 48  | 547  | 594  |
| LinJ30_V3.3300 | <i>L. infantum</i> | 173 | 1    | 173  |
| LinJ30_V3.3300 | <i>L. infantum</i> | 149 | 448  | 596  |
| LinJ30_V3.3300 | <i>L. infantum</i> | 46  | 870  | 915  |
| LinJ30_V3.3310 | <i>L. infantum</i> | 122 | 290  | 411  |
| LinJ30_V3.3340 | <i>L. infantum</i> | 43  | 126  | 168  |
| LinJ30_V3.3340 | <i>L. infantum</i> | 96  | 471  | 566  |
| LinJ30_V3.3340 | <i>L. infantum</i> | 136 | 878  | 1013 |
| LinJ30_V3.3350 | <i>L. infantum</i> | 108 | 56   | 163  |
| LinJ30_V3.3350 | <i>L. infantum</i> | 53  | 215  | 267  |
| LinJ30_V3.3350 | <i>L. infantum</i> | 49  | 313  | 361  |
| LinJ30_V3.3370 | <i>L. infantum</i> | 56  | 1    | 56   |
| LinJ30_V3.3370 | <i>L. infantum</i> | 133 | 228  | 360  |
| LinJ30_V3.3380 | <i>L. infantum</i> | 262 | 65   | 326  |
| LinJ30_V3.3410 | <i>L. infantum</i> | 114 | 515  | 628  |
| LinJ30_V3.3420 | <i>L. infantum</i> | 531 | 41   | 571  |
| LinJ30_V3.3440 | <i>L. infantum</i> | 42  | 893  | 934  |
| LinJ30_V3.3460 | <i>L. infantum</i> | 60  | 55   | 114  |
| LinJ30_V3.3460 | <i>L. infantum</i> | 100 | 231  | 330  |
| LinJ30_V3.3460 | <i>L. infantum</i> | 100 | 231  | 330  |
| LinJ30_V3.3470 | <i>L. infantum</i> | 65  | 1    | 65   |
| LinJ30_V3.3470 | <i>L. infantum</i> | 68  | 225  | 292  |
| LinJ30_V3.3470 | <i>L. infantum</i> | 116 | 334  | 449  |
| LinJ30_V3.3480 | <i>L. infantum</i> | 58  | 742  | 799  |
| LinJ30_V3.3490 | <i>L. infantum</i> | 57  | 119  | 175  |
| LinJ30_V3.3500 | <i>L. infantum</i> | 72  | 1    | 72   |
| LinJ30_V3.3510 | <i>L. infantum</i> | 47  | 29   | 75   |

|                |                    |     |     |      |
|----------------|--------------------|-----|-----|------|
| LinJ30_V3.3510 | <i>L. infantum</i> | 54  | 236 | 289  |
| LinJ30_V3.3510 | <i>L. infantum</i> | 54  | 236 | 289  |
| LinJ30_V3.3540 | <i>L. infantum</i> | 88  | 78  | 165  |
| LinJ30_V3.3550 | <i>L. infantum</i> | 189 | 83  | 271  |
| LinJ30_V3.3570 | <i>L. infantum</i> | 189 | 83  | 271  |
| LinJ30_V3.3600 | <i>L. infantum</i> | 109 | 28  | 136  |
| LinJ30_V3.3600 | <i>L. infantum</i> | 50  | 175 | 224  |
| LinJ30_V3.3600 | <i>L. infantum</i> | 43  | 414 | 456  |
| LinJ30_V3.3610 | <i>L. infantum</i> | 41  | 328 | 368  |
| LinJ30_V3.3630 | <i>L. infantum</i> | 46  | 1   | 46   |
| LinJ30_V3.3630 | <i>L. infantum</i> | 63  | 88  | 150  |
| LinJ30_V3.3630 | <i>L. infantum</i> | 112 | 158 | 269  |
| LinJ30_V3.3640 | <i>L. infantum</i> | 146 | 1   | 146  |
| LinJ30_V3.3640 | <i>L. infantum</i> | 87  | 301 | 387  |
| LinJ30_V3.3640 | <i>L. infantum</i> | 72  | 555 | 626  |
| LinJ30_V3.3640 | <i>L. infantum</i> | 101 | 648 | 748  |
| LinJ30_V3.3650 | <i>L. infantum</i> | 49  | 96  | 144  |
| LinJ30_V3.3670 | <i>L. infantum</i> | 42  | 170 | 211  |
| LinJ30_V3.3670 | <i>L. infantum</i> | 46  | 267 | 312  |
| LinJ30_V3.3670 | <i>L. infantum</i> | 41  | 324 | 364  |
| LinJ30_V3.3680 | <i>L. infantum</i> | 148 | 48  | 195  |
| LinJ30_V3.3680 | <i>L. infantum</i> | 165 | 206 | 370  |
| LinJ30_V3.3710 | <i>L. infantum</i> | 51  | 39  | 89   |
| LinJ30_V3.3710 | <i>L. infantum</i> | 47  | 158 | 204  |
| LinJ30_V3.3710 | <i>L. infantum</i> | 47  | 158 | 204  |
| LinJ30_V3.3740 | <i>L. infantum</i> | 47  | 1   | 47   |
| LinJ30_V3.3740 | <i>L. infantum</i> | 64  | 89  | 152  |
| LinJ30_V3.3740 | <i>L. infantum</i> | 56  | 228 | 283  |
| LinJ30_V3.3750 | <i>L. infantum</i> | 76  | 68  | 143  |
| LinJ30_V3.3750 | <i>L. infantum</i> | 51  | 531 | 581  |
| LinJ30_V3.3750 | <i>L. infantum</i> | 51  | 531 | 581  |
| LinJ30_V3.3760 | <i>L. infantum</i> | 73  | 1   | 73   |
| LinJ30_V3.3770 | <i>L. infantum</i> | 45  | 268 | 312  |
| LinJ30_V3.3780 | <i>L. infantum</i> | 63  | 43  | 105  |
| LinJ30_V3.3790 | <i>L. infantum</i> | 60  | 46  | 105  |
| LinJ30_V3.3800 | <i>L. infantum</i> | 80  | 38  | 117  |
| LinJ30_V3.3800 | <i>L. infantum</i> | 92  | 131 | 222  |
| LinJ30_V3.3800 | <i>L. infantum</i> | 92  | 131 | 222  |
| LinJ31_V3.0030 | <i>L. infantum</i> | 47  | 1   | 47   |
| LinJ31_V3.0040 | <i>L. infantum</i> | 69  | 175 | 243  |
| LinJ31_V3.0040 | <i>L. infantum</i> | 92  | 961 | 1052 |
| LinJ31_V3.0080 | <i>L. infantum</i> | 95  | 111 | 205  |
| LinJ31_V3.0080 | <i>L. infantum</i> | 75  | 876 | 950  |
| LinJ31_V3.0090 | <i>L. infantum</i> | 127 | 1   | 127  |
| LinJ31_V3.0090 | <i>L. infantum</i> | 80  | 152 | 231  |
| LinJ31_V3.0100 | <i>L. infantum</i> | 54  | 301 | 354  |
| LinJ31_V3.0120 | <i>L. infantum</i> | 121 | 155 | 275  |

|                |                    |     |      |      |
|----------------|--------------------|-----|------|------|
| LinJ31_V3.0140 | <i>L. infantum</i> | 788 | 1    | 788  |
| LinJ31_V3.0170 | <i>L. infantum</i> | 45  | 880  | 924  |
| LinJ31_V3.0180 | <i>L. infantum</i> | 65  | 444  | 508  |
| LinJ31_V3.0200 | <i>L. infantum</i> | 222 | 1    | 222  |
| LinJ31_V3.0200 | <i>L. infantum</i> | 94  | 535  | 628  |
| LinJ31_V3.0230 | <i>L. infantum</i> | 115 | 1    | 115  |
| LinJ31_V3.0240 | <i>L. infantum</i> | 206 | 14   | 219  |
| LinJ31_V3.0240 | <i>L. infantum</i> | 179 | 256  | 434  |
| LinJ31_V3.0240 | <i>L. infantum</i> | 195 | 457  | 651  |
| LinJ31_V3.0240 | <i>L. infantum</i> | 115 | 663  | 777  |
| LinJ31_V3.0250 | <i>L. infantum</i> | 44  | 1    | 44   |
| LinJ31_V3.0260 | <i>L. infantum</i> | 50  | 1    | 50   |
| LinJ31_V3.0270 | <i>L. infantum</i> | 59  | 105  | 163  |
| LinJ31_V3.0280 | <i>L. infantum</i> | 47  | 97   | 143  |
| LinJ31_V3.0310 | <i>L. infantum</i> | 77  | 29   | 105  |
| LinJ31_V3.0310 | <i>L. infantum</i> | 203 | 132  | 334  |
| LinJ31_V3.0310 | <i>L. infantum</i> | 188 | 632  | 819  |
| LinJ31_V3.0310 | <i>L. infantum</i> | 72  | 880  | 951  |
| LinJ31_V3.0320 | <i>L. infantum</i> | 50  | 845  | 894  |
| LinJ31_V3.0330 | <i>L. infantum</i> | 104 | 281  | 384  |
| LinJ31_V3.0340 | <i>L. infantum</i> | 113 | 1    | 113  |
| LinJ31_V3.0370 | <i>L. infantum</i> | 90  | 1    | 90   |
| LinJ31_V3.0380 | <i>L. infantum</i> | 129 | 279  | 407  |
| LinJ31_V3.0380 | <i>L. infantum</i> | 77  | 916  | 992  |
| LinJ31_V3.0380 | <i>L. infantum</i> | 77  | 916  | 992  |
| LinJ31_V3.0390 | <i>L. infantum</i> | 156 | 64   | 219  |
| LinJ31_V3.0390 | <i>L. infantum</i> | 58  | 378  | 435  |
| LinJ31_V3.0390 | <i>L. infantum</i> | 58  | 378  | 435  |
| LinJ31_V3.0400 | <i>L. infantum</i> | 88  | 1    | 88   |
| LinJ31_V3.0400 | <i>L. infantum</i> | 40  | 118  | 157  |
| LinJ31_V3.0400 | <i>L. infantum</i> | 51  | 293  | 343  |
| LinJ31_V3.0400 | <i>L. infantum</i> | 67  | 596  | 662  |
| LinJ31_V3.0400 | <i>L. infantum</i> | 54  | 733  | 786  |
| LinJ31_V3.0400 | <i>L. infantum</i> | 71  | 800  | 870  |
| LinJ31_V3.0400 | <i>L. infantum</i> | 156 | 888  | 1043 |
| LinJ31_V3.0400 | <i>L. infantum</i> | 42  | 1091 | 1132 |
| LinJ31_V3.0400 | <i>L. infantum</i> | 47  | 1334 | 1380 |
| LinJ31_V3.0410 | <i>L. infantum</i> | 111 | 1    | 111  |
| LinJ31_V3.0420 | <i>L. infantum</i> | 99  | 98   | 196  |
| LinJ31_V3.0440 | <i>L. infantum</i> | 75  | 19   | 93   |
| LinJ31_V3.0440 | <i>L. infantum</i> | 72  | 150  | 221  |
| LinJ31_V3.0440 | <i>L. infantum</i> | 60  | 775  | 834  |
| LinJ31_V3.0450 | <i>L. infantum</i> | 46  | 1    | 46   |
| LinJ31_V3.0500 | <i>L. infantum</i> | 94  | 144  | 237  |
| LinJ31_V3.0510 | <i>L. infantum</i> | 116 | 1    | 116  |
| LinJ31_V3.0510 | <i>L. infantum</i> | 84  | 416  | 499  |
| LinJ31_V3.0520 | <i>L. infantum</i> | 111 | 1    | 111  |



|                |                    |     |      |      |
|----------------|--------------------|-----|------|------|
| LinJ31_V3.0520 | <i>L. infantum</i> | 137 | 147  | 283  |
| LinJ31_V3.0520 | <i>L. infantum</i> | 144 | 356  | 499  |
| LinJ31_V3.0520 | <i>L. infantum</i> | 88  | 552  | 639  |
| LinJ31_V3.0530 | <i>L. infantum</i> | 67  | 32   | 98   |
| LinJ31_V3.0530 | <i>L. infantum</i> | 68  | 217  | 284  |
| LinJ31_V3.0530 | <i>L. infantum</i> | 63  | 541  | 603  |
| LinJ31_V3.0540 | <i>L. infantum</i> | 89  | 62   | 150  |
| LinJ31_V3.0540 | <i>L. infantum</i> | 49  | 360  | 408  |
| LinJ31_V3.0540 | <i>L. infantum</i> | 49  | 360  | 408  |
| LinJ31_V3.0550 | <i>L. infantum</i> | 540 | 1    | 540  |
| LinJ31_V3.0550 | <i>L. infantum</i> | 133 | 546  | 678  |
| LinJ31_V3.0560 | <i>L. infantum</i> | 70  | 43   | 112  |
| LinJ31_V3.0560 | <i>L. infantum</i> | 94  | 748  | 841  |
| LinJ31_V3.0590 | <i>L. infantum</i> | 40  | 1    | 40   |
| LinJ31_V3.0600 | <i>L. infantum</i> | 46  | 50   | 95   |
| LinJ31_V3.0610 | <i>L. infantum</i> | 119 | 1    | 119  |
| LinJ31_V3.0630 | <i>L. infantum</i> | 88  | 44   | 131  |
| LinJ31_V3.0630 | <i>L. infantum</i> | 45  | 204  | 248  |
| LinJ31_V3.0630 | <i>L. infantum</i> | 49  | 257  | 305  |
| LinJ31_V3.0630 | <i>L. infantum</i> | 77  | 382  | 458  |
| LinJ31_V3.0640 | <i>L. infantum</i> | 91  | 1    | 91   |
| LinJ31_V3.0640 | <i>L. infantum</i> | 44  | 117  | 160  |
| LinJ31_V3.0640 | <i>L. infantum</i> | 71  | 185  | 255  |
| LinJ31_V3.0640 | <i>L. infantum</i> | 51  | 417  | 467  |
| LinJ31_V3.0650 | <i>L. infantum</i> | 93  | 89   | 181  |
| LinJ31_V3.0650 | <i>L. infantum</i> | 69  | 247  | 315  |
| LinJ31_V3.0650 | <i>L. infantum</i> | 55  | 369  | 423  |
| LinJ31_V3.0650 | <i>L. infantum</i> | 57  | 637  | 693  |
| LinJ31_V3.0660 | <i>L. infantum</i> | 110 | 115  | 224  |
| LinJ31_V3.0660 | <i>L. infantum</i> | 80  | 314  | 393  |
| LinJ31_V3.0660 | <i>L. infantum</i> | 60  | 520  | 579  |
| LinJ31_V3.0660 | <i>L. infantum</i> | 40  | 804  | 843  |
| LinJ31_V3.0670 | <i>L. infantum</i> | 80  | 1    | 80   |
| LinJ31_V3.0670 | <i>L. infantum</i> | 44  | 341  | 384  |
| LinJ31_V3.0670 | <i>L. infantum</i> | 44  | 341  | 384  |
| LinJ31_V3.0690 | <i>L. infantum</i> | 487 | 1    | 487  |
| LinJ31_V3.0690 | <i>L. infantum</i> | 176 | 562  | 737  |
| LinJ31_V3.0690 | <i>L. infantum</i> | 75  | 813  | 887  |
| LinJ31_V3.0690 | <i>L. infantum</i> | 55  | 917  | 971  |
| LinJ31_V3.0690 | <i>L. infantum</i> | 142 | 991  | 1132 |
| LinJ31_V3.0690 | <i>L. infantum</i> | 151 | 1138 | 1288 |
| LinJ31_V3.0690 | <i>L. infantum</i> | 184 | 1657 | 1840 |
| LinJ31_V3.0700 | <i>L. infantum</i> | 320 | 1    | 320  |
| LinJ31_V3.0700 | <i>L. infantum</i> | 367 | 324  | 690  |
| LinJ31_V3.0700 | <i>L. infantum</i> | 168 | 697  | 864  |
| LinJ31_V3.0700 | <i>L. infantum</i> | 42  | 930  | 971  |
| LinJ31_V3.0710 | <i>L. infantum</i> | 140 | 143  | 282  |

|                |                    |     |     |     |
|----------------|--------------------|-----|-----|-----|
| LinJ31_V3.0720 | <i>L. infantum</i> | 160 | 61  | 220 |
| LinJ31_V3.0720 | <i>L. infantum</i> | 109 | 374 | 482 |
| LinJ31_V3.0730 | <i>L. infantum</i> | 47  | 1   | 47  |
| LinJ31_V3.0730 | <i>L. infantum</i> | 76  | 59  | 134 |
| LinJ31_V3.0730 | <i>L. infantum</i> | 54  | 207 | 260 |
| LinJ31_V3.0730 | <i>L. infantum</i> | 108 | 521 | 628 |
| LinJ31_V3.0740 | <i>L. infantum</i> | 76  | 54  | 129 |
| LinJ31_V3.0750 | <i>L. infantum</i> | 56  | 1   | 56  |
| LinJ31_V3.0750 | <i>L. infantum</i> | 52  | 83  | 134 |
| LinJ31_V3.0750 | <i>L. infantum</i> | 245 | 442 | 686 |
| LinJ31_V3.0770 | <i>L. infantum</i> | 124 | 64  | 187 |
| LinJ31_V3.0780 | <i>L. infantum</i> | 74  | 107 | 180 |
| LinJ31_V3.0780 | <i>L. infantum</i> | 82  | 216 | 297 |
| LinJ31_V3.0780 | <i>L. infantum</i> | 82  | 216 | 297 |
| LinJ31_V3.0790 | <i>L. infantum</i> | 76  | 113 | 188 |
| LinJ31_V3.0790 | <i>L. infantum</i> | 66  | 222 | 287 |
| LinJ31_V3.0790 | <i>L. infantum</i> | 66  | 222 | 287 |
| LinJ31_V3.0800 | <i>L. infantum</i> | 61  | 98  | 158 |
| LinJ31_V3.0800 | <i>L. infantum</i> | 42  | 270 | 311 |
| LinJ31_V3.0800 | <i>L. infantum</i> | 42  | 270 | 311 |
| LinJ31_V3.0810 | <i>L. infantum</i> | 80  | 166 | 245 |
| LinJ31_V3.0820 | <i>L. infantum</i> | 162 | 127 | 288 |
| LinJ31_V3.0830 | <i>L. infantum</i> | 70  | 1   | 70  |
| LinJ31_V3.0830 | <i>L. infantum</i> | 79  | 152 | 230 |
| LinJ31_V3.0840 | <i>L. infantum</i> | 69  | 1   | 69  |
| LinJ31_V3.0840 | <i>L. infantum</i> | 117 | 158 | 274 |
| LinJ31_V3.0850 | <i>L. infantum</i> | 52  | 1   | 52  |
| LinJ31_V3.0880 | <i>L. infantum</i> | 61  | 98  | 158 |
| LinJ31_V3.0880 | <i>L. infantum</i> | 117 | 240 | 356 |
| LinJ31_V3.0890 | <i>L. infantum</i> | 47  | 191 | 237 |
| LinJ31_V3.0890 | <i>L. infantum</i> | 316 | 294 | 609 |
| LinJ31_V3.0900 | <i>L. infantum</i> | 62  | 1   | 62  |
| LinJ31_V3.0910 | <i>L. infantum</i> | 62  | 1   | 62  |
| LinJ31_V3.0920 | <i>L. infantum</i> | 116 | 43  | 158 |
| LinJ31_V3.0940 | <i>L. infantum</i> | 75  | 1   | 75  |
| LinJ31_V3.0950 | <i>L. infantum</i> | 79  | 63  | 141 |
| LinJ31_V3.0950 | <i>L. infantum</i> | 58  | 486 | 543 |
| LinJ31_V3.0970 | <i>L. infantum</i> | 43  | 27  | 69  |
| LinJ31_V3.0970 | <i>L. infantum</i> | 75  | 116 | 190 |
| LinJ31_V3.0970 | <i>L. infantum</i> | 52  | 341 | 392 |
| LinJ31_V3.0970 | <i>L. infantum</i> | 45  | 425 | 469 |
| LinJ31_V3.0970 | <i>L. infantum</i> | 206 | 561 | 766 |
| LinJ31_V3.0980 | <i>L. infantum</i> | 60  | 1   | 60  |
| LinJ31_V3.0980 | <i>L. infantum</i> | 248 | 476 | 723 |
| LinJ31_V3.0990 | <i>L. infantum</i> | 288 | 132 | 419 |
| LinJ31_V3.1000 | <i>L. infantum</i> | 52  | 1   | 52  |
| LinJ31_V3.1000 | <i>L. infantum</i> | 72  | 185 | 256 |

|                |                    |     |      |      |
|----------------|--------------------|-----|------|------|
| LinJ31_V3.1000 | <i>L. infantum</i> | 80  | 363  | 442  |
| LinJ31_V3.1000 | <i>L. infantum</i> | 458 | 551  | 1008 |
| LinJ31_V3.1010 | <i>L. infantum</i> | 176 | 1    | 176  |
| LinJ31_V3.1010 | <i>L. infantum</i> | 52  | 194  | 245  |
| LinJ31_V3.1010 | <i>L. infantum</i> | 61  | 525  | 585  |
| LinJ31_V3.1020 | <i>L. infantum</i> | 77  | 1    | 77   |
| LinJ31_V3.1020 | <i>L. infantum</i> | 88  | 117  | 204  |
| LinJ31_V3.1020 | <i>L. infantum</i> | 139 | 241  | 379  |
| LinJ31_V3.1020 | <i>L. infantum</i> | 61  | 386  | 446  |
| LinJ31_V3.1020 | <i>L. infantum</i> | 40  | 448  | 487  |
| LinJ31_V3.1020 | <i>L. infantum</i> | 53  | 711  | 763  |
| LinJ31_V3.1020 | <i>L. infantum</i> | 138 | 794  | 931  |
| LinJ31_V3.1030 | <i>L. infantum</i> | 63  | 1    | 63   |
| LinJ31_V3.1030 | <i>L. infantum</i> | 102 | 89   | 190  |
| LinJ31_V3.1030 | <i>L. infantum</i> | 57  | 318  | 374  |
| LinJ31_V3.1030 | <i>L. infantum</i> | 143 | 376  | 518  |
| LinJ31_V3.1030 | <i>L. infantum</i> | 45  | 814  | 858  |
| LinJ31_V3.1040 | <i>L. infantum</i> | 50  | 1    | 50   |
| LinJ31_V3.1040 | <i>L. infantum</i> | 46  | 199  | 244  |
| LinJ31_V3.1040 | <i>L. infantum</i> | 80  | 266  | 345  |
| LinJ31_V3.1040 | <i>L. infantum</i> | 41  | 371  | 411  |
| LinJ31_V3.1040 | <i>L. infantum</i> | 60  | 578  | 637  |
| LinJ31_V3.1050 | <i>L. infantum</i> | 384 | 1    | 384  |
| LinJ31_V3.1060 | <i>L. infantum</i> | 53  | 233  | 285  |
| LinJ31_V3.1060 | <i>L. infantum</i> | 51  | 403  | 453  |
| LinJ31_V3.1060 | <i>L. infantum</i> | 51  | 403  | 453  |
| LinJ31_V3.1080 | <i>L. infantum</i> | 946 | 33   | 978  |
| LinJ31_V3.1090 | <i>L. infantum</i> | 84  | 49   | 132  |
| LinJ31_V3.1090 | <i>L. infantum</i> | 508 | 175  | 682  |
| LinJ31_V3.1160 | <i>L. infantum</i> | 168 | 1    | 168  |
| LinJ31_V3.1160 | <i>L. infantum</i> | 182 | 568  | 749  |
| LinJ31_V3.1160 | <i>L. infantum</i> | 279 | 786  | 1064 |
| LinJ31_V3.1170 | <i>L. infantum</i> | 42  | 118  | 159  |
| LinJ31_V3.1170 | <i>L. infantum</i> | 60  | 418  | 477  |
| LinJ31_V3.1170 | <i>L. infantum</i> | 58  | 541  | 598  |
| LinJ31_V3.1190 | <i>L. infantum</i> | 44  | 44   | 87   |
| LinJ31_V3.1200 | <i>L. infantum</i> | 78  | 68   | 145  |
| LinJ31_V3.1230 | <i>L. infantum</i> | 46  | 59   | 104  |
| LinJ31_V3.1230 | <i>L. infantum</i> | 73  | 352  | 424  |
| LinJ31_V3.1230 | <i>L. infantum</i> | 40  | 472  | 511  |
| LinJ31_V3.1230 | <i>L. infantum</i> | 44  | 731  | 774  |
| LinJ31_V3.1230 | <i>L. infantum</i> | 43  | 1084 | 1126 |
| LinJ31_V3.1230 | <i>L. infantum</i> | 42  | 1499 | 1540 |
| LinJ31_V3.1230 | <i>L. infantum</i> | 54  | 1555 | 1608 |
| LinJ31_V3.1230 | <i>L. infantum</i> | 66  | 1690 | 1755 |
| LinJ31_V3.1230 | <i>L. infantum</i> | 95  | 2134 | 2228 |
| LinJ31_V3.1230 | <i>L. infantum</i> | 94  | 2915 | 3008 |

|                |                    |      |      |      |
|----------------|--------------------|------|------|------|
| LinJ31_V3.1230 | <i>L. infantum</i> | 48   | 3050 | 3097 |
| LinJ31_V3.1230 | <i>L. infantum</i> | 86   | 3228 | 3313 |
| LinJ31_V3.1230 | <i>L. infantum</i> | 40   | 3567 | 3606 |
| LinJ31_V3.1230 | <i>L. infantum</i> | 107  | 4270 | 4376 |
| LinJ31_V3.1230 | <i>L. infantum</i> | 65   | 4636 | 4700 |
| LinJ31_V3.1230 | <i>L. infantum</i> | 168  | 4737 | 4904 |
| LinJ31_V3.1250 | <i>L. infantum</i> | 88   | 279  | 366  |
| LinJ31_V3.1250 | <i>L. infantum</i> | 51   | 638  | 688  |
| LinJ31_V3.1250 | <i>L. infantum</i> | 41   | 704  | 744  |
| LinJ31_V3.1260 | <i>L. infantum</i> | 727  | 1    | 727  |
| LinJ31_V3.1260 | <i>L. infantum</i> | 244  | 746  | 989  |
| LinJ31_V3.1260 | <i>L. infantum</i> | 102  | 1078 | 1179 |
| LinJ31_V3.1260 | <i>L. infantum</i> | 80   | 1213 | 1292 |
| LinJ31_V3.1270 | <i>L. infantum</i> | 144  | 66   | 209  |
| LinJ31_V3.1270 | <i>L. infantum</i> | 101  | 317  | 417  |
| LinJ31_V3.1270 | <i>L. infantum</i> | 620  | 471  | 1090 |
| LinJ31_V3.1280 | <i>L. infantum</i> | 82   | 86   | 167  |
| LinJ31_V3.1280 | <i>L. infantum</i> | 101  | 281  | 381  |
| LinJ31_V3.1280 | <i>L. infantum</i> | 135  | 431  | 565  |
| LinJ31_V3.1290 | <i>L. infantum</i> | 53   | 1    | 53   |
| LinJ31_V3.1290 | <i>L. infantum</i> | 80   | 681  | 760  |
| LinJ31_V3.1290 | <i>L. infantum</i> | 69   | 975  | 1043 |
| LinJ31_V3.1300 | <i>L. infantum</i> | 40   | 273  | 312  |
| LinJ31_V3.1310 | <i>L. infantum</i> | 58   | 1    | 58   |
| LinJ31_V3.1310 | <i>L. infantum</i> | 68   | 854  | 921  |
| LinJ31_V3.1320 | <i>L. infantum</i> | 205  | 1    | 205  |
| LinJ31_V3.1320 | <i>L. infantum</i> | 716  | 245  | 960  |
| LinJ31_V3.1330 | <i>L. infantum</i> | 1122 | 1    | 1122 |
| LinJ31_V3.1330 | <i>L. infantum</i> | 153  | 1145 | 1297 |
| LinJ31_V3.1330 | <i>L. infantum</i> | 220  | 1310 | 1529 |
| LinJ31_V3.1340 | <i>L. infantum</i> | 580  | 1    | 580  |
| LinJ31_V3.1340 | <i>L. infantum</i> | 136  | 589  | 724  |
| LinJ31_V3.1340 | <i>L. infantum</i> | 318  | 753  | 1070 |
| LinJ31_V3.1340 | <i>L. infantum</i> | 169  | 1072 | 1240 |
| LinJ31_V3.1340 | <i>L. infantum</i> | 182  | 1255 | 1436 |
| LinJ31_V3.1340 | <i>L. infantum</i> | 77   | 1457 | 1533 |
| LinJ31_V3.1340 | <i>L. infantum</i> | 92   | 1690 | 1781 |
| LinJ31_V3.1340 | <i>L. infantum</i> | 109  | 1831 | 1939 |
| LinJ31_V3.1340 | <i>L. infantum</i> | 97   | 2002 | 2098 |
| LinJ31_V3.1340 | <i>L. infantum</i> | 94   | 2118 | 2211 |
| LinJ31_V3.1340 | <i>L. infantum</i> | 74   | 2447 | 2520 |
| LinJ31_V3.1350 | <i>L. infantum</i> | 383  | 1    | 383  |
| LinJ31_V3.1350 | <i>L. infantum</i> | 192  | 403  | 594  |
| LinJ31_V3.1350 | <i>L. infantum</i> | 131  | 634  | 764  |
| LinJ31_V3.1350 | <i>L. infantum</i> | 152  | 897  | 1048 |
| LinJ31_V3.1350 | <i>L. infantum</i> | 299  | 1051 | 1349 |
| LinJ31_V3.1350 | <i>L. infantum</i> | 136  | 1411 | 1546 |

|                |                    |     |      |      |
|----------------|--------------------|-----|------|------|
| LinJ31_V3.1350 | <i>L. infantum</i> | 269 | 1551 | 1819 |
| LinJ31_V3.1350 | <i>L. infantum</i> | 62  | 1840 | 1901 |
| LinJ31_V3.1360 | <i>L. infantum</i> | 42  | 1    | 42   |
| LinJ31_V3.1360 | <i>L. infantum</i> | 126 | 101  | 226  |
| LinJ31_V3.1360 | <i>L. infantum</i> | 97  | 230  | 326  |
| LinJ31_V3.1360 | <i>L. infantum</i> | 47  | 359  | 405  |
| LinJ31_V3.1360 | <i>L. infantum</i> | 53  | 448  | 500  |
| LinJ31_V3.1370 | <i>L. infantum</i> | 145 | 1    | 145  |
| LinJ31_V3.1370 | <i>L. infantum</i> | 92  | 178  | 269  |
| LinJ31_V3.1370 | <i>L. infantum</i> | 47  | 304  | 350  |
| LinJ31_V3.1380 | <i>L. infantum</i> | 103 | 1    | 103  |
| LinJ31_V3.1380 | <i>L. infantum</i> | 181 | 141  | 321  |
| LinJ31_V3.1390 | <i>L. infantum</i> | 994 | 1    | 994  |
| LinJ31_V3.1390 | <i>L. infantum</i> | 173 | 1050 | 1222 |
| LinJ31_V3.1390 | <i>L. infantum</i> | 47  | 1372 | 1418 |
| LinJ31_V3.1400 | <i>L. infantum</i> | 149 | 40   | 188  |
| LinJ31_V3.1400 | <i>L. infantum</i> | 334 | 190  | 523  |
| LinJ31_V3.1400 | <i>L. infantum</i> | 51  | 557  | 607  |
| LinJ31_V3.1400 | <i>L. infantum</i> | 254 | 620  | 873  |
| LinJ31_V3.1410 | <i>L. infantum</i> | 345 | 1    | 345  |
| LinJ31_V3.1410 | <i>L. infantum</i> | 244 | 355  | 598  |
| LinJ31_V3.1410 | <i>L. infantum</i> | 42  | 624  | 665  |
| LinJ31_V3.1420 | <i>L. infantum</i> | 53  | 74   | 126  |
| LinJ31_V3.1430 | <i>L. infantum</i> | 93  | 82   | 174  |
| LinJ31_V3.1430 | <i>L. infantum</i> | 97  | 197  | 293  |
| LinJ31_V3.1430 | <i>L. infantum</i> | 46  | 406  | 451  |
| LinJ31_V3.1430 | <i>L. infantum</i> | 76  | 532  | 607  |
| LinJ31_V3.1430 | <i>L. infantum</i> | 121 | 622  | 742  |
| LinJ31_V3.1430 | <i>L. infantum</i> | 93  | 844  | 936  |
| LinJ31_V3.1430 | <i>L. infantum</i> | 55  | 951  | 1005 |
| LinJ31_V3.1430 | <i>L. infantum</i> | 171 | 1102 | 1272 |
| LinJ31_V3.1440 | <i>L. infantum</i> | 50  | 76   | 125  |
| LinJ31_V3.1440 | <i>L. infantum</i> | 40  | 221  | 260  |
| LinJ31_V3.1440 | <i>L. infantum</i> | 69  | 357  | 425  |
| LinJ31_V3.1440 | <i>L. infantum</i> | 40  | 467  | 506  |
| LinJ31_V3.1440 | <i>L. infantum</i> | 46  | 553  | 598  |
| LinJ31_V3.1440 | <i>L. infantum</i> | 125 | 644  | 768  |
| LinJ31_V3.1440 | <i>L. infantum</i> | 61  | 824  | 884  |
| LinJ31_V3.1440 | <i>L. infantum</i> | 102 | 953  | 1054 |
| LinJ31_V3.1440 | <i>L. infantum</i> | 97  | 1088 | 1184 |
| LinJ31_V3.1440 | <i>L. infantum</i> | 287 | 1328 | 1614 |
| LinJ31_V3.1440 | <i>L. infantum</i> | 496 | 1637 | 2132 |
| LinJ31_V3.1440 | <i>L. infantum</i> | 128 | 2140 | 2267 |
| LinJ31_V3.1440 | <i>L. infantum</i> | 110 | 2285 | 2394 |
| LinJ31_V3.1450 | <i>L. infantum</i> | 75  | 21   | 95   |
| LinJ31_V3.1450 | <i>L. infantum</i> | 78  | 155  | 232  |
| LinJ31_V3.1450 | <i>L. infantum</i> | 62  | 442  | 503  |

|                |                    |     |      |      |
|----------------|--------------------|-----|------|------|
| LinJ31_V3.1450 | <i>L. infantum</i> | 88  | 629  | 716  |
| LinJ31_V3.1450 | <i>L. infantum</i> | 290 | 745  | 1034 |
| LinJ31_V3.1450 | <i>L. infantum</i> | 87  | 1051 | 1137 |
| LinJ31_V3.1460 | <i>L. infantum</i> | 40  | 670  | 709  |
| LinJ31_V3.1460 | <i>L. infantum</i> | 52  | 795  | 846  |
| LinJ31_V3.1460 | <i>L. infantum</i> | 147 | 964  | 1110 |
| LinJ31_V3.1460 | <i>L. infantum</i> | 45  | 1447 | 1491 |
| LinJ31_V3.1460 | <i>L. infantum</i> | 61  | 1746 | 1806 |
| LinJ31_V3.1470 | <i>L. infantum</i> | 138 | 283  | 420  |
| LinJ31_V3.1480 | <i>L. infantum</i> | 185 | 269  | 453  |
| LinJ31_V3.1500 | <i>L. infantum</i> | 44  | 108  | 151  |
| LinJ31_V3.1500 | <i>L. infantum</i> | 118 | 211  | 328  |
| LinJ31_V3.1500 | <i>L. infantum</i> | 62  | 406  | 467  |
| LinJ31_V3.1500 | <i>L. infantum</i> | 52  | 501  | 552  |
| LinJ31_V3.1500 | <i>L. infantum</i> | 177 | 585  | 761  |
| LinJ31_V3.1500 | <i>L. infantum</i> | 78  | 782  | 859  |
| LinJ31_V3.1510 | <i>L. infantum</i> | 55  | 120  | 174  |
| LinJ31_V3.1510 | <i>L. infantum</i> | 73  | 400  | 472  |
| LinJ31_V3.1510 | <i>L. infantum</i> | 67  | 514  | 580  |
| LinJ31_V3.1510 | <i>L. infantum</i> | 40  | 682  | 721  |
| LinJ31_V3.1510 | <i>L. infantum</i> | 112 | 769  | 880  |
| LinJ31_V3.1510 | <i>L. infantum</i> | 61  | 1148 | 1208 |
| LinJ31_V3.1510 | <i>L. infantum</i> | 43  | 1397 | 1439 |
| LinJ31_V3.1520 | <i>L. infantum</i> | 89  | 140  | 228  |
| LinJ31_V3.1520 | <i>L. infantum</i> | 155 | 381  | 535  |
| LinJ31_V3.1520 | <i>L. infantum</i> | 64  | 1110 | 1173 |
| LinJ31_V3.1520 | <i>L. infantum</i> | 51  | 1267 | 1317 |
| LinJ31_V3.1520 | <i>L. infantum</i> | 62  | 1352 | 1413 |
| LinJ31_V3.1530 | <i>L. infantum</i> | 89  | 80   | 168  |
| LinJ31_V3.1530 | <i>L. infantum</i> | 85  | 296  | 380  |
| LinJ31_V3.1530 | <i>L. infantum</i> | 74  | 436  | 509  |
| LinJ31_V3.1530 | <i>L. infantum</i> | 50  | 550  | 599  |
| LinJ31_V3.1530 | <i>L. infantum</i> | 156 | 804  | 959  |
| LinJ31_V3.1530 | <i>L. infantum</i> | 66  | 973  | 1038 |
| LinJ31_V3.1530 | <i>L. infantum</i> | 93  | 1043 | 1135 |
| LinJ31_V3.1540 | <i>L. infantum</i> | 105 | 511  | 615  |
| LinJ31_V3.1540 | <i>L. infantum</i> | 397 | 845  | 1241 |
| LinJ31_V3.1540 | <i>L. infantum</i> | 409 | 1286 | 1694 |
| LinJ31_V3.1550 | <i>L. infantum</i> | 63  | 492  | 554  |
| LinJ31_V3.1550 | <i>L. infantum</i> | 238 | 623  | 860  |
| LinJ31_V3.1550 | <i>L. infantum</i> | 65  | 881  | 945  |
| LinJ31_V3.1560 | <i>L. infantum</i> | 306 | 1    | 306  |
| LinJ31_V3.1560 | <i>L. infantum</i> | 94  | 353  | 446  |
| LinJ31_V3.1560 | <i>L. infantum</i> | 59  | 483  | 541  |
| LinJ31_V3.1560 | <i>L. infantum</i> | 77  | 622  | 698  |
| LinJ31_V3.1560 | <i>L. infantum</i> | 153 | 709  | 861  |
| LinJ31_V3.1560 | <i>L. infantum</i> | 296 | 915  | 1210 |

|                |                    |     |      |      |
|----------------|--------------------|-----|------|------|
| LinJ31_V3.1560 | <i>L. infantum</i> | 156 | 1313 | 1468 |
| LinJ31_V3.1560 | <i>L. infantum</i> | 277 | 1820 | 2096 |
| LinJ31_V3.1560 | <i>L. infantum</i> | 172 | 2112 | 2283 |
| LinJ31_V3.1570 | <i>L. infantum</i> | 183 | 34   | 216  |
| LinJ31_V3.1570 | <i>L. infantum</i> | 92  | 218  | 309  |
| LinJ31_V3.1570 | <i>L. infantum</i> | 88  | 337  | 424  |
| LinJ31_V3.1590 | <i>L. infantum</i> | 54  | 269  | 322  |
| LinJ31_V3.1610 | <i>L. infantum</i> | 58  | 43   | 100  |
| LinJ31_V3.1630 | <i>L. infantum</i> | 45  | 19   | 63   |
| LinJ31_V3.1660 | <i>L. infantum</i> | 58  | 223  | 280  |
| LinJ31_V3.1690 | <i>L. infantum</i> | 40  | 1    | 40   |
| LinJ31_V3.1690 | <i>L. infantum</i> | 40  | 164  | 203  |
| LinJ31_V3.1690 | <i>L. infantum</i> | 40  | 164  | 203  |
| LinJ31_V3.1700 | <i>L. infantum</i> | 176 | 43   | 218  |
| LinJ31_V3.1710 | <i>L. infantum</i> | 43  | 259  | 301  |
| LinJ31_V3.1710 | <i>L. infantum</i> | 57  | 470  | 526  |
| LinJ31_V3.1710 | <i>L. infantum</i> | 49  | 750  | 798  |
| LinJ31_V3.1710 | <i>L. infantum</i> | 65  | 1018 | 1082 |
| LinJ31_V3.1720 | <i>L. infantum</i> | 197 | 22   | 218  |
| LinJ31_V3.1720 | <i>L. infantum</i> | 60  | 305  | 364  |
| LinJ31_V3.1730 | <i>L. infantum</i> | 161 | 1    | 161  |
| LinJ31_V3.1730 | <i>L. infantum</i> | 96  | 200  | 295  |
| LinJ31_V3.1730 | <i>L. infantum</i> | 40  | 322  | 361  |
| LinJ31_V3.1730 | <i>L. infantum</i> | 41  | 567  | 607  |
| LinJ31_V3.1740 | <i>L. infantum</i> | 50  | 1    | 50   |
| LinJ31_V3.1740 | <i>L. infantum</i> | 66  | 728  | 793  |
| LinJ31_V3.1750 | <i>L. infantum</i> | 279 | 35   | 313  |
| LinJ31_V3.1750 | <i>L. infantum</i> | 53  | 330  | 382  |
| LinJ31_V3.1760 | <i>L. infantum</i> | 53  | 59   | 111  |
| LinJ31_V3.1760 | <i>L. infantum</i> | 71  | 219  | 289  |
| LinJ31_V3.1760 | <i>L. infantum</i> | 90  | 327  | 416  |
| LinJ31_V3.1770 | <i>L. infantum</i> | 59  | 84   | 142  |
| LinJ31_V3.1770 | <i>L. infantum</i> | 70  | 234  | 303  |
| LinJ31_V3.1770 | <i>L. infantum</i> | 76  | 328  | 403  |
| LinJ31_V3.1780 | <i>L. infantum</i> | 77  | 1    | 77   |
| LinJ31_V3.1780 | <i>L. infantum</i> | 54  | 290  | 343  |
| LinJ31_V3.1780 | <i>L. infantum</i> | 54  | 290  | 343  |
| LinJ31_V3.1790 | <i>L. infantum</i> | 137 | 1    | 137  |
| LinJ31_V3.1790 | <i>L. infantum</i> | 76  | 309  | 384  |
| LinJ31_V3.1790 | <i>L. infantum</i> | 371 | 616  | 986  |
| LinJ31_V3.1800 | <i>L. infantum</i> | 76  | 386  | 461  |
| LinJ31_V3.1810 | <i>L. infantum</i> | 65  | 1    | 65   |
| LinJ31_V3.1810 | <i>L. infantum</i> | 64  | 441  | 504  |
| LinJ31_V3.1820 | <i>L. infantum</i> | 76  | 461  | 536  |
| LinJ31_V3.1830 | <i>L. infantum</i> | 44  | 1    | 44   |
| LinJ31_V3.1830 | <i>L. infantum</i> | 44  | 423  | 466  |
| LinJ31_V3.1850 | <i>L. infantum</i> | 65  | 1    | 65   |

|                |                    |     |      |      |
|----------------|--------------------|-----|------|------|
| LinJ31_V3.1850 | <i>L. infantum</i> | 64  | 441  | 504  |
| LinJ31_V3.1860 | <i>L. infantum</i> | 65  | 1    | 65   |
| LinJ31_V3.1860 | <i>L. infantum</i> | 64  | 441  | 504  |
| LinJ31_V3.1870 | <i>L. infantum</i> | 99  | 517  | 615  |
| LinJ31_V3.1870 | <i>L. infantum</i> | 90  | 653  | 742  |
| LinJ31_V3.1870 | <i>L. infantum</i> | 41  | 777  | 817  |
| LinJ31_V3.1880 | <i>L. infantum</i> | 56  | 558  | 613  |
| LinJ31_V3.1880 | <i>L. infantum</i> | 91  | 652  | 742  |
| LinJ31_V3.1880 | <i>L. infantum</i> | 43  | 777  | 819  |
| LinJ31_V3.1880 | <i>L. infantum</i> | 42  | 959  | 1000 |
| LinJ31_V3.1890 | <i>L. infantum</i> | 68  | 34   | 101  |
| LinJ31_V3.1900 | <i>L. infantum</i> | 41  | 112  | 152  |
| LinJ31_V3.1910 | <i>L. infantum</i> | 87  | 88   | 174  |
| LinJ31_V3.1920 | <i>L. infantum</i> | 76  | 782  | 857  |
| LinJ31_V3.1940 | <i>L. infantum</i> | 304 | 13   | 316  |
| LinJ31_V3.1940 | <i>L. infantum</i> | 84  | 333  | 416  |
| LinJ31_V3.1940 | <i>L. infantum</i> | 96  | 424  | 519  |
| LinJ31_V3.1940 | <i>L. infantum</i> | 206 | 614  | 819  |
| LinJ31_V3.1950 | <i>L. infantum</i> | 138 | 118  | 255  |
| LinJ31_V3.1950 | <i>L. infantum</i> | 328 | 601  | 928  |
| LinJ31_V3.1950 | <i>L. infantum</i> | 114 | 1179 | 1292 |
| LinJ31_V3.1970 | <i>L. infantum</i> | 90  | 530  | 619  |
| LinJ31_V3.1980 | <i>L. infantum</i> | 373 | 46   | 418  |
| LinJ31_V3.1980 | <i>L. infantum</i> | 56  | 423  | 478  |
| LinJ31_V3.1990 | <i>L. infantum</i> | 324 | 46   | 369  |
| LinJ31_V3.1990 | <i>L. infantum</i> | 144 | 429  | 572  |
| LinJ31_V3.2010 | <i>L. infantum</i> | 50  | 1    | 50   |
| LinJ31_V3.2010 | <i>L. infantum</i> | 65  | 84   | 148  |
| LinJ31_V3.2010 | <i>L. infantum</i> | 65  | 84   | 148  |
| LinJ31_V3.2030 | <i>L. infantum</i> | 347 | 1    | 347  |
| LinJ31_V3.2030 | <i>L. infantum</i> | 380 | 358  | 737  |
| LinJ31_V3.2030 | <i>L. infantum</i> | 83  | 740  | 822  |
| LinJ31_V3.2030 | <i>L. infantum</i> | 59  | 877  | 935  |
| LinJ31_V3.2030 | <i>L. infantum</i> | 136 | 982  | 1117 |
| LinJ31_V3.2040 | <i>L. infantum</i> | 86  | 415  | 500  |
| LinJ31_V3.2050 | <i>L. infantum</i> | 71  | 25   | 95   |
| LinJ31_V3.2050 | <i>L. infantum</i> | 216 | 115  | 330  |
| LinJ31_V3.2050 | <i>L. infantum</i> | 341 | 336  | 676  |
| LinJ31_V3.2080 | <i>L. infantum</i> | 72  | 18   | 89   |
| LinJ31_V3.2080 | <i>L. infantum</i> | 232 | 124  | 355  |
| LinJ31_V3.2100 | <i>L. infantum</i> | 41  | 1    | 41   |
| LinJ31_V3.2120 | <i>L. infantum</i> | 40  | 119  | 158  |
| LinJ31_V3.2130 | <i>L. infantum</i> | 148 | 1    | 148  |
| LinJ31_V3.2130 | <i>L. infantum</i> | 52  | 228  | 279  |
| LinJ31_V3.2130 | <i>L. infantum</i> | 79  | 294  | 372  |
| LinJ31_V3.2130 | <i>L. infantum</i> | 44  | 405  | 448  |
| LinJ31_V3.2130 | <i>L. infantum</i> | 46  | 600  | 645  |



|                |                    |     |      |      |
|----------------|--------------------|-----|------|------|
| LinJ31_V3.2140 | <i>L. infantum</i> | 57  | 1    | 57   |
| LinJ31_V3.2140 | <i>L. infantum</i> | 112 | 105  | 216  |
| LinJ31_V3.2140 | <i>L. infantum</i> | 40  | 246  | 285  |
| LinJ31_V3.2150 | <i>L. infantum</i> | 47  | 1    | 47   |
| LinJ31_V3.2150 | <i>L. infantum</i> | 57  | 70   | 126  |
| LinJ31_V3.2150 | <i>L. infantum</i> | 148 | 133  | 280  |
| LinJ31_V3.2150 | <i>L. infantum</i> | 95  | 297  | 391  |
| LinJ31_V3.2160 | <i>L. infantum</i> | 215 | 74   | 288  |
| LinJ31_V3.2160 | <i>L. infantum</i> | 278 | 317  | 594  |
| LinJ31_V3.2160 | <i>L. infantum</i> | 290 | 610  | 899  |
| LinJ31_V3.2160 | <i>L. infantum</i> | 113 | 924  | 1036 |
| LinJ31_V3.2160 | <i>L. infantum</i> | 72  | 1040 | 1111 |
| LinJ31_V3.2170 | <i>L. infantum</i> | 359 | 1    | 359  |
| LinJ31_V3.2180 | <i>L. infantum</i> | 76  | 29   | 104  |
| LinJ31_V3.2180 | <i>L. infantum</i> | 247 | 139  | 385  |
| LinJ31_V3.2180 | <i>L. infantum</i> | 62  | 449  | 510  |
| LinJ31_V3.2180 | <i>L. infantum</i> | 182 | 582  | 763  |
| LinJ31_V3.2190 | <i>L. infantum</i> | 62  | 1    | 62   |
| LinJ31_V3.2190 | <i>L. infantum</i> | 40  | 351  | 390  |
| LinJ31_V3.2190 | <i>L. infantum</i> | 45  | 693  | 737  |
| LinJ31_V3.2200 | <i>L. infantum</i> | 792 | 1    | 792  |
| LinJ31_V3.2200 | <i>L. infantum</i> | 206 | 818  | 1023 |
| LinJ31_V3.2220 | <i>L. infantum</i> | 488 | 1    | 488  |
| LinJ31_V3.2220 | <i>L. infantum</i> | 225 | 490  | 714  |
| LinJ31_V3.2240 | <i>L. infantum</i> | 286 | 1    | 286  |
| LinJ31_V3.2240 | <i>L. infantum</i> | 537 | 317  | 853  |
| LinJ31_V3.2250 | <i>L. infantum</i> | 375 | 10   | 384  |
| LinJ31_V3.2250 | <i>L. infantum</i> | 128 | 405  | 532  |
| LinJ31_V3.2250 | <i>L. infantum</i> | 187 | 534  | 720  |
| LinJ31_V3.2260 | <i>L. infantum</i> | 42  | 1    | 42   |
| LinJ31_V3.2260 | <i>L. infantum</i> | 68  | 54   | 121  |
| LinJ31_V3.2260 | <i>L. infantum</i> | 291 | 145  | 435  |
| LinJ31_V3.2260 | <i>L. infantum</i> | 78  | 464  | 541  |
| LinJ31_V3.2260 | <i>L. infantum</i> | 40  | 548  | 587  |
| LinJ31_V3.2270 | <i>L. infantum</i> | 117 | 1    | 117  |
| LinJ31_V3.2270 | <i>L. infantum</i> | 67  | 156  | 222  |
| LinJ31_V3.2270 | <i>L. infantum</i> | 75  | 255  | 329  |
| LinJ31_V3.2270 | <i>L. infantum</i> | 69  | 360  | 428  |
| LinJ31_V3.2280 | <i>L. infantum</i> | 196 | 1    | 196  |
| LinJ31_V3.2280 | <i>L. infantum</i> | 157 | 224  | 380  |
| LinJ31_V3.2280 | <i>L. infantum</i> | 78  | 405  | 482  |
| LinJ31_V3.2280 | <i>L. infantum</i> | 196 | 593  | 788  |
| LinJ31_V3.2290 | <i>L. infantum</i> | 253 | 1    | 253  |
| LinJ31_V3.2290 | <i>L. infantum</i> | 113 | 320  | 432  |
| LinJ31_V3.2290 | <i>L. infantum</i> | 106 | 443  | 548  |
| LinJ31_V3.2290 | <i>L. infantum</i> | 67  | 598  | 664  |
| LinJ31_V3.2290 | <i>L. infantum</i> | 45  | 679  | 723  |

|                |                    |     |      |      |
|----------------|--------------------|-----|------|------|
| LinJ31_V3.2290 | <i>L. infantum</i> | 113 | 742  | 854  |
| LinJ31_V3.2290 | <i>L. infantum</i> | 138 | 881  | 1018 |
| LinJ31_V3.2290 | <i>L. infantum</i> | 662 | 1069 | 1730 |
| LinJ31_V3.2290 | <i>L. infantum</i> | 226 | 1740 | 1965 |
| LinJ31_V3.2290 | <i>L. infantum</i> | 63  | 1984 | 2046 |
| LinJ31_V3.2290 | <i>L. infantum</i> | 159 | 2126 | 2284 |
| LinJ31_V3.2290 | <i>L. infantum</i> | 76  | 2292 | 2367 |
| LinJ31_V3.2300 | <i>L. infantum</i> | 41  | 1    | 41   |
| LinJ31_V3.2300 | <i>L. infantum</i> | 104 | 48   | 151  |
| LinJ31_V3.2300 | <i>L. infantum</i> | 151 | 156  | 306  |
| LinJ31_V3.2300 | <i>L. infantum</i> | 101 | 346  | 446  |
| LinJ31_V3.2310 | <i>L. infantum</i> | 87  | 66   | 152  |
| LinJ31_V3.2320 | <i>L. infantum</i> | 83  | 1    | 83   |
| LinJ31_V3.2320 | <i>L. infantum</i> | 79  | 264  | 342  |
| LinJ31_V3.2330 | <i>L. infantum</i> | 56  | 126  | 181  |
| LinJ31_V3.2330 | <i>L. infantum</i> | 44  | 502  | 545  |
| LinJ31_V3.2340 | <i>L. infantum</i> | 81  | 1    | 81   |
| LinJ31_V3.2340 | <i>L. infantum</i> | 42  | 84   | 125  |
| LinJ31_V3.2340 | <i>L. infantum</i> | 42  | 84   | 125  |
| LinJ31_V3.2390 | <i>L. infantum</i> | 61  | 1    | 61   |
| LinJ31_V3.2390 | <i>L. infantum</i> | 48  | 305  | 352  |
| LinJ31_V3.2390 | <i>L. infantum</i> | 224 | 510  | 733  |
| LinJ31_V3.2390 | <i>L. infantum</i> | 61  | 838  | 898  |
| LinJ31_V3.2400 | <i>L. infantum</i> | 50  | 40   | 89   |
| LinJ31_V3.2410 | <i>L. infantum</i> | 41  | 1    | 41   |
| LinJ31_V3.2430 | <i>L. infantum</i> | 93  | 1    | 93   |
| LinJ31_V3.2430 | <i>L. infantum</i> | 52  | 248  | 299  |
| LinJ31_V3.2430 | <i>L. infantum</i> | 59  | 551  | 609  |
| LinJ31_V3.2430 | <i>L. infantum</i> | 43  | 652  | 694  |
| LinJ31_V3.2430 | <i>L. infantum</i> | 41  | 760  | 800  |
| LinJ31_V3.2430 | <i>L. infantum</i> | 40  | 891  | 930  |
| LinJ31_V3.2430 | <i>L. infantum</i> | 59  | 1383 | 1441 |
| LinJ31_V3.2440 | <i>L. infantum</i> | 46  | 1    | 46   |
| LinJ31_V3.2440 | <i>L. infantum</i> | 150 | 104  | 253  |
| LinJ31_V3.2440 | <i>L. infantum</i> | 206 | 278  | 483  |
| LinJ31_V3.2450 | <i>L. infantum</i> | 117 | 1    | 117  |
| LinJ31_V3.2460 | <i>L. infantum</i> | 105 | 1    | 105  |
| LinJ31_V3.2460 | <i>L. infantum</i> | 78  | 136  | 213  |
| LinJ31_V3.2460 | <i>L. infantum</i> | 429 | 243  | 671  |
| LinJ31_V3.2460 | <i>L. infantum</i> | 107 | 703  | 809  |
| LinJ31_V3.2470 | <i>L. infantum</i> | 68  | 205  | 272  |
| LinJ31_V3.2480 | <i>L. infantum</i> | 301 | 54   | 354  |
| LinJ31_V3.2480 | <i>L. infantum</i> | 97  | 387  | 483  |
| LinJ31_V3.2480 | <i>L. infantum</i> | 114 | 526  | 639  |
| LinJ31_V3.2480 | <i>L. infantum</i> | 105 | 705  | 809  |
| LinJ31_V3.2480 | <i>L. infantum</i> | 51  | 901  | 951  |
| LinJ31_V3.2480 | <i>L. infantum</i> | 73  | 1056 | 1128 |

|                |                    |     |      |      |
|----------------|--------------------|-----|------|------|
| LinJ31_V3.2480 | <i>L. infantum</i> | 71  | 1156 | 1226 |
| LinJ31_V3.2490 | <i>L. infantum</i> | 141 | 1    | 141  |
| LinJ31_V3.2520 | <i>L. infantum</i> | 43  | 105  | 147  |
| LinJ31_V3.2550 | <i>L. infantum</i> | 56  | 86   | 141  |
| LinJ31_V3.2550 | <i>L. infantum</i> | 45  | 270  | 314  |
| LinJ31_V3.2550 | <i>L. infantum</i> | 80  | 329  | 408  |
| LinJ31_V3.2570 | <i>L. infantum</i> | 68  | 1    | 68   |
| LinJ31_V3.2590 | <i>L. infantum</i> | 58  | 84   | 141  |
| LinJ31_V3.2600 | <i>L. infantum</i> | 76  | 1    | 76   |
| LinJ31_V3.2610 | <i>L. infantum</i> | 99  | 544  | 642  |
| LinJ31_V3.2610 | <i>L. infantum</i> | 49  | 757  | 805  |
| LinJ31_V3.2610 | <i>L. infantum</i> | 49  | 757  | 805  |
| LinJ31_V3.2620 | <i>L. infantum</i> | 52  | 46   | 97   |
| LinJ31_V3.2620 | <i>L. infantum</i> | 170 | 542  | 711  |
| LinJ31_V3.2620 | <i>L. infantum</i> | 69  | 720  | 788  |
| LinJ31_V3.2630 | <i>L. infantum</i> | 67  | 47   | 113  |
| LinJ31_V3.2630 | <i>L. infantum</i> | 246 | 515  | 760  |
| LinJ31_V3.2630 | <i>L. infantum</i> | 74  | 810  | 883  |
| LinJ31_V3.2640 | <i>L. infantum</i> | 186 | 114  | 299  |
| LinJ31_V3.2640 | <i>L. infantum</i> | 281 | 551  | 831  |
| LinJ31_V3.2640 | <i>L. infantum</i> | 66  | 837  | 902  |
| LinJ31_V3.2640 | <i>L. infantum</i> | 146 | 908  | 1053 |
| LinJ31_V3.2640 | <i>L. infantum</i> | 42  | 1070 | 1111 |
| LinJ31_V3.2660 | <i>L. infantum</i> | 49  | 87   | 135  |
| LinJ31_V3.2660 | <i>L. infantum</i> | 86  | 613  | 698  |
| LinJ31_V3.2670 | <i>L. infantum</i> | 74  | 195  | 268  |
| LinJ31_V3.2670 | <i>L. infantum</i> | 50  | 351  | 400  |
| LinJ31_V3.2680 | <i>L. infantum</i> | 42  | 675  | 716  |
| LinJ31_V3.2680 | <i>L. infantum</i> | 74  | 870  | 943  |
| LinJ31_V3.2680 | <i>L. infantum</i> | 51  | 1463 | 1513 |
| LinJ31_V3.2680 | <i>L. infantum</i> | 121 | 1542 | 1662 |
| LinJ31_V3.2690 | <i>L. infantum</i> | 79  | 1    | 79   |
| LinJ31_V3.2700 | <i>L. infantum</i> | 73  | 21   | 93   |
| LinJ31_V3.2730 | <i>L. infantum</i> | 577 | 1    | 577  |
| LinJ31_V3.2750 | <i>L. infantum</i> | 174 | 67   | 240  |
| LinJ31_V3.2750 | <i>L. infantum</i> | 93  | 277  | 369  |
| LinJ31_V3.2750 | <i>L. infantum</i> | 72  | 399  | 470  |
| LinJ31_V3.2750 | <i>L. infantum</i> | 103 | 496  | 598  |
| LinJ31_V3.2750 | <i>L. infantum</i> | 77  | 611  | 687  |
| LinJ31_V3.2760 | <i>L. infantum</i> | 42  | 149  | 190  |
| LinJ31_V3.2770 | <i>L. infantum</i> | 94  | 309  | 402  |
| LinJ31_V3.2770 | <i>L. infantum</i> | 46  | 439  | 484  |
| LinJ31_V3.2770 | <i>L. infantum</i> | 76  | 655  | 730  |
| LinJ31_V3.2770 | <i>L. infantum</i> | 51  | 750  | 800  |
| LinJ31_V3.2770 | <i>L. infantum</i> | 45  | 984  | 1028 |
| LinJ31_V3.2770 | <i>L. infantum</i> | 50  | 1035 | 1084 |
| LinJ31_V3.2770 | <i>L. infantum</i> | 51  | 1205 | 1255 |

|                |                    |     |      |      |
|----------------|--------------------|-----|------|------|
| LinJ31_V3.2780 | <i>L. infantum</i> | 54  | 630  | 683  |
| LinJ31_V3.2780 | <i>L. infantum</i> | 52  | 778  | 829  |
| LinJ31_V3.2780 | <i>L. infantum</i> | 52  | 778  | 829  |
| LinJ31_V3.2790 | <i>L. infantum</i> | 45  | 1    | 45   |
| LinJ31_V3.2790 | <i>L. infantum</i> | 148 | 264  | 411  |
| LinJ31_V3.2790 | <i>L. infantum</i> | 73  | 415  | 487  |
| LinJ31_V3.2790 | <i>L. infantum</i> | 228 | 489  | 716  |
| LinJ31_V3.2810 | <i>L. infantum</i> | 54  | 18   | 71   |
| LinJ31_V3.2810 | <i>L. infantum</i> | 45  | 105  | 149  |
| LinJ31_V3.2810 | <i>L. infantum</i> | 45  | 105  | 149  |
| LinJ31_V3.2840 | <i>L. infantum</i> | 145 | 1    | 145  |
| LinJ31_V3.2840 | <i>L. infantum</i> | 157 | 236  | 392  |
| LinJ31_V3.2850 | <i>L. infantum</i> | 783 | 1    | 783  |
| LinJ31_V3.2850 | <i>L. infantum</i> | 131 | 791  | 921  |
| LinJ31_V3.2850 | <i>L. infantum</i> | 234 | 953  | 1186 |
| LinJ31_V3.2860 | <i>L. infantum</i> | 89  | 117  | 205  |
| LinJ31_V3.2860 | <i>L. infantum</i> | 82  | 232  | 313  |
| LinJ31_V3.2870 | <i>L. infantum</i> | 237 | 1    | 237  |
| LinJ31_V3.2900 | <i>L. infantum</i> | 147 | 24   | 170  |
| LinJ31_V3.2910 | <i>L. infantum</i> | 104 | 49   | 152  |
| LinJ31_V3.2910 | <i>L. infantum</i> | 49  | 231  | 279  |
| LinJ31_V3.2920 | <i>L. infantum</i> | 51  | 220  | 270  |
| LinJ31_V3.2930 | <i>L. infantum</i> | 224 | 1    | 224  |
| LinJ31_V3.2930 | <i>L. infantum</i> | 251 | 374  | 624  |
| LinJ31_V3.2940 | <i>L. infantum</i> | 51  | 1    | 51   |
| LinJ31_V3.2950 | <i>L. infantum</i> | 76  | 70   | 145  |
| LinJ31_V3.2960 | <i>L. infantum</i> | 132 | 1    | 132  |
| LinJ31_V3.2960 | <i>L. infantum</i> | 77  | 135  | 211  |
| LinJ31_V3.2960 | <i>L. infantum</i> | 55  | 253  | 307  |
| LinJ31_V3.2960 | <i>L. infantum</i> | 40  | 637  | 676  |
| LinJ31_V3.2980 | <i>L. infantum</i> | 47  | 1    | 47   |
| LinJ31_V3.2990 | <i>L. infantum</i> | 102 | 122  | 223  |
| LinJ31_V3.2990 | <i>L. infantum</i> | 51  | 1190 | 1240 |
| LinJ31_V3.2990 | <i>L. infantum</i> | 51  | 1190 | 1240 |
| LinJ31_V3.3000 | <i>L. infantum</i> | 165 | 1    | 165  |
| LinJ31_V3.3000 | <i>L. infantum</i> | 88  | 312  | 399  |
| LinJ31_V3.3000 | <i>L. infantum</i> | 88  | 312  | 399  |
| LinJ31_V3.3020 | <i>L. infantum</i> | 166 | 82   | 247  |
| LinJ31_V3.3060 | <i>L. infantum</i> | 41  | 1    | 41   |
| LinJ31_V3.3080 | <i>L. infantum</i> | 86  | 1324 | 1409 |
| LinJ31_V3.3090 | <i>L. infantum</i> | 44  | 705  | 748  |
| LinJ31_V3.3090 | <i>L. infantum</i> | 55  | 757  | 811  |
| LinJ31_V3.3090 | <i>L. infantum</i> | 171 | 819  | 989  |
| LinJ31_V3.3100 | <i>L. infantum</i> | 63  | 1    | 63   |
| LinJ31_V3.3100 | <i>L. infantum</i> | 70  | 136  | 205  |
| LinJ31_V3.3100 | <i>L. infantum</i> | 91  | 223  | 313  |
| LinJ31_V3.3100 | <i>L. infantum</i> | 60  | 317  | 376  |

|                |                    |     |      |      |
|----------------|--------------------|-----|------|------|
| LinJ31_V3.3100 | <i>L. infantum</i> | 42  | 453  | 494  |
| LinJ31_V3.3100 | <i>L. infantum</i> | 111 | 517  | 627  |
| LinJ31_V3.3100 | <i>L. infantum</i> | 96  | 741  | 836  |
| LinJ31_V3.3100 | <i>L. infantum</i> | 43  | 918  | 960  |
| LinJ31_V3.3100 | <i>L. infantum</i> | 184 | 999  | 1182 |
| LinJ31_V3.3100 | <i>L. infantum</i> | 84  | 1211 | 1294 |
| LinJ31_V3.3100 | <i>L. infantum</i> | 102 | 1355 | 1456 |
| LinJ31_V3.3100 | <i>L. infantum</i> | 207 | 1511 | 1717 |
| LinJ31_V3.3100 | <i>L. infantum</i> | 171 | 1783 | 1953 |
| LinJ31_V3.3110 | <i>L. infantum</i> | 57  | 156  | 212  |
| LinJ31_V3.3110 | <i>L. infantum</i> | 255 | 313  | 567  |
| LinJ31_V3.3110 | <i>L. infantum</i> | 175 | 683  | 857  |
| LinJ31_V3.3110 | <i>L. infantum</i> | 42  | 895  | 936  |
| LinJ31_V3.3120 | <i>L. infantum</i> | 107 | 57   | 163  |
| LinJ31_V3.3120 | <i>L. infantum</i> | 83  | 193  | 275  |
| LinJ31_V3.3120 | <i>L. infantum</i> | 108 | 350  | 457  |
| LinJ31_V3.3130 | <i>L. infantum</i> | 161 | 72   | 232  |
| LinJ31_V3.3130 | <i>L. infantum</i> | 149 | 308  | 456  |
| LinJ31_V3.3140 | <i>L. infantum</i> | 117 | 56   | 172  |
| LinJ31_V3.3140 | <i>L. infantum</i> | 645 | 213  | 857  |
| LinJ31_V3.3140 | <i>L. infantum</i> | 90  | 890  | 979  |
| LinJ31_V3.3140 | <i>L. infantum</i> | 382 | 1013 | 1394 |
| LinJ31_V3.3140 | <i>L. infantum</i> | 364 | 1404 | 1767 |
| LinJ31_V3.3160 | <i>L. infantum</i> | 78  | 1    | 78   |
| LinJ31_V3.3160 | <i>L. infantum</i> | 97  | 152  | 248  |
| LinJ31_V3.3180 | <i>L. infantum</i> | 99  | 161  | 259  |
| LinJ31_V3.3190 | <i>L. infantum</i> | 99  | 161  | 259  |
| LinJ31_V3.3200 | <i>L. infantum</i> | 46  | 111  | 156  |
| LinJ31_V3.3210 | <i>L. infantum</i> | 61  | 494  | 554  |
| LinJ31_V3.3210 | <i>L. infantum</i> | 46  | 1059 | 1104 |
| LinJ31_V3.3220 | <i>L. infantum</i> | 50  | 168  | 217  |
| LinJ31_V3.3230 | <i>L. infantum</i> | 52  | 1    | 52   |
| LinJ31_V3.3240 | <i>L. infantum</i> | 846 | 1    | 846  |
| LinJ31_V3.3250 | <i>L. infantum</i> | 48  | 535  | 582  |
| LinJ31_V3.3270 | <i>L. infantum</i> | 45  | 383  | 427  |
| LinJ31_V3.3290 | <i>L. infantum</i> | 52  | 654  | 705  |
| LinJ31_V3.3290 | <i>L. infantum</i> | 91  | 968  | 1058 |
| LinJ31_V3.3290 | <i>L. infantum</i> | 140 | 1069 | 1208 |
| LinJ31_V3.3290 | <i>L. infantum</i> | 57  | 1413 | 1469 |
| LinJ31_V3.3310 | <i>L. infantum</i> | 40  | 323  | 362  |
| LinJ31_V3.3320 | <i>L. infantum</i> | 49  | 1    | 49   |
| LinJ31_V3.3330 | <i>L. infantum</i> | 85  | 1    | 85   |
| LinJ31_V3.3330 | <i>L. infantum</i> | 49  | 136  | 184  |
| LinJ31_V3.3330 | <i>L. infantum</i> | 49  | 136  | 184  |
| LinJ31_V3.3340 | <i>L. infantum</i> | 41  | 160  | 200  |
| LinJ31_V3.3340 | <i>L. infantum</i> | 99  | 562  | 660  |
| LinJ31_V3.3340 | <i>L. infantum</i> | 49  | 775  | 823  |

|                |                    |     |     |      |
|----------------|--------------------|-----|-----|------|
| LinJ31_V3.3350 | <i>L. infantum</i> | 99  | 208 | 306  |
| LinJ31_V3.3350 | <i>L. infantum</i> | 47  | 421 | 467  |
| LinJ31_V3.3350 | <i>L. infantum</i> | 47  | 421 | 467  |
| LinJ31_V3.3360 | <i>L. infantum</i> | 67  | 56  | 122  |
| LinJ31_V3.3360 | <i>L. infantum</i> | 72  | 321 | 392  |
| LinJ31_V3.3360 | <i>L. infantum</i> | 42  | 531 | 572  |
| LinJ31_V3.3360 | <i>L. infantum</i> | 112 | 687 | 798  |
| LinJ31_V3.3370 | <i>L. infantum</i> | 51  | 1   | 51   |
| LinJ31_V3.3370 | <i>L. infantum</i> | 66  | 100 | 165  |
| LinJ31_V3.3370 | <i>L. infantum</i> | 66  | 100 | 165  |
| LinJ31_V3.3380 | <i>L. infantum</i> | 79  | 63  | 141  |
| LinJ31_V3.3380 | <i>L. infantum</i> | 55  | 486 | 540  |
| LinJ31_V3.3390 | <i>L. infantum</i> | 55  | 325 | 379  |
| LinJ31_V3.3400 | <i>L. infantum</i> | 54  | 1   | 54   |
| LinJ31_V3.3400 | <i>L. infantum</i> | 79  | 102 | 180  |
| LinJ31_V3.3400 | <i>L. infantum</i> | 56  | 525 | 580  |
| LinJ32_V3.0020 | <i>L. infantum</i> | 40  | 1   | 40   |
| LinJ32_V3.0020 | <i>L. infantum</i> | 64  | 52  | 115  |
| LinJ32_V3.0020 | <i>L. infantum</i> | 112 | 203 | 314  |
| LinJ32_V3.0020 | <i>L. infantum</i> | 81  | 328 | 408  |
| LinJ32_V3.0020 | <i>L. infantum</i> | 54  | 441 | 494  |
| LinJ32_V3.0030 | <i>L. infantum</i> | 92  | 243 | 334  |
| LinJ32_V3.0040 | <i>L. infantum</i> | 125 | 218 | 342  |
| LinJ32_V3.0060 | <i>L. infantum</i> | 84  | 1   | 84   |
| LinJ32_V3.0060 | <i>L. infantum</i> | 71  | 257 | 327  |
| LinJ32_V3.0060 | <i>L. infantum</i> | 71  | 257 | 327  |
| LinJ32_V3.0070 | <i>L. infantum</i> | 156 | 1   | 156  |
| LinJ32_V3.0080 | <i>L. infantum</i> | 48  | 1   | 48   |
| LinJ32_V3.0090 | <i>L. infantum</i> | 101 | 130 | 230  |
| LinJ32_V3.0120 | <i>L. infantum</i> | 209 | 1   | 209  |
| LinJ32_V3.0120 | <i>L. infantum</i> | 137 | 543 | 679  |
| LinJ32_V3.0120 | <i>L. infantum</i> | 145 | 770 | 914  |
| LinJ32_V3.0120 | <i>L. infantum</i> | 113 | 964 | 1076 |
| LinJ32_V3.0140 | <i>L. infantum</i> | 56  | 53  | 108  |
| LinJ32_V3.0140 | <i>L. infantum</i> | 86  | 114 | 199  |
| LinJ32_V3.0150 | <i>L. infantum</i> | 275 | 1   | 275  |
| LinJ32_V3.0150 | <i>L. infantum</i> | 479 | 407 | 885  |
| LinJ32_V3.0150 | <i>L. infantum</i> | 70  | 929 | 998  |
| LinJ32_V3.0160 | <i>L. infantum</i> | 164 | 1   | 164  |
| LinJ32_V3.0160 | <i>L. infantum</i> | 68  | 199 | 266  |
| LinJ32_V3.0160 | <i>L. infantum</i> | 87  | 300 | 386  |
| LinJ32_V3.0180 | <i>L. infantum</i> | 134 | 175 | 308  |
| LinJ32_V3.0210 | <i>L. infantum</i> | 114 | 70  | 183  |
| LinJ32_V3.0210 | <i>L. infantum</i> | 149 | 192 | 340  |
| LinJ32_V3.0220 | <i>L. infantum</i> | 101 | 421 | 521  |
| LinJ32_V3.0230 | <i>L. infantum</i> | 104 | 95  | 198  |
| LinJ32_V3.0230 | <i>L. infantum</i> | 108 | 316 | 423  |

|                |                    |      |      |      |
|----------------|--------------------|------|------|------|
| LinJ32_V3.0230 | <i>L. infantum</i> | 43   | 581  | 623  |
| LinJ32_V3.0230 | <i>L. infantum</i> | 115  | 735  | 849  |
| LinJ32_V3.0250 | <i>L. infantum</i> | 169  | 417  | 585  |
| LinJ32_V3.0250 | <i>L. infantum</i> | 482  | 605  | 1086 |
| LinJ32_V3.0260 | <i>L. infantum</i> | 244  | 1    | 244  |
| LinJ32_V3.0260 | <i>L. infantum</i> | 54   | 349  | 402  |
| LinJ32_V3.0260 | <i>L. infantum</i> | 70   | 699  | 768  |
| LinJ32_V3.0260 | <i>L. infantum</i> | 66   | 1342 | 1407 |
| LinJ32_V3.0260 | <i>L. infantum</i> | 370  | 1416 | 1785 |
| LinJ32_V3.0270 | <i>L. infantum</i> | 1101 | 260  | 1360 |
| LinJ32_V3.0280 | <i>L. infantum</i> | 57   | 839  | 895  |
| LinJ32_V3.0280 | <i>L. infantum</i> | 121  | 1182 | 1302 |
| LinJ32_V3.0300 | <i>L. infantum</i> | 106  | 115  | 220  |
| LinJ32_V3.0300 | <i>L. infantum</i> | 55   | 233  | 287  |
| LinJ32_V3.0300 | <i>L. infantum</i> | 55   | 233  | 287  |
| LinJ32_V3.0310 | <i>L. infantum</i> | 70   | 1    | 70   |
| LinJ32_V3.0310 | <i>L. infantum</i> | 51   | 113  | 163  |
| LinJ32_V3.0310 | <i>L. infantum</i> | 58   | 460  | 517  |
| LinJ32_V3.0310 | <i>L. infantum</i> | 78   | 580  | 657  |
| LinJ32_V3.0310 | <i>L. infantum</i> | 90   | 673  | 762  |
| LinJ32_V3.0320 | <i>L. infantum</i> | 54   | 596  | 649  |
| LinJ32_V3.0320 | <i>L. infantum</i> | 57   | 726  | 782  |
| LinJ32_V3.0320 | <i>L. infantum</i> | 75   | 1478 | 1552 |
| LinJ32_V3.0340 | <i>L. infantum</i> | 163  | 1    | 163  |
| LinJ32_V3.0340 | <i>L. infantum</i> | 44   | 411  | 454  |
| LinJ32_V3.0340 | <i>L. infantum</i> | 462  | 601  | 1062 |
| LinJ32_V3.0340 | <i>L. infantum</i> | 46   | 1184 | 1229 |
| LinJ32_V3.0340 | <i>L. infantum</i> | 42   | 1279 | 1320 |
| LinJ32_V3.0340 | <i>L. infantum</i> | 185  | 1363 | 1547 |
| LinJ32_V3.0350 | <i>L. infantum</i> | 140  | 1    | 140  |
| LinJ32_V3.0350 | <i>L. infantum</i> | 61   | 154  | 214  |
| LinJ32_V3.0350 | <i>L. infantum</i> | 45   | 254  | 298  |
| LinJ32_V3.0350 | <i>L. infantum</i> | 44   | 382  | 425  |
| LinJ32_V3.0350 | <i>L. infantum</i> | 260  | 540  | 799  |
| LinJ32_V3.0360 | <i>L. infantum</i> | 194  | 33   | 226  |
| LinJ32_V3.0360 | <i>L. infantum</i> | 99   | 368  | 466  |
| LinJ32_V3.0370 | <i>L. infantum</i> | 296  | 1    | 296  |
| LinJ32_V3.0370 | <i>L. infantum</i> | 59   | 308  | 366  |
| LinJ32_V3.0380 | <i>L. infantum</i> | 85   | 1    | 85   |
| LinJ32_V3.0380 | <i>L. infantum</i> | 44   | 176  | 219  |
| LinJ32_V3.0380 | <i>L. infantum</i> | 50   | 521  | 570  |
| LinJ32_V3.0380 | <i>L. infantum</i> | 60   | 902  | 961  |
| LinJ32_V3.0390 | <i>L. infantum</i> | 96   | 1    | 96   |
| LinJ32_V3.0390 | <i>L. infantum</i> | 188  | 129  | 316  |
| LinJ32_V3.0390 | <i>L. infantum</i> | 119  | 343  | 461  |
| LinJ32_V3.0410 | <i>L. infantum</i> | 110  | 1    | 110  |
| LinJ32_V3.0410 | <i>L. infantum</i> | 97   | 518  | 614  |

|                |                    |     |      |      |
|----------------|--------------------|-----|------|------|
| LinJ32_V3.0420 | <i>L. infantum</i> | 59  | 1    | 59   |
| LinJ32_V3.0420 | <i>L. infantum</i> | 57  | 80   | 136  |
| LinJ32_V3.0420 | <i>L. infantum</i> | 81  | 236  | 316  |
| LinJ32_V3.0420 | <i>L. infantum</i> | 43  | 657  | 699  |
| LinJ32_V3.0460 | <i>L. infantum</i> | 47  | 1    | 47   |
| LinJ32_V3.0480 | <i>L. infantum</i> | 144 | 190  | 333  |
| LinJ32_V3.0480 | <i>L. infantum</i> | 129 | 398  | 526  |
| LinJ32_V3.0510 | <i>L. infantum</i> | 68  | 1    | 68   |
| LinJ32_V3.0510 | <i>L. infantum</i> | 48  | 113  | 160  |
| LinJ32_V3.0510 | <i>L. infantum</i> | 84  | 300  | 383  |
| LinJ32_V3.0560 | <i>L. infantum</i> | 106 | 40   | 145  |
| LinJ32_V3.0570 | <i>L. infantum</i> | 64  | 232  | 295  |
| LinJ32_V3.0590 | <i>L. infantum</i> | 46  | 81   | 126  |
| LinJ32_V3.0600 | <i>L. infantum</i> | 106 | 1    | 106  |
| LinJ32_V3.0600 | <i>L. infantum</i> | 74  | 511  | 584  |
| LinJ32_V3.0610 | <i>L. infantum</i> | 153 | 113  | 265  |
| LinJ32_V3.0610 | <i>L. infantum</i> | 172 | 352  | 523  |
| LinJ32_V3.0620 | <i>L. infantum</i> | 78  | 93   | 170  |
| LinJ32_V3.0620 | <i>L. infantum</i> | 45  | 225  | 269  |
| LinJ32_V3.0630 | <i>L. infantum</i> | 85  | 370  | 454  |
| LinJ32_V3.0630 | <i>L. infantum</i> | 43  | 516  | 558  |
| LinJ32_V3.0640 | <i>L. infantum</i> | 48  | 160  | 207  |
| LinJ32_V3.0650 | <i>L. infantum</i> | 230 | 1    | 230  |
| LinJ32_V3.0670 | <i>L. infantum</i> | 60  | 1    | 60   |
| LinJ32_V3.0670 | <i>L. infantum</i> | 107 | 498  | 604  |
| LinJ32_V3.0680 | <i>L. infantum</i> | 56  | 32   | 87   |
| LinJ32_V3.0690 | <i>L. infantum</i> | 52  | 1    | 52   |
| LinJ32_V3.0690 | <i>L. infantum</i> | 47  | 119  | 165  |
| LinJ32_V3.0690 | <i>L. infantum</i> | 47  | 119  | 165  |
| LinJ32_V3.0700 | <i>L. infantum</i> | 48  | 197  | 244  |
| LinJ32_V3.0710 | <i>L. infantum</i> | 130 | 335  | 464  |
| LinJ32_V3.0710 | <i>L. infantum</i> | 166 | 515  | 680  |
| LinJ32_V3.0710 | <i>L. infantum</i> | 312 | 806  | 1117 |
| LinJ32_V3.0720 | <i>L. infantum</i> | 62  | 1    | 62   |
| LinJ32_V3.0730 | <i>L. infantum</i> | 89  | 146  | 234  |
| LinJ32_V3.0760 | <i>L. infantum</i> | 112 | 1    | 112  |
| LinJ32_V3.0770 | <i>L. infantum</i> | 206 | 273  | 478  |
| LinJ32_V3.0770 | <i>L. infantum</i> | 44  | 554  | 597  |
| LinJ32_V3.0790 | <i>L. infantum</i> | 60  | 1    | 60   |
| LinJ32_V3.0810 | <i>L. infantum</i> | 163 | 203  | 365  |
| LinJ32_V3.0810 | <i>L. infantum</i> | 48  | 524  | 571  |
| LinJ32_V3.0810 | <i>L. infantum</i> | 101 | 964  | 1064 |
| LinJ32_V3.0810 | <i>L. infantum</i> | 71  | 1295 | 1365 |
| LinJ32_V3.0820 | <i>L. infantum</i> | 95  | 91   | 185  |
| LinJ32_V3.0820 | <i>L. infantum</i> | 70  | 517  | 586  |
| LinJ32_V3.0820 | <i>L. infantum</i> | 177 | 588  | 764  |
| LinJ32_V3.0850 | <i>L. infantum</i> | 84  | 134  | 217  |



|                |                    |     |      |      |
|----------------|--------------------|-----|------|------|
| LinJ32_V3.0850 | <i>L. infantum</i> | 80  | 297  | 376  |
| LinJ32_V3.0850 | <i>L. infantum</i> | 80  | 297  | 376  |
| LinJ32_V3.0860 | <i>L. infantum</i> | 96  | 1    | 96   |
| LinJ32_V3.0860 | <i>L. infantum</i> | 169 | 907  | 1075 |
| LinJ32_V3.0880 | <i>L. infantum</i> | 268 | 200  | 467  |
| LinJ32_V3.0890 | <i>L. infantum</i> | 291 | 1    | 291  |
| LinJ32_V3.0900 | <i>L. infantum</i> | 177 | 34   | 210  |
| LinJ32_V3.0900 | <i>L. infantum</i> | 175 | 282  | 456  |
| LinJ32_V3.0900 | <i>L. infantum</i> | 110 | 649  | 758  |
| LinJ32_V3.0910 | <i>L. infantum</i> | 44  | 288  | 331  |
| LinJ32_V3.0910 | <i>L. infantum</i> | 52  | 488  | 539  |
| LinJ32_V3.0910 | <i>L. infantum</i> | 52  | 488  | 539  |
| LinJ32_V3.0920 | <i>L. infantum</i> | 42  | 132  | 173  |
| LinJ32_V3.0950 | <i>L. infantum</i> | 82  | 52   | 133  |
| LinJ32_V3.0970 | <i>L. infantum</i> | 53  | 706  | 758  |
| LinJ32_V3.0980 | <i>L. infantum</i> | 53  | 547  | 599  |
| LinJ32_V3.0980 | <i>L. infantum</i> | 72  | 633  | 704  |
| LinJ32_V3.0980 | <i>L. infantum</i> | 72  | 633  | 704  |
| LinJ32_V3.0990 | <i>L. infantum</i> | 150 | 248  | 397  |
| LinJ32_V3.0990 | <i>L. infantum</i> | 171 | 656  | 826  |
| LinJ32_V3.1000 | <i>L. infantum</i> | 59  | 108  | 166  |
| LinJ32_V3.1000 | <i>L. infantum</i> | 46  | 307  | 352  |
| LinJ32_V3.1000 | <i>L. infantum</i> | 46  | 307  | 352  |
| LinJ32_V3.1010 | <i>L. infantum</i> | 101 | 148  | 248  |
| LinJ32_V3.1020 | <i>L. infantum</i> | 40  | 163  | 202  |
| LinJ32_V3.1020 | <i>L. infantum</i> | 95  | 449  | 543  |
| LinJ32_V3.1020 | <i>L. infantum</i> | 61  | 609  | 669  |
| LinJ32_V3.1020 | <i>L. infantum</i> | 77  | 712  | 788  |
| LinJ32_V3.1020 | <i>L. infantum</i> | 75  | 975  | 1049 |
| LinJ32_V3.1020 | <i>L. infantum</i> | 41  | 1129 | 1169 |
| LinJ32_V3.1020 | <i>L. infantum</i> | 50  | 1243 | 1292 |
| LinJ32_V3.1020 | <i>L. infantum</i> | 165 | 1345 | 1509 |
| LinJ32_V3.1020 | <i>L. infantum</i> | 75  | 1519 | 1593 |
| LinJ32_V3.1020 | <i>L. infantum</i> | 95  | 1599 | 1693 |
| LinJ32_V3.1020 | <i>L. infantum</i> | 132 | 1706 | 1837 |
| LinJ32_V3.1030 | <i>L. infantum</i> | 63  | 22   | 84   |
| LinJ32_V3.1030 | <i>L. infantum</i> | 63  | 96   | 158  |
| LinJ32_V3.1030 | <i>L. infantum</i> | 92  | 284  | 375  |
| LinJ32_V3.1030 | <i>L. infantum</i> | 53  | 430  | 482  |
| LinJ32_V3.1040 | <i>L. infantum</i> | 48  | 164  | 211  |
| LinJ32_V3.1040 | <i>L. infantum</i> | 50  | 216  | 265  |
| LinJ32_V3.1040 | <i>L. infantum</i> | 53  | 331  | 383  |
| LinJ32_V3.1050 | <i>L. infantum</i> | 48  | 659  | 706  |
| LinJ32_V3.1060 | <i>L. infantum</i> | 50  | 230  | 279  |
| LinJ32_V3.1070 | <i>L. infantum</i> | 149 | 193  | 341  |
| LinJ32_V3.1080 | <i>L. infantum</i> | 43  | 57   | 99   |
| LinJ32_V3.1080 | <i>L. infantum</i> | 203 | 165  | 367  |

|                |                    |     |      |      |
|----------------|--------------------|-----|------|------|
| LinJ32_V3.1080 | <i>L. infantum</i> | 72  | 476  | 547  |
| LinJ32_V3.1080 | <i>L. infantum</i> | 40  | 747  | 786  |
| LinJ32_V3.1100 | <i>L. infantum</i> | 114 | 1    | 114  |
| LinJ32_V3.1100 | <i>L. infantum</i> | 73  | 149  | 221  |
| LinJ32_V3.1100 | <i>L. infantum</i> | 95  | 260  | 354  |
| LinJ32_V3.1100 | <i>L. infantum</i> | 91  | 398  | 488  |
| LinJ32_V3.1120 | <i>L. infantum</i> | 54  | 32   | 85   |
| LinJ32_V3.1120 | <i>L. infantum</i> | 78  | 509  | 586  |
| LinJ32_V3.1150 | <i>L. infantum</i> | 52  | 297  | 348  |
| LinJ32_V3.1150 | <i>L. infantum</i> | 77  | 366  | 442  |
| LinJ32_V3.1150 | <i>L. infantum</i> | 107 | 830  | 936  |
| LinJ32_V3.1150 | <i>L. infantum</i> | 64  | 957  | 1020 |
| LinJ32_V3.1190 | <i>L. infantum</i> | 949 | 1    | 949  |
| LinJ32_V3.1190 | <i>L. infantum</i> | 232 | 968  | 1199 |
| LinJ32_V3.1190 | <i>L. infantum</i> | 188 | 1201 | 1388 |
| LinJ32_V3.1190 | <i>L. infantum</i> | 202 | 1406 | 1607 |
| LinJ32_V3.1200 | <i>L. infantum</i> | 109 | 1    | 109  |
| LinJ32_V3.1200 | <i>L. infantum</i> | 44  | 266  | 309  |
| LinJ32_V3.1200 | <i>L. infantum</i> | 49  | 428  | 476  |
| LinJ32_V3.1210 | <i>L. infantum</i> | 43  | 179  | 221  |
| LinJ32_V3.1220 | <i>L. infantum</i> | 74  | 308  | 381  |
| LinJ32_V3.1230 | <i>L. infantum</i> | 82  | 226  | 307  |
| LinJ32_V3.1240 | <i>L. infantum</i> | 113 | 153  | 265  |
| LinJ32_V3.1240 | <i>L. infantum</i> | 255 | 406  | 660  |
| LinJ32_V3.1250 | <i>L. infantum</i> | 281 | 19   | 299  |
| LinJ32_V3.1250 | <i>L. infantum</i> | 64  | 325  | 388  |
| LinJ32_V3.1250 | <i>L. infantum</i> | 128 | 413  | 540  |
| LinJ32_V3.1270 | <i>L. infantum</i> | 43  | 1    | 43   |
| LinJ32_V3.1270 | <i>L. infantum</i> | 54  | 367  | 420  |
| LinJ32_V3.1270 | <i>L. infantum</i> | 54  | 367  | 420  |
| LinJ32_V3.1280 | <i>L. infantum</i> | 151 | 399  | 549  |
| LinJ32_V3.1280 | <i>L. infantum</i> | 106 | 583  | 688  |
| LinJ32_V3.1280 | <i>L. infantum</i> | 85  | 713  | 797  |
| LinJ32_V3.1290 | <i>L. infantum</i> | 48  | 144  | 191  |
| LinJ32_V3.1290 | <i>L. infantum</i> | 160 | 244  | 403  |
| LinJ32_V3.1300 | <i>L. infantum</i> | 53  | 112  | 164  |
| LinJ32_V3.1300 | <i>L. infantum</i> | 78  | 461  | 538  |
| LinJ32_V3.1300 | <i>L. infantum</i> | 44  | 881  | 924  |
| LinJ32_V3.1310 | <i>L. infantum</i> | 66  | 1    | 66   |
| LinJ32_V3.1310 | <i>L. infantum</i> | 51  | 74   | 124  |
| LinJ32_V3.1310 | <i>L. infantum</i> | 112 | 195  | 306  |
| LinJ32_V3.1320 | <i>L. infantum</i> | 41  | 397  | 437  |
| LinJ32_V3.1330 | <i>L. infantum</i> | 71  | 1    | 71   |
| LinJ32_V3.1330 | <i>L. infantum</i> | 171 | 181  | 351  |
| LinJ32_V3.1330 | <i>L. infantum</i> | 49  | 592  | 640  |
| LinJ32_V3.1350 | <i>L. infantum</i> | 123 | 31   | 153  |
| LinJ32_V3.1350 | <i>L. infantum</i> | 50  | 281  | 330  |

|                |                    |     |      |      |
|----------------|--------------------|-----|------|------|
| LinJ32_V3.1350 | <i>L. infantum</i> | 50  | 281  | 330  |
| LinJ32_V3.1360 | <i>L. infantum</i> | 68  | 1    | 68   |
| LinJ32_V3.1370 | <i>L. infantum</i> | 272 | 111  | 382  |
| LinJ32_V3.1380 | <i>L. infantum</i> | 162 | 77   | 238  |
| LinJ32_V3.1380 | <i>L. infantum</i> | 83  | 263  | 345  |
| LinJ32_V3.1380 | <i>L. infantum</i> | 72  | 390  | 461  |
| LinJ32_V3.1380 | <i>L. infantum</i> | 40  | 504  | 543  |
| LinJ32_V3.1390 | <i>L. infantum</i> | 117 | 1    | 117  |
| LinJ32_V3.1400 | <i>L. infantum</i> | 109 | 174  | 282  |
| LinJ32_V3.1400 | <i>L. infantum</i> | 44  | 664  | 707  |
| LinJ32_V3.1410 | <i>L. infantum</i> | 52  | 38   | 89   |
| LinJ32_V3.1420 | <i>L. infantum</i> | 549 | 1    | 549  |
| LinJ32_V3.1430 | <i>L. infantum</i> | 252 | 1    | 252  |
| LinJ32_V3.1430 | <i>L. infantum</i> | 47  | 282  | 328  |
| LinJ32_V3.1440 | <i>L. infantum</i> | 134 | 83   | 216  |
| LinJ32_V3.1450 | <i>L. infantum</i> | 65  | 96   | 160  |
| LinJ32_V3.1450 | <i>L. infantum</i> | 135 | 616  | 750  |
| LinJ32_V3.1460 | <i>L. infantum</i> | 50  | 324  | 373  |
| LinJ32_V3.1460 | <i>L. infantum</i> | 78  | 635  | 712  |
| LinJ32_V3.1460 | <i>L. infantum</i> | 65  | 899  | 963  |
| LinJ32_V3.1460 | <i>L. infantum</i> | 325 | 1132 | 1456 |
| LinJ32_V3.1460 | <i>L. infantum</i> | 163 | 1527 | 1689 |
| LinJ32_V3.1490 | <i>L. infantum</i> | 481 | 1    | 481  |
| LinJ32_V3.1490 | <i>L. infantum</i> | 88  | 809  | 896  |
| LinJ32_V3.1490 | <i>L. infantum</i> | 95  | 902  | 996  |
| LinJ32_V3.1520 | <i>L. infantum</i> | 41  | 1    | 41   |
| LinJ32_V3.1520 | <i>L. infantum</i> | 60  | 206  | 265  |
| LinJ32_V3.1520 | <i>L. infantum</i> | 63  | 701  | 763  |
| LinJ32_V3.1520 | <i>L. infantum</i> | 85  | 868  | 952  |
| LinJ32_V3.1520 | <i>L. infantum</i> | 62  | 1396 | 1457 |
| LinJ32_V3.1520 | <i>L. infantum</i> | 41  | 2214 | 2254 |
| LinJ32_V3.1520 | <i>L. infantum</i> | 44  | 2395 | 2438 |
| LinJ32_V3.1530 | <i>L. infantum</i> | 103 | 120  | 222  |
| LinJ32_V3.1530 | <i>L. infantum</i> | 42  | 227  | 268  |
| LinJ32_V3.1530 | <i>L. infantum</i> | 42  | 227  | 268  |
| LinJ32_V3.1540 | <i>L. infantum</i> | 62  | 189  | 250  |
| LinJ32_V3.1540 | <i>L. infantum</i> | 51  | 422  | 472  |
| LinJ32_V3.1550 | <i>L. infantum</i> | 190 | 1    | 190  |
| LinJ32_V3.1560 | <i>L. infantum</i> | 88  | 36   | 123  |
| LinJ32_V3.1560 | <i>L. infantum</i> | 50  | 141  | 190  |
| LinJ32_V3.1560 | <i>L. infantum</i> | 43  | 203  | 245  |
| LinJ32_V3.1570 | <i>L. infantum</i> | 113 | 1    | 113  |
| LinJ32_V3.1570 | <i>L. infantum</i> | 49  | 162  | 210  |
| LinJ32_V3.1570 | <i>L. infantum</i> | 49  | 414  | 462  |
| LinJ32_V3.1580 | <i>L. infantum</i> | 88  | 172  | 259  |
| LinJ32_V3.1590 | <i>L. infantum</i> | 123 | 106  | 228  |
| LinJ32_V3.1590 | <i>L. infantum</i> | 159 | 544  | 702  |

|                |                    |     |      |      |
|----------------|--------------------|-----|------|------|
| LinJ32_V3.1600 | <i>L. infantum</i> | 86  | 258  | 343  |
| LinJ32_V3.1630 | <i>L. infantum</i> | 97  | 107  | 203  |
| LinJ32_V3.1640 | <i>L. infantum</i> | 86  | 1    | 86   |
| LinJ32_V3.1640 | <i>L. infantum</i> | 46  | 788  | 833  |
| LinJ32_V3.1650 | <i>L. infantum</i> | 82  | 131  | 212  |
| LinJ32_V3.1650 | <i>L. infantum</i> | 491 | 241  | 731  |
| LinJ32_V3.1670 | <i>L. infantum</i> | 102 | 170  | 271  |
| LinJ32_V3.1670 | <i>L. infantum</i> | 49  | 355  | 403  |
| LinJ32_V3.1670 | <i>L. infantum</i> | 89  | 487  | 575  |
| LinJ32_V3.1670 | <i>L. infantum</i> | 48  | 655  | 702  |
| LinJ32_V3.1680 | <i>L. infantum</i> | 117 | 1    | 117  |
| LinJ32_V3.1680 | <i>L. infantum</i> | 132 | 129  | 260  |
| LinJ32_V3.1680 | <i>L. infantum</i> | 302 | 264  | 565  |
| LinJ32_V3.1680 | <i>L. infantum</i> | 53  | 616  | 668  |
| LinJ32_V3.1700 | <i>L. infantum</i> | 49  | 719  | 767  |
| LinJ32_V3.1710 | <i>L. infantum</i> | 90  | 1    | 90   |
| LinJ32_V3.1710 | <i>L. infantum</i> | 128 | 123  | 250  |
| LinJ32_V3.1720 | <i>L. infantum</i> | 50  | 130  | 179  |
| LinJ32_V3.1730 | <i>L. infantum</i> | 208 | 1    | 208  |
| LinJ32_V3.1730 | <i>L. infantum</i> | 161 | 228  | 388  |
| LinJ32_V3.1730 | <i>L. infantum</i> | 67  | 430  | 496  |
| LinJ32_V3.1730 | <i>L. infantum</i> | 49  | 661  | 709  |
| LinJ32_V3.1740 | <i>L. infantum</i> | 370 | 1    | 370  |
| LinJ32_V3.1740 | <i>L. infantum</i> | 104 | 387  | 490  |
| LinJ32_V3.1740 | <i>L. infantum</i> | 300 | 522  | 821  |
| LinJ32_V3.1740 | <i>L. infantum</i> | 93  | 827  | 919  |
| LinJ32_V3.1740 | <i>L. infantum</i> | 42  | 953  | 994  |
| LinJ32_V3.1740 | <i>L. infantum</i> | 78  | 1001 | 1078 |
| LinJ32_V3.1740 | <i>L. infantum</i> | 41  | 1108 | 1148 |
| LinJ32_V3.1770 | <i>L. infantum</i> | 42  | 1    | 42   |
| LinJ32_V3.1770 | <i>L. infantum</i> | 169 | 395  | 563  |
| LinJ32_V3.1780 | <i>L. infantum</i> | 308 | 30   | 337  |
| LinJ32_V3.1780 | <i>L. infantum</i> | 54  | 532  | 585  |
| LinJ32_V3.1780 | <i>L. infantum</i> | 54  | 614  | 667  |
| LinJ32_V3.1780 | <i>L. infantum</i> | 137 | 704  | 840  |
| LinJ32_V3.1790 | <i>L. infantum</i> | 73  | 98   | 170  |
| LinJ32_V3.1790 | <i>L. infantum</i> | 52  | 322  | 373  |
| LinJ32_V3.1790 | <i>L. infantum</i> | 46  | 381  | 426  |
| LinJ32_V3.1790 | <i>L. infantum</i> | 47  | 625  | 671  |
| LinJ32_V3.1800 | <i>L. infantum</i> | 64  | 183  | 246  |
| LinJ32_V3.1800 | <i>L. infantum</i> | 105 | 540  | 644  |
| LinJ32_V3.1800 | <i>L. infantum</i> | 105 | 540  | 644  |
| LinJ32_V3.1820 | <i>L. infantum</i> | 64  | 66   | 129  |
| LinJ32_V3.1830 | <i>L. infantum</i> | 63  | 369  | 431  |
| LinJ32_V3.1830 | <i>L. infantum</i> | 53  | 573  | 625  |
| LinJ32_V3.1830 | <i>L. infantum</i> | 63  | 715  | 777  |
| LinJ32_V3.1840 | <i>L. infantum</i> | 57  | 194  | 250  |

|                |                    |     |      |      |
|----------------|--------------------|-----|------|------|
| LinJ32_V3.1840 | <i>L. infantum</i> | 166 | 307  | 472  |
| LinJ32_V3.1850 | <i>L. infantum</i> | 43  | 29   | 71   |
| LinJ32_V3.1850 | <i>L. infantum</i> | 46  | 452  | 497  |
| LinJ32_V3.1850 | <i>L. infantum</i> | 46  | 452  | 497  |
| LinJ32_V3.1880 | <i>L. infantum</i> | 244 | 1    | 244  |
| LinJ32_V3.1890 | <i>L. infantum</i> | 77  | 40   | 116  |
| LinJ32_V3.1900 | <i>L. infantum</i> | 73  | 51   | 123  |
| LinJ32_V3.1910 | <i>L. infantum</i> | 42  | 11   | 52   |
| LinJ32_V3.1920 | <i>L. infantum</i> | 42  | 11   | 52   |
| LinJ32_V3.1940 | <i>L. infantum</i> | 54  | 541  | 594  |
| LinJ32_V3.1950 | <i>L. infantum</i> | 40  | 200  | 239  |
| LinJ32_V3.1950 | <i>L. infantum</i> | 90  | 262  | 351  |
| LinJ32_V3.1950 | <i>L. infantum</i> | 90  | 262  | 351  |
| LinJ32_V3.1960 | <i>L. infantum</i> | 49  | 173  | 221  |
| LinJ32_V3.1960 | <i>L. infantum</i> | 59  | 377  | 435  |
| LinJ32_V3.1960 | <i>L. infantum</i> | 179 | 447  | 625  |
| LinJ32_V3.1970 | <i>L. infantum</i> | 78  | 1    | 78   |
| LinJ32_V3.1980 | <i>L. infantum</i> | 97  | 1    | 97   |
| LinJ32_V3.1980 | <i>L. infantum</i> | 320 | 131  | 450  |
| LinJ32_V3.2000 | <i>L. infantum</i> | 43  | 584  | 626  |
| LinJ32_V3.2000 | <i>L. infantum</i> | 42  | 961  | 1002 |
| LinJ32_V3.2000 | <i>L. infantum</i> | 49  | 1062 | 1110 |
| LinJ32_V3.2010 | <i>L. infantum</i> | 46  | 131  | 176  |
| LinJ32_V3.2010 | <i>L. infantum</i> | 45  | 180  | 224  |
| LinJ32_V3.2010 | <i>L. infantum</i> | 161 | 288  | 448  |
| LinJ32_V3.2010 | <i>L. infantum</i> | 125 | 481  | 605  |
| LinJ32_V3.2020 | <i>L. infantum</i> | 105 | 336  | 440  |
| LinJ32_V3.2040 | <i>L. infantum</i> | 344 | 1    | 344  |
| LinJ32_V3.2040 | <i>L. infantum</i> | 401 | 382  | 782  |
| LinJ32_V3.2080 | <i>L. infantum</i> | 100 | 1    | 100  |
| LinJ32_V3.2080 | <i>L. infantum</i> | 90  | 111  | 200  |
| LinJ32_V3.2080 | <i>L. infantum</i> | 135 | 206  | 340  |
| LinJ32_V3.2080 | <i>L. infantum</i> | 96  | 357  | 452  |
| LinJ32_V3.2090 | <i>L. infantum</i> | 41  | 1    | 41   |
| LinJ32_V3.2090 | <i>L. infantum</i> | 90  | 208  | 297  |
| LinJ32_V3.2100 | <i>L. infantum</i> | 148 | 1    | 148  |
| LinJ32_V3.2110 | <i>L. infantum</i> | 83  | 103  | 185  |
| LinJ32_V3.2110 | <i>L. infantum</i> | 74  | 231  | 304  |
| LinJ32_V3.2110 | <i>L. infantum</i> | 109 | 385  | 493  |
| LinJ32_V3.2110 | <i>L. infantum</i> | 112 | 502  | 613  |
| LinJ32_V3.2110 | <i>L. infantum</i> | 96  | 636  | 731  |
| LinJ32_V3.2120 | <i>L. infantum</i> | 120 | 1    | 120  |
| LinJ32_V3.2130 | <i>L. infantum</i> | 98  | 272  | 369  |
| LinJ32_V3.2150 | <i>L. infantum</i> | 47  | 75   | 121  |
| LinJ32_V3.2170 | <i>L. infantum</i> | 145 | 1    | 145  |
| LinJ32_V3.2170 | <i>L. infantum</i> | 67  | 175  | 241  |
| LinJ32_V3.2170 | <i>L. infantum</i> | 99  | 492  | 590  |

|                |                    |     |      |      |
|----------------|--------------------|-----|------|------|
| LinJ32_V3.2170 | <i>L. infantum</i> | 148 | 609  | 756  |
| LinJ32_V3.2170 | <i>L. infantum</i> | 42  | 836  | 877  |
| LinJ32_V3.2200 | <i>L. infantum</i> | 41  | 111  | 151  |
| LinJ32_V3.2210 | <i>L. infantum</i> | 86  | 39   | 124  |
| LinJ32_V3.2210 | <i>L. infantum</i> | 76  | 174  | 249  |
| LinJ32_V3.2210 | <i>L. infantum</i> | 45  | 294  | 338  |
| LinJ32_V3.2210 | <i>L. infantum</i> | 60  | 409  | 468  |
| LinJ32_V3.2230 | <i>L. infantum</i> | 49  | 127  | 175  |
| LinJ32_V3.2230 | <i>L. infantum</i> | 339 | 361  | 699  |
| LinJ32_V3.2230 | <i>L. infantum</i> | 60  | 713  | 772  |
| LinJ32_V3.2230 | <i>L. infantum</i> | 181 | 785  | 965  |
| LinJ32_V3.2240 | <i>L. infantum</i> | 97  | 50   | 146  |
| LinJ32_V3.2240 | <i>L. infantum</i> | 134 | 213  | 346  |
| LinJ32_V3.2240 | <i>L. infantum</i> | 156 | 465  | 620  |
| LinJ32_V3.2260 | <i>L. infantum</i> | 120 | 59   | 178  |
| LinJ32_V3.2260 | <i>L. infantum</i> | 164 | 241  | 404  |
| LinJ32_V3.2300 | <i>L. infantum</i> | 121 | 14   | 134  |
| LinJ32_V3.2300 | <i>L. infantum</i> | 55  | 184  | 238  |
| LinJ32_V3.2300 | <i>L. infantum</i> | 66  | 347  | 412  |
| LinJ32_V3.2300 | <i>L. infantum</i> | 48  | 987  | 1034 |
| LinJ32_V3.2310 | <i>L. infantum</i> | 174 | 1132 | 1305 |
| LinJ32_V3.2320 | <i>L. infantum</i> | 183 | 27   | 209  |
| LinJ32_V3.2320 | <i>L. infantum</i> | 45  | 301  | 345  |
| LinJ32_V3.2340 | <i>L. infantum</i> | 371 | 1    | 371  |
| LinJ32_V3.2340 | <i>L. infantum</i> | 68  | 394  | 461  |
| LinJ32_V3.2340 | <i>L. infantum</i> | 116 | 478  | 593  |
| LinJ32_V3.2350 | <i>L. infantum</i> | 99  | 1    | 99   |
| LinJ32_V3.2350 | <i>L. infantum</i> | 44  | 105  | 148  |
| LinJ32_V3.2360 | <i>L. infantum</i> | 64  | 143  | 206  |
| LinJ32_V3.2370 | <i>L. infantum</i> | 903 | 85   | 987  |
| LinJ32_V3.2370 | <i>L. infantum</i> | 180 | 1021 | 1200 |
| LinJ32_V3.2370 | <i>L. infantum</i> | 107 | 1232 | 1338 |
| LinJ32_V3.2370 | <i>L. infantum</i> | 160 | 1395 | 1554 |
| LinJ32_V3.2380 | <i>L. infantum</i> | 197 | 1    | 197  |
| LinJ32_V3.2380 | <i>L. infantum</i> | 89  | 405  | 493  |
| LinJ32_V3.2390 | <i>L. infantum</i> | 49  | 1    | 49   |
| LinJ32_V3.2390 | <i>L. infantum</i> | 82  | 101  | 182  |
| LinJ32_V3.2390 | <i>L. infantum</i> | 149 | 312  | 460  |
| LinJ32_V3.2390 | <i>L. infantum</i> | 56  | 492  | 547  |
| LinJ32_V3.2390 | <i>L. infantum</i> | 102 | 825  | 926  |
| LinJ32_V3.2400 | <i>L. infantum</i> | 68  | 1    | 68   |
| LinJ32_V3.2400 | <i>L. infantum</i> | 80  | 157  | 236  |
| LinJ32_V3.2400 | <i>L. infantum</i> | 42  | 272  | 313  |
| LinJ32_V3.2410 | <i>L. infantum</i> | 74  | 114  | 187  |
| LinJ32_V3.2420 | <i>L. infantum</i> | 47  | 1    | 47   |
| LinJ32_V3.2420 | <i>L. infantum</i> | 740 | 229  | 968  |
| LinJ32_V3.2420 | <i>L. infantum</i> | 153 | 1031 | 1183 |

|                |                    |     |      |      |
|----------------|--------------------|-----|------|------|
| LinJ32_V3.2430 | <i>L. infantum</i> | 55  | 230  | 284  |
| LinJ32_V3.2440 | <i>L. infantum</i> | 45  | 1    | 45   |
| LinJ32_V3.2440 | <i>L. infantum</i> | 87  | 50   | 136  |
| LinJ32_V3.2440 | <i>L. infantum</i> | 40  | 531  | 570  |
| LinJ32_V3.2450 | <i>L. infantum</i> | 158 | 1    | 158  |
| LinJ32_V3.2450 | <i>L. infantum</i> | 76  | 179  | 254  |
| LinJ32_V3.2450 | <i>L. infantum</i> | 171 | 267  | 437  |
| LinJ32_V3.2460 | <i>L. infantum</i> | 47  | 150  | 196  |
| LinJ32_V3.2460 | <i>L. infantum</i> | 70  | 198  | 267  |
| LinJ32_V3.2460 | <i>L. infantum</i> | 54  | 355  | 408  |
| LinJ32_V3.2460 | <i>L. infantum</i> | 43  | 585  | 627  |
| LinJ32_V3.2460 | <i>L. infantum</i> | 60  | 700  | 759  |
| LinJ32_V3.2460 | <i>L. infantum</i> | 48  | 867  | 914  |
| LinJ32_V3.2460 | <i>L. infantum</i> | 54  | 948  | 1001 |
| LinJ32_V3.2460 | <i>L. infantum</i> | 114 | 1007 | 1120 |
| LinJ32_V3.2490 | <i>L. infantum</i> | 85  | 78   | 162  |
| LinJ32_V3.2490 | <i>L. infantum</i> | 291 | 196  | 486  |
| LinJ32_V3.2500 | <i>L. infantum</i> | 174 | 1    | 174  |
| LinJ32_V3.2500 | <i>L. infantum</i> | 122 | 475  | 596  |
| LinJ32_V3.2520 | <i>L. infantum</i> | 52  | 53   | 104  |
| LinJ32_V3.2520 | <i>L. infantum</i> | 42  | 652  | 693  |
| LinJ32_V3.2520 | <i>L. infantum</i> | 42  | 652  | 693  |
| LinJ32_V3.2530 | <i>L. infantum</i> | 467 | 1    | 467  |
| LinJ32_V3.2530 | <i>L. infantum</i> | 46  | 504  | 549  |
| LinJ32_V3.2550 | <i>L. infantum</i> | 47  | 211  | 257  |
| LinJ32_V3.2560 | <i>L. infantum</i> | 117 | 1    | 117  |
| LinJ32_V3.2560 | <i>L. infantum</i> | 258 | 171  | 428  |
| LinJ32_V3.2560 | <i>L. infantum</i> | 68  | 537  | 604  |
| LinJ32_V3.2560 | <i>L. infantum</i> | 81  | 685  | 765  |
| LinJ32_V3.2560 | <i>L. infantum</i> | 86  | 837  | 922  |
| LinJ32_V3.2560 | <i>L. infantum</i> | 294 | 927  | 1220 |
| LinJ32_V3.2560 | <i>L. infantum</i> | 143 | 1238 | 1380 |
| LinJ32_V3.2560 | <i>L. infantum</i> | 91  | 1410 | 1500 |
| LinJ32_V3.2560 | <i>L. infantum</i> | 559 | 1540 | 2098 |
| LinJ32_V3.2560 | <i>L. infantum</i> | 62  | 2125 | 2186 |
| LinJ32_V3.2560 | <i>L. infantum</i> | 347 | 2190 | 2536 |
| LinJ32_V3.2570 | <i>L. infantum</i> | 84  | 65   | 148  |
| LinJ32_V3.2570 | <i>L. infantum</i> | 69  | 238  | 306  |
| LinJ32_V3.2570 | <i>L. infantum</i> | 82  | 481  | 562  |
| LinJ32_V3.2570 | <i>L. infantum</i> | 54  | 616  | 669  |
| LinJ32_V3.2570 | <i>L. infantum</i> | 144 | 734  | 877  |
| LinJ32_V3.2590 | <i>L. infantum</i> | 52  | 1    | 52   |
| LinJ32_V3.2590 | <i>L. infantum</i> | 72  | 345  | 416  |
| LinJ32_V3.2610 | <i>L. infantum</i> | 143 | 128  | 270  |
| LinJ32_V3.2610 | <i>L. infantum</i> | 589 | 312  | 900  |
| LinJ32_V3.2620 | <i>L. infantum</i> | 56  | 1    | 56   |
| LinJ32_V3.2630 | <i>L. infantum</i> | 145 | 39   | 183  |

|                |                    |     |      |      |
|----------------|--------------------|-----|------|------|
| LinJ32_V3.2630 | <i>L. infantum</i> | 130 | 636  | 765  |
| LinJ32_V3.2650 | <i>L. infantum</i> | 117 | 49   | 165  |
| LinJ32_V3.2650 | <i>L. infantum</i> | 55  | 447  | 501  |
| LinJ32_V3.2660 | <i>L. infantum</i> | 842 | 79   | 920  |
| LinJ32_V3.2670 | <i>L. infantum</i> | 114 | 196  | 309  |
| LinJ32_V3.2670 | <i>L. infantum</i> | 85  | 585  | 669  |
| LinJ32_V3.2670 | <i>L. infantum</i> | 68  | 877  | 944  |
| LinJ32_V3.2680 | <i>L. infantum</i> | 47  | 362  | 408  |
| LinJ32_V3.2680 | <i>L. infantum</i> | 144 | 530  | 673  |
| LinJ32_V3.2690 | <i>L. infantum</i> | 75  | 1    | 75   |
| LinJ32_V3.2690 | <i>L. infantum</i> | 50  | 129  | 178  |
| LinJ32_V3.2690 | <i>L. infantum</i> | 72  | 1391 | 1462 |
| LinJ32_V3.2690 | <i>L. infantum</i> | 63  | 1476 | 1538 |
| LinJ32_V3.2690 | <i>L. infantum</i> | 52  | 1561 | 1612 |
| LinJ32_V3.2710 | <i>L. infantum</i> | 113 | 1    | 113  |
| LinJ32_V3.2710 | <i>L. infantum</i> | 274 | 138  | 411  |
| LinJ32_V3.2710 | <i>L. infantum</i> | 98  | 413  | 510  |
| LinJ32_V3.2710 | <i>L. infantum</i> | 67  | 532  | 598  |
| LinJ32_V3.2710 | <i>L. infantum</i> | 106 | 641  | 746  |
| LinJ32_V3.2710 | <i>L. infantum</i> | 60  | 756  | 815  |
| LinJ32_V3.2720 | <i>L. infantum</i> | 40  | 404  | 443  |
| LinJ32_V3.2730 | <i>L. infantum</i> | 46  | 1    | 46   |
| LinJ32_V3.2740 | <i>L. infantum</i> | 115 | 249  | 363  |
| LinJ32_V3.2740 | <i>L. infantum</i> | 204 | 433  | 636  |
| LinJ32_V3.2750 | <i>L. infantum</i> | 469 | 1    | 469  |
| LinJ32_V3.2750 | <i>L. infantum</i> | 374 | 483  | 856  |
| LinJ32_V3.2790 | <i>L. infantum</i> | 86  | 227  | 312  |
| LinJ32_V3.2790 | <i>L. infantum</i> | 55  | 1097 | 1151 |
| LinJ32_V3.2800 | <i>L. infantum</i> | 66  | 1    | 66   |
| LinJ32_V3.2810 | <i>L. infantum</i> | 131 | 1    | 131  |
| LinJ32_V3.2810 | <i>L. infantum</i> | 117 | 189  | 305  |
| LinJ32_V3.2810 | <i>L. infantum</i> | 58  | 420  | 477  |
| LinJ32_V3.2810 | <i>L. infantum</i> | 65  | 515  | 579  |
| LinJ32_V3.2810 | <i>L. infantum</i> | 70  | 600  | 669  |
| LinJ32_V3.2810 | <i>L. infantum</i> | 50  | 741  | 790  |
| LinJ32_V3.2840 | <i>L. infantum</i> | 77  | 216  | 292  |
| LinJ32_V3.2840 | <i>L. infantum</i> | 63  | 589  | 651  |
| LinJ32_V3.2840 | <i>L. infantum</i> | 79  | 1050 | 1128 |
| LinJ32_V3.2870 | <i>L. infantum</i> | 121 | 268  | 388  |
| LinJ32_V3.2870 | <i>L. infantum</i> | 45  | 447  | 491  |
| LinJ32_V3.2870 | <i>L. infantum</i> | 52  | 613  | 664  |
| LinJ32_V3.2890 | <i>L. infantum</i> | 184 | 33   | 216  |
| LinJ32_V3.2890 | <i>L. infantum</i> | 178 | 488  | 665  |
| LinJ32_V3.2890 | <i>L. infantum</i> | 80  | 901  | 980  |
| LinJ32_V3.2890 | <i>L. infantum</i> | 65  | 1230 | 1294 |
| LinJ32_V3.2890 | <i>L. infantum</i> | 53  | 1314 | 1366 |
| LinJ32_V3.2900 | <i>L. infantum</i> | 329 | 1    | 329  |



|                |                    |     |      |      |
|----------------|--------------------|-----|------|------|
| LinJ32_V3.2900 | <i>L. infantum</i> | 53  | 430  | 482  |
| LinJ32_V3.2900 | <i>L. infantum</i> | 371 | 494  | 864  |
| LinJ32_V3.2910 | <i>L. infantum</i> | 50  | 1    | 50   |
| LinJ32_V3.2910 | <i>L. infantum</i> | 114 | 153  | 266  |
| LinJ32_V3.2910 | <i>L. infantum</i> | 685 | 272  | 956  |
| LinJ32_V3.2920 | <i>L. infantum</i> | 59  | 311  | 369  |
| LinJ32_V3.2920 | <i>L. infantum</i> | 62  | 465  | 526  |
| LinJ32_V3.2920 | <i>L. infantum</i> | 114 | 973  | 1086 |
| LinJ32_V3.2940 | <i>L. infantum</i> | 224 | 1    | 224  |
| LinJ32_V3.2940 | <i>L. infantum</i> | 73  | 408  | 480  |
| LinJ32_V3.2950 | <i>L. infantum</i> | 126 | 1    | 126  |
| LinJ32_V3.2950 | <i>L. infantum</i> | 78  | 181  | 258  |
| LinJ32_V3.2950 | <i>L. infantum</i> | 78  | 181  | 258  |
| LinJ32_V3.2960 | <i>L. infantum</i> | 73  | 1    | 73   |
| LinJ32_V3.2970 | <i>L. infantum</i> | 92  | 1    | 92   |
| LinJ32_V3.2970 | <i>L. infantum</i> | 270 | 103  | 372  |
| LinJ32_V3.2970 | <i>L. infantum</i> | 277 | 407  | 683  |
| LinJ32_V3.2970 | <i>L. infantum</i> | 234 | 731  | 964  |
| LinJ32_V3.2970 | <i>L. infantum</i> | 112 | 1004 | 1115 |
| LinJ32_V3.2980 | <i>L. infantum</i> | 394 | 107  | 500  |
| LinJ32_V3.2980 | <i>L. infantum</i> | 53  | 518  | 570  |
| LinJ32_V3.2990 | <i>L. infantum</i> | 152 | 95   | 246  |
| LinJ32_V3.2990 | <i>L. infantum</i> | 45  | 397  | 441  |
| LinJ32_V3.2990 | <i>L. infantum</i> | 63  | 502  | 564  |
| LinJ32_V3.3000 | <i>L. infantum</i> | 188 | 118  | 305  |
| LinJ32_V3.3000 | <i>L. infantum</i> | 155 | 317  | 471  |
| LinJ32_V3.3020 | <i>L. infantum</i> | 136 | 1    | 136  |
| LinJ32_V3.3020 | <i>L. infantum</i> | 228 | 202  | 429  |
| LinJ32_V3.3020 | <i>L. infantum</i> | 64  | 471  | 534  |
| LinJ32_V3.3030 | <i>L. infantum</i> | 121 | 133  | 253  |
| LinJ32_V3.3030 | <i>L. infantum</i> | 45  | 343  | 387  |
| LinJ32_V3.3040 | <i>L. infantum</i> | 56  | 39   | 94   |
| LinJ32_V3.3050 | <i>L. infantum</i> | 152 | 161  | 312  |
| LinJ32_V3.3050 | <i>L. infantum</i> | 48  | 355  | 402  |
| LinJ32_V3.3050 | <i>L. infantum</i> | 149 | 470  | 618  |
| LinJ32_V3.3060 | <i>L. infantum</i> | 90  | 1    | 90   |
| LinJ32_V3.3060 | <i>L. infantum</i> | 43  | 221  | 263  |
| LinJ32_V3.3060 | <i>L. infantum</i> | 96  | 1043 | 1138 |
| LinJ32_V3.3080 | <i>L. infantum</i> | 41  | 69   | 109  |
| LinJ32_V3.3080 | <i>L. infantum</i> | 61  | 329  | 389  |
| LinJ32_V3.3080 | <i>L. infantum</i> | 61  | 329  | 389  |
| LinJ32_V3.3120 | <i>L. infantum</i> | 42  | 627  | 668  |
| LinJ32_V3.3130 | <i>L. infantum</i> | 109 | 1    | 109  |
| LinJ32_V3.3140 | <i>L. infantum</i> | 54  | 1    | 54   |
| LinJ32_V3.3160 | <i>L. infantum</i> | 57  | 682  | 738  |
| LinJ32_V3.3200 | <i>L. infantum</i> | 73  | 803  | 875  |
| LinJ32_V3.3210 | <i>L. infantum</i> | 41  | 18   | 58   |

|                |                    |     |      |      |
|----------------|--------------------|-----|------|------|
| LinJ32_V3.3210 | <i>L. infantum</i> | 109 | 351  | 459  |
| LinJ32_V3.3210 | <i>L. infantum</i> | 97  | 490  | 586  |
| LinJ32_V3.3210 | <i>L. infantum</i> | 64  | 643  | 706  |
| LinJ32_V3.3210 | <i>L. infantum</i> | 45  | 731  | 775  |
| LinJ32_V3.3220 | <i>L. infantum</i> | 198 | 72   | 269  |
| LinJ32_V3.3250 | <i>L. infantum</i> | 130 | 1    | 130  |
| LinJ32_V3.3250 | <i>L. infantum</i> | 59  | 187  | 245  |
| LinJ32_V3.3250 | <i>L. infantum</i> | 159 | 406  | 564  |
| LinJ32_V3.3250 | <i>L. infantum</i> | 45  | 638  | 682  |
| LinJ32_V3.3250 | <i>L. infantum</i> | 51  | 736  | 786  |
| LinJ32_V3.3250 | <i>L. infantum</i> | 239 | 862  | 1100 |
| LinJ32_V3.3270 | <i>L. infantum</i> | 82  | 172  | 253  |
| LinJ32_V3.3270 | <i>L. infantum</i> | 41  | 416  | 456  |
| LinJ32_V3.3280 | <i>L. infantum</i> | 69  | 1    | 69   |
| LinJ32_V3.3290 | <i>L. infantum</i> | 275 | 1    | 275  |
| LinJ32_V3.3290 | <i>L. infantum</i> | 400 | 279  | 678  |
| LinJ32_V3.3290 | <i>L. infantum</i> | 56  | 729  | 784  |
| LinJ32_V3.3290 | <i>L. infantum</i> | 44  | 813  | 856  |
| LinJ32_V3.3290 | <i>L. infantum</i> | 66  | 975  | 1040 |
| LinJ32_V3.3290 | <i>L. infantum</i> | 255 | 1257 | 1511 |
| LinJ32_V3.3300 | <i>L. infantum</i> | 108 | 1    | 108  |
| LinJ32_V3.3300 | <i>L. infantum</i> | 144 | 133  | 276  |
| LinJ32_V3.3300 | <i>L. infantum</i> | 144 | 133  | 276  |
| LinJ32_V3.3310 | <i>L. infantum</i> | 67  | 395  | 461  |
| LinJ32_V3.3310 | <i>L. infantum</i> | 59  | 901  | 959  |
| LinJ32_V3.3310 | <i>L. infantum</i> | 59  | 901  | 959  |
| LinJ32_V3.3320 | <i>L. infantum</i> | 42  | 1    | 42   |
| LinJ32_V3.3320 | <i>L. infantum</i> | 86  | 334  | 419  |
| LinJ32_V3.3320 | <i>L. infantum</i> | 86  | 334  | 419  |
| LinJ32_V3.3330 | <i>L. infantum</i> | 42  | 1    | 42   |
| LinJ32_V3.3330 | <i>L. infantum</i> | 86  | 334  | 419  |
| LinJ32_V3.3330 | <i>L. infantum</i> | 86  | 334  | 419  |
| LinJ32_V3.3340 | <i>L. infantum</i> | 86  | 1    | 86   |
| LinJ32_V3.3350 | <i>L. infantum</i> | 336 | 308  | 643  |
| LinJ32_V3.3350 | <i>L. infantum</i> | 66  | 685  | 750  |
| LinJ32_V3.3350 | <i>L. infantum</i> | 52  | 798  | 849  |
| LinJ32_V3.3350 | <i>L. infantum</i> | 109 | 945  | 1053 |
| LinJ32_V3.3350 | <i>L. infantum</i> | 333 | 1087 | 1419 |
| LinJ32_V3.3350 | <i>L. infantum</i> | 229 | 1485 | 1713 |
| LinJ32_V3.3350 | <i>L. infantum</i> | 70  | 1758 | 1827 |
| LinJ32_V3.3350 | <i>L. infantum</i> | 65  | 1839 | 1903 |
| LinJ32_V3.3350 | <i>L. infantum</i> | 218 | 1932 | 2149 |
| LinJ32_V3.3350 | <i>L. infantum</i> | 70  | 2194 | 2263 |
| LinJ32_V3.3350 | <i>L. infantum</i> | 65  | 2275 | 2339 |
| LinJ32_V3.3350 | <i>L. infantum</i> | 91  | 2368 | 2458 |
| LinJ32_V3.3350 | <i>L. infantum</i> | 76  | 2539 | 2614 |
| LinJ32_V3.3360 | <i>L. infantum</i> | 82  | 43   | 124  |

|                |                    |     |      |      |
|----------------|--------------------|-----|------|------|
| LinJ32_V3.3360 | <i>L. infantum</i> | 93  | 245  | 337  |
| LinJ32_V3.3360 | <i>L. infantum</i> | 100 | 547  | 646  |
| LinJ32_V3.3360 | <i>L. infantum</i> | 76  | 695  | 770  |
| LinJ32_V3.3380 | <i>L. infantum</i> | 61  | 1    | 61   |
| LinJ32_V3.3380 | <i>L. infantum</i> | 53  | 248  | 300  |
| LinJ32_V3.3380 | <i>L. infantum</i> | 51  | 623  | 673  |
| LinJ32_V3.3390 | <i>L. infantum</i> | 48  | 63   | 110  |
| LinJ32_V3.3390 | <i>L. infantum</i> | 51  | 177  | 227  |
| LinJ32_V3.3390 | <i>L. infantum</i> | 57  | 234  | 290  |
| LinJ32_V3.3390 | <i>L. infantum</i> | 43  | 455  | 497  |
| LinJ32_V3.3390 | <i>L. infantum</i> | 46  | 734  | 779  |
| LinJ32_V3.3390 | <i>L. infantum</i> | 70  | 936  | 1005 |
| LinJ32_V3.3400 | <i>L. infantum</i> | 75  | 1    | 75   |
| LinJ32_V3.3400 | <i>L. infantum</i> | 104 | 255  | 358  |
| LinJ32_V3.3400 | <i>L. infantum</i> | 169 | 445  | 613  |
| LinJ32_V3.3400 | <i>L. infantum</i> | 45  | 622  | 666  |
| LinJ32_V3.3400 | <i>L. infantum</i> | 56  | 830  | 885  |
| LinJ32_V3.3400 | <i>L. infantum</i> | 78  | 1063 | 1140 |
| LinJ32_V3.3400 | <i>L. infantum</i> | 40  | 1172 | 1211 |
| LinJ32_V3.3420 | <i>L. infantum</i> | 233 | 1    | 233  |
| LinJ32_V3.3420 | <i>L. infantum</i> | 85  | 246  | 330  |
| LinJ32_V3.3420 | <i>L. infantum</i> | 82  | 407  | 488  |
| LinJ32_V3.3420 | <i>L. infantum</i> | 45  | 525  | 569  |
| LinJ32_V3.3430 | <i>L. infantum</i> | 67  | 1    | 67   |
| LinJ32_V3.3430 | <i>L. infantum</i> | 43  | 334  | 376  |
| LinJ32_V3.3440 | <i>L. infantum</i> | 76  | 194  | 269  |
| LinJ32_V3.3440 | <i>L. infantum</i> | 58  | 435  | 492  |
| LinJ32_V3.3440 | <i>L. infantum</i> | 92  | 508  | 599  |
| LinJ32_V3.3440 | <i>L. infantum</i> | 60  | 725  | 784  |
| LinJ32_V3.3440 | <i>L. infantum</i> | 51  | 1045 | 1095 |
| LinJ32_V3.3450 | <i>L. infantum</i> | 139 | 288  | 426  |
| LinJ32_V3.3450 | <i>L. infantum</i> | 340 | 431  | 770  |
| LinJ32_V3.3450 | <i>L. infantum</i> | 322 | 785  | 1106 |
| LinJ32_V3.3480 | <i>L. infantum</i> | 56  | 33   | 88   |
| LinJ32_V3.3480 | <i>L. infantum</i> | 97  | 195  | 291  |
| LinJ32_V3.3480 | <i>L. infantum</i> | 482 | 353  | 834  |
| LinJ32_V3.3490 | <i>L. infantum</i> | 77  | 164  | 240  |
| LinJ32_V3.3500 | <i>L. infantum</i> | 106 | 61   | 166  |
| LinJ32_V3.3500 | <i>L. infantum</i> | 47  | 250  | 296  |
| LinJ32_V3.3500 | <i>L. infantum</i> | 47  | 250  | 296  |
| LinJ32_V3.3530 | <i>L. infantum</i> | 51  | 64   | 114  |
| LinJ32_V3.3540 | <i>L. infantum</i> | 40  | 309  | 348  |
| LinJ32_V3.3540 | <i>L. infantum</i> | 82  | 396  | 477  |
| LinJ32_V3.3540 | <i>L. infantum</i> | 59  | 847  | 905  |
| LinJ32_V3.3540 | <i>L. infantum</i> | 43  | 1069 | 1111 |
| LinJ32_V3.3550 | <i>L. infantum</i> | 41  | 77   | 117  |
| LinJ32_V3.3550 | <i>L. infantum</i> | 65  | 236  | 300  |

|                |                    |     |      |      |
|----------------|--------------------|-----|------|------|
| LinJ32_V3.3550 | <i>L. infantum</i> | 50  | 316  | 365  |
| LinJ32_V3.3550 | <i>L. infantum</i> | 155 | 395  | 549  |
| LinJ32_V3.3550 | <i>L. infantum</i> | 197 | 566  | 762  |
| LinJ32_V3.3550 | <i>L. infantum</i> | 93  | 810  | 902  |
| LinJ32_V3.3550 | <i>L. infantum</i> | 102 | 1000 | 1101 |
| LinJ32_V3.3550 | <i>L. infantum</i> | 65  | 1152 | 1216 |
| LinJ32_V3.3560 | <i>L. infantum</i> | 159 | 80   | 238  |
| LinJ32_V3.3560 | <i>L. infantum</i> | 53  | 301  | 353  |
| LinJ32_V3.3560 | <i>L. infantum</i> | 47  | 570  | 616  |
| LinJ32_V3.3580 | <i>L. infantum</i> | 142 | 1    | 142  |
| LinJ32_V3.3580 | <i>L. infantum</i> | 82  | 289  | 370  |
| LinJ32_V3.3580 | <i>L. infantum</i> | 58  | 393  | 450  |
| LinJ32_V3.3580 | <i>L. infantum</i> | 46  | 755  | 800  |
| LinJ32_V3.3590 | <i>L. infantum</i> | 67  | 1    | 67   |
| LinJ32_V3.3600 | <i>L. infantum</i> | 46  | 386  | 431  |
| LinJ32_V3.3610 | <i>L. infantum</i> | 135 | 1    | 135  |
| LinJ32_V3.3610 | <i>L. infantum</i> | 41  | 790  | 830  |
| LinJ32_V3.3610 | <i>L. infantum</i> | 44  | 871  | 914  |
| LinJ32_V3.3610 | <i>L. infantum</i> | 57  | 1299 | 1355 |
| LinJ32_V3.3610 | <i>L. infantum</i> | 55  | 1415 | 1469 |
| LinJ32_V3.3610 | <i>L. infantum</i> | 54  | 1473 | 1526 |
| LinJ32_V3.3610 | <i>L. infantum</i> | 64  | 1628 | 1691 |
| LinJ32_V3.3610 | <i>L. infantum</i> | 44  | 2072 | 2115 |
| LinJ32_V3.3630 | <i>L. infantum</i> | 71  | 1    | 71   |
| LinJ32_V3.3630 | <i>L. infantum</i> | 76  | 114  | 189  |
| LinJ32_V3.3630 | <i>L. infantum</i> | 388 | 255  | 642  |
| LinJ32_V3.3630 | <i>L. infantum</i> | 133 | 673  | 805  |
| LinJ32_V3.3640 | <i>L. infantum</i> | 83  | 181  | 263  |
| LinJ32_V3.3640 | <i>L. infantum</i> | 41  | 593  | 633  |
| LinJ32_V3.3640 | <i>L. infantum</i> | 41  | 593  | 633  |
| LinJ32_V3.3650 | <i>L. infantum</i> | 298 | 147  | 444  |
| LinJ32_V3.3650 | <i>L. infantum</i> | 81  | 478  | 558  |
| LinJ32_V3.3670 | <i>L. infantum</i> | 87  | 112  | 198  |
| LinJ32_V3.3670 | <i>L. infantum</i> | 104 | 352  | 455  |
| LinJ32_V3.3680 | <i>L. infantum</i> | 42  | 1    | 42   |
| LinJ32_V3.3680 | <i>L. infantum</i> | 95  | 81   | 175  |
| LinJ32_V3.3680 | <i>L. infantum</i> | 95  | 81   | 175  |
| LinJ32_V3.3690 | <i>L. infantum</i> | 49  | 1    | 49   |
| LinJ32_V3.3690 | <i>L. infantum</i> | 102 | 488  | 589  |
| LinJ32_V3.3690 | <i>L. infantum</i> | 102 | 488  | 589  |
| LinJ32_V3.3700 | <i>L. infantum</i> | 80  | 221  | 300  |
| LinJ32_V3.3710 | <i>L. infantum</i> | 72  | 58   | 129  |
| LinJ32_V3.3710 | <i>L. infantum</i> | 49  | 235  | 283  |
| LinJ32_V3.3710 | <i>L. infantum</i> | 129 | 313  | 441  |
| LinJ32_V3.3720 | <i>L. infantum</i> | 40  | 1    | 40   |
| LinJ32_V3.3720 | <i>L. infantum</i> | 45  | 177  | 221  |
| LinJ32_V3.3720 | <i>L. infantum</i> | 45  | 177  | 221  |

|                |                    |     |      |      |
|----------------|--------------------|-----|------|------|
| LinJ32_V3.3730 | <i>L. infantum</i> | 66  | 39   | 104  |
| LinJ32_V3.3730 | <i>L. infantum</i> | 75  | 112  | 186  |
| LinJ32_V3.3730 | <i>L. infantum</i> | 98  | 440  | 537  |
| LinJ32_V3.3740 | <i>L. infantum</i> | 151 | 1    | 151  |
| LinJ32_V3.3740 | <i>L. infantum</i> | 119 | 262  | 380  |
| LinJ32_V3.3740 | <i>L. infantum</i> | 134 | 485  | 618  |
| LinJ32_V3.3740 | <i>L. infantum</i> | 87  | 694  | 780  |
| LinJ32_V3.3740 | <i>L. infantum</i> | 59  | 1124 | 1182 |
| LinJ32_V3.3760 | <i>L. infantum</i> | 72  | 1    | 72   |
| LinJ32_V3.3760 | <i>L. infantum</i> | 47  | 146  | 192  |
| LinJ32_V3.3760 | <i>L. infantum</i> | 47  | 146  | 192  |
| LinJ32_V3.3780 | <i>L. infantum</i> | 105 | 1    | 105  |
| LinJ32_V3.3800 | <i>L. infantum</i> | 90  | 334  | 423  |
| LinJ32_V3.3840 | <i>L. infantum</i> | 937 | 1    | 937  |
| LinJ32_V3.3850 | <i>L. infantum</i> | 40  | 48   | 87   |
| LinJ32_V3.3850 | <i>L. infantum</i> | 65  | 289  | 353  |
| LinJ32_V3.3850 | <i>L. infantum</i> | 88  | 550  | 637  |
| LinJ32_V3.3850 | <i>L. infantum</i> | 67  | 661  | 727  |
| LinJ32_V3.3860 | <i>L. infantum</i> | 48  | 1    | 48   |
| LinJ32_V3.3860 | <i>L. infantum</i> | 44  | 92   | 135  |
| LinJ32_V3.3860 | <i>L. infantum</i> | 44  | 92   | 135  |
| LinJ32_V3.3900 | <i>L. infantum</i> | 52  | 58   | 109  |
| LinJ32_V3.3910 | <i>L. infantum</i> | 43  | 274  | 316  |
| LinJ32_V3.3910 | <i>L. infantum</i> | 60  | 549  | 608  |
| LinJ32_V3.3910 | <i>L. infantum</i> | 60  | 549  | 608  |
| LinJ32_V3.3920 | <i>L. infantum</i> | 91  | 42   | 132  |
| LinJ32_V3.3930 | <i>L. infantum</i> | 64  | 1    | 64   |
| LinJ32_V3.3930 | <i>L. infantum</i> | 43  | 94   | 136  |
| LinJ32_V3.3930 | <i>L. infantum</i> | 43  | 94   | 136  |
| LinJ32_V3.3950 | <i>L. infantum</i> | 51  | 34   | 84   |
| LinJ32_V3.3960 | <i>L. infantum</i> | 83  | 292  | 374  |
| LinJ32_V3.4000 | <i>L. infantum</i> | 154 | 32   | 185  |
| LinJ32_V3.4000 | <i>L. infantum</i> | 70  | 222  | 291  |
| LinJ32_V3.4010 | <i>L. infantum</i> | 42  | 356  | 397  |
| LinJ32_V3.4010 | <i>L. infantum</i> | 43  | 716  | 758  |
| LinJ32_V3.4010 | <i>L. infantum</i> | 95  | 794  | 888  |
| LinJ32_V3.4020 | <i>L. infantum</i> | 40  | 596  | 635  |
| LinJ32_V3.4020 | <i>L. infantum</i> | 49  | 762  | 810  |
| LinJ32_V3.4020 | <i>L. infantum</i> | 49  | 762  | 810  |
| LinJ32_V3.4040 | <i>L. infantum</i> | 56  | 333  | 388  |
| LinJ32_V3.4050 | <i>L. infantum</i> | 63  | 198  | 260  |
| LinJ32_V3.4070 | <i>L. infantum</i> | 91  | 680  | 770  |
| LinJ32_V3.4080 | <i>L. infantum</i> | 49  | 1264 | 1312 |
| LinJ32_V3.4100 | <i>L. infantum</i> | 91  | 814  | 904  |
| LinJ32_V3.4110 | <i>L. infantum</i> | 47  | 139  | 185  |
| LinJ32_V3.4120 | <i>L. infantum</i> | 63  | 14   | 76   |
| LinJ32_V3.4130 | <i>L. infantum</i> | 49  | 121  | 169  |

|                |                    |     |      |      |
|----------------|--------------------|-----|------|------|
| LinJ32_V3.4140 | <i>L. infantum</i> | 109 | 50   | 158  |
| LinJ33_V3.0010 | <i>L. infantum</i> | 43  | 508  | 550  |
| LinJ33_V3.0010 | <i>L. infantum</i> | 40  | 645  | 684  |
| LinJ33_V3.0010 | <i>L. infantum</i> | 55  | 768  | 822  |
| LinJ33_V3.0040 | <i>L. infantum</i> | 121 | 249  | 369  |
| LinJ33_V3.0050 | <i>L. infantum</i> | 76  | 142  | 217  |
| LinJ33_V3.0060 | <i>L. infantum</i> | 85  | 11   | 95   |
| LinJ33_V3.0070 | <i>L. infantum</i> | 80  | 176  | 255  |
| LinJ33_V3.0070 | <i>L. infantum</i> | 76  | 347  | 422  |
| LinJ33_V3.0080 | <i>L. infantum</i> | 60  | 103  | 162  |
| LinJ33_V3.0090 | <i>L. infantum</i> | 46  | 514  | 559  |
| LinJ33_V3.0110 | <i>L. infantum</i> | 65  | 1    | 65   |
| LinJ33_V3.0110 | <i>L. infantum</i> | 60  | 113  | 172  |
| LinJ33_V3.0110 | <i>L. infantum</i> | 56  | 297  | 352  |
| LinJ33_V3.0120 | <i>L. infantum</i> | 173 | 1    | 173  |
| LinJ33_V3.0120 | <i>L. infantum</i> | 74  | 216  | 289  |
| LinJ33_V3.0130 | <i>L. infantum</i> | 99  | 219  | 317  |
| LinJ33_V3.0140 | <i>L. infantum</i> | 49  | 293  | 341  |
| LinJ33_V3.0150 | <i>L. infantum</i> | 47  | 362  | 408  |
| LinJ33_V3.0160 | <i>L. infantum</i> | 77  | 203  | 279  |
| LinJ33_V3.0170 | <i>L. infantum</i> | 40  | 299  | 338  |
| LinJ33_V3.0190 | <i>L. infantum</i> | 40  | 121  | 160  |
| LinJ33_V3.0200 | <i>L. infantum</i> | 54  | 479  | 532  |
| LinJ33_V3.0210 | <i>L. infantum</i> | 47  | 1    | 47   |
| LinJ33_V3.0210 | <i>L. infantum</i> | 71  | 485  | 555  |
| LinJ33_V3.0210 | <i>L. infantum</i> | 80  | 805  | 884  |
| LinJ33_V3.0210 | <i>L. infantum</i> | 63  | 1109 | 1171 |
| LinJ33_V3.0210 | <i>L. infantum</i> | 90  | 1261 | 1350 |
| LinJ33_V3.0210 | <i>L. infantum</i> | 122 | 1363 | 1484 |
| LinJ33_V3.0220 | <i>L. infantum</i> | 204 | 74   | 277  |
| LinJ33_V3.0220 | <i>L. infantum</i> | 130 | 455  | 584  |
| LinJ33_V3.0220 | <i>L. infantum</i> | 45  | 870  | 914  |
| LinJ33_V3.0230 | <i>L. infantum</i> | 166 | 91   | 256  |
| LinJ33_V3.0240 | <i>L. infantum</i> | 63  | 154  | 216  |
| LinJ33_V3.0240 | <i>L. infantum</i> | 61  | 496  | 556  |
| LinJ33_V3.0240 | <i>L. infantum</i> | 61  | 496  | 556  |
| LinJ33_V3.0250 | <i>L. infantum</i> | 49  | 373  | 421  |
| LinJ33_V3.0270 | <i>L. infantum</i> | 54  | 49   | 102  |
| LinJ33_V3.0280 | <i>L. infantum</i> | 168 | 21   | 188  |
| LinJ33_V3.0280 | <i>L. infantum</i> | 54  | 274  | 327  |
| LinJ33_V3.0300 | <i>L. infantum</i> | 41  | 164  | 204  |
| LinJ33_V3.0300 | <i>L. infantum</i> | 42  | 299  | 340  |
| LinJ33_V3.0300 | <i>L. infantum</i> | 42  | 299  | 340  |
| LinJ33_V3.0310 | <i>L. infantum</i> | 68  | 1    | 68   |
| LinJ33_V3.0320 | <i>L. infantum</i> | 56  | 82   | 137  |
| LinJ33_V3.0340 | <i>L. infantum</i> | 59  | 1    | 59   |
| LinJ33_V3.0340 | <i>L. infantum</i> | 49  | 131  | 179  |

|                |                    |     |      |      |
|----------------|--------------------|-----|------|------|
| LinJ33_V3.0340 | <i>L. infantum</i> | 75  | 594  | 668  |
| LinJ33_V3.0350 | <i>L. infantum</i> | 102 | 162  | 263  |
| LinJ33_V3.0350 | <i>L. infantum</i> | 53  | 491  | 543  |
| LinJ33_V3.0360 | <i>L. infantum</i> | 101 | 177  | 277  |
| LinJ33_V3.0360 | <i>L. infantum</i> | 59  | 504  | 562  |
| LinJ33_V3.0370 | <i>L. infantum</i> | 101 | 177  | 277  |
| LinJ33_V3.0370 | <i>L. infantum</i> | 59  | 504  | 562  |
| LinJ33_V3.0380 | <i>L. infantum</i> | 188 | 1    | 188  |
| LinJ33_V3.0380 | <i>L. infantum</i> | 132 | 226  | 357  |
| LinJ33_V3.0400 | <i>L. infantum</i> | 190 | 62   | 251  |
| LinJ33_V3.0410 | <i>L. infantum</i> | 44  | 1    | 44   |
| LinJ33_V3.0410 | <i>L. infantum</i> | 70  | 234  | 303  |
| LinJ33_V3.0410 | <i>L. infantum</i> | 70  | 234  | 303  |
| LinJ33_V3.0420 | <i>L. infantum</i> | 46  | 529  | 574  |
| LinJ33_V3.0420 | <i>L. infantum</i> | 45  | 873  | 917  |
| LinJ33_V3.0420 | <i>L. infantum</i> | 45  | 873  | 917  |
| LinJ33_V3.0440 | <i>L. infantum</i> | 50  | 38   | 87   |
| LinJ33_V3.0440 | <i>L. infantum</i> | 58  | 196  | 253  |
| LinJ33_V3.0440 | <i>L. infantum</i> | 47  | 412  | 458  |
| LinJ33_V3.0440 | <i>L. infantum</i> | 83  | 562  | 644  |
| LinJ33_V3.0440 | <i>L. infantum</i> | 65  | 676  | 740  |
| LinJ33_V3.0460 | <i>L. infantum</i> | 71  | 85   | 155  |
| LinJ33_V3.0470 | <i>L. infantum</i> | 132 | 102  | 233  |
| LinJ33_V3.0480 | <i>L. infantum</i> | 51  | 491  | 541  |
| LinJ33_V3.0490 | <i>L. infantum</i> | 211 | 117  | 327  |
| LinJ33_V3.0490 | <i>L. infantum</i> | 144 | 352  | 495  |
| LinJ33_V3.0490 | <i>L. infantum</i> | 76  | 647  | 722  |
| LinJ33_V3.0500 | <i>L. infantum</i> | 113 | 38   | 150  |
| LinJ33_V3.0500 | <i>L. infantum</i> | 111 | 168  | 278  |
| LinJ33_V3.0500 | <i>L. infantum</i> | 117 | 593  | 709  |
| LinJ33_V3.0500 | <i>L. infantum</i> | 45  | 716  | 760  |
| LinJ33_V3.0500 | <i>L. infantum</i> | 57  | 810  | 866  |
| LinJ33_V3.0520 | <i>L. infantum</i> | 73  | 1    | 73   |
| LinJ33_V3.0520 | <i>L. infantum</i> | 56  | 120  | 175  |
| LinJ33_V3.0520 | <i>L. infantum</i> | 45  | 409  | 453  |
| LinJ33_V3.0520 | <i>L. infantum</i> | 46  | 510  | 555  |
| LinJ33_V3.0520 | <i>L. infantum</i> | 66  | 745  | 810  |
| LinJ33_V3.0560 | <i>L. infantum</i> | 78  | 153  | 230  |
| LinJ33_V3.0560 | <i>L. infantum</i> | 86  | 363  | 448  |
| LinJ33_V3.0570 | <i>L. infantum</i> | 78  | 142  | 219  |
| LinJ33_V3.0570 | <i>L. infantum</i> | 50  | 1399 | 1448 |
| LinJ33_V3.0570 | <i>L. infantum</i> | 43  | 1490 | 1532 |
| LinJ33_V3.0570 | <i>L. infantum</i> | 108 | 1958 | 2065 |
| LinJ33_V3.0590 | <i>L. infantum</i> | 66  | 79   | 144  |
| LinJ33_V3.0600 | <i>L. infantum</i> | 49  | 89   | 137  |
| LinJ33_V3.0600 | <i>L. infantum</i> | 55  | 524  | 578  |
| LinJ33_V3.0610 | <i>L. infantum</i> | 292 | 28   | 319  |

|                |                    |     |      |      |
|----------------|--------------------|-----|------|------|
| LinJ33_V3.0610 | <i>L. infantum</i> | 59  | 321  | 379  |
| LinJ33_V3.0620 | <i>L. infantum</i> | 44  | 119  | 162  |
| LinJ33_V3.0620 | <i>L. infantum</i> | 100 | 190  | 289  |
| LinJ33_V3.0620 | <i>L. infantum</i> | 158 | 306  | 463  |
| LinJ33_V3.0620 | <i>L. infantum</i> | 152 | 472  | 623  |
| LinJ33_V3.0630 | <i>L. infantum</i> | 67  | 1    | 67   |
| LinJ33_V3.0630 | <i>L. infantum</i> | 189 | 77   | 265  |
| LinJ33_V3.0630 | <i>L. infantum</i> | 163 | 313  | 475  |
| LinJ33_V3.0630 | <i>L. infantum</i> | 98  | 548  | 645  |
| LinJ33_V3.0630 | <i>L. infantum</i> | 190 | 657  | 846  |
| LinJ33_V3.0640 | <i>L. infantum</i> | 46  | 145  | 190  |
| LinJ33_V3.0670 | <i>L. infantum</i> | 75  | 58   | 132  |
| LinJ33_V3.0670 | <i>L. infantum</i> | 86  | 153  | 238  |
| LinJ33_V3.0670 | <i>L. infantum</i> | 86  | 153  | 238  |
| LinJ33_V3.0680 | <i>L. infantum</i> | 122 | 1    | 122  |
| LinJ33_V3.0700 | <i>L. infantum</i> | 200 | 40   | 239  |
| LinJ33_V3.0700 | <i>L. infantum</i> | 76  | 381  | 456  |
| LinJ33_V3.0700 | <i>L. infantum</i> | 572 | 470  | 1041 |
| LinJ33_V3.0700 | <i>L. infantum</i> | 87  | 1044 | 1130 |
| LinJ33_V3.0700 | <i>L. infantum</i> | 266 | 1137 | 1402 |
| LinJ33_V3.0720 | <i>L. infantum</i> | 334 | 91   | 424  |
| LinJ33_V3.0720 | <i>L. infantum</i> | 47  | 459  | 505  |
| LinJ33_V3.0720 | <i>L. infantum</i> | 65  | 854  | 918  |
| LinJ33_V3.0730 | <i>L. infantum</i> | 44  | 1    | 44   |
| LinJ33_V3.0750 | <i>L. infantum</i> | 73  | 189  | 261  |
| LinJ33_V3.0760 | <i>L. infantum</i> | 68  | 163  | 230  |
| LinJ33_V3.0760 | <i>L. infantum</i> | 43  | 360  | 402  |
| LinJ33_V3.0760 | <i>L. infantum</i> | 43  | 360  | 402  |
| LinJ33_V3.0770 | <i>L. infantum</i> | 72  | 92   | 163  |
| LinJ33_V3.0780 | <i>L. infantum</i> | 101 | 1    | 101  |
| LinJ33_V3.0790 | <i>L. infantum</i> | 43  | 176  | 218  |
| LinJ33_V3.0790 | <i>L. infantum</i> | 96  | 227  | 322  |
| LinJ33_V3.0790 | <i>L. infantum</i> | 96  | 227  | 322  |
| LinJ33_V3.0800 | <i>L. infantum</i> | 42  | 23   | 64   |
| LinJ33_V3.0800 | <i>L. infantum</i> | 161 | 147  | 307  |
| LinJ33_V3.0800 | <i>L. infantum</i> | 82  | 490  | 571  |
| LinJ33_V3.0800 | <i>L. infantum</i> | 84  | 677  | 760  |
| LinJ33_V3.0810 | <i>L. infantum</i> | 327 | 1    | 327  |
| LinJ33_V3.0820 | <i>L. infantum</i> | 420 | 1    | 420  |
| LinJ33_V3.0830 | <i>L. infantum</i> | 116 | 69   | 184  |
| LinJ33_V3.0830 | <i>L. infantum</i> | 301 | 320  | 620  |
| LinJ33_V3.0830 | <i>L. infantum</i> | 253 | 629  | 881  |
| LinJ33_V3.0840 | <i>L. infantum</i> | 298 | 1    | 298  |
| LinJ33_V3.0840 | <i>L. infantum</i> | 394 | 311  | 704  |
| LinJ33_V3.0840 | <i>L. infantum</i> | 373 | 714  | 1086 |
| LinJ33_V3.0840 | <i>L. infantum</i> | 85  | 1142 | 1226 |
| LinJ33_V3.0840 | <i>L. infantum</i> | 138 | 1339 | 1476 |



|                |                    |     |      |      |
|----------------|--------------------|-----|------|------|
| LinJ33_V3.0840 | <i>L. infantum</i> | 177 | 1504 | 1680 |
| LinJ33_V3.0850 | <i>L. infantum</i> | 102 | 216  | 317  |
| LinJ33_V3.0850 | <i>L. infantum</i> | 69  | 471  | 539  |
| LinJ33_V3.0850 | <i>L. infantum</i> | 65  | 695  | 759  |
| LinJ33_V3.0850 | <i>L. infantum</i> | 98  | 1054 | 1151 |
| LinJ33_V3.0850 | <i>L. infantum</i> | 58  | 1179 | 1236 |
| LinJ33_V3.0860 | <i>L. infantum</i> | 40  | 404  | 443  |
| LinJ33_V3.0870 | <i>L. infantum</i> | 56  | 557  | 612  |
| LinJ33_V3.0880 | <i>L. infantum</i> | 205 | 1    | 205  |
| LinJ33_V3.0880 | <i>L. infantum</i> | 70  | 239  | 308  |
| LinJ33_V3.0880 | <i>L. infantum</i> | 197 | 513  | 709  |
| LinJ33_V3.0890 | <i>L. infantum</i> | 55  | 1    | 55   |
| LinJ33_V3.0890 | <i>L. infantum</i> | 60  | 119  | 178  |
| LinJ33_V3.0890 | <i>L. infantum</i> | 261 | 359  | 619  |
| LinJ33_V3.0890 | <i>L. infantum</i> | 61  | 751  | 811  |
| LinJ33_V3.0900 | <i>L. infantum</i> | 47  | 1    | 47   |
| LinJ33_V3.0900 | <i>L. infantum</i> | 59  | 95   | 153  |
| LinJ33_V3.0900 | <i>L. infantum</i> | 54  | 381  | 434  |
| LinJ33_V3.0910 | <i>L. infantum</i> | 198 | 1    | 198  |
| LinJ33_V3.0910 | <i>L. infantum</i> | 88  | 273  | 360  |
| LinJ33_V3.0920 | <i>L. infantum</i> | 47  | 261  | 307  |
| LinJ33_V3.0940 | <i>L. infantum</i> | 94  | 315  | 408  |
| LinJ33_V3.0940 | <i>L. infantum</i> | 88  | 494  | 581  |
| LinJ33_V3.0970 | <i>L. infantum</i> | 47  | 127  | 173  |
| LinJ33_V3.0970 | <i>L. infantum</i> | 66  | 193  | 258  |
| LinJ33_V3.0970 | <i>L. infantum</i> | 240 | 292  | 531  |
| LinJ33_V3.0970 | <i>L. infantum</i> | 76  | 708  | 783  |
| LinJ33_V3.0970 | <i>L. infantum</i> | 78  | 926  | 1003 |
| LinJ33_V3.0980 | <i>L. infantum</i> | 43  | 1    | 43   |
| LinJ33_V3.0980 | <i>L. infantum</i> | 43  | 167  | 209  |
| LinJ33_V3.0980 | <i>L. infantum</i> | 289 | 261  | 549  |
| LinJ33_V3.0990 | <i>L. infantum</i> | 302 | 37   | 338  |
| LinJ33_V3.0990 | <i>L. infantum</i> | 51  | 448  | 498  |
| LinJ33_V3.0990 | <i>L. infantum</i> | 110 | 665  | 774  |
| LinJ33_V3.0990 | <i>L. infantum</i> | 162 | 836  | 997  |
| LinJ33_V3.0990 | <i>L. infantum</i> | 84  | 1028 | 1111 |
| LinJ33_V3.1000 | <i>L. infantum</i> | 91  | 1    | 91   |
| LinJ33_V3.1000 | <i>L. infantum</i> | 181 | 111  | 291  |
| LinJ33_V3.1000 | <i>L. infantum</i> | 121 | 464  | 584  |
| LinJ33_V3.1000 | <i>L. infantum</i> | 50  | 782  | 831  |
| LinJ33_V3.1000 | <i>L. infantum</i> | 55  | 958  | 1012 |
| LinJ33_V3.1000 | <i>L. infantum</i> | 54  | 1156 | 1209 |
| LinJ33_V3.1000 | <i>L. infantum</i> | 143 | 1531 | 1673 |
| LinJ33_V3.1020 | <i>L. infantum</i> | 72  | 120  | 191  |
| LinJ33_V3.1020 | <i>L. infantum</i> | 185 | 370  | 554  |
| LinJ33_V3.1030 | <i>L. infantum</i> | 173 | 54   | 226  |
| LinJ33_V3.1050 | <i>L. infantum</i> | 113 | 35   | 147  |

|                |                    |     |     |      |
|----------------|--------------------|-----|-----|------|
| LinJ33_V3.1050 | <i>L. infantum</i> | 150 | 296 | 445  |
| LinJ33_V3.1050 | <i>L. infantum</i> | 64  | 486 | 549  |
| LinJ33_V3.1050 | <i>L. infantum</i> | 49  | 669 | 717  |
| LinJ33_V3.1050 | <i>L. infantum</i> | 250 | 766 | 1015 |
| LinJ33_V3.1060 | <i>L. infantum</i> | 53  | 440 | 492  |
| LinJ33_V3.1060 | <i>L. infantum</i> | 46  | 531 | 576  |
| LinJ33_V3.1060 | <i>L. infantum</i> | 46  | 728 | 773  |
| LinJ33_V3.1070 | <i>L. infantum</i> | 493 | 19  | 511  |
| LinJ33_V3.1070 | <i>L. infantum</i> | 122 | 520 | 641  |
| LinJ33_V3.1070 | <i>L. infantum</i> | 57  | 805 | 861  |
| LinJ33_V3.1080 | <i>L. infantum</i> | 47  | 1   | 47   |
| LinJ33_V3.1080 | <i>L. infantum</i> | 98  | 208 | 305  |
| LinJ33_V3.1080 | <i>L. infantum</i> | 98  | 208 | 305  |
| LinJ33_V3.1090 | <i>L. infantum</i> | 123 | 1   | 123  |
| LinJ33_V3.1100 | <i>L. infantum</i> | 57  | 1   | 57   |
| LinJ33_V3.1100 | <i>L. infantum</i> | 124 | 90  | 213  |
| LinJ33_V3.1100 | <i>L. infantum</i> | 63  | 388 | 450  |
| LinJ33_V3.1110 | <i>L. infantum</i> | 72  | 1   | 72   |
| LinJ33_V3.1120 | <i>L. infantum</i> | 121 | 1   | 121  |
| LinJ33_V3.1120 | <i>L. infantum</i> | 46  | 549 | 594  |
| LinJ33_V3.1120 | <i>L. infantum</i> | 108 | 996 | 1103 |
| LinJ33_V3.1130 | <i>L. infantum</i> | 49  | 195 | 243  |
| LinJ33_V3.1140 | <i>L. infantum</i> | 47  | 26  | 72   |
| LinJ33_V3.1140 | <i>L. infantum</i> | 64  | 92  | 155  |
| LinJ33_V3.1140 | <i>L. infantum</i> | 41  | 326 | 366  |
| LinJ33_V3.1140 | <i>L. infantum</i> | 48  | 398 | 445  |
| LinJ33_V3.1160 | <i>L. infantum</i> | 46  | 1   | 46   |
| LinJ33_V3.1160 | <i>L. infantum</i> | 106 | 111 | 216  |
| LinJ33_V3.1160 | <i>L. infantum</i> | 48  | 258 | 305  |
| LinJ33_V3.1160 | <i>L. infantum</i> | 44  | 309 | 352  |
| LinJ33_V3.1160 | <i>L. infantum</i> | 100 | 505 | 604  |
| LinJ33_V3.1160 | <i>L. infantum</i> | 267 | 639 | 905  |
| LinJ33_V3.1170 | <i>L. infantum</i> | 71  | 94  | 164  |
| LinJ33_V3.1170 | <i>L. infantum</i> | 42  | 188 | 229  |
| LinJ33_V3.1170 | <i>L. infantum</i> | 159 | 297 | 455  |
| LinJ33_V3.1170 | <i>L. infantum</i> | 273 | 489 | 761  |
| LinJ33_V3.1180 | <i>L. infantum</i> | 237 | 1   | 237  |
| LinJ33_V3.1180 | <i>L. infantum</i> | 75  | 259 | 333  |
| LinJ33_V3.1190 | <i>L. infantum</i> | 46  | 563 | 608  |
| LinJ33_V3.1210 | <i>L. infantum</i> | 73  | 1   | 73   |
| LinJ33_V3.1210 | <i>L. infantum</i> | 92  | 78  | 169  |
| LinJ33_V3.1210 | <i>L. infantum</i> | 72  | 185 | 256  |
| LinJ33_V3.1210 | <i>L. infantum</i> | 116 | 278 | 393  |
| LinJ33_V3.1210 | <i>L. infantum</i> | 44  | 794 | 837  |
| LinJ33_V3.1220 | <i>L. infantum</i> | 51  | 1   | 51   |
| LinJ33_V3.1230 | <i>L. infantum</i> | 160 | 1   | 160  |
| LinJ33_V3.1230 | <i>L. infantum</i> | 54  | 191 | 244  |

|                |                    |     |      |      |
|----------------|--------------------|-----|------|------|
| LinJ33_V3.1230 | <i>L. infantum</i> | 121 | 285  | 405  |
| LinJ33_V3.1230 | <i>L. infantum</i> | 51  | 444  | 494  |
| LinJ33_V3.1230 | <i>L. infantum</i> | 110 | 746  | 855  |
| LinJ33_V3.1230 | <i>L. infantum</i> | 70  | 1110 | 1179 |
| LinJ33_V3.1240 | <i>L. infantum</i> | 51  | 20   | 70   |
| LinJ33_V3.1240 | <i>L. infantum</i> | 99  | 149  | 247  |
| LinJ33_V3.1240 | <i>L. infantum</i> | 99  | 149  | 247  |
| LinJ33_V3.1250 | <i>L. infantum</i> | 44  | 135  | 178  |
| LinJ33_V3.1250 | <i>L. infantum</i> | 40  | 387  | 426  |
| LinJ33_V3.1250 | <i>L. infantum</i> | 103 | 477  | 579  |
| LinJ33_V3.1260 | <i>L. infantum</i> | 51  | 137  | 187  |
| LinJ33_V3.1260 | <i>L. infantum</i> | 84  | 416  | 499  |
| LinJ33_V3.1270 | <i>L. infantum</i> | 94  | 191  | 284  |
| LinJ33_V3.1280 | <i>L. infantum</i> | 59  | 1    | 59   |
| LinJ33_V3.1280 | <i>L. infantum</i> | 215 | 263  | 477  |
| LinJ33_V3.1280 | <i>L. infantum</i> | 75  | 522  | 596  |
| LinJ33_V3.1280 | <i>L. infantum</i> | 66  | 643  | 708  |
| LinJ33_V3.1290 | <i>L. infantum</i> | 221 | 401  | 621  |
| LinJ33_V3.1300 | <i>L. infantum</i> | 53  | 58   | 110  |
| LinJ33_V3.1300 | <i>L. infantum</i> | 48  | 386  | 433  |
| LinJ33_V3.1300 | <i>L. infantum</i> | 47  | 440  | 486  |
| LinJ33_V3.1300 | <i>L. infantum</i> | 227 | 533  | 759  |
| LinJ33_V3.1300 | <i>L. infantum</i> | 75  | 782  | 856  |
| LinJ33_V3.1310 | <i>L. infantum</i> | 262 | 1    | 262  |
| LinJ33_V3.1310 | <i>L. infantum</i> | 57  | 307  | 363  |
| LinJ33_V3.1330 | <i>L. infantum</i> | 42  | 90   | 131  |
| LinJ33_V3.1330 | <i>L. infantum</i> | 350 | 213  | 562  |
| LinJ33_V3.1330 | <i>L. infantum</i> | 410 | 567  | 976  |
| LinJ33_V3.1340 | <i>L. infantum</i> | 55  | 250  | 304  |
| LinJ33_V3.1350 | <i>L. infantum</i> | 47  | 16   | 62   |
| LinJ33_V3.1360 | <i>L. infantum</i> | 109 | 1    | 109  |
| LinJ33_V3.1360 | <i>L. infantum</i> | 90  | 502  | 591  |
| LinJ33_V3.1360 | <i>L. infantum</i> | 90  | 502  | 591  |
| LinJ33_V3.1370 | <i>L. infantum</i> | 44  | 314  | 357  |
| LinJ33_V3.1380 | <i>L. infantum</i> | 161 | 1    | 161  |
| LinJ33_V3.1400 | <i>L. infantum</i> | 58  | 37   | 94   |
| LinJ33_V3.1400 | <i>L. infantum</i> | 44  | 125  | 168  |
| LinJ33_V3.1400 | <i>L. infantum</i> | 44  | 125  | 168  |
| LinJ33_V3.1420 | <i>L. infantum</i> | 86  | 1    | 86   |
| LinJ33_V3.1420 | <i>L. infantum</i> | 53  | 140  | 192  |
| LinJ33_V3.1420 | <i>L. infantum</i> | 53  | 140  | 192  |
| LinJ33_V3.1450 | <i>L. infantum</i> | 46  | 78   | 123  |
| LinJ33_V3.1450 | <i>L. infantum</i> | 78  | 171  | 248  |
| LinJ33_V3.1450 | <i>L. infantum</i> | 48  | 389  | 436  |
| LinJ33_V3.1460 | <i>L. infantum</i> | 339 | 86   | 424  |
| LinJ33_V3.1470 | <i>L. infantum</i> | 61  | 348  | 408  |
| LinJ33_V3.1480 | <i>L. infantum</i> | 113 | 49   | 161  |

|                |                    |     |      |      |
|----------------|--------------------|-----|------|------|
| LinJ33_V3.1490 | <i>L. infantum</i> | 64  | 1    | 64   |
| LinJ33_V3.1490 | <i>L. infantum</i> | 96  | 136  | 231  |
| LinJ33_V3.1490 | <i>L. infantum</i> | 105 | 273  | 377  |
| LinJ33_V3.1490 | <i>L. infantum</i> | 225 | 400  | 624  |
| LinJ33_V3.1490 | <i>L. infantum</i> | 157 | 684  | 840  |
| LinJ33_V3.1490 | <i>L. infantum</i> | 127 | 946  | 1072 |
| LinJ33_V3.1490 | <i>L. infantum</i> | 87  | 1128 | 1214 |
| LinJ33_V3.1490 | <i>L. infantum</i> | 742 | 1228 | 1969 |
| LinJ33_V3.1500 | <i>L. infantum</i> | 227 | 54   | 280  |
| LinJ33_V3.1500 | <i>L. infantum</i> | 47  | 519  | 565  |
| LinJ33_V3.1520 | <i>L. infantum</i> | 42  | 74   | 115  |
| LinJ33_V3.1520 | <i>L. infantum</i> | 68  | 136  | 203  |
| LinJ33_V3.1520 | <i>L. infantum</i> | 45  | 233  | 277  |
| LinJ33_V3.1520 | <i>L. infantum</i> | 47  | 305  | 351  |
| LinJ33_V3.1520 | <i>L. infantum</i> | 99  | 380  | 478  |
| LinJ33_V3.1530 | <i>L. infantum</i> | 49  | 1    | 49   |
| LinJ33_V3.1530 | <i>L. infantum</i> | 202 | 60   | 261  |
| LinJ33_V3.1530 | <i>L. infantum</i> | 52  | 281  | 332  |
| LinJ33_V3.1530 | <i>L. infantum</i> | 60  | 374  | 433  |
| LinJ33_V3.1530 | <i>L. infantum</i> | 68  | 463  | 530  |
| LinJ33_V3.1540 | <i>L. infantum</i> | 44  | 28   | 71   |
| LinJ33_V3.1550 | <i>L. infantum</i> | 117 | 93   | 209  |
| LinJ33_V3.1550 | <i>L. infantum</i> | 101 | 230  | 330  |
| LinJ33_V3.1550 | <i>L. infantum</i> | 101 | 230  | 330  |
| LinJ33_V3.1570 | <i>L. infantum</i> | 110 | 1    | 110  |
| LinJ33_V3.1570 | <i>L. infantum</i> | 209 | 121  | 329  |
| LinJ33_V3.1570 | <i>L. infantum</i> | 102 | 412  | 513  |
| LinJ33_V3.1570 | <i>L. infantum</i> | 96  | 553  | 648  |
| LinJ33_V3.1570 | <i>L. infantum</i> | 113 | 716  | 828  |
| LinJ33_V3.1570 | <i>L. infantum</i> | 46  | 880  | 925  |
| LinJ33_V3.1570 | <i>L. infantum</i> | 199 | 956  | 1154 |
| LinJ33_V3.1570 | <i>L. infantum</i> | 87  | 1166 | 1252 |
| LinJ33_V3.1570 | <i>L. infantum</i> | 63  | 1496 | 1558 |
| LinJ33_V3.1570 | <i>L. infantum</i> | 240 | 1772 | 2011 |
| LinJ33_V3.1570 | <i>L. infantum</i> | 48  | 2064 | 2111 |
| LinJ33_V3.1570 | <i>L. infantum</i> | 73  | 2240 | 2312 |
| LinJ33_V3.1570 | <i>L. infantum</i> | 330 | 2490 | 2819 |
| LinJ33_V3.1570 | <i>L. infantum</i> | 67  | 2917 | 2983 |
| LinJ33_V3.1570 | <i>L. infantum</i> | 131 | 3091 | 3221 |
| LinJ33_V3.1570 | <i>L. infantum</i> | 65  | 3274 | 3338 |
| LinJ33_V3.1580 | <i>L. infantum</i> | 52  | 46   | 97   |
| LinJ33_V3.1580 | <i>L. infantum</i> | 46  | 391  | 436  |
| LinJ33_V3.1580 | <i>L. infantum</i> | 51  | 607  | 657  |
| LinJ33_V3.1580 | <i>L. infantum</i> | 65  | 694  | 758  |
| LinJ33_V3.1590 | <i>L. infantum</i> | 50  | 18   | 67   |
| LinJ33_V3.1590 | <i>L. infantum</i> | 92  | 112  | 203  |
| LinJ33_V3.1590 | <i>L. infantum</i> | 58  | 239  | 296  |

|                |                    |     |      |      |
|----------------|--------------------|-----|------|------|
| LinJ33_V3.1590 | <i>L. infantum</i> | 55  | 555  | 609  |
| LinJ33_V3.1640 | <i>L. infantum</i> | 51  | 130  | 180  |
| LinJ33_V3.1640 | <i>L. infantum</i> | 73  | 212  | 284  |
| LinJ33_V3.1640 | <i>L. infantum</i> | 73  | 212  | 284  |
| LinJ33_V3.1650 | <i>L. infantum</i> | 52  | 268  | 319  |
| LinJ33_V3.1650 | <i>L. infantum</i> | 189 | 482  | 670  |
| LinJ33_V3.1670 | <i>L. infantum</i> | 68  | 1    | 68   |
| LinJ33_V3.1670 | <i>L. infantum</i> | 40  | 110  | 149  |
| LinJ33_V3.1670 | <i>L. infantum</i> | 106 | 274  | 379  |
| LinJ33_V3.1670 | <i>L. infantum</i> | 96  | 417  | 512  |
| LinJ33_V3.1700 | <i>L. infantum</i> | 138 | 19   | 156  |
| LinJ33_V3.1700 | <i>L. infantum</i> | 53  | 226  | 278  |
| LinJ33_V3.1700 | <i>L. infantum</i> | 62  | 304  | 365  |
| LinJ33_V3.1700 | <i>L. infantum</i> | 51  | 718  | 768  |
| LinJ33_V3.1760 | <i>L. infantum</i> | 68  | 137  | 204  |
| LinJ33_V3.1800 | <i>L. infantum</i> | 42  | 110  | 151  |
| LinJ33_V3.1800 | <i>L. infantum</i> | 66  | 851  | 916  |
| LinJ33_V3.1800 | <i>L. infantum</i> | 66  | 851  | 916  |
| LinJ33_V3.1810 | <i>L. infantum</i> | 47  | 301  | 347  |
| LinJ33_V3.1830 | <i>L. infantum</i> | 67  | 827  | 893  |
| LinJ33_V3.1880 | <i>L. infantum</i> | 100 | 1    | 100  |
| LinJ33_V3.1880 | <i>L. infantum</i> | 117 | 290  | 406  |
| LinJ33_V3.1880 | <i>L. infantum</i> | 55  | 1097 | 1151 |
| LinJ33_V3.1880 | <i>L. infantum</i> | 104 | 1528 | 1631 |
| LinJ33_V3.1930 | <i>L. infantum</i> | 55  | 298  | 352  |
| LinJ33_V3.1930 | <i>L. infantum</i> | 297 | 387  | 683  |
| LinJ33_V3.1930 | <i>L. infantum</i> | 252 | 707  | 958  |
| LinJ33_V3.1950 | <i>L. infantum</i> | 67  | 62   | 128  |
| LinJ33_V3.1970 | <i>L. infantum</i> | 59  | 365  | 423  |
| LinJ33_V3.1970 | <i>L. infantum</i> | 154 | 499  | 652  |
| LinJ33_V3.1990 | <i>L. infantum</i> | 45  | 63   | 107  |
| LinJ33_V3.1990 | <i>L. infantum</i> | 75  | 191  | 265  |
| LinJ33_V3.1990 | <i>L. infantum</i> | 43  | 311  | 353  |
| LinJ33_V3.1990 | <i>L. infantum</i> | 114 | 363  | 476  |
| LinJ33_V3.2010 | <i>L. infantum</i> | 68  | 1    | 68   |
| LinJ33_V3.2010 | <i>L. infantum</i> | 53  | 72   | 124  |
| LinJ33_V3.2010 | <i>L. infantum</i> | 49  | 156  | 204  |
| LinJ33_V3.2020 | <i>L. infantum</i> | 124 | 1    | 124  |
| LinJ33_V3.2020 | <i>L. infantum</i> | 40  | 216  | 255  |
| LinJ33_V3.2050 | <i>L. infantum</i> | 112 | 1    | 112  |
| LinJ33_V3.2060 | <i>L. infantum</i> | 55  | 23   | 77   |
| LinJ33_V3.2060 | <i>L. infantum</i> | 70  | 229  | 298  |
| LinJ33_V3.2060 | <i>L. infantum</i> | 104 | 551  | 654  |
| LinJ33_V3.2080 | <i>L. infantum</i> | 127 | 1    | 127  |
| LinJ33_V3.2080 | <i>L. infantum</i> | 305 | 161  | 465  |
| LinJ33_V3.2090 | <i>L. infantum</i> | 77  | 197  | 273  |
| LinJ33_V3.2090 | <i>L. infantum</i> | 154 | 342  | 495  |

|                |                    |     |      |      |
|----------------|--------------------|-----|------|------|
| LinJ33_V3.2110 | <i>L. infantum</i> | 54  | 1    | 54   |
| LinJ33_V3.2110 | <i>L. infantum</i> | 127 | 216  | 342  |
| LinJ33_V3.2110 | <i>L. infantum</i> | 66  | 372  | 437  |
| LinJ33_V3.2110 | <i>L. infantum</i> | 88  | 532  | 619  |
| LinJ33_V3.2130 | <i>L. infantum</i> | 188 | 46   | 233  |
| LinJ33_V3.2140 | <i>L. infantum</i> | 46  | 1    | 46   |
| LinJ33_V3.2140 | <i>L. infantum</i> | 464 | 48   | 511  |
| LinJ33_V3.2140 | <i>L. infantum</i> | 96  | 702  | 797  |
| LinJ33_V3.2150 | <i>L. infantum</i> | 40  | 1    | 40   |
| LinJ33_V3.2150 | <i>L. infantum</i> | 106 | 241  | 346  |
| LinJ33_V3.2150 | <i>L. infantum</i> | 49  | 747  | 795  |
| LinJ33_V3.2160 | <i>L. infantum</i> | 41  | 550  | 590  |
| LinJ33_V3.2160 | <i>L. infantum</i> | 49  | 690  | 738  |
| LinJ33_V3.2160 | <i>L. infantum</i> | 49  | 690  | 738  |
| LinJ33_V3.2170 | <i>L. infantum</i> | 40  | 183  | 222  |
| LinJ33_V3.2170 | <i>L. infantum</i> | 43  | 319  | 361  |
| LinJ33_V3.2170 | <i>L. infantum</i> | 43  | 319  | 361  |
| LinJ33_V3.2190 | <i>L. infantum</i> | 435 | 413  | 847  |
| LinJ33_V3.2190 | <i>L. infantum</i> | 56  | 858  | 913  |
| LinJ33_V3.2200 | <i>L. infantum</i> | 71  | 92   | 162  |
| LinJ33_V3.2200 | <i>L. infantum</i> | 114 | 286  | 399  |
| LinJ33_V3.2200 | <i>L. infantum</i> | 103 | 402  | 504  |
| LinJ33_V3.2200 | <i>L. infantum</i> | 205 | 544  | 748  |
| LinJ33_V3.2200 | <i>L. infantum</i> | 61  | 1063 | 1123 |
| LinJ33_V3.2200 | <i>L. infantum</i> | 46  | 1171 | 1216 |
| LinJ33_V3.2210 | <i>L. infantum</i> | 171 | 80   | 250  |
| LinJ33_V3.2210 | <i>L. infantum</i> | 62  | 863  | 924  |
| LinJ33_V3.2210 | <i>L. infantum</i> | 62  | 863  | 924  |
| LinJ33_V3.2220 | <i>L. infantum</i> | 74  | 203  | 276  |
| LinJ33_V3.2220 | <i>L. infantum</i> | 119 | 384  | 502  |
| LinJ33_V3.2230 | <i>L. infantum</i> | 179 | 1    | 179  |
| LinJ33_V3.2230 | <i>L. infantum</i> | 56  | 276  | 331  |
| LinJ33_V3.2240 | <i>L. infantum</i> | 143 | 1    | 143  |
| LinJ33_V3.2250 | <i>L. infantum</i> | 89  | 1    | 89   |
| LinJ33_V3.2250 | <i>L. infantum</i> | 177 | 97   | 273  |
| LinJ33_V3.2250 | <i>L. infantum</i> | 202 | 382  | 583  |
| LinJ33_V3.2250 | <i>L. infantum</i> | 145 | 701  | 845  |
| LinJ33_V3.2250 | <i>L. infantum</i> | 66  | 855  | 920  |
| LinJ33_V3.2260 | <i>L. infantum</i> | 49  | 400  | 448  |
| LinJ33_V3.2260 | <i>L. infantum</i> | 422 | 539  | 960  |
| LinJ33_V3.2270 | <i>L. infantum</i> | 216 | 113  | 328  |
| LinJ33_V3.2270 | <i>L. infantum</i> | 46  | 488  | 533  |
| LinJ33_V3.2290 | <i>L. infantum</i> | 44  | 82   | 125  |
| LinJ33_V3.2290 | <i>L. infantum</i> | 144 | 173  | 316  |
| LinJ33_V3.2290 | <i>L. infantum</i> | 52  | 352  | 403  |
| LinJ33_V3.2290 | <i>L. infantum</i> | 88  | 494  | 581  |
| LinJ33_V3.2290 | <i>L. infantum</i> | 52  | 645  | 696  |

|                |                    |     |      |      |
|----------------|--------------------|-----|------|------|
| LinJ33_V3.2290 | <i>L. infantum</i> | 144 | 699  | 842  |
| LinJ33_V3.2290 | <i>L. infantum</i> | 302 | 1156 | 1457 |
| LinJ33_V3.2300 | <i>L. infantum</i> | 265 | 72   | 336  |
| LinJ33_V3.2300 | <i>L. infantum</i> | 265 | 373  | 637  |
| LinJ33_V3.2300 | <i>L. infantum</i> | 63  | 756  | 818  |
| LinJ33_V3.2300 | <i>L. infantum</i> | 84  | 854  | 937  |
| LinJ33_V3.2300 | <i>L. infantum</i> | 48  | 975  | 1022 |
| LinJ33_V3.2300 | <i>L. infantum</i> | 41  | 1059 | 1099 |
| LinJ33_V3.2300 | <i>L. infantum</i> | 77  | 1181 | 1257 |
| LinJ33_V3.2310 | <i>L. infantum</i> | 46  | 1    | 46   |
| LinJ33_V3.2310 | <i>L. infantum</i> | 177 | 64   | 240  |
| LinJ33_V3.2310 | <i>L. infantum</i> | 201 | 286  | 486  |
| LinJ33_V3.2310 | <i>L. infantum</i> | 101 | 513  | 613  |
| LinJ33_V3.2310 | <i>L. infantum</i> | 117 | 628  | 744  |
| LinJ33_V3.2320 | <i>L. infantum</i> | 299 | 1    | 299  |
| LinJ33_V3.2320 | <i>L. infantum</i> | 73  | 316  | 388  |
| LinJ33_V3.2330 | <i>L. infantum</i> | 168 | 1    | 168  |
| LinJ33_V3.2340 | <i>L. infantum</i> | 72  | 1    | 72   |
| LinJ33_V3.2350 | <i>L. infantum</i> | 146 | 40   | 185  |
| LinJ33_V3.2350 | <i>L. infantum</i> | 182 | 214  | 395  |
| LinJ33_V3.2350 | <i>L. infantum</i> | 116 | 467  | 582  |
| LinJ33_V3.2350 | <i>L. infantum</i> | 104 | 603  | 706  |
| LinJ33_V3.2360 | <i>L. infantum</i> | 256 | 1    | 256  |
| LinJ33_V3.2360 | <i>L. infantum</i> | 135 | 267  | 401  |
| LinJ33_V3.2370 | <i>L. infantum</i> | 57  | 171  | 227  |
| LinJ33_V3.2380 | <i>L. infantum</i> | 112 | 116  | 227  |
| LinJ33_V3.2380 | <i>L. infantum</i> | 176 | 280  | 455  |
| LinJ33_V3.2390 | <i>L. infantum</i> | 72  | 128  | 199  |
| LinJ33_V3.2390 | <i>L. infantum</i> | 78  | 307  | 384  |
| LinJ33_V3.2400 | <i>L. infantum</i> | 64  | 1    | 64   |
| LinJ33_V3.2400 | <i>L. infantum</i> | 310 | 106  | 415  |
| LinJ33_V3.2400 | <i>L. infantum</i> | 90  | 451  | 540  |
| LinJ33_V3.2410 | <i>L. infantum</i> | 42  | 932  | 973  |
| LinJ33_V3.2440 | <i>L. infantum</i> | 41  | 54   | 94   |
| LinJ33_V3.2440 | <i>L. infantum</i> | 231 | 133  | 363  |
| LinJ33_V3.2450 | <i>L. infantum</i> | 103 | 144  | 246  |
| LinJ33_V3.2450 | <i>L. infantum</i> | 82  | 585  | 666  |
| LinJ33_V3.2460 | <i>L. infantum</i> | 278 | 1    | 278  |
| LinJ33_V3.2460 | <i>L. infantum</i> | 60  | 355  | 414  |
| LinJ33_V3.2460 | <i>L. infantum</i> | 76  | 444  | 519  |
| LinJ33_V3.2460 | <i>L. infantum</i> | 148 | 761  | 908  |
| LinJ33_V3.2460 | <i>L. infantum</i> | 45  | 910  | 954  |
| LinJ33_V3.2460 | <i>L. infantum</i> | 79  | 987  | 1065 |
| LinJ33_V3.2480 | <i>L. infantum</i> | 116 | 1    | 116  |
| LinJ33_V3.2480 | <i>L. infantum</i> | 234 | 604  | 837  |
| LinJ33_V3.2490 | <i>L. infantum</i> | 449 | 83   | 531  |
| LinJ33_V3.2490 | <i>L. infantum</i> | 91  | 708  | 798  |

|                |                    |     |      |      |
|----------------|--------------------|-----|------|------|
| LinJ33_V3.2490 | <i>L. infantum</i> | 79  | 838  | 916  |
| LinJ33_V3.2490 | <i>L. infantum</i> | 85  | 1209 | 1293 |
| LinJ33_V3.2500 | <i>L. infantum</i> | 43  | 1    | 43   |
| LinJ33_V3.2500 | <i>L. infantum</i> | 162 | 192  | 353  |
| LinJ33_V3.2510 | <i>L. infantum</i> | 154 | 288  | 441  |
| LinJ33_V3.2510 | <i>L. infantum</i> | 96  | 447  | 542  |
| LinJ33_V3.2530 | <i>L. infantum</i> | 84  | 1    | 84   |
| LinJ33_V3.2530 | <i>L. infantum</i> | 59  | 90   | 148  |
| LinJ33_V3.2530 | <i>L. infantum</i> | 59  | 90   | 148  |
| LinJ33_V3.2540 | <i>L. infantum</i> | 58  | 665  | 722  |
| LinJ33_V3.2550 | <i>L. infantum</i> | 157 | 1    | 157  |
| LinJ33_V3.2550 | <i>L. infantum</i> | 98  | 162  | 259  |
| LinJ33_V3.2550 | <i>L. infantum</i> | 226 | 379  | 604  |
| LinJ33_V3.2560 | <i>L. infantum</i> | 57  | 525  | 581  |
| LinJ33_V3.2570 | <i>L. infantum</i> | 140 | 1    | 140  |
| LinJ33_V3.2570 | <i>L. infantum</i> | 88  | 170  | 257  |
| LinJ33_V3.2570 | <i>L. infantum</i> | 57  | 268  | 324  |
| LinJ33_V3.2570 | <i>L. infantum</i> | 168 | 339  | 506  |
| LinJ33_V3.2580 | <i>L. infantum</i> | 65  | 342  | 406  |
| LinJ33_V3.2580 | <i>L. infantum</i> | 269 | 447  | 715  |
| LinJ33_V3.2580 | <i>L. infantum</i> | 72  | 751  | 822  |
| LinJ33_V3.2580 | <i>L. infantum</i> | 51  | 885  | 935  |
| LinJ33_V3.2580 | <i>L. infantum</i> | 88  | 981  | 1068 |
| LinJ33_V3.2580 | <i>L. infantum</i> | 278 | 1117 | 1394 |
| LinJ33_V3.2580 | <i>L. infantum</i> | 238 | 1404 | 1641 |
| LinJ33_V3.2590 | <i>L. infantum</i> | 67  | 55   | 121  |
| LinJ33_V3.2590 | <i>L. infantum</i> | 47  | 270  | 316  |
| LinJ33_V3.2590 | <i>L. infantum</i> | 82  | 445  | 526  |
| LinJ33_V3.2590 | <i>L. infantum</i> | 40  | 927  | 966  |
| LinJ33_V3.2590 | <i>L. infantum</i> | 62  | 990  | 1051 |
| LinJ33_V3.2610 | <i>L. infantum</i> | 44  | 1    | 44   |
| LinJ33_V3.2610 | <i>L. infantum</i> | 90  | 69   | 158  |
| LinJ33_V3.2610 | <i>L. infantum</i> | 42  | 368  | 409  |
| LinJ33_V3.2620 | <i>L. infantum</i> | 178 | 39   | 216  |
| LinJ33_V3.2620 | <i>L. infantum</i> | 48  | 305  | 352  |
| LinJ33_V3.2620 | <i>L. infantum</i> | 80  | 398  | 477  |
| LinJ33_V3.2620 | <i>L. infantum</i> | 45  | 643  | 687  |
| LinJ33_V3.2640 | <i>L. infantum</i> | 54  | 47   | 100  |
| LinJ33_V3.2640 | <i>L. infantum</i> | 68  | 250  | 317  |
| LinJ33_V3.2640 | <i>L. infantum</i> | 63  | 354  | 416  |
| LinJ33_V3.2660 | <i>L. infantum</i> | 73  | 1    | 73   |
| LinJ33_V3.2660 | <i>L. infantum</i> | 52  | 187  | 238  |
| LinJ33_V3.2660 | <i>L. infantum</i> | 42  | 567  | 608  |
| LinJ33_V3.2660 | <i>L. infantum</i> | 64  | 999  | 1062 |
| LinJ33_V3.2660 | <i>L. infantum</i> | 147 | 1104 | 1250 |
| LinJ33_V3.2690 | <i>L. infantum</i> | 43  | 1    | 43   |
| LinJ33_V3.2690 | <i>L. infantum</i> | 68  | 285  | 352  |



|                |                    |     |      |      |
|----------------|--------------------|-----|------|------|
| LinJ33_V3.2690 | <i>L. infantum</i> | 54  | 384  | 437  |
| LinJ33_V3.2690 | <i>L. infantum</i> | 202 | 477  | 678  |
| LinJ33_V3.2690 | <i>L. infantum</i> | 71  | 722  | 792  |
| LinJ33_V3.2690 | <i>L. infantum</i> | 310 | 867  | 1176 |
| LinJ33_V3.2690 | <i>L. infantum</i> | 48  | 1652 | 1699 |
| LinJ33_V3.2720 | <i>L. infantum</i> | 133 | 1    | 133  |
| LinJ33_V3.2720 | <i>L. infantum</i> | 53  | 251  | 303  |
| LinJ33_V3.2730 | <i>L. infantum</i> | 49  | 1    | 49   |
| LinJ33_V3.2730 | <i>L. infantum</i> | 40  | 190  | 229  |
| LinJ33_V3.2730 | <i>L. infantum</i> | 192 | 367  | 558  |
| LinJ33_V3.2730 | <i>L. infantum</i> | 126 | 620  | 745  |
| LinJ33_V3.2730 | <i>L. infantum</i> | 69  | 850  | 918  |
| LinJ33_V3.2730 | <i>L. infantum</i> | 118 | 1011 | 1128 |
| LinJ33_V3.2740 | <i>L. infantum</i> | 49  | 481  | 529  |
| LinJ33_V3.2750 | <i>L. infantum</i> | 40  | 217  | 256  |
| LinJ33_V3.2760 | <i>L. infantum</i> | 75  | 381  | 455  |
| LinJ33_V3.2770 | <i>L. infantum</i> | 273 | 1    | 273  |
| LinJ33_V3.2770 | <i>L. infantum</i> | 160 | 314  | 473  |
| LinJ33_V3.2770 | <i>L. infantum</i> | 90  | 520  | 609  |
| LinJ33_V3.2770 | <i>L. infantum</i> | 55  | 834  | 888  |
| LinJ33_V3.2780 | <i>L. infantum</i> | 174 | 1    | 174  |
| LinJ33_V3.2790 | <i>L. infantum</i> | 45  | 175  | 219  |
| LinJ33_V3.2790 | <i>L. infantum</i> | 43  | 389  | 431  |
| LinJ33_V3.2790 | <i>L. infantum</i> | 47  | 669  | 715  |
| LinJ33_V3.2810 | <i>L. infantum</i> | 615 | 1    | 615  |
| LinJ33_V3.2810 | <i>L. infantum</i> | 197 | 617  | 813  |
| LinJ33_V3.2810 | <i>L. infantum</i> | 204 | 869  | 1072 |
| LinJ33_V3.2810 | <i>L. infantum</i> | 114 | 1115 | 1228 |
| LinJ33_V3.2820 | <i>L. infantum</i> | 119 | 18   | 136  |
| LinJ33_V3.2820 | <i>L. infantum</i> | 178 | 145  | 322  |
| LinJ33_V3.2820 | <i>L. infantum</i> | 294 | 362  | 655  |
| LinJ33_V3.2820 | <i>L. infantum</i> | 154 | 681  | 834  |
| LinJ33_V3.2830 | <i>L. infantum</i> | 41  | 1    | 41   |
| LinJ33_V3.2830 | <i>L. infantum</i> | 75  | 134  | 208  |
| LinJ33_V3.2830 | <i>L. infantum</i> | 75  | 134  | 208  |
| LinJ33_V3.2840 | <i>L. infantum</i> | 62  | 542  | 603  |
| LinJ33_V3.2840 | <i>L. infantum</i> | 105 | 690  | 794  |
| LinJ33_V3.2850 | <i>L. infantum</i> | 51  | 70   | 120  |
| LinJ33_V3.2880 | <i>L. infantum</i> | 226 | 1    | 226  |
| LinJ33_V3.2890 | <i>L. infantum</i> | 58  | 42   | 99   |
| LinJ33_V3.2890 | <i>L. infantum</i> | 58  | 207  | 264  |
| LinJ33_V3.2890 | <i>L. infantum</i> | 43  | 306  | 348  |
| LinJ33_V3.2890 | <i>L. infantum</i> | 93  | 356  | 448  |
| LinJ33_V3.2890 | <i>L. infantum</i> | 63  | 732  | 794  |
| LinJ33_V3.2890 | <i>L. infantum</i> | 93  | 897  | 989  |
| LinJ33_V3.2900 | <i>L. infantum</i> | 305 | 1    | 305  |
| LinJ33_V3.2900 | <i>L. infantum</i> | 70  | 472  | 541  |

|                |                    |     |      |      |
|----------------|--------------------|-----|------|------|
| LinJ33_V3.2900 | <i>L. infantum</i> | 43  | 716  | 758  |
| LinJ33_V3.2910 | <i>L. infantum</i> | 41  | 1    | 41   |
| LinJ33_V3.2910 | <i>L. infantum</i> | 80  | 162  | 241  |
| LinJ33_V3.2920 | <i>L. infantum</i> | 54  | 29   | 82   |
| LinJ33_V3.2920 | <i>L. infantum</i> | 112 | 294  | 405  |
| LinJ33_V3.2920 | <i>L. infantum</i> | 86  | 526  | 611  |
| LinJ33_V3.2920 | <i>L. infantum</i> | 49  | 658  | 706  |
| LinJ33_V3.2920 | <i>L. infantum</i> | 218 | 769  | 986  |
| LinJ33_V3.2920 | <i>L. infantum</i> | 42  | 1086 | 1127 |
| LinJ33_V3.2920 | <i>L. infantum</i> | 68  | 1266 | 1333 |
| LinJ33_V3.2920 | <i>L. infantum</i> | 71  | 1913 | 1983 |
| LinJ33_V3.2920 | <i>L. infantum</i> | 251 | 2474 | 2724 |
| LinJ33_V3.2920 | <i>L. infantum</i> | 379 | 2871 | 3249 |
| LinJ33_V3.2920 | <i>L. infantum</i> | 191 | 3350 | 3540 |
| LinJ33_V3.2920 | <i>L. infantum</i> | 75  | 3887 | 3961 |
| LinJ33_V3.2920 | <i>L. infantum</i> | 77  | 4071 | 4147 |
| LinJ33_V3.2920 | <i>L. infantum</i> | 83  | 4540 | 4622 |
| LinJ33_V3.2920 | <i>L. infantum</i> | 56  | 4995 | 5050 |
| LinJ33_V3.2930 | <i>L. infantum</i> | 57  | 194  | 250  |
| LinJ33_V3.2930 | <i>L. infantum</i> | 61  | 292  | 352  |
| LinJ33_V3.2930 | <i>L. infantum</i> | 52  | 429  | 480  |
| LinJ33_V3.2950 | <i>L. infantum</i> | 89  | 87   | 175  |
| LinJ33_V3.2950 | <i>L. infantum</i> | 68  | 246  | 313  |
| LinJ33_V3.2960 | <i>L. infantum</i> | 223 | 75   | 297  |
| LinJ33_V3.2960 | <i>L. infantum</i> | 60  | 494  | 553  |
| LinJ33_V3.2970 | <i>L. infantum</i> | 94  | 1    | 94   |
| LinJ33_V3.2980 | <i>L. infantum</i> | 124 | 78   | 201  |
| LinJ33_V3.2980 | <i>L. infantum</i> | 110 | 328  | 437  |
| LinJ33_V3.3000 | <i>L. infantum</i> | 78  | 25   | 102  |
| LinJ33_V3.3010 | <i>L. infantum</i> | 78  | 1    | 78   |
| LinJ33_V3.3010 | <i>L. infantum</i> | 40  | 340  | 379  |
| LinJ33_V3.3030 | <i>L. infantum</i> | 55  | 1    | 55   |
| LinJ33_V3.3030 | <i>L. infantum</i> | 67  | 174  | 240  |
| LinJ33_V3.3030 | <i>L. infantum</i> | 74  | 253  | 326  |
| LinJ33_V3.3030 | <i>L. infantum</i> | 66  | 349  | 414  |
| LinJ33_V3.3040 | <i>L. infantum</i> | 42  | 22   | 63   |
| LinJ33_V3.3040 | <i>L. infantum</i> | 81  | 76   | 156  |
| LinJ33_V3.3040 | <i>L. infantum</i> | 98  | 190  | 287  |
| LinJ33_V3.3040 | <i>L. infantum</i> | 50  | 325  | 374  |
| LinJ33_V3.3040 | <i>L. infantum</i> | 440 | 423  | 862  |
| LinJ33_V3.3040 | <i>L. infantum</i> | 134 | 873  | 1006 |
| LinJ33_V3.3040 | <i>L. infantum</i> | 145 | 1009 | 1153 |
| LinJ33_V3.3040 | <i>L. infantum</i> | 90  | 1159 | 1248 |
| LinJ33_V3.3040 | <i>L. infantum</i> | 388 | 1522 | 1909 |
| LinJ33_V3.3040 | <i>L. infantum</i> | 98  | 2279 | 2376 |
| LinJ33_V3.3040 | <i>L. infantum</i> | 41  | 2663 | 2703 |
| LinJ33_V3.3050 | <i>L. infantum</i> | 72  | 1    | 72   |

|                |                    |     |      |      |
|----------------|--------------------|-----|------|------|
| LinJ33_V3.3050 | <i>L. infantum</i> | 203 | 77   | 279  |
| LinJ33_V3.3050 | <i>L. infantum</i> | 107 | 307  | 413  |
| LinJ33_V3.3050 | <i>L. infantum</i> | 203 | 448  | 650  |
| LinJ33_V3.3050 | <i>L. infantum</i> | 447 | 673  | 1119 |
| LinJ33_V3.3050 | <i>L. infantum</i> | 52  | 1233 | 1284 |
| LinJ33_V3.3050 | <i>L. infantum</i> | 69  | 1644 | 1712 |
| LinJ33_V3.3050 | <i>L. infantum</i> | 41  | 1846 | 1886 |
| LinJ33_V3.3050 | <i>L. infantum</i> | 75  | 2120 | 2194 |
| LinJ33_V3.3050 | <i>L. infantum</i> | 49  | 2232 | 2280 |
| LinJ33_V3.3060 | <i>L. infantum</i> | 258 | 1    | 258  |
| LinJ33_V3.3060 | <i>L. infantum</i> | 120 | 266  | 385  |
| LinJ33_V3.3060 | <i>L. infantum</i> | 42  | 404  | 445  |
| LinJ33_V3.3060 | <i>L. infantum</i> | 101 | 698  | 798  |
| LinJ33_V3.3060 | <i>L. infantum</i> | 188 | 1066 | 1253 |
| LinJ33_V3.3070 | <i>L. infantum</i> | 287 | 1    | 287  |
| LinJ33_V3.3070 | <i>L. infantum</i> | 121 | 326  | 446  |
| LinJ33_V3.3070 | <i>L. infantum</i> | 46  | 709  | 754  |
| LinJ33_V3.3070 | <i>L. infantum</i> | 63  | 761  | 823  |
| LinJ33_V3.3070 | <i>L. infantum</i> | 172 | 1096 | 1267 |
| LinJ33_V3.3070 | <i>L. infantum</i> | 48  | 1479 | 1526 |
| LinJ33_V3.3070 | <i>L. infantum</i> | 72  | 1555 | 1626 |
| LinJ33_V3.3080 | <i>L. infantum</i> | 240 | 67   | 306  |
| LinJ33_V3.3090 | <i>L. infantum</i> | 95  | 1    | 95   |
| LinJ33_V3.3090 | <i>L. infantum</i> | 106 | 99   | 204  |
| LinJ33_V3.3090 | <i>L. infantum</i> | 106 | 482  | 587  |
| LinJ33_V3.3090 | <i>L. infantum</i> | 75  | 897  | 971  |
| LinJ33_V3.3100 | <i>L. infantum</i> | 200 | 1    | 200  |
| LinJ33_V3.3100 | <i>L. infantum</i> | 99  | 213  | 311  |
| LinJ33_V3.3100 | <i>L. infantum</i> | 85  | 573  | 657  |
| LinJ33_V3.3120 | <i>L. infantum</i> | 495 | 1    | 495  |
| LinJ33_V3.3120 | <i>L. infantum</i> | 75  | 715  | 789  |
| LinJ33_V3.3130 | <i>L. infantum</i> | 125 | 1    | 125  |
| LinJ33_V3.3130 | <i>L. infantum</i> | 171 | 128  | 298  |
| LinJ33_V3.3130 | <i>L. infantum</i> | 130 | 317  | 446  |
| LinJ33_V3.3130 | <i>L. infantum</i> | 77  | 477  | 553  |
| LinJ33_V3.3130 | <i>L. infantum</i> | 358 | 587  | 944  |
| LinJ33_V3.3130 | <i>L. infantum</i> | 100 | 982  | 1081 |
| LinJ33_V3.3130 | <i>L. infantum</i> | 69  | 1171 | 1239 |
| LinJ33_V3.3130 | <i>L. infantum</i> | 73  | 1269 | 1341 |
| LinJ33_V3.3140 | <i>L. infantum</i> | 112 | 1    | 112  |
| LinJ33_V3.3140 | <i>L. infantum</i> | 249 | 156  | 404  |
| LinJ33_V3.3140 | <i>L. infantum</i> | 52  | 699  | 750  |
| LinJ33_V3.3140 | <i>L. infantum</i> | 181 | 1044 | 1224 |
| LinJ33_V3.3150 | <i>L. infantum</i> | 176 | 1    | 176  |
| LinJ33_V3.3150 | <i>L. infantum</i> | 104 | 224  | 327  |
| LinJ33_V3.3160 | <i>L. infantum</i> | 321 | 1    | 321  |
| LinJ33_V3.3160 | <i>L. infantum</i> | 260 | 332  | 591  |

|                |                    |      |      |      |
|----------------|--------------------|------|------|------|
| LinJ33_V3.3160 | <i>L. infantum</i> | 59   | 962  | 1020 |
| LinJ33_V3.3170 | <i>L. infantum</i> | 45   | 44   | 88   |
| LinJ33_V3.3170 | <i>L. infantum</i> | 646  | 124  | 769  |
| LinJ33_V3.3180 | <i>L. infantum</i> | 460  | 40   | 499  |
| LinJ33_V3.3180 | <i>L. infantum</i> | 457  | 513  | 969  |
| LinJ33_V3.3190 | <i>L. infantum</i> | 99   | 1    | 99   |
| LinJ33_V3.3190 | <i>L. infantum</i> | 77   | 102  | 178  |
| LinJ33_V3.3190 | <i>L. infantum</i> | 224  | 188  | 411  |
| LinJ33_V3.3190 | <i>L. infantum</i> | 102  | 437  | 538  |
| LinJ33_V3.3200 | <i>L. infantum</i> | 48   | 277  | 324  |
| LinJ33_V3.3200 | <i>L. infantum</i> | 56   | 555  | 610  |
| LinJ33_V3.3200 | <i>L. infantum</i> | 45   | 1054 | 1098 |
| LinJ33_V3.3210 | <i>L. infantum</i> | 53   | 91   | 143  |
| LinJ33_V3.3210 | <i>L. infantum</i> | 48   | 418  | 465  |
| LinJ33_V3.3210 | <i>L. infantum</i> | 48   | 418  | 465  |
| LinJ33_V3.3230 | <i>L. infantum</i> | 114  | 1    | 114  |
| LinJ33_V3.3230 | <i>L. infantum</i> | 65   | 197  | 261  |
| LinJ33_V3.3230 | <i>L. infantum</i> | 65   | 345  | 409  |
| LinJ33_V3.3230 | <i>L. infantum</i> | 66   | 492  | 557  |
| LinJ33_V3.3230 | <i>L. infantum</i> | 65   | 641  | 705  |
| LinJ33_V3.3230 | <i>L. infantum</i> | 65   | 788  | 852  |
| LinJ33_V3.3230 | <i>L. infantum</i> | 65   | 935  | 999  |
| LinJ33_V3.3230 | <i>L. infantum</i> | 1528 | 1083 | 2610 |
| LinJ33_V3.3230 | <i>L. infantum</i> | 120  | 2708 | 2827 |
| LinJ33_V3.3230 | <i>L. infantum</i> | 243  | 3054 | 3296 |
| LinJ33_V3.3240 | <i>L. infantum</i> | 101  | 36   | 136  |
| LinJ33_V3.3240 | <i>L. infantum</i> | 48   | 259  | 306  |
| LinJ33_V3.3240 | <i>L. infantum</i> | 69   | 420  | 488  |
| LinJ33_V3.3240 | <i>L. infantum</i> | 52   | 604  | 655  |
| LinJ33_V3.3240 | <i>L. infantum</i> | 79   | 663  | 741  |
| LinJ33_V3.3240 | <i>L. infantum</i> | 240  | 765  | 1004 |
| LinJ33_V3.3240 | <i>L. infantum</i> | 43   | 1098 | 1140 |
| LinJ33_V3.3240 | <i>L. infantum</i> | 54   | 1342 | 1395 |
| LinJ33_V3.3240 | <i>L. infantum</i> | 340  | 1685 | 2024 |
| LinJ33_V3.3240 | <i>L. infantum</i> | 115  | 2026 | 2140 |
| LinJ33_V3.3250 | <i>L. infantum</i> | 79   | 60   | 138  |
| LinJ33_V3.3250 | <i>L. infantum</i> | 40   | 1201 | 1240 |
| LinJ33_V3.3260 | <i>L. infantum</i> | 57   | 235  | 291  |
| LinJ33_V3.3270 | <i>L. infantum</i> | 57   | 741  | 797  |
| LinJ33_V3.3300 | <i>L. infantum</i> | 56   | 1    | 56   |
| LinJ33_V3.3310 | <i>L. infantum</i> | 54   | 1    | 54   |
| LinJ33_V3.3310 | <i>L. infantum</i> | 141  | 271  | 411  |
| LinJ33_V3.3320 | <i>L. infantum</i> | 46   | 124  | 169  |
| LinJ33_V3.3320 | <i>L. infantum</i> | 159  | 178  | 336  |
| LinJ33_V3.3320 | <i>L. infantum</i> | 155  | 338  | 492  |
| LinJ33_V3.3330 | <i>L. infantum</i> | 170  | 357  | 526  |
| LinJ33_V3.3330 | <i>L. infantum</i> | 60   | 553  | 612  |

|                |                    |     |      |      |
|----------------|--------------------|-----|------|------|
| LinJ33_V3.3360 | <i>L. infantum</i> | 94  | 791  | 884  |
| LinJ33_V3.3380 | <i>L. infantum</i> | 49  | 30   | 78   |
| LinJ33_V3.3390 | <i>L. infantum</i> | 136 | 1    | 136  |
| LinJ33_V3.3400 | <i>L. infantum</i> | 451 | 7    | 457  |
| LinJ34_V3.0030 | <i>L. infantum</i> | 43  | 298  | 340  |
| LinJ34_V3.0040 | <i>L. infantum</i> | 56  | 396  | 451  |
| LinJ34_V3.0040 | <i>L. infantum</i> | 53  | 511  | 563  |
| LinJ34_V3.0040 | <i>L. infantum</i> | 53  | 511  | 563  |
| LinJ34_V3.0050 | <i>L. infantum</i> | 40  | 47   | 86   |
| LinJ34_V3.0060 | <i>L. infantum</i> | 44  | 237  | 280  |
| LinJ34_V3.0060 | <i>L. infantum</i> | 61  | 511  | 571  |
| LinJ34_V3.0060 | <i>L. infantum</i> | 184 | 883  | 1066 |
| LinJ34_V3.0100 | <i>L. infantum</i> | 61  | 39   | 99   |
| LinJ34_V3.0110 | <i>L. infantum</i> | 42  | 271  | 312  |
| LinJ34_V3.0110 | <i>L. infantum</i> | 115 | 421  | 535  |
| LinJ34_V3.0110 | <i>L. infantum</i> | 115 | 421  | 535  |
| LinJ34_V3.0180 | <i>L. infantum</i> | 328 | 1    | 328  |
| LinJ34_V3.0190 | <i>L. infantum</i> | 154 | 1    | 154  |
| LinJ34_V3.0190 | <i>L. infantum</i> | 449 | 174  | 622  |
| LinJ34_V3.0200 | <i>L. infantum</i> | 96  | 263  | 358  |
| LinJ34_V3.0200 | <i>L. infantum</i> | 42  | 422  | 463  |
| LinJ34_V3.0200 | <i>L. infantum</i> | 45  | 518  | 562  |
| LinJ34_V3.0220 | <i>L. infantum</i> | 51  | 353  | 403  |
| LinJ34_V3.0230 | <i>L. infantum</i> | 141 | 69   | 209  |
| LinJ34_V3.0240 | <i>L. infantum</i> | 79  | 194  | 272  |
| LinJ34_V3.0250 | <i>L. infantum</i> | 242 | 203  | 444  |
| LinJ34_V3.0250 | <i>L. infantum</i> | 113 | 547  | 659  |
| LinJ34_V3.0250 | <i>L. infantum</i> | 113 | 547  | 659  |
| LinJ34_V3.0260 | <i>L. infantum</i> | 447 | 76   | 522  |
| LinJ34_V3.0260 | <i>L. infantum</i> | 312 | 539  | 850  |
| LinJ34_V3.0260 | <i>L. infantum</i> | 44  | 882  | 925  |
| LinJ34_V3.0260 | <i>L. infantum</i> | 307 | 1032 | 1338 |
| LinJ34_V3.0270 | <i>L. infantum</i> | 285 | 1    | 285  |
| LinJ34_V3.0270 | <i>L. infantum</i> | 86  | 298  | 383  |
| LinJ34_V3.0280 | <i>L. infantum</i> | 64  | 10   | 73   |
| LinJ34_V3.0290 | <i>L. infantum</i> | 60  | 301  | 360  |
| LinJ34_V3.0300 | <i>L. infantum</i> | 196 | 1    | 196  |
| LinJ34_V3.0300 | <i>L. infantum</i> | 56  | 228  | 283  |
| LinJ34_V3.0300 | <i>L. infantum</i> | 65  | 319  | 383  |
| LinJ34_V3.0300 | <i>L. infantum</i> | 40  | 1140 | 1179 |
| LinJ34_V3.0300 | <i>L. infantum</i> | 40  | 1345 | 1384 |
| LinJ34_V3.0310 | <i>L. infantum</i> | 59  | 63   | 121  |
| LinJ34_V3.0320 | <i>L. infantum</i> | 81  | 1    | 81   |
| LinJ34_V3.0320 | <i>L. infantum</i> | 156 | 606  | 761  |
| LinJ34_V3.0330 | <i>L. infantum</i> | 148 | 249  | 396  |
| LinJ34_V3.0340 | <i>L. infantum</i> | 47  | 312  | 358  |
| LinJ34_V3.0350 | <i>L. infantum</i> | 54  | 205  | 258  |

|                |                    |     |      |      |
|----------------|--------------------|-----|------|------|
| LinJ34_V3.0350 | <i>L. infantum</i> | 48  | 407  | 454  |
| LinJ34_V3.0360 | <i>L. infantum</i> | 47  | 162  | 208  |
| LinJ34_V3.0360 | <i>L. infantum</i> | 106 | 215  | 320  |
| LinJ34_V3.0360 | <i>L. infantum</i> | 62  | 391  | 452  |
| LinJ34_V3.0360 | <i>L. infantum</i> | 79  | 585  | 663  |
| LinJ34_V3.0370 | <i>L. infantum</i> | 73  | 137  | 209  |
| LinJ34_V3.0380 | <i>L. infantum</i> | 42  | 748  | 789  |
| LinJ34_V3.0380 | <i>L. infantum</i> | 111 | 1003 | 1113 |
| LinJ34_V3.0380 | <i>L. infantum</i> | 65  | 1488 | 1552 |
| LinJ34_V3.0390 | <i>L. infantum</i> | 100 | 1    | 100  |
| LinJ34_V3.0390 | <i>L. infantum</i> | 49  | 133  | 181  |
| LinJ34_V3.0390 | <i>L. infantum</i> | 40  | 561  | 600  |
| LinJ34_V3.0390 | <i>L. infantum</i> | 48  | 777  | 824  |
| LinJ34_V3.0400 | <i>L. infantum</i> | 67  | 163  | 229  |
| LinJ34_V3.0410 | <i>L. infantum</i> | 52  | 313  | 364  |
| LinJ34_V3.0430 | <i>L. infantum</i> | 103 | 277  | 379  |
| LinJ34_V3.0440 | <i>L. infantum</i> | 74  | 44   | 117  |
| LinJ34_V3.0450 | <i>L. infantum</i> | 140 | 1    | 140  |
| LinJ34_V3.0460 | <i>L. infantum</i> | 40  | 1    | 40   |
| LinJ34_V3.0470 | <i>L. infantum</i> | 287 | 1    | 287  |
| LinJ34_V3.0470 | <i>L. infantum</i> | 206 | 299  | 504  |
| LinJ34_V3.0470 | <i>L. infantum</i> | 427 | 510  | 936  |
| LinJ34_V3.0480 | <i>L. infantum</i> | 41  | 55   | 95   |
| LinJ34_V3.0480 | <i>L. infantum</i> | 50  | 1088 | 1137 |
| LinJ34_V3.0480 | <i>L. infantum</i> | 86  | 1801 | 1886 |
| LinJ34_V3.0480 | <i>L. infantum</i> | 69  | 1912 | 1980 |
| LinJ34_V3.0480 | <i>L. infantum</i> | 169 | 2236 | 2404 |
| LinJ34_V3.0490 | <i>L. infantum</i> | 332 | 386  | 717  |
| LinJ34_V3.0500 | <i>L. infantum</i> | 54  | 21   | 74   |
| LinJ34_V3.0500 | <i>L. infantum</i> | 145 | 453  | 597  |
| LinJ34_V3.0500 | <i>L. infantum</i> | 134 | 626  | 759  |
| LinJ34_V3.0500 | <i>L. infantum</i> | 66  | 808  | 873  |
| LinJ34_V3.0500 | <i>L. infantum</i> | 98  | 1254 | 1351 |
| LinJ34_V3.0500 | <i>L. infantum</i> | 172 | 2385 | 2556 |
| LinJ34_V3.0520 | <i>L. infantum</i> | 217 | 41   | 257  |
| LinJ34_V3.0530 | <i>L. infantum</i> | 47  | 1    | 47   |
| LinJ34_V3.0530 | <i>L. infantum</i> | 84  | 487  | 570  |
| LinJ34_V3.0540 | <i>L. infantum</i> | 523 | 1    | 523  |
| LinJ34_V3.0540 | <i>L. infantum</i> | 440 | 592  | 1031 |
| LinJ34_V3.0540 | <i>L. infantum</i> | 61  | 1071 | 1131 |
| LinJ34_V3.0540 | <i>L. infantum</i> | 229 | 1133 | 1361 |
| LinJ34_V3.0550 | <i>L. infantum</i> | 215 | 1    | 215  |
| LinJ34_V3.0550 | <i>L. infantum</i> | 61  | 244  | 304  |
| LinJ34_V3.0550 | <i>L. infantum</i> | 164 | 328  | 491  |
| LinJ34_V3.0560 | <i>L. infantum</i> | 48  | 67   | 114  |
| LinJ34_V3.0560 | <i>L. infantum</i> | 50  | 340  | 389  |
| LinJ34_V3.0570 | <i>L. infantum</i> | 47  | 1    | 47   |

|                |                    |      |      |      |
|----------------|--------------------|------|------|------|
| LinJ34_V3.0570 | <i>L. infantum</i> | 95   | 58   | 152  |
| LinJ34_V3.0570 | <i>L. infantum</i> | 94   | 176  | 269  |
| LinJ34_V3.0580 | <i>L. infantum</i> | 49   | 1    | 49   |
| LinJ34_V3.0580 | <i>L. infantum</i> | 132  | 148  | 279  |
| LinJ34_V3.0580 | <i>L. infantum</i> | 42   | 557  | 598  |
| LinJ34_V3.0580 | <i>L. infantum</i> | 55   | 880  | 934  |
| LinJ34_V3.0580 | <i>L. infantum</i> | 121  | 1125 | 1245 |
| LinJ34_V3.0580 | <i>L. infantum</i> | 54   | 1639 | 1692 |
| LinJ34_V3.0580 | <i>L. infantum</i> | 136  | 1745 | 1880 |
| LinJ34_V3.0590 | <i>L. infantum</i> | 42   | 1    | 42   |
| LinJ34_V3.0590 | <i>L. infantum</i> | 82   | 309  | 390  |
| LinJ34_V3.0590 | <i>L. infantum</i> | 42   | 471  | 512  |
| LinJ34_V3.0590 | <i>L. infantum</i> | 46   | 789  | 834  |
| LinJ34_V3.0600 | <i>L. infantum</i> | 122  | 1    | 122  |
| LinJ34_V3.0610 | <i>L. infantum</i> | 52   | 892  | 943  |
| LinJ34_V3.0610 | <i>L. infantum</i> | 43   | 972  | 1014 |
| LinJ34_V3.0610 | <i>L. infantum</i> | 41   | 1042 | 1082 |
| LinJ34_V3.0620 | <i>L. infantum</i> | 115  | 1    | 115  |
| LinJ34_V3.0620 | <i>L. infantum</i> | 253  | 283  | 535  |
| LinJ34_V3.0620 | <i>L. infantum</i> | 303  | 543  | 845  |
| LinJ34_V3.0640 | <i>L. infantum</i> | 915  | 1    | 915  |
| LinJ34_V3.0640 | <i>L. infantum</i> | 62   | 1016 | 1077 |
| LinJ34_V3.0640 | <i>L. infantum</i> | 192  | 1079 | 1270 |
| LinJ34_V3.0640 | <i>L. infantum</i> | 40   | 1313 | 1352 |
| LinJ34_V3.0640 | <i>L. infantum</i> | 1028 | 1366 | 2393 |
| LinJ34_V3.0650 | <i>L. infantum</i> | 169  | 49   | 217  |
| LinJ34_V3.0650 | <i>L. infantum</i> | 70   | 256  | 325  |
| LinJ34_V3.0650 | <i>L. infantum</i> | 95   | 443  | 537  |
| LinJ34_V3.0650 | <i>L. infantum</i> | 44   | 571  | 614  |
| LinJ34_V3.0650 | <i>L. infantum</i> | 103  | 638  | 740  |
| LinJ34_V3.0660 | <i>L. infantum</i> | 87   | 110  | 196  |
| LinJ34_V3.0660 | <i>L. infantum</i> | 104  | 229  | 332  |
| LinJ34_V3.0680 | <i>L. infantum</i> | 205  | 1    | 205  |
| LinJ34_V3.0680 | <i>L. infantum</i> | 55   | 336  | 390  |
| LinJ34_V3.0680 | <i>L. infantum</i> | 358  | 477  | 834  |
| LinJ34_V3.0680 | <i>L. infantum</i> | 41   | 858  | 898  |
| LinJ34_V3.0690 | <i>L. infantum</i> | 72   | 351  | 422  |
| LinJ34_V3.0690 | <i>L. infantum</i> | 67   | 647  | 713  |
| LinJ34_V3.0690 | <i>L. infantum</i> | 61   | 777  | 837  |
| LinJ34_V3.0690 | <i>L. infantum</i> | 49   | 978  | 1026 |
| LinJ34_V3.0690 | <i>L. infantum</i> | 89   | 1259 | 1347 |
| LinJ34_V3.0690 | <i>L. infantum</i> | 45   | 1717 | 1761 |
| LinJ34_V3.0690 | <i>L. infantum</i> | 66   | 1907 | 1972 |
| LinJ34_V3.0700 | <i>L. infantum</i> | 77   | 385  | 461  |
| LinJ34_V3.0700 | <i>L. infantum</i> | 105  | 480  | 584  |
| LinJ34_V3.0700 | <i>L. infantum</i> | 85   | 599  | 683  |
| LinJ34_V3.0700 | <i>L. infantum</i> | 105  | 702  | 806  |

|                |                    |     |      |      |
|----------------|--------------------|-----|------|------|
| LinJ34_V3.0700 | <i>L. infantum</i> | 85  | 821  | 905  |
| LinJ34_V3.0700 | <i>L. infantum</i> | 102 | 924  | 1025 |
| LinJ34_V3.0700 | <i>L. infantum</i> | 159 | 1048 | 1206 |
| LinJ34_V3.0720 | <i>L. infantum</i> | 212 | 579  | 790  |
| LinJ34_V3.0720 | <i>L. infantum</i> | 721 | 809  | 1529 |
| LinJ34_V3.0730 | <i>L. infantum</i> | 120 | 163  | 282  |
| LinJ34_V3.0750 | <i>L. infantum</i> | 51  | 240  | 290  |
| LinJ34_V3.0750 | <i>L. infantum</i> | 51  | 718  | 768  |
| LinJ34_V3.0750 | <i>L. infantum</i> | 51  | 718  | 768  |
| LinJ34_V3.0760 | <i>L. infantum</i> | 78  | 333  | 410  |
| LinJ34_V3.0780 | <i>L. infantum</i> | 43  | 342  | 384  |
| LinJ34_V3.0800 | <i>L. infantum</i> | 51  | 150  | 200  |
| LinJ34_V3.0810 | <i>L. infantum</i> | 145 | 1    | 145  |
| LinJ34_V3.0870 | <i>L. infantum</i> | 87  | 70   | 156  |
| LinJ34_V3.0890 | <i>L. infantum</i> | 87  | 70   | 156  |
| LinJ34_V3.0910 | <i>L. infantum</i> | 46  | 177  | 222  |
| LinJ34_V3.0920 | <i>L. infantum</i> | 72  | 15   | 86   |
| LinJ34_V3.0920 | <i>L. infantum</i> | 78  | 180  | 257  |
| LinJ34_V3.0920 | <i>L. infantum</i> | 66  | 299  | 364  |
| LinJ34_V3.0920 | <i>L. infantum</i> | 140 | 421  | 560  |
| LinJ34_V3.0930 | <i>L. infantum</i> | 41  | 1    | 41   |
| LinJ34_V3.0930 | <i>L. infantum</i> | 71  | 457  | 527  |
| LinJ34_V3.0930 | <i>L. infantum</i> | 71  | 457  | 527  |
| LinJ34_V3.0940 | <i>L. infantum</i> | 67  | 1    | 67   |
| LinJ34_V3.0950 | <i>L. infantum</i> | 99  | 164  | 262  |
| LinJ34_V3.0970 | <i>L. infantum</i> | 314 | 84   | 397  |
| LinJ34_V3.0970 | <i>L. infantum</i> | 58  | 592  | 649  |
| LinJ34_V3.0990 | <i>L. infantum</i> | 307 | 1    | 307  |
| LinJ34_V3.0990 | <i>L. infantum</i> | 181 | 312  | 492  |
| LinJ34_V3.0990 | <i>L. infantum</i> | 40  | 570  | 609  |
| LinJ34_V3.0990 | <i>L. infantum</i> | 62  | 848  | 909  |
| LinJ34_V3.0990 | <i>L. infantum</i> | 62  | 941  | 1002 |
| LinJ34_V3.1000 | <i>L. infantum</i> | 44  | 425  | 468  |
| LinJ34_V3.1060 | <i>L. infantum</i> | 52  | 1    | 52   |
| LinJ34_V3.1070 | <i>L. infantum</i> | 72  | 234  | 305  |
| LinJ34_V3.1070 | <i>L. infantum</i> | 46  | 1052 | 1097 |
| LinJ34_V3.1070 | <i>L. infantum</i> | 154 | 1219 | 1372 |
| LinJ34_V3.1080 | <i>L. infantum</i> | 139 | 114  | 252  |
| LinJ34_V3.1080 | <i>L. infantum</i> | 57  | 272  | 328  |
| LinJ34_V3.1080 | <i>L. infantum</i> | 157 | 366  | 522  |
| LinJ34_V3.1090 | <i>L. infantum</i> | 54  | 1    | 54   |
| LinJ34_V3.1100 | <i>L. infantum</i> | 93  | 20   | 112  |
| LinJ34_V3.1120 | <i>L. infantum</i> | 41  | 1    | 41   |
| LinJ34_V3.1120 | <i>L. infantum</i> | 58  | 178  | 235  |
| LinJ34_V3.1120 | <i>L. infantum</i> | 58  | 178  | 235  |
| LinJ34_V3.1140 | <i>L. infantum</i> | 81  | 274  | 354  |
| LinJ34_V3.1160 | <i>L. infantum</i> | 205 | 29   | 233  |



|                |                    |      |      |      |
|----------------|--------------------|------|------|------|
| LinJ34_V3.1170 | <i>L. infantum</i> | 51   | 51   | 101  |
| LinJ34_V3.1170 | <i>L. infantum</i> | 46   | 341  | 386  |
| LinJ34_V3.1170 | <i>L. infantum</i> | 68   | 583  | 650  |
| LinJ34_V3.1170 | <i>L. infantum</i> | 73   | 933  | 1005 |
| LinJ34_V3.1180 | <i>L. infantum</i> | 48   | 1    | 48   |
| LinJ34_V3.1180 | <i>L. infantum</i> | 44   | 75   | 118  |
| LinJ34_V3.1180 | <i>L. infantum</i> | 114  | 207  | 320  |
| LinJ34_V3.1190 | <i>L. infantum</i> | 268  | 268  | 535  |
| LinJ34_V3.1200 | <i>L. infantum</i> | 109  | 118  | 226  |
| LinJ34_V3.1210 | <i>L. infantum</i> | 1245 | 1    | 1245 |
| LinJ34_V3.1210 | <i>L. infantum</i> | 215  | 1289 | 1503 |
| LinJ34_V3.1210 | <i>L. infantum</i> | 68   | 1564 | 1631 |
| LinJ34_V3.1210 | <i>L. infantum</i> | 898  | 1639 | 2536 |
| LinJ34_V3.1220 | <i>L. infantum</i> | 53   | 338  | 390  |
| LinJ34_V3.1230 | <i>L. infantum</i> | 67   | 1    | 67   |
| LinJ34_V3.1230 | <i>L. infantum</i> | 124  | 118  | 241  |
| LinJ34_V3.1230 | <i>L. infantum</i> | 124  | 118  | 241  |
| LinJ34_V3.1240 | <i>L. infantum</i> | 82   | 100  | 181  |
| LinJ34_V3.1250 | <i>L. infantum</i> | 51   | 348  | 398  |
| LinJ34_V3.1250 | <i>L. infantum</i> | 43   | 408  | 450  |
| LinJ34_V3.1250 | <i>L. infantum</i> | 43   | 408  | 450  |
| LinJ34_V3.1260 | <i>L. infantum</i> | 637  | 29   | 665  |
| LinJ34_V3.1270 | <i>L. infantum</i> | 100  | 177  | 276  |
| LinJ34_V3.1280 | <i>L. infantum</i> | 52   | 106  | 157  |
| LinJ34_V3.1280 | <i>L. infantum</i> | 106  | 194  | 299  |
| LinJ34_V3.1290 | <i>L. infantum</i> | 269  | 61   | 329  |
| LinJ34_V3.1290 | <i>L. infantum</i> | 93   | 379  | 471  |
| LinJ34_V3.1290 | <i>L. infantum</i> | 65   | 534  | 598  |
| LinJ34_V3.1290 | <i>L. infantum</i> | 63   | 695  | 757  |
| LinJ34_V3.1290 | <i>L. infantum</i> | 40   | 1077 | 1116 |
| LinJ34_V3.1290 | <i>L. infantum</i> | 51   | 1155 | 1205 |
| LinJ34_V3.1290 | <i>L. infantum</i> | 65   | 1434 | 1498 |
| LinJ34_V3.1290 | <i>L. infantum</i> | 80   | 1537 | 1616 |
| LinJ34_V3.1290 | <i>L. infantum</i> | 57   | 1768 | 1824 |
| LinJ34_V3.1310 | <i>L. infantum</i> | 42   | 91   | 132  |
| LinJ34_V3.1310 | <i>L. infantum</i> | 134  | 149  | 282  |
| LinJ34_V3.1310 | <i>L. infantum</i> | 60   | 416  | 475  |
| LinJ34_V3.1320 | <i>L. infantum</i> | 61   | 60   | 120  |
| LinJ34_V3.1320 | <i>L. infantum</i> | 46   | 194  | 239  |
| LinJ34_V3.1320 | <i>L. infantum</i> | 155  | 551  | 705  |
| LinJ34_V3.1330 | <i>L. infantum</i> | 45   | 37   | 81   |
| LinJ34_V3.1330 | <i>L. infantum</i> | 40   | 119  | 158  |
| LinJ34_V3.1330 | <i>L. infantum</i> | 42   | 426  | 467  |
| LinJ34_V3.1330 | <i>L. infantum</i> | 41   | 1093 | 1133 |
| LinJ34_V3.1330 | <i>L. infantum</i> | 67   | 1147 | 1213 |
| LinJ34_V3.1330 | <i>L. infantum</i> | 94   | 1281 | 1374 |
| LinJ34_V3.1330 | <i>L. infantum</i> | 134  | 1408 | 1541 |

|                |                    |     |      |      |
|----------------|--------------------|-----|------|------|
| LinJ34_V3.1340 | <i>L. infantum</i> | 40  | 180  | 219  |
| LinJ34_V3.1340 | <i>L. infantum</i> | 44  | 505  | 548  |
| LinJ34_V3.1340 | <i>L. infantum</i> | 44  | 505  | 548  |
| LinJ34_V3.1370 | <i>L. infantum</i> | 56  | 1    | 56   |
| LinJ34_V3.1370 | <i>L. infantum</i> | 83  | 76   | 158  |
| LinJ34_V3.1370 | <i>L. infantum</i> | 79  | 166  | 244  |
| LinJ34_V3.1370 | <i>L. infantum</i> | 163 | 247  | 409  |
| LinJ34_V3.1370 | <i>L. infantum</i> | 54  | 901  | 954  |
| LinJ34_V3.1380 | <i>L. infantum</i> | 107 | 72   | 178  |
| LinJ34_V3.1380 | <i>L. infantum</i> | 45  | 182  | 226  |
| LinJ34_V3.1380 | <i>L. infantum</i> | 64  | 529  | 592  |
| LinJ34_V3.1380 | <i>L. infantum</i> | 51  | 670  | 720  |
| LinJ34_V3.1380 | <i>L. infantum</i> | 170 | 724  | 893  |
| LinJ34_V3.1380 | <i>L. infantum</i> | 60  | 921  | 980  |
| LinJ34_V3.1390 | <i>L. infantum</i> | 81  | 224  | 304  |
| LinJ34_V3.1400 | <i>L. infantum</i> | 40  | 288  | 327  |
| LinJ34_V3.1400 | <i>L. infantum</i> | 46  | 403  | 448  |
| LinJ34_V3.1400 | <i>L. infantum</i> | 149 | 513  | 661  |
| LinJ34_V3.1400 | <i>L. infantum</i> | 40  | 680  | 719  |
| LinJ34_V3.1410 | <i>L. infantum</i> | 68  | 48   | 115  |
| LinJ34_V3.1410 | <i>L. infantum</i> | 162 | 198  | 359  |
| LinJ34_V3.1420 | <i>L. infantum</i> | 124 | 1    | 124  |
| LinJ34_V3.1420 | <i>L. infantum</i> | 162 | 250  | 411  |
| LinJ34_V3.1420 | <i>L. infantum</i> | 73  | 736  | 808  |
| LinJ34_V3.1420 | <i>L. infantum</i> | 119 | 836  | 954  |
| LinJ34_V3.1430 | <i>L. infantum</i> | 251 | 54   | 304  |
| LinJ34_V3.1430 | <i>L. infantum</i> | 48  | 337  | 384  |
| LinJ34_V3.1430 | <i>L. infantum</i> | 81  | 421  | 501  |
| LinJ34_V3.1430 | <i>L. infantum</i> | 73  | 561  | 633  |
| LinJ34_V3.1430 | <i>L. infantum</i> | 90  | 683  | 772  |
| LinJ34_V3.1450 | <i>L. infantum</i> | 56  | 69   | 124  |
| LinJ34_V3.1450 | <i>L. infantum</i> | 40  | 348  | 387  |
| LinJ34_V3.1450 | <i>L. infantum</i> | 189 | 424  | 612  |
| LinJ34_V3.1450 | <i>L. infantum</i> | 295 | 1007 | 1301 |
| LinJ34_V3.1460 | <i>L. infantum</i> | 66  | 1    | 66   |
| LinJ34_V3.1460 | <i>L. infantum</i> | 62  | 89   | 150  |
| LinJ34_V3.1460 | <i>L. infantum</i> | 154 | 209  | 362  |
| LinJ34_V3.1460 | <i>L. infantum</i> | 43  | 384  | 426  |
| LinJ34_V3.1470 | <i>L. infantum</i> | 115 | 37   | 151  |
| LinJ34_V3.1470 | <i>L. infantum</i> | 50  | 314  | 363  |
| LinJ34_V3.1470 | <i>L. infantum</i> | 40  | 700  | 739  |
| LinJ34_V3.1470 | <i>L. infantum</i> | 41  | 850  | 890  |
| LinJ34_V3.1470 | <i>L. infantum</i> | 59  | 1353 | 1411 |
| LinJ34_V3.1470 | <i>L. infantum</i> | 69  | 1629 | 1697 |
| LinJ34_V3.1470 | <i>L. infantum</i> | 47  | 1707 | 1753 |
| LinJ34_V3.1470 | <i>L. infantum</i> | 48  | 1819 | 1866 |
| LinJ34_V3.1470 | <i>L. infantum</i> | 62  | 2120 | 2181 |

|                |                    |     |      |      |
|----------------|--------------------|-----|------|------|
| LinJ34_V3.1470 | <i>L. infantum</i> | 168 | 2355 | 2522 |
| LinJ34_V3.1480 | <i>L. infantum</i> | 58  | 1    | 58   |
| LinJ34_V3.1480 | <i>L. infantum</i> | 49  | 110  | 158  |
| LinJ34_V3.1480 | <i>L. infantum</i> | 118 | 206  | 323  |
| LinJ34_V3.1500 | <i>L. infantum</i> | 59  | 101  | 159  |
| LinJ34_V3.1500 | <i>L. infantum</i> | 55  | 194  | 248  |
| LinJ34_V3.1500 | <i>L. infantum</i> | 191 | 465  | 655  |
| LinJ34_V3.1500 | <i>L. infantum</i> | 52  | 720  | 771  |
| LinJ34_V3.1500 | <i>L. infantum</i> | 56  | 1456 | 1511 |
| LinJ34_V3.1500 | <i>L. infantum</i> | 76  | 1972 | 2047 |
| LinJ34_V3.1500 | <i>L. infantum</i> | 71  | 2159 | 2229 |
| LinJ34_V3.1500 | <i>L. infantum</i> | 64  | 2283 | 2346 |
| LinJ34_V3.1500 | <i>L. infantum</i> | 42  | 2588 | 2629 |
| LinJ34_V3.1500 | <i>L. infantum</i> | 45  | 2853 | 2897 |
| LinJ34_V3.1500 | <i>L. infantum</i> | 45  | 4257 | 4301 |
| LinJ34_V3.1500 | <i>L. infantum</i> | 84  | 4534 | 4617 |
| LinJ34_V3.1500 | <i>L. infantum</i> | 62  | 4679 | 4740 |
| LinJ34_V3.1520 | <i>L. infantum</i> | 79  | 140  | 218  |
| LinJ34_V3.1520 | <i>L. infantum</i> | 47  | 255  | 301  |
| LinJ34_V3.1540 | <i>L. infantum</i> | 176 | 209  | 384  |
| LinJ34_V3.1540 | <i>L. infantum</i> | 63  | 387  | 449  |
| LinJ34_V3.1540 | <i>L. infantum</i> | 125 | 611  | 735  |
| LinJ34_V3.1550 | <i>L. infantum</i> | 88  | 49   | 136  |
| LinJ34_V3.1550 | <i>L. infantum</i> | 56  | 188  | 243  |
| LinJ34_V3.1550 | <i>L. infantum</i> | 127 | 318  | 444  |
| LinJ34_V3.1550 | <i>L. infantum</i> | 56  | 467  | 522  |
| LinJ34_V3.1560 | <i>L. infantum</i> | 61  | 1    | 61   |
| LinJ34_V3.1560 | <i>L. infantum</i> | 46  | 93   | 138  |
| LinJ34_V3.1560 | <i>L. infantum</i> | 44  | 477  | 520  |
| LinJ34_V3.1560 | <i>L. infantum</i> | 46  | 660  | 705  |
| LinJ34_V3.1570 | <i>L. infantum</i> | 59  | 1    | 59   |
| LinJ34_V3.1570 | <i>L. infantum</i> | 42  | 226  | 267  |
| LinJ34_V3.1570 | <i>L. infantum</i> | 49  | 322  | 370  |
| LinJ34_V3.1580 | <i>L. infantum</i> | 326 | 20   | 345  |
| LinJ34_V3.1580 | <i>L. infantum</i> | 107 | 393  | 499  |
| LinJ34_V3.1580 | <i>L. infantum</i> | 490 | 512  | 1001 |
| LinJ34_V3.1600 | <i>L. infantum</i> | 54  | 1    | 54   |
| LinJ34_V3.1600 | <i>L. infantum</i> | 51  | 218  | 268  |
| LinJ34_V3.1600 | <i>L. infantum</i> | 61  | 632  | 692  |
| LinJ34_V3.1610 | <i>L. infantum</i> | 429 | 59   | 487  |
| LinJ34_V3.1620 | <i>L. infantum</i> | 153 | 1    | 153  |
| LinJ34_V3.1630 | <i>L. infantum</i> | 142 | 1    | 142  |
| LinJ34_V3.1640 | <i>L. infantum</i> | 61  | 1    | 61   |
| LinJ34_V3.1640 | <i>L. infantum</i> | 247 | 600  | 846  |
| LinJ34_V3.1640 | <i>L. infantum</i> | 142 | 927  | 1068 |
| LinJ34_V3.1670 | <i>L. infantum</i> | 49  | 1    | 49   |
| LinJ34_V3.1740 | <i>L. infantum</i> | 85  | 241  | 325  |

|                |                    |     |      |      |
|----------------|--------------------|-----|------|------|
| LinJ34_V3.1740 | <i>L. infantum</i> | 221 | 434  | 654  |
| LinJ34_V3.1760 | <i>L. infantum</i> | 56  | 1    | 56   |
| LinJ34_V3.1770 | <i>L. infantum</i> | 48  | 51   | 98   |
| LinJ34_V3.1770 | <i>L. infantum</i> | 155 | 475  | 629  |
| LinJ34_V3.1780 | <i>L. infantum</i> | 61  | 1    | 61   |
| LinJ34_V3.1780 | <i>L. infantum</i> | 193 | 259  | 451  |
| LinJ34_V3.1780 | <i>L. infantum</i> | 163 | 485  | 647  |
| LinJ34_V3.1780 | <i>L. infantum</i> | 46  | 683  | 728  |
| LinJ34_V3.1780 | <i>L. infantum</i> | 47  | 934  | 980  |
| LinJ34_V3.1780 | <i>L. infantum</i> | 96  | 1123 | 1218 |
| LinJ34_V3.1790 | <i>L. infantum</i> | 42  | 1    | 42   |
| LinJ34_V3.1790 | <i>L. infantum</i> | 185 | 49   | 233  |
| LinJ34_V3.1790 | <i>L. infantum</i> | 185 | 49   | 233  |
| LinJ34_V3.1800 | <i>L. infantum</i> | 217 | 433  | 649  |
| LinJ34_V3.1800 | <i>L. infantum</i> | 110 | 694  | 803  |
| LinJ34_V3.1810 | <i>L. infantum</i> | 53  | 131  | 183  |
| LinJ34_V3.1810 | <i>L. infantum</i> | 83  | 185  | 267  |
| LinJ34_V3.1810 | <i>L. infantum</i> | 83  | 185  | 267  |
| LinJ34_V3.1830 | <i>L. infantum</i> | 87  | 1    | 87   |
| LinJ34_V3.1830 | <i>L. infantum</i> | 125 | 211  | 335  |
| LinJ34_V3.1830 | <i>L. infantum</i> | 84  | 397  | 480  |
| LinJ34_V3.1830 | <i>L. infantum</i> | 53  | 730  | 782  |
| LinJ34_V3.1830 | <i>L. infantum</i> | 59  | 807  | 865  |
| LinJ34_V3.1830 | <i>L. infantum</i> | 77  | 1089 | 1165 |
| LinJ34_V3.1830 | <i>L. infantum</i> | 45  | 1242 | 1286 |
| LinJ34_V3.1830 | <i>L. infantum</i> | 43  | 1620 | 1662 |
| LinJ34_V3.1830 | <i>L. infantum</i> | 61  | 1687 | 1747 |
| LinJ34_V3.1830 | <i>L. infantum</i> | 57  | 1753 | 1809 |
| LinJ34_V3.1830 | <i>L. infantum</i> | 119 | 1827 | 1945 |
| LinJ34_V3.1840 | <i>L. infantum</i> | 51  | 1    | 51   |
| LinJ34_V3.1840 | <i>L. infantum</i> | 41  | 345  | 385  |
| LinJ34_V3.1840 | <i>L. infantum</i> | 41  | 345  | 385  |
| LinJ34_V3.1850 | <i>L. infantum</i> | 42  | 36   | 77   |
| LinJ34_V3.1850 | <i>L. infantum</i> | 53  | 92   | 144  |
| LinJ34_V3.1850 | <i>L. infantum</i> | 85  | 328  | 412  |
| LinJ34_V3.1850 | <i>L. infantum</i> | 81  | 483  | 563  |
| LinJ34_V3.1850 | <i>L. infantum</i> | 147 | 569  | 715  |
| LinJ34_V3.1860 | <i>L. infantum</i> | 203 | 323  | 525  |
| LinJ34_V3.1870 | <i>L. infantum</i> | 46  | 261  | 306  |
| LinJ34_V3.1910 | <i>L. infantum</i> | 40  | 223  | 262  |
| LinJ34_V3.1910 | <i>L. infantum</i> | 74  | 301  | 374  |
| LinJ34_V3.1910 | <i>L. infantum</i> | 44  | 400  | 443  |
| LinJ34_V3.1910 | <i>L. infantum</i> | 240 | 666  | 905  |
| LinJ34_V3.1910 | <i>L. infantum</i> | 45  | 1110 | 1154 |
| LinJ34_V3.1910 | <i>L. infantum</i> | 204 | 1206 | 1409 |
| LinJ34_V3.1920 | <i>L. infantum</i> | 126 | 47   | 172  |
| LinJ34_V3.1920 | <i>L. infantum</i> | 40  | 225  | 264  |

|                |                    |     |      |      |
|----------------|--------------------|-----|------|------|
| LinJ34_V3.1920 | <i>L. infantum</i> | 43  | 419  | 461  |
| LinJ34_V3.1930 | <i>L. infantum</i> | 41  | 63   | 103  |
| LinJ34_V3.1930 | <i>L. infantum</i> | 53  | 270  | 322  |
| LinJ34_V3.1930 | <i>L. infantum</i> | 72  | 460  | 531  |
| LinJ34_V3.1940 | <i>L. infantum</i> | 41  | 635  | 675  |
| LinJ34_V3.1940 | <i>L. infantum</i> | 78  | 780  | 857  |
| LinJ34_V3.1940 | <i>L. infantum</i> | 42  | 1477 | 1518 |
| LinJ34_V3.1950 | <i>L. infantum</i> | 56  | 347  | 402  |
| LinJ34_V3.1950 | <i>L. infantum</i> | 53  | 688  | 740  |
| LinJ34_V3.1950 | <i>L. infantum</i> | 85  | 908  | 992  |
| LinJ34_V3.1960 | <i>L. infantum</i> | 97  | 114  | 210  |
| LinJ34_V3.1960 | <i>L. infantum</i> | 43  | 260  | 302  |
| LinJ34_V3.1960 | <i>L. infantum</i> | 43  | 260  | 302  |
| LinJ34_V3.1970 | <i>L. infantum</i> | 65  | 1    | 65   |
| LinJ34_V3.1970 | <i>L. infantum</i> | 152 | 121  | 272  |
| LinJ34_V3.1970 | <i>L. infantum</i> | 137 | 280  | 416  |
| LinJ34_V3.1970 | <i>L. infantum</i> | 269 | 422  | 690  |
| LinJ34_V3.1970 | <i>L. infantum</i> | 97  | 760  | 856  |
| LinJ34_V3.1970 | <i>L. infantum</i> | 63  | 867  | 929  |
| LinJ34_V3.1980 | <i>L. infantum</i> | 139 | 1    | 139  |
| LinJ34_V3.1980 | <i>L. infantum</i> | 92  | 152  | 243  |
| LinJ34_V3.1980 | <i>L. infantum</i> | 55  | 685  | 739  |
| LinJ34_V3.2000 | <i>L. infantum</i> | 61  | 292  | 352  |
| LinJ34_V3.2000 | <i>L. infantum</i> | 54  | 1129 | 1182 |
| LinJ34_V3.2010 | <i>L. infantum</i> | 41  | 1    | 41   |
| LinJ34_V3.2010 | <i>L. infantum</i> | 93  | 56   | 148  |
| LinJ34_V3.2010 | <i>L. infantum</i> | 59  | 611  | 669  |
| LinJ34_V3.2010 | <i>L. infantum</i> | 50  | 715  | 764  |
| LinJ34_V3.2010 | <i>L. infantum</i> | 55  | 786  | 840  |
| LinJ34_V3.2010 | <i>L. infantum</i> | 83  | 949  | 1031 |
| LinJ34_V3.2010 | <i>L. infantum</i> | 332 | 1047 | 1378 |
| LinJ34_V3.2010 | <i>L. infantum</i> | 146 | 1445 | 1590 |
| LinJ34_V3.2010 | <i>L. infantum</i> | 124 | 1629 | 1752 |
| LinJ34_V3.2010 | <i>L. infantum</i> | 116 | 1828 | 1943 |
| LinJ34_V3.2030 | <i>L. infantum</i> | 63  | 44   | 106  |
| LinJ34_V3.2040 | <i>L. infantum</i> | 149 | 393  | 541  |
| LinJ34_V3.2050 | <i>L. infantum</i> | 57  | 35   | 91   |
| LinJ34_V3.2050 | <i>L. infantum</i> | 41  | 158  | 198  |
| LinJ34_V3.2050 | <i>L. infantum</i> | 105 | 224  | 328  |
| LinJ34_V3.2050 | <i>L. infantum</i> | 80  | 525  | 604  |
| LinJ34_V3.2050 | <i>L. infantum</i> | 94  | 637  | 730  |
| LinJ34_V3.2060 | <i>L. infantum</i> | 43  | 113  | 155  |
| LinJ34_V3.2060 | <i>L. infantum</i> | 52  | 280  | 331  |
| LinJ34_V3.2060 | <i>L. infantum</i> | 52  | 280  | 331  |
| LinJ34_V3.2110 | <i>L. infantum</i> | 199 | 58   | 256  |
| LinJ34_V3.2110 | <i>L. infantum</i> | 45  | 410  | 454  |
| LinJ34_V3.2110 | <i>L. infantum</i> | 45  | 410  | 454  |

|                |                    |     |      |      |
|----------------|--------------------|-----|------|------|
| LinJ34_V3.2120 | <i>L. infantum</i> | 45  | 1    | 45   |
| LinJ34_V3.2130 | <i>L. infantum</i> | 151 | 1    | 151  |
| LinJ34_V3.2130 | <i>L. infantum</i> | 265 | 167  | 431  |
| LinJ34_V3.2140 | <i>L. infantum</i> | 183 | 1    | 183  |
| LinJ34_V3.2140 | <i>L. infantum</i> | 98  | 268  | 365  |
| LinJ34_V3.2150 | <i>L. infantum</i> | 134 | 9    | 142  |
| LinJ34_V3.2150 | <i>L. infantum</i> | 160 | 183  | 342  |
| LinJ34_V3.2160 | <i>L. infantum</i> | 50  | 1    | 50   |
| LinJ34_V3.2160 | <i>L. infantum</i> | 85  | 82   | 166  |
| LinJ34_V3.2160 | <i>L. infantum</i> | 85  | 82   | 166  |
| LinJ34_V3.2200 | <i>L. infantum</i> | 169 | 1    | 169  |
| LinJ34_V3.2200 | <i>L. infantum</i> | 130 | 226  | 355  |
| LinJ34_V3.2200 | <i>L. infantum</i> | 45  | 421  | 465  |
| LinJ34_V3.2210 | <i>L. infantum</i> | 40  | 100  | 139  |
| LinJ34_V3.2220 | <i>L. infantum</i> | 84  | 40   | 123  |
| LinJ34_V3.2220 | <i>L. infantum</i> | 52  | 432  | 483  |
| LinJ34_V3.2220 | <i>L. infantum</i> | 96  | 542  | 637  |
| LinJ34_V3.2220 | <i>L. infantum</i> | 40  | 1122 | 1161 |
| LinJ34_V3.2220 | <i>L. infantum</i> | 57  | 1242 | 1298 |
| LinJ34_V3.2220 | <i>L. infantum</i> | 55  | 1657 | 1711 |
| LinJ34_V3.2230 | <i>L. infantum</i> | 215 | 10   | 224  |
| LinJ34_V3.2230 | <i>L. infantum</i> | 58  | 321  | 378  |
| LinJ34_V3.2230 | <i>L. infantum</i> | 83  | 419  | 501  |
| LinJ34_V3.2260 | <i>L. infantum</i> | 170 | 1    | 170  |
| LinJ34_V3.2260 | <i>L. infantum</i> | 91  | 287  | 377  |
| LinJ34_V3.2270 | <i>L. infantum</i> | 135 | 240  | 374  |
| LinJ34_V3.2280 | <i>L. infantum</i> | 527 | 111  | 637  |
| LinJ34_V3.2280 | <i>L. infantum</i> | 63  | 737  | 799  |
| LinJ34_V3.2280 | <i>L. infantum</i> | 218 | 857  | 1074 |
| LinJ34_V3.2290 | <i>L. infantum</i> | 92  | 1    | 92   |
| LinJ34_V3.2290 | <i>L. infantum</i> | 40  | 192  | 231  |
| LinJ34_V3.2300 | <i>L. infantum</i> | 88  | 228  | 315  |
| LinJ34_V3.2310 | <i>L. infantum</i> | 134 | 1    | 134  |
| LinJ34_V3.2320 | <i>L. infantum</i> | 151 | 1    | 151  |
| LinJ34_V3.2330 | <i>L. infantum</i> | 56  | 204  | 259  |
| LinJ34_V3.2340 | <i>L. infantum</i> | 123 | 17   | 139  |
| LinJ34_V3.2340 | <i>L. infantum</i> | 52  | 199  | 250  |
| LinJ34_V3.2340 | <i>L. infantum</i> | 126 | 359  | 484  |
| LinJ34_V3.2340 | <i>L. infantum</i> | 62  | 514  | 575  |
| LinJ34_V3.2340 | <i>L. infantum</i> | 96  | 897  | 992  |
| LinJ34_V3.2340 | <i>L. infantum</i> | 55  | 1455 | 1509 |
| LinJ34_V3.2340 | <i>L. infantum</i> | 45  | 2162 | 2206 |
| LinJ34_V3.2360 | <i>L. infantum</i> | 66  | 51   | 116  |
| LinJ34_V3.2360 | <i>L. infantum</i> | 90  | 154  | 243  |
| LinJ34_V3.2360 | <i>L. infantum</i> | 155 | 411  | 565  |
| LinJ34_V3.2360 | <i>L. infantum</i> | 134 | 607  | 740  |
| LinJ34_V3.2360 | <i>L. infantum</i> | 264 | 826  | 1089 |

|                |                    |     |      |      |
|----------------|--------------------|-----|------|------|
| LinJ34_V3.2360 | <i>L. infantum</i> | 649 | 1175 | 1823 |
| LinJ34_V3.2370 | <i>L. infantum</i> | 60  | 1    | 60   |
| LinJ34_V3.2370 | <i>L. infantum</i> | 114 | 85   | 198  |
| LinJ34_V3.2370 | <i>L. infantum</i> | 141 | 204  | 344  |
| LinJ34_V3.2370 | <i>L. infantum</i> | 95  | 359  | 453  |
| LinJ34_V3.2370 | <i>L. infantum</i> | 210 | 485  | 694  |
| LinJ34_V3.2380 | <i>L. infantum</i> | 57  | 41   | 97   |
| LinJ34_V3.2380 | <i>L. infantum</i> | 199 | 292  | 490  |
| LinJ34_V3.2380 | <i>L. infantum</i> | 91  | 500  | 590  |
| LinJ34_V3.2390 | <i>L. infantum</i> | 120 | 80   | 199  |
| LinJ34_V3.2390 | <i>L. infantum</i> | 103 | 295  | 397  |
| LinJ34_V3.2390 | <i>L. infantum</i> | 80  | 401  | 480  |
| LinJ34_V3.2390 | <i>L. infantum</i> | 627 | 546  | 1172 |
| LinJ34_V3.2390 | <i>L. infantum</i> | 115 | 1228 | 1342 |
| LinJ34_V3.2400 | <i>L. infantum</i> | 266 | 133  | 398  |
| LinJ34_V3.2400 | <i>L. infantum</i> | 41  | 517  | 557  |
| LinJ34_V3.2410 | <i>L. infantum</i> | 78  | 121  | 198  |
| LinJ34_V3.2420 | <i>L. infantum</i> | 43  | 378  | 420  |
| LinJ34_V3.2440 | <i>L. infantum</i> | 51  | 1    | 51   |
| LinJ34_V3.2440 | <i>L. infantum</i> | 64  | 124  | 187  |
| LinJ34_V3.2440 | <i>L. infantum</i> | 64  | 124  | 187  |
| LinJ34_V3.2450 | <i>L. infantum</i> | 45  | 356  | 400  |
| LinJ34_V3.2460 | <i>L. infantum</i> | 149 | 275  | 423  |
| LinJ34_V3.2460 | <i>L. infantum</i> | 60  | 677  | 736  |
| LinJ34_V3.2470 | <i>L. infantum</i> | 55  | 143  | 197  |
| LinJ34_V3.2470 | <i>L. infantum</i> | 59  | 248  | 306  |
| LinJ34_V3.2470 | <i>L. infantum</i> | 59  | 443  | 501  |
| LinJ34_V3.2470 | <i>L. infantum</i> | 40  | 738  | 777  |
| LinJ34_V3.2470 | <i>L. infantum</i> | 41  | 928  | 968  |
| LinJ34_V3.2470 | <i>L. infantum</i> | 380 | 987  | 1366 |
| LinJ34_V3.2490 | <i>L. infantum</i> | 69  | 288  | 356  |
| LinJ34_V3.2490 | <i>L. infantum</i> | 68  | 646  | 713  |
| LinJ34_V3.2490 | <i>L. infantum</i> | 88  | 753  | 840  |
| LinJ34_V3.2510 | <i>L. infantum</i> | 41  | 79   | 119  |
| LinJ34_V3.2510 | <i>L. infantum</i> | 108 | 278  | 385  |
| LinJ34_V3.2510 | <i>L. infantum</i> | 50  | 454  | 503  |
| LinJ34_V3.2520 | <i>L. infantum</i> | 81  | 53   | 133  |
| LinJ34_V3.2520 | <i>L. infantum</i> | 147 | 142  | 288  |
| LinJ34_V3.2520 | <i>L. infantum</i> | 256 | 317  | 572  |
| LinJ34_V3.2530 | <i>L. infantum</i> | 42  | 1    | 42   |
| LinJ34_V3.2530 | <i>L. infantum</i> | 108 | 83   | 190  |
| LinJ34_V3.2540 | <i>L. infantum</i> | 59  | 1    | 59   |
| LinJ34_V3.2540 | <i>L. infantum</i> | 200 | 66   | 265  |
| LinJ34_V3.2550 | <i>L. infantum</i> | 124 | 257  | 380  |
| LinJ34_V3.2550 | <i>L. infantum</i> | 63  | 611  | 673  |
| LinJ34_V3.2560 | <i>L. infantum</i> | 42  | 366  | 407  |
| LinJ34_V3.2560 | <i>L. infantum</i> | 41  | 599  | 639  |

|                |                    |     |     |     |
|----------------|--------------------|-----|-----|-----|
| LinJ34_V3.2560 | <i>L. infantum</i> | 41  | 599 | 639 |
| LinJ34_V3.2570 | <i>L. infantum</i> | 50  | 1   | 50  |
| LinJ34_V3.2570 | <i>L. infantum</i> | 101 | 84  | 184 |
| LinJ34_V3.2580 | <i>L. infantum</i> | 77  | 111 | 187 |
| LinJ34_V3.2580 | <i>L. infantum</i> | 122 | 306 | 427 |
| LinJ34_V3.2590 | <i>L. infantum</i> | 59  | 61  | 119 |
| LinJ34_V3.2590 | <i>L. infantum</i> | 45  | 257 | 301 |
| LinJ34_V3.2600 | <i>L. infantum</i> | 155 | 1   | 155 |
| LinJ34_V3.2600 | <i>L. infantum</i> | 160 | 184 | 343 |
| LinJ34_V3.2610 | <i>L. infantum</i> | 64  | 113 | 176 |
| LinJ34_V3.2610 | <i>L. infantum</i> | 43  | 276 | 318 |
| LinJ34_V3.2610 | <i>L. infantum</i> | 48  | 370 | 417 |
| LinJ34_V3.2630 | <i>L. infantum</i> | 81  | 88  | 168 |
| LinJ34_V3.2630 | <i>L. infantum</i> | 48  | 355 | 402 |
| LinJ34_V3.2630 | <i>L. infantum</i> | 45  | 558 | 602 |
| LinJ34_V3.2670 | <i>L. infantum</i> | 84  | 158 | 241 |
| LinJ34_V3.2670 | <i>L. infantum</i> | 57  | 283 | 339 |
| LinJ34_V3.2670 | <i>L. infantum</i> | 77  | 767 | 843 |
| LinJ34_V3.2680 | <i>L. infantum</i> | 118 | 28  | 145 |
| LinJ34_V3.2680 | <i>L. infantum</i> | 174 | 182 | 355 |
| LinJ34_V3.2680 | <i>L. infantum</i> | 51  | 597 | 647 |
| LinJ34_V3.2700 | <i>L. infantum</i> | 48  | 360 | 407 |
| LinJ34_V3.2700 | <i>L. infantum</i> | 46  | 513 | 558 |
| LinJ34_V3.2700 | <i>L. infantum</i> | 46  | 513 | 558 |
| LinJ34_V3.2710 | <i>L. infantum</i> | 62  | 127 | 188 |
| LinJ34_V3.2730 | <i>L. infantum</i> | 42  | 1   | 42  |
| LinJ34_V3.2730 | <i>L. infantum</i> | 86  | 334 | 419 |
| LinJ34_V3.2730 | <i>L. infantum</i> | 86  | 334 | 419 |
| LinJ34_V3.2740 | <i>L. infantum</i> | 40  | 393 | 432 |
| LinJ34_V3.2760 | <i>L. infantum</i> | 57  | 58  | 114 |
| LinJ34_V3.2780 | <i>L. infantum</i> | 47  | 216 | 262 |
| LinJ34_V3.2790 | <i>L. infantum</i> | 63  | 168 | 230 |
| LinJ34_V3.2800 | <i>L. infantum</i> | 102 | 81  | 182 |
| LinJ34_V3.2820 | <i>L. infantum</i> | 90  | 110 | 199 |
| LinJ34_V3.2830 | <i>L. infantum</i> | 94  | 1   | 94  |
| LinJ34_V3.2830 | <i>L. infantum</i> | 268 | 164 | 431 |
| LinJ34_V3.2830 | <i>L. infantum</i> | 58  | 443 | 500 |
| LinJ34_V3.2830 | <i>L. infantum</i> | 53  | 541 | 593 |
| LinJ34_V3.2840 | <i>L. infantum</i> | 42  | 208 | 249 |
| LinJ34_V3.2850 | <i>L. infantum</i> | 269 | 28  | 296 |
| LinJ34_V3.2850 | <i>L. infantum</i> | 44  | 328 | 371 |
| LinJ34_V3.2850 | <i>L. infantum</i> | 313 | 629 | 941 |
| LinJ34_V3.2860 | <i>L. infantum</i> | 127 | 1   | 127 |
| LinJ34_V3.2870 | <i>L. infantum</i> | 48  | 110 | 157 |
| LinJ34_V3.2870 | <i>L. infantum</i> | 76  | 196 | 271 |
| LinJ34_V3.2870 | <i>L. infantum</i> | 46  | 382 | 427 |
| LinJ34_V3.2890 | <i>L. infantum</i> | 80  | 59  | 138 |



|                |                    |     |      |      |
|----------------|--------------------|-----|------|------|
| LinJ34_V3.2900 | <i>L. infantum</i> | 78  | 33   | 110  |
| LinJ34_V3.2900 | <i>L. infantum</i> | 60  | 235  | 294  |
| LinJ34_V3.2900 | <i>L. infantum</i> | 60  | 235  | 294  |
| LinJ34_V3.2920 | <i>L. infantum</i> | 50  | 1    | 50   |
| LinJ34_V3.2920 | <i>L. infantum</i> | 71  | 184  | 254  |
| LinJ34_V3.2930 | <i>L. infantum</i> | 86  | 1    | 86   |
| LinJ34_V3.2940 | <i>L. infantum</i> | 53  | 1    | 53   |
| LinJ34_V3.2940 | <i>L. infantum</i> | 176 | 93   | 268  |
| LinJ34_V3.2940 | <i>L. infantum</i> | 43  | 546  | 588  |
| LinJ34_V3.2950 | <i>L. infantum</i> | 152 | 86   | 237  |
| LinJ34_V3.2950 | <i>L. infantum</i> | 162 | 273  | 434  |
| LinJ34_V3.2950 | <i>L. infantum</i> | 162 | 273  | 434  |
| LinJ34_V3.2960 | <i>L. infantum</i> | 322 | 81   | 402  |
| LinJ34_V3.2970 | <i>L. infantum</i> | 50  | 60   | 109  |
| LinJ34_V3.2970 | <i>L. infantum</i> | 67  | 421  | 487  |
| LinJ34_V3.2970 | <i>L. infantum</i> | 67  | 421  | 487  |
| LinJ34_V3.2980 | <i>L. infantum</i> | 44  | 171  | 214  |
| LinJ34_V3.2980 | <i>L. infantum</i> | 46  | 276  | 321  |
| LinJ34_V3.2980 | <i>L. infantum</i> | 238 | 783  | 1020 |
| LinJ34_V3.3000 | <i>L. infantum</i> | 54  | 1    | 54   |
| LinJ34_V3.3010 | <i>L. infantum</i> | 56  | 188  | 243  |
| LinJ34_V3.3010 | <i>L. infantum</i> | 55  | 362  | 416  |
| LinJ34_V3.3010 | <i>L. infantum</i> | 48  | 558  | 605  |
| LinJ34_V3.3010 | <i>L. infantum</i> | 125 | 710  | 834  |
| LinJ34_V3.3010 | <i>L. infantum</i> | 70  | 982  | 1051 |
| LinJ34_V3.3010 | <i>L. infantum</i> | 41  | 1463 | 1503 |
| LinJ34_V3.3010 | <i>L. infantum</i> | 70  | 1584 | 1653 |
| LinJ34_V3.3010 | <i>L. infantum</i> | 42  | 1882 | 1923 |
| LinJ34_V3.3030 | <i>L. infantum</i> | 52  | 532  | 583  |
| LinJ34_V3.3040 | <i>L. infantum</i> | 40  | 432  | 471  |
| LinJ34_V3.3040 | <i>L. infantum</i> | 58  | 476  | 533  |
| LinJ34_V3.3040 | <i>L. infantum</i> | 84  | 675  | 758  |
| LinJ34_V3.3040 | <i>L. infantum</i> | 43  | 770  | 812  |
| LinJ34_V3.3050 | <i>L. infantum</i> | 40  | 1    | 40   |
| LinJ34_V3.3050 | <i>L. infantum</i> | 60  | 126  | 185  |
| LinJ34_V3.3050 | <i>L. infantum</i> | 60  | 126  | 185  |
| LinJ34_V3.3060 | <i>L. infantum</i> | 49  | 208  | 256  |
| LinJ34_V3.3060 | <i>L. infantum</i> | 97  | 349  | 445  |
| LinJ34_V3.3060 | <i>L. infantum</i> | 53  | 476  | 528  |
| LinJ34_V3.3060 | <i>L. infantum</i> | 57  | 531  | 587  |
| LinJ34_V3.3070 | <i>L. infantum</i> | 41  | 387  | 427  |
| LinJ34_V3.3100 | <i>L. infantum</i> | 43  | 1    | 43   |
| LinJ34_V3.3100 | <i>L. infantum</i> | 48  | 106  | 153  |
| LinJ34_V3.3100 | <i>L. infantum</i> | 48  | 106  | 153  |
| LinJ34_V3.3130 | <i>L. infantum</i> | 41  | 99   | 139  |
| LinJ34_V3.3130 | <i>L. infantum</i> | 115 | 384  | 498  |
| LinJ34_V3.3130 | <i>L. infantum</i> | 115 | 384  | 498  |

|                |                    |     |      |      |
|----------------|--------------------|-----|------|------|
| LinJ34_V3.3170 | <i>L. infantum</i> | 59  | 224  | 282  |
| LinJ34_V3.3170 | <i>L. infantum</i> | 89  | 367  | 455  |
| LinJ34_V3.3170 | <i>L. infantum</i> | 44  | 686  | 729  |
| LinJ34_V3.3180 | <i>L. infantum</i> | 56  | 244  | 299  |
| LinJ34_V3.3190 | <i>L. infantum</i> | 62  | 29   | 90   |
| LinJ34_V3.3200 | <i>L. infantum</i> | 55  | 400  | 454  |
| LinJ34_V3.3210 | <i>L. infantum</i> | 43  | 548  | 590  |
| LinJ34_V3.3220 | <i>L. infantum</i> | 171 | 465  | 635  |
| LinJ34_V3.3230 | <i>L. infantum</i> | 51  | 64   | 114  |
| LinJ34_V3.3230 | <i>L. infantum</i> | 137 | 297  | 433  |
| LinJ34_V3.3230 | <i>L. infantum</i> | 151 | 511  | 661  |
| LinJ34_V3.3230 | <i>L. infantum</i> | 408 | 772  | 1179 |
| LinJ34_V3.3260 | <i>L. infantum</i> | 43  | 1    | 43   |
| LinJ34_V3.3270 | <i>L. infantum</i> | 67  | 52   | 118  |
| LinJ34_V3.3310 | <i>L. infantum</i> | 55  | 1357 | 1411 |
| LinJ34_V3.3310 | <i>L. infantum</i> | 49  | 1897 | 1945 |
| LinJ34_V3.3310 | <i>L. infantum</i> | 49  | 1897 | 1945 |
| LinJ34_V3.3330 | <i>L. infantum</i> | 241 | 98   | 338  |
| LinJ34_V3.3340 | <i>L. infantum</i> | 147 | 195  | 341  |
| LinJ34_V3.3350 | <i>L. infantum</i> | 434 | 36   | 469  |
| LinJ34_V3.3350 | <i>L. infantum</i> | 214 | 481  | 694  |
| LinJ34_V3.3350 | <i>L. infantum</i> | 225 | 716  | 940  |
| LinJ34_V3.3360 | <i>L. infantum</i> | 70  | 62   | 131  |
| LinJ34_V3.3360 | <i>L. infantum</i> | 42  | 782  | 823  |
| LinJ34_V3.3360 | <i>L. infantum</i> | 42  | 782  | 823  |
| LinJ34_V3.3370 | <i>L. infantum</i> | 43  | 122  | 164  |
| LinJ34_V3.3370 | <i>L. infantum</i> | 82  | 260  | 341  |
| LinJ34_V3.3370 | <i>L. infantum</i> | 82  | 260  | 341  |
| LinJ34_V3.3420 | <i>L. infantum</i> | 79  | 84   | 162  |
| LinJ34_V3.3480 | <i>L. infantum</i> | 125 | 14   | 138  |
| LinJ34_V3.3480 | <i>L. infantum</i> | 53  | 282  | 334  |
| LinJ34_V3.3480 | <i>L. infantum</i> | 44  | 453  | 496  |
| LinJ34_V3.3480 | <i>L. infantum</i> | 62  | 584  | 645  |
| LinJ34_V3.3480 | <i>L. infantum</i> | 68  | 835  | 902  |
| LinJ34_V3.3480 | <i>L. infantum</i> | 48  | 1079 | 1126 |
| LinJ34_V3.3480 | <i>L. infantum</i> | 47  | 1232 | 1278 |
| LinJ34_V3.3480 | <i>L. infantum</i> | 65  | 1310 | 1374 |
| LinJ34_V3.3490 | <i>L. infantum</i> | 55  | 179  | 233  |
| LinJ34_V3.3500 | <i>L. infantum</i> | 134 | 50   | 183  |
| LinJ34_V3.3520 | <i>L. infantum</i> | 78  | 1    | 78   |
| LinJ34_V3.3540 | <i>L. infantum</i> | 246 | 172  | 417  |
| LinJ34_V3.3550 | <i>L. infantum</i> | 107 | 1    | 107  |
| LinJ34_V3.3550 | <i>L. infantum</i> | 158 | 279  | 436  |
| LinJ34_V3.3570 | <i>L. infantum</i> | 60  | 1    | 60   |
| LinJ34_V3.3570 | <i>L. infantum</i> | 66  | 125  | 190  |
| LinJ34_V3.3570 | <i>L. infantum</i> | 66  | 125  | 190  |
| LinJ34_V3.3590 | <i>L. infantum</i> | 68  | 641  | 708  |

|                |                    |     |      |      |
|----------------|--------------------|-----|------|------|
| LinJ34_V3.3590 | <i>L. infantum</i> | 41  | 811  | 851  |
| LinJ34_V3.3590 | <i>L. infantum</i> | 54  | 930  | 983  |
| LinJ34_V3.3630 | <i>L. infantum</i> | 74  | 1    | 74   |
| LinJ34_V3.3630 | <i>L. infantum</i> | 53  | 106  | 158  |
| LinJ34_V3.3630 | <i>L. infantum</i> | 61  | 229  | 289  |
| LinJ34_V3.3640 | <i>L. infantum</i> | 233 | 1    | 233  |
| LinJ34_V3.3650 | <i>L. infantum</i> | 40  | 111  | 150  |
| LinJ34_V3.3680 | <i>L. infantum</i> | 140 | 95   | 234  |
| LinJ34_V3.3680 | <i>L. infantum</i> | 79  | 645  | 723  |
| LinJ34_V3.3680 | <i>L. infantum</i> | 79  | 645  | 723  |
| LinJ34_V3.3690 | <i>L. infantum</i> | 48  | 2593 | 2640 |
| LinJ34_V3.3690 | <i>L. infantum</i> | 84  | 3195 | 3278 |
| LinJ34_V3.3690 | <i>L. infantum</i> | 67  | 3402 | 3468 |
| LinJ34_V3.3690 | <i>L. infantum</i> | 42  | 3760 | 3801 |
| LinJ34_V3.3710 | <i>L. infantum</i> | 82  | 127  | 208  |
| LinJ34_V3.3730 | <i>L. infantum</i> | 67  | 1    | 67   |
| LinJ34_V3.3730 | <i>L. infantum</i> | 84  | 136  | 219  |
| LinJ34_V3.3730 | <i>L. infantum</i> | 76  | 374  | 449  |
| LinJ34_V3.3750 | <i>L. infantum</i> | 140 | 2437 | 2576 |
| LinJ34_V3.3760 | <i>L. infantum</i> | 103 | 40   | 142  |
| LinJ34_V3.3790 | <i>L. infantum</i> | 49  | 228  | 276  |
| LinJ34_V3.3790 | <i>L. infantum</i> | 40  | 353  | 392  |
| LinJ34_V3.3790 | <i>L. infantum</i> | 46  | 602  | 647  |
| LinJ34_V3.3800 | <i>L. infantum</i> | 110 | 609  | 718  |
| LinJ34_V3.3850 | <i>L. infantum</i> | 138 | 1    | 138  |
| LinJ34_V3.3870 | <i>L. infantum</i> | 50  | 36   | 85   |
| LinJ34_V3.3880 | <i>L. infantum</i> | 50  | 1    | 50   |
| LinJ34_V3.3880 | <i>L. infantum</i> | 71  | 113  | 183  |
| LinJ34_V3.3880 | <i>L. infantum</i> | 51  | 540  | 590  |
| LinJ34_V3.3880 | <i>L. infantum</i> | 84  | 593  | 676  |
| LinJ34_V3.3900 | <i>L. infantum</i> | 75  | 1    | 75   |
| LinJ34_V3.3910 | <i>L. infantum</i> | 48  | 219  | 266  |
| LinJ34_V3.3920 | <i>L. infantum</i> | 45  | 1    | 45   |
| LinJ34_V3.3920 | <i>L. infantum</i> | 252 | 129  | 380  |
| LinJ34_V3.3930 | <i>L. infantum</i> | 53  | 16   | 68   |
| LinJ34_V3.3930 | <i>L. infantum</i> | 41  | 133  | 173  |
| LinJ34_V3.3930 | <i>L. infantum</i> | 41  | 133  | 173  |
| LinJ34_V3.3940 | <i>L. infantum</i> | 54  | 351  | 404  |
| LinJ34_V3.3940 | <i>L. infantum</i> | 49  | 965  | 1013 |
| LinJ34_V3.3940 | <i>L. infantum</i> | 43  | 1295 | 1337 |
| LinJ34_V3.3940 | <i>L. infantum</i> | 43  | 2037 | 2079 |
| LinJ34_V3.3940 | <i>L. infantum</i> | 65  | 2362 | 2426 |
| LinJ34_V3.3970 | <i>L. infantum</i> | 107 | 1    | 107  |
| LinJ34_V3.3970 | <i>L. infantum</i> | 127 | 133  | 259  |
| LinJ34_V3.3970 | <i>L. infantum</i> | 83  | 272  | 354  |
| LinJ34_V3.3970 | <i>L. infantum</i> | 97  | 356  | 452  |
| LinJ34_V3.3980 | <i>L. infantum</i> | 43  | 424  | 466  |

|                |                    |     |      |      |
|----------------|--------------------|-----|------|------|
| LinJ34_V3.3990 | <i>L. infantum</i> | 94  | 999  | 1092 |
| LinJ34_V3.3990 | <i>L. infantum</i> | 83  | 2832 | 2914 |
| LinJ34_V3.3990 | <i>L. infantum</i> | 75  | 3043 | 3117 |
| LinJ34_V3.3990 | <i>L. infantum</i> | 61  | 3347 | 3407 |
| LinJ34_V3.4000 | <i>L. infantum</i> | 149 | 1    | 149  |
| LinJ34_V3.4010 | <i>L. infantum</i> | 112 | 38   | 149  |
| LinJ34_V3.4040 | <i>L. infantum</i> | 299 | 66   | 364  |
| LinJ34_V3.4040 | <i>L. infantum</i> | 83  | 406  | 488  |
| LinJ34_V3.4070 | <i>L. infantum</i> | 148 | 113  | 260  |
| LinJ34_V3.4080 | <i>L. infantum</i> | 91  | 22   | 112  |
| LinJ34_V3.4080 | <i>L. infantum</i> | 48  | 222  | 269  |
| LinJ34_V3.4090 | <i>L. infantum</i> | 52  | 1    | 52   |
| LinJ34_V3.4090 | <i>L. infantum</i> | 42  | 295  | 336  |
| LinJ34_V3.4090 | <i>L. infantum</i> | 195 | 438  | 632  |
| LinJ34_V3.4090 | <i>L. infantum</i> | 193 | 655  | 847  |
| LinJ34_V3.4100 | <i>L. infantum</i> | 42  | 1    | 42   |
| LinJ34_V3.4110 | <i>L. infantum</i> | 72  | 291  | 362  |
| LinJ34_V3.4120 | <i>L. infantum</i> | 55  | 1    | 55   |
| LinJ34_V3.4120 | <i>L. infantum</i> | 106 | 106  | 211  |
| LinJ34_V3.4140 | <i>L. infantum</i> | 68  | 820  | 887  |
| LinJ34_V3.4140 | <i>L. infantum</i> | 46  | 1085 | 1130 |
| LinJ34_V3.4140 | <i>L. infantum</i> | 46  | 1085 | 1130 |
| LinJ34_V3.4160 | <i>L. infantum</i> | 88  | 1338 | 1425 |
| LinJ34_V3.4160 | <i>L. infantum</i> | 46  | 2321 | 2366 |
| LinJ34_V3.4160 | <i>L. infantum</i> | 46  | 2321 | 2366 |
| LinJ34_V3.4170 | <i>L. infantum</i> | 91  | 18   | 108  |
| LinJ34_V3.4180 | <i>L. infantum</i> | 74  | 1    | 74   |
| LinJ34_V3.4190 | <i>L. infantum</i> | 40  | 1    | 40   |
| LinJ34_V3.4190 | <i>L. infantum</i> | 147 | 180  | 326  |
| LinJ34_V3.4230 | <i>L. infantum</i> | 117 | 1    | 117  |
| LinJ34_V3.4240 | <i>L. infantum</i> | 44  | 335  | 378  |
| LinJ34_V3.4240 | <i>L. infantum</i> | 45  | 426  | 470  |
| LinJ34_V3.4240 | <i>L. infantum</i> | 45  | 426  | 470  |
| LinJ34_V3.4290 | <i>L. infantum</i> | 40  | 302  | 341  |
| LinJ34_V3.4300 | <i>L. infantum</i> | 47  | 56   | 102  |
| LinJ34_V3.4320 | <i>L. infantum</i> | 59  | 1    | 59   |
| LinJ34_V3.4320 | <i>L. infantum</i> | 148 | 74   | 221  |
| LinJ34_V3.4320 | <i>L. infantum</i> | 58  | 414  | 471  |
| LinJ34_V3.4330 | <i>L. infantum</i> | 75  | 70   | 144  |
| LinJ34_V3.4330 | <i>L. infantum</i> | 169 | 575  | 743  |
| LinJ35_V3.0010 | <i>L. infantum</i> | 91  | 1    | 91   |
| LinJ35_V3.0020 | <i>L. infantum</i> | 49  | 1    | 49   |
| LinJ35_V3.0060 | <i>L. infantum</i> | 480 | 174  | 653  |
| LinJ35_V3.0070 | <i>L. infantum</i> | 41  | 194  | 234  |
| LinJ35_V3.0080 | <i>L. infantum</i> | 41  | 1    | 41   |
| LinJ35_V3.0090 | <i>L. infantum</i> | 175 | 1    | 175  |
| LinJ35_V3.0090 | <i>L. infantum</i> | 49  | 213  | 261  |

|                |                    |     |      |      |
|----------------|--------------------|-----|------|------|
| LinJ35_V3.0090 | <i>L. infantum</i> | 49  | 213  | 261  |
| LinJ35_V3.0170 | <i>L. infantum</i> | 119 | 20   | 138  |
| LinJ35_V3.0170 | <i>L. infantum</i> | 53  | 225  | 277  |
| LinJ35_V3.0170 | <i>L. infantum</i> | 53  | 225  | 277  |
| LinJ35_V3.0180 | <i>L. infantum</i> | 321 | 1    | 321  |
| LinJ35_V3.0180 | <i>L. infantum</i> | 65  | 385  | 449  |
| LinJ35_V3.0180 | <i>L. infantum</i> | 60  | 457  | 516  |
| LinJ35_V3.0180 | <i>L. infantum</i> | 58  | 536  | 593  |
| LinJ35_V3.0180 | <i>L. infantum</i> | 147 | 598  | 744  |
| LinJ35_V3.0180 | <i>L. infantum</i> | 83  | 780  | 862  |
| LinJ35_V3.0200 | <i>L. infantum</i> | 331 | 71   | 401  |
| LinJ35_V3.0200 | <i>L. infantum</i> | 50  | 468  | 517  |
| LinJ35_V3.0200 | <i>L. infantum</i> | 60  | 609  | 668  |
| LinJ35_V3.0200 | <i>L. infantum</i> | 154 | 733  | 886  |
| LinJ35_V3.0200 | <i>L. infantum</i> | 92  | 930  | 1021 |
| LinJ35_V3.0200 | <i>L. infantum</i> | 56  | 1230 | 1285 |
| LinJ35_V3.0200 | <i>L. infantum</i> | 128 | 1381 | 1508 |
| LinJ35_V3.0200 | <i>L. infantum</i> | 161 | 1556 | 1716 |
| LinJ35_V3.0200 | <i>L. infantum</i> | 157 | 1767 | 1923 |
| LinJ35_V3.0200 | <i>L. infantum</i> | 179 | 1945 | 2123 |
| LinJ35_V3.0220 | <i>L. infantum</i> | 104 | 160  | 263  |
| LinJ35_V3.0230 | <i>L. infantum</i> | 81  | 116  | 196  |
| LinJ35_V3.0230 | <i>L. infantum</i> | 69  | 277  | 345  |
| LinJ35_V3.0250 | <i>L. infantum</i> | 59  | 122  | 180  |
| LinJ35_V3.0250 | <i>L. infantum</i> | 137 | 308  | 444  |
| LinJ35_V3.0260 | <i>L. infantum</i> | 122 | 135  | 256  |
| LinJ35_V3.0260 | <i>L. infantum</i> | 48  | 378  | 425  |
| LinJ35_V3.0260 | <i>L. infantum</i> | 48  | 378  | 425  |
| LinJ35_V3.0290 | <i>L. infantum</i> | 481 | 14   | 494  |
| LinJ35_V3.0290 | <i>L. infantum</i> | 43  | 800  | 842  |
| LinJ35_V3.0290 | <i>L. infantum</i> | 42  | 1052 | 1093 |
| LinJ35_V3.0300 | <i>L. infantum</i> | 120 | 19   | 138  |
| LinJ35_V3.0300 | <i>L. infantum</i> | 130 | 157  | 286  |
| LinJ35_V3.0310 | <i>L. infantum</i> | 62  | 301  | 362  |
| LinJ35_V3.0320 | <i>L. infantum</i> | 44  | 1    | 44   |
| LinJ35_V3.0340 | <i>L. infantum</i> | 53  | 150  | 202  |
| LinJ35_V3.0340 | <i>L. infantum</i> | 46  | 324  | 369  |
| LinJ35_V3.0340 | <i>L. infantum</i> | 46  | 324  | 369  |
| LinJ35_V3.0350 | <i>L. infantum</i> | 65  | 78   | 142  |
| LinJ35_V3.0350 | <i>L. infantum</i> | 44  | 158  | 201  |
| LinJ35_V3.0350 | <i>L. infantum</i> | 87  | 438  | 524  |
| LinJ35_V3.0370 | <i>L. infantum</i> | 59  | 1    | 59   |
| LinJ35_V3.0380 | <i>L. infantum</i> | 187 | 1    | 187  |
| LinJ35_V3.0380 | <i>L. infantum</i> | 118 | 228  | 345  |
| LinJ35_V3.0380 | <i>L. infantum</i> | 75  | 358  | 432  |
| LinJ35_V3.0380 | <i>L. infantum</i> | 46  | 556  | 601  |
| LinJ35_V3.0390 | <i>L. infantum</i> | 90  | 30   | 119  |

|                |                    |      |      |      |
|----------------|--------------------|------|------|------|
| LinJ35_V3.0390 | <i>L. infantum</i> | 57   | 164  | 220  |
| LinJ35_V3.0390 | <i>L. infantum</i> | 48   | 315  | 362  |
| LinJ35_V3.0390 | <i>L. infantum</i> | 59   | 452  | 510  |
| LinJ35_V3.0420 | <i>L. infantum</i> | 66   | 1    | 66   |
| LinJ35_V3.0420 | <i>L. infantum</i> | 63   | 103  | 165  |
| LinJ35_V3.0420 | <i>L. infantum</i> | 182  | 193  | 374  |
| LinJ35_V3.0430 | <i>L. infantum</i> | 42   | 150  | 191  |
| LinJ35_V3.0430 | <i>L. infantum</i> | 56   | 256  | 311  |
| LinJ35_V3.0430 | <i>L. infantum</i> | 57   | 348  | 404  |
| LinJ35_V3.0440 | <i>L. infantum</i> | 83   | 66   | 148  |
| LinJ35_V3.0440 | <i>L. infantum</i> | 103  | 359  | 461  |
| LinJ35_V3.0450 | <i>L. infantum</i> | 223  | 695  | 917  |
| LinJ35_V3.0460 | <i>L. infantum</i> | 62   | 1    | 62   |
| LinJ35_V3.0460 | <i>L. infantum</i> | 75   | 126  | 200  |
| LinJ35_V3.0460 | <i>L. infantum</i> | 75   | 126  | 200  |
| LinJ35_V3.0480 | <i>L. infantum</i> | 414  | 281  | 694  |
| LinJ35_V3.0480 | <i>L. infantum</i> | 139  | 789  | 927  |
| LinJ35_V3.0480 | <i>L. infantum</i> | 99   | 1100 | 1198 |
| LinJ35_V3.0480 | <i>L. infantum</i> | 301  | 1285 | 1585 |
| LinJ35_V3.0490 | <i>L. infantum</i> | 4793 | 645  | 5437 |
| LinJ35_V3.0500 | <i>L. infantum</i> | 56   | 151  | 206  |
| LinJ35_V3.0500 | <i>L. infantum</i> | 41   | 491  | 531  |
| LinJ35_V3.0500 | <i>L. infantum</i> | 63   | 1803 | 1865 |
| LinJ35_V3.0530 | <i>L. infantum</i> | 285  | 599  | 883  |
| LinJ35_V3.0530 | <i>L. infantum</i> | 45   | 5464 | 5508 |
| LinJ35_V3.0540 | <i>L. infantum</i> | 254  | 539  | 792  |
| LinJ35_V3.0560 | <i>L. infantum</i> | 413  | 1    | 413  |
| LinJ35_V3.0560 | <i>L. infantum</i> | 101  | 436  | 536  |
| LinJ35_V3.0560 | <i>L. infantum</i> | 160  | 559  | 718  |
| LinJ35_V3.0560 | <i>L. infantum</i> | 51   | 745  | 795  |
| LinJ35_V3.0570 | <i>L. infantum</i> | 68   | 140  | 207  |
| LinJ35_V3.0570 | <i>L. infantum</i> | 46   | 420  | 465  |
| LinJ35_V3.0570 | <i>L. infantum</i> | 50   | 506  | 555  |
| LinJ35_V3.0570 | <i>L. infantum</i> | 342  | 1320 | 1661 |
| LinJ35_V3.0570 | <i>L. infantum</i> | 89   | 1702 | 1790 |
| LinJ35_V3.0570 | <i>L. infantum</i> | 40   | 1903 | 1942 |
| LinJ35_V3.0570 | <i>L. infantum</i> | 142  | 1983 | 2124 |
| LinJ35_V3.0580 | <i>L. infantum</i> | 224  | 1    | 224  |
| LinJ35_V3.0590 | <i>L. infantum</i> | 96   | 254  | 349  |
| LinJ35_V3.0590 | <i>L. infantum</i> | 50   | 368  | 417  |
| LinJ35_V3.0590 | <i>L. infantum</i> | 64   | 624  | 687  |
| LinJ35_V3.0610 | <i>L. infantum</i> | 60   | 26   | 85   |
| LinJ35_V3.0610 | <i>L. infantum</i> | 99   | 144  | 242  |
| LinJ35_V3.0610 | <i>L. infantum</i> | 90   | 432  | 521  |
| LinJ35_V3.0610 | <i>L. infantum</i> | 85   | 852  | 936  |
| LinJ35_V3.0610 | <i>L. infantum</i> | 56   | 986  | 1041 |
| LinJ35_V3.0610 | <i>L. infantum</i> | 56   | 1078 | 1133 |

|                |                    |     |      |      |
|----------------|--------------------|-----|------|------|
| LinJ35_V3.0610 | <i>L. infantum</i> | 51  | 1146 | 1196 |
| LinJ35_V3.0610 | <i>L. infantum</i> | 50  | 1706 | 1755 |
| LinJ35_V3.0610 | <i>L. infantum</i> | 42  | 1818 | 1859 |
| LinJ35_V3.0610 | <i>L. infantum</i> | 49  | 2054 | 2102 |
| LinJ35_V3.0610 | <i>L. infantum</i> | 42  | 2133 | 2174 |
| LinJ35_V3.0610 | <i>L. infantum</i> | 66  | 2298 | 2363 |
| LinJ35_V3.0610 | <i>L. infantum</i> | 76  | 2423 | 2498 |
| LinJ35_V3.0630 | <i>L. infantum</i> | 74  | 1    | 74   |
| LinJ35_V3.0630 | <i>L. infantum</i> | 139 | 184  | 322  |
| LinJ35_V3.0630 | <i>L. infantum</i> | 54  | 403  | 456  |
| LinJ35_V3.0650 | <i>L. infantum</i> | 59  | 44   | 102  |
| LinJ35_V3.0660 | <i>L. infantum</i> | 91  | 1    | 91   |
| LinJ35_V3.0670 | <i>L. infantum</i> | 267 | 26   | 292  |
| LinJ35_V3.0670 | <i>L. infantum</i> | 126 | 342  | 467  |
| LinJ35_V3.0670 | <i>L. infantum</i> | 50  | 520  | 569  |
| LinJ35_V3.0670 | <i>L. infantum</i> | 77  | 612  | 688  |
| LinJ35_V3.0670 | <i>L. infantum</i> | 94  | 949  | 1042 |
| LinJ35_V3.0680 | <i>L. infantum</i> | 52  | 273  | 324  |
| LinJ35_V3.0680 | <i>L. infantum</i> | 57  | 481  | 537  |
| LinJ35_V3.0680 | <i>L. infantum</i> | 66  | 719  | 784  |
| LinJ35_V3.0680 | <i>L. infantum</i> | 69  | 837  | 905  |
| LinJ35_V3.0680 | <i>L. infantum</i> | 58  | 946  | 1003 |
| LinJ35_V3.0680 | <i>L. infantum</i> | 45  | 1019 | 1063 |
| LinJ35_V3.0680 | <i>L. infantum</i> | 41  | 1071 | 1111 |
| LinJ35_V3.0680 | <i>L. infantum</i> | 51  | 1319 | 1369 |
| LinJ35_V3.0680 | <i>L. infantum</i> | 49  | 1711 | 1759 |
| LinJ35_V3.0680 | <i>L. infantum</i> | 104 | 2146 | 2249 |
| LinJ35_V3.0680 | <i>L. infantum</i> | 43  | 2680 | 2722 |
| LinJ35_V3.0680 | <i>L. infantum</i> | 93  | 2880 | 2972 |
| LinJ35_V3.0680 | <i>L. infantum</i> | 112 | 3265 | 3376 |
| LinJ35_V3.0680 | <i>L. infantum</i> | 55  | 4073 | 4127 |
| LinJ35_V3.0680 | <i>L. infantum</i> | 47  | 4134 | 4180 |
| LinJ35_V3.0690 | <i>L. infantum</i> | 244 | 1    | 244  |
| LinJ35_V3.0690 | <i>L. infantum</i> | 147 | 285  | 431  |
| LinJ35_V3.0690 | <i>L. infantum</i> | 180 | 461  | 640  |
| LinJ35_V3.0700 | <i>L. infantum</i> | 41  | 582  | 622  |
| LinJ35_V3.0720 | <i>L. infantum</i> | 49  | 109  | 157  |
| LinJ35_V3.0730 | <i>L. infantum</i> | 40  | 385  | 424  |
| LinJ35_V3.0730 | <i>L. infantum</i> | 43  | 459  | 501  |
| LinJ35_V3.0730 | <i>L. infantum</i> | 43  | 459  | 501  |
| LinJ35_V3.0750 | <i>L. infantum</i> | 74  | 225  | 298  |
| LinJ35_V3.0750 | <i>L. infantum</i> | 60  | 386  | 445  |
| LinJ35_V3.0750 | <i>L. infantum</i> | 53  | 474  | 526  |
| LinJ35_V3.0770 | <i>L. infantum</i> | 56  | 114  | 169  |
| LinJ35_V3.0780 | <i>L. infantum</i> | 71  | 221  | 291  |
| LinJ35_V3.0790 | <i>L. infantum</i> | 91  | 151  | 241  |
| LinJ35_V3.0810 | <i>L. infantum</i> | 53  | 1    | 53   |

|                |                    |     |      |      |
|----------------|--------------------|-----|------|------|
| LinJ35_V3.0810 | <i>L. infantum</i> | 63  | 123  | 185  |
| LinJ35_V3.0810 | <i>L. infantum</i> | 62  | 315  | 376  |
| LinJ35_V3.0820 | <i>L. infantum</i> | 308 | 61   | 368  |
| LinJ35_V3.0820 | <i>L. infantum</i> | 128 | 391  | 518  |
| LinJ35_V3.0820 | <i>L. infantum</i> | 183 | 601  | 783  |
| LinJ35_V3.0820 | <i>L. infantum</i> | 95  | 799  | 893  |
| LinJ35_V3.0820 | <i>L. infantum</i> | 93  | 906  | 998  |
| LinJ35_V3.0830 | <i>L. infantum</i> | 148 | 1    | 148  |
| LinJ35_V3.0830 | <i>L. infantum</i> | 212 | 170  | 381  |
| LinJ35_V3.0830 | <i>L. infantum</i> | 300 | 383  | 682  |
| LinJ35_V3.0830 | <i>L. infantum</i> | 320 | 691  | 1010 |
| LinJ35_V3.0830 | <i>L. infantum</i> | 384 | 1015 | 1398 |
| LinJ35_V3.0830 | <i>L. infantum</i> | 87  | 1421 | 1507 |
| LinJ35_V3.0830 | <i>L. infantum</i> | 41  | 1534 | 1574 |
| LinJ35_V3.0850 | <i>L. infantum</i> | 43  | 264  | 306  |
| LinJ35_V3.0860 | <i>L. infantum</i> | 97  | 50   | 146  |
| LinJ35_V3.0860 | <i>L. infantum</i> | 51  | 172  | 222  |
| LinJ35_V3.0860 | <i>L. infantum</i> | 51  | 172  | 222  |
| LinJ35_V3.0870 | <i>L. infantum</i> | 42  | 367  | 408  |
| LinJ35_V3.0880 | <i>L. infantum</i> | 131 | 37   | 167  |
| LinJ35_V3.0900 | <i>L. infantum</i> | 70  | 1    | 70   |
| LinJ35_V3.0900 | <i>L. infantum</i> | 82  | 104  | 185  |
| LinJ35_V3.0900 | <i>L. infantum</i> | 44  | 213  | 256  |
| LinJ35_V3.0900 | <i>L. infantum</i> | 117 | 404  | 520  |
| LinJ35_V3.0910 | <i>L. infantum</i> | 51  | 56   | 106  |
| LinJ35_V3.0920 | <i>L. infantum</i> | 235 | 1    | 235  |
| LinJ35_V3.0930 | <i>L. infantum</i> | 208 | 1    | 208  |
| LinJ35_V3.0930 | <i>L. infantum</i> | 432 | 331  | 762  |
| LinJ35_V3.0930 | <i>L. infantum</i> | 441 | 802  | 1242 |
| LinJ35_V3.0930 | <i>L. infantum</i> | 50  | 1274 | 1323 |
| LinJ35_V3.0930 | <i>L. infantum</i> | 175 | 1325 | 1499 |
| LinJ35_V3.0930 | <i>L. infantum</i> | 43  | 1557 | 1599 |
| LinJ35_V3.0930 | <i>L. infantum</i> | 67  | 1616 | 1682 |
| LinJ35_V3.0930 | <i>L. infantum</i> | 48  | 1765 | 1812 |
| LinJ35_V3.0940 | <i>L. infantum</i> | 249 | 95   | 343  |
| LinJ35_V3.0940 | <i>L. infantum</i> | 60  | 427  | 486  |
| LinJ35_V3.0940 | <i>L. infantum</i> | 66  | 576  | 641  |
| LinJ35_V3.0940 | <i>L. infantum</i> | 44  | 869  | 912  |
| LinJ35_V3.0940 | <i>L. infantum</i> | 115 | 944  | 1058 |
| LinJ35_V3.0940 | <i>L. infantum</i> | 130 | 1206 | 1335 |
| LinJ35_V3.0950 | <i>L. infantum</i> | 47  | 1    | 47   |
| LinJ35_V3.0950 | <i>L. infantum</i> | 69  | 68   | 136  |
| LinJ35_V3.0950 | <i>L. infantum</i> | 69  | 68   | 136  |
| LinJ35_V3.0960 | <i>L. infantum</i> | 112 | 1    | 112  |
| LinJ35_V3.0960 | <i>L. infantum</i> | 55  | 130  | 184  |
| LinJ35_V3.0960 | <i>L. infantum</i> | 55  | 130  | 184  |
| LinJ35_V3.0970 | <i>L. infantum</i> | 142 | 74   | 215  |



|                |                    |     |     |      |
|----------------|--------------------|-----|-----|------|
| LinJ35_V3.0980 | <i>L. infantum</i> | 248 | 91  | 338  |
| LinJ35_V3.0980 | <i>L. infantum</i> | 96  | 441 | 536  |
| LinJ35_V3.0980 | <i>L. infantum</i> | 78  | 564 | 641  |
| LinJ35_V3.0980 | <i>L. infantum</i> | 59  | 684 | 742  |
| LinJ35_V3.1010 | <i>L. infantum</i> | 70  | 37  | 106  |
| LinJ35_V3.1010 | <i>L. infantum</i> | 77  | 261 | 337  |
| LinJ35_V3.1010 | <i>L. infantum</i> | 139 | 397 | 535  |
| LinJ35_V3.1010 | <i>L. infantum</i> | 258 | 579 | 836  |
| LinJ35_V3.1030 | <i>L. infantum</i> | 51  | 303 | 353  |
| LinJ35_V3.1040 | <i>L. infantum</i> | 104 | 40  | 143  |
| LinJ35_V3.1040 | <i>L. infantum</i> | 212 | 174 | 385  |
| LinJ35_V3.1060 | <i>L. infantum</i> | 118 | 69  | 186  |
| LinJ35_V3.1060 | <i>L. infantum</i> | 65  | 249 | 313  |
| LinJ35_V3.1070 | <i>L. infantum</i> | 152 | 338 | 489  |
| LinJ35_V3.1080 | <i>L. infantum</i> | 341 | 1   | 341  |
| LinJ35_V3.1080 | <i>L. infantum</i> | 70  | 394 | 463  |
| LinJ35_V3.1080 | <i>L. infantum</i> | 70  | 469 | 538  |
| LinJ35_V3.1090 | <i>L. infantum</i> | 96  | 152 | 247  |
| LinJ35_V3.1100 | <i>L. infantum</i> | 683 | 1   | 683  |
| LinJ35_V3.1100 | <i>L. infantum</i> | 186 | 687 | 872  |
| LinJ35_V3.1100 | <i>L. infantum</i> | 139 | 913 | 1051 |
| LinJ35_V3.1110 | <i>L. infantum</i> | 561 | 1   | 561  |
| LinJ35_V3.1110 | <i>L. infantum</i> | 105 | 588 | 692  |
| LinJ35_V3.1120 | <i>L. infantum</i> | 75  | 1   | 75   |
| LinJ35_V3.1120 | <i>L. infantum</i> | 41  | 131 | 171  |
| LinJ35_V3.1140 | <i>L. infantum</i> | 45  | 1   | 45   |
| LinJ35_V3.1140 | <i>L. infantum</i> | 46  | 508 | 553  |
| LinJ35_V3.1140 | <i>L. infantum</i> | 46  | 508 | 553  |
| LinJ35_V3.1150 | <i>L. infantum</i> | 41  | 744 | 784  |
| LinJ35_V3.1180 | <i>L. infantum</i> | 47  | 1   | 47   |
| LinJ35_V3.1180 | <i>L. infantum</i> | 151 | 68  | 218  |
| LinJ35_V3.1180 | <i>L. infantum</i> | 42  | 285 | 326  |
| LinJ35_V3.1180 | <i>L. infantum</i> | 101 | 509 | 609  |
| LinJ35_V3.1250 | <i>L. infantum</i> | 162 | 1   | 162  |
| LinJ35_V3.1250 | <i>L. infantum</i> | 142 | 242 | 383  |
| LinJ35_V3.1250 | <i>L. infantum</i> | 148 | 410 | 557  |
| LinJ35_V3.1250 | <i>L. infantum</i> | 66  | 604 | 669  |
| LinJ35_V3.1250 | <i>L. infantum</i> | 145 | 703 | 847  |
| LinJ35_V3.1270 | <i>L. infantum</i> | 46  | 316 | 361  |
| LinJ35_V3.1280 | <i>L. infantum</i> | 62  | 35  | 96   |
| LinJ35_V3.1280 | <i>L. infantum</i> | 102 | 200 | 301  |
| LinJ35_V3.1300 | <i>L. infantum</i> | 51  | 104 | 154  |
| LinJ35_V3.1300 | <i>L. infantum</i> | 54  | 196 | 249  |
| LinJ35_V3.1300 | <i>L. infantum</i> | 54  | 196 | 249  |
| LinJ35_V3.1320 | <i>L. infantum</i> | 47  | 1   | 47   |
| LinJ35_V3.1330 | <i>L. infantum</i> | 81  | 73  | 153  |
| LinJ35_V3.1330 | <i>L. infantum</i> | 195 | 157 | 351  |

|                |                    |     |      |      |
|----------------|--------------------|-----|------|------|
| LinJ35_V3.1330 | <i>L. infantum</i> | 121 | 478  | 598  |
| LinJ35_V3.1330 | <i>L. infantum</i> | 121 | 667  | 787  |
| LinJ35_V3.1330 | <i>L. infantum</i> | 125 | 860  | 984  |
| LinJ35_V3.1330 | <i>L. infantum</i> | 46  | 990  | 1035 |
| LinJ35_V3.1330 | <i>L. infantum</i> | 88  | 1068 | 1155 |
| LinJ35_V3.1330 | <i>L. infantum</i> | 248 | 1229 | 1476 |
| LinJ35_V3.1330 | <i>L. infantum</i> | 55  | 1536 | 1590 |
| LinJ35_V3.1330 | <i>L. infantum</i> | 68  | 1622 | 1689 |
| LinJ35_V3.1350 | <i>L. infantum</i> | 59  | 162  | 220  |
| LinJ35_V3.1360 | <i>L. infantum</i> | 243 | 1    | 243  |
| LinJ35_V3.1370 | <i>L. infantum</i> | 103 | 61   | 163  |
| LinJ35_V3.1370 | <i>L. infantum</i> | 55  | 250  | 304  |
| LinJ35_V3.1370 | <i>L. infantum</i> | 120 | 330  | 449  |
| LinJ35_V3.1400 | <i>L. infantum</i> | 51  | 1    | 51   |
| LinJ35_V3.1400 | <i>L. infantum</i> | 69  | 116  | 184  |
| LinJ35_V3.1400 | <i>L. infantum</i> | 45  | 322  | 366  |
| LinJ35_V3.1400 | <i>L. infantum</i> | 122 | 559  | 680  |
| LinJ35_V3.1410 | <i>L. infantum</i> | 115 | 118  | 232  |
| LinJ35_V3.1420 | <i>L. infantum</i> | 44  | 498  | 541  |
| LinJ35_V3.1420 | <i>L. infantum</i> | 41  | 595  | 635  |
| LinJ35_V3.1420 | <i>L. infantum</i> | 41  | 595  | 635  |
| LinJ35_V3.1430 | <i>L. infantum</i> | 319 | 1    | 319  |
| LinJ35_V3.1440 | <i>L. infantum</i> | 63  | 198  | 260  |
| LinJ35_V3.1450 | <i>L. infantum</i> | 63  | 198  | 260  |
| LinJ35_V3.1460 | <i>L. infantum</i> | 57  | 1    | 57   |
| LinJ35_V3.1460 | <i>L. infantum</i> | 112 | 223  | 334  |
| LinJ35_V3.1460 | <i>L. infantum</i> | 70  | 379  | 448  |
| LinJ35_V3.1460 | <i>L. infantum</i> | 156 | 509  | 664  |
| LinJ35_V3.1460 | <i>L. infantum</i> | 56  | 735  | 790  |
| LinJ35_V3.1460 | <i>L. infantum</i> | 77  | 847  | 923  |
| LinJ35_V3.1460 | <i>L. infantum</i> | 42  | 951  | 992  |
| LinJ35_V3.1460 | <i>L. infantum</i> | 53  | 1143 | 1195 |
| LinJ35_V3.1460 | <i>L. infantum</i> | 54  | 1451 | 1504 |
| LinJ35_V3.1460 | <i>L. infantum</i> | 66  | 1704 | 1769 |
| LinJ35_V3.1460 | <i>L. infantum</i> | 115 | 1875 | 1989 |
| LinJ35_V3.1460 | <i>L. infantum</i> | 72  | 2039 | 2110 |
| LinJ35_V3.1460 | <i>L. infantum</i> | 143 | 2190 | 2332 |
| LinJ35_V3.1460 | <i>L. infantum</i> | 156 | 2379 | 2534 |
| LinJ35_V3.1460 | <i>L. infantum</i> | 284 | 2612 | 2895 |
| LinJ35_V3.1460 | <i>L. infantum</i> | 71  | 2994 | 3064 |
| LinJ35_V3.1480 | <i>L. infantum</i> | 61  | 20   | 80   |
| LinJ35_V3.1510 | <i>L. infantum</i> | 71  | 212  | 282  |
| LinJ35_V3.1510 | <i>L. infantum</i> | 288 | 297  | 584  |
| LinJ35_V3.1520 | <i>L. infantum</i> | 84  | 216  | 299  |
| LinJ35_V3.1520 | <i>L. infantum</i> | 48  | 479  | 526  |
| LinJ35_V3.1520 | <i>L. infantum</i> | 48  | 479  | 526  |
| LinJ35_V3.1530 | <i>L. infantum</i> | 91  | 71   | 161  |

|                |                    |     |      |      |
|----------------|--------------------|-----|------|------|
| LinJ35_V3.1530 | <i>L. infantum</i> | 98  | 163  | 260  |
| LinJ35_V3.1530 | <i>L. infantum</i> | 46  | 318  | 363  |
| LinJ35_V3.1540 | <i>L. infantum</i> | 77  | 201  | 277  |
| LinJ35_V3.1550 | <i>L. infantum</i> | 165 | 39   | 203  |
| LinJ35_V3.1550 | <i>L. infantum</i> | 42  | 482  | 523  |
| LinJ35_V3.1550 | <i>L. infantum</i> | 42  | 482  | 523  |
| LinJ35_V3.1560 | <i>L. infantum</i> | 67  | 151  | 217  |
| LinJ35_V3.1560 | <i>L. infantum</i> | 50  | 341  | 390  |
| LinJ35_V3.1560 | <i>L. infantum</i> | 88  | 393  | 480  |
| LinJ35_V3.1560 | <i>L. infantum</i> | 90  | 827  | 916  |
| LinJ35_V3.1570 | <i>L. infantum</i> | 40  | 1    | 40   |
| LinJ35_V3.1580 | <i>L. infantum</i> | 122 | 327  | 448  |
| LinJ35_V3.1590 | <i>L. infantum</i> | 67  | 66   | 132  |
| LinJ35_V3.1600 | <i>L. infantum</i> | 43  | 372  | 414  |
| LinJ35_V3.1610 | <i>L. infantum</i> | 44  | 141  | 184  |
| LinJ35_V3.1610 | <i>L. infantum</i> | 46  | 490  | 535  |
| LinJ35_V3.1610 | <i>L. infantum</i> | 50  | 893  | 942  |
| LinJ35_V3.1620 | <i>L. infantum</i> | 89  | 246  | 334  |
| LinJ35_V3.1620 | <i>L. infantum</i> | 61  | 433  | 493  |
| LinJ35_V3.1620 | <i>L. infantum</i> | 41  | 860  | 900  |
| LinJ35_V3.1620 | <i>L. infantum</i> | 44  | 1050 | 1093 |
| LinJ35_V3.1620 | <i>L. infantum</i> | 81  | 1780 | 1860 |
| LinJ35_V3.1620 | <i>L. infantum</i> | 63  | 1889 | 1951 |
| LinJ35_V3.1630 | <i>L. infantum</i> | 327 | 152  | 478  |
| LinJ35_V3.1640 | <i>L. infantum</i> | 80  | 87   | 166  |
| LinJ35_V3.1640 | <i>L. infantum</i> | 60  | 174  | 233  |
| LinJ35_V3.1640 | <i>L. infantum</i> | 60  | 174  | 233  |
| LinJ35_V3.1650 | <i>L. infantum</i> | 69  | 32   | 100  |
| LinJ35_V3.1650 | <i>L. infantum</i> | 421 | 114  | 534  |
| LinJ35_V3.1650 | <i>L. infantum</i> | 100 | 540  | 639  |
| LinJ35_V3.1660 | <i>L. infantum</i> | 84  | 77   | 160  |
| LinJ35_V3.1660 | <i>L. infantum</i> | 248 | 388  | 635  |
| LinJ35_V3.1670 | <i>L. infantum</i> | 40  | 1    | 40   |
| LinJ35_V3.1670 | <i>L. infantum</i> | 41  | 103  | 143  |
| LinJ35_V3.1670 | <i>L. infantum</i> | 41  | 103  | 143  |
| LinJ35_V3.1680 | <i>L. infantum</i> | 75  | 204  | 278  |
| LinJ35_V3.1690 | <i>L. infantum</i> | 218 | 101  | 318  |
| LinJ35_V3.1710 | <i>L. infantum</i> | 89  | 31   | 119  |
| LinJ35_V3.1730 | <i>L. infantum</i> | 66  | 683  | 748  |
| LinJ35_V3.1760 | <i>L. infantum</i> | 73  | 99   | 171  |
| LinJ35_V3.1770 | <i>L. infantum</i> | 114 | 98   | 211  |
| LinJ35_V3.1790 | <i>L. infantum</i> | 58  | 208  | 265  |
| LinJ35_V3.1800 | <i>L. infantum</i> | 230 | 64   | 293  |
| LinJ35_V3.1800 | <i>L. infantum</i> | 47  | 371  | 417  |
| LinJ35_V3.1800 | <i>L. infantum</i> | 47  | 371  | 417  |
| LinJ35_V3.1810 | <i>L. infantum</i> | 124 | 1    | 124  |
| LinJ35_V3.1810 | <i>L. infantum</i> | 114 | 161  | 274  |

|                |                    |     |      |      |
|----------------|--------------------|-----|------|------|
| LinJ35_V3.1840 | <i>L. infantum</i> | 40  | 120  | 159  |
| LinJ35_V3.1850 | <i>L. infantum</i> | 184 | 1    | 184  |
| LinJ35_V3.1860 | <i>L. infantum</i> | 69  | 147  | 215  |
| LinJ35_V3.1860 | <i>L. infantum</i> | 91  | 220  | 310  |
| LinJ35_V3.1860 | <i>L. infantum</i> | 51  | 318  | 368  |
| LinJ35_V3.1860 | <i>L. infantum</i> | 41  | 414  | 454  |
| LinJ35_V3.1860 | <i>L. infantum</i> | 55  | 537  | 591  |
| LinJ35_V3.1860 | <i>L. infantum</i> | 49  | 617  | 665  |
| LinJ35_V3.1870 | <i>L. infantum</i> | 68  | 238  | 305  |
| LinJ35_V3.1880 | <i>L. infantum</i> | 68  | 238  | 305  |
| LinJ35_V3.1890 | <i>L. infantum</i> | 51  | 39   | 89   |
| LinJ35_V3.1890 | <i>L. infantum</i> | 47  | 158  | 204  |
| LinJ35_V3.1890 | <i>L. infantum</i> | 47  | 158  | 204  |
| LinJ35_V3.1910 | <i>L. infantum</i> | 51  | 30   | 80   |
| LinJ35_V3.1910 | <i>L. infantum</i> | 57  | 195  | 251  |
| LinJ35_V3.1910 | <i>L. infantum</i> | 57  | 195  | 251  |
| LinJ35_V3.1920 | <i>L. infantum</i> | 76  | 93   | 168  |
| LinJ35_V3.1920 | <i>L. infantum</i> | 78  | 223  | 300  |
| LinJ35_V3.1930 | <i>L. infantum</i> | 59  | 125  | 183  |
| LinJ35_V3.1930 | <i>L. infantum</i> | 392 | 228  | 619  |
| LinJ35_V3.1960 | <i>L. infantum</i> | 118 | 135  | 252  |
| LinJ35_V3.1970 | <i>L. infantum</i> | 50  | 358  | 407  |
| LinJ35_V3.1970 | <i>L. infantum</i> | 44  | 428  | 471  |
| LinJ35_V3.1970 | <i>L. infantum</i> | 104 | 487  | 590  |
| LinJ35_V3.1980 | <i>L. infantum</i> | 56  | 199  | 254  |
| LinJ35_V3.1980 | <i>L. infantum</i> | 49  | 391  | 439  |
| LinJ35_V3.1980 | <i>L. infantum</i> | 64  | 473  | 536  |
| LinJ35_V3.1980 | <i>L. infantum</i> | 50  | 539  | 588  |
| LinJ35_V3.1980 | <i>L. infantum</i> | 75  | 660  | 734  |
| LinJ35_V3.1980 | <i>L. infantum</i> | 69  | 766  | 834  |
| LinJ35_V3.1990 | <i>L. infantum</i> | 42  | 22   | 63   |
| LinJ35_V3.1990 | <i>L. infantum</i> | 67  | 379  | 445  |
| LinJ35_V3.1990 | <i>L. infantum</i> | 66  | 552  | 617  |
| LinJ35_V3.1990 | <i>L. infantum</i> | 50  | 790  | 839  |
| LinJ35_V3.2000 | <i>L. infantum</i> | 120 | 130  | 249  |
| LinJ35_V3.2020 | <i>L. infantum</i> | 108 | 136  | 243  |
| LinJ35_V3.2020 | <i>L. infantum</i> | 59  | 319  | 377  |
| LinJ35_V3.2020 | <i>L. infantum</i> | 60  | 422  | 481  |
| LinJ35_V3.2020 | <i>L. infantum</i> | 50  | 936  | 985  |
| LinJ35_V3.2020 | <i>L. infantum</i> | 48  | 1044 | 1091 |
| LinJ35_V3.2020 | <i>L. infantum</i> | 53  | 1140 | 1192 |
| LinJ35_V3.2020 | <i>L. infantum</i> | 86  | 1241 | 1326 |
| LinJ35_V3.2030 | <i>L. infantum</i> | 96  | 142  | 237  |
| LinJ35_V3.2030 | <i>L. infantum</i> | 90  | 621  | 710  |
| LinJ35_V3.2030 | <i>L. infantum</i> | 45  | 1011 | 1055 |
| LinJ35_V3.2030 | <i>L. infantum</i> | 66  | 1844 | 1909 |
| LinJ35_V3.2030 | <i>L. infantum</i> | 41  | 2456 | 2496 |

|                |                    |     |      |      |
|----------------|--------------------|-----|------|------|
| LinJ35_V3.2030 | <i>L. infantum</i> | 43  | 2689 | 2731 |
| LinJ35_V3.2030 | <i>L. infantum</i> | 75  | 3088 | 3162 |
| LinJ35_V3.2030 | <i>L. infantum</i> | 108 | 3667 | 3774 |
| LinJ35_V3.2040 | <i>L. infantum</i> | 65  | 1    | 65   |
| LinJ35_V3.2050 | <i>L. infantum</i> | 43  | 1    | 43   |
| LinJ35_V3.2050 | <i>L. infantum</i> | 44  | 220  | 263  |
| LinJ35_V3.2050 | <i>L. infantum</i> | 88  | 395  | 482  |
| LinJ35_V3.2060 | <i>L. infantum</i> | 237 | 93   | 329  |
| LinJ35_V3.2080 | <i>L. infantum</i> | 46  | 1    | 46   |
| LinJ35_V3.2080 | <i>L. infantum</i> | 75  | 1035 | 1109 |
| LinJ35_V3.2080 | <i>L. infantum</i> | 75  | 1035 | 1109 |
| LinJ35_V3.2090 | <i>L. infantum</i> | 77  | 218  | 294  |
| LinJ35_V3.2090 | <i>L. infantum</i> | 75  | 475  | 549  |
| LinJ35_V3.2090 | <i>L. infantum</i> | 75  | 475  | 549  |
| LinJ35_V3.2100 | <i>L. infantum</i> | 146 | 104  | 249  |
| LinJ35_V3.2100 | <i>L. infantum</i> | 105 | 385  | 489  |
| LinJ35_V3.2110 | <i>L. infantum</i> | 160 | 1    | 160  |
| LinJ35_V3.2110 | <i>L. infantum</i> | 207 | 279  | 485  |
| LinJ35_V3.2110 | <i>L. infantum</i> | 114 | 490  | 603  |
| LinJ35_V3.2130 | <i>L. infantum</i> | 113 | 1    | 113  |
| LinJ35_V3.2130 | <i>L. infantum</i> | 40  | 686  | 725  |
| LinJ35_V3.2130 | <i>L. infantum</i> | 40  | 686  | 725  |
| LinJ35_V3.2140 | <i>L. infantum</i> | 59  | 75   | 133  |
| LinJ35_V3.2160 | <i>L. infantum</i> | 241 | 1    | 241  |
| LinJ35_V3.2170 | <i>L. infantum</i> | 55  | 79   | 133  |
| LinJ35_V3.2170 | <i>L. infantum</i> | 64  | 351  | 414  |
| LinJ35_V3.2170 | <i>L. infantum</i> | 64  | 351  | 414  |
| LinJ35_V3.2180 | <i>L. infantum</i> | 56  | 32   | 87   |
| LinJ35_V3.2180 | <i>L. infantum</i> | 89  | 387  | 475  |
| LinJ35_V3.2180 | <i>L. infantum</i> | 89  | 387  | 475  |
| LinJ35_V3.2220 | <i>L. infantum</i> | 121 | 1    | 121  |
| LinJ35_V3.2220 | <i>L. infantum</i> | 55  | 290  | 344  |
| LinJ35_V3.2220 | <i>L. infantum</i> | 106 | 390  | 495  |
| LinJ35_V3.2220 | <i>L. infantum</i> | 84  | 622  | 705  |
| LinJ35_V3.2220 | <i>L. infantum</i> | 57  | 817  | 873  |
| LinJ35_V3.2220 | <i>L. infantum</i> | 59  | 1011 | 1069 |
| LinJ35_V3.2240 | <i>L. infantum</i> | 104 | 92   | 195  |
| LinJ35_V3.2290 | <i>L. infantum</i> | 51  | 30   | 80   |
| LinJ35_V3.2290 | <i>L. infantum</i> | 69  | 142  | 210  |
| LinJ35_V3.2290 | <i>L. infantum</i> | 42  | 276  | 317  |
| LinJ35_V3.2290 | <i>L. infantum</i> | 55  | 480  | 534  |
| LinJ35_V3.2300 | <i>L. infantum</i> | 86  | 55   | 140  |
| LinJ35_V3.2300 | <i>L. infantum</i> | 144 | 181  | 324  |
| LinJ35_V3.2300 | <i>L. infantum</i> | 42  | 356  | 397  |
| LinJ35_V3.2300 | <i>L. infantum</i> | 63  | 452  | 514  |
| LinJ35_V3.2300 | <i>L. infantum</i> | 48  | 547  | 594  |
| LinJ35_V3.2300 | <i>L. infantum</i> | 47  | 793  | 839  |

|                |                    |     |      |      |
|----------------|--------------------|-----|------|------|
| LinJ35_V3.2300 | <i>L. infantum</i> | 156 | 886  | 1041 |
| LinJ35_V3.2300 | <i>L. infantum</i> | 136 | 1202 | 1337 |
| LinJ35_V3.2300 | <i>L. infantum</i> | 55  | 1435 | 1489 |
| LinJ35_V3.2300 | <i>L. infantum</i> | 49  | 1505 | 1553 |
| LinJ35_V3.2300 | <i>L. infantum</i> | 44  | 1747 | 1790 |
| LinJ35_V3.2300 | <i>L. infantum</i> | 67  | 1845 | 1911 |
| LinJ35_V3.2300 | <i>L. infantum</i> | 85  | 1997 | 2081 |
| LinJ35_V3.2300 | <i>L. infantum</i> | 188 | 2114 | 2301 |
| LinJ35_V3.2300 | <i>L. infantum</i> | 101 | 2392 | 2492 |
| LinJ35_V3.2300 | <i>L. infantum</i> | 150 | 2542 | 2691 |
| LinJ35_V3.2310 | <i>L. infantum</i> | 45  | 125  | 169  |
| LinJ35_V3.2320 | <i>L. infantum</i> | 498 | 1    | 498  |
| LinJ35_V3.2320 | <i>L. infantum</i> | 62  | 965  | 1026 |
| LinJ35_V3.2320 | <i>L. infantum</i> | 65  | 1445 | 1509 |
| LinJ35_V3.2330 | <i>L. infantum</i> | 62  | 1    | 62   |
| LinJ35_V3.2340 | <i>L. infantum</i> | 54  | 111  | 164  |
| LinJ35_V3.2340 | <i>L. infantum</i> | 80  | 220  | 299  |
| LinJ35_V3.2340 | <i>L. infantum</i> | 62  | 389  | 450  |
| LinJ35_V3.2340 | <i>L. infantum</i> | 43  | 555  | 597  |
| LinJ35_V3.2340 | <i>L. infantum</i> | 43  | 686  | 728  |
| LinJ35_V3.2340 | <i>L. infantum</i> | 149 | 845  | 993  |
| LinJ35_V3.2340 | <i>L. infantum</i> | 82  | 1027 | 1108 |
| LinJ35_V3.2340 | <i>L. infantum</i> | 50  | 1161 | 1210 |
| LinJ35_V3.2340 | <i>L. infantum</i> | 130 | 1225 | 1354 |
| LinJ35_V3.2350 | <i>L. infantum</i> | 111 | 1    | 111  |
| LinJ35_V3.2350 | <i>L. infantum</i> | 49  | 358  | 406  |
| LinJ35_V3.2360 | <i>L. infantum</i> | 73  | 1    | 73   |
| LinJ35_V3.2360 | <i>L. infantum</i> | 77  | 106  | 182  |
| LinJ35_V3.2360 | <i>L. infantum</i> | 77  | 106  | 182  |
| LinJ35_V3.2370 | <i>L. infantum</i> | 115 | 1    | 115  |
| LinJ35_V3.2370 | <i>L. infantum</i> | 52  | 168  | 219  |
| LinJ35_V3.2370 | <i>L. infantum</i> | 45  | 455  | 499  |
| LinJ35_V3.2370 | <i>L. infantum</i> | 64  | 609  | 672  |
| LinJ35_V3.2370 | <i>L. infantum</i> | 325 | 776  | 1100 |
| LinJ35_V3.2410 | <i>L. infantum</i> | 131 | 1    | 131  |
| LinJ35_V3.2420 | <i>L. infantum</i> | 90  | 176  | 265  |
| LinJ35_V3.2420 | <i>L. infantum</i> | 60  | 311  | 370  |
| LinJ35_V3.2420 | <i>L. infantum</i> | 112 | 416  | 527  |
| LinJ35_V3.2420 | <i>L. infantum</i> | 46  | 532  | 577  |
| LinJ35_V3.2430 | <i>L. infantum</i> | 65  | 64   | 128  |
| LinJ35_V3.2430 | <i>L. infantum</i> | 63  | 390  | 452  |
| LinJ35_V3.2430 | <i>L. infantum</i> | 55  | 723  | 777  |
| LinJ35_V3.2430 | <i>L. infantum</i> | 293 | 984  | 1276 |
| LinJ35_V3.2440 | <i>L. infantum</i> | 56  | 97   | 152  |
| LinJ35_V3.2450 | <i>L. infantum</i> | 46  | 173  | 218  |
| LinJ35_V3.2450 | <i>L. infantum</i> | 40  | 349  | 388  |
| LinJ35_V3.2450 | <i>L. infantum</i> | 53  | 553  | 605  |

|                |                    |     |      |      |
|----------------|--------------------|-----|------|------|
| LinJ35_V3.2450 | <i>L. infantum</i> | 50  | 787  | 836  |
| LinJ35_V3.2460 | <i>L. infantum</i> | 66  | 1    | 66   |
| LinJ35_V3.2470 | <i>L. infantum</i> | 51  | 146  | 196  |
| LinJ35_V3.2470 | <i>L. infantum</i> | 48  | 320  | 367  |
| LinJ35_V3.2470 | <i>L. infantum</i> | 48  | 320  | 367  |
| LinJ35_V3.2480 | <i>L. infantum</i> | 67  | 1    | 67   |
| LinJ35_V3.2480 | <i>L. infantum</i> | 61  | 89   | 149  |
| LinJ35_V3.2480 | <i>L. infantum</i> | 274 | 199  | 472  |
| LinJ35_V3.2500 | <i>L. infantum</i> | 56  | 185  | 240  |
| LinJ35_V3.2500 | <i>L. infantum</i> | 59  | 541  | 599  |
| LinJ35_V3.2500 | <i>L. infantum</i> | 70  | 1019 | 1088 |
| LinJ35_V3.2500 | <i>L. infantum</i> | 50  | 1391 | 1440 |
| LinJ35_V3.2500 | <i>L. infantum</i> | 127 | 1687 | 1813 |
| LinJ35_V3.2500 | <i>L. infantum</i> | 45  | 1839 | 1883 |
| LinJ35_V3.2500 | <i>L. infantum</i> | 87  | 2178 | 2264 |
| LinJ35_V3.2510 | <i>L. infantum</i> | 189 | 1    | 189  |
| LinJ35_V3.2510 | <i>L. infantum</i> | 90  | 302  | 391  |
| LinJ35_V3.2520 | <i>L. infantum</i> | 251 | 1    | 251  |
| LinJ35_V3.2520 | <i>L. infantum</i> | 49  | 290  | 338  |
| LinJ35_V3.2530 | <i>L. infantum</i> | 118 | 14   | 131  |
| LinJ35_V3.2530 | <i>L. infantum</i> | 276 | 842  | 1117 |
| LinJ35_V3.2530 | <i>L. infantum</i> | 42  | 1143 | 1184 |
| LinJ35_V3.2530 | <i>L. infantum</i> | 320 | 1195 | 1514 |
| LinJ35_V3.2530 | <i>L. infantum</i> | 123 | 1529 | 1651 |
| LinJ35_V3.2540 | <i>L. infantum</i> | 65  | 184  | 248  |
| LinJ35_V3.2560 | <i>L. infantum</i> | 99  | 219  | 317  |
| LinJ35_V3.2570 | <i>L. infantum</i> | 150 | 1    | 150  |
| LinJ35_V3.2570 | <i>L. infantum</i> | 45  | 294  | 338  |
| LinJ35_V3.2590 | <i>L. infantum</i> | 111 | 87   | 197  |
| LinJ35_V3.2600 | <i>L. infantum</i> | 44  | 33   | 76   |
| LinJ35_V3.2600 | <i>L. infantum</i> | 127 | 291  | 417  |
| LinJ35_V3.2610 | <i>L. infantum</i> | 149 | 70   | 218  |
| LinJ35_V3.2620 | <i>L. infantum</i> | 89  | 1    | 89   |
| LinJ35_V3.2620 | <i>L. infantum</i> | 69  | 122  | 190  |
| LinJ35_V3.2650 | <i>L. infantum</i> | 195 | 24   | 218  |
| LinJ35_V3.2660 | <i>L. infantum</i> | 54  | 1    | 54   |
| LinJ35_V3.2660 | <i>L. infantum</i> | 101 | 166  | 266  |
| LinJ35_V3.2660 | <i>L. infantum</i> | 130 | 272  | 401  |
| LinJ35_V3.2670 | <i>L. infantum</i> | 86  | 89   | 174  |
| LinJ35_V3.2670 | <i>L. infantum</i> | 162 | 383  | 544  |
| LinJ35_V3.2670 | <i>L. infantum</i> | 49  | 546  | 594  |
| LinJ35_V3.2690 | <i>L. infantum</i> | 41  | 1    | 41   |
| LinJ35_V3.2700 | <i>L. infantum</i> | 90  | 73   | 162  |
| LinJ35_V3.2700 | <i>L. infantum</i> | 399 | 193  | 591  |
| LinJ35_V3.2700 | <i>L. infantum</i> | 44  | 603  | 646  |
| LinJ35_V3.2730 | <i>L. infantum</i> | 138 | 1    | 138  |
| LinJ35_V3.2740 | <i>L. infantum</i> | 70  | 469  | 538  |

|                |                    |     |      |      |
|----------------|--------------------|-----|------|------|
| LinJ35_V3.2740 | <i>L. infantum</i> | 46  | 1060 | 1105 |
| LinJ35_V3.2740 | <i>L. infantum</i> | 92  | 1146 | 1237 |
| LinJ35_V3.2750 | <i>L. infantum</i> | 58  | 38   | 95   |
| LinJ35_V3.2750 | <i>L. infantum</i> | 81  | 166  | 246  |
| LinJ35_V3.2760 | <i>L. infantum</i> | 59  | 51   | 109  |
| LinJ35_V3.2760 | <i>L. infantum</i> | 66  | 149  | 214  |
| LinJ35_V3.2760 | <i>L. infantum</i> | 66  | 149  | 214  |
| LinJ35_V3.2770 | <i>L. infantum</i> | 109 | 96   | 204  |
| LinJ35_V3.2770 | <i>L. infantum</i> | 43  | 235  | 277  |
| LinJ35_V3.2770 | <i>L. infantum</i> | 57  | 465  | 521  |
| LinJ35_V3.2770 | <i>L. infantum</i> | 83  | 688  | 770  |
| LinJ35_V3.2800 | <i>L. infantum</i> | 149 | 46   | 194  |
| LinJ35_V3.2800 | <i>L. infantum</i> | 78  | 196  | 273  |
| LinJ35_V3.2810 | <i>L. infantum</i> | 43  | 1    | 43   |
| LinJ35_V3.2810 | <i>L. infantum</i> | 130 | 274  | 403  |
| LinJ35_V3.2810 | <i>L. infantum</i> | 63  | 558  | 620  |
| LinJ35_V3.2830 | <i>L. infantum</i> | 53  | 525  | 577  |
| LinJ35_V3.2830 | <i>L. infantum</i> | 91  | 608  | 698  |
| LinJ35_V3.2840 | <i>L. infantum</i> | 83  | 317  | 399  |
| LinJ35_V3.2860 | <i>L. infantum</i> | 40  | 267  | 306  |
| LinJ35_V3.2860 | <i>L. infantum</i> | 62  | 396  | 457  |
| LinJ35_V3.2860 | <i>L. infantum</i> | 62  | 396  | 457  |
| LinJ35_V3.2870 | <i>L. infantum</i> | 203 | 229  | 431  |
| LinJ35_V3.2880 | <i>L. infantum</i> | 46  | 123  | 168  |
| LinJ35_V3.2880 | <i>L. infantum</i> | 41  | 345  | 385  |
| LinJ35_V3.2880 | <i>L. infantum</i> | 79  | 442  | 520  |
| LinJ35_V3.2890 | <i>L. infantum</i> | 40  | 134  | 173  |
| LinJ35_V3.2900 | <i>L. infantum</i> | 207 | 275  | 481  |
| LinJ35_V3.2910 | <i>L. infantum</i> | 78  | 1    | 78   |
| LinJ35_V3.2910 | <i>L. infantum</i> | 54  | 98   | 151  |
| LinJ35_V3.2920 | <i>L. infantum</i> | 52  | 121  | 172  |
| LinJ35_V3.2920 | <i>L. infantum</i> | 52  | 275  | 326  |
| LinJ35_V3.2920 | <i>L. infantum</i> | 98  | 377  | 474  |
| LinJ35_V3.2920 | <i>L. infantum</i> | 52  | 505  | 556  |
| LinJ35_V3.2920 | <i>L. infantum</i> | 64  | 656  | 719  |
| LinJ35_V3.2940 | <i>L. infantum</i> | 64  | 37   | 100  |
| LinJ35_V3.2940 | <i>L. infantum</i> | 68  | 321  | 388  |
| LinJ35_V3.2940 | <i>L. infantum</i> | 107 | 501  | 607  |
| LinJ35_V3.2960 | <i>L. infantum</i> | 65  | 1    | 65   |
| LinJ35_V3.2970 | <i>L. infantum</i> | 73  | 46   | 118  |
| LinJ35_V3.2970 | <i>L. infantum</i> | 56  | 180  | 235  |
| LinJ35_V3.2970 | <i>L. infantum</i> | 74  | 274  | 347  |
| LinJ35_V3.2970 | <i>L. infantum</i> | 155 | 497  | 651  |
| LinJ35_V3.2970 | <i>L. infantum</i> | 59  | 763  | 821  |
| LinJ35_V3.2990 | <i>L. infantum</i> | 77  | 1    | 77   |
| LinJ35_V3.3000 | <i>L. infantum</i> | 111 | 1    | 111  |
| LinJ35_V3.3000 | <i>L. infantum</i> | 41  | 293  | 333  |



|                |                    |     |      |      |
|----------------|--------------------|-----|------|------|
| LinJ35_V3.3000 | <i>L. infantum</i> | 67  | 1030 | 1096 |
| LinJ35_V3.3010 | <i>L. infantum</i> | 45  | 515  | 559  |
| LinJ35_V3.3020 | <i>L. infantum</i> | 88  | 145  | 232  |
| LinJ35_V3.3020 | <i>L. infantum</i> | 49  | 333  | 381  |
| LinJ35_V3.3030 | <i>L. infantum</i> | 48  | 1    | 48   |
| LinJ35_V3.3030 | <i>L. infantum</i> | 205 | 61   | 265  |
| LinJ35_V3.3030 | <i>L. infantum</i> | 86  | 393  | 478  |
| LinJ35_V3.3040 | <i>L. infantum</i> | 50  | 19   | 68   |
| LinJ35_V3.3040 | <i>L. infantum</i> | 64  | 349  | 412  |
| LinJ35_V3.3050 | <i>L. infantum</i> | 46  | 50   | 95   |
| LinJ35_V3.3100 | <i>L. infantum</i> | 118 | 77   | 194  |
| LinJ35_V3.3100 | <i>L. infantum</i> | 47  | 276  | 322  |
| LinJ35_V3.3100 | <i>L. infantum</i> | 58  | 350  | 407  |
| LinJ35_V3.3110 | <i>L. infantum</i> | 68  | 335  | 402  |
| LinJ35_V3.3120 | <i>L. infantum</i> | 50  | 1    | 50   |
| LinJ35_V3.3140 | <i>L. infantum</i> | 73  | 70   | 142  |
| LinJ35_V3.3140 | <i>L. infantum</i> | 98  | 184  | 281  |
| LinJ35_V3.3140 | <i>L. infantum</i> | 98  | 184  | 281  |
| LinJ35_V3.3150 | <i>L. infantum</i> | 435 | 1    | 435  |
| LinJ35_V3.3150 | <i>L. infantum</i> | 69  | 856  | 924  |
| LinJ35_V3.3160 | <i>L. infantum</i> | 41  | 159  | 199  |
| LinJ35_V3.3170 | <i>L. infantum</i> | 80  | 32   | 111  |
| LinJ35_V3.3170 | <i>L. infantum</i> | 43  | 395  | 437  |
| LinJ35_V3.3170 | <i>L. infantum</i> | 88  | 833  | 920  |
| LinJ35_V3.3170 | <i>L. infantum</i> | 292 | 1072 | 1363 |
| LinJ35_V3.3170 | <i>L. infantum</i> | 68  | 1379 | 1446 |
| LinJ35_V3.3170 | <i>L. infantum</i> | 108 | 1485 | 1592 |
| LinJ35_V3.3180 | <i>L. infantum</i> | 58  | 1    | 58   |
| LinJ35_V3.3200 | <i>L. infantum</i> | 66  | 36   | 101  |
| LinJ35_V3.3200 | <i>L. infantum</i> | 72  | 131  | 202  |
| LinJ35_V3.3200 | <i>L. infantum</i> | 103 | 335  | 437  |
| LinJ35_V3.3200 | <i>L. infantum</i> | 49  | 441  | 489  |
| LinJ35_V3.3220 | <i>L. infantum</i> | 45  | 1    | 45   |
| LinJ35_V3.3220 | <i>L. infantum</i> | 538 | 63   | 600  |
| LinJ35_V3.3220 | <i>L. infantum</i> | 89  | 786  | 874  |
| LinJ35_V3.3220 | <i>L. infantum</i> | 195 | 1145 | 1339 |
| LinJ35_V3.3220 | <i>L. infantum</i> | 241 | 1355 | 1595 |
| LinJ35_V3.3230 | <i>L. infantum</i> | 42  | 1    | 42   |
| LinJ35_V3.3230 | <i>L. infantum</i> | 58  | 135  | 192  |
| LinJ35_V3.3230 | <i>L. infantum</i> | 58  | 135  | 192  |
| LinJ35_V3.3240 | <i>L. infantum</i> | 60  | 161  | 220  |
| LinJ35_V3.3240 | <i>L. infantum</i> | 302 | 298  | 599  |
| LinJ35_V3.3250 | <i>L. infantum</i> | 54  | 120  | 173  |
| LinJ35_V3.3250 | <i>L. infantum</i> | 209 | 383  | 591  |
| LinJ35_V3.3250 | <i>L. infantum</i> | 104 | 601  | 704  |
| LinJ35_V3.3260 | <i>L. infantum</i> | 221 | 35   | 255  |
| LinJ35_V3.3270 | <i>L. infantum</i> | 44  | 1    | 44   |

|                |                    |     |      |      |
|----------------|--------------------|-----|------|------|
| LinJ35_V3.3290 | <i>L. infantum</i> | 114 | 1    | 114  |
| LinJ35_V3.3290 | <i>L. infantum</i> | 494 | 179  | 672  |
| LinJ35_V3.3290 | <i>L. infantum</i> | 112 | 689  | 800  |
| LinJ35_V3.3310 | <i>L. infantum</i> | 209 | 1    | 209  |
| LinJ35_V3.3320 | <i>L. infantum</i> | 168 | 21   | 188  |
| LinJ35_V3.3340 | <i>L. infantum</i> | 99  | 1    | 99   |
| LinJ35_V3.3350 | <i>L. infantum</i> | 55  | 455  | 509  |
| LinJ35_V3.3350 | <i>L. infantum</i> | 44  | 560  | 603  |
| LinJ35_V3.3350 | <i>L. infantum</i> | 44  | 560  | 603  |
| LinJ35_V3.3360 | <i>L. infantum</i> | 137 | 141  | 277  |
| LinJ35_V3.3380 | <i>L. infantum</i> | 40  | 323  | 362  |
| LinJ35_V3.3400 | <i>L. infantum</i> | 53  | 10   | 62   |
| LinJ35_V3.3400 | <i>L. infantum</i> | 108 | 355  | 462  |
| LinJ35_V3.3410 | <i>L. infantum</i> | 53  | 1    | 53   |
| LinJ35_V3.3410 | <i>L. infantum</i> | 50  | 997  | 1046 |
| LinJ35_V3.3410 | <i>L. infantum</i> | 42  | 1220 | 1261 |
| LinJ35_V3.3410 | <i>L. infantum</i> | 44  | 1718 | 1761 |
| LinJ35_V3.3410 | <i>L. infantum</i> | 57  | 2017 | 2073 |
| LinJ35_V3.3420 | <i>L. infantum</i> | 129 | 1    | 129  |
| LinJ35_V3.3420 | <i>L. infantum</i> | 57  | 1012 | 1068 |
| LinJ35_V3.3430 | <i>L. infantum</i> | 66  | 442  | 507  |
| LinJ35_V3.3440 | <i>L. infantum</i> | 42  | 144  | 185  |
| LinJ35_V3.3460 | <i>L. infantum</i> | 79  | 61   | 139  |
| LinJ35_V3.3460 | <i>L. infantum</i> | 44  | 175  | 218  |
| LinJ35_V3.3460 | <i>L. infantum</i> | 55  | 275  | 329  |
| LinJ35_V3.3460 | <i>L. infantum</i> | 42  | 446  | 487  |
| LinJ35_V3.3460 | <i>L. infantum</i> | 40  | 679  | 718  |
| LinJ35_V3.3470 | <i>L. infantum</i> | 112 | 1    | 112  |
| LinJ35_V3.3480 | <i>L. infantum</i> | 57  | 162  | 218  |
| LinJ35_V3.3480 | <i>L. infantum</i> | 43  | 220  | 262  |
| LinJ35_V3.3480 | <i>L. infantum</i> | 58  | 391  | 448  |
| LinJ35_V3.3480 | <i>L. infantum</i> | 64  | 487  | 550  |
| LinJ35_V3.3500 | <i>L. infantum</i> | 147 | 1    | 147  |
| LinJ35_V3.3500 | <i>L. infantum</i> | 98  | 378  | 475  |
| LinJ35_V3.3510 | <i>L. infantum</i> | 104 | 205  | 308  |
| LinJ35_V3.3530 | <i>L. infantum</i> | 98  | 139  | 236  |
| LinJ35_V3.3530 | <i>L. infantum</i> | 311 | 419  | 729  |
| LinJ35_V3.3540 | <i>L. infantum</i> | 241 | 186  | 426  |
| LinJ35_V3.3550 | <i>L. infantum</i> | 104 | 1    | 104  |
| LinJ35_V3.3550 | <i>L. infantum</i> | 45  | 132  | 176  |
| LinJ35_V3.3560 | <i>L. infantum</i> | 68  | 74   | 141  |
| LinJ35_V3.3560 | <i>L. infantum</i> | 357 | 192  | 548  |
| LinJ35_V3.3560 | <i>L. infantum</i> | 40  | 702  | 741  |
| LinJ35_V3.3560 | <i>L. infantum</i> | 50  | 744  | 793  |
| LinJ35_V3.3560 | <i>L. infantum</i> | 91  | 864  | 954  |
| LinJ35_V3.3560 | <i>L. infantum</i> | 183 | 983  | 1165 |
| LinJ35_V3.3570 | <i>L. infantum</i> | 214 | 25   | 238  |

|                |                    |     |      |      |
|----------------|--------------------|-----|------|------|
| LinJ35_V3.3580 | <i>L. infantum</i> | 46  | 95   | 140  |
| LinJ35_V3.3600 | <i>L. infantum</i> | 341 | 1    | 341  |
| LinJ35_V3.3600 | <i>L. infantum</i> | 369 | 382  | 750  |
| LinJ35_V3.3610 | <i>L. infantum</i> | 60  | 313  | 372  |
| LinJ35_V3.3620 | <i>L. infantum</i> | 50  | 510  | 559  |
| LinJ35_V3.3620 | <i>L. infantum</i> | 91  | 701  | 791  |
| LinJ35_V3.3620 | <i>L. infantum</i> | 91  | 701  | 791  |
| LinJ35_V3.3640 | <i>L. infantum</i> | 167 | 77   | 243  |
| LinJ35_V3.3640 | <i>L. infantum</i> | 330 | 298  | 627  |
| LinJ35_V3.3640 | <i>L. infantum</i> | 59  | 872  | 930  |
| LinJ35_V3.3650 | <i>L. infantum</i> | 58  | 1    | 58   |
| LinJ35_V3.3680 | <i>L. infantum</i> | 41  | 26   | 66   |
| LinJ35_V3.3680 | <i>L. infantum</i> | 58  | 563  | 620  |
| LinJ35_V3.3680 | <i>L. infantum</i> | 58  | 563  | 620  |
| LinJ35_V3.3690 | <i>L. infantum</i> | 64  | 21   | 84   |
| LinJ35_V3.3690 | <i>L. infantum</i> | 88  | 117  | 204  |
| LinJ35_V3.3700 | <i>L. infantum</i> | 390 | 1    | 390  |
| LinJ35_V3.3700 | <i>L. infantum</i> | 59  | 422  | 480  |
| LinJ35_V3.3710 | <i>L. infantum</i> | 50  | 1    | 50   |
| LinJ35_V3.3710 | <i>L. infantum</i> | 56  | 129  | 184  |
| LinJ35_V3.3710 | <i>L. infantum</i> | 49  | 705  | 753  |
| LinJ35_V3.3710 | <i>L. infantum</i> | 42  | 813  | 854  |
| LinJ35_V3.3710 | <i>L. infantum</i> | 48  | 859  | 906  |
| LinJ35_V3.3710 | <i>L. infantum</i> | 41  | 1015 | 1055 |
| LinJ35_V3.3710 | <i>L. infantum</i> | 48  | 1250 | 1297 |
| LinJ35_V3.3760 | <i>L. infantum</i> | 119 | 1    | 119  |
| LinJ35_V3.3770 | <i>L. infantum</i> | 113 | 1    | 113  |
| LinJ35_V3.3770 | <i>L. infantum</i> | 148 | 175  | 322  |
| LinJ35_V3.3770 | <i>L. infantum</i> | 88  | 353  | 440  |
| LinJ35_V3.3780 | <i>L. infantum</i> | 44  | 44   | 87   |
| LinJ35_V3.3780 | <i>L. infantum</i> | 51  | 160  | 210  |
| LinJ35_V3.3780 | <i>L. infantum</i> | 41  | 423  | 463  |
| LinJ35_V3.3800 | <i>L. infantum</i> | 58  | 175  | 232  |
| LinJ35_V3.3800 | <i>L. infantum</i> | 65  | 277  | 341  |
| LinJ35_V3.3800 | <i>L. infantum</i> | 48  | 473  | 520  |
| LinJ35_V3.3800 | <i>L. infantum</i> | 112 | 544  | 655  |
| LinJ35_V3.3800 | <i>L. infantum</i> | 54  | 780  | 833  |
| LinJ35_V3.3810 | <i>L. infantum</i> | 47  | 1    | 47   |
| LinJ35_V3.3820 | <i>L. infantum</i> | 47  | 118  | 164  |
| LinJ35_V3.3820 | <i>L. infantum</i> | 69  | 236  | 304  |
| LinJ35_V3.3820 | <i>L. infantum</i> | 69  | 236  | 304  |
| LinJ35_V3.3830 | <i>L. infantum</i> | 47  | 1    | 47   |
| LinJ35_V3.3860 | <i>L. infantum</i> | 61  | 1    | 61   |
| LinJ35_V3.3860 | <i>L. infantum</i> | 61  | 73   | 133  |
| LinJ35_V3.3860 | <i>L. infantum</i> | 103 | 168  | 270  |
| LinJ35_V3.3890 | <i>L. infantum</i> | 88  | 225  | 312  |
| LinJ35_V3.3900 | <i>L. infantum</i> | 49  | 522  | 570  |

|                |                    |     |      |      |
|----------------|--------------------|-----|------|------|
| LinJ35_V3.3910 | <i>L. infantum</i> | 40  | 152  | 191  |
| LinJ35_V3.3920 | <i>L. infantum</i> | 84  | 361  | 444  |
| LinJ35_V3.3940 | <i>L. infantum</i> | 72  | 1    | 72   |
| LinJ35_V3.3970 | <i>L. infantum</i> | 62  | 1    | 62   |
| LinJ35_V3.3970 | <i>L. infantum</i> | 96  | 109  | 204  |
| LinJ35_V3.3970 | <i>L. infantum</i> | 223 | 208  | 430  |
| LinJ35_V3.3990 | <i>L. infantum</i> | 77  | 1    | 77   |
| LinJ35_V3.4000 | <i>L. infantum</i> | 41  | 1    | 41   |
| LinJ35_V3.4000 | <i>L. infantum</i> | 69  | 474  | 542  |
| LinJ35_V3.4000 | <i>L. infantum</i> | 41  | 823  | 863  |
| LinJ35_V3.4000 | <i>L. infantum</i> | 53  | 1884 | 1936 |
| LinJ35_V3.4000 | <i>L. infantum</i> | 45  | 2076 | 2120 |
| LinJ35_V3.4010 | <i>L. infantum</i> | 71  | 1    | 71   |
| LinJ35_V3.4020 | <i>L. infantum</i> | 215 | 87   | 301  |
| LinJ35_V3.4020 | <i>L. infantum</i> | 121 | 586  | 706  |
| LinJ35_V3.4030 | <i>L. infantum</i> | 762 | 30   | 791  |
| LinJ35_V3.4050 | <i>L. infantum</i> | 71  | 143  | 213  |
| LinJ35_V3.4050 | <i>L. infantum</i> | 71  | 229  | 299  |
| LinJ35_V3.4050 | <i>L. infantum</i> | 107 | 328  | 434  |
| LinJ35_V3.4050 | <i>L. infantum</i> | 114 | 466  | 579  |
| LinJ35_V3.4060 | <i>L. infantum</i> | 57  | 1    | 57   |
| LinJ35_V3.4070 | <i>L. infantum</i> | 65  | 86   | 150  |
| LinJ35_V3.4080 | <i>L. infantum</i> | 55  | 196  | 250  |
| LinJ35_V3.4080 | <i>L. infantum</i> | 78  | 409  | 486  |
| LinJ35_V3.4080 | <i>L. infantum</i> | 118 | 573  | 690  |
| LinJ35_V3.4090 | <i>L. infantum</i> | 45  | 35   | 79   |
| LinJ35_V3.4090 | <i>L. infantum</i> | 254 | 113  | 366  |
| LinJ35_V3.4110 | <i>L. infantum</i> | 48  | 237  | 284  |
| LinJ35_V3.4110 | <i>L. infantum</i> | 72  | 365  | 436  |
| LinJ35_V3.4110 | <i>L. infantum</i> | 293 | 445  | 737  |
| LinJ35_V3.4110 | <i>L. infantum</i> | 175 | 891  | 1065 |
| LinJ35_V3.4130 | <i>L. infantum</i> | 53  | 150  | 202  |
| LinJ35_V3.4130 | <i>L. infantum</i> | 50  | 289  | 338  |
| LinJ35_V3.4130 | <i>L. infantum</i> | 50  | 289  | 338  |
| LinJ35_V3.4140 | <i>L. infantum</i> | 89  | 43   | 131  |
| LinJ35_V3.4140 | <i>L. infantum</i> | 130 | 147  | 276  |
| LinJ35_V3.4140 | <i>L. infantum</i> | 282 | 291  | 572  |
| LinJ35_V3.4140 | <i>L. infantum</i> | 394 | 676  | 1069 |
| LinJ35_V3.4160 | <i>L. infantum</i> | 52  | 1    | 52   |
| LinJ35_V3.4160 | <i>L. infantum</i> | 57  | 210  | 266  |
| LinJ35_V3.4160 | <i>L. infantum</i> | 57  | 210  | 266  |
| LinJ35_V3.4170 | <i>L. infantum</i> | 82  | 55   | 136  |
| LinJ35_V3.4180 | <i>L. infantum</i> | 88  | 78   | 165  |
| LinJ35_V3.4180 | <i>L. infantum</i> | 67  | 210  | 276  |
| LinJ35_V3.4180 | <i>L. infantum</i> | 121 | 410  | 530  |
| LinJ35_V3.4180 | <i>L. infantum</i> | 146 | 579  | 724  |
| LinJ35_V3.4180 | <i>L. infantum</i> | 63  | 756  | 818  |

|                |                    |     |      |      |
|----------------|--------------------|-----|------|------|
| LinJ35_V3.4190 | <i>L. infantum</i> | 585 | 1    | 585  |
| LinJ35_V3.4200 | <i>L. infantum</i> | 66  | 237  | 302  |
| LinJ35_V3.4200 | <i>L. infantum</i> | 160 | 365  | 524  |
| LinJ35_V3.4210 | <i>L. infantum</i> | 58  | 235  | 292  |
| LinJ35_V3.4220 | <i>L. infantum</i> | 84  | 1    | 84   |
| LinJ35_V3.4220 | <i>L. infantum</i> | 102 | 130  | 231  |
| LinJ35_V3.4240 | <i>L. infantum</i> | 197 | 1    | 197  |
| LinJ35_V3.4240 | <i>L. infantum</i> | 42  | 199  | 240  |
| LinJ35_V3.4250 | <i>L. infantum</i> | 40  | 397  | 436  |
| LinJ35_V3.4260 | <i>L. infantum</i> | 99  | 1    | 99   |
| LinJ35_V3.4270 | <i>L. infantum</i> | 41  | 430  | 470  |
| LinJ35_V3.4280 | <i>L. infantum</i> | 521 | 57   | 577  |
| LinJ35_V3.4280 | <i>L. infantum</i> | 113 | 630  | 742  |
| LinJ35_V3.4290 | <i>L. infantum</i> | 42  | 17   | 58   |
| LinJ35_V3.4290 | <i>L. infantum</i> | 338 | 66   | 403  |
| LinJ35_V3.4290 | <i>L. infantum</i> | 171 | 430  | 600  |
| LinJ35_V3.4300 | <i>L. infantum</i> | 78  | 145  | 222  |
| LinJ35_V3.4300 | <i>L. infantum</i> | 53  | 306  | 358  |
| LinJ35_V3.4300 | <i>L. infantum</i> | 53  | 623  | 675  |
| LinJ35_V3.4300 | <i>L. infantum</i> | 54  | 720  | 773  |
| LinJ35_V3.4310 | <i>L. infantum</i> | 41  | 140  | 180  |
| LinJ35_V3.4320 | <i>L. infantum</i> | 46  | 276  | 321  |
| LinJ35_V3.4330 | <i>L. infantum</i> | 46  | 1    | 46   |
| LinJ35_V3.4330 | <i>L. infantum</i> | 213 | 65   | 277  |
| LinJ35_V3.4330 | <i>L. infantum</i> | 44  | 288  | 331  |
| LinJ35_V3.4340 | <i>L. infantum</i> | 72  | 98   | 169  |
| LinJ35_V3.4350 | <i>L. infantum</i> | 156 | 1    | 156  |
| LinJ35_V3.4350 | <i>L. infantum</i> | 229 | 287  | 515  |
| LinJ35_V3.4350 | <i>L. infantum</i> | 65  | 534  | 598  |
| LinJ35_V3.4350 | <i>L. infantum</i> | 138 | 664  | 801  |
| LinJ35_V3.4360 | <i>L. infantum</i> | 67  | 69   | 135  |
| LinJ35_V3.4360 | <i>L. infantum</i> | 148 | 146  | 293  |
| LinJ35_V3.4370 | <i>L. infantum</i> | 54  | 25   | 78   |
| LinJ35_V3.4370 | <i>L. infantum</i> | 45  | 188  | 232  |
| LinJ35_V3.4390 | <i>L. infantum</i> | 56  | 37   | 92   |
| LinJ35_V3.4390 | <i>L. infantum</i> | 59  | 124  | 182  |
| LinJ35_V3.4400 | <i>L. infantum</i> | 62  | 19   | 80   |
| LinJ35_V3.4400 | <i>L. infantum</i> | 91  | 209  | 299  |
| LinJ35_V3.4400 | <i>L. infantum</i> | 40  | 359  | 398  |
| LinJ35_V3.4400 | <i>L. infantum</i> | 123 | 417  | 539  |
| LinJ35_V3.4400 | <i>L. infantum</i> | 71  | 544  | 614  |
| LinJ35_V3.4420 | <i>L. infantum</i> | 55  | 232  | 286  |
| LinJ35_V3.4430 | <i>L. infantum</i> | 106 | 594  | 699  |
| LinJ35_V3.4430 | <i>L. infantum</i> | 135 | 1153 | 1287 |
| LinJ35_V3.4440 | <i>L. infantum</i> | 51  | 64   | 114  |
| LinJ35_V3.4450 | <i>L. infantum</i> | 541 | 26   | 566  |
| LinJ35_V3.4470 | <i>L. infantum</i> | 55  | 13   | 67   |

|                |                    |     |      |      |
|----------------|--------------------|-----|------|------|
| LinJ35_V3.4470 | <i>L. infantum</i> | 48  | 84   | 131  |
| LinJ35_V3.4470 | <i>L. infantum</i> | 72  | 135  | 206  |
| LinJ35_V3.4520 | <i>L. infantum</i> | 81  | 1    | 81   |
| LinJ35_V3.4520 | <i>L. infantum</i> | 70  | 115  | 184  |
| LinJ35_V3.4520 | <i>L. infantum</i> | 76  | 189  | 264  |
| LinJ35_V3.4540 | <i>L. infantum</i> | 87  | 113  | 199  |
| LinJ35_V3.4550 | <i>L. infantum</i> | 47  | 1    | 47   |
| LinJ35_V3.4560 | <i>L. infantum</i> | 72  | 1    | 72   |
| LinJ35_V3.4560 | <i>L. infantum</i> | 416 | 84   | 499  |
| LinJ35_V3.4560 | <i>L. infantum</i> | 104 | 767  | 870  |
| LinJ35_V3.4560 | <i>L. infantum</i> | 318 | 1142 | 1459 |
| LinJ35_V3.4580 | <i>L. infantum</i> | 69  | 1    | 69   |
| LinJ35_V3.4590 | <i>L. infantum</i> | 46  | 173  | 218  |
| LinJ35_V3.4600 | <i>L. infantum</i> | 64  | 252  | 315  |
| LinJ35_V3.4600 | <i>L. infantum</i> | 87  | 510  | 596  |
| LinJ35_V3.4600 | <i>L. infantum</i> | 87  | 510  | 596  |
| LinJ35_V3.4610 | <i>L. infantum</i> | 57  | 142  | 198  |
| LinJ35_V3.4610 | <i>L. infantum</i> | 52  | 571  | 622  |
| LinJ35_V3.4610 | <i>L. infantum</i> | 52  | 571  | 622  |
| LinJ35_V3.4630 | <i>L. infantum</i> | 162 | 99   | 260  |
| LinJ35_V3.4650 | <i>L. infantum</i> | 50  | 1    | 50   |
| LinJ35_V3.4650 | <i>L. infantum</i> | 44  | 334  | 377  |
| LinJ35_V3.4650 | <i>L. infantum</i> | 155 | 404  | 558  |
| LinJ35_V3.4670 | <i>L. infantum</i> | 89  | 83   | 171  |
| LinJ35_V3.4670 | <i>L. infantum</i> | 300 | 213  | 512  |
| LinJ35_V3.4710 | <i>L. infantum</i> | 114 | 1    | 114  |
| LinJ35_V3.4720 | <i>L. infantum</i> | 72  | 29   | 100  |
| LinJ35_V3.4720 | <i>L. infantum</i> | 56  | 106  | 161  |
| LinJ35_V3.4730 | <i>L. infantum</i> | 53  | 144  | 196  |
| LinJ35_V3.4740 | <i>L. infantum</i> | 142 | 293  | 434  |
| LinJ35_V3.4760 | <i>L. infantum</i> | 142 | 1    | 142  |
| LinJ35_V3.4770 | <i>L. infantum</i> | 44  | 210  | 253  |
| LinJ35_V3.4780 | <i>L. infantum</i> | 55  | 670  | 724  |
| LinJ35_V3.4830 | <i>L. infantum</i> | 46  | 170  | 215  |
| LinJ35_V3.4830 | <i>L. infantum</i> | 52  | 303  | 354  |
| LinJ35_V3.4830 | <i>L. infantum</i> | 52  | 303  | 354  |
| LinJ35_V3.4850 | <i>L. infantum</i> | 41  | 1    | 41   |
| LinJ35_V3.4860 | <i>L. infantum</i> | 65  | 1    | 65   |
| LinJ35_V3.4860 | <i>L. infantum</i> | 151 | 1322 | 1472 |
| LinJ35_V3.4890 | <i>L. infantum</i> | 46  | 329  | 374  |
| LinJ35_V3.4920 | <i>L. infantum</i> | 66  | 1    | 66   |
| LinJ35_V3.4930 | <i>L. infantum</i> | 126 | 44   | 169  |
| LinJ35_V3.4930 | <i>L. infantum</i> | 444 | 171  | 614  |
| LinJ35_V3.4930 | <i>L. infantum</i> | 313 | 631  | 943  |
| LinJ35_V3.4960 | <i>L. infantum</i> | 58  | 1    | 58   |
| LinJ35_V3.4970 | <i>L. infantum</i> | 40  | 274  | 313  |
| LinJ35_V3.4970 | <i>L. infantum</i> | 46  | 698  | 743  |

|                |                    |     |      |      |
|----------------|--------------------|-----|------|------|
| LinJ35_V3.4970 | <i>L. infantum</i> | 155 | 754  | 908  |
| LinJ35_V3.4980 | <i>L. infantum</i> | 64  | 1    | 64   |
| LinJ35_V3.4980 | <i>L. infantum</i> | 72  | 99   | 170  |
| LinJ35_V3.4990 | <i>L. infantum</i> | 164 | 27   | 190  |
| LinJ35_V3.5010 | <i>L. infantum</i> | 47  | 66   | 112  |
| LinJ35_V3.5030 | <i>L. infantum</i> | 61  | 325  | 385  |
| LinJ35_V3.5040 | <i>L. infantum</i> | 92  | 1    | 92   |
| LinJ35_V3.5080 | <i>L. infantum</i> | 111 | 1    | 111  |
| LinJ35_V3.5080 | <i>L. infantum</i> | 68  | 1463 | 1530 |
| LinJ35_V3.5080 | <i>L. infantum</i> | 60  | 2456 | 2515 |
| LinJ35_V3.5080 | <i>L. infantum</i> | 76  | 5083 | 5158 |
| LinJ35_V3.5080 | <i>L. infantum</i> | 40  | 5421 | 5460 |
| LinJ35_V3.5090 | <i>L. infantum</i> | 40  | 197  | 236  |
| LinJ35_V3.5100 | <i>L. infantum</i> | 41  | 34   | 74   |
| LinJ35_V3.5100 | <i>L. infantum</i> | 58  | 88   | 145  |
| LinJ35_V3.5100 | <i>L. infantum</i> | 48  | 259  | 306  |
| LinJ35_V3.5100 | <i>L. infantum</i> | 44  | 327  | 370  |
| LinJ35_V3.5120 | <i>L. infantum</i> | 49  | 258  | 306  |
| LinJ35_V3.5140 | <i>L. infantum</i> | 46  | 1    | 46   |
| LinJ35_V3.5150 | <i>L. infantum</i> | 57  | 267  | 323  |
| LinJ35_V3.5170 | <i>L. infantum</i> | 122 | 136  | 257  |
| LinJ35_V3.5180 | <i>L. infantum</i> | 43  | 1    | 43   |
| LinJ35_V3.5180 | <i>L. infantum</i> | 71  | 394  | 464  |
| LinJ35_V3.5190 | <i>L. infantum</i> | 42  | 81   | 122  |
| LinJ35_V3.5190 | <i>L. infantum</i> | 68  | 159  | 226  |
| LinJ35_V3.5190 | <i>L. infantum</i> | 57  | 262  | 318  |
| LinJ35_V3.5240 | <i>L. infantum</i> | 41  | 109  | 149  |
| LinJ35_V3.5260 | <i>L. infantum</i> | 48  | 65   | 112  |
| LinJ35_V3.5270 | <i>L. infantum</i> | 41  | 171  | 211  |
| LinJ35_V3.5280 | <i>L. infantum</i> | 63  | 1    | 63   |
| LinJ35_V3.5290 | <i>L. infantum</i> | 48  | 93   | 140  |
| LinJ35_V3.5290 | <i>L. infantum</i> | 81  | 176  | 256  |
| LinJ35_V3.5290 | <i>L. infantum</i> | 81  | 176  | 256  |
| LinJ35_V3.5310 | <i>L. infantum</i> | 40  | 164  | 203  |
| LinJ35_V3.5330 | <i>L. infantum</i> | 113 | 270  | 382  |
| LinJ35_V3.5340 | <i>L. infantum</i> | 54  | 843  | 896  |
| LinJ35_V3.5350 | <i>L. infantum</i> | 42  | 60   | 101  |
| LinJ35_V3.5350 | <i>L. infantum</i> | 153 | 113  | 265  |
| LinJ35_V3.5350 | <i>L. infantum</i> | 97  | 283  | 379  |
| LinJ35_V3.5360 | <i>L. infantum</i> | 125 | 381  | 505  |
| LinJ35_V3.5370 | <i>L. infantum</i> | 42  | 37   | 78   |
| LinJ35_V3.5370 | <i>L. infantum</i> | 252 | 90   | 341  |
| LinJ35_V3.5370 | <i>L. infantum</i> | 148 | 382  | 529  |
| LinJ35_V3.5380 | <i>L. infantum</i> | 148 | 53   | 200  |
| LinJ35_V3.5380 | <i>L. infantum</i> | 79  | 254  | 332  |
| LinJ35_V3.5400 | <i>L. infantum</i> | 42  | 96   | 137  |
| LinJ35_V3.5410 | <i>L. infantum</i> | 59  | 1    | 59   |

|                |                    |     |     |     |
|----------------|--------------------|-----|-----|-----|
| LinJ35_V3.5430 | <i>L. infantum</i> | 55  | 219 | 273 |
| LinJ36_V3.0010 | <i>L. infantum</i> | 83  | 1   | 83  |
| LinJ36_V3.0010 | <i>L. infantum</i> | 49  | 136 | 184 |
| LinJ36_V3.0010 | <i>L. infantum</i> | 49  | 136 | 184 |
| LinJ36_V3.0020 | <i>L. infantum</i> | 49  | 1   | 49  |
| LinJ36_V3.0050 | <i>L. infantum</i> | 57  | 1   | 57  |
| LinJ36_V3.0050 | <i>L. infantum</i> | 125 | 429 | 553 |
| LinJ36_V3.0050 | <i>L. infantum</i> | 125 | 429 | 553 |
| LinJ36_V3.0070 | <i>L. infantum</i> | 65  | 13  | 77  |
| LinJ36_V3.0070 | <i>L. infantum</i> | 104 | 89  | 192 |
| LinJ36_V3.0070 | <i>L. infantum</i> | 69  | 210 | 278 |
| LinJ36_V3.0080 | <i>L. infantum</i> | 53  | 98  | 150 |
| LinJ36_V3.0110 | <i>L. infantum</i> | 73  | 477 | 549 |
| LinJ36_V3.0120 | <i>L. infantum</i> | 44  | 482 | 525 |
| LinJ36_V3.0140 | <i>L. infantum</i> | 41  | 1   | 41  |
| LinJ36_V3.0140 | <i>L. infantum</i> | 161 | 96  | 256 |
| LinJ36_V3.0150 | <i>L. infantum</i> | 63  | 582 | 644 |
| LinJ36_V3.0170 | <i>L. infantum</i> | 48  | 238 | 285 |
| LinJ36_V3.0180 | <i>L. infantum</i> | 40  | 116 | 155 |
| LinJ36_V3.0220 | <i>L. infantum</i> | 47  | 98  | 144 |
| LinJ36_V3.0260 | <i>L. infantum</i> | 84  | 1   | 84  |
| LinJ36_V3.0260 | <i>L. infantum</i> | 106 | 119 | 224 |
| LinJ36_V3.0260 | <i>L. infantum</i> | 106 | 119 | 224 |
| LinJ36_V3.0270 | <i>L. infantum</i> | 49  | 311 | 359 |
| LinJ36_V3.0270 | <i>L. infantum</i> | 87  | 458 | 544 |
| LinJ36_V3.0290 | <i>L. infantum</i> | 127 | 76  | 202 |
| LinJ36_V3.0290 | <i>L. infantum</i> | 100 | 581 | 680 |
| LinJ36_V3.0300 | <i>L. infantum</i> | 50  | 79  | 128 |
| LinJ36_V3.0300 | <i>L. infantum</i> | 61  | 141 | 201 |
| LinJ36_V3.0300 | <i>L. infantum</i> | 61  | 141 | 201 |
| LinJ36_V3.0310 | <i>L. infantum</i> | 50  | 182 | 231 |
| LinJ36_V3.0380 | <i>L. infantum</i> | 53  | 1   | 53  |
| LinJ36_V3.0380 | <i>L. infantum</i> | 125 | 82  | 206 |
| LinJ36_V3.0380 | <i>L. infantum</i> | 125 | 82  | 206 |
| LinJ36_V3.0390 | <i>L. infantum</i> | 43  | 71  | 113 |
| LinJ36_V3.0400 | <i>L. infantum</i> | 81  | 1   | 81  |
| LinJ36_V3.0400 | <i>L. infantum</i> | 43  | 326 | 368 |
| LinJ36_V3.0400 | <i>L. infantum</i> | 43  | 326 | 368 |
| LinJ36_V3.0410 | <i>L. infantum</i> | 139 | 15  | 153 |
| LinJ36_V3.0420 | <i>L. infantum</i> | 114 | 1   | 114 |
| LinJ36_V3.0420 | <i>L. infantum</i> | 96  | 287 | 382 |
| LinJ36_V3.0430 | <i>L. infantum</i> | 65  | 43  | 107 |
| LinJ36_V3.0430 | <i>L. infantum</i> | 48  | 165 | 212 |
| LinJ36_V3.0430 | <i>L. infantum</i> | 122 | 253 | 374 |
| LinJ36_V3.0440 | <i>L. infantum</i> | 46  | 1   | 46  |
| LinJ36_V3.0460 | <i>L. infantum</i> | 59  | 153 | 211 |
| LinJ36_V3.0480 | <i>L. infantum</i> | 79  | 1   | 79  |



|                |                    |     |     |     |
|----------------|--------------------|-----|-----|-----|
| LinJ36_V3.0480 | <i>L. infantum</i> | 412 | 117 | 528 |
| LinJ36_V3.0500 | <i>L. infantum</i> | 40  | 400 | 439 |
| LinJ36_V3.0510 | <i>L. infantum</i> | 46  | 14  | 59  |
| LinJ36_V3.0520 | <i>L. infantum</i> | 78  | 39  | 116 |
| LinJ36_V3.0520 | <i>L. infantum</i> | 229 | 120 | 348 |
| LinJ36_V3.0530 | <i>L. infantum</i> | 43  | 337 | 379 |
| LinJ36_V3.0530 | <i>L. infantum</i> | 101 | 410 | 510 |
| LinJ36_V3.0530 | <i>L. infantum</i> | 101 | 410 | 510 |
| LinJ36_V3.0540 | <i>L. infantum</i> | 47  | 1   | 47  |
| LinJ36_V3.0540 | <i>L. infantum</i> | 45  | 259 | 303 |
| LinJ36_V3.0540 | <i>L. infantum</i> | 45  | 259 | 303 |
| LinJ36_V3.0550 | <i>L. infantum</i> | 71  | 41  | 111 |
| LinJ36_V3.0550 | <i>L. infantum</i> | 53  | 295 | 347 |
| LinJ36_V3.0550 | <i>L. infantum</i> | 53  | 295 | 347 |
| LinJ36_V3.0570 | <i>L. infantum</i> | 56  | 86  | 141 |
| LinJ36_V3.0590 | <i>L. infantum</i> | 236 | 63  | 298 |
| LinJ36_V3.0610 | <i>L. infantum</i> | 61  | 74  | 134 |
| LinJ36_V3.0610 | <i>L. infantum</i> | 113 | 172 | 284 |
| LinJ36_V3.0620 | <i>L. infantum</i> | 53  | 411 | 463 |
| LinJ36_V3.0620 | <i>L. infantum</i> | 42  | 705 | 746 |
| LinJ36_V3.0620 | <i>L. infantum</i> | 42  | 705 | 746 |
| LinJ36_V3.0630 | <i>L. infantum</i> | 85  | 63  | 147 |
| LinJ36_V3.0630 | <i>L. infantum</i> | 51  | 442 | 492 |
| LinJ36_V3.0630 | <i>L. infantum</i> | 51  | 442 | 492 |
| LinJ36_V3.0640 | <i>L. infantum</i> | 98  | 329 | 426 |
| LinJ36_V3.0660 | <i>L. infantum</i> | 56  | 66  | 121 |
| LinJ36_V3.0670 | <i>L. infantum</i> | 89  | 1   | 89  |
| LinJ36_V3.0670 | <i>L. infantum</i> | 52  | 111 | 162 |
| LinJ36_V3.0670 | <i>L. infantum</i> | 43  | 218 | 260 |
| LinJ36_V3.0680 | <i>L. infantum</i> | 74  | 82  | 155 |
| LinJ36_V3.0700 | <i>L. infantum</i> | 47  | 270 | 316 |
| LinJ36_V3.0720 | <i>L. infantum</i> | 48  | 31  | 78  |
| LinJ36_V3.0740 | <i>L. infantum</i> | 301 | 1   | 301 |
| LinJ36_V3.0740 | <i>L. infantum</i> | 375 | 336 | 710 |
| LinJ36_V3.0740 | <i>L. infantum</i> | 120 | 748 | 867 |
| LinJ36_V3.0750 | <i>L. infantum</i> | 66  | 11  | 76  |
| LinJ36_V3.0760 | <i>L. infantum</i> | 72  | 1   | 72  |
| LinJ36_V3.0760 | <i>L. infantum</i> | 50  | 180 | 229 |
| LinJ36_V3.0770 | <i>L. infantum</i> | 75  | 130 | 204 |
| LinJ36_V3.0780 | <i>L. infantum</i> | 150 | 307 | 456 |
| LinJ36_V3.0790 | <i>L. infantum</i> | 77  | 1   | 77  |
| LinJ36_V3.0790 | <i>L. infantum</i> | 69  | 293 | 361 |
| LinJ36_V3.0790 | <i>L. infantum</i> | 130 | 376 | 505 |
| LinJ36_V3.0800 | <i>L. infantum</i> | 200 | 1   | 200 |
| LinJ36_V3.0800 | <i>L. infantum</i> | 59  | 216 | 274 |
| LinJ36_V3.0800 | <i>L. infantum</i> | 65  | 479 | 543 |
| LinJ36_V3.0810 | <i>L. infantum</i> | 103 | 117 | 219 |

|                |                    |     |      |      |
|----------------|--------------------|-----|------|------|
| LinJ36_V3.0810 | <i>L. infantum</i> | 255 | 295  | 549  |
| LinJ36_V3.0810 | <i>L. infantum</i> | 97  | 1094 | 1190 |
| LinJ36_V3.0810 | <i>L. infantum</i> | 61  | 1224 | 1284 |
| LinJ36_V3.0820 | <i>L. infantum</i> | 224 | 1    | 224  |
| LinJ36_V3.0820 | <i>L. infantum</i> | 75  | 329  | 403  |
| LinJ36_V3.0820 | <i>L. infantum</i> | 76  | 700  | 775  |
| LinJ36_V3.0830 | <i>L. infantum</i> | 52  | 82   | 133  |
| LinJ36_V3.0830 | <i>L. infantum</i> | 57  | 162  | 218  |
| LinJ36_V3.0830 | <i>L. infantum</i> | 198 | 241  | 438  |
| LinJ36_V3.0840 | <i>L. infantum</i> | 173 | 1    | 173  |
| LinJ36_V3.0840 | <i>L. infantum</i> | 205 | 212  | 416  |
| LinJ36_V3.0840 | <i>L. infantum</i> | 57  | 715  | 771  |
| LinJ36_V3.0840 | <i>L. infantum</i> | 58  | 963  | 1020 |
| LinJ36_V3.0850 | <i>L. infantum</i> | 132 | 1    | 132  |
| LinJ36_V3.0850 | <i>L. infantum</i> | 395 | 167  | 561  |
| LinJ36_V3.0860 | <i>L. infantum</i> | 53  | 108  | 160  |
| LinJ36_V3.0860 | <i>L. infantum</i> | 54  | 422  | 475  |
| LinJ36_V3.0860 | <i>L. infantum</i> | 54  | 422  | 475  |
| LinJ36_V3.0880 | <i>L. infantum</i> | 63  | 45   | 107  |
| LinJ36_V3.0890 | <i>L. infantum</i> | 48  | 411  | 458  |
| LinJ36_V3.0890 | <i>L. infantum</i> | 158 | 524  | 681  |
| LinJ36_V3.0890 | <i>L. infantum</i> | 64  | 718  | 781  |
| LinJ36_V3.0890 | <i>L. infantum</i> | 104 | 812  | 915  |
| LinJ36_V3.0890 | <i>L. infantum</i> | 41  | 1070 | 1110 |
| LinJ36_V3.0890 | <i>L. infantum</i> | 61  | 1358 | 1418 |
| LinJ36_V3.0890 | <i>L. infantum</i> | 90  | 1711 | 1800 |
| LinJ36_V3.0900 | <i>L. infantum</i> | 94  | 1    | 94   |
| LinJ36_V3.0900 | <i>L. infantum</i> | 73  | 386  | 458  |
| LinJ36_V3.0900 | <i>L. infantum</i> | 170 | 481  | 650  |
| LinJ36_V3.0900 | <i>L. infantum</i> | 132 | 655  | 786  |
| LinJ36_V3.0910 | <i>L. infantum</i> | 266 | 42   | 307  |
| LinJ36_V3.0910 | <i>L. infantum</i> | 240 | 528  | 767  |
| LinJ36_V3.0920 | <i>L. infantum</i> | 99  | 301  | 399  |
| LinJ36_V3.0920 | <i>L. infantum</i> | 108 | 418  | 525  |
| LinJ36_V3.0930 | <i>L. infantum</i> | 127 | 73   | 199  |
| LinJ36_V3.0930 | <i>L. infantum</i> | 47  | 239  | 285  |
| LinJ36_V3.0930 | <i>L. infantum</i> | 53  | 835  | 887  |
| LinJ36_V3.0960 | <i>L. infantum</i> | 105 | 408  | 512  |
| LinJ36_V3.0960 | <i>L. infantum</i> | 99  | 557  | 655  |
| LinJ36_V3.0970 | <i>L. infantum</i> | 84  | 1    | 84   |
| LinJ36_V3.0970 | <i>L. infantum</i> | 82  | 119  | 200  |
| LinJ36_V3.0970 | <i>L. infantum</i> | 42  | 685  | 726  |
| LinJ36_V3.0970 | <i>L. infantum</i> | 90  | 1081 | 1170 |
| LinJ36_V3.0970 | <i>L. infantum</i> | 98  | 1181 | 1278 |
| LinJ36_V3.0980 | <i>L. infantum</i> | 50  | 84   | 133  |
| LinJ36_V3.0980 | <i>L. infantum</i> | 83  | 397  | 479  |
| LinJ36_V3.0980 | <i>L. infantum</i> | 67  | 507  | 573  |

|                |                    |     |      |      |
|----------------|--------------------|-----|------|------|
| LinJ36_V3.0990 | <i>L. infantum</i> | 66  | 101  | 166  |
| LinJ36_V3.1000 | <i>L. infantum</i> | 66  | 88   | 153  |
| LinJ36_V3.1010 | <i>L. infantum</i> | 58  | 512  | 569  |
| LinJ36_V3.1010 | <i>L. infantum</i> | 114 | 2716 | 2829 |
| LinJ36_V3.1010 | <i>L. infantum</i> | 75  | 2948 | 3022 |
| LinJ36_V3.1020 | <i>L. infantum</i> | 76  | 33   | 108  |
| LinJ36_V3.1020 | <i>L. infantum</i> | 275 | 200  | 474  |
| LinJ36_V3.1020 | <i>L. infantum</i> | 62  | 497  | 558  |
| LinJ36_V3.1030 | <i>L. infantum</i> | 61  | 48   | 108  |
| LinJ36_V3.1040 | <i>L. infantum</i> | 77  | 92   | 168  |
| LinJ36_V3.1050 | <i>L. infantum</i> | 77  | 92   | 168  |
| LinJ36_V3.1060 | <i>L. infantum</i> | 48  | 627  | 674  |
| LinJ36_V3.1070 | <i>L. infantum</i> | 69  | 283  | 351  |
| LinJ36_V3.1070 | <i>L. infantum</i> | 40  | 527  | 566  |
| LinJ36_V3.1070 | <i>L. infantum</i> | 50  | 575  | 624  |
| LinJ36_V3.1070 | <i>L. infantum</i> | 67  | 746  | 812  |
| LinJ36_V3.1070 | <i>L. infantum</i> | 44  | 992  | 1035 |
| LinJ36_V3.1070 | <i>L. infantum</i> | 45  | 1160 | 1204 |
| LinJ36_V3.1070 | <i>L. infantum</i> | 41  | 1261 | 1301 |
| LinJ36_V3.1080 | <i>L. infantum</i> | 70  | 91   | 160  |
| LinJ36_V3.1090 | <i>L. infantum</i> | 96  | 1    | 96   |
| LinJ36_V3.1090 | <i>L. infantum</i> | 132 | 98   | 229  |
| LinJ36_V3.1090 | <i>L. infantum</i> | 142 | 306  | 447  |
| LinJ36_V3.1090 | <i>L. infantum</i> | 46  | 473  | 518  |
| LinJ36_V3.1090 | <i>L. infantum</i> | 42  | 533  | 574  |
| LinJ36_V3.1090 | <i>L. infantum</i> | 86  | 781  | 866  |
| LinJ36_V3.1100 | <i>L. infantum</i> | 61  | 170  | 230  |
| LinJ36_V3.1100 | <i>L. infantum</i> | 48  | 239  | 286  |
| LinJ36_V3.1100 | <i>L. infantum</i> | 48  | 239  | 286  |
| LinJ36_V3.1110 | <i>L. infantum</i> | 63  | 1    | 63   |
| LinJ36_V3.1110 | <i>L. infantum</i> | 60  | 72   | 131  |
| LinJ36_V3.1110 | <i>L. infantum</i> | 40  | 415  | 454  |
| LinJ36_V3.1120 | <i>L. infantum</i> | 111 | 125  | 235  |
| LinJ36_V3.1120 | <i>L. infantum</i> | 75  | 392  | 466  |
| LinJ36_V3.1120 | <i>L. infantum</i> | 97  | 571  | 667  |
| LinJ36_V3.1120 | <i>L. infantum</i> | 125 | 703  | 827  |
| LinJ36_V3.1120 | <i>L. infantum</i> | 50  | 884  | 933  |
| LinJ36_V3.1130 | <i>L. infantum</i> | 64  | 61   | 124  |
| LinJ36_V3.1140 | <i>L. infantum</i> | 58  | 250  | 307  |
| LinJ36_V3.1160 | <i>L. infantum</i> | 64  | 61   | 124  |
| LinJ36_V3.1170 | <i>L. infantum</i> | 56  | 249  | 304  |
| LinJ36_V3.1170 | <i>L. infantum</i> | 51  | 322  | 372  |
| LinJ36_V3.1170 | <i>L. infantum</i> | 47  | 446  | 492  |
| LinJ36_V3.1180 | <i>L. infantum</i> | 67  | 55   | 121  |
| LinJ36_V3.1210 | <i>L. infantum</i> | 204 | 1    | 204  |
| LinJ36_V3.1210 | <i>L. infantum</i> | 238 | 346  | 583  |
| LinJ36_V3.1210 | <i>L. infantum</i> | 93  | 604  | 696  |

|                |                    |     |      |      |
|----------------|--------------------|-----|------|------|
| LinJ36_V3.1210 | <i>L. infantum</i> | 71  | 840  | 910  |
| LinJ36_V3.1210 | <i>L. infantum</i> | 43  | 913  | 955  |
| LinJ36_V3.1210 | <i>L. infantum</i> | 69  | 957  | 1025 |
| LinJ36_V3.1210 | <i>L. infantum</i> | 54  | 1075 | 1128 |
| LinJ36_V3.1220 | <i>L. infantum</i> | 42  | 1    | 42   |
| LinJ36_V3.1230 | <i>L. infantum</i> | 53  | 62   | 114  |
| LinJ36_V3.1230 | <i>L. infantum</i> | 45  | 159  | 203  |
| LinJ36_V3.1230 | <i>L. infantum</i> | 73  | 288  | 360  |
| LinJ36_V3.1280 | <i>L. infantum</i> | 73  | 1    | 73   |
| LinJ36_V3.1280 | <i>L. infantum</i> | 126 | 111  | 236  |
| LinJ36_V3.1280 | <i>L. infantum</i> | 48  | 249  | 296  |
| LinJ36_V3.1280 | <i>L. infantum</i> | 199 | 298  | 496  |
| LinJ36_V3.1290 | <i>L. infantum</i> | 73  | 172  | 244  |
| LinJ36_V3.1300 | <i>L. infantum</i> | 129 | 168  | 296  |
| LinJ36_V3.1320 | <i>L. infantum</i> | 50  | 322  | 371  |
| LinJ36_V3.1330 | <i>L. infantum</i> | 50  | 65   | 114  |
| LinJ36_V3.1340 | <i>L. infantum</i> | 125 | 14   | 138  |
| LinJ36_V3.1350 | <i>L. infantum</i> | 100 | 97   | 196  |
| LinJ36_V3.1350 | <i>L. infantum</i> | 64  | 398  | 461  |
| LinJ36_V3.1360 | <i>L. infantum</i> | 157 | 101  | 257  |
| LinJ36_V3.1370 | <i>L. infantum</i> | 215 | 1    | 215  |
| LinJ36_V3.1370 | <i>L. infantum</i> | 142 | 269  | 410  |
| LinJ36_V3.1380 | <i>L. infantum</i> | 43  | 1    | 43   |
| LinJ36_V3.1380 | <i>L. infantum</i> | 78  | 65   | 142  |
| LinJ36_V3.1380 | <i>L. infantum</i> | 78  | 65   | 142  |
| LinJ36_V3.1400 | <i>L. infantum</i> | 45  | 32   | 76   |
| LinJ36_V3.1400 | <i>L. infantum</i> | 105 | 135  | 239  |
| LinJ36_V3.1400 | <i>L. infantum</i> | 46  | 241  | 286  |
| LinJ36_V3.1420 | <i>L. infantum</i> | 92  | 599  | 690  |
| LinJ36_V3.1430 | <i>L. infantum</i> | 65  | 1    | 65   |
| LinJ36_V3.1440 | <i>L. infantum</i> | 81  | 47   | 127  |
| LinJ36_V3.1440 | <i>L. infantum</i> | 50  | 180  | 229  |
| LinJ36_V3.1440 | <i>L. infantum</i> | 85  | 257  | 341  |
| LinJ36_V3.1440 | <i>L. infantum</i> | 60  | 351  | 410  |
| LinJ36_V3.1440 | <i>L. infantum</i> | 196 | 451  | 646  |
| LinJ36_V3.1440 | <i>L. infantum</i> | 253 | 832  | 1084 |
| LinJ36_V3.1450 | <i>L. infantum</i> | 58  | 53   | 110  |
| LinJ36_V3.1460 | <i>L. infantum</i> | 313 | 138  | 450  |
| LinJ36_V3.1470 | <i>L. infantum</i> | 178 | 1    | 178  |
| LinJ36_V3.1470 | <i>L. infantum</i> | 99  | 388  | 486  |
| LinJ36_V3.1470 | <i>L. infantum</i> | 54  | 762  | 815  |
| LinJ36_V3.1480 | <i>L. infantum</i> | 59  | 39   | 97   |
| LinJ36_V3.1490 | <i>L. infantum</i> | 69  | 59   | 127  |
| LinJ36_V3.1500 | <i>L. infantum</i> | 42  | 56   | 97   |
| LinJ36_V3.1500 | <i>L. infantum</i> | 70  | 140  | 209  |
| LinJ36_V3.1500 | <i>L. infantum</i> | 61  | 839  | 899  |
| LinJ36_V3.1500 | <i>L. infantum</i> | 105 | 929  | 1033 |

|                |                    |     |      |      |
|----------------|--------------------|-----|------|------|
| LinJ36_V3.1500 | <i>L. infantum</i> | 52  | 1818 | 1869 |
| LinJ36_V3.1500 | <i>L. infantum</i> | 58  | 1890 | 1947 |
| LinJ36_V3.1500 | <i>L. infantum</i> | 111 | 2056 | 2166 |
| LinJ36_V3.1500 | <i>L. infantum</i> | 66  | 2214 | 2279 |
| LinJ36_V3.1500 | <i>L. infantum</i> | 54  | 2349 | 2402 |
| LinJ36_V3.1500 | <i>L. infantum</i> | 51  | 3061 | 3111 |
| LinJ36_V3.1500 | <i>L. infantum</i> | 69  | 3251 | 3319 |
| LinJ36_V3.1500 | <i>L. infantum</i> | 52  | 4075 | 4126 |
| LinJ36_V3.1500 | <i>L. infantum</i> | 60  | 5229 | 5288 |
| LinJ36_V3.1520 | <i>L. infantum</i> | 333 | 1    | 333  |
| LinJ36_V3.1520 | <i>L. infantum</i> | 309 | 347  | 655  |
| LinJ36_V3.1530 | <i>L. infantum</i> | 81  | 1    | 81   |
| LinJ36_V3.1530 | <i>L. infantum</i> | 108 | 410  | 517  |
| LinJ36_V3.1530 | <i>L. infantum</i> | 116 | 581  | 696  |
| LinJ36_V3.1530 | <i>L. infantum</i> | 47  | 774  | 820  |
| LinJ36_V3.1530 | <i>L. infantum</i> | 106 | 860  | 965  |
| LinJ36_V3.1540 | <i>L. infantum</i> | 72  | 28   | 99   |
| LinJ36_V3.1540 | <i>L. infantum</i> | 61  | 246  | 306  |
| LinJ36_V3.1540 | <i>L. infantum</i> | 61  | 246  | 306  |
| LinJ36_V3.1550 | <i>L. infantum</i> | 532 | 1    | 532  |
| LinJ36_V3.1550 | <i>L. infantum</i> | 502 | 563  | 1064 |
| LinJ36_V3.1550 | <i>L. infantum</i> | 103 | 1099 | 1201 |
| LinJ36_V3.1560 | <i>L. infantum</i> | 149 | 222  | 370  |
| LinJ36_V3.1560 | <i>L. infantum</i> | 43  | 561  | 603  |
| LinJ36_V3.1560 | <i>L. infantum</i> | 93  | 708  | 800  |
| LinJ36_V3.1560 | <i>L. infantum</i> | 109 | 840  | 948  |
| LinJ36_V3.1570 | <i>L. infantum</i> | 66  | 41   | 106  |
| LinJ36_V3.1580 | <i>L. infantum</i> | 42  | 327  | 368  |
| LinJ36_V3.1590 | <i>L. infantum</i> | 55  | 316  | 370  |
| LinJ36_V3.1600 | <i>L. infantum</i> | 50  | 1    | 50   |
| LinJ36_V3.1600 | <i>L. infantum</i> | 435 | 56   | 490  |
| LinJ36_V3.1600 | <i>L. infantum</i> | 47  | 611  | 657  |
| LinJ36_V3.1600 | <i>L. infantum</i> | 62  | 875  | 936  |
| LinJ36_V3.1610 | <i>L. infantum</i> | 56  | 177  | 232  |
| LinJ36_V3.1610 | <i>L. infantum</i> | 53  | 378  | 430  |
| LinJ36_V3.1610 | <i>L. infantum</i> | 58  | 509  | 566  |
| LinJ36_V3.1610 | <i>L. infantum</i> | 122 | 571  | 692  |
| LinJ36_V3.1610 | <i>L. infantum</i> | 110 | 739  | 848  |
| LinJ36_V3.1620 | <i>L. infantum</i> | 105 | 305  | 409  |
| LinJ36_V3.1630 | <i>L. infantum</i> | 424 | 40   | 463  |
| LinJ36_V3.1640 | <i>L. infantum</i> | 119 | 1    | 119  |
| LinJ36_V3.1640 | <i>L. infantum</i> | 44  | 197  | 240  |
| LinJ36_V3.1640 | <i>L. infantum</i> | 44  | 485  | 528  |
| LinJ36_V3.1640 | <i>L. infantum</i> | 71  | 581  | 651  |
| LinJ36_V3.1640 | <i>L. infantum</i> | 285 | 685  | 969  |
| LinJ36_V3.1640 | <i>L. infantum</i> | 43  | 1170 | 1212 |
| LinJ36_V3.1640 | <i>L. infantum</i> | 77  | 1248 | 1324 |

|                |                    |     |      |      |
|----------------|--------------------|-----|------|------|
| LinJ36_V3.1640 | <i>L. infantum</i> | 85  | 1420 | 1504 |
| LinJ36_V3.1640 | <i>L. infantum</i> | 73  | 1570 | 1642 |
| LinJ36_V3.1650 | <i>L. infantum</i> | 93  | 1    | 93   |
| LinJ36_V3.1650 | <i>L. infantum</i> | 62  | 1066 | 1127 |
| LinJ36_V3.1650 | <i>L. infantum</i> | 71  | 1138 | 1208 |
| LinJ36_V3.1660 | <i>L. infantum</i> | 123 | 1    | 123  |
| LinJ36_V3.1680 | <i>L. infantum</i> | 115 | 1    | 115  |
| LinJ36_V3.1690 | <i>L. infantum</i> | 115 | 1    | 115  |
| LinJ36_V3.1700 | <i>L. infantum</i> | 72  | 1622 | 1693 |
| LinJ36_V3.1710 | <i>L. infantum</i> | 135 | 1    | 135  |
| LinJ36_V3.1720 | <i>L. infantum</i> | 271 | 1    | 271  |
| LinJ36_V3.1730 | <i>L. infantum</i> | 49  | 24   | 72   |
| LinJ36_V3.1740 | <i>L. infantum</i> | 59  | 1    | 59   |
| LinJ36_V3.1740 | <i>L. infantum</i> | 379 | 76   | 454  |
| LinJ36_V3.1740 | <i>L. infantum</i> | 99  | 779  | 877  |
| LinJ36_V3.1750 | <i>L. infantum</i> | 54  | 256  | 309  |
| LinJ36_V3.1760 | <i>L. infantum</i> | 50  | 18   | 67   |
| LinJ36_V3.1760 | <i>L. infantum</i> | 62  | 321  | 382  |
| LinJ36_V3.1760 | <i>L. infantum</i> | 84  | 510  | 593  |
| LinJ36_V3.1760 | <i>L. infantum</i> | 94  | 633  | 726  |
| LinJ36_V3.1770 | <i>L. infantum</i> | 45  | 138  | 182  |
| LinJ36_V3.1780 | <i>L. infantum</i> | 390 | 38   | 427  |
| LinJ36_V3.1780 | <i>L. infantum</i> | 90  | 457  | 546  |
| LinJ36_V3.1790 | <i>L. infantum</i> | 73  | 1    | 73   |
| LinJ36_V3.1800 | <i>L. infantum</i> | 172 | 12   | 183  |
| LinJ36_V3.1800 | <i>L. infantum</i> | 45  | 291  | 335  |
| LinJ36_V3.1800 | <i>L. infantum</i> | 85  | 390  | 474  |
| LinJ36_V3.1800 | <i>L. infantum</i> | 74  | 558  | 631  |
| LinJ36_V3.1800 | <i>L. infantum</i> | 51  | 812  | 862  |
| LinJ36_V3.1800 | <i>L. infantum</i> | 111 | 884  | 994  |
| LinJ36_V3.1800 | <i>L. infantum</i> | 75  | 1076 | 1150 |
| LinJ36_V3.1800 | <i>L. infantum</i> | 54  | 1465 | 1518 |
| LinJ36_V3.1800 | <i>L. infantum</i> | 40  | 2004 | 2043 |
| LinJ36_V3.1800 | <i>L. infantum</i> | 44  | 2119 | 2162 |
| LinJ36_V3.1800 | <i>L. infantum</i> | 78  | 2288 | 2365 |
| LinJ36_V3.1800 | <i>L. infantum</i> | 46  | 2598 | 2643 |
| LinJ36_V3.1800 | <i>L. infantum</i> | 74  | 2872 | 2945 |
| LinJ36_V3.1800 | <i>L. infantum</i> | 65  | 3070 | 3134 |
| LinJ36_V3.1800 | <i>L. infantum</i> | 44  | 3226 | 3269 |
| LinJ36_V3.1800 | <i>L. infantum</i> | 64  | 3344 | 3407 |
| LinJ36_V3.1800 | <i>L. infantum</i> | 60  | 3410 | 3469 |
| LinJ36_V3.1800 | <i>L. infantum</i> | 99  | 3970 | 4068 |
| LinJ36_V3.1810 | <i>L. infantum</i> | 66  | 44   | 109  |
| LinJ36_V3.1810 | <i>L. infantum</i> | 72  | 249  | 320  |
| LinJ36_V3.1810 | <i>L. infantum</i> | 65  | 704  | 768  |
| LinJ36_V3.1810 | <i>L. infantum</i> | 159 | 793  | 951  |
| LinJ36_V3.1820 | <i>L. infantum</i> | 110 | 1    | 110  |

|                |                    |     |      |      |
|----------------|--------------------|-----|------|------|
| LinJ36_V3.1820 | <i>L. infantum</i> | 100 | 226  | 325  |
| LinJ36_V3.1820 | <i>L. infantum</i> | 49  | 733  | 781  |
| LinJ36_V3.1820 | <i>L. infantum</i> | 53  | 796  | 848  |
| LinJ36_V3.1820 | <i>L. infantum</i> | 66  | 959  | 1024 |
| LinJ36_V3.1820 | <i>L. infantum</i> | 57  | 1091 | 1147 |
| LinJ36_V3.1830 | <i>L. infantum</i> | 56  | 190  | 245  |
| LinJ36_V3.1860 | <i>L. infantum</i> | 137 | 94   | 230  |
| LinJ36_V3.1860 | <i>L. infantum</i> | 83  | 635  | 717  |
| LinJ36_V3.1870 | <i>L. infantum</i> | 46  | 91   | 136  |
| LinJ36_V3.1870 | <i>L. infantum</i> | 263 | 617  | 879  |
| LinJ36_V3.1880 | <i>L. infantum</i> | 195 | 1    | 195  |
| LinJ36_V3.1890 | <i>L. infantum</i> | 43  | 1    | 43   |
| LinJ36_V3.1890 | <i>L. infantum</i> | 45  | 340  | 384  |
| LinJ36_V3.1890 | <i>L. infantum</i> | 42  | 658  | 699  |
| LinJ36_V3.1900 | <i>L. infantum</i> | 165 | 151  | 315  |
| LinJ36_V3.1900 | <i>L. infantum</i> | 78  | 342  | 419  |
| LinJ36_V3.1900 | <i>L. infantum</i> | 435 | 439  | 873  |
| LinJ36_V3.1910 | <i>L. infantum</i> | 210 | 1    | 210  |
| LinJ36_V3.1910 | <i>L. infantum</i> | 67  | 227  | 293  |
| LinJ36_V3.1920 | <i>L. infantum</i> | 163 | 1    | 163  |
| LinJ36_V3.1920 | <i>L. infantum</i> | 53  | 606  | 658  |
| LinJ36_V3.1930 | <i>L. infantum</i> | 53  | 1    | 53   |
| LinJ36_V3.1930 | <i>L. infantum</i> | 99  | 429  | 527  |
| LinJ36_V3.1940 | <i>L. infantum</i> | 53  | 358  | 410  |
| LinJ36_V3.1950 | <i>L. infantum</i> | 138 | 666  | 803  |
| LinJ36_V3.1960 | <i>L. infantum</i> | 40  | 199  | 238  |
| LinJ36_V3.1960 | <i>L. infantum</i> | 54  | 378  | 431  |
| LinJ36_V3.1960 | <i>L. infantum</i> | 43  | 591  | 633  |
| LinJ36_V3.1980 | <i>L. infantum</i> | 72  | 1    | 72   |
| LinJ36_V3.1980 | <i>L. infantum</i> | 41  | 920  | 960  |
| LinJ36_V3.1980 | <i>L. infantum</i> | 319 | 988  | 1306 |
| LinJ36_V3.1980 | <i>L. infantum</i> | 226 | 1345 | 1570 |
| LinJ36_V3.1980 | <i>L. infantum</i> | 69  | 1587 | 1655 |
| LinJ36_V3.1990 | <i>L. infantum</i> | 122 | 1    | 122  |
| LinJ36_V3.1990 | <i>L. infantum</i> | 123 | 129  | 251  |
| LinJ36_V3.1990 | <i>L. infantum</i> | 125 | 290  | 414  |
| LinJ36_V3.2000 | <i>L. infantum</i> | 151 | 65   | 215  |
| LinJ36_V3.2000 | <i>L. infantum</i> | 135 | 253  | 387  |
| LinJ36_V3.2010 | <i>L. infantum</i> | 98  | 16   | 113  |
| LinJ36_V3.2010 | <i>L. infantum</i> | 43  | 148  | 190  |
| LinJ36_V3.2010 | <i>L. infantum</i> | 40  | 343  | 382  |
| LinJ36_V3.2010 | <i>L. infantum</i> | 45  | 452  | 496  |
| LinJ36_V3.2030 | <i>L. infantum</i> | 119 | 64   | 182  |
| LinJ36_V3.2030 | <i>L. infantum</i> | 49  | 233  | 281  |
| LinJ36_V3.2040 | <i>L. infantum</i> | 57  | 251  | 307  |
| LinJ36_V3.2050 | <i>L. infantum</i> | 41  | 554  | 594  |
| LinJ36_V3.2060 | <i>L. infantum</i> | 49  | 40   | 88   |

|                |                    |     |      |      |
|----------------|--------------------|-----|------|------|
| LinJ36_V3.2080 | <i>L. infantum</i> | 52  | 1    | 52   |
| LinJ36_V3.2110 | <i>L. infantum</i> | 71  | 1043 | 1113 |
| LinJ36_V3.2110 | <i>L. infantum</i> | 111 | 1143 | 1253 |
| LinJ36_V3.2120 | <i>L. infantum</i> | 250 | 40   | 289  |
| LinJ36_V3.2150 | <i>L. infantum</i> | 51  | 1    | 51   |
| LinJ36_V3.2150 | <i>L. infantum</i> | 47  | 92   | 138  |
| LinJ36_V3.2150 | <i>L. infantum</i> | 59  | 171  | 229  |
| LinJ36_V3.2150 | <i>L. infantum</i> | 174 | 426  | 599  |
| LinJ36_V3.2160 | <i>L. infantum</i> | 42  | 406  | 447  |
| LinJ36_V3.2170 | <i>L. infantum</i> | 141 | 1    | 141  |
| LinJ36_V3.2170 | <i>L. infantum</i> | 60  | 382  | 441  |
| LinJ36_V3.2170 | <i>L. infantum</i> | 73  | 513  | 585  |
| LinJ36_V3.2170 | <i>L. infantum</i> | 119 | 611  | 729  |
| LinJ36_V3.2180 | <i>L. infantum</i> | 58  | 1    | 58   |
| LinJ36_V3.2180 | <i>L. infantum</i> | 67  | 233  | 299  |
| LinJ36_V3.2180 | <i>L. infantum</i> | 109 | 398  | 506  |
| LinJ36_V3.2190 | <i>L. infantum</i> | 120 | 159  | 278  |
| LinJ36_V3.2200 | <i>L. infantum</i> | 411 | 51   | 461  |
| LinJ36_V3.2200 | <i>L. infantum</i> | 193 | 514  | 706  |
| LinJ36_V3.2200 | <i>L. infantum</i> | 492 | 798  | 1289 |
| LinJ36_V3.2210 | <i>L. infantum</i> | 54  | 194  | 247  |
| LinJ36_V3.2210 | <i>L. infantum</i> | 251 | 362  | 612  |
| LinJ36_V3.2210 | <i>L. infantum</i> | 64  | 687  | 750  |
| LinJ36_V3.2220 | <i>L. infantum</i> | 76  | 73   | 148  |
| LinJ36_V3.2230 | <i>L. infantum</i> | 49  | 68   | 116  |
| LinJ36_V3.2230 | <i>L. infantum</i> | 49  | 224  | 272  |
| LinJ36_V3.2230 | <i>L. infantum</i> | 49  | 224  | 272  |
| LinJ36_V3.2240 | <i>L. infantum</i> | 99  | 1    | 99   |
| LinJ36_V3.2240 | <i>L. infantum</i> | 475 | 123  | 597  |
| LinJ36_V3.2240 | <i>L. infantum</i> | 96  | 610  | 705  |
| LinJ36_V3.2240 | <i>L. infantum</i> | 61  | 714  | 774  |
| LinJ36_V3.2250 | <i>L. infantum</i> | 128 | 1    | 128  |
| LinJ36_V3.2250 | <i>L. infantum</i> | 318 | 130  | 447  |
| LinJ36_V3.2250 | <i>L. infantum</i> | 455 | 452  | 906  |
| LinJ36_V3.2250 | <i>L. infantum</i> | 127 | 969  | 1095 |
| LinJ36_V3.2260 | <i>L. infantum</i> | 96  | 1    | 96   |
| LinJ36_V3.2260 | <i>L. infantum</i> | 84  | 488  | 571  |
| LinJ36_V3.2290 | <i>L. infantum</i> | 45  | 1    | 45   |
| LinJ36_V3.2300 | <i>L. infantum</i> | 79  | 479  | 557  |
| LinJ36_V3.2310 | <i>L. infantum</i> | 69  | 1    | 69   |
| LinJ36_V3.2310 | <i>L. infantum</i> | 76  | 126  | 201  |
| LinJ36_V3.2320 | <i>L. infantum</i> | 247 | 1    | 247  |
| LinJ36_V3.2320 | <i>L. infantum</i> | 62  | 273  | 334  |
| LinJ36_V3.2320 | <i>L. infantum</i> | 250 | 337  | 586  |
| LinJ36_V3.2330 | <i>L. infantum</i> | 80  | 53   | 132  |
| LinJ36_V3.2330 | <i>L. infantum</i> | 40  | 317  | 356  |
| LinJ36_V3.2330 | <i>L. infantum</i> | 48  | 456  | 503  |



|                |                    |     |      |      |
|----------------|--------------------|-----|------|------|
| LinJ36_V3.2330 | <i>L. infantum</i> | 131 | 513  | 643  |
| LinJ36_V3.2350 | <i>L. infantum</i> | 70  | 161  | 230  |
| LinJ36_V3.2350 | <i>L. infantum</i> | 134 | 242  | 375  |
| LinJ36_V3.2360 | <i>L. infantum</i> | 40  | 132  | 171  |
| LinJ36_V3.2370 | <i>L. infantum</i> | 59  | 1    | 59   |
| LinJ36_V3.2370 | <i>L. infantum</i> | 79  | 216  | 294  |
| LinJ36_V3.2370 | <i>L. infantum</i> | 75  | 315  | 389  |
| LinJ36_V3.2370 | <i>L. infantum</i> | 110 | 460  | 569  |
| LinJ36_V3.2370 | <i>L. infantum</i> | 73  | 792  | 864  |
| LinJ36_V3.2370 | <i>L. infantum</i> | 231 | 1082 | 1312 |
| LinJ36_V3.2370 | <i>L. infantum</i> | 166 | 1343 | 1508 |
| LinJ36_V3.2370 | <i>L. infantum</i> | 72  | 1547 | 1618 |
| LinJ36_V3.2370 | <i>L. infantum</i> | 111 | 1669 | 1779 |
| LinJ36_V3.2370 | <i>L. infantum</i> | 69  | 1973 | 2041 |
| LinJ36_V3.2370 | <i>L. infantum</i> | 323 | 2195 | 2517 |
| LinJ36_V3.2370 | <i>L. infantum</i> | 40  | 2539 | 2578 |
| LinJ36_V3.2390 | <i>L. infantum</i> | 63  | 175  | 237  |
| LinJ36_V3.2400 | <i>L. infantum</i> | 66  | 201  | 266  |
| LinJ36_V3.2410 | <i>L. infantum</i> | 53  | 1    | 53   |
| LinJ36_V3.2410 | <i>L. infantum</i> | 56  | 440  | 495  |
| LinJ36_V3.2410 | <i>L. infantum</i> | 56  | 440  | 495  |
| LinJ36_V3.2420 | <i>L. infantum</i> | 54  | 15   | 68   |
| LinJ36_V3.2420 | <i>L. infantum</i> | 41  | 118  | 158  |
| LinJ36_V3.2420 | <i>L. infantum</i> | 110 | 367  | 476  |
| LinJ36_V3.2430 | <i>L. infantum</i> | 59  | 315  | 373  |
| LinJ36_V3.2430 | <i>L. infantum</i> | 104 | 379  | 482  |
| LinJ36_V3.2440 | <i>L. infantum</i> | 58  | 268  | 325  |
| LinJ36_V3.2460 | <i>L. infantum</i> | 55  | 1    | 55   |
| LinJ36_V3.2470 | <i>L. infantum</i> | 112 | 238  | 349  |
| LinJ36_V3.2490 | <i>L. infantum</i> | 88  | 1    | 88   |
| LinJ36_V3.2500 | <i>L. infantum</i> | 82  | 1    | 82   |
| LinJ36_V3.2500 | <i>L. infantum</i> | 40  | 170  | 209  |
| LinJ36_V3.2500 | <i>L. infantum</i> | 48  | 217  | 264  |
| LinJ36_V3.2500 | <i>L. infantum</i> | 76  | 349  | 424  |
| LinJ36_V3.2500 | <i>L. infantum</i> | 55  | 465  | 519  |
| LinJ36_V3.2500 | <i>L. infantum</i> | 87  | 727  | 813  |
| LinJ36_V3.2510 | <i>L. infantum</i> | 47  | 1    | 47   |
| LinJ36_V3.2520 | <i>L. infantum</i> | 47  | 1    | 47   |
| LinJ36_V3.2540 | <i>L. infantum</i> | 41  | 120  | 160  |
| LinJ36_V3.2540 | <i>L. infantum</i> | 110 | 276  | 385  |
| LinJ36_V3.2540 | <i>L. infantum</i> | 115 | 423  | 537  |
| LinJ36_V3.2540 | <i>L. infantum</i> | 43  | 674  | 716  |
| LinJ36_V3.2540 | <i>L. infantum</i> | 270 | 741  | 1010 |
| LinJ36_V3.2540 | <i>L. infantum</i> | 41  | 1070 | 1110 |
| LinJ36_V3.2540 | <i>L. infantum</i> | 57  | 1328 | 1384 |
| LinJ36_V3.2540 | <i>L. infantum</i> | 71  | 1461 | 1531 |
| LinJ36_V3.2540 | <i>L. infantum</i> | 105 | 1543 | 1647 |

|                |                    |     |      |      |
|----------------|--------------------|-----|------|------|
| LinJ36_V3.2540 | <i>L. infantum</i> | 106 | 1752 | 1857 |
| LinJ36_V3.2560 | <i>L. infantum</i> | 116 | 29   | 144  |
| LinJ36_V3.2570 | <i>L. infantum</i> | 181 | 41   | 221  |
| LinJ36_V3.2580 | <i>L. infantum</i> | 91  | 219  | 309  |
| LinJ36_V3.2590 | <i>L. infantum</i> | 65  | 263  | 327  |
| LinJ36_V3.2610 | <i>L. infantum</i> | 178 | 81   | 258  |
| LinJ36_V3.2620 | <i>L. infantum</i> | 209 | 1    | 209  |
| LinJ36_V3.2630 | <i>L. infantum</i> | 79  | 573  | 651  |
| LinJ36_V3.2640 | <i>L. infantum</i> | 103 | 1    | 103  |
| LinJ36_V3.2640 | <i>L. infantum</i> | 50  | 214  | 263  |
| LinJ36_V3.2640 | <i>L. infantum</i> | 46  | 701  | 746  |
| LinJ36_V3.2650 | <i>L. infantum</i> | 143 | 106  | 248  |
| LinJ36_V3.2650 | <i>L. infantum</i> | 43  | 308  | 350  |
| LinJ36_V3.2650 | <i>L. infantum</i> | 43  | 308  | 350  |
| LinJ36_V3.2660 | <i>L. infantum</i> | 47  | 315  | 361  |
| LinJ36_V3.2660 | <i>L. infantum</i> | 46  | 553  | 598  |
| LinJ36_V3.2660 | <i>L. infantum</i> | 46  | 553  | 598  |
| LinJ36_V3.2680 | <i>L. infantum</i> | 42  | 1    | 42   |
| LinJ36_V3.2680 | <i>L. infantum</i> | 70  | 85   | 154  |
| LinJ36_V3.2680 | <i>L. infantum</i> | 65  | 272  | 336  |
| LinJ36_V3.2690 | <i>L. infantum</i> | 50  | 127  | 176  |
| LinJ36_V3.2710 | <i>L. infantum</i> | 58  | 233  | 290  |
| LinJ36_V3.2710 | <i>L. infantum</i> | 71  | 369  | 439  |
| LinJ36_V3.2710 | <i>L. infantum</i> | 41  | 726  | 766  |
| LinJ36_V3.2710 | <i>L. infantum</i> | 43  | 893  | 935  |
| LinJ36_V3.2730 | <i>L. infantum</i> | 42  | 1    | 42   |
| LinJ36_V3.2730 | <i>L. infantum</i> | 71  | 172  | 242  |
| LinJ36_V3.2730 | <i>L. infantum</i> | 74  | 537  | 610  |
| LinJ36_V3.2740 | <i>L. infantum</i> | 89  | 1    | 89   |
| LinJ36_V3.2750 | <i>L. infantum</i> | 196 | 1    | 196  |
| LinJ36_V3.2750 | <i>L. infantum</i> | 43  | 364  | 406  |
| LinJ36_V3.2750 | <i>L. infantum</i> | 49  | 463  | 511  |
| LinJ36_V3.2750 | <i>L. infantum</i> | 67  | 568  | 634  |
| LinJ36_V3.2750 | <i>L. infantum</i> | 61  | 704  | 764  |
| LinJ36_V3.2750 | <i>L. infantum</i> | 52  | 778  | 829  |
| LinJ36_V3.2750 | <i>L. infantum</i> | 54  | 905  | 958  |
| LinJ36_V3.2750 | <i>L. infantum</i> | 52  | 1123 | 1174 |
| LinJ36_V3.2750 | <i>L. infantum</i> | 45  | 1246 | 1290 |
| LinJ36_V3.2750 | <i>L. infantum</i> | 43  | 1301 | 1343 |
| LinJ36_V3.2750 | <i>L. infantum</i> | 137 | 1460 | 1596 |
| LinJ36_V3.2760 | <i>L. infantum</i> | 95  | 1    | 95   |
| LinJ36_V3.2760 | <i>L. infantum</i> | 169 | 101  | 269  |
| LinJ36_V3.2760 | <i>L. infantum</i> | 140 | 296  | 435  |
| LinJ36_V3.2760 | <i>L. infantum</i> | 85  | 466  | 550  |
| LinJ36_V3.2760 | <i>L. infantum</i> | 52  | 623  | 674  |
| LinJ36_V3.2760 | <i>L. infantum</i> | 109 | 725  | 833  |
| LinJ36_V3.2760 | <i>L. infantum</i> | 111 | 845  | 955  |

|                |                    |     |      |      |
|----------------|--------------------|-----|------|------|
| LinJ36_V3.2760 | <i>L. infantum</i> | 116 | 1004 | 1119 |
| LinJ36_V3.2760 | <i>L. infantum</i> | 75  | 1164 | 1238 |
| LinJ36_V3.2760 | <i>L. infantum</i> | 54  | 1302 | 1355 |
| LinJ36_V3.2760 | <i>L. infantum</i> | 50  | 1492 | 1541 |
| LinJ36_V3.2760 | <i>L. infantum</i> | 51  | 1702 | 1752 |
| LinJ36_V3.2760 | <i>L. infantum</i> | 103 | 1790 | 1892 |
| LinJ36_V3.2760 | <i>L. infantum</i> | 65  | 1990 | 2054 |
| LinJ36_V3.2760 | <i>L. infantum</i> | 418 | 2107 | 2524 |
| LinJ36_V3.2760 | <i>L. infantum</i> | 128 | 2566 | 2693 |
| LinJ36_V3.2760 | <i>L. infantum</i> | 54  | 2733 | 2786 |
| LinJ36_V3.2760 | <i>L. infantum</i> | 68  | 2818 | 2885 |
| LinJ36_V3.2760 | <i>L. infantum</i> | 71  | 2916 | 2986 |
| LinJ36_V3.2760 | <i>L. infantum</i> | 59  | 3248 | 3306 |
| LinJ36_V3.2760 | <i>L. infantum</i> | 66  | 3350 | 3415 |
| LinJ36_V3.2780 | <i>L. infantum</i> | 55  | 149  | 203  |
| LinJ36_V3.2790 | <i>L. infantum</i> | 129 | 100  | 228  |
| LinJ36_V3.2800 | <i>L. infantum</i> | 58  | 25   | 82   |
| LinJ36_V3.2800 | <i>L. infantum</i> | 83  | 194  | 276  |
| LinJ36_V3.2800 | <i>L. infantum</i> | 83  | 194  | 276  |
| LinJ36_V3.2820 | <i>L. infantum</i> | 92  | 58   | 149  |
| LinJ36_V3.2830 | <i>L. infantum</i> | 62  | 42   | 103  |
| LinJ36_V3.2830 | <i>L. infantum</i> | 43  | 154  | 196  |
| LinJ36_V3.2830 | <i>L. infantum</i> | 47  | 211  | 257  |
| LinJ36_V3.2830 | <i>L. infantum</i> | 61  | 279  | 339  |
| LinJ36_V3.2840 | <i>L. infantum</i> | 146 | 1    | 146  |
| LinJ36_V3.2840 | <i>L. infantum</i> | 266 | 387  | 652  |
| LinJ36_V3.2840 | <i>L. infantum</i> | 56  | 1387 | 1442 |
| LinJ36_V3.2850 | <i>L. infantum</i> | 53  | 519  | 571  |
| LinJ36_V3.2880 | <i>L. infantum</i> | 44  | 976  | 1019 |
| LinJ36_V3.2900 | <i>L. infantum</i> | 49  | 310  | 358  |
| LinJ36_V3.2910 | <i>L. infantum</i> | 607 | 1    | 607  |
| LinJ36_V3.2920 | <i>L. infantum</i> | 56  | 1    | 56   |
| LinJ36_V3.2930 | <i>L. infantum</i> | 52  | 489  | 540  |
| LinJ36_V3.2930 | <i>L. infantum</i> | 43  | 1334 | 1376 |
| LinJ36_V3.2930 | <i>L. infantum</i> | 75  | 2078 | 2152 |
| LinJ36_V3.2930 | <i>L. infantum</i> | 57  | 2536 | 2592 |
| LinJ36_V3.2940 | <i>L. infantum</i> | 54  | 26   | 79   |
| LinJ36_V3.2940 | <i>L. infantum</i> | 305 | 109  | 413  |
| LinJ36_V3.2940 | <i>L. infantum</i> | 116 | 497  | 612  |
| LinJ36_V3.2950 | <i>L. infantum</i> | 64  | 92   | 155  |
| LinJ36_V3.2950 | <i>L. infantum</i> | 95  | 330  | 424  |
| LinJ36_V3.2950 | <i>L. infantum</i> | 68  | 520  | 587  |
| LinJ36_V3.2960 | <i>L. infantum</i> | 191 | 401  | 591  |
| LinJ36_V3.2970 | <i>L. infantum</i> | 57  | 46   | 102  |
| LinJ36_V3.2970 | <i>L. infantum</i> | 254 | 155  | 408  |
| LinJ36_V3.2980 | <i>L. infantum</i> | 134 | 42   | 175  |
| LinJ36_V3.2980 | <i>L. infantum</i> | 40  | 658  | 697  |

|                |                    |     |      |      |
|----------------|--------------------|-----|------|------|
| LinJ36_V3.3010 | <i>L. infantum</i> | 45  | 93   | 137  |
| LinJ36_V3.3020 | <i>L. infantum</i> | 45  | 93   | 137  |
| LinJ36_V3.3030 | <i>L. infantum</i> | 61  | 469  | 529  |
| LinJ36_V3.3030 | <i>L. infantum</i> | 59  | 1523 | 1581 |
| LinJ36_V3.3030 | <i>L. infantum</i> | 46  | 1672 | 1717 |
| LinJ36_V3.3040 | <i>L. infantum</i> | 62  | 1    | 62   |
| LinJ36_V3.3040 | <i>L. infantum</i> | 84  | 311  | 394  |
| LinJ36_V3.3050 | <i>L. infantum</i> | 84  | 157  | 240  |
| LinJ36_V3.3050 | <i>L. infantum</i> | 68  | 276  | 343  |
| LinJ36_V3.3050 | <i>L. infantum</i> | 85  | 479  | 563  |
| LinJ36_V3.3060 | <i>L. infantum</i> | 58  | 19   | 76   |
| LinJ36_V3.3060 | <i>L. infantum</i> | 49  | 298  | 346  |
| LinJ36_V3.3080 | <i>L. infantum</i> | 203 | 346  | 548  |
| LinJ36_V3.3090 | <i>L. infantum</i> | 73  | 524  | 596  |
| LinJ36_V3.3090 | <i>L. infantum</i> | 104 | 2616 | 2719 |
| LinJ36_V3.3090 | <i>L. infantum</i> | 69  | 2721 | 2789 |
| LinJ36_V3.3090 | <i>L. infantum</i> | 65  | 3282 | 3346 |
| LinJ36_V3.3090 | <i>L. infantum</i> | 102 | 3684 | 3785 |
| LinJ36_V3.3130 | <i>L. infantum</i> | 125 | 112  | 236  |
| LinJ36_V3.3140 | <i>L. infantum</i> | 40  | 366  | 405  |
| LinJ36_V3.3150 | <i>L. infantum</i> | 44  | 236  | 279  |
| LinJ36_V3.3150 | <i>L. infantum</i> | 66  | 689  | 754  |
| LinJ36_V3.3150 | <i>L. infantum</i> | 66  | 689  | 754  |
| LinJ36_V3.3180 | <i>L. infantum</i> | 40  | 285  | 324  |
| LinJ36_V3.3190 | <i>L. infantum</i> | 46  | 137  | 182  |
| LinJ36_V3.3240 | <i>L. infantum</i> | 339 | 194  | 532  |
| LinJ36_V3.3240 | <i>L. infantum</i> | 43  | 782  | 824  |
| LinJ36_V3.3250 | <i>L. infantum</i> | 99  | 1    | 99   |
| LinJ36_V3.3260 | <i>L. infantum</i> | 42  | 201  | 242  |
| LinJ36_V3.3290 | <i>L. infantum</i> | 41  | 21   | 61   |
| LinJ36_V3.3290 | <i>L. infantum</i> | 70  | 75   | 144  |
| LinJ36_V3.3290 | <i>L. infantum</i> | 70  | 75   | 144  |
| LinJ36_V3.3300 | <i>L. infantum</i> | 347 | 121  | 467  |
| LinJ36_V3.3310 | <i>L. infantum</i> | 60  | 1    | 60   |
| LinJ36_V3.3310 | <i>L. infantum</i> | 66  | 89   | 154  |
| LinJ36_V3.3310 | <i>L. infantum</i> | 66  | 89   | 154  |
| LinJ36_V3.3330 | <i>L. infantum</i> | 84  | 1180 | 1263 |
| LinJ36_V3.3340 | <i>L. infantum</i> | 99  | 1    | 99   |
| LinJ36_V3.3340 | <i>L. infantum</i> | 70  | 139  | 208  |
| LinJ36_V3.3340 | <i>L. infantum</i> | 85  | 246  | 330  |
| LinJ36_V3.3350 | <i>L. infantum</i> | 84  | 847  | 930  |
| LinJ36_V3.3370 | <i>L. infantum</i> | 467 | 26   | 492  |
| LinJ36_V3.3400 | <i>L. infantum</i> | 80  | 477  | 556  |
| LinJ36_V3.3410 | <i>L. infantum</i> | 89  | 131  | 219  |
| LinJ36_V3.3420 | <i>L. infantum</i> | 61  | 95   | 155  |
| LinJ36_V3.3440 | <i>L. infantum</i> | 46  | 1    | 46   |
| LinJ36_V3.3440 | <i>L. infantum</i> | 43  | 133  | 175  |

|                |                    |     |      |      |
|----------------|--------------------|-----|------|------|
| LinJ36_V3.3440 | <i>L. infantum</i> | 56  | 206  | 261  |
| LinJ36_V3.3440 | <i>L. infantum</i> | 65  | 1106 | 1170 |
| LinJ36_V3.3490 | <i>L. infantum</i> | 144 | 187  | 330  |
| LinJ36_V3.3500 | <i>L. infantum</i> | 59  | 322  | 380  |
| LinJ36_V3.3500 | <i>L. infantum</i> | 52  | 1201 | 1252 |
| LinJ36_V3.3500 | <i>L. infantum</i> | 47  | 1266 | 1312 |
| LinJ36_V3.3500 | <i>L. infantum</i> | 85  | 1485 | 1569 |
| LinJ36_V3.3500 | <i>L. infantum</i> | 44  | 1765 | 1808 |
| LinJ36_V3.3500 | <i>L. infantum</i> | 51  | 2217 | 2267 |
| LinJ36_V3.3510 | <i>L. infantum</i> | 49  | 43   | 91   |
| LinJ36_V3.3590 | <i>L. infantum</i> | 74  | 294  | 367  |
| LinJ36_V3.3590 | <i>L. infantum</i> | 80  | 390  | 469  |
| LinJ36_V3.3590 | <i>L. infantum</i> | 102 | 632  | 733  |
| LinJ36_V3.3600 | <i>L. infantum</i> | 217 | 1    | 217  |
| LinJ36_V3.3640 | <i>L. infantum</i> | 158 | 52   | 209  |
| LinJ36_V3.3650 | <i>L. infantum</i> | 110 | 230  | 339  |
| LinJ36_V3.3660 | <i>L. infantum</i> | 149 | 1    | 149  |
| LinJ36_V3.3660 | <i>L. infantum</i> | 245 | 152  | 396  |
| LinJ36_V3.3670 | <i>L. infantum</i> | 46  | 144  | 189  |
| LinJ36_V3.3680 | <i>L. infantum</i> | 66  | 1    | 66   |
| LinJ36_V3.3700 | <i>L. infantum</i> | 59  | 43   | 101  |
| LinJ36_V3.3700 | <i>L. infantum</i> | 45  | 191  | 235  |
| LinJ36_V3.3700 | <i>L. infantum</i> | 40  | 332  | 371  |
| LinJ36_V3.3710 | <i>L. infantum</i> | 251 | 228  | 478  |
| LinJ36_V3.3710 | <i>L. infantum</i> | 83  | 482  | 564  |
| LinJ36_V3.3710 | <i>L. infantum</i> | 447 | 567  | 1013 |
| LinJ36_V3.3710 | <i>L. infantum</i> | 48  | 1039 | 1086 |
| LinJ36_V3.3730 | <i>L. infantum</i> | 175 | 103  | 277  |
| LinJ36_V3.3790 | <i>L. infantum</i> | 96  | 112  | 207  |
| LinJ36_V3.3850 | <i>L. infantum</i> | 96  | 245  | 340  |
| LinJ36_V3.3870 | <i>L. infantum</i> | 48  | 640  | 687  |
| LinJ36_V3.3880 | <i>L. infantum</i> | 41  | 1    | 41   |
| LinJ36_V3.3910 | <i>L. infantum</i> | 49  | 26   | 74   |
| LinJ36_V3.3910 | <i>L. infantum</i> | 108 | 148  | 255  |
| LinJ36_V3.3910 | <i>L. infantum</i> | 41  | 546  | 586  |
| LinJ36_V3.3930 | <i>L. infantum</i> | 51  | 1    | 51   |
| LinJ36_V3.3930 | <i>L. infantum</i> | 71  | 98   | 168  |
| LinJ36_V3.3960 | <i>L. infantum</i> | 41  | 1    | 41   |
| LinJ36_V3.3980 | <i>L. infantum</i> | 88  | 142  | 229  |
| LinJ36_V3.3980 | <i>L. infantum</i> | 118 | 233  | 350  |
| LinJ36_V3.3980 | <i>L. infantum</i> | 66  | 489  | 554  |
| LinJ36_V3.3980 | <i>L. infantum</i> | 91  | 569  | 659  |
| LinJ36_V3.3980 | <i>L. infantum</i> | 275 | 693  | 967  |
| LinJ36_V3.4010 | <i>L. infantum</i> | 56  | 1    | 56   |
| LinJ36_V3.4010 | <i>L. infantum</i> | 40  | 70   | 109  |
| LinJ36_V3.4010 | <i>L. infantum</i> | 40  | 70   | 109  |
| LinJ36_V3.4020 | <i>L. infantum</i> | 76  | 186  | 261  |

|                |                    |     |      |      |
|----------------|--------------------|-----|------|------|
| LinJ36_V3.4040 | <i>L. infantum</i> | 225 | 1    | 225  |
| LinJ36_V3.4050 | <i>L. infantum</i> | 64  | 217  | 280  |
| LinJ36_V3.4060 | <i>L. infantum</i> | 103 | 55   | 157  |
| LinJ36_V3.4060 | <i>L. infantum</i> | 96  | 412  | 507  |
| LinJ36_V3.4060 | <i>L. infantum</i> | 129 | 554  | 682  |
| LinJ36_V3.4060 | <i>L. infantum</i> | 77  | 686  | 762  |
| LinJ36_V3.4080 | <i>L. infantum</i> | 115 | 89   | 203  |
| LinJ36_V3.4090 | <i>L. infantum</i> | 108 | 124  | 231  |
| LinJ36_V3.4120 | <i>L. infantum</i> | 96  | 61   | 156  |
| LinJ36_V3.4120 | <i>L. infantum</i> | 126 | 227  | 352  |
| LinJ36_V3.4120 | <i>L. infantum</i> | 65  | 656  | 720  |
| LinJ36_V3.4120 | <i>L. infantum</i> | 40  | 751  | 790  |
| LinJ36_V3.4120 | <i>L. infantum</i> | 120 | 803  | 922  |
| LinJ36_V3.4120 | <i>L. infantum</i> | 60  | 1317 | 1376 |
| LinJ36_V3.4120 | <i>L. infantum</i> | 54  | 1398 | 1451 |
| LinJ36_V3.4130 | <i>L. infantum</i> | 109 | 1    | 109  |
| LinJ36_V3.4130 | <i>L. infantum</i> | 87  | 166  | 252  |
| LinJ36_V3.4130 | <i>L. infantum</i> | 164 | 268  | 431  |
| LinJ36_V3.4130 | <i>L. infantum</i> | 166 | 508  | 673  |
| LinJ36_V3.4130 | <i>L. infantum</i> | 40  | 689  | 728  |
| LinJ36_V3.4130 | <i>L. infantum</i> | 98  | 757  | 854  |
| LinJ36_V3.4130 | <i>L. infantum</i> | 141 | 870  | 1010 |
| LinJ36_V3.4140 | <i>L. infantum</i> | 78  | 1    | 78   |
| LinJ36_V3.4140 | <i>L. infantum</i> | 67  | 87   | 153  |
| LinJ36_V3.4140 | <i>L. infantum</i> | 67  | 87   | 153  |
| LinJ36_V3.4150 | <i>L. infantum</i> | 203 | 1    | 203  |
| LinJ36_V3.4150 | <i>L. infantum</i> | 317 | 296  | 612  |
| LinJ36_V3.4150 | <i>L. infantum</i> | 46  | 647  | 692  |
| LinJ36_V3.4150 | <i>L. infantum</i> | 122 | 704  | 825  |
| LinJ36_V3.4150 | <i>L. infantum</i> | 113 | 899  | 1011 |
| LinJ36_V3.4160 | <i>L. infantum</i> | 124 | 26   | 149  |
| LinJ36_V3.4160 | <i>L. infantum</i> | 59  | 255  | 313  |
| LinJ36_V3.4160 | <i>L. infantum</i> | 44  | 435  | 478  |
| LinJ36_V3.4160 | <i>L. infantum</i> | 249 | 763  | 1011 |
| LinJ36_V3.4170 | <i>L. infantum</i> | 63  | 1    | 63   |
| LinJ36_V3.4170 | <i>L. infantum</i> | 84  | 85   | 168  |
| LinJ36_V3.4190 | <i>L. infantum</i> | 109 | 1    | 109  |
| LinJ36_V3.4190 | <i>L. infantum</i> | 68  | 406  | 473  |
| LinJ36_V3.4190 | <i>L. infantum</i> | 116 | 484  | 599  |
| LinJ36_V3.4190 | <i>L. infantum</i> | 63  | 677  | 739  |
| LinJ36_V3.4210 | <i>L. infantum</i> | 82  | 172  | 253  |
| LinJ36_V3.4210 | <i>L. infantum</i> | 115 | 315  | 429  |
| LinJ36_V3.4220 | <i>L. infantum</i> | 149 | 40   | 188  |
| LinJ36_V3.4230 | <i>L. infantum</i> | 303 | 1    | 303  |
| LinJ36_V3.4230 | <i>L. infantum</i> | 308 | 311  | 618  |
| LinJ36_V3.4230 | <i>L. infantum</i> | 85  | 661  | 745  |
| LinJ36_V3.4230 | <i>L. infantum</i> | 70  | 1073 | 1142 |

|                |                    |     |      |      |
|----------------|--------------------|-----|------|------|
| LinJ36_V3.4230 | <i>L. infantum</i> | 107 | 1364 | 1470 |
| LinJ36_V3.4240 | <i>L. infantum</i> | 94  | 1    | 94   |
| LinJ36_V3.4240 | <i>L. infantum</i> | 120 | 311  | 430  |
| LinJ36_V3.4250 | <i>L. infantum</i> | 57  | 111  | 167  |
| LinJ36_V3.4250 | <i>L. infantum</i> | 50  | 244  | 293  |
| LinJ36_V3.4250 | <i>L. infantum</i> | 50  | 244  | 293  |
| LinJ36_V3.4260 | <i>L. infantum</i> | 67  | 1    | 67   |
| LinJ36_V3.4260 | <i>L. infantum</i> | 78  | 576  | 653  |
| LinJ36_V3.4260 | <i>L. infantum</i> | 78  | 576  | 653  |
| LinJ36_V3.4270 | <i>L. infantum</i> | 41  | 141  | 181  |
| LinJ36_V3.4280 | <i>L. infantum</i> | 269 | 200  | 468  |
| LinJ36_V3.4290 | <i>L. infantum</i> | 69  | 26   | 94   |
| LinJ36_V3.4290 | <i>L. infantum</i> | 243 | 175  | 417  |
| LinJ36_V3.4300 | <i>L. infantum</i> | 53  | 48   | 100  |
| LinJ36_V3.4300 | <i>L. infantum</i> | 115 | 283  | 397  |
| LinJ36_V3.4300 | <i>L. infantum</i> | 42  | 875  | 916  |
| LinJ36_V3.4300 | <i>L. infantum</i> | 73  | 1275 | 1347 |
| LinJ36_V3.4300 | <i>L. infantum</i> | 54  | 1367 | 1420 |
| LinJ36_V3.4310 | <i>L. infantum</i> | 67  | 1    | 67   |
| LinJ36_V3.4310 | <i>L. infantum</i> | 47  | 78   | 124  |
| LinJ36_V3.4310 | <i>L. infantum</i> | 42  | 360  | 401  |
| LinJ36_V3.4310 | <i>L. infantum</i> | 43  | 559  | 601  |
| LinJ36_V3.4310 | <i>L. infantum</i> | 55  | 687  | 741  |
| LinJ36_V3.4310 | <i>L. infantum</i> | 72  | 836  | 907  |
| LinJ36_V3.4320 | <i>L. infantum</i> | 44  | 1    | 44   |
| LinJ36_V3.4360 | <i>L. infantum</i> | 45  | 82   | 126  |
| LinJ36_V3.4360 | <i>L. infantum</i> | 57  | 317  | 373  |
| LinJ36_V3.4360 | <i>L. infantum</i> | 85  | 393  | 477  |
| LinJ36_V3.4360 | <i>L. infantum</i> | 105 | 512  | 616  |
| LinJ36_V3.4370 | <i>L. infantum</i> | 326 | 1    | 326  |
| LinJ36_V3.4400 | <i>L. infantum</i> | 124 | 219  | 342  |
| LinJ36_V3.4410 | <i>L. infantum</i> | 44  | 222  | 265  |
| LinJ36_V3.4410 | <i>L. infantum</i> | 239 | 275  | 513  |
| LinJ36_V3.4410 | <i>L. infantum</i> | 76  | 671  | 746  |
| LinJ36_V3.4420 | <i>L. infantum</i> | 68  | 696  | 763  |
| LinJ36_V3.4430 | <i>L. infantum</i> | 67  | 1    | 67   |
| LinJ36_V3.4430 | <i>L. infantum</i> | 240 | 178  | 417  |
| LinJ36_V3.4430 | <i>L. infantum</i> | 56  | 497  | 552  |
| LinJ36_V3.4460 | <i>L. infantum</i> | 58  | 141  | 198  |
| LinJ36_V3.4460 | <i>L. infantum</i> | 97  | 222  | 318  |
| LinJ36_V3.4470 | <i>L. infantum</i> | 146 | 1    | 146  |
| LinJ36_V3.4470 | <i>L. infantum</i> | 167 | 176  | 342  |
| LinJ36_V3.4480 | <i>L. infantum</i> | 81  | 1    | 81   |
| LinJ36_V3.4480 | <i>L. infantum</i> | 68  | 302  | 369  |
| LinJ36_V3.4480 | <i>L. infantum</i> | 92  | 1262 | 1353 |
| LinJ36_V3.4480 | <i>L. infantum</i> | 49  | 1535 | 1583 |
| LinJ36_V3.4490 | <i>L. infantum</i> | 43  | 382  | 424  |

|                |                    |     |      |      |
|----------------|--------------------|-----|------|------|
| LinJ36_V3.4500 | <i>L. infantum</i> | 87  | 342  | 428  |
| LinJ36_V3.4500 | <i>L. infantum</i> | 148 | 841  | 988  |
| LinJ36_V3.4500 | <i>L. infantum</i> | 66  | 1166 | 1231 |
| LinJ36_V3.4510 | <i>L. infantum</i> | 43  | 395  | 437  |
| LinJ36_V3.4530 | <i>L. infantum</i> | 79  | 165  | 243  |
| LinJ36_V3.4530 | <i>L. infantum</i> | 148 | 268  | 415  |
| LinJ36_V3.4530 | <i>L. infantum</i> | 52  | 945  | 996  |
| LinJ36_V3.4530 | <i>L. infantum</i> | 48  | 1018 | 1065 |
| LinJ36_V3.4530 | <i>L. infantum</i> | 55  | 1086 | 1140 |
| LinJ36_V3.4530 | <i>L. infantum</i> | 76  | 1667 | 1742 |
| LinJ36_V3.4530 | <i>L. infantum</i> | 47  | 2147 | 2193 |
| LinJ36_V3.4540 | <i>L. infantum</i> | 248 | 1    | 248  |
| LinJ36_V3.4540 | <i>L. infantum</i> | 40  | 787  | 826  |
| LinJ36_V3.4540 | <i>L. infantum</i> | 71  | 936  | 1006 |
| LinJ36_V3.4540 | <i>L. infantum</i> | 171 | 1200 | 1370 |
| LinJ36_V3.4540 | <i>L. infantum</i> | 81  | 1545 | 1625 |
| LinJ36_V3.4550 | <i>L. infantum</i> | 293 | 1    | 293  |
| LinJ36_V3.4550 | <i>L. infantum</i> | 236 | 299  | 534  |
| LinJ36_V3.4560 | <i>L. infantum</i> | 59  | 1    | 59   |
| LinJ36_V3.4560 | <i>L. infantum</i> | 180 | 64   | 243  |
| LinJ36_V3.4560 | <i>L. infantum</i> | 106 | 411  | 516  |
| LinJ36_V3.4560 | <i>L. infantum</i> | 108 | 581  | 688  |
| LinJ36_V3.4560 | <i>L. infantum</i> | 58  | 726  | 783  |
| LinJ36_V3.4560 | <i>L. infantum</i> | 92  | 798  | 889  |
| LinJ36_V3.4570 | <i>L. infantum</i> | 48  | 33   | 80   |
| LinJ36_V3.4580 | <i>L. infantum</i> | 50  | 281  | 330  |
| LinJ36_V3.4580 | <i>L. infantum</i> | 73  | 444  | 516  |
| LinJ36_V3.4600 | <i>L. infantum</i> | 72  | 11   | 82   |
| LinJ36_V3.4600 | <i>L. infantum</i> | 75  | 162  | 236  |
| LinJ36_V3.4600 | <i>L. infantum</i> | 92  | 347  | 438  |
| LinJ36_V3.4610 | <i>L. infantum</i> | 68  | 58   | 125  |
| LinJ36_V3.4610 | <i>L. infantum</i> | 60  | 358  | 417  |
| LinJ36_V3.4610 | <i>L. infantum</i> | 44  | 604  | 647  |
| LinJ36_V3.4620 | <i>L. infantum</i> | 183 | 1    | 183  |
| LinJ36_V3.4620 | <i>L. infantum</i> | 40  | 224  | 263  |
| LinJ36_V3.4620 | <i>L. infantum</i> | 41  | 291  | 331  |
| LinJ36_V3.4620 | <i>L. infantum</i> | 164 | 451  | 614  |
| LinJ36_V3.4630 | <i>L. infantum</i> | 130 | 65   | 194  |
| LinJ36_V3.4670 | <i>L. infantum</i> | 44  | 22   | 65   |
| LinJ36_V3.4670 | <i>L. infantum</i> | 40  | 152  | 191  |
| LinJ36_V3.4670 | <i>L. infantum</i> | 40  | 152  | 191  |
| LinJ36_V3.4680 | <i>L. infantum</i> | 42  | 119  | 160  |
| LinJ36_V3.4690 | <i>L. infantum</i> | 113 | 163  | 275  |
| LinJ36_V3.4700 | <i>L. infantum</i> | 134 | 130  | 263  |
| LinJ36_V3.4700 | <i>L. infantum</i> | 129 | 518  | 646  |
| LinJ36_V3.4710 | <i>L. infantum</i> | 92  | 1    | 92   |
| LinJ36_V3.4710 | <i>L. infantum</i> | 40  | 122  | 161  |



|                |                    |     |      |      |
|----------------|--------------------|-----|------|------|
| LinJ36_V3.4710 | <i>L. infantum</i> | 44  | 343  | 386  |
| LinJ36_V3.4730 | <i>L. infantum</i> | 51  | 148  | 198  |
| LinJ36_V3.4740 | <i>L. infantum</i> | 74  | 379  | 452  |
| LinJ36_V3.4740 | <i>L. infantum</i> | 72  | 556  | 627  |
| LinJ36_V3.4750 | <i>L. infantum</i> | 100 | 1    | 100  |
| LinJ36_V3.4760 | <i>L. infantum</i> | 47  | 1    | 47   |
| LinJ36_V3.4760 | <i>L. infantum</i> | 42  | 328  | 369  |
| LinJ36_V3.4770 | <i>L. infantum</i> | 58  | 1    | 58   |
| LinJ36_V3.4770 | <i>L. infantum</i> | 112 | 731  | 842  |
| LinJ36_V3.4780 | <i>L. infantum</i> | 53  | 283  | 335  |
| LinJ36_V3.4800 | <i>L. infantum</i> | 81  | 10   | 90   |
| LinJ36_V3.4810 | <i>L. infantum</i> | 115 | 1    | 115  |
| LinJ36_V3.4810 | <i>L. infantum</i> | 45  | 320  | 364  |
| LinJ36_V3.4820 | <i>L. infantum</i> | 165 | 47   | 211  |
| LinJ36_V3.4820 | <i>L. infantum</i> | 64  | 376  | 439  |
| LinJ36_V3.4820 | <i>L. infantum</i> | 61  | 483  | 543  |
| LinJ36_V3.4840 | <i>L. infantum</i> | 53  | 1    | 53   |
| LinJ36_V3.4840 | <i>L. infantum</i> | 70  | 90   | 159  |
| LinJ36_V3.4840 | <i>L. infantum</i> | 81  | 215  | 295  |
| LinJ36_V3.4840 | <i>L. infantum</i> | 68  | 350  | 417  |
| LinJ36_V3.4850 | <i>L. infantum</i> | 68  | 46   | 113  |
| LinJ36_V3.4850 | <i>L. infantum</i> | 58  | 407  | 464  |
| LinJ36_V3.4850 | <i>L. infantum</i> | 56  | 720  | 775  |
| LinJ36_V3.4850 | <i>L. infantum</i> | 44  | 1197 | 1240 |
| LinJ36_V3.4870 | <i>L. infantum</i> | 117 | 416  | 532  |
| LinJ36_V3.4890 | <i>L. infantum</i> | 47  | 63   | 109  |
| LinJ36_V3.4890 | <i>L. infantum</i> | 145 | 264  | 408  |
| LinJ36_V3.4890 | <i>L. infantum</i> | 100 | 690  | 789  |
| LinJ36_V3.4890 | <i>L. infantum</i> | 92  | 804  | 895  |
| LinJ36_V3.4900 | <i>L. infantum</i> | 112 | 1    | 112  |
| LinJ36_V3.4920 | <i>L. infantum</i> | 61  | 1    | 61   |
| LinJ36_V3.4920 | <i>L. infantum</i> | 51  | 193  | 243  |
| LinJ36_V3.4920 | <i>L. infantum</i> | 739 | 648  | 1386 |
| LinJ36_V3.4920 | <i>L. infantum</i> | 207 | 1402 | 1608 |
| LinJ36_V3.4920 | <i>L. infantum</i> | 217 | 1612 | 1828 |
| LinJ36_V3.4930 | <i>L. infantum</i> | 72  | 56   | 127  |
| LinJ36_V3.4930 | <i>L. infantum</i> | 109 | 270  | 378  |
| LinJ36_V3.4930 | <i>L. infantum</i> | 87  | 533  | 619  |
| LinJ36_V3.4930 | <i>L. infantum</i> | 48  | 754  | 801  |
| LinJ36_V3.4930 | <i>L. infantum</i> | 51  | 837  | 887  |
| LinJ36_V3.4940 | <i>L. infantum</i> | 51  | 141  | 191  |
| LinJ36_V3.4940 | <i>L. infantum</i> | 89  | 444  | 532  |
| LinJ36_V3.4940 | <i>L. infantum</i> | 177 | 537  | 713  |
| LinJ36_V3.4950 | <i>L. infantum</i> | 96  | 672  | 767  |
| LinJ36_V3.4950 | <i>L. infantum</i> | 80  | 927  | 1006 |
| LinJ36_V3.4960 | <i>L. infantum</i> | 56  | 166  | 221  |
| LinJ36_V3.4960 | <i>L. infantum</i> | 78  | 457  | 534  |

|                |                    |     |      |      |
|----------------|--------------------|-----|------|------|
| LinJ36_V3.4960 | <i>L. infantum</i> | 567 | 911  | 1477 |
| LinJ36_V3.4970 | <i>L. infantum</i> | 70  | 108  | 177  |
| LinJ36_V3.4970 | <i>L. infantum</i> | 216 | 481  | 696  |
| LinJ36_V3.4970 | <i>L. infantum</i> | 160 | 757  | 916  |
| LinJ36_V3.4970 | <i>L. infantum</i> | 104 | 966  | 1069 |
| LinJ36_V3.4970 | <i>L. infantum</i> | 98  | 1081 | 1178 |
| LinJ36_V3.4970 | <i>L. infantum</i> | 126 | 1276 | 1401 |
| LinJ36_V3.4990 | <i>L. infantum</i> | 77  | 51   | 127  |
| LinJ36_V3.4990 | <i>L. infantum</i> | 73  | 138  | 210  |
| LinJ36_V3.5020 | <i>L. infantum</i> | 162 | 1    | 162  |
| LinJ36_V3.5020 | <i>L. infantum</i> | 185 | 196  | 380  |
| LinJ36_V3.5020 | <i>L. infantum</i> | 258 | 400  | 657  |
| LinJ36_V3.5020 | <i>L. infantum</i> | 231 | 672  | 902  |
| LinJ36_V3.5030 | <i>L. infantum</i> | 46  | 97   | 142  |
| LinJ36_V3.5030 | <i>L. infantum</i> | 69  | 221  | 289  |
| LinJ36_V3.5050 | <i>L. infantum</i> | 172 | 1    | 172  |
| LinJ36_V3.5070 | <i>L. infantum</i> | 44  | 1    | 44   |
| LinJ36_V3.5070 | <i>L. infantum</i> | 43  | 372  | 414  |
| LinJ36_V3.5070 | <i>L. infantum</i> | 65  | 778  | 842  |
| LinJ36_V3.5070 | <i>L. infantum</i> | 109 | 881  | 989  |
| LinJ36_V3.5080 | <i>L. infantum</i> | 92  | 26   | 117  |
| LinJ36_V3.5080 | <i>L. infantum</i> | 52  | 218  | 269  |
| LinJ36_V3.5080 | <i>L. infantum</i> | 89  | 279  | 367  |
| LinJ36_V3.5080 | <i>L. infantum</i> | 57  | 420  | 476  |
| LinJ36_V3.5080 | <i>L. infantum</i> | 123 | 488  | 610  |
| LinJ36_V3.5110 | <i>L. infantum</i> | 55  | 214  | 268  |
| LinJ36_V3.5130 | <i>L. infantum</i> | 166 | 48   | 213  |
| LinJ36_V3.5130 | <i>L. infantum</i> | 78  | 1267 | 1344 |
| LinJ36_V3.5130 | <i>L. infantum</i> | 61  | 1505 | 1565 |
| LinJ36_V3.5130 | <i>L. infantum</i> | 65  | 1661 | 1725 |
| LinJ36_V3.5130 | <i>L. infantum</i> | 92  | 1876 | 1967 |
| LinJ36_V3.5130 | <i>L. infantum</i> | 54  | 1974 | 2027 |
| LinJ36_V3.5140 | <i>L. infantum</i> | 360 | 1    | 360  |
| LinJ36_V3.5150 | <i>L. infantum</i> | 80  | 114  | 193  |
| LinJ36_V3.5150 | <i>L. infantum</i> | 263 | 344  | 606  |
| LinJ36_V3.5170 | <i>L. infantum</i> | 49  | 93   | 141  |
| LinJ36_V3.5180 | <i>L. infantum</i> | 79  | 1    | 79   |
| LinJ36_V3.5180 | <i>L. infantum</i> | 113 | 201  | 313  |
| LinJ36_V3.5180 | <i>L. infantum</i> | 58  | 579  | 636  |
| LinJ36_V3.5190 | <i>L. infantum</i> | 166 | 247  | 412  |
| LinJ36_V3.5190 | <i>L. infantum</i> | 41  | 479  | 519  |
| LinJ36_V3.5190 | <i>L. infantum</i> | 46  | 868  | 913  |
| LinJ36_V3.5200 | <i>L. infantum</i> | 78  | 88   | 165  |
| LinJ36_V3.5200 | <i>L. infantum</i> | 135 | 212  | 346  |
| LinJ36_V3.5210 | <i>L. infantum</i> | 100 | 58   | 157  |
| LinJ36_V3.5220 | <i>L. infantum</i> | 60  | 28   | 87   |
| LinJ36_V3.5220 | <i>L. infantum</i> | 58  | 113  | 170  |

|                |                    |     |      |      |
|----------------|--------------------|-----|------|------|
| LinJ36_V3.5230 | <i>L. infantum</i> | 67  | 286  | 352  |
| LinJ36_V3.5250 | <i>L. infantum</i> | 64  | 1    | 64   |
| LinJ36_V3.5250 | <i>L. infantum</i> | 235 | 67   | 301  |
| LinJ36_V3.5250 | <i>L. infantum</i> | 310 | 313  | 622  |
| LinJ36_V3.5250 | <i>L. infantum</i> | 145 | 668  | 812  |
| LinJ36_V3.5260 | <i>L. infantum</i> | 108 | 1    | 108  |
| LinJ36_V3.5260 | <i>L. infantum</i> | 43  | 121  | 163  |
| LinJ36_V3.5260 | <i>L. infantum</i> | 106 | 212  | 317  |
| LinJ36_V3.5290 | <i>L. infantum</i> | 41  | 11   | 51   |
| LinJ36_V3.5290 | <i>L. infantum</i> | 98  | 156  | 253  |
| LinJ36_V3.5320 | <i>L. infantum</i> | 63  | 213  | 275  |
| LinJ36_V3.5330 | <i>L. infantum</i> | 240 | 1    | 240  |
| LinJ36_V3.5330 | <i>L. infantum</i> | 110 | 385  | 494  |
| LinJ36_V3.5330 | <i>L. infantum</i> | 71  | 598  | 668  |
| LinJ36_V3.5370 | <i>L. infantum</i> | 50  | 166  | 215  |
| LinJ36_V3.5370 | <i>L. infantum</i> | 231 | 288  | 518  |
| LinJ36_V3.5380 | <i>L. infantum</i> | 263 | 363  | 625  |
| LinJ36_V3.5390 | <i>L. infantum</i> | 40  | 201  | 240  |
| LinJ36_V3.5390 | <i>L. infantum</i> | 75  | 291  | 365  |
| LinJ36_V3.5420 | <i>L. infantum</i> | 230 | 1    | 230  |
| LinJ36_V3.5420 | <i>L. infantum</i> | 49  | 654  | 702  |
| LinJ36_V3.5420 | <i>L. infantum</i> | 93  | 1054 | 1146 |
| LinJ36_V3.5420 | <i>L. infantum</i> | 45  | 1174 | 1218 |
| LinJ36_V3.5440 | <i>L. infantum</i> | 81  | 1    | 81   |
| LinJ36_V3.5440 | <i>L. infantum</i> | 46  | 110  | 155  |
| LinJ36_V3.5440 | <i>L. infantum</i> | 51  | 1212 | 1262 |
| LinJ36_V3.5450 | <i>L. infantum</i> | 46  | 200  | 245  |
| LinJ36_V3.5470 | <i>L. infantum</i> | 109 | 54   | 162  |
| LinJ36_V3.5470 | <i>L. infantum</i> | 70  | 301  | 370  |
| LinJ36_V3.5480 | <i>L. infantum</i> | 43  | 163  | 205  |
| LinJ36_V3.5480 | <i>L. infantum</i> | 56  | 265  | 320  |
| LinJ36_V3.5480 | <i>L. infantum</i> | 40  | 360  | 399  |
| LinJ36_V3.5480 | <i>L. infantum</i> | 73  | 448  | 520  |
| LinJ36_V3.5480 | <i>L. infantum</i> | 88  | 554  | 641  |
| LinJ36_V3.5480 | <i>L. infantum</i> | 53  | 681  | 733  |
| LinJ36_V3.5480 | <i>L. infantum</i> | 472 | 906  | 1377 |
| LinJ36_V3.5480 | <i>L. infantum</i> | 47  | 1528 | 1574 |
| LinJ36_V3.5480 | <i>L. infantum</i> | 84  | 1632 | 1715 |
| LinJ36_V3.5480 | <i>L. infantum</i> | 53  | 1789 | 1841 |
| LinJ36_V3.5480 | <i>L. infantum</i> | 181 | 1857 | 2037 |
| LinJ36_V3.5480 | <i>L. infantum</i> | 94  | 2116 | 2209 |
| LinJ36_V3.5480 | <i>L. infantum</i> | 183 | 2261 | 2443 |
| LinJ36_V3.5480 | <i>L. infantum</i> | 94  | 2646 | 2739 |
| LinJ36_V3.5480 | <i>L. infantum</i> | 58  | 2879 | 2936 |
| LinJ36_V3.5480 | <i>L. infantum</i> | 99  | 3283 | 3381 |
| LinJ36_V3.5490 | <i>L. infantum</i> | 63  | 265  | 327  |
| LinJ36_V3.5490 | <i>L. infantum</i> | 154 | 692  | 845  |

|                |                    |     |     |      |
|----------------|--------------------|-----|-----|------|
| LinJ36_V3.5500 | <i>L. infantum</i> | 53  | 50  | 102  |
| LinJ36_V3.5500 | <i>L. infantum</i> | 44  | 271 | 314  |
| LinJ36_V3.5500 | <i>L. infantum</i> | 58  | 517 | 574  |
| LinJ36_V3.5500 | <i>L. infantum</i> | 64  | 657 | 720  |
| LinJ36_V3.5510 | <i>L. infantum</i> | 40  | 38  | 77   |
| LinJ36_V3.5510 | <i>L. infantum</i> | 46  | 116 | 161  |
| LinJ36_V3.5510 | <i>L. infantum</i> | 66  | 307 | 372  |
| LinJ36_V3.5510 | <i>L. infantum</i> | 40  | 435 | 474  |
| LinJ36_V3.5510 | <i>L. infantum</i> | 51  | 602 | 652  |
| LinJ36_V3.5510 | <i>L. infantum</i> | 65  | 674 | 738  |
| LinJ36_V3.5510 | <i>L. infantum</i> | 71  | 878 | 948  |
| LinJ36_V3.5520 | <i>L. infantum</i> | 84  | 1   | 84   |
| LinJ36_V3.5520 | <i>L. infantum</i> | 51  | 145 | 195  |
| LinJ36_V3.5520 | <i>L. infantum</i> | 51  | 145 | 195  |
| LinJ36_V3.5530 | <i>L. infantum</i> | 53  | 1   | 53   |
| LinJ36_V3.5530 | <i>L. infantum</i> | 114 | 90  | 203  |
| LinJ36_V3.5530 | <i>L. infantum</i> | 215 | 499 | 713  |
| LinJ36_V3.5540 | <i>L. infantum</i> | 48  | 1   | 48   |
| LinJ36_V3.5540 | <i>L. infantum</i> | 64  | 93  | 156  |
| LinJ36_V3.5540 | <i>L. infantum</i> | 54  | 318 | 371  |
| LinJ36_V3.5550 | <i>L. infantum</i> | 112 | 427 | 538  |
| LinJ36_V3.5560 | <i>L. infantum</i> | 158 | 141 | 298  |
| LinJ36_V3.5560 | <i>L. infantum</i> | 46  | 426 | 471  |
| LinJ36_V3.5560 | <i>L. infantum</i> | 57  | 690 | 746  |
| LinJ36_V3.5560 | <i>L. infantum</i> | 41  | 892 | 932  |
| LinJ36_V3.5560 | <i>L. infantum</i> | 80  | 959 | 1038 |
| LinJ36_V3.5570 | <i>L. infantum</i> | 645 | 1   | 645  |
| LinJ36_V3.5570 | <i>L. infantum</i> | 40  | 686 | 725  |
| LinJ36_V3.5580 | <i>L. infantum</i> | 41  | 1   | 41   |
| LinJ36_V3.5580 | <i>L. infantum</i> | 79  | 330 | 408  |
| LinJ36_V3.5580 | <i>L. infantum</i> | 72  | 437 | 508  |
| LinJ36_V3.5580 | <i>L. infantum</i> | 396 | 618 | 1013 |
| LinJ36_V3.5600 | <i>L. infantum</i> | 54  | 1   | 54   |
| LinJ36_V3.5600 | <i>L. infantum</i> | 69  | 477 | 545  |
| LinJ36_V3.5600 | <i>L. infantum</i> | 69  | 477 | 545  |
| LinJ36_V3.5610 | <i>L. infantum</i> | 178 | 316 | 493  |
| LinJ36_V3.5620 | <i>L. infantum</i> | 77  | 451 | 527  |
| LinJ36_V3.5640 | <i>L. infantum</i> | 70  | 48  | 117  |
| LinJ36_V3.5640 | <i>L. infantum</i> | 95  | 385 | 479  |
| LinJ36_V3.5640 | <i>L. infantum</i> | 72  | 513 | 584  |
| LinJ36_V3.5650 | <i>L. infantum</i> | 51  | 1   | 51   |
| LinJ36_V3.5660 | <i>L. infantum</i> | 104 | 186 | 289  |
| LinJ36_V3.5670 | <i>L. infantum</i> | 72  | 173 | 244  |
| LinJ36_V3.5680 | <i>L. infantum</i> | 242 | 1   | 242  |
| LinJ36_V3.5680 | <i>L. infantum</i> | 46  | 391 | 436  |
| LinJ36_V3.5680 | <i>L. infantum</i> | 48  | 478 | 525  |
| LinJ36_V3.5690 | <i>L. infantum</i> | 51  | 134 | 184  |

|                |                    |     |      |      |
|----------------|--------------------|-----|------|------|
| LinJ36_V3.5700 | <i>L. infantum</i> | 48  | 459  | 506  |
| LinJ36_V3.5710 | <i>L. infantum</i> | 67  | 1    | 67   |
| LinJ36_V3.5710 | <i>L. infantum</i> | 68  | 97   | 164  |
| LinJ36_V3.5710 | <i>L. infantum</i> | 68  | 189  | 256  |
| LinJ36_V3.5710 | <i>L. infantum</i> | 115 | 341  | 455  |
| LinJ36_V3.5720 | <i>L. infantum</i> | 144 | 23   | 166  |
| LinJ36_V3.5720 | <i>L. infantum</i> | 232 | 410  | 641  |
| LinJ36_V3.5730 | <i>L. infantum</i> | 171 | 1    | 171  |
| LinJ36_V3.5730 | <i>L. infantum</i> | 48  | 248  | 295  |
| LinJ36_V3.5730 | <i>L. infantum</i> | 48  | 248  | 295  |
| LinJ36_V3.5740 | <i>L. infantum</i> | 64  | 1    | 64   |
| LinJ36_V3.5750 | <i>L. infantum</i> | 201 | 1    | 201  |
| LinJ36_V3.5770 | <i>L. infantum</i> | 46  | 27   | 72   |
| LinJ36_V3.5780 | <i>L. infantum</i> | 52  | 299  | 350  |
| LinJ36_V3.5790 | <i>L. infantum</i> | 78  | 479  | 556  |
| LinJ36_V3.5790 | <i>L. infantum</i> | 57  | 598  | 654  |
| LinJ36_V3.5790 | <i>L. infantum</i> | 60  | 1242 | 1301 |
| LinJ36_V3.5800 | <i>L. infantum</i> | 53  | 325  | 377  |
| LinJ36_V3.5820 | <i>L. infantum</i> | 43  | 111  | 153  |
| LinJ36_V3.5820 | <i>L. infantum</i> | 43  | 287  | 329  |
| LinJ36_V3.5820 | <i>L. infantum</i> | 43  | 287  | 329  |
| LinJ36_V3.5830 | <i>L. infantum</i> | 42  | 1    | 42   |
| LinJ36_V3.5830 | <i>L. infantum</i> | 71  | 44   | 114  |
| LinJ36_V3.5850 | <i>L. infantum</i> | 81  | 34   | 114  |
| LinJ36_V3.5850 | <i>L. infantum</i> | 72  | 121  | 192  |
| LinJ36_V3.5850 | <i>L. infantum</i> | 44  | 241  | 284  |
| LinJ36_V3.5850 | <i>L. infantum</i> | 64  | 347  | 410  |
| LinJ36_V3.5880 | <i>L. infantum</i> | 57  | 96   | 152  |
| LinJ36_V3.5890 | <i>L. infantum</i> | 118 | 378  | 495  |
| LinJ36_V3.5900 | <i>L. infantum</i> | 113 | 215  | 327  |
| LinJ36_V3.5910 | <i>L. infantum</i> | 55  | 300  | 354  |
| LinJ36_V3.5910 | <i>L. infantum</i> | 42  | 362  | 403  |
| LinJ36_V3.5910 | <i>L. infantum</i> | 71  | 527  | 597  |
| LinJ36_V3.5910 | <i>L. infantum</i> | 67  | 651  | 717  |
| LinJ36_V3.5920 | <i>L. infantum</i> | 49  | 558  | 606  |
| LinJ36_V3.5940 | <i>L. infantum</i> | 69  | 209  | 277  |
| LinJ36_V3.5980 | <i>L. infantum</i> | 49  | 118  | 166  |
| LinJ36_V3.5980 | <i>L. infantum</i> | 70  | 332  | 401  |
| LinJ36_V3.5980 | <i>L. infantum</i> | 65  | 586  | 650  |
| LinJ36_V3.5990 | <i>L. infantum</i> | 503 | 1    | 503  |
| LinJ36_V3.5990 | <i>L. infantum</i> | 171 | 527  | 697  |
| LinJ36_V3.6000 | <i>L. infantum</i> | 41  | 80   | 120  |
| LinJ36_V3.6010 | <i>L. infantum</i> | 46  | 254  | 299  |
| LinJ36_V3.6010 | <i>L. infantum</i> | 44  | 350  | 393  |
| LinJ36_V3.6010 | <i>L. infantum</i> | 51  | 397  | 447  |
| LinJ36_V3.6010 | <i>L. infantum</i> | 45  | 649  | 693  |
| LinJ36_V3.6010 | <i>L. infantum</i> | 82  | 1059 | 1140 |

|                |                    |     |      |      |
|----------------|--------------------|-----|------|------|
| LinJ36_V3.6010 | <i>L. infantum</i> | 59  | 1443 | 1501 |
| LinJ36_V3.6010 | <i>L. infantum</i> | 83  | 1620 | 1702 |
| LinJ36_V3.6030 | <i>L. infantum</i> | 83  | 62   | 144  |
| LinJ36_V3.6030 | <i>L. infantum</i> | 56  | 255  | 310  |
| LinJ36_V3.6030 | <i>L. infantum</i> | 56  | 255  | 310  |
| LinJ36_V3.6040 | <i>L. infantum</i> | 70  | 187  | 256  |
| LinJ36_V3.6050 | <i>L. infantum</i> | 55  | 19   | 73   |
| LinJ36_V3.6050 | <i>L. infantum</i> | 51  | 292  | 342  |
| LinJ36_V3.6050 | <i>L. infantum</i> | 78  | 790  | 867  |
| LinJ36_V3.6070 | <i>L. infantum</i> | 77  | 68   | 144  |
| LinJ36_V3.6070 | <i>L. infantum</i> | 194 | 151  | 344  |
| LinJ36_V3.6070 | <i>L. infantum</i> | 68  | 375  | 442  |
| LinJ36_V3.6090 | <i>L. infantum</i> | 53  | 30   | 82   |
| LinJ36_V3.6090 | <i>L. infantum</i> | 119 | 89   | 207  |
| LinJ36_V3.6090 | <i>L. infantum</i> | 130 | 218  | 347  |
| LinJ36_V3.6100 | <i>L. infantum</i> | 66  | 22   | 87   |
| LinJ36_V3.6110 | <i>L. infantum</i> | 162 | 1    | 162  |
| LinJ36_V3.6110 | <i>L. infantum</i> | 323 | 195  | 517  |
| LinJ36_V3.6120 | <i>L. infantum</i> | 87  | 397  | 483  |
| LinJ36_V3.6120 | <i>L. infantum</i> | 72  | 599  | 670  |
| LinJ36_V3.6120 | <i>L. infantum</i> | 72  | 599  | 670  |
| LinJ36_V3.6130 | <i>L. infantum</i> | 60  | 220  | 279  |
| LinJ36_V3.6150 | <i>L. infantum</i> | 112 | 1    | 112  |
| LinJ36_V3.6150 | <i>L. infantum</i> | 91  | 395  | 485  |
| LinJ36_V3.6150 | <i>L. infantum</i> | 67  | 1082 | 1148 |
| LinJ36_V3.6150 | <i>L. infantum</i> | 50  | 1810 | 1859 |
| LinJ36_V3.6180 | <i>L. infantum</i> | 62  | 20   | 81   |
| LinJ36_V3.6180 | <i>L. infantum</i> | 44  | 118  | 161  |
| LinJ36_V3.6190 | <i>L. infantum</i> | 292 | 1    | 292  |
| LinJ36_V3.6210 | <i>L. infantum</i> | 112 | 85   | 196  |
| LinJ36_V3.6210 | <i>L. infantum</i> | 110 | 233  | 342  |
| LinJ36_V3.6230 | <i>L. infantum</i> | 249 | 375  | 623  |
| LinJ36_V3.6240 | <i>L. infantum</i> | 75  | 319  | 393  |
| LinJ36_V3.6250 | <i>L. infantum</i> | 102 | 159  | 260  |
| LinJ36_V3.6250 | <i>L. infantum</i> | 155 | 374  | 528  |
| LinJ36_V3.6260 | <i>L. infantum</i> | 173 | 1    | 173  |
| LinJ36_V3.6260 | <i>L. infantum</i> | 153 | 177  | 329  |
| LinJ36_V3.6260 | <i>L. infantum</i> | 147 | 340  | 486  |
| LinJ36_V3.6260 | <i>L. infantum</i> | 127 | 635  | 761  |
| LinJ36_V3.6260 | <i>L. infantum</i> | 67  | 785  | 851  |
| LinJ36_V3.6270 | <i>L. infantum</i> | 227 | 1    | 227  |
| LinJ36_V3.6270 | <i>L. infantum</i> | 57  | 302  | 358  |
| LinJ36_V3.6270 | <i>L. infantum</i> | 40  | 434  | 473  |
| LinJ36_V3.6270 | <i>L. infantum</i> | 58  | 536  | 593  |
| LinJ36_V3.6280 | <i>L. infantum</i> | 75  | 85   | 159  |
| LinJ36_V3.6300 | <i>L. infantum</i> | 74  | 1    | 74   |
| LinJ36_V3.6300 | <i>L. infantum</i> | 57  | 76   | 132  |

|                |                    |     |      |      |
|----------------|--------------------|-----|------|------|
| LinJ36_V3.6300 | <i>L. infantum</i> | 59  | 272  | 330  |
| LinJ36_V3.6300 | <i>L. infantum</i> | 58  | 860  | 917  |
| LinJ36_V3.6320 | <i>L. infantum</i> | 43  | 53   | 95   |
| LinJ36_V3.6320 | <i>L. infantum</i> | 45  | 174  | 218  |
| LinJ36_V3.6320 | <i>L. infantum</i> | 189 | 332  | 520  |
| LinJ36_V3.6330 | <i>L. infantum</i> | 188 | 1    | 188  |
| LinJ36_V3.6340 | <i>L. infantum</i> | 90  | 1    | 90   |
| LinJ36_V3.6370 | <i>L. infantum</i> | 40  | 126  | 165  |
| LinJ36_V3.6390 | <i>L. infantum</i> | 167 | 1    | 167  |
| LinJ36_V3.6390 | <i>L. infantum</i> | 99  | 225  | 323  |
| LinJ36_V3.6390 | <i>L. infantum</i> | 99  | 225  | 323  |
| LinJ36_V3.6400 | <i>L. infantum</i> | 510 | 235  | 744  |
| LinJ36_V3.6410 | <i>L. infantum</i> | 53  | 115  | 167  |
| LinJ36_V3.6410 | <i>L. infantum</i> | 115 | 175  | 289  |
| LinJ36_V3.6410 | <i>L. infantum</i> | 115 | 175  | 289  |
| LinJ36_V3.6420 | <i>L. infantum</i> | 208 | 1    | 208  |
| LinJ36_V3.6430 | <i>L. infantum</i> | 122 | 116  | 237  |
| LinJ36_V3.6460 | <i>L. infantum</i> | 220 | 76   | 295  |
| LinJ36_V3.6460 | <i>L. infantum</i> | 138 | 309  | 446  |
| LinJ36_V3.6460 | <i>L. infantum</i> | 45  | 481  | 525  |
| LinJ36_V3.6460 | <i>L. infantum</i> | 68  | 875  | 942  |
| LinJ36_V3.6480 | <i>L. infantum</i> | 162 | 1    | 162  |
| LinJ36_V3.6480 | <i>L. infantum</i> | 162 | 181  | 342  |
| LinJ36_V3.6480 | <i>L. infantum</i> | 67  | 344  | 410  |
| LinJ36_V3.6480 | <i>L. infantum</i> | 367 | 442  | 808  |
| LinJ36_V3.6480 | <i>L. infantum</i> | 186 | 843  | 1028 |
| LinJ36_V3.6480 | <i>L. infantum</i> | 52  | 1035 | 1086 |
| LinJ36_V3.6480 | <i>L. infantum</i> | 255 | 1125 | 1379 |
| LinJ36_V3.6500 | <i>L. infantum</i> | 45  | 16   | 60   |
| LinJ36_V3.6500 | <i>L. infantum</i> | 342 | 297  | 638  |
| LinJ36_V3.6500 | <i>L. infantum</i> | 91  | 648  | 738  |
| LinJ36_V3.6510 | <i>L. infantum</i> | 131 | 166  | 296  |
| LinJ36_V3.6530 | <i>L. infantum</i> | 83  | 31   | 113  |
| LinJ36_V3.6530 | <i>L. infantum</i> | 51  | 129  | 179  |
| LinJ36_V3.6530 | <i>L. infantum</i> | 51  | 129  | 179  |
| LinJ36_V3.6550 | <i>L. infantum</i> | 40  | 1    | 40   |
| LinJ36_V3.6550 | <i>L. infantum</i> | 43  | 117  | 159  |
| LinJ36_V3.6550 | <i>L. infantum</i> | 43  | 117  | 159  |
| LinJ36_V3.6560 | <i>L. infantum</i> | 123 | 1    | 123  |
| LinJ36_V3.6560 | <i>L. infantum</i> | 43  | 203  | 245  |
| LinJ36_V3.6580 | <i>L. infantum</i> | 40  | 1208 | 1247 |
| LinJ36_V3.6580 | <i>L. infantum</i> | 112 | 2410 | 2521 |
| LinJ36_V3.6580 | <i>L. infantum</i> | 48  | 2539 | 2586 |
| LinJ36_V3.6640 | <i>L. infantum</i> | 45  | 1    | 45   |
| LinJ36_V3.6640 | <i>L. infantum</i> | 106 | 159  | 264  |
| LinJ36_V3.6650 | <i>L. infantum</i> | 148 | 70   | 217  |
| LinJ36_V3.6660 | <i>L. infantum</i> | 44  | 184  | 227  |

|                |                    |     |     |     |
|----------------|--------------------|-----|-----|-----|
| LinJ36_V3.6660 | <i>L. infantum</i> | 57  | 359 | 415 |
| LinJ36_V3.6660 | <i>L. infantum</i> | 57  | 359 | 415 |
| LinJ36_V3.6680 | <i>L. infantum</i> | 168 | 1   | 168 |
| LinJ36_V3.6690 | <i>L. infantum</i> | 329 | 192 | 520 |
| LinJ36_V3.6700 | <i>L. infantum</i> | 55  | 152 | 206 |
| LinJ36_V3.6710 | <i>L. infantum</i> | 121 | 1   | 121 |
| LinJ36_V3.6710 | <i>L. infantum</i> | 40  | 192 | 231 |
| LinJ36_V3.6720 | <i>L. infantum</i> | 46  | 168 | 213 |
| LinJ36_V3.6720 | <i>L. infantum</i> | 67  | 242 | 308 |
| LinJ36_V3.6750 | <i>L. infantum</i> | 406 | 64  | 469 |
| LinJ36_V3.6770 | <i>L. infantum</i> | 205 | 441 | 645 |
| LinJ36_V3.6780 | <i>L. infantum</i> | 148 | 178 | 325 |
| LinJ36_V3.6790 | <i>L. infantum</i> | 161 | 28  | 188 |
| LinJ36_V3.6800 | <i>L. infantum</i> | 52  | 39  | 90  |
| LinJ36_V3.6810 | <i>L. infantum</i> | 77  | 107 | 183 |
| LinJ36_V3.6810 | <i>L. infantum</i> | 355 | 275 | 629 |
| LinJ36_V3.6830 | <i>L. infantum</i> | 46  | 25  | 70  |
| LinJ36_V3.6830 | <i>L. infantum</i> | 139 | 102 | 240 |
| LinJ36_V3.6830 | <i>L. infantum</i> | 110 | 554 | 663 |
| LinJ36_V3.6840 | <i>L. infantum</i> | 177 | 1   | 177 |
| LinJ36_V3.6840 | <i>L. infantum</i> | 184 | 214 | 397 |
| LinJ36_V3.6860 | <i>L. infantum</i> | 40  | 158 | 197 |
| LinJ36_V3.6870 | <i>L. infantum</i> | 99  | 93  | 191 |
| LinJ36_V3.6870 | <i>L. infantum</i> | 112 | 213 | 324 |
| LinJ36_V3.6900 | <i>L. infantum</i> | 51  | 1   | 51  |
| LinJ36_V3.6900 | <i>L. infantum</i> | 41  | 70  | 110 |
| LinJ36_V3.6900 | <i>L. infantum</i> | 154 | 127 | 280 |
| LinJ36_V3.6900 | <i>L. infantum</i> | 49  | 320 | 368 |
| LinJ36_V3.6900 | <i>L. infantum</i> | 50  | 405 | 454 |
| LinJ36_V3.6900 | <i>L. infantum</i> | 45  | 524 | 568 |
| LinJ36_V3.6910 | <i>L. infantum</i> | 41  | 478 | 518 |
| LinJ36_V3.6910 | <i>L. infantum</i> | 43  | 693 | 735 |
| LinJ36_V3.6910 | <i>L. infantum</i> | 43  | 693 | 735 |
| LinJ36_V3.6920 | <i>L. infantum</i> | 45  | 1   | 45  |
| LinJ36_V3.6940 | <i>L. infantum</i> | 49  | 81  | 129 |
| LinJ36_V3.6990 | <i>L. infantum</i> | 87  | 58  | 144 |
| LinJ36_V3.7010 | <i>L. infantum</i> | 56  | 268 | 323 |
| LinJ36_V3.7040 | <i>L. infantum</i> | 74  | 1   | 74  |
| LinJ36_V3.7040 | <i>L. infantum</i> | 49  | 79  | 127 |
| LinJ36_V3.7040 | <i>L. infantum</i> | 80  | 394 | 473 |
| LinJ36_V3.7040 | <i>L. infantum</i> | 48  | 599 | 646 |
| LinJ36_V3.7040 | <i>L. infantum</i> | 64  | 830 | 893 |
| LinJ36_V3.7080 | <i>L. infantum</i> | 48  | 1   | 48  |
| LinJ36_V3.7080 | <i>L. infantum</i> | 97  | 650 | 746 |
| LinJ36_V3.7090 | <i>L. infantum</i> | 46  | 1   | 46  |
| LinJ36_V3.7110 | <i>L. infantum</i> | 58  | 429 | 486 |
| LinJ36_V3.7120 | <i>L. infantum</i> | 55  | 275 | 329 |



|                |                    |     |      |      |
|----------------|--------------------|-----|------|------|
| LinJ36_V3.7120 | <i>L. infantum</i> | 45  | 693  | 737  |
| LinJ36_V3.7160 | <i>L. infantum</i> | 45  | 1    | 45   |
| LinJ36_V3.7160 | <i>L. infantum</i> | 66  | 85   | 150  |
| LinJ36_V3.7160 | <i>L. infantum</i> | 66  | 85   | 150  |
| LinJ36_V3.7190 | <i>L. infantum</i> | 98  | 1    | 98   |
| LinJ36_V3.7200 | <i>L. infantum</i> | 63  | 142  | 204  |
| LinJ36_V3.7210 | <i>L. infantum</i> | 106 | 181  | 286  |
| LinJ36_V3.7220 | <i>L. infantum</i> | 56  | 389  | 444  |
| LinJ36_V3.7220 | <i>L. infantum</i> | 41  | 528  | 568  |
| LinJ36_V3.7220 | <i>L. infantum</i> | 41  | 528  | 568  |
| LinJ36_V3.7230 | <i>L. infantum</i> | 95  | 154  | 248  |
| LinJ36_V3.7230 | <i>L. infantum</i> | 354 | 354  | 707  |
| LinJ36_V3.7260 | <i>L. infantum</i> | 87  | 82   | 168  |
| LinJ36_V3.7260 | <i>L. infantum</i> | 254 | 261  | 514  |
| LinJ36_V3.7300 | <i>L. infantum</i> | 251 | 1    | 251  |
| LinJ36_V3.7300 | <i>L. infantum</i> | 48  | 258  | 305  |
| LinJ36_V3.7320 | <i>L. infantum</i> | 55  | 1    | 55   |
| LinJ36_V3.7320 | <i>L. infantum</i> | 67  | 115  | 181  |
| LinJ36_V3.7320 | <i>L. infantum</i> | 50  | 682  | 731  |
| Tbg.972.2.1010 | <i>T. brucei</i>   | 91  | 131  | 221  |
| Tbg.972.2.1030 | <i>T. brucei</i>   | 93  | 1    | 93   |
| Tbg.972.2.1050 | <i>T. brucei</i>   | 200 | 101  | 300  |
| Tbg.972.2.1050 | <i>T. brucei</i>   | 51  | 351  | 401  |
| Tbg.972.2.1050 | <i>T. brucei</i>   | 111 | 408  | 518  |
| Tbg.972.2.1050 | <i>T. brucei</i>   | 73  | 541  | 613  |
| Tbg.972.2.1070 | <i>T. brucei</i>   | 41  | 20   | 60   |
| Tbg.972.2.1110 | <i>T. brucei</i>   | 48  | 1    | 48   |
| Tbg.972.2.1110 | <i>T. brucei</i>   | 220 | 123  | 342  |
| Tbg.972.2.1110 | <i>T. brucei</i>   | 176 | 354  | 529  |
| Tbg.972.2.1110 | <i>T. brucei</i>   | 190 | 549  | 738  |
| Tbg.972.2.1120 | <i>T. brucei</i>   | 137 | 1    | 137  |
| Tbg.972.2.1130 | <i>T. brucei</i>   | 53  | 32   | 84   |
| Tbg.972.2.1130 | <i>T. brucei</i>   | 52  | 311  | 362  |
| Tbg.972.2.1130 | <i>T. brucei</i>   | 57  | 486  | 542  |
| Tbg.972.2.1140 | <i>T. brucei</i>   | 96  | 71   | 166  |
| Tbg.972.2.1160 | <i>T. brucei</i>   | 70  | 40   | 109  |
| Tbg.972.2.1160 | <i>T. brucei</i>   | 106 | 191  | 296  |
| Tbg.972.2.1160 | <i>T. brucei</i>   | 443 | 299  | 741  |
| Tbg.972.2.1160 | <i>T. brucei</i>   | 76  | 743  | 818  |
| Tbg.972.2.1160 | <i>T. brucei</i>   | 86  | 820  | 905  |
| Tbg.972.2.1160 | <i>T. brucei</i>   | 135 | 920  | 1054 |
| Tbg.972.2.1170 | <i>T. brucei</i>   | 45  | 61   | 105  |
| Tbg.972.2.1190 | <i>T. brucei</i>   | 113 | 1    | 113  |
| Tbg.972.2.1200 | <i>T. brucei</i>   | 74  | 135  | 208  |
| Tbg.972.2.1200 | <i>T. brucei</i>   | 65  | 980  | 1044 |
| Tbg.972.2.1200 | <i>T. brucei</i>   | 113 | 1058 | 1170 |
| Tbg.972.2.1200 | <i>T. brucei</i>   | 71  | 1252 | 1322 |

|                |                  |     |      |      |
|----------------|------------------|-----|------|------|
| Tbg.972.2.1200 | <i>T. brucei</i> | 75  | 1399 | 1473 |
| Tbg.972.2.1200 | <i>T. brucei</i> | 55  | 1844 | 1898 |
| Tbg.972.2.1200 | <i>T. brucei</i> | 52  | 2002 | 2053 |
| Tbg.972.2.1200 | <i>T. brucei</i> | 88  | 2232 | 2319 |
| Tbg.972.2.1200 | <i>T. brucei</i> | 81  | 2501 | 2581 |
| Tbg.972.2.1200 | <i>T. brucei</i> | 118 | 2623 | 2740 |
| Tbg.972.2.1200 | <i>T. brucei</i> | 78  | 2903 | 2980 |
| Tbg.972.2.1200 | <i>T. brucei</i> | 87  | 3262 | 3348 |
| Tbg.972.2.1230 | <i>T. brucei</i> | 386 | 1    | 386  |
| Tbg.972.2.1230 | <i>T. brucei</i> | 50  | 393  | 442  |
| Tbg.972.2.1230 | <i>T. brucei</i> | 237 | 706  | 942  |
| Tbg.972.2.1230 | <i>T. brucei</i> | 58  | 1319 | 1376 |
| Tbg.972.2.1230 | <i>T. brucei</i> | 62  | 1440 | 1501 |
| Tbg.972.2.1260 | <i>T. brucei</i> | 69  | 96   | 164  |
| Tbg.972.2.1300 | <i>T. brucei</i> | 90  | 58   | 147  |
| Tbg.972.2.1300 | <i>T. brucei</i> | 42  | 152  | 193  |
| Tbg.972.2.1300 | <i>T. brucei</i> | 47  | 196  | 242  |
| Tbg.972.2.1310 | <i>T. brucei</i> | 48  | 1    | 48   |
| Tbg.972.2.1310 | <i>T. brucei</i> | 48  | 64   | 111  |
| Tbg.972.2.1310 | <i>T. brucei</i> | 180 | 254  | 433  |
| Tbg.972.2.1330 | <i>T. brucei</i> | 40  | 30   | 69   |
| Tbg.972.2.1340 | <i>T. brucei</i> | 43  | 39   | 81   |
| Tbg.972.2.1350 | <i>T. brucei</i> | 54  | 174  | 227  |
| Tbg.972.2.1370 | <i>T. brucei</i> | 44  | 1    | 44   |
| Tbg.972.2.1370 | <i>T. brucei</i> | 78  | 106  | 183  |
| Tbg.972.2.1380 | <i>T. brucei</i> | 233 | 1    | 233  |
| Tbg.972.2.1380 | <i>T. brucei</i> | 227 | 263  | 489  |
| Tbg.972.2.1380 | <i>T. brucei</i> | 41  | 675  | 715  |
| Tbg.972.2.1380 | <i>T. brucei</i> | 182 | 774  | 955  |
| Tbg.972.2.1410 | <i>T. brucei</i> | 44  | 65   | 108  |
| Tbg.972.2.1410 | <i>T. brucei</i> | 68  | 285  | 352  |
| Tbg.972.2.1410 | <i>T. brucei</i> | 68  | 285  | 352  |
| Tbg.972.2.1420 | <i>T. brucei</i> | 100 | 1    | 100  |
| Tbg.972.2.1420 | <i>T. brucei</i> | 146 | 111  | 256  |
| Tbg.972.2.1420 | <i>T. brucei</i> | 61  | 320  | 380  |
| Tbg.972.2.1430 | <i>T. brucei</i> | 292 | 94   | 385  |
| Tbg.972.2.1430 | <i>T. brucei</i> | 41  | 608  | 648  |
| Tbg.972.2.1430 | <i>T. brucei</i> | 231 | 802  | 1032 |
| Tbg.972.2.1440 | <i>T. brucei</i> | 53  | 43   | 95   |
| Tbg.972.2.1440 | <i>T. brucei</i> | 90  | 329  | 418  |
| Tbg.972.2.1440 | <i>T. brucei</i> | 90  | 329  | 418  |
| Tbg.972.2.1500 | <i>T. brucei</i> | 91  | 1    | 91   |
| Tbg.972.2.1500 | <i>T. brucei</i> | 88  | 126  | 213  |
| Tbg.972.2.1500 | <i>T. brucei</i> | 61  | 301  | 361  |
| Tbg.972.2.1530 | <i>T. brucei</i> | 53  | 1    | 53   |
| Tbg.972.2.1560 | <i>T. brucei</i> | 66  | 88   | 153  |
| Tbg.972.2.1560 | <i>T. brucei</i> | 60  | 200  | 259  |

|                |                  |     |     |     |
|----------------|------------------|-----|-----|-----|
| Tbg.972.2.1560 | <i>T. brucei</i> | 63  | 296 | 358 |
| Tbg.972.2.1570 | <i>T. brucei</i> | 66  | 88  | 153 |
| Tbg.972.2.1570 | <i>T. brucei</i> | 57  | 225 | 281 |
| Tbg.972.2.1570 | <i>T. brucei</i> | 60  | 299 | 358 |
| Tbg.972.2.1580 | <i>T. brucei</i> | 66  | 88  | 153 |
| Tbg.972.2.1580 | <i>T. brucei</i> | 43  | 224 | 266 |
| Tbg.972.2.1580 | <i>T. brucei</i> | 43  | 224 | 266 |
| Tbg.972.2.1600 | <i>T. brucei</i> | 67  | 88  | 154 |
| Tbg.972.2.1600 | <i>T. brucei</i> | 58  | 224 | 281 |
| Tbg.972.2.1600 | <i>T. brucei</i> | 60  | 299 | 358 |
| Tbg.972.2.1630 | <i>T. brucei</i> | 67  | 88  | 154 |
| Tbg.972.2.1630 | <i>T. brucei</i> | 58  | 224 | 281 |
| Tbg.972.2.1630 | <i>T. brucei</i> | 61  | 299 | 359 |
| Tbg.972.2.1650 | <i>T. brucei</i> | 67  | 88  | 154 |
| Tbg.972.2.1650 | <i>T. brucei</i> | 58  | 224 | 281 |
| Tbg.972.2.1650 | <i>T. brucei</i> | 61  | 299 | 359 |
| Tbg.972.2.1680 | <i>T. brucei</i> | 116 | 21  | 136 |
| Tbg.972.2.1680 | <i>T. brucei</i> | 62  | 146 | 207 |
| Tbg.972.2.1680 | <i>T. brucei</i> | 62  | 146 | 207 |
| Tbg.972.2.1700 | <i>T. brucei</i> | 131 | 24  | 154 |
| Tbg.972.2.1700 | <i>T. brucei</i> | 67  | 226 | 292 |
| Tbg.972.2.1700 | <i>T. brucei</i> | 62  | 296 | 357 |
| Tbg.972.2.1720 | <i>T. brucei</i> | 47  | 24  | 70  |
| Tbg.972.2.1720 | <i>T. brucei</i> | 62  | 92  | 153 |
| Tbg.972.2.1720 | <i>T. brucei</i> | 184 | 174 | 357 |
| Tbg.972.2.1740 | <i>T. brucei</i> | 47  | 24  | 70  |
| Tbg.972.2.1740 | <i>T. brucei</i> | 45  | 109 | 153 |
| Tbg.972.2.1740 | <i>T. brucei</i> | 184 | 174 | 357 |
| Tbg.972.2.1760 | <i>T. brucei</i> | 67  | 88  | 154 |
| Tbg.972.2.1760 | <i>T. brucei</i> | 62  | 225 | 286 |
| Tbg.972.2.1760 | <i>T. brucei</i> | 62  | 296 | 357 |
| Tbg.972.2.1770 | <i>T. brucei</i> | 128 | 24  | 151 |
| Tbg.972.2.1770 | <i>T. brucei</i> | 184 | 174 | 357 |
| Tbg.972.2.1790 | <i>T. brucei</i> | 69  | 87  | 155 |
| Tbg.972.2.1790 | <i>T. brucei</i> | 43  | 222 | 264 |
| Tbg.972.2.1790 | <i>T. brucei</i> | 52  | 310 | 361 |
| Tbg.972.2.1810 | <i>T. brucei</i> | 111 | 73  | 183 |
| Tbg.972.2.1820 | <i>T. brucei</i> | 65  | 1   | 65  |
| Tbg.972.2.1840 | <i>T. brucei</i> | 90  | 1   | 90  |
| Tbg.972.2.1840 | <i>T. brucei</i> | 48  | 97  | 144 |
| Tbg.972.2.1840 | <i>T. brucei</i> | 62  | 151 | 212 |
| Tbg.972.2.1850 | <i>T. brucei</i> | 196 | 79  | 274 |
| Tbg.972.2.1850 | <i>T. brucei</i> | 52  | 290 | 341 |
| Tbg.972.2.1870 | <i>T. brucei</i> | 45  | 82  | 126 |
| Tbg.972.2.190  | <i>T. brucei</i> | 143 | 68  | 210 |
| Tbg.972.2.1900 | <i>T. brucei</i> | 40  | 1   | 40  |
| Tbg.972.2.1910 | <i>T. brucei</i> | 147 | 96  | 242 |

|                |                  |     |      |      |
|----------------|------------------|-----|------|------|
| Tbg.972.2.1940 | <i>T. brucei</i> | 125 | 53   | 177  |
| Tbg.972.2.1940 | <i>T. brucei</i> | 70  | 246  | 315  |
| Tbg.972.2.1940 | <i>T. brucei</i> | 100 | 353  | 452  |
| Tbg.972.2.1970 | <i>T. brucei</i> | 46  | 119  | 164  |
| Tbg.972.2.1970 | <i>T. brucei</i> | 64  | 197  | 260  |
| Tbg.972.2.1990 | <i>T. brucei</i> | 62  | 1    | 62   |
| Tbg.972.2.1990 | <i>T. brucei</i> | 40  | 679  | 718  |
| Tbg.972.2.1990 | <i>T. brucei</i> | 157 | 1904 | 2060 |
| Tbg.972.2.1990 | <i>T. brucei</i> | 40  | 2156 | 2195 |
| Tbg.972.2.1990 | <i>T. brucei</i> | 45  | 2492 | 2536 |
| Tbg.972.2.1990 | <i>T. brucei</i> | 82  | 2651 | 2732 |
| Tbg.972.2.1990 | <i>T. brucei</i> | 41  | 2870 | 2910 |
| Tbg.972.2.1990 | <i>T. brucei</i> | 93  | 3108 | 3200 |
| Tbg.972.2.2010 | <i>T. brucei</i> | 111 | 139  | 249  |
| Tbg.972.2.2020 | <i>T. brucei</i> | 73  | 1    | 73   |
| Tbg.972.2.2020 | <i>T. brucei</i> | 42  | 361  | 402  |
| Tbg.972.2.2040 | <i>T. brucei</i> | 50  | 418  | 467  |
| Tbg.972.2.2040 | <i>T. brucei</i> | 51  | 688  | 738  |
| Tbg.972.2.2040 | <i>T. brucei</i> | 51  | 688  | 738  |
| Tbg.972.2.2050 | <i>T. brucei</i> | 244 | 1    | 244  |
| Tbg.972.2.2070 | <i>T. brucei</i> | 53  | 124  | 176  |
| Tbg.972.2.2100 | <i>T. brucei</i> | 46  | 198  | 243  |
| Tbg.972.2.2100 | <i>T. brucei</i> | 127 | 261  | 387  |
| Tbg.972.2.2140 | <i>T. brucei</i> | 111 | 1    | 111  |
| Tbg.972.2.2160 | <i>T. brucei</i> | 51  | 65   | 115  |
| Tbg.972.2.2170 | <i>T. brucei</i> | 144 | 646  | 789  |
| Tbg.972.2.2180 | <i>T. brucei</i> | 99  | 51   | 149  |
| Tbg.972.2.2190 | <i>T. brucei</i> | 265 | 30   | 294  |
| Tbg.972.2.2200 | <i>T. brucei</i> | 605 | 12   | 616  |
| Tbg.972.2.2200 | <i>T. brucei</i> | 165 | 703  | 867  |
| Tbg.972.2.2200 | <i>T. brucei</i> | 58  | 946  | 1003 |
| Tbg.972.2.2210 | <i>T. brucei</i> | 59  | 50   | 108  |
| Tbg.972.2.2210 | <i>T. brucei</i> | 47  | 446  | 492  |
| Tbg.972.2.2210 | <i>T. brucei</i> | 47  | 723  | 769  |
| Tbg.972.2.2210 | <i>T. brucei</i> | 66  | 827  | 892  |
| Tbg.972.2.2240 | <i>T. brucei</i> | 598 | 1    | 598  |
| Tbg.972.2.2240 | <i>T. brucei</i> | 239 | 620  | 858  |
| Tbg.972.2.2240 | <i>T. brucei</i> | 46  | 1031 | 1076 |
| Tbg.972.2.2250 | <i>T. brucei</i> | 200 | 1    | 200  |
| Tbg.972.2.2250 | <i>T. brucei</i> | 64  | 293  | 356  |
| Tbg.972.2.2250 | <i>T. brucei</i> | 65  | 387  | 451  |
| Tbg.972.2.2260 | <i>T. brucei</i> | 45  | 49   | 93   |
| Tbg.972.2.2300 | <i>T. brucei</i> | 109 | 241  | 349  |
| Tbg.972.2.2320 | <i>T. brucei</i> | 145 | 48   | 192  |
| Tbg.972.2.2320 | <i>T. brucei</i> | 63  | 424  | 486  |
| Tbg.972.2.2320 | <i>T. brucei</i> | 60  | 632  | 691  |
| Tbg.972.2.2320 | <i>T. brucei</i> | 56  | 754  | 809  |

|                |                  |     |      |      |
|----------------|------------------|-----|------|------|
| Tbg.972.2.2330 | <i>T. brucei</i> | 405 | 330  | 734  |
| Tbg.972.2.2330 | <i>T. brucei</i> | 239 | 753  | 991  |
| Tbg.972.2.2350 | <i>T. brucei</i> | 82  | 1    | 82   |
| Tbg.972.2.2350 | <i>T. brucei</i> | 142 | 85   | 226  |
| Tbg.972.2.2350 | <i>T. brucei</i> | 142 | 229  | 370  |
| Tbg.972.2.2350 | <i>T. brucei</i> | 101 | 373  | 473  |
| Tbg.972.2.2350 | <i>T. brucei</i> | 91  | 494  | 584  |
| Tbg.972.2.2350 | <i>T. brucei</i> | 317 | 613  | 929  |
| Tbg.972.2.2360 | <i>T. brucei</i> | 278 | 17   | 294  |
| Tbg.972.2.2360 | <i>T. brucei</i> | 62  | 382  | 443  |
| Tbg.972.2.2380 | <i>T. brucei</i> | 247 | 247  | 493  |
| Tbg.972.2.2380 | <i>T. brucei</i> | 99  | 838  | 936  |
| Tbg.972.2.2410 | <i>T. brucei</i> | 96  | 279  | 374  |
| Tbg.972.2.2410 | <i>T. brucei</i> | 139 | 549  | 687  |
| Tbg.972.2.2420 | <i>T. brucei</i> | 164 | 61   | 224  |
| Tbg.972.2.2420 | <i>T. brucei</i> | 53  | 283  | 335  |
| Tbg.972.2.2420 | <i>T. brucei</i> | 63  | 345  | 407  |
| Tbg.972.2.2450 | <i>T. brucei</i> | 42  | 117  | 158  |
| Tbg.972.2.2450 | <i>T. brucei</i> | 85  | 327  | 411  |
| Tbg.972.2.2450 | <i>T. brucei</i> | 85  | 327  | 411  |
| Tbg.972.2.2460 | <i>T. brucei</i> | 243 | 521  | 763  |
| Tbg.972.2.2470 | <i>T. brucei</i> | 44  | 33   | 76   |
| Tbg.972.2.2470 | <i>T. brucei</i> | 101 | 143  | 243  |
| Tbg.972.2.2470 | <i>T. brucei</i> | 54  | 353  | 406  |
| Tbg.972.2.2470 | <i>T. brucei</i> | 56  | 538  | 593  |
| Tbg.972.2.2470 | <i>T. brucei</i> | 45  | 674  | 718  |
| Tbg.972.2.2470 | <i>T. brucei</i> | 42  | 854  | 895  |
| Tbg.972.2.2480 | <i>T. brucei</i> | 60  | 1    | 60   |
| Tbg.972.2.2490 | <i>T. brucei</i> | 48  | 1    | 48   |
| Tbg.972.2.2490 | <i>T. brucei</i> | 69  | 168  | 236  |
| Tbg.972.2.2490 | <i>T. brucei</i> | 48  | 331  | 378  |
| Tbg.972.2.2510 | <i>T. brucei</i> | 79  | 55   | 133  |
| Tbg.972.2.2520 | <i>T. brucei</i> | 98  | 80   | 177  |
| Tbg.972.2.2530 | <i>T. brucei</i> | 211 | 1    | 211  |
| Tbg.972.2.2540 | <i>T. brucei</i> | 68  | 56   | 123  |
| Tbg.972.2.2550 | <i>T. brucei</i> | 55  | 99   | 153  |
| Tbg.972.2.2560 | <i>T. brucei</i> | 68  | 1    | 68   |
| Tbg.972.2.2560 | <i>T. brucei</i> | 73  | 110  | 182  |
| Tbg.972.2.2560 | <i>T. brucei</i> | 82  | 348  | 429  |
| Tbg.972.2.2560 | <i>T. brucei</i> | 111 | 664  | 774  |
| Tbg.972.2.2570 | <i>T. brucei</i> | 43  | 37   | 79   |
| Tbg.972.2.2570 | <i>T. brucei</i> | 66  | 189  | 254  |
| Tbg.972.2.2570 | <i>T. brucei</i> | 100 | 372  | 471  |
| Tbg.972.2.2570 | <i>T. brucei</i> | 225 | 650  | 874  |
| Tbg.972.2.2570 | <i>T. brucei</i> | 63  | 917  | 979  |
| Tbg.972.2.2570 | <i>T. brucei</i> | 46  | 1137 | 1182 |
| Tbg.972.2.2580 | <i>T. brucei</i> | 75  | 1    | 75   |

|                |                  |     |      |      |
|----------------|------------------|-----|------|------|
| Tbg.972.2.2580 | <i>T. brucei</i> | 94  | 144  | 237  |
| Tbg.972.2.260  | <i>T. brucei</i> | 76  | 239  | 314  |
| Tbg.972.2.260  | <i>T. brucei</i> | 145 | 474  | 618  |
| Tbg.972.2.260  | <i>T. brucei</i> | 145 | 474  | 618  |
| Tbg.972.2.2600 | <i>T. brucei</i> | 40  | 255  | 294  |
| Tbg.972.2.2600 | <i>T. brucei</i> | 218 | 317  | 534  |
| Tbg.972.2.2600 | <i>T. brucei</i> | 218 | 536  | 753  |
| Tbg.972.2.2600 | <i>T. brucei</i> | 100 | 806  | 905  |
| Tbg.972.2.2610 | <i>T. brucei</i> | 72  | 39   | 110  |
| Tbg.972.2.2610 | <i>T. brucei</i> | 48  | 307  | 354  |
| Tbg.972.2.2610 | <i>T. brucei</i> | 48  | 307  | 354  |
| Tbg.972.2.2700 | <i>T. brucei</i> | 66  | 1    | 66   |
| Tbg.972.2.2710 | <i>T. brucei</i> | 45  | 1    | 45   |
| Tbg.972.2.2710 | <i>T. brucei</i> | 48  | 138  | 185  |
| Tbg.972.2.2740 | <i>T. brucei</i> | 57  | 70   | 126  |
| Tbg.972.2.2740 | <i>T. brucei</i> | 182 | 260  | 441  |
| Tbg.972.2.2760 | <i>T. brucei</i> | 67  | 200  | 266  |
| Tbg.972.2.2770 | <i>T. brucei</i> | 79  | 199  | 277  |
| Tbg.972.2.2780 | <i>T. brucei</i> | 139 | 19   | 157  |
| Tbg.972.2.2780 | <i>T. brucei</i> | 134 | 536  | 669  |
| Tbg.972.2.2810 | <i>T. brucei</i> | 81  | 104  | 184  |
| Tbg.972.2.2810 | <i>T. brucei</i> | 137 | 228  | 364  |
| Tbg.972.2.2810 | <i>T. brucei</i> | 134 | 743  | 876  |
| Tbg.972.2.2840 | <i>T. brucei</i> | 91  | 328  | 418  |
| Tbg.972.2.2840 | <i>T. brucei</i> | 356 | 797  | 1152 |
| Tbg.972.2.2840 | <i>T. brucei</i> | 47  | 1187 | 1233 |
| Tbg.972.2.2840 | <i>T. brucei</i> | 79  | 1262 | 1340 |
| Tbg.972.2.2890 | <i>T. brucei</i> | 133 | 1    | 133  |
| Tbg.972.2.2900 | <i>T. brucei</i> | 41  | 46   | 86   |
| Tbg.972.2.2910 | <i>T. brucei</i> | 68  | 199  | 266  |
| Tbg.972.2.2920 | <i>T. brucei</i> | 79  | 199  | 277  |
| Tbg.972.2.2970 | <i>T. brucei</i> | 41  | 958  | 998  |
| Tbg.972.2.2970 | <i>T. brucei</i> | 48  | 1084 | 1131 |
| Tbg.972.2.2970 | <i>T. brucei</i> | 48  | 1084 | 1131 |
| Tbg.972.2.2980 | <i>T. brucei</i> | 75  | 304  | 378  |
| Tbg.972.2.2990 | <i>T. brucei</i> | 55  | 1    | 55   |
| Tbg.972.2.3000 | <i>T. brucei</i> | 77  | 759  | 835  |
| Tbg.972.2.3010 | <i>T. brucei</i> | 42  | 1    | 42   |
| Tbg.972.2.3010 | <i>T. brucei</i> | 234 | 79   | 312  |
| Tbg.972.2.3010 | <i>T. brucei</i> | 54  | 353  | 406  |
| Tbg.972.2.3020 | <i>T. brucei</i> | 58  | 1    | 58   |
| Tbg.972.2.3030 | <i>T. brucei</i> | 153 | 1    | 153  |
| Tbg.972.2.3030 | <i>T. brucei</i> | 42  | 198  | 239  |
| Tbg.972.2.3030 | <i>T. brucei</i> | 60  | 273  | 332  |
| Tbg.972.2.3030 | <i>T. brucei</i> | 84  | 417  | 500  |
| Tbg.972.2.3050 | <i>T. brucei</i> | 177 | 1    | 177  |
| Tbg.972.2.3050 | <i>T. brucei</i> | 47  | 669  | 715  |

|                |                  |     |      |      |
|----------------|------------------|-----|------|------|
| Tbg.972.2.3060 | <i>T. brucei</i> | 71  | 1    | 71   |
| Tbg.972.2.3090 | <i>T. brucei</i> | 42  | 200  | 241  |
| Tbg.972.2.310  | <i>T. brucei</i> | 48  | 58   | 105  |
| Tbg.972.2.3110 | <i>T. brucei</i> | 59  | 1    | 59   |
| Tbg.972.2.3160 | <i>T. brucei</i> | 43  | 348  | 390  |
| Tbg.972.2.3180 | <i>T. brucei</i> | 42  | 49   | 90   |
| Tbg.972.2.3180 | <i>T. brucei</i> | 188 | 189  | 376  |
| Tbg.972.2.3190 | <i>T. brucei</i> | 91  | 77   | 167  |
| Tbg.972.2.3190 | <i>T. brucei</i> | 54  | 289  | 342  |
| Tbg.972.2.3190 | <i>T. brucei</i> | 54  | 289  | 342  |
| Tbg.972.2.3210 | <i>T. brucei</i> | 41  | 102  | 142  |
| Tbg.972.2.3220 | <i>T. brucei</i> | 391 | 69   | 459  |
| Tbg.972.2.3270 | <i>T. brucei</i> | 67  | 120  | 186  |
| Tbg.972.2.3290 | <i>T. brucei</i> | 124 | 1    | 124  |
| Tbg.972.2.3300 | <i>T. brucei</i> | 165 | 1    | 165  |
| Tbg.972.2.3300 | <i>T. brucei</i> | 44  | 339  | 382  |
| Tbg.972.2.3300 | <i>T. brucei</i> | 70  | 528  | 597  |
| Tbg.972.2.3300 | <i>T. brucei</i> | 105 | 2804 | 2908 |
| Tbg.972.2.3300 | <i>T. brucei</i> | 78  | 3038 | 3115 |
| Tbg.972.2.3300 | <i>T. brucei</i> | 76  | 3334 | 3409 |
| Tbg.972.2.3330 | <i>T. brucei</i> | 51  | 229  | 279  |
| Tbg.972.2.3370 | <i>T. brucei</i> | 42  | 233  | 274  |
| Tbg.972.2.3390 | <i>T. brucei</i> | 46  | 233  | 278  |
| Tbg.972.2.3410 | <i>T. brucei</i> | 46  | 233  | 278  |
| Tbg.972.2.3430 | <i>T. brucei</i> | 46  | 233  | 278  |
| Tbg.972.2.3450 | <i>T. brucei</i> | 46  | 233  | 278  |
| Tbg.972.2.3470 | <i>T. brucei</i> | 42  | 233  | 274  |
| Tbg.972.2.3490 | <i>T. brucei</i> | 42  | 233  | 274  |
| Tbg.972.2.3520 | <i>T. brucei</i> | 42  | 233  | 274  |
| Tbg.972.2.3540 | <i>T. brucei</i> | 46  | 233  | 278  |
| Tbg.972.2.3550 | <i>T. brucei</i> | 46  | 233  | 278  |
| Tbg.972.2.3580 | <i>T. brucei</i> | 46  | 233  | 278  |
| Tbg.972.2.360  | <i>T. brucei</i> | 48  | 120  | 167  |
| Tbg.972.2.360  | <i>T. brucei</i> | 48  | 805  | 852  |
| Tbg.972.2.360  | <i>T. brucei</i> | 97  | 871  | 967  |
| Tbg.972.2.3600 | <i>T. brucei</i> | 42  | 233  | 274  |
| Tbg.972.2.3620 | <i>T. brucei</i> | 40  | 235  | 274  |
| Tbg.972.2.3640 | <i>T. brucei</i> | 42  | 233  | 274  |
| Tbg.972.2.3660 | <i>T. brucei</i> | 42  | 233  | 274  |
| Tbg.972.2.3680 | <i>T. brucei</i> | 46  | 233  | 278  |
| Tbg.972.2.370  | <i>T. brucei</i> | 40  | 283  | 322  |
| Tbg.972.2.3700 | <i>T. brucei</i> | 42  | 233  | 274  |
| Tbg.972.2.3720 | <i>T. brucei</i> | 40  | 236  | 275  |
| Tbg.972.2.3740 | <i>T. brucei</i> | 46  | 233  | 278  |
| Tbg.972.2.3760 | <i>T. brucei</i> | 46  | 233  | 278  |
| Tbg.972.2.380  | <i>T. brucei</i> | 70  | 45   | 114  |
| Tbg.972.2.3820 | <i>T. brucei</i> | 40  | 1224 | 1263 |

|                |                  |     |      |      |
|----------------|------------------|-----|------|------|
| Tbg.972.2.3850 | <i>T. brucei</i> | 286 | 53   | 338  |
| Tbg.972.2.3850 | <i>T. brucei</i> | 227 | 396  | 622  |
| Tbg.972.2.3850 | <i>T. brucei</i> | 51  | 912  | 962  |
| Tbg.972.2.3880 | <i>T. brucei</i> | 115 | 1    | 115  |
| Tbg.972.2.3880 | <i>T. brucei</i> | 53  | 131  | 183  |
| Tbg.972.2.3880 | <i>T. brucei</i> | 47  | 235  | 281  |
| Tbg.972.2.3880 | <i>T. brucei</i> | 40  | 376  | 415  |
| Tbg.972.2.3880 | <i>T. brucei</i> | 66  | 679  | 744  |
| Tbg.972.2.3900 | <i>T. brucei</i> | 164 | 1    | 164  |
| Tbg.972.2.3920 | <i>T. brucei</i> | 56  | 1    | 56   |
| Tbg.972.2.3920 | <i>T. brucei</i> | 52  | 65   | 116  |
| Tbg.972.2.3920 | <i>T. brucei</i> | 167 | 147  | 313  |
| Tbg.972.2.3920 | <i>T. brucei</i> | 125 | 322  | 446  |
| Tbg.972.2.3920 | <i>T. brucei</i> | 154 | 699  | 852  |
| Tbg.972.2.3920 | <i>T. brucei</i> | 65  | 1091 | 1155 |
| Tbg.972.2.3920 | <i>T. brucei</i> | 49  | 1440 | 1488 |
| Tbg.972.2.3930 | <i>T. brucei</i> | 57  | 169  | 225  |
| Tbg.972.2.3930 | <i>T. brucei</i> | 53  | 280  | 332  |
| Tbg.972.2.3930 | <i>T. brucei</i> | 149 | 505  | 653  |
| Tbg.972.2.3930 | <i>T. brucei</i> | 361 | 992  | 1352 |
| Tbg.972.2.3930 | <i>T. brucei</i> | 41  | 1447 | 1487 |
| Tbg.972.2.3930 | <i>T. brucei</i> | 49  | 1663 | 1711 |
| Tbg.972.2.3930 | <i>T. brucei</i> | 45  | 1984 | 2028 |
| Tbg.972.2.3990 | <i>T. brucei</i> | 43  | 1    | 43   |
| Tbg.972.2.400  | <i>T. brucei</i> | 52  | 821  | 872  |
| Tbg.972.2.4000 | <i>T. brucei</i> | 49  | 102  | 150  |
| Tbg.972.2.4040 | <i>T. brucei</i> | 78  | 424  | 501  |
| Tbg.972.2.4040 | <i>T. brucei</i> | 51  | 503  | 553  |
| Tbg.972.2.4040 | <i>T. brucei</i> | 51  | 503  | 553  |
| Tbg.972.2.4050 | <i>T. brucei</i> | 97  | 1    | 97   |
| Tbg.972.2.4050 | <i>T. brucei</i> | 54  | 176  | 229  |
| Tbg.972.2.4050 | <i>T. brucei</i> | 67  | 510  | 576  |
| Tbg.972.2.4050 | <i>T. brucei</i> | 67  | 661  | 727  |
| Tbg.972.2.4050 | <i>T. brucei</i> | 72  | 812  | 883  |
| Tbg.972.2.4050 | <i>T. brucei</i> | 58  | 968  | 1025 |
| Tbg.972.2.4050 | <i>T. brucei</i> | 74  | 1154 | 1227 |
| Tbg.972.2.4050 | <i>T. brucei</i> | 53  | 1320 | 1372 |
| Tbg.972.2.4050 | <i>T. brucei</i> | 241 | 1815 | 2055 |
| Tbg.972.2.4050 | <i>T. brucei</i> | 58  | 2191 | 2248 |
| Tbg.972.2.4050 | <i>T. brucei</i> | 60  | 2518 | 2577 |
| Tbg.972.2.4050 | <i>T. brucei</i> | 193 | 2772 | 2964 |
| Tbg.972.2.4060 | <i>T. brucei</i> | 70  | 1    | 70   |
| Tbg.972.2.4060 | <i>T. brucei</i> | 41  | 139  | 179  |
| Tbg.972.2.4060 | <i>T. brucei</i> | 41  | 139  | 179  |
| Tbg.972.2.4080 | <i>T. brucei</i> | 85  | 53   | 137  |
| Tbg.972.2.4080 | <i>T. brucei</i> | 74  | 142  | 215  |
| Tbg.972.2.4080 | <i>T. brucei</i> | 71  | 1244 | 1314 |



|                |                  |     |     |      |
|----------------|------------------|-----|-----|------|
| Tbg.972.2.4090 | <i>T. brucei</i> | 47  | 1   | 47   |
| Tbg.972.2.410  | <i>T. brucei</i> | 63  | 103 | 165  |
| Tbg.972.2.4120 | <i>T. brucei</i> | 153 | 1   | 153  |
| Tbg.972.2.4120 | <i>T. brucei</i> | 931 | 251 | 1181 |
| Tbg.972.2.4140 | <i>T. brucei</i> | 69  | 303 | 371  |
| Tbg.972.2.4140 | <i>T. brucei</i> | 59  | 458 | 516  |
| Tbg.972.2.4170 | <i>T. brucei</i> | 84  | 21  | 104  |
| Tbg.972.2.4170 | <i>T. brucei</i> | 71  | 292 | 362  |
| Tbg.972.2.4170 | <i>T. brucei</i> | 59  | 376 | 434  |
| Tbg.972.2.4180 | <i>T. brucei</i> | 78  | 91  | 168  |
| Tbg.972.2.4180 | <i>T. brucei</i> | 149 | 349 | 497  |
| Tbg.972.2.4190 | <i>T. brucei</i> | 67  | 354 | 420  |
| Tbg.972.2.4200 | <i>T. brucei</i> | 91  | 406 | 496  |
| Tbg.972.2.4240 | <i>T. brucei</i> | 131 | 155 | 285  |
| Tbg.972.2.4260 | <i>T. brucei</i> | 76  | 1   | 76   |
| Tbg.972.2.4270 | <i>T. brucei</i> | 420 | 1   | 420  |
| Tbg.972.2.4280 | <i>T. brucei</i> | 67  | 430 | 496  |
| Tbg.972.2.4300 | <i>T. brucei</i> | 58  | 231 | 288  |
| Tbg.972.2.4350 | <i>T. brucei</i> | 56  | 234 | 289  |
| Tbg.972.2.4390 | <i>T. brucei</i> | 96  | 83  | 178  |
| Tbg.972.2.4430 | <i>T. brucei</i> | 108 | 108 | 215  |
| Tbg.972.2.4430 | <i>T. brucei</i> | 110 | 352 | 461  |
| Tbg.972.2.4430 | <i>T. brucei</i> | 110 | 352 | 461  |
| Tbg.972.2.480  | <i>T. brucei</i> | 65  | 241 | 305  |
| Tbg.972.2.480  | <i>T. brucei</i> | 104 | 493 | 596  |
| Tbg.972.2.480  | <i>T. brucei</i> | 104 | 493 | 596  |
| Tbg.972.2.520  | <i>T. brucei</i> | 51  | 203 | 253  |
| Tbg.972.2.60   | <i>T. brucei</i> | 91  | 1   | 91   |
| Tbg.972.2.60   | <i>T. brucei</i> | 106 | 123 | 228  |
| Tbg.972.2.670  | <i>T. brucei</i> | 87  | 227 | 313  |
| Tbg.972.2.670  | <i>T. brucei</i> | 62  | 357 | 418  |
| Tbg.972.2.670  | <i>T. brucei</i> | 62  | 357 | 418  |
| Tbg.972.2.680  | <i>T. brucei</i> | 333 | 52  | 384  |
| Tbg.972.2.680  | <i>T. brucei</i> | 385 | 386 | 770  |
| Tbg.972.2.680  | <i>T. brucei</i> | 54  | 802 | 855  |
| Tbg.972.2.680  | <i>T. brucei</i> | 117 | 857 | 973  |
| Tbg.972.2.690  | <i>T. brucei</i> | 143 | 310 | 452  |
| Tbg.972.2.720  | <i>T. brucei</i> | 48  | 59  | 106  |
| Tbg.972.2.760  | <i>T. brucei</i> | 53  | 1   | 53   |
| Tbg.972.2.760  | <i>T. brucei</i> | 175 | 369 | 543  |
| Tbg.972.2.780  | <i>T. brucei</i> | 48  | 220 | 267  |
| Tbg.972.2.780  | <i>T. brucei</i> | 54  | 393 | 446  |
| Tbg.972.2.780  | <i>T. brucei</i> | 46  | 994 | 1039 |
| Tbg.972.2.790  | <i>T. brucei</i> | 71  | 48  | 118  |
| Tbg.972.2.790  | <i>T. brucei</i> | 80  | 184 | 263  |
| Tbg.972.2.800  | <i>T. brucei</i> | 85  | 20  | 104  |
| Tbg.972.2.800  | <i>T. brucei</i> | 75  | 314 | 388  |

|               |                  |     |      |      |
|---------------|------------------|-----|------|------|
| Tbg.972.2.810 | <i>T. brucei</i> | 48  | 385  | 432  |
| Tbg.972.2.810 | <i>T. brucei</i> | 46  | 567  | 612  |
| Tbg.972.2.810 | <i>T. brucei</i> | 59  | 836  | 894  |
| Tbg.972.2.830 | <i>T. brucei</i> | 76  | 1    | 76   |
| Tbg.972.2.840 | <i>T. brucei</i> | 83  | 157  | 239  |
| Tbg.972.2.840 | <i>T. brucei</i> | 50  | 331  | 380  |
| Tbg.972.2.840 | <i>T. brucei</i> | 92  | 519  | 610  |
| Tbg.972.2.840 | <i>T. brucei</i> | 72  | 665  | 736  |
| Tbg.972.2.840 | <i>T. brucei</i> | 46  | 771  | 816  |
| Tbg.972.2.840 | <i>T. brucei</i> | 50  | 975  | 1024 |
| Tbg.972.2.840 | <i>T. brucei</i> | 88  | 2334 | 2421 |
| Tbg.972.2.840 | <i>T. brucei</i> | 73  | 2629 | 2701 |
| Tbg.972.2.840 | <i>T. brucei</i> | 47  | 2977 | 3023 |
| Tbg.972.2.840 | <i>T. brucei</i> | 50  | 3059 | 3108 |
| Tbg.972.2.840 | <i>T. brucei</i> | 64  | 3568 | 3631 |
| Tbg.972.2.840 | <i>T. brucei</i> | 50  | 3780 | 3829 |
| Tbg.972.2.840 | <i>T. brucei</i> | 49  | 4179 | 4227 |
| Tbg.972.2.850 | <i>T. brucei</i> | 59  | 49   | 107  |
| Tbg.972.2.880 | <i>T. brucei</i> | 48  | 58   | 105  |
| Tbg.972.2.890 | <i>T. brucei</i> | 81  | 219  | 299  |
| Tbg.972.2.890 | <i>T. brucei</i> | 60  | 325  | 384  |
| Tbg.972.2.890 | <i>T. brucei</i> | 67  | 459  | 525  |
| Tbg.972.2.890 | <i>T. brucei</i> | 59  | 619  | 677  |
| Tbg.972.2.890 | <i>T. brucei</i> | 62  | 714  | 775  |
| Tbg.972.2.890 | <i>T. brucei</i> | 50  | 865  | 914  |
| Tbg.972.2.890 | <i>T. brucei</i> | 51  | 1084 | 1134 |
| Tbg.972.2.900 | <i>T. brucei</i> | 54  | 135  | 188  |
| Tbg.972.2.900 | <i>T. brucei</i> | 41  | 197  | 237  |
| Tbg.972.2.900 | <i>T. brucei</i> | 41  | 288  | 328  |
| Tbg.972.2.900 | <i>T. brucei</i> | 60  | 565  | 624  |
| Tbg.972.2.910 | <i>T. brucei</i> | 119 | 60   | 178  |
| Tbg.972.2.910 | <i>T. brucei</i> | 71  | 213  | 283  |
| Tbg.972.2.910 | <i>T. brucei</i> | 40  | 368  | 407  |
| Tbg.972.2.910 | <i>T. brucei</i> | 131 | 444  | 574  |
| Tbg.972.2.910 | <i>T. brucei</i> | 52  | 735  | 786  |
| Tbg.972.2.910 | <i>T. brucei</i> | 119 | 803  | 921  |
| Tbg.972.2.910 | <i>T. brucei</i> | 47  | 1353 | 1399 |
| Tbg.972.2.930 | <i>T. brucei</i> | 43  | 224  | 266  |
| Tbg.972.2.930 | <i>T. brucei</i> | 70  | 269  | 338  |
| Tbg.972.2.930 | <i>T. brucei</i> | 137 | 409  | 545  |
| Tbg.972.2.930 | <i>T. brucei</i> | 49  | 577  | 625  |
| Tbg.972.2.930 | <i>T. brucei</i> | 41  | 801  | 841  |
| Tbg.972.2.940 | <i>T. brucei</i> | 66  | 1    | 66   |
| Tbg.972.2.940 | <i>T. brucei</i> | 87  | 84   | 170  |
| Tbg.972.2.950 | <i>T. brucei</i> | 73  | 114  | 186  |
| Tbg.972.2.950 | <i>T. brucei</i> | 46  | 331  | 376  |
| Tbg.972.2.960 | <i>T. brucei</i> | 168 | 83   | 250  |

|               |                  |     |      |      |
|---------------|------------------|-----|------|------|
| Tbg.972.2.960 | <i>T. brucei</i> | 40  | 266  | 305  |
| Tbg.972.2.960 | <i>T. brucei</i> | 46  | 477  | 522  |
| Tbg.972.2.990 | <i>T. brucei</i> | 52  | 388  | 439  |
| Tbg.972.2.990 | <i>T. brucei</i> | 49  | 465  | 513  |
| Tbg.972.2.990 | <i>T. brucei</i> | 49  | 465  | 513  |
| Tbg972.1.100  | <i>T. brucei</i> | 324 | 1    | 324  |
| Tbg972.1.100  | <i>T. brucei</i> | 52  | 697  | 748  |
| Tbg972.1.100  | <i>T. brucei</i> | 105 | 860  | 964  |
| Tbg972.1.1010 | <i>T. brucei</i> | 78  | 1    | 78   |
| Tbg972.1.1010 | <i>T. brucei</i> | 46  | 120  | 165  |
| Tbg972.1.1020 | <i>T. brucei</i> | 48  | 83   | 130  |
| Tbg972.1.1030 | <i>T. brucei</i> | 98  | 1    | 98   |
| Tbg972.1.1030 | <i>T. brucei</i> | 61  | 112  | 172  |
| Tbg972.1.1030 | <i>T. brucei</i> | 42  | 180  | 221  |
| Tbg972.1.1040 | <i>T. brucei</i> | 294 | 1    | 294  |
| Tbg972.1.1040 | <i>T. brucei</i> | 88  | 310  | 397  |
| Tbg972.1.1050 | <i>T. brucei</i> | 77  | 1    | 77   |
| Tbg972.1.1050 | <i>T. brucei</i> | 370 | 152  | 521  |
| Tbg972.1.1050 | <i>T. brucei</i> | 41  | 552  | 592  |
| Tbg972.1.1070 | <i>T. brucei</i> | 226 | 635  | 860  |
| Tbg972.1.1070 | <i>T. brucei</i> | 87  | 870  | 956  |
| Tbg972.1.1070 | <i>T. brucei</i> | 102 | 1276 | 1377 |
| Tbg972.1.1080 | <i>T. brucei</i> | 134 | 1    | 134  |
| Tbg972.1.1080 | <i>T. brucei</i> | 45  | 144  | 188  |
| Tbg972.1.1080 | <i>T. brucei</i> | 60  | 235  | 294  |
| Tbg972.1.1080 | <i>T. brucei</i> | 132 | 318  | 449  |
| Tbg972.1.1080 | <i>T. brucei</i> | 78  | 470  | 547  |
| Tbg972.1.1080 | <i>T. brucei</i> | 60  | 623  | 682  |
| Tbg972.1.1080 | <i>T. brucei</i> | 42  | 700  | 741  |
| Tbg972.1.1080 | <i>T. brucei</i> | 48  | 847  | 894  |
| Tbg972.1.1080 | <i>T. brucei</i> | 51  | 1037 | 1087 |
| Tbg972.1.1100 | <i>T. brucei</i> | 49  | 184  | 232  |
| Tbg972.1.1100 | <i>T. brucei</i> | 67  | 1009 | 1075 |
| Tbg972.1.1100 | <i>T. brucei</i> | 67  | 1009 | 1075 |
| Tbg972.1.1110 | <i>T. brucei</i> | 86  | 106  | 191  |
| Tbg972.1.1110 | <i>T. brucei</i> | 158 | 284  | 441  |
| Tbg972.1.1120 | <i>T. brucei</i> | 60  | 1    | 60   |
| Tbg972.1.1120 | <i>T. brucei</i> | 77  | 479  | 555  |
| Tbg972.1.1120 | <i>T. brucei</i> | 70  | 682  | 751  |
| Tbg972.1.1120 | <i>T. brucei</i> | 112 | 1335 | 1446 |
| Tbg972.1.1120 | <i>T. brucei</i> | 85  | 1631 | 1715 |
| Tbg972.1.1130 | <i>T. brucei</i> | 66  | 50   | 115  |
| Tbg972.1.1130 | <i>T. brucei</i> | 45  | 152  | 196  |
| Tbg972.1.1130 | <i>T. brucei</i> | 114 | 261  | 374  |
| Tbg972.1.1130 | <i>T. brucei</i> | 115 | 416  | 530  |
| Tbg972.1.1130 | <i>T. brucei</i> | 63  | 537  | 599  |
| Tbg972.1.1140 | <i>T. brucei</i> | 41  | 1    | 41   |

|               |                  |     |      |      |
|---------------|------------------|-----|------|------|
| Tbg972.1.1140 | <i>T. brucei</i> | 48  | 94   | 141  |
| Tbg972.1.1140 | <i>T. brucei</i> | 48  | 94   | 141  |
| Tbg972.1.1180 | <i>T. brucei</i> | 84  | 68   | 151  |
| Tbg972.1.1180 | <i>T. brucei</i> | 60  | 218  | 277  |
| Tbg972.1.1180 | <i>T. brucei</i> | 60  | 218  | 277  |
| Tbg972.1.120  | <i>T. brucei</i> | 69  | 1    | 69   |
| Tbg972.1.120  | <i>T. brucei</i> | 102 | 293  | 394  |
| Tbg972.1.120  | <i>T. brucei</i> | 45  | 470  | 514  |
| Tbg972.1.1210 | <i>T. brucei</i> | 58  | 1    | 58   |
| Tbg972.1.1230 | <i>T. brucei</i> | 390 | 1    | 390  |
| Tbg972.1.1250 | <i>T. brucei</i> | 66  | 1    | 66   |
| Tbg972.1.1280 | <i>T. brucei</i> | 54  | 10   | 63   |
| Tbg972.1.1280 | <i>T. brucei</i> | 60  | 237  | 296  |
| Tbg972.1.1280 | <i>T. brucei</i> | 40  | 819  | 858  |
| Tbg972.1.1280 | <i>T. brucei</i> | 94  | 1034 | 1127 |
| Tbg972.1.1280 | <i>T. brucei</i> | 68  | 1192 | 1259 |
| Tbg972.1.1280 | <i>T. brucei</i> | 41  | 1318 | 1358 |
| Tbg972.1.1290 | <i>T. brucei</i> | 151 | 134  | 284  |
| Tbg972.1.130  | <i>T. brucei</i> | 43  | 54   | 96   |
| Tbg972.1.130  | <i>T. brucei</i> | 123 | 121  | 243  |
| Tbg972.1.130  | <i>T. brucei</i> | 123 | 121  | 243  |
| Tbg972.1.1330 | <i>T. brucei</i> | 113 | 1    | 113  |
| Tbg972.1.140  | <i>T. brucei</i> | 49  | 362  | 410  |
| Tbg972.1.1420 | <i>T. brucei</i> | 57  | 1    | 57   |
| Tbg972.1.1430 | <i>T. brucei</i> | 57  | 1    | 57   |
| Tbg972.1.1440 | <i>T. brucei</i> | 57  | 1    | 57   |
| Tbg972.1.1450 | <i>T. brucei</i> | 57  | 1    | 57   |
| Tbg972.1.1460 | <i>T. brucei</i> | 57  | 1    | 57   |
| Tbg972.1.1480 | <i>T. brucei</i> | 57  | 1    | 57   |
| Tbg972.1.150  | <i>T. brucei</i> | 59  | 362  | 420  |
| Tbg972.1.1500 | <i>T. brucei</i> | 57  | 1    | 57   |
| Tbg972.1.1520 | <i>T. brucei</i> | 57  | 1    | 57   |
| Tbg972.1.1540 | <i>T. brucei</i> | 58  | 489  | 546  |
| Tbg972.1.1550 | <i>T. brucei</i> | 47  | 129  | 175  |
| Tbg972.1.1550 | <i>T. brucei</i> | 56  | 309  | 364  |
| Tbg972.1.1560 | <i>T. brucei</i> | 241 | 1    | 241  |
| Tbg972.1.1560 | <i>T. brucei</i> | 148 | 529  | 676  |
| Tbg972.1.1570 | <i>T. brucei</i> | 321 | 1    | 321  |
| Tbg972.1.160  | <i>T. brucei</i> | 64  | 114  | 177  |
| Tbg972.1.1610 | <i>T. brucei</i> | 156 | 129  | 284  |
| Tbg972.1.1610 | <i>T. brucei</i> | 242 | 348  | 589  |
| Tbg972.1.1610 | <i>T. brucei</i> | 125 | 591  | 715  |
| Tbg972.1.1620 | <i>T. brucei</i> | 66  | 1    | 66   |
| Tbg972.1.1640 | <i>T. brucei</i> | 168 | 1    | 168  |
| Tbg972.1.1660 | <i>T. brucei</i> | 112 | 188  | 299  |
| Tbg972.1.1660 | <i>T. brucei</i> | 87  | 301  | 387  |
| Tbg972.1.1670 | <i>T. brucei</i> | 224 | 1    | 224  |

|               |                  |     |      |      |
|---------------|------------------|-----|------|------|
| Tbg972.1.1680 | <i>T. brucei</i> | 50  | 270  | 319  |
| Tbg972.1.1680 | <i>T. brucei</i> | 48  | 605  | 652  |
| Tbg972.1.1680 | <i>T. brucei</i> | 48  | 605  | 652  |
| Tbg972.1.1690 | <i>T. brucei</i> | 51  | 270  | 320  |
| Tbg972.1.1690 | <i>T. brucei</i> | 48  | 605  | 652  |
| Tbg972.1.1690 | <i>T. brucei</i> | 48  | 605  | 652  |
| Tbg972.1.1710 | <i>T. brucei</i> | 51  | 270  | 320  |
| Tbg972.1.1710 | <i>T. brucei</i> | 48  | 605  | 652  |
| Tbg972.1.1710 | <i>T. brucei</i> | 48  | 605  | 652  |
| Tbg972.1.1720 | <i>T. brucei</i> | 64  | 1    | 64   |
| Tbg972.1.1740 | <i>T. brucei</i> | 48  | 1    | 48   |
| Tbg972.1.1770 | <i>T. brucei</i> | 75  | 172  | 246  |
| Tbg972.1.180  | <i>T. brucei</i> | 75  | 288  | 362  |
| Tbg972.1.1800 | <i>T. brucei</i> | 80  | 76   | 155  |
| Tbg972.1.1800 | <i>T. brucei</i> | 51  | 619  | 669  |
| Tbg972.1.1800 | <i>T. brucei</i> | 56  | 693  | 748  |
| Tbg972.1.1800 | <i>T. brucei</i> | 55  | 809  | 863  |
| Tbg972.1.1800 | <i>T. brucei</i> | 61  | 869  | 929  |
| Tbg972.1.1800 | <i>T. brucei</i> | 50  | 975  | 1024 |
| Tbg972.1.1860 | <i>T. brucei</i> | 155 | 1    | 155  |
| Tbg972.1.1870 | <i>T. brucei</i> | 128 | 1    | 128  |
| Tbg972.1.1870 | <i>T. brucei</i> | 147 | 145  | 291  |
| Tbg972.1.1870 | <i>T. brucei</i> | 90  | 324  | 413  |
| Tbg972.1.1890 | <i>T. brucei</i> | 54  | 200  | 253  |
| Tbg972.1.190  | <i>T. brucei</i> | 506 | 213  | 718  |
| Tbg972.1.190  | <i>T. brucei</i> | 58  | 776  | 833  |
| Tbg972.1.1900 | <i>T. brucei</i> | 42  | 398  | 439  |
| Tbg972.1.1920 | <i>T. brucei</i> | 65  | 241  | 305  |
| Tbg972.1.1930 | <i>T. brucei</i> | 69  | 173  | 241  |
| Tbg972.1.1960 | <i>T. brucei</i> | 69  | 102  | 170  |
| Tbg972.1.1980 | <i>T. brucei</i> | 123 | 66   | 188  |
| Tbg972.1.20   | <i>T. brucei</i> | 45  | 856  | 900  |
| Tbg972.1.2000 | <i>T. brucei</i> | 76  | 1    | 76   |
| Tbg972.1.2000 | <i>T. brucei</i> | 84  | 575  | 658  |
| Tbg972.1.2000 | <i>T. brucei</i> | 130 | 660  | 789  |
| Tbg972.1.2000 | <i>T. brucei</i> | 102 | 1003 | 1104 |
| Tbg972.1.2000 | <i>T. brucei</i> | 92  | 1140 | 1231 |
| Tbg972.1.2000 | <i>T. brucei</i> | 81  | 1286 | 1366 |
| Tbg972.1.2000 | <i>T. brucei</i> | 81  | 1544 | 1624 |
| Tbg972.1.2000 | <i>T. brucei</i> | 49  | 1650 | 1698 |
| Tbg972.1.2010 | <i>T. brucei</i> | 49  | 1146 | 1194 |
| Tbg972.1.2010 | <i>T. brucei</i> | 52  | 1506 | 1557 |
| Tbg972.1.2010 | <i>T. brucei</i> | 52  | 1506 | 1557 |
| Tbg972.1.2020 | <i>T. brucei</i> | 54  | 127  | 180  |
| Tbg972.1.2020 | <i>T. brucei</i> | 43  | 308  | 350  |
| Tbg972.1.2020 | <i>T. brucei</i> | 66  | 417  | 482  |
| Tbg972.1.2020 | <i>T. brucei</i> | 56  | 630  | 685  |

|               |                  |     |      |      |
|---------------|------------------|-----|------|------|
| Tbg972.1.2020 | <i>T. brucei</i> | 170 | 742  | 911  |
| Tbg972.1.2040 | <i>T. brucei</i> | 46  | 531  | 576  |
| Tbg972.1.2040 | <i>T. brucei</i> | 119 | 695  | 813  |
| Tbg972.1.2040 | <i>T. brucei</i> | 43  | 830  | 872  |
| Tbg972.1.2040 | <i>T. brucei</i> | 93  | 896  | 988  |
| Tbg972.1.2060 | <i>T. brucei</i> | 73  | 343  | 415  |
| Tbg972.1.2070 | <i>T. brucei</i> | 107 | 88   | 194  |
| Tbg972.1.2070 | <i>T. brucei</i> | 51  | 202  | 252  |
| Tbg972.1.2080 | <i>T. brucei</i> | 75  | 1    | 75   |
| Tbg972.1.210  | <i>T. brucei</i> | 43  | 444  | 486  |
| Tbg972.1.210  | <i>T. brucei</i> | 136 | 540  | 675  |
| Tbg972.1.210  | <i>T. brucei</i> | 136 | 540  | 675  |
| Tbg972.1.2120 | <i>T. brucei</i> | 105 | 1    | 105  |
| Tbg972.1.2150 | <i>T. brucei</i> | 56  | 68   | 123  |
| Tbg972.1.2150 | <i>T. brucei</i> | 50  | 241  | 290  |
| Tbg972.1.2150 | <i>T. brucei</i> | 50  | 241  | 290  |
| Tbg972.1.2160 | <i>T. brucei</i> | 131 | 49   | 179  |
| Tbg972.1.2160 | <i>T. brucei</i> | 91  | 352  | 442  |
| Tbg972.1.2170 | <i>T. brucei</i> | 74  | 1    | 74   |
| Tbg972.1.2170 | <i>T. brucei</i> | 47  | 87   | 133  |
| Tbg972.1.2170 | <i>T. brucei</i> | 46  | 208  | 253  |
| Tbg972.1.2170 | <i>T. brucei</i> | 50  | 372  | 421  |
| Tbg972.1.2170 | <i>T. brucei</i> | 133 | 463  | 595  |
| Tbg972.1.2170 | <i>T. brucei</i> | 132 | 655  | 786  |
| Tbg972.1.2190 | <i>T. brucei</i> | 50  | 59   | 108  |
| Tbg972.1.2240 | <i>T. brucei</i> | 64  | 248  | 311  |
| Tbg972.1.2360 | <i>T. brucei</i> | 72  | 31   | 102  |
| Tbg972.1.240  | <i>T. brucei</i> | 48  | 285  | 332  |
| Tbg972.1.2400 | <i>T. brucei</i> | 208 | 13   | 220  |
| Tbg972.1.2400 | <i>T. brucei</i> | 91  | 273  | 363  |
| Tbg972.1.2400 | <i>T. brucei</i> | 44  | 507  | 550  |
| Tbg972.1.2420 | <i>T. brucei</i> | 48  | 1    | 48   |
| Tbg972.1.2420 | <i>T. brucei</i> | 97  | 203  | 299  |
| Tbg972.1.2420 | <i>T. brucei</i> | 70  | 598  | 667  |
| Tbg972.1.2420 | <i>T. brucei</i> | 150 | 724  | 873  |
| Tbg972.1.2440 | <i>T. brucei</i> | 610 | 1    | 610  |
| Tbg972.1.2440 | <i>T. brucei</i> | 304 | 1374 | 1677 |
| Tbg972.1.2470 | <i>T. brucei</i> | 92  | 109  | 200  |
| Tbg972.1.2470 | <i>T. brucei</i> | 89  | 205  | 293  |
| Tbg972.1.2470 | <i>T. brucei</i> | 56  | 388  | 443  |
| Tbg972.1.2470 | <i>T. brucei</i> | 41  | 846  | 886  |
| Tbg972.1.2500 | <i>T. brucei</i> | 43  | 1    | 43   |
| Tbg972.1.2500 | <i>T. brucei</i> | 367 | 69   | 435  |
| Tbg972.1.2500 | <i>T. brucei</i> | 98  | 451  | 548  |
| Tbg972.1.2500 | <i>T. brucei</i> | 309 | 587  | 895  |
| Tbg972.1.2560 | <i>T. brucei</i> | 739 | 14   | 752  |
| Tbg972.1.2560 | <i>T. brucei</i> | 59  | 922  | 980  |

|               |                  |     |      |      |
|---------------|------------------|-----|------|------|
| Tbg972.1.260  | <i>T. brucei</i> | 92  | 68   | 159  |
| Tbg972.1.2600 | <i>T. brucei</i> | 474 | 70   | 543  |
| Tbg972.1.2660 | <i>T. brucei</i> | 41  | 1    | 41   |
| Tbg972.1.2680 | <i>T. brucei</i> | 43  | 1    | 43   |
| Tbg972.1.270  | <i>T. brucei</i> | 52  | 190  | 241  |
| Tbg972.1.2700 | <i>T. brucei</i> | 42  | 126  | 167  |
| Tbg972.1.2710 | <i>T. brucei</i> | 42  | 102  | 143  |
| Tbg972.1.2730 | <i>T. brucei</i> | 103 | 175  | 277  |
| Tbg972.1.2730 | <i>T. brucei</i> | 156 | 589  | 744  |
| Tbg972.1.2770 | <i>T. brucei</i> | 83  | 32   | 114  |
| Tbg972.1.2770 | <i>T. brucei</i> | 46  | 135  | 180  |
| Tbg972.1.2780 | <i>T. brucei</i> | 89  | 219  | 307  |
| Tbg972.1.2780 | <i>T. brucei</i> | 105 | 322  | 426  |
| Tbg972.1.2800 | <i>T. brucei</i> | 48  | 1    | 48   |
| Tbg972.1.2800 | <i>T. brucei</i> | 91  | 85   | 175  |
| Tbg972.1.2800 | <i>T. brucei</i> | 130 | 555  | 684  |
| Tbg972.1.2800 | <i>T. brucei</i> | 41  | 722  | 762  |
| Tbg972.1.2850 | <i>T. brucei</i> | 86  | 35   | 120  |
| Tbg972.1.2850 | <i>T. brucei</i> | 277 | 127  | 403  |
| Tbg972.1.2860 | <i>T. brucei</i> | 577 | 89   | 665  |
| Tbg972.1.2860 | <i>T. brucei</i> | 187 | 701  | 887  |
| Tbg972.1.2860 | <i>T. brucei</i> | 158 | 989  | 1146 |
| Tbg972.1.2860 | <i>T. brucei</i> | 42  | 1176 | 1217 |
| Tbg972.1.2860 | <i>T. brucei</i> | 103 | 1342 | 1444 |
| Tbg972.1.2880 | <i>T. brucei</i> | 139 | 1    | 139  |
| Tbg972.1.2880 | <i>T. brucei</i> | 43  | 171  | 213  |
| Tbg972.1.2880 | <i>T. brucei</i> | 47  | 256  | 302  |
| Tbg972.1.2880 | <i>T. brucei</i> | 44  | 506  | 549  |
| Tbg972.1.290  | <i>T. brucei</i> | 42  | 2781 | 2822 |
| Tbg972.1.290  | <i>T. brucei</i> | 79  | 3205 | 3283 |
| Tbg972.1.290  | <i>T. brucei</i> | 545 | 3724 | 4268 |
| Tbg972.1.2910 | <i>T. brucei</i> | 58  | 61   | 118  |
| Tbg972.1.2910 | <i>T. brucei</i> | 78  | 242  | 319  |
| Tbg972.1.2910 | <i>T. brucei</i> | 78  | 242  | 319  |
| Tbg972.1.2920 | <i>T. brucei</i> | 71  | 170  | 240  |
| Tbg972.1.2920 | <i>T. brucei</i> | 69  | 462  | 530  |
| Tbg972.1.2940 | <i>T. brucei</i> | 162 | 1    | 162  |
| Tbg972.1.2940 | <i>T. brucei</i> | 115 | 174  | 288  |
| Tbg972.1.2950 | <i>T. brucei</i> | 194 | 35   | 228  |
| Tbg972.1.2950 | <i>T. brucei</i> | 53  | 280  | 332  |
| Tbg972.1.2950 | <i>T. brucei</i> | 99  | 342  | 440  |
| Tbg972.1.2950 | <i>T. brucei</i> | 108 | 512  | 619  |
| Tbg972.1.2950 | <i>T. brucei</i> | 63  | 716  | 778  |
| Tbg972.1.2980 | <i>T. brucei</i> | 42  | 47   | 88   |
| Tbg972.1.2980 | <i>T. brucei</i> | 110 | 628  | 737  |
| Tbg972.1.2980 | <i>T. brucei</i> | 110 | 628  | 737  |
| Tbg972.1.30   | <i>T. brucei</i> | 97  | 346  | 442  |

|               |                  |     |     |      |
|---------------|------------------|-----|-----|------|
| Tbg972.1.300  | <i>T. brucei</i> | 50  | 207 | 256  |
| Tbg972.1.3000 | <i>T. brucei</i> | 45  | 23  | 67   |
| Tbg972.1.3000 | <i>T. brucei</i> | 107 | 188 | 294  |
| Tbg972.1.3000 | <i>T. brucei</i> | 127 | 317 | 443  |
| Tbg972.1.3040 | <i>T. brucei</i> | 41  | 1   | 41   |
| Tbg972.1.3050 | <i>T. brucei</i> | 156 | 1   | 156  |
| Tbg972.1.3050 | <i>T. brucei</i> | 76  | 180 | 255  |
| Tbg972.1.3050 | <i>T. brucei</i> | 176 | 292 | 467  |
| Tbg972.1.3050 | <i>T. brucei</i> | 70  | 509 | 578  |
| Tbg972.1.3050 | <i>T. brucei</i> | 48  | 640 | 687  |
| Tbg972.1.3070 | <i>T. brucei</i> | 58  | 23  | 80   |
| Tbg972.1.3070 | <i>T. brucei</i> | 45  | 87  | 131  |
| Tbg972.1.3070 | <i>T. brucei</i> | 42  | 190 | 231  |
| Tbg972.1.3080 | <i>T. brucei</i> | 135 | 68  | 202  |
| Tbg972.1.3130 | <i>T. brucei</i> | 63  | 1   | 63   |
| Tbg972.1.3130 | <i>T. brucei</i> | 48  | 103 | 150  |
| Tbg972.1.3130 | <i>T. brucei</i> | 48  | 103 | 150  |
| Tbg972.1.3160 | <i>T. brucei</i> | 62  | 19  | 80   |
| Tbg972.1.3160 | <i>T. brucei</i> | 45  | 87  | 131  |
| Tbg972.1.3160 | <i>T. brucei</i> | 42  | 190 | 231  |
| Tbg972.1.3160 | <i>T. brucei</i> | 136 | 316 | 451  |
| Tbg972.1.3170 | <i>T. brucei</i> | 58  | 23  | 80   |
| Tbg972.1.3170 | <i>T. brucei</i> | 45  | 87  | 131  |
| Tbg972.1.3170 | <i>T. brucei</i> | 43  | 189 | 231  |
| Tbg972.1.3170 | <i>T. brucei</i> | 136 | 316 | 451  |
| Tbg972.1.3180 | <i>T. brucei</i> | 62  | 23  | 84   |
| Tbg972.1.3180 | <i>T. brucei</i> | 46  | 86  | 131  |
| Tbg972.1.3180 | <i>T. brucei</i> | 41  | 191 | 231  |
| Tbg972.1.3180 | <i>T. brucei</i> | 136 | 316 | 451  |
| Tbg972.1.3190 | <i>T. brucei</i> | 62  | 19  | 80   |
| Tbg972.1.3190 | <i>T. brucei</i> | 45  | 87  | 131  |
| Tbg972.1.3190 | <i>T. brucei</i> | 42  | 190 | 231  |
| Tbg972.1.3220 | <i>T. brucei</i> | 319 | 1   | 319  |
| Tbg972.1.3230 | <i>T. brucei</i> | 56  | 36  | 91   |
| Tbg972.1.3240 | <i>T. brucei</i> | 63  | 459 | 521  |
| Tbg972.1.3260 | <i>T. brucei</i> | 93  | 206 | 298  |
| Tbg972.1.3260 | <i>T. brucei</i> | 46  | 841 | 886  |
| Tbg972.1.3260 | <i>T. brucei</i> | 44  | 964 | 1007 |
| Tbg972.1.3310 | <i>T. brucei</i> | 45  | 1   | 45   |
| Tbg972.1.3310 | <i>T. brucei</i> | 251 | 153 | 403  |
| Tbg972.1.3340 | <i>T. brucei</i> | 58  | 243 | 300  |
| Tbg972.1.340  | <i>T. brucei</i> | 43  | 87  | 129  |
| Tbg972.1.350  | <i>T. brucei</i> | 49  | 1   | 49   |
| Tbg972.1.370  | <i>T. brucei</i> | 203 | 65  | 267  |
| Tbg972.1.370  | <i>T. brucei</i> | 45  | 299 | 343  |
| Tbg972.1.40   | <i>T. brucei</i> | 72  | 1   | 72   |
| Tbg972.1.400  | <i>T. brucei</i> | 140 | 47  | 186  |



|              |                  |     |      |      |
|--------------|------------------|-----|------|------|
| Tbg972.1.410 | <i>T. brucei</i> | 42  | 307  | 348  |
| Tbg972.1.410 | <i>T. brucei</i> | 87  | 354  | 440  |
| Tbg972.1.420 | <i>T. brucei</i> | 106 | 64   | 169  |
| Tbg972.1.430 | <i>T. brucei</i> | 53  | 1066 | 1118 |
| Tbg972.1.450 | <i>T. brucei</i> | 45  | 156  | 200  |
| Tbg972.1.450 | <i>T. brucei</i> | 53  | 240  | 292  |
| Tbg972.1.450 | <i>T. brucei</i> | 64  | 422  | 485  |
| Tbg972.1.460 | <i>T. brucei</i> | 99  | 11   | 109  |
| Tbg972.1.470 | <i>T. brucei</i> | 907 | 1    | 907  |
| Tbg972.1.480 | <i>T. brucei</i> | 136 | 1    | 136  |
| Tbg972.1.50  | <i>T. brucei</i> | 74  | 251  | 324  |
| Tbg972.1.520 | <i>T. brucei</i> | 120 | 1    | 120  |
| Tbg972.1.520 | <i>T. brucei</i> | 61  | 136  | 196  |
| Tbg972.1.520 | <i>T. brucei</i> | 61  | 136  | 196  |
| Tbg972.1.540 | <i>T. brucei</i> | 57  | 1    | 57   |
| Tbg972.1.560 | <i>T. brucei</i> | 66  | 1    | 66   |
| Tbg972.1.570 | <i>T. brucei</i> | 41  | 50   | 90   |
| Tbg972.1.570 | <i>T. brucei</i> | 59  | 129  | 187  |
| Tbg972.1.570 | <i>T. brucei</i> | 74  | 227  | 300  |
| Tbg972.1.610 | <i>T. brucei</i> | 61  | 1    | 61   |
| Tbg972.1.620 | <i>T. brucei</i> | 41  | 65   | 105  |
| Tbg972.1.620 | <i>T. brucei</i> | 68  | 156  | 223  |
| Tbg972.1.620 | <i>T. brucei</i> | 68  | 156  | 223  |
| Tbg972.1.630 | <i>T. brucei</i> | 44  | 289  | 332  |
| Tbg972.1.630 | <i>T. brucei</i> | 40  | 367  | 406  |
| Tbg972.1.630 | <i>T. brucei</i> | 40  | 367  | 406  |
| Tbg972.1.640 | <i>T. brucei</i> | 44  | 120  | 163  |
| Tbg972.1.640 | <i>T. brucei</i> | 54  | 335  | 388  |
| Tbg972.1.640 | <i>T. brucei</i> | 49  | 402  | 450  |
| Tbg972.1.640 | <i>T. brucei</i> | 56  | 636  | 691  |
| Tbg972.1.650 | <i>T. brucei</i> | 77  | 1    | 77   |
| Tbg972.1.650 | <i>T. brucei</i> | 77  | 435  | 511  |
| Tbg972.1.650 | <i>T. brucei</i> | 251 | 637  | 887  |
| Tbg972.1.670 | <i>T. brucei</i> | 67  | 294  | 360  |
| Tbg972.1.670 | <i>T. brucei</i> | 73  | 607  | 679  |
| Tbg972.1.670 | <i>T. brucei</i> | 73  | 607  | 679  |
| Tbg972.1.690 | <i>T. brucei</i> | 44  | 142  | 185  |
| Tbg972.1.70  | <i>T. brucei</i> | 73  | 251  | 323  |
| Tbg972.1.720 | <i>T. brucei</i> | 90  | 113  | 202  |
| Tbg972.1.720 | <i>T. brucei</i> | 213 | 454  | 666  |
| Tbg972.1.730 | <i>T. brucei</i> | 44  | 61   | 104  |
| Tbg972.1.740 | <i>T. brucei</i> | 185 | 379  | 563  |
| Tbg972.1.750 | <i>T. brucei</i> | 48  | 210  | 257  |
| Tbg972.1.750 | <i>T. brucei</i> | 77  | 313  | 389  |
| Tbg972.1.750 | <i>T. brucei</i> | 147 | 483  | 629  |
| Tbg972.1.760 | <i>T. brucei</i> | 91  | 111  | 201  |
| Tbg972.1.760 | <i>T. brucei</i> | 85  | 304  | 388  |

|              |                  |     |      |      |
|--------------|------------------|-----|------|------|
| Tbg972.1.760 | <i>T. brucei</i> | 40  | 390  | 429  |
| Tbg972.1.760 | <i>T. brucei</i> | 65  | 1062 | 1126 |
| Tbg972.1.760 | <i>T. brucei</i> | 84  | 1659 | 1742 |
| Tbg972.1.770 | <i>T. brucei</i> | 106 | 83   | 188  |
| Tbg972.1.780 | <i>T. brucei</i> | 41  | 1    | 41   |
| Tbg972.1.780 | <i>T. brucei</i> | 44  | 312  | 355  |
| Tbg972.1.780 | <i>T. brucei</i> | 44  | 312  | 355  |
| Tbg972.1.790 | <i>T. brucei</i> | 59  | 667  | 725  |
| Tbg972.1.80  | <i>T. brucei</i> | 50  | 131  | 180  |
| Tbg972.1.810 | <i>T. brucei</i> | 79  | 132  | 210  |
| Tbg972.1.810 | <i>T. brucei</i> | 56  | 229  | 284  |
| Tbg972.1.810 | <i>T. brucei</i> | 63  | 508  | 570  |
| Tbg972.1.810 | <i>T. brucei</i> | 49  | 723  | 771  |
| Tbg972.1.810 | <i>T. brucei</i> | 69  | 829  | 897  |
| Tbg972.1.810 | <i>T. brucei</i> | 56  | 1027 | 1082 |
| Tbg972.1.810 | <i>T. brucei</i> | 79  | 1222 | 1300 |
| Tbg972.1.810 | <i>T. brucei</i> | 48  | 1357 | 1404 |
| Tbg972.1.830 | <i>T. brucei</i> | 43  | 162  | 204  |
| Tbg972.1.830 | <i>T. brucei</i> | 71  | 316  | 386  |
| Tbg972.1.830 | <i>T. brucei</i> | 78  | 428  | 505  |
| Tbg972.1.840 | <i>T. brucei</i> | 42  | 91   | 132  |
| Tbg972.1.850 | <i>T. brucei</i> | 44  | 128  | 171  |
| Tbg972.1.850 | <i>T. brucei</i> | 43  | 295  | 337  |
| Tbg972.1.850 | <i>T. brucei</i> | 43  | 295  | 337  |
| Tbg972.1.860 | <i>T. brucei</i> | 108 | 62   | 169  |
| Tbg972.1.880 | <i>T. brucei</i> | 45  | 312  | 356  |
| Tbg972.1.890 | <i>T. brucei</i> | 66  | 1    | 66   |
| Tbg972.1.890 | <i>T. brucei</i> | 73  | 165  | 237  |
| Tbg972.1.900 | <i>T. brucei</i> | 63  | 46   | 108  |
| Tbg972.1.900 | <i>T. brucei</i> | 58  | 435  | 492  |
| Tbg972.1.900 | <i>T. brucei</i> | 44  | 537  | 580  |
| Tbg972.1.900 | <i>T. brucei</i> | 68  | 722  | 789  |
| Tbg972.1.910 | <i>T. brucei</i> | 222 | 1    | 222  |
| Tbg972.1.910 | <i>T. brucei</i> | 41  | 420  | 460  |
| Tbg972.1.920 | <i>T. brucei</i> | 66  | 1    | 66   |
| Tbg972.1.920 | <i>T. brucei</i> | 79  | 501  | 579  |
| Tbg972.1.920 | <i>T. brucei</i> | 49  | 1029 | 1077 |
| Tbg972.1.920 | <i>T. brucei</i> | 79  | 1422 | 1500 |
| Tbg972.1.920 | <i>T. brucei</i> | 145 | 1641 | 1785 |
| Tbg972.1.930 | <i>T. brucei</i> | 48  | 122  | 169  |
| Tbg972.1.930 | <i>T. brucei</i> | 49  | 245  | 293  |
| Tbg972.1.930 | <i>T. brucei</i> | 52  | 306  | 357  |
| Tbg972.1.930 | <i>T. brucei</i> | 53  | 378  | 430  |
| Tbg972.1.940 | <i>T. brucei</i> | 42  | 135  | 176  |
| Tbg972.1.940 | <i>T. brucei</i> | 56  | 255  | 310  |
| Tbg972.1.940 | <i>T. brucei</i> | 100 | 431  | 530  |
| Tbg972.1.940 | <i>T. brucei</i> | 158 | 536  | 693  |

|                 |                  |     |      |      |
|-----------------|------------------|-----|------|------|
| Tbg972.1.950    | <i>T. brucei</i> | 162 | 1    | 162  |
| Tbg972.1.950    | <i>T. brucei</i> | 613 | 219  | 831  |
| Tbg972.1.970    | <i>T. brucei</i> | 353 | 118  | 470  |
| Tbg972.10.10    | <i>T. brucei</i> | 53  | 138  | 190  |
| Tbg972.10.100   | <i>T. brucei</i> | 116 | 159  | 274  |
| Tbg972.10.1000  | <i>T. brucei</i> | 62  | 173  | 234  |
| Tbg972.10.1000  | <i>T. brucei</i> | 118 | 679  | 796  |
| Tbg972.10.10000 | <i>T. brucei</i> | 98  | 151  | 248  |
| Tbg972.10.10000 | <i>T. brucei</i> | 566 | 414  | 979  |
| Tbg972.10.10030 | <i>T. brucei</i> | 72  | 76   | 147  |
| Tbg972.10.10030 | <i>T. brucei</i> | 229 | 243  | 471  |
| Tbg972.10.10030 | <i>T. brucei</i> | 229 | 243  | 471  |
| Tbg972.10.10050 | <i>T. brucei</i> | 56  | 442  | 497  |
| Tbg972.10.10060 | <i>T. brucei</i> | 108 | 1    | 108  |
| Tbg972.10.10060 | <i>T. brucei</i> | 220 | 155  | 374  |
| Tbg972.10.1010  | <i>T. brucei</i> | 51  | 145  | 195  |
| Tbg972.10.10160 | <i>T. brucei</i> | 76  | 20   | 95   |
| Tbg972.10.1020  | <i>T. brucei</i> | 59  | 1    | 59   |
| Tbg972.10.1020  | <i>T. brucei</i> | 215 | 70   | 284  |
| Tbg972.10.1020  | <i>T. brucei</i> | 105 | 450  | 554  |
| Tbg972.10.10220 | <i>T. brucei</i> | 59  | 2080 | 2138 |
| Tbg972.10.10250 | <i>T. brucei</i> | 141 | 1    | 141  |
| Tbg972.10.10260 | <i>T. brucei</i> | 65  | 1931 | 1995 |
| Tbg972.10.10260 | <i>T. brucei</i> | 77  | 2329 | 2405 |
| Tbg972.10.10260 | <i>T. brucei</i> | 77  | 2329 | 2405 |
| Tbg972.10.10330 | <i>T. brucei</i> | 136 | 31   | 166  |
| Tbg972.10.10350 | <i>T. brucei</i> | 51  | 176  | 226  |
| Tbg972.10.10370 | <i>T. brucei</i> | 81  | 285  | 365  |
| Tbg972.10.10370 | <i>T. brucei</i> | 66  | 370  | 435  |
| Tbg972.10.10370 | <i>T. brucei</i> | 153 | 469  | 621  |
| Tbg972.10.10390 | <i>T. brucei</i> | 68  | 1    | 68   |
| Tbg972.10.1040  | <i>T. brucei</i> | 100 | 109  | 208  |
| Tbg972.10.10400 | <i>T. brucei</i> | 49  | 94   | 142  |
| Tbg972.10.10400 | <i>T. brucei</i> | 127 | 271  | 397  |
| Tbg972.10.10400 | <i>T. brucei</i> | 93  | 410  | 502  |
| Tbg972.10.10400 | <i>T. brucei</i> | 192 | 510  | 701  |
| Tbg972.10.10400 | <i>T. brucei</i> | 270 | 703  | 972  |
| Tbg972.10.10410 | <i>T. brucei</i> | 44  | 1    | 44   |
| Tbg972.10.10410 | <i>T. brucei</i> | 49  | 73   | 121  |
| Tbg972.10.10440 | <i>T. brucei</i> | 56  | 63   | 118  |
| Tbg972.10.10440 | <i>T. brucei</i> | 55  | 165  | 219  |
| Tbg972.10.10440 | <i>T. brucei</i> | 44  | 842  | 885  |
| Tbg972.10.10480 | <i>T. brucei</i> | 209 | 1    | 209  |
| Tbg972.10.10490 | <i>T. brucei</i> | 61  | 99   | 159  |
| Tbg972.10.1050  | <i>T. brucei</i> | 42  | 11   | 52   |
| Tbg972.10.1050  | <i>T. brucei</i> | 160 | 115  | 274  |
| Tbg972.10.1050  | <i>T. brucei</i> | 46  | 282  | 327  |

|                 |                  |     |      |      |
|-----------------|------------------|-----|------|------|
| Tbg972.10.1050  | <i>T. brucei</i> | 66  | 337  | 402  |
| Tbg972.10.10510 | <i>T. brucei</i> | 95  | 29   | 123  |
| Tbg972.10.10520 | <i>T. brucei</i> | 250 | 197  | 446  |
| Tbg972.10.10540 | <i>T. brucei</i> | 45  | 418  | 462  |
| Tbg972.10.10550 | <i>T. brucei</i> | 47  | 1    | 47   |
| Tbg972.10.10550 | <i>T. brucei</i> | 60  | 82   | 141  |
| Tbg972.10.10550 | <i>T. brucei</i> | 60  | 82   | 141  |
| Tbg972.10.10580 | <i>T. brucei</i> | 63  | 1    | 63   |
| Tbg972.10.1060  | <i>T. brucei</i> | 87  | 523  | 609  |
| Tbg972.10.10650 | <i>T. brucei</i> | 41  | 62   | 102  |
| Tbg972.10.10660 | <i>T. brucei</i> | 95  | 1    | 95   |
| Tbg972.10.10670 | <i>T. brucei</i> | 134 | 501  | 634  |
| Tbg972.10.10670 | <i>T. brucei</i> | 75  | 837  | 911  |
| Tbg972.10.10670 | <i>T. brucei</i> | 47  | 963  | 1009 |
| Tbg972.10.10670 | <i>T. brucei</i> | 41  | 1053 | 1093 |
| Tbg972.10.10670 | <i>T. brucei</i> | 63  | 1235 | 1297 |
| Tbg972.10.10670 | <i>T. brucei</i> | 117 | 1354 | 1470 |
| Tbg972.10.10670 | <i>T. brucei</i> | 87  | 1556 | 1642 |
| Tbg972.10.1070  | <i>T. brucei</i> | 487 | 297  | 783  |
| Tbg972.10.1070  | <i>T. brucei</i> | 50  | 922  | 971  |
| Tbg972.10.1070  | <i>T. brucei</i> | 86  | 1249 | 1334 |
| Tbg972.10.1070  | <i>T. brucei</i> | 76  | 1489 | 1564 |
| Tbg972.10.10700 | <i>T. brucei</i> | 480 | 1    | 480  |
| Tbg972.10.10720 | <i>T. brucei</i> | 150 | 1    | 150  |
| Tbg972.10.10720 | <i>T. brucei</i> | 89  | 172  | 260  |
| Tbg972.10.10720 | <i>T. brucei</i> | 220 | 321  | 540  |
| Tbg972.10.10720 | <i>T. brucei</i> | 94  | 577  | 670  |
| Tbg972.10.10720 | <i>T. brucei</i> | 49  | 679  | 727  |
| Tbg972.10.10720 | <i>T. brucei</i> | 88  | 732  | 819  |
| Tbg972.10.10720 | <i>T. brucei</i> | 48  | 827  | 874  |
| Tbg972.10.10730 | <i>T. brucei</i> | 57  | 192  | 248  |
| Tbg972.10.10730 | <i>T. brucei</i> | 370 | 397  | 766  |
| Tbg972.10.10750 | <i>T. brucei</i> | 168 | 321  | 488  |
| Tbg972.10.10770 | <i>T. brucei</i> | 59  | 21   | 79   |
| Tbg972.10.10780 | <i>T. brucei</i> | 107 | 19   | 125  |
| Tbg972.10.10780 | <i>T. brucei</i> | 103 | 138  | 240  |
| Tbg972.10.10790 | <i>T. brucei</i> | 71  | 35   | 105  |
| Tbg972.10.10790 | <i>T. brucei</i> | 63  | 432  | 494  |
| Tbg972.10.10790 | <i>T. brucei</i> | 63  | 432  | 494  |
| Tbg972.10.1080  | <i>T. brucei</i> | 63  | 67   | 129  |
| Tbg972.10.1080  | <i>T. brucei</i> | 47  | 151  | 197  |
| Tbg972.10.1080  | <i>T. brucei</i> | 62  | 586  | 647  |
| Tbg972.10.10810 | <i>T. brucei</i> | 117 | 1    | 117  |
| Tbg972.10.10810 | <i>T. brucei</i> | 159 | 130  | 288  |
| Tbg972.10.10810 | <i>T. brucei</i> | 159 | 130  | 288  |
| Tbg972.10.10820 | <i>T. brucei</i> | 44  | 1    | 44   |
| Tbg972.10.10820 | <i>T. brucei</i> | 81  | 81   | 161  |

|                 |                  |     |     |     |
|-----------------|------------------|-----|-----|-----|
| Tbg972.10.10830 | <i>T. brucei</i> | 61  | 32  | 92  |
| Tbg972.10.10830 | <i>T. brucei</i> | 87  | 123 | 209 |
| Tbg972.10.10840 | <i>T. brucei</i> | 64  | 22  | 85  |
| Tbg972.10.10880 | <i>T. brucei</i> | 53  | 56  | 108 |
| Tbg972.10.1090  | <i>T. brucei</i> | 42  | 53  | 94  |
| Tbg972.10.1090  | <i>T. brucei</i> | 118 | 241 | 358 |
| Tbg972.10.10930 | <i>T. brucei</i> | 50  | 486 | 535 |
| Tbg972.10.10940 | <i>T. brucei</i> | 51  | 1   | 51  |
| Tbg972.10.10940 | <i>T. brucei</i> | 47  | 54  | 100 |
| Tbg972.10.10940 | <i>T. brucei</i> | 295 | 117 | 411 |
| Tbg972.10.10950 | <i>T. brucei</i> | 104 | 83  | 186 |
| Tbg972.10.10960 | <i>T. brucei</i> | 141 | 95  | 235 |
| Tbg972.10.10970 | <i>T. brucei</i> | 107 | 21  | 127 |
| Tbg972.10.10990 | <i>T. brucei</i> | 169 | 1   | 169 |
| Tbg972.10.11000 | <i>T. brucei</i> | 169 | 1   | 169 |
| Tbg972.10.11010 | <i>T. brucei</i> | 50  | 1   | 50  |
| Tbg972.10.11010 | <i>T. brucei</i> | 105 | 192 | 296 |
| Tbg972.10.11010 | <i>T. brucei</i> | 79  | 340 | 418 |
| Tbg972.10.11020 | <i>T. brucei</i> | 47  | 35  | 81  |
| Tbg972.10.11040 | <i>T. brucei</i> | 40  | 281 | 320 |
| Tbg972.10.11040 | <i>T. brucei</i> | 49  | 428 | 476 |
| Tbg972.10.11070 | <i>T. brucei</i> | 62  | 92  | 153 |
| Tbg972.10.11090 | <i>T. brucei</i> | 366 | 85  | 450 |
| Tbg972.10.1110  | <i>T. brucei</i> | 62  | 1   | 62  |
| Tbg972.10.11110 | <i>T. brucei</i> | 58  | 267 | 324 |
| Tbg972.10.11130 | <i>T. brucei</i> | 140 | 608 | 747 |
| Tbg972.10.11140 | <i>T. brucei</i> | 113 | 206 | 318 |
| Tbg972.10.11190 | <i>T. brucei</i> | 44  | 117 | 160 |
| Tbg972.10.11190 | <i>T. brucei</i> | 99  | 202 | 300 |
| Tbg972.10.11200 | <i>T. brucei</i> | 278 | 362 | 639 |
| Tbg972.10.11220 | <i>T. brucei</i> | 41  | 1   | 41  |
| Tbg972.10.11220 | <i>T. brucei</i> | 129 | 201 | 329 |
| Tbg972.10.11240 | <i>T. brucei</i> | 75  | 13  | 87  |
| Tbg972.10.11260 | <i>T. brucei</i> | 76  | 18  | 93  |
| Tbg972.10.11270 | <i>T. brucei</i> | 41  | 1   | 41  |
| Tbg972.10.11270 | <i>T. brucei</i> | 57  | 46  | 102 |
| Tbg972.10.11270 | <i>T. brucei</i> | 111 | 111 | 221 |
| Tbg972.10.11290 | <i>T. brucei</i> | 86  | 18  | 103 |
| Tbg972.10.1130  | <i>T. brucei</i> | 47  | 79  | 125 |
| Tbg972.10.11300 | <i>T. brucei</i> | 74  | 583 | 656 |
| Tbg972.10.11310 | <i>T. brucei</i> | 105 | 74  | 178 |
| Tbg972.10.11320 | <i>T. brucei</i> | 124 | 1   | 124 |
| Tbg972.10.11330 | <i>T. brucei</i> | 48  | 107 | 154 |
| Tbg972.10.11330 | <i>T. brucei</i> | 81  | 233 | 313 |
| Tbg972.10.11330 | <i>T. brucei</i> | 81  | 233 | 313 |
| Tbg972.10.1140  | <i>T. brucei</i> | 82  | 1   | 82  |
| Tbg972.10.1140  | <i>T. brucei</i> | 118 | 85  | 202 |

|                 |                  |     |     |     |
|-----------------|------------------|-----|-----|-----|
| Tbg972.10.1140  | <i>T. brucei</i> | 118 | 85  | 202 |
| Tbg972.10.11400 | <i>T. brucei</i> | 43  | 1   | 43  |
| Tbg972.10.11410 | <i>T. brucei</i> | 71  | 23  | 93  |
| Tbg972.10.11410 | <i>T. brucei</i> | 60  | 170 | 229 |
| Tbg972.10.11410 | <i>T. brucei</i> | 60  | 170 | 229 |
| Tbg972.10.11420 | <i>T. brucei</i> | 136 | 1   | 136 |
| Tbg972.10.11420 | <i>T. brucei</i> | 48  | 350 | 397 |
| Tbg972.10.11420 | <i>T. brucei</i> | 116 | 488 | 603 |
| Tbg972.10.11440 | <i>T. brucei</i> | 84  | 70  | 153 |
| Tbg972.10.11440 | <i>T. brucei</i> | 46  | 164 | 209 |
| Tbg972.10.11440 | <i>T. brucei</i> | 98  | 296 | 393 |
| Tbg972.10.11440 | <i>T. brucei</i> | 55  | 561 | 615 |
| Tbg972.10.11450 | <i>T. brucei</i> | 44  | 460 | 503 |
| Tbg972.10.11470 | <i>T. brucei</i> | 106 | 53  | 158 |
| Tbg972.10.11470 | <i>T. brucei</i> | 85  | 165 | 249 |
| Tbg972.10.11470 | <i>T. brucei</i> | 56  | 402 | 457 |
| Tbg972.10.11490 | <i>T. brucei</i> | 65  | 207 | 271 |
| Tbg972.10.1150  | <i>T. brucei</i> | 78  | 1   | 78  |
| Tbg972.10.11510 | <i>T. brucei</i> | 46  | 49  | 94  |
| Tbg972.10.11510 | <i>T. brucei</i> | 41  | 155 | 195 |
| Tbg972.10.11510 | <i>T. brucei</i> | 41  | 155 | 195 |
| Tbg972.10.11540 | <i>T. brucei</i> | 42  | 450 | 491 |
| Tbg972.10.11560 | <i>T. brucei</i> | 40  | 64  | 103 |
| Tbg972.10.11570 | <i>T. brucei</i> | 43  | 101 | 143 |
| Tbg972.10.11570 | <i>T. brucei</i> | 53  | 165 | 217 |
| Tbg972.10.11570 | <i>T. brucei</i> | 53  | 165 | 217 |
| Tbg972.10.11630 | <i>T. brucei</i> | 85  | 45  | 129 |
| Tbg972.10.11650 | <i>T. brucei</i> | 97  | 35  | 131 |
| Tbg972.10.11680 | <i>T. brucei</i> | 174 | 7   | 180 |
| Tbg972.10.1170  | <i>T. brucei</i> | 67  | 1   | 67  |
| Tbg972.10.1170  | <i>T. brucei</i> | 92  | 300 | 391 |
| Tbg972.10.1170  | <i>T. brucei</i> | 111 | 570 | 680 |
| Tbg972.10.11720 | <i>T. brucei</i> | 154 | 37  | 190 |
| Tbg972.10.11740 | <i>T. brucei</i> | 75  | 317 | 391 |
| Tbg972.10.11740 | <i>T. brucei</i> | 55  | 393 | 447 |
| Tbg972.10.11740 | <i>T. brucei</i> | 63  | 456 | 518 |
| Tbg972.10.1180  | <i>T. brucei</i> | 111 | 89  | 199 |
| Tbg972.10.1180  | <i>T. brucei</i> | 46  | 300 | 345 |
| Tbg972.10.1180  | <i>T. brucei</i> | 46  | 300 | 345 |
| Tbg972.10.11800 | <i>T. brucei</i> | 43  | 1   | 43  |
| Tbg972.10.11800 | <i>T. brucei</i> | 68  | 194 | 261 |
| Tbg972.10.11800 | <i>T. brucei</i> | 68  | 194 | 261 |
| Tbg972.10.11830 | <i>T. brucei</i> | 48  | 705 | 752 |
| Tbg972.10.11830 | <i>T. brucei</i> | 42  | 936 | 977 |
| Tbg972.10.11830 | <i>T. brucei</i> | 42  | 936 | 977 |
| Tbg972.10.11850 | <i>T. brucei</i> | 78  | 163 | 240 |
| Tbg972.10.11860 | <i>T. brucei</i> | 135 | 1   | 135 |

|                 |                  |     |      |      |
|-----------------|------------------|-----|------|------|
| Tbg972.10.11860 | <i>T. brucei</i> | 47  | 1135 | 1181 |
| Tbg972.10.11880 | <i>T. brucei</i> | 422 | 28   | 449  |
| Tbg972.10.11890 | <i>T. brucei</i> | 46  | 112  | 157  |
| Tbg972.10.11890 | <i>T. brucei</i> | 90  | 244  | 333  |
| Tbg972.10.11890 | <i>T. brucei</i> | 90  | 244  | 333  |
| Tbg972.10.1190  | <i>T. brucei</i> | 217 | 1    | 217  |
| Tbg972.10.1190  | <i>T. brucei</i> | 100 | 375  | 474  |
| Tbg972.10.1190  | <i>T. brucei</i> | 81  | 594  | 674  |
| Tbg972.10.11900 | <i>T. brucei</i> | 103 | 1    | 103  |
| Tbg972.10.11910 | <i>T. brucei</i> | 43  | 26   | 68   |
| Tbg972.10.11920 | <i>T. brucei</i> | 84  | 512  | 595  |
| Tbg972.10.11920 | <i>T. brucei</i> | 56  | 856  | 911  |
| Tbg972.10.11920 | <i>T. brucei</i> | 51  | 1087 | 1137 |
| Tbg972.10.11920 | <i>T. brucei</i> | 61  | 1140 | 1200 |
| Tbg972.10.11930 | <i>T. brucei</i> | 51  | 264  | 314  |
| Tbg972.10.11940 | <i>T. brucei</i> | 53  | 58   | 110  |
| Tbg972.10.11940 | <i>T. brucei</i> | 46  | 315  | 360  |
| Tbg972.10.11940 | <i>T. brucei</i> | 46  | 315  | 360  |
| Tbg972.10.11950 | <i>T. brucei</i> | 157 | 1    | 157  |
| Tbg972.10.11950 | <i>T. brucei</i> | 48  | 185  | 232  |
| Tbg972.10.11950 | <i>T. brucei</i> | 80  | 260  | 339  |
| Tbg972.10.11950 | <i>T. brucei</i> | 81  | 457  | 537  |
| Tbg972.10.11950 | <i>T. brucei</i> | 115 | 765  | 879  |
| Tbg972.10.11960 | <i>T. brucei</i> | 138 | 44   | 181  |
| Tbg972.10.11980 | <i>T. brucei</i> | 64  | 1    | 64   |
| Tbg972.10.11990 | <i>T. brucei</i> | 47  | 155  | 201  |
| Tbg972.10.1200  | <i>T. brucei</i> | 68  | 111  | 178  |
| Tbg972.10.1200  | <i>T. brucei</i> | 46  | 436  | 481  |
| Tbg972.10.12010 | <i>T. brucei</i> | 60  | 55   | 114  |
| Tbg972.10.12010 | <i>T. brucei</i> | 114 | 149  | 262  |
| Tbg972.10.12010 | <i>T. brucei</i> | 114 | 149  | 262  |
| Tbg972.10.12020 | <i>T. brucei</i> | 49  | 410  | 458  |
| Tbg972.10.12030 | <i>T. brucei</i> | 69  | 27   | 95   |
| Tbg972.10.12040 | <i>T. brucei</i> | 49  | 185  | 233  |
| Tbg972.10.12050 | <i>T. brucei</i> | 56  | 138  | 193  |
| Tbg972.10.12090 | <i>T. brucei</i> | 52  | 73   | 124  |
| Tbg972.10.12100 | <i>T. brucei</i> | 104 | 67   | 170  |
| Tbg972.10.12120 | <i>T. brucei</i> | 67  | 28   | 94   |
| Tbg972.10.12130 | <i>T. brucei</i> | 67  | 19   | 85   |
| Tbg972.10.12150 | <i>T. brucei</i> | 69  | 67   | 135  |
| Tbg972.10.12150 | <i>T. brucei</i> | 45  | 187  | 231  |
| Tbg972.10.12150 | <i>T. brucei</i> | 52  | 285  | 336  |
| Tbg972.10.12170 | <i>T. brucei</i> | 82  | 1    | 82   |
| Tbg972.10.12170 | <i>T. brucei</i> | 47  | 978  | 1024 |
| Tbg972.10.12170 | <i>T. brucei</i> | 47  | 978  | 1024 |
| Tbg972.10.12180 | <i>T. brucei</i> | 127 | 149  | 275  |
| Tbg972.10.12180 | <i>T. brucei</i> | 53  | 291  | 343  |

|                 |                  |      |      |      |
|-----------------|------------------|------|------|------|
| Tbg972.10.12200 | <i>T. brucei</i> | 81   | 1    | 81   |
| Tbg972.10.12220 | <i>T. brucei</i> | 66   | 168  | 233  |
| Tbg972.10.12220 | <i>T. brucei</i> | 68   | 471  | 538  |
| Tbg972.10.12220 | <i>T. brucei</i> | 68   | 471  | 538  |
| Tbg972.10.12230 | <i>T. brucei</i> | 106  | 1    | 106  |
| Tbg972.10.12240 | <i>T. brucei</i> | 100  | 1    | 100  |
| Tbg972.10.12270 | <i>T. brucei</i> | 517  | 457  | 973  |
| Tbg972.10.12270 | <i>T. brucei</i> | 97   | 975  | 1071 |
| Tbg972.10.12270 | <i>T. brucei</i> | 51   | 1091 | 1141 |
| Tbg972.10.12270 | <i>T. brucei</i> | 60   | 1162 | 1221 |
| Tbg972.10.12280 | <i>T. brucei</i> | 47   | 69   | 115  |
| Tbg972.10.12290 | <i>T. brucei</i> | 41   | 88   | 128  |
| Tbg972.10.1230  | <i>T. brucei</i> | 105  | 267  | 371  |
| Tbg972.10.1230  | <i>T. brucei</i> | 221  | 500  | 720  |
| Tbg972.10.1230  | <i>T. brucei</i> | 69   | 746  | 814  |
| Tbg972.10.1230  | <i>T. brucei</i> | 92   | 831  | 922  |
| Tbg972.10.1230  | <i>T. brucei</i> | 45   | 956  | 1000 |
| Tbg972.10.12300 | <i>T. brucei</i> | 53   | 128  | 180  |
| Tbg972.10.12300 | <i>T. brucei</i> | 130  | 426  | 555  |
| Tbg972.10.12310 | <i>T. brucei</i> | 49   | 1    | 49   |
| Tbg972.10.12310 | <i>T. brucei</i> | 45   | 102  | 146  |
| Tbg972.10.12320 | <i>T. brucei</i> | 113  | 356  | 468  |
| Tbg972.10.12320 | <i>T. brucei</i> | 98   | 752  | 849  |
| Tbg972.10.12320 | <i>T. brucei</i> | 58   | 870  | 927  |
| Tbg972.10.12320 | <i>T. brucei</i> | 75   | 1012 | 1086 |
| Tbg972.10.12330 | <i>T. brucei</i> | 57   | 384  | 440  |
| Tbg972.10.12330 | <i>T. brucei</i> | 86   | 450  | 535  |
| Tbg972.10.12330 | <i>T. brucei</i> | 64   | 574  | 637  |
| Tbg972.10.12330 | <i>T. brucei</i> | 94   | 639  | 732  |
| Tbg972.10.12330 | <i>T. brucei</i> | 62   | 761  | 822  |
| Tbg972.10.12380 | <i>T. brucei</i> | 43   | 289  | 331  |
| Tbg972.10.12390 | <i>T. brucei</i> | 64   | 1    | 64   |
| Tbg972.10.12390 | <i>T. brucei</i> | 253  | 69   | 321  |
| Tbg972.10.12390 | <i>T. brucei</i> | 230  | 432  | 661  |
| Tbg972.10.12410 | <i>T. brucei</i> | 52   | 10   | 61   |
| Tbg972.10.12420 | <i>T. brucei</i> | 61   | 53   | 113  |
| Tbg972.10.12450 | <i>T. brucei</i> | 50   | 420  | 469  |
| Tbg972.10.12470 | <i>T. brucei</i> | 51   | 166  | 216  |
| Tbg972.10.12480 | <i>T. brucei</i> | 71   | 189  | 259  |
| Tbg972.10.12490 | <i>T. brucei</i> | 110  | 18   | 127  |
| Tbg972.10.1250  | <i>T. brucei</i> | 72   | 1    | 72   |
| Tbg972.10.1250  | <i>T. brucei</i> | 81   | 194  | 274  |
| Tbg972.10.1250  | <i>T. brucei</i> | 81   | 194  | 274  |
| Tbg972.10.12500 | <i>T. brucei</i> | 93   | 23   | 115  |
| Tbg972.10.12510 | <i>T. brucei</i> | 50   | 1    | 50   |
| Tbg972.10.12530 | <i>T. brucei</i> | 1530 | 35   | 1564 |
| Tbg972.10.12530 | <i>T. brucei</i> | 56   | 1606 | 1661 |



|                 |                  |      |      |      |
|-----------------|------------------|------|------|------|
| Tbg972.10.12560 | <i>T. brucei</i> | 68   | 414  | 481  |
| Tbg972.10.12580 | <i>T. brucei</i> | 55   | 178  | 232  |
| Tbg972.10.12590 | <i>T. brucei</i> | 333  | 175  | 507  |
| Tbg972.10.12590 | <i>T. brucei</i> | 304  | 696  | 999  |
| Tbg972.10.12590 | <i>T. brucei</i> | 304  | 696  | 999  |
| Tbg972.10.1260  | <i>T. brucei</i> | 139  | 1    | 139  |
| Tbg972.10.1260  | <i>T. brucei</i> | 289  | 163  | 451  |
| Tbg972.10.1260  | <i>T. brucei</i> | 76   | 463  | 538  |
| Tbg972.10.1260  | <i>T. brucei</i> | 49   | 565  | 613  |
| Tbg972.10.12610 | <i>T. brucei</i> | 62   | 263  | 324  |
| Tbg972.10.12620 | <i>T. brucei</i> | 165  | 1    | 165  |
| Tbg972.10.12620 | <i>T. brucei</i> | 112  | 182  | 293  |
| Tbg972.10.12620 | <i>T. brucei</i> | 56   | 335  | 390  |
| Tbg972.10.12630 | <i>T. brucei</i> | 2211 | 35   | 2245 |
| Tbg972.10.12660 | <i>T. brucei</i> | 84   | 437  | 520  |
| Tbg972.10.12690 | <i>T. brucei</i> | 95   | 52   | 146  |
| Tbg972.10.12690 | <i>T. brucei</i> | 51   | 225  | 275  |
| Tbg972.10.12740 | <i>T. brucei</i> | 48   | 1    | 48   |
| Tbg972.10.12750 | <i>T. brucei</i> | 48   | 1    | 48   |
| Tbg972.10.12770 | <i>T. brucei</i> | 48   | 1    | 48   |
| Tbg972.10.12780 | <i>T. brucei</i> | 48   | 1    | 48   |
| Tbg972.10.12790 | <i>T. brucei</i> | 48   | 1    | 48   |
| Tbg972.10.1280  | <i>T. brucei</i> | 48   | 78   | 125  |
| Tbg972.10.12800 | <i>T. brucei</i> | 48   | 1    | 48   |
| Tbg972.10.12810 | <i>T. brucei</i> | 48   | 1    | 48   |
| Tbg972.10.12820 | <i>T. brucei</i> | 48   | 1    | 48   |
| Tbg972.10.12830 | <i>T. brucei</i> | 48   | 1    | 48   |
| Tbg972.10.12840 | <i>T. brucei</i> | 48   | 1    | 48   |
| Tbg972.10.12850 | <i>T. brucei</i> | 42   | 1    | 42   |
| Tbg972.10.12860 | <i>T. brucei</i> | 87   | 39   | 125  |
| Tbg972.10.12880 | <i>T. brucei</i> | 43   | 1    | 43   |
| Tbg972.10.12880 | <i>T. brucei</i> | 112  | 185  | 296  |
| Tbg972.10.12890 | <i>T. brucei</i> | 61   | 14   | 74   |
| Tbg972.10.12890 | <i>T. brucei</i> | 96   | 165  | 260  |
| Tbg972.10.1290  | <i>T. brucei</i> | 42   | 347  | 388  |
| Tbg972.10.1290  | <i>T. brucei</i> | 62   | 649  | 710  |
| Tbg972.10.1290  | <i>T. brucei</i> | 42   | 752  | 793  |
| Tbg972.10.1290  | <i>T. brucei</i> | 55   | 819  | 873  |
| Tbg972.10.1290  | <i>T. brucei</i> | 61   | 920  | 980  |
| Tbg972.10.1290  | <i>T. brucei</i> | 55   | 1024 | 1078 |
| Tbg972.10.1290  | <i>T. brucei</i> | 114  | 1126 | 1239 |
| Tbg972.10.1290  | <i>T. brucei</i> | 114  | 1481 | 1594 |
| Tbg972.10.1290  | <i>T. brucei</i> | 70   | 1620 | 1689 |
| Tbg972.10.12910 | <i>T. brucei</i> | 55   | 250  | 304  |
| Tbg972.10.12920 | <i>T. brucei</i> | 80   | 1    | 80   |
| Tbg972.10.12940 | <i>T. brucei</i> | 43   | 725  | 767  |
| Tbg972.10.12940 | <i>T. brucei</i> | 49   | 911  | 959  |

|                 |                  |     |      |      |
|-----------------|------------------|-----|------|------|
| Tbg972.10.12940 | <i>T. brucei</i> | 49  | 911  | 959  |
| Tbg972.10.12960 | <i>T. brucei</i> | 80  | 233  | 312  |
| Tbg972.10.12970 | <i>T. brucei</i> | 49  | 37   | 85   |
| Tbg972.10.12980 | <i>T. brucei</i> | 65  | 17   | 81   |
| Tbg972.10.12980 | <i>T. brucei</i> | 81  | 295  | 375  |
| Tbg972.10.12980 | <i>T. brucei</i> | 81  | 295  | 375  |
| Tbg972.10.13000 | <i>T. brucei</i> | 76  | 612  | 687  |
| Tbg972.10.13000 | <i>T. brucei</i> | 51  | 1406 | 1456 |
| Tbg972.10.13000 | <i>T. brucei</i> | 51  | 1406 | 1456 |
| Tbg972.10.13010 | <i>T. brucei</i> | 64  | 76   | 139  |
| Tbg972.10.13010 | <i>T. brucei</i> | 47  | 341  | 387  |
| Tbg972.10.13020 | <i>T. brucei</i> | 76  | 1    | 76   |
| Tbg972.10.13020 | <i>T. brucei</i> | 45  | 612  | 656  |
| Tbg972.10.13020 | <i>T. brucei</i> | 40  | 775  | 814  |
| Tbg972.10.13020 | <i>T. brucei</i> | 62  | 921  | 982  |
| Tbg972.10.13020 | <i>T. brucei</i> | 43  | 1058 | 1100 |
| Tbg972.10.13020 | <i>T. brucei</i> | 57  | 1222 | 1278 |
| Tbg972.10.13020 | <i>T. brucei</i> | 107 | 1464 | 1570 |
| Tbg972.10.13040 | <i>T. brucei</i> | 49  | 220  | 268  |
| Tbg972.10.13040 | <i>T. brucei</i> | 41  | 578  | 618  |
| Tbg972.10.13040 | <i>T. brucei</i> | 41  | 578  | 618  |
| Tbg972.10.13050 | <i>T. brucei</i> | 214 | 1    | 214  |
| Tbg972.10.13080 | <i>T. brucei</i> | 51  | 323  | 373  |
| Tbg972.10.13090 | <i>T. brucei</i> | 57  | 48   | 104  |
| Tbg972.10.13090 | <i>T. brucei</i> | 49  | 285  | 333  |
| Tbg972.10.13090 | <i>T. brucei</i> | 49  | 285  | 333  |
| Tbg972.10.13100 | <i>T. brucei</i> | 183 | 9    | 191  |
| Tbg972.10.13100 | <i>T. brucei</i> | 66  | 275  | 340  |
| Tbg972.10.13120 | <i>T. brucei</i> | 96  | 109  | 204  |
| Tbg972.10.13120 | <i>T. brucei</i> | 43  | 216  | 258  |
| Tbg972.10.13120 | <i>T. brucei</i> | 88  | 450  | 537  |
| Tbg972.10.13130 | <i>T. brucei</i> | 95  | 1    | 95   |
| Tbg972.10.13130 | <i>T. brucei</i> | 40  | 707  | 746  |
| Tbg972.10.13170 | <i>T. brucei</i> | 97  | 34   | 130  |
| Tbg972.10.13230 | <i>T. brucei</i> | 78  | 434  | 511  |
| Tbg972.10.13240 | <i>T. brucei</i> | 63  | 1    | 63   |
| Tbg972.10.13240 | <i>T. brucei</i> | 77  | 126  | 202  |
| Tbg972.10.13240 | <i>T. brucei</i> | 91  | 594  | 684  |
| Tbg972.10.13260 | <i>T. brucei</i> | 103 | 178  | 280  |
| Tbg972.10.13260 | <i>T. brucei</i> | 63  | 400  | 462  |
| Tbg972.10.13260 | <i>T. brucei</i> | 53  | 505  | 557  |
| Tbg972.10.13270 | <i>T. brucei</i> | 103 | 178  | 280  |
| Tbg972.10.13270 | <i>T. brucei</i> | 63  | 400  | 462  |
| Tbg972.10.13270 | <i>T. brucei</i> | 53  | 505  | 557  |
| Tbg972.10.13280 | <i>T. brucei</i> | 103 | 178  | 280  |
| Tbg972.10.13280 | <i>T. brucei</i> | 63  | 400  | 462  |
| Tbg972.10.13280 | <i>T. brucei</i> | 53  | 505  | 557  |

|                 |                  |     |      |      |
|-----------------|------------------|-----|------|------|
| Tbg972.10.13290 | <i>T. brucei</i> | 146 | 1    | 146  |
| Tbg972.10.13290 | <i>T. brucei</i> | 53  | 150  | 202  |
| Tbg972.10.13300 | <i>T. brucei</i> | 48  | 1    | 48   |
| Tbg972.10.13320 | <i>T. brucei</i> | 141 | 1    | 141  |
| Tbg972.10.13330 | <i>T. brucei</i> | 88  | 194  | 281  |
| Tbg972.10.13330 | <i>T. brucei</i> | 55  | 897  | 951  |
| Tbg972.10.13330 | <i>T. brucei</i> | 55  | 897  | 951  |
| Tbg972.10.13360 | <i>T. brucei</i> | 46  | 27   | 72   |
| Tbg972.10.13360 | <i>T. brucei</i> | 101 | 198  | 298  |
| Tbg972.10.13360 | <i>T. brucei</i> | 101 | 198  | 298  |
| Tbg972.10.13370 | <i>T. brucei</i> | 41  | 156  | 196  |
| Tbg972.10.13380 | <i>T. brucei</i> | 47  | 1    | 47   |
| Tbg972.10.13380 | <i>T. brucei</i> | 109 | 67   | 175  |
| Tbg972.10.13380 | <i>T. brucei</i> | 109 | 67   | 175  |
| Tbg972.10.13390 | <i>T. brucei</i> | 74  | 1    | 74   |
| Tbg972.10.13390 | <i>T. brucei</i> | 106 | 145  | 250  |
| Tbg972.10.13390 | <i>T. brucei</i> | 731 | 297  | 1027 |
| Tbg972.10.13420 | <i>T. brucei</i> | 116 | 22   | 137  |
| Tbg972.10.13420 | <i>T. brucei</i> | 43  | 789  | 831  |
| Tbg972.10.13440 | <i>T. brucei</i> | 60  | 45   | 104  |
| Tbg972.10.13440 | <i>T. brucei</i> | 60  | 770  | 829  |
| Tbg972.10.13440 | <i>T. brucei</i> | 60  | 770  | 829  |
| Tbg972.10.13460 | <i>T. brucei</i> | 74  | 1    | 74   |
| Tbg972.10.13470 | <i>T. brucei</i> | 52  | 20   | 71   |
| Tbg972.10.13490 | <i>T. brucei</i> | 72  | 124  | 195  |
| Tbg972.10.13490 | <i>T. brucei</i> | 42  | 296  | 337  |
| Tbg972.10.13490 | <i>T. brucei</i> | 42  | 296  | 337  |
| Tbg972.10.13500 | <i>T. brucei</i> | 117 | 1691 | 1807 |
| Tbg972.10.13510 | <i>T. brucei</i> | 56  | 41   | 96   |
| Tbg972.10.13520 | <i>T. brucei</i> | 52  | 396  | 447  |
| Tbg972.10.13530 | <i>T. brucei</i> | 49  | 1    | 49   |
| Tbg972.10.13550 | <i>T. brucei</i> | 48  | 424  | 471  |
| Tbg972.10.13560 | <i>T. brucei</i> | 54  | 127  | 180  |
| Tbg972.10.13560 | <i>T. brucei</i> | 132 | 293  | 424  |
| Tbg972.10.13570 | <i>T. brucei</i> | 214 | 46   | 259  |
| Tbg972.10.13570 | <i>T. brucei</i> | 70  | 265  | 334  |
| Tbg972.10.13580 | <i>T. brucei</i> | 94  | 217  | 310  |
| Tbg972.10.13580 | <i>T. brucei</i> | 78  | 326  | 403  |
| Tbg972.10.13590 | <i>T. brucei</i> | 275 | 1    | 275  |
| Tbg972.10.13590 | <i>T. brucei</i> | 148 | 321  | 468  |
| Tbg972.10.13590 | <i>T. brucei</i> | 123 | 517  | 639  |
| Tbg972.10.13590 | <i>T. brucei</i> | 197 | 652  | 848  |
| Tbg972.10.13600 | <i>T. brucei</i> | 45  | 13   | 57   |
| Tbg972.10.13600 | <i>T. brucei</i> | 41  | 147  | 187  |
| Tbg972.10.13600 | <i>T. brucei</i> | 41  | 147  | 187  |
| Tbg972.10.13610 | <i>T. brucei</i> | 40  | 53   | 92   |
| Tbg972.10.13610 | <i>T. brucei</i> | 48  | 104  | 151  |

|                 |                  |     |      |      |
|-----------------|------------------|-----|------|------|
| Tbg972.10.13610 | <i>T. brucei</i> | 48  | 104  | 151  |
| Tbg972.10.13650 | <i>T. brucei</i> | 49  | 165  | 213  |
| Tbg972.10.13650 | <i>T. brucei</i> | 95  | 261  | 355  |
| Tbg972.10.13650 | <i>T. brucei</i> | 95  | 261  | 355  |
| Tbg972.10.13670 | <i>T. brucei</i> | 83  | 61   | 143  |
| Tbg972.10.13680 | <i>T. brucei</i> | 46  | 1    | 46   |
| Tbg972.10.13690 | <i>T. brucei</i> | 308 | 1    | 308  |
| Tbg972.10.13690 | <i>T. brucei</i> | 73  | 459  | 531  |
| Tbg972.10.13690 | <i>T. brucei</i> | 61  | 638  | 698  |
| Tbg972.10.13690 | <i>T. brucei</i> | 172 | 780  | 951  |
| Tbg972.10.13690 | <i>T. brucei</i> | 78  | 961  | 1038 |
| Tbg972.10.13690 | <i>T. brucei</i> | 345 | 1042 | 1386 |
| Tbg972.10.13700 | <i>T. brucei</i> | 47  | 22   | 68   |
| Tbg972.10.13720 | <i>T. brucei</i> | 195 | 1    | 195  |
| Tbg972.10.13720 | <i>T. brucei</i> | 64  | 204  | 267  |
| Tbg972.10.13720 | <i>T. brucei</i> | 52  | 603  | 654  |
| Tbg972.10.13740 | <i>T. brucei</i> | 72  | 235  | 306  |
| Tbg972.10.13750 | <i>T. brucei</i> | 62  | 92   | 153  |
| Tbg972.10.13760 | <i>T. brucei</i> | 47  | 1    | 47   |
| Tbg972.10.13760 | <i>T. brucei</i> | 41  | 350  | 390  |
| Tbg972.10.13760 | <i>T. brucei</i> | 41  | 350  | 390  |
| Tbg972.10.13770 | <i>T. brucei</i> | 42  | 1    | 42   |
| Tbg972.10.13770 | <i>T. brucei</i> | 44  | 177  | 220  |
| Tbg972.10.13770 | <i>T. brucei</i> | 74  | 251  | 324  |
| Tbg972.10.13780 | <i>T. brucei</i> | 154 | 203  | 356  |
| Tbg972.10.13790 | <i>T. brucei</i> | 119 | 1    | 119  |
| Tbg972.10.13790 | <i>T. brucei</i> | 93  | 129  | 221  |
| Tbg972.10.13790 | <i>T. brucei</i> | 57  | 250  | 306  |
| Tbg972.10.13800 | <i>T. brucei</i> | 72  | 22   | 93   |
| Tbg972.10.13800 | <i>T. brucei</i> | 206 | 155  | 360  |
| Tbg972.10.13800 | <i>T. brucei</i> | 111 | 385  | 495  |
| Tbg972.10.13800 | <i>T. brucei</i> | 247 | 653  | 899  |
| Tbg972.10.13810 | <i>T. brucei</i> | 50  | 29   | 78   |
| Tbg972.10.13820 | <i>T. brucei</i> | 384 | 1    | 384  |
| Tbg972.10.13820 | <i>T. brucei</i> | 57  | 580  | 636  |
| Tbg972.10.13820 | <i>T. brucei</i> | 51  | 679  | 729  |
| Tbg972.10.13830 | <i>T. brucei</i> | 46  | 9    | 54   |
| Tbg972.10.13850 | <i>T. brucei</i> | 112 | 128  | 239  |
| Tbg972.10.13850 | <i>T. brucei</i> | 55  | 1148 | 1202 |
| Tbg972.10.13850 | <i>T. brucei</i> | 55  | 1148 | 1202 |
| Tbg972.10.13860 | <i>T. brucei</i> | 68  | 17   | 84   |
| Tbg972.10.13860 | <i>T. brucei</i> | 66  | 95   | 160  |
| Tbg972.10.13860 | <i>T. brucei</i> | 65  | 176  | 240  |
| Tbg972.10.13860 | <i>T. brucei</i> | 46  | 479  | 524  |
| Tbg972.10.13860 | <i>T. brucei</i> | 113 | 533  | 645  |
| Tbg972.10.13880 | <i>T. brucei</i> | 103 | 48   | 150  |
| Tbg972.10.13880 | <i>T. brucei</i> | 92  | 225  | 316  |

|                 |                  |     |      |      |
|-----------------|------------------|-----|------|------|
| Tbg972.10.13920 | <i>T. brucei</i> | 133 | 1    | 133  |
| Tbg972.10.13920 | <i>T. brucei</i> | 70  | 402  | 471  |
| Tbg972.10.13920 | <i>T. brucei</i> | 59  | 619  | 677  |
| Tbg972.10.13930 | <i>T. brucei</i> | 84  | 1    | 84   |
| Tbg972.10.13930 | <i>T. brucei</i> | 52  | 87   | 138  |
| Tbg972.10.13930 | <i>T. brucei</i> | 208 | 204  | 411  |
| Tbg972.10.13940 | <i>T. brucei</i> | 83  | 44   | 126  |
| Tbg972.10.13940 | <i>T. brucei</i> | 110 | 387  | 496  |
| Tbg972.10.13940 | <i>T. brucei</i> | 41  | 550  | 590  |
| Tbg972.10.13950 | <i>T. brucei</i> | 105 | 1    | 105  |
| Tbg972.10.13950 | <i>T. brucei</i> | 148 | 108  | 255  |
| Tbg972.10.13950 | <i>T. brucei</i> | 53  | 472  | 524  |
| Tbg972.10.13950 | <i>T. brucei</i> | 59  | 1084 | 1142 |
| Tbg972.10.13950 | <i>T. brucei</i> | 46  | 1182 | 1227 |
| Tbg972.10.13950 | <i>T. brucei</i> | 54  | 1277 | 1330 |
| Tbg972.10.13950 | <i>T. brucei</i> | 68  | 1354 | 1421 |
| Tbg972.10.13950 | <i>T. brucei</i> | 154 | 1441 | 1594 |
| Tbg972.10.13950 | <i>T. brucei</i> | 56  | 1600 | 1655 |
| Tbg972.10.13970 | <i>T. brucei</i> | 48  | 333  | 380  |
| Tbg972.10.13970 | <i>T. brucei</i> | 169 | 429  | 597  |
| Tbg972.10.14000 | <i>T. brucei</i> | 216 | 29   | 244  |
| Tbg972.10.14000 | <i>T. brucei</i> | 51  | 338  | 388  |
| Tbg972.10.14000 | <i>T. brucei</i> | 73  | 450  | 522  |
| Tbg972.10.14010 | <i>T. brucei</i> | 76  | 1    | 76   |
| Tbg972.10.14050 | <i>T. brucei</i> | 118 | 1    | 118  |
| Tbg972.10.14060 | <i>T. brucei</i> | 47  | 25   | 71   |
| Tbg972.10.14060 | <i>T. brucei</i> | 129 | 117  | 245  |
| Tbg972.10.14060 | <i>T. brucei</i> | 118 | 336  | 453  |
| Tbg972.10.14080 | <i>T. brucei</i> | 87  | 1    | 87   |
| Tbg972.10.14080 | <i>T. brucei</i> | 95  | 891  | 985  |
| Tbg972.10.14080 | <i>T. brucei</i> | 95  | 891  | 985  |
| Tbg972.10.14090 | <i>T. brucei</i> | 84  | 20   | 103  |
| Tbg972.10.14100 | <i>T. brucei</i> | 47  | 45   | 91   |
| Tbg972.10.14100 | <i>T. brucei</i> | 59  | 226  | 284  |
| Tbg972.10.14100 | <i>T. brucei</i> | 44  | 358  | 401  |
| Tbg972.10.14130 | <i>T. brucei</i> | 71  | 1    | 71   |
| Tbg972.10.14130 | <i>T. brucei</i> | 58  | 94   | 151  |
| Tbg972.10.14130 | <i>T. brucei</i> | 74  | 214  | 287  |
| Tbg972.10.14130 | <i>T. brucei</i> | 51  | 366  | 416  |
| Tbg972.10.14130 | <i>T. brucei</i> | 283 | 433  | 715  |
| Tbg972.10.14130 | <i>T. brucei</i> | 48  | 733  | 780  |
| Tbg972.10.14140 | <i>T. brucei</i> | 163 | 89   | 251  |
| Tbg972.10.14140 | <i>T. brucei</i> | 89  | 314  | 402  |
| Tbg972.10.14140 | <i>T. brucei</i> | 286 | 471  | 756  |
| Tbg972.10.14170 | <i>T. brucei</i> | 117 | 1    | 117  |
| Tbg972.10.14180 | <i>T. brucei</i> | 91  | 1    | 91   |
| Tbg972.10.14180 | <i>T. brucei</i> | 62  | 133  | 194  |

|                 |                  |     |      |      |
|-----------------|------------------|-----|------|------|
| Tbg972.10.14180 | <i>T. brucei</i> | 86  | 325  | 410  |
| Tbg972.10.14180 | <i>T. brucei</i> | 75  | 668  | 742  |
| Tbg972.10.14190 | <i>T. brucei</i> | 43  | 78   | 120  |
| Tbg972.10.1420  | <i>T. brucei</i> | 56  | 55   | 110  |
| Tbg972.10.14200 | <i>T. brucei</i> | 115 | 1    | 115  |
| Tbg972.10.14220 | <i>T. brucei</i> | 208 | 1    | 208  |
| Tbg972.10.14220 | <i>T. brucei</i> | 128 | 220  | 347  |
| Tbg972.10.14220 | <i>T. brucei</i> | 95  | 370  | 464  |
| Tbg972.10.14220 | <i>T. brucei</i> | 40  | 985  | 1024 |
| Tbg972.10.14230 | <i>T. brucei</i> | 120 | 20   | 139  |
| Tbg972.10.14230 | <i>T. brucei</i> | 60  | 258  | 317  |
| Tbg972.10.14230 | <i>T. brucei</i> | 60  | 258  | 317  |
| Tbg972.10.14240 | <i>T. brucei</i> | 41  | 550  | 590  |
| Tbg972.10.14250 | <i>T. brucei</i> | 66  | 205  | 270  |
| Tbg972.10.14280 | <i>T. brucei</i> | 48  | 372  | 419  |
| Tbg972.10.14280 | <i>T. brucei</i> | 70  | 446  | 515  |
| Tbg972.10.14280 | <i>T. brucei</i> | 217 | 523  | 739  |
| Tbg972.10.14290 | <i>T. brucei</i> | 207 | 1    | 207  |
| Tbg972.10.14300 | <i>T. brucei</i> | 317 | 1    | 317  |
| Tbg972.10.14320 | <i>T. brucei</i> | 47  | 81   | 127  |
| Tbg972.10.14320 | <i>T. brucei</i> | 116 | 135  | 250  |
| Tbg972.10.14320 | <i>T. brucei</i> | 354 | 344  | 697  |
| Tbg972.10.14360 | <i>T. brucei</i> | 54  | 42   | 95   |
| Tbg972.10.14380 | <i>T. brucei</i> | 45  | 1    | 45   |
| Tbg972.10.1440  | <i>T. brucei</i> | 41  | 46   | 86   |
| Tbg972.10.1440  | <i>T. brucei</i> | 45  | 111  | 155  |
| Tbg972.10.1440  | <i>T. brucei</i> | 40  | 213  | 252  |
| Tbg972.10.14400 | <i>T. brucei</i> | 202 | 1    | 202  |
| Tbg972.10.14410 | <i>T. brucei</i> | 169 | 1    | 169  |
| Tbg972.10.14410 | <i>T. brucei</i> | 60  | 206  | 265  |
| Tbg972.10.14430 | <i>T. brucei</i> | 67  | 69   | 135  |
| Tbg972.10.14430 | <i>T. brucei</i> | 46  | 179  | 224  |
| Tbg972.10.14430 | <i>T. brucei</i> | 46  | 179  | 224  |
| Tbg972.10.14440 | <i>T. brucei</i> | 42  | 26   | 67   |
| Tbg972.10.14480 | <i>T. brucei</i> | 179 | 72   | 250  |
| Tbg972.10.14510 | <i>T. brucei</i> | 58  | 346  | 403  |
| Tbg972.10.14530 | <i>T. brucei</i> | 100 | 87   | 186  |
| Tbg972.10.14550 | <i>T. brucei</i> | 41  | 1    | 41   |
| Tbg972.10.14550 | <i>T. brucei</i> | 64  | 461  | 524  |
| Tbg972.10.14550 | <i>T. brucei</i> | 73  | 906  | 978  |
| Tbg972.10.14620 | <i>T. brucei</i> | 74  | 101  | 174  |
| Tbg972.10.14620 | <i>T. brucei</i> | 77  | 208  | 284  |
| Tbg972.10.14620 | <i>T. brucei</i> | 42  | 542  | 583  |
| Tbg972.10.14620 | <i>T. brucei</i> | 132 | 1446 | 1577 |
| Tbg972.10.14620 | <i>T. brucei</i> | 123 | 1598 | 1720 |
| Tbg972.10.14620 | <i>T. brucei</i> | 50  | 1810 | 1859 |
| Tbg972.10.14620 | <i>T. brucei</i> | 88  | 1943 | 2030 |

|                 |                  |     |      |      |
|-----------------|------------------|-----|------|------|
| Tbg972.10.14640 | <i>T. brucei</i> | 42  | 584  | 625  |
| Tbg972.10.14650 | <i>T. brucei</i> | 120 | 125  | 244  |
| Tbg972.10.14660 | <i>T. brucei</i> | 40  | 158  | 197  |
| Tbg972.10.14670 | <i>T. brucei</i> | 45  | 1    | 45   |
| Tbg972.10.14690 | <i>T. brucei</i> | 69  | 279  | 347  |
| Tbg972.10.14690 | <i>T. brucei</i> | 149 | 451  | 599  |
| Tbg972.10.1470  | <i>T. brucei</i> | 95  | 24   | 118  |
| Tbg972.10.1470  | <i>T. brucei</i> | 71  | 447  | 517  |
| Tbg972.10.1470  | <i>T. brucei</i> | 44  | 665  | 708  |
| Tbg972.10.1470  | <i>T. brucei</i> | 114 | 1052 | 1165 |
| Tbg972.10.14740 | <i>T. brucei</i> | 66  | 304  | 369  |
| Tbg972.10.14770 | <i>T. brucei</i> | 42  | 1    | 42   |
| Tbg972.10.14770 | <i>T. brucei</i> | 52  | 155  | 206  |
| Tbg972.10.14770 | <i>T. brucei</i> | 61  | 732  | 792  |
| Tbg972.10.14830 | <i>T. brucei</i> | 73  | 120  | 192  |
| Tbg972.10.14830 | <i>T. brucei</i> | 79  | 844  | 922  |
| Tbg972.10.14830 | <i>T. brucei</i> | 79  | 844  | 922  |
| Tbg972.10.14850 | <i>T. brucei</i> | 52  | 1    | 52   |
| Tbg972.10.14850 | <i>T. brucei</i> | 50  | 66   | 115  |
| Tbg972.10.14850 | <i>T. brucei</i> | 55  | 148  | 202  |
| Tbg972.10.14860 | <i>T. brucei</i> | 54  | 549  | 602  |
| Tbg972.10.14920 | <i>T. brucei</i> | 100 | 41   | 140  |
| Tbg972.10.14920 | <i>T. brucei</i> | 85  | 452  | 536  |
| Tbg972.10.14920 | <i>T. brucei</i> | 85  | 452  | 536  |
| Tbg972.10.14930 | <i>T. brucei</i> | 77  | 161  | 237  |
| Tbg972.10.14930 | <i>T. brucei</i> | 70  | 296  | 365  |
| Tbg972.10.14970 | <i>T. brucei</i> | 142 | 1    | 142  |
| Tbg972.10.14970 | <i>T. brucei</i> | 40  | 610  | 649  |
| Tbg972.10.14990 | <i>T. brucei</i> | 71  | 180  | 250  |
| Tbg972.10.14990 | <i>T. brucei</i> | 48  | 362  | 409  |
| Tbg972.10.14990 | <i>T. brucei</i> | 43  | 572  | 614  |
| Tbg972.10.14990 | <i>T. brucei</i> | 191 | 677  | 867  |
| Tbg972.10.150   | <i>T. brucei</i> | 58  | 1    | 58   |
| Tbg972.10.150   | <i>T. brucei</i> | 66  | 71   | 136  |
| Tbg972.10.150   | <i>T. brucei</i> | 193 | 174  | 366  |
| Tbg972.10.15000 | <i>T. brucei</i> | 40  | 135  | 174  |
| Tbg972.10.15040 | <i>T. brucei</i> | 41  | 198  | 238  |
| Tbg972.10.15050 | <i>T. brucei</i> | 152 | 1    | 152  |
| Tbg972.10.15050 | <i>T. brucei</i> | 68  | 487  | 554  |
| Tbg972.10.15050 | <i>T. brucei</i> | 137 | 566  | 702  |
| Tbg972.10.15050 | <i>T. brucei</i> | 42  | 728  | 769  |
| Tbg972.10.15050 | <i>T. brucei</i> | 69  | 806  | 874  |
| Tbg972.10.15050 | <i>T. brucei</i> | 234 | 899  | 1132 |
| Tbg972.10.15060 | <i>T. brucei</i> | 40  | 57   | 96   |
| Tbg972.10.15070 | <i>T. brucei</i> | 63  | 1    | 63   |
| Tbg972.10.15080 | <i>T. brucei</i> | 90  | 341  | 430  |
| Tbg972.10.15080 | <i>T. brucei</i> | 43  | 537  | 579  |

|                 |                  |     |     |      |
|-----------------|------------------|-----|-----|------|
| Tbg972.10.15080 | <i>T. brucei</i> | 43  | 537 | 579  |
| Tbg972.10.1510  | <i>T. brucei</i> | 40  | 44  | 83   |
| Tbg972.10.15140 | <i>T. brucei</i> | 76  | 29  | 104  |
| Tbg972.10.15170 | <i>T. brucei</i> | 367 | 1   | 367  |
| Tbg972.10.15170 | <i>T. brucei</i> | 48  | 410 | 457  |
| Tbg972.10.15180 | <i>T. brucei</i> | 48  | 518 | 565  |
| Tbg972.10.1520  | <i>T. brucei</i> | 154 | 562 | 715  |
| Tbg972.10.15200 | <i>T. brucei</i> | 331 | 1   | 331  |
| Tbg972.10.15200 | <i>T. brucei</i> | 43  | 420 | 462  |
| Tbg972.10.15200 | <i>T. brucei</i> | 91  | 667 | 757  |
| Tbg972.10.15200 | <i>T. brucei</i> | 125 | 899 | 1023 |
| Tbg972.10.15210 | <i>T. brucei</i> | 42  | 57  | 98   |
| Tbg972.10.15220 | <i>T. brucei</i> | 45  | 1   | 45   |
| Tbg972.10.15220 | <i>T. brucei</i> | 53  | 53  | 105  |
| Tbg972.10.15220 | <i>T. brucei</i> | 53  | 53  | 105  |
| Tbg972.10.15230 | <i>T. brucei</i> | 225 | 87  | 311  |
| Tbg972.10.15230 | <i>T. brucei</i> | 66  | 565 | 630  |
| Tbg972.10.15240 | <i>T. brucei</i> | 41  | 60  | 100  |
| Tbg972.10.15260 | <i>T. brucei</i> | 244 | 67  | 310  |
| Tbg972.10.15260 | <i>T. brucei</i> | 165 | 651 | 815  |
| Tbg972.10.15280 | <i>T. brucei</i> | 82  | 1   | 82   |
| Tbg972.10.15280 | <i>T. brucei</i> | 123 | 154 | 276  |
| Tbg972.10.15280 | <i>T. brucei</i> | 242 | 295 | 536  |
| Tbg972.10.15290 | <i>T. brucei</i> | 71  | 72  | 142  |
| Tbg972.10.15290 | <i>T. brucei</i> | 73  | 160 | 232  |
| Tbg972.10.15290 | <i>T. brucei</i> | 73  | 160 | 232  |
| Tbg972.10.1530  | <i>T. brucei</i> | 61  | 63  | 123  |
| Tbg972.10.1530  | <i>T. brucei</i> | 80  | 158 | 237  |
| Tbg972.10.1530  | <i>T. brucei</i> | 61  | 273 | 333  |
| Tbg972.10.1530  | <i>T. brucei</i> | 41  | 435 | 475  |
| Tbg972.10.1530  | <i>T. brucei</i> | 51  | 496 | 546  |
| Tbg972.10.15300 | <i>T. brucei</i> | 51  | 34  | 84   |
| Tbg972.10.15300 | <i>T. brucei</i> | 42  | 101 | 142  |
| Tbg972.10.15300 | <i>T. brucei</i> | 42  | 101 | 142  |
| Tbg972.10.15310 | <i>T. brucei</i> | 57  | 81  | 137  |
| Tbg972.10.15320 | <i>T. brucei</i> | 72  | 280 | 351  |
| Tbg972.10.15330 | <i>T. brucei</i> | 95  | 510 | 604  |
| Tbg972.10.15330 | <i>T. brucei</i> | 125 | 686 | 810  |
| Tbg972.10.15340 | <i>T. brucei</i> | 93  | 1   | 93   |
| Tbg972.10.15350 | <i>T. brucei</i> | 73  | 1   | 73   |
| Tbg972.10.15350 | <i>T. brucei</i> | 137 | 94  | 230  |
| Tbg972.10.15350 | <i>T. brucei</i> | 514 | 295 | 808  |
| Tbg972.10.15350 | <i>T. brucei</i> | 90  | 813 | 902  |
| Tbg972.10.15370 | <i>T. brucei</i> | 154 | 218 | 371  |
| Tbg972.10.15380 | <i>T. brucei</i> | 63  | 175 | 237  |
| Tbg972.10.15380 | <i>T. brucei</i> | 53  | 264 | 316  |
| Tbg972.10.15380 | <i>T. brucei</i> | 53  | 264 | 316  |



|                 |                  |     |     |      |
|-----------------|------------------|-----|-----|------|
| Tbg972.10.1540  | <i>T. brucei</i> | 41  | 31  | 71   |
| Tbg972.10.1540  | <i>T. brucei</i> | 51  | 93  | 143  |
| Tbg972.10.1540  | <i>T. brucei</i> | 46  | 391 | 436  |
| Tbg972.10.15400 | <i>T. brucei</i> | 112 | 175 | 286  |
| Tbg972.10.15410 | <i>T. brucei</i> | 50  | 55  | 104  |
| Tbg972.10.15430 | <i>T. brucei</i> | 115 | 166 | 280  |
| Tbg972.10.15460 | <i>T. brucei</i> | 149 | 1   | 149  |
| Tbg972.10.1550  | <i>T. brucei</i> | 164 | 1   | 164  |
| Tbg972.10.1550  | <i>T. brucei</i> | 171 | 189 | 359  |
| Tbg972.10.1550  | <i>T. brucei</i> | 248 | 386 | 633  |
| Tbg972.10.15500 | <i>T. brucei</i> | 193 | 114 | 306  |
| Tbg972.10.15510 | <i>T. brucei</i> | 76  | 1   | 76   |
| Tbg972.10.15510 | <i>T. brucei</i> | 51  | 125 | 175  |
| Tbg972.10.15510 | <i>T. brucei</i> | 94  | 236 | 329  |
| Tbg972.10.15510 | <i>T. brucei</i> | 271 | 424 | 694  |
| Tbg972.10.15520 | <i>T. brucei</i> | 265 | 514 | 778  |
| Tbg972.10.15520 | <i>T. brucei</i> | 67  | 837 | 903  |
| Tbg972.10.15520 | <i>T. brucei</i> | 155 | 933 | 1087 |
| Tbg972.10.15550 | <i>T. brucei</i> | 77  | 57  | 133  |
| Tbg972.10.15550 | <i>T. brucei</i> | 54  | 736 | 789  |
| Tbg972.10.15550 | <i>T. brucei</i> | 54  | 736 | 789  |
| Tbg972.10.15560 | <i>T. brucei</i> | 65  | 39  | 103  |
| Tbg972.10.15570 | <i>T. brucei</i> | 60  | 1   | 60   |
| Tbg972.10.15570 | <i>T. brucei</i> | 51  | 301 | 351  |
| Tbg972.10.15570 | <i>T. brucei</i> | 51  | 301 | 351  |
| Tbg972.10.15580 | <i>T. brucei</i> | 89  | 1   | 89   |
| Tbg972.10.15580 | <i>T. brucei</i> | 53  | 220 | 272  |
| Tbg972.10.15580 | <i>T. brucei</i> | 85  | 333 | 417  |
| Tbg972.10.15580 | <i>T. brucei</i> | 87  | 468 | 554  |
| Tbg972.10.15580 | <i>T. brucei</i> | 68  | 703 | 770  |
| Tbg972.10.15580 | <i>T. brucei</i> | 137 | 833 | 969  |
| Tbg972.10.15580 | <i>T. brucei</i> | 48  | 979 | 1026 |
| Tbg972.10.15590 | <i>T. brucei</i> | 53  | 55  | 107  |
| Tbg972.10.15620 | <i>T. brucei</i> | 71  | 1   | 71   |
| Tbg972.10.15630 | <i>T. brucei</i> | 114 | 1   | 114  |
| Tbg972.10.15630 | <i>T. brucei</i> | 417 | 142 | 558  |
| Tbg972.10.15630 | <i>T. brucei</i> | 365 | 595 | 959  |
| Tbg972.10.15650 | <i>T. brucei</i> | 109 | 66  | 174  |
| Tbg972.10.15680 | <i>T. brucei</i> | 95  | 132 | 226  |
| Tbg972.10.1570  | <i>T. brucei</i> | 53  | 100 | 152  |
| Tbg972.10.1580  | <i>T. brucei</i> | 43  | 1   | 43   |
| Tbg972.10.1580  | <i>T. brucei</i> | 57  | 127 | 183  |
| Tbg972.10.1580  | <i>T. brucei</i> | 63  | 436 | 498  |
| Tbg972.10.1580  | <i>T. brucei</i> | 102 | 551 | 652  |
| Tbg972.10.1580  | <i>T. brucei</i> | 67  | 685 | 751  |
| Tbg972.10.1580  | <i>T. brucei</i> | 69  | 786 | 854  |
| Tbg972.10.15820 | <i>T. brucei</i> | 52  | 1   | 52   |

|                 |                  |     |      |      |
|-----------------|------------------|-----|------|------|
| Tbg972.10.15820 | <i>T. brucei</i> | 87  | 327  | 413  |
| Tbg972.10.15820 | <i>T. brucei</i> | 48  | 633  | 680  |
| Tbg972.10.15850 | <i>T. brucei</i> | 55  | 1    | 55   |
| Tbg972.10.15850 | <i>T. brucei</i> | 47  | 89   | 135  |
| Tbg972.10.15850 | <i>T. brucei</i> | 242 | 197  | 438  |
| Tbg972.10.15870 | <i>T. brucei</i> | 40  | 1    | 40   |
| Tbg972.10.15890 | <i>T. brucei</i> | 181 | 1    | 181  |
| Tbg972.10.15900 | <i>T. brucei</i> | 61  | 1    | 61   |
| Tbg972.10.15900 | <i>T. brucei</i> | 234 | 593  | 826  |
| Tbg972.10.15920 | <i>T. brucei</i> | 65  | 38   | 102  |
| Tbg972.10.15930 | <i>T. brucei</i> | 156 | 1    | 156  |
| Tbg972.10.15940 | <i>T. brucei</i> | 49  | 708  | 756  |
| Tbg972.10.15940 | <i>T. brucei</i> | 123 | 1114 | 1236 |
| Tbg972.10.15960 | <i>T. brucei</i> | 50  | 35   | 84   |
| Tbg972.10.15960 | <i>T. brucei</i> | 60  | 869  | 928  |
| Tbg972.10.15960 | <i>T. brucei</i> | 60  | 869  | 928  |
| Tbg972.10.15980 | <i>T. brucei</i> | 88  | 1    | 88   |
| Tbg972.10.15980 | <i>T. brucei</i> | 80  | 652  | 731  |
| Tbg972.10.15990 | <i>T. brucei</i> | 40  | 1    | 40   |
| Tbg972.10.160   | <i>T. brucei</i> | 202 | 1    | 202  |
| Tbg972.10.160   | <i>T. brucei</i> | 108 | 205  | 312  |
| Tbg972.10.160   | <i>T. brucei</i> | 62  | 329  | 390  |
| Tbg972.10.160   | <i>T. brucei</i> | 118 | 484  | 601  |
| Tbg972.10.160   | <i>T. brucei</i> | 107 | 617  | 723  |
| Tbg972.10.16000 | <i>T. brucei</i> | 86  | 301  | 386  |
| Tbg972.10.16010 | <i>T. brucei</i> | 40  | 399  | 438  |
| Tbg972.10.16020 | <i>T. brucei</i> | 116 | 1    | 116  |
| Tbg972.10.16020 | <i>T. brucei</i> | 49  | 280  | 328  |
| Tbg972.10.16020 | <i>T. brucei</i> | 54  | 737  | 790  |
| Tbg972.10.16020 | <i>T. brucei</i> | 46  | 800  | 845  |
| Tbg972.10.16020 | <i>T. brucei</i> | 55  | 936  | 990  |
| Tbg972.10.16020 | <i>T. brucei</i> | 161 | 1121 | 1281 |
| Tbg972.10.16020 | <i>T. brucei</i> | 105 | 1328 | 1432 |
| Tbg972.10.16020 | <i>T. brucei</i> | 89  | 1624 | 1712 |
| Tbg972.10.16020 | <i>T. brucei</i> | 122 | 1744 | 1865 |
| Tbg972.10.16030 | <i>T. brucei</i> | 116 | 118  | 233  |
| Tbg972.10.16030 | <i>T. brucei</i> | 103 | 264  | 366  |
| Tbg972.10.16030 | <i>T. brucei</i> | 44  | 395  | 438  |
| Tbg972.10.16030 | <i>T. brucei</i> | 75  | 687  | 761  |
| Tbg972.10.16030 | <i>T. brucei</i> | 81  | 864  | 944  |
| Tbg972.10.16030 | <i>T. brucei</i> | 66  | 1036 | 1101 |
| Tbg972.10.16050 | <i>T. brucei</i> | 61  | 777  | 837  |
| Tbg972.10.16050 | <i>T. brucei</i> | 57  | 1778 | 1834 |
| Tbg972.10.16050 | <i>T. brucei</i> | 57  | 1778 | 1834 |
| Tbg972.10.16070 | <i>T. brucei</i> | 60  | 40   | 99   |
| Tbg972.10.16080 | <i>T. brucei</i> | 89  | 63   | 151  |
| Tbg972.10.1610  | <i>T. brucei</i> | 70  | 1    | 70   |

|                 |                  |     |      |      |
|-----------------|------------------|-----|------|------|
| Tbg972.10.1610  | <i>T. brucei</i> | 61  | 184  | 244  |
| Tbg972.10.1610  | <i>T. brucei</i> | 61  | 184  | 244  |
| Tbg972.10.16100 | <i>T. brucei</i> | 195 | 407  | 601  |
| Tbg972.10.16100 | <i>T. brucei</i> | 62  | 821  | 882  |
| Tbg972.10.16100 | <i>T. brucei</i> | 116 | 907  | 1022 |
| Tbg972.10.16100 | <i>T. brucei</i> | 209 | 1061 | 1269 |
| Tbg972.10.16120 | <i>T. brucei</i> | 60  | 1    | 60   |
| Tbg972.10.16120 | <i>T. brucei</i> | 102 | 127  | 228  |
| Tbg972.10.16120 | <i>T. brucei</i> | 62  | 284  | 345  |
| Tbg972.10.16120 | <i>T. brucei</i> | 106 | 498  | 603  |
| Tbg972.10.16120 | <i>T. brucei</i> | 62  | 808  | 869  |
| Tbg972.10.16120 | <i>T. brucei</i> | 56  | 885  | 940  |
| Tbg972.10.16120 | <i>T. brucei</i> | 86  | 1032 | 1117 |
| Tbg972.10.16140 | <i>T. brucei</i> | 40  | 366  | 405  |
| Tbg972.10.16150 | <i>T. brucei</i> | 89  | 1    | 89   |
| Tbg972.10.16160 | <i>T. brucei</i> | 51  | 37   | 87   |
| Tbg972.10.16160 | <i>T. brucei</i> | 78  | 194  | 271  |
| Tbg972.10.16160 | <i>T. brucei</i> | 78  | 194  | 271  |
| Tbg972.10.16170 | <i>T. brucei</i> | 47  | 154  | 200  |
| Tbg972.10.16170 | <i>T. brucei</i> | 56  | 549  | 604  |
| Tbg972.10.16170 | <i>T. brucei</i> | 56  | 549  | 604  |
| Tbg972.10.16180 | <i>T. brucei</i> | 45  | 106  | 150  |
| Tbg972.10.1620  | <i>T. brucei</i> | 111 | 1    | 111  |
| Tbg972.10.16230 | <i>T. brucei</i> | 147 | 1    | 147  |
| Tbg972.10.16230 | <i>T. brucei</i> | 104 | 339  | 442  |
| Tbg972.10.16250 | <i>T. brucei</i> | 56  | 76   | 131  |
| Tbg972.10.16260 | <i>T. brucei</i> | 85  | 138  | 222  |
| Tbg972.10.16260 | <i>T. brucei</i> | 74  | 344  | 417  |
| Tbg972.10.16260 | <i>T. brucei</i> | 71  | 770  | 840  |
| Tbg972.10.16300 | <i>T. brucei</i> | 48  | 1    | 48   |
| Tbg972.10.16330 | <i>T. brucei</i> | 137 | 112  | 248  |
| Tbg972.10.16330 | <i>T. brucei</i> | 101 | 277  | 377  |
| Tbg972.10.16360 | <i>T. brucei</i> | 79  | 1    | 79   |
| Tbg972.10.16360 | <i>T. brucei</i> | 164 | 204  | 367  |
| Tbg972.10.16370 | <i>T. brucei</i> | 52  | 551  | 602  |
| Tbg972.10.16400 | <i>T. brucei</i> | 89  | 1    | 89   |
| Tbg972.10.16410 | <i>T. brucei</i> | 108 | 1    | 108  |
| Tbg972.10.16420 | <i>T. brucei</i> | 47  | 192  | 238  |
| Tbg972.10.16430 | <i>T. brucei</i> | 114 | 97   | 210  |
| Tbg972.10.16480 | <i>T. brucei</i> | 117 | 14   | 130  |
| Tbg972.10.1650  | <i>T. brucei</i> | 60  | 63   | 122  |
| Tbg972.10.16530 | <i>T. brucei</i> | 479 | 1    | 479  |
| Tbg972.10.16540 | <i>T. brucei</i> | 45  | 1    | 45   |
| Tbg972.10.16560 | <i>T. brucei</i> | 53  | 1    | 53   |
| Tbg972.10.16570 | <i>T. brucei</i> | 69  | 1    | 69   |
| Tbg972.10.16580 | <i>T. brucei</i> | 80  | 31   | 110  |
| Tbg972.10.16580 | <i>T. brucei</i> | 46  | 298  | 343  |

|                 |                  |     |      |      |
|-----------------|------------------|-----|------|------|
| Tbg972.10.16580 | <i>T. brucei</i> | 46  | 395  | 440  |
| Tbg972.10.16590 | <i>T. brucei</i> | 162 | 82   | 243  |
| Tbg972.10.1660  | <i>T. brucei</i> | 41  | 1    | 41   |
| Tbg972.10.1660  | <i>T. brucei</i> | 75  | 61   | 135  |
| Tbg972.10.1660  | <i>T. brucei</i> | 239 | 173  | 411  |
| Tbg972.10.1660  | <i>T. brucei</i> | 961 | 463  | 1423 |
| Tbg972.10.1660  | <i>T. brucei</i> | 58  | 1582 | 1639 |
| Tbg972.10.1660  | <i>T. brucei</i> | 66  | 1714 | 1779 |
| Tbg972.10.1660  | <i>T. brucei</i> | 377 | 1809 | 2185 |
| Tbg972.10.1660  | <i>T. brucei</i> | 86  | 2206 | 2291 |
| Tbg972.10.1660  | <i>T. brucei</i> | 64  | 2335 | 2398 |
| Tbg972.10.16600 | <i>T. brucei</i> | 42  | 118  | 159  |
| Tbg972.10.16610 | <i>T. brucei</i> | 50  | 179  | 228  |
| Tbg972.10.16620 | <i>T. brucei</i> | 64  | 207  | 270  |
| Tbg972.10.16620 | <i>T. brucei</i> | 104 | 471  | 574  |
| Tbg972.10.16620 | <i>T. brucei</i> | 42  | 613  | 654  |
| Tbg972.10.16620 | <i>T. brucei</i> | 46  | 723  | 768  |
| Tbg972.10.16620 | <i>T. brucei</i> | 75  | 814  | 888  |
| Tbg972.10.16620 | <i>T. brucei</i> | 40  | 1129 | 1168 |
| Tbg972.10.1670  | <i>T. brucei</i> | 43  | 82   | 124  |
| Tbg972.10.16700 | <i>T. brucei</i> | 44  | 115  | 158  |
| Tbg972.10.16710 | <i>T. brucei</i> | 71  | 94   | 164  |
| Tbg972.10.16710 | <i>T. brucei</i> | 167 | 245  | 411  |
| Tbg972.10.16710 | <i>T. brucei</i> | 292 | 441  | 732  |
| Tbg972.10.16740 | <i>T. brucei</i> | 78  | 107  | 184  |
| Tbg972.10.16780 | <i>T. brucei</i> | 54  | 686  | 739  |
| Tbg972.10.1680  | <i>T. brucei</i> | 74  | 637  | 710  |
| Tbg972.10.16820 | <i>T. brucei</i> | 47  | 154  | 200  |
| Tbg972.10.16820 | <i>T. brucei</i> | 56  | 549  | 604  |
| Tbg972.10.16820 | <i>T. brucei</i> | 56  | 549  | 604  |
| Tbg972.10.16840 | <i>T. brucei</i> | 44  | 160  | 203  |
| Tbg972.10.16850 | <i>T. brucei</i> | 297 | 81   | 377  |
| Tbg972.10.16860 | <i>T. brucei</i> | 105 | 1    | 105  |
| Tbg972.10.16860 | <i>T. brucei</i> | 47  | 252  | 298  |
| Tbg972.10.16860 | <i>T. brucei</i> | 47  | 252  | 298  |
| Tbg972.10.16880 | <i>T. brucei</i> | 87  | 387  | 473  |
| Tbg972.10.16900 | <i>T. brucei</i> | 42  | 24   | 65   |
| Tbg972.10.16900 | <i>T. brucei</i> | 53  | 91   | 143  |
| Tbg972.10.16900 | <i>T. brucei</i> | 57  | 161  | 217  |
| Tbg972.10.16910 | <i>T. brucei</i> | 44  | 49   | 92   |
| Tbg972.10.16950 | <i>T. brucei</i> | 47  | 1    | 47   |
| Tbg972.10.16950 | <i>T. brucei</i> | 63  | 138  | 200  |
| Tbg972.10.16950 | <i>T. brucei</i> | 63  | 138  | 200  |
| Tbg972.10.16970 | <i>T. brucei</i> | 189 | 123  | 311  |
| Tbg972.10.16970 | <i>T. brucei</i> | 44  | 388  | 431  |
| Tbg972.10.1700  | <i>T. brucei</i> | 73  | 1    | 73   |
| Tbg972.10.17000 | <i>T. brucei</i> | 68  | 107  | 174  |

|                 |                  |     |     |      |
|-----------------|------------------|-----|-----|------|
| Tbg972.10.17010 | <i>T. brucei</i> | 46  | 109 | 154  |
| Tbg972.10.17020 | <i>T. brucei</i> | 44  | 1   | 44   |
| Tbg972.10.17020 | <i>T. brucei</i> | 74  | 269 | 342  |
| Tbg972.10.17020 | <i>T. brucei</i> | 74  | 269 | 342  |
| Tbg972.10.17030 | <i>T. brucei</i> | 90  | 32  | 121  |
| Tbg972.10.17070 | <i>T. brucei</i> | 207 | 47  | 253  |
| Tbg972.10.17070 | <i>T. brucei</i> | 44  | 302 | 345  |
| Tbg972.10.17070 | <i>T. brucei</i> | 44  | 302 | 345  |
| Tbg972.10.17090 | <i>T. brucei</i> | 81  | 156 | 236  |
| Tbg972.10.17100 | <i>T. brucei</i> | 81  | 12  | 92   |
| Tbg972.10.17120 | <i>T. brucei</i> | 47  | 101 | 147  |
| Tbg972.10.17140 | <i>T. brucei</i> | 56  | 98  | 153  |
| Tbg972.10.17150 | <i>T. brucei</i> | 203 | 131 | 333  |
| Tbg972.10.17180 | <i>T. brucei</i> | 66  | 1   | 66   |
| Tbg972.10.17180 | <i>T. brucei</i> | 46  | 262 | 307  |
| Tbg972.10.17180 | <i>T. brucei</i> | 46  | 262 | 307  |
| Tbg972.10.17210 | <i>T. brucei</i> | 50  | 119 | 168  |
| Tbg972.10.17210 | <i>T. brucei</i> | 119 | 345 | 463  |
| Tbg972.10.17230 | <i>T. brucei</i> | 71  | 350 | 420  |
| Tbg972.10.17270 | <i>T. brucei</i> | 89  | 1   | 89   |
| Tbg972.10.17280 | <i>T. brucei</i> | 98  | 11  | 108  |
| Tbg972.10.17290 | <i>T. brucei</i> | 46  | 193 | 238  |
| Tbg972.10.17300 | <i>T. brucei</i> | 114 | 97  | 210  |
| Tbg972.10.17330 | <i>T. brucei</i> | 40  | 93  | 132  |
| Tbg972.10.17340 | <i>T. brucei</i> | 44  | 1   | 44   |
| Tbg972.10.17340 | <i>T. brucei</i> | 59  | 127 | 185  |
| Tbg972.10.17340 | <i>T. brucei</i> | 141 | 191 | 331  |
| Tbg972.10.17340 | <i>T. brucei</i> | 68  | 339 | 406  |
| Tbg972.10.17340 | <i>T. brucei</i> | 45  | 471 | 515  |
| Tbg972.10.17380 | <i>T. brucei</i> | 266 | 1   | 266  |
| Tbg972.10.17380 | <i>T. brucei</i> | 55  | 636 | 690  |
| Tbg972.10.17380 | <i>T. brucei</i> | 146 | 784 | 929  |
| Tbg972.10.17380 | <i>T. brucei</i> | 100 | 984 | 1083 |
| Tbg972.10.17390 | <i>T. brucei</i> | 67  | 31  | 97   |
| Tbg972.10.1740  | <i>T. brucei</i> | 373 | 1   | 373  |
| Tbg972.10.17400 | <i>T. brucei</i> | 103 | 24  | 126  |
| Tbg972.10.17400 | <i>T. brucei</i> | 127 | 148 | 274  |
| Tbg972.10.17400 | <i>T. brucei</i> | 40  | 409 | 448  |
| Tbg972.10.17400 | <i>T. brucei</i> | 53  | 852 | 904  |
| Tbg972.10.17400 | <i>T. brucei</i> | 55  | 959 | 1013 |
| Tbg972.10.17410 | <i>T. brucei</i> | 301 | 1   | 301  |
| Tbg972.10.17410 | <i>T. brucei</i> | 206 | 376 | 581  |
| Tbg972.10.17410 | <i>T. brucei</i> | 285 | 583 | 867  |
| Tbg972.10.17420 | <i>T. brucei</i> | 40  | 64  | 103  |
| Tbg972.10.17430 | <i>T. brucei</i> | 50  | 1   | 50   |
| Tbg972.10.17430 | <i>T. brucei</i> | 147 | 87  | 233  |
| Tbg972.10.17430 | <i>T. brucei</i> | 63  | 296 | 358  |

|                 |                  |     |      |      |
|-----------------|------------------|-----|------|------|
| Tbg972.10.17430 | <i>T. brucei</i> | 71  | 507  | 577  |
| Tbg972.10.17430 | <i>T. brucei</i> | 181 | 580  | 760  |
| Tbg972.10.17430 | <i>T. brucei</i> | 206 | 770  | 975  |
| Tbg972.10.17430 | <i>T. brucei</i> | 196 | 978  | 1173 |
| Tbg972.10.17450 | <i>T. brucei</i> | 125 | 202  | 326  |
| Tbg972.10.17460 | <i>T. brucei</i> | 44  | 77   | 120  |
| Tbg972.10.17470 | <i>T. brucei</i> | 68  | 199  | 266  |
| Tbg972.10.17490 | <i>T. brucei</i> | 70  | 26   | 95   |
| Tbg972.10.17490 | <i>T. brucei</i> | 48  | 133  | 180  |
| Tbg972.10.17490 | <i>T. brucei</i> | 92  | 465  | 556  |
| Tbg972.10.17500 | <i>T. brucei</i> | 146 | 103  | 248  |
| Tbg972.10.17500 | <i>T. brucei</i> | 41  | 312  | 352  |
| Tbg972.10.17500 | <i>T. brucei</i> | 55  | 373  | 427  |
| Tbg972.10.17500 | <i>T. brucei</i> | 53  | 560  | 612  |
| Tbg972.10.17500 | <i>T. brucei</i> | 44  | 621  | 664  |
| Tbg972.10.17500 | <i>T. brucei</i> | 61  | 758  | 818  |
| Tbg972.10.17500 | <i>T. brucei</i> | 52  | 835  | 886  |
| Tbg972.10.17510 | <i>T. brucei</i> | 61  | 65   | 125  |
| Tbg972.10.17510 | <i>T. brucei</i> | 57  | 294  | 350  |
| Tbg972.10.17510 | <i>T. brucei</i> | 629 | 397  | 1025 |
| Tbg972.10.17510 | <i>T. brucei</i> | 232 | 1030 | 1261 |
| Tbg972.10.17520 | <i>T. brucei</i> | 102 | 18   | 119  |
| Tbg972.10.17530 | <i>T. brucei</i> | 201 | 282  | 482  |
| Tbg972.10.17530 | <i>T. brucei</i> | 430 | 496  | 925  |
| Tbg972.10.17530 | <i>T. brucei</i> | 147 | 940  | 1086 |
| Tbg972.10.17530 | <i>T. brucei</i> | 246 | 1195 | 1440 |
| Tbg972.10.17540 | <i>T. brucei</i> | 40  | 75   | 114  |
| Tbg972.10.17550 | <i>T. brucei</i> | 46  | 377  | 422  |
| Tbg972.10.17550 | <i>T. brucei</i> | 65  | 713  | 777  |
| Tbg972.10.17550 | <i>T. brucei</i> | 65  | 713  | 777  |
| Tbg972.10.17560 | <i>T. brucei</i> | 68  | 1    | 68   |
| Tbg972.10.17560 | <i>T. brucei</i> | 53  | 179  | 231  |
| Tbg972.10.17560 | <i>T. brucei</i> | 53  | 179  | 231  |
| Tbg972.10.17570 | <i>T. brucei</i> | 50  | 1    | 50   |
| Tbg972.10.17570 | <i>T. brucei</i> | 62  | 52   | 113  |
| Tbg972.10.17580 | <i>T. brucei</i> | 52  | 1    | 52   |
| Tbg972.10.17580 | <i>T. brucei</i> | 119 | 96   | 214  |
| Tbg972.10.17580 | <i>T. brucei</i> | 87  | 323  | 409  |
| Tbg972.10.17580 | <i>T. brucei</i> | 131 | 599  | 729  |
| Tbg972.10.17580 | <i>T. brucei</i> | 209 | 804  | 1012 |
| Tbg972.10.17590 | <i>T. brucei</i> | 82  | 156  | 237  |
| Tbg972.10.17590 | <i>T. brucei</i> | 45  | 396  | 440  |
| Tbg972.10.17590 | <i>T. brucei</i> | 86  | 726  | 811  |
| Tbg972.10.17590 | <i>T. brucei</i> | 69  | 1073 | 1141 |
| Tbg972.10.1760  | <i>T. brucei</i> | 61  | 801  | 861  |
| Tbg972.10.1760  | <i>T. brucei</i> | 68  | 1120 | 1187 |
| Tbg972.10.1760  | <i>T. brucei</i> | 40  | 1336 | 1375 |

|                 |                  |     |      |      |
|-----------------|------------------|-----|------|------|
| Tbg972.10.1760  | <i>T. brucei</i> | 99  | 1604 | 1702 |
| Tbg972.10.1760  | <i>T. brucei</i> | 74  | 1715 | 1788 |
| Tbg972.10.1760  | <i>T. brucei</i> | 48  | 2087 | 2134 |
| Tbg972.10.17610 | <i>T. brucei</i> | 298 | 1    | 298  |
| Tbg972.10.17610 | <i>T. brucei</i> | 45  | 382  | 426  |
| Tbg972.10.17610 | <i>T. brucei</i> | 226 | 640  | 865  |
| Tbg972.10.17620 | <i>T. brucei</i> | 167 | 51   | 217  |
| Tbg972.10.17620 | <i>T. brucei</i> | 118 | 274  | 391  |
| Tbg972.10.17630 | <i>T. brucei</i> | 87  | 22   | 108  |
| Tbg972.10.17640 | <i>T. brucei</i> | 286 | 1    | 286  |
| Tbg972.10.17650 | <i>T. brucei</i> | 50  | 79   | 128  |
| Tbg972.10.17650 | <i>T. brucei</i> | 53  | 802  | 854  |
| Tbg972.10.17650 | <i>T. brucei</i> | 53  | 802  | 854  |
| Tbg972.10.17660 | <i>T. brucei</i> | 315 | 152  | 466  |
| Tbg972.10.17670 | <i>T. brucei</i> | 43  | 1    | 43   |
| Tbg972.10.17670 | <i>T. brucei</i> | 50  | 332  | 381  |
| Tbg972.10.17700 | <i>T. brucei</i> | 103 | 1    | 103  |
| Tbg972.10.17700 | <i>T. brucei</i> | 119 | 498  | 616  |
| Tbg972.10.17710 | <i>T. brucei</i> | 47  | 1    | 47   |
| Tbg972.10.17710 | <i>T. brucei</i> | 63  | 235  | 297  |
| Tbg972.10.17710 | <i>T. brucei</i> | 40  | 446  | 485  |
| Tbg972.10.17710 | <i>T. brucei</i> | 40  | 569  | 608  |
| Tbg972.10.17720 | <i>T. brucei</i> | 48  | 671  | 718  |
| Tbg972.10.17730 | <i>T. brucei</i> | 41  | 126  | 166  |
| Tbg972.10.17740 | <i>T. brucei</i> | 53  | 167  | 219  |
| Tbg972.10.17750 | <i>T. brucei</i> | 47  | 1    | 47   |
| Tbg972.10.17760 | <i>T. brucei</i> | 169 | 318  | 486  |
| Tbg972.10.17760 | <i>T. brucei</i> | 43  | 621  | 663  |
| Tbg972.10.17770 | <i>T. brucei</i> | 60  | 1    | 60   |
| Tbg972.10.17770 | <i>T. brucei</i> | 85  | 113  | 197  |
| Tbg972.10.17770 | <i>T. brucei</i> | 44  | 230  | 273  |
| Tbg972.10.17790 | <i>T. brucei</i> | 41  | 62   | 102  |
| Tbg972.10.17800 | <i>T. brucei</i> | 44  | 1    | 44   |
| Tbg972.10.17820 | <i>T. brucei</i> | 72  | 1    | 72   |
| Tbg972.10.17820 | <i>T. brucei</i> | 40  | 304  | 343  |
| Tbg972.10.17840 | <i>T. brucei</i> | 75  | 1    | 75   |
| Tbg972.10.17840 | <i>T. brucei</i> | 47  | 261  | 307  |
| Tbg972.10.17850 | <i>T. brucei</i> | 52  | 1    | 52   |
| Tbg972.10.17850 | <i>T. brucei</i> | 55  | 87   | 141  |
| Tbg972.10.17850 | <i>T. brucei</i> | 49  | 186  | 234  |
| Tbg972.10.17860 | <i>T. brucei</i> | 178 | 1    | 178  |
| Tbg972.10.17860 | <i>T. brucei</i> | 83  | 260  | 342  |
| Tbg972.10.17870 | <i>T. brucei</i> | 47  | 1    | 47   |
| Tbg972.10.17880 | <i>T. brucei</i> | 157 | 1    | 157  |
| Tbg972.10.17880 | <i>T. brucei</i> | 52  | 267  | 318  |
| Tbg972.10.17890 | <i>T. brucei</i> | 384 | 60   | 443  |
| Tbg972.10.1790  | <i>T. brucei</i> | 145 | 125  | 269  |

|                 |                  |     |     |     |
|-----------------|------------------|-----|-----|-----|
| Tbg972.10.17900 | <i>T. brucei</i> | 60  | 1   | 60  |
| Tbg972.10.17900 | <i>T. brucei</i> | 85  | 113 | 197 |
| Tbg972.10.17900 | <i>T. brucei</i> | 44  | 230 | 273 |
| Tbg972.10.17910 | <i>T. brucei</i> | 71  | 1   | 71  |
| Tbg972.10.17920 | <i>T. brucei</i> | 154 | 1   | 154 |
| Tbg972.10.17930 | <i>T. brucei</i> | 201 | 363 | 563 |
| Tbg972.10.17970 | <i>T. brucei</i> | 76  | 312 | 387 |
| Tbg972.10.17980 | <i>T. brucei</i> | 83  | 1   | 83  |
| Tbg972.10.180   | <i>T. brucei</i> | 66  | 1   | 66  |
| Tbg972.10.1800  | <i>T. brucei</i> | 118 | 185 | 302 |
| Tbg972.10.1800  | <i>T. brucei</i> | 228 | 588 | 815 |
| Tbg972.10.18010 | <i>T. brucei</i> | 106 | 1   | 106 |
| Tbg972.10.18020 | <i>T. brucei</i> | 105 | 1   | 105 |
| Tbg972.10.18030 | <i>T. brucei</i> | 105 | 18  | 122 |
| Tbg972.10.18040 | <i>T. brucei</i> | 126 | 35  | 160 |
| Tbg972.10.18040 | <i>T. brucei</i> | 80  | 472 | 551 |
| Tbg972.10.18040 | <i>T. brucei</i> | 56  | 666 | 721 |
| Tbg972.10.18050 | <i>T. brucei</i> | 44  | 360 | 403 |
| Tbg972.10.18070 | <i>T. brucei</i> | 69  | 130 | 198 |
| Tbg972.10.18070 | <i>T. brucei</i> | 154 | 256 | 409 |
| Tbg972.10.18070 | <i>T. brucei</i> | 41  | 421 | 461 |
| Tbg972.10.18080 | <i>T. brucei</i> | 52  | 59  | 110 |
| Tbg972.10.18080 | <i>T. brucei</i> | 42  | 327 | 368 |
| Tbg972.10.18080 | <i>T. brucei</i> | 42  | 327 | 368 |
| Tbg972.10.1810  | <i>T. brucei</i> | 60  | 1   | 60  |
| Tbg972.10.18120 | <i>T. brucei</i> | 110 | 408 | 517 |
| Tbg972.10.18140 | <i>T. brucei</i> | 84  | 136 | 219 |
| Tbg972.10.18180 | <i>T. brucei</i> | 122 | 138 | 259 |
| Tbg972.10.18180 | <i>T. brucei</i> | 124 | 309 | 432 |
| Tbg972.10.18190 | <i>T. brucei</i> | 47  | 1   | 47  |
| Tbg972.10.18190 | <i>T. brucei</i> | 67  | 53  | 119 |
| Tbg972.10.18190 | <i>T. brucei</i> | 67  | 53  | 119 |
| Tbg972.10.1820  | <i>T. brucei</i> | 87  | 1   | 87  |
| Tbg972.10.1820  | <i>T. brucei</i> | 221 | 344 | 564 |
| Tbg972.10.18220 | <i>T. brucei</i> | 48  | 393 | 440 |
| Tbg972.10.18230 | <i>T. brucei</i> | 65  | 52  | 116 |
| Tbg972.10.18270 | <i>T. brucei</i> | 123 | 1   | 123 |
| Tbg972.10.18270 | <i>T. brucei</i> | 67  | 125 | 191 |
| Tbg972.10.18270 | <i>T. brucei</i> | 67  | 125 | 191 |
| Tbg972.10.18280 | <i>T. brucei</i> | 187 | 1   | 187 |
| Tbg972.10.18280 | <i>T. brucei</i> | 82  | 281 | 362 |
| Tbg972.10.18280 | <i>T. brucei</i> | 101 | 394 | 494 |
| Tbg972.10.18280 | <i>T. brucei</i> | 42  | 598 | 639 |
| Tbg972.10.18280 | <i>T. brucei</i> | 104 | 742 | 845 |
| Tbg972.10.18280 | <i>T. brucei</i> | 53  | 941 | 993 |
| Tbg972.10.18330 | <i>T. brucei</i> | 99  | 1   | 99  |
| Tbg972.10.18330 | <i>T. brucei</i> | 66  | 116 | 181 |



|                 |                  |     |      |      |
|-----------------|------------------|-----|------|------|
| Tbg972.10.18330 | <i>T. brucei</i> | 109 | 183  | 291  |
| Tbg972.10.18330 | <i>T. brucei</i> | 43  | 369  | 411  |
| Tbg972.10.18330 | <i>T. brucei</i> | 45  | 478  | 522  |
| Tbg972.10.18340 | <i>T. brucei</i> | 47  | 66   | 112  |
| Tbg972.10.18350 | <i>T. brucei</i> | 47  | 1    | 47   |
| Tbg972.10.18350 | <i>T. brucei</i> | 47  | 72   | 118  |
| Tbg972.10.18370 | <i>T. brucei</i> | 66  | 30   | 95   |
| Tbg972.10.18370 | <i>T. brucei</i> | 217 | 262  | 478  |
| Tbg972.10.18370 | <i>T. brucei</i> | 59  | 625  | 683  |
| Tbg972.10.18370 | <i>T. brucei</i> | 50  | 1161 | 1210 |
| Tbg972.10.18370 | <i>T. brucei</i> | 142 | 1387 | 1528 |
| Tbg972.10.1840  | <i>T. brucei</i> | 41  | 201  | 241  |
| Tbg972.10.1840  | <i>T. brucei</i> | 45  | 665  | 709  |
| Tbg972.10.1840  | <i>T. brucei</i> | 46  | 747  | 792  |
| Tbg972.10.18440 | <i>T. brucei</i> | 45  | 49   | 93   |
| Tbg972.10.18450 | <i>T. brucei</i> | 47  | 50   | 96   |
| Tbg972.10.18460 | <i>T. brucei</i> | 65  | 1    | 65   |
| Tbg972.10.18460 | <i>T. brucei</i> | 42  | 653  | 694  |
| Tbg972.10.18460 | <i>T. brucei</i> | 42  | 653  | 694  |
| Tbg972.10.18470 | <i>T. brucei</i> | 153 | 212  | 364  |
| Tbg972.10.18480 | <i>T. brucei</i> | 125 | 67   | 191  |
| Tbg972.10.18480 | <i>T. brucei</i> | 318 | 196  | 513  |
| Tbg972.10.18480 | <i>T. brucei</i> | 69  | 526  | 594  |
| Tbg972.10.18490 | <i>T. brucei</i> | 128 | 64   | 191  |
| Tbg972.10.18490 | <i>T. brucei</i> | 41  | 199  | 239  |
| Tbg972.10.1850  | <i>T. brucei</i> | 55  | 1    | 55   |
| Tbg972.10.18500 | <i>T. brucei</i> | 46  | 69   | 114  |
| Tbg972.10.18500 | <i>T. brucei</i> | 113 | 147  | 259  |
| Tbg972.10.18510 | <i>T. brucei</i> | 57  | 11   | 67   |
| Tbg972.10.18520 | <i>T. brucei</i> | 91  | 41   | 131  |
| Tbg972.10.18520 | <i>T. brucei</i> | 47  | 163  | 209  |
| Tbg972.10.18520 | <i>T. brucei</i> | 47  | 163  | 209  |
| Tbg972.10.18530 | <i>T. brucei</i> | 72  | 87   | 158  |
| Tbg972.10.18530 | <i>T. brucei</i> | 111 | 199  | 309  |
| Tbg972.10.18530 | <i>T. brucei</i> | 227 | 377  | 603  |
| Tbg972.10.18530 | <i>T. brucei</i> | 82  | 702  | 783  |
| Tbg972.10.18530 | <i>T. brucei</i> | 42  | 794  | 835  |
| Tbg972.10.18530 | <i>T. brucei</i> | 104 | 868  | 971  |
| Tbg972.10.18530 | <i>T. brucei</i> | 56  | 1052 | 1107 |
| Tbg972.10.18530 | <i>T. brucei</i> | 57  | 1158 | 1214 |
| Tbg972.10.18540 | <i>T. brucei</i> | 66  | 201  | 266  |
| Tbg972.10.18540 | <i>T. brucei</i> | 61  | 425  | 485  |
| Tbg972.10.18540 | <i>T. brucei</i> | 61  | 425  | 485  |
| Tbg972.10.18560 | <i>T. brucei</i> | 169 | 1    | 169  |
| Tbg972.10.18560 | <i>T. brucei</i> | 47  | 300  | 346  |
| Tbg972.10.18560 | <i>T. brucei</i> | 162 | 411  | 572  |
| Tbg972.10.18560 | <i>T. brucei</i> | 169 | 583  | 751  |

|                 |                  |     |      |      |
|-----------------|------------------|-----|------|------|
| Tbg972.10.18570 | <i>T. brucei</i> | 40  | 69   | 108  |
| Tbg972.10.18580 | <i>T. brucei</i> | 63  | 102  | 164  |
| Tbg972.10.18580 | <i>T. brucei</i> | 59  | 192  | 250  |
| Tbg972.10.18580 | <i>T. brucei</i> | 62  | 524  | 585  |
| Tbg972.10.18580 | <i>T. brucei</i> | 57  | 846  | 902  |
| Tbg972.10.18580 | <i>T. brucei</i> | 69  | 976  | 1044 |
| Tbg972.10.18580 | <i>T. brucei</i> | 93  | 1106 | 1198 |
| Tbg972.10.18590 | <i>T. brucei</i> | 53  | 78   | 130  |
| Tbg972.10.18590 | <i>T. brucei</i> | 76  | 191  | 266  |
| Tbg972.10.18590 | <i>T. brucei</i> | 40  | 1353 | 1392 |
| Tbg972.10.18590 | <i>T. brucei</i> | 207 | 1412 | 1618 |
| Tbg972.10.18620 | <i>T. brucei</i> | 175 | 8    | 182  |
| Tbg972.10.18620 | <i>T. brucei</i> | 91  | 285  | 375  |
| Tbg972.10.18620 | <i>T. brucei</i> | 110 | 626  | 735  |
| Tbg972.10.18620 | <i>T. brucei</i> | 283 | 774  | 1056 |
| Tbg972.10.18620 | <i>T. brucei</i> | 50  | 1070 | 1119 |
| Tbg972.10.18650 | <i>T. brucei</i> | 165 | 1    | 165  |
| Tbg972.10.18650 | <i>T. brucei</i> | 95  | 225  | 319  |
| Tbg972.10.18650 | <i>T. brucei</i> | 61  | 347  | 407  |
| Tbg972.10.18700 | <i>T. brucei</i> | 40  | 265  | 304  |
| Tbg972.10.18700 | <i>T. brucei</i> | 97  | 349  | 445  |
| Tbg972.10.18700 | <i>T. brucei</i> | 41  | 615  | 655  |
| Tbg972.10.18750 | <i>T. brucei</i> | 110 | 1129 | 1238 |
| Tbg972.10.18750 | <i>T. brucei</i> | 125 | 1278 | 1402 |
| Tbg972.10.18750 | <i>T. brucei</i> | 190 | 1407 | 1596 |
| Tbg972.10.18750 | <i>T. brucei</i> | 95  | 1675 | 1769 |
| Tbg972.10.18760 | <i>T. brucei</i> | 63  | 1    | 63   |
| Tbg972.10.18760 | <i>T. brucei</i> | 47  | 100  | 146  |
| Tbg972.10.18770 | <i>T. brucei</i> | 54  | 1    | 54   |
| Tbg972.10.18770 | <i>T. brucei</i> | 60  | 221  | 280  |
| Tbg972.10.18780 | <i>T. brucei</i> | 154 | 105  | 258  |
| Tbg972.10.18790 | <i>T. brucei</i> | 62  | 1    | 62   |
| Tbg972.10.18790 | <i>T. brucei</i> | 47  | 142  | 188  |
| Tbg972.10.18790 | <i>T. brucei</i> | 92  | 239  | 330  |
| Tbg972.10.18790 | <i>T. brucei</i> | 89  | 632  | 720  |
| Tbg972.10.18790 | <i>T. brucei</i> | 63  | 781  | 843  |
| Tbg972.10.18790 | <i>T. brucei</i> | 245 | 851  | 1095 |
| Tbg972.10.1880  | <i>T. brucei</i> | 42  | 1    | 42   |
| Tbg972.10.1880  | <i>T. brucei</i> | 41  | 69   | 109  |
| Tbg972.10.1880  | <i>T. brucei</i> | 41  | 69   | 109  |
| Tbg972.10.18810 | <i>T. brucei</i> | 45  | 1    | 45   |
| Tbg972.10.18810 | <i>T. brucei</i> | 55  | 161  | 215  |
| Tbg972.10.18810 | <i>T. brucei</i> | 109 | 480  | 588  |
| Tbg972.10.18810 | <i>T. brucei</i> | 82  | 677  | 758  |
| Tbg972.10.18810 | <i>T. brucei</i> | 73  | 775  | 847  |
| Tbg972.10.18810 | <i>T. brucei</i> | 226 | 903  | 1128 |
| Tbg972.10.18810 | <i>T. brucei</i> | 44  | 1547 | 1590 |

|                 |                  |     |      |      |
|-----------------|------------------|-----|------|------|
| Tbg972.10.18810 | <i>T. brucei</i> | 72  | 1611 | 1682 |
| Tbg972.10.18840 | <i>T. brucei</i> | 82  | 309  | 390  |
| Tbg972.10.18850 | <i>T. brucei</i> | 93  | 425  | 517  |
| Tbg972.10.18860 | <i>T. brucei</i> | 64  | 32   | 95   |
| Tbg972.10.18860 | <i>T. brucei</i> | 54  | 164  | 217  |
| Tbg972.10.18860 | <i>T. brucei</i> | 65  | 221  | 285  |
| Tbg972.10.18870 | <i>T. brucei</i> | 76  | 31   | 106  |
| Tbg972.10.18870 | <i>T. brucei</i> | 57  | 131  | 187  |
| Tbg972.10.18870 | <i>T. brucei</i> | 126 | 198  | 323  |
| Tbg972.10.18870 | <i>T. brucei</i> | 119 | 342  | 460  |
| Tbg972.10.18890 | <i>T. brucei</i> | 59  | 170  | 228  |
| Tbg972.10.1890  | <i>T. brucei</i> | 47  | 26   | 72   |
| Tbg972.10.18900 | <i>T. brucei</i> | 48  | 46   | 93   |
| Tbg972.10.18900 | <i>T. brucei</i> | 43  | 112  | 154  |
| Tbg972.10.18900 | <i>T. brucei</i> | 43  | 112  | 154  |
| Tbg972.10.18920 | <i>T. brucei</i> | 81  | 177  | 257  |
| Tbg972.10.18940 | <i>T. brucei</i> | 142 | 53   | 194  |
| Tbg972.10.18960 | <i>T. brucei</i> | 126 | 551  | 676  |
| Tbg972.10.18970 | <i>T. brucei</i> | 49  | 1    | 49   |
| Tbg972.10.18980 | <i>T. brucei</i> | 88  | 1    | 88   |
| Tbg972.10.18980 | <i>T. brucei</i> | 92  | 744  | 835  |
| Tbg972.10.18980 | <i>T. brucei</i> | 92  | 744  | 835  |
| Tbg972.10.19000 | <i>T. brucei</i> | 63  | 135  | 197  |
| Tbg972.10.19000 | <i>T. brucei</i> | 129 | 284  | 412  |
| Tbg972.10.19000 | <i>T. brucei</i> | 49  | 472  | 520  |
| Tbg972.10.19050 | <i>T. brucei</i> | 141 | 1    | 141  |
| Tbg972.10.19050 | <i>T. brucei</i> | 96  | 237  | 332  |
| Tbg972.10.19050 | <i>T. brucei</i> | 46  | 337  | 382  |
| Tbg972.10.19050 | <i>T. brucei</i> | 94  | 494  | 587  |
| Tbg972.10.19060 | <i>T. brucei</i> | 47  | 1    | 47   |
| Tbg972.10.19070 | <i>T. brucei</i> | 58  | 77   | 134  |
| Tbg972.10.19080 | <i>T. brucei</i> | 137 | 277  | 413  |
| Tbg972.10.19080 | <i>T. brucei</i> | 136 | 472  | 607  |
| Tbg972.10.19090 | <i>T. brucei</i> | 120 | 26   | 145  |
| Tbg972.10.19090 | <i>T. brucei</i> | 54  | 391  | 444  |
| Tbg972.10.1910  | <i>T. brucei</i> | 351 | 205  | 555  |
| Tbg972.10.19100 | <i>T. brucei</i> | 149 | 154  | 302  |
| Tbg972.10.19100 | <i>T. brucei</i> | 71  | 457  | 527  |
| Tbg972.10.19100 | <i>T. brucei</i> | 83  | 651  | 733  |
| Tbg972.10.19100 | <i>T. brucei</i> | 40  | 740  | 779  |
| Tbg972.10.19110 | <i>T. brucei</i> | 47  | 38   | 84   |
| Tbg972.10.19110 | <i>T. brucei</i> | 46  | 274  | 319  |
| Tbg972.10.19110 | <i>T. brucei</i> | 46  | 274  | 319  |
| Tbg972.10.19120 | <i>T. brucei</i> | 40  | 138  | 177  |
| Tbg972.10.19120 | <i>T. brucei</i> | 48  | 363  | 410  |
| Tbg972.10.19120 | <i>T. brucei</i> | 96  | 490  | 585  |
| Tbg972.10.19120 | <i>T. brucei</i> | 673 | 726  | 1398 |

|                 |                  |      |      |      |
|-----------------|------------------|------|------|------|
| Tbg972.10.19120 | <i>T. brucei</i> | 113  | 1440 | 1552 |
| Tbg972.10.19120 | <i>T. brucei</i> | 42   | 1573 | 1614 |
| Tbg972.10.19120 | <i>T. brucei</i> | 40   | 1755 | 1794 |
| Tbg972.10.19120 | <i>T. brucei</i> | 124  | 1915 | 2038 |
| Tbg972.10.19140 | <i>T. brucei</i> | 1271 | 1    | 1271 |
| Tbg972.10.19140 | <i>T. brucei</i> | 1364 | 1326 | 2689 |
| Tbg972.10.19140 | <i>T. brucei</i> | 107  | 2704 | 2810 |
| Tbg972.10.1920  | <i>T. brucei</i> | 55   | 577  | 631  |
| Tbg972.10.19200 | <i>T. brucei</i> | 50   | 1    | 50   |
| Tbg972.10.19210 | <i>T. brucei</i> | 110  | 18   | 127  |
| Tbg972.10.19220 | <i>T. brucei</i> | 103  | 20   | 122  |
| Tbg972.10.19260 | <i>T. brucei</i> | 42   | 21   | 62   |
| Tbg972.10.19260 | <i>T. brucei</i> | 103  | 128  | 230  |
| Tbg972.10.19260 | <i>T. brucei</i> | 83   | 505  | 587  |
| Tbg972.10.19260 | <i>T. brucei</i> | 48   | 1027 | 1074 |
| Tbg972.10.19260 | <i>T. brucei</i> | 48   | 1386 | 1433 |
| Tbg972.10.19260 | <i>T. brucei</i> | 97   | 1647 | 1743 |
| Tbg972.10.19260 | <i>T. brucei</i> | 41   | 1842 | 1882 |
| Tbg972.10.19260 | <i>T. brucei</i> | 92   | 2083 | 2174 |
| Tbg972.10.19260 | <i>T. brucei</i> | 40   | 2353 | 2392 |
| Tbg972.10.19260 | <i>T. brucei</i> | 104  | 2690 | 2793 |
| Tbg972.10.19260 | <i>T. brucei</i> | 108  | 2799 | 2906 |
| Tbg972.10.19260 | <i>T. brucei</i> | 80   | 3195 | 3274 |
| Tbg972.10.19260 | <i>T. brucei</i> | 97   | 3318 | 3414 |
| Tbg972.10.19290 | <i>T. brucei</i> | 175  | 80   | 254  |
| Tbg972.10.19290 | <i>T. brucei</i> | 1801 | 292  | 2092 |
| Tbg972.10.19310 | <i>T. brucei</i> | 58   | 89   | 146  |
| Tbg972.10.19320 | <i>T. brucei</i> | 232  | 1    | 232  |
| Tbg972.10.19320 | <i>T. brucei</i> | 153  | 267  | 419  |
| Tbg972.10.19330 | <i>T. brucei</i> | 94   | 1    | 94   |
| Tbg972.10.19330 | <i>T. brucei</i> | 300  | 97   | 396  |
| Tbg972.10.19330 | <i>T. brucei</i> | 149  | 562  | 710  |
| Tbg972.10.19330 | <i>T. brucei</i> | 49   | 732  | 780  |
| Tbg972.10.19360 | <i>T. brucei</i> | 144  | 1    | 144  |
| Tbg972.10.19360 | <i>T. brucei</i> | 49   | 166  | 214  |
| Tbg972.10.19400 | <i>T. brucei</i> | 45   | 1    | 45   |
| Tbg972.10.19410 | <i>T. brucei</i> | 76   | 199  | 274  |
| Tbg972.10.19420 | <i>T. brucei</i> | 56   | 143  | 198  |
| Tbg972.10.19430 | <i>T. brucei</i> | 55   | 103  | 157  |
| Tbg972.10.19440 | <i>T. brucei</i> | 49   | 93   | 141  |
| Tbg972.10.19440 | <i>T. brucei</i> | 51   | 301  | 351  |
| Tbg972.10.19440 | <i>T. brucei</i> | 51   | 301  | 351  |
| Tbg972.10.19450 | <i>T. brucei</i> | 77   | 1    | 77   |
| Tbg972.10.19460 | <i>T. brucei</i> | 76   | 166  | 241  |
| Tbg972.10.19470 | <i>T. brucei</i> | 49   | 221  | 269  |
| Tbg972.10.19470 | <i>T. brucei</i> | 41   | 522  | 562  |
| Tbg972.10.19470 | <i>T. brucei</i> | 55   | 602  | 656  |

|                 |                  |     |      |      |
|-----------------|------------------|-----|------|------|
| Tbg972.10.19470 | <i>T. brucei</i> | 95  | 688  | 782  |
| Tbg972.10.19480 | <i>T. brucei</i> | 315 | 1    | 315  |
| Tbg972.10.19530 | <i>T. brucei</i> | 40  | 1    | 40   |
| Tbg972.10.19530 | <i>T. brucei</i> | 49  | 140  | 188  |
| Tbg972.10.19530 | <i>T. brucei</i> | 52  | 231  | 282  |
| Tbg972.10.19540 | <i>T. brucei</i> | 49  | 1    | 49   |
| Tbg972.10.19540 | <i>T. brucei</i> | 51  | 163  | 213  |
| Tbg972.10.19570 | <i>T. brucei</i> | 42  | 1    | 42   |
| Tbg972.10.19570 | <i>T. brucei</i> | 51  | 451  | 501  |
| Tbg972.10.19570 | <i>T. brucei</i> | 51  | 451  | 501  |
| Tbg972.10.19610 | <i>T. brucei</i> | 42  | 22   | 63   |
| Tbg972.10.19630 | <i>T. brucei</i> | 143 | 138  | 280  |
| Tbg972.10.19650 | <i>T. brucei</i> | 48  | 37   | 84   |
| Tbg972.10.19670 | <i>T. brucei</i> | 51  | 24   | 74   |
| Tbg972.10.1970  | <i>T. brucei</i> | 44  | 36   | 79   |
| Tbg972.10.19700 | <i>T. brucei</i> | 98  | 40   | 137  |
| Tbg972.10.19700 | <i>T. brucei</i> | 111 | 208  | 318  |
| Tbg972.10.19700 | <i>T. brucei</i> | 48  | 697  | 744  |
| Tbg972.10.19700 | <i>T. brucei</i> | 43  | 761  | 803  |
| Tbg972.10.19710 | <i>T. brucei</i> | 43  | 203  | 245  |
| Tbg972.10.19710 | <i>T. brucei</i> | 52  | 270  | 321  |
| Tbg972.10.19710 | <i>T. brucei</i> | 52  | 270  | 321  |
| Tbg972.10.19750 | <i>T. brucei</i> | 47  | 1    | 47   |
| Tbg972.10.19750 | <i>T. brucei</i> | 51  | 63   | 113  |
| Tbg972.10.19750 | <i>T. brucei</i> | 51  | 63   | 113  |
| Tbg972.10.19770 | <i>T. brucei</i> | 53  | 109  | 161  |
| Tbg972.10.19800 | <i>T. brucei</i> | 70  | 270  | 339  |
| Tbg972.10.19810 | <i>T. brucei</i> | 57  | 251  | 307  |
| Tbg972.10.19820 | <i>T. brucei</i> | 41  | 153  | 193  |
| Tbg972.10.19870 | <i>T. brucei</i> | 162 | 1    | 162  |
| Tbg972.10.1990  | <i>T. brucei</i> | 86  | 19   | 104  |
| Tbg972.10.19920 | <i>T. brucei</i> | 42  | 1211 | 1252 |
| Tbg972.10.20    | <i>T. brucei</i> | 101 | 1    | 101  |
| Tbg972.10.20    | <i>T. brucei</i> | 42  | 449  | 490  |
| Tbg972.10.20    | <i>T. brucei</i> | 72  | 563  | 634  |
| Tbg972.10.20    | <i>T. brucei</i> | 68  | 676  | 743  |
| Tbg972.10.2010  | <i>T. brucei</i> | 47  | 1    | 47   |
| Tbg972.10.2010  | <i>T. brucei</i> | 42  | 271  | 312  |
| Tbg972.10.2010  | <i>T. brucei</i> | 42  | 271  | 312  |
| Tbg972.10.2030  | <i>T. brucei</i> | 87  | 439  | 525  |
| Tbg972.10.2050  | <i>T. brucei</i> | 41  | 70   | 110  |
| Tbg972.10.2050  | <i>T. brucei</i> | 57  | 226  | 282  |
| Tbg972.10.2070  | <i>T. brucei</i> | 42  | 122  | 163  |
| Tbg972.10.2070  | <i>T. brucei</i> | 42  | 230  | 271  |
| Tbg972.10.2070  | <i>T. brucei</i> | 42  | 230  | 271  |
| Tbg972.10.2080  | <i>T. brucei</i> | 42  | 217  | 258  |
| Tbg972.10.2090  | <i>T. brucei</i> | 41  | 52   | 92   |

|                |                  |     |      |      |
|----------------|------------------|-----|------|------|
| Tbg972.10.2090 | <i>T. brucei</i> | 48  | 117  | 164  |
| Tbg972.10.2110 | <i>T. brucei</i> | 264 | 1    | 264  |
| Tbg972.10.2150 | <i>T. brucei</i> | 128 | 1    | 128  |
| Tbg972.10.2170 | <i>T. brucei</i> | 128 | 1    | 128  |
| Tbg972.10.220  | <i>T. brucei</i> | 153 | 66   | 218  |
| Tbg972.10.220  | <i>T. brucei</i> | 58  | 528  | 585  |
| Tbg972.10.2200 | <i>T. brucei</i> | 40  | 99   | 138  |
| Tbg972.10.2220 | <i>T. brucei</i> | 68  | 105  | 172  |
| Tbg972.10.2240 | <i>T. brucei</i> | 82  | 1    | 82   |
| Tbg972.10.2250 | <i>T. brucei</i> | 67  | 226  | 292  |
| Tbg972.10.2260 | <i>T. brucei</i> | 48  | 119  | 166  |
| Tbg972.10.2280 | <i>T. brucei</i> | 73  | 479  | 551  |
| Tbg972.10.2290 | <i>T. brucei</i> | 51  | 388  | 438  |
| Tbg972.10.2290 | <i>T. brucei</i> | 41  | 556  | 596  |
| Tbg972.10.2290 | <i>T. brucei</i> | 46  | 761  | 806  |
| Tbg972.10.230  | <i>T. brucei</i> | 71  | 53   | 123  |
| Tbg972.10.2310 | <i>T. brucei</i> | 69  | 13   | 81   |
| Tbg972.10.2310 | <i>T. brucei</i> | 69  | 111  | 179  |
| Tbg972.10.2310 | <i>T. brucei</i> | 185 | 1061 | 1245 |
| Tbg972.10.2320 | <i>T. brucei</i> | 90  | 1    | 90   |
| Tbg972.10.2320 | <i>T. brucei</i> | 86  | 562  | 647  |
| Tbg972.10.2320 | <i>T. brucei</i> | 86  | 562  | 647  |
| Tbg972.10.2340 | <i>T. brucei</i> | 71  | 460  | 530  |
| Tbg972.10.2350 | <i>T. brucei</i> | 51  | 1    | 51   |
| Tbg972.10.2360 | <i>T. brucei</i> | 287 | 174  | 460  |
| Tbg972.10.2360 | <i>T. brucei</i> | 41  | 1317 | 1357 |
| Tbg972.10.2370 | <i>T. brucei</i> | 41  | 86   | 126  |
| Tbg972.10.2380 | <i>T. brucei</i> | 52  | 669  | 720  |
| Tbg972.10.2390 | <i>T. brucei</i> | 44  | 515  | 558  |
| Tbg972.10.240  | <i>T. brucei</i> | 58  | 116  | 173  |
| Tbg972.10.2450 | <i>T. brucei</i> | 92  | 551  | 642  |
| Tbg972.10.2460 | <i>T. brucei</i> | 65  | 53   | 117  |
| Tbg972.10.2490 | <i>T. brucei</i> | 58  | 35   | 92   |
| Tbg972.10.2490 | <i>T. brucei</i> | 70  | 429  | 498  |
| Tbg972.10.2490 | <i>T. brucei</i> | 49  | 528  | 576  |
| Tbg972.10.2490 | <i>T. brucei</i> | 43  | 860  | 902  |
| Tbg972.10.2500 | <i>T. brucei</i> | 45  | 1    | 45   |
| Tbg972.10.2550 | <i>T. brucei</i> | 48  | 188  | 235  |
| Tbg972.10.2570 | <i>T. brucei</i> | 45  | 1    | 45   |
| Tbg972.10.2570 | <i>T. brucei</i> | 54  | 141  | 194  |
| Tbg972.10.2570 | <i>T. brucei</i> | 54  | 141  | 194  |
| Tbg972.10.2580 | <i>T. brucei</i> | 44  | 89   | 132  |
| Tbg972.10.2580 | <i>T. brucei</i> | 48  | 693  | 740  |
| Tbg972.10.2580 | <i>T. brucei</i> | 48  | 693  | 740  |
| Tbg972.10.2610 | <i>T. brucei</i> | 79  | 1    | 79   |
| Tbg972.10.2610 | <i>T. brucei</i> | 66  | 106  | 171  |
| Tbg972.10.2610 | <i>T. brucei</i> | 66  | 106  | 171  |

|                |                  |     |     |     |
|----------------|------------------|-----|-----|-----|
| Tbg972.10.2630 | <i>T. brucei</i> | 56  | 74  | 129 |
| Tbg972.10.2640 | <i>T. brucei</i> | 105 | 171 | 275 |
| Tbg972.10.2660 | <i>T. brucei</i> | 57  | 67  | 123 |
| Tbg972.10.2670 | <i>T. brucei</i> | 54  | 94  | 147 |
| Tbg972.10.2680 | <i>T. brucei</i> | 149 | 1   | 149 |
| Tbg972.10.2680 | <i>T. brucei</i> | 126 | 217 | 342 |
| Tbg972.10.2680 | <i>T. brucei</i> | 76  | 498 | 573 |
| Tbg972.10.2690 | <i>T. brucei</i> | 68  | 1   | 68  |
| Tbg972.10.2690 | <i>T. brucei</i> | 47  | 138 | 184 |
| Tbg972.10.2690 | <i>T. brucei</i> | 80  | 425 | 504 |
| Tbg972.10.2690 | <i>T. brucei</i> | 85  | 660 | 744 |
| Tbg972.10.270  | <i>T. brucei</i> | 51  | 1   | 51  |
| Tbg972.10.2700 | <i>T. brucei</i> | 41  | 1   | 41  |
| Tbg972.10.2700 | <i>T. brucei</i> | 55  | 263 | 317 |
| Tbg972.10.2700 | <i>T. brucei</i> | 55  | 263 | 317 |
| Tbg972.10.2710 | <i>T. brucei</i> | 387 | 160 | 546 |
| Tbg972.10.2740 | <i>T. brucei</i> | 50  | 238 | 287 |
| Tbg972.10.2740 | <i>T. brucei</i> | 46  | 607 | 652 |
| Tbg972.10.2740 | <i>T. brucei</i> | 86  | 699 | 784 |
| Tbg972.10.2750 | <i>T. brucei</i> | 40  | 626 | 665 |
| Tbg972.10.2750 | <i>T. brucei</i> | 71  | 863 | 933 |
| Tbg972.10.2750 | <i>T. brucei</i> | 71  | 863 | 933 |
| Tbg972.10.2770 | <i>T. brucei</i> | 226 | 21  | 246 |
| Tbg972.10.2770 | <i>T. brucei</i> | 54  | 306 | 359 |
| Tbg972.10.2780 | <i>T. brucei</i> | 55  | 55  | 109 |
| Tbg972.10.2780 | <i>T. brucei</i> | 55  | 362 | 416 |
| Tbg972.10.280  | <i>T. brucei</i> | 53  | 25  | 77  |
| Tbg972.10.2800 | <i>T. brucei</i> | 47  | 229 | 275 |
| Tbg972.10.2800 | <i>T. brucei</i> | 102 | 380 | 481 |
| Tbg972.10.2810 | <i>T. brucei</i> | 52  | 92  | 143 |
| Tbg972.10.2820 | <i>T. brucei</i> | 61  | 44  | 104 |
| Tbg972.10.2820 | <i>T. brucei</i> | 49  | 228 | 276 |
| Tbg972.10.2850 | <i>T. brucei</i> | 64  | 89  | 152 |
| Tbg972.10.2850 | <i>T. brucei</i> | 54  | 173 | 226 |
| Tbg972.10.2850 | <i>T. brucei</i> | 54  | 173 | 226 |
| Tbg972.10.2860 | <i>T. brucei</i> | 48  | 19  | 66  |
| Tbg972.10.2870 | <i>T. brucei</i> | 74  | 151 | 224 |
| Tbg972.10.2870 | <i>T. brucei</i> | 70  | 266 | 335 |
| Tbg972.10.2870 | <i>T. brucei</i> | 70  | 266 | 335 |
| Tbg972.10.2890 | <i>T. brucei</i> | 116 | 102 | 217 |
| Tbg972.10.2890 | <i>T. brucei</i> | 51  | 256 | 306 |
| Tbg972.10.2890 | <i>T. brucei</i> | 79  | 325 | 403 |
| Tbg972.10.2900 | <i>T. brucei</i> | 57  | 323 | 379 |
| Tbg972.10.2940 | <i>T. brucei</i> | 44  | 71  | 114 |
| Tbg972.10.2960 | <i>T. brucei</i> | 79  | 27  | 105 |
| Tbg972.10.3030 | <i>T. brucei</i> | 64  | 1   | 64  |
| Tbg972.10.3050 | <i>T. brucei</i> | 40  | 1   | 40  |

|                |                  |     |      |      |
|----------------|------------------|-----|------|------|
| Tbg972.10.3080 | <i>T. brucei</i> | 46  | 547  | 592  |
| Tbg972.10.3080 | <i>T. brucei</i> | 60  | 862  | 921  |
| Tbg972.10.3110 | <i>T. brucei</i> | 55  | 19   | 73   |
| Tbg972.10.3110 | <i>T. brucei</i> | 133 | 222  | 354  |
| Tbg972.10.3120 | <i>T. brucei</i> | 59  | 1    | 59   |
| Tbg972.10.320  | <i>T. brucei</i> | 102 | 48   | 149  |
| Tbg972.10.3210 | <i>T. brucei</i> | 114 | 1    | 114  |
| Tbg972.10.3210 | <i>T. brucei</i> | 87  | 208  | 294  |
| Tbg972.10.3210 | <i>T. brucei</i> | 87  | 208  | 294  |
| Tbg972.10.3220 | <i>T. brucei</i> | 56  | 1    | 56   |
| Tbg972.10.3220 | <i>T. brucei</i> | 84  | 346  | 429  |
| Tbg972.10.3220 | <i>T. brucei</i> | 42  | 740  | 781  |
| Tbg972.10.3230 | <i>T. brucei</i> | 46  | 227  | 272  |
| Tbg972.10.3230 | <i>T. brucei</i> | 44  | 458  | 501  |
| Tbg972.10.3230 | <i>T. brucei</i> | 44  | 458  | 501  |
| Tbg972.10.3260 | <i>T. brucei</i> | 129 | 64   | 192  |
| Tbg972.10.3270 | <i>T. brucei</i> | 63  | 1    | 63   |
| Tbg972.10.3290 | <i>T. brucei</i> | 41  | 1    | 41   |
| Tbg972.10.3290 | <i>T. brucei</i> | 215 | 242  | 456  |
| Tbg972.10.3290 | <i>T. brucei</i> | 43  | 558  | 600  |
| Tbg972.10.330  | <i>T. brucei</i> | 46  | 76   | 121  |
| Tbg972.10.3300 | <i>T. brucei</i> | 62  | 108  | 169  |
| Tbg972.10.3300 | <i>T. brucei</i> | 162 | 254  | 415  |
| Tbg972.10.3300 | <i>T. brucei</i> | 48  | 421  | 468  |
| Tbg972.10.3300 | <i>T. brucei</i> | 92  | 504  | 595  |
| Tbg972.10.3300 | <i>T. brucei</i> | 70  | 630  | 699  |
| Tbg972.10.3300 | <i>T. brucei</i> | 275 | 901  | 1175 |
| Tbg972.10.3310 | <i>T. brucei</i> | 188 | 1    | 188  |
| Tbg972.10.3350 | <i>T. brucei</i> | 48  | 1    | 48   |
| Tbg972.10.3350 | <i>T. brucei</i> | 53  | 64   | 116  |
| Tbg972.10.3350 | <i>T. brucei</i> | 40  | 472  | 511  |
| Tbg972.10.3360 | <i>T. brucei</i> | 123 | 1    | 123  |
| Tbg972.10.3360 | <i>T. brucei</i> | 144 | 553  | 696  |
| Tbg972.10.3380 | <i>T. brucei</i> | 94  | 188  | 281  |
| Tbg972.10.3380 | <i>T. brucei</i> | 72  | 357  | 428  |
| Tbg972.10.3380 | <i>T. brucei</i> | 72  | 357  | 428  |
| Tbg972.10.340  | <i>T. brucei</i> | 64  | 47   | 110  |
| Tbg972.10.3430 | <i>T. brucei</i> | 50  | 168  | 217  |
| Tbg972.10.3440 | <i>T. brucei</i> | 58  | 223  | 280  |
| Tbg972.10.3440 | <i>T. brucei</i> | 108 | 491  | 598  |
| Tbg972.10.3450 | <i>T. brucei</i> | 59  | 153  | 211  |
| Tbg972.10.3460 | <i>T. brucei</i> | 51  | 325  | 375  |
| Tbg972.10.3460 | <i>T. brucei</i> | 42  | 983  | 1024 |
| Tbg972.10.3460 | <i>T. brucei</i> | 61  | 1054 | 1114 |
| Tbg972.10.3490 | <i>T. brucei</i> | 48  | 230  | 277  |
| Tbg972.10.3490 | <i>T. brucei</i> | 71  | 307  | 377  |
| Tbg972.10.3490 | <i>T. brucei</i> | 56  | 502  | 557  |



|                |                  |     |      |      |
|----------------|------------------|-----|------|------|
| Tbg972.10.3490 | <i>T. brucei</i> | 40  | 818  | 857  |
| Tbg972.10.3510 | <i>T. brucei</i> | 40  | 245  | 284  |
| Tbg972.10.3540 | <i>T. brucei</i> | 57  | 1    | 57   |
| Tbg972.10.3550 | <i>T. brucei</i> | 77  | 1    | 77   |
| Tbg972.10.3550 | <i>T. brucei</i> | 106 | 112  | 217  |
| Tbg972.10.3550 | <i>T. brucei</i> | 75  | 247  | 321  |
| Tbg972.10.3560 | <i>T. brucei</i> | 78  | 1    | 78   |
| Tbg972.10.3560 | <i>T. brucei</i> | 47  | 241  | 287  |
| Tbg972.10.3560 | <i>T. brucei</i> | 136 | 417  | 552  |
| Tbg972.10.3580 | <i>T. brucei</i> | 43  | 128  | 170  |
| Tbg972.10.3580 | <i>T. brucei</i> | 57  | 229  | 285  |
| Tbg972.10.3580 | <i>T. brucei</i> | 96  | 459  | 554  |
| Tbg972.10.3580 | <i>T. brucei</i> | 77  | 615  | 691  |
| Tbg972.10.3580 | <i>T. brucei</i> | 101 | 700  | 800  |
| Tbg972.10.3590 | <i>T. brucei</i> | 189 | 1    | 189  |
| Tbg972.10.3590 | <i>T. brucei</i> | 41  | 233  | 273  |
| Tbg972.10.3590 | <i>T. brucei</i> | 134 | 627  | 760  |
| Tbg972.10.3590 | <i>T. brucei</i> | 102 | 814  | 915  |
| Tbg972.10.3590 | <i>T. brucei</i> | 50  | 1335 | 1384 |
| Tbg972.10.3590 | <i>T. brucei</i> | 131 | 1436 | 1566 |
| Tbg972.10.3590 | <i>T. brucei</i> | 180 | 2514 | 2693 |
| Tbg972.10.3630 | <i>T. brucei</i> | 286 | 100  | 385  |
| Tbg972.10.3640 | <i>T. brucei</i> | 61  | 1    | 61   |
| Tbg972.10.3640 | <i>T. brucei</i> | 47  | 173  | 219  |
| Tbg972.10.3640 | <i>T. brucei</i> | 115 | 225  | 339  |
| Tbg972.10.3640 | <i>T. brucei</i> | 95  | 355  | 449  |
| Tbg972.10.3640 | <i>T. brucei</i> | 285 | 493  | 777  |
| Tbg972.10.3640 | <i>T. brucei</i> | 61  | 796  | 856  |
| Tbg972.10.3640 | <i>T. brucei</i> | 163 | 884  | 1046 |
| Tbg972.10.3660 | <i>T. brucei</i> | 206 | 1    | 206  |
| Tbg972.10.3660 | <i>T. brucei</i> | 349 | 227  | 575  |
| Tbg972.10.3660 | <i>T. brucei</i> | 166 | 584  | 749  |
| Tbg972.10.3670 | <i>T. brucei</i> | 48  | 88   | 135  |
| Tbg972.10.3690 | <i>T. brucei</i> | 144 | 183  | 326  |
| Tbg972.10.3690 | <i>T. brucei</i> | 59  | 382  | 440  |
| Tbg972.10.3690 | <i>T. brucei</i> | 52  | 494  | 545  |
| Tbg972.10.3690 | <i>T. brucei</i> | 85  | 1138 | 1222 |
| Tbg972.10.3690 | <i>T. brucei</i> | 51  | 1422 | 1472 |
| Tbg972.10.3690 | <i>T. brucei</i> | 56  | 1757 | 1812 |
| Tbg972.10.3700 | <i>T. brucei</i> | 85  | 21   | 105  |
| Tbg972.10.3710 | <i>T. brucei</i> | 93  | 23   | 115  |
| Tbg972.10.3750 | <i>T. brucei</i> | 175 | 228  | 402  |
| Tbg972.10.3750 | <i>T. brucei</i> | 48  | 424  | 471  |
| Tbg972.10.3750 | <i>T. brucei</i> | 267 | 490  | 756  |
| Tbg972.10.3760 | <i>T. brucei</i> | 90  | 1    | 90   |
| Tbg972.10.3760 | <i>T. brucei</i> | 278 | 98   | 375  |
| Tbg972.10.3760 | <i>T. brucei</i> | 44  | 411  | 454  |

|                |                  |     |      |      |
|----------------|------------------|-----|------|------|
| Tbg972.10.3760 | <i>T. brucei</i> | 74  | 457  | 530  |
| Tbg972.10.3760 | <i>T. brucei</i> | 66  | 599  | 664  |
| Tbg972.10.3760 | <i>T. brucei</i> | 277 | 738  | 1014 |
| Tbg972.10.3760 | <i>T. brucei</i> | 191 | 1033 | 1223 |
| Tbg972.10.3770 | <i>T. brucei</i> | 179 | 113  | 291  |
| Tbg972.10.3770 | <i>T. brucei</i> | 63  | 485  | 547  |
| Tbg972.10.3770 | <i>T. brucei</i> | 63  | 584  | 646  |
| Tbg972.10.380  | <i>T. brucei</i> | 80  | 1    | 80   |
| Tbg972.10.3810 | <i>T. brucei</i> | 67  | 39   | 105  |
| Tbg972.10.3830 | <i>T. brucei</i> | 79  | 40   | 118  |
| Tbg972.10.3830 | <i>T. brucei</i> | 41  | 120  | 160  |
| Tbg972.10.3890 | <i>T. brucei</i> | 45  | 127  | 171  |
| Tbg972.10.390  | <i>T. brucei</i> | 520 | 83   | 602  |
| Tbg972.10.3920 | <i>T. brucei</i> | 41  | 658  | 698  |
| Tbg972.10.3930 | <i>T. brucei</i> | 155 | 1    | 155  |
| Tbg972.10.3940 | <i>T. brucei</i> | 48  | 85   | 132  |
| Tbg972.10.3940 | <i>T. brucei</i> | 53  | 525  | 577  |
| Tbg972.10.3940 | <i>T. brucei</i> | 53  | 525  | 577  |
| Tbg972.10.3960 | <i>T. brucei</i> | 123 | 151  | 273  |
| Tbg972.10.3960 | <i>T. brucei</i> | 40  | 354  | 393  |
| Tbg972.10.3960 | <i>T. brucei</i> | 70  | 477  | 546  |
| Tbg972.10.3960 | <i>T. brucei</i> | 53  | 604  | 656  |
| Tbg972.10.3960 | <i>T. brucei</i> | 122 | 663  | 784  |
| Tbg972.10.3970 | <i>T. brucei</i> | 46  | 212  | 257  |
| Tbg972.10.3970 | <i>T. brucei</i> | 172 | 271  | 442  |
| Tbg972.10.3970 | <i>T. brucei</i> | 43  | 452  | 494  |
| Tbg972.10.3970 | <i>T. brucei</i> | 80  | 551  | 630  |
| Tbg972.10.3990 | <i>T. brucei</i> | 40  | 1    | 40   |
| Tbg972.10.3990 | <i>T. brucei</i> | 85  | 46   | 130  |
| Tbg972.10.3990 | <i>T. brucei</i> | 85  | 46   | 130  |
| Tbg972.10.4010 | <i>T. brucei</i> | 40  | 139  | 178  |
| Tbg972.10.4010 | <i>T. brucei</i> | 41  | 439  | 479  |
| Tbg972.10.4010 | <i>T. brucei</i> | 41  | 439  | 479  |
| Tbg972.10.4020 | <i>T. brucei</i> | 86  | 37   | 122  |
| Tbg972.10.4040 | <i>T. brucei</i> | 89  | 159  | 247  |
| Tbg972.10.4070 | <i>T. brucei</i> | 148 | 1    | 148  |
| Tbg972.10.410  | <i>T. brucei</i> | 43  | 220  | 262  |
| Tbg972.10.410  | <i>T. brucei</i> | 400 | 266  | 665  |
| Tbg972.10.4100 | <i>T. brucei</i> | 44  | 39   | 82   |
| Tbg972.10.4100 | <i>T. brucei</i> | 45  | 228  | 272  |
| Tbg972.10.4100 | <i>T. brucei</i> | 45  | 228  | 272  |
| Tbg972.10.4130 | <i>T. brucei</i> | 61  | 1    | 61   |
| Tbg972.10.4170 | <i>T. brucei</i> | 85  | 1    | 85   |
| Tbg972.10.4180 | <i>T. brucei</i> | 45  | 37   | 81   |
| Tbg972.10.4180 | <i>T. brucei</i> | 47  | 93   | 139  |
| Tbg972.10.4180 | <i>T. brucei</i> | 376 | 163  | 538  |
| Tbg972.10.4180 | <i>T. brucei</i> | 69  | 649  | 717  |

|                |                  |     |      |      |
|----------------|------------------|-----|------|------|
| Tbg972.10.4180 | <i>T. brucei</i> | 65  | 869  | 933  |
| Tbg972.10.4190 | <i>T. brucei</i> | 75  | 177  | 251  |
| Tbg972.10.4200 | <i>T. brucei</i> | 193 | 31   | 223  |
| Tbg972.10.4210 | <i>T. brucei</i> | 206 | 1    | 206  |
| Tbg972.10.4210 | <i>T. brucei</i> | 43  | 316  | 358  |
| Tbg972.10.4210 | <i>T. brucei</i> | 51  | 410  | 460  |
| Tbg972.10.4210 | <i>T. brucei</i> | 63  | 821  | 883  |
| Tbg972.10.4220 | <i>T. brucei</i> | 42  | 1    | 42   |
| Tbg972.10.4220 | <i>T. brucei</i> | 57  | 240  | 296  |
| Tbg972.10.4220 | <i>T. brucei</i> | 57  | 240  | 296  |
| Tbg972.10.4230 | <i>T. brucei</i> | 80  | 11   | 90   |
| Tbg972.10.4230 | <i>T. brucei</i> | 104 | 121  | 224  |
| Tbg972.10.4230 | <i>T. brucei</i> | 42  | 580  | 621  |
| Tbg972.10.4230 | <i>T. brucei</i> | 91  | 709  | 799  |
| Tbg972.10.4230 | <i>T. brucei</i> | 45  | 896  | 940  |
| Tbg972.10.4240 | <i>T. brucei</i> | 54  | 136  | 189  |
| Tbg972.10.4250 | <i>T. brucei</i> | 54  | 87   | 140  |
| Tbg972.10.4260 | <i>T. brucei</i> | 47  | 712  | 758  |
| Tbg972.10.4260 | <i>T. brucei</i> | 124 | 930  | 1053 |
| Tbg972.10.4260 | <i>T. brucei</i> | 48  | 1217 | 1264 |
| Tbg972.10.4280 | <i>T. brucei</i> | 119 | 82   | 200  |
| Tbg972.10.4280 | <i>T. brucei</i> | 150 | 304  | 453  |
| Tbg972.10.4290 | <i>T. brucei</i> | 59  | 140  | 198  |
| Tbg972.10.4340 | <i>T. brucei</i> | 72  | 1    | 72   |
| Tbg972.10.4340 | <i>T. brucei</i> | 116 | 98   | 213  |
| Tbg972.10.4340 | <i>T. brucei</i> | 80  | 310  | 389  |
| Tbg972.10.4350 | <i>T. brucei</i> | 49  | 41   | 89   |
| Tbg972.10.4350 | <i>T. brucei</i> | 61  | 92   | 152  |
| Tbg972.10.4350 | <i>T. brucei</i> | 52  | 540  | 591  |
| Tbg972.10.4360 | <i>T. brucei</i> | 159 | 1    | 159  |
| Tbg972.10.4360 | <i>T. brucei</i> | 58  | 229  | 286  |
| Tbg972.10.4360 | <i>T. brucei</i> | 137 | 608  | 744  |
| Tbg972.10.4360 | <i>T. brucei</i> | 80  | 796  | 875  |
| Tbg972.10.4370 | <i>T. brucei</i> | 149 | 25   | 173  |
| Tbg972.10.4370 | <i>T. brucei</i> | 82  | 974  | 1055 |
| Tbg972.10.4370 | <i>T. brucei</i> | 49  | 1367 | 1415 |
| Tbg972.10.4370 | <i>T. brucei</i> | 45  | 1422 | 1466 |
| Tbg972.10.4370 | <i>T. brucei</i> | 52  | 1673 | 1724 |
| Tbg972.10.4380 | <i>T. brucei</i> | 49  | 1    | 49   |
| Tbg972.10.440  | <i>T. brucei</i> | 89  | 1    | 89   |
| Tbg972.10.440  | <i>T. brucei</i> | 115 | 174  | 288  |
| Tbg972.10.440  | <i>T. brucei</i> | 109 | 304  | 412  |
| Tbg972.10.4400 | <i>T. brucei</i> | 109 | 1    | 109  |
| Tbg972.10.4410 | <i>T. brucei</i> | 45  | 11   | 55   |
| Tbg972.10.4410 | <i>T. brucei</i> | 107 | 120  | 226  |
| Tbg972.10.4410 | <i>T. brucei</i> | 107 | 120  | 226  |
| Tbg972.10.4420 | <i>T. brucei</i> | 141 | 67   | 207  |

|                |                  |     |      |      |
|----------------|------------------|-----|------|------|
| Tbg972.10.4420 | <i>T. brucei</i> | 66  | 268  | 333  |
| Tbg972.10.4420 | <i>T. brucei</i> | 42  | 399  | 440  |
| Tbg972.10.4420 | <i>T. brucei</i> | 40  | 717  | 756  |
| Tbg972.10.4430 | <i>T. brucei</i> | 65  | 1    | 65   |
| Tbg972.10.4450 | <i>T. brucei</i> | 74  | 67   | 140  |
| Tbg972.10.4450 | <i>T. brucei</i> | 62  | 174  | 235  |
| Tbg972.10.4460 | <i>T. brucei</i> | 46  | 121  | 166  |
| Tbg972.10.4470 | <i>T. brucei</i> | 82  | 18   | 99   |
| Tbg972.10.4510 | <i>T. brucei</i> | 82  | 61   | 142  |
| Tbg972.10.4540 | <i>T. brucei</i> | 43  | 1    | 43   |
| Tbg972.10.4540 | <i>T. brucei</i> | 61  | 45   | 105  |
| Tbg972.10.4540 | <i>T. brucei</i> | 61  | 45   | 105  |
| Tbg972.10.4570 | <i>T. brucei</i> | 156 | 1    | 156  |
| Tbg972.10.4570 | <i>T. brucei</i> | 94  | 169  | 262  |
| Tbg972.10.4580 | <i>T. brucei</i> | 151 | 1    | 151  |
| Tbg972.10.4580 | <i>T. brucei</i> | 57  | 191  | 247  |
| Tbg972.10.4590 | <i>T. brucei</i> | 51  | 1    | 51   |
| Tbg972.10.4590 | <i>T. brucei</i> | 43  | 170  | 212  |
| Tbg972.10.4590 | <i>T. brucei</i> | 43  | 170  | 212  |
| Tbg972.10.4600 | <i>T. brucei</i> | 42  | 9    | 50   |
| Tbg972.10.4600 | <i>T. brucei</i> | 41  | 250  | 290  |
| Tbg972.10.4600 | <i>T. brucei</i> | 41  | 250  | 290  |
| Tbg972.10.4620 | <i>T. brucei</i> | 122 | 239  | 360  |
| Tbg972.10.4620 | <i>T. brucei</i> | 53  | 456  | 508  |
| Tbg972.10.4630 | <i>T. brucei</i> | 102 | 23   | 124  |
| Tbg972.10.4630 | <i>T. brucei</i> | 69  | 136  | 204  |
| Tbg972.10.4630 | <i>T. brucei</i> | 44  | 470  | 513  |
| Tbg972.10.4630 | <i>T. brucei</i> | 72  | 601  | 672  |
| Tbg972.10.4640 | <i>T. brucei</i> | 51  | 283  | 333  |
| Tbg972.10.4650 | <i>T. brucei</i> | 90  | 1    | 90   |
| Tbg972.10.4680 | <i>T. brucei</i> | 60  | 108  | 167  |
| Tbg972.10.4680 | <i>T. brucei</i> | 66  | 218  | 283  |
| Tbg972.10.4690 | <i>T. brucei</i> | 47  | 301  | 347  |
| Tbg972.10.4710 | <i>T. brucei</i> | 51  | 1    | 51   |
| Tbg972.10.4710 | <i>T. brucei</i> | 216 | 89   | 304  |
| Tbg972.10.4710 | <i>T. brucei</i> | 195 | 360  | 554  |
| Tbg972.10.4710 | <i>T. brucei</i> | 396 | 587  | 982  |
| Tbg972.10.4720 | <i>T. brucei</i> | 45  | 249  | 293  |
| Tbg972.10.4720 | <i>T. brucei</i> | 92  | 692  | 783  |
| Tbg972.10.4720 | <i>T. brucei</i> | 46  | 2375 | 2420 |
| Tbg972.10.4720 | <i>T. brucei</i> | 75  | 2596 | 2670 |
| Tbg972.10.4720 | <i>T. brucei</i> | 41  | 2836 | 2876 |
| Tbg972.10.4720 | <i>T. brucei</i> | 113 | 2966 | 3078 |
| Tbg972.10.4720 | <i>T. brucei</i> | 40  | 3525 | 3564 |
| Tbg972.10.4720 | <i>T. brucei</i> | 50  | 3792 | 3841 |
| Tbg972.10.4720 | <i>T. brucei</i> | 47  | 3855 | 3901 |
| Tbg972.10.4730 | <i>T. brucei</i> | 67  | 70   | 136  |

|                |                  |     |      |      |
|----------------|------------------|-----|------|------|
| Tbg972.10.4730 | <i>T. brucei</i> | 474 | 170  | 643  |
| Tbg972.10.4730 | <i>T. brucei</i> | 46  | 655  | 700  |
| Tbg972.10.4740 | <i>T. brucei</i> | 75  | 1    | 75   |
| Tbg972.10.4740 | <i>T. brucei</i> | 165 | 209  | 373  |
| Tbg972.10.4750 | <i>T. brucei</i> | 60  | 87   | 146  |
| Tbg972.10.4750 | <i>T. brucei</i> | 53  | 197  | 249  |
| Tbg972.10.4750 | <i>T. brucei</i> | 58  | 293  | 350  |
| Tbg972.10.4750 | <i>T. brucei</i> | 43  | 434  | 476  |
| Tbg972.10.4750 | <i>T. brucei</i> | 42  | 517  | 558  |
| Tbg972.10.4750 | <i>T. brucei</i> | 93  | 575  | 667  |
| Tbg972.10.4750 | <i>T. brucei</i> | 49  | 1058 | 1106 |
| Tbg972.10.4750 | <i>T. brucei</i> | 91  | 1136 | 1226 |
| Tbg972.10.4750 | <i>T. brucei</i> | 71  | 1533 | 1603 |
| Tbg972.10.4750 | <i>T. brucei</i> | 99  | 1743 | 1841 |
| Tbg972.10.4770 | <i>T. brucei</i> | 223 | 39   | 261  |
| Tbg972.10.4780 | <i>T. brucei</i> | 53  | 59   | 111  |
| Tbg972.10.4790 | <i>T. brucei</i> | 131 | 1    | 131  |
| Tbg972.10.4790 | <i>T. brucei</i> | 76  | 145  | 220  |
| Tbg972.10.4810 | <i>T. brucei</i> | 73  | 544  | 616  |
| Tbg972.10.4810 | <i>T. brucei</i> | 96  | 1146 | 1241 |
| Tbg972.10.4810 | <i>T. brucei</i> | 44  | 1276 | 1319 |
| Tbg972.10.4810 | <i>T. brucei</i> | 55  | 1807 | 1861 |
| Tbg972.10.4810 | <i>T. brucei</i> | 150 | 1896 | 2045 |
| Tbg972.10.4810 | <i>T. brucei</i> | 66  | 2086 | 2151 |
| Tbg972.10.4820 | <i>T. brucei</i> | 59  | 19   | 77   |
| Tbg972.10.4820 | <i>T. brucei</i> | 57  | 220  | 276  |
| Tbg972.10.4820 | <i>T. brucei</i> | 57  | 220  | 276  |
| Tbg972.10.4830 | <i>T. brucei</i> | 57  | 77   | 133  |
| Tbg972.10.4830 | <i>T. brucei</i> | 49  | 148  | 196  |
| Tbg972.10.4830 | <i>T. brucei</i> | 78  | 280  | 357  |
| Tbg972.10.4830 | <i>T. brucei</i> | 52  | 398  | 449  |
| Tbg972.10.4830 | <i>T. brucei</i> | 40  | 543  | 582  |
| Tbg972.10.4850 | <i>T. brucei</i> | 62  | 614  | 675  |
| Tbg972.10.4870 | <i>T. brucei</i> | 57  | 99   | 155  |
| Tbg972.10.4880 | <i>T. brucei</i> | 70  | 38   | 107  |
| Tbg972.10.4880 | <i>T. brucei</i> | 172 | 133  | 304  |
| Tbg972.10.4880 | <i>T. brucei</i> | 172 | 133  | 304  |
| Tbg972.10.4910 | <i>T. brucei</i> | 97  | 1    | 97   |
| Tbg972.10.4920 | <i>T. brucei</i> | 85  | 1    | 85   |
| Tbg972.10.4940 | <i>T. brucei</i> | 133 | 1    | 133  |
| Tbg972.10.4940 | <i>T. brucei</i> | 40  | 253  | 292  |
| Tbg972.10.4940 | <i>T. brucei</i> | 40  | 253  | 292  |
| Tbg972.10.4950 | <i>T. brucei</i> | 86  | 40   | 125  |
| Tbg972.10.4980 | <i>T. brucei</i> | 60  | 1    | 60   |
| Tbg972.10.50   | <i>T. brucei</i> | 61  | 71   | 131  |
| Tbg972.10.500  | <i>T. brucei</i> | 48  | 389  | 436  |
| Tbg972.10.5000 | <i>T. brucei</i> | 53  | 225  | 277  |

|                |                  |     |      |      |
|----------------|------------------|-----|------|------|
| Tbg972.10.5010 | <i>T. brucei</i> | 47  | 124  | 170  |
| Tbg972.10.5010 | <i>T. brucei</i> | 58  | 435  | 492  |
| Tbg972.10.5010 | <i>T. brucei</i> | 58  | 435  | 492  |
| Tbg972.10.5020 | <i>T. brucei</i> | 41  | 143  | 183  |
| Tbg972.10.5020 | <i>T. brucei</i> | 54  | 325  | 378  |
| Tbg972.10.5020 | <i>T. brucei</i> | 54  | 325  | 378  |
| Tbg972.10.5050 | <i>T. brucei</i> | 51  | 27   | 77   |
| Tbg972.10.5070 | <i>T. brucei</i> | 56  | 25   | 80   |
| Tbg972.10.5070 | <i>T. brucei</i> | 126 | 152  | 277  |
| Tbg972.10.5080 | <i>T. brucei</i> | 687 | 24   | 710  |
| Tbg972.10.5080 | <i>T. brucei</i> | 54  | 783  | 836  |
| Tbg972.10.510  | <i>T. brucei</i> | 142 | 298  | 439  |
| Tbg972.10.5100 | <i>T. brucei</i> | 79  | 330  | 408  |
| Tbg972.10.5100 | <i>T. brucei</i> | 63  | 505  | 567  |
| Tbg972.10.5100 | <i>T. brucei</i> | 72  | 620  | 691  |
| Tbg972.10.5140 | <i>T. brucei</i> | 108 | 158  | 265  |
| Tbg972.10.5170 | <i>T. brucei</i> | 95  | 34   | 128  |
| Tbg972.10.5170 | <i>T. brucei</i> | 182 | 153  | 334  |
| Tbg972.10.5180 | <i>T. brucei</i> | 344 | 142  | 485  |
| Tbg972.10.5180 | <i>T. brucei</i> | 66  | 579  | 644  |
| Tbg972.10.5180 | <i>T. brucei</i> | 66  | 646  | 711  |
| Tbg972.10.5180 | <i>T. brucei</i> | 201 | 729  | 929  |
| Tbg972.10.5180 | <i>T. brucei</i> | 58  | 1094 | 1151 |
| Tbg972.10.5180 | <i>T. brucei</i> | 43  | 1306 | 1348 |
| Tbg972.10.5180 | <i>T. brucei</i> | 132 | 1475 | 1606 |
| Tbg972.10.5180 | <i>T. brucei</i> | 67  | 1648 | 1714 |
| Tbg972.10.5180 | <i>T. brucei</i> | 286 | 1765 | 2050 |
| Tbg972.10.5180 | <i>T. brucei</i> | 221 | 2060 | 2280 |
| Tbg972.10.5180 | <i>T. brucei</i> | 147 | 2393 | 2539 |
| Tbg972.10.520  | <i>T. brucei</i> | 42  | 86   | 127  |
| Tbg972.10.5200 | <i>T. brucei</i> | 40  | 1    | 40   |
| Tbg972.10.5210 | <i>T. brucei</i> | 44  | 1    | 44   |
| Tbg972.10.5220 | <i>T. brucei</i> | 211 | 1    | 211  |
| Tbg972.10.5220 | <i>T. brucei</i> | 105 | 251  | 355  |
| Tbg972.10.5220 | <i>T. brucei</i> | 46  | 365  | 410  |
| Tbg972.10.5220 | <i>T. brucei</i> | 58  | 477  | 534  |
| Tbg972.10.5220 | <i>T. brucei</i> | 150 | 550  | 699  |
| Tbg972.10.5220 | <i>T. brucei</i> | 65  | 715  | 779  |
| Tbg972.10.5230 | <i>T. brucei</i> | 72  | 42   | 113  |
| Tbg972.10.5230 | <i>T. brucei</i> | 40  | 288  | 327  |
| Tbg972.10.5230 | <i>T. brucei</i> | 40  | 288  | 327  |
| Tbg972.10.5320 | <i>T. brucei</i> | 95  | 122  | 216  |
| Tbg972.10.5350 | <i>T. brucei</i> | 40  | 202  | 241  |
| Tbg972.10.5370 | <i>T. brucei</i> | 446 | 179  | 624  |
| Tbg972.10.5400 | <i>T. brucei</i> | 95  | 1    | 95   |
| Tbg972.10.5400 | <i>T. brucei</i> | 42  | 164  | 205  |
| Tbg972.10.5410 | <i>T. brucei</i> | 95  | 26   | 120  |

|                |                  |     |      |      |
|----------------|------------------|-----|------|------|
| Tbg972.10.5430 | <i>T. brucei</i> | 133 | 96   | 228  |
| Tbg972.10.5460 | <i>T. brucei</i> | 51  | 1    | 51   |
| Tbg972.10.5460 | <i>T. brucei</i> | 50  | 423  | 472  |
| Tbg972.10.5460 | <i>T. brucei</i> | 48  | 512  | 559  |
| Tbg972.10.5470 | <i>T. brucei</i> | 69  | 1    | 69   |
| Tbg972.10.5470 | <i>T. brucei</i> | 64  | 99   | 162  |
| Tbg972.10.5470 | <i>T. brucei</i> | 98  | 190  | 287  |
| Tbg972.10.5480 | <i>T. brucei</i> | 50  | 90   | 139  |
| Tbg972.10.550  | <i>T. brucei</i> | 221 | 1    | 221  |
| Tbg972.10.550  | <i>T. brucei</i> | 51  | 326  | 376  |
| Tbg972.10.550  | <i>T. brucei</i> | 68  | 671  | 738  |
| Tbg972.10.550  | <i>T. brucei</i> | 62  | 825  | 886  |
| Tbg972.10.550  | <i>T. brucei</i> | 45  | 1206 | 1250 |
| Tbg972.10.550  | <i>T. brucei</i> | 145 | 1541 | 1685 |
| Tbg972.10.5510 | <i>T. brucei</i> | 54  | 483  | 536  |
| Tbg972.10.5520 | <i>T. brucei</i> | 58  | 235  | 292  |
| Tbg972.10.5520 | <i>T. brucei</i> | 48  | 771  | 818  |
| Tbg972.10.5520 | <i>T. brucei</i> | 48  | 771  | 818  |
| Tbg972.10.5540 | <i>T. brucei</i> | 41  | 57   | 97   |
| Tbg972.10.5540 | <i>T. brucei</i> | 174 | 141  | 314  |
| Tbg972.10.5560 | <i>T. brucei</i> | 43  | 245  | 287  |
| Tbg972.10.5580 | <i>T. brucei</i> | 47  | 110  | 156  |
| Tbg972.10.560  | <i>T. brucei</i> | 96  | 104  | 199  |
| Tbg972.10.5650 | <i>T. brucei</i> | 58  | 1    | 58   |
| Tbg972.10.5650 | <i>T. brucei</i> | 94  | 120  | 213  |
| Tbg972.10.5650 | <i>T. brucei</i> | 94  | 120  | 213  |
| Tbg972.10.5670 | <i>T. brucei</i> | 52  | 1    | 52   |
| Tbg972.10.5670 | <i>T. brucei</i> | 42  | 54   | 95   |
| Tbg972.10.5670 | <i>T. brucei</i> | 117 | 117  | 233  |
| Tbg972.10.5670 | <i>T. brucei</i> | 93  | 526  | 618  |
| Tbg972.10.5680 | <i>T. brucei</i> | 55  | 67   | 121  |
| Tbg972.10.5680 | <i>T. brucei</i> | 59  | 130  | 188  |
| Tbg972.10.5680 | <i>T. brucei</i> | 59  | 130  | 188  |
| Tbg972.10.570  | <i>T. brucei</i> | 77  | 360  | 436  |
| Tbg972.10.570  | <i>T. brucei</i> | 41  | 673  | 713  |
| Tbg972.10.5700 | <i>T. brucei</i> | 42  | 89   | 130  |
| Tbg972.10.5740 | <i>T. brucei</i> | 68  | 34   | 101  |
| Tbg972.10.5740 | <i>T. brucei</i> | 40  | 153  | 192  |
| Tbg972.10.5740 | <i>T. brucei</i> | 40  | 153  | 192  |
| Tbg972.10.5750 | <i>T. brucei</i> | 50  | 71   | 120  |
| Tbg972.10.5780 | <i>T. brucei</i> | 42  | 172  | 213  |
| Tbg972.10.5790 | <i>T. brucei</i> | 52  | 61   | 112  |
| Tbg972.10.580  | <i>T. brucei</i> | 68  | 464  | 531  |
| Tbg972.10.5810 | <i>T. brucei</i> | 66  | 1    | 66   |
| Tbg972.10.5810 | <i>T. brucei</i> | 68  | 215  | 282  |
| Tbg972.10.5810 | <i>T. brucei</i> | 40  | 328  | 367  |
| Tbg972.10.5820 | <i>T. brucei</i> | 69  | 162  | 230  |

|                |                  |     |     |     |
|----------------|------------------|-----|-----|-----|
| Tbg972.10.5830 | <i>T. brucei</i> | 56  | 36  | 91  |
| Tbg972.10.5840 | <i>T. brucei</i> | 59  | 91  | 149 |
| Tbg972.10.5840 | <i>T. brucei</i> | 80  | 329 | 408 |
| Tbg972.10.5840 | <i>T. brucei</i> | 67  | 553 | 619 |
| Tbg972.10.5860 | <i>T. brucei</i> | 41  | 57  | 97  |
| Tbg972.10.5870 | <i>T. brucei</i> | 59  | 110 | 168 |
| Tbg972.10.5870 | <i>T. brucei</i> | 53  | 247 | 299 |
| Tbg972.10.5870 | <i>T. brucei</i> | 53  | 247 | 299 |
| Tbg972.10.5880 | <i>T. brucei</i> | 44  | 1   | 44  |
| Tbg972.10.5890 | <i>T. brucei</i> | 47  | 53  | 99  |
| Tbg972.10.590  | <i>T. brucei</i> | 62  | 1   | 62  |
| Tbg972.10.590  | <i>T. brucei</i> | 200 | 125 | 324 |
| Tbg972.10.5910 | <i>T. brucei</i> | 322 | 60  | 381 |
| Tbg972.10.5920 | <i>T. brucei</i> | 62  | 374 | 435 |
| Tbg972.10.5930 | <i>T. brucei</i> | 53  | 1   | 53  |
| Tbg972.10.5940 | <i>T. brucei</i> | 57  | 39  | 95  |
| Tbg972.10.5940 | <i>T. brucei</i> | 178 | 123 | 300 |
| Tbg972.10.5950 | <i>T. brucei</i> | 63  | 328 | 390 |
| Tbg972.10.5950 | <i>T. brucei</i> | 97  | 403 | 499 |
| Tbg972.10.5950 | <i>T. brucei</i> | 97  | 403 | 499 |
| Tbg972.10.5970 | <i>T. brucei</i> | 95  | 23  | 117 |
| Tbg972.10.5970 | <i>T. brucei</i> | 67  | 284 | 350 |
| Tbg972.10.5990 | <i>T. brucei</i> | 40  | 239 | 278 |
| Tbg972.10.60   | <i>T. brucei</i> | 125 | 36  | 160 |
| Tbg972.10.60   | <i>T. brucei</i> | 43  | 167 | 209 |
| Tbg972.10.60   | <i>T. brucei</i> | 43  | 167 | 209 |
| Tbg972.10.600  | <i>T. brucei</i> | 52  | 46  | 97  |
| Tbg972.10.6000 | <i>T. brucei</i> | 43  | 89  | 131 |
| Tbg972.10.6030 | <i>T. brucei</i> | 212 | 67  | 278 |
| Tbg972.10.6050 | <i>T. brucei</i> | 106 | 85  | 190 |
| Tbg972.10.6060 | <i>T. brucei</i> | 42  | 705 | 746 |
| Tbg972.10.6070 | <i>T. brucei</i> | 65  | 57  | 121 |
| Tbg972.10.6090 | <i>T. brucei</i> | 57  | 85  | 141 |
| Tbg972.10.610  | <i>T. brucei</i> | 45  | 38  | 82  |
| Tbg972.10.6100 | <i>T. brucei</i> | 45  | 1   | 45  |
| Tbg972.10.6100 | <i>T. brucei</i> | 130 | 65  | 194 |
| Tbg972.10.6100 | <i>T. brucei</i> | 63  | 228 | 290 |
| Tbg972.10.6150 | <i>T. brucei</i> | 85  | 27  | 111 |
| Tbg972.10.6180 | <i>T. brucei</i> | 47  | 55  | 101 |
| Tbg972.10.6200 | <i>T. brucei</i> | 113 | 120 | 232 |
| Tbg972.10.6210 | <i>T. brucei</i> | 205 | 238 | 442 |
| Tbg972.10.6220 | <i>T. brucei</i> | 57  | 1   | 57  |
| Tbg972.10.6220 | <i>T. brucei</i> | 40  | 76  | 115 |
| Tbg972.10.6230 | <i>T. brucei</i> | 91  | 1   | 91  |
| Tbg972.10.6230 | <i>T. brucei</i> | 72  | 340 | 411 |
| Tbg972.10.6230 | <i>T. brucei</i> | 61  | 454 | 514 |
| Tbg972.10.6240 | <i>T. brucei</i> | 107 | 16  | 122 |



|                |                  |     |      |      |
|----------------|------------------|-----|------|------|
| Tbg972.10.6270 | <i>T. brucei</i> | 51  | 98   | 148  |
| Tbg972.10.6270 | <i>T. brucei</i> | 58  | 258  | 315  |
| Tbg972.10.6270 | <i>T. brucei</i> | 86  | 1008 | 1093 |
| Tbg972.10.6290 | <i>T. brucei</i> | 43  | 47   | 89   |
| Tbg972.10.6290 | <i>T. brucei</i> | 348 | 130  | 477  |
| Tbg972.10.6290 | <i>T. brucei</i> | 85  | 823  | 907  |
| Tbg972.10.630  | <i>T. brucei</i> | 97  | 181  | 277  |
| Tbg972.10.630  | <i>T. brucei</i> | 61  | 293  | 353  |
| Tbg972.10.630  | <i>T. brucei</i> | 73  | 389  | 461  |
| Tbg972.10.6300 | <i>T. brucei</i> | 105 | 1    | 105  |
| Tbg972.10.6320 | <i>T. brucei</i> | 187 | 1    | 187  |
| Tbg972.10.6330 | <i>T. brucei</i> | 67  | 138  | 204  |
| Tbg972.10.6330 | <i>T. brucei</i> | 197 | 235  | 431  |
| Tbg972.10.6370 | <i>T. brucei</i> | 116 | 535  | 650  |
| Tbg972.10.6370 | <i>T. brucei</i> | 81  | 789  | 869  |
| Tbg972.10.6370 | <i>T. brucei</i> | 67  | 1636 | 1702 |
| Tbg972.10.6390 | <i>T. brucei</i> | 174 | 380  | 553  |
| Tbg972.10.6390 | <i>T. brucei</i> | 64  | 592  | 655  |
| Tbg972.10.640  | <i>T. brucei</i> | 98  | 1    | 98   |
| Tbg972.10.640  | <i>T. brucei</i> | 541 | 117  | 657  |
| Tbg972.10.6410 | <i>T. brucei</i> | 57  | 105  | 161  |
| Tbg972.10.6420 | <i>T. brucei</i> | 80  | 34   | 113  |
| Tbg972.10.6420 | <i>T. brucei</i> | 43  | 159  | 201  |
| Tbg972.10.6420 | <i>T. brucei</i> | 167 | 209  | 375  |
| Tbg972.10.6420 | <i>T. brucei</i> | 42  | 572  | 613  |
| Tbg972.10.6420 | <i>T. brucei</i> | 65  | 725  | 789  |
| Tbg972.10.6420 | <i>T. brucei</i> | 81  | 921  | 1001 |
| Tbg972.10.6430 | <i>T. brucei</i> | 58  | 297  | 354  |
| Tbg972.10.6440 | <i>T. brucei</i> | 40  | 1    | 40   |
| Tbg972.10.6440 | <i>T. brucei</i> | 46  | 128  | 173  |
| Tbg972.10.6440 | <i>T. brucei</i> | 52  | 776  | 827  |
| Tbg972.10.6470 | <i>T. brucei</i> | 81  | 523  | 603  |
| Tbg972.10.650  | <i>T. brucei</i> | 70  | 1    | 70   |
| Tbg972.10.6510 | <i>T. brucei</i> | 67  | 87   | 153  |
| Tbg972.10.6520 | <i>T. brucei</i> | 67  | 87   | 153  |
| Tbg972.10.6530 | <i>T. brucei</i> | 121 | 1    | 121  |
| Tbg972.10.6530 | <i>T. brucei</i> | 109 | 2698 | 2806 |
| Tbg972.10.6530 | <i>T. brucei</i> | 43  | 2949 | 2991 |
| Tbg972.10.6530 | <i>T. brucei</i> | 40  | 3275 | 3314 |
| Tbg972.10.6550 | <i>T. brucei</i> | 76  | 144  | 219  |
| Tbg972.10.6560 | <i>T. brucei</i> | 100 | 1    | 100  |
| Tbg972.10.6570 | <i>T. brucei</i> | 76  | 97   | 172  |
| Tbg972.10.6590 | <i>T. brucei</i> | 67  | 199  | 265  |
| Tbg972.10.6600 | <i>T. brucei</i> | 127 | 71   | 197  |
| Tbg972.10.6600 | <i>T. brucei</i> | 50  | 255  | 304  |
| Tbg972.10.6600 | <i>T. brucei</i> | 47  | 317  | 363  |
| Tbg972.10.6610 | <i>T. brucei</i> | 74  | 218  | 291  |

|                |                  |     |     |     |
|----------------|------------------|-----|-----|-----|
| Tbg972.10.6630 | <i>T. brucei</i> | 78  | 1   | 78  |
| Tbg972.10.6640 | <i>T. brucei</i> | 42  | 1   | 42  |
| Tbg972.10.6640 | <i>T. brucei</i> | 115 | 170 | 284 |
| Tbg972.10.6640 | <i>T. brucei</i> | 41  | 419 | 459 |
| Tbg972.10.6640 | <i>T. brucei</i> | 105 | 582 | 686 |
| Tbg972.10.6640 | <i>T. brucei</i> | 59  | 737 | 795 |
| Tbg972.10.6650 | <i>T. brucei</i> | 67  | 59  | 125 |
| Tbg972.10.6670 | <i>T. brucei</i> | 67  | 59  | 125 |
| Tbg972.10.6680 | <i>T. brucei</i> | 44  | 107 | 150 |
| Tbg972.10.6680 | <i>T. brucei</i> | 51  | 243 | 293 |
| Tbg972.10.6690 | <i>T. brucei</i> | 51  | 61  | 111 |
| Tbg972.10.6700 | <i>T. brucei</i> | 77  | 1   | 77  |
| Tbg972.10.6700 | <i>T. brucei</i> | 42  | 254 | 295 |
| Tbg972.10.6700 | <i>T. brucei</i> | 64  | 366 | 429 |
| Tbg972.10.6780 | <i>T. brucei</i> | 62  | 64  | 125 |
| Tbg972.10.6780 | <i>T. brucei</i> | 47  | 162 | 208 |
| Tbg972.10.6780 | <i>T. brucei</i> | 69  | 251 | 319 |
| Tbg972.10.6790 | <i>T. brucei</i> | 73  | 202 | 274 |
| Tbg972.10.6790 | <i>T. brucei</i> | 57  | 542 | 598 |
| Tbg972.10.6810 | <i>T. brucei</i> | 43  | 238 | 280 |
| Tbg972.10.6840 | <i>T. brucei</i> | 51  | 1   | 51  |
| Tbg972.10.6850 | <i>T. brucei</i> | 81  | 1   | 81  |
| Tbg972.10.6850 | <i>T. brucei</i> | 43  | 143 | 185 |
| Tbg972.10.6850 | <i>T. brucei</i> | 43  | 143 | 185 |
| Tbg972.10.6860 | <i>T. brucei</i> | 65  | 1   | 65  |
| Tbg972.10.6860 | <i>T. brucei</i> | 72  | 286 | 357 |
| Tbg972.10.6860 | <i>T. brucei</i> | 72  | 286 | 357 |
| Tbg972.10.6870 | <i>T. brucei</i> | 92  | 94  | 185 |
| Tbg972.10.6880 | <i>T. brucei</i> | 58  | 238 | 295 |
| Tbg972.10.690  | <i>T. brucei</i> | 40  | 99  | 138 |
| Tbg972.10.6910 | <i>T. brucei</i> | 40  | 333 | 372 |
| Tbg972.10.6920 | <i>T. brucei</i> | 95  | 106 | 200 |
| Tbg972.10.6930 | <i>T. brucei</i> | 97  | 105 | 201 |
| Tbg972.10.700  | <i>T. brucei</i> | 47  | 44  | 90  |
| Tbg972.10.700  | <i>T. brucei</i> | 48  | 243 | 290 |
| Tbg972.10.7020 | <i>T. brucei</i> | 139 | 1   | 139 |
| Tbg972.10.7070 | <i>T. brucei</i> | 307 | 127 | 433 |
| Tbg972.10.7080 | <i>T. brucei</i> | 61  | 168 | 228 |
| Tbg972.10.7080 | <i>T. brucei</i> | 108 | 315 | 422 |
| Tbg972.10.7080 | <i>T. brucei</i> | 60  | 461 | 520 |
| Tbg972.10.7080 | <i>T. brucei</i> | 51  | 616 | 666 |
| Tbg972.10.7080 | <i>T. brucei</i> | 54  | 906 | 959 |
| Tbg972.10.7090 | <i>T. brucei</i> | 40  | 93  | 132 |
| Tbg972.10.7090 | <i>T. brucei</i> | 154 | 138 | 291 |
| Tbg972.10.7090 | <i>T. brucei</i> | 102 | 335 | 436 |
| Tbg972.10.7090 | <i>T. brucei</i> | 59  | 445 | 503 |
| Tbg972.10.710  | <i>T. brucei</i> | 41  | 89  | 129 |

|                |                  |     |      |      |
|----------------|------------------|-----|------|------|
| Tbg972.10.7100 | <i>T. brucei</i> | 57  | 59   | 115  |
| Tbg972.10.7110 | <i>T. brucei</i> | 42  | 122  | 163  |
| Tbg972.10.7110 | <i>T. brucei</i> | 59  | 467  | 525  |
| Tbg972.10.7110 | <i>T. brucei</i> | 42  | 3523 | 3564 |
| Tbg972.10.7140 | <i>T. brucei</i> | 174 | 30   | 203  |
| Tbg972.10.7140 | <i>T. brucei</i> | 135 | 241  | 375  |
| Tbg972.10.7140 | <i>T. brucei</i> | 82  | 399  | 480  |
| Tbg972.10.7170 | <i>T. brucei</i> | 141 | 1    | 141  |
| Tbg972.10.7170 | <i>T. brucei</i> | 128 | 148  | 275  |
| Tbg972.10.7170 | <i>T. brucei</i> | 334 | 293  | 626  |
| Tbg972.10.7180 | <i>T. brucei</i> | 99  | 493  | 591  |
| Tbg972.10.7180 | <i>T. brucei</i> | 69  | 618  | 686  |
| Tbg972.10.7180 | <i>T. brucei</i> | 56  | 850  | 905  |
| Tbg972.10.720  | <i>T. brucei</i> | 56  | 112  | 167  |
| Tbg972.10.7200 | <i>T. brucei</i> | 68  | 1    | 68   |
| Tbg972.10.7200 | <i>T. brucei</i> | 53  | 87   | 139  |
| Tbg972.10.7200 | <i>T. brucei</i> | 648 | 152  | 799  |
| Tbg972.10.7210 | <i>T. brucei</i> | 99  | 215  | 313  |
| Tbg972.10.7210 | <i>T. brucei</i> | 76  | 716  | 791  |
| Tbg972.10.7220 | <i>T. brucei</i> | 49  | 245  | 293  |
| Tbg972.10.7270 | <i>T. brucei</i> | 49  | 245  | 293  |
| Tbg972.10.7280 | <i>T. brucei</i> | 54  | 57   | 110  |
| Tbg972.10.7300 | <i>T. brucei</i> | 77  | 62   | 138  |
| Tbg972.10.7310 | <i>T. brucei</i> | 133 | 340  | 472  |
| Tbg972.10.7350 | <i>T. brucei</i> | 62  | 392  | 453  |
| Tbg972.10.7350 | <i>T. brucei</i> | 360 | 484  | 843  |
| Tbg972.10.7350 | <i>T. brucei</i> | 41  | 1302 | 1342 |
| Tbg972.10.7350 | <i>T. brucei</i> | 45  | 1466 | 1510 |
| Tbg972.10.7360 | <i>T. brucei</i> | 59  | 1    | 59   |
| Tbg972.10.7360 | <i>T. brucei</i> | 50  | 809  | 858  |
| Tbg972.10.7360 | <i>T. brucei</i> | 57  | 1010 | 1066 |
| Tbg972.10.7360 | <i>T. brucei</i> | 46  | 1100 | 1145 |
| Tbg972.10.7370 | <i>T. brucei</i> | 178 | 1    | 178  |
| Tbg972.10.7390 | <i>T. brucei</i> | 61  | 1    | 61   |
| Tbg972.10.740  | <i>T. brucei</i> | 87  | 1    | 87   |
| Tbg972.10.740  | <i>T. brucei</i> | 44  | 103  | 146  |
| Tbg972.10.740  | <i>T. brucei</i> | 63  | 338  | 400  |
| Tbg972.10.740  | <i>T. brucei</i> | 60  | 523  | 582  |
| Tbg972.10.740  | <i>T. brucei</i> | 281 | 705  | 985  |
| Tbg972.10.740  | <i>T. brucei</i> | 82  | 1002 | 1083 |
| Tbg972.10.7400 | <i>T. brucei</i> | 76  | 1628 | 1703 |
| Tbg972.10.7410 | <i>T. brucei</i> | 87  | 1    | 87   |
| Tbg972.10.7420 | <i>T. brucei</i> | 214 | 1    | 214  |
| Tbg972.10.7430 | <i>T. brucei</i> | 47  | 98   | 144  |
| Tbg972.10.7440 | <i>T. brucei</i> | 140 | 1    | 140  |
| Tbg972.10.7460 | <i>T. brucei</i> | 344 | 1    | 344  |
| Tbg972.10.7480 | <i>T. brucei</i> | 130 | 1    | 130  |

|                |                  |     |      |      |
|----------------|------------------|-----|------|------|
| Tbg972.10.7480 | <i>T. brucei</i> | 48  | 315  | 362  |
| Tbg972.10.7480 | <i>T. brucei</i> | 58  | 423  | 480  |
| Tbg972.10.7500 | <i>T. brucei</i> | 70  | 52   | 121  |
| Tbg972.10.7500 | <i>T. brucei</i> | 63  | 154  | 216  |
| Tbg972.10.7500 | <i>T. brucei</i> | 83  | 273  | 355  |
| Tbg972.10.7520 | <i>T. brucei</i> | 54  | 17   | 70   |
| Tbg972.10.7520 | <i>T. brucei</i> | 49  | 156  | 204  |
| Tbg972.10.7520 | <i>T. brucei</i> | 47  | 280  | 326  |
| Tbg972.10.7520 | <i>T. brucei</i> | 45  | 2341 | 2385 |
| Tbg972.10.7520 | <i>T. brucei</i> | 43  | 2860 | 2902 |
| Tbg972.10.7530 | <i>T. brucei</i> | 59  | 45   | 103  |
| Tbg972.10.7530 | <i>T. brucei</i> | 74  | 143  | 216  |
| Tbg972.10.7530 | <i>T. brucei</i> | 74  | 143  | 216  |
| Tbg972.10.7540 | <i>T. brucei</i> | 74  | 1    | 74   |
| Tbg972.10.7540 | <i>T. brucei</i> | 61  | 198  | 258  |
| Tbg972.10.7540 | <i>T. brucei</i> | 49  | 1200 | 1248 |
| Tbg972.10.7570 | <i>T. brucei</i> | 70  | 1    | 70   |
| Tbg972.10.7590 | <i>T. brucei</i> | 63  | 84   | 146  |
| Tbg972.10.7590 | <i>T. brucei</i> | 80  | 532  | 611  |
| Tbg972.10.7590 | <i>T. brucei</i> | 80  | 532  | 611  |
| Tbg972.10.760  | <i>T. brucei</i> | 50  | 206  | 255  |
| Tbg972.10.760  | <i>T. brucei</i> | 130 | 275  | 404  |
| Tbg972.10.760  | <i>T. brucei</i> | 48  | 484  | 531  |
| Tbg972.10.760  | <i>T. brucei</i> | 219 | 676  | 894  |
| Tbg972.10.760  | <i>T. brucei</i> | 86  | 964  | 1049 |
| Tbg972.10.760  | <i>T. brucei</i> | 81  | 1286 | 1366 |
| Tbg972.10.7600 | <i>T. brucei</i> | 50  | 361  | 410  |
| Tbg972.10.7600 | <i>T. brucei</i> | 90  | 712  | 801  |
| Tbg972.10.7620 | <i>T. brucei</i> | 173 | 231  | 403  |
| Tbg972.10.7630 | <i>T. brucei</i> | 116 | 1    | 116  |
| Tbg972.10.7630 | <i>T. brucei</i> | 176 | 137  | 312  |
| Tbg972.10.7630 | <i>T. brucei</i> | 46  | 382  | 427  |
| Tbg972.10.7640 | <i>T. brucei</i> | 111 | 1    | 111  |
| Tbg972.10.7640 | <i>T. brucei</i> | 56  | 549  | 604  |
| Tbg972.10.7670 | <i>T. brucei</i> | 40  | 1    | 40   |
| Tbg972.10.7670 | <i>T. brucei</i> | 96  | 417  | 512  |
| Tbg972.10.7680 | <i>T. brucei</i> | 53  | 358  | 410  |
| Tbg972.10.7690 | <i>T. brucei</i> | 151 | 653  | 803  |
| Tbg972.10.7710 | <i>T. brucei</i> | 40  | 203  | 242  |
| Tbg972.10.7710 | <i>T. brucei</i> | 50  | 361  | 410  |
| Tbg972.10.7710 | <i>T. brucei</i> | 52  | 562  | 613  |
| Tbg972.10.7730 | <i>T. brucei</i> | 69  | 1    | 69   |
| Tbg972.10.7730 | <i>T. brucei</i> | 54  | 1004 | 1057 |
| Tbg972.10.7730 | <i>T. brucei</i> | 203 | 1066 | 1268 |
| Tbg972.10.7730 | <i>T. brucei</i> | 142 | 1369 | 1510 |
| Tbg972.10.7730 | <i>T. brucei</i> | 75  | 1514 | 1588 |
| Tbg972.10.7740 | <i>T. brucei</i> | 220 | 17   | 236  |

|                |                  |     |     |     |
|----------------|------------------|-----|-----|-----|
| Tbg972.10.7740 | <i>T. brucei</i> | 95  | 256 | 350 |
| Tbg972.10.7750 | <i>T. brucei</i> | 275 | 80  | 354 |
| Tbg972.10.7760 | <i>T. brucei</i> | 70  | 169 | 238 |
| Tbg972.10.7780 | <i>T. brucei</i> | 53  | 65  | 117 |
| Tbg972.10.7790 | <i>T. brucei</i> | 44  | 255 | 298 |
| Tbg972.10.7810 | <i>T. brucei</i> | 96  | 18  | 113 |
| Tbg972.10.7830 | <i>T. brucei</i> | 54  | 425 | 478 |
| Tbg972.10.7860 | <i>T. brucei</i> | 63  | 1   | 63  |
| Tbg972.10.7860 | <i>T. brucei</i> | 73  | 66  | 138 |
| Tbg972.10.7880 | <i>T. brucei</i> | 68  | 1   | 68  |
| Tbg972.10.790  | <i>T. brucei</i> | 335 | 1   | 335 |
| Tbg972.10.790  | <i>T. brucei</i> | 53  | 517 | 569 |
| Tbg972.10.7930 | <i>T. brucei</i> | 94  | 43  | 136 |
| Tbg972.10.7930 | <i>T. brucei</i> | 100 | 164 | 263 |
| Tbg972.10.7940 | <i>T. brucei</i> | 139 | 1   | 139 |
| Tbg972.10.7970 | <i>T. brucei</i> | 49  | 479 | 527 |
| Tbg972.10.7990 | <i>T. brucei</i> | 58  | 1   | 58  |
| Tbg972.10.7990 | <i>T. brucei</i> | 60  | 481 | 540 |
| Tbg972.10.8000 | <i>T. brucei</i> | 101 | 25  | 125 |
| Tbg972.10.8020 | <i>T. brucei</i> | 143 | 87  | 229 |
| Tbg972.10.8030 | <i>T. brucei</i> | 56  | 125 | 180 |
| Tbg972.10.8040 | <i>T. brucei</i> | 82  | 132 | 213 |
| Tbg972.10.8040 | <i>T. brucei</i> | 52  | 237 | 288 |
| Tbg972.10.8050 | <i>T. brucei</i> | 135 | 1   | 135 |
| Tbg972.10.8050 | <i>T. brucei</i> | 106 | 233 | 338 |
| Tbg972.10.8050 | <i>T. brucei</i> | 141 | 409 | 549 |
| Tbg972.10.8060 | <i>T. brucei</i> | 117 | 382 | 498 |
| Tbg972.10.8070 | <i>T. brucei</i> | 68  | 69  | 136 |
| Tbg972.10.8080 | <i>T. brucei</i> | 63  | 212 | 274 |
| Tbg972.10.8090 | <i>T. brucei</i> | 48  | 87  | 134 |
| Tbg972.10.8090 | <i>T. brucei</i> | 171 | 153 | 323 |
| Tbg972.10.8090 | <i>T. brucei</i> | 43  | 404 | 446 |
| Tbg972.10.810  | <i>T. brucei</i> | 40  | 73  | 112 |
| Tbg972.10.8100 | <i>T. brucei</i> | 51  | 1   | 51  |
| Tbg972.10.8110 | <i>T. brucei</i> | 79  | 490 | 568 |
| Tbg972.10.8120 | <i>T. brucei</i> | 45  | 1   | 45  |
| Tbg972.10.8140 | <i>T. brucei</i> | 47  | 55  | 101 |
| Tbg972.10.8150 | <i>T. brucei</i> | 78  | 1   | 78  |
| Tbg972.10.8150 | <i>T. brucei</i> | 56  | 150 | 205 |
| Tbg972.10.8190 | <i>T. brucei</i> | 41  | 473 | 513 |
| Tbg972.10.820  | <i>T. brucei</i> | 66  | 135 | 200 |
| Tbg972.10.8200 | <i>T. brucei</i> | 46  | 1   | 46  |
| Tbg972.10.8210 | <i>T. brucei</i> | 121 | 94  | 214 |
| Tbg972.10.8210 | <i>T. brucei</i> | 84  | 286 | 369 |
| Tbg972.10.8210 | <i>T. brucei</i> | 86  | 405 | 490 |
| Tbg972.10.8220 | <i>T. brucei</i> | 64  | 333 | 396 |
| Tbg972.10.8230 | <i>T. brucei</i> | 41  | 1   | 41  |

|                |                  |     |      |      |
|----------------|------------------|-----|------|------|
| Tbg972.10.8290 | <i>T. brucei</i> | 65  | 49   | 113  |
| Tbg972.10.8290 | <i>T. brucei</i> | 77  | 384  | 460  |
| Tbg972.10.8290 | <i>T. brucei</i> | 134 | 792  | 925  |
| Tbg972.10.8290 | <i>T. brucei</i> | 60  | 1006 | 1065 |
| Tbg972.10.8290 | <i>T. brucei</i> | 62  | 1328 | 1389 |
| Tbg972.10.8290 | <i>T. brucei</i> | 92  | 1557 | 1648 |
| Tbg972.10.830  | <i>T. brucei</i> | 223 | 1    | 223  |
| Tbg972.10.830  | <i>T. brucei</i> | 52  | 356  | 407  |
| Tbg972.10.8320 | <i>T. brucei</i> | 56  | 1    | 56   |
| Tbg972.10.8330 | <i>T. brucei</i> | 58  | 1    | 58   |
| Tbg972.10.8340 | <i>T. brucei</i> | 48  | 248  | 295  |
| Tbg972.10.8350 | <i>T. brucei</i> | 51  | 1    | 51   |
| Tbg972.10.8370 | <i>T. brucei</i> | 92  | 229  | 320  |
| Tbg972.10.8390 | <i>T. brucei</i> | 40  | 63   | 102  |
| Tbg972.10.840  | <i>T. brucei</i> | 42  | 289  | 330  |
| Tbg972.10.840  | <i>T. brucei</i> | 84  | 499  | 582  |
| Tbg972.10.840  | <i>T. brucei</i> | 84  | 499  | 582  |
| Tbg972.10.8420 | <i>T. brucei</i> | 43  | 125  | 167  |
| Tbg972.10.8420 | <i>T. brucei</i> | 103 | 422  | 524  |
| Tbg972.10.8420 | <i>T. brucei</i> | 103 | 422  | 524  |
| Tbg972.10.8450 | <i>T. brucei</i> | 52  | 1    | 52   |
| Tbg972.10.8490 | <i>T. brucei</i> | 44  | 36   | 79   |
| Tbg972.10.8490 | <i>T. brucei</i> | 74  | 493  | 566  |
| Tbg972.10.8490 | <i>T. brucei</i> | 78  | 855  | 932  |
| Tbg972.10.8520 | <i>T. brucei</i> | 69  | 31   | 99   |
| Tbg972.10.8540 | <i>T. brucei</i> | 67  | 220  | 286  |
| Tbg972.10.8550 | <i>T. brucei</i> | 107 | 393  | 499  |
| Tbg972.10.8570 | <i>T. brucei</i> | 186 | 83   | 268  |
| Tbg972.10.8580 | <i>T. brucei</i> | 45  | 282  | 326  |
| Tbg972.10.8590 | <i>T. brucei</i> | 49  | 1    | 49   |
| Tbg972.10.860  | <i>T. brucei</i> | 43  | 140  | 182  |
| Tbg972.10.860  | <i>T. brucei</i> | 142 | 204  | 345  |
| Tbg972.10.8600 | <i>T. brucei</i> | 89  | 462  | 550  |
| Tbg972.10.8610 | <i>T. brucei</i> | 41  | 1    | 41   |
| Tbg972.10.8630 | <i>T. brucei</i> | 60  | 91   | 150  |
| Tbg972.10.8630 | <i>T. brucei</i> | 75  | 225  | 299  |
| Tbg972.10.8630 | <i>T. brucei</i> | 41  | 648  | 688  |
| Tbg972.10.870  | <i>T. brucei</i> | 58  | 99   | 156  |
| Tbg972.10.8700 | <i>T. brucei</i> | 106 | 1    | 106  |
| Tbg972.10.8700 | <i>T. brucei</i> | 53  | 238  | 290  |
| Tbg972.10.8700 | <i>T. brucei</i> | 53  | 238  | 290  |
| Tbg972.10.8720 | <i>T. brucei</i> | 45  | 664  | 708  |
| Tbg972.10.8750 | <i>T. brucei</i> | 49  | 165  | 213  |
| Tbg972.10.8760 | <i>T. brucei</i> | 41  | 110  | 150  |
| Tbg972.10.8770 | <i>T. brucei</i> | 54  | 58   | 111  |
| Tbg972.10.8790 | <i>T. brucei</i> | 359 | 1    | 359  |
| Tbg972.10.8800 | <i>T. brucei</i> | 678 | 57   | 734  |

|                |                  |     |      |      |
|----------------|------------------|-----|------|------|
| Tbg972.10.8820 | <i>T. brucei</i> | 106 | 23   | 128  |
| Tbg972.10.8840 | <i>T. brucei</i> | 129 | 78   | 206  |
| Tbg972.10.8870 | <i>T. brucei</i> | 40  | 917  | 956  |
| Tbg972.10.8870 | <i>T. brucei</i> | 54  | 1310 | 1363 |
| Tbg972.10.8870 | <i>T. brucei</i> | 72  | 1964 | 2035 |
| Tbg972.10.8870 | <i>T. brucei</i> | 53  | 2470 | 2522 |
| Tbg972.10.8890 | <i>T. brucei</i> | 112 | 99   | 210  |
| Tbg972.10.8890 | <i>T. brucei</i> | 139 | 215  | 353  |
| Tbg972.10.8920 | <i>T. brucei</i> | 72  | 308  | 379  |
| Tbg972.10.8920 | <i>T. brucei</i> | 126 | 400  | 525  |
| Tbg972.10.8930 | <i>T. brucei</i> | 67  | 30   | 96   |
| Tbg972.10.8930 | <i>T. brucei</i> | 97  | 128  | 224  |
| Tbg972.10.8930 | <i>T. brucei</i> | 154 | 244  | 397  |
| Tbg972.10.8940 | <i>T. brucei</i> | 139 | 1    | 139  |
| Tbg972.10.8940 | <i>T. brucei</i> | 59  | 1097 | 1155 |
| Tbg972.10.8960 | <i>T. brucei</i> | 65  | 1    | 65   |
| Tbg972.10.8980 | <i>T. brucei</i> | 66  | 746  | 811  |
| Tbg972.10.9000 | <i>T. brucei</i> | 46  | 92   | 137  |
| Tbg972.10.9010 | <i>T. brucei</i> | 46  | 92   | 137  |
| Tbg972.10.9020 | <i>T. brucei</i> | 58  | 888  | 945  |
| Tbg972.10.9020 | <i>T. brucei</i> | 86  | 1494 | 1579 |
| Tbg972.10.9020 | <i>T. brucei</i> | 60  | 1697 | 1756 |
| Tbg972.10.9030 | <i>T. brucei</i> | 40  | 1    | 40   |
| Tbg972.10.9050 | <i>T. brucei</i> | 53  | 26   | 78   |
| Tbg972.10.9050 | <i>T. brucei</i> | 43  | 307  | 349  |
| Tbg972.10.9050 | <i>T. brucei</i> | 43  | 307  | 349  |
| Tbg972.10.9080 | <i>T. brucei</i> | 44  | 21   | 64   |
| Tbg972.10.9090 | <i>T. brucei</i> | 41  | 467  | 507  |
| Tbg972.10.910  | <i>T. brucei</i> | 55  | 1    | 55   |
| Tbg972.10.910  | <i>T. brucei</i> | 97  | 394  | 490  |
| Tbg972.10.910  | <i>T. brucei</i> | 765 | 607  | 1371 |
| Tbg972.10.910  | <i>T. brucei</i> | 107 | 1378 | 1484 |
| Tbg972.10.910  | <i>T. brucei</i> | 57  | 1538 | 1594 |
| Tbg972.10.910  | <i>T. brucei</i> | 40  | 1609 | 1648 |
| Tbg972.10.910  | <i>T. brucei</i> | 60  | 1660 | 1719 |
| Tbg972.10.9100 | <i>T. brucei</i> | 103 | 117  | 219  |
| Tbg972.10.9110 | <i>T. brucei</i> | 50  | 24   | 73   |
| Tbg972.10.9110 | <i>T. brucei</i> | 50  | 369  | 418  |
| Tbg972.10.9110 | <i>T. brucei</i> | 50  | 369  | 418  |
| Tbg972.10.9120 | <i>T. brucei</i> | 71  | 674  | 744  |
| Tbg972.10.9150 | <i>T. brucei</i> | 49  | 102  | 150  |
| Tbg972.10.9180 | <i>T. brucei</i> | 62  | 1    | 62   |
| Tbg972.10.9190 | <i>T. brucei</i> | 89  | 1    | 89   |
| Tbg972.10.920  | <i>T. brucei</i> | 42  | 176  | 217  |
| Tbg972.10.920  | <i>T. brucei</i> | 129 | 398  | 526  |
| Tbg972.10.920  | <i>T. brucei</i> | 103 | 558  | 660  |
| Tbg972.10.920  | <i>T. brucei</i> | 76  | 736  | 811  |

|                |                  |     |      |      |
|----------------|------------------|-----|------|------|
| Tbg972.10.920  | <i>T. brucei</i> | 127 | 858  | 984  |
| Tbg972.10.920  | <i>T. brucei</i> | 195 | 1000 | 1194 |
| Tbg972.10.920  | <i>T. brucei</i> | 86  | 1332 | 1417 |
| Tbg972.10.9230 | <i>T. brucei</i> | 64  | 73   | 136  |
| Tbg972.10.9240 | <i>T. brucei</i> | 42  | 170  | 211  |
| Tbg972.10.9240 | <i>T. brucei</i> | 78  | 779  | 856  |
| Tbg972.10.9240 | <i>T. brucei</i> | 78  | 779  | 856  |
| Tbg972.10.9270 | <i>T. brucei</i> | 117 | 103  | 219  |
| Tbg972.10.9290 | <i>T. brucei</i> | 75  | 38   | 112  |
| Tbg972.10.9300 | <i>T. brucei</i> | 152 | 214  | 365  |
| Tbg972.10.9310 | <i>T. brucei</i> | 55  | 13   | 67   |
| Tbg972.10.9310 | <i>T. brucei</i> | 61  | 85   | 145  |
| Tbg972.10.9310 | <i>T. brucei</i> | 129 | 374  | 502  |
| Tbg972.10.9310 | <i>T. brucei</i> | 66  | 569  | 634  |
| Tbg972.10.9310 | <i>T. brucei</i> | 69  | 1364 | 1432 |
| Tbg972.10.9320 | <i>T. brucei</i> | 92  | 1    | 92   |
| Tbg972.10.9320 | <i>T. brucei</i> | 107 | 551  | 657  |
| Tbg972.10.9340 | <i>T. brucei</i> | 55  | 56   | 110  |
| Tbg972.10.9370 | <i>T. brucei</i> | 96  | 40   | 135  |
| Tbg972.10.9390 | <i>T. brucei</i> | 49  | 1    | 49   |
| Tbg972.10.9390 | <i>T. brucei</i> | 74  | 169  | 242  |
| Tbg972.10.9410 | <i>T. brucei</i> | 111 | 83   | 193  |
| Tbg972.10.9420 | <i>T. brucei</i> | 46  | 16   | 61   |
| Tbg972.10.9420 | <i>T. brucei</i> | 41  | 355  | 395  |
| Tbg972.10.9420 | <i>T. brucei</i> | 41  | 355  | 395  |
| Tbg972.10.9440 | <i>T. brucei</i> | 49  | 1    | 49   |
| Tbg972.10.9440 | <i>T. brucei</i> | 46  | 165  | 210  |
| Tbg972.10.9440 | <i>T. brucei</i> | 46  | 165  | 210  |
| Tbg972.10.9450 | <i>T. brucei</i> | 148 | 1    | 148  |
| Tbg972.10.9460 | <i>T. brucei</i> | 92  | 1    | 92   |
| Tbg972.10.9470 | <i>T. brucei</i> | 85  | 200  | 284  |
| Tbg972.10.9470 | <i>T. brucei</i> | 51  | 296  | 346  |
| Tbg972.10.9470 | <i>T. brucei</i> | 51  | 296  | 346  |
| Tbg972.10.950  | <i>T. brucei</i> | 155 | 1    | 155  |
| Tbg972.10.950  | <i>T. brucei</i> | 42  | 195  | 236  |
| Tbg972.10.950  | <i>T. brucei</i> | 55  | 238  | 292  |
| Tbg972.10.950  | <i>T. brucei</i> | 140 | 418  | 557  |
| Tbg972.10.950  | <i>T. brucei</i> | 149 | 688  | 836  |
| Tbg972.10.950  | <i>T. brucei</i> | 118 | 860  | 977  |
| Tbg972.10.950  | <i>T. brucei</i> | 149 | 1047 | 1195 |
| Tbg972.10.950  | <i>T. brucei</i> | 77  | 1275 | 1351 |
| Tbg972.10.9530 | <i>T. brucei</i> | 150 | 81   | 230  |
| Tbg972.10.9550 | <i>T. brucei</i> | 132 | 175  | 306  |
| Tbg972.10.9570 | <i>T. brucei</i> | 135 | 1    | 135  |
| Tbg972.10.9570 | <i>T. brucei</i> | 94  | 199  | 292  |
| Tbg972.10.9570 | <i>T. brucei</i> | 330 | 383  | 712  |
| Tbg972.10.9590 | <i>T. brucei</i> | 62  | 83   | 144  |



|                |                  |     |      |      |
|----------------|------------------|-----|------|------|
| Tbg972.10.9590 | <i>T. brucei</i> | 64  | 430  | 493  |
| Tbg972.10.960  | <i>T. brucei</i> | 76  | 380  | 455  |
| Tbg972.10.9600 | <i>T. brucei</i> | 112 | 1    | 112  |
| Tbg972.10.9600 | <i>T. brucei</i> | 126 | 160  | 285  |
| Tbg972.10.9620 | <i>T. brucei</i> | 140 | 75   | 214  |
| Tbg972.10.9650 | <i>T. brucei</i> | 61  | 1    | 61   |
| Tbg972.10.9650 | <i>T. brucei</i> | 44  | 78   | 121  |
| Tbg972.10.9650 | <i>T. brucei</i> | 198 | 157  | 354  |
| Tbg972.10.9650 | <i>T. brucei</i> | 57  | 514  | 570  |
| Tbg972.10.9660 | <i>T. brucei</i> | 50  | 1    | 50   |
| Tbg972.10.9670 | <i>T. brucei</i> | 43  | 672  | 714  |
| Tbg972.10.970  | <i>T. brucei</i> | 45  | 34   | 78   |
| Tbg972.10.970  | <i>T. brucei</i> | 233 | 379  | 611  |
| Tbg972.10.970  | <i>T. brucei</i> | 191 | 750  | 940  |
| Tbg972.10.970  | <i>T. brucei</i> | 134 | 989  | 1122 |
| Tbg972.10.970  | <i>T. brucei</i> | 64  | 1384 | 1447 |
| Tbg972.10.970  | <i>T. brucei</i> | 82  | 1569 | 1650 |
| Tbg972.10.970  | <i>T. brucei</i> | 68  | 1704 | 1771 |
| Tbg972.10.9730 | <i>T. brucei</i> | 50  | 1    | 50   |
| Tbg972.10.9740 | <i>T. brucei</i> | 155 | 1    | 155  |
| Tbg972.10.9770 | <i>T. brucei</i> | 40  | 71   | 110  |
| Tbg972.10.9790 | <i>T. brucei</i> | 49  | 1    | 49   |
| Tbg972.10.9790 | <i>T. brucei</i> | 69  | 86   | 154  |
| Tbg972.10.9790 | <i>T. brucei</i> | 47  | 290  | 336  |
| Tbg972.10.9790 | <i>T. brucei</i> | 92  | 415  | 506  |
| Tbg972.10.9790 | <i>T. brucei</i> | 55  | 636  | 690  |
| Tbg972.10.980  | <i>T. brucei</i> | 177 | 1    | 177  |
| Tbg972.10.980  | <i>T. brucei</i> | 208 | 190  | 397  |
| Tbg972.10.980  | <i>T. brucei</i> | 83  | 565  | 647  |
| Tbg972.10.980  | <i>T. brucei</i> | 83  | 659  | 741  |
| Tbg972.10.980  | <i>T. brucei</i> | 83  | 753  | 835  |
| Tbg972.10.980  | <i>T. brucei</i> | 82  | 889  | 970  |
| Tbg972.10.980  | <i>T. brucei</i> | 65  | 1109 | 1173 |
| Tbg972.10.980  | <i>T. brucei</i> | 43  | 1374 | 1416 |
| Tbg972.10.980  | <i>T. brucei</i> | 194 | 1591 | 1784 |
| Tbg972.10.980  | <i>T. brucei</i> | 63  | 1898 | 1960 |
| Tbg972.10.980  | <i>T. brucei</i> | 200 | 1992 | 2191 |
| Tbg972.10.980  | <i>T. brucei</i> | 217 | 2268 | 2484 |
| Tbg972.10.980  | <i>T. brucei</i> | 90  | 2521 | 2610 |
| Tbg972.10.980  | <i>T. brucei</i> | 43  | 2612 | 2654 |
| Tbg972.10.9830 | <i>T. brucei</i> | 101 | 595  | 695  |
| Tbg972.10.9840 | <i>T. brucei</i> | 67  | 36   | 102  |
| Tbg972.10.9860 | <i>T. brucei</i> | 56  | 218  | 273  |
| Tbg972.10.9870 | <i>T. brucei</i> | 47  | 45   | 91   |
| Tbg972.10.990  | <i>T. brucei</i> | 61  | 111  | 171  |
| Tbg972.10.9910 | <i>T. brucei</i> | 63  | 1    | 63   |
| Tbg972.10.9940 | <i>T. brucei</i> | 141 | 77   | 217  |

|                 |                  |     |      |      |
|-----------------|------------------|-----|------|------|
| Tbg972.10.9940  | <i>T. brucei</i> | 45  | 271  | 315  |
| Tbg972.10.9940  | <i>T. brucei</i> | 45  | 435  | 479  |
| Tbg972.10.9950  | <i>T. brucei</i> | 50  | 112  | 161  |
| Tbg972.10.9960  | <i>T. brucei</i> | 142 | 160  | 301  |
| Tbg972.10.9980  | <i>T. brucei</i> | 42  | 1    | 42   |
| Tbg972.10.9980  | <i>T. brucei</i> | 43  | 540  | 582  |
| Tbg972.10.9980  | <i>T. brucei</i> | 43  | 540  | 582  |
| Tbg972.11.10    | <i>T. brucei</i> | 41  | 1123 | 1163 |
| Tbg972.11.100   | <i>T. brucei</i> | 53  | 412  | 464  |
| Tbg972.11.100   | <i>T. brucei</i> | 62  | 682  | 743  |
| Tbg972.11.100   | <i>T. brucei</i> | 62  | 682  | 743  |
| Tbg972.11.10010 | <i>T. brucei</i> | 364 | 350  | 713  |
| Tbg972.11.10020 | <i>T. brucei</i> | 95  | 571  | 665  |
| Tbg972.11.10020 | <i>T. brucei</i> | 47  | 1112 | 1158 |
| Tbg972.11.10040 | <i>T. brucei</i> | 40  | 294  | 333  |
| Tbg972.11.10050 | <i>T. brucei</i> | 61  | 154  | 214  |
| Tbg972.11.10060 | <i>T. brucei</i> | 60  | 17   | 76   |
| Tbg972.11.10070 | <i>T. brucei</i> | 60  | 17   | 76   |
| Tbg972.11.10080 | <i>T. brucei</i> | 62  | 16   | 77   |
| Tbg972.11.10100 | <i>T. brucei</i> | 59  | 1    | 59   |
| Tbg972.11.10100 | <i>T. brucei</i> | 47  | 67   | 113  |
| Tbg972.11.10100 | <i>T. brucei</i> | 47  | 67   | 113  |
| Tbg972.11.10110 | <i>T. brucei</i> | 87  | 1    | 87   |
| Tbg972.11.10110 | <i>T. brucei</i> | 46  | 279  | 324  |
| Tbg972.11.10120 | <i>T. brucei</i> | 341 | 41   | 381  |
| Tbg972.11.10130 | <i>T. brucei</i> | 69  | 49   | 117  |
| Tbg972.11.10140 | <i>T. brucei</i> | 72  | 1    | 72   |
| Tbg972.11.10140 | <i>T. brucei</i> | 101 | 416  | 516  |
| Tbg972.11.10140 | <i>T. brucei</i> | 268 | 529  | 796  |
| Tbg972.11.10140 | <i>T. brucei</i> | 56  | 1072 | 1127 |
| Tbg972.11.10140 | <i>T. brucei</i> | 76  | 1141 | 1216 |
| Tbg972.11.10180 | <i>T. brucei</i> | 60  | 1    | 60   |
| Tbg972.11.10180 | <i>T. brucei</i> | 96  | 96   | 191  |
| Tbg972.11.10180 | <i>T. brucei</i> | 54  | 257  | 310  |
| Tbg972.11.10190 | <i>T. brucei</i> | 67  | 68   | 134  |
| Tbg972.11.10190 | <i>T. brucei</i> | 68  | 719  | 786  |
| Tbg972.11.10200 | <i>T. brucei</i> | 50  | 376  | 425  |
| Tbg972.11.10210 | <i>T. brucei</i> | 48  | 59   | 106  |
| Tbg972.11.10230 | <i>T. brucei</i> | 119 | 39   | 157  |
| Tbg972.11.10230 | <i>T. brucei</i> | 45  | 541  | 585  |
| Tbg972.11.10230 | <i>T. brucei</i> | 42  | 828  | 869  |
| Tbg972.11.10230 | <i>T. brucei</i> | 108 | 989  | 1096 |
| Tbg972.11.10230 | <i>T. brucei</i> | 81  | 1192 | 1272 |
| Tbg972.11.10250 | <i>T. brucei</i> | 65  | 777  | 841  |
| Tbg972.11.10260 | <i>T. brucei</i> | 164 | 128  | 291  |
| Tbg972.11.10280 | <i>T. brucei</i> | 41  | 39   | 79   |
| Tbg972.11.10280 | <i>T. brucei</i> | 50  | 321  | 370  |

|                 |                  |     |      |      |
|-----------------|------------------|-----|------|------|
| Tbg972.11.10280 | <i>T. brucei</i> | 56  | 777  | 832  |
| Tbg972.11.10290 | <i>T. brucei</i> | 40  | 67   | 106  |
| Tbg972.11.10300 | <i>T. brucei</i> | 52  | 116  | 167  |
| Tbg972.11.10320 | <i>T. brucei</i> | 50  | 285  | 334  |
| Tbg972.11.10320 | <i>T. brucei</i> | 81  | 826  | 906  |
| Tbg972.11.10330 | <i>T. brucei</i> | 86  | 91   | 176  |
| Tbg972.11.10330 | <i>T. brucei</i> | 43  | 272  | 314  |
| Tbg972.11.10340 | <i>T. brucei</i> | 112 | 1    | 112  |
| Tbg972.11.10340 | <i>T. brucei</i> | 154 | 172  | 325  |
| Tbg972.11.10340 | <i>T. brucei</i> | 77  | 362  | 438  |
| Tbg972.11.10340 | <i>T. brucei</i> | 67  | 529  | 595  |
| Tbg972.11.10340 | <i>T. brucei</i> | 45  | 617  | 661  |
| Tbg972.11.10340 | <i>T. brucei</i> | 116 | 736  | 851  |
| Tbg972.11.10340 | <i>T. brucei</i> | 112 | 855  | 966  |
| Tbg972.11.10340 | <i>T. brucei</i> | 425 | 984  | 1408 |
| Tbg972.11.10340 | <i>T. brucei</i> | 75  | 1611 | 1685 |
| Tbg972.11.10340 | <i>T. brucei</i> | 43  | 1813 | 1855 |
| Tbg972.11.10350 | <i>T. brucei</i> | 87  | 21   | 107  |
| Tbg972.11.10360 | <i>T. brucei</i> | 40  | 253  | 292  |
| Tbg972.11.10370 | <i>T. brucei</i> | 102 | 175  | 276  |
| Tbg972.11.10390 | <i>T. brucei</i> | 87  | 1    | 87   |
| Tbg972.11.10390 | <i>T. brucei</i> | 56  | 171  | 226  |
| Tbg972.11.10390 | <i>T. brucei</i> | 40  | 290  | 329  |
| Tbg972.11.10390 | <i>T. brucei</i> | 43  | 497  | 539  |
| Tbg972.11.1040  | <i>T. brucei</i> | 577 | 1    | 577  |
| Tbg972.11.1040  | <i>T. brucei</i> | 113 | 589  | 701  |
| Tbg972.11.1040  | <i>T. brucei</i> | 93  | 838  | 930  |
| Tbg972.11.1040  | <i>T. brucei</i> | 69  | 940  | 1008 |
| Tbg972.11.10400 | <i>T. brucei</i> | 65  | 225  | 289  |
| Tbg972.11.10400 | <i>T. brucei</i> | 380 | 309  | 688  |
| Tbg972.11.10410 | <i>T. brucei</i> | 45  | 1    | 45   |
| Tbg972.11.10420 | <i>T. brucei</i> | 54  | 61   | 114  |
| Tbg972.11.10420 | <i>T. brucei</i> | 108 | 453  | 560  |
| Tbg972.11.10430 | <i>T. brucei</i> | 97  | 70   | 166  |
| Tbg972.11.10430 | <i>T. brucei</i> | 53  | 268  | 320  |
| Tbg972.11.10430 | <i>T. brucei</i> | 46  | 878  | 923  |
| Tbg972.11.10450 | <i>T. brucei</i> | 100 | 64   | 163  |
| Tbg972.11.10480 | <i>T. brucei</i> | 41  | 21   | 61   |
| Tbg972.11.10500 | <i>T. brucei</i> | 40  | 1    | 40   |
| Tbg972.11.10500 | <i>T. brucei</i> | 106 | 365  | 470  |
| Tbg972.11.10530 | <i>T. brucei</i> | 368 | 410  | 777  |
| Tbg972.11.10550 | <i>T. brucei</i> | 434 | 554  | 987  |
| Tbg972.11.10560 | <i>T. brucei</i> | 51  | 122  | 172  |
| Tbg972.11.10570 | <i>T. brucei</i> | 76  | 1    | 76   |
| Tbg972.11.10590 | <i>T. brucei</i> | 106 | 202  | 307  |
| Tbg972.11.1060  | <i>T. brucei</i> | 63  | 79   | 141  |
| Tbg972.11.10630 | <i>T. brucei</i> | 224 | 130  | 353  |

|                 |                  |     |     |     |
|-----------------|------------------|-----|-----|-----|
| Tbg972.11.10640 | <i>T. brucei</i> | 53  | 1   | 53  |
| Tbg972.11.10640 | <i>T. brucei</i> | 68  | 79  | 146 |
| Tbg972.11.10640 | <i>T. brucei</i> | 68  | 79  | 146 |
| Tbg972.11.10670 | <i>T. brucei</i> | 102 | 36  | 137 |
| Tbg972.11.10680 | <i>T. brucei</i> | 126 | 35  | 160 |
| Tbg972.11.10680 | <i>T. brucei</i> | 100 | 167 | 266 |
| Tbg972.11.10680 | <i>T. brucei</i> | 100 | 167 | 266 |
| Tbg972.11.1070  | <i>T. brucei</i> | 72  | 109 | 180 |
| Tbg972.11.1070  | <i>T. brucei</i> | 112 | 194 | 305 |
| Tbg972.11.10710 | <i>T. brucei</i> | 51  | 24  | 74  |
| Tbg972.11.10710 | <i>T. brucei</i> | 443 | 100 | 542 |
| Tbg972.11.10710 | <i>T. brucei</i> | 443 | 100 | 542 |
| Tbg972.11.10740 | <i>T. brucei</i> | 53  | 193 | 245 |
| Tbg972.11.10800 | <i>T. brucei</i> | 178 | 358 | 535 |
| Tbg972.11.10800 | <i>T. brucei</i> | 71  | 556 | 626 |
| Tbg972.11.10800 | <i>T. brucei</i> | 109 | 637 | 745 |
| Tbg972.11.10810 | <i>T. brucei</i> | 228 | 1   | 228 |
| Tbg972.11.10820 | <i>T. brucei</i> | 51  | 116 | 166 |
| Tbg972.11.10830 | <i>T. brucei</i> | 147 | 338 | 484 |
| Tbg972.11.10840 | <i>T. brucei</i> | 41  | 1   | 41  |
| Tbg972.11.10850 | <i>T. brucei</i> | 102 | 1   | 102 |
| Tbg972.11.10870 | <i>T. brucei</i> | 100 | 131 | 230 |
| Tbg972.11.10870 | <i>T. brucei</i> | 97  | 264 | 360 |
| Tbg972.11.10870 | <i>T. brucei</i> | 122 | 475 | 596 |
| Tbg972.11.10890 | <i>T. brucei</i> | 42  | 1   | 42  |
| Tbg972.11.10900 | <i>T. brucei</i> | 48  | 1   | 48  |
| Tbg972.11.10920 | <i>T. brucei</i> | 80  | 1   | 80  |
| Tbg972.11.10920 | <i>T. brucei</i> | 73  | 98  | 170 |
| Tbg972.11.10940 | <i>T. brucei</i> | 142 | 114 | 255 |
| Tbg972.11.10940 | <i>T. brucei</i> | 112 | 483 | 594 |
| Tbg972.11.10960 | <i>T. brucei</i> | 43  | 144 | 186 |
| Tbg972.11.10990 | <i>T. brucei</i> | 66  | 45  | 110 |
| Tbg972.11.1100  | <i>T. brucei</i> | 323 | 1   | 323 |
| Tbg972.11.1100  | <i>T. brucei</i> | 207 | 385 | 591 |
| Tbg972.11.11010 | <i>T. brucei</i> | 65  | 1   | 65  |
| Tbg972.11.11080 | <i>T. brucei</i> | 60  | 61  | 120 |
| Tbg972.11.1110  | <i>T. brucei</i> | 59  | 40  | 98  |
| Tbg972.11.1110  | <i>T. brucei</i> | 78  | 457 | 534 |
| Tbg972.11.1110  | <i>T. brucei</i> | 78  | 457 | 534 |
| Tbg972.11.11100 | <i>T. brucei</i> | 85  | 243 | 327 |
| Tbg972.11.11120 | <i>T. brucei</i> | 129 | 125 | 253 |
| Tbg972.11.11130 | <i>T. brucei</i> | 149 | 80  | 228 |
| Tbg972.11.11140 | <i>T. brucei</i> | 47  | 50  | 96  |
| Tbg972.11.11140 | <i>T. brucei</i> | 53  | 182 | 234 |
| Tbg972.11.11140 | <i>T. brucei</i> | 50  | 317 | 366 |
| Tbg972.11.11150 | <i>T. brucei</i> | 90  | 1   | 90  |
| Tbg972.11.11160 | <i>T. brucei</i> | 65  | 50  | 114 |

|                 |                  |     |      |      |
|-----------------|------------------|-----|------|------|
| Tbg972.11.11160 | <i>T. brucei</i> | 69  | 118  | 186  |
| Tbg972.11.11160 | <i>T. brucei</i> | 69  | 118  | 186  |
| Tbg972.11.11170 | <i>T. brucei</i> | 172 | 1    | 172  |
| Tbg972.11.11170 | <i>T. brucei</i> | 146 | 194  | 339  |
| Tbg972.11.11180 | <i>T. brucei</i> | 98  | 197  | 294  |
| Tbg972.11.11190 | <i>T. brucei</i> | 187 | 1    | 187  |
| Tbg972.11.11200 | <i>T. brucei</i> | 42  | 135  | 176  |
| Tbg972.11.11230 | <i>T. brucei</i> | 219 | 1    | 219  |
| Tbg972.11.11290 | <i>T. brucei</i> | 52  | 1    | 52   |
| Tbg972.11.1130  | <i>T. brucei</i> | 116 | 1    | 116  |
| Tbg972.11.11320 | <i>T. brucei</i> | 96  | 1    | 96   |
| Tbg972.11.11340 | <i>T. brucei</i> | 118 | 1    | 118  |
| Tbg972.11.11340 | <i>T. brucei</i> | 45  | 276  | 320  |
| Tbg972.11.11370 | <i>T. brucei</i> | 209 | 114  | 322  |
| Tbg972.11.11370 | <i>T. brucei</i> | 309 | 507  | 815  |
| Tbg972.11.11370 | <i>T. brucei</i> | 45  | 821  | 865  |
| Tbg972.11.11380 | <i>T. brucei</i> | 201 | 124  | 324  |
| Tbg972.11.1140  | <i>T. brucei</i> | 43  | 1    | 43   |
| Tbg972.11.1140  | <i>T. brucei</i> | 47  | 208  | 254  |
| Tbg972.11.1140  | <i>T. brucei</i> | 193 | 266  | 458  |
| Tbg972.11.11400 | <i>T. brucei</i> | 45  | 1    | 45   |
| Tbg972.11.11400 | <i>T. brucei</i> | 53  | 152  | 204  |
| Tbg972.11.11400 | <i>T. brucei</i> | 53  | 254  | 306  |
| Tbg972.11.11400 | <i>T. brucei</i> | 42  | 783  | 824  |
| Tbg972.11.11400 | <i>T. brucei</i> | 41  | 924  | 964  |
| Tbg972.11.11400 | <i>T. brucei</i> | 48  | 1084 | 1131 |
| Tbg972.11.11420 | <i>T. brucei</i> | 58  | 115  | 172  |
| Tbg972.11.11430 | <i>T. brucei</i> | 47  | 184  | 230  |
| Tbg972.11.11440 | <i>T. brucei</i> | 73  | 34   | 106  |
| Tbg972.11.11440 | <i>T. brucei</i> | 70  | 527  | 596  |
| Tbg972.11.11440 | <i>T. brucei</i> | 70  | 527  | 596  |
| Tbg972.11.11450 | <i>T. brucei</i> | 214 | 1    | 214  |
| Tbg972.11.11450 | <i>T. brucei</i> | 95  | 299  | 393  |
| Tbg972.11.11460 | <i>T. brucei</i> | 52  | 1    | 52   |
| Tbg972.11.11460 | <i>T. brucei</i> | 71  | 248  | 318  |
| Tbg972.11.11460 | <i>T. brucei</i> | 155 | 564  | 718  |
| Tbg972.11.11460 | <i>T. brucei</i> | 81  | 755  | 835  |
| Tbg972.11.11480 | <i>T. brucei</i> | 61  | 1    | 61   |
| Tbg972.11.11480 | <i>T. brucei</i> | 55  | 122  | 176  |
| Tbg972.11.11480 | <i>T. brucei</i> | 55  | 122  | 176  |
| Tbg972.11.11520 | <i>T. brucei</i> | 79  | 269  | 347  |
| Tbg972.11.11530 | <i>T. brucei</i> | 110 | 35   | 144  |
| Tbg972.11.11530 | <i>T. brucei</i> | 44  | 175  | 218  |
| Tbg972.11.11530 | <i>T. brucei</i> | 44  | 175  | 218  |
| Tbg972.11.11550 | <i>T. brucei</i> | 127 | 1    | 127  |
| Tbg972.11.11550 | <i>T. brucei</i> | 237 | 135  | 371  |
| Tbg972.11.11550 | <i>T. brucei</i> | 54  | 437  | 490  |

|                 |                  |     |      |      |
|-----------------|------------------|-----|------|------|
| Tbg972.11.11550 | <i>T. brucei</i> | 60  | 776  | 835  |
| Tbg972.11.11550 | <i>T. brucei</i> | 58  | 1054 | 1111 |
| Tbg972.11.11570 | <i>T. brucei</i> | 64  | 1    | 64   |
| Tbg972.11.11570 | <i>T. brucei</i> | 166 | 242  | 407  |
| Tbg972.11.11580 | <i>T. brucei</i> | 44  | 1    | 44   |
| Tbg972.11.11580 | <i>T. brucei</i> | 47  | 110  | 156  |
| Tbg972.11.11580 | <i>T. brucei</i> | 47  | 110  | 156  |
| Tbg972.11.11590 | <i>T. brucei</i> | 46  | 546  | 591  |
| Tbg972.11.1160  | <i>T. brucei</i> | 92  | 454  | 545  |
| Tbg972.11.11610 | <i>T. brucei</i> | 57  | 201  | 257  |
| Tbg972.11.11620 | <i>T. brucei</i> | 245 | 180  | 424  |
| Tbg972.11.11630 | <i>T. brucei</i> | 85  | 133  | 217  |
| Tbg972.11.11650 | <i>T. brucei</i> | 92  | 1    | 92   |
| Tbg972.11.11650 | <i>T. brucei</i> | 44  | 430  | 473  |
| Tbg972.11.11650 | <i>T. brucei</i> | 44  | 430  | 473  |
| Tbg972.11.11660 | <i>T. brucei</i> | 44  | 1    | 44   |
| Tbg972.11.11680 | <i>T. brucei</i> | 42  | 1    | 42   |
| Tbg972.11.11690 | <i>T. brucei</i> | 40  | 198  | 237  |
| Tbg972.11.11690 | <i>T. brucei</i> | 65  | 261  | 325  |
| Tbg972.11.11690 | <i>T. brucei</i> | 237 | 332  | 568  |
| Tbg972.11.1170  | <i>T. brucei</i> | 174 | 1215 | 1388 |
| Tbg972.11.1170  | <i>T. brucei</i> | 58  | 1408 | 1465 |
| Tbg972.11.1170  | <i>T. brucei</i> | 333 | 1538 | 1870 |
| Tbg972.11.11700 | <i>T. brucei</i> | 120 | 1    | 120  |
| Tbg972.11.11700 | <i>T. brucei</i> | 93  | 150  | 242  |
| Tbg972.11.11730 | <i>T. brucei</i> | 112 | 199  | 310  |
| Tbg972.11.11740 | <i>T. brucei</i> | 40  | 86   | 125  |
| Tbg972.11.11740 | <i>T. brucei</i> | 130 | 248  | 377  |
| Tbg972.11.11750 | <i>T. brucei</i> | 73  | 800  | 872  |
| Tbg972.11.11750 | <i>T. brucei</i> | 41  | 919  | 959  |
| Tbg972.11.11760 | <i>T. brucei</i> | 80  | 69   | 148  |
| Tbg972.11.11760 | <i>T. brucei</i> | 70  | 270  | 339  |
| Tbg972.11.11760 | <i>T. brucei</i> | 194 | 416  | 609  |
| Tbg972.11.11770 | <i>T. brucei</i> | 99  | 397  | 495  |
| Tbg972.11.11790 | <i>T. brucei</i> | 89  | 1    | 89   |
| Tbg972.11.11790 | <i>T. brucei</i> | 378 | 643  | 1020 |
| Tbg972.11.1180  | <i>T. brucei</i> | 313 | 1    | 313  |
| Tbg972.11.1180  | <i>T. brucei</i> | 92  | 488  | 579  |
| Tbg972.11.1180  | <i>T. brucei</i> | 92  | 1140 | 1231 |
| Tbg972.11.11800 | <i>T. brucei</i> | 168 | 1    | 168  |
| Tbg972.11.11810 | <i>T. brucei</i> | 299 | 1    | 299  |
| Tbg972.11.11810 | <i>T. brucei</i> | 159 | 329  | 487  |
| Tbg972.11.11810 | <i>T. brucei</i> | 131 | 501  | 631  |
| Tbg972.11.11810 | <i>T. brucei</i> | 42  | 669  | 710  |
| Tbg972.11.11820 | <i>T. brucei</i> | 41  | 36   | 76   |
| Tbg972.11.11830 | <i>T. brucei</i> | 46  | 133  | 178  |
| Tbg972.11.11830 | <i>T. brucei</i> | 40  | 218  | 257  |

|                 |                  |     |      |      |
|-----------------|------------------|-----|------|------|
| Tbg972.11.11830 | <i>T. brucei</i> | 85  | 695  | 779  |
| Tbg972.11.11840 | <i>T. brucei</i> | 190 | 290  | 479  |
| Tbg972.11.11870 | <i>T. brucei</i> | 61  | 235  | 295  |
| Tbg972.11.11870 | <i>T. brucei</i> | 62  | 752  | 813  |
| Tbg972.11.11880 | <i>T. brucei</i> | 125 | 393  | 517  |
| Tbg972.11.11890 | <i>T. brucei</i> | 72  | 8    | 79   |
| Tbg972.11.11890 | <i>T. brucei</i> | 43  | 133  | 175  |
| Tbg972.11.11890 | <i>T. brucei</i> | 44  | 319  | 362  |
| Tbg972.11.1190  | <i>T. brucei</i> | 53  | 1217 | 1269 |
| Tbg972.11.1190  | <i>T. brucei</i> | 115 | 1360 | 1474 |
| Tbg972.11.1190  | <i>T. brucei</i> | 61  | 1497 | 1557 |
| Tbg972.11.1190  | <i>T. brucei</i> | 114 | 1910 | 2023 |
| Tbg972.11.1190  | <i>T. brucei</i> | 53  | 2208 | 2260 |
| Tbg972.11.1190  | <i>T. brucei</i> | 68  | 2287 | 2354 |
| Tbg972.11.1190  | <i>T. brucei</i> | 53  | 2451 | 2503 |
| Tbg972.11.1190  | <i>T. brucei</i> | 45  | 2578 | 2622 |
| Tbg972.11.1190  | <i>T. brucei</i> | 182 | 2718 | 2899 |
| Tbg972.11.1190  | <i>T. brucei</i> | 40  | 3002 | 3041 |
| Tbg972.11.1190  | <i>T. brucei</i> | 46  | 3382 | 3427 |
| Tbg972.11.1190  | <i>T. brucei</i> | 45  | 3446 | 3490 |
| Tbg972.11.1190  | <i>T. brucei</i> | 77  | 3671 | 3747 |
| Tbg972.11.1190  | <i>T. brucei</i> | 45  | 3798 | 3842 |
| Tbg972.11.1190  | <i>T. brucei</i> | 106 | 4056 | 4161 |
| Tbg972.11.1190  | <i>T. brucei</i> | 51  | 4585 | 4635 |
| Tbg972.11.1190  | <i>T. brucei</i> | 86  | 4680 | 4765 |
| Tbg972.11.1190  | <i>T. brucei</i> | 70  | 4859 | 4928 |
| Tbg972.11.1190  | <i>T. brucei</i> | 75  | 4986 | 5060 |
| Tbg972.11.1190  | <i>T. brucei</i> | 99  | 5272 | 5370 |
| Tbg972.11.11900 | <i>T. brucei</i> | 96  | 53   | 148  |
| Tbg972.11.11900 | <i>T. brucei</i> | 47  | 516  | 562  |
| Tbg972.11.11900 | <i>T. brucei</i> | 47  | 516  | 562  |
| Tbg972.11.11910 | <i>T. brucei</i> | 157 | 1    | 157  |
| Tbg972.11.11920 | <i>T. brucei</i> | 58  | 99   | 156  |
| Tbg972.11.11940 | <i>T. brucei</i> | 74  | 266  | 339  |
| Tbg972.11.11940 | <i>T. brucei</i> | 222 | 698  | 919  |
| Tbg972.11.11950 | <i>T. brucei</i> | 41  | 79   | 119  |
| Tbg972.11.11950 | <i>T. brucei</i> | 41  | 174  | 214  |
| Tbg972.11.11950 | <i>T. brucei</i> | 58  | 309  | 366  |
| Tbg972.11.11950 | <i>T. brucei</i> | 65  | 402  | 466  |
| Tbg972.11.11950 | <i>T. brucei</i> | 59  | 593  | 651  |
| Tbg972.11.11950 | <i>T. brucei</i> | 81  | 813  | 893  |
| Tbg972.11.11950 | <i>T. brucei</i> | 110 | 921  | 1030 |
| Tbg972.11.11950 | <i>T. brucei</i> | 150 | 1050 | 1199 |
| Tbg972.11.11950 | <i>T. brucei</i> | 155 | 1213 | 1367 |
| Tbg972.11.11950 | <i>T. brucei</i> | 155 | 1381 | 1535 |
| Tbg972.11.11950 | <i>T. brucei</i> | 155 | 1549 | 1703 |
| Tbg972.11.11950 | <i>T. brucei</i> | 155 | 1717 | 1871 |

|                 |                  |     |      |      |
|-----------------|------------------|-----|------|------|
| Tbg972.11.11950 | <i>T. brucei</i> | 153 | 1885 | 2037 |
| Tbg972.11.11950 | <i>T. brucei</i> | 93  | 2087 | 2179 |
| Tbg972.11.11950 | <i>T. brucei</i> | 63  | 2286 | 2348 |
| Tbg972.11.11950 | <i>T. brucei</i> | 68  | 2368 | 2435 |
| Tbg972.11.11950 | <i>T. brucei</i> | 109 | 2612 | 2720 |
| Tbg972.11.11950 | <i>T. brucei</i> | 93  | 2821 | 2913 |
| Tbg972.11.11950 | <i>T. brucei</i> | 140 | 2964 | 3103 |
| Tbg972.11.11950 | <i>T. brucei</i> | 54  | 3363 | 3416 |
| Tbg972.11.11950 | <i>T. brucei</i> | 102 | 3427 | 3528 |
| Tbg972.11.11950 | <i>T. brucei</i> | 273 | 3618 | 3890 |
| Tbg972.11.11950 | <i>T. brucei</i> | 58  | 3934 | 3991 |
| Tbg972.11.11950 | <i>T. brucei</i> | 45  | 4235 | 4279 |
| Tbg972.11.11950 | <i>T. brucei</i> | 74  | 4310 | 4383 |
| Tbg972.11.11970 | <i>T. brucei</i> | 41  | 98   | 138  |
| Tbg972.11.11970 | <i>T. brucei</i> | 51  | 338  | 388  |
| Tbg972.11.11970 | <i>T. brucei</i> | 51  | 338  | 388  |
| Tbg972.11.11980 | <i>T. brucei</i> | 55  | 308  | 362  |
| Tbg972.11.12000 | <i>T. brucei</i> | 40  | 467  | 506  |
| Tbg972.11.12020 | <i>T. brucei</i> | 66  | 78   | 143  |
| Tbg972.11.12020 | <i>T. brucei</i> | 52  | 152  | 203  |
| Tbg972.11.12020 | <i>T. brucei</i> | 135 | 1028 | 1162 |
| Tbg972.11.12040 | <i>T. brucei</i> | 66  | 295  | 360  |
| Tbg972.11.12040 | <i>T. brucei</i> | 79  | 503  | 581  |
| Tbg972.11.12040 | <i>T. brucei</i> | 79  | 503  | 581  |
| Tbg972.11.12050 | <i>T. brucei</i> | 74  | 340  | 413  |
| Tbg972.11.12050 | <i>T. brucei</i> | 172 | 446  | 617  |
| Tbg972.11.12050 | <i>T. brucei</i> | 172 | 446  | 617  |
| Tbg972.11.12060 | <i>T. brucei</i> | 62  | 17   | 78   |
| Tbg972.11.12060 | <i>T. brucei</i> | 40  | 206  | 245  |
| Tbg972.11.12060 | <i>T. brucei</i> | 198 | 297  | 494  |
| Tbg972.11.12100 | <i>T. brucei</i> | 52  | 147  | 198  |
| Tbg972.11.12110 | <i>T. brucei</i> | 49  | 214  | 262  |
| Tbg972.11.12120 | <i>T. brucei</i> | 90  | 141  | 230  |
| Tbg972.11.12120 | <i>T. brucei</i> | 44  | 580  | 623  |
| Tbg972.11.12130 | <i>T. brucei</i> | 77  | 218  | 294  |
| Tbg972.11.12140 | <i>T. brucei</i> | 58  | 1    | 58   |
| Tbg972.11.12150 | <i>T. brucei</i> | 80  | 1    | 80   |
| Tbg972.11.12150 | <i>T. brucei</i> | 89  | 180  | 268  |
| Tbg972.11.12150 | <i>T. brucei</i> | 48  | 452  | 499  |
| Tbg972.11.12170 | <i>T. brucei</i> | 50  | 1    | 50   |
| Tbg972.11.12170 | <i>T. brucei</i> | 56  | 169  | 224  |
| Tbg972.11.12170 | <i>T. brucei</i> | 64  | 369  | 432  |
| Tbg972.11.1220  | <i>T. brucei</i> | 109 | 55   | 163  |
| Tbg972.11.1220  | <i>T. brucei</i> | 74  | 191  | 264  |
| Tbg972.11.12200 | <i>T. brucei</i> | 52  | 1    | 52   |
| Tbg972.11.12200 | <i>T. brucei</i> | 150 | 125  | 274  |
| Tbg972.11.12200 | <i>T. brucei</i> | 150 | 125  | 274  |



|                 |                  |      |      |      |
|-----------------|------------------|------|------|------|
| Tbg972.11.12210 | <i>T. brucei</i> | 43   | 1    | 43   |
| Tbg972.11.12210 | <i>T. brucei</i> | 515  | 47   | 561  |
| Tbg972.11.12210 | <i>T. brucei</i> | 146  | 639  | 784  |
| Tbg972.11.12210 | <i>T. brucei</i> | 61   | 788  | 848  |
| Tbg972.11.12230 | <i>T. brucei</i> | 52   | 147  | 198  |
| Tbg972.11.12240 | <i>T. brucei</i> | 56   | 29   | 84   |
| Tbg972.11.12250 | <i>T. brucei</i> | 58   | 44   | 101  |
| Tbg972.11.12250 | <i>T. brucei</i> | 46   | 180  | 225  |
| Tbg972.11.12250 | <i>T. brucei</i> | 46   | 180  | 225  |
| Tbg972.11.12260 | <i>T. brucei</i> | 102  | 65   | 166  |
| Tbg972.11.12260 | <i>T. brucei</i> | 68   | 207  | 274  |
| Tbg972.11.12270 | <i>T. brucei</i> | 47   | 274  | 320  |
| Tbg972.11.12270 | <i>T. brucei</i> | 82   | 545  | 626  |
| Tbg972.11.12270 | <i>T. brucei</i> | 78   | 658  | 735  |
| Tbg972.11.12270 | <i>T. brucei</i> | 190  | 766  | 955  |
| Tbg972.11.12270 | <i>T. brucei</i> | 181  | 986  | 1166 |
| Tbg972.11.12270 | <i>T. brucei</i> | 71   | 1206 | 1276 |
| Tbg972.11.12270 | <i>T. brucei</i> | 45   | 1587 | 1631 |
| Tbg972.11.12270 | <i>T. brucei</i> | 92   | 2108 | 2199 |
| Tbg972.11.12270 | <i>T. brucei</i> | 74   | 2354 | 2427 |
| Tbg972.11.12280 | <i>T. brucei</i> | 59   | 1    | 59   |
| Tbg972.11.12280 | <i>T. brucei</i> | 80   | 244  | 323  |
| Tbg972.11.12280 | <i>T. brucei</i> | 63   | 531  | 593  |
| Tbg972.11.1230  | <i>T. brucei</i> | 41   | 851  | 891  |
| Tbg972.11.12300 | <i>T. brucei</i> | 50   | 7    | 56   |
| Tbg972.11.12330 | <i>T. brucei</i> | 78   | 1    | 78   |
| Tbg972.11.12330 | <i>T. brucei</i> | 187  | 215  | 401  |
| Tbg972.11.12340 | <i>T. brucei</i> | 348  | 1    | 348  |
| Tbg972.11.12350 | <i>T. brucei</i> | 75   | 33   | 107  |
| Tbg972.11.12350 | <i>T. brucei</i> | 102  | 140  | 241  |
| Tbg972.11.12350 | <i>T. brucei</i> | 42   | 1284 | 1325 |
| Tbg972.11.12350 | <i>T. brucei</i> | 44   | 1370 | 1413 |
| Tbg972.11.12350 | <i>T. brucei</i> | 74   | 1564 | 1637 |
| Tbg972.11.12370 | <i>T. brucei</i> | 57   | 208  | 264  |
| Tbg972.11.12390 | <i>T. brucei</i> | 50   | 95   | 144  |
| Tbg972.11.1240  | <i>T. brucei</i> | 57   | 43   | 99   |
| Tbg972.11.1240  | <i>T. brucei</i> | 46   | 250  | 295  |
| Tbg972.11.1240  | <i>T. brucei</i> | 82   | 585  | 666  |
| Tbg972.11.12400 | <i>T. brucei</i> | 40   | 56   | 95   |
| Tbg972.11.12400 | <i>T. brucei</i> | 206  | 185  | 390  |
| Tbg972.11.12400 | <i>T. brucei</i> | 40   | 456  | 495  |
| Tbg972.11.12400 | <i>T. brucei</i> | 403  | 585  | 987  |
| Tbg972.11.12410 | <i>T. brucei</i> | 1051 | 132  | 1182 |
| Tbg972.11.12410 | <i>T. brucei</i> | 52   | 1209 | 1260 |
| Tbg972.11.12430 | <i>T. brucei</i> | 48   | 213  | 260  |
| Tbg972.11.12440 | <i>T. brucei</i> | 95   | 49   | 143  |
| Tbg972.11.12440 | <i>T. brucei</i> | 50   | 149  | 198  |

|                 |                  |     |      |      |
|-----------------|------------------|-----|------|------|
| Tbg972.11.12440 | <i>T. brucei</i> | 50  | 149  | 198  |
| Tbg972.11.12460 | <i>T. brucei</i> | 85  | 1    | 85   |
| Tbg972.11.12470 | <i>T. brucei</i> | 68  | 616  | 683  |
| Tbg972.11.12470 | <i>T. brucei</i> | 186 | 807  | 992  |
| Tbg972.11.12490 | <i>T. brucei</i> | 66  | 67   | 132  |
| Tbg972.11.12510 | <i>T. brucei</i> | 55  | 81   | 135  |
| Tbg972.11.12510 | <i>T. brucei</i> | 61  | 236  | 296  |
| Tbg972.11.12510 | <i>T. brucei</i> | 61  | 236  | 296  |
| Tbg972.11.12530 | <i>T. brucei</i> | 63  | 76   | 138  |
| Tbg972.11.12540 | <i>T. brucei</i> | 145 | 62   | 206  |
| Tbg972.11.12540 | <i>T. brucei</i> | 103 | 2747 | 2849 |
| Tbg972.11.12540 | <i>T. brucei</i> | 82  | 2966 | 3047 |
| Tbg972.11.12540 | <i>T. brucei</i> | 71  | 3309 | 3379 |
| Tbg972.11.12540 | <i>T. brucei</i> | 58  | 3942 | 3999 |
| Tbg972.11.12550 | <i>T. brucei</i> | 59  | 131  | 189  |
| Tbg972.11.12590 | <i>T. brucei</i> | 41  | 337  | 377  |
| Tbg972.11.1260  | <i>T. brucei</i> | 294 | 137  | 430  |
| Tbg972.11.12600 | <i>T. brucei</i> | 270 | 300  | 569  |
| Tbg972.11.12610 | <i>T. brucei</i> | 66  | 132  | 197  |
| Tbg972.11.12610 | <i>T. brucei</i> | 52  | 634  | 685  |
| Tbg972.11.12610 | <i>T. brucei</i> | 50  | 721  | 770  |
| Tbg972.11.12620 | <i>T. brucei</i> | 71  | 606  | 676  |
| Tbg972.11.12630 | <i>T. brucei</i> | 91  | 1    | 91   |
| Tbg972.11.12640 | <i>T. brucei</i> | 48  | 1    | 48   |
| Tbg972.11.12640 | <i>T. brucei</i> | 44  | 455  | 498  |
| Tbg972.11.12640 | <i>T. brucei</i> | 44  | 455  | 498  |
| Tbg972.11.12650 | <i>T. brucei</i> | 123 | 94   | 216  |
| Tbg972.11.12660 | <i>T. brucei</i> | 40  | 419  | 458  |
| Tbg972.11.12660 | <i>T. brucei</i> | 53  | 520  | 572  |
| Tbg972.11.12670 | <i>T. brucei</i> | 85  | 73   | 157  |
| Tbg972.11.12690 | <i>T. brucei</i> | 41  | 25   | 65   |
| Tbg972.11.12700 | <i>T. brucei</i> | 89  | 462  | 550  |
| Tbg972.11.12720 | <i>T. brucei</i> | 109 | 1    | 109  |
| Tbg972.11.12760 | <i>T. brucei</i> | 48  | 97   | 144  |
| Tbg972.11.12790 | <i>T. brucei</i> | 53  | 57   | 109  |
| Tbg972.11.1280  | <i>T. brucei</i> | 65  | 40   | 104  |
| Tbg972.11.12830 | <i>T. brucei</i> | 76  | 379  | 454  |
| Tbg972.11.12840 | <i>T. brucei</i> | 63  | 43   | 105  |
| Tbg972.11.12840 | <i>T. brucei</i> | 90  | 503  | 592  |
| Tbg972.11.12840 | <i>T. brucei</i> | 49  | 666  | 714  |
| Tbg972.11.12850 | <i>T. brucei</i> | 132 | 162  | 293  |
| Tbg972.11.12850 | <i>T. brucei</i> | 52  | 316  | 367  |
| Tbg972.11.12850 | <i>T. brucei</i> | 74  | 552  | 625  |
| Tbg972.11.12860 | <i>T. brucei</i> | 46  | 21   | 66   |
| Tbg972.11.12890 | <i>T. brucei</i> | 546 | 1    | 546  |
| Tbg972.11.12890 | <i>T. brucei</i> | 100 | 559  | 658  |
| Tbg972.11.1290  | <i>T. brucei</i> | 147 | 24   | 170  |

|                 |                  |      |      |      |
|-----------------|------------------|------|------|------|
| Tbg972.11.1290  | <i>T. brucei</i> | 46   | 178  | 223  |
| Tbg972.11.1290  | <i>T. brucei</i> | 83   | 304  | 386  |
| Tbg972.11.1290  | <i>T. brucei</i> | 257  | 481  | 737  |
| Tbg972.11.12920 | <i>T. brucei</i> | 133  | 1    | 133  |
| Tbg972.11.12920 | <i>T. brucei</i> | 87   | 147  | 233  |
| Tbg972.11.12920 | <i>T. brucei</i> | 78   | 269  | 346  |
| Tbg972.11.12960 | <i>T. brucei</i> | 72   | 1038 | 1109 |
| Tbg972.11.12960 | <i>T. brucei</i> | 315  | 1141 | 1455 |
| Tbg972.11.12970 | <i>T. brucei</i> | 73   | 1204 | 1276 |
| Tbg972.11.12970 | <i>T. brucei</i> | 86   | 1300 | 1385 |
| Tbg972.11.12970 | <i>T. brucei</i> | 49   | 1389 | 1437 |
| Tbg972.11.12980 | <i>T. brucei</i> | 85   | 198  | 282  |
| Tbg972.11.12980 | <i>T. brucei</i> | 47   | 568  | 614  |
| Tbg972.11.12980 | <i>T. brucei</i> | 47   | 568  | 614  |
| Tbg972.11.12990 | <i>T. brucei</i> | 177  | 1    | 177  |
| Tbg972.11.12990 | <i>T. brucei</i> | 87   | 216  | 302  |
| Tbg972.11.12990 | <i>T. brucei</i> | 47   | 335  | 381  |
| Tbg972.11.130   | <i>T. brucei</i> | 47   | 691  | 737  |
| Tbg972.11.1300  | <i>T. brucei</i> | 135  | 1    | 135  |
| Tbg972.11.1300  | <i>T. brucei</i> | 235  | 144  | 378  |
| Tbg972.11.13010 | <i>T. brucei</i> | 122  | 144  | 265  |
| Tbg972.11.13010 | <i>T. brucei</i> | 1228 | 293  | 1520 |
| Tbg972.11.13020 | <i>T. brucei</i> | 68   | 228  | 295  |
| Tbg972.11.13020 | <i>T. brucei</i> | 41   | 347  | 387  |
| Tbg972.11.13020 | <i>T. brucei</i> | 47   | 408  | 454  |
| Tbg972.11.13050 | <i>T. brucei</i> | 85   | 13   | 97   |
| Tbg972.11.13060 | <i>T. brucei</i> | 41   | 187  | 227  |
| Tbg972.11.13060 | <i>T. brucei</i> | 77   | 695  | 771  |
| Tbg972.11.13070 | <i>T. brucei</i> | 650  | 100  | 749  |
| Tbg972.11.13070 | <i>T. brucei</i> | 58   | 790  | 847  |
| Tbg972.11.13070 | <i>T. brucei</i> | 73   | 923  | 995  |
| Tbg972.11.13100 | <i>T. brucei</i> | 81   | 92   | 172  |
| Tbg972.11.13130 | <i>T. brucei</i> | 49   | 168  | 216  |
| Tbg972.11.13130 | <i>T. brucei</i> | 43   | 219  | 261  |
| Tbg972.11.13130 | <i>T. brucei</i> | 43   | 219  | 261  |
| Tbg972.11.1320  | <i>T. brucei</i> | 56   | 1    | 56   |
| Tbg972.11.13200 | <i>T. brucei</i> | 61   | 53   | 113  |
| Tbg972.11.13200 | <i>T. brucei</i> | 105  | 190  | 294  |
| Tbg972.11.13200 | <i>T. brucei</i> | 105  | 190  | 294  |
| Tbg972.11.13210 | <i>T. brucei</i> | 211  | 1    | 211  |
| Tbg972.11.13250 | <i>T. brucei</i> | 46   | 1    | 46   |
| Tbg972.11.13250 | <i>T. brucei</i> | 42   | 144  | 185  |
| Tbg972.11.13250 | <i>T. brucei</i> | 57   | 223  | 279  |
| Tbg972.11.13250 | <i>T. brucei</i> | 50   | 324  | 373  |
| Tbg972.11.13270 | <i>T. brucei</i> | 156  | 26   | 181  |
| Tbg972.11.13270 | <i>T. brucei</i> | 158  | 187  | 344  |
| Tbg972.11.1330  | <i>T. brucei</i> | 91   | 1    | 91   |

|                 |                  |     |      |      |
|-----------------|------------------|-----|------|------|
| Tbg972.11.1330  | <i>T. brucei</i> | 57  | 424  | 480  |
| Tbg972.11.1330  | <i>T. brucei</i> | 57  | 424  | 480  |
| Tbg972.11.13310 | <i>T. brucei</i> | 152 | 1    | 152  |
| Tbg972.11.13320 | <i>T. brucei</i> | 77  | 351  | 427  |
| Tbg972.11.13320 | <i>T. brucei</i> | 100 | 616  | 715  |
| Tbg972.11.13320 | <i>T. brucei</i> | 100 | 616  | 715  |
| Tbg972.11.13340 | <i>T. brucei</i> | 84  | 1    | 84   |
| Tbg972.11.13340 | <i>T. brucei</i> | 88  | 362  | 449  |
| Tbg972.11.13340 | <i>T. brucei</i> | 153 | 1143 | 1295 |
| Tbg972.11.13350 | <i>T. brucei</i> | 79  | 568  | 646  |
| Tbg972.11.13370 | <i>T. brucei</i> | 181 | 1    | 181  |
| Tbg972.11.13380 | <i>T. brucei</i> | 110 | 1    | 110  |
| Tbg972.11.13380 | <i>T. brucei</i> | 44  | 143  | 186  |
| Tbg972.11.13380 | <i>T. brucei</i> | 225 | 330  | 554  |
| Tbg972.11.13380 | <i>T. brucei</i> | 214 | 562  | 775  |
| Tbg972.11.13420 | <i>T. brucei</i> | 45  | 277  | 321  |
| Tbg972.11.13430 | <i>T. brucei</i> | 42  | 18   | 59   |
| Tbg972.11.13460 | <i>T. brucei</i> | 205 | 1    | 205  |
| Tbg972.11.1350  | <i>T. brucei</i> | 140 | 1    | 140  |
| Tbg972.11.13510 | <i>T. brucei</i> | 188 | 81   | 268  |
| Tbg972.11.13510 | <i>T. brucei</i> | 79  | 296  | 374  |
| Tbg972.11.13510 | <i>T. brucei</i> | 79  | 296  | 374  |
| Tbg972.11.13550 | <i>T. brucei</i> | 48  | 1    | 48   |
| Tbg972.11.13550 | <i>T. brucei</i> | 110 | 303  | 412  |
| Tbg972.11.13550 | <i>T. brucei</i> | 49  | 1204 | 1252 |
| Tbg972.11.13560 | <i>T. brucei</i> | 123 | 95   | 217  |
| Tbg972.11.13590 | <i>T. brucei</i> | 41  | 22   | 62   |
| Tbg972.11.13590 | <i>T. brucei</i> | 91  | 93   | 183  |
| Tbg972.11.13590 | <i>T. brucei</i> | 322 | 266  | 587  |
| Tbg972.11.1360  | <i>T. brucei</i> | 65  | 43   | 107  |
| Tbg972.11.13610 | <i>T. brucei</i> | 242 | 17   | 258  |
| Tbg972.11.13610 | <i>T. brucei</i> | 299 | 290  | 588  |
| Tbg972.11.13620 | <i>T. brucei</i> | 59  | 106  | 164  |
| Tbg972.11.13620 | <i>T. brucei</i> | 60  | 380  | 439  |
| Tbg972.11.13620 | <i>T. brucei</i> | 99  | 442  | 540  |
| Tbg972.11.13620 | <i>T. brucei</i> | 231 | 549  | 779  |
| Tbg972.11.13620 | <i>T. brucei</i> | 52  | 794  | 845  |
| Tbg972.11.13620 | <i>T. brucei</i> | 55  | 862  | 916  |
| Tbg972.11.13630 | <i>T. brucei</i> | 64  | 132  | 195  |
| Tbg972.11.13630 | <i>T. brucei</i> | 132 | 262  | 393  |
| Tbg972.11.13630 | <i>T. brucei</i> | 132 | 262  | 393  |
| Tbg972.11.13650 | <i>T. brucei</i> | 93  | 53   | 145  |
| Tbg972.11.13650 | <i>T. brucei</i> | 74  | 191  | 264  |
| Tbg972.11.13660 | <i>T. brucei</i> | 43  | 68   | 110  |
| Tbg972.11.13660 | <i>T. brucei</i> | 48  | 318  | 365  |
| Tbg972.11.13660 | <i>T. brucei</i> | 48  | 318  | 365  |
| Tbg972.11.13670 | <i>T. brucei</i> | 58  | 165  | 222  |

|                 |                  |     |      |      |
|-----------------|------------------|-----|------|------|
| Tbg972.11.13680 | <i>T. brucei</i> | 65  | 188  | 252  |
| Tbg972.11.13680 | <i>T. brucei</i> | 40  | 325  | 364  |
| Tbg972.11.13680 | <i>T. brucei</i> | 50  | 506  | 555  |
| Tbg972.11.13680 | <i>T. brucei</i> | 53  | 623  | 675  |
| Tbg972.11.13680 | <i>T. brucei</i> | 45  | 701  | 745  |
| Tbg972.11.13690 | <i>T. brucei</i> | 57  | 567  | 623  |
| Tbg972.11.1370  | <i>T. brucei</i> | 102 | 102  | 203  |
| Tbg972.11.1370  | <i>T. brucei</i> | 120 | 223  | 342  |
| Tbg972.11.13700 | <i>T. brucei</i> | 67  | 72   | 138  |
| Tbg972.11.13700 | <i>T. brucei</i> | 65  | 314  | 378  |
| Tbg972.11.13700 | <i>T. brucei</i> | 57  | 388  | 444  |
| Tbg972.11.13720 | <i>T. brucei</i> | 249 | 13   | 261  |
| Tbg972.11.13720 | <i>T. brucei</i> | 58  | 367  | 424  |
| Tbg972.11.13730 | <i>T. brucei</i> | 50  | 30   | 79   |
| Tbg972.11.13730 | <i>T. brucei</i> | 91  | 145  | 235  |
| Tbg972.11.13730 | <i>T. brucei</i> | 83  | 358  | 440  |
| Tbg972.11.13740 | <i>T. brucei</i> | 61  | 98   | 158  |
| Tbg972.11.13750 | <i>T. brucei</i> | 198 | 112  | 309  |
| Tbg972.11.13750 | <i>T. brucei</i> | 43  | 560  | 602  |
| Tbg972.11.13760 | <i>T. brucei</i> | 93  | 552  | 644  |
| Tbg972.11.13780 | <i>T. brucei</i> | 94  | 1    | 94   |
| Tbg972.11.13780 | <i>T. brucei</i> | 47  | 122  | 168  |
| Tbg972.11.13780 | <i>T. brucei</i> | 54  | 199  | 252  |
| Tbg972.11.13790 | <i>T. brucei</i> | 61  | 86   | 146  |
| Tbg972.11.13790 | <i>T. brucei</i> | 43  | 510  | 552  |
| Tbg972.11.13790 | <i>T. brucei</i> | 43  | 510  | 552  |
| Tbg972.11.13810 | <i>T. brucei</i> | 126 | 48   | 173  |
| Tbg972.11.13820 | <i>T. brucei</i> | 188 | 227  | 414  |
| Tbg972.11.13830 | <i>T. brucei</i> | 101 | 45   | 145  |
| Tbg972.11.13830 | <i>T. brucei</i> | 51  | 191  | 241  |
| Tbg972.11.13830 | <i>T. brucei</i> | 47  | 303  | 349  |
| Tbg972.11.13830 | <i>T. brucei</i> | 46  | 352  | 397  |
| Tbg972.11.13830 | <i>T. brucei</i> | 56  | 646  | 701  |
| Tbg972.11.13830 | <i>T. brucei</i> | 68  | 803  | 870  |
| Tbg972.11.13830 | <i>T. brucei</i> | 110 | 881  | 990  |
| Tbg972.11.13830 | <i>T. brucei</i> | 51  | 1061 | 1111 |
| Tbg972.11.13840 | <i>T. brucei</i> | 49  | 154  | 202  |
| Tbg972.11.13840 | <i>T. brucei</i> | 80  | 232  | 311  |
| Tbg972.11.13850 | <i>T. brucei</i> | 43  | 114  | 156  |
| Tbg972.11.13870 | <i>T. brucei</i> | 108 | 1    | 108  |
| Tbg972.11.13890 | <i>T. brucei</i> | 56  | 1    | 56   |
| Tbg972.11.13890 | <i>T. brucei</i> | 91  | 79   | 169  |
| Tbg972.11.1390  | <i>T. brucei</i> | 47  | 1    | 47   |
| Tbg972.11.13900 | <i>T. brucei</i> | 44  | 35   | 78   |
| Tbg972.11.13900 | <i>T. brucei</i> | 48  | 403  | 450  |
| Tbg972.11.13900 | <i>T. brucei</i> | 198 | 538  | 735  |
| Tbg972.11.13910 | <i>T. brucei</i> | 144 | 172  | 315  |

|                 |                  |     |      |      |
|-----------------|------------------|-----|------|------|
| Tbg972.11.13920 | <i>T. brucei</i> | 84  | 139  | 222  |
| Tbg972.11.13930 | <i>T. brucei</i> | 54  | 170  | 223  |
| Tbg972.11.13930 | <i>T. brucei</i> | 70  | 293  | 362  |
| Tbg972.11.13930 | <i>T. brucei</i> | 111 | 439  | 549  |
| Tbg972.11.13930 | <i>T. brucei</i> | 112 | 595  | 706  |
| Tbg972.11.13930 | <i>T. brucei</i> | 95  | 741  | 835  |
| Tbg972.11.13930 | <i>T. brucei</i> | 171 | 856  | 1026 |
| Tbg972.11.13940 | <i>T. brucei</i> | 46  | 1    | 46   |
| Tbg972.11.13940 | <i>T. brucei</i> | 72  | 135  | 206  |
| Tbg972.11.13940 | <i>T. brucei</i> | 66  | 534  | 599  |
| Tbg972.11.13940 | <i>T. brucei</i> | 77  | 629  | 705  |
| Tbg972.11.13940 | <i>T. brucei</i> | 40  | 1109 | 1148 |
| Tbg972.11.13940 | <i>T. brucei</i> | 49  | 1635 | 1683 |
| Tbg972.11.13940 | <i>T. brucei</i> | 67  | 2012 | 2078 |
| Tbg972.11.13940 | <i>T. brucei</i> | 44  | 2113 | 2156 |
| Tbg972.11.13950 | <i>T. brucei</i> | 84  | 1    | 84   |
| Tbg972.11.13950 | <i>T. brucei</i> | 159 | 98   | 256  |
| Tbg972.11.13960 | <i>T. brucei</i> | 41  | 1    | 41   |
| Tbg972.11.13960 | <i>T. brucei</i> | 168 | 216  | 383  |
| Tbg972.11.13980 | <i>T. brucei</i> | 61  | 440  | 500  |
| Tbg972.11.13980 | <i>T. brucei</i> | 81  | 559  | 639  |
| Tbg972.11.13980 | <i>T. brucei</i> | 201 | 717  | 917  |
| Tbg972.11.13990 | <i>T. brucei</i> | 76  | 164  | 239  |
| Tbg972.11.14000 | <i>T. brucei</i> | 64  | 164  | 227  |
| Tbg972.11.14000 | <i>T. brucei</i> | 243 | 564  | 806  |
| Tbg972.11.14010 | <i>T. brucei</i> | 147 | 1    | 147  |
| Tbg972.11.14010 | <i>T. brucei</i> | 67  | 184  | 250  |
| Tbg972.11.14010 | <i>T. brucei</i> | 57  | 452  | 508  |
| Tbg972.11.14010 | <i>T. brucei</i> | 40  | 665  | 704  |
| Tbg972.11.14010 | <i>T. brucei</i> | 152 | 901  | 1052 |
| Tbg972.11.14020 | <i>T. brucei</i> | 196 | 1    | 196  |
| Tbg972.11.14020 | <i>T. brucei</i> | 113 | 262  | 374  |
| Tbg972.11.14020 | <i>T. brucei</i> | 85  | 405  | 489  |
| Tbg972.11.14020 | <i>T. brucei</i> | 279 | 506  | 784  |
| Tbg972.11.14040 | <i>T. brucei</i> | 62  | 148  | 209  |
| Tbg972.11.14040 | <i>T. brucei</i> | 81  | 313  | 393  |
| Tbg972.11.14080 | <i>T. brucei</i> | 59  | 57   | 115  |
| Tbg972.11.14080 | <i>T. brucei</i> | 66  | 307  | 372  |
| Tbg972.11.14080 | <i>T. brucei</i> | 40  | 629  | 668  |
| Tbg972.11.14090 | <i>T. brucei</i> | 44  | 98   | 141  |
| Tbg972.11.14090 | <i>T. brucei</i> | 50  | 178  | 227  |
| Tbg972.11.14090 | <i>T. brucei</i> | 50  | 178  | 227  |
| Tbg972.11.1410  | <i>T. brucei</i> | 298 | 627  | 924  |
| Tbg972.11.14100 | <i>T. brucei</i> | 64  | 220  | 283  |
| Tbg972.11.14100 | <i>T. brucei</i> | 474 | 501  | 974  |
| Tbg972.11.14110 | <i>T. brucei</i> | 57  | 143  | 199  |
| Tbg972.11.14120 | <i>T. brucei</i> | 78  | 581  | 658  |

|                 |                  |     |      |      |
|-----------------|------------------|-----|------|------|
| Tbg972.11.14120 | <i>T. brucei</i> | 109 | 678  | 786  |
| Tbg972.11.14120 | <i>T. brucei</i> | 109 | 678  | 786  |
| Tbg972.11.14130 | <i>T. brucei</i> | 86  | 1    | 86   |
| Tbg972.11.14140 | <i>T. brucei</i> | 51  | 95   | 145  |
| Tbg972.11.14150 | <i>T. brucei</i> | 64  | 254  | 317  |
| Tbg972.11.14190 | <i>T. brucei</i> | 45  | 45   | 89   |
| Tbg972.11.14190 | <i>T. brucei</i> | 123 | 287  | 409  |
| Tbg972.11.14210 | <i>T. brucei</i> | 492 | 1    | 492  |
| Tbg972.11.14220 | <i>T. brucei</i> | 59  | 56   | 114  |
| Tbg972.11.14230 | <i>T. brucei</i> | 60  | 20   | 79   |
| Tbg972.11.14230 | <i>T. brucei</i> | 88  | 111  | 198  |
| Tbg972.11.14230 | <i>T. brucei</i> | 42  | 224  | 265  |
| Tbg972.11.14240 | <i>T. brucei</i> | 54  | 224  | 277  |
| Tbg972.11.14260 | <i>T. brucei</i> | 56  | 1155 | 1210 |
| Tbg972.11.14260 | <i>T. brucei</i> | 88  | 1345 | 1432 |
| Tbg972.11.14260 | <i>T. brucei</i> | 88  | 1345 | 1432 |
| Tbg972.11.1430  | <i>T. brucei</i> | 112 | 26   | 137  |
| Tbg972.11.1430  | <i>T. brucei</i> | 113 | 227  | 339  |
| Tbg972.11.1430  | <i>T. brucei</i> | 205 | 364  | 568  |
| Tbg972.11.14310 | <i>T. brucei</i> | 63  | 46   | 108  |
| Tbg972.11.14310 | <i>T. brucei</i> | 40  | 180  | 219  |
| Tbg972.11.14310 | <i>T. brucei</i> | 40  | 420  | 459  |
| Tbg972.11.14310 | <i>T. brucei</i> | 61  | 498  | 558  |
| Tbg972.11.14310 | <i>T. brucei</i> | 42  | 604  | 645  |
| Tbg972.11.14310 | <i>T. brucei</i> | 47  | 979  | 1025 |
| Tbg972.11.14310 | <i>T. brucei</i> | 54  | 1285 | 1338 |
| Tbg972.11.14310 | <i>T. brucei</i> | 74  | 1565 | 1638 |
| Tbg972.11.14310 | <i>T. brucei</i> | 55  | 1919 | 1973 |
| Tbg972.11.14310 | <i>T. brucei</i> | 73  | 2400 | 2472 |
| Tbg972.11.14310 | <i>T. brucei</i> | 65  | 2716 | 2780 |
| Tbg972.11.14310 | <i>T. brucei</i> | 127 | 2861 | 2987 |
| Tbg972.11.14310 | <i>T. brucei</i> | 40  | 3281 | 3320 |
| Tbg972.11.14310 | <i>T. brucei</i> | 69  | 3431 | 3499 |
| Tbg972.11.14310 | <i>T. brucei</i> | 72  | 3626 | 3697 |
| Tbg972.11.14310 | <i>T. brucei</i> | 92  | 3791 | 3882 |
| Tbg972.11.14320 | <i>T. brucei</i> | 42  | 1    | 42   |
| Tbg972.11.14350 | <i>T. brucei</i> | 49  | 117  | 165  |
| Tbg972.11.14350 | <i>T. brucei</i> | 777 | 433  | 1209 |
| Tbg972.11.14360 | <i>T. brucei</i> | 42  | 62   | 103  |
| Tbg972.11.14390 | <i>T. brucei</i> | 53  | 60   | 112  |
| Tbg972.11.14390 | <i>T. brucei</i> | 124 | 327  | 450  |
| Tbg972.11.14390 | <i>T. brucei</i> | 124 | 327  | 450  |
| Tbg972.11.1440  | <i>T. brucei</i> | 43  | 98   | 140  |
| Tbg972.11.14430 | <i>T. brucei</i> | 132 | 34   | 165  |
| Tbg972.11.14430 | <i>T. brucei</i> | 148 | 235  | 382  |
| Tbg972.11.14440 | <i>T. brucei</i> | 47  | 30   | 76   |
| Tbg972.11.14440 | <i>T. brucei</i> | 73  | 135  | 207  |

|                 |                  |     |      |      |
|-----------------|------------------|-----|------|------|
| Tbg972.11.14440 | <i>T. brucei</i> | 233 | 212  | 444  |
| Tbg972.11.14460 | <i>T. brucei</i> | 168 | 226  | 393  |
| Tbg972.11.14460 | <i>T. brucei</i> | 41  | 657  | 697  |
| Tbg972.11.14460 | <i>T. brucei</i> | 94  | 726  | 819  |
| Tbg972.11.14460 | <i>T. brucei</i> | 102 | 915  | 1016 |
| Tbg972.11.14460 | <i>T. brucei</i> | 42  | 1150 | 1191 |
| Tbg972.11.14470 | <i>T. brucei</i> | 40  | 1    | 40   |
| Tbg972.11.14490 | <i>T. brucei</i> | 89  | 1    | 89   |
| Tbg972.11.14500 | <i>T. brucei</i> | 89  | 1    | 89   |
| Tbg972.11.14510 | <i>T. brucei</i> | 89  | 1    | 89   |
| Tbg972.11.14520 | <i>T. brucei</i> | 89  | 1    | 89   |
| Tbg972.11.14530 | <i>T. brucei</i> | 47  | 263  | 309  |
| Tbg972.11.14530 | <i>T. brucei</i> | 49  | 455  | 503  |
| Tbg972.11.14530 | <i>T. brucei</i> | 46  | 516  | 561  |
| Tbg972.11.14530 | <i>T. brucei</i> | 276 | 724  | 999  |
| Tbg972.11.14550 | <i>T. brucei</i> | 75  | 11   | 85   |
| Tbg972.11.14570 | <i>T. brucei</i> | 73  | 261  | 333  |
| Tbg972.11.14580 | <i>T. brucei</i> | 112 | 127  | 238  |
| Tbg972.11.14580 | <i>T. brucei</i> | 87  | 275  | 361  |
| Tbg972.11.14590 | <i>T. brucei</i> | 94  | 1    | 94   |
| Tbg972.11.14590 | <i>T. brucei</i> | 47  | 234  | 280  |
| Tbg972.11.14590 | <i>T. brucei</i> | 63  | 436  | 498  |
| Tbg972.11.14590 | <i>T. brucei</i> | 50  | 593  | 642  |
| Tbg972.11.14590 | <i>T. brucei</i> | 48  | 672  | 719  |
| Tbg972.11.1460  | <i>T. brucei</i> | 48  | 912  | 959  |
| Tbg972.11.1460  | <i>T. brucei</i> | 77  | 1268 | 1344 |
| Tbg972.11.1460  | <i>T. brucei</i> | 44  | 1421 | 1464 |
| Tbg972.11.1460  | <i>T. brucei</i> | 78  | 1692 | 1769 |
| Tbg972.11.1460  | <i>T. brucei</i> | 40  | 2608 | 2647 |
| Tbg972.11.1460  | <i>T. brucei</i> | 62  | 2679 | 2740 |
| Tbg972.11.1460  | <i>T. brucei</i> | 69  | 2893 | 2961 |
| Tbg972.11.14610 | <i>T. brucei</i> | 52  | 51   | 102  |
| Tbg972.11.14620 | <i>T. brucei</i> | 83  | 77   | 159  |
| Tbg972.11.14630 | <i>T. brucei</i> | 46  | 69   | 114  |
| Tbg972.11.14650 | <i>T. brucei</i> | 42  | 483  | 524  |
| Tbg972.11.14670 | <i>T. brucei</i> | 40  | 1    | 40   |
| Tbg972.11.1470  | <i>T. brucei</i> | 47  | 109  | 155  |
| Tbg972.11.14700 | <i>T. brucei</i> | 50  | 238  | 287  |
| Tbg972.11.14710 | <i>T. brucei</i> | 49  | 70   | 118  |
| Tbg972.11.14710 | <i>T. brucei</i> | 60  | 436  | 495  |
| Tbg972.11.14720 | <i>T. brucei</i> | 73  | 200  | 272  |
| Tbg972.11.14740 | <i>T. brucei</i> | 113 | 1    | 113  |
| Tbg972.11.14740 | <i>T. brucei</i> | 99  | 148  | 246  |
| Tbg972.11.14750 | <i>T. brucei</i> | 84  | 1    | 84   |
| Tbg972.11.14770 | <i>T. brucei</i> | 48  | 146  | 193  |
| Tbg972.11.14780 | <i>T. brucei</i> | 43  | 184  | 226  |
| Tbg972.11.1480  | <i>T. brucei</i> | 77  | 253  | 329  |



|                 |                  |     |      |      |
|-----------------|------------------|-----|------|------|
| Tbg972.11.14800 | <i>T. brucei</i> | 176 | 118  | 293  |
| Tbg972.11.14810 | <i>T. brucei</i> | 212 | 59   | 270  |
| Tbg972.11.14820 | <i>T. brucei</i> | 46  | 24   | 69   |
| Tbg972.11.14850 | <i>T. brucei</i> | 46  | 1    | 46   |
| Tbg972.11.14860 | <i>T. brucei</i> | 64  | 1    | 64   |
| Tbg972.11.14860 | <i>T. brucei</i> | 62  | 80   | 141  |
| Tbg972.11.14860 | <i>T. brucei</i> | 71  | 232  | 302  |
| Tbg972.11.14870 | <i>T. brucei</i> | 101 | 117  | 217  |
| Tbg972.11.14870 | <i>T. brucei</i> | 50  | 326  | 375  |
| Tbg972.11.14870 | <i>T. brucei</i> | 48  | 539  | 586  |
| Tbg972.11.1490  | <i>T. brucei</i> | 53  | 323  | 375  |
| Tbg972.11.14900 | <i>T. brucei</i> | 469 | 48   | 516  |
| Tbg972.11.14900 | <i>T. brucei</i> | 98  | 539  | 636  |
| Tbg972.11.14910 | <i>T. brucei</i> | 76  | 261  | 336  |
| Tbg972.11.14920 | <i>T. brucei</i> | 44  | 1    | 44   |
| Tbg972.11.14920 | <i>T. brucei</i> | 60  | 66   | 125  |
| Tbg972.11.14920 | <i>T. brucei</i> | 49  | 143  | 191  |
| Tbg972.11.14920 | <i>T. brucei</i> | 155 | 410  | 564  |
| Tbg972.11.14930 | <i>T. brucei</i> | 81  | 197  | 277  |
| Tbg972.11.14940 | <i>T. brucei</i> | 43  | 51   | 93   |
| Tbg972.11.14940 | <i>T. brucei</i> | 47  | 628  | 674  |
| Tbg972.11.14940 | <i>T. brucei</i> | 45  | 814  | 858  |
| Tbg972.11.14940 | <i>T. brucei</i> | 141 | 956  | 1096 |
| Tbg972.11.14940 | <i>T. brucei</i> | 54  | 1938 | 1991 |
| Tbg972.11.14960 | <i>T. brucei</i> | 78  | 277  | 354  |
| Tbg972.11.14960 | <i>T. brucei</i> | 71  | 482  | 552  |
| Tbg972.11.14970 | <i>T. brucei</i> | 114 | 1    | 114  |
| Tbg972.11.14970 | <i>T. brucei</i> | 133 | 137  | 269  |
| Tbg972.11.14980 | <i>T. brucei</i> | 52  | 1    | 52   |
| Tbg972.11.14980 | <i>T. brucei</i> | 61  | 214  | 274  |
| Tbg972.11.14980 | <i>T. brucei</i> | 45  | 290  | 334  |
| Tbg972.11.14990 | <i>T. brucei</i> | 50  | 12   | 61   |
| Tbg972.11.14990 | <i>T. brucei</i> | 56  | 100  | 155  |
| Tbg972.11.14990 | <i>T. brucei</i> | 56  | 100  | 155  |
| Tbg972.11.1500  | <i>T. brucei</i> | 65  | 352  | 416  |
| Tbg972.11.15010 | <i>T. brucei</i> | 73  | 1    | 73   |
| Tbg972.11.15010 | <i>T. brucei</i> | 73  | 147  | 219  |
| Tbg972.11.15020 | <i>T. brucei</i> | 58  | 83   | 140  |
| Tbg972.11.15020 | <i>T. brucei</i> | 61  | 156  | 216  |
| Tbg972.11.15040 | <i>T. brucei</i> | 54  | 199  | 252  |
| Tbg972.11.15050 | <i>T. brucei</i> | 54  | 110  | 163  |
| Tbg972.11.15050 | <i>T. brucei</i> | 41  | 273  | 313  |
| Tbg972.11.15050 | <i>T. brucei</i> | 41  | 273  | 313  |
| Tbg972.11.15070 | <i>T. brucei</i> | 48  | 268  | 315  |
| Tbg972.11.15070 | <i>T. brucei</i> | 42  | 322  | 363  |
| Tbg972.11.15070 | <i>T. brucei</i> | 57  | 536  | 592  |
| Tbg972.11.15090 | <i>T. brucei</i> | 49  | 1    | 49   |

|                 |                  |     |      |      |
|-----------------|------------------|-----|------|------|
| Tbg972.11.15100 | <i>T. brucei</i> | 42  | 43   | 84   |
| Tbg972.11.15100 | <i>T. brucei</i> | 72  | 561  | 632  |
| Tbg972.11.15100 | <i>T. brucei</i> | 42  | 686  | 727  |
| Tbg972.11.15110 | <i>T. brucei</i> | 100 | 122  | 221  |
| Tbg972.11.15120 | <i>T. brucei</i> | 97  | 1    | 97   |
| Tbg972.11.15130 | <i>T. brucei</i> | 84  | 1    | 84   |
| Tbg972.11.15140 | <i>T. brucei</i> | 52  | 466  | 517  |
| Tbg972.11.15140 | <i>T. brucei</i> | 44  | 558  | 601  |
| Tbg972.11.15140 | <i>T. brucei</i> | 44  | 558  | 601  |
| Tbg972.11.15150 | <i>T. brucei</i> | 130 | 1    | 130  |
| Tbg972.11.15180 | <i>T. brucei</i> | 111 | 108  | 218  |
| Tbg972.11.15180 | <i>T. brucei</i> | 86  | 280  | 365  |
| Tbg972.11.15230 | <i>T. brucei</i> | 43  | 551  | 593  |
| Tbg972.11.15250 | <i>T. brucei</i> | 81  | 1    | 81   |
| Tbg972.11.15260 | <i>T. brucei</i> | 61  | 33   | 93   |
| Tbg972.11.15260 | <i>T. brucei</i> | 51  | 148  | 198  |
| Tbg972.11.15260 | <i>T. brucei</i> | 64  | 230  | 293  |
| Tbg972.11.15260 | <i>T. brucei</i> | 64  | 1175 | 1238 |
| Tbg972.11.15290 | <i>T. brucei</i> | 173 | 162  | 334  |
| Tbg972.11.15290 | <i>T. brucei</i> | 258 | 367  | 624  |
| Tbg972.11.15290 | <i>T. brucei</i> | 119 | 636  | 754  |
| Tbg972.11.15300 | <i>T. brucei</i> | 72  | 60   | 131  |
| Tbg972.11.15310 | <i>T. brucei</i> | 198 | 1    | 198  |
| Tbg972.11.15340 | <i>T. brucei</i> | 50  | 66   | 115  |
| Tbg972.11.15350 | <i>T. brucei</i> | 68  | 68   | 135  |
| Tbg972.11.15390 | <i>T. brucei</i> | 63  | 197  | 259  |
| Tbg972.11.1540  | <i>T. brucei</i> | 60  | 521  | 580  |
| Tbg972.11.15410 | <i>T. brucei</i> | 111 | 32   | 142  |
| Tbg972.11.15430 | <i>T. brucei</i> | 110 | 1    | 110  |
| Tbg972.11.15430 | <i>T. brucei</i> | 75  | 482  | 556  |
| Tbg972.11.15440 | <i>T. brucei</i> | 57  | 112  | 168  |
| Tbg972.11.15440 | <i>T. brucei</i> | 62  | 234  | 295  |
| Tbg972.11.15440 | <i>T. brucei</i> | 62  | 234  | 295  |
| Tbg972.11.15450 | <i>T. brucei</i> | 75  | 97   | 171  |
| Tbg972.11.15460 | <i>T. brucei</i> | 52  | 277  | 328  |
| Tbg972.11.15480 | <i>T. brucei</i> | 74  | 1    | 74   |
| Tbg972.11.15480 | <i>T. brucei</i> | 68  | 83   | 150  |
| Tbg972.11.1550  | <i>T. brucei</i> | 112 | 102  | 213  |
| Tbg972.11.1550  | <i>T. brucei</i> | 43  | 226  | 268  |
| Tbg972.11.1550  | <i>T. brucei</i> | 65  | 895  | 959  |
| Tbg972.11.15500 | <i>T. brucei</i> | 45  | 1    | 45   |
| Tbg972.11.15520 | <i>T. brucei</i> | 42  | 48   | 89   |
| Tbg972.11.15550 | <i>T. brucei</i> | 99  | 361  | 459  |
| Tbg972.11.15550 | <i>T. brucei</i> | 204 | 533  | 736  |
| Tbg972.11.15550 | <i>T. brucei</i> | 353 | 763  | 1115 |
| Tbg972.11.15560 | <i>T. brucei</i> | 62  | 1    | 62   |
| Tbg972.11.15570 | <i>T. brucei</i> | 57  | 160  | 216  |

|                 |                  |     |      |      |
|-----------------|------------------|-----|------|------|
| Tbg972.11.15590 | <i>T. brucei</i> | 52  | 76   | 127  |
| Tbg972.11.1560  | <i>T. brucei</i> | 48  | 118  | 165  |
| Tbg972.11.1560  | <i>T. brucei</i> | 63  | 179  | 241  |
| Tbg972.11.1560  | <i>T. brucei</i> | 79  | 304  | 382  |
| Tbg972.11.15600 | <i>T. brucei</i> | 168 | 1    | 168  |
| Tbg972.11.15610 | <i>T. brucei</i> | 97  | 215  | 311  |
| Tbg972.11.15610 | <i>T. brucei</i> | 66  | 319  | 384  |
| Tbg972.11.15610 | <i>T. brucei</i> | 66  | 319  | 384  |
| Tbg972.11.15630 | <i>T. brucei</i> | 54  | 1    | 54   |
| Tbg972.11.15630 | <i>T. brucei</i> | 74  | 189  | 262  |
| Tbg972.11.15650 | <i>T. brucei</i> | 82  | 1    | 82   |
| Tbg972.11.15650 | <i>T. brucei</i> | 73  | 207  | 279  |
| Tbg972.11.15660 | <i>T. brucei</i> | 46  | 236  | 281  |
| Tbg972.11.1570  | <i>T. brucei</i> | 48  | 1112 | 1159 |
| Tbg972.11.15700 | <i>T. brucei</i> | 68  | 1    | 68   |
| Tbg972.11.15700 | <i>T. brucei</i> | 90  | 814  | 903  |
| Tbg972.11.15710 | <i>T. brucei</i> | 64  | 1    | 64   |
| Tbg972.11.15730 | <i>T. brucei</i> | 125 | 134  | 258  |
| Tbg972.11.15730 | <i>T. brucei</i> | 44  | 330  | 373  |
| Tbg972.11.15740 | <i>T. brucei</i> | 96  | 172  | 267  |
| Tbg972.11.15740 | <i>T. brucei</i> | 40  | 466  | 505  |
| Tbg972.11.15750 | <i>T. brucei</i> | 84  | 1    | 84   |
| Tbg972.11.15770 | <i>T. brucei</i> | 43  | 371  | 413  |
| Tbg972.11.1580  | <i>T. brucei</i> | 48  | 1112 | 1159 |
| Tbg972.11.15810 | <i>T. brucei</i> | 67  | 49   | 115  |
| Tbg972.11.15850 | <i>T. brucei</i> | 87  | 251  | 337  |
| Tbg972.11.15850 | <i>T. brucei</i> | 99  | 564  | 662  |
| Tbg972.11.15860 | <i>T. brucei</i> | 43  | 128  | 170  |
| Tbg972.11.15860 | <i>T. brucei</i> | 60  | 272  | 331  |
| Tbg972.11.15860 | <i>T. brucei</i> | 60  | 272  | 331  |
| Tbg972.11.15870 | <i>T. brucei</i> | 42  | 143  | 184  |
| Tbg972.11.15880 | <i>T. brucei</i> | 52  | 174  | 225  |
| Tbg972.11.15880 | <i>T. brucei</i> | 65  | 433  | 497  |
| Tbg972.11.15880 | <i>T. brucei</i> | 41  | 689  | 729  |
| Tbg972.11.15880 | <i>T. brucei</i> | 45  | 848  | 892  |
| Tbg972.11.15880 | <i>T. brucei</i> | 93  | 1130 | 1222 |
| Tbg972.11.15880 | <i>T. brucei</i> | 55  | 1272 | 1326 |
| Tbg972.11.15880 | <i>T. brucei</i> | 53  | 1381 | 1433 |
| Tbg972.11.15880 | <i>T. brucei</i> | 56  | 1449 | 1504 |
| Tbg972.11.15890 | <i>T. brucei</i> | 53  | 19   | 71   |
| Tbg972.11.15890 | <i>T. brucei</i> | 62  | 105  | 166  |
| Tbg972.11.15890 | <i>T. brucei</i> | 88  | 312  | 399  |
| Tbg972.11.15890 | <i>T. brucei</i> | 81  | 436  | 516  |
| Tbg972.11.15940 | <i>T. brucei</i> | 63  | 162  | 224  |
| Tbg972.11.15940 | <i>T. brucei</i> | 41  | 379  | 419  |
| Tbg972.11.15940 | <i>T. brucei</i> | 41  | 379  | 419  |
| Tbg972.11.15950 | <i>T. brucei</i> | 150 | 77   | 226  |

|                 |                  |     |      |      |
|-----------------|------------------|-----|------|------|
| Tbg972.11.15950 | <i>T. brucei</i> | 70  | 955  | 1024 |
| Tbg972.11.15970 | <i>T. brucei</i> | 99  | 190  | 288  |
| Tbg972.11.15980 | <i>T. brucei</i> | 105 | 81   | 185  |
| Tbg972.11.15980 | <i>T. brucei</i> | 68  | 245  | 312  |
| Tbg972.11.15980 | <i>T. brucei</i> | 46  | 420  | 465  |
| Tbg972.11.15980 | <i>T. brucei</i> | 49  | 681  | 729  |
| Tbg972.11.160   | <i>T. brucei</i> | 85  | 188  | 272  |
| Tbg972.11.160   | <i>T. brucei</i> | 88  | 530  | 617  |
| Tbg972.11.160   | <i>T. brucei</i> | 88  | 530  | 617  |
| Tbg972.11.1600  | <i>T. brucei</i> | 67  | 58   | 124  |
| Tbg972.11.16010 | <i>T. brucei</i> | 54  | 55   | 108  |
| Tbg972.11.16010 | <i>T. brucei</i> | 90  | 513  | 602  |
| Tbg972.11.16050 | <i>T. brucei</i> | 51  | 289  | 339  |
| Tbg972.11.16050 | <i>T. brucei</i> | 74  | 369  | 442  |
| Tbg972.11.16050 | <i>T. brucei</i> | 54  | 637  | 690  |
| Tbg972.11.16050 | <i>T. brucei</i> | 207 | 804  | 1010 |
| Tbg972.11.16050 | <i>T. brucei</i> | 40  | 1288 | 1327 |
| Tbg972.11.16080 | <i>T. brucei</i> | 63  | 1    | 63   |
| Tbg972.11.16090 | <i>T. brucei</i> | 54  | 71   | 124  |
| Tbg972.11.1610  | <i>T. brucei</i> | 70  | 1    | 70   |
| Tbg972.11.16100 | <i>T. brucei</i> | 50  | 1    | 50   |
| Tbg972.11.16110 | <i>T. brucei</i> | 361 | 1    | 361  |
| Tbg972.11.16110 | <i>T. brucei</i> | 193 | 363  | 555  |
| Tbg972.11.16110 | <i>T. brucei</i> | 98  | 570  | 667  |
| Tbg972.11.16110 | <i>T. brucei</i> | 252 | 685  | 936  |
| Tbg972.11.16120 | <i>T. brucei</i> | 46  | 19   | 64   |
| Tbg972.11.16130 | <i>T. brucei</i> | 77  | 167  | 243  |
| Tbg972.11.16140 | <i>T. brucei</i> | 81  | 212  | 292  |
| Tbg972.11.16150 | <i>T. brucei</i> | 59  | 164  | 222  |
| Tbg972.11.16150 | <i>T. brucei</i> | 167 | 361  | 527  |
| Tbg972.11.16150 | <i>T. brucei</i> | 167 | 361  | 527  |
| Tbg972.11.16160 | <i>T. brucei</i> | 275 | 66   | 340  |
| Tbg972.11.16180 | <i>T. brucei</i> | 69  | 365  | 433  |
| Tbg972.11.16190 | <i>T. brucei</i> | 48  | 207  | 254  |
| Tbg972.11.16190 | <i>T. brucei</i> | 80  | 399  | 478  |
| Tbg972.11.16190 | <i>T. brucei</i> | 67  | 554  | 620  |
| Tbg972.11.16190 | <i>T. brucei</i> | 110 | 648  | 757  |
| Tbg972.11.16200 | <i>T. brucei</i> | 65  | 122  | 186  |
| Tbg972.11.16200 | <i>T. brucei</i> | 67  | 241  | 307  |
| Tbg972.11.16210 | <i>T. brucei</i> | 49  | 378  | 426  |
| Tbg972.11.16240 | <i>T. brucei</i> | 40  | 257  | 296  |
| Tbg972.11.16250 | <i>T. brucei</i> | 55  | 1    | 55   |
| Tbg972.11.16260 | <i>T. brucei</i> | 56  | 136  | 191  |
| Tbg972.11.16270 | <i>T. brucei</i> | 195 | 84   | 278  |
| Tbg972.11.16270 | <i>T. brucei</i> | 65  | 292  | 356  |
| Tbg972.11.16270 | <i>T. brucei</i> | 168 | 400  | 567  |
| Tbg972.11.16280 | <i>T. brucei</i> | 104 | 1    | 104  |

|                 |                  |     |      |      |
|-----------------|------------------|-----|------|------|
| Tbg972.11.16290 | <i>T. brucei</i> | 75  | 158  | 232  |
| Tbg972.11.16290 | <i>T. brucei</i> | 76  | 489  | 564  |
| Tbg972.11.16290 | <i>T. brucei</i> | 76  | 489  | 564  |
| Tbg972.11.16330 | <i>T. brucei</i> | 96  | 1    | 96   |
| Tbg972.11.16370 | <i>T. brucei</i> | 43  | 188  | 230  |
| Tbg972.11.16370 | <i>T. brucei</i> | 59  | 408  | 466  |
| Tbg972.11.16370 | <i>T. brucei</i> | 59  | 408  | 466  |
| Tbg972.11.16380 | <i>T. brucei</i> | 102 | 72   | 173  |
| Tbg972.11.16390 | <i>T. brucei</i> | 57  | 169  | 225  |
| Tbg972.11.16390 | <i>T. brucei</i> | 59  | 292  | 350  |
| Tbg972.11.16390 | <i>T. brucei</i> | 59  | 292  | 350  |
| Tbg972.11.16410 | <i>T. brucei</i> | 43  | 351  | 393  |
| Tbg972.11.16410 | <i>T. brucei</i> | 224 | 987  | 1210 |
| Tbg972.11.16410 | <i>T. brucei</i> | 41  | 1252 | 1292 |
| Tbg972.11.16420 | <i>T. brucei</i> | 64  | 26   | 89   |
| Tbg972.11.16430 | <i>T. brucei</i> | 499 | 63   | 561  |
| Tbg972.11.16430 | <i>T. brucei</i> | 92  | 913  | 1004 |
| Tbg972.11.16450 | <i>T. brucei</i> | 62  | 1    | 62   |
| Tbg972.11.16460 | <i>T. brucei</i> | 68  | 1    | 68   |
| Tbg972.11.16460 | <i>T. brucei</i> | 43  | 774  | 816  |
| Tbg972.11.16460 | <i>T. brucei</i> | 51  | 2063 | 2113 |
| Tbg972.11.16460 | <i>T. brucei</i> | 43  | 2527 | 2569 |
| Tbg972.11.16470 | <i>T. brucei</i> | 75  | 120  | 194  |
| Tbg972.11.16470 | <i>T. brucei</i> | 52  | 219  | 270  |
| Tbg972.11.16480 | <i>T. brucei</i> | 96  | 27   | 122  |
| Tbg972.11.16480 | <i>T. brucei</i> | 63  | 485  | 547  |
| Tbg972.11.16490 | <i>T. brucei</i> | 41  | 24   | 64   |
| Tbg972.11.16500 | <i>T. brucei</i> | 202 | 1    | 202  |
| Tbg972.11.16510 | <i>T. brucei</i> | 111 | 54   | 164  |
| Tbg972.11.16510 | <i>T. brucei</i> | 63  | 198  | 260  |
| Tbg972.11.16520 | <i>T. brucei</i> | 86  | 1    | 86   |
| Tbg972.11.16520 | <i>T. brucei</i> | 55  | 367  | 421  |
| Tbg972.11.16520 | <i>T. brucei</i> | 64  | 614  | 677  |
| Tbg972.11.16530 | <i>T. brucei</i> | 76  | 123  | 198  |
| Tbg972.11.16530 | <i>T. brucei</i> | 69  | 456  | 524  |
| Tbg972.11.16530 | <i>T. brucei</i> | 69  | 456  | 524  |
| Tbg972.11.16550 | <i>T. brucei</i> | 103 | 71   | 173  |
| Tbg972.11.16570 | <i>T. brucei</i> | 53  | 92   | 144  |
| Tbg972.11.16600 | <i>T. brucei</i> | 72  | 38   | 109  |
| Tbg972.11.16600 | <i>T. brucei</i> | 45  | 256  | 300  |
| Tbg972.11.16600 | <i>T. brucei</i> | 40  | 612  | 651  |
| Tbg972.11.16610 | <i>T. brucei</i> | 341 | 15   | 355  |
| Tbg972.11.16610 | <i>T. brucei</i> | 62  | 397  | 458  |
| Tbg972.11.16620 | <i>T. brucei</i> | 48  | 1    | 48   |
| Tbg972.11.16630 | <i>T. brucei</i> | 44  | 669  | 712  |
| Tbg972.11.16640 | <i>T. brucei</i> | 41  | 2    | 42   |
| Tbg972.11.16640 | <i>T. brucei</i> | 146 | 78   | 223  |

|                 |                  |     |      |      |
|-----------------|------------------|-----|------|------|
| Tbg972.11.16650 | <i>T. brucei</i> | 173 | 78   | 250  |
| Tbg972.11.16660 | <i>T. brucei</i> | 169 | 1    | 169  |
| Tbg972.11.16660 | <i>T. brucei</i> | 60  | 275  | 334  |
| Tbg972.11.16670 | <i>T. brucei</i> | 141 | 16   | 156  |
| Tbg972.11.16670 | <i>T. brucei</i> | 67  | 173  | 239  |
| Tbg972.11.16670 | <i>T. brucei</i> | 118 | 257  | 374  |
| Tbg972.11.16670 | <i>T. brucei</i> | 223 | 414  | 636  |
| Tbg972.11.16690 | <i>T. brucei</i> | 319 | 53   | 371  |
| Tbg972.11.1670  | <i>T. brucei</i> | 67  | 131  | 197  |
| Tbg972.11.16720 | <i>T. brucei</i> | 68  | 362  | 429  |
| Tbg972.11.16730 | <i>T. brucei</i> | 144 | 2183 | 2326 |
| Tbg972.11.16730 | <i>T. brucei</i> | 85  | 3088 | 3172 |
| Tbg972.11.16730 | <i>T. brucei</i> | 63  | 3208 | 3270 |
| Tbg972.11.16750 | <i>T. brucei</i> | 146 | 25   | 170  |
| Tbg972.11.16750 | <i>T. brucei</i> | 68  | 347  | 414  |
| Tbg972.11.16750 | <i>T. brucei</i> | 202 | 457  | 658  |
| Tbg972.11.16780 | <i>T. brucei</i> | 47  | 519  | 565  |
| Tbg972.11.16780 | <i>T. brucei</i> | 49  | 656  | 704  |
| Tbg972.11.16800 | <i>T. brucei</i> | 77  | 16   | 92   |
| Tbg972.11.16800 | <i>T. brucei</i> | 46  | 169  | 214  |
| Tbg972.11.16800 | <i>T. brucei</i> | 61  | 222  | 282  |
| Tbg972.11.16800 | <i>T. brucei</i> | 238 | 342  | 579  |
| Tbg972.11.16800 | <i>T. brucei</i> | 41  | 581  | 621  |
| Tbg972.11.16810 | <i>T. brucei</i> | 42  | 281  | 322  |
| Tbg972.11.16830 | <i>T. brucei</i> | 51  | 41   | 91   |
| Tbg972.11.16850 | <i>T. brucei</i> | 70  | 1    | 70   |
| Tbg972.11.16850 | <i>T. brucei</i> | 41  | 325  | 365  |
| Tbg972.11.16870 | <i>T. brucei</i> | 81  | 1    | 81   |
| Tbg972.11.16890 | <i>T. brucei</i> | 53  | 542  | 594  |
| Tbg972.11.1690  | <i>T. brucei</i> | 43  | 1    | 43   |
| Tbg972.11.1690  | <i>T. brucei</i> | 67  | 141  | 207  |
| Tbg972.11.1690  | <i>T. brucei</i> | 67  | 141  | 207  |
| Tbg972.11.16900 | <i>T. brucei</i> | 113 | 364  | 476  |
| Tbg972.11.16910 | <i>T. brucei</i> | 50  | 1    | 50   |
| Tbg972.11.16920 | <i>T. brucei</i> | 74  | 31   | 104  |
| Tbg972.11.16920 | <i>T. brucei</i> | 52  | 919  | 970  |
| Tbg972.11.16960 | <i>T. brucei</i> | 70  | 33   | 102  |
| Tbg972.11.16960 | <i>T. brucei</i> | 634 | 305  | 938  |
| Tbg972.11.16970 | <i>T. brucei</i> | 51  | 74   | 124  |
| Tbg972.11.16990 | <i>T. brucei</i> | 222 | 1    | 222  |
| Tbg972.11.16990 | <i>T. brucei</i> | 58  | 227  | 284  |
| Tbg972.11.16990 | <i>T. brucei</i> | 362 | 362  | 723  |
| Tbg972.11.17010 | <i>T. brucei</i> | 123 | 1    | 123  |
| Tbg972.11.17010 | <i>T. brucei</i> | 43  | 150  | 192  |
| Tbg972.11.17010 | <i>T. brucei</i> | 231 | 338  | 568  |
| Tbg972.11.17040 | <i>T. brucei</i> | 56  | 1    | 56   |
| Tbg972.11.17040 | <i>T. brucei</i> | 75  | 91   | 165  |

|                 |                  |     |      |      |
|-----------------|------------------|-----|------|------|
| Tbg972.11.17040 | <i>T. brucei</i> | 60  | 257  | 316  |
| Tbg972.11.17040 | <i>T. brucei</i> | 50  | 327  | 376  |
| Tbg972.11.17050 | <i>T. brucei</i> | 87  | 178  | 264  |
| Tbg972.11.17060 | <i>T. brucei</i> | 111 | 1    | 111  |
| Tbg972.11.17070 | <i>T. brucei</i> | 42  | 4    | 45   |
| Tbg972.11.17070 | <i>T. brucei</i> | 41  | 62   | 102  |
| Tbg972.11.17070 | <i>T. brucei</i> | 89  | 115  | 203  |
| Tbg972.11.17070 | <i>T. brucei</i> | 94  | 247  | 340  |
| Tbg972.11.17070 | <i>T. brucei</i> | 74  | 380  | 453  |
| Tbg972.11.17070 | <i>T. brucei</i> | 90  | 483  | 572  |
| Tbg972.11.17070 | <i>T. brucei</i> | 91  | 592  | 682  |
| Tbg972.11.17090 | <i>T. brucei</i> | 82  | 237  | 318  |
| Tbg972.11.1710  | <i>T. brucei</i> | 101 | 775  | 875  |
| Tbg972.11.17100 | <i>T. brucei</i> | 52  | 250  | 301  |
| Tbg972.11.17130 | <i>T. brucei</i> | 73  | 1    | 73   |
| Tbg972.11.17130 | <i>T. brucei</i> | 90  | 294  | 383  |
| Tbg972.11.17130 | <i>T. brucei</i> | 192 | 415  | 606  |
| Tbg972.11.17180 | <i>T. brucei</i> | 47  | 1    | 47   |
| Tbg972.11.17190 | <i>T. brucei</i> | 308 | 290  | 597  |
| Tbg972.11.17190 | <i>T. brucei</i> | 48  | 615  | 662  |
| Tbg972.11.1720  | <i>T. brucei</i> | 42  | 151  | 192  |
| Tbg972.11.17200 | <i>T. brucei</i> | 54  | 147  | 200  |
| Tbg972.11.17200 | <i>T. brucei</i> | 78  | 337  | 414  |
| Tbg972.11.17200 | <i>T. brucei</i> | 78  | 337  | 414  |
| Tbg972.11.17210 | <i>T. brucei</i> | 65  | 145  | 209  |
| Tbg972.11.17210 | <i>T. brucei</i> | 42  | 897  | 938  |
| Tbg972.11.17210 | <i>T. brucei</i> | 42  | 897  | 938  |
| Tbg972.11.17220 | <i>T. brucei</i> | 51  | 45   | 95   |
| Tbg972.11.17230 | <i>T. brucei</i> | 52  | 69   | 120  |
| Tbg972.11.17230 | <i>T. brucei</i> | 81  | 183  | 263  |
| Tbg972.11.17280 | <i>T. brucei</i> | 153 | 1066 | 1218 |
| Tbg972.11.1730  | <i>T. brucei</i> | 70  | 16   | 85   |
| Tbg972.11.1730  | <i>T. brucei</i> | 62  | 87   | 148  |
| Tbg972.11.17310 | <i>T. brucei</i> | 101 | 1    | 101  |
| Tbg972.11.17320 | <i>T. brucei</i> | 40  | 141  | 180  |
| Tbg972.11.17330 | <i>T. brucei</i> | 163 | 96   | 258  |
| Tbg972.11.17330 | <i>T. brucei</i> | 851 | 283  | 1133 |
| Tbg972.11.17330 | <i>T. brucei</i> | 78  | 1460 | 1537 |
| Tbg972.11.17340 | <i>T. brucei</i> | 64  | 1    | 64   |
| Tbg972.11.17340 | <i>T. brucei</i> | 53  | 72   | 124  |
| Tbg972.11.17340 | <i>T. brucei</i> | 61  | 665  | 725  |
| Tbg972.11.17350 | <i>T. brucei</i> | 63  | 434  | 496  |
| Tbg972.11.17360 | <i>T. brucei</i> | 74  | 1    | 74   |
| Tbg972.11.17360 | <i>T. brucei</i> | 45  | 164  | 208  |
| Tbg972.11.17360 | <i>T. brucei</i> | 45  | 164  | 208  |
| Tbg972.11.17370 | <i>T. brucei</i> | 40  | 59   | 98   |
| Tbg972.11.17370 | <i>T. brucei</i> | 947 | 240  | 1186 |

|                 |                  |     |      |      |
|-----------------|------------------|-----|------|------|
| Tbg972.11.17370 | <i>T. brucei</i> | 43  | 1229 | 1271 |
| Tbg972.11.17390 | <i>T. brucei</i> | 40  | 59   | 98   |
| Tbg972.11.17390 | <i>T. brucei</i> | 798 | 240  | 1037 |
| Tbg972.11.17410 | <i>T. brucei</i> | 124 | 75   | 198  |
| Tbg972.11.17410 | <i>T. brucei</i> | 53  | 283  | 335  |
| Tbg972.11.17410 | <i>T. brucei</i> | 53  | 283  | 335  |
| Tbg972.11.17430 | <i>T. brucei</i> | 44  | 1    | 44   |
| Tbg972.11.17460 | <i>T. brucei</i> | 357 | 1    | 357  |
| Tbg972.11.17470 | <i>T. brucei</i> | 45  | 1    | 45   |
| Tbg972.11.17480 | <i>T. brucei</i> | 68  | 18   | 85   |
| Tbg972.11.17480 | <i>T. brucei</i> | 138 | 194  | 331  |
| Tbg972.11.17500 | <i>T. brucei</i> | 118 | 449  | 566  |
| Tbg972.11.17520 | <i>T. brucei</i> | 44  | 1    | 44   |
| Tbg972.11.17520 | <i>T. brucei</i> | 40  | 137  | 176  |
| Tbg972.11.17520 | <i>T. brucei</i> | 212 | 377  | 588  |
| Tbg972.11.17520 | <i>T. brucei</i> | 58  | 726  | 783  |
| Tbg972.11.17520 | <i>T. brucei</i> | 124 | 843  | 966  |
| Tbg972.11.17530 | <i>T. brucei</i> | 42  | 62   | 103  |
| Tbg972.11.17530 | <i>T. brucei</i> | 47  | 578  | 624  |
| Tbg972.11.17530 | <i>T. brucei</i> | 47  | 578  | 624  |
| Tbg972.11.17550 | <i>T. brucei</i> | 60  | 23   | 82   |
| Tbg972.11.17570 | <i>T. brucei</i> | 62  | 101  | 162  |
| Tbg972.11.17570 | <i>T. brucei</i> | 239 | 226  | 464  |
| Tbg972.11.17570 | <i>T. brucei</i> | 43  | 477  | 519  |
| Tbg972.11.17590 | <i>T. brucei</i> | 51  | 1    | 51   |
| Tbg972.11.1760  | <i>T. brucei</i> | 89  | 49   | 137  |
| Tbg972.11.1760  | <i>T. brucei</i> | 65  | 642  | 706  |
| Tbg972.11.17600 | <i>T. brucei</i> | 79  | 52   | 130  |
| Tbg972.11.17600 | <i>T. brucei</i> | 43  | 168  | 210  |
| Tbg972.11.17600 | <i>T. brucei</i> | 51  | 498  | 548  |
| Tbg972.11.17600 | <i>T. brucei</i> | 42  | 935  | 976  |
| Tbg972.11.17650 | <i>T. brucei</i> | 60  | 149  | 208  |
| Tbg972.11.17660 | <i>T. brucei</i> | 129 | 1    | 129  |
| Tbg972.11.17660 | <i>T. brucei</i> | 232 | 157  | 388  |
| Tbg972.11.17660 | <i>T. brucei</i> | 52  | 470  | 521  |
| Tbg972.11.17670 | <i>T. brucei</i> | 69  | 1    | 69   |
| Tbg972.11.17670 | <i>T. brucei</i> | 40  | 1300 | 1339 |
| Tbg972.11.17690 | <i>T. brucei</i> | 42  | 316  | 357  |
| Tbg972.11.17700 | <i>T. brucei</i> | 99  | 51   | 149  |
| Tbg972.11.17710 | <i>T. brucei</i> | 63  | 336  | 398  |
| Tbg972.11.17730 | <i>T. brucei</i> | 672 | 1    | 672  |
| Tbg972.11.17770 | <i>T. brucei</i> | 43  | 1    | 43   |
| Tbg972.11.17780 | <i>T. brucei</i> | 105 | 1    | 105  |
| Tbg972.11.17780 | <i>T. brucei</i> | 67  | 227  | 293  |
| Tbg972.11.17780 | <i>T. brucei</i> | 52  | 488  | 539  |
| Tbg972.11.17780 | <i>T. brucei</i> | 108 | 576  | 683  |
| Tbg972.11.17790 | <i>T. brucei</i> | 44  | 1    | 44   |



|                 |                  |     |     |     |
|-----------------|------------------|-----|-----|-----|
| Tbg972.11.1780  | <i>T. brucei</i> | 43  | 16  | 58  |
| Tbg972.11.17800 | <i>T. brucei</i> | 44  | 288 | 331 |
| Tbg972.11.17870 | <i>T. brucei</i> | 70  | 267 | 336 |
| Tbg972.11.17870 | <i>T. brucei</i> | 42  | 616 | 657 |
| Tbg972.11.17880 | <i>T. brucei</i> | 53  | 1   | 53  |
| Tbg972.11.17890 | <i>T. brucei</i> | 53  | 1   | 53  |
| Tbg972.11.17900 | <i>T. brucei</i> | 72  | 196 | 267 |
| Tbg972.11.17900 | <i>T. brucei</i> | 84  | 836 | 919 |
| Tbg972.11.17900 | <i>T. brucei</i> | 84  | 836 | 919 |
| Tbg972.11.17910 | <i>T. brucei</i> | 275 | 134 | 408 |
| Tbg972.11.17910 | <i>T. brucei</i> | 53  | 448 | 500 |
| Tbg972.11.17920 | <i>T. brucei</i> | 108 | 853 | 960 |
| Tbg972.11.17930 | <i>T. brucei</i> | 98  | 1   | 98  |
| Tbg972.11.17940 | <i>T. brucei</i> | 86  | 1   | 86  |
| Tbg972.11.17940 | <i>T. brucei</i> | 40  | 103 | 142 |
| Tbg972.11.17950 | <i>T. brucei</i> | 120 | 1   | 120 |
| Tbg972.11.17950 | <i>T. brucei</i> | 71  | 182 | 252 |
| Tbg972.11.17970 | <i>T. brucei</i> | 41  | 138 | 178 |
| Tbg972.11.17980 | <i>T. brucei</i> | 175 | 107 | 281 |
| Tbg972.11.17980 | <i>T. brucei</i> | 69  | 318 | 386 |
| Tbg972.11.17980 | <i>T. brucei</i> | 69  | 318 | 386 |
| Tbg972.11.17990 | <i>T. brucei</i> | 175 | 152 | 326 |
| Tbg972.11.17990 | <i>T. brucei</i> | 51  | 526 | 576 |
| Tbg972.11.180   | <i>T. brucei</i> | 66  | 22  | 87  |
| Tbg972.11.1800  | <i>T. brucei</i> | 51  | 179 | 229 |
| Tbg972.11.1800  | <i>T. brucei</i> | 56  | 799 | 854 |
| Tbg972.11.1800  | <i>T. brucei</i> | 56  | 799 | 854 |
| Tbg972.11.18000 | <i>T. brucei</i> | 55  | 195 | 249 |
| Tbg972.11.18000 | <i>T. brucei</i> | 49  | 401 | 449 |
| Tbg972.11.18030 | <i>T. brucei</i> | 50  | 1   | 50  |
| Tbg972.11.18030 | <i>T. brucei</i> | 59  | 158 | 216 |
| Tbg972.11.18030 | <i>T. brucei</i> | 58  | 240 | 297 |
| Tbg972.11.18030 | <i>T. brucei</i> | 46  | 334 | 379 |
| Tbg972.11.18030 | <i>T. brucei</i> | 77  | 454 | 530 |
| Tbg972.11.18030 | <i>T. brucei</i> | 63  | 572 | 634 |
| Tbg972.11.18040 | <i>T. brucei</i> | 44  | 1   | 44  |
| Tbg972.11.18120 | <i>T. brucei</i> | 74  | 55  | 128 |
| Tbg972.11.18130 | <i>T. brucei</i> | 73  | 1   | 73  |
| Tbg972.11.18150 | <i>T. brucei</i> | 41  | 62  | 102 |
| Tbg972.11.18170 | <i>T. brucei</i> | 70  | 194 | 263 |
| Tbg972.11.18170 | <i>T. brucei</i> | 70  | 308 | 377 |
| Tbg972.11.18170 | <i>T. brucei</i> | 70  | 308 | 377 |
| Tbg972.11.18190 | <i>T. brucei</i> | 106 | 27  | 132 |
| Tbg972.11.1820  | <i>T. brucei</i> | 42  | 170 | 211 |
| Tbg972.11.1820  | <i>T. brucei</i> | 302 | 269 | 570 |
| Tbg972.11.18200 | <i>T. brucei</i> | 53  | 84  | 136 |
| Tbg972.11.18210 | <i>T. brucei</i> | 47  | 141 | 187 |

|                 |                  |     |      |      |
|-----------------|------------------|-----|------|------|
| Tbg972.11.18220 | <i>T. brucei</i> | 63  | 849  | 911  |
| Tbg972.11.18250 | <i>T. brucei</i> | 96  | 78   | 173  |
| Tbg972.11.18250 | <i>T. brucei</i> | 57  | 1306 | 1362 |
| Tbg972.11.18250 | <i>T. brucei</i> | 57  | 1306 | 1362 |
| Tbg972.11.18270 | <i>T. brucei</i> | 42  | 707  | 748  |
| Tbg972.11.18280 | <i>T. brucei</i> | 63  | 198  | 260  |
| Tbg972.11.18310 | <i>T. brucei</i> | 59  | 1001 | 1059 |
| Tbg972.11.18320 | <i>T. brucei</i> | 58  | 1    | 58   |
| Tbg972.11.18330 | <i>T. brucei</i> | 50  | 601  | 650  |
| Tbg972.11.18330 | <i>T. brucei</i> | 57  | 820  | 876  |
| Tbg972.11.18330 | <i>T. brucei</i> | 57  | 884  | 940  |
| Tbg972.11.18350 | <i>T. brucei</i> | 52  | 661  | 712  |
| Tbg972.11.1840  | <i>T. brucei</i> | 72  | 143  | 214  |
| Tbg972.11.18410 | <i>T. brucei</i> | 40  | 115  | 154  |
| Tbg972.11.18410 | <i>T. brucei</i> | 48  | 314  | 361  |
| Tbg972.11.18410 | <i>T. brucei</i> | 48  | 314  | 361  |
| Tbg972.11.18420 | <i>T. brucei</i> | 52  | 37   | 88   |
| Tbg972.11.18440 | <i>T. brucei</i> | 42  | 21   | 62   |
| Tbg972.11.18440 | <i>T. brucei</i> | 251 | 74   | 324  |
| Tbg972.11.18490 | <i>T. brucei</i> | 59  | 1    | 59   |
| Tbg972.11.18490 | <i>T. brucei</i> | 44  | 90   | 133  |
| Tbg972.11.18500 | <i>T. brucei</i> | 48  | 95   | 142  |
| Tbg972.11.18500 | <i>T. brucei</i> | 41  | 200  | 240  |
| Tbg972.11.18500 | <i>T. brucei</i> | 41  | 343  | 383  |
| Tbg972.11.18500 | <i>T. brucei</i> | 47  | 551  | 597  |
| Tbg972.11.18500 | <i>T. brucei</i> | 43  | 627  | 669  |
| Tbg972.11.18500 | <i>T. brucei</i> | 66  | 677  | 742  |
| Tbg972.11.18510 | <i>T. brucei</i> | 147 | 39   | 185  |
| Tbg972.11.18510 | <i>T. brucei</i> | 554 | 203  | 756  |
| Tbg972.11.18540 | <i>T. brucei</i> | 44  | 358  | 401  |
| Tbg972.11.18550 | <i>T. brucei</i> | 214 | 108  | 321  |
| Tbg972.11.18580 | <i>T. brucei</i> | 49  | 1    | 49   |
| Tbg972.11.18580 | <i>T. brucei</i> | 43  | 107  | 149  |
| Tbg972.11.18580 | <i>T. brucei</i> | 65  | 221  | 285  |
| Tbg972.11.18580 | <i>T. brucei</i> | 57  | 588  | 644  |
| Tbg972.11.18580 | <i>T. brucei</i> | 60  | 970  | 1029 |
| Tbg972.11.18600 | <i>T. brucei</i> | 46  | 66   | 111  |
| Tbg972.11.18610 | <i>T. brucei</i> | 319 | 1    | 319  |
| Tbg972.11.18610 | <i>T. brucei</i> | 108 | 343  | 450  |
| Tbg972.11.18610 | <i>T. brucei</i> | 60  | 562  | 621  |
| Tbg972.11.18660 | <i>T. brucei</i> | 68  | 93   | 160  |
| Tbg972.11.18670 | <i>T. brucei</i> | 66  | 1    | 66   |
| Tbg972.11.18670 | <i>T. brucei</i> | 53  | 438  | 490  |
| Tbg972.11.18670 | <i>T. brucei</i> | 53  | 438  | 490  |
| Tbg972.11.18680 | <i>T. brucei</i> | 87  | 70   | 156  |
| Tbg972.11.18690 | <i>T. brucei</i> | 117 | 89   | 205  |
| Tbg972.11.1870  | <i>T. brucei</i> | 48  | 35   | 82   |

|                 |                  |     |     |     |
|-----------------|------------------|-----|-----|-----|
| Tbg972.11.18710 | <i>T. brucei</i> | 57  | 1   | 57  |
| Tbg972.11.18710 | <i>T. brucei</i> | 46  | 120 | 165 |
| Tbg972.11.18710 | <i>T. brucei</i> | 141 | 195 | 335 |
| Tbg972.11.18710 | <i>T. brucei</i> | 238 | 345 | 582 |
| Tbg972.11.18720 | <i>T. brucei</i> | 49  | 1   | 49  |
| Tbg972.11.18740 | <i>T. brucei</i> | 71  | 9   | 79  |
| Tbg972.11.18750 | <i>T. brucei</i> | 65  | 18  | 82  |
| Tbg972.11.18760 | <i>T. brucei</i> | 170 | 1   | 170 |
| Tbg972.11.18760 | <i>T. brucei</i> | 410 | 179 | 588 |
| Tbg972.11.18760 | <i>T. brucei</i> | 143 | 633 | 775 |
| Tbg972.11.18770 | <i>T. brucei</i> | 79  | 52  | 130 |
| Tbg972.11.18780 | <i>T. brucei</i> | 63  | 585 | 647 |
| Tbg972.11.1880  | <i>T. brucei</i> | 178 | 1   | 178 |
| Tbg972.11.1880  | <i>T. brucei</i> | 85  | 716 | 800 |
| Tbg972.11.18800 | <i>T. brucei</i> | 51  | 475 | 525 |
| Tbg972.11.18820 | <i>T. brucei</i> | 96  | 1   | 96  |
| Tbg972.11.18820 | <i>T. brucei</i> | 70  | 738 | 807 |
| Tbg972.11.18820 | <i>T. brucei</i> | 70  | 738 | 807 |
| Tbg972.11.18830 | <i>T. brucei</i> | 49  | 211 | 259 |
| Tbg972.11.18830 | <i>T. brucei</i> | 45  | 641 | 685 |
| Tbg972.11.18830 | <i>T. brucei</i> | 126 | 838 | 963 |
| Tbg972.11.18840 | <i>T. brucei</i> | 54  | 188 | 241 |
| Tbg972.11.18860 | <i>T. brucei</i> | 79  | 1   | 79  |
| Tbg972.11.18860 | <i>T. brucei</i> | 69  | 240 | 308 |
| Tbg972.11.18880 | <i>T. brucei</i> | 75  | 58  | 132 |
| Tbg972.11.18890 | <i>T. brucei</i> | 74  | 161 | 234 |
| Tbg972.11.1890  | <i>T. brucei</i> | 213 | 115 | 327 |
| Tbg972.11.18950 | <i>T. brucei</i> | 80  | 311 | 390 |
| Tbg972.11.18950 | <i>T. brucei</i> | 246 | 412 | 657 |
| Tbg972.11.18960 | <i>T. brucei</i> | 42  | 380 | 421 |
| Tbg972.11.18970 | <i>T. brucei</i> | 65  | 1   | 65  |
| Tbg972.11.18970 | <i>T. brucei</i> | 90  | 327 | 416 |
| Tbg972.11.18980 | <i>T. brucei</i> | 114 | 1   | 114 |
| Tbg972.11.18980 | <i>T. brucei</i> | 73  | 222 | 294 |
| Tbg972.11.18980 | <i>T. brucei</i> | 73  | 222 | 294 |
| Tbg972.11.190   | <i>T. brucei</i> | 82  | 371 | 452 |
| Tbg972.11.190   | <i>T. brucei</i> | 191 | 501 | 691 |
| Tbg972.11.19000 | <i>T. brucei</i> | 77  | 39  | 115 |
| Tbg972.11.19000 | <i>T. brucei</i> | 68  | 171 | 238 |
| Tbg972.11.19000 | <i>T. brucei</i> | 69  | 383 | 451 |
| Tbg972.11.19000 | <i>T. brucei</i> | 58  | 831 | 888 |
| Tbg972.11.19010 | <i>T. brucei</i> | 43  | 27  | 69  |
| Tbg972.11.19040 | <i>T. brucei</i> | 101 | 24  | 124 |
| Tbg972.11.19040 | <i>T. brucei</i> | 109 | 211 | 319 |
| Tbg972.11.19040 | <i>T. brucei</i> | 57  | 462 | 518 |
| Tbg972.11.19050 | <i>T. brucei</i> | 53  | 1   | 53  |
| Tbg972.11.19050 | <i>T. brucei</i> | 641 | 265 | 905 |

|                 |                  |     |      |      |
|-----------------|------------------|-----|------|------|
| Tbg972.11.19050 | <i>T. brucei</i> | 46  | 956  | 1001 |
| Tbg972.11.19050 | <i>T. brucei</i> | 117 | 1057 | 1173 |
| Tbg972.11.19050 | <i>T. brucei</i> | 160 | 1268 | 1427 |
| Tbg972.11.19050 | <i>T. brucei</i> | 66  | 1565 | 1630 |
| Tbg972.11.19050 | <i>T. brucei</i> | 280 | 1764 | 2043 |
| Tbg972.11.19060 | <i>T. brucei</i> | 53  | 1    | 53   |
| Tbg972.11.19060 | <i>T. brucei</i> | 86  | 269  | 354  |
| Tbg972.11.19060 | <i>T. brucei</i> | 86  | 269  | 354  |
| Tbg972.11.19070 | <i>T. brucei</i> | 51  | 390  | 440  |
| Tbg972.11.1910  | <i>T. brucei</i> | 95  | 132  | 226  |
| Tbg972.11.19110 | <i>T. brucei</i> | 53  | 59   | 111  |
| Tbg972.11.19130 | <i>T. brucei</i> | 72  | 1    | 72   |
| Tbg972.11.19130 | <i>T. brucei</i> | 87  | 193  | 279  |
| Tbg972.11.19130 | <i>T. brucei</i> | 87  | 193  | 279  |
| Tbg972.11.19150 | <i>T. brucei</i> | 52  | 35   | 86   |
| Tbg972.11.19150 | <i>T. brucei</i> | 50  | 174  | 223  |
| Tbg972.11.19150 | <i>T. brucei</i> | 115 | 709  | 823  |
| Tbg972.11.19170 | <i>T. brucei</i> | 174 | 80   | 253  |
| Tbg972.11.19180 | <i>T. brucei</i> | 44  | 8    | 51   |
| Tbg972.11.19180 | <i>T. brucei</i> | 80  | 400  | 479  |
| Tbg972.11.19180 | <i>T. brucei</i> | 61  | 520  | 580  |
| Tbg972.11.19180 | <i>T. brucei</i> | 41  | 615  | 655  |
| Tbg972.11.19190 | <i>T. brucei</i> | 169 | 800  | 968  |
| Tbg972.11.19220 | <i>T. brucei</i> | 66  | 747  | 812  |
| Tbg972.11.19230 | <i>T. brucei</i> | 113 | 1    | 113  |
| Tbg972.11.1950  | <i>T. brucei</i> | 144 | 1    | 144  |
| Tbg972.11.1950  | <i>T. brucei</i> | 132 | 187  | 318  |
| Tbg972.11.1960  | <i>T. brucei</i> | 163 | 1    | 163  |
| Tbg972.11.1960  | <i>T. brucei</i> | 66  | 518  | 583  |
| Tbg972.11.1970  | <i>T. brucei</i> | 78  | 339  | 416  |
| Tbg972.11.1980  | <i>T. brucei</i> | 52  | 1    | 52   |
| Tbg972.11.1980  | <i>T. brucei</i> | 82  | 159  | 240  |
| Tbg972.11.1980  | <i>T. brucei</i> | 55  | 276  | 330  |
| Tbg972.11.1980  | <i>T. brucei</i> | 61  | 339  | 399  |
| Tbg972.11.1990  | <i>T. brucei</i> | 107 | 172  | 278  |
| Tbg972.11.1990  | <i>T. brucei</i> | 97  | 399  | 495  |
| Tbg972.11.20    | <i>T. brucei</i> | 65  | 1    | 65   |
| Tbg972.11.210   | <i>T. brucei</i> | 42  | 93   | 134  |
| Tbg972.11.210   | <i>T. brucei</i> | 99  | 327  | 425  |
| Tbg972.11.210   | <i>T. brucei</i> | 96  | 438  | 533  |
| Tbg972.11.210   | <i>T. brucei</i> | 129 | 686  | 814  |
| Tbg972.11.210   | <i>T. brucei</i> | 132 | 853  | 984  |
| Tbg972.11.2100  | <i>T. brucei</i> | 45  | 103  | 147  |
| Tbg972.11.2110  | <i>T. brucei</i> | 182 | 1    | 182  |
| Tbg972.11.2110  | <i>T. brucei</i> | 71  | 376  | 446  |
| Tbg972.11.2150  | <i>T. brucei</i> | 150 | 30   | 179  |
| Tbg972.11.2170  | <i>T. brucei</i> | 51  | 489  | 539  |

|                |                  |     |      |      |
|----------------|------------------|-----|------|------|
| Tbg972.11.2180 | <i>T. brucei</i> | 59  | 1    | 59   |
| Tbg972.11.2190 | <i>T. brucei</i> | 42  | 493  | 534  |
| Tbg972.11.220  | <i>T. brucei</i> | 155 | 38   | 192  |
| Tbg972.11.220  | <i>T. brucei</i> | 138 | 233  | 370  |
| Tbg972.11.220  | <i>T. brucei</i> | 79  | 618  | 696  |
| Tbg972.11.2220 | <i>T. brucei</i> | 50  | 18   | 67   |
| Tbg972.11.2220 | <i>T. brucei</i> | 268 | 175  | 442  |
| Tbg972.11.2220 | <i>T. brucei</i> | 103 | 466  | 568  |
| Tbg972.11.2230 | <i>T. brucei</i> | 45  | 1    | 45   |
| Tbg972.11.2230 | <i>T. brucei</i> | 149 | 66   | 214  |
| Tbg972.11.2230 | <i>T. brucei</i> | 245 | 507  | 751  |
| Tbg972.11.2240 | <i>T. brucei</i> | 49  | 277  | 325  |
| Tbg972.11.2250 | <i>T. brucei</i> | 49  | 277  | 325  |
| Tbg972.11.2290 | <i>T. brucei</i> | 43  | 66   | 108  |
| Tbg972.11.230  | <i>T. brucei</i> | 73  | 363  | 435  |
| Tbg972.11.2300 | <i>T. brucei</i> | 53  | 44   | 96   |
| Tbg972.11.2300 | <i>T. brucei</i> | 40  | 261  | 300  |
| Tbg972.11.2300 | <i>T. brucei</i> | 40  | 261  | 300  |
| Tbg972.11.2310 | <i>T. brucei</i> | 214 | 1    | 214  |
| Tbg972.11.2320 | <i>T. brucei</i> | 164 | 625  | 788  |
| Tbg972.11.2330 | <i>T. brucei</i> | 51  | 348  | 398  |
| Tbg972.11.2340 | <i>T. brucei</i> | 169 | 1    | 169  |
| Tbg972.11.2340 | <i>T. brucei</i> | 75  | 605  | 679  |
| Tbg972.11.2340 | <i>T. brucei</i> | 194 | 792  | 985  |
| Tbg972.11.2350 | <i>T. brucei</i> | 49  | 211  | 259  |
| Tbg972.11.2350 | <i>T. brucei</i> | 105 | 391  | 495  |
| Tbg972.11.2350 | <i>T. brucei</i> | 105 | 391  | 495  |
| Tbg972.11.2380 | <i>T. brucei</i> | 41  | 283  | 323  |
| Tbg972.11.2400 | <i>T. brucei</i> | 56  | 77   | 132  |
| Tbg972.11.2410 | <i>T. brucei</i> | 43  | 681  | 723  |
| Tbg972.11.2410 | <i>T. brucei</i> | 91  | 924  | 1014 |
| Tbg972.11.2410 | <i>T. brucei</i> | 91  | 924  | 1014 |
| Tbg972.11.2440 | <i>T. brucei</i> | 49  | 88   | 136  |
| Tbg972.11.2440 | <i>T. brucei</i> | 107 | 220  | 326  |
| Tbg972.11.2440 | <i>T. brucei</i> | 107 | 220  | 326  |
| Tbg972.11.2480 | <i>T. brucei</i> | 241 | 1    | 241  |
| Tbg972.11.2520 | <i>T. brucei</i> | 47  | 358  | 404  |
| Tbg972.11.2530 | <i>T. brucei</i> | 51  | 392  | 442  |
| Tbg972.11.2530 | <i>T. brucei</i> | 111 | 578  | 688  |
| Tbg972.11.2530 | <i>T. brucei</i> | 129 | 734  | 862  |
| Tbg972.11.2540 | <i>T. brucei</i> | 781 | 276  | 1056 |
| Tbg972.11.2540 | <i>T. brucei</i> | 173 | 1077 | 1249 |
| Tbg972.11.2560 | <i>T. brucei</i> | 257 | 50   | 306  |
| Tbg972.11.2560 | <i>T. brucei</i> | 147 | 327  | 473  |
| Tbg972.11.2560 | <i>T. brucei</i> | 358 | 506  | 863  |
| Tbg972.11.2580 | <i>T. brucei</i> | 68  | 12   | 79   |
| Tbg972.11.2580 | <i>T. brucei</i> | 43  | 308  | 350  |

|                |                  |     |      |      |
|----------------|------------------|-----|------|------|
| Tbg972.11.2580 | <i>T. brucei</i> | 43  | 308  | 350  |
| Tbg972.11.2590 | <i>T. brucei</i> | 113 | 1    | 113  |
| Tbg972.11.260  | <i>T. brucei</i> | 121 | 244  | 364  |
| Tbg972.11.260  | <i>T. brucei</i> | 149 | 503  | 651  |
| Tbg972.11.260  | <i>T. brucei</i> | 63  | 721  | 783  |
| Tbg972.11.2600 | <i>T. brucei</i> | 66  | 1    | 66   |
| Tbg972.11.2600 | <i>T. brucei</i> | 147 | 88   | 234  |
| Tbg972.11.2620 | <i>T. brucei</i> | 43  | 379  | 421  |
| Tbg972.11.2650 | <i>T. brucei</i> | 46  | 64   | 109  |
| Tbg972.11.2660 | <i>T. brucei</i> | 44  | 129  | 172  |
| Tbg972.11.2680 | <i>T. brucei</i> | 54  | 166  | 219  |
| Tbg972.11.2680 | <i>T. brucei</i> | 80  | 1051 | 1130 |
| Tbg972.11.2680 | <i>T. brucei</i> | 136 | 2882 | 3017 |
| Tbg972.11.2680 | <i>T. brucei</i> | 87  | 3115 | 3201 |
| Tbg972.11.2680 | <i>T. brucei</i> | 55  | 3418 | 3472 |
| Tbg972.11.2680 | <i>T. brucei</i> | 53  | 4199 | 4251 |
| Tbg972.11.2690 | <i>T. brucei</i> | 63  | 444  | 506  |
| Tbg972.11.2700 | <i>T. brucei</i> | 168 | 141  | 308  |
| Tbg972.11.2730 | <i>T. brucei</i> | 108 | 398  | 505  |
| Tbg972.11.2730 | <i>T. brucei</i> | 92  | 616  | 707  |
| Tbg972.11.2730 | <i>T. brucei</i> | 53  | 714  | 766  |
| Tbg972.11.2730 | <i>T. brucei</i> | 56  | 1192 | 1247 |
| Tbg972.11.2730 | <i>T. brucei</i> | 63  | 1446 | 1508 |
| Tbg972.11.2750 | <i>T. brucei</i> | 77  | 1    | 77   |
| Tbg972.11.2750 | <i>T. brucei</i> | 54  | 546  | 599  |
| Tbg972.11.2750 | <i>T. brucei</i> | 66  | 992  | 1057 |
| Tbg972.11.2750 | <i>T. brucei</i> | 93  | 1068 | 1160 |
| Tbg972.11.2750 | <i>T. brucei</i> | 59  | 1169 | 1227 |
| Tbg972.11.2750 | <i>T. brucei</i> | 46  | 1247 | 1292 |
| Tbg972.11.2770 | <i>T. brucei</i> | 64  | 110  | 173  |
| Tbg972.11.2770 | <i>T. brucei</i> | 47  | 353  | 399  |
| Tbg972.11.2770 | <i>T. brucei</i> | 68  | 464  | 531  |
| Tbg972.11.2790 | <i>T. brucei</i> | 51  | 196  | 246  |
| Tbg972.11.2790 | <i>T. brucei</i> | 42  | 445  | 486  |
| Tbg972.11.2790 | <i>T. brucei</i> | 42  | 445  | 486  |
| Tbg972.11.280  | <i>T. brucei</i> | 119 | 1    | 119  |
| Tbg972.11.280  | <i>T. brucei</i> | 42  | 158  | 199  |
| Tbg972.11.280  | <i>T. brucei</i> | 79  | 207  | 285  |
| Tbg972.11.280  | <i>T. brucei</i> | 91  | 319  | 409  |
| Tbg972.11.280  | <i>T. brucei</i> | 54  | 455  | 508  |
| Tbg972.11.280  | <i>T. brucei</i> | 54  | 624  | 677  |
| Tbg972.11.2800 | <i>T. brucei</i> | 50  | 51   | 100  |
| Tbg972.11.2810 | <i>T. brucei</i> | 106 | 239  | 344  |
| Tbg972.11.2810 | <i>T. brucei</i> | 56  | 459  | 514  |
| Tbg972.11.2810 | <i>T. brucei</i> | 56  | 459  | 514  |
| Tbg972.11.2840 | <i>T. brucei</i> | 68  | 1    | 68   |
| Tbg972.11.2840 | <i>T. brucei</i> | 40  | 306  | 345  |

|                |                  |     |     |      |
|----------------|------------------|-----|-----|------|
| Tbg972.11.2840 | <i>T. brucei</i> | 40  | 448 | 487  |
| Tbg972.11.2840 | <i>T. brucei</i> | 71  | 801 | 871  |
| Tbg972.11.2840 | <i>T. brucei</i> | 98  | 984 | 1081 |
| Tbg972.11.2850 | <i>T. brucei</i> | 76  | 159 | 234  |
| Tbg972.11.2850 | <i>T. brucei</i> | 44  | 258 | 301  |
| Tbg972.11.2850 | <i>T. brucei</i> | 47  | 377 | 423  |
| Tbg972.11.2850 | <i>T. brucei</i> | 43  | 504 | 546  |
| Tbg972.11.2850 | <i>T. brucei</i> | 41  | 571 | 611  |
| Tbg972.11.2850 | <i>T. brucei</i> | 237 | 693 | 929  |
| Tbg972.11.2860 | <i>T. brucei</i> | 72  | 1   | 72   |
| Tbg972.11.2860 | <i>T. brucei</i> | 117 | 129 | 245  |
| Tbg972.11.2860 | <i>T. brucei</i> | 162 | 301 | 462  |
| Tbg972.11.2880 | <i>T. brucei</i> | 53  | 1   | 53   |
| Tbg972.11.2890 | <i>T. brucei</i> | 98  | 1   | 98   |
| Tbg972.11.290  | <i>T. brucei</i> | 76  | 13  | 88   |
| Tbg972.11.2900 | <i>T. brucei</i> | 51  | 1   | 51   |
| Tbg972.11.2900 | <i>T. brucei</i> | 60  | 60  | 119  |
| Tbg972.11.2920 | <i>T. brucei</i> | 101 | 289 | 389  |
| Tbg972.11.2920 | <i>T. brucei</i> | 95  | 405 | 499  |
| Tbg972.11.2940 | <i>T. brucei</i> | 145 | 186 | 330  |
| Tbg972.11.2950 | <i>T. brucei</i> | 51  | 63  | 113  |
| Tbg972.11.2950 | <i>T. brucei</i> | 48  | 442 | 489  |
| Tbg972.11.2950 | <i>T. brucei</i> | 46  | 610 | 655  |
| Tbg972.11.2990 | <i>T. brucei</i> | 96  | 103 | 198  |
| Tbg972.11.2990 | <i>T. brucei</i> | 65  | 271 | 335  |
| Tbg972.11.2990 | <i>T. brucei</i> | 40  | 430 | 469  |
| Tbg972.11.2990 | <i>T. brucei</i> | 103 | 516 | 618  |
| Tbg972.11.300  | <i>T. brucei</i> | 52  | 1   | 52   |
| Tbg972.11.3000 | <i>T. brucei</i> | 49  | 17  | 65   |
| Tbg972.11.3010 | <i>T. brucei</i> | 83  | 141 | 223  |
| Tbg972.11.3010 | <i>T. brucei</i> | 40  | 503 | 542  |
| Tbg972.11.3020 | <i>T. brucei</i> | 162 | 108 | 269  |
| Tbg972.11.3050 | <i>T. brucei</i> | 734 | 1   | 734  |
| Tbg972.11.3060 | <i>T. brucei</i> | 51  | 140 | 190  |
| Tbg972.11.3060 | <i>T. brucei</i> | 68  | 269 | 336  |
| Tbg972.11.3060 | <i>T. brucei</i> | 68  | 269 | 336  |
| Tbg972.11.3080 | <i>T. brucei</i> | 51  | 55  | 105  |
| Tbg972.11.3080 | <i>T. brucei</i> | 166 | 405 | 570  |
| Tbg972.11.3090 | <i>T. brucei</i> | 82  | 46  | 127  |
| Tbg972.11.3090 | <i>T. brucei</i> | 110 | 193 | 302  |
| Tbg972.11.3090 | <i>T. brucei</i> | 55  | 328 | 382  |
| Tbg972.11.3090 | <i>T. brucei</i> | 49  | 492 | 540  |
| Tbg972.11.310  | <i>T. brucei</i> | 70  | 1   | 70   |
| Tbg972.11.310  | <i>T. brucei</i> | 70  | 105 | 174  |
| Tbg972.11.3110 | <i>T. brucei</i> | 180 | 87  | 266  |
| Tbg972.11.3130 | <i>T. brucei</i> | 246 | 79  | 324  |
| Tbg972.11.3130 | <i>T. brucei</i> | 89  | 713 | 801  |

|                |                  |     |      |      |
|----------------|------------------|-----|------|------|
| Tbg972.11.3150 | <i>T. brucei</i> | 41  | 84   | 124  |
| Tbg972.11.3150 | <i>T. brucei</i> | 122 | 174  | 295  |
| Tbg972.11.3150 | <i>T. brucei</i> | 62  | 475  | 536  |
| Tbg972.11.3150 | <i>T. brucei</i> | 93  | 579  | 671  |
| Tbg972.11.3150 | <i>T. brucei</i> | 90  | 858  | 947  |
| Tbg972.11.3150 | <i>T. brucei</i> | 79  | 958  | 1036 |
| Tbg972.11.3180 | <i>T. brucei</i> | 151 | 94   | 244  |
| Tbg972.11.3180 | <i>T. brucei</i> | 54  | 375  | 428  |
| Tbg972.11.3180 | <i>T. brucei</i> | 54  | 375  | 428  |
| Tbg972.11.3200 | <i>T. brucei</i> | 64  | 390  | 453  |
| Tbg972.11.3200 | <i>T. brucei</i> | 343 | 520  | 862  |
| Tbg972.11.3210 | <i>T. brucei</i> | 55  | 1    | 55   |
| Tbg972.11.3210 | <i>T. brucei</i> | 42  | 113  | 154  |
| Tbg972.11.3210 | <i>T. brucei</i> | 121 | 260  | 380  |
| Tbg972.11.3210 | <i>T. brucei</i> | 166 | 478  | 643  |
| Tbg972.11.3220 | <i>T. brucei</i> | 97  | 27   | 123  |
| Tbg972.11.3230 | <i>T. brucei</i> | 87  | 38   | 124  |
| Tbg972.11.3240 | <i>T. brucei</i> | 72  | 79   | 150  |
| Tbg972.11.3290 | <i>T. brucei</i> | 119 | 1    | 119  |
| Tbg972.11.3310 | <i>T. brucei</i> | 44  | 1    | 44   |
| Tbg972.11.3330 | <i>T. brucei</i> | 48  | 513  | 560  |
| Tbg972.11.3340 | <i>T. brucei</i> | 149 | 1    | 149  |
| Tbg972.11.3360 | <i>T. brucei</i> | 66  | 114  | 179  |
| Tbg972.11.3370 | <i>T. brucei</i> | 65  | 127  | 191  |
| Tbg972.11.3370 | <i>T. brucei</i> | 45  | 315  | 359  |
| Tbg972.11.3370 | <i>T. brucei</i> | 45  | 315  | 359  |
| Tbg972.11.3390 | <i>T. brucei</i> | 145 | 1    | 145  |
| Tbg972.11.3390 | <i>T. brucei</i> | 50  | 214  | 263  |
| Tbg972.11.340  | <i>T. brucei</i> | 122 | 1    | 122  |
| Tbg972.11.340  | <i>T. brucei</i> | 56  | 161  | 216  |
| Tbg972.11.3400 | <i>T. brucei</i> | 53  | 60   | 112  |
| Tbg972.11.3420 | <i>T. brucei</i> | 42  | 293  | 334  |
| Tbg972.11.3440 | <i>T. brucei</i> | 60  | 368  | 427  |
| Tbg972.11.3440 | <i>T. brucei</i> | 209 | 447  | 655  |
| Tbg972.11.3470 | <i>T. brucei</i> | 47  | 54   | 100  |
| Tbg972.11.3480 | <i>T. brucei</i> | 41  | 415  | 455  |
| Tbg972.11.3490 | <i>T. brucei</i> | 56  | 149  | 204  |
| Tbg972.11.350  | <i>T. brucei</i> | 41  | 26   | 66   |
| Tbg972.11.3540 | <i>T. brucei</i> | 147 | 290  | 436  |
| Tbg972.11.3540 | <i>T. brucei</i> | 128 | 1523 | 1650 |
| Tbg972.11.3570 | <i>T. brucei</i> | 45  | 64   | 108  |
| Tbg972.11.360  | <i>T. brucei</i> | 222 | 119  | 340  |
| Tbg972.11.360  | <i>T. brucei</i> | 85  | 342  | 426  |
| Tbg972.11.360  | <i>T. brucei</i> | 181 | 641  | 821  |
| Tbg972.11.3600 | <i>T. brucei</i> | 76  | 1    | 76   |
| Tbg972.11.3620 | <i>T. brucei</i> | 52  | 802  | 853  |
| Tbg972.11.3620 | <i>T. brucei</i> | 59  | 1360 | 1418 |



|                |                  |     |      |      |
|----------------|------------------|-----|------|------|
| Tbg972.11.3620 | <i>T. brucei</i> | 75  | 3155 | 3229 |
| Tbg972.11.3620 | <i>T. brucei</i> | 59  | 3356 | 3414 |
| Tbg972.11.3620 | <i>T. brucei</i> | 96  | 4069 | 4164 |
| Tbg972.11.3620 | <i>T. brucei</i> | 52  | 4375 | 4426 |
| Tbg972.11.3630 | <i>T. brucei</i> | 67  | 1    | 67   |
| Tbg972.11.3650 | <i>T. brucei</i> | 129 | 64   | 192  |
| Tbg972.11.3650 | <i>T. brucei</i> | 157 | 497  | 653  |
| Tbg972.11.3670 | <i>T. brucei</i> | 52  | 1    | 52   |
| Tbg972.11.3670 | <i>T. brucei</i> | 40  | 86   | 125  |
| Tbg972.11.3670 | <i>T. brucei</i> | 95  | 261  | 355  |
| Tbg972.11.3670 | <i>T. brucei</i> | 52  | 383  | 434  |
| Tbg972.11.3670 | <i>T. brucei</i> | 77  | 491  | 567  |
| Tbg972.11.3670 | <i>T. brucei</i> | 45  | 614  | 658  |
| Tbg972.11.3670 | <i>T. brucei</i> | 121 | 664  | 784  |
| Tbg972.11.3670 | <i>T. brucei</i> | 104 | 815  | 918  |
| Tbg972.11.3670 | <i>T. brucei</i> | 121 | 972  | 1092 |
| Tbg972.11.3670 | <i>T. brucei</i> | 54  | 1225 | 1278 |
| Tbg972.11.3670 | <i>T. brucei</i> | 81  | 1297 | 1377 |
| Tbg972.11.3690 | <i>T. brucei</i> | 831 | 1    | 831  |
| Tbg972.11.3700 | <i>T. brucei</i> | 47  | 1    | 47   |
| Tbg972.11.3760 | <i>T. brucei</i> | 126 | 685  | 810  |
| Tbg972.11.3760 | <i>T. brucei</i> | 185 | 872  | 1056 |
| Tbg972.11.3770 | <i>T. brucei</i> | 50  | 147  | 196  |
| Tbg972.11.3780 | <i>T. brucei</i> | 48  | 1081 | 1128 |
| Tbg972.11.3790 | <i>T. brucei</i> | 83  | 65   | 147  |
| Tbg972.11.380  | <i>T. brucei</i> | 41  | 191  | 231  |
| Tbg972.11.380  | <i>T. brucei</i> | 132 | 269  | 400  |
| Tbg972.11.380  | <i>T. brucei</i> | 59  | 456  | 514  |
| Tbg972.11.3800 | <i>T. brucei</i> | 72  | 135  | 206  |
| Tbg972.11.3800 | <i>T. brucei</i> | 177 | 255  | 431  |
| Tbg972.11.3800 | <i>T. brucei</i> | 68  | 466  | 533  |
| Tbg972.11.3800 | <i>T. brucei</i> | 56  | 854  | 909  |
| Tbg972.11.3830 | <i>T. brucei</i> | 77  | 1617 | 1693 |
| Tbg972.11.3830 | <i>T. brucei</i> | 81  | 2030 | 2110 |
| Tbg972.11.3830 | <i>T. brucei</i> | 48  | 2606 | 2653 |
| Tbg972.11.3830 | <i>T. brucei</i> | 50  | 4339 | 4388 |
| Tbg972.11.3840 | <i>T. brucei</i> | 112 | 1    | 112  |
| Tbg972.11.3840 | <i>T. brucei</i> | 44  | 269  | 312  |
| Tbg972.11.3850 | <i>T. brucei</i> | 125 | 9    | 133  |
| Tbg972.11.3850 | <i>T. brucei</i> | 45  | 436  | 480  |
| Tbg972.11.3850 | <i>T. brucei</i> | 55  | 633  | 687  |
| Tbg972.11.3860 | <i>T. brucei</i> | 62  | 1    | 62   |
| Tbg972.11.3860 | <i>T. brucei</i> | 54  | 92   | 145  |
| Tbg972.11.3860 | <i>T. brucei</i> | 130 | 275  | 404  |
| Tbg972.11.3860 | <i>T. brucei</i> | 57  | 409  | 465  |
| Tbg972.11.3860 | <i>T. brucei</i> | 47  | 504  | 550  |
| Tbg972.11.3870 | <i>T. brucei</i> | 79  | 127  | 205  |

|                |                  |     |     |      |
|----------------|------------------|-----|-----|------|
| Tbg972.11.3890 | <i>T. brucei</i> | 429 | 102 | 530  |
| Tbg972.11.3910 | <i>T. brucei</i> | 40  | 130 | 169  |
| Tbg972.11.3930 | <i>T. brucei</i> | 55  | 84  | 138  |
| Tbg972.11.3940 | <i>T. brucei</i> | 80  | 65  | 144  |
| Tbg972.11.3950 | <i>T. brucei</i> | 109 | 451 | 559  |
| Tbg972.11.3960 | <i>T. brucei</i> | 70  | 187 | 256  |
| Tbg972.11.3960 | <i>T. brucei</i> | 94  | 488 | 581  |
| Tbg972.11.3960 | <i>T. brucei</i> | 65  | 617 | 681  |
| Tbg972.11.3960 | <i>T. brucei</i> | 48  | 724 | 771  |
| Tbg972.11.3960 | <i>T. brucei</i> | 122 | 848 | 969  |
| Tbg972.11.3980 | <i>T. brucei</i> | 85  | 1   | 85   |
| Tbg972.11.3980 | <i>T. brucei</i> | 74  | 349 | 422  |
| Tbg972.11.3980 | <i>T. brucei</i> | 180 | 486 | 665  |
| Tbg972.11.3980 | <i>T. brucei</i> | 47  | 721 | 767  |
| Tbg972.11.3980 | <i>T. brucei</i> | 79  | 772 | 850  |
| Tbg972.11.40   | <i>T. brucei</i> | 40  | 281 | 320  |
| Tbg972.11.4010 | <i>T. brucei</i> | 42  | 128 | 169  |
| Tbg972.11.4030 | <i>T. brucei</i> | 48  | 1   | 48   |
| Tbg972.11.4030 | <i>T. brucei</i> | 80  | 67  | 146  |
| Tbg972.11.4050 | <i>T. brucei</i> | 52  | 1   | 52   |
| Tbg972.11.4200 | <i>T. brucei</i> | 66  | 29  | 94   |
| Tbg972.11.4200 | <i>T. brucei</i> | 71  | 147 | 217  |
| Tbg972.11.4200 | <i>T. brucei</i> | 46  | 317 | 362  |
| Tbg972.11.4210 | <i>T. brucei</i> | 65  | 1   | 65   |
| Tbg972.11.4230 | <i>T. brucei</i> | 94  | 133 | 226  |
| Tbg972.11.4230 | <i>T. brucei</i> | 53  | 268 | 320  |
| Tbg972.11.4230 | <i>T. brucei</i> | 53  | 268 | 320  |
| Tbg972.11.4250 | <i>T. brucei</i> | 444 | 72  | 515  |
| Tbg972.11.4260 | <i>T. brucei</i> | 51  | 72  | 122  |
| Tbg972.11.4280 | <i>T. brucei</i> | 42  | 1   | 42   |
| Tbg972.11.4300 | <i>T. brucei</i> | 152 | 1   | 152  |
| Tbg972.11.4310 | <i>T. brucei</i> | 48  | 1   | 48   |
| Tbg972.11.4340 | <i>T. brucei</i> | 51  | 230 | 280  |
| Tbg972.11.4340 | <i>T. brucei</i> | 63  | 983 | 1045 |
| Tbg972.11.4340 | <i>T. brucei</i> | 63  | 983 | 1045 |
| Tbg972.11.4370 | <i>T. brucei</i> | 45  | 1   | 45   |
| Tbg972.11.4370 | <i>T. brucei</i> | 42  | 816 | 857  |
| Tbg972.11.4370 | <i>T. brucei</i> | 42  | 816 | 857  |
| Tbg972.11.4400 | <i>T. brucei</i> | 58  | 1   | 58   |
| Tbg972.11.4420 | <i>T. brucei</i> | 46  | 65  | 110  |
| Tbg972.11.4450 | <i>T. brucei</i> | 48  | 1   | 48   |
| Tbg972.11.4450 | <i>T. brucei</i> | 62  | 219 | 280  |
| Tbg972.11.4460 | <i>T. brucei</i> | 147 | 1   | 147  |
| Tbg972.11.4460 | <i>T. brucei</i> | 278 | 175 | 452  |
| Tbg972.11.4470 | <i>T. brucei</i> | 120 | 184 | 303  |
| Tbg972.11.4470 | <i>T. brucei</i> | 40  | 525 | 564  |
| Tbg972.11.4470 | <i>T. brucei</i> | 61  | 875 | 935  |

|                |                  |     |      |      |
|----------------|------------------|-----|------|------|
| Tbg972.11.4480 | <i>T. brucei</i> | 40  | 59   | 98   |
| Tbg972.11.4480 | <i>T. brucei</i> | 42  | 258  | 299  |
| Tbg972.11.4480 | <i>T. brucei</i> | 42  | 258  | 299  |
| Tbg972.11.4490 | <i>T. brucei</i> | 41  | 1    | 41   |
| Tbg972.11.4490 | <i>T. brucei</i> | 127 | 113  | 239  |
| Tbg972.11.450  | <i>T. brucei</i> | 61  | 1    | 61   |
| Tbg972.11.450  | <i>T. brucei</i> | 63  | 156  | 218  |
| Tbg972.11.4500 | <i>T. brucei</i> | 41  | 232  | 272  |
| Tbg972.11.4510 | <i>T. brucei</i> | 49  | 36   | 84   |
| Tbg972.11.4510 | <i>T. brucei</i> | 81  | 401  | 481  |
| Tbg972.11.4510 | <i>T. brucei</i> | 67  | 610  | 676  |
| Tbg972.11.4530 | <i>T. brucei</i> | 126 | 1    | 126  |
| Tbg972.11.4530 | <i>T. brucei</i> | 125 | 178  | 302  |
| Tbg972.11.4530 | <i>T. brucei</i> | 74  | 381  | 454  |
| Tbg972.11.4530 | <i>T. brucei</i> | 48  | 594  | 641  |
| Tbg972.11.4530 | <i>T. brucei</i> | 44  | 664  | 707  |
| Tbg972.11.4530 | <i>T. brucei</i> | 80  | 804  | 883  |
| Tbg972.11.4530 | <i>T. brucei</i> | 160 | 949  | 1108 |
| Tbg972.11.4540 | <i>T. brucei</i> | 42  | 66   | 107  |
| Tbg972.11.4540 | <i>T. brucei</i> | 162 | 186  | 347  |
| Tbg972.11.4540 | <i>T. brucei</i> | 94  | 547  | 640  |
| Tbg972.11.4550 | <i>T. brucei</i> | 174 | 1    | 174  |
| Tbg972.11.4550 | <i>T. brucei</i> | 62  | 239  | 300  |
| Tbg972.11.4550 | <i>T. brucei</i> | 55  | 341  | 395  |
| Tbg972.11.4560 | <i>T. brucei</i> | 49  | 273  | 321  |
| Tbg972.11.4570 | <i>T. brucei</i> | 100 | 100  | 199  |
| Tbg972.11.4570 | <i>T. brucei</i> | 68  | 238  | 305  |
| Tbg972.11.4580 | <i>T. brucei</i> | 50  | 199  | 248  |
| Tbg972.11.4590 | <i>T. brucei</i> | 190 | 98   | 287  |
| Tbg972.11.4590 | <i>T. brucei</i> | 331 | 395  | 725  |
| Tbg972.11.4600 | <i>T. brucei</i> | 60  | 270  | 329  |
| Tbg972.11.4610 | <i>T. brucei</i> | 83  | 95   | 177  |
| Tbg972.11.4610 | <i>T. brucei</i> | 117 | 197  | 313  |
| Tbg972.11.4620 | <i>T. brucei</i> | 146 | 1    | 146  |
| Tbg972.11.4620 | <i>T. brucei</i> | 44  | 231  | 274  |
| Tbg972.11.4620 | <i>T. brucei</i> | 76  | 348  | 423  |
| Tbg972.11.4620 | <i>T. brucei</i> | 65  | 439  | 503  |
| Tbg972.11.4630 | <i>T. brucei</i> | 76  | 5    | 80   |
| Tbg972.11.4630 | <i>T. brucei</i> | 68  | 110  | 177  |
| Tbg972.11.4630 | <i>T. brucei</i> | 51  | 281  | 331  |
| Tbg972.11.4630 | <i>T. brucei</i> | 103 | 353  | 455  |
| Tbg972.11.4630 | <i>T. brucei</i> | 63  | 485  | 547  |
| Tbg972.11.4630 | <i>T. brucei</i> | 129 | 550  | 678  |
| Tbg972.11.4630 | <i>T. brucei</i> | 56  | 727  | 782  |
| Tbg972.11.4630 | <i>T. brucei</i> | 67  | 1078 | 1144 |
| Tbg972.11.4650 | <i>T. brucei</i> | 258 | 1    | 258  |
| Tbg972.11.4650 | <i>T. brucei</i> | 66  | 299  | 364  |

|                |                  |     |      |      |
|----------------|------------------|-----|------|------|
| Tbg972.11.4650 | <i>T. brucei</i> | 83  | 391  | 473  |
| Tbg972.11.4650 | <i>T. brucei</i> | 50  | 475  | 524  |
| Tbg972.11.4650 | <i>T. brucei</i> | 232 | 580  | 811  |
| Tbg972.11.4650 | <i>T. brucei</i> | 69  | 817  | 885  |
| Tbg972.11.4650 | <i>T. brucei</i> | 173 | 991  | 1163 |
| Tbg972.11.4650 | <i>T. brucei</i> | 57  | 1216 | 1272 |
| Tbg972.11.4650 | <i>T. brucei</i> | 85  | 1532 | 1616 |
| Tbg972.11.4670 | <i>T. brucei</i> | 205 | 69   | 273  |
| Tbg972.11.4680 | <i>T. brucei</i> | 62  | 356  | 417  |
| Tbg972.11.4680 | <i>T. brucei</i> | 46  | 503  | 548  |
| Tbg972.11.4680 | <i>T. brucei</i> | 46  | 503  | 548  |
| Tbg972.11.4720 | <i>T. brucei</i> | 155 | 135  | 289  |
| Tbg972.11.4720 | <i>T. brucei</i> | 119 | 502  | 620  |
| Tbg972.11.4730 | <i>T. brucei</i> | 52  | 25   | 76   |
| Tbg972.11.4740 | <i>T. brucei</i> | 40  | 170  | 209  |
| Tbg972.11.4750 | <i>T. brucei</i> | 59  | 134  | 192  |
| Tbg972.11.4750 | <i>T. brucei</i> | 111 | 325  | 435  |
| Tbg972.11.4750 | <i>T. brucei</i> | 55  | 737  | 791  |
| Tbg972.11.4750 | <i>T. brucei</i> | 70  | 919  | 988  |
| Tbg972.11.4750 | <i>T. brucei</i> | 48  | 1060 | 1107 |
| Tbg972.11.4760 | <i>T. brucei</i> | 40  | 320  | 359  |
| Tbg972.11.4770 | <i>T. brucei</i> | 92  | 73   | 164  |
| Tbg972.11.4770 | <i>T. brucei</i> | 76  | 271  | 346  |
| Tbg972.11.4780 | <i>T. brucei</i> | 105 | 1    | 105  |
| Tbg972.11.4780 | <i>T. brucei</i> | 45  | 495  | 539  |
| Tbg972.11.4790 | <i>T. brucei</i> | 260 | 285  | 544  |
| Tbg972.11.480  | <i>T. brucei</i> | 42  | 134  | 175  |
| Tbg972.11.4800 | <i>T. brucei</i> | 46  | 515  | 560  |
| Tbg972.11.4810 | <i>T. brucei</i> | 98  | 134  | 231  |
| Tbg972.11.4820 | <i>T. brucei</i> | 45  | 669  | 713  |
| Tbg972.11.4820 | <i>T. brucei</i> | 104 | 1027 | 1130 |
| Tbg972.11.4820 | <i>T. brucei</i> | 50  | 1153 | 1202 |
| Tbg972.11.4830 | <i>T. brucei</i> | 113 | 62   | 174  |
| Tbg972.11.4840 | <i>T. brucei</i> | 127 | 1    | 127  |
| Tbg972.11.4840 | <i>T. brucei</i> | 43  | 160  | 202  |
| Tbg972.11.4890 | <i>T. brucei</i> | 126 | 39   | 164  |
| Tbg972.11.4890 | <i>T. brucei</i> | 141 | 523  | 663  |
| Tbg972.11.4890 | <i>T. brucei</i> | 123 | 733  | 855  |
| Tbg972.11.4890 | <i>T. brucei</i> | 54  | 948  | 1001 |
| Tbg972.11.4890 | <i>T. brucei</i> | 53  | 1262 | 1314 |
| Tbg972.11.4920 | <i>T. brucei</i> | 56  | 138  | 193  |
| Tbg972.11.4940 | <i>T. brucei</i> | 101 | 134  | 234  |
| Tbg972.11.4940 | <i>T. brucei</i> | 45  | 406  | 450  |
| Tbg972.11.4950 | <i>T. brucei</i> | 58  | 1    | 58   |
| Tbg972.11.4960 | <i>T. brucei</i> | 347 | 53   | 399  |
| Tbg972.11.4960 | <i>T. brucei</i> | 156 | 476  | 631  |
| Tbg972.11.4960 | <i>T. brucei</i> | 63  | 660  | 722  |

|                |                  |     |      |      |
|----------------|------------------|-----|------|------|
| Tbg972.11.4960 | <i>T. brucei</i> | 40  | 872  | 911  |
| Tbg972.11.4970 | <i>T. brucei</i> | 283 | 59   | 341  |
| Tbg972.11.4970 | <i>T. brucei</i> | 146 | 365  | 510  |
| Tbg972.11.4980 | <i>T. brucei</i> | 55  | 26   | 80   |
| Tbg972.11.4990 | <i>T. brucei</i> | 157 | 1    | 157  |
| Tbg972.11.4990 | <i>T. brucei</i> | 68  | 190  | 257  |
| Tbg972.11.500  | <i>T. brucei</i> | 78  | 1    | 78   |
| Tbg972.11.500  | <i>T. brucei</i> | 42  | 159  | 200  |
| Tbg972.11.5010 | <i>T. brucei</i> | 127 | 38   | 164  |
| Tbg972.11.5030 | <i>T. brucei</i> | 434 | 19   | 452  |
| Tbg972.11.5030 | <i>T. brucei</i> | 45  | 512  | 556  |
| Tbg972.11.5030 | <i>T. brucei</i> | 71  | 575  | 645  |
| Tbg972.11.5070 | <i>T. brucei</i> | 91  | 1    | 91   |
| Tbg972.11.5080 | <i>T. brucei</i> | 115 | 1    | 115  |
| Tbg972.11.5100 | <i>T. brucei</i> | 56  | 70   | 125  |
| Tbg972.11.5110 | <i>T. brucei</i> | 64  | 294  | 357  |
| Tbg972.11.5120 | <i>T. brucei</i> | 56  | 62   | 117  |
| Tbg972.11.5120 | <i>T. brucei</i> | 43  | 298  | 340  |
| Tbg972.11.5120 | <i>T. brucei</i> | 117 | 367  | 483  |
| Tbg972.11.5120 | <i>T. brucei</i> | 43  | 543  | 585  |
| Tbg972.11.5150 | <i>T. brucei</i> | 44  | 35   | 78   |
| Tbg972.11.5150 | <i>T. brucei</i> | 83  | 117  | 199  |
| Tbg972.11.5150 | <i>T. brucei</i> | 113 | 1678 | 1790 |
| Tbg972.11.5160 | <i>T. brucei</i> | 63  | 295  | 357  |
| Tbg972.11.5160 | <i>T. brucei</i> | 52  | 542  | 593  |
| Tbg972.11.5160 | <i>T. brucei</i> | 79  | 948  | 1026 |
| Tbg972.11.5160 | <i>T. brucei</i> | 57  | 1149 | 1205 |
| Tbg972.11.5170 | <i>T. brucei</i> | 75  | 193  | 267  |
| Tbg972.11.520  | <i>T. brucei</i> | 203 | 78   | 280  |
| Tbg972.11.5200 | <i>T. brucei</i> | 53  | 63   | 115  |
| Tbg972.11.5200 | <i>T. brucei</i> | 79  | 148  | 226  |
| Tbg972.11.5200 | <i>T. brucei</i> | 79  | 148  | 226  |
| Tbg972.11.5210 | <i>T. brucei</i> | 53  | 105  | 157  |
| Tbg972.11.5220 | <i>T. brucei</i> | 276 | 14   | 289  |
| Tbg972.11.5260 | <i>T. brucei</i> | 49  | 167  | 215  |
| Tbg972.11.5270 | <i>T. brucei</i> | 128 | 67   | 194  |
| Tbg972.11.5280 | <i>T. brucei</i> | 110 | 68   | 177  |
| Tbg972.11.5280 | <i>T. brucei</i> | 42  | 594  | 635  |
| Tbg972.11.5290 | <i>T. brucei</i> | 47  | 1281 | 1327 |
| Tbg972.11.5290 | <i>T. brucei</i> | 106 | 1416 | 1521 |
| Tbg972.11.530  | <i>T. brucei</i> | 76  | 1    | 76   |
| Tbg972.11.5300 | <i>T. brucei</i> | 94  | 328  | 421  |
| Tbg972.11.5300 | <i>T. brucei</i> | 124 | 497  | 620  |
| Tbg972.11.5310 | <i>T. brucei</i> | 61  | 1    | 61   |
| Tbg972.11.5320 | <i>T. brucei</i> | 64  | 286  | 349  |
| Tbg972.11.5330 | <i>T. brucei</i> | 41  | 1364 | 1404 |
| Tbg972.11.5350 | <i>T. brucei</i> | 62  | 274  | 335  |

|                |                  |     |     |     |
|----------------|------------------|-----|-----|-----|
| Tbg972.11.5350 | <i>T. brucei</i> | 60  | 383 | 442 |
| Tbg972.11.5360 | <i>T. brucei</i> | 182 | 1   | 182 |
| Tbg972.11.5370 | <i>T. brucei</i> | 116 | 44  | 159 |
| Tbg972.11.5370 | <i>T. brucei</i> | 141 | 180 | 320 |
| Tbg972.11.5380 | <i>T. brucei</i> | 45  | 85  | 129 |
| Tbg972.11.5380 | <i>T. brucei</i> | 100 | 175 | 274 |
| Tbg972.11.5380 | <i>T. brucei</i> | 54  | 310 | 363 |
| Tbg972.11.5390 | <i>T. brucei</i> | 331 | 1   | 331 |
| Tbg972.11.5420 | <i>T. brucei</i> | 217 | 276 | 492 |
| Tbg972.11.5430 | <i>T. brucei</i> | 67  | 10  | 76  |
| Tbg972.11.5440 | <i>T. brucei</i> | 41  | 126 | 166 |
| Tbg972.11.5450 | <i>T. brucei</i> | 47  | 73  | 119 |
| Tbg972.11.5460 | <i>T. brucei</i> | 80  | 306 | 385 |
| Tbg972.11.5470 | <i>T. brucei</i> | 44  | 10  | 53  |
| Tbg972.11.5470 | <i>T. brucei</i> | 80  | 197 | 276 |
| Tbg972.11.5470 | <i>T. brucei</i> | 54  | 390 | 443 |
| Tbg972.11.5480 | <i>T. brucei</i> | 54  | 413 | 466 |
| Tbg972.11.5500 | <i>T. brucei</i> | 134 | 1   | 134 |
| Tbg972.11.5500 | <i>T. brucei</i> | 74  | 176 | 249 |
| Tbg972.11.5530 | <i>T. brucei</i> | 57  | 235 | 291 |
| Tbg972.11.5540 | <i>T. brucei</i> | 61  | 113 | 173 |
| Tbg972.11.5550 | <i>T. brucei</i> | 65  | 47  | 111 |
| Tbg972.11.5570 | <i>T. brucei</i> | 48  | 9   | 56  |
| Tbg972.11.5570 | <i>T. brucei</i> | 127 | 660 | 786 |
| Tbg972.11.5590 | <i>T. brucei</i> | 108 | 1   | 108 |
| Tbg972.11.560  | <i>T. brucei</i> | 46  | 155 | 200 |
| Tbg972.11.5600 | <i>T. brucei</i> | 54  | 1   | 54  |
| Tbg972.11.5600 | <i>T. brucei</i> | 83  | 111 | 193 |
| Tbg972.11.5610 | <i>T. brucei</i> | 42  | 1   | 42  |
| Tbg972.11.5610 | <i>T. brucei</i> | 45  | 181 | 225 |
| Tbg972.11.5620 | <i>T. brucei</i> | 50  | 348 | 397 |
| Tbg972.11.5620 | <i>T. brucei</i> | 110 | 492 | 601 |
| Tbg972.11.5630 | <i>T. brucei</i> | 55  | 167 | 221 |
| Tbg972.11.5630 | <i>T. brucei</i> | 68  | 623 | 690 |
| Tbg972.11.5630 | <i>T. brucei</i> | 68  | 623 | 690 |
| Tbg972.11.5640 | <i>T. brucei</i> | 45  | 73  | 117 |
| Tbg972.11.5640 | <i>T. brucei</i> | 50  | 170 | 219 |
| Tbg972.11.5640 | <i>T. brucei</i> | 50  | 170 | 219 |
| Tbg972.11.5650 | <i>T. brucei</i> | 106 | 35  | 140 |
| Tbg972.11.5670 | <i>T. brucei</i> | 59  | 1   | 59  |
| Tbg972.11.5670 | <i>T. brucei</i> | 93  | 661 | 753 |
| Tbg972.11.5680 | <i>T. brucei</i> | 200 | 1   | 200 |
| Tbg972.11.570  | <i>T. brucei</i> | 47  | 60  | 106 |
| Tbg972.11.5720 | <i>T. brucei</i> | 42  | 30  | 71  |
| Tbg972.11.5720 | <i>T. brucei</i> | 60  | 164 | 223 |
| Tbg972.11.5720 | <i>T. brucei</i> | 40  | 320 | 359 |
| Tbg972.11.5720 | <i>T. brucei</i> | 117 | 361 | 477 |

|                |                  |     |      |      |
|----------------|------------------|-----|------|------|
| Tbg972.11.5720 | <i>T. brucei</i> | 102 | 650  | 751  |
| Tbg972.11.5720 | <i>T. brucei</i> | 76  | 911  | 986  |
| Tbg972.11.5720 | <i>T. brucei</i> | 44  | 998  | 1041 |
| Tbg972.11.5730 | <i>T. brucei</i> | 63  | 290  | 352  |
| Tbg972.11.5770 | <i>T. brucei</i> | 170 | 311  | 480  |
| Tbg972.11.5770 | <i>T. brucei</i> | 439 | 528  | 966  |
| Tbg972.11.5790 | <i>T. brucei</i> | 49  | 223  | 271  |
| Tbg972.11.5820 | <i>T. brucei</i> | 74  | 1    | 74   |
| Tbg972.11.5820 | <i>T. brucei</i> | 54  | 143  | 196  |
| Tbg972.11.5820 | <i>T. brucei</i> | 41  | 397  | 437  |
| Tbg972.11.5850 | <i>T. brucei</i> | 48  | 32   | 79   |
| Tbg972.11.5860 | <i>T. brucei</i> | 50  | 341  | 390  |
| Tbg972.11.5860 | <i>T. brucei</i> | 82  | 900  | 981  |
| Tbg972.11.5860 | <i>T. brucei</i> | 40  | 1459 | 1498 |
| Tbg972.11.5870 | <i>T. brucei</i> | 71  | 1    | 71   |
| Tbg972.11.5870 | <i>T. brucei</i> | 102 | 96   | 197  |
| Tbg972.11.5880 | <i>T. brucei</i> | 119 | 1    | 119  |
| Tbg972.11.5880 | <i>T. brucei</i> | 80  | 452  | 531  |
| Tbg972.11.5880 | <i>T. brucei</i> | 80  | 452  | 531  |
| Tbg972.11.5890 | <i>T. brucei</i> | 55  | 585  | 639  |
| Tbg972.11.590  | <i>T. brucei</i> | 41  | 316  | 356  |
| Tbg972.11.5930 | <i>T. brucei</i> | 42  | 718  | 759  |
| Tbg972.11.5930 | <i>T. brucei</i> | 44  | 1031 | 1074 |
| Tbg972.11.5930 | <i>T. brucei</i> | 44  | 1031 | 1074 |
| Tbg972.11.5940 | <i>T. brucei</i> | 326 | 642  | 967  |
| Tbg972.11.5950 | <i>T. brucei</i> | 51  | 42   | 92   |
| Tbg972.11.5950 | <i>T. brucei</i> | 278 | 488  | 765  |
| Tbg972.11.5980 | <i>T. brucei</i> | 170 | 316  | 485  |
| Tbg972.11.5990 | <i>T. brucei</i> | 211 | 245  | 455  |
| Tbg972.11.5990 | <i>T. brucei</i> | 80  | 509  | 588  |
| Tbg972.11.5990 | <i>T. brucei</i> | 66  | 591  | 656  |
| Tbg972.11.600  | <i>T. brucei</i> | 98  | 848  | 945  |
| Tbg972.11.6020 | <i>T. brucei</i> | 84  | 56   | 139  |
| Tbg972.11.6020 | <i>T. brucei</i> | 51  | 241  | 291  |
| Tbg972.11.6020 | <i>T. brucei</i> | 109 | 453  | 561  |
| Tbg972.11.6020 | <i>T. brucei</i> | 103 | 571  | 673  |
| Tbg972.11.6030 | <i>T. brucei</i> | 46  | 438  | 483  |
| Tbg972.11.6050 | <i>T. brucei</i> | 70  | 1    | 70   |
| Tbg972.11.6060 | <i>T. brucei</i> | 57  | 107  | 163  |
| Tbg972.11.6090 | <i>T. brucei</i> | 52  | 436  | 487  |
| Tbg972.11.610  | <i>T. brucei</i> | 57  | 224  | 280  |
| Tbg972.11.6100 | <i>T. brucei</i> | 137 | 11   | 147  |
| Tbg972.11.6100 | <i>T. brucei</i> | 208 | 153  | 360  |
| Tbg972.11.6100 | <i>T. brucei</i> | 79  | 366  | 444  |
| Tbg972.11.6100 | <i>T. brucei</i> | 64  | 501  | 564  |
| Tbg972.11.6100 | <i>T. brucei</i> | 59  | 592  | 650  |
| Tbg972.11.6110 | <i>T. brucei</i> | 98  | 177  | 274  |

|                |                  |     |      |      |
|----------------|------------------|-----|------|------|
| Tbg972.11.6110 | <i>T. brucei</i> | 49  | 282  | 330  |
| Tbg972.11.6110 | <i>T. brucei</i> | 49  | 282  | 330  |
| Tbg972.11.6120 | <i>T. brucei</i> | 147 | 1    | 147  |
| Tbg972.11.6120 | <i>T. brucei</i> | 89  | 197  | 285  |
| Tbg972.11.6120 | <i>T. brucei</i> | 78  | 851  | 928  |
| Tbg972.11.6120 | <i>T. brucei</i> | 73  | 965  | 1037 |
| Tbg972.11.6150 | <i>T. brucei</i> | 41  | 531  | 571  |
| Tbg972.11.6170 | <i>T. brucei</i> | 220 | 1    | 220  |
| Tbg972.11.6180 | <i>T. brucei</i> | 95  | 1    | 95   |
| Tbg972.11.6180 | <i>T. brucei</i> | 53  | 129  | 181  |
| Tbg972.11.6180 | <i>T. brucei</i> | 40  | 231  | 270  |
| Tbg972.11.6190 | <i>T. brucei</i> | 80  | 257  | 336  |
| Tbg972.11.6200 | <i>T. brucei</i> | 53  | 629  | 681  |
| Tbg972.11.6210 | <i>T. brucei</i> | 119 | 694  | 812  |
| Tbg972.11.6220 | <i>T. brucei</i> | 40  | 1    | 40   |
| Tbg972.11.6220 | <i>T. brucei</i> | 72  | 143  | 214  |
| Tbg972.11.6220 | <i>T. brucei</i> | 72  | 143  | 214  |
| Tbg972.11.6260 | <i>T. brucei</i> | 94  | 27   | 120  |
| Tbg972.11.6260 | <i>T. brucei</i> | 58  | 268  | 325  |
| Tbg972.11.6260 | <i>T. brucei</i> | 58  | 268  | 325  |
| Tbg972.11.6270 | <i>T. brucei</i> | 238 | 1    | 238  |
| Tbg972.11.6270 | <i>T. brucei</i> | 45  | 269  | 313  |
| Tbg972.11.6290 | <i>T. brucei</i> | 48  | 1    | 48   |
| Tbg972.11.6300 | <i>T. brucei</i> | 41  | 96   | 136  |
| Tbg972.11.6320 | <i>T. brucei</i> | 44  | 1    | 44   |
| Tbg972.11.6330 | <i>T. brucei</i> | 79  | 1    | 79   |
| Tbg972.11.6330 | <i>T. brucei</i> | 252 | 129  | 380  |
| Tbg972.11.6350 | <i>T. brucei</i> | 358 | 1    | 358  |
| Tbg972.11.6350 | <i>T. brucei</i> | 580 | 378  | 957  |
| Tbg972.11.6370 | <i>T. brucei</i> | 92  | 496  | 587  |
| Tbg972.11.6380 | <i>T. brucei</i> | 64  | 61   | 124  |
| Tbg972.11.6380 | <i>T. brucei</i> | 67  | 144  | 210  |
| Tbg972.11.6390 | <i>T. brucei</i> | 65  | 86   | 150  |
| Tbg972.11.6390 | <i>T. brucei</i> | 117 | 255  | 371  |
| Tbg972.11.640  | <i>T. brucei</i> | 106 | 246  | 351  |
| Tbg972.11.6400 | <i>T. brucei</i> | 40  | 1    | 40   |
| Tbg972.11.6410 | <i>T. brucei</i> | 49  | 1    | 49   |
| Tbg972.11.6410 | <i>T. brucei</i> | 54  | 69   | 122  |
| Tbg972.11.6410 | <i>T. brucei</i> | 53  | 582  | 634  |
| Tbg972.11.6410 | <i>T. brucei</i> | 79  | 961  | 1039 |
| Tbg972.11.6420 | <i>T. brucei</i> | 100 | 421  | 520  |
| Tbg972.11.6420 | <i>T. brucei</i> | 53  | 1055 | 1107 |
| Tbg972.11.6420 | <i>T. brucei</i> | 52  | 1424 | 1475 |
| Tbg972.11.6430 | <i>T. brucei</i> | 44  | 298  | 341  |
| Tbg972.11.6440 | <i>T. brucei</i> | 67  | 247  | 313  |
| Tbg972.11.6460 | <i>T. brucei</i> | 62  | 43   | 104  |
| Tbg972.11.6470 | <i>T. brucei</i> | 123 | 1    | 123  |



|                |                  |     |      |      |
|----------------|------------------|-----|------|------|
| Tbg972.11.6470 | <i>T. brucei</i> | 164 | 168  | 331  |
| Tbg972.11.6470 | <i>T. brucei</i> | 63  | 984  | 1046 |
| Tbg972.11.6480 | <i>T. brucei</i> | 220 | 355  | 574  |
| Tbg972.11.6480 | <i>T. brucei</i> | 43  | 612  | 654  |
| Tbg972.11.6490 | <i>T. brucei</i> | 196 | 1    | 196  |
| Tbg972.11.6490 | <i>T. brucei</i> | 87  | 200  | 286  |
| Tbg972.11.6490 | <i>T. brucei</i> | 364 | 296  | 659  |
| Tbg972.11.6490 | <i>T. brucei</i> | 178 | 719  | 896  |
| Tbg972.11.650  | <i>T. brucei</i> | 373 | 141  | 513  |
| Tbg972.11.6500 | <i>T. brucei</i> | 67  | 15   | 81   |
| Tbg972.11.6510 | <i>T. brucei</i> | 41  | 568  | 608  |
| Tbg972.11.6510 | <i>T. brucei</i> | 99  | 1092 | 1190 |
| Tbg972.11.6510 | <i>T. brucei</i> | 40  | 1764 | 1803 |
| Tbg972.11.6510 | <i>T. brucei</i> | 42  | 1932 | 1973 |
| Tbg972.11.6520 | <i>T. brucei</i> | 112 | 65   | 176  |
| Tbg972.11.6520 | <i>T. brucei</i> | 41  | 810  | 850  |
| Tbg972.11.6530 | <i>T. brucei</i> | 125 | 72   | 196  |
| Tbg972.11.6550 | <i>T. brucei</i> | 50  | 622  | 671  |
| Tbg972.11.6560 | <i>T. brucei</i> | 206 | 1    | 206  |
| Tbg972.11.6570 | <i>T. brucei</i> | 48  | 45   | 92   |
| Tbg972.11.6580 | <i>T. brucei</i> | 200 | 1    | 200  |
| Tbg972.11.6610 | <i>T. brucei</i> | 74  | 10   | 83   |
| Tbg972.11.6610 | <i>T. brucei</i> | 46  | 132  | 177  |
| Tbg972.11.6610 | <i>T. brucei</i> | 51  | 320  | 370  |
| Tbg972.11.6610 | <i>T. brucei</i> | 43  | 393  | 435  |
| Tbg972.11.6630 | <i>T. brucei</i> | 60  | 371  | 430  |
| Tbg972.11.6640 | <i>T. brucei</i> | 55  | 38   | 92   |
| Tbg972.11.6660 | <i>T. brucei</i> | 50  | 78   | 127  |
| Tbg972.11.6660 | <i>T. brucei</i> | 175 | 147  | 321  |
| Tbg972.11.6670 | <i>T. brucei</i> | 50  | 1005 | 1054 |
| Tbg972.11.6680 | <i>T. brucei</i> | 51  | 559  | 609  |
| Tbg972.11.6700 | <i>T. brucei</i> | 46  | 62   | 107  |
| Tbg972.11.6710 | <i>T. brucei</i> | 46  | 98   | 143  |
| Tbg972.11.6720 | <i>T. brucei</i> | 87  | 380  | 466  |
| Tbg972.11.6730 | <i>T. brucei</i> | 100 | 285  | 384  |
| Tbg972.11.6740 | <i>T. brucei</i> | 52  | 1    | 52   |
| Tbg972.11.6750 | <i>T. brucei</i> | 41  | 52   | 92   |
| Tbg972.11.6750 | <i>T. brucei</i> | 50  | 183  | 232  |
| Tbg972.11.6750 | <i>T. brucei</i> | 50  | 183  | 232  |
| Tbg972.11.6770 | <i>T. brucei</i> | 158 | 1    | 158  |
| Tbg972.11.680  | <i>T. brucei</i> | 81  | 140  | 220  |
| Tbg972.11.680  | <i>T. brucei</i> | 42  | 285  | 326  |
| Tbg972.11.6800 | <i>T. brucei</i> | 113 | 299  | 411  |
| Tbg972.11.6810 | <i>T. brucei</i> | 60  | 114  | 173  |
| Tbg972.11.6810 | <i>T. brucei</i> | 47  | 209  | 255  |
| Tbg972.11.6810 | <i>T. brucei</i> | 51  | 359  | 409  |
| Tbg972.11.6810 | <i>T. brucei</i> | 44  | 506  | 549  |

|                |                  |     |      |      |
|----------------|------------------|-----|------|------|
| Tbg972.11.6810 | <i>T. brucei</i> | 93  | 647  | 739  |
| Tbg972.11.6810 | <i>T. brucei</i> | 45  | 871  | 915  |
| Tbg972.11.6810 | <i>T. brucei</i> | 47  | 1414 | 1460 |
| Tbg972.11.6810 | <i>T. brucei</i> | 42  | 1492 | 1533 |
| Tbg972.11.6810 | <i>T. brucei</i> | 55  | 1640 | 1694 |
| Tbg972.11.6840 | <i>T. brucei</i> | 83  | 36   | 118  |
| Tbg972.11.6860 | <i>T. brucei</i> | 58  | 242  | 299  |
| Tbg972.11.6880 | <i>T. brucei</i> | 54  | 1    | 54   |
| Tbg972.11.690  | <i>T. brucei</i> | 137 | 1    | 137  |
| Tbg972.11.6930 | <i>T. brucei</i> | 59  | 360  | 418  |
| Tbg972.11.6940 | <i>T. brucei</i> | 255 | 1    | 255  |
| Tbg972.11.6960 | <i>T. brucei</i> | 69  | 343  | 411  |
| Tbg972.11.6960 | <i>T. brucei</i> | 204 | 698  | 901  |
| Tbg972.11.6960 | <i>T. brucei</i> | 247 | 930  | 1176 |
| Tbg972.11.6970 | <i>T. brucei</i> | 84  | 63   | 146  |
| Tbg972.11.6990 | <i>T. brucei</i> | 84  | 63   | 146  |
| Tbg972.11.7010 | <i>T. brucei</i> | 291 | 1    | 291  |
| Tbg972.11.7040 | <i>T. brucei</i> | 65  | 1    | 65   |
| Tbg972.11.7040 | <i>T. brucei</i> | 83  | 183  | 265  |
| Tbg972.11.7040 | <i>T. brucei</i> | 205 | 294  | 498  |
| Tbg972.11.7060 | <i>T. brucei</i> | 135 | 53   | 187  |
| Tbg972.11.7070 | <i>T. brucei</i> | 67  | 1    | 67   |
| Tbg972.11.7070 | <i>T. brucei</i> | 40  | 100  | 139  |
| Tbg972.11.7090 | <i>T. brucei</i> | 95  | 83   | 177  |
| Tbg972.11.710  | <i>T. brucei</i> | 43  | 1    | 43   |
| Tbg972.11.710  | <i>T. brucei</i> | 59  | 84   | 142  |
| Tbg972.11.710  | <i>T. brucei</i> | 48  | 183  | 230  |
| Tbg972.11.7120 | <i>T. brucei</i> | 88  | 197  | 284  |
| Tbg972.11.7140 | <i>T. brucei</i> | 307 | 166  | 472  |
| Tbg972.11.7160 | <i>T. brucei</i> | 48  | 81   | 128  |
| Tbg972.11.7160 | <i>T. brucei</i> | 50  | 212  | 261  |
| Tbg972.11.7160 | <i>T. brucei</i> | 125 | 339  | 463  |
| Tbg972.11.7170 | <i>T. brucei</i> | 282 | 1    | 282  |
| Tbg972.11.7170 | <i>T. brucei</i> | 165 | 1019 | 1183 |
| Tbg972.11.7170 | <i>T. brucei</i> | 40  | 1214 | 1253 |
| Tbg972.11.7180 | <i>T. brucei</i> | 102 | 90   | 191  |
| Tbg972.11.7190 | <i>T. brucei</i> | 45  | 166  | 210  |
| Tbg972.11.7200 | <i>T. brucei</i> | 92  | 1    | 92   |
| Tbg972.11.7200 | <i>T. brucei</i> | 41  | 157  | 197  |
| Tbg972.11.7200 | <i>T. brucei</i> | 41  | 157  | 197  |
| Tbg972.11.7220 | <i>T. brucei</i> | 200 | 424  | 623  |
| Tbg972.11.7220 | <i>T. brucei</i> | 252 | 711  | 962  |
| Tbg972.11.7230 | <i>T. brucei</i> | 56  | 1    | 56   |
| Tbg972.11.7230 | <i>T. brucei</i> | 68  | 124  | 191  |
| Tbg972.11.7230 | <i>T. brucei</i> | 52  | 519  | 570  |
| Tbg972.11.7230 | <i>T. brucei</i> | 66  | 1055 | 1120 |
| Tbg972.11.7230 | <i>T. brucei</i> | 312 | 1149 | 1460 |

|                |                  |     |      |      |
|----------------|------------------|-----|------|------|
| Tbg972.11.7240 | <i>T. brucei</i> | 46  | 1    | 46   |
| Tbg972.11.7250 | <i>T. brucei</i> | 183 | 1    | 183  |
| Tbg972.11.7250 | <i>T. brucei</i> | 42  | 300  | 341  |
| Tbg972.11.7250 | <i>T. brucei</i> | 69  | 394  | 462  |
| Tbg972.11.7250 | <i>T. brucei</i> | 49  | 638  | 686  |
| Tbg972.11.7250 | <i>T. brucei</i> | 189 | 742  | 930  |
| Tbg972.11.7250 | <i>T. brucei</i> | 68  | 973  | 1040 |
| Tbg972.11.7250 | <i>T. brucei</i> | 199 | 1063 | 1261 |
| Tbg972.11.7260 | <i>T. brucei</i> | 152 | 1    | 152  |
| Tbg972.11.7260 | <i>T. brucei</i> | 167 | 196  | 362  |
| Tbg972.11.7260 | <i>T. brucei</i> | 77  | 365  | 441  |
| Tbg972.11.7280 | <i>T. brucei</i> | 43  | 92   | 134  |
| Tbg972.11.7280 | <i>T. brucei</i> | 71  | 823  | 893  |
| Tbg972.11.7280 | <i>T. brucei</i> | 71  | 823  | 893  |
| Tbg972.11.7310 | <i>T. brucei</i> | 63  | 27   | 89   |
| Tbg972.11.7310 | <i>T. brucei</i> | 154 | 246  | 399  |
| Tbg972.11.7330 | <i>T. brucei</i> | 121 | 76   | 196  |
| Tbg972.11.7340 | <i>T. brucei</i> | 119 | 76   | 194  |
| Tbg972.11.7350 | <i>T. brucei</i> | 91  | 91   | 181  |
| Tbg972.11.7360 | <i>T. brucei</i> | 53  | 161  | 213  |
| Tbg972.11.7360 | <i>T. brucei</i> | 56  | 322  | 377  |
| Tbg972.11.7370 | <i>T. brucei</i> | 78  | 99   | 176  |
| Tbg972.11.7370 | <i>T. brucei</i> | 53  | 421  | 473  |
| Tbg972.11.7380 | <i>T. brucei</i> | 61  | 336  | 396  |
| Tbg972.11.7380 | <i>T. brucei</i> | 98  | 433  | 530  |
| Tbg972.11.7380 | <i>T. brucei</i> | 98  | 433  | 530  |
| Tbg972.11.7390 | <i>T. brucei</i> | 209 | 58   | 266  |
| Tbg972.11.7390 | <i>T. brucei</i> | 135 | 270  | 404  |
| Tbg972.11.7400 | <i>T. brucei</i> | 41  | 506  | 546  |
| Tbg972.11.7410 | <i>T. brucei</i> | 59  | 88   | 146  |
| Tbg972.11.7410 | <i>T. brucei</i> | 76  | 449  | 524  |
| Tbg972.11.7410 | <i>T. brucei</i> | 76  | 449  | 524  |
| Tbg972.11.7460 | <i>T. brucei</i> | 77  | 46   | 122  |
| Tbg972.11.7460 | <i>T. brucei</i> | 41  | 131  | 171  |
| Tbg972.11.7470 | <i>T. brucei</i> | 168 | 27   | 194  |
| Tbg972.11.7470 | <i>T. brucei</i> | 101 | 228  | 328  |
| Tbg972.11.7470 | <i>T. brucei</i> | 70  | 461  | 530  |
| Tbg972.11.7490 | <i>T. brucei</i> | 68  | 54   | 121  |
| Tbg972.11.7490 | <i>T. brucei</i> | 200 | 223  | 422  |
| Tbg972.11.750  | <i>T. brucei</i> | 63  | 282  | 344  |
| Tbg972.11.750  | <i>T. brucei</i> | 56  | 356  | 411  |
| Tbg972.11.750  | <i>T. brucei</i> | 65  | 752  | 816  |
| Tbg972.11.7500 | <i>T. brucei</i> | 81  | 26   | 106  |
| Tbg972.11.7560 | <i>T. brucei</i> | 41  | 23   | 63   |
| Tbg972.11.7570 | <i>T. brucei</i> | 70  | 89   | 158  |
| Tbg972.11.7570 | <i>T. brucei</i> | 180 | 756  | 935  |
| Tbg972.11.760  | <i>T. brucei</i> | 78  | 331  | 408  |

|                |                  |     |     |      |
|----------------|------------------|-----|-----|------|
| Tbg972.11.7600 | <i>T. brucei</i> | 87  | 1   | 87   |
| Tbg972.11.7620 | <i>T. brucei</i> | 60  | 1   | 60   |
| Tbg972.11.7670 | <i>T. brucei</i> | 61  | 1   | 61   |
| Tbg972.11.7670 | <i>T. brucei</i> | 67  | 75  | 141  |
| Tbg972.11.7670 | <i>T. brucei</i> | 67  | 75  | 141  |
| Tbg972.11.7680 | <i>T. brucei</i> | 52  | 1   | 52   |
| Tbg972.11.7680 | <i>T. brucei</i> | 138 | 341 | 478  |
| Tbg972.11.7690 | <i>T. brucei</i> | 143 | 194 | 336  |
| Tbg972.11.7690 | <i>T. brucei</i> | 154 | 391 | 544  |
| Tbg972.11.7700 | <i>T. brucei</i> | 43  | 101 | 143  |
| Tbg972.11.7700 | <i>T. brucei</i> | 62  | 427 | 488  |
| Tbg972.11.7700 | <i>T. brucei</i> | 62  | 427 | 488  |
| Tbg972.11.7710 | <i>T. brucei</i> | 49  | 262 | 310  |
| Tbg972.11.7720 | <i>T. brucei</i> | 125 | 1   | 125  |
| Tbg972.11.7720 | <i>T. brucei</i> | 113 | 219 | 331  |
| Tbg972.11.7730 | <i>T. brucei</i> | 199 | 1   | 199  |
| Tbg972.11.7730 | <i>T. brucei</i> | 161 | 227 | 387  |
| Tbg972.11.7740 | <i>T. brucei</i> | 242 | 22  | 263  |
| Tbg972.11.7740 | <i>T. brucei</i> | 97  | 615 | 711  |
| Tbg972.11.7740 | <i>T. brucei</i> | 147 | 733 | 879  |
| Tbg972.11.7740 | <i>T. brucei</i> | 92  | 889 | 980  |
| Tbg972.11.7750 | <i>T. brucei</i> | 133 | 48  | 180  |
| Tbg972.11.7750 | <i>T. brucei</i> | 99  | 304 | 402  |
| Tbg972.11.7760 | <i>T. brucei</i> | 77  | 1   | 77   |
| Tbg972.11.7760 | <i>T. brucei</i> | 69  | 349 | 417  |
| Tbg972.11.7760 | <i>T. brucei</i> | 45  | 456 | 500  |
| Tbg972.11.7760 | <i>T. brucei</i> | 57  | 689 | 745  |
| Tbg972.11.7770 | <i>T. brucei</i> | 382 | 1   | 382  |
| Tbg972.11.7770 | <i>T. brucei</i> | 105 | 403 | 507  |
| Tbg972.11.7780 | <i>T. brucei</i> | 70  | 58  | 127  |
| Tbg972.11.7810 | <i>T. brucei</i> | 105 | 46  | 150  |
| Tbg972.11.7810 | <i>T. brucei</i> | 55  | 462 | 516  |
| Tbg972.11.7810 | <i>T. brucei</i> | 75  | 855 | 929  |
| Tbg972.11.7820 | <i>T. brucei</i> | 50  | 50  | 99   |
| Tbg972.11.7820 | <i>T. brucei</i> | 105 | 134 | 238  |
| Tbg972.11.7820 | <i>T. brucei</i> | 52  | 997 | 1048 |
| Tbg972.11.7830 | <i>T. brucei</i> | 80  | 66  | 145  |
| Tbg972.11.7830 | <i>T. brucei</i> | 96  | 332 | 427  |
| Tbg972.11.7830 | <i>T. brucei</i> | 59  | 500 | 558  |
| Tbg972.11.7840 | <i>T. brucei</i> | 91  | 37  | 127  |
| Tbg972.11.7840 | <i>T. brucei</i> | 55  | 187 | 241  |
| Tbg972.11.7840 | <i>T. brucei</i> | 69  | 443 | 511  |
| Tbg972.11.7840 | <i>T. brucei</i> | 72  | 579 | 650  |
| Tbg972.11.7840 | <i>T. brucei</i> | 99  | 652 | 750  |
| Tbg972.11.7840 | <i>T. brucei</i> | 51  | 984 | 1034 |
| Tbg972.11.7860 | <i>T. brucei</i> | 101 | 144 | 244  |
| Tbg972.11.7860 | <i>T. brucei</i> | 97  | 248 | 344  |

|                |                  |     |      |      |
|----------------|------------------|-----|------|------|
| Tbg972.11.7880 | <i>T. brucei</i> | 130 | 32   | 161  |
| Tbg972.11.7880 | <i>T. brucei</i> | 51  | 194  | 244  |
| Tbg972.11.7880 | <i>T. brucei</i> | 51  | 194  | 244  |
| Tbg972.11.7890 | <i>T. brucei</i> | 40  | 1    | 40   |
| Tbg972.11.790  | <i>T. brucei</i> | 88  | 130  | 217  |
| Tbg972.11.7900 | <i>T. brucei</i> | 41  | 456  | 496  |
| Tbg972.11.7920 | <i>T. brucei</i> | 65  | 28   | 92   |
| Tbg972.11.7920 | <i>T. brucei</i> | 45  | 127  | 171  |
| Tbg972.11.7920 | <i>T. brucei</i> | 69  | 482  | 550  |
| Tbg972.11.7930 | <i>T. brucei</i> | 41  | 14   | 54   |
| Tbg972.11.7940 | <i>T. brucei</i> | 91  | 1    | 91   |
| Tbg972.11.7940 | <i>T. brucei</i> | 66  | 95   | 160  |
| Tbg972.11.7940 | <i>T. brucei</i> | 160 | 532  | 691  |
| Tbg972.11.7960 | <i>T. brucei</i> | 45  | 11   | 55   |
| Tbg972.11.80   | <i>T. brucei</i> | 41  | 49   | 89   |
| Tbg972.11.80   | <i>T. brucei</i> | 51  | 336  | 386  |
| Tbg972.11.80   | <i>T. brucei</i> | 51  | 336  | 386  |
| Tbg972.11.8000 | <i>T. brucei</i> | 52  | 1    | 52   |
| Tbg972.11.8010 | <i>T. brucei</i> | 56  | 32   | 87   |
| Tbg972.11.8020 | <i>T. brucei</i> | 51  | 1    | 51   |
| Tbg972.11.8050 | <i>T. brucei</i> | 219 | 91   | 309  |
| Tbg972.11.8050 | <i>T. brucei</i> | 154 | 370  | 523  |
| Tbg972.11.8060 | <i>T. brucei</i> | 84  | 133  | 216  |
| Tbg972.11.8070 | <i>T. brucei</i> | 146 | 1    | 146  |
| Tbg972.11.8070 | <i>T. brucei</i> | 232 | 158  | 389  |
| Tbg972.11.8070 | <i>T. brucei</i> | 71  | 404  | 474  |
| Tbg972.11.8070 | <i>T. brucei</i> | 200 | 498  | 697  |
| Tbg972.11.8080 | <i>T. brucei</i> | 51  | 48   | 98   |
| Tbg972.11.8100 | <i>T. brucei</i> | 100 | 299  | 398  |
| Tbg972.11.8110 | <i>T. brucei</i> | 71  | 61   | 131  |
| Tbg972.11.8130 | <i>T. brucei</i> | 71  | 24   | 94   |
| Tbg972.11.8130 | <i>T. brucei</i> | 53  | 167  | 219  |
| Tbg972.11.8130 | <i>T. brucei</i> | 53  | 167  | 219  |
| Tbg972.11.8140 | <i>T. brucei</i> | 229 | 59   | 287  |
| Tbg972.11.8140 | <i>T. brucei</i> | 144 | 396  | 539  |
| Tbg972.11.8150 | <i>T. brucei</i> | 92  | 354  | 445  |
| Tbg972.11.8170 | <i>T. brucei</i> | 70  | 234  | 303  |
| Tbg972.11.820  | <i>T. brucei</i> | 40  | 27   | 66   |
| Tbg972.11.820  | <i>T. brucei</i> | 43  | 116  | 158  |
| Tbg972.11.820  | <i>T. brucei</i> | 72  | 194  | 265  |
| Tbg972.11.8200 | <i>T. brucei</i> | 46  | 480  | 525  |
| Tbg972.11.8230 | <i>T. brucei</i> | 79  | 95   | 173  |
| Tbg972.11.8230 | <i>T. brucei</i> | 99  | 221  | 319  |
| Tbg972.11.8240 | <i>T. brucei</i> | 47  | 2239 | 2285 |
| Tbg972.11.8260 | <i>T. brucei</i> | 64  | 1    | 64   |
| Tbg972.11.8260 | <i>T. brucei</i> | 179 | 121  | 299  |
| Tbg972.11.8260 | <i>T. brucei</i> | 46  | 359  | 404  |

|                |                  |     |      |      |
|----------------|------------------|-----|------|------|
| Tbg972.11.8270 | <i>T. brucei</i> | 46  | 24   | 69   |
| Tbg972.11.8280 | <i>T. brucei</i> | 56  | 16   | 71   |
| Tbg972.11.830  | <i>T. brucei</i> | 61  | 91   | 151  |
| Tbg972.11.8330 | <i>T. brucei</i> | 46  | 1336 | 1381 |
| Tbg972.11.8350 | <i>T. brucei</i> | 142 | 35   | 176  |
| Tbg972.11.8360 | <i>T. brucei</i> | 61  | 1    | 61   |
| Tbg972.11.8380 | <i>T. brucei</i> | 40  | 69   | 108  |
| Tbg972.11.8380 | <i>T. brucei</i> | 47  | 513  | 559  |
| Tbg972.11.8380 | <i>T. brucei</i> | 47  | 513  | 559  |
| Tbg972.11.840  | <i>T. brucei</i> | 45  | 80   | 124  |
| Tbg972.11.8400 | <i>T. brucei</i> | 71  | 1    | 71   |
| Tbg972.11.8430 | <i>T. brucei</i> | 68  | 1    | 68   |
| Tbg972.11.8450 | <i>T. brucei</i> | 65  | 231  | 295  |
| Tbg972.11.8470 | <i>T. brucei</i> | 44  | 1    | 44   |
| Tbg972.11.8480 | <i>T. brucei</i> | 97  | 504  | 600  |
| Tbg972.11.850  | <i>T. brucei</i> | 61  | 45   | 105  |
| Tbg972.11.850  | <i>T. brucei</i> | 40  | 215  | 254  |
| Tbg972.11.850  | <i>T. brucei</i> | 109 | 640  | 748  |
| Tbg972.11.8500 | <i>T. brucei</i> | 42  | 73   | 114  |
| Tbg972.11.8520 | <i>T. brucei</i> | 76  | 69   | 144  |
| Tbg972.11.8530 | <i>T. brucei</i> | 90  | 1    | 90   |
| Tbg972.11.8530 | <i>T. brucei</i> | 102 | 318  | 419  |
| Tbg972.11.8530 | <i>T. brucei</i> | 55  | 481  | 535  |
| Tbg972.11.8570 | <i>T. brucei</i> | 42  | 181  | 222  |
| Tbg972.11.8600 | <i>T. brucei</i> | 42  | 79   | 120  |
| Tbg972.11.8610 | <i>T. brucei</i> | 41  | 209  | 249  |
| Tbg972.11.8630 | <i>T. brucei</i> | 239 | 172  | 410  |
| Tbg972.11.8640 | <i>T. brucei</i> | 56  | 49   | 104  |
| Tbg972.11.8640 | <i>T. brucei</i> | 134 | 120  | 253  |
| Tbg972.11.8640 | <i>T. brucei</i> | 179 | 261  | 439  |
| Tbg972.11.8650 | <i>T. brucei</i> | 47  | 210  | 256  |
| Tbg972.11.8650 | <i>T. brucei</i> | 88  | 452  | 539  |
| Tbg972.11.8660 | <i>T. brucei</i> | 157 | 36   | 192  |
| Tbg972.11.8690 | <i>T. brucei</i> | 47  | 270  | 316  |
| Tbg972.11.8690 | <i>T. brucei</i> | 88  | 512  | 599  |
| Tbg972.11.870  | <i>T. brucei</i> | 71  | 61   | 131  |
| Tbg972.11.870  | <i>T. brucei</i> | 412 | 245  | 656  |
| Tbg972.11.870  | <i>T. brucei</i> | 105 | 731  | 835  |
| Tbg972.11.8700 | <i>T. brucei</i> | 41  | 35   | 75   |
| Tbg972.11.8720 | <i>T. brucei</i> | 85  | 212  | 296  |
| Tbg972.11.8770 | <i>T. brucei</i> | 44  | 60   | 103  |
| Tbg972.11.880  | <i>T. brucei</i> | 188 | 38   | 225  |
| Tbg972.11.8800 | <i>T. brucei</i> | 42  | 36   | 77   |
| Tbg972.11.8800 | <i>T. brucei</i> | 42  | 263  | 304  |
| Tbg972.11.8800 | <i>T. brucei</i> | 122 | 477  | 598  |
| Tbg972.11.8810 | <i>T. brucei</i> | 80  | 33   | 112  |
| Tbg972.11.8810 | <i>T. brucei</i> | 320 | 655  | 974  |

|                |                  |     |     |     |
|----------------|------------------|-----|-----|-----|
| Tbg972.11.8820 | <i>T. brucei</i> | 91  | 8   | 98  |
| Tbg972.11.8820 | <i>T. brucei</i> | 158 | 104 | 261 |
| Tbg972.11.8840 | <i>T. brucei</i> | 105 | 321 | 425 |
| Tbg972.11.8850 | <i>T. brucei</i> | 96  | 69  | 164 |
| Tbg972.11.8850 | <i>T. brucei</i> | 41  | 256 | 296 |
| Tbg972.11.8850 | <i>T. brucei</i> | 41  | 256 | 296 |
| Tbg972.11.8860 | <i>T. brucei</i> | 61  | 359 | 419 |
| Tbg972.11.8870 | <i>T. brucei</i> | 41  | 148 | 188 |
| Tbg972.11.8890 | <i>T. brucei</i> | 54  | 52  | 105 |
| Tbg972.11.8920 | <i>T. brucei</i> | 76  | 1   | 76  |
| Tbg972.11.8920 | <i>T. brucei</i> | 59  | 212 | 270 |
| Tbg972.11.8920 | <i>T. brucei</i> | 48  | 414 | 461 |
| Tbg972.11.8930 | <i>T. brucei</i> | 85  | 1   | 85  |
| Tbg972.11.8930 | <i>T. brucei</i> | 47  | 128 | 174 |
| Tbg972.11.8930 | <i>T. brucei</i> | 95  | 176 | 270 |
| Tbg972.11.8940 | <i>T. brucei</i> | 68  | 771 | 838 |
| Tbg972.11.8950 | <i>T. brucei</i> | 41  | 1   | 41  |
| Tbg972.11.8960 | <i>T. brucei</i> | 162 | 1   | 162 |
| Tbg972.11.8960 | <i>T. brucei</i> | 72  | 687 | 758 |
| Tbg972.11.8990 | <i>T. brucei</i> | 42  | 79  | 120 |
| Tbg972.11.90   | <i>T. brucei</i> | 80  | 134 | 213 |
| Tbg972.11.900  | <i>T. brucei</i> | 72  | 1   | 72  |
| Tbg972.11.900  | <i>T. brucei</i> | 281 | 288 | 568 |
| Tbg972.11.900  | <i>T. brucei</i> | 270 | 679 | 948 |
| Tbg972.11.9010 | <i>T. brucei</i> | 78  | 64  | 141 |
| Tbg972.11.9030 | <i>T. brucei</i> | 84  | 156 | 239 |
| Tbg972.11.9030 | <i>T. brucei</i> | 125 | 247 | 371 |
| Tbg972.11.9070 | <i>T. brucei</i> | 69  | 439 | 507 |
| Tbg972.11.9080 | <i>T. brucei</i> | 79  | 19  | 97  |
| Tbg972.11.9110 | <i>T. brucei</i> | 54  | 1   | 54  |
| Tbg972.11.9120 | <i>T. brucei</i> | 43  | 36  | 78  |
| Tbg972.11.9130 | <i>T. brucei</i> | 159 | 1   | 159 |
| Tbg972.11.9160 | <i>T. brucei</i> | 55  | 392 | 446 |
| Tbg972.11.9160 | <i>T. brucei</i> | 54  | 709 | 762 |
| Tbg972.11.9160 | <i>T. brucei</i> | 54  | 709 | 762 |
| Tbg972.11.9170 | <i>T. brucei</i> | 45  | 25  | 69  |
| Tbg972.11.9180 | <i>T. brucei</i> | 93  | 97  | 189 |
| Tbg972.11.9190 | <i>T. brucei</i> | 51  | 91  | 141 |
| Tbg972.11.9200 | <i>T. brucei</i> | 117 | 1   | 117 |
| Tbg972.11.9200 | <i>T. brucei</i> | 255 | 269 | 523 |
| Tbg972.11.9220 | <i>T. brucei</i> | 85  | 118 | 202 |
| Tbg972.11.9230 | <i>T. brucei</i> | 41  | 1   | 41  |
| Tbg972.11.9240 | <i>T. brucei</i> | 104 | 1   | 104 |
| Tbg972.11.9260 | <i>T. brucei</i> | 52  | 1   | 52  |
| Tbg972.11.9260 | <i>T. brucei</i> | 68  | 141 | 208 |
| Tbg972.11.930  | <i>T. brucei</i> | 69  | 20  | 88  |
| Tbg972.11.9310 | <i>T. brucei</i> | 78  | 331 | 408 |

|                |                  |     |      |      |
|----------------|------------------|-----|------|------|
| Tbg972.11.9320 | <i>T. brucei</i> | 62  | 1    | 62   |
| Tbg972.11.9320 | <i>T. brucei</i> | 40  | 321  | 360  |
| Tbg972.11.9320 | <i>T. brucei</i> | 86  | 2723 | 2808 |
| Tbg972.11.9320 | <i>T. brucei</i> | 58  | 2946 | 3003 |
| Tbg972.11.9320 | <i>T. brucei</i> | 68  | 3248 | 3315 |
| Tbg972.11.9330 | <i>T. brucei</i> | 112 | 376  | 487  |
| Tbg972.11.9340 | <i>T. brucei</i> | 89  | 116  | 204  |
| Tbg972.11.9380 | <i>T. brucei</i> | 51  | 196  | 246  |
| Tbg972.11.9380 | <i>T. brucei</i> | 107 | 265  | 371  |
| Tbg972.11.9380 | <i>T. brucei</i> | 68  | 399  | 466  |
| Tbg972.11.9380 | <i>T. brucei</i> | 73  | 483  | 555  |
| Tbg972.11.9380 | <i>T. brucei</i> | 251 | 711  | 961  |
| Tbg972.11.9380 | <i>T. brucei</i> | 80  | 987  | 1066 |
| Tbg972.11.9420 | <i>T. brucei</i> | 80  | 134  | 213  |
| Tbg972.11.9430 | <i>T. brucei</i> | 43  | 56   | 98   |
| Tbg972.11.9430 | <i>T. brucei</i> | 40  | 322  | 361  |
| Tbg972.11.9430 | <i>T. brucei</i> | 40  | 322  | 361  |
| Tbg972.11.9450 | <i>T. brucei</i> | 98  | 1    | 98   |
| Tbg972.11.9450 | <i>T. brucei</i> | 41  | 194  | 234  |
| Tbg972.11.9460 | <i>T. brucei</i> | 67  | 141  | 207  |
| Tbg972.11.9460 | <i>T. brucei</i> | 68  | 821  | 888  |
| Tbg972.11.9490 | <i>T. brucei</i> | 44  | 182  | 225  |
| Tbg972.11.9500 | <i>T. brucei</i> | 50  | 123  | 172  |
| Tbg972.11.9530 | <i>T. brucei</i> | 178 | 75   | 252  |
| Tbg972.11.9540 | <i>T. brucei</i> | 74  | 1    | 74   |
| Tbg972.11.9540 | <i>T. brucei</i> | 123 | 283  | 405  |
| Tbg972.11.9540 | <i>T. brucei</i> | 91  | 448  | 538  |
| Tbg972.11.9540 | <i>T. brucei</i> | 60  | 568  | 627  |
| Tbg972.11.9540 | <i>T. brucei</i> | 77  | 661  | 737  |
| Tbg972.11.9540 | <i>T. brucei</i> | 98  | 795  | 892  |
| Tbg972.11.9550 | <i>T. brucei</i> | 54  | 207  | 260  |
| Tbg972.11.9560 | <i>T. brucei</i> | 100 | 104  | 203  |
| Tbg972.11.9560 | <i>T. brucei</i> | 106 | 295  | 400  |
| Tbg972.11.9570 | <i>T. brucei</i> | 47  | 14   | 60   |
| Tbg972.11.9580 | <i>T. brucei</i> | 55  | 31   | 85   |
| Tbg972.11.9580 | <i>T. brucei</i> | 64  | 412  | 475  |
| Tbg972.11.9580 | <i>T. brucei</i> | 64  | 412  | 475  |
| Tbg972.11.960  | <i>T. brucei</i> | 40  | 80   | 119  |
| Tbg972.11.9600 | <i>T. brucei</i> | 138 | 124  | 261  |
| Tbg972.11.9620 | <i>T. brucei</i> | 92  | 1    | 92   |
| Tbg972.11.9630 | <i>T. brucei</i> | 185 | 1    | 185  |
| Tbg972.11.9630 | <i>T. brucei</i> | 83  | 190  | 272  |
| Tbg972.11.9640 | <i>T. brucei</i> | 69  | 1    | 69   |
| Tbg972.11.9640 | <i>T. brucei</i> | 95  | 84   | 178  |
| Tbg972.11.9640 | <i>T. brucei</i> | 95  | 84   | 178  |
| Tbg972.11.9660 | <i>T. brucei</i> | 52  | 61   | 112  |
| Tbg972.11.9660 | <i>T. brucei</i> | 63  | 509  | 571  |



|                |                  |     |     |     |
|----------------|------------------|-----|-----|-----|
| Tbg972.11.9660 | <i>T. brucei</i> | 63  | 509 | 571 |
| Tbg972.11.9670 | <i>T. brucei</i> | 60  | 511 | 570 |
| Tbg972.11.9680 | <i>T. brucei</i> | 63  | 64  | 126 |
| Tbg972.11.9680 | <i>T. brucei</i> | 62  | 509 | 570 |
| Tbg972.11.9680 | <i>T. brucei</i> | 62  | 509 | 570 |
| Tbg972.11.9690 | <i>T. brucei</i> | 62  | 510 | 571 |
| Tbg972.11.970  | <i>T. brucei</i> | 47  | 390 | 436 |
| Tbg972.11.9700 | <i>T. brucei</i> | 63  | 64  | 126 |
| Tbg972.11.9700 | <i>T. brucei</i> | 62  | 509 | 570 |
| Tbg972.11.9700 | <i>T. brucei</i> | 62  | 509 | 570 |
| Tbg972.11.9710 | <i>T. brucei</i> | 64  | 509 | 572 |
| Tbg972.11.9720 | <i>T. brucei</i> | 51  | 373 | 423 |
| Tbg972.11.9720 | <i>T. brucei</i> | 65  | 508 | 572 |
| Tbg972.11.9720 | <i>T. brucei</i> | 65  | 508 | 572 |
| Tbg972.11.9730 | <i>T. brucei</i> | 77  | 478 | 554 |
| Tbg972.11.9740 | <i>T. brucei</i> | 113 | 60  | 172 |
| Tbg972.11.9780 | <i>T. brucei</i> | 97  | 36  | 132 |
| Tbg972.11.9790 | <i>T. brucei</i> | 54  | 30  | 83  |
| Tbg972.11.9790 | <i>T. brucei</i> | 108 | 142 | 249 |
| Tbg972.11.9790 | <i>T. brucei</i> | 242 | 266 | 507 |
| Tbg972.11.9790 | <i>T. brucei</i> | 58  | 532 | 589 |
| Tbg972.11.980  | <i>T. brucei</i> | 54  | 22  | 75  |
| Tbg972.11.980  | <i>T. brucei</i> | 60  | 203 | 262 |
| Tbg972.11.980  | <i>T. brucei</i> | 122 | 292 | 413 |
| Tbg972.11.9820 | <i>T. brucei</i> | 40  | 79  | 118 |
| Tbg972.11.9830 | <i>T. brucei</i> | 47  | 1   | 47  |
| Tbg972.11.9830 | <i>T. brucei</i> | 71  | 95  | 165 |
| Tbg972.11.9830 | <i>T. brucei</i> | 71  | 95  | 165 |
| Tbg972.11.9850 | <i>T. brucei</i> | 53  | 114 | 166 |
| Tbg972.11.9850 | <i>T. brucei</i> | 86  | 185 | 270 |
| Tbg972.11.9850 | <i>T. brucei</i> | 136 | 354 | 489 |
| Tbg972.11.9880 | <i>T. brucei</i> | 115 | 208 | 322 |
| Tbg972.11.9920 | <i>T. brucei</i> | 69  | 49  | 117 |
| Tbg972.11.9920 | <i>T. brucei</i> | 43  | 504 | 546 |
| Tbg972.11.9920 | <i>T. brucei</i> | 43  | 504 | 546 |
| Tbg972.11.9970 | <i>T. brucei</i> | 257 | 32  | 288 |
| Tbg972.11.9970 | <i>T. brucei</i> | 110 | 314 | 423 |
| Tbg972.11.9970 | <i>T. brucei</i> | 88  | 440 | 527 |
| Tbg972.11.9990 | <i>T. brucei</i> | 132 | 281 | 412 |
| Tbg972.3.100   | <i>T. brucei</i> | 85  | 50  | 134 |
| Tbg972.3.100   | <i>T. brucei</i> | 117 | 346 | 462 |
| Tbg972.3.1010  | <i>T. brucei</i> | 132 | 1   | 132 |
| Tbg972.3.1020  | <i>T. brucei</i> | 44  | 58  | 101 |
| Tbg972.3.1020  | <i>T. brucei</i> | 42  | 355 | 396 |
| Tbg972.3.1020  | <i>T. brucei</i> | 86  | 428 | 513 |
| Tbg972.3.1040  | <i>T. brucei</i> | 51  | 611 | 661 |
| Tbg972.3.1040  | <i>T. brucei</i> | 57  | 856 | 912 |

|               |                  |     |      |      |
|---------------|------------------|-----|------|------|
| Tbg972.3.1050 | <i>T. brucei</i> | 42  | 71   | 112  |
| Tbg972.3.1050 | <i>T. brucei</i> | 163 | 248  | 410  |
| Tbg972.3.1060 | <i>T. brucei</i> | 87  | 376  | 462  |
| Tbg972.3.1060 | <i>T. brucei</i> | 76  | 520  | 595  |
| Tbg972.3.1060 | <i>T. brucei</i> | 51  | 752  | 802  |
| Tbg972.3.1070 | <i>T. brucei</i> | 61  | 225  | 285  |
| Tbg972.3.1070 | <i>T. brucei</i> | 81  | 495  | 575  |
| Tbg972.3.1080 | <i>T. brucei</i> | 41  | 1127 | 1167 |
| Tbg972.3.1090 | <i>T. brucei</i> | 43  | 172  | 214  |
| Tbg972.3.1090 | <i>T. brucei</i> | 42  | 490  | 531  |
| Tbg972.3.1090 | <i>T. brucei</i> | 42  | 490  | 531  |
| Tbg972.3.1100 | <i>T. brucei</i> | 47  | 1    | 47   |
| Tbg972.3.1100 | <i>T. brucei</i> | 45  | 249  | 293  |
| Tbg972.3.1120 | <i>T. brucei</i> | 56  | 1    | 56   |
| Tbg972.3.1150 | <i>T. brucei</i> | 41  | 188  | 228  |
| Tbg972.3.1150 | <i>T. brucei</i> | 86  | 249  | 334  |
| Tbg972.3.1170 | <i>T. brucei</i> | 86  | 227  | 312  |
| Tbg972.3.1170 | <i>T. brucei</i> | 60  | 1216 | 1275 |
| Tbg972.3.1170 | <i>T. brucei</i> | 54  | 1454 | 1507 |
| Tbg972.3.1170 | <i>T. brucei</i> | 49  | 1774 | 1822 |
| Tbg972.3.1170 | <i>T. brucei</i> | 41  | 2473 | 2513 |
| Tbg972.3.1170 | <i>T. brucei</i> | 129 | 2554 | 2682 |
| Tbg972.3.1170 | <i>T. brucei</i> | 43  | 2852 | 2894 |
| Tbg972.3.1170 | <i>T. brucei</i> | 44  | 3094 | 3137 |
| Tbg972.3.1170 | <i>T. brucei</i> | 52  | 3173 | 3224 |
| Tbg972.3.1190 | <i>T. brucei</i> | 412 | 88   | 499  |
| Tbg972.3.1220 | <i>T. brucei</i> | 41  | 168  | 208  |
| Tbg972.3.1220 | <i>T. brucei</i> | 102 | 243  | 344  |
| Tbg972.3.1260 | <i>T. brucei</i> | 70  | 164  | 233  |
| Tbg972.3.1270 | <i>T. brucei</i> | 41  | 168  | 208  |
| Tbg972.3.1270 | <i>T. brucei</i> | 102 | 243  | 344  |
| Tbg972.3.1280 | <i>T. brucei</i> | 60  | 127  | 186  |
| Tbg972.3.1320 | <i>T. brucei</i> | 44  | 57   | 100  |
| Tbg972.3.1320 | <i>T. brucei</i> | 40  | 573  | 612  |
| Tbg972.3.1320 | <i>T. brucei</i> | 40  | 573  | 612  |
| Tbg972.3.1330 | <i>T. brucei</i> | 178 | 180  | 357  |
| Tbg972.3.1350 | <i>T. brucei</i> | 44  | 1    | 44   |
| Tbg972.3.1350 | <i>T. brucei</i> | 82  | 123  | 204  |
| Tbg972.3.1350 | <i>T. brucei</i> | 135 | 469  | 603  |
| Tbg972.3.1360 | <i>T. brucei</i> | 47  | 56   | 102  |
| Tbg972.3.1370 | <i>T. brucei</i> | 52  | 1    | 52   |
| Tbg972.3.1370 | <i>T. brucei</i> | 65  | 484  | 548  |
| Tbg972.3.1370 | <i>T. brucei</i> | 65  | 484  | 548  |
| Tbg972.3.1410 | <i>T. brucei</i> | 96  | 1    | 96   |
| Tbg972.3.1410 | <i>T. brucei</i> | 41  | 201  | 241  |
| Tbg972.3.1410 | <i>T. brucei</i> | 46  | 300  | 345  |
| Tbg972.3.1430 | <i>T. brucei</i> | 64  | 253  | 316  |

|               |                  |     |      |      |
|---------------|------------------|-----|------|------|
| Tbg972.3.1430 | <i>T. brucei</i> | 65  | 756  | 820  |
| Tbg972.3.1430 | <i>T. brucei</i> | 68  | 1564 | 1631 |
| Tbg972.3.1440 | <i>T. brucei</i> | 60  | 1    | 60   |
| Tbg972.3.1460 | <i>T. brucei</i> | 48  | 311  | 358  |
| Tbg972.3.1480 | <i>T. brucei</i> | 50  | 1    | 50   |
| Tbg972.3.1490 | <i>T. brucei</i> | 102 | 210  | 311  |
| Tbg972.3.1490 | <i>T. brucei</i> | 132 | 320  | 451  |
| Tbg972.3.1490 | <i>T. brucei</i> | 47  | 530  | 576  |
| Tbg972.3.150  | <i>T. brucei</i> | 80  | 69   | 148  |
| Tbg972.3.150  | <i>T. brucei</i> | 48  | 222  | 269  |
| Tbg972.3.150  | <i>T. brucei</i> | 61  | 372  | 432  |
| Tbg972.3.1500 | <i>T. brucei</i> | 44  | 88   | 131  |
| Tbg972.3.1520 | <i>T. brucei</i> | 65  | 197  | 261  |
| Tbg972.3.1540 | <i>T. brucei</i> | 61  | 71   | 131  |
| Tbg972.3.1550 | <i>T. brucei</i> | 52  | 24   | 75   |
| Tbg972.3.1550 | <i>T. brucei</i> | 130 | 155  | 284  |
| Tbg972.3.1550 | <i>T. brucei</i> | 69  | 310  | 378  |
| Tbg972.3.1610 | <i>T. brucei</i> | 60  | 114  | 173  |
| Tbg972.3.1620 | <i>T. brucei</i> | 75  | 1    | 75   |
| Tbg972.3.1620 | <i>T. brucei</i> | 82  | 235  | 316  |
| Tbg972.3.1620 | <i>T. brucei</i> | 133 | 347  | 479  |
| Tbg972.3.1620 | <i>T. brucei</i> | 59  | 615  | 673  |
| Tbg972.3.1620 | <i>T. brucei</i> | 67  | 727  | 793  |
| Tbg972.3.1660 | <i>T. brucei</i> | 111 | 974  | 1084 |
| Tbg972.3.1660 | <i>T. brucei</i> | 140 | 1321 | 1460 |
| Tbg972.3.1670 | <i>T. brucei</i> | 56  | 75   | 130  |
| Tbg972.3.1670 | <i>T. brucei</i> | 56  | 193  | 248  |
| Tbg972.3.1670 | <i>T. brucei</i> | 56  | 193  | 248  |
| Tbg972.3.1680 | <i>T. brucei</i> | 61  | 44   | 104  |
| Tbg972.3.1680 | <i>T. brucei</i> | 101 | 187  | 287  |
| Tbg972.3.1690 | <i>T. brucei</i> | 42  | 81   | 122  |
| Tbg972.3.1690 | <i>T. brucei</i> | 165 | 206  | 370  |
| Tbg972.3.1710 | <i>T. brucei</i> | 83  | 93   | 175  |
| Tbg972.3.1710 | <i>T. brucei</i> | 41  | 263  | 303  |
| Tbg972.3.1710 | <i>T. brucei</i> | 41  | 263  | 303  |
| Tbg972.3.1730 | <i>T. brucei</i> | 159 | 51   | 209  |
| Tbg972.3.1730 | <i>T. brucei</i> | 104 | 668  | 771  |
| Tbg972.3.1760 | <i>T. brucei</i> | 59  | 285  | 343  |
| Tbg972.3.1760 | <i>T. brucei</i> | 70  | 564  | 633  |
| Tbg972.3.1760 | <i>T. brucei</i> | 70  | 564  | 633  |
| Tbg972.3.1770 | <i>T. brucei</i> | 46  | 1    | 46   |
| Tbg972.3.1790 | <i>T. brucei</i> | 159 | 63   | 221  |
| Tbg972.3.1790 | <i>T. brucei</i> | 358 | 246  | 603  |
| Tbg972.3.180  | <i>T. brucei</i> | 57  | 231  | 287  |
| Tbg972.3.1820 | <i>T. brucei</i> | 184 | 1    | 184  |
| Tbg972.3.1820 | <i>T. brucei</i> | 74  | 234  | 307  |
| Tbg972.3.1820 | <i>T. brucei</i> | 140 | 388  | 527  |

|               |                  |     |      |      |
|---------------|------------------|-----|------|------|
| Tbg972.3.1820 | <i>T. brucei</i> | 59  | 533  | 591  |
| Tbg972.3.1830 | <i>T. brucei</i> | 51  | 1    | 51   |
| Tbg972.3.1840 | <i>T. brucei</i> | 171 | 1    | 171  |
| Tbg972.3.1840 | <i>T. brucei</i> | 305 | 190  | 494  |
| Tbg972.3.1850 | <i>T. brucei</i> | 128 | 95   | 222  |
| Tbg972.3.1900 | <i>T. brucei</i> | 55  | 114  | 168  |
| Tbg972.3.1910 | <i>T. brucei</i> | 100 | 1    | 100  |
| Tbg972.3.1930 | <i>T. brucei</i> | 50  | 163  | 212  |
| Tbg972.3.1940 | <i>T. brucei</i> | 47  | 59   | 105  |
| Tbg972.3.1940 | <i>T. brucei</i> | 47  | 138  | 184  |
| Tbg972.3.1940 | <i>T. brucei</i> | 90  | 252  | 341  |
| Tbg972.3.1950 | <i>T. brucei</i> | 100 | 313  | 412  |
| Tbg972.3.1950 | <i>T. brucei</i> | 47  | 464  | 510  |
| Tbg972.3.1950 | <i>T. brucei</i> | 47  | 543  | 589  |
| Tbg972.3.1950 | <i>T. brucei</i> | 90  | 657  | 746  |
| Tbg972.3.1970 | <i>T. brucei</i> | 151 | 1    | 151  |
| Tbg972.3.1970 | <i>T. brucei</i> | 59  | 362  | 420  |
| Tbg972.3.1970 | <i>T. brucei</i> | 101 | 474  | 574  |
| Tbg972.3.1970 | <i>T. brucei</i> | 86  | 614  | 699  |
| Tbg972.3.1970 | <i>T. brucei</i> | 117 | 890  | 1006 |
| Tbg972.3.1970 | <i>T. brucei</i> | 65  | 1008 | 1072 |
| Tbg972.3.1990 | <i>T. brucei</i> | 41  | 12   | 52   |
| Tbg972.3.1990 | <i>T. brucei</i> | 860 | 720  | 1579 |
| Tbg972.3.200  | <i>T. brucei</i> | 69  | 101  | 169  |
| Tbg972.3.200  | <i>T. brucei</i> | 69  | 177  | 245  |
| Tbg972.3.2000 | <i>T. brucei</i> | 123 | 313  | 435  |
| Tbg972.3.2010 | <i>T. brucei</i> | 43  | 254  | 296  |
| Tbg972.3.2010 | <i>T. brucei</i> | 61  | 395  | 455  |
| Tbg972.3.2010 | <i>T. brucei</i> | 84  | 748  | 831  |
| Tbg972.3.2040 | <i>T. brucei</i> | 57  | 43   | 99   |
| Tbg972.3.2050 | <i>T. brucei</i> | 150 | 1    | 150  |
| Tbg972.3.2050 | <i>T. brucei</i> | 80  | 153  | 232  |
| Tbg972.3.2070 | <i>T. brucei</i> | 50  | 1    | 50   |
| Tbg972.3.2070 | <i>T. brucei</i> | 40  | 86   | 125  |
| Tbg972.3.2070 | <i>T. brucei</i> | 40  | 86   | 125  |
| Tbg972.3.2090 | <i>T. brucei</i> | 145 | 1    | 145  |
| Tbg972.3.2090 | <i>T. brucei</i> | 69  | 694  | 762  |
| Tbg972.3.2090 | <i>T. brucei</i> | 69  | 694  | 762  |
| Tbg972.3.210  | <i>T. brucei</i> | 113 | 110  | 222  |
| Tbg972.3.2100 | <i>T. brucei</i> | 70  | 1    | 70   |
| Tbg972.3.2150 | <i>T. brucei</i> | 119 | 1    | 119  |
| Tbg972.3.2160 | <i>T. brucei</i> | 63  | 256  | 318  |
| Tbg972.3.2170 | <i>T. brucei</i> | 85  | 56   | 140  |
| Tbg972.3.2190 | <i>T. brucei</i> | 91  | 1    | 91   |
| Tbg972.3.2190 | <i>T. brucei</i> | 68  | 153  | 220  |
| Tbg972.3.2190 | <i>T. brucei</i> | 68  | 153  | 220  |
| Tbg972.3.220  | <i>T. brucei</i> | 45  | 142  | 186  |

|               |                  |     |      |      |
|---------------|------------------|-----|------|------|
| Tbg972.3.2200 | <i>T. brucei</i> | 57  | 245  | 301  |
| Tbg972.3.2220 | <i>T. brucei</i> | 43  | 22   | 64   |
| Tbg972.3.2220 | <i>T. brucei</i> | 47  | 66   | 112  |
| Tbg972.3.2220 | <i>T. brucei</i> | 47  | 66   | 112  |
| Tbg972.3.2230 | <i>T. brucei</i> | 72  | 157  | 228  |
| Tbg972.3.2270 | <i>T. brucei</i> | 153 | 204  | 356  |
| Tbg972.3.2280 | <i>T. brucei</i> | 65  | 46   | 110  |
| Tbg972.3.2290 | <i>T. brucei</i> | 54  | 1    | 54   |
| Tbg972.3.2290 | <i>T. brucei</i> | 41  | 65   | 105  |
| Tbg972.3.2290 | <i>T. brucei</i> | 41  | 65   | 105  |
| Tbg972.3.230  | <i>T. brucei</i> | 40  | 26   | 65   |
| Tbg972.3.230  | <i>T. brucei</i> | 105 | 96   | 200  |
| Tbg972.3.230  | <i>T. brucei</i> | 66  | 493  | 558  |
| Tbg972.3.230  | <i>T. brucei</i> | 52  | 788  | 839  |
| Tbg972.3.2310 | <i>T. brucei</i> | 120 | 361  | 480  |
| Tbg972.3.2310 | <i>T. brucei</i> | 67  | 519  | 585  |
| Tbg972.3.2330 | <i>T. brucei</i> | 53  | 31   | 83   |
| Tbg972.3.2410 | <i>T. brucei</i> | 68  | 1    | 68   |
| Tbg972.3.2420 | <i>T. brucei</i> | 45  | 83   | 127  |
| Tbg972.3.2430 | <i>T. brucei</i> | 63  | 1    | 63   |
| Tbg972.3.2430 | <i>T. brucei</i> | 61  | 346  | 406  |
| Tbg972.3.2450 | <i>T. brucei</i> | 45  | 64   | 108  |
| Tbg972.3.2470 | <i>T. brucei</i> | 125 | 1    | 125  |
| Tbg972.3.2470 | <i>T. brucei</i> | 93  | 516  | 608  |
| Tbg972.3.2480 | <i>T. brucei</i> | 70  | 1    | 70   |
| Tbg972.3.250  | <i>T. brucei</i> | 51  | 193  | 243  |
| Tbg972.3.2500 | <i>T. brucei</i> | 211 | 391  | 601  |
| Tbg972.3.2500 | <i>T. brucei</i> | 52  | 639  | 690  |
| Tbg972.3.2500 | <i>T. brucei</i> | 52  | 639  | 690  |
| Tbg972.3.2510 | <i>T. brucei</i> | 48  | 79   | 126  |
| Tbg972.3.2510 | <i>T. brucei</i> | 70  | 330  | 399  |
| Tbg972.3.2510 | <i>T. brucei</i> | 70  | 330  | 399  |
| Tbg972.3.2520 | <i>T. brucei</i> | 80  | 69   | 148  |
| Tbg972.3.2550 | <i>T. brucei</i> | 52  | 170  | 221  |
| Tbg972.3.2550 | <i>T. brucei</i> | 125 | 238  | 362  |
| Tbg972.3.2560 | <i>T. brucei</i> | 108 | 106  | 213  |
| Tbg972.3.2570 | <i>T. brucei</i> | 104 | 106  | 209  |
| Tbg972.3.2580 | <i>T. brucei</i> | 104 | 106  | 209  |
| Tbg972.3.2590 | <i>T. brucei</i> | 107 | 138  | 244  |
| Tbg972.3.2610 | <i>T. brucei</i> | 206 | 85   | 290  |
| Tbg972.3.2650 | <i>T. brucei</i> | 178 | 607  | 784  |
| Tbg972.3.2650 | <i>T. brucei</i> | 67  | 1389 | 1455 |
| Tbg972.3.2650 | <i>T. brucei</i> | 85  | 1487 | 1571 |
| Tbg972.3.2650 | <i>T. brucei</i> | 48  | 1915 | 1962 |
| Tbg972.3.2660 | <i>T. brucei</i> | 61  | 1    | 61   |
| Tbg972.3.2670 | <i>T. brucei</i> | 98  | 254  | 351  |
| Tbg972.3.2670 | <i>T. brucei</i> | 96  | 384  | 479  |

|               |                  |     |      |      |
|---------------|------------------|-----|------|------|
| Tbg972.3.2670 | <i>T. brucei</i> | 44  | 1104 | 1147 |
| Tbg972.3.2670 | <i>T. brucei</i> | 91  | 1614 | 1704 |
| Tbg972.3.2670 | <i>T. brucei</i> | 70  | 1885 | 1954 |
| Tbg972.3.2690 | <i>T. brucei</i> | 82  | 20   | 101  |
| Tbg972.3.2690 | <i>T. brucei</i> | 88  | 464  | 551  |
| Tbg972.3.2690 | <i>T. brucei</i> | 51  | 732  | 782  |
| Tbg972.3.270  | <i>T. brucei</i> | 87  | 292  | 378  |
| Tbg972.3.2700 | <i>T. brucei</i> | 90  | 101  | 190  |
| Tbg972.3.2700 | <i>T. brucei</i> | 64  | 262  | 325  |
| Tbg972.3.2720 | <i>T. brucei</i> | 50  | 1    | 50   |
| Tbg972.3.2720 | <i>T. brucei</i> | 62  | 408  | 469  |
| Tbg972.3.2720 | <i>T. brucei</i> | 148 | 582  | 729  |
| Tbg972.3.2730 | <i>T. brucei</i> | 59  | 32   | 90   |
| Tbg972.3.2730 | <i>T. brucei</i> | 40  | 135  | 174  |
| Tbg972.3.2740 | <i>T. brucei</i> | 43  | 1    | 43   |
| Tbg972.3.2760 | <i>T. brucei</i> | 117 | 16   | 132  |
| Tbg972.3.2760 | <i>T. brucei</i> | 92  | 138  | 229  |
| Tbg972.3.2760 | <i>T. brucei</i> | 42  | 338  | 379  |
| Tbg972.3.2760 | <i>T. brucei</i> | 43  | 538  | 580  |
| Tbg972.3.2760 | <i>T. brucei</i> | 45  | 608  | 652  |
| Tbg972.3.2760 | <i>T. brucei</i> | 79  | 704  | 782  |
| Tbg972.3.2760 | <i>T. brucei</i> | 272 | 829  | 1100 |
| Tbg972.3.2760 | <i>T. brucei</i> | 61  | 1139 | 1199 |
| Tbg972.3.2760 | <i>T. brucei</i> | 43  | 1234 | 1276 |
| Tbg972.3.2770 | <i>T. brucei</i> | 93  | 15   | 107  |
| Tbg972.3.2770 | <i>T. brucei</i> | 47  | 156  | 202  |
| Tbg972.3.2770 | <i>T. brucei</i> | 109 | 231  | 339  |
| Tbg972.3.2780 | <i>T. brucei</i> | 254 | 1    | 254  |
| Tbg972.3.2780 | <i>T. brucei</i> | 90  | 376  | 465  |
| Tbg972.3.2790 | <i>T. brucei</i> | 44  | 1    | 44   |
| Tbg972.3.2790 | <i>T. brucei</i> | 49  | 84   | 132  |
| Tbg972.3.2790 | <i>T. brucei</i> | 49  | 84   | 132  |
| Tbg972.3.280  | <i>T. brucei</i> | 180 | 1    | 180  |
| Tbg972.3.280  | <i>T. brucei</i> | 115 | 276  | 390  |
| Tbg972.3.2800 | <i>T. brucei</i> | 49  | 1    | 49   |
| Tbg972.3.2800 | <i>T. brucei</i> | 59  | 59   | 117  |
| Tbg972.3.2800 | <i>T. brucei</i> | 95  | 135  | 229  |
| Tbg972.3.2800 | <i>T. brucei</i> | 458 | 309  | 766  |
| Tbg972.3.2800 | <i>T. brucei</i> | 43  | 793  | 835  |
| Tbg972.3.2800 | <i>T. brucei</i> | 65  | 892  | 956  |
| Tbg972.3.2800 | <i>T. brucei</i> | 101 | 1057 | 1157 |
| Tbg972.3.2800 | <i>T. brucei</i> | 140 | 1213 | 1352 |
| Tbg972.3.2800 | <i>T. brucei</i> | 184 | 1366 | 1549 |
| Tbg972.3.2800 | <i>T. brucei</i> | 118 | 1577 | 1694 |
| Tbg972.3.2810 | <i>T. brucei</i> | 47  | 1    | 47   |
| Tbg972.3.2820 | <i>T. brucei</i> | 97  | 47   | 143  |
| Tbg972.3.2820 | <i>T. brucei</i> | 45  | 461  | 505  |

|               |                  |     |      |      |
|---------------|------------------|-----|------|------|
| Tbg972.3.2820 | <i>T. brucei</i> | 43  | 629  | 671  |
| Tbg972.3.2820 | <i>T. brucei</i> | 106 | 766  | 871  |
| Tbg972.3.2830 | <i>T. brucei</i> | 233 | 1    | 233  |
| Tbg972.3.2830 | <i>T. brucei</i> | 135 | 378  | 512  |
| Tbg972.3.2830 | <i>T. brucei</i> | 260 | 699  | 958  |
| Tbg972.3.2830 | <i>T. brucei</i> | 56  | 996  | 1051 |
| Tbg972.3.2830 | <i>T. brucei</i> | 315 | 1053 | 1367 |
| Tbg972.3.2830 | <i>T. brucei</i> | 86  | 1376 | 1461 |
| Tbg972.3.2830 | <i>T. brucei</i> | 72  | 1487 | 1558 |
| Tbg972.3.2850 | <i>T. brucei</i> | 66  | 69   | 134  |
| Tbg972.3.2850 | <i>T. brucei</i> | 43  | 922  | 964  |
| Tbg972.3.2850 | <i>T. brucei</i> | 43  | 922  | 964  |
| Tbg972.3.2860 | <i>T. brucei</i> | 207 | 133  | 339  |
| Tbg972.3.2860 | <i>T. brucei</i> | 98  | 341  | 438  |
| Tbg972.3.2860 | <i>T. brucei</i> | 103 | 557  | 659  |
| Tbg972.3.2860 | <i>T. brucei</i> | 280 | 681  | 960  |
| Tbg972.3.2880 | <i>T. brucei</i> | 103 | 32   | 134  |
| Tbg972.3.2880 | <i>T. brucei</i> | 55  | 521  | 575  |
| Tbg972.3.2880 | <i>T. brucei</i> | 62  | 641  | 702  |
| Tbg972.3.2890 | <i>T. brucei</i> | 67  | 63   | 129  |
| Tbg972.3.2890 | <i>T. brucei</i> | 52  | 185  | 236  |
| Tbg972.3.2890 | <i>T. brucei</i> | 67  | 411  | 477  |
| Tbg972.3.2900 | <i>T. brucei</i> | 71  | 294  | 364  |
| Tbg972.3.2970 | <i>T. brucei</i> | 64  | 355  | 418  |
| Tbg972.3.2980 | <i>T. brucei</i> | 136 | 1    | 136  |
| Tbg972.3.300  | <i>T. brucei</i> | 278 | 306  | 583  |
| Tbg972.3.3000 | <i>T. brucei</i> | 137 | 1    | 137  |
| Tbg972.3.3030 | <i>T. brucei</i> | 55  | 554  | 608  |
| Tbg972.3.3030 | <i>T. brucei</i> | 139 | 621  | 759  |
| Tbg972.3.3130 | <i>T. brucei</i> | 79  | 241  | 319  |
| Tbg972.3.3170 | <i>T. brucei</i> | 41  | 47   | 87   |
| Tbg972.3.320  | <i>T. brucei</i> | 62  | 448  | 509  |
| Tbg972.3.3210 | <i>T. brucei</i> | 207 | 25   | 231  |
| Tbg972.3.3220 | <i>T. brucei</i> | 52  | 1    | 52   |
| Tbg972.3.3220 | <i>T. brucei</i> | 191 | 92   | 282  |
| Tbg972.3.3220 | <i>T. brucei</i> | 259 | 642  | 900  |
| Tbg972.3.3230 | <i>T. brucei</i> | 150 | 314  | 463  |
| Tbg972.3.3240 | <i>T. brucei</i> | 183 | 731  | 913  |
| Tbg972.3.3270 | <i>T. brucei</i> | 40  | 501  | 540  |
| Tbg972.3.3270 | <i>T. brucei</i> | 60  | 650  | 709  |
| Tbg972.3.3270 | <i>T. brucei</i> | 46  | 846  | 891  |
| Tbg972.3.3270 | <i>T. brucei</i> | 46  | 1016 | 1061 |
| Tbg972.3.3290 | <i>T. brucei</i> | 41  | 106  | 146  |
| Tbg972.3.3290 | <i>T. brucei</i> | 53  | 190  | 242  |
| Tbg972.3.3290 | <i>T. brucei</i> | 43  | 405  | 447  |
| Tbg972.3.3290 | <i>T. brucei</i> | 111 | 473  | 583  |
| Tbg972.3.3290 | <i>T. brucei</i> | 79  | 703  | 781  |

|               |                  |     |      |      |
|---------------|------------------|-----|------|------|
| Tbg972.3.3290 | <i>T. brucei</i> | 71  | 820  | 890  |
| Tbg972.3.3290 | <i>T. brucei</i> | 218 | 923  | 1140 |
| Tbg972.3.3290 | <i>T. brucei</i> | 163 | 1144 | 1306 |
| Tbg972.3.3310 | <i>T. brucei</i> | 108 | 1    | 108  |
| Tbg972.3.3310 | <i>T. brucei</i> | 61  | 122  | 182  |
| Tbg972.3.3310 | <i>T. brucei</i> | 55  | 424  | 478  |
| Tbg972.3.3310 | <i>T. brucei</i> | 81  | 637  | 717  |
| Tbg972.3.3310 | <i>T. brucei</i> | 67  | 719  | 785  |
| Tbg972.3.3330 | <i>T. brucei</i> | 60  | 1    | 60   |
| Tbg972.3.3330 | <i>T. brucei</i> | 249 | 135  | 383  |
| Tbg972.3.3330 | <i>T. brucei</i> | 67  | 469  | 535  |
| Tbg972.3.3350 | <i>T. brucei</i> | 57  | 1    | 57   |
| Tbg972.3.3350 | <i>T. brucei</i> | 62  | 90   | 151  |
| Tbg972.3.3350 | <i>T. brucei</i> | 665 | 199  | 863  |
| Tbg972.3.3360 | <i>T. brucei</i> | 165 | 143  | 307  |
| Tbg972.3.3370 | <i>T. brucei</i> | 159 | 114  | 272  |
| Tbg972.3.3380 | <i>T. brucei</i> | 64  | 787  | 850  |
| Tbg972.3.3380 | <i>T. brucei</i> | 45  | 857  | 901  |
| Tbg972.3.3380 | <i>T. brucei</i> | 45  | 857  | 901  |
| Tbg972.3.340  | <i>T. brucei</i> | 91  | 50   | 140  |
| Tbg972.3.340  | <i>T. brucei</i> | 79  | 144  | 222  |
| Tbg972.3.3410 | <i>T. brucei</i> | 42  | 15   | 56   |
| Tbg972.3.3420 | <i>T. brucei</i> | 263 | 1    | 263  |
| Tbg972.3.3430 | <i>T. brucei</i> | 78  | 1    | 78   |
| Tbg972.3.3440 | <i>T. brucei</i> | 67  | 52   | 118  |
| Tbg972.3.3440 | <i>T. brucei</i> | 48  | 362  | 409  |
| Tbg972.3.3450 | <i>T. brucei</i> | 58  | 1    | 58   |
| Tbg972.3.3460 | <i>T. brucei</i> | 320 | 1    | 320  |
| Tbg972.3.3460 | <i>T. brucei</i> | 97  | 337  | 433  |
| Tbg972.3.3460 | <i>T. brucei</i> | 341 | 438  | 778  |
| Tbg972.3.3470 | <i>T. brucei</i> | 55  | 25   | 79   |
| Tbg972.3.3470 | <i>T. brucei</i> | 90  | 140  | 229  |
| Tbg972.3.3470 | <i>T. brucei</i> | 90  | 140  | 229  |
| Tbg972.3.3480 | <i>T. brucei</i> | 68  | 1    | 68   |
| Tbg972.3.3480 | <i>T. brucei</i> | 90  | 129  | 218  |
| Tbg972.3.3480 | <i>T. brucei</i> | 90  | 129  | 218  |
| Tbg972.3.3500 | <i>T. brucei</i> | 63  | 200  | 262  |
| Tbg972.3.3510 | <i>T. brucei</i> | 88  | 131  | 218  |
| Tbg972.3.3510 | <i>T. brucei</i> | 212 | 372  | 583  |
| Tbg972.3.3520 | <i>T. brucei</i> | 41  | 32   | 72   |
| Tbg972.3.3530 | <i>T. brucei</i> | 56  | 236  | 291  |
| Tbg972.3.3540 | <i>T. brucei</i> | 49  | 21   | 69   |
| Tbg972.3.3540 | <i>T. brucei</i> | 93  | 72   | 164  |
| Tbg972.3.3540 | <i>T. brucei</i> | 93  | 72   | 164  |
| Tbg972.3.3550 | <i>T. brucei</i> | 113 | 199  | 311  |
| Tbg972.3.3550 | <i>T. brucei</i> | 67  | 343  | 409  |
| Tbg972.3.3550 | <i>T. brucei</i> | 67  | 343  | 409  |



|               |                  |     |      |      |
|---------------|------------------|-----|------|------|
| Tbg972.3.3560 | <i>T. brucei</i> | 72  | 199  | 270  |
| Tbg972.3.3580 | <i>T. brucei</i> | 96  | 851  | 946  |
| Tbg972.3.3580 | <i>T. brucei</i> | 60  | 1297 | 1356 |
| Tbg972.3.3580 | <i>T. brucei</i> | 71  | 1410 | 1480 |
| Tbg972.3.3580 | <i>T. brucei</i> | 64  | 1522 | 1585 |
| Tbg972.3.360  | <i>T. brucei</i> | 89  | 1    | 89   |
| Tbg972.3.3600 | <i>T. brucei</i> | 67  | 1    | 67   |
| Tbg972.3.3660 | <i>T. brucei</i> | 92  | 1    | 92   |
| Tbg972.3.3660 | <i>T. brucei</i> | 67  | 162  | 228  |
| Tbg972.3.3670 | <i>T. brucei</i> | 85  | 1    | 85   |
| Tbg972.3.3710 | <i>T. brucei</i> | 92  | 89   | 180  |
| Tbg972.3.3730 | <i>T. brucei</i> | 49  | 41   | 89   |
| Tbg972.3.3740 | <i>T. brucei</i> | 73  | 60   | 132  |
| Tbg972.3.3740 | <i>T. brucei</i> | 115 | 157  | 271  |
| Tbg972.3.3750 | <i>T. brucei</i> | 47  | 43   | 89   |
| Tbg972.3.3770 | <i>T. brucei</i> | 169 | 1    | 169  |
| Tbg972.3.3770 | <i>T. brucei</i> | 97  | 348  | 444  |
| Tbg972.3.3780 | <i>T. brucei</i> | 105 | 46   | 150  |
| Tbg972.3.3780 | <i>T. brucei</i> | 239 | 189  | 427  |
| Tbg972.3.3790 | <i>T. brucei</i> | 112 | 120  | 231  |
| Tbg972.3.3790 | <i>T. brucei</i> | 79  | 316  | 394  |
| Tbg972.3.3790 | <i>T. brucei</i> | 79  | 316  | 394  |
| Tbg972.3.380  | <i>T. brucei</i> | 48  | 1    | 48   |
| Tbg972.3.380  | <i>T. brucei</i> | 50  | 102  | 151  |
| Tbg972.3.380  | <i>T. brucei</i> | 46  | 339  | 384  |
| Tbg972.3.380  | <i>T. brucei</i> | 47  | 403  | 449  |
| Tbg972.3.3800 | <i>T. brucei</i> | 81  | 1    | 81   |
| Tbg972.3.3800 | <i>T. brucei</i> | 75  | 253  | 327  |
| Tbg972.3.3800 | <i>T. brucei</i> | 62  | 365  | 426  |
| Tbg972.3.3800 | <i>T. brucei</i> | 77  | 435  | 511  |
| Tbg972.3.3810 | <i>T. brucei</i> | 43  | 74   | 116  |
| Tbg972.3.3820 | <i>T. brucei</i> | 70  | 444  | 513  |
| Tbg972.3.3830 | <i>T. brucei</i> | 106 | 23   | 128  |
| Tbg972.3.3830 | <i>T. brucei</i> | 54  | 179  | 232  |
| Tbg972.3.3840 | <i>T. brucei</i> | 97  | 1    | 97   |
| Tbg972.3.3850 | <i>T. brucei</i> | 63  | 95   | 157  |
| Tbg972.3.3850 | <i>T. brucei</i> | 60  | 554  | 613  |
| Tbg972.3.3850 | <i>T. brucei</i> | 60  | 554  | 613  |
| Tbg972.3.3860 | <i>T. brucei</i> | 79  | 1    | 79   |
| Tbg972.3.3860 | <i>T. brucei</i> | 285 | 131  | 415  |
| Tbg972.3.3860 | <i>T. brucei</i> | 76  | 472  | 547  |
| Tbg972.3.3860 | <i>T. brucei</i> | 52  | 621  | 672  |
| Tbg972.3.3870 | <i>T. brucei</i> | 68  | 112  | 179  |
| Tbg972.3.3890 | <i>T. brucei</i> | 48  | 314  | 361  |
| Tbg972.3.390  | <i>T. brucei</i> | 45  | 137  | 181  |
| Tbg972.3.3900 | <i>T. brucei</i> | 156 | 1    | 156  |
| Tbg972.3.3940 | <i>T. brucei</i> | 46  | 333  | 378  |

|               |                  |     |      |      |
|---------------|------------------|-----|------|------|
| Tbg972.3.3950 | <i>T. brucei</i> | 53  | 252  | 304  |
| Tbg972.3.3950 | <i>T. brucei</i> | 124 | 399  | 522  |
| Tbg972.3.3970 | <i>T. brucei</i> | 118 | 1    | 118  |
| Tbg972.3.3970 | <i>T. brucei</i> | 58  | 325  | 382  |
| Tbg972.3.3970 | <i>T. brucei</i> | 153 | 471  | 623  |
| Tbg972.3.3990 | <i>T. brucei</i> | 87  | 43   | 129  |
| Tbg972.3.4010 | <i>T. brucei</i> | 71  | 1    | 71   |
| Tbg972.3.4030 | <i>T. brucei</i> | 48  | 1    | 48   |
| Tbg972.3.4040 | <i>T. brucei</i> | 48  | 978  | 1025 |
| Tbg972.3.4040 | <i>T. brucei</i> | 50  | 1470 | 1519 |
| Tbg972.3.4040 | <i>T. brucei</i> | 50  | 1470 | 1519 |
| Tbg972.3.4050 | <i>T. brucei</i> | 89  | 1    | 89   |
| Tbg972.3.4050 | <i>T. brucei</i> | 40  | 153  | 192  |
| Tbg972.3.4050 | <i>T. brucei</i> | 114 | 311  | 424  |
| Tbg972.3.4050 | <i>T. brucei</i> | 133 | 469  | 601  |
| Tbg972.3.4060 | <i>T. brucei</i> | 45  | 1    | 45   |
| Tbg972.3.4080 | <i>T. brucei</i> | 49  | 1    | 49   |
| Tbg972.3.4080 | <i>T. brucei</i> | 113 | 61   | 173  |
| Tbg972.3.4080 | <i>T. brucei</i> | 113 | 61   | 173  |
| Tbg972.3.410  | <i>T. brucei</i> | 44  | 285  | 328  |
| Tbg972.3.4120 | <i>T. brucei</i> | 49  | 1    | 49   |
| Tbg972.3.4120 | <i>T. brucei</i> | 113 | 61   | 173  |
| Tbg972.3.4120 | <i>T. brucei</i> | 113 | 61   | 173  |
| Tbg972.3.4130 | <i>T. brucei</i> | 68  | 97   | 164  |
| Tbg972.3.4130 | <i>T. brucei</i> | 68  | 517  | 584  |
| Tbg972.3.4130 | <i>T. brucei</i> | 81  | 831  | 911  |
| Tbg972.3.4130 | <i>T. brucei</i> | 74  | 951  | 1024 |
| Tbg972.3.4160 | <i>T. brucei</i> | 60  | 91   | 150  |
| Tbg972.3.4190 | <i>T. brucei</i> | 215 | 137  | 351  |
| Tbg972.3.4200 | <i>T. brucei</i> | 386 | 1    | 386  |
| Tbg972.3.4200 | <i>T. brucei</i> | 241 | 426  | 666  |
| Tbg972.3.4200 | <i>T. brucei</i> | 42  | 777  | 818  |
| Tbg972.3.4200 | <i>T. brucei</i> | 309 | 1079 | 1387 |
| Tbg972.3.4210 | <i>T. brucei</i> | 57  | 26   | 82   |
| Tbg972.3.4210 | <i>T. brucei</i> | 52  | 172  | 223  |
| Tbg972.3.4210 | <i>T. brucei</i> | 80  | 465  | 544  |
| Tbg972.3.4210 | <i>T. brucei</i> | 61  | 785  | 845  |
| Tbg972.3.4210 | <i>T. brucei</i> | 65  | 910  | 974  |
| Tbg972.3.4220 | <i>T. brucei</i> | 112 | 1    | 112  |
| Tbg972.3.4220 | <i>T. brucei</i> | 89  | 725  | 813  |
| Tbg972.3.4220 | <i>T. brucei</i> | 71  | 884  | 954  |
| Tbg972.3.4240 | <i>T. brucei</i> | 68  | 70   | 137  |
| Tbg972.3.4250 | <i>T. brucei</i> | 63  | 35   | 97   |
| Tbg972.3.4260 | <i>T. brucei</i> | 59  | 445  | 503  |
| Tbg972.3.4270 | <i>T. brucei</i> | 53  | 1    | 53   |
| Tbg972.3.4280 | <i>T. brucei</i> | 59  | 184  | 242  |
| Tbg972.3.4290 | <i>T. brucei</i> | 71  | 63   | 133  |

|               |                  |     |      |      |
|---------------|------------------|-----|------|------|
| Tbg972.3.430  | <i>T. brucei</i> | 51  | 1    | 51   |
| Tbg972.3.4300 | <i>T. brucei</i> | 86  | 1    | 86   |
| Tbg972.3.4300 | <i>T. brucei</i> | 189 | 238  | 426  |
| Tbg972.3.4310 | <i>T. brucei</i> | 130 | 1    | 130  |
| Tbg972.3.4310 | <i>T. brucei</i> | 74  | 305  | 378  |
| Tbg972.3.4310 | <i>T. brucei</i> | 130 | 443  | 572  |
| Tbg972.3.4320 | <i>T. brucei</i> | 266 | 1    | 266  |
| Tbg972.3.4320 | <i>T. brucei</i> | 104 | 329  | 432  |
| Tbg972.3.4320 | <i>T. brucei</i> | 110 | 443  | 552  |
| Tbg972.3.4330 | <i>T. brucei</i> | 102 | 176  | 277  |
| Tbg972.3.4340 | <i>T. brucei</i> | 127 | 58   | 184  |
| Tbg972.3.4360 | <i>T. brucei</i> | 97  | 48   | 144  |
| Tbg972.3.4360 | <i>T. brucei</i> | 72  | 150  | 221  |
| Tbg972.3.4360 | <i>T. brucei</i> | 73  | 262  | 334  |
| Tbg972.3.4370 | <i>T. brucei</i> | 40  | 1    | 40   |
| Tbg972.3.4370 | <i>T. brucei</i> | 59  | 62   | 120  |
| Tbg972.3.4380 | <i>T. brucei</i> | 43  | 254  | 296  |
| Tbg972.3.4410 | <i>T. brucei</i> | 43  | 1623 | 1665 |
| Tbg972.3.4430 | <i>T. brucei</i> | 84  | 90   | 173  |
| Tbg972.3.4430 | <i>T. brucei</i> | 47  | 222  | 268  |
| Tbg972.3.4430 | <i>T. brucei</i> | 65  | 280  | 344  |
| Tbg972.3.4430 | <i>T. brucei</i> | 85  | 347  | 431  |
| Tbg972.3.4440 | <i>T. brucei</i> | 88  | 1    | 88   |
| Tbg972.3.4450 | <i>T. brucei</i> | 74  | 1    | 74   |
| Tbg972.3.4530 | <i>T. brucei</i> | 45  | 207  | 251  |
| Tbg972.3.4550 | <i>T. brucei</i> | 81  | 1    | 81   |
| Tbg972.3.4550 | <i>T. brucei</i> | 42  | 368  | 409  |
| Tbg972.3.4560 | <i>T. brucei</i> | 75  | 291  | 365  |
| Tbg972.3.4580 | <i>T. brucei</i> | 100 | 209  | 308  |
| Tbg972.3.4580 | <i>T. brucei</i> | 75  | 352  | 426  |
| Tbg972.3.4590 | <i>T. brucei</i> | 65  | 1    | 65   |
| Tbg972.3.460  | <i>T. brucei</i> | 58  | 93   | 150  |
| Tbg972.3.460  | <i>T. brucei</i> | 65  | 329  | 393  |
| Tbg972.3.460  | <i>T. brucei</i> | 65  | 329  | 393  |
| Tbg972.3.4600 | <i>T. brucei</i> | 46  | 1    | 46   |
| Tbg972.3.4600 | <i>T. brucei</i> | 55  | 59   | 113  |
| Tbg972.3.4600 | <i>T. brucei</i> | 201 | 135  | 335  |
| Tbg972.3.4620 | <i>T. brucei</i> | 40  | 174  | 213  |
| Tbg972.3.4630 | <i>T. brucei</i> | 59  | 81   | 139  |
| Tbg972.3.4630 | <i>T. brucei</i> | 57  | 243  | 299  |
| Tbg972.3.4630 | <i>T. brucei</i> | 82  | 850  | 931  |
| Tbg972.3.4630 | <i>T. brucei</i> | 53  | 1028 | 1080 |
| Tbg972.3.4640 | <i>T. brucei</i> | 88  | 1    | 88   |
| Tbg972.3.4650 | <i>T. brucei</i> | 65  | 534  | 598  |
| Tbg972.3.4650 | <i>T. brucei</i> | 122 | 781  | 902  |
| Tbg972.3.4650 | <i>T. brucei</i> | 75  | 1314 | 1388 |
| Tbg972.3.470  | <i>T. brucei</i> | 53  | 312  | 364  |

|               |                  |     |      |      |
|---------------|------------------|-----|------|------|
| Tbg972.3.4700 | <i>T. brucei</i> | 264 | 653  | 916  |
| Tbg972.3.4720 | <i>T. brucei</i> | 77  | 138  | 214  |
| Tbg972.3.4720 | <i>T. brucei</i> | 124 | 237  | 360  |
| Tbg972.3.4720 | <i>T. brucei</i> | 119 | 471  | 589  |
| Tbg972.3.4730 | <i>T. brucei</i> | 77  | 57   | 133  |
| Tbg972.3.4730 | <i>T. brucei</i> | 124 | 156  | 279  |
| Tbg972.3.4730 | <i>T. brucei</i> | 119 | 390  | 508  |
| Tbg972.3.4750 | <i>T. brucei</i> | 79  | 417  | 495  |
| Tbg972.3.4750 | <i>T. brucei</i> | 83  | 497  | 579  |
| Tbg972.3.4750 | <i>T. brucei</i> | 46  | 639  | 684  |
| Tbg972.3.4770 | <i>T. brucei</i> | 48  | 49   | 96   |
| Tbg972.3.4770 | <i>T. brucei</i> | 40  | 158  | 197  |
| Tbg972.3.4770 | <i>T. brucei</i> | 40  | 158  | 197  |
| Tbg972.3.480  | <i>T. brucei</i> | 96  | 27   | 122  |
| Tbg972.3.480  | <i>T. brucei</i> | 42  | 187  | 228  |
| Tbg972.3.480  | <i>T. brucei</i> | 155 | 415  | 569  |
| Tbg972.3.480  | <i>T. brucei</i> | 146 | 609  | 754  |
| Tbg972.3.4820 | <i>T. brucei</i> | 67  | 42   | 108  |
| Tbg972.3.4840 | <i>T. brucei</i> | 104 | 164  | 267  |
| Tbg972.3.4850 | <i>T. brucei</i> | 44  | 12   | 55   |
| Tbg972.3.4870 | <i>T. brucei</i> | 48  | 508  | 555  |
| Tbg972.3.4930 | <i>T. brucei</i> | 42  | 1    | 42   |
| Tbg972.3.4950 | <i>T. brucei</i> | 69  | 151  | 219  |
| Tbg972.3.4950 | <i>T. brucei</i> | 65  | 229  | 293  |
| Tbg972.3.4950 | <i>T. brucei</i> | 99  | 866  | 964  |
| Tbg972.3.4950 | <i>T. brucei</i> | 57  | 1138 | 1194 |
| Tbg972.3.4990 | <i>T. brucei</i> | 43  | 215  | 257  |
| Tbg972.3.4990 | <i>T. brucei</i> | 46  | 309  | 354  |
| Tbg972.3.4990 | <i>T. brucei</i> | 46  | 309  | 354  |
| Tbg972.3.5000 | <i>T. brucei</i> | 52  | 624  | 675  |
| Tbg972.3.5010 | <i>T. brucei</i> | 46  | 146  | 191  |
| Tbg972.3.5020 | <i>T. brucei</i> | 48  | 47   | 94   |
| Tbg972.3.5030 | <i>T. brucei</i> | 41  | 381  | 421  |
| Tbg972.3.5030 | <i>T. brucei</i> | 55  | 430  | 484  |
| Tbg972.3.5040 | <i>T. brucei</i> | 91  | 188  | 278  |
| Tbg972.3.5060 | <i>T. brucei</i> | 88  | 1    | 88   |
| Tbg972.3.5060 | <i>T. brucei</i> | 97  | 100  | 196  |
| Tbg972.3.5060 | <i>T. brucei</i> | 67  | 207  | 273  |
| Tbg972.3.5060 | <i>T. brucei</i> | 47  | 322  | 368  |
| Tbg972.3.5060 | <i>T. brucei</i> | 40  | 437  | 476  |
| Tbg972.3.5060 | <i>T. brucei</i> | 51  | 518  | 568  |
| Tbg972.3.5060 | <i>T. brucei</i> | 62  | 653  | 714  |
| Tbg972.3.5060 | <i>T. brucei</i> | 145 | 716  | 860  |
| Tbg972.3.5080 | <i>T. brucei</i> | 48  | 1    | 48   |
| Tbg972.3.510  | <i>T. brucei</i> | 54  | 1    | 54   |
| Tbg972.3.510  | <i>T. brucei</i> | 47  | 219  | 265  |
| Tbg972.3.510  | <i>T. brucei</i> | 45  | 356  | 400  |

|               |                  |     |      |      |
|---------------|------------------|-----|------|------|
| Tbg972.3.5100 | <i>T. brucei</i> | 63  | 1    | 63   |
| Tbg972.3.5100 | <i>T. brucei</i> | 88  | 91   | 178  |
| Tbg972.3.5100 | <i>T. brucei</i> | 124 | 182  | 305  |
| Tbg972.3.5120 | <i>T. brucei</i> | 52  | 947  | 998  |
| Tbg972.3.5120 | <i>T. brucei</i> | 41  | 1039 | 1079 |
| Tbg972.3.5120 | <i>T. brucei</i> | 41  | 1039 | 1079 |
| Tbg972.3.5130 | <i>T. brucei</i> | 390 | 1842 | 2231 |
| Tbg972.3.5130 | <i>T. brucei</i> | 524 | 2240 | 2763 |
| Tbg972.3.5130 | <i>T. brucei</i> | 41  | 2805 | 2845 |
| Tbg972.3.5130 | <i>T. brucei</i> | 144 | 2937 | 3080 |
| Tbg972.3.5140 | <i>T. brucei</i> | 45  | 431  | 475  |
| Tbg972.3.5140 | <i>T. brucei</i> | 96  | 948  | 1043 |
| Tbg972.3.5140 | <i>T. brucei</i> | 96  | 948  | 1043 |
| Tbg972.3.5200 | <i>T. brucei</i> | 75  | 39   | 113  |
| Tbg972.3.5200 | <i>T. brucei</i> | 40  | 183  | 222  |
| Tbg972.3.5200 | <i>T. brucei</i> | 40  | 183  | 222  |
| Tbg972.3.5230 | <i>T. brucei</i> | 147 | 48   | 194  |
| Tbg972.3.5240 | <i>T. brucei</i> | 40  | 1    | 40   |
| Tbg972.3.5250 | <i>T. brucei</i> | 75  | 1    | 75   |
| Tbg972.3.5250 | <i>T. brucei</i> | 43  | 159  | 201  |
| Tbg972.3.5250 | <i>T. brucei</i> | 196 | 251  | 446  |
| Tbg972.3.5270 | <i>T. brucei</i> | 51  | 51   | 101  |
| Tbg972.3.5280 | <i>T. brucei</i> | 60  | 502  | 561  |
| Tbg972.3.5280 | <i>T. brucei</i> | 44  | 617  | 660  |
| Tbg972.3.5280 | <i>T. brucei</i> | 44  | 617  | 660  |
| Tbg972.3.5290 | <i>T. brucei</i> | 134 | 151  | 284  |
| Tbg972.3.530  | <i>T. brucei</i> | 52  | 46   | 97   |
| Tbg972.3.5320 | <i>T. brucei</i> | 59  | 502  | 560  |
| Tbg972.3.5330 | <i>T. brucei</i> | 134 | 151  | 284  |
| Tbg972.3.5360 | <i>T. brucei</i> | 172 | 1    | 172  |
| Tbg972.3.5360 | <i>T. brucei</i> | 49  | 571  | 619  |
| Tbg972.3.5360 | <i>T. brucei</i> | 49  | 571  | 619  |
| Tbg972.3.5370 | <i>T. brucei</i> | 59  | 1    | 59   |
| Tbg972.3.540  | <i>T. brucei</i> | 43  | 234  | 276  |
| Tbg972.3.5420 | <i>T. brucei</i> | 46  | 136  | 181  |
| Tbg972.3.5460 | <i>T. brucei</i> | 117 | 152  | 268  |
| Tbg972.3.5460 | <i>T. brucei</i> | 60  | 300  | 359  |
| Tbg972.3.5500 | <i>T. brucei</i> | 60  | 293  | 352  |
| Tbg972.3.5510 | <i>T. brucei</i> | 47  | 217  | 263  |
| Tbg972.3.5510 | <i>T. brucei</i> | 42  | 336  | 377  |
| Tbg972.3.5510 | <i>T. brucei</i> | 42  | 336  | 377  |
| Tbg972.3.5520 | <i>T. brucei</i> | 43  | 36   | 78   |
| Tbg972.3.5540 | <i>T. brucei</i> | 270 | 29   | 298  |
| Tbg972.3.5550 | <i>T. brucei</i> | 65  | 1    | 65   |
| Tbg972.3.5550 | <i>T. brucei</i> | 613 | 409  | 1021 |
| Tbg972.3.5550 | <i>T. brucei</i> | 79  | 1128 | 1206 |
| Tbg972.3.5550 | <i>T. brucei</i> | 69  | 1268 | 1336 |

|               |                  |     |      |      |
|---------------|------------------|-----|------|------|
| Tbg972.3.5550 | <i>T. brucei</i> | 150 | 1352 | 1501 |
| Tbg972.3.5570 | <i>T. brucei</i> | 48  | 83   | 130  |
| Tbg972.3.5570 | <i>T. brucei</i> | 365 | 177  | 541  |
| Tbg972.3.5570 | <i>T. brucei</i> | 65  | 558  | 622  |
| Tbg972.3.5570 | <i>T. brucei</i> | 118 | 656  | 773  |
| Tbg972.3.5570 | <i>T. brucei</i> | 145 | 841  | 985  |
| Tbg972.3.5580 | <i>T. brucei</i> | 62  | 232  | 293  |
| Tbg972.3.5580 | <i>T. brucei</i> | 181 | 339  | 519  |
| Tbg972.3.560  | <i>T. brucei</i> | 77  | 189  | 265  |
| Tbg972.3.560  | <i>T. brucei</i> | 117 | 521  | 637  |
| Tbg972.3.560  | <i>T. brucei</i> | 390 | 748  | 1137 |
| Tbg972.3.5600 | <i>T. brucei</i> | 78  | 15   | 92   |
| Tbg972.3.5600 | <i>T. brucei</i> | 56  | 263  | 318  |
| Tbg972.3.5600 | <i>T. brucei</i> | 56  | 263  | 318  |
| Tbg972.3.5610 | <i>T. brucei</i> | 153 | 1    | 153  |
| Tbg972.3.5620 | <i>T. brucei</i> | 58  | 210  | 267  |
| Tbg972.3.5620 | <i>T. brucei</i> | 69  | 269  | 337  |
| Tbg972.3.5620 | <i>T. brucei</i> | 65  | 706  | 770  |
| Tbg972.3.5620 | <i>T. brucei</i> | 42  | 812  | 853  |
| Tbg972.3.5620 | <i>T. brucei</i> | 275 | 960  | 1234 |
| Tbg972.3.5640 | <i>T. brucei</i> | 40  | 1    | 40   |
| Tbg972.3.5640 | <i>T. brucei</i> | 153 | 189  | 341  |
| Tbg972.3.5640 | <i>T. brucei</i> | 43  | 394  | 436  |
| Tbg972.3.5640 | <i>T. brucei</i> | 47  | 459  | 505  |
| Tbg972.3.5650 | <i>T. brucei</i> | 96  | 279  | 374  |
| Tbg972.3.5670 | <i>T. brucei</i> | 40  | 308  | 347  |
| Tbg972.3.5680 | <i>T. brucei</i> | 143 | 130  | 272  |
| Tbg972.3.5680 | <i>T. brucei</i> | 47  | 395  | 441  |
| Tbg972.3.5680 | <i>T. brucei</i> | 47  | 395  | 441  |
| Tbg972.3.570  | <i>T. brucei</i> | 73  | 43   | 115  |
| Tbg972.3.5700 | <i>T. brucei</i> | 51  | 47   | 97   |
| Tbg972.3.5700 | <i>T. brucei</i> | 59  | 118  | 176  |
| Tbg972.3.5700 | <i>T. brucei</i> | 151 | 198  | 348  |
| Tbg972.3.5730 | <i>T. brucei</i> | 42  | 1    | 42   |
| Tbg972.3.5740 | <i>T. brucei</i> | 142 | 90   | 231  |
| Tbg972.3.5740 | <i>T. brucei</i> | 53  | 274  | 326  |
| Tbg972.3.5740 | <i>T. brucei</i> | 53  | 274  | 326  |
| Tbg972.3.5750 | <i>T. brucei</i> | 298 | 1    | 298  |
| Tbg972.3.5750 | <i>T. brucei</i> | 60  | 341  | 400  |
| Tbg972.3.5750 | <i>T. brucei</i> | 45  | 441  | 485  |
| Tbg972.3.5770 | <i>T. brucei</i> | 54  | 74   | 127  |
| Tbg972.3.5790 | <i>T. brucei</i> | 40  | 44   | 83   |
| Tbg972.3.5790 | <i>T. brucei</i> | 179 | 97   | 275  |
| Tbg972.3.5790 | <i>T. brucei</i> | 189 | 318  | 506  |
| Tbg972.3.580  | <i>T. brucei</i> | 104 | 3138 | 3241 |
| Tbg972.3.580  | <i>T. brucei</i> | 67  | 3387 | 3453 |
| Tbg972.3.580  | <i>T. brucei</i> | 48  | 3681 | 3728 |

|               |                  |     |      |      |
|---------------|------------------|-----|------|------|
| Tbg972.3.580  | <i>T. brucei</i> | 50  | 4546 | 4595 |
| Tbg972.3.5810 | <i>T. brucei</i> | 60  | 1    | 60   |
| Tbg972.3.5820 | <i>T. brucei</i> | 134 | 1    | 134  |
| Tbg972.3.5820 | <i>T. brucei</i> | 99  | 197  | 295  |
| Tbg972.3.5820 | <i>T. brucei</i> | 78  | 301  | 378  |
| Tbg972.3.5820 | <i>T. brucei</i> | 58  | 428  | 485  |
| Tbg972.3.5820 | <i>T. brucei</i> | 195 | 495  | 689  |
| Tbg972.3.5820 | <i>T. brucei</i> | 212 | 693  | 904  |
| Tbg972.3.5820 | <i>T. brucei</i> | 68  | 1003 | 1070 |
| Tbg972.3.5850 | <i>T. brucei</i> | 48  | 1    | 48   |
| Tbg972.3.5860 | <i>T. brucei</i> | 51  | 1    | 51   |
| Tbg972.3.5860 | <i>T. brucei</i> | 60  | 66   | 125  |
| Tbg972.3.5860 | <i>T. brucei</i> | 60  | 66   | 125  |
| Tbg972.3.5870 | <i>T. brucei</i> | 43  | 276  | 318  |
| Tbg972.3.5880 | <i>T. brucei</i> | 216 | 82   | 297  |
| Tbg972.3.5880 | <i>T. brucei</i> | 56  | 306  | 361  |
| Tbg972.3.5880 | <i>T. brucei</i> | 152 | 438  | 589  |
| Tbg972.3.5900 | <i>T. brucei</i> | 73  | 57   | 129  |
| Tbg972.3.5910 | <i>T. brucei</i> | 43  | 539  | 581  |
| Tbg972.3.5920 | <i>T. brucei</i> | 239 | 93   | 331  |
| Tbg972.3.5920 | <i>T. brucei</i> | 174 | 353  | 526  |
| Tbg972.3.5940 | <i>T. brucei</i> | 42  | 1    | 42   |
| Tbg972.3.5950 | <i>T. brucei</i> | 46  | 1    | 46   |
| Tbg972.3.5960 | <i>T. brucei</i> | 255 | 1    | 255  |
| Tbg972.3.5960 | <i>T. brucei</i> | 150 | 320  | 469  |
| Tbg972.3.5980 | <i>T. brucei</i> | 63  | 196  | 258  |
| Tbg972.3.5990 | <i>T. brucei</i> | 87  | 49   | 135  |
| Tbg972.3.5990 | <i>T. brucei</i> | 312 | 170  | 481  |
| Tbg972.3.5990 | <i>T. brucei</i> | 64  | 539  | 602  |
| Tbg972.3.600  | <i>T. brucei</i> | 45  | 80   | 124  |
| Tbg972.3.6000 | <i>T. brucei</i> | 51  | 122  | 172  |
| Tbg972.3.6020 | <i>T. brucei</i> | 44  | 253  | 296  |
| Tbg972.3.6030 | <i>T. brucei</i> | 61  | 1    | 61   |
| Tbg972.3.6030 | <i>T. brucei</i> | 71  | 170  | 240  |
| Tbg972.3.6040 | <i>T. brucei</i> | 78  | 40   | 117  |
| Tbg972.3.6040 | <i>T. brucei</i> | 197 | 192  | 388  |
| Tbg972.3.6050 | <i>T. brucei</i> | 47  | 1    | 47   |
| Tbg972.3.6070 | <i>T. brucei</i> | 271 | 29   | 299  |
| Tbg972.3.6100 | <i>T. brucei</i> | 43  | 1    | 43   |
| Tbg972.3.6100 | <i>T. brucei</i> | 46  | 102  | 147  |
| Tbg972.3.6100 | <i>T. brucei</i> | 138 | 435  | 572  |
| Tbg972.3.6120 | <i>T. brucei</i> | 96  | 20   | 115  |
| Tbg972.3.6140 | <i>T. brucei</i> | 79  | 426  | 504  |
| Tbg972.3.6140 | <i>T. brucei</i> | 77  | 759  | 835  |
| Tbg972.3.6140 | <i>T. brucei</i> | 114 | 1302 | 1415 |
| Tbg972.3.6150 | <i>T. brucei</i> | 147 | 1    | 147  |
| Tbg972.3.6150 | <i>T. brucei</i> | 241 | 162  | 402  |

|               |                  |     |      |      |
|---------------|------------------|-----|------|------|
| Tbg972.3.6150 | <i>T. brucei</i> | 141 | 415  | 555  |
| Tbg972.3.6150 | <i>T. brucei</i> | 54  | 730  | 783  |
| Tbg972.3.6150 | <i>T. brucei</i> | 63  | 837  | 899  |
| Tbg972.3.6160 | <i>T. brucei</i> | 122 | 1    | 122  |
| Tbg972.3.6160 | <i>T. brucei</i> | 48  | 253  | 300  |
| Tbg972.3.6160 | <i>T. brucei</i> | 152 | 322  | 473  |
| Tbg972.3.6170 | <i>T. brucei</i> | 177 | 1    | 177  |
| Tbg972.3.620  | <i>T. brucei</i> | 42  | 263  | 304  |
| Tbg972.3.6220 | <i>T. brucei</i> | 48  | 1    | 48   |
| Tbg972.3.6230 | <i>T. brucei</i> | 352 | 1    | 352  |
| Tbg972.3.6230 | <i>T. brucei</i> | 50  | 384  | 433  |
| Tbg972.3.6230 | <i>T. brucei</i> | 61  | 516  | 576  |
| Tbg972.3.6230 | <i>T. brucei</i> | 102 | 1722 | 1823 |
| Tbg972.3.6270 | <i>T. brucei</i> | 68  | 114  | 181  |
| Tbg972.3.630  | <i>T. brucei</i> | 96  | 21   | 116  |
| Tbg972.3.6300 | <i>T. brucei</i> | 46  | 28   | 73   |
| Tbg972.3.6310 | <i>T. brucei</i> | 108 | 366  | 473  |
| Tbg972.3.6320 | <i>T. brucei</i> | 88  | 395  | 482  |
| Tbg972.3.6320 | <i>T. brucei</i> | 56  | 898  | 953  |
| Tbg972.3.6340 | <i>T. brucei</i> | 210 | 109  | 318  |
| Tbg972.3.6340 | <i>T. brucei</i> | 44  | 367  | 410  |
| Tbg972.3.6340 | <i>T. brucei</i> | 52  | 437  | 488  |
| Tbg972.3.6340 | <i>T. brucei</i> | 42  | 504  | 545  |
| Tbg972.3.6390 | <i>T. brucei</i> | 59  | 103  | 161  |
| Tbg972.3.6390 | <i>T. brucei</i> | 135 | 183  | 317  |
| Tbg972.3.650  | <i>T. brucei</i> | 43  | 244  | 286  |
| Tbg972.3.650  | <i>T. brucei</i> | 51  | 320  | 370  |
| Tbg972.3.650  | <i>T. brucei</i> | 51  | 320  | 370  |
| Tbg972.3.660  | <i>T. brucei</i> | 76  | 143  | 218  |
| Tbg972.3.660  | <i>T. brucei</i> | 54  | 286  | 339  |
| Tbg972.3.660  | <i>T. brucei</i> | 56  | 645  | 700  |
| Tbg972.3.670  | <i>T. brucei</i> | 132 | 1    | 132  |
| Tbg972.3.670  | <i>T. brucei</i> | 297 | 195  | 491  |
| Tbg972.3.690  | <i>T. brucei</i> | 50  | 1    | 50   |
| Tbg972.3.690  | <i>T. brucei</i> | 54  | 127  | 180  |
| Tbg972.3.690  | <i>T. brucei</i> | 54  | 127  | 180  |
| Tbg972.3.70   | <i>T. brucei</i> | 61  | 135  | 195  |
| Tbg972.3.70   | <i>T. brucei</i> | 62  | 406  | 467  |
| Tbg972.3.700  | <i>T. brucei</i> | 89  | 1    | 89   |
| Tbg972.3.700  | <i>T. brucei</i> | 449 | 152  | 600  |
| Tbg972.3.710  | <i>T. brucei</i> | 86  | 29   | 114  |
| Tbg972.3.720  | <i>T. brucei</i> | 132 | 1    | 132  |
| Tbg972.3.720  | <i>T. brucei</i> | 52  | 148  | 199  |
| Tbg972.3.720  | <i>T. brucei</i> | 107 | 279  | 385  |
| Tbg972.3.730  | <i>T. brucei</i> | 47  | 38   | 84   |
| Tbg972.3.730  | <i>T. brucei</i> | 196 | 162  | 357  |
| Tbg972.3.770  | <i>T. brucei</i> | 50  | 445  | 494  |



|               |                  |     |      |      |
|---------------|------------------|-----|------|------|
| Tbg972.3.770  | <i>T. brucei</i> | 57  | 681  | 737  |
| Tbg972.3.770  | <i>T. brucei</i> | 57  | 681  | 737  |
| Tbg972.3.780  | <i>T. brucei</i> | 45  | 130  | 174  |
| Tbg972.3.780  | <i>T. brucei</i> | 40  | 318  | 357  |
| Tbg972.3.780  | <i>T. brucei</i> | 40  | 318  | 357  |
| Tbg972.3.810  | <i>T. brucei</i> | 94  | 304  | 397  |
| Tbg972.3.820  | <i>T. brucei</i> | 83  | 149  | 231  |
| Tbg972.3.820  | <i>T. brucei</i> | 205 | 273  | 477  |
| Tbg972.3.860  | <i>T. brucei</i> | 41  | 116  | 156  |
| Tbg972.3.870  | <i>T. brucei</i> | 44  | 1    | 44   |
| Tbg972.3.870  | <i>T. brucei</i> | 48  | 81   | 128  |
| Tbg972.3.870  | <i>T. brucei</i> | 102 | 289  | 390  |
| Tbg972.3.890  | <i>T. brucei</i> | 80  | 43   | 122  |
| Tbg972.3.890  | <i>T. brucei</i> | 87  | 161  | 247  |
| Tbg972.3.900  | <i>T. brucei</i> | 68  | 157  | 224  |
| Tbg972.3.900  | <i>T. brucei</i> | 81  | 317  | 397  |
| Tbg972.3.910  | <i>T. brucei</i> | 94  | 1    | 94   |
| Tbg972.3.920  | <i>T. brucei</i> | 104 | 24   | 127  |
| Tbg972.3.920  | <i>T. brucei</i> | 41  | 275  | 315  |
| Tbg972.3.920  | <i>T. brucei</i> | 112 | 325  | 436  |
| Tbg972.3.920  | <i>T. brucei</i> | 64  | 813  | 876  |
| Tbg972.3.920  | <i>T. brucei</i> | 74  | 1394 | 1467 |
| Tbg972.3.920  | <i>T. brucei</i> | 90  | 1779 | 1868 |
| Tbg972.3.920  | <i>T. brucei</i> | 45  | 2078 | 2122 |
| Tbg972.3.930  | <i>T. brucei</i> | 62  | 181  | 242  |
| Tbg972.3.930  | <i>T. brucei</i> | 142 | 331  | 472  |
| Tbg972.3.930  | <i>T. brucei</i> | 107 | 662  | 768  |
| Tbg972.3.930  | <i>T. brucei</i> | 60  | 840  | 899  |
| Tbg972.3.940  | <i>T. brucei</i> | 106 | 1    | 106  |
| Tbg972.3.950  | <i>T. brucei</i> | 244 | 1    | 244  |
| Tbg972.3.970  | <i>T. brucei</i> | 181 | 319  | 499  |
| Tbg972.3.980  | <i>T. brucei</i> | 43  | 131  | 173  |
| Tbg972.3.980  | <i>T. brucei</i> | 45  | 258  | 302  |
| Tbg972.3.980  | <i>T. brucei</i> | 69  | 461  | 529  |
| Tbg972.3.980  | <i>T. brucei</i> | 59  | 678  | 736  |
| Tbg972.4.10   | <i>T. brucei</i> | 70  | 33   | 102  |
| Tbg972.4.10   | <i>T. brucei</i> | 44  | 244  | 287  |
| Tbg972.4.10   | <i>T. brucei</i> | 89  | 1459 | 1547 |
| Tbg972.4.10   | <i>T. brucei</i> | 59  | 2549 | 2607 |
| Tbg972.4.10   | <i>T. brucei</i> | 56  | 6385 | 6440 |
| Tbg972.4.1000 | <i>T. brucei</i> | 80  | 260  | 339  |
| Tbg972.4.1060 | <i>T. brucei</i> | 107 | 66   | 172  |
| Tbg972.4.1060 | <i>T. brucei</i> | 45  | 267  | 311  |
| Tbg972.4.1060 | <i>T. brucei</i> | 45  | 267  | 311  |
| Tbg972.4.1140 | <i>T. brucei</i> | 41  | 156  | 196  |
| Tbg972.4.1140 | <i>T. brucei</i> | 42  | 229  | 270  |
| Tbg972.4.1140 | <i>T. brucei</i> | 44  | 319  | 362  |

|               |                  |     |      |      |
|---------------|------------------|-----|------|------|
| Tbg972.4.1150 | <i>T. brucei</i> | 48  | 385  | 432  |
| Tbg972.4.1150 | <i>T. brucei</i> | 85  | 464  | 548  |
| Tbg972.4.1150 | <i>T. brucei</i> | 133 | 685  | 817  |
| Tbg972.4.1160 | <i>T. brucei</i> | 100 | 1    | 100  |
| Tbg972.4.1160 | <i>T. brucei</i> | 104 | 593  | 696  |
| Tbg972.4.1170 | <i>T. brucei</i> | 48  | 1    | 48   |
| Tbg972.4.1220 | <i>T. brucei</i> | 42  | 843  | 884  |
| Tbg972.4.1230 | <i>T. brucei</i> | 56  | 367  | 422  |
| Tbg972.4.1240 | <i>T. brucei</i> | 86  | 1    | 86   |
| Tbg972.4.1240 | <i>T. brucei</i> | 45  | 333  | 377  |
| Tbg972.4.1240 | <i>T. brucei</i> | 54  | 561  | 614  |
| Tbg972.4.1260 | <i>T. brucei</i> | 81  | 387  | 467  |
| Tbg972.4.1290 | <i>T. brucei</i> | 50  | 168  | 217  |
| Tbg972.4.130  | <i>T. brucei</i> | 45  | 1    | 45   |
| Tbg972.4.130  | <i>T. brucei</i> | 131 | 198  | 328  |
| Tbg972.4.130  | <i>T. brucei</i> | 131 | 198  | 328  |
| Tbg972.4.1320 | <i>T. brucei</i> | 47  | 351  | 397  |
| Tbg972.4.1320 | <i>T. brucei</i> | 181 | 540  | 720  |
| Tbg972.4.1350 | <i>T. brucei</i> | 51  | 45   | 95   |
| Tbg972.4.1350 | <i>T. brucei</i> | 131 | 508  | 638  |
| Tbg972.4.1350 | <i>T. brucei</i> | 72  | 756  | 827  |
| Tbg972.4.1350 | <i>T. brucei</i> | 41  | 941  | 981  |
| Tbg972.4.1350 | <i>T. brucei</i> | 42  | 1305 | 1346 |
| Tbg972.4.1350 | <i>T. brucei</i> | 58  | 2116 | 2173 |
| Tbg972.4.1380 | <i>T. brucei</i> | 49  | 788  | 836  |
| Tbg972.4.1380 | <i>T. brucei</i> | 44  | 861  | 904  |
| Tbg972.4.1390 | <i>T. brucei</i> | 55  | 73   | 127  |
| Tbg972.4.1400 | <i>T. brucei</i> | 192 | 239  | 430  |
| Tbg972.4.1420 | <i>T. brucei</i> | 44  | 77   | 120  |
| Tbg972.4.1420 | <i>T. brucei</i> | 57  | 386  | 442  |
| Tbg972.4.1440 | <i>T. brucei</i> | 47  | 72   | 118  |
| Tbg972.4.1440 | <i>T. brucei</i> | 46  | 164  | 209  |
| Tbg972.4.1440 | <i>T. brucei</i> | 46  | 164  | 209  |
| Tbg972.4.1450 | <i>T. brucei</i> | 89  | 1    | 89   |
| Tbg972.4.1460 | <i>T. brucei</i> | 59  | 45   | 103  |
| Tbg972.4.1460 | <i>T. brucei</i> | 41  | 196  | 236  |
| Tbg972.4.1460 | <i>T. brucei</i> | 41  | 196  | 236  |
| Tbg972.4.1480 | <i>T. brucei</i> | 40  | 33   | 72   |
| Tbg972.4.150  | <i>T. brucei</i> | 57  | 1347 | 1403 |
| Tbg972.4.1500 | <i>T. brucei</i> | 58  | 1    | 58   |
| Tbg972.4.1500 | <i>T. brucei</i> | 55  | 369  | 423  |
| Tbg972.4.1500 | <i>T. brucei</i> | 55  | 369  | 423  |
| Tbg972.4.1510 | <i>T. brucei</i> | 60  | 106  | 165  |
| Tbg972.4.1510 | <i>T. brucei</i> | 106 | 633  | 738  |
| Tbg972.4.1540 | <i>T. brucei</i> | 49  | 1    | 49   |
| Tbg972.4.1540 | <i>T. brucei</i> | 72  | 111  | 182  |
| Tbg972.4.1570 | <i>T. brucei</i> | 40  | 1    | 40   |

|               |                  |     |     |     |
|---------------|------------------|-----|-----|-----|
| Tbg972.4.1590 | <i>T. brucei</i> | 58  | 94  | 151 |
| Tbg972.4.1590 | <i>T. brucei</i> | 63  | 170 | 232 |
| Tbg972.4.160  | <i>T. brucei</i> | 101 | 1   | 101 |
| Tbg972.4.1600 | <i>T. brucei</i> | 111 | 1   | 111 |
| Tbg972.4.1610 | <i>T. brucei</i> | 76  | 18  | 93  |
| Tbg972.4.1610 | <i>T. brucei</i> | 325 | 368 | 692 |
| Tbg972.4.1640 | <i>T. brucei</i> | 108 | 52  | 159 |
| Tbg972.4.1660 | <i>T. brucei</i> | 48  | 22  | 69  |
| Tbg972.4.1700 | <i>T. brucei</i> | 51  | 49  | 99  |
| Tbg972.4.1700 | <i>T. brucei</i> | 81  | 400 | 480 |
| Tbg972.4.1710 | <i>T. brucei</i> | 48  | 1   | 48  |
| Tbg972.4.1710 | <i>T. brucei</i> | 81  | 349 | 429 |
| Tbg972.4.1730 | <i>T. brucei</i> | 50  | 146 | 195 |
| Tbg972.4.1730 | <i>T. brucei</i> | 46  | 290 | 335 |
| Tbg972.4.1730 | <i>T. brucei</i> | 46  | 290 | 335 |
| Tbg972.4.1750 | <i>T. brucei</i> | 66  | 1   | 66  |
| Tbg972.4.1750 | <i>T. brucei</i> | 63  | 158 | 220 |
| Tbg972.4.1750 | <i>T. brucei</i> | 49  | 725 | 773 |
| Tbg972.4.1790 | <i>T. brucei</i> | 275 | 32  | 306 |
| Tbg972.4.1800 | <i>T. brucei</i> | 48  | 177 | 224 |
| Tbg972.4.1810 | <i>T. brucei</i> | 79  | 86  | 164 |
| Tbg972.4.1810 | <i>T. brucei</i> | 113 | 264 | 376 |
| Tbg972.4.1830 | <i>T. brucei</i> | 203 | 14  | 216 |
| Tbg972.4.1840 | <i>T. brucei</i> | 54  | 124 | 177 |
| Tbg972.4.1840 | <i>T. brucei</i> | 56  | 540 | 595 |
| Tbg972.4.1840 | <i>T. brucei</i> | 56  | 540 | 595 |
| Tbg972.4.1850 | <i>T. brucei</i> | 87  | 110 | 196 |
| Tbg972.4.1860 | <i>T. brucei</i> | 42  | 282 | 323 |
| Tbg972.4.1880 | <i>T. brucei</i> | 41  | 16  | 56  |
| Tbg972.4.1880 | <i>T. brucei</i> | 226 | 125 | 350 |
| Tbg972.4.190  | <i>T. brucei</i> | 63  | 816 | 878 |
| Tbg972.4.1900 | <i>T. brucei</i> | 238 | 643 | 880 |
| Tbg972.4.1920 | <i>T. brucei</i> | 47  | 124 | 170 |
| Tbg972.4.1950 | <i>T. brucei</i> | 86  | 132 | 217 |
| Tbg972.4.1960 | <i>T. brucei</i> | 57  | 134 | 190 |
| Tbg972.4.1970 | <i>T. brucei</i> | 64  | 71  | 134 |
| Tbg972.4.1980 | <i>T. brucei</i> | 275 | 154 | 428 |
| Tbg972.4.1980 | <i>T. brucei</i> | 52  | 535 | 586 |
| Tbg972.4.1980 | <i>T. brucei</i> | 52  | 535 | 586 |
| Tbg972.4.1990 | <i>T. brucei</i> | 141 | 1   | 141 |
| Tbg972.4.20   | <i>T. brucei</i> | 54  | 199 | 252 |
| Tbg972.4.2020 | <i>T. brucei</i> | 113 | 305 | 417 |
| Tbg972.4.2020 | <i>T. brucei</i> | 450 | 439 | 888 |
| Tbg972.4.2030 | <i>T. brucei</i> | 190 | 1   | 190 |
| Tbg972.4.2030 | <i>T. brucei</i> | 52  | 202 | 253 |
| Tbg972.4.2030 | <i>T. brucei</i> | 94  | 293 | 386 |
| Tbg972.4.2030 | <i>T. brucei</i> | 308 | 421 | 728 |

|               |                  |     |      |      |
|---------------|------------------|-----|------|------|
| Tbg972.4.2060 | <i>T. brucei</i> | 77  | 1    | 77   |
| Tbg972.4.2070 | <i>T. brucei</i> | 154 | 64   | 217  |
| Tbg972.4.2070 | <i>T. brucei</i> | 48  | 233  | 280  |
| Tbg972.4.2070 | <i>T. brucei</i> | 104 | 303  | 406  |
| Tbg972.4.2070 | <i>T. brucei</i> | 59  | 425  | 483  |
| Tbg972.4.2070 | <i>T. brucei</i> | 115 | 490  | 604  |
| Tbg972.4.2070 | <i>T. brucei</i> | 94  | 721  | 814  |
| Tbg972.4.2070 | <i>T. brucei</i> | 151 | 850  | 1000 |
| Tbg972.4.2086 | <i>T. brucei</i> | 45  | 62   | 106  |
| Tbg972.4.2090 | <i>T. brucei</i> | 41  | 1    | 41   |
| Tbg972.4.2110 | <i>T. brucei</i> | 58  | 1    | 58   |
| Tbg972.4.2130 | <i>T. brucei</i> | 77  | 1449 | 1525 |
| Tbg972.4.2150 | <i>T. brucei</i> | 44  | 150  | 193  |
| Tbg972.4.2160 | <i>T. brucei</i> | 53  | 1    | 53   |
| Tbg972.4.2160 | <i>T. brucei</i> | 59  | 115  | 173  |
| Tbg972.4.2160 | <i>T. brucei</i> | 51  | 208  | 258  |
| Tbg972.4.2160 | <i>T. brucei</i> | 42  | 558  | 599  |
| Tbg972.4.2160 | <i>T. brucei</i> | 41  | 665  | 705  |
| Tbg972.4.2170 | <i>T. brucei</i> | 145 | 1    | 145  |
| Tbg972.4.220  | <i>T. brucei</i> | 64  | 1    | 64   |
| Tbg972.4.220  | <i>T. brucei</i> | 98  | 133  | 230  |
| Tbg972.4.2220 | <i>T. brucei</i> | 77  | 1    | 77   |
| Tbg972.4.2220 | <i>T. brucei</i> | 46  | 123  | 168  |
| Tbg972.4.2220 | <i>T. brucei</i> | 46  | 123  | 168  |
| Tbg972.4.2230 | <i>T. brucei</i> | 190 | 1    | 190  |
| Tbg972.4.2240 | <i>T. brucei</i> | 142 | 27   | 168  |
| Tbg972.4.2240 | <i>T. brucei</i> | 62  | 249  | 310  |
| Tbg972.4.2250 | <i>T. brucei</i> | 380 | 1    | 380  |
| Tbg972.4.2270 | <i>T. brucei</i> | 46  | 1    | 46   |
| Tbg972.4.2270 | <i>T. brucei</i> | 58  | 233  | 290  |
| Tbg972.4.2270 | <i>T. brucei</i> | 82  | 371  | 452  |
| Tbg972.4.2270 | <i>T. brucei</i> | 56  | 500  | 555  |
| Tbg972.4.2280 | <i>T. brucei</i> | 44  | 44   | 87   |
| Tbg972.4.2280 | <i>T. brucei</i> | 51  | 248  | 298  |
| Tbg972.4.2280 | <i>T. brucei</i> | 51  | 248  | 298  |
| Tbg972.4.230  | <i>T. brucei</i> | 61  | 1    | 61   |
| Tbg972.4.2300 | <i>T. brucei</i> | 83  | 18   | 100  |
| Tbg972.4.2310 | <i>T. brucei</i> | 75  | 95   | 169  |
| Tbg972.4.2310 | <i>T. brucei</i> | 57  | 264  | 320  |
| Tbg972.4.2310 | <i>T. brucei</i> | 57  | 264  | 320  |
| Tbg972.4.2330 | <i>T. brucei</i> | 48  | 107  | 154  |
| Tbg972.4.2330 | <i>T. brucei</i> | 41  | 426  | 466  |
| Tbg972.4.2330 | <i>T. brucei</i> | 103 | 470  | 572  |
| Tbg972.4.2340 | <i>T. brucei</i> | 157 | 468  | 624  |
| Tbg972.4.2350 | <i>T. brucei</i> | 70  | 1    | 70   |
| Tbg972.4.2360 | <i>T. brucei</i> | 106 | 39   | 144  |
| Tbg972.4.2360 | <i>T. brucei</i> | 40  | 532  | 571  |

|               |                  |     |      |      |
|---------------|------------------|-----|------|------|
| Tbg972.4.2360 | <i>T. brucei</i> | 65  | 651  | 715  |
| Tbg972.4.2360 | <i>T. brucei</i> | 41  | 717  | 757  |
| Tbg972.4.2360 | <i>T. brucei</i> | 75  | 834  | 908  |
| Tbg972.4.2360 | <i>T. brucei</i> | 176 | 1023 | 1198 |
| Tbg972.4.2360 | <i>T. brucei</i> | 127 | 1341 | 1467 |
| Tbg972.4.2370 | <i>T. brucei</i> | 43  | 274  | 316  |
| Tbg972.4.2390 | <i>T. brucei</i> | 65  | 41   | 105  |
| Tbg972.4.2390 | <i>T. brucei</i> | 55  | 195  | 249  |
| Tbg972.4.2390 | <i>T. brucei</i> | 75  | 499  | 573  |
| Tbg972.4.240  | <i>T. brucei</i> | 90  | 1    | 90   |
| Tbg972.4.240  | <i>T. brucei</i> | 52  | 203  | 254  |
| Tbg972.4.2410 | <i>T. brucei</i> | 47  | 259  | 305  |
| Tbg972.4.2420 | <i>T. brucei</i> | 62  | 11   | 72   |
| Tbg972.4.2430 | <i>T. brucei</i> | 44  | 702  | 745  |
| Tbg972.4.2440 | <i>T. brucei</i> | 40  | 72   | 111  |
| Tbg972.4.2450 | <i>T. brucei</i> | 78  | 33   | 110  |
| Tbg972.4.2450 | <i>T. brucei</i> | 89  | 121  | 209  |
| Tbg972.4.2460 | <i>T. brucei</i> | 50  | 503  | 552  |
| Tbg972.4.2460 | <i>T. brucei</i> | 45  | 887  | 931  |
| Tbg972.4.2460 | <i>T. brucei</i> | 67  | 942  | 1008 |
| Tbg972.4.2470 | <i>T. brucei</i> | 44  | 181  | 224  |
| Tbg972.4.2470 | <i>T. brucei</i> | 69  | 862  | 930  |
| Tbg972.4.2470 | <i>T. brucei</i> | 69  | 862  | 930  |
| Tbg972.4.250  | <i>T. brucei</i> | 57  | 126  | 182  |
| Tbg972.4.250  | <i>T. brucei</i> | 58  | 210  | 267  |
| Tbg972.4.2510 | <i>T. brucei</i> | 45  | 258  | 302  |
| Tbg972.4.2520 | <i>T. brucei</i> | 76  | 308  | 383  |
| Tbg972.4.2540 | <i>T. brucei</i> | 170 | 495  | 664  |
| Tbg972.4.2550 | <i>T. brucei</i> | 47  | 153  | 199  |
| Tbg972.4.2550 | <i>T. brucei</i> | 57  | 451  | 507  |
| Tbg972.4.2560 | <i>T. brucei</i> | 77  | 24   | 100  |
| Tbg972.4.2560 | <i>T. brucei</i> | 65  | 255  | 319  |
| Tbg972.4.2560 | <i>T. brucei</i> | 148 | 358  | 505  |
| Tbg972.4.2560 | <i>T. brucei</i> | 157 | 883  | 1039 |
| Tbg972.4.2560 | <i>T. brucei</i> | 70  | 1355 | 1424 |
| Tbg972.4.2560 | <i>T. brucei</i> | 73  | 1461 | 1533 |
| Tbg972.4.2560 | <i>T. brucei</i> | 97  | 1575 | 1671 |
| Tbg972.4.2570 | <i>T. brucei</i> | 53  | 156  | 208  |
| Tbg972.4.2580 | <i>T. brucei</i> | 111 | 510  | 620  |
| Tbg972.4.2580 | <i>T. brucei</i> | 109 | 735  | 843  |
| Tbg972.4.2590 | <i>T. brucei</i> | 40  | 1    | 40   |
| Tbg972.4.2590 | <i>T. brucei</i> | 40  | 63   | 102  |
| Tbg972.4.2590 | <i>T. brucei</i> | 189 | 254  | 442  |
| Tbg972.4.2590 | <i>T. brucei</i> | 282 | 477  | 758  |
| Tbg972.4.2590 | <i>T. brucei</i> | 106 | 1170 | 1275 |
| Tbg972.4.2610 | <i>T. brucei</i> | 40  | 51   | 90   |
| Tbg972.4.2610 | <i>T. brucei</i> | 85  | 458  | 542  |

|               |                  |     |      |      |
|---------------|------------------|-----|------|------|
| Tbg972.4.2650 | <i>T. brucei</i> | 59  | 187  | 245  |
| Tbg972.4.2650 | <i>T. brucei</i> | 108 | 333  | 440  |
| Tbg972.4.2650 | <i>T. brucei</i> | 55  | 444  | 498  |
| Tbg972.4.2700 | <i>T. brucei</i> | 78  | 79   | 156  |
| Tbg972.4.2700 | <i>T. brucei</i> | 56  | 714  | 769  |
| Tbg972.4.2700 | <i>T. brucei</i> | 56  | 714  | 769  |
| Tbg972.4.2710 | <i>T. brucei</i> | 104 | 526  | 629  |
| Tbg972.4.2710 | <i>T. brucei</i> | 144 | 660  | 803  |
| Tbg972.4.2730 | <i>T. brucei</i> | 161 | 1    | 161  |
| Tbg972.4.2730 | <i>T. brucei</i> | 114 | 186  | 299  |
| Tbg972.4.2740 | <i>T. brucei</i> | 57  | 1    | 57   |
| Tbg972.4.2750 | <i>T. brucei</i> | 45  | 1    | 45   |
| Tbg972.4.2750 | <i>T. brucei</i> | 75  | 139  | 213  |
| Tbg972.4.2750 | <i>T. brucei</i> | 75  | 139  | 213  |
| Tbg972.4.2760 | <i>T. brucei</i> | 57  | 1    | 57   |
| Tbg972.4.2760 | <i>T. brucei</i> | 52  | 69   | 120  |
| Tbg972.4.2760 | <i>T. brucei</i> | 65  | 166  | 230  |
| Tbg972.4.2760 | <i>T. brucei</i> | 396 | 308  | 703  |
| Tbg972.4.2760 | <i>T. brucei</i> | 85  | 707  | 791  |
| Tbg972.4.2770 | <i>T. brucei</i> | 51  | 519  | 569  |
| Tbg972.4.2780 | <i>T. brucei</i> | 69  | 1    | 69   |
| Tbg972.4.2780 | <i>T. brucei</i> | 51  | 155  | 205  |
| Tbg972.4.2780 | <i>T. brucei</i> | 96  | 358  | 453  |
| Tbg972.4.280  | <i>T. brucei</i> | 286 | 90   | 375  |
| Tbg972.4.280  | <i>T. brucei</i> | 73  | 438  | 510  |
| Tbg972.4.2800 | <i>T. brucei</i> | 161 | 183  | 343  |
| Tbg972.4.2800 | <i>T. brucei</i> | 79  | 364  | 442  |
| Tbg972.4.2800 | <i>T. brucei</i> | 163 | 587  | 749  |
| Tbg972.4.2830 | <i>T. brucei</i> | 42  | 1    | 42   |
| Tbg972.4.2830 | <i>T. brucei</i> | 104 | 201  | 304  |
| Tbg972.4.2830 | <i>T. brucei</i> | 70  | 325  | 394  |
| Tbg972.4.2830 | <i>T. brucei</i> | 75  | 424  | 498  |
| Tbg972.4.2830 | <i>T. brucei</i> | 125 | 516  | 640  |
| Tbg972.4.2840 | <i>T. brucei</i> | 61  | 1    | 61   |
| Tbg972.4.2850 | <i>T. brucei</i> | 73  | 1    | 73   |
| Tbg972.4.2850 | <i>T. brucei</i> | 174 | 110  | 283  |
| Tbg972.4.2860 | <i>T. brucei</i> | 45  | 36   | 80   |
| Tbg972.4.2860 | <i>T. brucei</i> | 49  | 1351 | 1399 |
| Tbg972.4.2860 | <i>T. brucei</i> | 57  | 1953 | 2009 |
| Tbg972.4.2870 | <i>T. brucei</i> | 62  | 1    | 62   |
| Tbg972.4.2870 | <i>T. brucei</i> | 55  | 178  | 232  |
| Tbg972.4.2870 | <i>T. brucei</i> | 55  | 178  | 232  |
| Tbg972.4.2890 | <i>T. brucei</i> | 81  | 335  | 415  |
| Tbg972.4.2890 | <i>T. brucei</i> | 48  | 793  | 840  |
| Tbg972.4.2890 | <i>T. brucei</i> | 48  | 793  | 840  |
| Tbg972.4.2900 | <i>T. brucei</i> | 160 | 1    | 160  |
| Tbg972.4.2900 | <i>T. brucei</i> | 68  | 204  | 271  |

|               |                  |     |      |      |
|---------------|------------------|-----|------|------|
| Tbg972.4.2900 | <i>T. brucei</i> | 67  | 280  | 346  |
| Tbg972.4.2900 | <i>T. brucei</i> | 110 | 475  | 584  |
| Tbg972.4.2910 | <i>T. brucei</i> | 303 | 1    | 303  |
| Tbg972.4.2910 | <i>T. brucei</i> | 40  | 317  | 356  |
| Tbg972.4.2910 | <i>T. brucei</i> | 63  | 389  | 451  |
| Tbg972.4.2910 | <i>T. brucei</i> | 185 | 757  | 941  |
| Tbg972.4.2920 | <i>T. brucei</i> | 67  | 43   | 109  |
| Tbg972.4.2920 | <i>T. brucei</i> | 87  | 185  | 271  |
| Tbg972.4.2940 | <i>T. brucei</i> | 76  | 57   | 132  |
| Tbg972.4.2940 | <i>T. brucei</i> | 77  | 201  | 277  |
| Tbg972.4.2940 | <i>T. brucei</i> | 77  | 201  | 277  |
| Tbg972.4.2950 | <i>T. brucei</i> | 228 | 20   | 247  |
| Tbg972.4.2950 | <i>T. brucei</i> | 70  | 632  | 701  |
| Tbg972.4.2970 | <i>T. brucei</i> | 161 | 95   | 255  |
| Tbg972.4.2980 | <i>T. brucei</i> | 49  | 155  | 203  |
| Tbg972.4.2990 | <i>T. brucei</i> | 62  | 110  | 171  |
| Tbg972.4.2990 | <i>T. brucei</i> | 52  | 1026 | 1077 |
| Tbg972.4.2990 | <i>T. brucei</i> | 69  | 1165 | 1233 |
| Tbg972.4.300  | <i>T. brucei</i> | 144 | 1    | 144  |
| Tbg972.4.3000 | <i>T. brucei</i> | 56  | 178  | 233  |
| Tbg972.4.3000 | <i>T. brucei</i> | 44  | 391  | 434  |
| Tbg972.4.3000 | <i>T. brucei</i> | 44  | 391  | 434  |
| Tbg972.4.3010 | <i>T. brucei</i> | 81  | 19   | 99   |
| Tbg972.4.3020 | <i>T. brucei</i> | 52  | 18   | 69   |
| Tbg972.4.3020 | <i>T. brucei</i> | 42  | 73   | 114  |
| Tbg972.4.3020 | <i>T. brucei</i> | 61  | 468  | 528  |
| Tbg972.4.3020 | <i>T. brucei</i> | 57  | 1219 | 1275 |
| Tbg972.4.3030 | <i>T. brucei</i> | 92  | 80   | 171  |
| Tbg972.4.3040 | <i>T. brucei</i> | 43  | 163  | 205  |
| Tbg972.4.3060 | <i>T. brucei</i> | 148 | 1    | 148  |
| Tbg972.4.3080 | <i>T. brucei</i> | 50  | 359  | 408  |
| Tbg972.4.3090 | <i>T. brucei</i> | 68  | 74   | 141  |
| Tbg972.4.310  | <i>T. brucei</i> | 47  | 420  | 466  |
| Tbg972.4.310  | <i>T. brucei</i> | 110 | 2837 | 2946 |
| Tbg972.4.310  | <i>T. brucei</i> | 62  | 3042 | 3103 |
| Tbg972.4.310  | <i>T. brucei</i> | 78  | 3350 | 3427 |
| Tbg972.4.3130 | <i>T. brucei</i> | 381 | 1    | 381  |
| Tbg972.4.3130 | <i>T. brucei</i> | 353 | 580  | 932  |
| Tbg972.4.3140 | <i>T. brucei</i> | 131 | 111  | 241  |
| Tbg972.4.3150 | <i>T. brucei</i> | 197 | 271  | 467  |
| Tbg972.4.3160 | <i>T. brucei</i> | 80  | 1    | 80   |
| Tbg972.4.3170 | <i>T. brucei</i> | 46  | 802  | 847  |
| Tbg972.4.3170 | <i>T. brucei</i> | 52  | 1191 | 1242 |
| Tbg972.4.3170 | <i>T. brucei</i> | 52  | 1191 | 1242 |
| Tbg972.4.3200 | <i>T. brucei</i> | 119 | 16   | 134  |
| Tbg972.4.3210 | <i>T. brucei</i> | 62  | 50   | 111  |
| Tbg972.4.3210 | <i>T. brucei</i> | 66  | 149  | 214  |

|               |                  |      |      |      |
|---------------|------------------|------|------|------|
| Tbg972.4.330  | <i>T. brucei</i> | 118  | 1    | 118  |
| Tbg972.4.330  | <i>T. brucei</i> | 54   | 125  | 178  |
| Tbg972.4.330  | <i>T. brucei</i> | 247  | 180  | 426  |
| Tbg972.4.3310 | <i>T. brucei</i> | 99   | 20   | 118  |
| Tbg972.4.3320 | <i>T. brucei</i> | 41   | 174  | 214  |
| Tbg972.4.3320 | <i>T. brucei</i> | 47   | 627  | 673  |
| Tbg972.4.3320 | <i>T. brucei</i> | 47   | 627  | 673  |
| Tbg972.4.3360 | <i>T. brucei</i> | 53   | 1    | 53   |
| Tbg972.4.3370 | <i>T. brucei</i> | 56   | 231  | 286  |
| Tbg972.4.3370 | <i>T. brucei</i> | 94   | 307  | 400  |
| Tbg972.4.3380 | <i>T. brucei</i> | 58   | 1    | 58   |
| Tbg972.4.3390 | <i>T. brucei</i> | 119  | 1049 | 1167 |
| Tbg972.4.3400 | <i>T. brucei</i> | 50   | 1    | 50   |
| Tbg972.4.3400 | <i>T. brucei</i> | 82   | 108  | 189  |
| Tbg972.4.3410 | <i>T. brucei</i> | 49   | 402  | 450  |
| Tbg972.4.3410 | <i>T. brucei</i> | 143  | 463  | 605  |
| Tbg972.4.3420 | <i>T. brucei</i> | 42   | 77   | 118  |
| Tbg972.4.3430 | <i>T. brucei</i> | 188  | 1    | 188  |
| Tbg972.4.3430 | <i>T. brucei</i> | 47   | 557  | 603  |
| Tbg972.4.3450 | <i>T. brucei</i> | 90   | 165  | 254  |
| Tbg972.4.3480 | <i>T. brucei</i> | 183  | 1    | 183  |
| Tbg972.4.3480 | <i>T. brucei</i> | 75   | 255  | 329  |
| Tbg972.4.3480 | <i>T. brucei</i> | 207  | 349  | 555  |
| Tbg972.4.3500 | <i>T. brucei</i> | 60   | 1    | 60   |
| Tbg972.4.3515 | <i>T. brucei</i> | 60   | 1    | 60   |
| Tbg972.4.3530 | <i>T. brucei</i> | 49   | 685  | 733  |
| Tbg972.4.3540 | <i>T. brucei</i> | 87   | 1    | 87   |
| Tbg972.4.3540 | <i>T. brucei</i> | 83   | 156  | 238  |
| Tbg972.4.3540 | <i>T. brucei</i> | 83   | 156  | 238  |
| Tbg972.4.3550 | <i>T. brucei</i> | 45   | 298  | 342  |
| Tbg972.4.3560 | <i>T. brucei</i> | 40   | 1    | 40   |
| Tbg972.4.3570 | <i>T. brucei</i> | 70   | 178  | 247  |
| Tbg972.4.3610 | <i>T. brucei</i> | 58   | 45   | 102  |
| Tbg972.4.3650 | <i>T. brucei</i> | 52   | 197  | 248  |
| Tbg972.4.3650 | <i>T. brucei</i> | 82   | 291  | 372  |
| Tbg972.4.3670 | <i>T. brucei</i> | 139  | 149  | 287  |
| Tbg972.4.3690 | <i>T. brucei</i> | 69   | 61   | 129  |
| Tbg972.4.3690 | <i>T. brucei</i> | 85   | 376  | 460  |
| Tbg972.4.3690 | <i>T. brucei</i> | 1057 | 588  | 1644 |
| Tbg972.4.370  | <i>T. brucei</i> | 44   | 555  | 598  |
| Tbg972.4.370  | <i>T. brucei</i> | 45   | 1567 | 1611 |
| Tbg972.4.370  | <i>T. brucei</i> | 45   | 1567 | 1611 |
| Tbg972.4.3730 | <i>T. brucei</i> | 44   | 1    | 44   |
| Tbg972.4.380  | <i>T. brucei</i> | 53   | 13   | 65   |
| Tbg972.4.3810 | <i>T. brucei</i> | 100  | 146  | 245  |
| Tbg972.4.3810 | <i>T. brucei</i> | 129  | 280  | 408  |
| Tbg972.4.3830 | <i>T. brucei</i> | 43   | 1    | 43   |



|               |                  |     |     |     |
|---------------|------------------|-----|-----|-----|
| Tbg972.4.3840 | <i>T. brucei</i> | 45  | 13  | 57  |
| Tbg972.4.3850 | <i>T. brucei</i> | 54  | 329 | 382 |
| Tbg972.4.3880 | <i>T. brucei</i> | 41  | 84  | 124 |
| Tbg972.4.3880 | <i>T. brucei</i> | 41  | 474 | 514 |
| Tbg972.4.3880 | <i>T. brucei</i> | 41  | 474 | 514 |
| Tbg972.4.390  | <i>T. brucei</i> | 85  | 1   | 85  |
| Tbg972.4.390  | <i>T. brucei</i> | 259 | 127 | 385 |
| Tbg972.4.3910 | <i>T. brucei</i> | 190 | 1   | 190 |
| Tbg972.4.3910 | <i>T. brucei</i> | 73  | 507 | 579 |
| Tbg972.4.3950 | <i>T. brucei</i> | 41  | 487 | 527 |
| Tbg972.4.3990 | <i>T. brucei</i> | 50  | 479 | 528 |
| Tbg972.4.4000 | <i>T. brucei</i> | 218 | 1   | 218 |
| Tbg972.4.4010 | <i>T. brucei</i> | 68  | 216 | 283 |
| Tbg972.4.4020 | <i>T. brucei</i> | 265 | 1   | 265 |
| Tbg972.4.4020 | <i>T. brucei</i> | 72  | 409 | 480 |
| Tbg972.4.4020 | <i>T. brucei</i> | 232 | 556 | 787 |
| Tbg972.4.4040 | <i>T. brucei</i> | 41  | 1   | 41  |
| Tbg972.4.4050 | <i>T. brucei</i> | 57  | 24  | 80  |
| Tbg972.4.4060 | <i>T. brucei</i> | 51  | 1   | 51  |
| Tbg972.4.4060 | <i>T. brucei</i> | 122 | 732 | 853 |
| Tbg972.4.410  | <i>T. brucei</i> | 79  | 1   | 79  |
| Tbg972.4.4100 | <i>T. brucei</i> | 86  | 1   | 86  |
| Tbg972.4.4100 | <i>T. brucei</i> | 123 | 296 | 418 |
| Tbg972.4.4110 | <i>T. brucei</i> | 51  | 1   | 51  |
| Tbg972.4.4110 | <i>T. brucei</i> | 48  | 159 | 206 |
| Tbg972.4.4110 | <i>T. brucei</i> | 48  | 159 | 206 |
| Tbg972.4.4120 | <i>T. brucei</i> | 40  | 20  | 59  |
| Tbg972.4.4130 | <i>T. brucei</i> | 70  | 1   | 70  |
| Tbg972.4.4140 | <i>T. brucei</i> | 53  | 41  | 93  |
| Tbg972.4.4150 | <i>T. brucei</i> | 49  | 1   | 49  |
| Tbg972.4.4150 | <i>T. brucei</i> | 63  | 86  | 148 |
| Tbg972.4.4180 | <i>T. brucei</i> | 172 | 23  | 194 |
| Tbg972.4.4180 | <i>T. brucei</i> | 120 | 329 | 448 |
| Tbg972.4.420  | <i>T. brucei</i> | 45  | 59  | 103 |
| Tbg972.4.4220 | <i>T. brucei</i> | 98  | 146 | 243 |
| Tbg972.4.4230 | <i>T. brucei</i> | 120 | 1   | 120 |
| Tbg972.4.4230 | <i>T. brucei</i> | 40  | 139 | 178 |
| Tbg972.4.4230 | <i>T. brucei</i> | 49  | 233 | 281 |
| Tbg972.4.4250 | <i>T. brucei</i> | 54  | 1   | 54  |
| Tbg972.4.4260 | <i>T. brucei</i> | 155 | 67  | 221 |
| Tbg972.4.4260 | <i>T. brucei</i> | 173 | 257 | 429 |
| Tbg972.4.4260 | <i>T. brucei</i> | 50  | 458 | 507 |
| Tbg972.4.4260 | <i>T. brucei</i> | 102 | 542 | 643 |
| Tbg972.4.4260 | <i>T. brucei</i> | 123 | 660 | 782 |
| Tbg972.4.4270 | <i>T. brucei</i> | 78  | 108 | 185 |
| Tbg972.4.4270 | <i>T. brucei</i> | 52  | 314 | 365 |
| Tbg972.4.4270 | <i>T. brucei</i> | 52  | 314 | 365 |

|               |                  |     |      |      |
|---------------|------------------|-----|------|------|
| Tbg972.4.4280 | <i>T. brucei</i> | 170 | 22   | 191  |
| Tbg972.4.4280 | <i>T. brucei</i> | 65  | 451  | 515  |
| Tbg972.4.4290 | <i>T. brucei</i> | 85  | 69   | 153  |
| Tbg972.4.4290 | <i>T. brucei</i> | 44  | 352  | 395  |
| Tbg972.4.4290 | <i>T. brucei</i> | 44  | 352  | 395  |
| Tbg972.4.4310 | <i>T. brucei</i> | 210 | 1    | 210  |
| Tbg972.4.4310 | <i>T. brucei</i> | 224 | 216  | 439  |
| Tbg972.4.4310 | <i>T. brucei</i> | 147 | 462  | 608  |
| Tbg972.4.4310 | <i>T. brucei</i> | 51  | 712  | 762  |
| Tbg972.4.4340 | <i>T. brucei</i> | 51  | 76   | 126  |
| Tbg972.4.4340 | <i>T. brucei</i> | 122 | 501  | 622  |
| Tbg972.4.4350 | <i>T. brucei</i> | 41  | 60   | 100  |
| Tbg972.4.4350 | <i>T. brucei</i> | 47  | 248  | 294  |
| Tbg972.4.4350 | <i>T. brucei</i> | 70  | 324  | 393  |
| Tbg972.4.4350 | <i>T. brucei</i> | 162 | 404  | 565  |
| Tbg972.4.4360 | <i>T. brucei</i> | 103 | 1    | 103  |
| Tbg972.4.4360 | <i>T. brucei</i> | 80  | 225  | 304  |
| Tbg972.4.4360 | <i>T. brucei</i> | 49  | 312  | 360  |
| Tbg972.4.4360 | <i>T. brucei</i> | 55  | 545  | 599  |
| Tbg972.4.4370 | <i>T. brucei</i> | 41  | 1    | 41   |
| Tbg972.4.4370 | <i>T. brucei</i> | 159 | 65   | 223  |
| Tbg972.4.4370 | <i>T. brucei</i> | 76  | 255  | 330  |
| Tbg972.4.4390 | <i>T. brucei</i> | 45  | 113  | 157  |
| Tbg972.4.4390 | <i>T. brucei</i> | 46  | 395  | 440  |
| Tbg972.4.4390 | <i>T. brucei</i> | 46  | 395  | 440  |
| Tbg972.4.440  | <i>T. brucei</i> | 50  | 1    | 50   |
| Tbg972.4.440  | <i>T. brucei</i> | 71  | 106  | 176  |
| Tbg972.4.440  | <i>T. brucei</i> | 49  | 516  | 564  |
| Tbg972.4.4400 | <i>T. brucei</i> | 144 | 100  | 243  |
| Tbg972.4.4400 | <i>T. brucei</i> | 359 | 265  | 623  |
| Tbg972.4.4410 | <i>T. brucei</i> | 45  | 72   | 116  |
| Tbg972.4.4460 | <i>T. brucei</i> | 53  | 357  | 409  |
| Tbg972.4.4460 | <i>T. brucei</i> | 66  | 459  | 524  |
| Tbg972.4.4460 | <i>T. brucei</i> | 43  | 548  | 590  |
| Tbg972.4.4480 | <i>T. brucei</i> | 45  | 1    | 45   |
| Tbg972.4.4500 | <i>T. brucei</i> | 47  | 509  | 555  |
| Tbg972.4.4500 | <i>T. brucei</i> | 154 | 592  | 745  |
| Tbg972.4.4500 | <i>T. brucei</i> | 146 | 1007 | 1152 |
| Tbg972.4.4500 | <i>T. brucei</i> | 47  | 1173 | 1219 |
| Tbg972.4.4500 | <i>T. brucei</i> | 340 | 1223 | 1562 |
| Tbg972.4.4510 | <i>T. brucei</i> | 57  | 1186 | 1242 |
| Tbg972.4.4520 | <i>T. brucei</i> | 57  | 1187 | 1243 |
| Tbg972.4.4530 | <i>T. brucei</i> | 55  | 1196 | 1250 |
| Tbg972.4.4540 | <i>T. brucei</i> | 57  | 1186 | 1242 |
| Tbg972.4.4580 | <i>T. brucei</i> | 47  | 1171 | 1217 |
| Tbg972.4.4590 | <i>T. brucei</i> | 251 | 1    | 251  |
| Tbg972.4.4590 | <i>T. brucei</i> | 141 | 464  | 604  |

|               |                  |     |      |      |
|---------------|------------------|-----|------|------|
| Tbg972.4.4590 | <i>T. brucei</i> | 83  | 643  | 725  |
| Tbg972.4.4590 | <i>T. brucei</i> | 116 | 727  | 842  |
| Tbg972.4.4590 | <i>T. brucei</i> | 69  | 879  | 947  |
| Tbg972.4.4600 | <i>T. brucei</i> | 53  | 1    | 53   |
| Tbg972.4.4600 | <i>T. brucei</i> | 52  | 177  | 228  |
| Tbg972.4.4600 | <i>T. brucei</i> | 80  | 664  | 743  |
| Tbg972.4.4600 | <i>T. brucei</i> | 127 | 949  | 1075 |
| Tbg972.4.4600 | <i>T. brucei</i> | 105 | 1392 | 1496 |
| Tbg972.4.4610 | <i>T. brucei</i> | 328 | 1    | 328  |
| Tbg972.4.4610 | <i>T. brucei</i> | 108 | 357  | 464  |
| Tbg972.4.4610 | <i>T. brucei</i> | 210 | 544  | 753  |
| Tbg972.4.4610 | <i>T. brucei</i> | 247 | 776  | 1022 |
| Tbg972.4.4610 | <i>T. brucei</i> | 106 | 1065 | 1170 |
| Tbg972.4.4620 | <i>T. brucei</i> | 98  | 1    | 98   |
| Tbg972.4.4620 | <i>T. brucei</i> | 374 | 106  | 479  |
| Tbg972.4.4620 | <i>T. brucei</i> | 70  | 583  | 652  |
| Tbg972.4.4620 | <i>T. brucei</i> | 110 | 700  | 809  |
| Tbg972.4.4620 | <i>T. brucei</i> | 123 | 1152 | 1274 |
| Tbg972.4.4660 | <i>T. brucei</i> | 83  | 21   | 103  |
| Tbg972.4.4660 | <i>T. brucei</i> | 97  | 108  | 204  |
| Tbg972.4.4660 | <i>T. brucei</i> | 43  | 319  | 361  |
| Tbg972.4.4660 | <i>T. brucei</i> | 42  | 402  | 443  |
| Tbg972.4.4669 | <i>T. brucei</i> | 53  | 50   | 102  |
| Tbg972.4.4669 | <i>T. brucei</i> | 78  | 140  | 217  |
| Tbg972.4.4669 | <i>T. brucei</i> | 78  | 140  | 217  |
| Tbg972.4.4670 | <i>T. brucei</i> | 87  | 1    | 87   |
| Tbg972.4.4670 | <i>T. brucei</i> | 172 | 124  | 295  |
| Tbg972.4.4670 | <i>T. brucei</i> | 128 | 299  | 426  |
| Tbg972.4.4670 | <i>T. brucei</i> | 217 | 480  | 696  |
| Tbg972.4.4700 | <i>T. brucei</i> | 53  | 115  | 167  |
| Tbg972.4.4700 | <i>T. brucei</i> | 53  | 332  | 384  |
| Tbg972.4.4700 | <i>T. brucei</i> | 114 | 570  | 683  |
| Tbg972.4.4700 | <i>T. brucei</i> | 43  | 768  | 810  |
| Tbg972.4.4720 | <i>T. brucei</i> | 48  | 66   | 113  |
| Tbg972.4.4730 | <i>T. brucei</i> | 81  | 75   | 155  |
| Tbg972.4.4730 | <i>T. brucei</i> | 143 | 218  | 360  |
| Tbg972.4.4730 | <i>T. brucei</i> | 42  | 462  | 503  |
| Tbg972.4.4730 | <i>T. brucei</i> | 53  | 633  | 685  |
| Tbg972.4.4730 | <i>T. brucei</i> | 60  | 715  | 774  |
| Tbg972.4.4730 | <i>T. brucei</i> | 59  | 822  | 880  |
| Tbg972.4.4750 | <i>T. brucei</i> | 53  | 152  | 204  |
| Tbg972.4.4750 | <i>T. brucei</i> | 44  | 360  | 403  |
| Tbg972.4.4750 | <i>T. brucei</i> | 81  | 465  | 545  |
| Tbg972.4.4750 | <i>T. brucei</i> | 43  | 613  | 655  |
| Tbg972.4.4750 | <i>T. brucei</i> | 78  | 760  | 837  |
| Tbg972.4.4750 | <i>T. brucei</i> | 130 | 898  | 1027 |
| Tbg972.4.4770 | <i>T. brucei</i> | 78  | 1    | 78   |

|               |                  |     |      |      |
|---------------|------------------|-----|------|------|
| Tbg972.4.4770 | <i>T. brucei</i> | 177 | 144  | 320  |
| Tbg972.4.4780 | <i>T. brucei</i> | 75  | 145  | 219  |
| Tbg972.4.480  | <i>T. brucei</i> | 49  | 227  | 275  |
| Tbg972.4.4820 | <i>T. brucei</i> | 59  | 116  | 174  |
| Tbg972.4.4840 | <i>T. brucei</i> | 48  | 97   | 144  |
| Tbg972.4.4860 | <i>T. brucei</i> | 51  | 1    | 51   |
| Tbg972.4.4866 | <i>T. brucei</i> | 43  | 1    | 43   |
| Tbg972.4.4866 | <i>T. brucei</i> | 80  | 151  | 230  |
| Tbg972.4.4866 | <i>T. brucei</i> | 80  | 151  | 230  |
| Tbg972.4.4870 | <i>T. brucei</i> | 67  | 378  | 444  |
| Tbg972.4.4880 | <i>T. brucei</i> | 96  | 50   | 145  |
| Tbg972.4.4890 | <i>T. brucei</i> | 59  | 1    | 59   |
| Tbg972.4.490  | <i>T. brucei</i> | 42  | 97   | 138  |
| Tbg972.4.4910 | <i>T. brucei</i> | 44  | 71   | 114  |
| Tbg972.4.4920 | <i>T. brucei</i> | 60  | 822  | 881  |
| Tbg972.4.4930 | <i>T. brucei</i> | 46  | 175  | 220  |
| Tbg972.4.4930 | <i>T. brucei</i> | 79  | 249  | 327  |
| Tbg972.4.4930 | <i>T. brucei</i> | 79  | 249  | 327  |
| Tbg972.4.4940 | <i>T. brucei</i> | 52  | 93   | 144  |
| Tbg972.4.4950 | <i>T. brucei</i> | 53  | 80   | 132  |
| Tbg972.4.4960 | <i>T. brucei</i> | 116 | 109  | 224  |
| Tbg972.4.4980 | <i>T. brucei</i> | 91  | 34   | 124  |
| Tbg972.4.4984 | <i>T. brucei</i> | 41  | 34   | 74   |
| Tbg972.4.5000 | <i>T. brucei</i> | 47  | 1    | 47   |
| Tbg972.4.5020 | <i>T. brucei</i> | 47  | 1    | 47   |
| Tbg972.4.5040 | <i>T. brucei</i> | 64  | 96   | 159  |
| Tbg972.4.5040 | <i>T. brucei</i> | 226 | 375  | 600  |
| Tbg972.4.5070 | <i>T. brucei</i> | 67  | 1    | 67   |
| Tbg972.4.5070 | <i>T. brucei</i> | 56  | 90   | 145  |
| Tbg972.4.5070 | <i>T. brucei</i> | 78  | 179  | 256  |
| Tbg972.4.5070 | <i>T. brucei</i> | 41  | 292  | 332  |
| Tbg972.4.5070 | <i>T. brucei</i> | 71  | 424  | 494  |
| Tbg972.4.5080 | <i>T. brucei</i> | 45  | 41   | 85   |
| Tbg972.4.5080 | <i>T. brucei</i> | 118 | 102  | 219  |
| Tbg972.4.5090 | <i>T. brucei</i> | 57  | 202  | 258  |
| Tbg972.4.5110 | <i>T. brucei</i> | 50  | 132  | 181  |
| Tbg972.4.5110 | <i>T. brucei</i> | 77  | 409  | 485  |
| Tbg972.4.5110 | <i>T. brucei</i> | 40  | 622  | 661  |
| Tbg972.4.5110 | <i>T. brucei</i> | 62  | 722  | 783  |
| Tbg972.4.5110 | <i>T. brucei</i> | 41  | 929  | 969  |
| Tbg972.4.5110 | <i>T. brucei</i> | 56  | 1150 | 1205 |
| Tbg972.4.5110 | <i>T. brucei</i> | 68  | 1221 | 1288 |
| Tbg972.4.5120 | <i>T. brucei</i> | 101 | 1    | 101  |
| Tbg972.4.5120 | <i>T. brucei</i> | 95  | 186  | 280  |
| Tbg972.4.5120 | <i>T. brucei</i> | 63  | 285  | 347  |
| Tbg972.4.5120 | <i>T. brucei</i> | 40  | 430  | 469  |
| Tbg972.4.5120 | <i>T. brucei</i> | 60  | 533  | 592  |

|               |                  |     |      |      |
|---------------|------------------|-----|------|------|
| Tbg972.4.5130 | <i>T. brucei</i> | 85  | 1    | 85   |
| Tbg972.4.5130 | <i>T. brucei</i> | 75  | 158  | 232  |
| Tbg972.4.5130 | <i>T. brucei</i> | 48  | 329  | 376  |
| Tbg972.4.5130 | <i>T. brucei</i> | 49  | 456  | 504  |
| Tbg972.4.5140 | <i>T. brucei</i> | 59  | 1    | 59   |
| Tbg972.4.5140 | <i>T. brucei</i> | 62  | 242  | 303  |
| Tbg972.4.5180 | <i>T. brucei</i> | 56  | 515  | 570  |
| Tbg972.4.5180 | <i>T. brucei</i> | 49  | 811  | 859  |
| Tbg972.4.5200 | <i>T. brucei</i> | 109 | 201  | 309  |
| Tbg972.4.5200 | <i>T. brucei</i> | 47  | 348  | 394  |
| Tbg972.4.5210 | <i>T. brucei</i> | 43  | 142  | 184  |
| Tbg972.4.5210 | <i>T. brucei</i> | 43  | 927  | 969  |
| Tbg972.4.5210 | <i>T. brucei</i> | 234 | 1532 | 1765 |
| Tbg972.4.5220 | <i>T. brucei</i> | 50  | 20   | 69   |
| Tbg972.4.5230 | <i>T. brucei</i> | 44  | 106  | 149  |
| Tbg972.4.5230 | <i>T. brucei</i> | 68  | 538  | 605  |
| Tbg972.4.5250 | <i>T. brucei</i> | 116 | 1    | 116  |
| Tbg972.4.5250 | <i>T. brucei</i> | 141 | 131  | 271  |
| Tbg972.4.5285 | <i>T. brucei</i> | 51  | 1    | 51   |
| Tbg972.4.5300 | <i>T. brucei</i> | 175 | 1    | 175  |
| Tbg972.4.5300 | <i>T. brucei</i> | 165 | 211  | 375  |
| Tbg972.4.5305 | <i>T. brucei</i> | 230 | 1    | 230  |
| Tbg972.4.5305 | <i>T. brucei</i> | 96  | 233  | 328  |
| Tbg972.4.5305 | <i>T. brucei</i> | 972 | 379  | 1350 |
| Tbg972.4.5320 | <i>T. brucei</i> | 84  | 89   | 172  |
| Tbg972.4.5330 | <i>T. brucei</i> | 42  | 50   | 91   |
| Tbg972.4.5340 | <i>T. brucei</i> | 105 | 19   | 123  |
| Tbg972.4.5340 | <i>T. brucei</i> | 156 | 219  | 374  |
| Tbg972.4.5350 | <i>T. brucei</i> | 55  | 37   | 91   |
| Tbg972.4.5360 | <i>T. brucei</i> | 55  | 90   | 144  |
| Tbg972.4.5370 | <i>T. brucei</i> | 96  | 1    | 96   |
| Tbg972.4.5370 | <i>T. brucei</i> | 47  | 114  | 160  |
| Tbg972.4.5370 | <i>T. brucei</i> | 51  | 212  | 262  |
| Tbg972.4.5370 | <i>T. brucei</i> | 60  | 588  | 647  |
| Tbg972.4.5390 | <i>T. brucei</i> | 447 | 1    | 447  |
| Tbg972.4.5390 | <i>T. brucei</i> | 49  | 539  | 587  |
| Tbg972.4.5390 | <i>T. brucei</i> | 49  | 539  | 587  |
| Tbg972.4.540  | <i>T. brucei</i> | 43  | 1    | 43   |
| Tbg972.4.540  | <i>T. brucei</i> | 77  | 622  | 698  |
| Tbg972.4.540  | <i>T. brucei</i> | 77  | 622  | 698  |
| Tbg972.4.5410 | <i>T. brucei</i> | 60  | 1    | 60   |
| Tbg972.4.5410 | <i>T. brucei</i> | 62  | 88   | 149  |
| Tbg972.4.5420 | <i>T. brucei</i> | 43  | 66   | 108  |
| Tbg972.4.5420 | <i>T. brucei</i> | 80  | 132  | 211  |
| Tbg972.4.5450 | <i>T. brucei</i> | 47  | 39   | 85   |
| Tbg972.4.5450 | <i>T. brucei</i> | 40  | 145  | 184  |
| Tbg972.4.5460 | <i>T. brucei</i> | 46  | 1    | 46   |

|               |                  |     |      |      |
|---------------|------------------|-----|------|------|
| Tbg972.4.5480 | <i>T. brucei</i> | 43  | 685  | 727  |
| Tbg972.4.5480 | <i>T. brucei</i> | 79  | 810  | 888  |
| Tbg972.4.5490 | <i>T. brucei</i> | 42  | 1    | 42   |
| Tbg972.4.5490 | <i>T. brucei</i> | 82  | 73   | 154  |
| Tbg972.4.5490 | <i>T. brucei</i> | 123 | 219  | 341  |
| Tbg972.4.5490 | <i>T. brucei</i> | 49  | 343  | 391  |
| Tbg972.4.5490 | <i>T. brucei</i> | 65  | 466  | 530  |
| Tbg972.4.5490 | <i>T. brucei</i> | 63  | 616  | 678  |
| Tbg972.4.5490 | <i>T. brucei</i> | 68  | 816  | 883  |
| Tbg972.4.550  | <i>T. brucei</i> | 75  | 543  | 617  |
| Tbg972.4.550  | <i>T. brucei</i> | 64  | 732  | 795  |
| Tbg972.4.550  | <i>T. brucei</i> | 64  | 732  | 795  |
| Tbg972.4.5500 | <i>T. brucei</i> | 470 | 1    | 470  |
| Tbg972.4.5500 | <i>T. brucei</i> | 356 | 480  | 835  |
| Tbg972.4.5540 | <i>T. brucei</i> | 55  | 636  | 690  |
| Tbg972.4.5540 | <i>T. brucei</i> | 40  | 963  | 1002 |
| Tbg972.4.5540 | <i>T. brucei</i> | 54  | 1329 | 1382 |
| Tbg972.4.5540 | <i>T. brucei</i> | 64  | 1397 | 1460 |
| Tbg972.4.5560 | <i>T. brucei</i> | 67  | 104  | 170  |
| Tbg972.4.580  | <i>T. brucei</i> | 153 | 1    | 153  |
| Tbg972.4.590  | <i>T. brucei</i> | 76  | 2425 | 2500 |
| Tbg972.4.60   | <i>T. brucei</i> | 79  | 1    | 79   |
| Tbg972.4.600  | <i>T. brucei</i> | 64  | 39   | 102  |
| Tbg972.4.620  | <i>T. brucei</i> | 105 | 1    | 105  |
| Tbg972.4.620  | <i>T. brucei</i> | 50  | 113  | 162  |
| Tbg972.4.640  | <i>T. brucei</i> | 41  | 99   | 139  |
| Tbg972.4.650  | <i>T. brucei</i> | 43  | 70   | 112  |
| Tbg972.4.670  | <i>T. brucei</i> | 74  | 1240 | 1313 |
| Tbg972.4.670  | <i>T. brucei</i> | 43  | 2552 | 2594 |
| Tbg972.4.670  | <i>T. brucei</i> | 100 | 3149 | 3248 |
| Tbg972.4.670  | <i>T. brucei</i> | 67  | 3355 | 3421 |
| Tbg972.4.670  | <i>T. brucei</i> | 83  | 3673 | 3755 |
| Tbg972.4.670  | <i>T. brucei</i> | 44  | 4078 | 4121 |
| Tbg972.4.670  | <i>T. brucei</i> | 51  | 4306 | 4356 |
| Tbg972.4.680  | <i>T. brucei</i> | 80  | 11   | 90   |
| Tbg972.4.720  | <i>T. brucei</i> | 248 | 45   | 292  |
| Tbg972.4.730  | <i>T. brucei</i> | 71  | 50   | 120  |
| Tbg972.4.780  | <i>T. brucei</i> | 55  | 127  | 181  |
| Tbg972.4.800  | <i>T. brucei</i> | 51  | 223  | 273  |
| Tbg972.4.830  | <i>T. brucei</i> | 128 | 94   | 221  |
| Tbg972.4.850  | <i>T. brucei</i> | 69  | 46   | 114  |
| Tbg972.4.860  | <i>T. brucei</i> | 43  | 233  | 275  |
| Tbg972.4.870  | <i>T. brucei</i> | 95  | 43   | 137  |
| Tbg972.4.890  | <i>T. brucei</i> | 44  | 446  | 489  |
| Tbg972.4.90   | <i>T. brucei</i> | 40  | 58   | 97   |
| Tbg972.4.960  | <i>T. brucei</i> | 45  | 121  | 165  |
| Tbg972.4.970  | <i>T. brucei</i> | 73  | 236  | 308  |

|               |                  |     |     |     |
|---------------|------------------|-----|-----|-----|
| Tbg972.4.980  | <i>T. brucei</i> | 43  | 353 | 395 |
| Tbg972.4.980  | <i>T. brucei</i> | 41  | 701 | 741 |
| Tbg972.4.980  | <i>T. brucei</i> | 41  | 701 | 741 |
| Tbg972.4.990  | <i>T. brucei</i> | 448 | 33  | 480 |
| Tbg972.4.990  | <i>T. brucei</i> | 46  | 524 | 569 |
| Tbg972.4.990  | <i>T. brucei</i> | 125 | 636 | 760 |
| Tbg972.5.100  | <i>T. brucei</i> | 153 | 72  | 224 |
| Tbg972.5.1000 | <i>T. brucei</i> | 98  | 297 | 394 |
| Tbg972.5.1000 | <i>T. brucei</i> | 147 | 505 | 651 |
| Tbg972.5.1010 | <i>T. brucei</i> | 40  | 1   | 40  |
| Tbg972.5.1010 | <i>T. brucei</i> | 95  | 188 | 282 |
| Tbg972.5.1010 | <i>T. brucei</i> | 62  | 731 | 792 |
| Tbg972.5.1010 | <i>T. brucei</i> | 58  | 908 | 965 |
| Tbg972.5.1020 | <i>T. brucei</i> | 47  | 45  | 91  |
| Tbg972.5.1020 | <i>T. brucei</i> | 105 | 121 | 225 |
| Tbg972.5.1030 | <i>T. brucei</i> | 44  | 47  | 90  |
| Tbg972.5.1030 | <i>T. brucei</i> | 114 | 121 | 234 |
| Tbg972.5.1040 | <i>T. brucei</i> | 167 | 1   | 167 |
| Tbg972.5.1050 | <i>T. brucei</i> | 157 | 32  | 188 |
| Tbg972.5.1060 | <i>T. brucei</i> | 153 | 1   | 153 |
| Tbg972.5.1060 | <i>T. brucei</i> | 62  | 163 | 224 |
| Tbg972.5.1060 | <i>T. brucei</i> | 238 | 259 | 496 |
| Tbg972.5.1060 | <i>T. brucei</i> | 87  | 654 | 740 |
| Tbg972.5.1100 | <i>T. brucei</i> | 69  | 90  | 158 |
| Tbg972.5.1100 | <i>T. brucei</i> | 46  | 437 | 482 |
| Tbg972.5.1100 | <i>T. brucei</i> | 46  | 437 | 482 |
| Tbg972.5.1110 | <i>T. brucei</i> | 170 | 160 | 329 |
| Tbg972.5.1110 | <i>T. brucei</i> | 116 | 405 | 520 |
| Tbg972.5.1150 | <i>T. brucei</i> | 44  | 104 | 147 |
| Tbg972.5.1170 | <i>T. brucei</i> | 50  | 196 | 245 |
| Tbg972.5.1180 | <i>T. brucei</i> | 59  | 1   | 59  |
| Tbg972.5.1180 | <i>T. brucei</i> | 71  | 293 | 363 |
| Tbg972.5.1180 | <i>T. brucei</i> | 71  | 293 | 363 |
| Tbg972.5.1190 | <i>T. brucei</i> | 196 | 1   | 196 |
| Tbg972.5.1200 | <i>T. brucei</i> | 118 | 30  | 147 |
| Tbg972.5.1200 | <i>T. brucei</i> | 50  | 361 | 410 |
| Tbg972.5.1200 | <i>T. brucei</i> | 48  | 512 | 559 |
| Tbg972.5.1210 | <i>T. brucei</i> | 55  | 57  | 111 |
| Tbg972.5.1220 | <i>T. brucei</i> | 690 | 1   | 690 |
| Tbg972.5.1220 | <i>T. brucei</i> | 69  | 698 | 766 |
| Tbg972.5.1220 | <i>T. brucei</i> | 186 | 808 | 993 |
| Tbg972.5.1230 | <i>T. brucei</i> | 317 | 1   | 317 |
| Tbg972.5.1230 | <i>T. brucei</i> | 54  | 320 | 373 |
| Tbg972.5.1280 | <i>T. brucei</i> | 89  | 12  | 100 |
| Tbg972.5.1280 | <i>T. brucei</i> | 58  | 392 | 449 |
| Tbg972.5.1300 | <i>T. brucei</i> | 60  | 29  | 88  |
| Tbg972.5.1350 | <i>T. brucei</i> | 43  | 1   | 43  |

|               |                  |     |      |      |
|---------------|------------------|-----|------|------|
| Tbg972.5.1350 | <i>T. brucei</i> | 44  | 153  | 196  |
| Tbg972.5.1350 | <i>T. brucei</i> | 44  | 153  | 196  |
| Tbg972.5.1370 | <i>T. brucei</i> | 42  | 83   | 124  |
| Tbg972.5.1380 | <i>T. brucei</i> | 47  | 89   | 135  |
| Tbg972.5.1380 | <i>T. brucei</i> | 379 | 448  | 826  |
| Tbg972.5.1380 | <i>T. brucei</i> | 85  | 840  | 924  |
| Tbg972.5.1380 | <i>T. brucei</i> | 143 | 1032 | 1174 |
| Tbg972.5.1390 | <i>T. brucei</i> | 62  | 192  | 253  |
| Tbg972.5.1400 | <i>T. brucei</i> | 42  | 83   | 124  |
| Tbg972.5.1410 | <i>T. brucei</i> | 47  | 20   | 66   |
| Tbg972.5.1420 | <i>T. brucei</i> | 191 | 1    | 191  |
| Tbg972.5.1460 | <i>T. brucei</i> | 84  | 100  | 183  |
| Tbg972.5.1460 | <i>T. brucei</i> | 381 | 535  | 915  |
| Tbg972.5.1470 | <i>T. brucei</i> | 123 | 1    | 123  |
| Tbg972.5.1480 | <i>T. brucei</i> | 66  | 1    | 66   |
| Tbg972.5.1480 | <i>T. brucei</i> | 114 | 124  | 237  |
| Tbg972.5.1490 | <i>T. brucei</i> | 47  | 512  | 558  |
| Tbg972.5.1490 | <i>T. brucei</i> | 50  | 603  | 652  |
| Tbg972.5.1520 | <i>T. brucei</i> | 169 | 13   | 181  |
| Tbg972.5.1520 | <i>T. brucei</i> | 149 | 212  | 360  |
| Tbg972.5.1540 | <i>T. brucei</i> | 63  | 198  | 260  |
| Tbg972.5.1560 | <i>T. brucei</i> | 41  | 1    | 41   |
| Tbg972.5.1560 | <i>T. brucei</i> | 240 | 253  | 492  |
| Tbg972.5.1560 | <i>T. brucei</i> | 159 | 512  | 670  |
| Tbg972.5.1560 | <i>T. brucei</i> | 160 | 928  | 1087 |
| Tbg972.5.1560 | <i>T. brucei</i> | 99  | 1345 | 1443 |
| Tbg972.5.1560 | <i>T. brucei</i> | 106 | 1759 | 1864 |
| Tbg972.5.1560 | <i>T. brucei</i> | 90  | 1956 | 2045 |
| Tbg972.5.1560 | <i>T. brucei</i> | 44  | 2172 | 2215 |
| Tbg972.5.1560 | <i>T. brucei</i> | 67  | 2451 | 2517 |
| Tbg972.5.1560 | <i>T. brucei</i> | 111 | 2601 | 2711 |
| Tbg972.5.1590 | <i>T. brucei</i> | 44  | 111  | 154  |
| Tbg972.5.1590 | <i>T. brucei</i> | 56  | 310  | 365  |
| Tbg972.5.160  | <i>T. brucei</i> | 76  | 80   | 155  |
| Tbg972.5.1600 | <i>T. brucei</i> | 48  | 1    | 48   |
| Tbg972.5.1620 | <i>T. brucei</i> | 51  | 684  | 734  |
| Tbg972.5.1640 | <i>T. brucei</i> | 150 | 1    | 150  |
| Tbg972.5.1650 | <i>T. brucei</i> | 339 | 1    | 339  |
| Tbg972.5.1650 | <i>T. brucei</i> | 101 | 399  | 499  |
| Tbg972.5.1650 | <i>T. brucei</i> | 184 | 506  | 689  |
| Tbg972.5.1650 | <i>T. brucei</i> | 132 | 731  | 862  |
| Tbg972.5.1670 | <i>T. brucei</i> | 42  | 108  | 149  |
| Tbg972.5.1690 | <i>T. brucei</i> | 108 | 81   | 188  |
| Tbg972.5.1700 | <i>T. brucei</i> | 483 | 1    | 483  |
| Tbg972.5.1720 | <i>T. brucei</i> | 46  | 168  | 213  |
| Tbg972.5.1730 | <i>T. brucei</i> | 43  | 200  | 242  |
| Tbg972.5.1760 | <i>T. brucei</i> | 70  | 146  | 215  |



|               |                  |     |     |     |
|---------------|------------------|-----|-----|-----|
| Tbg972.5.1780 | <i>T. brucei</i> | 47  | 69  | 115 |
| Tbg972.5.1780 | <i>T. brucei</i> | 81  | 392 | 472 |
| Tbg972.5.1780 | <i>T. brucei</i> | 81  | 392 | 472 |
| Tbg972.5.1790 | <i>T. brucei</i> | 40  | 103 | 142 |
| Tbg972.5.180  | <i>T. brucei</i> | 72  | 55  | 126 |
| Tbg972.5.1800 | <i>T. brucei</i> | 72  | 68  | 139 |
| Tbg972.5.1810 | <i>T. brucei</i> | 55  | 1   | 55  |
| Tbg972.5.1820 | <i>T. brucei</i> | 95  | 1   | 95  |
| Tbg972.5.1830 | <i>T. brucei</i> | 41  | 623 | 663 |
| Tbg972.5.1890 | <i>T. brucei</i> | 90  | 48  | 137 |
| Tbg972.5.1890 | <i>T. brucei</i> | 41  | 229 | 269 |
| Tbg972.5.1890 | <i>T. brucei</i> | 41  | 229 | 269 |
| Tbg972.5.1910 | <i>T. brucei</i> | 70  | 81  | 150 |
| Tbg972.5.1910 | <i>T. brucei</i> | 66  | 204 | 269 |
| Tbg972.5.1910 | <i>T. brucei</i> | 99  | 272 | 370 |
| Tbg972.5.1930 | <i>T. brucei</i> | 72  | 80  | 151 |
| Tbg972.5.1930 | <i>T. brucei</i> | 45  | 213 | 257 |
| Tbg972.5.1930 | <i>T. brucei</i> | 99  | 273 | 371 |
| Tbg972.5.1950 | <i>T. brucei</i> | 70  | 83  | 152 |
| Tbg972.5.1950 | <i>T. brucei</i> | 50  | 211 | 260 |
| Tbg972.5.1950 | <i>T. brucei</i> | 98  | 274 | 371 |
| Tbg972.5.1990 | <i>T. brucei</i> | 74  | 67  | 140 |
| Tbg972.5.200  | <i>T. brucei</i> | 108 | 90  | 197 |
| Tbg972.5.2040 | <i>T. brucei</i> | 97  | 23  | 119 |
| Tbg972.5.2040 | <i>T. brucei</i> | 239 | 436 | 674 |
| Tbg972.5.2050 | <i>T. brucei</i> | 126 | 31  | 156 |
| Tbg972.5.2050 | <i>T. brucei</i> | 40  | 200 | 239 |
| Tbg972.5.2050 | <i>T. brucei</i> | 127 | 245 | 371 |
| Tbg972.5.2050 | <i>T. brucei</i> | 46  | 373 | 418 |
| Tbg972.5.2050 | <i>T. brucei</i> | 70  | 471 | 540 |
| Tbg972.5.2060 | <i>T. brucei</i> | 111 | 201 | 311 |
| Tbg972.5.2080 | <i>T. brucei</i> | 56  | 1   | 56  |
| Tbg972.5.2100 | <i>T. brucei</i> | 45  | 59  | 103 |
| Tbg972.5.2100 | <i>T. brucei</i> | 45  | 157 | 201 |
| Tbg972.5.2100 | <i>T. brucei</i> | 49  | 287 | 335 |
| Tbg972.5.2120 | <i>T. brucei</i> | 58  | 241 | 298 |
| Tbg972.5.2120 | <i>T. brucei</i> | 179 | 463 | 641 |
| Tbg972.5.2140 | <i>T. brucei</i> | 54  | 56  | 109 |
| Tbg972.5.2150 | <i>T. brucei</i> | 134 | 34  | 167 |
| Tbg972.5.2160 | <i>T. brucei</i> | 152 | 33  | 184 |
| Tbg972.5.2160 | <i>T. brucei</i> | 126 | 290 | 415 |
| Tbg972.5.2160 | <i>T. brucei</i> | 84  | 483 | 566 |
| Tbg972.5.2170 | <i>T. brucei</i> | 62  | 52  | 113 |
| Tbg972.5.2200 | <i>T. brucei</i> | 68  | 187 | 254 |
| Tbg972.5.2210 | <i>T. brucei</i> | 184 | 206 | 389 |
| Tbg972.5.2210 | <i>T. brucei</i> | 159 | 407 | 565 |
| Tbg972.5.2220 | <i>T. brucei</i> | 45  | 178 | 222 |

|               |                  |     |      |      |
|---------------|------------------|-----|------|------|
| Tbg972.5.2230 | <i>T. brucei</i> | 112 | 1    | 112  |
| Tbg972.5.2260 | <i>T. brucei</i> | 60  | 1    | 60   |
| Tbg972.5.2260 | <i>T. brucei</i> | 442 | 222  | 663  |
| Tbg972.5.2270 | <i>T. brucei</i> | 244 | 29   | 272  |
| Tbg972.5.2280 | <i>T. brucei</i> | 64  | 1    | 64   |
| Tbg972.5.2300 | <i>T. brucei</i> | 143 | 1    | 143  |
| Tbg972.5.2310 | <i>T. brucei</i> | 61  | 56   | 116  |
| Tbg972.5.2330 | <i>T. brucei</i> | 183 | 1    | 183  |
| Tbg972.5.2330 | <i>T. brucei</i> | 43  | 451  | 493  |
| Tbg972.5.2330 | <i>T. brucei</i> | 70  | 578  | 647  |
| Tbg972.5.2330 | <i>T. brucei</i> | 49  | 667  | 715  |
| Tbg972.5.2330 | <i>T. brucei</i> | 47  | 745  | 791  |
| Tbg972.5.2330 | <i>T. brucei</i> | 41  | 1172 | 1212 |
| Tbg972.5.2330 | <i>T. brucei</i> | 42  | 1472 | 1513 |
| Tbg972.5.2330 | <i>T. brucei</i> | 48  | 1671 | 1718 |
| Tbg972.5.2350 | <i>T. brucei</i> | 183 | 47   | 229  |
| Tbg972.5.2350 | <i>T. brucei</i> | 87  | 260  | 346  |
| Tbg972.5.2350 | <i>T. brucei</i> | 59  | 394  | 452  |
| Tbg972.5.240  | <i>T. brucei</i> | 70  | 14   | 83   |
| Tbg972.5.2410 | <i>T. brucei</i> | 54  | 36   | 89   |
| Tbg972.5.2410 | <i>T. brucei</i> | 67  | 130  | 196  |
| Tbg972.5.2410 | <i>T. brucei</i> | 76  | 554  | 629  |
| Tbg972.5.2420 | <i>T. brucei</i> | 46  | 1    | 46   |
| Tbg972.5.2430 | <i>T. brucei</i> | 42  | 62   | 103  |
| Tbg972.5.2440 | <i>T. brucei</i> | 55  | 68   | 122  |
| Tbg972.5.2450 | <i>T. brucei</i> | 76  | 1    | 76   |
| Tbg972.5.2450 | <i>T. brucei</i> | 55  | 171  | 225  |
| Tbg972.5.2450 | <i>T. brucei</i> | 105 | 227  | 331  |
| Tbg972.5.2450 | <i>T. brucei</i> | 102 | 376  | 477  |
| Tbg972.5.2460 | <i>T. brucei</i> | 174 | 68   | 241  |
| Tbg972.5.2460 | <i>T. brucei</i> | 87  | 464  | 550  |
| Tbg972.5.2460 | <i>T. brucei</i> | 87  | 464  | 550  |
| Tbg972.5.2470 | <i>T. brucei</i> | 91  | 507  | 597  |
| Tbg972.5.2480 | <i>T. brucei</i> | 50  | 99   | 148  |
| Tbg972.5.2490 | <i>T. brucei</i> | 45  | 56   | 100  |
| Tbg972.5.2550 | <i>T. brucei</i> | 77  | 99   | 175  |
| Tbg972.5.2550 | <i>T. brucei</i> | 119 | 199  | 317  |
| Tbg972.5.2550 | <i>T. brucei</i> | 143 | 324  | 466  |
| Tbg972.5.2550 | <i>T. brucei</i> | 139 | 1202 | 1340 |
| Tbg972.5.2550 | <i>T. brucei</i> | 47  | 1361 | 1407 |
| Tbg972.5.2550 | <i>T. brucei</i> | 154 | 1878 | 2031 |
| Tbg972.5.2560 | <i>T. brucei</i> | 65  | 29   | 93   |
| Tbg972.5.2560 | <i>T. brucei</i> | 47  | 134  | 180  |
| Tbg972.5.2560 | <i>T. brucei</i> | 43  | 183  | 225  |
| Tbg972.5.2570 | <i>T. brucei</i> | 78  | 42   | 119  |
| Tbg972.5.2570 | <i>T. brucei</i> | 343 | 200  | 542  |
| Tbg972.5.2570 | <i>T. brucei</i> | 42  | 756  | 797  |

|               |                  |     |     |      |
|---------------|------------------|-----|-----|------|
| Tbg972.5.2570 | <i>T. brucei</i> | 53  | 835 | 887  |
| Tbg972.5.2590 | <i>T. brucei</i> | 102 | 1   | 102  |
| Tbg972.5.2590 | <i>T. brucei</i> | 94  | 104 | 197  |
| Tbg972.5.2590 | <i>T. brucei</i> | 62  | 290 | 351  |
| Tbg972.5.2590 | <i>T. brucei</i> | 112 | 437 | 548  |
| Tbg972.5.2600 | <i>T. brucei</i> | 57  | 50  | 106  |
| Tbg972.5.2610 | <i>T. brucei</i> | 61  | 155 | 215  |
| Tbg972.5.2610 | <i>T. brucei</i> | 251 | 273 | 523  |
| Tbg972.5.2610 | <i>T. brucei</i> | 89  | 635 | 723  |
| Tbg972.5.2620 | <i>T. brucei</i> | 237 | 87  | 323  |
| Tbg972.5.2620 | <i>T. brucei</i> | 41  | 537 | 577  |
| Tbg972.5.2620 | <i>T. brucei</i> | 74  | 612 | 685  |
| Tbg972.5.2620 | <i>T. brucei</i> | 104 | 989 | 1092 |
| Tbg972.5.2630 | <i>T. brucei</i> | 333 | 47  | 379  |
| Tbg972.5.2630 | <i>T. brucei</i> | 63  | 496 | 558  |
| Tbg972.5.2660 | <i>T. brucei</i> | 116 | 114 | 229  |
| Tbg972.5.2660 | <i>T. brucei</i> | 45  | 270 | 314  |
| Tbg972.5.2660 | <i>T. brucei</i> | 175 | 346 | 520  |
| Tbg972.5.2680 | <i>T. brucei</i> | 117 | 188 | 304  |
| Tbg972.5.2690 | <i>T. brucei</i> | 114 | 87  | 200  |
| Tbg972.5.2710 | <i>T. brucei</i> | 42  | 101 | 142  |
| Tbg972.5.2710 | <i>T. brucei</i> | 82  | 464 | 545  |
| Tbg972.5.2710 | <i>T. brucei</i> | 82  | 464 | 545  |
| Tbg972.5.2720 | <i>T. brucei</i> | 54  | 1   | 54   |
| Tbg972.5.2730 | <i>T. brucei</i> | 60  | 1   | 60   |
| Tbg972.5.2740 | <i>T. brucei</i> | 49  | 40  | 88   |
| Tbg972.5.2740 | <i>T. brucei</i> | 193 | 139 | 331  |
| Tbg972.5.2760 | <i>T. brucei</i> | 80  | 1   | 80   |
| Tbg972.5.2760 | <i>T. brucei</i> | 141 | 91  | 231  |
| Tbg972.5.2760 | <i>T. brucei</i> | 58  | 306 | 363  |
| Tbg972.5.2790 | <i>T. brucei</i> | 75  | 1   | 75   |
| Tbg972.5.280  | <i>T. brucei</i> | 46  | 93  | 138  |
| Tbg972.5.280  | <i>T. brucei</i> | 168 | 293 | 460  |
| Tbg972.5.2800 | <i>T. brucei</i> | 111 | 1   | 111  |
| Tbg972.5.2800 | <i>T. brucei</i> | 79  | 120 | 198  |
| Tbg972.5.2810 | <i>T. brucei</i> | 113 | 1   | 113  |
| Tbg972.5.2810 | <i>T. brucei</i> | 57  | 123 | 179  |
| Tbg972.5.2810 | <i>T. brucei</i> | 57  | 123 | 179  |
| Tbg972.5.2850 | <i>T. brucei</i> | 41  | 459 | 499  |
| Tbg972.5.2850 | <i>T. brucei</i> | 40  | 531 | 570  |
| Tbg972.5.2850 | <i>T. brucei</i> | 40  | 531 | 570  |
| Tbg972.5.2860 | <i>T. brucei</i> | 48  | 29  | 76   |
| Tbg972.5.2870 | <i>T. brucei</i> | 85  | 319 | 403  |
| Tbg972.5.2890 | <i>T. brucei</i> | 40  | 66  | 105  |
| Tbg972.5.2890 | <i>T. brucei</i> | 177 | 150 | 326  |
| Tbg972.5.2890 | <i>T. brucei</i> | 177 | 150 | 326  |
| Tbg972.5.290  | <i>T. brucei</i> | 179 | 283 | 461  |

|               |                  |     |      |      |
|---------------|------------------|-----|------|------|
| Tbg972.5.2900 | <i>T. brucei</i> | 50  | 270  | 319  |
| Tbg972.5.2910 | <i>T. brucei</i> | 278 | 109  | 386  |
| Tbg972.5.2910 | <i>T. brucei</i> | 68  | 396  | 463  |
| Tbg972.5.2910 | <i>T. brucei</i> | 87  | 542  | 628  |
| Tbg972.5.2920 | <i>T. brucei</i> | 43  | 112  | 154  |
| Tbg972.5.2920 | <i>T. brucei</i> | 53  | 267  | 319  |
| Tbg972.5.2920 | <i>T. brucei</i> | 65  | 450  | 514  |
| Tbg972.5.2930 | <i>T. brucei</i> | 42  | 450  | 491  |
| Tbg972.5.2950 | <i>T. brucei</i> | 43  | 72   | 114  |
| Tbg972.5.2970 | <i>T. brucei</i> | 283 | 364  | 646  |
| Tbg972.5.2970 | <i>T. brucei</i> | 370 | 719  | 1088 |
| Tbg972.5.2980 | <i>T. brucei</i> | 232 | 18   | 249  |
| Tbg972.5.2980 | <i>T. brucei</i> | 46  | 264  | 309  |
| Tbg972.5.2980 | <i>T. brucei</i> | 50  | 362  | 411  |
| Tbg972.5.2990 | <i>T. brucei</i> | 182 | 1    | 182  |
| Tbg972.5.30   | <i>T. brucei</i> | 47  | 1    | 47   |
| Tbg972.5.300  | <i>T. brucei</i> | 181 | 281  | 461  |
| Tbg972.5.3010 | <i>T. brucei</i> | 213 | 139  | 351  |
| Tbg972.5.3020 | <i>T. brucei</i> | 47  | 1    | 47   |
| Tbg972.5.3030 | <i>T. brucei</i> | 40  | 122  | 161  |
| Tbg972.5.3050 | <i>T. brucei</i> | 126 | 395  | 520  |
| Tbg972.5.3080 | <i>T. brucei</i> | 135 | 37   | 171  |
| Tbg972.5.3090 | <i>T. brucei</i> | 100 | 1    | 100  |
| Tbg972.5.310  | <i>T. brucei</i> | 179 | 283  | 461  |
| Tbg972.5.3100 | <i>T. brucei</i> | 64  | 71   | 134  |
| Tbg972.5.3100 | <i>T. brucei</i> | 70  | 186  | 255  |
| Tbg972.5.3100 | <i>T. brucei</i> | 71  | 296  | 366  |
| Tbg972.5.3110 | <i>T. brucei</i> | 85  | 438  | 522  |
| Tbg972.5.3140 | <i>T. brucei</i> | 83  | 52   | 134  |
| Tbg972.5.3180 | <i>T. brucei</i> | 43  | 265  | 307  |
| Tbg972.5.3190 | <i>T. brucei</i> | 83  | 52   | 134  |
| Tbg972.5.320  | <i>T. brucei</i> | 181 | 281  | 461  |
| Tbg972.5.3200 | <i>T. brucei</i> | 69  | 410  | 478  |
| Tbg972.5.3230 | <i>T. brucei</i> | 79  | 103  | 181  |
| Tbg972.5.3240 | <i>T. brucei</i> | 116 | 1    | 116  |
| Tbg972.5.3240 | <i>T. brucei</i> | 145 | 243  | 387  |
| Tbg972.5.3240 | <i>T. brucei</i> | 90  | 395  | 484  |
| Tbg972.5.3240 | <i>T. brucei</i> | 76  | 502  | 577  |
| Tbg972.5.3260 | <i>T. brucei</i> | 53  | 579  | 631  |
| Tbg972.5.330  | <i>T. brucei</i> | 179 | 283  | 461  |
| Tbg972.5.3300 | <i>T. brucei</i> | 68  | 14   | 81   |
| Tbg972.5.3300 | <i>T. brucei</i> | 77  | 107  | 183  |
| Tbg972.5.3300 | <i>T. brucei</i> | 60  | 476  | 535  |
| Tbg972.5.3300 | <i>T. brucei</i> | 123 | 692  | 814  |
| Tbg972.5.3300 | <i>T. brucei</i> | 46  | 1228 | 1273 |
| Tbg972.5.3300 | <i>T. brucei</i> | 137 | 2079 | 2215 |
| Tbg972.5.3300 | <i>T. brucei</i> | 53  | 2235 | 2287 |

|               |                  |     |      |      |
|---------------|------------------|-----|------|------|
| Tbg972.5.3300 | <i>T. brucei</i> | 64  | 2813 | 2876 |
| Tbg972.5.3300 | <i>T. brucei</i> | 61  | 3050 | 3110 |
| Tbg972.5.3300 | <i>T. brucei</i> | 48  | 3253 | 3300 |
| Tbg972.5.3300 | <i>T. brucei</i> | 68  | 3362 | 3429 |
| Tbg972.5.3300 | <i>T. brucei</i> | 60  | 3739 | 3798 |
| Tbg972.5.3300 | <i>T. brucei</i> | 68  | 3826 | 3893 |
| Tbg972.5.3300 | <i>T. brucei</i> | 53  | 3990 | 4042 |
| Tbg972.5.3300 | <i>T. brucei</i> | 58  | 4106 | 4163 |
| Tbg972.5.3300 | <i>T. brucei</i> | 52  | 4175 | 4226 |
| Tbg972.5.3300 | <i>T. brucei</i> | 67  | 4307 | 4373 |
| Tbg972.5.3310 | <i>T. brucei</i> | 73  | 1    | 73   |
| Tbg972.5.3310 | <i>T. brucei</i> | 76  | 237  | 312  |
| Tbg972.5.3320 | <i>T. brucei</i> | 45  | 157  | 201  |
| Tbg972.5.3330 | <i>T. brucei</i> | 410 | 1    | 410  |
| Tbg972.5.3330 | <i>T. brucei</i> | 44  | 710  | 753  |
| Tbg972.5.3380 | <i>T. brucei</i> | 129 | 1    | 129  |
| Tbg972.5.3390 | <i>T. brucei</i> | 43  | 77   | 119  |
| Tbg972.5.3400 | <i>T. brucei</i> | 192 | 1    | 192  |
| Tbg972.5.3400 | <i>T. brucei</i> | 227 | 204  | 430  |
| Tbg972.5.3400 | <i>T. brucei</i> | 43  | 485  | 527  |
| Tbg972.5.3400 | <i>T. brucei</i> | 50  | 586  | 635  |
| Tbg972.5.3400 | <i>T. brucei</i> | 43  | 677  | 719  |
| Tbg972.5.3400 | <i>T. brucei</i> | 92  | 864  | 955  |
| Tbg972.5.3420 | <i>T. brucei</i> | 49  | 182  | 230  |
| Tbg972.5.3420 | <i>T. brucei</i> | 68  | 355  | 422  |
| Tbg972.5.3420 | <i>T. brucei</i> | 158 | 1140 | 1297 |
| Tbg972.5.3440 | <i>T. brucei</i> | 49  | 128  | 176  |
| Tbg972.5.3440 | <i>T. brucei</i> | 57  | 320  | 376  |
| Tbg972.5.3440 | <i>T. brucei</i> | 57  | 320  | 376  |
| Tbg972.5.3450 | <i>T. brucei</i> | 58  | 467  | 524  |
| Tbg972.5.3470 | <i>T. brucei</i> | 85  | 106  | 190  |
| Tbg972.5.3470 | <i>T. brucei</i> | 476 | 192  | 667  |
| Tbg972.5.3470 | <i>T. brucei</i> | 81  | 679  | 759  |
| Tbg972.5.3470 | <i>T. brucei</i> | 148 | 777  | 924  |
| Tbg972.5.3470 | <i>T. brucei</i> | 40  | 983  | 1022 |
| Tbg972.5.3470 | <i>T. brucei</i> | 152 | 1026 | 1177 |
| Tbg972.5.3480 | <i>T. brucei</i> | 75  | 330  | 404  |
| Tbg972.5.3480 | <i>T. brucei</i> | 46  | 463  | 508  |
| Tbg972.5.3480 | <i>T. brucei</i> | 46  | 463  | 508  |
| Tbg972.5.3490 | <i>T. brucei</i> | 74  | 153  | 226  |
| Tbg972.5.3490 | <i>T. brucei</i> | 96  | 251  | 346  |
| Tbg972.5.3490 | <i>T. brucei</i> | 46  | 447  | 492  |
| Tbg972.5.350  | <i>T. brucei</i> | 51  | 10   | 60   |
| Tbg972.5.350  | <i>T. brucei</i> | 168 | 215  | 382  |
| Tbg972.5.3500 | <i>T. brucei</i> | 44  | 144  | 187  |
| Tbg972.5.3500 | <i>T. brucei</i> | 130 | 267  | 396  |
| Tbg972.5.3510 | <i>T. brucei</i> | 47  | 26   | 72   |

|               |                  |     |      |      |
|---------------|------------------|-----|------|------|
| Tbg972.5.3510 | <i>T. brucei</i> | 89  | 88   | 176  |
| Tbg972.5.3510 | <i>T. brucei</i> | 114 | 202  | 315  |
| Tbg972.5.3520 | <i>T. brucei</i> | 67  | 1    | 67   |
| Tbg972.5.3530 | <i>T. brucei</i> | 57  | 1    | 57   |
| Tbg972.5.3540 | <i>T. brucei</i> | 139 | 1    | 139  |
| Tbg972.5.3540 | <i>T. brucei</i> | 70  | 163  | 232  |
| Tbg972.5.3540 | <i>T. brucei</i> | 436 | 260  | 695  |
| Tbg972.5.3550 | <i>T. brucei</i> | 43  | 236  | 278  |
| Tbg972.5.3550 | <i>T. brucei</i> | 101 | 424  | 524  |
| Tbg972.5.3550 | <i>T. brucei</i> | 58  | 735  | 792  |
| Tbg972.5.3550 | <i>T. brucei</i> | 43  | 1312 | 1354 |
| Tbg972.5.3560 | <i>T. brucei</i> | 49  | 253  | 301  |
| Tbg972.5.3560 | <i>T. brucei</i> | 75  | 661  | 735  |
| Tbg972.5.3580 | <i>T. brucei</i> | 40  | 953  | 992  |
| Tbg972.5.3590 | <i>T. brucei</i> | 61  | 240  | 300  |
| Tbg972.5.3590 | <i>T. brucei</i> | 77  | 321  | 397  |
| Tbg972.5.360  | <i>T. brucei</i> | 78  | 281  | 358  |
| Tbg972.5.3620 | <i>T. brucei</i> | 100 | 597  | 696  |
| Tbg972.5.3630 | <i>T. brucei</i> | 95  | 130  | 224  |
| Tbg972.5.3640 | <i>T. brucei</i> | 54  | 1    | 54   |
| Tbg972.5.3650 | <i>T. brucei</i> | 62  | 158  | 219  |
| Tbg972.5.3650 | <i>T. brucei</i> | 42  | 476  | 517  |
| Tbg972.5.3650 | <i>T. brucei</i> | 42  | 476  | 517  |
| Tbg972.5.3660 | <i>T. brucei</i> | 89  | 158  | 246  |
| Tbg972.5.3670 | <i>T. brucei</i> | 281 | 1    | 281  |
| Tbg972.5.370  | <i>T. brucei</i> | 95  | 1    | 95   |
| Tbg972.5.3730 | <i>T. brucei</i> | 53  | 240  | 292  |
| Tbg972.5.3740 | <i>T. brucei</i> | 68  | 227  | 294  |
| Tbg972.5.3740 | <i>T. brucei</i> | 378 | 483  | 860  |
| Tbg972.5.3760 | <i>T. brucei</i> | 81  | 1    | 81   |
| Tbg972.5.3760 | <i>T. brucei</i> | 51  | 136  | 186  |
| Tbg972.5.3760 | <i>T. brucei</i> | 85  | 195  | 279  |
| Tbg972.5.3760 | <i>T. brucei</i> | 51  | 299  | 349  |
| Tbg972.5.3760 | <i>T. brucei</i> | 45  | 707  | 751  |
| Tbg972.5.380  | <i>T. brucei</i> | 58  | 64   | 121  |
| Tbg972.5.3800 | <i>T. brucei</i> | 246 | 1    | 246  |
| Tbg972.5.3800 | <i>T. brucei</i> | 73  | 356  | 428  |
| Tbg972.5.3800 | <i>T. brucei</i> | 151 | 514  | 664  |
| Tbg972.5.3800 | <i>T. brucei</i> | 40  | 720  | 759  |
| Tbg972.5.3800 | <i>T. brucei</i> | 61  | 780  | 840  |
| Tbg972.5.3810 | <i>T. brucei</i> | 65  | 1    | 65   |
| Tbg972.5.3810 | <i>T. brucei</i> | 40  | 432  | 471  |
| Tbg972.5.3830 | <i>T. brucei</i> | 212 | 130  | 341  |
| Tbg972.5.3840 | <i>T. brucei</i> | 57  | 121  | 177  |
| Tbg972.5.3890 | <i>T. brucei</i> | 63  | 1    | 63   |
| Tbg972.5.390  | <i>T. brucei</i> | 111 | 79   | 189  |
| Tbg972.5.390  | <i>T. brucei</i> | 56  | 284  | 339  |

|               |                  |     |      |      |
|---------------|------------------|-----|------|------|
| Tbg972.5.390  | <i>T. brucei</i> | 56  | 284  | 339  |
| Tbg972.5.3900 | <i>T. brucei</i> | 108 | 66   | 173  |
| Tbg972.5.3920 | <i>T. brucei</i> | 60  | 323  | 382  |
| Tbg972.5.3950 | <i>T. brucei</i> | 308 | 1    | 308  |
| Tbg972.5.3950 | <i>T. brucei</i> | 49  | 725  | 773  |
| Tbg972.5.3960 | <i>T. brucei</i> | 42  | 1002 | 1043 |
| Tbg972.5.3970 | <i>T. brucei</i> | 42  | 136  | 177  |
| Tbg972.5.3990 | <i>T. brucei</i> | 70  | 302  | 371  |
| Tbg972.5.3990 | <i>T. brucei</i> | 121 | 391  | 511  |
| Tbg972.5.3990 | <i>T. brucei</i> | 131 | 520  | 650  |
| Tbg972.5.3990 | <i>T. brucei</i> | 84  | 663  | 746  |
| Tbg972.5.3990 | <i>T. brucei</i> | 48  | 782  | 829  |
| Tbg972.5.3990 | <i>T. brucei</i> | 55  | 895  | 949  |
| Tbg972.5.40   | <i>T. brucei</i> | 56  | 231  | 286  |
| Tbg972.5.400  | <i>T. brucei</i> | 44  | 109  | 152  |
| Tbg972.5.400  | <i>T. brucei</i> | 64  | 255  | 318  |
| Tbg972.5.400  | <i>T. brucei</i> | 64  | 255  | 318  |
| Tbg972.5.4010 | <i>T. brucei</i> | 53  | 30   | 82   |
| Tbg972.5.4020 | <i>T. brucei</i> | 75  | 66   | 140  |
| Tbg972.5.4020 | <i>T. brucei</i> | 52  | 170  | 221  |
| Tbg972.5.4020 | <i>T. brucei</i> | 46  | 284  | 329  |
| Tbg972.5.4030 | <i>T. brucei</i> | 182 | 1    | 182  |
| Tbg972.5.4030 | <i>T. brucei</i> | 44  | 244  | 287  |
| Tbg972.5.4040 | <i>T. brucei</i> | 184 | 1    | 184  |
| Tbg972.5.4040 | <i>T. brucei</i> | 134 | 209  | 342  |
| Tbg972.5.4050 | <i>T. brucei</i> | 110 | 79   | 188  |
| Tbg972.5.4060 | <i>T. brucei</i> | 43  | 792  | 834  |
| Tbg972.5.4060 | <i>T. brucei</i> | 57  | 1445 | 1501 |
| Tbg972.5.4060 | <i>T. brucei</i> | 51  | 1824 | 1874 |
| Tbg972.5.4090 | <i>T. brucei</i> | 122 | 1    | 122  |
| Tbg972.5.410  | <i>T. brucei</i> | 121 | 1    | 121  |
| Tbg972.5.4100 | <i>T. brucei</i> | 62  | 93   | 154  |
| Tbg972.5.4110 | <i>T. brucei</i> | 75  | 224  | 298  |
| Tbg972.5.4110 | <i>T. brucei</i> | 62  | 370  | 431  |
| Tbg972.5.4110 | <i>T. brucei</i> | 62  | 370  | 431  |
| Tbg972.5.4120 | <i>T. brucei</i> | 44  | 56   | 99   |
| Tbg972.5.4120 | <i>T. brucei</i> | 70  | 301  | 370  |
| Tbg972.5.4120 | <i>T. brucei</i> | 70  | 301  | 370  |
| Tbg972.5.4130 | <i>T. brucei</i> | 63  | 181  | 243  |
| Tbg972.5.4130 | <i>T. brucei</i> | 45  | 334  | 378  |
| Tbg972.5.4130 | <i>T. brucei</i> | 56  | 455  | 510  |
| Tbg972.5.4140 | <i>T. brucei</i> | 54  | 44   | 97   |
| Tbg972.5.4170 | <i>T. brucei</i> | 229 | 339  | 567  |
| Tbg972.5.4170 | <i>T. brucei</i> | 43  | 631  | 673  |
| Tbg972.5.4170 | <i>T. brucei</i> | 76  | 711  | 786  |
| Tbg972.5.4180 | <i>T. brucei</i> | 73  | 255  | 327  |
| Tbg972.5.4180 | <i>T. brucei</i> | 42  | 476  | 517  |

|               |                  |     |      |      |
|---------------|------------------|-----|------|------|
| Tbg972.5.4180 | <i>T. brucei</i> | 48  | 678  | 725  |
| Tbg972.5.4190 | <i>T. brucei</i> | 173 | 1    | 173  |
| Tbg972.5.4190 | <i>T. brucei</i> | 73  | 182  | 254  |
| Tbg972.5.420  | <i>T. brucei</i> | 71  | 83   | 153  |
| Tbg972.5.420  | <i>T. brucei</i> | 69  | 258  | 326  |
| Tbg972.5.420  | <i>T. brucei</i> | 69  | 258  | 326  |
| Tbg972.5.4220 | <i>T. brucei</i> | 57  | 223  | 279  |
| Tbg972.5.4220 | <i>T. brucei</i> | 101 | 335  | 435  |
| Tbg972.5.4220 | <i>T. brucei</i> | 101 | 335  | 435  |
| Tbg972.5.4230 | <i>T. brucei</i> | 48  | 640  | 687  |
| Tbg972.5.4230 | <i>T. brucei</i> | 76  | 1077 | 1152 |
| Tbg972.5.4230 | <i>T. brucei</i> | 76  | 1077 | 1152 |
| Tbg972.5.4260 | <i>T. brucei</i> | 42  | 50   | 91   |
| Tbg972.5.4270 | <i>T. brucei</i> | 86  | 1    | 86   |
| Tbg972.5.4270 | <i>T. brucei</i> | 87  | 185  | 271  |
| Tbg972.5.4290 | <i>T. brucei</i> | 83  | 226  | 308  |
| Tbg972.5.4290 | <i>T. brucei</i> | 137 | 402  | 538  |
| Tbg972.5.430  | <i>T. brucei</i> | 40  | 37   | 76   |
| Tbg972.5.4300 | <i>T. brucei</i> | 52  | 197  | 248  |
| Tbg972.5.4300 | <i>T. brucei</i> | 70  | 265  | 334  |
| Tbg972.5.4320 | <i>T. brucei</i> | 57  | 51   | 107  |
| Tbg972.5.4330 | <i>T. brucei</i> | 60  | 195  | 254  |
| Tbg972.5.4350 | <i>T. brucei</i> | 79  | 1    | 79   |
| Tbg972.5.4350 | <i>T. brucei</i> | 47  | 108  | 154  |
| Tbg972.5.4370 | <i>T. brucei</i> | 121 | 1    | 121  |
| Tbg972.5.4370 | <i>T. brucei</i> | 87  | 151  | 237  |
| Tbg972.5.4370 | <i>T. brucei</i> | 120 | 247  | 366  |
| Tbg972.5.4380 | <i>T. brucei</i> | 49  | 1    | 49   |
| Tbg972.5.4380 | <i>T. brucei</i> | 69  | 148  | 216  |
| Tbg972.5.4390 | <i>T. brucei</i> | 58  | 650  | 707  |
| Tbg972.5.4390 | <i>T. brucei</i> | 207 | 838  | 1044 |
| Tbg972.5.4390 | <i>T. brucei</i> | 92  | 1160 | 1251 |
| Tbg972.5.4390 | <i>T. brucei</i> | 92  | 1275 | 1366 |
| Tbg972.5.4390 | <i>T. brucei</i> | 87  | 1403 | 1489 |
| Tbg972.5.4410 | <i>T. brucei</i> | 52  | 486  | 537  |
| Tbg972.5.4410 | <i>T. brucei</i> | 178 | 1204 | 1381 |
| Tbg972.5.4410 | <i>T. brucei</i> | 42  | 1383 | 1424 |
| Tbg972.5.4420 | <i>T. brucei</i> | 58  | 55   | 112  |
| Tbg972.5.4430 | <i>T. brucei</i> | 44  | 52   | 95   |
| Tbg972.5.4440 | <i>T. brucei</i> | 129 | 1    | 129  |
| Tbg972.5.4450 | <i>T. brucei</i> | 124 | 130  | 253  |
| Tbg972.5.4460 | <i>T. brucei</i> | 41  | 63   | 103  |
| Tbg972.5.4500 | <i>T. brucei</i> | 47  | 253  | 299  |
| Tbg972.5.4500 | <i>T. brucei</i> | 118 | 459  | 576  |
| Tbg972.5.4500 | <i>T. brucei</i> | 77  | 1500 | 1576 |
| Tbg972.5.4500 | <i>T. brucei</i> | 81  | 1634 | 1714 |
| Tbg972.5.4500 | <i>T. brucei</i> | 50  | 2106 | 2155 |



|               |                  |     |      |      |
|---------------|------------------|-----|------|------|
| Tbg972.5.4510 | <i>T. brucei</i> | 173 | 58   | 230  |
| Tbg972.5.4510 | <i>T. brucei</i> | 60  | 293  | 352  |
| Tbg972.5.4510 | <i>T. brucei</i> | 83  | 390  | 472  |
| Tbg972.5.4510 | <i>T. brucei</i> | 111 | 549  | 659  |
| Tbg972.5.4510 | <i>T. brucei</i> | 54  | 744  | 797  |
| Tbg972.5.4520 | <i>T. brucei</i> | 128 | 91   | 218  |
| Tbg972.5.4520 | <i>T. brucei</i> | 315 | 424  | 738  |
| Tbg972.5.4520 | <i>T. brucei</i> | 63  | 801  | 863  |
| Tbg972.5.4520 | <i>T. brucei</i> | 49  | 905  | 953  |
| Tbg972.5.4520 | <i>T. brucei</i> | 75  | 1038 | 1112 |
| Tbg972.5.4520 | <i>T. brucei</i> | 73  | 1232 | 1304 |
| Tbg972.5.4520 | <i>T. brucei</i> | 82  | 1439 | 1520 |
| Tbg972.5.4540 | <i>T. brucei</i> | 41  | 36   | 76   |
| Tbg972.5.4540 | <i>T. brucei</i> | 45  | 1219 | 1263 |
| Tbg972.5.4540 | <i>T. brucei</i> | 45  | 1219 | 1263 |
| Tbg972.5.4550 | <i>T. brucei</i> | 67  | 77   | 143  |
| Tbg972.5.4550 | <i>T. brucei</i> | 152 | 188  | 339  |
| Tbg972.5.4550 | <i>T. brucei</i> | 51  | 422  | 472  |
| Tbg972.5.4550 | <i>T. brucei</i> | 40  | 567  | 606  |
| Tbg972.5.4560 | <i>T. brucei</i> | 141 | 1    | 141  |
| Tbg972.5.4560 | <i>T. brucei</i> | 84  | 188  | 271  |
| Tbg972.5.4560 | <i>T. brucei</i> | 47  | 435  | 481  |
| Tbg972.5.4560 | <i>T. brucei</i> | 96  | 491  | 586  |
| Tbg972.5.4560 | <i>T. brucei</i> | 134 | 601  | 734  |
| Tbg972.5.4560 | <i>T. brucei</i> | 51  | 847  | 897  |
| Tbg972.5.4560 | <i>T. brucei</i> | 185 | 988  | 1172 |
| Tbg972.5.4610 | <i>T. brucei</i> | 369 | 1    | 369  |
| Tbg972.5.4610 | <i>T. brucei</i> | 54  | 509  | 562  |
| Tbg972.5.4610 | <i>T. brucei</i> | 79  | 675  | 753  |
| Tbg972.5.4610 | <i>T. brucei</i> | 126 | 793  | 918  |
| Tbg972.5.4610 | <i>T. brucei</i> | 177 | 1013 | 1189 |
| Tbg972.5.4630 | <i>T. brucei</i> | 99  | 1    | 99   |
| Tbg972.5.4650 | <i>T. brucei</i> | 76  | 95   | 170  |
| Tbg972.5.4650 | <i>T. brucei</i> | 42  | 198  | 239  |
| Tbg972.5.4650 | <i>T. brucei</i> | 42  | 198  | 239  |
| Tbg972.5.4660 | <i>T. brucei</i> | 83  | 1    | 83   |
| Tbg972.5.4660 | <i>T. brucei</i> | 93  | 870  | 962  |
| Tbg972.5.4680 | <i>T. brucei</i> | 53  | 605  | 657  |
| Tbg972.5.4680 | <i>T. brucei</i> | 51  | 998  | 1048 |
| Tbg972.5.4680 | <i>T. brucei</i> | 45  | 2079 | 2123 |
| Tbg972.5.4680 | <i>T. brucei</i> | 41  | 4465 | 4505 |
| Tbg972.5.470  | <i>T. brucei</i> | 121 | 196  | 316  |
| Tbg972.5.4740 | <i>T. brucei</i> | 174 | 70   | 243  |
| Tbg972.5.4740 | <i>T. brucei</i> | 119 | 311  | 429  |
| Tbg972.5.4740 | <i>T. brucei</i> | 63  | 504  | 566  |
| Tbg972.5.4750 | <i>T. brucei</i> | 463 | 144  | 606  |
| Tbg972.5.4760 | <i>T. brucei</i> | 50  | 44   | 93   |

|               |                  |     |     |      |
|---------------|------------------|-----|-----|------|
| Tbg972.5.4790 | <i>T. brucei</i> | 40  | 1   | 40   |
| Tbg972.5.4790 | <i>T. brucei</i> | 90  | 174 | 263  |
| Tbg972.5.4790 | <i>T. brucei</i> | 90  | 174 | 263  |
| Tbg972.5.480  | <i>T. brucei</i> | 208 | 1   | 208  |
| Tbg972.5.4820 | <i>T. brucei</i> | 64  | 217 | 280  |
| Tbg972.5.4830 | <i>T. brucei</i> | 64  | 464 | 527  |
| Tbg972.5.4840 | <i>T. brucei</i> | 56  | 55  | 110  |
| Tbg972.5.4840 | <i>T. brucei</i> | 132 | 193 | 324  |
| Tbg972.5.4840 | <i>T. brucei</i> | 135 | 353 | 487  |
| Tbg972.5.4850 | <i>T. brucei</i> | 53  | 1   | 53   |
| Tbg972.5.4850 | <i>T. brucei</i> | 229 | 120 | 348  |
| Tbg972.5.4860 | <i>T. brucei</i> | 67  | 96  | 162  |
| Tbg972.5.4860 | <i>T. brucei</i> | 44  | 197 | 240  |
| Tbg972.5.4860 | <i>T. brucei</i> | 46  | 371 | 416  |
| Tbg972.5.4860 | <i>T. brucei</i> | 75  | 447 | 521  |
| Tbg972.5.4890 | <i>T. brucei</i> | 66  | 1   | 66   |
| Tbg972.5.4900 | <i>T. brucei</i> | 304 | 172 | 475  |
| Tbg972.5.4900 | <i>T. brucei</i> | 47  | 716 | 762  |
| Tbg972.5.4900 | <i>T. brucei</i> | 55  | 780 | 834  |
| Tbg972.5.4900 | <i>T. brucei</i> | 80  | 841 | 920  |
| Tbg972.5.4990 | <i>T. brucei</i> | 58  | 54  | 111  |
| Tbg972.5.4990 | <i>T. brucei</i> | 49  | 225 | 273  |
| Tbg972.5.4990 | <i>T. brucei</i> | 49  | 225 | 273  |
| Tbg972.5.500  | <i>T. brucei</i> | 48  | 124 | 171  |
| Tbg972.5.500  | <i>T. brucei</i> | 40  | 213 | 252  |
| Tbg972.5.500  | <i>T. brucei</i> | 46  | 412 | 457  |
| Tbg972.5.500  | <i>T. brucei</i> | 123 | 562 | 684  |
| Tbg972.5.500  | <i>T. brucei</i> | 104 | 822 | 925  |
| Tbg972.5.5010 | <i>T. brucei</i> | 78  | 77  | 154  |
| Tbg972.5.5010 | <i>T. brucei</i> | 44  | 285 | 328  |
| Tbg972.5.5020 | <i>T. brucei</i> | 254 | 1   | 254  |
| Tbg972.5.5020 | <i>T. brucei</i> | 42  | 281 | 322  |
| Tbg972.5.5020 | <i>T. brucei</i> | 148 | 680 | 827  |
| Tbg972.5.5040 | <i>T. brucei</i> | 44  | 648 | 691  |
| Tbg972.5.5040 | <i>T. brucei</i> | 62  | 763 | 824  |
| Tbg972.5.5040 | <i>T. brucei</i> | 125 | 876 | 1000 |
| Tbg972.5.5050 | <i>T. brucei</i> | 41  | 47  | 87   |
| Tbg972.5.5050 | <i>T. brucei</i> | 73  | 159 | 231  |
| Tbg972.5.5050 | <i>T. brucei</i> | 73  | 159 | 231  |
| Tbg972.5.5060 | <i>T. brucei</i> | 60  | 26  | 85   |
| Tbg972.5.5080 | <i>T. brucei</i> | 49  | 18  | 66   |
| Tbg972.5.5080 | <i>T. brucei</i> | 88  | 203 | 290  |
| Tbg972.5.5080 | <i>T. brucei</i> | 72  | 340 | 411  |
| Tbg972.5.510  | <i>T. brucei</i> | 99  | 1   | 99   |
| Tbg972.5.510  | <i>T. brucei</i> | 58  | 216 | 273  |
| Tbg972.5.510  | <i>T. brucei</i> | 79  | 308 | 386  |
| Tbg972.5.510  | <i>T. brucei</i> | 54  | 518 | 571  |

|               |                  |     |      |      |
|---------------|------------------|-----|------|------|
| Tbg972.5.510  | <i>T. brucei</i> | 56  | 674  | 729  |
| Tbg972.5.510  | <i>T. brucei</i> | 40  | 737  | 776  |
| Tbg972.5.510  | <i>T. brucei</i> | 45  | 882  | 926  |
| Tbg972.5.510  | <i>T. brucei</i> | 116 | 1060 | 1175 |
| Tbg972.5.510  | <i>T. brucei</i> | 41  | 1211 | 1251 |
| Tbg972.5.5100 | <i>T. brucei</i> | 83  | 1    | 83   |
| Tbg972.5.5100 | <i>T. brucei</i> | 183 | 149  | 331  |
| Tbg972.5.5100 | <i>T. brucei</i> | 76  | 346  | 421  |
| Tbg972.5.5100 | <i>T. brucei</i> | 55  | 458  | 512  |
| Tbg972.5.5100 | <i>T. brucei</i> | 265 | 540  | 804  |
| Tbg972.5.5110 | <i>T. brucei</i> | 63  | 30   | 92   |
| Tbg972.5.5110 | <i>T. brucei</i> | 50  | 210  | 259  |
| Tbg972.5.5110 | <i>T. brucei</i> | 50  | 210  | 259  |
| Tbg972.5.5120 | <i>T. brucei</i> | 64  | 290  | 353  |
| Tbg972.5.5120 | <i>T. brucei</i> | 57  | 501  | 557  |
| Tbg972.5.5120 | <i>T. brucei</i> | 125 | 671  | 795  |
| Tbg972.5.5120 | <i>T. brucei</i> | 53  | 888  | 940  |
| Tbg972.5.5120 | <i>T. brucei</i> | 45  | 963  | 1007 |
| Tbg972.5.5150 | <i>T. brucei</i> | 51  | 24   | 74   |
| Tbg972.5.5160 | <i>T. brucei</i> | 47  | 229  | 275  |
| Tbg972.5.5170 | <i>T. brucei</i> | 85  | 316  | 400  |
| Tbg972.5.5190 | <i>T. brucei</i> | 490 | 1    | 490  |
| Tbg972.5.520  | <i>T. brucei</i> | 53  | 1    | 53   |
| Tbg972.5.5200 | <i>T. brucei</i> | 49  | 63   | 111  |
| Tbg972.5.5220 | <i>T. brucei</i> | 54  | 295  | 348  |
| Tbg972.5.5220 | <i>T. brucei</i> | 51  | 354  | 404  |
| Tbg972.5.5220 | <i>T. brucei</i> | 51  | 354  | 404  |
| Tbg972.5.5230 | <i>T. brucei</i> | 57  | 1    | 57   |
| Tbg972.5.5230 | <i>T. brucei</i> | 51  | 84   | 134  |
| Tbg972.5.5230 | <i>T. brucei</i> | 51  | 84   | 134  |
| Tbg972.5.5240 | <i>T. brucei</i> | 63  | 217  | 279  |
| Tbg972.5.5250 | <i>T. brucei</i> | 87  | 204  | 290  |
| Tbg972.5.530  | <i>T. brucei</i> | 55  | 1    | 55   |
| Tbg972.5.5330 | <i>T. brucei</i> | 79  | 372  | 450  |
| Tbg972.5.5330 | <i>T. brucei</i> | 102 | 458  | 559  |
| Tbg972.5.5350 | <i>T. brucei</i> | 54  | 1    | 54   |
| Tbg972.5.5350 | <i>T. brucei</i> | 71  | 439  | 509  |
| Tbg972.5.5350 | <i>T. brucei</i> | 182 | 710  | 891  |
| Tbg972.5.5360 | <i>T. brucei</i> | 101 | 1    | 101  |
| Tbg972.5.5380 | <i>T. brucei</i> | 86  | 51   | 136  |
| Tbg972.5.5390 | <i>T. brucei</i> | 58  | 1    | 58   |
| Tbg972.5.5390 | <i>T. brucei</i> | 89  | 186  | 274  |
| Tbg972.5.5390 | <i>T. brucei</i> | 89  | 186  | 274  |
| Tbg972.5.540  | <i>T. brucei</i> | 173 | 1    | 173  |
| Tbg972.5.540  | <i>T. brucei</i> | 64  | 331  | 394  |
| Tbg972.5.540  | <i>T. brucei</i> | 58  | 474  | 531  |
| Tbg972.5.5410 | <i>T. brucei</i> | 88  | 1    | 88   |

|               |                  |     |      |      |
|---------------|------------------|-----|------|------|
| Tbg972.5.5410 | <i>T. brucei</i> | 77  | 389  | 465  |
| Tbg972.5.5410 | <i>T. brucei</i> | 51  | 555  | 605  |
| Tbg972.5.5410 | <i>T. brucei</i> | 91  | 654  | 744  |
| Tbg972.5.5430 | <i>T. brucei</i> | 53  | 76   | 128  |
| Tbg972.5.5440 | <i>T. brucei</i> | 49  | 1    | 49   |
| Tbg972.5.5450 | <i>T. brucei</i> | 66  | 190  | 255  |
| Tbg972.5.5450 | <i>T. brucei</i> | 43  | 298  | 340  |
| Tbg972.5.5450 | <i>T. brucei</i> | 63  | 550  | 612  |
| Tbg972.5.550  | <i>T. brucei</i> | 56  | 87   | 142  |
| Tbg972.5.550  | <i>T. brucei</i> | 40  | 234  | 273  |
| Tbg972.5.550  | <i>T. brucei</i> | 40  | 316  | 355  |
| Tbg972.5.5500 | <i>T. brucei</i> | 50  | 70   | 119  |
| Tbg972.5.5520 | <i>T. brucei</i> | 43  | 29   | 71   |
| Tbg972.5.5530 | <i>T. brucei</i> | 42  | 272  | 313  |
| Tbg972.5.5530 | <i>T. brucei</i> | 110 | 350  | 459  |
| Tbg972.5.5530 | <i>T. brucei</i> | 110 | 350  | 459  |
| Tbg972.5.5550 | <i>T. brucei</i> | 164 | 118  | 281  |
| Tbg972.5.5560 | <i>T. brucei</i> | 79  | 44   | 122  |
| Tbg972.5.5560 | <i>T. brucei</i> | 73  | 189  | 261  |
| Tbg972.5.5580 | <i>T. brucei</i> | 70  | 106  | 175  |
| Tbg972.5.5580 | <i>T. brucei</i> | 77  | 653  | 729  |
| Tbg972.5.5580 | <i>T. brucei</i> | 77  | 653  | 729  |
| Tbg972.5.5610 | <i>T. brucei</i> | 53  | 53   | 105  |
| Tbg972.5.5620 | <i>T. brucei</i> | 46  | 249  | 294  |
| Tbg972.5.5630 | <i>T. brucei</i> | 95  | 112  | 206  |
| Tbg972.5.5640 | <i>T. brucei</i> | 117 | 39   | 155  |
| Tbg972.5.5650 | <i>T. brucei</i> | 60  | 210  | 269  |
| Tbg972.5.5650 | <i>T. brucei</i> | 206 | 317  | 522  |
| Tbg972.5.5650 | <i>T. brucei</i> | 62  | 800  | 861  |
| Tbg972.5.5660 | <i>T. brucei</i> | 111 | 44   | 154  |
| Tbg972.5.5670 | <i>T. brucei</i> | 42  | 113  | 154  |
| Tbg972.5.5670 | <i>T. brucei</i> | 44  | 1000 | 1043 |
| Tbg972.5.5670 | <i>T. brucei</i> | 44  | 1000 | 1043 |
| Tbg972.5.5690 | <i>T. brucei</i> | 120 | 71   | 190  |
| Tbg972.5.5690 | <i>T. brucei</i> | 71  | 316  | 386  |
| Tbg972.5.5690 | <i>T. brucei</i> | 71  | 316  | 386  |
| Tbg972.5.570  | <i>T. brucei</i> | 48  | 275  | 322  |
| Tbg972.5.5700 | <i>T. brucei</i> | 57  | 42   | 98   |
| Tbg972.5.5710 | <i>T. brucei</i> | 92  | 1    | 92   |
| Tbg972.5.5720 | <i>T. brucei</i> | 92  | 1    | 92   |
| Tbg972.5.5730 | <i>T. brucei</i> | 58  | 35   | 92   |
| Tbg972.5.5740 | <i>T. brucei</i> | 92  | 1    | 92   |
| Tbg972.5.5750 | <i>T. brucei</i> | 92  | 1    | 92   |
| Tbg972.5.5760 | <i>T. brucei</i> | 54  | 1    | 54   |
| Tbg972.5.5770 | <i>T. brucei</i> | 59  | 1    | 59   |
| Tbg972.5.5770 | <i>T. brucei</i> | 85  | 526  | 610  |
| Tbg972.5.5770 | <i>T. brucei</i> | 192 | 636  | 827  |

|               |                  |     |      |      |
|---------------|------------------|-----|------|------|
| Tbg972.5.5790 | <i>T. brucei</i> | 62  | 1    | 62   |
| Tbg972.5.580  | <i>T. brucei</i> | 65  | 76   | 140  |
| Tbg972.5.580  | <i>T. brucei</i> | 58  | 206  | 263  |
| Tbg972.5.580  | <i>T. brucei</i> | 43  | 284  | 326  |
| Tbg972.5.580  | <i>T. brucei</i> | 82  | 412  | 493  |
| Tbg972.5.5800 | <i>T. brucei</i> | 40  | 1    | 40   |
| Tbg972.5.5810 | <i>T. brucei</i> | 96  | 225  | 320  |
| Tbg972.5.5810 | <i>T. brucei</i> | 45  | 428  | 472  |
| Tbg972.5.5810 | <i>T. brucei</i> | 45  | 428  | 472  |
| Tbg972.5.5820 | <i>T. brucei</i> | 53  | 1    | 53   |
| Tbg972.5.5820 | <i>T. brucei</i> | 145 | 249  | 393  |
| Tbg972.5.5820 | <i>T. brucei</i> | 79  | 602  | 680  |
| Tbg972.5.5820 | <i>T. brucei</i> | 54  | 761  | 814  |
| Tbg972.5.5830 | <i>T. brucei</i> | 45  | 74   | 118  |
| Tbg972.5.5840 | <i>T. brucei</i> | 51  | 124  | 174  |
| Tbg972.5.5840 | <i>T. brucei</i> | 104 | 179  | 282  |
| Tbg972.5.5870 | <i>T. brucei</i> | 44  | 37   | 80   |
| Tbg972.5.5870 | <i>T. brucei</i> | 240 | 107  | 346  |
| Tbg972.5.5870 | <i>T. brucei</i> | 211 | 394  | 604  |
| Tbg972.5.5910 | <i>T. brucei</i> | 82  | 1    | 82   |
| Tbg972.5.5910 | <i>T. brucei</i> | 53  | 88   | 140  |
| Tbg972.5.5940 | <i>T. brucei</i> | 50  | 383  | 432  |
| Tbg972.5.5950 | <i>T. brucei</i> | 126 | 1    | 126  |
| Tbg972.5.5950 | <i>T. brucei</i> | 48  | 171  | 218  |
| Tbg972.5.5950 | <i>T. brucei</i> | 48  | 171  | 218  |
| Tbg972.5.5960 | <i>T. brucei</i> | 51  | 1    | 51   |
| Tbg972.5.5960 | <i>T. brucei</i> | 61  | 572  | 632  |
| Tbg972.5.5990 | <i>T. brucei</i> | 115 | 1    | 115  |
| Tbg972.5.600  | <i>T. brucei</i> | 52  | 172  | 223  |
| Tbg972.5.600  | <i>T. brucei</i> | 65  | 357  | 421  |
| Tbg972.5.600  | <i>T. brucei</i> | 68  | 584  | 651  |
| Tbg972.5.600  | <i>T. brucei</i> | 93  | 779  | 871  |
| Tbg972.5.600  | <i>T. brucei</i> | 59  | 906  | 964  |
| Tbg972.5.600  | <i>T. brucei</i> | 53  | 1046 | 1098 |
| Tbg972.5.600  | <i>T. brucei</i> | 63  | 1395 | 1457 |
| Tbg972.5.600  | <i>T. brucei</i> | 127 | 1473 | 1599 |
| Tbg972.5.600  | <i>T. brucei</i> | 288 | 1604 | 1891 |
| Tbg972.5.600  | <i>T. brucei</i> | 191 | 1911 | 2101 |
| Tbg972.5.6000 | <i>T. brucei</i> | 138 | 624  | 761  |
| Tbg972.5.6010 | <i>T. brucei</i> | 240 | 43   | 282  |
| Tbg972.5.6010 | <i>T. brucei</i> | 88  | 758  | 845  |
| Tbg972.5.6010 | <i>T. brucei</i> | 88  | 758  | 845  |
| Tbg972.5.6020 | <i>T. brucei</i> | 286 | 1    | 286  |
| Tbg972.5.6020 | <i>T. brucei</i> | 167 | 290  | 456  |
| Tbg972.5.6020 | <i>T. brucei</i> | 78  | 502  | 579  |
| Tbg972.5.6050 | <i>T. brucei</i> | 43  | 97   | 139  |
| Tbg972.5.6060 | <i>T. brucei</i> | 201 | 1    | 201  |

|               |                  |     |      |      |
|---------------|------------------|-----|------|------|
| Tbg972.5.6060 | <i>T. brucei</i> | 188 | 223  | 410  |
| Tbg972.5.6060 | <i>T. brucei</i> | 42  | 443  | 484  |
| Tbg972.5.6060 | <i>T. brucei</i> | 96  | 536  | 631  |
| Tbg972.5.6060 | <i>T. brucei</i> | 147 | 698  | 844  |
| Tbg972.5.6080 | <i>T. brucei</i> | 149 | 1    | 149  |
| Tbg972.5.610  | <i>T. brucei</i> | 59  | 1    | 59   |
| Tbg972.5.610  | <i>T. brucei</i> | 42  | 94   | 135  |
| Tbg972.5.610  | <i>T. brucei</i> | 42  | 94   | 135  |
| Tbg972.5.6150 | <i>T. brucei</i> | 63  | 368  | 430  |
| Tbg972.5.6160 | <i>T. brucei</i> | 106 | 349  | 454  |
| Tbg972.5.6180 | <i>T. brucei</i> | 106 | 594  | 699  |
| Tbg972.5.620  | <i>T. brucei</i> | 63  | 1    | 63   |
| Tbg972.5.6230 | <i>T. brucei</i> | 190 | 140  | 329  |
| Tbg972.5.6240 | <i>T. brucei</i> | 148 | 1    | 148  |
| Tbg972.5.6280 | <i>T. brucei</i> | 101 | 1    | 101  |
| Tbg972.5.6290 | <i>T. brucei</i> | 66  | 1    | 66   |
| Tbg972.5.6290 | <i>T. brucei</i> | 42  | 84   | 125  |
| Tbg972.5.6290 | <i>T. brucei</i> | 42  | 84   | 125  |
| Tbg972.5.630  | <i>T. brucei</i> | 68  | 1    | 68   |
| Tbg972.5.630  | <i>T. brucei</i> | 46  | 82   | 127  |
| Tbg972.5.6300 | <i>T. brucei</i> | 76  | 44   | 119  |
| Tbg972.5.6380 | <i>T. brucei</i> | 72  | 81   | 152  |
| Tbg972.5.6380 | <i>T. brucei</i> | 44  | 214  | 257  |
| Tbg972.5.6380 | <i>T. brucei</i> | 98  | 273  | 370  |
| Tbg972.5.640  | <i>T. brucei</i> | 90  | 1    | 90   |
| Tbg972.5.6410 | <i>T. brucei</i> | 70  | 82   | 151  |
| Tbg972.5.6410 | <i>T. brucei</i> | 71  | 191  | 261  |
| Tbg972.5.6410 | <i>T. brucei</i> | 97  | 274  | 370  |
| Tbg972.5.6430 | <i>T. brucei</i> | 69  | 83   | 151  |
| Tbg972.5.6430 | <i>T. brucei</i> | 69  | 191  | 259  |
| Tbg972.5.6430 | <i>T. brucei</i> | 96  | 274  | 369  |
| Tbg972.5.6460 | <i>T. brucei</i> | 77  | 99   | 175  |
| Tbg972.5.6460 | <i>T. brucei</i> | 119 | 199  | 317  |
| Tbg972.5.6460 | <i>T. brucei</i> | 143 | 324  | 466  |
| Tbg972.5.6460 | <i>T. brucei</i> | 139 | 1097 | 1235 |
| Tbg972.5.6460 | <i>T. brucei</i> | 47  | 1256 | 1302 |
| Tbg972.5.650  | <i>T. brucei</i> | 73  | 14   | 86   |
| Tbg972.5.6530 | <i>T. brucei</i> | 134 | 106  | 239  |
| Tbg972.5.6540 | <i>T. brucei</i> | 58  | 467  | 524  |
| Tbg972.5.6550 | <i>T. brucei</i> | 70  | 83   | 152  |
| Tbg972.5.6550 | <i>T. brucei</i> | 50  | 211  | 260  |
| Tbg972.5.6550 | <i>T. brucei</i> | 101 | 274  | 374  |
| Tbg972.5.6570 | <i>T. brucei</i> | 70  | 82   | 151  |
| Tbg972.5.670  | <i>T. brucei</i> | 53  | 49   | 101  |
| Tbg972.5.690  | <i>T. brucei</i> | 41  | 1    | 41   |
| Tbg972.5.720  | <i>T. brucei</i> | 45  | 118  | 162  |
| Tbg972.5.740  | <i>T. brucei</i> | 56  | 1    | 56   |

|               |                  |     |      |      |
|---------------|------------------|-----|------|------|
| Tbg972.5.780  | <i>T. brucei</i> | 49  | 107  | 155  |
| Tbg972.5.790  | <i>T. brucei</i> | 53  | 85   | 137  |
| Tbg972.5.800  | <i>T. brucei</i> | 193 | 88   | 280  |
| Tbg972.5.800  | <i>T. brucei</i> | 42  | 292  | 333  |
| Tbg972.5.810  | <i>T. brucei</i> | 41  | 110  | 150  |
| Tbg972.5.820  | <i>T. brucei</i> | 61  | 1    | 61   |
| Tbg972.5.890  | <i>T. brucei</i> | 84  | 1198 | 1281 |
| Tbg972.5.90   | <i>T. brucei</i> | 51  | 144  | 194  |
| Tbg972.5.90   | <i>T. brucei</i> | 67  | 247  | 313  |
| Tbg972.5.900  | <i>T. brucei</i> | 73  | 387  | 459  |
| Tbg972.5.950  | <i>T. brucei</i> | 69  | 73   | 141  |
| Tbg972.5.960  | <i>T. brucei</i> | 89  | 31   | 119  |
| Tbg972.5.970  | <i>T. brucei</i> | 40  | 730  | 769  |
| Tbg972.5.980  | <i>T. brucei</i> | 67  | 22   | 88   |
| Tbg972.5.980  | <i>T. brucei</i> | 47  | 249  | 295  |
| Tbg972.5.980  | <i>T. brucei</i> | 91  | 343  | 433  |
| Tbg972.6.1020 | <i>T. brucei</i> | 72  | 108  | 179  |
| Tbg972.6.1030 | <i>T. brucei</i> | 64  | 73   | 136  |
| Tbg972.6.1030 | <i>T. brucei</i> | 140 | 204  | 343  |
| Tbg972.6.1040 | <i>T. brucei</i> | 63  | 1    | 63   |
| Tbg972.6.1070 | <i>T. brucei</i> | 174 | 95   | 268  |
| Tbg972.6.1070 | <i>T. brucei</i> | 162 | 554  | 715  |
| Tbg972.6.1080 | <i>T. brucei</i> | 44  | 185  | 228  |
| Tbg972.6.1090 | <i>T. brucei</i> | 44  | 17   | 60   |
| Tbg972.6.110  | <i>T. brucei</i> | 41  | 1123 | 1163 |
| Tbg972.6.1110 | <i>T. brucei</i> | 44  | 1    | 44   |
| Tbg972.6.1120 | <i>T. brucei</i> | 223 | 1    | 223  |
| Tbg972.6.1150 | <i>T. brucei</i> | 51  | 563  | 613  |
| Tbg972.6.1160 | <i>T. brucei</i> | 85  | 1    | 85   |
| Tbg972.6.1170 | <i>T. brucei</i> | 53  | 12   | 64   |
| Tbg972.6.1180 | <i>T. brucei</i> | 41  | 67   | 107  |
| Tbg972.6.120  | <i>T. brucei</i> | 62  | 176  | 237  |
| Tbg972.6.120  | <i>T. brucei</i> | 133 | 244  | 376  |
| Tbg972.6.1200 | <i>T. brucei</i> | 121 | 1    | 121  |
| Tbg972.6.1230 | <i>T. brucei</i> | 42  | 91   | 132  |
| Tbg972.6.1260 | <i>T. brucei</i> | 40  | 327  | 366  |
| Tbg972.6.1260 | <i>T. brucei</i> | 44  | 418  | 461  |
| Tbg972.6.1260 | <i>T. brucei</i> | 44  | 418  | 461  |
| Tbg972.6.1280 | <i>T. brucei</i> | 49  | 50   | 98   |
| Tbg972.6.130  | <i>T. brucei</i> | 55  | 29   | 83   |
| Tbg972.6.1310 | <i>T. brucei</i> | 46  | 221  | 266  |
| Tbg972.6.1350 | <i>T. brucei</i> | 68  | 303  | 370  |
| Tbg972.6.1350 | <i>T. brucei</i> | 55  | 488  | 542  |
| Tbg972.6.1350 | <i>T. brucei</i> | 55  | 488  | 542  |
| Tbg972.6.1360 | <i>T. brucei</i> | 47  | 1038 | 1084 |
| Tbg972.6.1370 | <i>T. brucei</i> | 44  | 185  | 228  |
| Tbg972.6.1370 | <i>T. brucei</i> | 71  | 487  | 557  |

|               |                  |     |     |      |
|---------------|------------------|-----|-----|------|
| Tbg972.6.1390 | <i>T. brucei</i> | 50  | 19  | 68   |
| Tbg972.6.140  | <i>T. brucei</i> | 85  | 30  | 114  |
| Tbg972.6.1410 | <i>T. brucei</i> | 60  | 364 | 423  |
| Tbg972.6.1410 | <i>T. brucei</i> | 43  | 580 | 622  |
| Tbg972.6.1410 | <i>T. brucei</i> | 43  | 580 | 622  |
| Tbg972.6.1420 | <i>T. brucei</i> | 52  | 267 | 318  |
| Tbg972.6.1420 | <i>T. brucei</i> | 339 | 352 | 690  |
| Tbg972.6.1420 | <i>T. brucei</i> | 279 | 987 | 1265 |
| Tbg972.6.1430 | <i>T. brucei</i> | 42  | 193 | 234  |
| Tbg972.6.1440 | <i>T. brucei</i> | 63  | 556 | 618  |
| Tbg972.6.1440 | <i>T. brucei</i> | 59  | 629 | 687  |
| Tbg972.6.1440 | <i>T. brucei</i> | 59  | 629 | 687  |
| Tbg972.6.1450 | <i>T. brucei</i> | 66  | 259 | 324  |
| Tbg972.6.1450 | <i>T. brucei</i> | 60  | 548 | 607  |
| Tbg972.6.1450 | <i>T. brucei</i> | 60  | 548 | 607  |
| Tbg972.6.1460 | <i>T. brucei</i> | 134 | 383 | 516  |
| Tbg972.6.150  | <i>T. brucei</i> | 109 | 19  | 127  |
| Tbg972.6.1500 | <i>T. brucei</i> | 43  | 329 | 371  |
| Tbg972.6.1510 | <i>T. brucei</i> | 91  | 306 | 396  |
| Tbg972.6.1530 | <i>T. brucei</i> | 40  | 1   | 40   |
| Tbg972.6.1550 | <i>T. brucei</i> | 50  | 440 | 489  |
| Tbg972.6.1560 | <i>T. brucei</i> | 60  | 108 | 167  |
| Tbg972.6.1560 | <i>T. brucei</i> | 100 | 243 | 342  |
| Tbg972.6.1560 | <i>T. brucei</i> | 100 | 243 | 342  |
| Tbg972.6.1570 | <i>T. brucei</i> | 244 | 1   | 244  |
| Tbg972.6.1580 | <i>T. brucei</i> | 51  | 1   | 51   |
| Tbg972.6.1590 | <i>T. brucei</i> | 59  | 1   | 59   |
| Tbg972.6.1590 | <i>T. brucei</i> | 49  | 346 | 394  |
| Tbg972.6.1590 | <i>T. brucei</i> | 61  | 544 | 604  |
| Tbg972.6.1600 | <i>T. brucei</i> | 51  | 1   | 51   |
| Tbg972.6.1600 | <i>T. brucei</i> | 157 | 61  | 217  |
| Tbg972.6.1610 | <i>T. brucei</i> | 237 | 27  | 263  |
| Tbg972.6.1610 | <i>T. brucei</i> | 42  | 296 | 337  |
| Tbg972.6.1610 | <i>T. brucei</i> | 140 | 367 | 506  |
| Tbg972.6.1640 | <i>T. brucei</i> | 351 | 1   | 351  |
| Tbg972.6.1660 | <i>T. brucei</i> | 133 | 538 | 670  |
| Tbg972.6.1670 | <i>T. brucei</i> | 60  | 260 | 319  |
| Tbg972.6.1670 | <i>T. brucei</i> | 56  | 807 | 862  |
| Tbg972.6.1670 | <i>T. brucei</i> | 56  | 807 | 862  |
| Tbg972.6.170  | <i>T. brucei</i> | 106 | 67  | 172  |
| Tbg972.6.1700 | <i>T. brucei</i> | 46  | 460 | 505  |
| Tbg972.6.1710 | <i>T. brucei</i> | 240 | 85  | 324  |
| Tbg972.6.1720 | <i>T. brucei</i> | 109 | 15  | 123  |
| Tbg972.6.1720 | <i>T. brucei</i> | 70  | 264 | 333  |
| Tbg972.6.1720 | <i>T. brucei</i> | 78  | 337 | 414  |
| Tbg972.6.1720 | <i>T. brucei</i> | 44  | 434 | 477  |
| Tbg972.6.1740 | <i>T. brucei</i> | 51  | 351 | 401  |



|               |                  |     |     |      |
|---------------|------------------|-----|-----|------|
| Tbg972.6.1770 | <i>T. brucei</i> | 110 | 69  | 178  |
| Tbg972.6.1770 | <i>T. brucei</i> | 52  | 180 | 231  |
| Tbg972.6.1770 | <i>T. brucei</i> | 111 | 529 | 639  |
| Tbg972.6.1780 | <i>T. brucei</i> | 42  | 1   | 42   |
| Tbg972.6.1790 | <i>T. brucei</i> | 171 | 43  | 213  |
| Tbg972.6.1800 | <i>T. brucei</i> | 43  | 22  | 64   |
| Tbg972.6.1810 | <i>T. brucei</i> | 69  | 120 | 188  |
| Tbg972.6.1830 | <i>T. brucei</i> | 50  | 1   | 50   |
| Tbg972.6.1860 | <i>T. brucei</i> | 96  | 50  | 145  |
| Tbg972.6.1860 | <i>T. brucei</i> | 76  | 175 | 250  |
| Tbg972.6.1870 | <i>T. brucei</i> | 54  | 59  | 112  |
| Tbg972.6.1890 | <i>T. brucei</i> | 60  | 540 | 599  |
| Tbg972.6.1930 | <i>T. brucei</i> | 49  | 1   | 49   |
| Tbg972.6.1940 | <i>T. brucei</i> | 69  | 27  | 95   |
| Tbg972.6.1960 | <i>T. brucei</i> | 41  | 1   | 41   |
| Tbg972.6.1970 | <i>T. brucei</i> | 165 | 38  | 202  |
| Tbg972.6.1990 | <i>T. brucei</i> | 246 | 883 | 1128 |
| Tbg972.6.2010 | <i>T. brucei</i> | 248 | 31  | 278  |
| Tbg972.6.2020 | <i>T. brucei</i> | 114 | 79  | 192  |
| Tbg972.6.2030 | <i>T. brucei</i> | 69  | 60  | 128  |
| Tbg972.6.2030 | <i>T. brucei</i> | 111 | 348 | 458  |
| Tbg972.6.2030 | <i>T. brucei</i> | 111 | 348 | 458  |
| Tbg972.6.2060 | <i>T. brucei</i> | 60  | 80  | 139  |
| Tbg972.6.2070 | <i>T. brucei</i> | 105 | 1   | 105  |
| Tbg972.6.2100 | <i>T. brucei</i> | 55  | 158 | 212  |
| Tbg972.6.2130 | <i>T. brucei</i> | 95  | 1   | 95   |
| Tbg972.6.2150 | <i>T. brucei</i> | 50  | 80  | 129  |
| Tbg972.6.2150 | <i>T. brucei</i> | 50  | 179 | 228  |
| Tbg972.6.2150 | <i>T. brucei</i> | 51  | 306 | 356  |
| Tbg972.6.2160 | <i>T. brucei</i> | 54  | 616 | 669  |
| Tbg972.6.2170 | <i>T. brucei</i> | 96  | 1   | 96   |
| Tbg972.6.2170 | <i>T. brucei</i> | 41  | 164 | 204  |
| Tbg972.6.2180 | <i>T. brucei</i> | 64  | 36  | 99   |
| Tbg972.6.2190 | <i>T. brucei</i> | 47  | 259 | 305  |
| Tbg972.6.220  | <i>T. brucei</i> | 44  | 71  | 114  |
| Tbg972.6.2220 | <i>T. brucei</i> | 59  | 702 | 760  |
| Tbg972.6.2220 | <i>T. brucei</i> | 52  | 948 | 999  |
| Tbg972.6.2230 | <i>T. brucei</i> | 58  | 1   | 58   |
| Tbg972.6.2230 | <i>T. brucei</i> | 97  | 208 | 304  |
| Tbg972.6.2230 | <i>T. brucei</i> | 97  | 208 | 304  |
| Tbg972.6.2240 | <i>T. brucei</i> | 225 | 137 | 361  |
| Tbg972.6.2260 | <i>T. brucei</i> | 45  | 184 | 228  |
| Tbg972.6.2270 | <i>T. brucei</i> | 44  | 1   | 44   |
| Tbg972.6.2280 | <i>T. brucei</i> | 79  | 466 | 544  |
| Tbg972.6.2280 | <i>T. brucei</i> | 78  | 585 | 662  |
| Tbg972.6.2280 | <i>T. brucei</i> | 49  | 673 | 721  |
| Tbg972.6.2280 | <i>T. brucei</i> | 53  | 730 | 782  |

|               |                  |     |      |      |
|---------------|------------------|-----|------|------|
| Tbg972.6.2280 | <i>T. brucei</i> | 57  | 798  | 854  |
| Tbg972.6.2300 | <i>T. brucei</i> | 199 | 1    | 199  |
| Tbg972.6.2300 | <i>T. brucei</i> | 66  | 258  | 323  |
| Tbg972.6.2300 | <i>T. brucei</i> | 73  | 507  | 579  |
| Tbg972.6.2310 | <i>T. brucei</i> | 54  | 1    | 54   |
| Tbg972.6.2330 | <i>T. brucei</i> | 41  | 48   | 88   |
| Tbg972.6.2330 | <i>T. brucei</i> | 52  | 188  | 239  |
| Tbg972.6.2330 | <i>T. brucei</i> | 82  | 262  | 343  |
| Tbg972.6.2330 | <i>T. brucei</i> | 63  | 373  | 435  |
| Tbg972.6.2340 | <i>T. brucei</i> | 70  | 114  | 183  |
| Tbg972.6.2340 | <i>T. brucei</i> | 50  | 304  | 353  |
| Tbg972.6.240  | <i>T. brucei</i> | 57  | 41   | 97   |
| Tbg972.6.2400 | <i>T. brucei</i> | 64  | 1    | 64   |
| Tbg972.6.2410 | <i>T. brucei</i> | 156 | 1    | 156  |
| Tbg972.6.2410 | <i>T. brucei</i> | 51  | 364  | 414  |
| Tbg972.6.2410 | <i>T. brucei</i> | 71  | 443  | 513  |
| Tbg972.6.2420 | <i>T. brucei</i> | 46  | 127  | 172  |
| Tbg972.6.2420 | <i>T. brucei</i> | 53  | 967  | 1019 |
| Tbg972.6.2420 | <i>T. brucei</i> | 53  | 967  | 1019 |
| Tbg972.6.2430 | <i>T. brucei</i> | 47  | 1    | 47   |
| Tbg972.6.2430 | <i>T. brucei</i> | 90  | 212  | 301  |
| Tbg972.6.2460 | <i>T. brucei</i> | 44  | 573  | 616  |
| Tbg972.6.2480 | <i>T. brucei</i> | 63  | 329  | 391  |
| Tbg972.6.2480 | <i>T. brucei</i> | 200 | 446  | 645  |
| Tbg972.6.2500 | <i>T. brucei</i> | 56  | 256  | 311  |
| Tbg972.6.2500 | <i>T. brucei</i> | 43  | 500  | 542  |
| Tbg972.6.2500 | <i>T. brucei</i> | 57  | 818  | 874  |
| Tbg972.6.2500 | <i>T. brucei</i> | 47  | 1062 | 1108 |
| Tbg972.6.2500 | <i>T. brucei</i> | 53  | 1190 | 1242 |
| Tbg972.6.2500 | <i>T. brucei</i> | 51  | 1462 | 1512 |
| Tbg972.6.2530 | <i>T. brucei</i> | 42  | 275  | 316  |
| Tbg972.6.2530 | <i>T. brucei</i> | 62  | 425  | 486  |
| Tbg972.6.2530 | <i>T. brucei</i> | 54  | 1363 | 1416 |
| Tbg972.6.2540 | <i>T. brucei</i> | 73  | 1    | 73   |
| Tbg972.6.2540 | <i>T. brucei</i> | 42  | 651  | 692  |
| Tbg972.6.2570 | <i>T. brucei</i> | 259 | 1    | 259  |
| Tbg972.6.2570 | <i>T. brucei</i> | 77  | 318  | 394  |
| Tbg972.6.2570 | <i>T. brucei</i> | 41  | 568  | 608  |
| Tbg972.6.2570 | <i>T. brucei</i> | 56  | 637  | 692  |
| Tbg972.6.2580 | <i>T. brucei</i> | 40  | 239  | 278  |
| Tbg972.6.2590 | <i>T. brucei</i> | 90  | 31   | 120  |
| Tbg972.6.2590 | <i>T. brucei</i> | 130 | 125  | 254  |
| Tbg972.6.2600 | <i>T. brucei</i> | 59  | 17   | 75   |
| Tbg972.6.2600 | <i>T. brucei</i> | 47  | 146  | 192  |
| Tbg972.6.2600 | <i>T. brucei</i> | 47  | 146  | 192  |
| Tbg972.6.2610 | <i>T. brucei</i> | 170 | 309  | 478  |
| Tbg972.6.2620 | <i>T. brucei</i> | 96  | 1    | 96   |

|               |                  |     |      |      |
|---------------|------------------|-----|------|------|
| Tbg972.6.2620 | <i>T. brucei</i> | 41  | 139  | 179  |
| Tbg972.6.2620 | <i>T. brucei</i> | 96  | 189  | 284  |
| Tbg972.6.2620 | <i>T. brucei</i> | 84  | 291  | 374  |
| Tbg972.6.2630 | <i>T. brucei</i> | 90  | 1    | 90   |
| Tbg972.6.2660 | <i>T. brucei</i> | 146 | 422  | 567  |
| Tbg972.6.2660 | <i>T. brucei</i> | 142 | 682  | 823  |
| Tbg972.6.2690 | <i>T. brucei</i> | 55  | 41   | 95   |
| Tbg972.6.2690 | <i>T. brucei</i> | 99  | 637  | 735  |
| Tbg972.6.270  | <i>T. brucei</i> | 44  | 1    | 44   |
| Tbg972.6.270  | <i>T. brucei</i> | 49  | 303  | 351  |
| Tbg972.6.270  | <i>T. brucei</i> | 49  | 303  | 351  |
| Tbg972.6.2710 | <i>T. brucei</i> | 86  | 298  | 383  |
| Tbg972.6.2710 | <i>T. brucei</i> | 40  | 526  | 565  |
| Tbg972.6.2710 | <i>T. brucei</i> | 70  | 616  | 685  |
| Tbg972.6.2710 | <i>T. brucei</i> | 52  | 699  | 750  |
| Tbg972.6.2720 | <i>T. brucei</i> | 51  | 138  | 188  |
| Tbg972.6.2740 | <i>T. brucei</i> | 124 | 126  | 249  |
| Tbg972.6.2750 | <i>T. brucei</i> | 47  | 637  | 683  |
| Tbg972.6.2760 | <i>T. brucei</i> | 64  | 395  | 458  |
| Tbg972.6.2770 | <i>T. brucei</i> | 41  | 40   | 80   |
| Tbg972.6.2770 | <i>T. brucei</i> | 41  | 211  | 251  |
| Tbg972.6.2770 | <i>T. brucei</i> | 107 | 428  | 534  |
| Tbg972.6.2770 | <i>T. brucei</i> | 51  | 679  | 729  |
| Tbg972.6.2770 | <i>T. brucei</i> | 54  | 794  | 847  |
| Tbg972.6.2810 | <i>T. brucei</i> | 41  | 1    | 41   |
| Tbg972.6.2810 | <i>T. brucei</i> | 54  | 81   | 134  |
| Tbg972.6.2810 | <i>T. brucei</i> | 104 | 142  | 245  |
| Tbg972.6.2820 | <i>T. brucei</i> | 111 | 622  | 732  |
| Tbg972.6.2850 | <i>T. brucei</i> | 236 | 1    | 236  |
| Tbg972.6.2860 | <i>T. brucei</i> | 114 | 1    | 114  |
| Tbg972.6.2860 | <i>T. brucei</i> | 203 | 135  | 337  |
| Tbg972.6.2880 | <i>T. brucei</i> | 83  | 509  | 591  |
| Tbg972.6.2880 | <i>T. brucei</i> | 107 | 798  | 904  |
| Tbg972.6.2880 | <i>T. brucei</i> | 123 | 1129 | 1251 |
| Tbg972.6.2880 | <i>T. brucei</i> | 63  | 1480 | 1542 |
| Tbg972.6.2880 | <i>T. brucei</i> | 47  | 1575 | 1621 |
| Tbg972.6.2890 | <i>T. brucei</i> | 226 | 1    | 226  |
| Tbg972.6.290  | <i>T. brucei</i> | 50  | 1    | 50   |
| Tbg972.6.290  | <i>T. brucei</i> | 60  | 408  | 467  |
| Tbg972.6.290  | <i>T. brucei</i> | 60  | 408  | 467  |
| Tbg972.6.2910 | <i>T. brucei</i> | 113 | 184  | 296  |
| Tbg972.6.2940 | <i>T. brucei</i> | 46  | 1    | 46   |
| Tbg972.6.2940 | <i>T. brucei</i> | 60  | 1332 | 1391 |
| Tbg972.6.2940 | <i>T. brucei</i> | 87  | 1695 | 1781 |
| Tbg972.6.2940 | <i>T. brucei</i> | 60  | 1981 | 2040 |
| Tbg972.6.2940 | <i>T. brucei</i> | 42  | 4340 | 4381 |
| Tbg972.6.2950 | <i>T. brucei</i> | 42  | 363  | 404  |

|               |                  |     |      |      |
|---------------|------------------|-----|------|------|
| Tbg972.6.2950 | <i>T. brucei</i> | 50  | 493  | 542  |
| Tbg972.6.2950 | <i>T. brucei</i> | 50  | 493  | 542  |
| Tbg972.6.2960 | <i>T. brucei</i> | 80  | 84   | 163  |
| Tbg972.6.2960 | <i>T. brucei</i> | 267 | 236  | 502  |
| Tbg972.6.2970 | <i>T. brucei</i> | 172 | 105  | 276  |
| Tbg972.6.2970 | <i>T. brucei</i> | 94  | 303  | 396  |
| Tbg972.6.2970 | <i>T. brucei</i> | 45  | 412  | 456  |
| Tbg972.6.2980 | <i>T. brucei</i> | 58  | 1    | 58   |
| Tbg972.6.2980 | <i>T. brucei</i> | 130 | 392  | 521  |
| Tbg972.6.2980 | <i>T. brucei</i> | 130 | 392  | 521  |
| Tbg972.6.2990 | <i>T. brucei</i> | 56  | 93   | 148  |
| Tbg972.6.30   | <i>T. brucei</i> | 71  | 232  | 302  |
| Tbg972.6.3010 | <i>T. brucei</i> | 62  | 234  | 295  |
| Tbg972.6.3030 | <i>T. brucei</i> | 152 | 120  | 271  |
| Tbg972.6.3050 | <i>T. brucei</i> | 106 | 177  | 282  |
| Tbg972.6.3070 | <i>T. brucei</i> | 43  | 515  | 557  |
| Tbg972.6.3070 | <i>T. brucei</i> | 48  | 1693 | 1740 |
| Tbg972.6.3070 | <i>T. brucei</i> | 48  | 1693 | 1740 |
| Tbg972.6.3080 | <i>T. brucei</i> | 74  | 57   | 130  |
| Tbg972.6.310  | <i>T. brucei</i> | 54  | 496  | 549  |
| Tbg972.6.310  | <i>T. brucei</i> | 46  | 1110 | 1155 |
| Tbg972.6.310  | <i>T. brucei</i> | 46  | 1110 | 1155 |
| Tbg972.6.3100 | <i>T. brucei</i> | 66  | 152  | 217  |
| Tbg972.6.3120 | <i>T. brucei</i> | 297 | 1    | 297  |
| Tbg972.6.3130 | <i>T. brucei</i> | 91  | 118  | 208  |
| Tbg972.6.3140 | <i>T. brucei</i> | 55  | 268  | 322  |
| Tbg972.6.3140 | <i>T. brucei</i> | 67  | 465  | 531  |
| Tbg972.6.3140 | <i>T. brucei</i> | 67  | 465  | 531  |
| Tbg972.6.3150 | <i>T. brucei</i> | 51  | 113  | 163  |
| Tbg972.6.3160 | <i>T. brucei</i> | 53  | 1    | 53   |
| Tbg972.6.3160 | <i>T. brucei</i> | 53  | 166  | 218  |
| Tbg972.6.3160 | <i>T. brucei</i> | 53  | 166  | 218  |
| Tbg972.6.3170 | <i>T. brucei</i> | 122 | 56   | 177  |
| Tbg972.6.3180 | <i>T. brucei</i> | 130 | 319  | 448  |
| Tbg972.6.320  | <i>T. brucei</i> | 47  | 335  | 381  |
| Tbg972.6.320  | <i>T. brucei</i> | 54  | 397  | 450  |
| Tbg972.6.320  | <i>T. brucei</i> | 54  | 397  | 450  |
| Tbg972.6.3200 | <i>T. brucei</i> | 118 | 366  | 483  |
| Tbg972.6.3210 | <i>T. brucei</i> | 71  | 476  | 546  |
| Tbg972.6.3220 | <i>T. brucei</i> | 42  | 30   | 71   |
| Tbg972.6.3220 | <i>T. brucei</i> | 89  | 151  | 239  |
| Tbg972.6.3220 | <i>T. brucei</i> | 89  | 151  | 239  |
| Tbg972.6.3230 | <i>T. brucei</i> | 87  | 169  | 255  |
| Tbg972.6.3240 | <i>T. brucei</i> | 102 | 1    | 102  |
| Tbg972.6.3250 | <i>T. brucei</i> | 65  | 689  | 753  |
| Tbg972.6.3270 | <i>T. brucei</i> | 41  | 1    | 41   |
| Tbg972.6.3280 | <i>T. brucei</i> | 52  | 1    | 52   |

|               |                  |     |      |      |
|---------------|------------------|-----|------|------|
| Tbg972.6.3280 | <i>T. brucei</i> | 61  | 79   | 139  |
| Tbg972.6.3280 | <i>T. brucei</i> | 105 | 162  | 266  |
| Tbg972.6.330  | <i>T. brucei</i> | 254 | 1    | 254  |
| Tbg972.6.330  | <i>T. brucei</i> | 102 | 516  | 617  |
| Tbg972.6.3300 | <i>T. brucei</i> | 63  | 96   | 158  |
| Tbg972.6.3300 | <i>T. brucei</i> | 96  | 271  | 366  |
| Tbg972.6.3300 | <i>T. brucei</i> | 96  | 271  | 366  |
| Tbg972.6.3310 | <i>T. brucei</i> | 43  | 752  | 794  |
| Tbg972.6.3320 | <i>T. brucei</i> | 108 | 156  | 263  |
| Tbg972.6.3320 | <i>T. brucei</i> | 81  | 313  | 393  |
| Tbg972.6.3320 | <i>T. brucei</i> | 216 | 426  | 641  |
| Tbg972.6.3320 | <i>T. brucei</i> | 65  | 691  | 755  |
| Tbg972.6.3320 | <i>T. brucei</i> | 48  | 1202 | 1249 |
| Tbg972.6.3320 | <i>T. brucei</i> | 88  | 1398 | 1485 |
| Tbg972.6.3330 | <i>T. brucei</i> | 73  | 1    | 73   |
| Tbg972.6.3340 | <i>T. brucei</i> | 77  | 5    | 81   |
| Tbg972.6.3350 | <i>T. brucei</i> | 41  | 164  | 204  |
| Tbg972.6.3350 | <i>T. brucei</i> | 40  | 433  | 472  |
| Tbg972.6.3350 | <i>T. brucei</i> | 134 | 674  | 807  |
| Tbg972.6.3350 | <i>T. brucei</i> | 57  | 892  | 948  |
| Tbg972.6.3350 | <i>T. brucei</i> | 50  | 1052 | 1101 |
| Tbg972.6.3370 | <i>T. brucei</i> | 52  | 294  | 345  |
| Tbg972.6.3380 | <i>T. brucei</i> | 57  | 97   | 153  |
| Tbg972.6.3380 | <i>T. brucei</i> | 54  | 173  | 226  |
| Tbg972.6.3380 | <i>T. brucei</i> | 58  | 239  | 296  |
| Tbg972.6.3380 | <i>T. brucei</i> | 75  | 362  | 436  |
| Tbg972.6.3380 | <i>T. brucei</i> | 129 | 476  | 604  |
| Tbg972.6.340  | <i>T. brucei</i> | 85  | 201  | 285  |
| Tbg972.6.340  | <i>T. brucei</i> | 43  | 1281 | 1323 |
| Tbg972.6.340  | <i>T. brucei</i> | 43  | 1281 | 1323 |
| Tbg972.6.3420 | <i>T. brucei</i> | 104 | 1    | 104  |
| Tbg972.6.3420 | <i>T. brucei</i> | 82  | 141  | 222  |
| Tbg972.6.3420 | <i>T. brucei</i> | 82  | 141  | 222  |
| Tbg972.6.3440 | <i>T. brucei</i> | 49  | 1    | 49   |
| Tbg972.6.3440 | <i>T. brucei</i> | 60  | 294  | 353  |
| Tbg972.6.3440 | <i>T. brucei</i> | 114 | 823  | 936  |
| Tbg972.6.3440 | <i>T. brucei</i> | 73  | 1121 | 1193 |
| Tbg972.6.3440 | <i>T. brucei</i> | 54  | 2280 | 2333 |
| Tbg972.6.3440 | <i>T. brucei</i> | 41  | 3164 | 3204 |
| Tbg972.6.3470 | <i>T. brucei</i> | 82  | 45   | 126  |
| Tbg972.6.3480 | <i>T. brucei</i> | 56  | 53   | 108  |
| Tbg972.6.3480 | <i>T. brucei</i> | 126 | 296  | 421  |
| Tbg972.6.3480 | <i>T. brucei</i> | 285 | 434  | 718  |
| Tbg972.6.3490 | <i>T. brucei</i> | 58  | 54   | 111  |
| Tbg972.6.350  | <i>T. brucei</i> | 76  | 34   | 109  |
| Tbg972.6.350  | <i>T. brucei</i> | 103 | 223  | 325  |
| Tbg972.6.350  | <i>T. brucei</i> | 179 | 493  | 671  |

|               |                  |     |     |     |
|---------------|------------------|-----|-----|-----|
| Tbg972.6.3500 | <i>T. brucei</i> | 62  | 67  | 128 |
| Tbg972.6.3500 | <i>T. brucei</i> | 59  | 142 | 200 |
| Tbg972.6.3510 | <i>T. brucei</i> | 51  | 284 | 334 |
| Tbg972.6.3510 | <i>T. brucei</i> | 144 | 515 | 658 |
| Tbg972.6.3520 | <i>T. brucei</i> | 144 | 514 | 657 |
| Tbg972.6.3560 | <i>T. brucei</i> | 102 | 1   | 102 |
| Tbg972.6.3580 | <i>T. brucei</i> | 144 | 514 | 657 |
| Tbg972.6.3590 | <i>T. brucei</i> | 92  | 63  | 154 |
| Tbg972.6.360  | <i>T. brucei</i> | 79  | 181 | 259 |
| Tbg972.6.3600 | <i>T. brucei</i> | 188 | 1   | 188 |
| Tbg972.6.3600 | <i>T. brucei</i> | 76  | 256 | 331 |
| Tbg972.6.3600 | <i>T. brucei</i> | 45  | 362 | 406 |
| Tbg972.6.3610 | <i>T. brucei</i> | 47  | 141 | 187 |
| Tbg972.6.3630 | <i>T. brucei</i> | 52  | 101 | 152 |
| Tbg972.6.3650 | <i>T. brucei</i> | 64  | 1   | 64  |
| Tbg972.6.3650 | <i>T. brucei</i> | 74  | 141 | 214 |
| Tbg972.6.3650 | <i>T. brucei</i> | 74  | 141 | 214 |
| Tbg972.6.3660 | <i>T. brucei</i> | 73  | 21  | 93  |
| Tbg972.6.3660 | <i>T. brucei</i> | 82  | 379 | 460 |
| Tbg972.6.3670 | <i>T. brucei</i> | 41  | 1   | 41  |
| Tbg972.6.3680 | <i>T. brucei</i> | 43  | 59  | 101 |
| Tbg972.6.3680 | <i>T. brucei</i> | 152 | 355 | 506 |
| Tbg972.6.370  | <i>T. brucei</i> | 146 | 44  | 189 |
| Tbg972.6.370  | <i>T. brucei</i> | 53  | 197 | 249 |
| Tbg972.6.370  | <i>T. brucei</i> | 61  | 281 | 341 |
| Tbg972.6.3700 | <i>T. brucei</i> | 66  | 94  | 159 |
| Tbg972.6.3710 | <i>T. brucei</i> | 61  | 57  | 117 |
| Tbg972.6.3730 | <i>T. brucei</i> | 163 | 1   | 163 |
| Tbg972.6.3750 | <i>T. brucei</i> | 66  | 60  | 125 |
| Tbg972.6.3750 | <i>T. brucei</i> | 77  | 198 | 274 |
| Tbg972.6.3750 | <i>T. brucei</i> | 77  | 198 | 274 |
| Tbg972.6.3760 | <i>T. brucei</i> | 64  | 171 | 234 |
| Tbg972.6.3770 | <i>T. brucei</i> | 56  | 16  | 71  |
| Tbg972.6.3770 | <i>T. brucei</i> | 375 | 83  | 457 |
| Tbg972.6.3770 | <i>T. brucei</i> | 182 | 532 | 713 |
| Tbg972.6.3780 | <i>T. brucei</i> | 49  | 100 | 148 |
| Tbg972.6.3780 | <i>T. brucei</i> | 53  | 235 | 287 |
| Tbg972.6.3780 | <i>T. brucei</i> | 85  | 310 | 394 |
| Tbg972.6.380  | <i>T. brucei</i> | 199 | 51  | 249 |
| Tbg972.6.3820 | <i>T. brucei</i> | 44  | 169 | 212 |
| Tbg972.6.3830 | <i>T. brucei</i> | 49  | 77  | 125 |
| Tbg972.6.3830 | <i>T. brucei</i> | 62  | 165 | 226 |
| Tbg972.6.3830 | <i>T. brucei</i> | 62  | 165 | 226 |
| Tbg972.6.3850 | <i>T. brucei</i> | 65  | 32  | 96  |
| Tbg972.6.3870 | <i>T. brucei</i> | 71  | 41  | 111 |
| Tbg972.6.3890 | <i>T. brucei</i> | 537 | 1   | 537 |
| Tbg972.6.3890 | <i>T. brucei</i> | 228 | 570 | 797 |

|               |                  |     |      |      |
|---------------|------------------|-----|------|------|
| Tbg972.6.390  | <i>T. brucei</i> | 44  | 923  | 966  |
| Tbg972.6.3930 | <i>T. brucei</i> | 40  | 23   | 62   |
| Tbg972.6.3940 | <i>T. brucei</i> | 129 | 42   | 170  |
| Tbg972.6.400  | <i>T. brucei</i> | 51  | 147  | 197  |
| Tbg972.6.4030 | <i>T. brucei</i> | 299 | 202  | 500  |
| Tbg972.6.4060 | <i>T. brucei</i> | 55  | 179  | 233  |
| Tbg972.6.4070 | <i>T. brucei</i> | 103 | 134  | 236  |
| Tbg972.6.4090 | <i>T. brucei</i> | 44  | 31   | 74   |
| Tbg972.6.410  | <i>T. brucei</i> | 59  | 131  | 189  |
| Tbg972.6.4120 | <i>T. brucei</i> | 43  | 150  | 192  |
| Tbg972.6.4160 | <i>T. brucei</i> | 72  | 216  | 287  |
| Tbg972.6.4180 | <i>T. brucei</i> | 66  | 113  | 178  |
| Tbg972.6.4180 | <i>T. brucei</i> | 54  | 184  | 237  |
| Tbg972.6.4180 | <i>T. brucei</i> | 54  | 184  | 237  |
| Tbg972.6.4190 | <i>T. brucei</i> | 47  | 376  | 422  |
| Tbg972.6.420  | <i>T. brucei</i> | 62  | 107  | 168  |
| Tbg972.6.4210 | <i>T. brucei</i> | 46  | 1    | 46   |
| Tbg972.6.4210 | <i>T. brucei</i> | 113 | 392  | 504  |
| Tbg972.6.4210 | <i>T. brucei</i> | 115 | 589  | 703  |
| Tbg972.6.4210 | <i>T. brucei</i> | 160 | 705  | 864  |
| Tbg972.6.4210 | <i>T. brucei</i> | 78  | 878  | 955  |
| Tbg972.6.4210 | <i>T. brucei</i> | 134 | 978  | 1111 |
| Tbg972.6.4240 | <i>T. brucei</i> | 43  | 1    | 43   |
| Tbg972.6.4260 | <i>T. brucei</i> | 48  | 928  | 975  |
| Tbg972.6.4300 | <i>T. brucei</i> | 409 | 1    | 409  |
| Tbg972.6.4310 | <i>T. brucei</i> | 76  | 1    | 76   |
| Tbg972.6.4320 | <i>T. brucei</i> | 44  | 110  | 153  |
| Tbg972.6.4340 | <i>T. brucei</i> | 54  | 236  | 289  |
| Tbg972.6.4340 | <i>T. brucei</i> | 273 | 320  | 592  |
| Tbg972.6.4340 | <i>T. brucei</i> | 273 | 320  | 592  |
| Tbg972.6.440  | <i>T. brucei</i> | 42  | 103  | 144  |
| Tbg972.6.4410 | <i>T. brucei</i> | 42  | 566  | 607  |
| Tbg972.6.4420 | <i>T. brucei</i> | 115 | 60   | 174  |
| Tbg972.6.4420 | <i>T. brucei</i> | 77  | 487  | 563  |
| Tbg972.6.4420 | <i>T. brucei</i> | 77  | 487  | 563  |
| Tbg972.6.4430 | <i>T. brucei</i> | 125 | 289  | 413  |
| Tbg972.6.4460 | <i>T. brucei</i> | 61  | 384  | 444  |
| Tbg972.6.4460 | <i>T. brucei</i> | 67  | 509  | 575  |
| Tbg972.6.4460 | <i>T. brucei</i> | 131 | 774  | 904  |
| Tbg972.6.4470 | <i>T. brucei</i> | 77  | 71   | 147  |
| Tbg972.6.4470 | <i>T. brucei</i> | 60  | 191  | 250  |
| Tbg972.6.4470 | <i>T. brucei</i> | 60  | 256  | 315  |
| Tbg972.6.450  | <i>T. brucei</i> | 131 | 1    | 131  |
| Tbg972.6.450  | <i>T. brucei</i> | 47  | 1103 | 1149 |
| Tbg972.6.450  | <i>T. brucei</i> | 64  | 1188 | 1251 |
| Tbg972.6.4500 | <i>T. brucei</i> | 48  | 1    | 48   |
| Tbg972.6.4500 | <i>T. brucei</i> | 60  | 225  | 284  |

|               |                  |     |      |      |
|---------------|------------------|-----|------|------|
| Tbg972.6.4500 | <i>T. brucei</i> | 60  | 225  | 284  |
| Tbg972.6.4520 | <i>T. brucei</i> | 42  | 1    | 42   |
| Tbg972.6.4530 | <i>T. brucei</i> | 98  | 467  | 564  |
| Tbg972.6.4540 | <i>T. brucei</i> | 50  | 72   | 121  |
| Tbg972.6.4560 | <i>T. brucei</i> | 40  | 1    | 40   |
| Tbg972.6.4580 | <i>T. brucei</i> | 129 | 249  | 377  |
| Tbg972.6.4600 | <i>T. brucei</i> | 149 | 1    | 149  |
| Tbg972.6.4620 | <i>T. brucei</i> | 45  | 20   | 64   |
| Tbg972.6.4650 | <i>T. brucei</i> | 122 | 60   | 181  |
| Tbg972.6.4660 | <i>T. brucei</i> | 148 | 70   | 217  |
| Tbg972.6.4740 | <i>T. brucei</i> | 56  | 192  | 247  |
| Tbg972.6.4760 | <i>T. brucei</i> | 66  | 55   | 120  |
| Tbg972.6.4760 | <i>T. brucei</i> | 48  | 131  | 178  |
| Tbg972.6.4760 | <i>T. brucei</i> | 41  | 202  | 242  |
| Tbg972.6.4770 | <i>T. brucei</i> | 152 | 1    | 152  |
| Tbg972.6.4770 | <i>T. brucei</i> | 92  | 310  | 401  |
| Tbg972.6.4770 | <i>T. brucei</i> | 65  | 580  | 644  |
| Tbg972.6.4770 | <i>T. brucei</i> | 58  | 666  | 723  |
| Tbg972.6.4780 | <i>T. brucei</i> | 51  | 94   | 144  |
| Tbg972.6.480  | <i>T. brucei</i> | 51  | 1    | 51   |
| Tbg972.6.4800 | <i>T. brucei</i> | 42  | 322  | 363  |
| Tbg972.6.4810 | <i>T. brucei</i> | 142 | 24   | 165  |
| Tbg972.6.4810 | <i>T. brucei</i> | 94  | 179  | 272  |
| Tbg972.6.4810 | <i>T. brucei</i> | 87  | 298  | 384  |
| Tbg972.6.4830 | <i>T. brucei</i> | 76  | 309  | 384  |
| Tbg972.6.4830 | <i>T. brucei</i> | 41  | 500  | 540  |
| Tbg972.6.4830 | <i>T. brucei</i> | 41  | 500  | 540  |
| Tbg972.6.4840 | <i>T. brucei</i> | 47  | 158  | 204  |
| Tbg972.6.4870 | <i>T. brucei</i> | 47  | 1    | 47   |
| Tbg972.6.4870 | <i>T. brucei</i> | 90  | 117  | 206  |
| Tbg972.6.4870 | <i>T. brucei</i> | 90  | 117  | 206  |
| Tbg972.6.4880 | <i>T. brucei</i> | 55  | 79   | 133  |
| Tbg972.6.4890 | <i>T. brucei</i> | 49  | 1    | 49   |
| Tbg972.6.4900 | <i>T. brucei</i> | 140 | 1    | 140  |
| Tbg972.6.4900 | <i>T. brucei</i> | 112 | 423  | 534  |
| Tbg972.6.4900 | <i>T. brucei</i> | 112 | 423  | 534  |
| Tbg972.6.4920 | <i>T. brucei</i> | 78  | 30   | 107  |
| Tbg972.6.4930 | <i>T. brucei</i> | 78  | 30   | 107  |
| Tbg972.6.4940 | <i>T. brucei</i> | 84  | 137  | 220  |
| Tbg972.6.4950 | <i>T. brucei</i> | 80  | 35   | 114  |
| Tbg972.6.4950 | <i>T. brucei</i> | 43  | 813  | 855  |
| Tbg972.6.4950 | <i>T. brucei</i> | 43  | 1005 | 1047 |
| Tbg972.6.5    | <i>T. brucei</i> | 159 | 1    | 159  |
| Tbg972.6.580  | <i>T. brucei</i> | 66  | 1    | 66   |
| Tbg972.6.580  | <i>T. brucei</i> | 56  | 151  | 206  |
| Tbg972.6.580  | <i>T. brucei</i> | 56  | 151  | 206  |
| Tbg972.6.590  | <i>T. brucei</i> | 65  | 70   | 134  |



|              |                  |     |      |      |
|--------------|------------------|-----|------|------|
| Tbg972.6.590 | <i>T. brucei</i> | 122 | 136  | 257  |
| Tbg972.6.590 | <i>T. brucei</i> | 143 | 307  | 449  |
| Tbg972.6.590 | <i>T. brucei</i> | 60  | 480  | 539  |
| Tbg972.6.590 | <i>T. brucei</i> | 95  | 939  | 1033 |
| Tbg972.6.610 | <i>T. brucei</i> | 142 | 133  | 274  |
| Tbg972.6.620 | <i>T. brucei</i> | 116 | 1    | 116  |
| Tbg972.6.620 | <i>T. brucei</i> | 46  | 256  | 301  |
| Tbg972.6.630 | <i>T. brucei</i> | 132 | 1    | 132  |
| Tbg972.6.630 | <i>T. brucei</i> | 161 | 140  | 300  |
| Tbg972.6.630 | <i>T. brucei</i> | 67  | 330  | 396  |
| Tbg972.6.630 | <i>T. brucei</i> | 114 | 405  | 518  |
| Tbg972.6.630 | <i>T. brucei</i> | 120 | 605  | 724  |
| Tbg972.6.640 | <i>T. brucei</i> | 41  | 1    | 41   |
| Tbg972.6.640 | <i>T. brucei</i> | 40  | 164  | 203  |
| Tbg972.6.640 | <i>T. brucei</i> | 104 | 318  | 421  |
| Tbg972.6.640 | <i>T. brucei</i> | 63  | 457  | 519  |
| Tbg972.6.640 | <i>T. brucei</i> | 78  | 651  | 728  |
| Tbg972.6.640 | <i>T. brucei</i> | 53  | 1223 | 1275 |
| Tbg972.6.640 | <i>T. brucei</i> | 282 | 1491 | 1772 |
| Tbg972.6.650 | <i>T. brucei</i> | 53  | 152  | 204  |
| Tbg972.6.660 | <i>T. brucei</i> | 476 | 543  | 1018 |
| Tbg972.6.660 | <i>T. brucei</i> | 46  | 1135 | 1180 |
| Tbg972.6.660 | <i>T. brucei</i> | 65  | 1432 | 1496 |
| Tbg972.6.670 | <i>T. brucei</i> | 754 | 1    | 754  |
| Tbg972.6.670 | <i>T. brucei</i> | 77  | 889  | 965  |
| Tbg972.6.680 | <i>T. brucei</i> | 79  | 33   | 111  |
| Tbg972.6.680 | <i>T. brucei</i> | 47  | 158  | 204  |
| Tbg972.6.680 | <i>T. brucei</i> | 47  | 158  | 204  |
| Tbg972.6.690 | <i>T. brucei</i> | 100 | 44   | 143  |
| Tbg972.6.690 | <i>T. brucei</i> | 48  | 506  | 553  |
| Tbg972.6.690 | <i>T. brucei</i> | 42  | 832  | 873  |
| Tbg972.6.690 | <i>T. brucei</i> | 47  | 1197 | 1243 |
| Tbg972.6.690 | <i>T. brucei</i> | 49  | 1265 | 1313 |
| Tbg972.6.690 | <i>T. brucei</i> | 50  | 1422 | 1471 |
| Tbg972.6.720 | <i>T. brucei</i> | 62  | 138  | 199  |
| Tbg972.6.720 | <i>T. brucei</i> | 139 | 647  | 785  |
| Tbg972.6.720 | <i>T. brucei</i> | 139 | 647  | 785  |
| Tbg972.6.725 | <i>T. brucei</i> | 47  | 333  | 379  |
| Tbg972.6.735 | <i>T. brucei</i> | 45  | 334  | 378  |
| Tbg972.6.740 | <i>T. brucei</i> | 45  | 288  | 332  |
| Tbg972.6.760 | <i>T. brucei</i> | 45  | 334  | 378  |
| Tbg972.6.770 | <i>T. brucei</i> | 64  | 1    | 64   |
| Tbg972.6.770 | <i>T. brucei</i> | 59  | 94   | 152  |
| Tbg972.6.770 | <i>T. brucei</i> | 41  | 524  | 564  |
| Tbg972.6.770 | <i>T. brucei</i> | 79  | 792  | 870  |
| Tbg972.6.800 | <i>T. brucei</i> | 40  | 187  | 226  |
| Tbg972.6.800 | <i>T. brucei</i> | 135 | 256  | 390  |

|               |                  |     |      |      |
|---------------|------------------|-----|------|------|
| Tbg972.6.800  | <i>T. brucei</i> | 55  | 401  | 455  |
| Tbg972.6.810  | <i>T. brucei</i> | 68  | 432  | 499  |
| Tbg972.6.810  | <i>T. brucei</i> | 42  | 648  | 689  |
| Tbg972.6.810  | <i>T. brucei</i> | 82  | 745  | 826  |
| Tbg972.6.810  | <i>T. brucei</i> | 42  | 837  | 878  |
| Tbg972.6.810  | <i>T. brucei</i> | 41  | 919  | 959  |
| Tbg972.6.820  | <i>T. brucei</i> | 43  | 325  | 367  |
| Tbg972.6.830  | <i>T. brucei</i> | 165 | 218  | 382  |
| Tbg972.6.840  | <i>T. brucei</i> | 41  | 331  | 371  |
| Tbg972.6.860  | <i>T. brucei</i> | 127 | 1    | 127  |
| Tbg972.6.860  | <i>T. brucei</i> | 186 | 391  | 576  |
| Tbg972.6.870  | <i>T. brucei</i> | 119 | 233  | 351  |
| Tbg972.6.880  | <i>T. brucei</i> | 40  | 15   | 54   |
| Tbg972.6.880  | <i>T. brucei</i> | 161 | 92   | 252  |
| Tbg972.6.880  | <i>T. brucei</i> | 191 | 286  | 476  |
| Tbg972.6.880  | <i>T. brucei</i> | 229 | 487  | 715  |
| Tbg972.6.880  | <i>T. brucei</i> | 502 | 770  | 1271 |
| Tbg972.6.90   | <i>T. brucei</i> | 52  | 221  | 272  |
| Tbg972.6.920  | <i>T. brucei</i> | 62  | 11   | 72   |
| Tbg972.6.920  | <i>T. brucei</i> | 75  | 112  | 186  |
| Tbg972.6.920  | <i>T. brucei</i> | 212 | 345  | 556  |
| Tbg972.6.950  | <i>T. brucei</i> | 46  | 1    | 46   |
| Tbg972.7.10   | <i>T. brucei</i> | 77  | 75   | 151  |
| Tbg972.7.1020 | <i>T. brucei</i> | 293 | 163  | 455  |
| Tbg972.7.1030 | <i>T. brucei</i> | 42  | 93   | 134  |
| Tbg972.7.1030 | <i>T. brucei</i> | 79  | 371  | 449  |
| Tbg972.7.1030 | <i>T. brucei</i> | 79  | 371  | 449  |
| Tbg972.7.1050 | <i>T. brucei</i> | 150 | 1    | 150  |
| Tbg972.7.1050 | <i>T. brucei</i> | 59  | 362  | 420  |
| Tbg972.7.1050 | <i>T. brucei</i> | 52  | 1353 | 1404 |
| Tbg972.7.1060 | <i>T. brucei</i> | 42  | 1    | 42   |
| Tbg972.7.1070 | <i>T. brucei</i> | 75  | 1    | 75   |
| Tbg972.7.1070 | <i>T. brucei</i> | 151 | 162  | 312  |
| Tbg972.7.1070 | <i>T. brucei</i> | 51  | 636  | 686  |
| Tbg972.7.110  | <i>T. brucei</i> | 40  | 64   | 103  |
| Tbg972.7.1110 | <i>T. brucei</i> | 90  | 342  | 431  |
| Tbg972.7.1110 | <i>T. brucei</i> | 43  | 441  | 483  |
| Tbg972.7.1110 | <i>T. brucei</i> | 98  | 1215 | 1312 |
| Tbg972.7.1130 | <i>T. brucei</i> | 43  | 1    | 43   |
| Tbg972.7.1130 | <i>T. brucei</i> | 47  | 113  | 159  |
| Tbg972.7.1130 | <i>T. brucei</i> | 47  | 113  | 159  |
| Tbg972.7.1140 | <i>T. brucei</i> | 118 | 71   | 188  |
| Tbg972.7.1160 | <i>T. brucei</i> | 66  | 149  | 214  |
| Tbg972.7.1180 | <i>T. brucei</i> | 99  | 77   | 175  |
| Tbg972.7.120  | <i>T. brucei</i> | 40  | 64   | 103  |
| Tbg972.7.1200 | <i>T. brucei</i> | 73  | 152  | 224  |
| Tbg972.7.1200 | <i>T. brucei</i> | 214 | 342  | 555  |

|               |                  |     |      |      |
|---------------|------------------|-----|------|------|
| Tbg972.7.1200 | <i>T. brucei</i> | 119 | 825  | 943  |
| Tbg972.7.1210 | <i>T. brucei</i> | 86  | 211  | 296  |
| Tbg972.7.1220 | <i>T. brucei</i> | 73  | 116  | 188  |
| Tbg972.7.1220 | <i>T. brucei</i> | 50  | 337  | 386  |
| Tbg972.7.1220 | <i>T. brucei</i> | 57  | 463  | 519  |
| Tbg972.7.1220 | <i>T. brucei</i> | 99  | 581  | 679  |
| Tbg972.7.1230 | <i>T. brucei</i> | 101 | 69   | 169  |
| Tbg972.7.1240 | <i>T. brucei</i> | 54  | 74   | 127  |
| Tbg972.7.1250 | <i>T. brucei</i> | 47  | 196  | 242  |
| Tbg972.7.1260 | <i>T. brucei</i> | 66  | 242  | 307  |
| Tbg972.7.1270 | <i>T. brucei</i> | 44  | 592  | 635  |
| Tbg972.7.1270 | <i>T. brucei</i> | 40  | 1038 | 1077 |
| Tbg972.7.1270 | <i>T. brucei</i> | 40  | 1038 | 1077 |
| Tbg972.7.1290 | <i>T. brucei</i> | 48  | 145  | 192  |
| Tbg972.7.1320 | <i>T. brucei</i> | 48  | 1    | 48   |
| Tbg972.7.1320 | <i>T. brucei</i> | 289 | 78   | 366  |
| Tbg972.7.1350 | <i>T. brucei</i> | 52  | 1    | 52   |
| Tbg972.7.1350 | <i>T. brucei</i> | 51  | 112  | 162  |
| Tbg972.7.1350 | <i>T. brucei</i> | 40  | 566  | 605  |
| Tbg972.7.1370 | <i>T. brucei</i> | 98  | 87   | 184  |
| Tbg972.7.1380 | <i>T. brucei</i> | 75  | 1    | 75   |
| Tbg972.7.1380 | <i>T. brucei</i> | 138 | 266  | 403  |
| Tbg972.7.1400 | <i>T. brucei</i> | 62  | 980  | 1041 |
| Tbg972.7.1400 | <i>T. brucei</i> | 228 | 1059 | 1286 |
| Tbg972.7.1440 | <i>T. brucei</i> | 46  | 68   | 113  |
| Tbg972.7.1450 | <i>T. brucei</i> | 47  | 224  | 270  |
| Tbg972.7.1490 | <i>T. brucei</i> | 118 | 19   | 136  |
| Tbg972.7.150  | <i>T. brucei</i> | 80  | 291  | 370  |
| Tbg972.7.1510 | <i>T. brucei</i> | 129 | 490  | 618  |
| Tbg972.7.1570 | <i>T. brucei</i> | 48  | 444  | 491  |
| Tbg972.7.1580 | <i>T. brucei</i> | 42  | 20   | 61   |
| Tbg972.7.1580 | <i>T. brucei</i> | 55  | 602  | 656  |
| Tbg972.7.1580 | <i>T. brucei</i> | 55  | 602  | 656  |
| Tbg972.7.1590 | <i>T. brucei</i> | 82  | 34   | 115  |
| Tbg972.7.1620 | <i>T. brucei</i> | 45  | 155  | 199  |
| Tbg972.7.1630 | <i>T. brucei</i> | 73  | 27   | 99   |
| Tbg972.7.1630 | <i>T. brucei</i> | 83  | 123  | 205  |
| Tbg972.7.1650 | <i>T. brucei</i> | 53  | 1    | 53   |
| Tbg972.7.1660 | <i>T. brucei</i> | 65  | 1    | 65   |
| Tbg972.7.1660 | <i>T. brucei</i> | 75  | 195  | 269  |
| Tbg972.7.1660 | <i>T. brucei</i> | 44  | 464  | 507  |
| Tbg972.7.1670 | <i>T. brucei</i> | 56  | 525  | 580  |
| Tbg972.7.1670 | <i>T. brucei</i> | 85  | 704  | 788  |
| Tbg972.7.1670 | <i>T. brucei</i> | 85  | 704  | 788  |
| Tbg972.7.1700 | <i>T. brucei</i> | 51  | 248  | 298  |
| Tbg972.7.1710 | <i>T. brucei</i> | 46  | 65   | 110  |
| Tbg972.7.1740 | <i>T. brucei</i> | 70  | 1    | 70   |

|               |                  |     |     |     |
|---------------|------------------|-----|-----|-----|
| Tbg972.7.1750 | <i>T. brucei</i> | 70  | 16  | 85  |
| Tbg972.7.1760 | <i>T. brucei</i> | 60  | 1   | 60  |
| Tbg972.7.1760 | <i>T. brucei</i> | 132 | 62  | 193 |
| Tbg972.7.1760 | <i>T. brucei</i> | 54  | 267 | 320 |
| Tbg972.7.1770 | <i>T. brucei</i> | 78  | 126 | 203 |
| Tbg972.7.180  | <i>T. brucei</i> | 120 | 37  | 156 |
| Tbg972.7.1830 | <i>T. brucei</i> | 51  | 32  | 82  |
| Tbg972.7.1830 | <i>T. brucei</i> | 77  | 91  | 167 |
| Tbg972.7.1830 | <i>T. brucei</i> | 80  | 287 | 366 |
| Tbg972.7.1840 | <i>T. brucei</i> | 81  | 138 | 218 |
| Tbg972.7.1870 | <i>T. brucei</i> | 81  | 138 | 218 |
| Tbg972.7.1880 | <i>T. brucei</i> | 63  | 29  | 91  |
| Tbg972.7.1880 | <i>T. brucei</i> | 58  | 134 | 191 |
| Tbg972.7.1880 | <i>T. brucei</i> | 61  | 200 | 260 |
| Tbg972.7.1905 | <i>T. brucei</i> | 56  | 29  | 84  |
| Tbg972.7.1910 | <i>T. brucei</i> | 41  | 434 | 474 |
| Tbg972.7.1930 | <i>T. brucei</i> | 48  | 110 | 157 |
| Tbg972.7.1940 | <i>T. brucei</i> | 51  | 1   | 51  |
| Tbg972.7.1950 | <i>T. brucei</i> | 51  | 1   | 51  |
| Tbg972.7.1960 | <i>T. brucei</i> | 51  | 1   | 51  |
| Tbg972.7.1980 | <i>T. brucei</i> | 51  | 1   | 51  |
| Tbg972.7.20   | <i>T. brucei</i> | 241 | 37  | 277 |
| Tbg972.7.2000 | <i>T. brucei</i> | 51  | 1   | 51  |
| Tbg972.7.2010 | <i>T. brucei</i> | 51  | 1   | 51  |
| Tbg972.7.2030 | <i>T. brucei</i> | 51  | 1   | 51  |
| Tbg972.7.2040 | <i>T. brucei</i> | 51  | 1   | 51  |
| Tbg972.7.2050 | <i>T. brucei</i> | 51  | 1   | 51  |
| Tbg972.7.2070 | <i>T. brucei</i> | 51  | 1   | 51  |
| Tbg972.7.2090 | <i>T. brucei</i> | 51  | 1   | 51  |
| Tbg972.7.210  | <i>T. brucei</i> | 52  | 29  | 80  |
| Tbg972.7.2100 | <i>T. brucei</i> | 51  | 1   | 51  |
| Tbg972.7.2115 | <i>T. brucei</i> | 51  | 1   | 51  |
| Tbg972.7.2120 | <i>T. brucei</i> | 51  | 1   | 51  |
| Tbg972.7.2125 | <i>T. brucei</i> | 51  | 1   | 51  |
| Tbg972.7.2140 | <i>T. brucei</i> | 51  | 1   | 51  |
| Tbg972.7.2150 | <i>T. brucei</i> | 51  | 1   | 51  |
| Tbg972.7.2160 | <i>T. brucei</i> | 51  | 1   | 51  |
| Tbg972.7.2180 | <i>T. brucei</i> | 51  | 1   | 51  |
| Tbg972.7.2190 | <i>T. brucei</i> | 51  | 1   | 51  |
| Tbg972.7.220  | <i>T. brucei</i> | 64  | 1   | 64  |
| Tbg972.7.2200 | <i>T. brucei</i> | 51  | 1   | 51  |
| Tbg972.7.2210 | <i>T. brucei</i> | 51  | 1   | 51  |
| Tbg972.7.2230 | <i>T. brucei</i> | 180 | 103 | 282 |
| Tbg972.7.2230 | <i>T. brucei</i> | 164 | 290 | 453 |
| Tbg972.7.2230 | <i>T. brucei</i> | 54  | 478 | 531 |
| Tbg972.7.2240 | <i>T. brucei</i> | 48  | 219 | 266 |
| Tbg972.7.2250 | <i>T. brucei</i> | 42  | 20  | 61  |

|               |                  |     |      |      |
|---------------|------------------|-----|------|------|
| Tbg972.7.2260 | <i>T. brucei</i> | 63  | 66   | 128  |
| Tbg972.7.2260 | <i>T. brucei</i> | 45  | 278  | 322  |
| Tbg972.7.2260 | <i>T. brucei</i> | 45  | 278  | 322  |
| Tbg972.7.2280 | <i>T. brucei</i> | 43  | 1    | 43   |
| Tbg972.7.2295 | <i>T. brucei</i> | 60  | 34   | 93   |
| Tbg972.7.2300 | <i>T. brucei</i> | 251 | 1    | 251  |
| Tbg972.7.2310 | <i>T. brucei</i> | 58  | 47   | 104  |
| Tbg972.7.2320 | <i>T. brucei</i> | 189 | 70   | 258  |
| Tbg972.7.2330 | <i>T. brucei</i> | 46  | 1    | 46   |
| Tbg972.7.2360 | <i>T. brucei</i> | 99  | 183  | 281  |
| Tbg972.7.2360 | <i>T. brucei</i> | 79  | 298  | 376  |
| Tbg972.7.2390 | <i>T. brucei</i> | 739 | 1    | 739  |
| Tbg972.7.2390 | <i>T. brucei</i> | 56  | 1191 | 1246 |
| Tbg972.7.2400 | <i>T. brucei</i> | 77  | 1    | 77   |
| Tbg972.7.2400 | <i>T. brucei</i> | 59  | 107  | 165  |
| Tbg972.7.2410 | <i>T. brucei</i> | 83  | 1    | 83   |
| Tbg972.7.2410 | <i>T. brucei</i> | 66  | 168  | 233  |
| Tbg972.7.2410 | <i>T. brucei</i> | 43  | 338  | 380  |
| Tbg972.7.2410 | <i>T. brucei</i> | 124 | 890  | 1013 |
| Tbg972.7.2410 | <i>T. brucei</i> | 141 | 1341 | 1481 |
| Tbg972.7.2420 | <i>T. brucei</i> | 230 | 21   | 250  |
| Tbg972.7.2440 | <i>T. brucei</i> | 45  | 13   | 57   |
| Tbg972.7.2440 | <i>T. brucei</i> | 51  | 216  | 266  |
| Tbg972.7.2440 | <i>T. brucei</i> | 51  | 216  | 266  |
| Tbg972.7.2475 | <i>T. brucei</i> | 49  | 1    | 49   |
| Tbg972.7.2490 | <i>T. brucei</i> | 57  | 1    | 57   |
| Tbg972.7.2490 | <i>T. brucei</i> | 56  | 489  | 544  |
| Tbg972.7.250  | <i>T. brucei</i> | 43  | 18   | 60   |
| Tbg972.7.2510 | <i>T. brucei</i> | 43  | 407  | 449  |
| Tbg972.7.2520 | <i>T. brucei</i> | 40  | 121  | 160  |
| Tbg972.7.2530 | <i>T. brucei</i> | 48  | 1    | 48   |
| Tbg972.7.2530 | <i>T. brucei</i> | 102 | 50   | 151  |
| Tbg972.7.2530 | <i>T. brucei</i> | 102 | 50   | 151  |
| Tbg972.7.2540 | <i>T. brucei</i> | 66  | 1    | 66   |
| Tbg972.7.2540 | <i>T. brucei</i> | 45  | 102  | 146  |
| Tbg972.7.2540 | <i>T. brucei</i> | 56  | 180  | 235  |
| Tbg972.7.2560 | <i>T. brucei</i> | 40  | 1    | 40   |
| Tbg972.7.2560 | <i>T. brucei</i> | 40  | 203  | 242  |
| Tbg972.7.2560 | <i>T. brucei</i> | 46  | 443  | 488  |
| Tbg972.7.2560 | <i>T. brucei</i> | 69  | 629  | 697  |
| Tbg972.7.2570 | <i>T. brucei</i> | 41  | 381  | 421  |
| Tbg972.7.2580 | <i>T. brucei</i> | 82  | 16   | 97   |
| Tbg972.7.2580 | <i>T. brucei</i> | 41  | 169  | 209  |
| Tbg972.7.2580 | <i>T. brucei</i> | 44  | 372  | 415  |
| Tbg972.7.2580 | <i>T. brucei</i> | 56  | 462  | 517  |
| Tbg972.7.2590 | <i>T. brucei</i> | 86  | 1    | 86   |
| Tbg972.7.2590 | <i>T. brucei</i> | 196 | 326  | 521  |

|               |                  |     |      |      |
|---------------|------------------|-----|------|------|
| Tbg972.7.2590 | <i>T. brucei</i> | 40  | 1626 | 1665 |
| Tbg972.7.2600 | <i>T. brucei</i> | 147 | 1    | 147  |
| Tbg972.7.2600 | <i>T. brucei</i> | 200 | 387  | 586  |
| Tbg972.7.2600 | <i>T. brucei</i> | 40  | 1298 | 1337 |
| Tbg972.7.2610 | <i>T. brucei</i> | 46  | 38   | 83   |
| Tbg972.7.2620 | <i>T. brucei</i> | 124 | 1    | 124  |
| Tbg972.7.2620 | <i>T. brucei</i> | 85  | 158  | 242  |
| Tbg972.7.2620 | <i>T. brucei</i> | 41  | 291  | 331  |
| Tbg972.7.2620 | <i>T. brucei</i> | 45  | 815  | 859  |
| Tbg972.7.2620 | <i>T. brucei</i> | 76  | 899  | 974  |
| Tbg972.7.2630 | <i>T. brucei</i> | 85  | 1    | 85   |
| Tbg972.7.2640 | <i>T. brucei</i> | 46  | 58   | 103  |
| Tbg972.7.2650 | <i>T. brucei</i> | 45  | 1    | 45   |
| Tbg972.7.2650 | <i>T. brucei</i> | 68  | 55   | 122  |
| Tbg972.7.2650 | <i>T. brucei</i> | 68  | 55   | 122  |
| Tbg972.7.2660 | <i>T. brucei</i> | 317 | 524  | 840  |
| Tbg972.7.2670 | <i>T. brucei</i> | 76  | 191  | 266  |
| Tbg972.7.2680 | <i>T. brucei</i> | 51  | 1    | 51   |
| Tbg972.7.2680 | <i>T. brucei</i> | 69  | 57   | 125  |
| Tbg972.7.2680 | <i>T. brucei</i> | 47  | 354  | 400  |
| Tbg972.7.270  | <i>T. brucei</i> | 87  | 49   | 135  |
| Tbg972.7.270  | <i>T. brucei</i> | 83  | 197  | 279  |
| Tbg972.7.2700 | <i>T. brucei</i> | 53  | 1    | 53   |
| Tbg972.7.2700 | <i>T. brucei</i> | 51  | 350  | 400  |
| Tbg972.7.2700 | <i>T. brucei</i> | 51  | 350  | 400  |
| Tbg972.7.2730 | <i>T. brucei</i> | 258 | 1    | 258  |
| Tbg972.7.2740 | <i>T. brucei</i> | 45  | 99   | 143  |
| Tbg972.7.2750 | <i>T. brucei</i> | 72  | 261  | 332  |
| Tbg972.7.2750 | <i>T. brucei</i> | 43  | 370  | 412  |
| Tbg972.7.2750 | <i>T. brucei</i> | 43  | 370  | 412  |
| Tbg972.7.2760 | <i>T. brucei</i> | 62  | 220  | 281  |
| Tbg972.7.2760 | <i>T. brucei</i> | 45  | 307  | 351  |
| Tbg972.7.2760 | <i>T. brucei</i> | 45  | 307  | 351  |
| Tbg972.7.2770 | <i>T. brucei</i> | 106 | 140  | 245  |
| Tbg972.7.2780 | <i>T. brucei</i> | 86  | 550  | 635  |
| Tbg972.7.2790 | <i>T. brucei</i> | 46  | 308  | 353  |
| Tbg972.7.2810 | <i>T. brucei</i> | 42  | 1    | 42   |
| Tbg972.7.2810 | <i>T. brucei</i> | 54  | 244  | 297  |
| Tbg972.7.2810 | <i>T. brucei</i> | 54  | 244  | 297  |
| Tbg972.7.2820 | <i>T. brucei</i> | 40  | 147  | 186  |
| Tbg972.7.2825 | <i>T. brucei</i> | 60  | 44   | 103  |
| Tbg972.7.2830 | <i>T. brucei</i> | 60  | 1    | 60   |
| Tbg972.7.2830 | <i>T. brucei</i> | 52  | 171  | 222  |
| Tbg972.7.2830 | <i>T. brucei</i> | 52  | 171  | 222  |
| Tbg972.7.2860 | <i>T. brucei</i> | 131 | 1    | 131  |
| Tbg972.7.2870 | <i>T. brucei</i> | 80  | 1    | 80   |
| Tbg972.7.2870 | <i>T. brucei</i> | 43  | 202  | 244  |

|               |                  |     |      |      |
|---------------|------------------|-----|------|------|
| Tbg972.7.2870 | <i>T. brucei</i> | 43  | 202  | 244  |
| Tbg972.7.290  | <i>T. brucei</i> | 84  | 49   | 132  |
| Tbg972.7.290  | <i>T. brucei</i> | 109 | 198  | 306  |
| Tbg972.7.2910 | <i>T. brucei</i> | 47  | 1    | 47   |
| Tbg972.7.2910 | <i>T. brucei</i> | 112 | 125  | 236  |
| Tbg972.7.2910 | <i>T. brucei</i> | 92  | 286  | 377  |
| Tbg972.7.2920 | <i>T. brucei</i> | 43  | 128  | 170  |
| Tbg972.7.2930 | <i>T. brucei</i> | 42  | 95   | 136  |
| Tbg972.7.2940 | <i>T. brucei</i> | 78  | 1    | 78   |
| Tbg972.7.2950 | <i>T. brucei</i> | 106 | 99   | 204  |
| Tbg972.7.2950 | <i>T. brucei</i> | 177 | 216  | 392  |
| Tbg972.7.2970 | <i>T. brucei</i> | 110 | 1    | 110  |
| Tbg972.7.2970 | <i>T. brucei</i> | 142 | 444  | 585  |
| Tbg972.7.2970 | <i>T. brucei</i> | 61  | 660  | 720  |
| Tbg972.7.2970 | <i>T. brucei</i> | 51  | 727  | 777  |
| Tbg972.7.2970 | <i>T. brucei</i> | 74  | 822  | 895  |
| Tbg972.7.2980 | <i>T. brucei</i> | 88  | 1    | 88   |
| Tbg972.7.2980 | <i>T. brucei</i> | 98  | 102  | 199  |
| Tbg972.7.2980 | <i>T. brucei</i> | 148 | 284  | 431  |
| Tbg972.7.2990 | <i>T. brucei</i> | 72  | 72   | 143  |
| Tbg972.7.2990 | <i>T. brucei</i> | 72  | 263  | 334  |
| Tbg972.7.2990 | <i>T. brucei</i> | 342 | 518  | 859  |
| Tbg972.7.2990 | <i>T. brucei</i> | 66  | 973  | 1038 |
| Tbg972.7.2990 | <i>T. brucei</i> | 110 | 1052 | 1161 |
| Tbg972.7.2990 | <i>T. brucei</i> | 68  | 1171 | 1238 |
| Tbg972.7.2990 | <i>T. brucei</i> | 82  | 1262 | 1343 |
| Tbg972.7.300  | <i>T. brucei</i> | 58  | 119  | 176  |
| Tbg972.7.3000 | <i>T. brucei</i> | 55  | 152  | 206  |
| Tbg972.7.3000 | <i>T. brucei</i> | 73  | 385  | 457  |
| Tbg972.7.3000 | <i>T. brucei</i> | 115 | 562  | 676  |
| Tbg972.7.3020 | <i>T. brucei</i> | 79  | 216  | 294  |
| Tbg972.7.3020 | <i>T. brucei</i> | 40  | 319  | 358  |
| Tbg972.7.3020 | <i>T. brucei</i> | 40  | 319  | 358  |
| Tbg972.7.3028 | <i>T. brucei</i> | 63  | 1    | 63   |
| Tbg972.7.3030 | <i>T. brucei</i> | 50  | 217  | 266  |
| Tbg972.7.3030 | <i>T. brucei</i> | 65  | 301  | 365  |
| Tbg972.7.3030 | <i>T. brucei</i> | 81  | 381  | 461  |
| Tbg972.7.3036 | <i>T. brucei</i> | 81  | 105  | 185  |
| Tbg972.7.3040 | <i>T. brucei</i> | 40  | 140  | 179  |
| Tbg972.7.3040 | <i>T. brucei</i> | 49  | 228  | 276  |
| Tbg972.7.3040 | <i>T. brucei</i> | 219 | 425  | 643  |
| Tbg972.7.3090 | <i>T. brucei</i> | 40  | 232  | 271  |
| Tbg972.7.3100 | <i>T. brucei</i> | 41  | 1    | 41   |
| Tbg972.7.3100 | <i>T. brucei</i> | 55  | 204  | 258  |
| Tbg972.7.3100 | <i>T. brucei</i> | 55  | 204  | 258  |
| Tbg972.7.3108 | <i>T. brucei</i> | 50  | 77   | 126  |
| Tbg972.7.3140 | <i>T. brucei</i> | 62  | 1    | 62   |

|               |                  |     |      |      |
|---------------|------------------|-----|------|------|
| Tbg972.7.3170 | <i>T. brucei</i> | 74  | 77   | 150  |
| Tbg972.7.3180 | <i>T. brucei</i> | 73  | 1    | 73   |
| Tbg972.7.3190 | <i>T. brucei</i> | 168 | 1    | 168  |
| Tbg972.7.3190 | <i>T. brucei</i> | 40  | 371  | 410  |
| Tbg972.7.3190 | <i>T. brucei</i> | 83  | 456  | 538  |
| Tbg972.7.320  | <i>T. brucei</i> | 43  | 255  | 297  |
| Tbg972.7.3200 | <i>T. brucei</i> | 60  | 42   | 101  |
| Tbg972.7.3210 | <i>T. brucei</i> | 129 | 1    | 129  |
| Tbg972.7.3210 | <i>T. brucei</i> | 188 | 159  | 346  |
| Tbg972.7.3220 | <i>T. brucei</i> | 45  | 90   | 134  |
| Tbg972.7.3230 | <i>T. brucei</i> | 46  | 89   | 134  |
| Tbg972.7.3240 | <i>T. brucei</i> | 46  | 89   | 134  |
| Tbg972.7.3250 | <i>T. brucei</i> | 46  | 89   | 134  |
| Tbg972.7.3260 | <i>T. brucei</i> | 46  | 89   | 134  |
| Tbg972.7.3270 | <i>T. brucei</i> | 45  | 406  | 450  |
| Tbg972.7.3270 | <i>T. brucei</i> | 54  | 554  | 607  |
| Tbg972.7.3270 | <i>T. brucei</i> | 54  | 554  | 607  |
| Tbg972.7.3320 | <i>T. brucei</i> | 57  | 1    | 57   |
| Tbg972.7.3340 | <i>T. brucei</i> | 44  | 1    | 44   |
| Tbg972.7.3350 | <i>T. brucei</i> | 49  | 317  | 365  |
| Tbg972.7.3350 | <i>T. brucei</i> | 76  | 1090 | 1165 |
| Tbg972.7.3370 | <i>T. brucei</i> | 42  | 1    | 42   |
| Tbg972.7.3370 | <i>T. brucei</i> | 72  | 127  | 198  |
| Tbg972.7.3370 | <i>T. brucei</i> | 72  | 127  | 198  |
| Tbg972.7.3390 | <i>T. brucei</i> | 126 | 55   | 180  |
| Tbg972.7.3390 | <i>T. brucei</i> | 64  | 264  | 327  |
| Tbg972.7.340  | <i>T. brucei</i> | 66  | 395  | 460  |
| Tbg972.7.3400 | <i>T. brucei</i> | 44  | 21   | 64   |
| Tbg972.7.3400 | <i>T. brucei</i> | 57  | 102  | 158  |
| Tbg972.7.3400 | <i>T. brucei</i> | 41  | 354  | 394  |
| Tbg972.7.3420 | <i>T. brucei</i> | 58  | 41   | 98   |
| Tbg972.7.3420 | <i>T. brucei</i> | 228 | 218  | 445  |
| Tbg972.7.3420 | <i>T. brucei</i> | 47  | 562  | 608  |
| Tbg972.7.3430 | <i>T. brucei</i> | 50  | 227  | 276  |
| Tbg972.7.3450 | <i>T. brucei</i> | 54  | 1    | 54   |
| Tbg972.7.3450 | <i>T. brucei</i> | 329 | 117  | 445  |
| Tbg972.7.3450 | <i>T. brucei</i> | 157 | 462  | 618  |
| Tbg972.7.3450 | <i>T. brucei</i> | 319 | 637  | 955  |
| Tbg972.7.3470 | <i>T. brucei</i> | 48  | 440  | 487  |
| Tbg972.7.3490 | <i>T. brucei</i> | 91  | 98   | 188  |
| Tbg972.7.3490 | <i>T. brucei</i> | 48  | 620  | 667  |
| Tbg972.7.3490 | <i>T. brucei</i> | 57  | 1455 | 1511 |
| Tbg972.7.3490 | <i>T. brucei</i> | 65  | 2708 | 2772 |
| Tbg972.7.3490 | <i>T. brucei</i> | 63  | 3409 | 3471 |
| Tbg972.7.3490 | <i>T. brucei</i> | 43  | 3570 | 3612 |
| Tbg972.7.3490 | <i>T. brucei</i> | 120 | 3629 | 3748 |
| Tbg972.7.3490 | <i>T. brucei</i> | 41  | 3868 | 3908 |



|               |                  |     |      |      |
|---------------|------------------|-----|------|------|
| Tbg972.7.3490 | <i>T. brucei</i> | 50  | 5189 | 5238 |
| Tbg972.7.350  | <i>T. brucei</i> | 50  | 76   | 125  |
| Tbg972.7.350  | <i>T. brucei</i> | 61  | 138  | 198  |
| Tbg972.7.350  | <i>T. brucei</i> | 595 | 382  | 976  |
| Tbg972.7.3520 | <i>T. brucei</i> | 63  | 1    | 63   |
| Tbg972.7.3520 | <i>T. brucei</i> | 56  | 387  | 442  |
| Tbg972.7.3520 | <i>T. brucei</i> | 66  | 524  | 589  |
| Tbg972.7.3530 | <i>T. brucei</i> | 55  | 300  | 354  |
| Tbg972.7.3540 | <i>T. brucei</i> | 188 | 352  | 539  |
| Tbg972.7.3540 | <i>T. brucei</i> | 48  | 567  | 614  |
| Tbg972.7.3544 | <i>T. brucei</i> | 57  | 26   | 82   |
| Tbg972.7.3560 | <i>T. brucei</i> | 220 | 35   | 254  |
| Tbg972.7.3560 | <i>T. brucei</i> | 48  | 298  | 345  |
| Tbg972.7.3560 | <i>T. brucei</i> | 77  | 821  | 897  |
| Tbg972.7.3590 | <i>T. brucei</i> | 53  | 40   | 92   |
| Tbg972.7.3590 | <i>T. brucei</i> | 44  | 172  | 215  |
| Tbg972.7.3590 | <i>T. brucei</i> | 66  | 679  | 744  |
| Tbg972.7.360  | <i>T. brucei</i> | 88  | 74   | 161  |
| Tbg972.7.3600 | <i>T. brucei</i> | 47  | 120  | 166  |
| Tbg972.7.3600 | <i>T. brucei</i> | 52  | 736  | 787  |
| Tbg972.7.3600 | <i>T. brucei</i> | 52  | 736  | 787  |
| Tbg972.7.3620 | <i>T. brucei</i> | 530 | 137  | 666  |
| Tbg972.7.3620 | <i>T. brucei</i> | 89  | 699  | 787  |
| Tbg972.7.3630 | <i>T. brucei</i> | 64  | 119  | 182  |
| Tbg972.7.3630 | <i>T. brucei</i> | 63  | 239  | 301  |
| Tbg972.7.3630 | <i>T. brucei</i> | 52  | 312  | 363  |
| Tbg972.7.3640 | <i>T. brucei</i> | 60  | 1    | 60   |
| Tbg972.7.3650 | <i>T. brucei</i> | 47  | 87   | 133  |
| Tbg972.7.3660 | <i>T. brucei</i> | 52  | 94   | 145  |
| Tbg972.7.3660 | <i>T. brucei</i> | 138 | 402  | 539  |
| Tbg972.7.3660 | <i>T. brucei</i> | 831 | 625  | 1455 |
| Tbg972.7.3660 | <i>T. brucei</i> | 710 | 2760 | 3469 |
| Tbg972.7.3660 | <i>T. brucei</i> | 211 | 3505 | 3715 |
| Tbg972.7.3660 | <i>T. brucei</i> | 75  | 3847 | 3921 |
| Tbg972.7.3660 | <i>T. brucei</i> | 63  | 3925 | 3987 |
| Tbg972.7.3660 | <i>T. brucei</i> | 77  | 4024 | 4100 |
| Tbg972.7.3660 | <i>T. brucei</i> | 51  | 4160 | 4210 |
| Tbg972.7.3670 | <i>T. brucei</i> | 144 | 1    | 144  |
| Tbg972.7.3680 | <i>T. brucei</i> | 108 | 250  | 357  |
| Tbg972.7.3700 | <i>T. brucei</i> | 78  | 1    | 78   |
| Tbg972.7.3700 | <i>T. brucei</i> | 87  | 116  | 202  |
| Tbg972.7.3700 | <i>T. brucei</i> | 248 | 245  | 492  |
| Tbg972.7.3700 | <i>T. brucei</i> | 50  | 494  | 543  |
| Tbg972.7.3710 | <i>T. brucei</i> | 153 | 124  | 276  |
| Tbg972.7.3730 | <i>T. brucei</i> | 78  | 14   | 91   |
| Tbg972.7.3740 | <i>T. brucei</i> | 56  | 94   | 149  |
| Tbg972.7.3770 | <i>T. brucei</i> | 106 | 139  | 244  |

|               |                  |     |      |      |
|---------------|------------------|-----|------|------|
| Tbg972.7.3780 | <i>T. brucei</i> | 59  | 137  | 195  |
| Tbg972.7.3790 | <i>T. brucei</i> | 93  | 357  | 449  |
| Tbg972.7.3810 | <i>T. brucei</i> | 60  | 1    | 60   |
| Tbg972.7.3810 | <i>T. brucei</i> | 66  | 66   | 131  |
| Tbg972.7.3830 | <i>T. brucei</i> | 47  | 1    | 47   |
| Tbg972.7.3835 | <i>T. brucei</i> | 66  | 1    | 66   |
| Tbg972.7.3840 | <i>T. brucei</i> | 44  | 20   | 63   |
| Tbg972.7.3860 | <i>T. brucei</i> | 48  | 33   | 80   |
| Tbg972.7.3860 | <i>T. brucei</i> | 56  | 234  | 289  |
| Tbg972.7.3860 | <i>T. brucei</i> | 57  | 336  | 392  |
| Tbg972.7.3860 | <i>T. brucei</i> | 72  | 411  | 482  |
| Tbg972.7.3880 | <i>T. brucei</i> | 50  | 19   | 68   |
| Tbg972.7.390  | <i>T. brucei</i> | 50  | 1    | 50   |
| Tbg972.7.3900 | <i>T. brucei</i> | 43  | 18   | 60   |
| Tbg972.7.3900 | <i>T. brucei</i> | 100 | 93   | 192  |
| Tbg972.7.3930 | <i>T. brucei</i> | 91  | 48   | 138  |
| Tbg972.7.3930 | <i>T. brucei</i> | 45  | 427  | 471  |
| Tbg972.7.3930 | <i>T. brucei</i> | 751 | 555  | 1305 |
| Tbg972.7.3940 | <i>T. brucei</i> | 127 | 759  | 885  |
| Tbg972.7.3940 | <i>T. brucei</i> | 111 | 942  | 1052 |
| Tbg972.7.3940 | <i>T. brucei</i> | 177 | 1116 | 1292 |
| Tbg972.7.3940 | <i>T. brucei</i> | 88  | 1414 | 1501 |
| Tbg972.7.3940 | <i>T. brucei</i> | 95  | 1626 | 1720 |
| Tbg972.7.3958 | <i>T. brucei</i> | 101 | 26   | 126  |
| Tbg972.7.40   | <i>T. brucei</i> | 111 | 97   | 207  |
| Tbg972.7.400  | <i>T. brucei</i> | 40  | 1    | 40   |
| Tbg972.7.400  | <i>T. brucei</i> | 61  | 212  | 272  |
| Tbg972.7.400  | <i>T. brucei</i> | 52  | 874  | 925  |
| Tbg972.7.400  | <i>T. brucei</i> | 111 | 1348 | 1458 |
| Tbg972.7.4010 | <i>T. brucei</i> | 82  | 1    | 82   |
| Tbg972.7.4010 | <i>T. brucei</i> | 42  | 112  | 153  |
| Tbg972.7.4010 | <i>T. brucei</i> | 42  | 112  | 153  |
| Tbg972.7.4020 | <i>T. brucei</i> | 57  | 223  | 279  |
| Tbg972.7.4020 | <i>T. brucei</i> | 45  | 653  | 697  |
| Tbg972.7.4020 | <i>T. brucei</i> | 45  | 653  | 697  |
| Tbg972.7.4040 | <i>T. brucei</i> | 62  | 93   | 154  |
| Tbg972.7.4040 | <i>T. brucei</i> | 88  | 441  | 528  |
| Tbg972.7.4040 | <i>T. brucei</i> | 88  | 441  | 528  |
| Tbg972.7.4050 | <i>T. brucei</i> | 66  | 22   | 87   |
| Tbg972.7.4050 | <i>T. brucei</i> | 137 | 100  | 236  |
| Tbg972.7.4060 | <i>T. brucei</i> | 224 | 1    | 224  |
| Tbg972.7.4060 | <i>T. brucei</i> | 150 | 488  | 637  |
| Tbg972.7.4080 | <i>T. brucei</i> | 50  | 26   | 75   |
| Tbg972.7.4080 | <i>T. brucei</i> | 71  | 165  | 235  |
| Tbg972.7.4080 | <i>T. brucei</i> | 273 | 361  | 633  |
| Tbg972.7.4090 | <i>T. brucei</i> | 67  | 259  | 325  |
| Tbg972.7.4090 | <i>T. brucei</i> | 56  | 419  | 474  |

|               |                  |      |     |      |
|---------------|------------------|------|-----|------|
| Tbg972.7.4090 | <i>T. brucei</i> | 56   | 419 | 474  |
| Tbg972.7.410  | <i>T. brucei</i> | 58   | 49  | 106  |
| Tbg972.7.4100 | <i>T. brucei</i> | 61   | 64  | 124  |
| Tbg972.7.4120 | <i>T. brucei</i> | 49   | 1   | 49   |
| Tbg972.7.4120 | <i>T. brucei</i> | 81   | 132 | 212  |
| Tbg972.7.4130 | <i>T. brucei</i> | 41   | 404 | 444  |
| Tbg972.7.4140 | <i>T. brucei</i> | 45   | 171 | 215  |
| Tbg972.7.4160 | <i>T. brucei</i> | 67   | 69  | 135  |
| Tbg972.7.4160 | <i>T. brucei</i> | 74   | 227 | 300  |
| Tbg972.7.4170 | <i>T. brucei</i> | 96   | 35  | 130  |
| Tbg972.7.4170 | <i>T. brucei</i> | 154  | 146 | 299  |
| Tbg972.7.4170 | <i>T. brucei</i> | 365  | 315 | 679  |
| Tbg972.7.4190 | <i>T. brucei</i> | 64   | 1   | 64   |
| Tbg972.7.4210 | <i>T. brucei</i> | 69   | 427 | 495  |
| Tbg972.7.4210 | <i>T. brucei</i> | 132  | 556 | 687  |
| Tbg972.7.4220 | <i>T. brucei</i> | 60   | 1   | 60   |
| Tbg972.7.4220 | <i>T. brucei</i> | 41   | 263 | 303  |
| Tbg972.7.4220 | <i>T. brucei</i> | 41   | 263 | 303  |
| Tbg972.7.4230 | <i>T. brucei</i> | 85   | 117 | 201  |
| Tbg972.7.4240 | <i>T. brucei</i> | 50   | 332 | 381  |
| Tbg972.7.4250 | <i>T. brucei</i> | 184  | 1   | 184  |
| Tbg972.7.4250 | <i>T. brucei</i> | 44   | 340 | 383  |
| Tbg972.7.4250 | <i>T. brucei</i> | 56   | 594 | 649  |
| Tbg972.7.4290 | <i>T. brucei</i> | 64   | 1   | 64   |
| Tbg972.7.4290 | <i>T. brucei</i> | 245  | 399 | 643  |
| Tbg972.7.4290 | <i>T. brucei</i> | 3094 | 694 | 3787 |
| Tbg972.7.430  | <i>T. brucei</i> | 42   | 1   | 42   |
| Tbg972.7.430  | <i>T. brucei</i> | 80   | 126 | 205  |
| Tbg972.7.4320 | <i>T. brucei</i> | 46   | 148 | 193  |
| Tbg972.7.4330 | <i>T. brucei</i> | 50   | 1   | 50   |
| Tbg972.7.4330 | <i>T. brucei</i> | 61   | 88  | 148  |
| Tbg972.7.4330 | <i>T. brucei</i> | 61   | 88  | 148  |
| Tbg972.7.4370 | <i>T. brucei</i> | 43   | 462 | 504  |
| Tbg972.7.4380 | <i>T. brucei</i> | 63   | 68  | 130  |
| Tbg972.7.4390 | <i>T. brucei</i> | 44   | 96  | 139  |
| Tbg972.7.4390 | <i>T. brucei</i> | 53   | 866 | 918  |
| Tbg972.7.4390 | <i>T. brucei</i> | 53   | 866 | 918  |
| Tbg972.7.4410 | <i>T. brucei</i> | 189  | 1   | 189  |
| Tbg972.7.4410 | <i>T. brucei</i> | 91   | 698 | 788  |
| Tbg972.7.4430 | <i>T. brucei</i> | 59   | 1   | 59   |
| Tbg972.7.4430 | <i>T. brucei</i> | 154  | 65  | 218  |
| Tbg972.7.4450 | <i>T. brucei</i> | 53   | 91  | 143  |
| Tbg972.7.4465 | <i>T. brucei</i> | 59   | 1   | 59   |
| Tbg972.7.4470 | <i>T. brucei</i> | 262  | 350 | 611  |
| Tbg972.7.4470 | <i>T. brucei</i> | 51   | 731 | 781  |
| Tbg972.7.4480 | <i>T. brucei</i> | 137  | 56  | 192  |
| Tbg972.7.4504 | <i>T. brucei</i> | 79   | 1   | 79   |

|               |                  |     |      |      |
|---------------|------------------|-----|------|------|
| Tbg972.7.4510 | <i>T. brucei</i> | 335 | 1    | 335  |
| Tbg972.7.4510 | <i>T. brucei</i> | 85  | 662  | 746  |
| Tbg972.7.4520 | <i>T. brucei</i> | 58  | 143  | 200  |
| Tbg972.7.4520 | <i>T. brucei</i> | 81  | 221  | 301  |
| Tbg972.7.4520 | <i>T. brucei</i> | 54  | 386  | 439  |
| Tbg972.7.4520 | <i>T. brucei</i> | 42  | 447  | 488  |
| Tbg972.7.4520 | <i>T. brucei</i> | 42  | 497  | 538  |
| Tbg972.7.4530 | <i>T. brucei</i> | 105 | 32   | 136  |
| Tbg972.7.4530 | <i>T. brucei</i> | 53  | 384  | 436  |
| Tbg972.7.4530 | <i>T. brucei</i> | 116 | 440  | 555  |
| Tbg972.7.4530 | <i>T. brucei</i> | 75  | 622  | 696  |
| Tbg972.7.4530 | <i>T. brucei</i> | 70  | 725  | 794  |
| Tbg972.7.4540 | <i>T. brucei</i> | 46  | 54   | 99   |
| Tbg972.7.4540 | <i>T. brucei</i> | 65  | 207  | 271  |
| Tbg972.7.4540 | <i>T. brucei</i> | 62  | 511  | 572  |
| Tbg972.7.4570 | <i>T. brucei</i> | 89  | 88   | 176  |
| Tbg972.7.4570 | <i>T. brucei</i> | 72  | 196  | 267  |
| Tbg972.7.4570 | <i>T. brucei</i> | 103 | 286  | 388  |
| Tbg972.7.4570 | <i>T. brucei</i> | 44  | 638  | 681  |
| Tbg972.7.4570 | <i>T. brucei</i> | 78  | 1008 | 1085 |
| Tbg972.7.4590 | <i>T. brucei</i> | 42  | 1    | 42   |
| Tbg972.7.4590 | <i>T. brucei</i> | 308 | 310  | 617  |
| Tbg972.7.4610 | <i>T. brucei</i> | 179 | 36   | 214  |
| Tbg972.7.4610 | <i>T. brucei</i> | 40  | 308  | 347  |
| Tbg972.7.4610 | <i>T. brucei</i> | 50  | 354  | 403  |
| Tbg972.7.4610 | <i>T. brucei</i> | 47  | 428  | 474  |
| Tbg972.7.4620 | <i>T. brucei</i> | 75  | 221  | 295  |
| Tbg972.7.4620 | <i>T. brucei</i> | 65  | 545  | 609  |
| Tbg972.7.4620 | <i>T. brucei</i> | 125 | 649  | 773  |
| Tbg972.7.4620 | <i>T. brucei</i> | 67  | 835  | 901  |
| Tbg972.7.4630 | <i>T. brucei</i> | 103 | 1    | 103  |
| Tbg972.7.4630 | <i>T. brucei</i> | 365 | 143  | 507  |
| Tbg972.7.4640 | <i>T. brucei</i> | 46  | 1    | 46   |
| Tbg972.7.4640 | <i>T. brucei</i> | 59  | 182  | 240  |
| Tbg972.7.4640 | <i>T. brucei</i> | 43  | 834  | 876  |
| Tbg972.7.4640 | <i>T. brucei</i> | 189 | 910  | 1098 |
| Tbg972.7.4640 | <i>T. brucei</i> | 43  | 2155 | 2197 |
| Tbg972.7.4650 | <i>T. brucei</i> | 55  | 1    | 55   |
| Tbg972.7.4660 | <i>T. brucei</i> | 55  | 28   | 82   |
| Tbg972.7.4660 | <i>T. brucei</i> | 46  | 146  | 191  |
| Tbg972.7.4660 | <i>T. brucei</i> | 44  | 427  | 470  |
| Tbg972.7.4660 | <i>T. brucei</i> | 81  | 657  | 737  |
| Tbg972.7.4660 | <i>T. brucei</i> | 52  | 775  | 826  |
| Tbg972.7.4660 | <i>T. brucei</i> | 111 | 890  | 1000 |
| Tbg972.7.4660 | <i>T. brucei</i> | 53  | 1004 | 1056 |
| Tbg972.7.4660 | <i>T. brucei</i> | 164 | 1088 | 1251 |
| Tbg972.7.470  | <i>T. brucei</i> | 80  | 1    | 80   |

|               |                  |     |      |      |
|---------------|------------------|-----|------|------|
| Tbg972.7.470  | <i>T. brucei</i> | 50  | 136  | 185  |
| Tbg972.7.470  | <i>T. brucei</i> | 156 | 319  | 474  |
| Tbg972.7.4720 | <i>T. brucei</i> | 101 | 94   | 194  |
| Tbg972.7.4730 | <i>T. brucei</i> | 53  | 43   | 95   |
| Tbg972.7.4730 | <i>T. brucei</i> | 83  | 272  | 354  |
| Tbg972.7.4740 | <i>T. brucei</i> | 52  | 1    | 52   |
| Tbg972.7.4750 | <i>T. brucei</i> | 80  | 351  | 430  |
| Tbg972.7.4750 | <i>T. brucei</i> | 56  | 655  | 710  |
| Tbg972.7.4750 | <i>T. brucei</i> | 48  | 874  | 921  |
| Tbg972.7.4770 | <i>T. brucei</i> | 65  | 1    | 65   |
| Tbg972.7.4774 | <i>T. brucei</i> | 63  | 42   | 104  |
| Tbg972.7.4790 | <i>T. brucei</i> | 65  | 1    | 65   |
| Tbg972.7.4800 | <i>T. brucei</i> | 51  | 213  | 263  |
| Tbg972.7.4830 | <i>T. brucei</i> | 51  | 213  | 263  |
| Tbg972.7.4850 | <i>T. brucei</i> | 84  | 47   | 130  |
| Tbg972.7.4850 | <i>T. brucei</i> | 63  | 235  | 297  |
| Tbg972.7.4890 | <i>T. brucei</i> | 156 | 158  | 313  |
| Tbg972.7.4890 | <i>T. brucei</i> | 369 | 323  | 691  |
| Tbg972.7.4890 | <i>T. brucei</i> | 238 | 693  | 930  |
| Tbg972.7.490  | <i>T. brucei</i> | 68  | 106  | 173  |
| Tbg972.7.4900 | <i>T. brucei</i> | 244 | 1    | 244  |
| Tbg972.7.4900 | <i>T. brucei</i> | 42  | 410  | 451  |
| Tbg972.7.4930 | <i>T. brucei</i> | 43  | 288  | 330  |
| Tbg972.7.4940 | <i>T. brucei</i> | 59  | 41   | 99   |
| Tbg972.7.4940 | <i>T. brucei</i> | 105 | 110  | 214  |
| Tbg972.7.4940 | <i>T. brucei</i> | 93  | 268  | 360  |
| Tbg972.7.4940 | <i>T. brucei</i> | 453 | 389  | 841  |
| Tbg972.7.4940 | <i>T. brucei</i> | 40  | 1186 | 1225 |
| Tbg972.7.4950 | <i>T. brucei</i> | 271 | 348  | 618  |
| Tbg972.7.4970 | <i>T. brucei</i> | 334 | 1    | 334  |
| Tbg972.7.4970 | <i>T. brucei</i> | 99  | 398  | 496  |
| Tbg972.7.4980 | <i>T. brucei</i> | 216 | 78   | 293  |
| Tbg972.7.4980 | <i>T. brucei</i> | 70  | 356  | 425  |
| Tbg972.7.4990 | <i>T. brucei</i> | 41  | 246  | 286  |
| Tbg972.7.50   | <i>T. brucei</i> | 42  | 1    | 42   |
| Tbg972.7.500  | <i>T. brucei</i> | 62  | 83   | 144  |
| Tbg972.7.5000 | <i>T. brucei</i> | 59  | 96   | 154  |
| Tbg972.7.5030 | <i>T. brucei</i> | 86  | 217  | 302  |
| Tbg972.7.5030 | <i>T. brucei</i> | 67  | 973  | 1039 |
| Tbg972.7.5040 | <i>T. brucei</i> | 41  | 594  | 634  |
| Tbg972.7.5090 | <i>T. brucei</i> | 102 | 150  | 251  |
| Tbg972.7.5090 | <i>T. brucei</i> | 57  | 525  | 581  |
| Tbg972.7.5090 | <i>T. brucei</i> | 58  | 1037 | 1094 |
| Tbg972.7.5090 | <i>T. brucei</i> | 46  | 1379 | 1424 |
| Tbg972.7.5090 | <i>T. brucei</i> | 179 | 1465 | 1643 |
| Tbg972.7.510  | <i>T. brucei</i> | 45  | 351  | 395  |
| Tbg972.7.5100 | <i>T. brucei</i> | 68  | 1    | 68   |

|               |                  |     |     |     |
|---------------|------------------|-----|-----|-----|
| Tbg972.7.5100 | <i>T. brucei</i> | 75  | 246 | 320 |
| Tbg972.7.5110 | <i>T. brucei</i> | 71  | 1   | 71  |
| Tbg972.7.5110 | <i>T. brucei</i> | 49  | 122 | 170 |
| Tbg972.7.5110 | <i>T. brucei</i> | 64  | 201 | 264 |
| Tbg972.7.5110 | <i>T. brucei</i> | 64  | 287 | 350 |
| Tbg972.7.5110 | <i>T. brucei</i> | 55  | 353 | 407 |
| Tbg972.7.5112 | <i>T. brucei</i> | 51  | 51  | 101 |
| Tbg972.7.5130 | <i>T. brucei</i> | 144 | 225 | 368 |
| Tbg972.7.5140 | <i>T. brucei</i> | 83  | 97  | 179 |
| Tbg972.7.5140 | <i>T. brucei</i> | 51  | 199 | 249 |
| Tbg972.7.5140 | <i>T. brucei</i> | 51  | 199 | 249 |
| Tbg972.7.5150 | <i>T. brucei</i> | 58  | 71  | 128 |
| Tbg972.7.5160 | <i>T. brucei</i> | 76  | 52  | 127 |
| Tbg972.7.5190 | <i>T. brucei</i> | 232 | 1   | 232 |
| Tbg972.7.5190 | <i>T. brucei</i> | 47  | 259 | 305 |
| Tbg972.7.5190 | <i>T. brucei</i> | 138 | 365 | 502 |
| Tbg972.7.520  | <i>T. brucei</i> | 66  | 58  | 123 |
| Tbg972.7.520  | <i>T. brucei</i> | 45  | 206 | 250 |
| Tbg972.7.520  | <i>T. brucei</i> | 45  | 206 | 250 |
| Tbg972.7.5200 | <i>T. brucei</i> | 73  | 355 | 427 |
| Tbg972.7.5210 | <i>T. brucei</i> | 59  | 268 | 326 |
| Tbg972.7.5220 | <i>T. brucei</i> | 281 | 117 | 397 |
| Tbg972.7.5230 | <i>T. brucei</i> | 73  | 97  | 169 |
| Tbg972.7.5250 | <i>T. brucei</i> | 51  | 487 | 537 |
| Tbg972.7.5310 | <i>T. brucei</i> | 49  | 1   | 49  |
| Tbg972.7.5320 | <i>T. brucei</i> | 54  | 81  | 134 |
| Tbg972.7.5330 | <i>T. brucei</i> | 60  | 208 | 267 |
| Tbg972.7.5350 | <i>T. brucei</i> | 67  | 53  | 119 |
| Tbg972.7.5350 | <i>T. brucei</i> | 130 | 146 | 275 |
| Tbg972.7.5370 | <i>T. brucei</i> | 107 | 1   | 107 |
| Tbg972.7.5380 | <i>T. brucei</i> | 40  | 23  | 62  |
| Tbg972.7.5380 | <i>T. brucei</i> | 66  | 173 | 238 |
| Tbg972.7.5380 | <i>T. brucei</i> | 66  | 173 | 238 |
| Tbg972.7.5400 | <i>T. brucei</i> | 130 | 1   | 130 |
| Tbg972.7.5420 | <i>T. brucei</i> | 58  | 49  | 106 |
| Tbg972.7.5420 | <i>T. brucei</i> | 84  | 149 | 232 |
| Tbg972.7.5420 | <i>T. brucei</i> | 62  | 270 | 331 |
| Tbg972.7.5430 | <i>T. brucei</i> | 41  | 347 | 387 |
| Tbg972.7.5440 | <i>T. brucei</i> | 47  | 98  | 144 |
| Tbg972.7.5440 | <i>T. brucei</i> | 79  | 177 | 255 |
| Tbg972.7.5440 | <i>T. brucei</i> | 55  | 312 | 366 |
| Tbg972.7.5510 | <i>T. brucei</i> | 136 | 381 | 516 |
| Tbg972.7.5530 | <i>T. brucei</i> | 46  | 119 | 164 |
| Tbg972.7.5530 | <i>T. brucei</i> | 77  | 222 | 298 |
| Tbg972.7.5530 | <i>T. brucei</i> | 77  | 222 | 298 |
| Tbg972.7.5540 | <i>T. brucei</i> | 100 | 1   | 100 |
| Tbg972.7.5550 | <i>T. brucei</i> | 49  | 45  | 93  |

|               |                  |     |      |      |
|---------------|------------------|-----|------|------|
| Tbg972.7.5560 | <i>T. brucei</i> | 144 | 196  | 339  |
| Tbg972.7.560  | <i>T. brucei</i> | 61  | 268  | 328  |
| Tbg972.7.560  | <i>T. brucei</i> | 45  | 364  | 408  |
| Tbg972.7.560  | <i>T. brucei</i> | 40  | 510  | 549  |
| Tbg972.7.560  | <i>T. brucei</i> | 266 | 718  | 983  |
| Tbg972.7.5600 | <i>T. brucei</i> | 45  | 46   | 90   |
| Tbg972.7.5600 | <i>T. brucei</i> | 51  | 294  | 344  |
| Tbg972.7.5600 | <i>T. brucei</i> | 53  | 752  | 804  |
| Tbg972.7.5610 | <i>T. brucei</i> | 44  | 40   | 83   |
| Tbg972.7.5620 | <i>T. brucei</i> | 54  | 61   | 114  |
| Tbg972.7.5630 | <i>T. brucei</i> | 202 | 1187 | 1388 |
| Tbg972.7.5640 | <i>T. brucei</i> | 76  | 294  | 369  |
| Tbg972.7.5650 | <i>T. brucei</i> | 65  | 52   | 116  |
| Tbg972.7.5650 | <i>T. brucei</i> | 50  | 218  | 267  |
| Tbg972.7.5650 | <i>T. brucei</i> | 107 | 391  | 497  |
| Tbg972.7.5650 | <i>T. brucei</i> | 42  | 647  | 688  |
| Tbg972.7.5660 | <i>T. brucei</i> | 84  | 89   | 172  |
| Tbg972.7.5670 | <i>T. brucei</i> | 48  | 857  | 904  |
| Tbg972.7.5691 | <i>T. brucei</i> | 70  | 1    | 70   |
| Tbg972.7.5697 | <i>T. brucei</i> | 48  | 1    | 48   |
| Tbg972.7.570  | <i>T. brucei</i> | 57  | 97   | 153  |
| Tbg972.7.5710 | <i>T. brucei</i> | 65  | 1    | 65   |
| Tbg972.7.5710 | <i>T. brucei</i> | 45  | 218  | 262  |
| Tbg972.7.5710 | <i>T. brucei</i> | 45  | 218  | 262  |
| Tbg972.7.5730 | <i>T. brucei</i> | 228 | 33   | 260  |
| Tbg972.7.5740 | <i>T. brucei</i> | 88  | 31   | 118  |
| Tbg972.7.575  | <i>T. brucei</i> | 62  | 1    | 62   |
| Tbg972.7.5750 | <i>T. brucei</i> | 228 | 33   | 260  |
| Tbg972.7.5760 | <i>T. brucei</i> | 79  | 1    | 79   |
| Tbg972.7.5760 | <i>T. brucei</i> | 220 | 131  | 350  |
| Tbg972.7.5770 | <i>T. brucei</i> | 58  | 1    | 58   |
| Tbg972.7.5770 | <i>T. brucei</i> | 45  | 396  | 440  |
| Tbg972.7.5770 | <i>T. brucei</i> | 102 | 523  | 624  |
| Tbg972.7.5780 | <i>T. brucei</i> | 480 | 384  | 863  |
| Tbg972.7.5780 | <i>T. brucei</i> | 55  | 886  | 940  |
| Tbg972.7.5790 | <i>T. brucei</i> | 49  | 36   | 84   |
| Tbg972.7.580  | <i>T. brucei</i> | 79  | 45   | 123  |
| Tbg972.7.580  | <i>T. brucei</i> | 57  | 308  | 364  |
| Tbg972.7.580  | <i>T. brucei</i> | 55  | 603  | 657  |
| Tbg972.7.580  | <i>T. brucei</i> | 45  | 688  | 732  |
| Tbg972.7.5850 | <i>T. brucei</i> | 66  | 190  | 255  |
| Tbg972.7.5850 | <i>T. brucei</i> | 49  | 274  | 322  |
| Tbg972.7.5860 | <i>T. brucei</i> | 72  | 16   | 87   |
| Tbg972.7.5870 | <i>T. brucei</i> | 60  | 1    | 60   |
| Tbg972.7.5870 | <i>T. brucei</i> | 63  | 133  | 195  |
| Tbg972.7.5870 | <i>T. brucei</i> | 41  | 263  | 303  |
| Tbg972.7.5870 | <i>T. brucei</i> | 138 | 336  | 473  |

|               |                  |     |      |      |
|---------------|------------------|-----|------|------|
| Tbg972.7.5870 | <i>T. brucei</i> | 105 | 531  | 635  |
| Tbg972.7.5870 | <i>T. brucei</i> | 54  | 708  | 761  |
| Tbg972.7.5870 | <i>T. brucei</i> | 42  | 844  | 885  |
| Tbg972.7.5890 | <i>T. brucei</i> | 140 | 1    | 140  |
| Tbg972.7.590  | <i>T. brucei</i> | 46  | 22   | 67   |
| Tbg972.7.590  | <i>T. brucei</i> | 47  | 322  | 368  |
| Tbg972.7.590  | <i>T. brucei</i> | 41  | 401  | 441  |
| Tbg972.7.590  | <i>T. brucei</i> | 67  | 528  | 594  |
| Tbg972.7.5910 | <i>T. brucei</i> | 41  | 102  | 142  |
| Tbg972.7.5920 | <i>T. brucei</i> | 82  | 42   | 123  |
| Tbg972.7.5920 | <i>T. brucei</i> | 138 | 333  | 470  |
| Tbg972.7.5930 | <i>T. brucei</i> | 133 | 50   | 182  |
| Tbg972.7.5930 | <i>T. brucei</i> | 59  | 388  | 446  |
| Tbg972.7.5930 | <i>T. brucei</i> | 66  | 1166 | 1231 |
| Tbg972.7.5930 | <i>T. brucei</i> | 80  | 1251 | 1330 |
| Tbg972.7.5950 | <i>T. brucei</i> | 73  | 1    | 73   |
| Tbg972.7.5960 | <i>T. brucei</i> | 74  | 56   | 129  |
| Tbg972.7.5970 | <i>T. brucei</i> | 66  | 11   | 76   |
| Tbg972.7.5970 | <i>T. brucei</i> | 76  | 512  | 587  |
| Tbg972.7.5970 | <i>T. brucei</i> | 520 | 595  | 1114 |
| Tbg972.7.5970 | <i>T. brucei</i> | 56  | 1129 | 1184 |
| Tbg972.7.5980 | <i>T. brucei</i> | 56  | 136  | 191  |
| Tbg972.7.5980 | <i>T. brucei</i> | 65  | 244  | 308  |
| Tbg972.7.6000 | <i>T. brucei</i> | 45  | 85   | 129  |
| Tbg972.7.6000 | <i>T. brucei</i> | 80  | 275  | 354  |
| Tbg972.7.6000 | <i>T. brucei</i> | 50  | 514  | 563  |
| Tbg972.7.6000 | <i>T. brucei</i> | 97  | 908  | 1004 |
| Tbg972.7.6000 | <i>T. brucei</i> | 80  | 1022 | 1101 |
| Tbg972.7.6000 | <i>T. brucei</i> | 93  | 1259 | 1351 |
| Tbg972.7.6000 | <i>T. brucei</i> | 66  | 1613 | 1678 |
| Tbg972.7.6010 | <i>T. brucei</i> | 45  | 1    | 45   |
| Tbg972.7.6010 | <i>T. brucei</i> | 56  | 147  | 202  |
| Tbg972.7.6010 | <i>T. brucei</i> | 56  | 147  | 202  |
| Tbg972.7.6015 | <i>T. brucei</i> | 57  | 30   | 86   |
| Tbg972.7.6020 | <i>T. brucei</i> | 46  | 65   | 110  |
| Tbg972.7.6020 | <i>T. brucei</i> | 274 | 178  | 451  |
| Tbg972.7.6030 | <i>T. brucei</i> | 53  | 1    | 53   |
| Tbg972.7.6030 | <i>T. brucei</i> | 43  | 85   | 127  |
| Tbg972.7.6040 | <i>T. brucei</i> | 73  | 1    | 73   |
| Tbg972.7.6040 | <i>T. brucei</i> | 492 | 129  | 620  |
| Tbg972.7.6040 | <i>T. brucei</i> | 70  | 662  | 731  |
| Tbg972.7.6050 | <i>T. brucei</i> | 61  | 1    | 61   |
| Tbg972.7.6050 | <i>T. brucei</i> | 51  | 74   | 124  |
| Tbg972.7.6050 | <i>T. brucei</i> | 51  | 74   | 124  |
| Tbg972.7.6060 | <i>T. brucei</i> | 67  | 1    | 67   |
| Tbg972.7.6070 | <i>T. brucei</i> | 69  | 1    | 69   |
| Tbg972.7.6070 | <i>T. brucei</i> | 60  | 248  | 307  |



|               |                  |     |      |      |
|---------------|------------------|-----|------|------|
| Tbg972.7.6070 | <i>T. brucei</i> | 51  | 418  | 468  |
| Tbg972.7.6070 | <i>T. brucei</i> | 66  | 705  | 770  |
| Tbg972.7.6070 | <i>T. brucei</i> | 86  | 803  | 888  |
| Tbg972.7.6070 | <i>T. brucei</i> | 51  | 1388 | 1438 |
| Tbg972.7.6070 | <i>T. brucei</i> | 47  | 1739 | 1785 |
| Tbg972.7.6070 | <i>T. brucei</i> | 72  | 1807 | 1878 |
| Tbg972.7.6070 | <i>T. brucei</i> | 154 | 1913 | 2066 |
| Tbg972.7.6090 | <i>T. brucei</i> | 56  | 1    | 56   |
| Tbg972.7.6090 | <i>T. brucei</i> | 50  | 600  | 649  |
| Tbg972.7.6090 | <i>T. brucei</i> | 50  | 600  | 649  |
| Tbg972.7.610  | <i>T. brucei</i> | 40  | 192  | 231  |
| Tbg972.7.6110 | <i>T. brucei</i> | 461 | 137  | 597  |
| Tbg972.7.6120 | <i>T. brucei</i> | 115 | 94   | 208  |
| Tbg972.7.6120 | <i>T. brucei</i> | 52  | 305  | 356  |
| Tbg972.7.6120 | <i>T. brucei</i> | 52  | 378  | 429  |
| Tbg972.7.6150 | <i>T. brucei</i> | 88  | 473  | 560  |
| Tbg972.7.6150 | <i>T. brucei</i> | 59  | 576  | 634  |
| Tbg972.7.6160 | <i>T. brucei</i> | 100 | 26   | 125  |
| Tbg972.7.6160 | <i>T. brucei</i> | 40  | 432  | 471  |
| Tbg972.7.6160 | <i>T. brucei</i> | 54  | 482  | 535  |
| Tbg972.7.6160 | <i>T. brucei</i> | 60  | 538  | 597  |
| Tbg972.7.6160 | <i>T. brucei</i> | 80  | 646  | 725  |
| Tbg972.7.6170 | <i>T. brucei</i> | 52  | 56   | 107  |
| Tbg972.7.6170 | <i>T. brucei</i> | 61  | 284  | 344  |
| Tbg972.7.6180 | <i>T. brucei</i> | 51  | 52   | 102  |
| Tbg972.7.620  | <i>T. brucei</i> | 223 | 444  | 666  |
| Tbg972.7.6200 | <i>T. brucei</i> | 281 | 1    | 281  |
| Tbg972.7.6200 | <i>T. brucei</i> | 51  | 406  | 456  |
| Tbg972.7.6215 | <i>T. brucei</i> | 56  | 61   | 116  |
| Tbg972.7.6220 | <i>T. brucei</i> | 282 | 1    | 282  |
| Tbg972.7.6220 | <i>T. brucei</i> | 77  | 348  | 424  |
| Tbg972.7.6220 | <i>T. brucei</i> | 51  | 508  | 558  |
| Tbg972.7.6220 | <i>T. brucei</i> | 147 | 583  | 729  |
| Tbg972.7.6220 | <i>T. brucei</i> | 45  | 775  | 819  |
| Tbg972.7.6220 | <i>T. brucei</i> | 211 | 836  | 1046 |
| Tbg972.7.6230 | <i>T. brucei</i> | 65  | 1    | 65   |
| Tbg972.7.6230 | <i>T. brucei</i> | 113 | 107  | 219  |
| Tbg972.7.6230 | <i>T. brucei</i> | 54  | 300  | 353  |
| Tbg972.7.6230 | <i>T. brucei</i> | 52  | 447  | 498  |
| Tbg972.7.6250 | <i>T. brucei</i> | 49  | 384  | 432  |
| Tbg972.7.6250 | <i>T. brucei</i> | 53  | 683  | 735  |
| Tbg972.7.6250 | <i>T. brucei</i> | 53  | 683  | 735  |
| Tbg972.7.6260 | <i>T. brucei</i> | 49  | 201  | 249  |
| Tbg972.7.6260 | <i>T. brucei</i> | 256 | 298  | 553  |
| Tbg972.7.6280 | <i>T. brucei</i> | 105 | 302  | 406  |
| Tbg972.7.6280 | <i>T. brucei</i> | 127 | 414  | 540  |
| Tbg972.7.6290 | <i>T. brucei</i> | 60  | 1    | 60   |

|               |                  |     |      |      |
|---------------|------------------|-----|------|------|
| Tbg972.7.6290 | <i>T. brucei</i> | 71  | 98   | 168  |
| Tbg972.7.6290 | <i>T. brucei</i> | 186 | 220  | 405  |
| Tbg972.7.6290 | <i>T. brucei</i> | 67  | 461  | 527  |
| Tbg972.7.6300 | <i>T. brucei</i> | 68  | 517  | 584  |
| Tbg972.7.6300 | <i>T. brucei</i> | 55  | 639  | 693  |
| Tbg972.7.6300 | <i>T. brucei</i> | 57  | 1396 | 1452 |
| Tbg972.7.6310 | <i>T. brucei</i> | 158 | 231  | 388  |
| Tbg972.7.6310 | <i>T. brucei</i> | 94  | 636  | 729  |
| Tbg972.7.6330 | <i>T. brucei</i> | 72  | 95   | 166  |
| Tbg972.7.6350 | <i>T. brucei</i> | 78  | 224  | 301  |
| Tbg972.7.6380 | <i>T. brucei</i> | 93  | 1    | 93   |
| Tbg972.7.6380 | <i>T. brucei</i> | 93  | 527  | 619  |
| Tbg972.7.6380 | <i>T. brucei</i> | 98  | 735  | 832  |
| Tbg972.7.6380 | <i>T. brucei</i> | 61  | 1118 | 1178 |
| Tbg972.7.6390 | <i>T. brucei</i> | 72  | 213  | 284  |
| Tbg972.7.640  | <i>T. brucei</i> | 68  | 384  | 451  |
| Tbg972.7.6420 | <i>T. brucei</i> | 104 | 232  | 335  |
| Tbg972.7.6440 | <i>T. brucei</i> | 61  | 1    | 61   |
| Tbg972.7.6440 | <i>T. brucei</i> | 42  | 184  | 225  |
| Tbg972.7.6440 | <i>T. brucei</i> | 42  | 184  | 225  |
| Tbg972.7.6452 | <i>T. brucei</i> | 120 | 1    | 120  |
| Tbg972.7.6470 | <i>T. brucei</i> | 43  | 370  | 412  |
| Tbg972.7.6470 | <i>T. brucei</i> | 46  | 426  | 471  |
| Tbg972.7.6470 | <i>T. brucei</i> | 56  | 1467 | 1522 |
| Tbg972.7.6480 | <i>T. brucei</i> | 40  | 270  | 309  |
| Tbg972.7.6480 | <i>T. brucei</i> | 42  | 492  | 533  |
| Tbg972.7.6480 | <i>T. brucei</i> | 115 | 788  | 902  |
| Tbg972.7.6480 | <i>T. brucei</i> | 49  | 978  | 1026 |
| Tbg972.7.6490 | <i>T. brucei</i> | 196 | 1    | 196  |
| Tbg972.7.6490 | <i>T. brucei</i> | 41  | 769  | 809  |
| Tbg972.7.6490 | <i>T. brucei</i> | 80  | 842  | 921  |
| Tbg972.7.650  | <i>T. brucei</i> | 51  | 1    | 51   |
| Tbg972.7.650  | <i>T. brucei</i> | 48  | 327  | 374  |
| Tbg972.7.650  | <i>T. brucei</i> | 66  | 392  | 457  |
| Tbg972.7.650  | <i>T. brucei</i> | 85  | 597  | 681  |
| Tbg972.7.650  | <i>T. brucei</i> | 178 | 1171 | 1348 |
| Tbg972.7.650  | <i>T. brucei</i> | 80  | 1676 | 1755 |
| Tbg972.7.6510 | <i>T. brucei</i> | 72  | 64   | 135  |
| Tbg972.7.6520 | <i>T. brucei</i> | 50  | 436  | 485  |
| Tbg972.7.6540 | <i>T. brucei</i> | 41  | 1    | 41   |
| Tbg972.7.6540 | <i>T. brucei</i> | 190 | 82   | 271  |
| Tbg972.7.6550 | <i>T. brucei</i> | 41  | 340  | 380  |
| Tbg972.7.6550 | <i>T. brucei</i> | 84  | 410  | 493  |
| Tbg972.7.6550 | <i>T. brucei</i> | 84  | 410  | 493  |
| Tbg972.7.6570 | <i>T. brucei</i> | 210 | 1    | 210  |
| Tbg972.7.6570 | <i>T. brucei</i> | 41  | 303  | 343  |
| Tbg972.7.6570 | <i>T. brucei</i> | 65  | 387  | 451  |

|               |                  |     |      |      |
|---------------|------------------|-----|------|------|
| Tbg972.7.6570 | <i>T. brucei</i> | 51  | 525  | 575  |
| Tbg972.7.6590 | <i>T. brucei</i> | 62  | 246  | 307  |
| Tbg972.7.660  | <i>T. brucei</i> | 72  | 222  | 293  |
| Tbg972.7.660  | <i>T. brucei</i> | 53  | 450  | 502  |
| Tbg972.7.660  | <i>T. brucei</i> | 99  | 510  | 608  |
| Tbg972.7.6610 | <i>T. brucei</i> | 120 | 1    | 120  |
| Tbg972.7.6610 | <i>T. brucei</i> | 76  | 161  | 236  |
| Tbg972.7.6610 | <i>T. brucei</i> | 68  | 310  | 377  |
| Tbg972.7.6610 | <i>T. brucei</i> | 62  | 423  | 484  |
| Tbg972.7.6620 | <i>T. brucei</i> | 44  | 277  | 320  |
| Tbg972.7.6660 | <i>T. brucei</i> | 108 | 22   | 129  |
| Tbg972.7.6660 | <i>T. brucei</i> | 167 | 326  | 492  |
| Tbg972.7.6670 | <i>T. brucei</i> | 96  | 309  | 404  |
| Tbg972.7.6670 | <i>T. brucei</i> | 53  | 516  | 568  |
| Tbg972.7.6670 | <i>T. brucei</i> | 53  | 516  | 568  |
| Tbg972.7.6680 | <i>T. brucei</i> | 41  | 61   | 101  |
| Tbg972.7.6680 | <i>T. brucei</i> | 40  | 288  | 327  |
| Tbg972.7.6680 | <i>T. brucei</i> | 40  | 288  | 327  |
| Tbg972.7.670  | <i>T. brucei</i> | 44  | 192  | 235  |
| Tbg972.7.6700 | <i>T. brucei</i> | 67  | 226  | 292  |
| Tbg972.7.6700 | <i>T. brucei</i> | 42  | 407  | 448  |
| Tbg972.7.6700 | <i>T. brucei</i> | 42  | 407  | 448  |
| Tbg972.7.6750 | <i>T. brucei</i> | 107 | 84   | 190  |
| Tbg972.7.6760 | <i>T. brucei</i> | 47  | 135  | 181  |
| Tbg972.7.680  | <i>T. brucei</i> | 256 | 27   | 282  |
| Tbg972.7.680  | <i>T. brucei</i> | 51  | 318  | 368  |
| Tbg972.7.680  | <i>T. brucei</i> | 46  | 607  | 652  |
| Tbg972.7.6800 | <i>T. brucei</i> | 48  | 1    | 48   |
| Tbg972.7.6820 | <i>T. brucei</i> | 171 | 357  | 527  |
| Tbg972.7.6820 | <i>T. brucei</i> | 78  | 546  | 623  |
| Tbg972.7.6840 | <i>T. brucei</i> | 58  | 1    | 58   |
| Tbg972.7.6850 | <i>T. brucei</i> | 49  | 89   | 137  |
| Tbg972.7.6860 | <i>T. brucei</i> | 75  | 27   | 101  |
| Tbg972.7.6860 | <i>T. brucei</i> | 54  | 152  | 205  |
| Tbg972.7.6860 | <i>T. brucei</i> | 48  | 654  | 701  |
| Tbg972.7.6920 | <i>T. brucei</i> | 40  | 566  | 605  |
| Tbg972.7.6995 | <i>T. brucei</i> | 87  | 1    | 87   |
| Tbg972.7.70   | <i>T. brucei</i> | 46  | 136  | 181  |
| Tbg972.7.70   | <i>T. brucei</i> | 51  | 200  | 250  |
| Tbg972.7.70   | <i>T. brucei</i> | 51  | 200  | 250  |
| Tbg972.7.700  | <i>T. brucei</i> | 49  | 1    | 49   |
| Tbg972.7.700  | <i>T. brucei</i> | 55  | 167  | 221  |
| Tbg972.7.700  | <i>T. brucei</i> | 72  | 448  | 519  |
| Tbg972.7.700  | <i>T. brucei</i> | 40  | 530  | 569  |
| Tbg972.7.7010 | <i>T. brucei</i> | 80  | 1190 | 1269 |
| Tbg972.7.7020 | <i>T. brucei</i> | 48  | 1220 | 1267 |
| Tbg972.7.7050 | <i>T. brucei</i> | 88  | 526  | 613  |

|               |                  |     |     |     |
|---------------|------------------|-----|-----|-----|
| Tbg972.7.7050 | <i>T. brucei</i> | 104 | 659 | 762 |
| Tbg972.7.7070 | <i>T. brucei</i> | 115 | 1   | 115 |
| Tbg972.7.710  | <i>T. brucei</i> | 58  | 187 | 244 |
| Tbg972.7.710  | <i>T. brucei</i> | 74  | 271 | 344 |
| Tbg972.7.710  | <i>T. brucei</i> | 74  | 271 | 344 |
| Tbg972.7.7135 | <i>T. brucei</i> | 56  | 99  | 154 |
| Tbg972.7.7140 | <i>T. brucei</i> | 118 | 161 | 278 |
| Tbg972.7.7150 | <i>T. brucei</i> | 53  | 1   | 53  |
| Tbg972.7.7160 | <i>T. brucei</i> | 58  | 1   | 58  |
| Tbg972.7.7160 | <i>T. brucei</i> | 74  | 110 | 183 |
| Tbg972.7.7160 | <i>T. brucei</i> | 74  | 110 | 183 |
| Tbg972.7.7170 | <i>T. brucei</i> | 49  | 61  | 109 |
| Tbg972.7.7180 | <i>T. brucei</i> | 60  | 112 | 171 |
| Tbg972.7.7182 | <i>T. brucei</i> | 47  | 1   | 47  |
| Tbg972.7.7190 | <i>T. brucei</i> | 107 | 439 | 545 |
| Tbg972.7.720  | <i>T. brucei</i> | 50  | 100 | 149 |
| Tbg972.7.7210 | <i>T. brucei</i> | 41  | 391 | 431 |
| Tbg972.7.7220 | <i>T. brucei</i> | 73  | 1   | 73  |
| Tbg972.7.7220 | <i>T. brucei</i> | 300 | 102 | 401 |
| Tbg972.7.7230 | <i>T. brucei</i> | 45  | 1   | 45  |
| Tbg972.7.7240 | <i>T. brucei</i> | 41  | 1   | 41  |
| Tbg972.7.7255 | <i>T. brucei</i> | 126 | 1   | 126 |
| Tbg972.7.7260 | <i>T. brucei</i> | 54  | 166 | 219 |
| Tbg972.7.7260 | <i>T. brucei</i> | 216 | 477 | 692 |
| Tbg972.7.7260 | <i>T. brucei</i> | 105 | 742 | 846 |
| Tbg972.7.7270 | <i>T. brucei</i> | 83  | 1   | 83  |
| Tbg972.7.7270 | <i>T. brucei</i> | 40  | 119 | 158 |
| Tbg972.7.7270 | <i>T. brucei</i> | 40  | 119 | 158 |
| Tbg972.7.7280 | <i>T. brucei</i> | 283 | 110 | 392 |
| Tbg972.7.7290 | <i>T. brucei</i> | 40  | 1   | 40  |
| Tbg972.7.7290 | <i>T. brucei</i> | 82  | 520 | 601 |
| Tbg972.7.7290 | <i>T. brucei</i> | 82  | 520 | 601 |
| Tbg972.7.730  | <i>T. brucei</i> | 108 | 353 | 460 |
| Tbg972.7.7320 | <i>T. brucei</i> | 90  | 39  | 128 |
| Tbg972.7.7320 | <i>T. brucei</i> | 204 | 182 | 385 |
| Tbg972.7.7320 | <i>T. brucei</i> | 49  | 394 | 442 |
| Tbg972.7.7330 | <i>T. brucei</i> | 47  | 227 | 273 |
| Tbg972.7.7350 | <i>T. brucei</i> | 79  | 1   | 79  |
| Tbg972.7.7360 | <i>T. brucei</i> | 141 | 81  | 221 |
| Tbg972.7.7370 | <i>T. brucei</i> | 55  | 1   | 55  |
| Tbg972.7.7370 | <i>T. brucei</i> | 51  | 156 | 206 |
| Tbg972.7.7380 | <i>T. brucei</i> | 46  | 43  | 88  |
| Tbg972.7.7380 | <i>T. brucei</i> | 148 | 251 | 398 |
| Tbg972.7.7380 | <i>T. brucei</i> | 235 | 406 | 640 |
| Tbg972.7.7380 | <i>T. brucei</i> | 62  | 643 | 704 |
| Tbg972.7.7380 | <i>T. brucei</i> | 185 | 728 | 912 |
| Tbg972.7.740  | <i>T. brucei</i> | 47  | 66  | 112 |

|               |                  |     |      |      |
|---------------|------------------|-----|------|------|
| Tbg972.7.740  | <i>T. brucei</i> | 49  | 142  | 190  |
| Tbg972.7.740  | <i>T. brucei</i> | 49  | 142  | 190  |
| Tbg972.7.7440 | <i>T. brucei</i> | 71  | 90   | 160  |
| Tbg972.7.7440 | <i>T. brucei</i> | 51  | 164  | 214  |
| Tbg972.7.7440 | <i>T. brucei</i> | 51  | 164  | 214  |
| Tbg972.7.7450 | <i>T. brucei</i> | 144 | 41   | 184  |
| Tbg972.7.7460 | <i>T. brucei</i> | 157 | 1    | 157  |
| Tbg972.7.7470 | <i>T. brucei</i> | 103 | 225  | 327  |
| Tbg972.7.7485 | <i>T. brucei</i> | 92  | 1    | 92   |
| Tbg972.7.7490 | <i>T. brucei</i> | 40  | 1    | 40   |
| Tbg972.7.7490 | <i>T. brucei</i> | 61  | 110  | 170  |
| Tbg972.7.7490 | <i>T. brucei</i> | 42  | 438  | 479  |
| Tbg972.7.750  | <i>T. brucei</i> | 96  | 27   | 122  |
| Tbg972.7.750  | <i>T. brucei</i> | 67  | 197  | 263  |
| Tbg972.7.750  | <i>T. brucei</i> | 430 | 283  | 712  |
| Tbg972.7.750  | <i>T. brucei</i> | 526 | 821  | 1346 |
| Tbg972.7.7500 | <i>T. brucei</i> | 98  | 167  | 264  |
| Tbg972.7.7510 | <i>T. brucei</i> | 54  | 153  | 206  |
| Tbg972.7.7510 | <i>T. brucei</i> | 47  | 227  | 273  |
| Tbg972.7.7510 | <i>T. brucei</i> | 91  | 303  | 393  |
| Tbg972.7.7520 | <i>T. brucei</i> | 40  | 84   | 123  |
| Tbg972.7.7520 | <i>T. brucei</i> | 90  | 314  | 403  |
| Tbg972.7.7520 | <i>T. brucei</i> | 90  | 314  | 403  |
| Tbg972.7.7530 | <i>T. brucei</i> | 231 | 238  | 468  |
| Tbg972.7.7540 | <i>T. brucei</i> | 47  | 168  | 214  |
| Tbg972.7.7540 | <i>T. brucei</i> | 87  | 398  | 484  |
| Tbg972.7.7540 | <i>T. brucei</i> | 87  | 398  | 484  |
| Tbg972.7.7550 | <i>T. brucei</i> | 50  | 62   | 111  |
| Tbg972.7.7550 | <i>T. brucei</i> | 71  | 142  | 212  |
| Tbg972.7.7550 | <i>T. brucei</i> | 125 | 383  | 507  |
| Tbg972.7.760  | <i>T. brucei</i> | 66  | 29   | 94   |
| Tbg972.7.760  | <i>T. brucei</i> | 75  | 232  | 306  |
| Tbg972.7.7610 | <i>T. brucei</i> | 49  | 155  | 203  |
| Tbg972.7.7620 | <i>T. brucei</i> | 90  | 138  | 227  |
| Tbg972.7.7630 | <i>T. brucei</i> | 83  | 153  | 235  |
| Tbg972.7.7660 | <i>T. brucei</i> | 128 | 141  | 268  |
| Tbg972.7.7670 | <i>T. brucei</i> | 103 | 54   | 156  |
| Tbg972.7.7670 | <i>T. brucei</i> | 48  | 537  | 584  |
| Tbg972.7.7670 | <i>T. brucei</i> | 233 | 665  | 897  |
| Tbg972.7.7680 | <i>T. brucei</i> | 46  | 224  | 269  |
| Tbg972.7.7680 | <i>T. brucei</i> | 44  | 352  | 395  |
| Tbg972.7.7680 | <i>T. brucei</i> | 44  | 352  | 395  |
| Tbg972.7.770  | <i>T. brucei</i> | 44  | 1    | 44   |
| Tbg972.7.770  | <i>T. brucei</i> | 57  | 381  | 437  |
| Tbg972.7.770  | <i>T. brucei</i> | 62  | 696  | 757  |
| Tbg972.7.770  | <i>T. brucei</i> | 49  | 1032 | 1080 |
| Tbg972.7.770  | <i>T. brucei</i> | 88  | 2194 | 2281 |

|               |                  |     |      |      |
|---------------|------------------|-----|------|------|
| Tbg972.7.770  | <i>T. brucei</i> | 61  | 2706 | 2766 |
| Tbg972.7.7700 | <i>T. brucei</i> | 456 | 1    | 456  |
| Tbg972.7.7700 | <i>T. brucei</i> | 178 | 459  | 636  |
| Tbg972.7.7700 | <i>T. brucei</i> | 77  | 675  | 751  |
| Tbg972.7.7705 | <i>T. brucei</i> | 41  | 1    | 41   |
| Tbg972.7.7720 | <i>T. brucei</i> | 55  | 1    | 55   |
| Tbg972.7.7720 | <i>T. brucei</i> | 80  | 124  | 203  |
| Tbg972.7.7720 | <i>T. brucei</i> | 386 | 324  | 709  |
| Tbg972.7.7720 | <i>T. brucei</i> | 323 | 778  | 1100 |
| Tbg972.7.7720 | <i>T. brucei</i> | 149 | 1184 | 1332 |
| Tbg972.7.7720 | <i>T. brucei</i> | 73  | 1364 | 1436 |
| Tbg972.7.7730 | <i>T. brucei</i> | 61  | 40   | 100  |
| Tbg972.7.7750 | <i>T. brucei</i> | 55  | 478  | 532  |
| Tbg972.7.7760 | <i>T. brucei</i> | 49  | 25   | 73   |
| Tbg972.7.7770 | <i>T. brucei</i> | 41  | 1    | 41   |
| Tbg972.7.7780 | <i>T. brucei</i> | 46  | 203  | 248  |
| Tbg972.7.7780 | <i>T. brucei</i> | 95  | 661  | 755  |
| Tbg972.7.7780 | <i>T. brucei</i> | 44  | 850  | 893  |
| Tbg972.7.7780 | <i>T. brucei</i> | 89  | 1060 | 1148 |
| Tbg972.7.7780 | <i>T. brucei</i> | 44  | 1341 | 1384 |
| Tbg972.7.7780 | <i>T. brucei</i> | 55  | 1860 | 1914 |
| Tbg972.7.7780 | <i>T. brucei</i> | 40  | 1981 | 2020 |
| Tbg972.7.7780 | <i>T. brucei</i> | 104 | 2083 | 2186 |
| Tbg972.7.7780 | <i>T. brucei</i> | 45  | 2345 | 2389 |
| Tbg972.7.7780 | <i>T. brucei</i> | 78  | 2479 | 2556 |
| Tbg972.7.7785 | <i>T. brucei</i> | 55  | 79   | 133  |
| Tbg972.7.7790 | <i>T. brucei</i> | 365 | 1    | 365  |
| Tbg972.7.7790 | <i>T. brucei</i> | 47  | 452  | 498  |
| Tbg972.7.7790 | <i>T. brucei</i> | 81  | 526  | 606  |
| Tbg972.7.7794 | <i>T. brucei</i> | 44  | 41   | 84   |
| Tbg972.7.7800 | <i>T. brucei</i> | 488 | 1    | 488  |
| Tbg972.7.7830 | <i>T. brucei</i> | 151 | 1    | 151  |
| Tbg972.7.7830 | <i>T. brucei</i> | 66  | 211  | 276  |
| Tbg972.7.7840 | <i>T. brucei</i> | 218 | 1    | 218  |
| Tbg972.7.7840 | <i>T. brucei</i> | 118 | 245  | 362  |
| Tbg972.7.7850 | <i>T. brucei</i> | 69  | 1    | 69   |
| Tbg972.7.7850 | <i>T. brucei</i> | 219 | 113  | 331  |
| Tbg972.7.7850 | <i>T. brucei</i> | 358 | 369  | 726  |
| Tbg972.7.7860 | <i>T. brucei</i> | 60  | 1    | 60   |
| Tbg972.7.7860 | <i>T. brucei</i> | 41  | 93   | 133  |
| Tbg972.7.7860 | <i>T. brucei</i> | 45  | 609  | 653  |
| Tbg972.7.7860 | <i>T. brucei</i> | 72  | 731  | 802  |
| Tbg972.7.7860 | <i>T. brucei</i> | 132 | 815  | 946  |
| Tbg972.7.7870 | <i>T. brucei</i> | 327 | 13   | 339  |
| Tbg972.7.7870 | <i>T. brucei</i> | 40  | 364  | 403  |
| Tbg972.7.7870 | <i>T. brucei</i> | 110 | 514  | 623  |
| Tbg972.7.7870 | <i>T. brucei</i> | 60  | 662  | 721  |

|               |                  |     |      |      |
|---------------|------------------|-----|------|------|
| Tbg972.7.7875 | <i>T. brucei</i> | 53  | 46   | 98   |
| Tbg972.7.7880 | <i>T. brucei</i> | 48  | 1    | 48   |
| Tbg972.7.7880 | <i>T. brucei</i> | 55  | 195  | 249  |
| Tbg972.7.7880 | <i>T. brucei</i> | 160 | 558  | 717  |
| Tbg972.7.7880 | <i>T. brucei</i> | 179 | 720  | 898  |
| Tbg972.7.7880 | <i>T. brucei</i> | 56  | 931  | 986  |
| Tbg972.7.7880 | <i>T. brucei</i> | 48  | 1087 | 1134 |
| Tbg972.7.7930 | <i>T. brucei</i> | 295 | 14   | 308  |
| Tbg972.7.7930 | <i>T. brucei</i> | 60  | 379  | 438  |
| Tbg972.7.7950 | <i>T. brucei</i> | 109 | 22   | 130  |
| Tbg972.7.7950 | <i>T. brucei</i> | 161 | 270  | 430  |
| Tbg972.7.7960 | <i>T. brucei</i> | 69  | 1    | 69   |
| Tbg972.7.7960 | <i>T. brucei</i> | 69  | 81   | 149  |
| Tbg972.7.7976 | <i>T. brucei</i> | 89  | 1    | 89   |
| Tbg972.7.7990 | <i>T. brucei</i> | 57  | 118  | 174  |
| Tbg972.7.7992 | <i>T. brucei</i> | 123 | 1    | 123  |
| Tbg972.7.7994 | <i>T. brucei</i> | 93  | 56   | 148  |
| Tbg972.7.7996 | <i>T. brucei</i> | 53  | 1    | 53   |
| Tbg972.7.80   | <i>T. brucei</i> | 42  | 132  | 173  |
| Tbg972.7.8010 | <i>T. brucei</i> | 128 | 1    | 128  |
| Tbg972.7.8022 | <i>T. brucei</i> | 108 | 1    | 108  |
| Tbg972.7.8030 | <i>T. brucei</i> | 91  | 1    | 91   |
| Tbg972.7.8030 | <i>T. brucei</i> | 81  | 123  | 203  |
| Tbg972.7.8080 | <i>T. brucei</i> | 156 | 218  | 373  |
| Tbg972.7.8080 | <i>T. brucei</i> | 129 | 410  | 538  |
| Tbg972.7.8085 | <i>T. brucei</i> | 56  | 1    | 56   |
| Tbg972.7.8090 | <i>T. brucei</i> | 56  | 25   | 80   |
| Tbg972.7.8090 | <i>T. brucei</i> | 89  | 129  | 217  |
| Tbg972.7.8090 | <i>T. brucei</i> | 56  | 685  | 740  |
| Tbg972.7.8090 | <i>T. brucei</i> | 72  | 752  | 823  |
| Tbg972.7.810  | <i>T. brucei</i> | 93  | 1    | 93   |
| Tbg972.7.810  | <i>T. brucei</i> | 58  | 146  | 203  |
| Tbg972.7.810  | <i>T. brucei</i> | 60  | 237  | 296  |
| Tbg972.7.810  | <i>T. brucei</i> | 40  | 321  | 360  |
| Tbg972.7.810  | <i>T. brucei</i> | 48  | 486  | 533  |
| Tbg972.7.8100 | <i>T. brucei</i> | 146 | 160  | 305  |
| Tbg972.7.8100 | <i>T. brucei</i> | 62  | 321  | 382  |
| Tbg972.7.8100 | <i>T. brucei</i> | 54  | 397  | 450  |
| Tbg972.7.8100 | <i>T. brucei</i> | 110 | 515  | 624  |
| Tbg972.7.8120 | <i>T. brucei</i> | 56  | 51   | 106  |
| Tbg972.7.8120 | <i>T. brucei</i> | 84  | 407  | 490  |
| Tbg972.7.8120 | <i>T. brucei</i> | 84  | 407  | 490  |
| Tbg972.7.8140 | <i>T. brucei</i> | 69  | 43   | 111  |
| Tbg972.7.8140 | <i>T. brucei</i> | 68  | 216  | 283  |
| Tbg972.7.8140 | <i>T. brucei</i> | 54  | 543  | 596  |
| Tbg972.7.8150 | <i>T. brucei</i> | 41  | 1    | 41   |
| Tbg972.7.8150 | <i>T. brucei</i> | 45  | 79   | 123  |

|               |                  |     |      |      |
|---------------|------------------|-----|------|------|
| Tbg972.7.8150 | <i>T. brucei</i> | 67  | 199  | 265  |
| Tbg972.7.8150 | <i>T. brucei</i> | 251 | 273  | 523  |
| Tbg972.7.8150 | <i>T. brucei</i> | 64  | 556  | 619  |
| Tbg972.7.8150 | <i>T. brucei</i> | 76  | 694  | 769  |
| Tbg972.7.8160 | <i>T. brucei</i> | 57  | 10   | 66   |
| Tbg972.7.8160 | <i>T. brucei</i> | 139 | 179  | 317  |
| Tbg972.7.8190 | <i>T. brucei</i> | 42  | 1    | 42   |
| Tbg972.7.8190 | <i>T. brucei</i> | 66  | 144  | 209  |
| Tbg972.7.8190 | <i>T. brucei</i> | 125 | 290  | 414  |
| Tbg972.7.8190 | <i>T. brucei</i> | 55  | 443  | 497  |
| Tbg972.7.8190 | <i>T. brucei</i> | 44  | 585  | 628  |
| Tbg972.7.820  | <i>T. brucei</i> | 57  | 1    | 57   |
| Tbg972.7.820  | <i>T. brucei</i> | 64  | 67   | 130  |
| Tbg972.7.820  | <i>T. brucei</i> | 64  | 67   | 130  |
| Tbg972.7.8200 | <i>T. brucei</i> | 103 | 93   | 195  |
| Tbg972.7.8200 | <i>T. brucei</i> | 122 | 618  | 739  |
| Tbg972.7.8200 | <i>T. brucei</i> | 46  | 1273 | 1318 |
| Tbg972.7.8200 | <i>T. brucei</i> | 60  | 1399 | 1458 |
| Tbg972.7.8200 | <i>T. brucei</i> | 40  | 1779 | 1818 |
| Tbg972.7.8210 | <i>T. brucei</i> | 65  | 1    | 65   |
| Tbg972.7.8210 | <i>T. brucei</i> | 45  | 244  | 288  |
| Tbg972.7.8210 | <i>T. brucei</i> | 45  | 244  | 288  |
| Tbg972.7.8220 | <i>T. brucei</i> | 60  | 42   | 101  |
| Tbg972.7.8220 | <i>T. brucei</i> | 48  | 443  | 490  |
| Tbg972.7.8220 | <i>T. brucei</i> | 339 | 533  | 871  |
| Tbg972.7.8220 | <i>T. brucei</i> | 660 | 905  | 1564 |
| Tbg972.7.8230 | <i>T. brucei</i> | 93  | 103  | 195  |
| Tbg972.7.8270 | <i>T. brucei</i> | 110 | 1    | 110  |
| Tbg972.7.8270 | <i>T. brucei</i> | 72  | 162  | 233  |
| Tbg972.7.8270 | <i>T. brucei</i> | 241 | 235  | 475  |
| Tbg972.7.8270 | <i>T. brucei</i> | 145 | 507  | 651  |
| Tbg972.7.8290 | <i>T. brucei</i> | 43  | 83   | 125  |
| Tbg972.7.8290 | <i>T. brucei</i> | 49  | 817  | 865  |
| Tbg972.7.8290 | <i>T. brucei</i> | 49  | 817  | 865  |
| Tbg972.7.830  | <i>T. brucei</i> | 156 | 122  | 277  |
| Tbg972.7.8320 | <i>T. brucei</i> | 57  | 190  | 246  |
| Tbg972.7.8330 | <i>T. brucei</i> | 94  | 40   | 133  |
| Tbg972.7.8330 | <i>T. brucei</i> | 68  | 169  | 236  |
| Tbg972.7.8340 | <i>T. brucei</i> | 42  | 1    | 42   |
| Tbg972.7.8350 | <i>T. brucei</i> | 375 | 94   | 468  |
| Tbg972.7.8350 | <i>T. brucei</i> | 274 | 474  | 747  |
| Tbg972.7.8350 | <i>T. brucei</i> | 172 | 752  | 923  |
| Tbg972.7.8350 | <i>T. brucei</i> | 41  | 932  | 972  |
| Tbg972.7.8350 | <i>T. brucei</i> | 107 | 992  | 1098 |
| Tbg972.7.8350 | <i>T. brucei</i> | 114 | 1126 | 1239 |
| Tbg972.7.8380 | <i>T. brucei</i> | 58  | 27   | 84   |
| Tbg972.7.8380 | <i>T. brucei</i> | 79  | 259  | 337  |



|               |                  |      |      |      |
|---------------|------------------|------|------|------|
| Tbg972.7.8380 | <i>T. brucei</i> | 46   | 365  | 410  |
| Tbg972.7.8380 | <i>T. brucei</i> | 107  | 631  | 737  |
| Tbg972.7.8390 | <i>T. brucei</i> | 64   | 35   | 98   |
| Tbg972.7.8390 | <i>T. brucei</i> | 119  | 303  | 421  |
| Tbg972.7.8400 | <i>T. brucei</i> | 130  | 155  | 284  |
| Tbg972.7.8410 | <i>T. brucei</i> | 48   | 1    | 48   |
| Tbg972.7.8410 | <i>T. brucei</i> | 94   | 207  | 300  |
| Tbg972.7.8410 | <i>T. brucei</i> | 45   | 336  | 380  |
| Tbg972.7.8410 | <i>T. brucei</i> | 155  | 407  | 561  |
| Tbg972.7.8430 | <i>T. brucei</i> | 194  | 1    | 194  |
| Tbg972.7.8430 | <i>T. brucei</i> | 62   | 206  | 267  |
| Tbg972.7.8430 | <i>T. brucei</i> | 252  | 296  | 547  |
| Tbg972.7.8430 | <i>T. brucei</i> | 99   | 639  | 737  |
| Tbg972.7.8430 | <i>T. brucei</i> | 114  | 793  | 906  |
| Tbg972.7.8450 | <i>T. brucei</i> | 199  | 1    | 199  |
| Tbg972.7.8450 | <i>T. brucei</i> | 254  | 473  | 726  |
| Tbg972.7.8460 | <i>T. brucei</i> | 62   | 87   | 148  |
| Tbg972.7.8460 | <i>T. brucei</i> | 52   | 484  | 535  |
| Tbg972.7.8460 | <i>T. brucei</i> | 52   | 484  | 535  |
| Tbg972.7.8470 | <i>T. brucei</i> | 50   | 1    | 50   |
| Tbg972.7.8480 | <i>T. brucei</i> | 1277 | 1    | 1277 |
| Tbg972.7.8490 | <i>T. brucei</i> | 211  | 41   | 251  |
| Tbg972.7.8490 | <i>T. brucei</i> | 196  | 267  | 462  |
| Tbg972.7.8490 | <i>T. brucei</i> | 265  | 466  | 730  |
| Tbg972.7.8490 | <i>T. brucei</i> | 312  | 750  | 1061 |
| Tbg972.7.8490 | <i>T. brucei</i> | 70   | 1113 | 1182 |
| Tbg972.7.8490 | <i>T. brucei</i> | 284  | 1201 | 1484 |
| Tbg972.7.8490 | <i>T. brucei</i> | 330  | 1498 | 1827 |
| Tbg972.7.8490 | <i>T. brucei</i> | 57   | 1873 | 1929 |
| Tbg972.7.8490 | <i>T. brucei</i> | 77   | 1936 | 2012 |
| Tbg972.7.8490 | <i>T. brucei</i> | 64   | 2014 | 2077 |
| Tbg972.7.8490 | <i>T. brucei</i> | 149  | 2100 | 2248 |
| Tbg972.7.8490 | <i>T. brucei</i> | 45   | 2298 | 2342 |
| Tbg972.7.850  | <i>T. brucei</i> | 48   | 477  | 524  |
| Tbg972.7.8500 | <i>T. brucei</i> | 81   | 43   | 123  |
| Tbg972.7.8500 | <i>T. brucei</i> | 46   | 249  | 294  |
| Tbg972.7.8500 | <i>T. brucei</i> | 75   | 390  | 464  |
| Tbg972.7.8510 | <i>T. brucei</i> | 47   | 52   | 98   |
| Tbg972.7.8520 | <i>T. brucei</i> | 811  | 1    | 811  |
| Tbg972.7.8520 | <i>T. brucei</i> | 72   | 841  | 912  |
| Tbg972.7.8530 | <i>T. brucei</i> | 55   | 51   | 105  |
| Tbg972.7.8540 | <i>T. brucei</i> | 45   | 35   | 79   |
| Tbg972.7.8540 | <i>T. brucei</i> | 226  | 335  | 560  |
| Tbg972.7.8540 | <i>T. brucei</i> | 93   | 608  | 700  |
| Tbg972.7.8550 | <i>T. brucei</i> | 42   | 152  | 193  |
| Tbg972.7.8550 | <i>T. brucei</i> | 62   | 478  | 539  |
| Tbg972.7.8550 | <i>T. brucei</i> | 59   | 690  | 748  |

|               |                  |     |      |      |
|---------------|------------------|-----|------|------|
| Tbg972.7.8550 | <i>T. brucei</i> | 156 | 878  | 1033 |
| Tbg972.7.8550 | <i>T. brucei</i> | 56  | 1262 | 1317 |
| Tbg972.7.8560 | <i>T. brucei</i> | 92  | 519  | 610  |
| Tbg972.7.8560 | <i>T. brucei</i> | 64  | 642  | 705  |
| Tbg972.7.8560 | <i>T. brucei</i> | 41  | 715  | 755  |
| Tbg972.7.8560 | <i>T. brucei</i> | 252 | 790  | 1041 |
| Tbg972.7.8570 | <i>T. brucei</i> | 176 | 1    | 176  |
| Tbg972.7.8570 | <i>T. brucei</i> | 201 | 192  | 392  |
| Tbg972.7.8570 | <i>T. brucei</i> | 77  | 424  | 500  |
| Tbg972.7.8570 | <i>T. brucei</i> | 239 | 552  | 790  |
| Tbg972.7.8580 | <i>T. brucei</i> | 67  | 1    | 67   |
| Tbg972.7.8580 | <i>T. brucei</i> | 46  | 169  | 214  |
| Tbg972.7.8580 | <i>T. brucei</i> | 44  | 251  | 294  |
| Tbg972.7.8580 | <i>T. brucei</i> | 65  | 405  | 469  |
| Tbg972.7.8590 | <i>T. brucei</i> | 158 | 136  | 293  |
| Tbg972.7.8590 | <i>T. brucei</i> | 58  | 433  | 490  |
| Tbg972.7.8590 | <i>T. brucei</i> | 85  | 584  | 668  |
| Tbg972.7.860  | <i>T. brucei</i> | 61  | 30   | 90   |
| Tbg972.7.860  | <i>T. brucei</i> | 71  | 643  | 713  |
| Tbg972.7.860  | <i>T. brucei</i> | 71  | 643  | 713  |
| Tbg972.7.8600 | <i>T. brucei</i> | 135 | 71   | 205  |
| Tbg972.7.8600 | <i>T. brucei</i> | 49  | 580  | 628  |
| Tbg972.7.8600 | <i>T. brucei</i> | 50  | 682  | 731  |
| Tbg972.7.8600 | <i>T. brucei</i> | 129 | 823  | 951  |
| Tbg972.7.8620 | <i>T. brucei</i> | 201 | 176  | 376  |
| Tbg972.7.8650 | <i>T. brucei</i> | 168 | 1    | 168  |
| Tbg972.7.8650 | <i>T. brucei</i> | 63  | 291  | 353  |
| Tbg972.7.8650 | <i>T. brucei</i> | 127 | 516  | 642  |
| Tbg972.7.8660 | <i>T. brucei</i> | 48  | 57   | 104  |
| Tbg972.7.8660 | <i>T. brucei</i> | 59  | 188  | 246  |
| Tbg972.7.8660 | <i>T. brucei</i> | 59  | 188  | 246  |
| Tbg972.7.8670 | <i>T. brucei</i> | 77  | 65   | 141  |
| Tbg972.7.8670 | <i>T. brucei</i> | 230 | 166  | 395  |
| Tbg972.7.8675 | <i>T. brucei</i> | 44  | 1    | 44   |
| Tbg972.7.8680 | <i>T. brucei</i> | 52  | 1    | 52   |
| Tbg972.7.870  | <i>T. brucei</i> | 67  | 72   | 138  |
| Tbg972.7.870  | <i>T. brucei</i> | 112 | 2663 | 2774 |
| Tbg972.7.870  | <i>T. brucei</i> | 61  | 2903 | 2963 |
| Tbg972.7.8700 | <i>T. brucei</i> | 131 | 35   | 165  |
| Tbg972.7.8700 | <i>T. brucei</i> | 502 | 212  | 713  |
| Tbg972.7.8700 | <i>T. brucei</i> | 159 | 716  | 874  |
| Tbg972.7.8700 | <i>T. brucei</i> | 336 | 880  | 1215 |
| Tbg972.7.8700 | <i>T. brucei</i> | 64  | 1218 | 1281 |
| Tbg972.7.8700 | <i>T. brucei</i> | 158 | 1285 | 1442 |
| Tbg972.7.8700 | <i>T. brucei</i> | 161 | 1450 | 1610 |
| Tbg972.7.8700 | <i>T. brucei</i> | 192 | 1643 | 1834 |
| Tbg972.7.8700 | <i>T. brucei</i> | 102 | 1837 | 1938 |

|               |                  |     |      |      |
|---------------|------------------|-----|------|------|
| Tbg972.7.8700 | <i>T. brucei</i> | 47  | 1946 | 1992 |
| Tbg972.7.8700 | <i>T. brucei</i> | 72  | 2115 | 2186 |
| Tbg972.7.8700 | <i>T. brucei</i> | 53  | 2354 | 2406 |
| Tbg972.7.8720 | <i>T. brucei</i> | 46  | 1    | 46   |
| Tbg972.7.8735 | <i>T. brucei</i> | 51  | 1    | 51   |
| Tbg972.7.8740 | <i>T. brucei</i> | 51  | 1    | 51   |
| Tbg972.7.8740 | <i>T. brucei</i> | 85  | 117  | 201  |
| Tbg972.7.8740 | <i>T. brucei</i> | 94  | 508  | 601  |
| Tbg972.7.880  | <i>T. brucei</i> | 112 | 331  | 442  |
| Tbg972.7.8800 | <i>T. brucei</i> | 44  | 50   | 93   |
| Tbg972.7.8810 | <i>T. brucei</i> | 70  | 217  | 286  |
| Tbg972.7.8812 | <i>T. brucei</i> | 41  | 1    | 41   |
| Tbg972.7.8830 | <i>T. brucei</i> | 62  | 74   | 135  |
| Tbg972.7.8835 | <i>T. brucei</i> | 73  | 20   | 92   |
| Tbg972.7.890  | <i>T. brucei</i> | 108 | 131  | 238  |
| Tbg972.7.890  | <i>T. brucei</i> | 61  | 303  | 363  |
| Tbg972.7.890  | <i>T. brucei</i> | 61  | 303  | 363  |
| Tbg972.7.910  | <i>T. brucei</i> | 68  | 29   | 96   |
| Tbg972.7.910  | <i>T. brucei</i> | 299 | 100  | 398  |
| Tbg972.7.920  | <i>T. brucei</i> | 135 | 408  | 542  |
| Tbg972.7.940  | <i>T. brucei</i> | 93  | 55   | 147  |
| Tbg972.7.940  | <i>T. brucei</i> | 107 | 561  | 667  |
| Tbg972.7.950  | <i>T. brucei</i> | 70  | 291  | 360  |
| Tbg972.7.950  | <i>T. brucei</i> | 50  | 644  | 693  |
| Tbg972.7.970  | <i>T. brucei</i> | 43  | 1    | 43   |
| Tbg972.8.100  | <i>T. brucei</i> | 80  | 53   | 132  |
| Tbg972.8.1000 | <i>T. brucei</i> | 68  | 13   | 80   |
| Tbg972.8.1010 | <i>T. brucei</i> | 40  | 1    | 40   |
| Tbg972.8.1020 | <i>T. brucei</i> | 45  | 1    | 45   |
| Tbg972.8.1040 | <i>T. brucei</i> | 96  | 190  | 285  |
| Tbg972.8.1040 | <i>T. brucei</i> | 45  | 653  | 697  |
| Tbg972.8.1040 | <i>T. brucei</i> | 49  | 1496 | 1544 |
| Tbg972.8.1040 | <i>T. brucei</i> | 55  | 1727 | 1781 |
| Tbg972.8.1040 | <i>T. brucei</i> | 86  | 2049 | 2134 |
| Tbg972.8.1060 | <i>T. brucei</i> | 331 | 172  | 502  |
| Tbg972.8.1070 | <i>T. brucei</i> | 127 | 443  | 569  |
| Tbg972.8.110  | <i>T. brucei</i> | 95  | 90   | 184  |
| Tbg972.8.110  | <i>T. brucei</i> | 43  | 2055 | 2097 |
| Tbg972.8.110  | <i>T. brucei</i> | 43  | 2055 | 2097 |
| Tbg972.8.1100 | <i>T. brucei</i> | 64  | 71   | 134  |
| Tbg972.8.1110 | <i>T. brucei</i> | 83  | 33   | 115  |
| Tbg972.8.1120 | <i>T. brucei</i> | 238 | 483  | 720  |
| Tbg972.8.1130 | <i>T. brucei</i> | 98  | 1    | 98   |
| Tbg972.8.1130 | <i>T. brucei</i> | 62  | 620  | 681  |
| Tbg972.8.1170 | <i>T. brucei</i> | 106 | 83   | 188  |
| Tbg972.8.1180 | <i>T. brucei</i> | 58  | 45   | 102  |
| Tbg972.8.1210 | <i>T. brucei</i> | 70  | 240  | 309  |

|               |                  |     |      |      |
|---------------|------------------|-----|------|------|
| Tbg972.8.1210 | <i>T. brucei</i> | 125 | 1063 | 1187 |
| Tbg972.8.1210 | <i>T. brucei</i> | 41  | 1215 | 1255 |
| Tbg972.8.1210 | <i>T. brucei</i> | 51  | 1316 | 1366 |
| Tbg972.8.1210 | <i>T. brucei</i> | 101 | 1447 | 1547 |
| Tbg972.8.1210 | <i>T. brucei</i> | 132 | 1745 | 1876 |
| Tbg972.8.1210 | <i>T. brucei</i> | 386 | 2366 | 2751 |
| Tbg972.8.1210 | <i>T. brucei</i> | 186 | 2805 | 2990 |
| Tbg972.8.1210 | <i>T. brucei</i> | 61  | 3103 | 3163 |
| Tbg972.8.1210 | <i>T. brucei</i> | 52  | 3200 | 3251 |
| Tbg972.8.1210 | <i>T. brucei</i> | 42  | 3360 | 3401 |
| Tbg972.8.1210 | <i>T. brucei</i> | 91  | 3800 | 3890 |
| Tbg972.8.1220 | <i>T. brucei</i> | 64  | 1    | 64   |
| Tbg972.8.1250 | <i>T. brucei</i> | 52  | 1    | 52   |
| Tbg972.8.1250 | <i>T. brucei</i> | 53  | 96   | 148  |
| Tbg972.8.1250 | <i>T. brucei</i> | 53  | 96   | 148  |
| Tbg972.8.1280 | <i>T. brucei</i> | 129 | 242  | 370  |
| Tbg972.8.1280 | <i>T. brucei</i> | 187 | 390  | 576  |
| Tbg972.8.1290 | <i>T. brucei</i> | 169 | 1    | 169  |
| Tbg972.8.1300 | <i>T. brucei</i> | 54  | 172  | 225  |
| Tbg972.8.1300 | <i>T. brucei</i> | 99  | 365  | 463  |
| Tbg972.8.1300 | <i>T. brucei</i> | 107 | 476  | 582  |
| Tbg972.8.1310 | <i>T. brucei</i> | 76  | 116  | 191  |
| Tbg972.8.1310 | <i>T. brucei</i> | 54  | 411  | 464  |
| Tbg972.8.1310 | <i>T. brucei</i> | 54  | 411  | 464  |
| Tbg972.8.1350 | <i>T. brucei</i> | 53  | 1    | 53   |
| Tbg972.8.1360 | <i>T. brucei</i> | 77  | 38   | 114  |
| Tbg972.8.1370 | <i>T. brucei</i> | 93  | 1    | 93   |
| Tbg972.8.1390 | <i>T. brucei</i> | 74  | 50   | 123  |
| Tbg972.8.1390 | <i>T. brucei</i> | 40  | 239  | 278  |
| Tbg972.8.140  | <i>T. brucei</i> | 66  | 1    | 66   |
| Tbg972.8.1410 | <i>T. brucei</i> | 91  | 25   | 115  |
| Tbg972.8.1410 | <i>T. brucei</i> | 120 | 177  | 296  |
| Tbg972.8.1410 | <i>T. brucei</i> | 79  | 418  | 496  |
| Tbg972.8.1410 | <i>T. brucei</i> | 107 | 563  | 669  |
| Tbg972.8.1440 | <i>T. brucei</i> | 80  | 233  | 312  |
| Tbg972.8.1470 | <i>T. brucei</i> | 99  | 52   | 150  |
| Tbg972.8.1470 | <i>T. brucei</i> | 40  | 614  | 653  |
| Tbg972.8.1470 | <i>T. brucei</i> | 96  | 912  | 1007 |
| Tbg972.8.1470 | <i>T. brucei</i> | 43  | 1110 | 1152 |
| Tbg972.8.1470 | <i>T. brucei</i> | 44  | 1753 | 1796 |
| Tbg972.8.1490 | <i>T. brucei</i> | 41  | 285  | 325  |
| Tbg972.8.1490 | <i>T. brucei</i> | 91  | 489  | 579  |
| Tbg972.8.1490 | <i>T. brucei</i> | 91  | 489  | 579  |
| Tbg972.8.150  | <i>T. brucei</i> | 157 | 175  | 331  |
| Tbg972.8.1500 | <i>T. brucei</i> | 53  | 192  | 244  |
| Tbg972.8.1510 | <i>T. brucei</i> | 48  | 143  | 190  |
| Tbg972.8.1520 | <i>T. brucei</i> | 47  | 120  | 166  |

|               |                  |     |      |      |
|---------------|------------------|-----|------|------|
| Tbg972.8.1540 | <i>T. brucei</i> | 102 | 205  | 306  |
| Tbg972.8.1540 | <i>T. brucei</i> | 84  | 311  | 394  |
| Tbg972.8.1560 | <i>T. brucei</i> | 67  | 1    | 67   |
| Tbg972.8.1570 | <i>T. brucei</i> | 89  | 153  | 241  |
| Tbg972.8.1590 | <i>T. brucei</i> | 73  | 34   | 106  |
| Tbg972.8.1640 | <i>T. brucei</i> | 48  | 297  | 344  |
| Tbg972.8.1650 | <i>T. brucei</i> | 74  | 228  | 301  |
| Tbg972.8.1655 | <i>T. brucei</i> | 107 | 24   | 130  |
| Tbg972.8.1670 | <i>T. brucei</i> | 118 | 1    | 118  |
| Tbg972.8.1670 | <i>T. brucei</i> | 77  | 180  | 256  |
| Tbg972.8.1670 | <i>T. brucei</i> | 58  | 305  | 362  |
| Tbg972.8.1680 | <i>T. brucei</i> | 74  | 178  | 251  |
| Tbg972.8.170  | <i>T. brucei</i> | 44  | 482  | 525  |
| Tbg972.8.1700 | <i>T. brucei</i> | 52  | 247  | 298  |
| Tbg972.8.1705 | <i>T. brucei</i> | 60  | 1    | 60   |
| Tbg972.8.1730 | <i>T. brucei</i> | 83  | 1    | 83   |
| Tbg972.8.1740 | <i>T. brucei</i> | 114 | 1    | 114  |
| Tbg972.8.1760 | <i>T. brucei</i> | 104 | 131  | 234  |
| Tbg972.8.1770 | <i>T. brucei</i> | 73  | 34   | 106  |
| Tbg972.8.1780 | <i>T. brucei</i> | 48  | 1    | 48   |
| Tbg972.8.1790 | <i>T. brucei</i> | 52  | 1    | 52   |
| Tbg972.8.1790 | <i>T. brucei</i> | 68  | 292  | 359  |
| Tbg972.8.1810 | <i>T. brucei</i> | 60  | 554  | 613  |
| Tbg972.8.1810 | <i>T. brucei</i> | 42  | 1266 | 1307 |
| Tbg972.8.1830 | <i>T. brucei</i> | 47  | 74   | 120  |
| Tbg972.8.1830 | <i>T. brucei</i> | 114 | 437  | 550  |
| Tbg972.8.1830 | <i>T. brucei</i> | 114 | 437  | 550  |
| Tbg972.8.1840 | <i>T. brucei</i> | 147 | 47   | 193  |
| Tbg972.8.1840 | <i>T. brucei</i> | 86  | 235  | 320  |
| Tbg972.8.1840 | <i>T. brucei</i> | 75  | 480  | 554  |
| Tbg972.8.1840 | <i>T. brucei</i> | 66  | 595  | 660  |
| Tbg972.8.1840 | <i>T. brucei</i> | 42  | 777  | 818  |
| Tbg972.8.1840 | <i>T. brucei</i> | 46  | 1043 | 1088 |
| Tbg972.8.1840 | <i>T. brucei</i> | 52  | 1238 | 1289 |
| Tbg972.8.1840 | <i>T. brucei</i> | 59  | 1407 | 1465 |
| Tbg972.8.1870 | <i>T. brucei</i> | 147 | 1    | 147  |
| Tbg972.8.1870 | <i>T. brucei</i> | 56  | 190  | 245  |
| Tbg972.8.1880 | <i>T. brucei</i> | 81  | 1    | 81   |
| Tbg972.8.1880 | <i>T. brucei</i> | 401 | 149  | 549  |
| Tbg972.8.1880 | <i>T. brucei</i> | 161 | 572  | 732  |
| Tbg972.8.1880 | <i>T. brucei</i> | 66  | 753  | 818  |
| Tbg972.8.1880 | <i>T. brucei</i> | 123 | 862  | 984  |
| Tbg972.8.1880 | <i>T. brucei</i> | 83  | 1097 | 1179 |
| Tbg972.8.1890 | <i>T. brucei</i> | 147 | 11   | 157  |
| Tbg972.8.190  | <i>T. brucei</i> | 85  | 1    | 85   |
| Tbg972.8.190  | <i>T. brucei</i> | 123 | 181  | 303  |
| Tbg972.8.1900 | <i>T. brucei</i> | 85  | 1    | 85   |

|               |                  |     |      |      |
|---------------|------------------|-----|------|------|
| Tbg972.8.1950 | <i>T. brucei</i> | 56  | 200  | 255  |
| Tbg972.8.20   | <i>T. brucei</i> | 152 | 115  | 266  |
| Tbg972.8.20   | <i>T. brucei</i> | 162 | 274  | 435  |
| Tbg972.8.2030 | <i>T. brucei</i> | 236 | 1    | 236  |
| Tbg972.8.2060 | <i>T. brucei</i> | 72  | 37   | 108  |
| Tbg972.8.2060 | <i>T. brucei</i> | 50  | 384  | 433  |
| Tbg972.8.2070 | <i>T. brucei</i> | 80  | 1    | 80   |
| Tbg972.8.2070 | <i>T. brucei</i> | 88  | 103  | 190  |
| Tbg972.8.2070 | <i>T. brucei</i> | 50  | 312  | 361  |
| Tbg972.8.2070 | <i>T. brucei</i> | 85  | 902  | 986  |
| Tbg972.8.2080 | <i>T. brucei</i> | 523 | 1    | 523  |
| Tbg972.8.2090 | <i>T. brucei</i> | 112 | 1    | 112  |
| Tbg972.8.2090 | <i>T. brucei</i> | 174 | 473  | 646  |
| Tbg972.8.210  | <i>T. brucei</i> | 136 | 365  | 500  |
| Tbg972.8.2100 | <i>T. brucei</i> | 41  | 401  | 441  |
| Tbg972.8.2110 | <i>T. brucei</i> | 56  | 1    | 56   |
| Tbg972.8.2110 | <i>T. brucei</i> | 42  | 123  | 164  |
| Tbg972.8.2110 | <i>T. brucei</i> | 55  | 206  | 260  |
| Tbg972.8.2110 | <i>T. brucei</i> | 100 | 324  | 423  |
| Tbg972.8.2110 | <i>T. brucei</i> | 66  | 694  | 759  |
| Tbg972.8.2120 | <i>T. brucei</i> | 89  | 1    | 89   |
| Tbg972.8.2120 | <i>T. brucei</i> | 244 | 507  | 750  |
| Tbg972.8.2150 | <i>T. brucei</i> | 40  | 1    | 40   |
| Tbg972.8.2170 | <i>T. brucei</i> | 53  | 51   | 103  |
| Tbg972.8.2170 | <i>T. brucei</i> | 129 | 128  | 256  |
| Tbg972.8.2170 | <i>T. brucei</i> | 89  | 346  | 434  |
| Tbg972.8.2170 | <i>T. brucei</i> | 47  | 1289 | 1335 |
| Tbg972.8.2170 | <i>T. brucei</i> | 44  | 1443 | 1486 |
| Tbg972.8.2170 | <i>T. brucei</i> | 198 | 1717 | 1914 |
| Tbg972.8.2190 | <i>T. brucei</i> | 44  | 1    | 44   |
| Tbg972.8.220  | <i>T. brucei</i> | 106 | 71   | 176  |
| Tbg972.8.220  | <i>T. brucei</i> | 57  | 199  | 255  |
| Tbg972.8.2200 | <i>T. brucei</i> | 69  | 585  | 653  |
| Tbg972.8.2250 | <i>T. brucei</i> | 124 | 23   | 146  |
| Tbg972.8.2260 | <i>T. brucei</i> | 75  | 144  | 218  |
| Tbg972.8.2260 | <i>T. brucei</i> | 71  | 353  | 423  |
| Tbg972.8.2260 | <i>T. brucei</i> | 71  | 353  | 423  |
| Tbg972.8.2270 | <i>T. brucei</i> | 47  | 314  | 360  |
| Tbg972.8.2280 | <i>T. brucei</i> | 84  | 15   | 98   |
| Tbg972.8.2280 | <i>T. brucei</i> | 52  | 158  | 209  |
| Tbg972.8.2310 | <i>T. brucei</i> | 40  | 312  | 351  |
| Tbg972.8.2330 | <i>T. brucei</i> | 52  | 336  | 387  |
| Tbg972.8.2330 | <i>T. brucei</i> | 42  | 601  | 642  |
| Tbg972.8.2330 | <i>T. brucei</i> | 66  | 1373 | 1438 |
| Tbg972.8.2330 | <i>T. brucei</i> | 52  | 1888 | 1939 |
| Tbg972.8.2330 | <i>T. brucei</i> | 40  | 2323 | 2362 |
| Tbg972.8.2330 | <i>T. brucei</i> | 132 | 2968 | 3099 |

|               |                  |      |     |      |
|---------------|------------------|------|-----|------|
| Tbg972.8.2340 | <i>T. brucei</i> | 47   | 1   | 47   |
| Tbg972.8.2360 | <i>T. brucei</i> | 40   | 1   | 40   |
| Tbg972.8.2360 | <i>T. brucei</i> | 133  | 123 | 255  |
| Tbg972.8.2360 | <i>T. brucei</i> | 133  | 123 | 255  |
| Tbg972.8.2380 | <i>T. brucei</i> | 71   | 74  | 144  |
| Tbg972.8.2380 | <i>T. brucei</i> | 62   | 179 | 240  |
| Tbg972.8.2390 | <i>T. brucei</i> | 97   | 703 | 799  |
| Tbg972.8.2390 | <i>T. brucei</i> | 95   | 866 | 960  |
| Tbg972.8.240  | <i>T. brucei</i> | 58   | 1   | 58   |
| Tbg972.8.2400 | <i>T. brucei</i> | 81   | 276 | 356  |
| Tbg972.8.2400 | <i>T. brucei</i> | 1012 | 411 | 1422 |
| Tbg972.8.2410 | <i>T. brucei</i> | 40   | 117 | 156  |
| Tbg972.8.2420 | <i>T. brucei</i> | 40   | 119 | 158  |
| Tbg972.8.2430 | <i>T. brucei</i> | 40   | 352 | 391  |
| Tbg972.8.2440 | <i>T. brucei</i> | 96   | 150 | 245  |
| Tbg972.8.2450 | <i>T. brucei</i> | 42   | 1   | 42   |
| Tbg972.8.2460 | <i>T. brucei</i> | 64   | 1   | 64   |
| Tbg972.8.2470 | <i>T. brucei</i> | 60   | 1   | 60   |
| Tbg972.8.2480 | <i>T. brucei</i> | 54   | 16  | 69   |
| Tbg972.8.2480 | <i>T. brucei</i> | 43   | 132 | 174  |
| Tbg972.8.2480 | <i>T. brucei</i> | 43   | 132 | 174  |
| Tbg972.8.250  | <i>T. brucei</i> | 41   | 563 | 603  |
| Tbg972.8.250  | <i>T. brucei</i> | 126  | 882 | 1007 |
| Tbg972.8.2500 | <i>T. brucei</i> | 144  | 20  | 163  |
| Tbg972.8.2500 | <i>T. brucei</i> | 55   | 197 | 251  |
| Tbg972.8.2500 | <i>T. brucei</i> | 206  | 307 | 512  |
| Tbg972.8.2500 | <i>T. brucei</i> | 58   | 574 | 631  |
| Tbg972.8.2500 | <i>T. brucei</i> | 52   | 678 | 729  |
| Tbg972.8.2500 | <i>T. brucei</i> | 71   | 734 | 804  |
| Tbg972.8.2500 | <i>T. brucei</i> | 90   | 809 | 898  |
| Tbg972.8.2510 | <i>T. brucei</i> | 63   | 124 | 186  |
| Tbg972.8.2510 | <i>T. brucei</i> | 198  | 223 | 420  |
| Tbg972.8.2510 | <i>T. brucei</i> | 48   | 450 | 497  |
| Tbg972.8.2510 | <i>T. brucei</i> | 150  | 528 | 677  |
| Tbg972.8.2510 | <i>T. brucei</i> | 81   | 685 | 765  |
| Tbg972.8.2520 | <i>T. brucei</i> | 69   | 520 | 588  |
| Tbg972.8.2530 | <i>T. brucei</i> | 64   | 1   | 64   |
| Tbg972.8.2540 | <i>T. brucei</i> | 107  | 194 | 300  |
| Tbg972.8.2570 | <i>T. brucei</i> | 54   | 234 | 287  |
| Tbg972.8.2580 | <i>T. brucei</i> | 56   | 230 | 285  |
| Tbg972.8.260  | <i>T. brucei</i> | 124  | 1   | 124  |
| Tbg972.8.2630 | <i>T. brucei</i> | 41   | 43  | 83   |
| Tbg972.8.2640 | <i>T. brucei</i> | 44   | 1   | 44   |
| Tbg972.8.2650 | <i>T. brucei</i> | 40   | 265 | 304  |
| Tbg972.8.2660 | <i>T. brucei</i> | 41   | 162 | 202  |
| Tbg972.8.2660 | <i>T. brucei</i> | 53   | 356 | 408  |
| Tbg972.8.2680 | <i>T. brucei</i> | 140  | 371 | 510  |

|               |                  |     |      |      |
|---------------|------------------|-----|------|------|
| Tbg972.8.2690 | <i>T. brucei</i> | 264 | 107  | 370  |
| Tbg972.8.2690 | <i>T. brucei</i> | 319 | 419  | 737  |
| Tbg972.8.2700 | <i>T. brucei</i> | 40  | 267  | 306  |
| Tbg972.8.2700 | <i>T. brucei</i> | 58  | 323  | 380  |
| Tbg972.8.2700 | <i>T. brucei</i> | 78  | 600  | 677  |
| Tbg972.8.2770 | <i>T. brucei</i> | 58  | 23   | 80   |
| Tbg972.8.2770 | <i>T. brucei</i> | 120 | 552  | 671  |
| Tbg972.8.2790 | <i>T. brucei</i> | 93  | 154  | 246  |
| Tbg972.8.2790 | <i>T. brucei</i> | 98  | 402  | 499  |
| Tbg972.8.2790 | <i>T. brucei</i> | 48  | 798  | 845  |
| Tbg972.8.2790 | <i>T. brucei</i> | 67  | 1206 | 1272 |
| Tbg972.8.2810 | <i>T. brucei</i> | 41  | 1    | 41   |
| Tbg972.8.2810 | <i>T. brucei</i> | 113 | 411  | 523  |
| Tbg972.8.2840 | <i>T. brucei</i> | 45  | 17   | 61   |
| Tbg972.8.2860 | <i>T. brucei</i> | 52  | 59   | 110  |
| Tbg972.8.2890 | <i>T. brucei</i> | 60  | 1    | 60   |
| Tbg972.8.2910 | <i>T. brucei</i> | 84  | 1    | 84   |
| Tbg972.8.2920 | <i>T. brucei</i> | 150 | 134  | 283  |
| Tbg972.8.2920 | <i>T. brucei</i> | 41  | 411  | 451  |
| Tbg972.8.2920 | <i>T. brucei</i> | 116 | 542  | 657  |
| Tbg972.8.2920 | <i>T. brucei</i> | 102 | 685  | 786  |
| Tbg972.8.2930 | <i>T. brucei</i> | 128 | 1    | 128  |
| Tbg972.8.2930 | <i>T. brucei</i> | 90  | 183  | 272  |
| Tbg972.8.2930 | <i>T. brucei</i> | 56  | 274  | 329  |
| Tbg972.8.2930 | <i>T. brucei</i> | 70  | 538  | 607  |
| Tbg972.8.2930 | <i>T. brucei</i> | 102 | 812  | 913  |
| Tbg972.8.2940 | <i>T. brucei</i> | 314 | 1    | 314  |
| Tbg972.8.2950 | <i>T. brucei</i> | 72  | 1057 | 1128 |
| Tbg972.8.2950 | <i>T. brucei</i> | 62  | 1251 | 1312 |
| Tbg972.8.2950 | <i>T. brucei</i> | 62  | 1251 | 1312 |
| Tbg972.8.2955 | <i>T. brucei</i> | 65  | 19   | 83   |
| Tbg972.8.2955 | <i>T. brucei</i> | 45  | 128  | 172  |
| Tbg972.8.2960 | <i>T. brucei</i> | 42  | 105  | 146  |
| Tbg972.8.2960 | <i>T. brucei</i> | 50  | 390  | 439  |
| Tbg972.8.2960 | <i>T. brucei</i> | 153 | 458  | 610  |
| Tbg972.8.2960 | <i>T. brucei</i> | 155 | 642  | 796  |
| Tbg972.8.2970 | <i>T. brucei</i> | 44  | 426  | 469  |
| Tbg972.8.2990 | <i>T. brucei</i> | 53  | 1290 | 1342 |
| Tbg972.8.2990 | <i>T. brucei</i> | 116 | 3197 | 3312 |
| Tbg972.8.2990 | <i>T. brucei</i> | 60  | 3419 | 3478 |
| Tbg972.8.2990 | <i>T. brucei</i> | 55  | 3723 | 3777 |
| Tbg972.8.300  | <i>T. brucei</i> | 44  | 41   | 84   |
| Tbg972.8.3040 | <i>T. brucei</i> | 58  | 1    | 58   |
| Tbg972.8.3050 | <i>T. brucei</i> | 172 | 325  | 496  |
| Tbg972.8.3050 | <i>T. brucei</i> | 137 | 659  | 795  |
| Tbg972.8.3050 | <i>T. brucei</i> | 59  | 851  | 909  |
| Tbg972.8.3050 | <i>T. brucei</i> | 94  | 1037 | 1130 |



|               |                  |     |      |      |
|---------------|------------------|-----|------|------|
| Tbg972.8.3050 | <i>T. brucei</i> | 48  | 1764 | 1811 |
| Tbg972.8.3060 | <i>T. brucei</i> | 115 | 1    | 115  |
| Tbg972.8.3070 | <i>T. brucei</i> | 92  | 1    | 92   |
| Tbg972.8.3080 | <i>T. brucei</i> | 66  | 1    | 66   |
| Tbg972.8.3080 | <i>T. brucei</i> | 159 | 244  | 402  |
| Tbg972.8.3080 | <i>T. brucei</i> | 159 | 244  | 402  |
| Tbg972.8.310  | <i>T. brucei</i> | 211 | 1    | 211  |
| Tbg972.8.3100 | <i>T. brucei</i> | 41  | 313  | 353  |
| Tbg972.8.3110 | <i>T. brucei</i> | 89  | 1    | 89   |
| Tbg972.8.3110 | <i>T. brucei</i> | 82  | 103  | 184  |
| Tbg972.8.3110 | <i>T. brucei</i> | 58  | 733  | 790  |
| Tbg972.8.3160 | <i>T. brucei</i> | 175 | 86   | 260  |
| Tbg972.8.3190 | <i>T. brucei</i> | 183 | 1    | 183  |
| Tbg972.8.3190 | <i>T. brucei</i> | 74  | 222  | 295  |
| Tbg972.8.3190 | <i>T. brucei</i> | 74  | 222  | 295  |
| Tbg972.8.320  | <i>T. brucei</i> | 85  | 1    | 85   |
| Tbg972.8.320  | <i>T. brucei</i> | 82  | 132  | 213  |
| Tbg972.8.320  | <i>T. brucei</i> | 59  | 304  | 362  |
| Tbg972.8.320  | <i>T. brucei</i> | 158 | 886  | 1043 |
| Tbg972.8.320  | <i>T. brucei</i> | 96  | 1225 | 1320 |
| Tbg972.8.3230 | <i>T. brucei</i> | 48  | 1325 | 1372 |
| Tbg972.8.3230 | <i>T. brucei</i> | 49  | 2190 | 2238 |
| Tbg972.8.3230 | <i>T. brucei</i> | 45  | 2407 | 2451 |
| Tbg972.8.3230 | <i>T. brucei</i> | 40  | 3483 | 3522 |
| Tbg972.8.3230 | <i>T. brucei</i> | 47  | 4593 | 4639 |
| Tbg972.8.3230 | <i>T. brucei</i> | 100 | 5545 | 5644 |
| Tbg972.8.3230 | <i>T. brucei</i> | 55  | 5766 | 5820 |
| Tbg972.8.3230 | <i>T. brucei</i> | 243 | 6061 | 6303 |
| Tbg972.8.3250 | <i>T. brucei</i> | 230 | 20   | 249  |
| Tbg972.8.3250 | <i>T. brucei</i> | 61  | 463  | 523  |
| Tbg972.8.3250 | <i>T. brucei</i> | 71  | 539  | 609  |
| Tbg972.8.3280 | <i>T. brucei</i> | 135 | 47   | 181  |
| Tbg972.8.330  | <i>T. brucei</i> | 40  | 1    | 40   |
| Tbg972.8.3310 | <i>T. brucei</i> | 135 | 1    | 135  |
| Tbg972.8.3310 | <i>T. brucei</i> | 66  | 187  | 252  |
| Tbg972.8.3310 | <i>T. brucei</i> | 119 | 284  | 402  |
| Tbg972.8.3310 | <i>T. brucei</i> | 57  | 446  | 502  |
| Tbg972.8.3320 | <i>T. brucei</i> | 40  | 1    | 40   |
| Tbg972.8.3330 | <i>T. brucei</i> | 40  | 26   | 65   |
| Tbg972.8.3330 | <i>T. brucei</i> | 56  | 147  | 202  |
| Tbg972.8.3340 | <i>T. brucei</i> | 41  | 1    | 41   |
| Tbg972.8.3350 | <i>T. brucei</i> | 41  | 1    | 41   |
| Tbg972.8.3370 | <i>T. brucei</i> | 41  | 1    | 41   |
| Tbg972.8.3380 | <i>T. brucei</i> | 126 | 32   | 157  |
| Tbg972.8.3390 | <i>T. brucei</i> | 181 | 29   | 209  |
| Tbg972.8.3390 | <i>T. brucei</i> | 149 | 231  | 379  |
| Tbg972.8.3390 | <i>T. brucei</i> | 101 | 390  | 490  |

|               |                  |     |      |      |
|---------------|------------------|-----|------|------|
| Tbg972.8.340  | <i>T. brucei</i> | 156 | 96   | 251  |
| Tbg972.8.3410 | <i>T. brucei</i> | 79  | 58   | 136  |
| Tbg972.8.3430 | <i>T. brucei</i> | 88  | 70   | 157  |
| Tbg972.8.3430 | <i>T. brucei</i> | 352 | 281  | 632  |
| Tbg972.8.3430 | <i>T. brucei</i> | 308 | 638  | 945  |
| Tbg972.8.3430 | <i>T. brucei</i> | 67  | 975  | 1041 |
| Tbg972.8.3430 | <i>T. brucei</i> | 145 | 1080 | 1224 |
| Tbg972.8.3430 | <i>T. brucei</i> | 58  | 1277 | 1334 |
| Tbg972.8.3430 | <i>T. brucei</i> | 97  | 1349 | 1445 |
| Tbg972.8.3440 | <i>T. brucei</i> | 65  | 1    | 65   |
| Tbg972.8.3440 | <i>T. brucei</i> | 109 | 88   | 196  |
| Tbg972.8.3450 | <i>T. brucei</i> | 113 | 232  | 344  |
| Tbg972.8.3460 | <i>T. brucei</i> | 50  | 269  | 318  |
| Tbg972.8.3470 | <i>T. brucei</i> | 64  | 420  | 483  |
| Tbg972.8.3510 | <i>T. brucei</i> | 97  | 45   | 141  |
| Tbg972.8.3520 | <i>T. brucei</i> | 136 | 1    | 136  |
| Tbg972.8.3520 | <i>T. brucei</i> | 197 | 141  | 337  |
| Tbg972.8.3520 | <i>T. brucei</i> | 44  | 347  | 390  |
| Tbg972.8.3530 | <i>T. brucei</i> | 260 | 1    | 260  |
| Tbg972.8.3550 | <i>T. brucei</i> | 230 | 30   | 259  |
| Tbg972.8.3560 | <i>T. brucei</i> | 77  | 282  | 358  |
| Tbg972.8.3560 | <i>T. brucei</i> | 219 | 414  | 632  |
| Tbg972.8.3560 | <i>T. brucei</i> | 73  | 669  | 741  |
| Tbg972.8.3570 | <i>T. brucei</i> | 98  | 74   | 171  |
| Tbg972.8.3570 | <i>T. brucei</i> | 48  | 238  | 285  |
| Tbg972.8.3570 | <i>T. brucei</i> | 48  | 238  | 285  |
| Tbg972.8.3590 | <i>T. brucei</i> | 964 | 23   | 986  |
| Tbg972.8.360  | <i>T. brucei</i> | 199 | 100  | 298  |
| Tbg972.8.360  | <i>T. brucei</i> | 53  | 314  | 366  |
| Tbg972.8.3650 | <i>T. brucei</i> | 40  | 97   | 136  |
| Tbg972.8.3650 | <i>T. brucei</i> | 40  | 146  | 185  |
| Tbg972.8.3650 | <i>T. brucei</i> | 56  | 224  | 279  |
| Tbg972.8.3650 | <i>T. brucei</i> | 67  | 311  | 377  |
| Tbg972.8.3655 | <i>T. brucei</i> | 160 | 1    | 160  |
| Tbg972.8.3660 | <i>T. brucei</i> | 156 | 1    | 156  |
| Tbg972.8.3665 | <i>T. brucei</i> | 54  | 87   | 140  |
| Tbg972.8.3670 | <i>T. brucei</i> | 46  | 256  | 301  |
| Tbg972.8.3680 | <i>T. brucei</i> | 64  | 30   | 93   |
| Tbg972.8.3680 | <i>T. brucei</i> | 45  | 209  | 253  |
| Tbg972.8.3680 | <i>T. brucei</i> | 45  | 209  | 253  |
| Tbg972.8.3690 | <i>T. brucei</i> | 52  | 39   | 90   |
| Tbg972.8.3690 | <i>T. brucei</i> | 106 | 93   | 198  |
| Tbg972.8.3690 | <i>T. brucei</i> | 76  | 205  | 280  |
| Tbg972.8.3690 | <i>T. brucei</i> | 67  | 334  | 400  |
| Tbg972.8.3690 | <i>T. brucei</i> | 109 | 412  | 520  |
| Tbg972.8.3690 | <i>T. brucei</i> | 76  | 555  | 630  |
| Tbg972.8.3690 | <i>T. brucei</i> | 114 | 686  | 799  |

|               |                  |     |      |      |
|---------------|------------------|-----|------|------|
| Tbg972.8.3690 | <i>T. brucei</i> | 59  | 856  | 914  |
| Tbg972.8.370  | <i>T. brucei</i> | 250 | 74   | 323  |
| Tbg972.8.3700 | <i>T. brucei</i> | 86  | 419  | 504  |
| Tbg972.8.3720 | <i>T. brucei</i> | 223 | 1    | 223  |
| Tbg972.8.3720 | <i>T. brucei</i> | 101 | 394  | 494  |
| Tbg972.8.3720 | <i>T. brucei</i> | 67  | 639  | 705  |
| Tbg972.8.3760 | <i>T. brucei</i> | 80  | 328  | 407  |
| Tbg972.8.3770 | <i>T. brucei</i> | 104 | 96   | 199  |
| Tbg972.8.380  | <i>T. brucei</i> | 66  | 1    | 66   |
| Tbg972.8.380  | <i>T. brucei</i> | 54  | 550  | 603  |
| Tbg972.8.3815 | <i>T. brucei</i> | 104 | 96   | 199  |
| Tbg972.8.3830 | <i>T. brucei</i> | 287 | 100  | 386  |
| Tbg972.8.3840 | <i>T. brucei</i> | 49  | 51   | 99   |
| Tbg972.8.3850 | <i>T. brucei</i> | 63  | 22   | 84   |
| Tbg972.8.3850 | <i>T. brucei</i> | 41  | 754  | 794  |
| Tbg972.8.3850 | <i>T. brucei</i> | 62  | 1041 | 1102 |
| Tbg972.8.3870 | <i>T. brucei</i> | 54  | 13   | 66   |
| Tbg972.8.3870 | <i>T. brucei</i> | 209 | 112  | 320  |
| Tbg972.8.3870 | <i>T. brucei</i> | 40  | 394  | 433  |
| Tbg972.8.3870 | <i>T. brucei</i> | 50  | 715  | 764  |
| Tbg972.8.390  | <i>T. brucei</i> | 55  | 1    | 55   |
| Tbg972.8.390  | <i>T. brucei</i> | 928 | 98   | 1025 |
| Tbg972.8.3900 | <i>T. brucei</i> | 49  | 1    | 49   |
| Tbg972.8.3900 | <i>T. brucei</i> | 151 | 63   | 213  |
| Tbg972.8.3920 | <i>T. brucei</i> | 52  | 1    | 52   |
| Tbg972.8.3930 | <i>T. brucei</i> | 150 | 18   | 167  |
| Tbg972.8.3930 | <i>T. brucei</i> | 47  | 215  | 261  |
| Tbg972.8.3930 | <i>T. brucei</i> | 61  | 434  | 494  |
| Tbg972.8.3930 | <i>T. brucei</i> | 42  | 562  | 603  |
| Tbg972.8.3960 | <i>T. brucei</i> | 225 | 1    | 225  |
| Tbg972.8.3970 | <i>T. brucei</i> | 196 | 232  | 427  |
| Tbg972.8.3970 | <i>T. brucei</i> | 326 | 758  | 1083 |
| Tbg972.8.3980 | <i>T. brucei</i> | 103 | 34   | 136  |
| Tbg972.8.3980 | <i>T. brucei</i> | 68  | 747  | 814  |
| Tbg972.8.3980 | <i>T. brucei</i> | 358 | 1332 | 1689 |
| Tbg972.8.3990 | <i>T. brucei</i> | 140 | 33   | 172  |
| Tbg972.8.40   | <i>T. brucei</i> | 63  | 1    | 63   |
| Tbg972.8.40   | <i>T. brucei</i> | 55  | 88   | 142  |
| Tbg972.8.40   | <i>T. brucei</i> | 53  | 172  | 224  |
| Tbg972.8.400  | <i>T. brucei</i> | 43  | 1    | 43   |
| Tbg972.8.400  | <i>T. brucei</i> | 318 | 75   | 392  |
| Tbg972.8.400  | <i>T. brucei</i> | 50  | 447  | 496  |
| Tbg972.8.400  | <i>T. brucei</i> | 61  | 587  | 647  |
| Tbg972.8.400  | <i>T. brucei</i> | 43  | 1128 | 1170 |
| Tbg972.8.4000 | <i>T. brucei</i> | 152 | 1    | 152  |
| Tbg972.8.4000 | <i>T. brucei</i> | 266 | 222  | 487  |
| Tbg972.8.4010 | <i>T. brucei</i> | 52  | 41   | 92   |

|               |                  |     |      |      |
|---------------|------------------|-----|------|------|
| Tbg972.8.4030 | <i>T. brucei</i> | 77  | 46   | 122  |
| Tbg972.8.4050 | <i>T. brucei</i> | 40  | 1    | 40   |
| Tbg972.8.4060 | <i>T. brucei</i> | 85  | 17   | 101  |
| Tbg972.8.4060 | <i>T. brucei</i> | 84  | 131  | 214  |
| Tbg972.8.4060 | <i>T. brucei</i> | 41  | 255  | 295  |
| Tbg972.8.4060 | <i>T. brucei</i> | 157 | 346  | 502  |
| Tbg972.8.4060 | <i>T. brucei</i> | 42  | 536  | 577  |
| Tbg972.8.4070 | <i>T. brucei</i> | 104 | 284  | 387  |
| Tbg972.8.4070 | <i>T. brucei</i> | 435 | 454  | 888  |
| Tbg972.8.4070 | <i>T. brucei</i> | 95  | 1035 | 1129 |
| Tbg972.8.410  | <i>T. brucei</i> | 49  | 881  | 929  |
| Tbg972.8.410  | <i>T. brucei</i> | 87  | 1194 | 1280 |
| Tbg972.8.410  | <i>T. brucei</i> | 87  | 1194 | 1280 |
| Tbg972.8.4100 | <i>T. brucei</i> | 53  | 198  | 250  |
| Tbg972.8.4100 | <i>T. brucei</i> | 146 | 737  | 882  |
| Tbg972.8.4110 | <i>T. brucei</i> | 43  | 23   | 65   |
| Tbg972.8.4110 | <i>T. brucei</i> | 46  | 121  | 166  |
| Tbg972.8.4110 | <i>T. brucei</i> | 46  | 121  | 166  |
| Tbg972.8.4120 | <i>T. brucei</i> | 218 | 601  | 818  |
| Tbg972.8.4120 | <i>T. brucei</i> | 51  | 973  | 1023 |
| Tbg972.8.4120 | <i>T. brucei</i> | 84  | 1103 | 1186 |
| Tbg972.8.4130 | <i>T. brucei</i> | 138 | 1    | 138  |
| Tbg972.8.4130 | <i>T. brucei</i> | 272 | 343  | 614  |
| Tbg972.8.4130 | <i>T. brucei</i> | 49  | 769  | 817  |
| Tbg972.8.4150 | <i>T. brucei</i> | 90  | 132  | 221  |
| Tbg972.8.4160 | <i>T. brucei</i> | 107 | 1    | 107  |
| Tbg972.8.4160 | <i>T. brucei</i> | 59  | 121  | 179  |
| Tbg972.8.4160 | <i>T. brucei</i> | 184 | 255  | 438  |
| Tbg972.8.4160 | <i>T. brucei</i> | 125 | 544  | 668  |
| Tbg972.8.4180 | <i>T. brucei</i> | 72  | 1    | 72   |
| Tbg972.8.4200 | <i>T. brucei</i> | 51  | 1    | 51   |
| Tbg972.8.4210 | <i>T. brucei</i> | 153 | 1    | 153  |
| Tbg972.8.4210 | <i>T. brucei</i> | 126 | 303  | 428  |
| Tbg972.8.4220 | <i>T. brucei</i> | 136 | 142  | 277  |
| Tbg972.8.4220 | <i>T. brucei</i> | 41  | 360  | 400  |
| Tbg972.8.4220 | <i>T. brucei</i> | 53  | 791  | 843  |
| Tbg972.8.4230 | <i>T. brucei</i> | 61  | 125  | 185  |
| Tbg972.8.4240 | <i>T. brucei</i> | 48  | 46   | 93   |
| Tbg972.8.4250 | <i>T. brucei</i> | 107 | 26   | 132  |
| Tbg972.8.4250 | <i>T. brucei</i> | 47  | 234  | 280  |
| Tbg972.8.4250 | <i>T. brucei</i> | 69  | 313  | 381  |
| Tbg972.8.4250 | <i>T. brucei</i> | 42  | 410  | 451  |
| Tbg972.8.4260 | <i>T. brucei</i> | 82  | 1    | 82   |
| Tbg972.8.4260 | <i>T. brucei</i> | 56  | 131  | 186  |
| Tbg972.8.4260 | <i>T. brucei</i> | 44  | 382  | 425  |
| Tbg972.8.4270 | <i>T. brucei</i> | 125 | 68   | 192  |
| Tbg972.8.4270 | <i>T. brucei</i> | 117 | 381  | 497  |

|               |                  |     |      |      |
|---------------|------------------|-----|------|------|
| Tbg972.8.430  | <i>T. brucei</i> | 75  | 113  | 187  |
| Tbg972.8.4300 | <i>T. brucei</i> | 44  | 17   | 60   |
| Tbg972.8.4310 | <i>T. brucei</i> | 122 | 1    | 122  |
| Tbg972.8.4330 | <i>T. brucei</i> | 53  | 43   | 95   |
| Tbg972.8.4340 | <i>T. brucei</i> | 183 | 143  | 325  |
| Tbg972.8.4340 | <i>T. brucei</i> | 187 | 364  | 550  |
| Tbg972.8.4360 | <i>T. brucei</i> | 122 | 1    | 122  |
| Tbg972.8.4360 | <i>T. brucei</i> | 93  | 144  | 236  |
| Tbg972.8.4360 | <i>T. brucei</i> | 40  | 543  | 582  |
| Tbg972.8.4380 | <i>T. brucei</i> | 425 | 1    | 425  |
| Tbg972.8.4390 | <i>T. brucei</i> | 104 | 98   | 201  |
| Tbg972.8.4400 | <i>T. brucei</i> | 49  | 66   | 114  |
| Tbg972.8.4400 | <i>T. brucei</i> | 99  | 182  | 280  |
| Tbg972.8.4410 | <i>T. brucei</i> | 89  | 130  | 218  |
| Tbg972.8.4450 | <i>T. brucei</i> | 365 | 1    | 365  |
| Tbg972.8.4460 | <i>T. brucei</i> | 123 | 46   | 168  |
| Tbg972.8.4480 | <i>T. brucei</i> | 96  | 94   | 189  |
| Tbg972.8.4480 | <i>T. brucei</i> | 205 | 279  | 483  |
| Tbg972.8.4480 | <i>T. brucei</i> | 205 | 279  | 483  |
| Tbg972.8.4490 | <i>T. brucei</i> | 40  | 99   | 138  |
| Tbg972.8.450  | <i>T. brucei</i> | 86  | 78   | 163  |
| Tbg972.8.450  | <i>T. brucei</i> | 55  | 284  | 338  |
| Tbg972.8.450  | <i>T. brucei</i> | 100 | 666  | 765  |
| Tbg972.8.4510 | <i>T. brucei</i> | 67  | 47   | 113  |
| Tbg972.8.4520 | <i>T. brucei</i> | 67  | 61   | 127  |
| Tbg972.8.4530 | <i>T. brucei</i> | 73  | 47   | 119  |
| Tbg972.8.4570 | <i>T. brucei</i> | 65  | 1    | 65   |
| Tbg972.8.4580 | <i>T. brucei</i> | 43  | 173  | 215  |
| Tbg972.8.4590 | <i>T. brucei</i> | 77  | 1    | 77   |
| Tbg972.8.4590 | <i>T. brucei</i> | 41  | 1151 | 1191 |
| Tbg972.8.4590 | <i>T. brucei</i> | 43  | 1373 | 1415 |
| Tbg972.8.4590 | <i>T. brucei</i> | 70  | 1433 | 1502 |
| Tbg972.8.4590 | <i>T. brucei</i> | 119 | 1749 | 1867 |
| Tbg972.8.4590 | <i>T. brucei</i> | 47  | 1894 | 1940 |
| Tbg972.8.4590 | <i>T. brucei</i> | 105 | 1974 | 2078 |
| Tbg972.8.4590 | <i>T. brucei</i> | 44  | 2125 | 2168 |
| Tbg972.8.4590 | <i>T. brucei</i> | 75  | 2238 | 2312 |
| Tbg972.8.4590 | <i>T. brucei</i> | 70  | 2404 | 2473 |
| Tbg972.8.4590 | <i>T. brucei</i> | 105 | 2507 | 2611 |
| Tbg972.8.4590 | <i>T. brucei</i> | 44  | 2658 | 2701 |
| Tbg972.8.4590 | <i>T. brucei</i> | 72  | 2808 | 2879 |
| Tbg972.8.4590 | <i>T. brucei</i> | 70  | 2971 | 3040 |
| Tbg972.8.4590 | <i>T. brucei</i> | 105 | 3074 | 3178 |
| Tbg972.8.4590 | <i>T. brucei</i> | 72  | 3375 | 3446 |
| Tbg972.8.4590 | <i>T. brucei</i> | 70  | 3538 | 3607 |
| Tbg972.8.4590 | <i>T. brucei</i> | 102 | 3641 | 3742 |
| Tbg972.8.4590 | <i>T. brucei</i> | 44  | 3942 | 3985 |

|               |                  |     |      |      |
|---------------|------------------|-----|------|------|
| Tbg972.8.4590 | <i>T. brucei</i> | 408 | 3988 | 4395 |
| Tbg972.8.4590 | <i>T. brucei</i> | 97  | 4468 | 4564 |
| Tbg972.8.4590 | <i>T. brucei</i> | 88  | 4597 | 4684 |
| Tbg972.8.460  | <i>T. brucei</i> | 77  | 47   | 123  |
| Tbg972.8.460  | <i>T. brucei</i> | 78  | 487  | 564  |
| Tbg972.8.460  | <i>T. brucei</i> | 81  | 632  | 712  |
| Tbg972.8.460  | <i>T. brucei</i> | 51  | 729  | 779  |
| Tbg972.8.460  | <i>T. brucei</i> | 48  | 1025 | 1072 |
| Tbg972.8.4600 | <i>T. brucei</i> | 89  | 208  | 296  |
| Tbg972.8.4610 | <i>T. brucei</i> | 42  | 284  | 325  |
| Tbg972.8.4610 | <i>T. brucei</i> | 55  | 363  | 417  |
| Tbg972.8.4610 | <i>T. brucei</i> | 55  | 363  | 417  |
| Tbg972.8.4630 | <i>T. brucei</i> | 79  | 284  | 362  |
| Tbg972.8.4640 | <i>T. brucei</i> | 109 | 1    | 109  |
| Tbg972.8.4640 | <i>T. brucei</i> | 86  | 193  | 278  |
| Tbg972.8.4650 | <i>T. brucei</i> | 52  | 487  | 538  |
| Tbg972.8.4650 | <i>T. brucei</i> | 43  | 599  | 641  |
| Tbg972.8.4650 | <i>T. brucei</i> | 43  | 599  | 641  |
| Tbg972.8.4660 | <i>T. brucei</i> | 73  | 156  | 228  |
| Tbg972.8.4680 | <i>T. brucei</i> | 349 | 677  | 1025 |
| Tbg972.8.4680 | <i>T. brucei</i> | 54  | 1067 | 1120 |
| Tbg972.8.4680 | <i>T. brucei</i> | 53  | 1152 | 1204 |
| Tbg972.8.4690 | <i>T. brucei</i> | 203 | 1    | 203  |
| Tbg972.8.470  | <i>T. brucei</i> | 58  | 1    | 58   |
| Tbg972.8.470  | <i>T. brucei</i> | 48  | 256  | 303  |
| Tbg972.8.470  | <i>T. brucei</i> | 51  | 436  | 486  |
| Tbg972.8.4710 | <i>T. brucei</i> | 86  | 17   | 102  |
| Tbg972.8.4720 | <i>T. brucei</i> | 71  | 237  | 307  |
| Tbg972.8.4720 | <i>T. brucei</i> | 59  | 360  | 418  |
| Tbg972.8.4720 | <i>T. brucei</i> | 71  | 737  | 807  |
| Tbg972.8.4720 | <i>T. brucei</i> | 64  | 965  | 1028 |
| Tbg972.8.4760 | <i>T. brucei</i> | 66  | 1    | 66   |
| Tbg972.8.4760 | <i>T. brucei</i> | 40  | 235  | 274  |
| Tbg972.8.4760 | <i>T. brucei</i> | 40  | 235  | 274  |
| Tbg972.8.4770 | <i>T. brucei</i> | 138 | 1    | 138  |
| Tbg972.8.4770 | <i>T. brucei</i> | 879 | 548  | 1426 |
| Tbg972.8.4780 | <i>T. brucei</i> | 171 | 104  | 274  |
| Tbg972.8.4780 | <i>T. brucei</i> | 67  | 742  | 808  |
| Tbg972.8.4780 | <i>T. brucei</i> | 52  | 906  | 957  |
| Tbg972.8.4790 | <i>T. brucei</i> | 121 | 259  | 379  |
| Tbg972.8.4790 | <i>T. brucei</i> | 43  | 489  | 531  |
| Tbg972.8.4790 | <i>T. brucei</i> | 58  | 543  | 600  |
| Tbg972.8.480  | <i>T. brucei</i> | 135 | 71   | 205  |
| Tbg972.8.4800 | <i>T. brucei</i> | 121 | 259  | 379  |
| Tbg972.8.4800 | <i>T. brucei</i> | 43  | 489  | 531  |
| Tbg972.8.4800 | <i>T. brucei</i> | 58  | 543  | 600  |
| Tbg972.8.4810 | <i>T. brucei</i> | 118 | 222  | 339  |

|               |                  |     |      |      |
|---------------|------------------|-----|------|------|
| Tbg972.8.4820 | <i>T. brucei</i> | 60  | 52   | 111  |
| Tbg972.8.4840 | <i>T. brucei</i> | 41  | 176  | 216  |
| Tbg972.8.4860 | <i>T. brucei</i> | 65  | 1    | 65   |
| Tbg972.8.4860 | <i>T. brucei</i> | 159 | 118  | 276  |
| Tbg972.8.4860 | <i>T. brucei</i> | 42  | 395  | 436  |
| Tbg972.8.4860 | <i>T. brucei</i> | 241 | 477  | 717  |
| Tbg972.8.4870 | <i>T. brucei</i> | 71  | 1    | 71   |
| Tbg972.8.4890 | <i>T. brucei</i> | 52  | 1    | 52   |
| Tbg972.8.4910 | <i>T. brucei</i> | 62  | 1075 | 1136 |
| Tbg972.8.4910 | <i>T. brucei</i> | 188 | 1337 | 1524 |
| Tbg972.8.4930 | <i>T. brucei</i> | 42  | 24   | 65   |
| Tbg972.8.4930 | <i>T. brucei</i> | 46  | 222  | 267  |
| Tbg972.8.4930 | <i>T. brucei</i> | 89  | 510  | 598  |
| Tbg972.8.4930 | <i>T. brucei</i> | 43  | 1164 | 1206 |
| Tbg972.8.4930 | <i>T. brucei</i> | 41  | 1345 | 1385 |
| Tbg972.8.4930 | <i>T. brucei</i> | 54  | 1620 | 1673 |
| Tbg972.8.4930 | <i>T. brucei</i> | 51  | 1690 | 1740 |
| Tbg972.8.4930 | <i>T. brucei</i> | 68  | 2131 | 2198 |
| Tbg972.8.4930 | <i>T. brucei</i> | 53  | 2296 | 2348 |
| Tbg972.8.4930 | <i>T. brucei</i> | 93  | 2509 | 2601 |
| Tbg972.8.4930 | <i>T. brucei</i> | 86  | 2623 | 2708 |
| Tbg972.8.4930 | <i>T. brucei</i> | 44  | 2837 | 2880 |
| Tbg972.8.4940 | <i>T. brucei</i> | 505 | 1    | 505  |
| Tbg972.8.4940 | <i>T. brucei</i> | 98  | 585  | 682  |
| Tbg972.8.4970 | <i>T. brucei</i> | 78  | 1    | 78   |
| Tbg972.8.4980 | <i>T. brucei</i> | 42  | 32   | 73   |
| Tbg972.8.4980 | <i>T. brucei</i> | 96  | 220  | 315  |
| Tbg972.8.4990 | <i>T. brucei</i> | 50  | 1    | 50   |
| Tbg972.8.4990 | <i>T. brucei</i> | 64  | 368  | 431  |
| Tbg972.8.4990 | <i>T. brucei</i> | 64  | 368  | 431  |
| Tbg972.8.500  | <i>T. brucei</i> | 54  | 40   | 93   |
| Tbg972.8.500  | <i>T. brucei</i> | 158 | 126  | 283  |
| Tbg972.8.500  | <i>T. brucei</i> | 439 | 311  | 749  |
| Tbg972.8.5010 | <i>T. brucei</i> | 43  | 29   | 71   |
| Tbg972.8.5010 | <i>T. brucei</i> | 92  | 261  | 352  |
| Tbg972.8.5010 | <i>T. brucei</i> | 51  | 383  | 433  |
| Tbg972.8.5010 | <i>T. brucei</i> | 42  | 511  | 552  |
| Tbg972.8.5010 | <i>T. brucei</i> | 109 | 683  | 791  |
| Tbg972.8.5050 | <i>T. brucei</i> | 80  | 1    | 80   |
| Tbg972.8.5050 | <i>T. brucei</i> | 43  | 507  | 549  |
| Tbg972.8.5050 | <i>T. brucei</i> | 40  | 852  | 891  |
| Tbg972.8.5050 | <i>T. brucei</i> | 61  | 922  | 982  |
| Tbg972.8.5050 | <i>T. brucei</i> | 44  | 1057 | 1100 |
| Tbg972.8.510  | <i>T. brucei</i> | 43  | 166  | 208  |
| Tbg972.8.5100 | <i>T. brucei</i> | 46  | 648  | 693  |
| Tbg972.8.5100 | <i>T. brucei</i> | 43  | 923  | 965  |
| Tbg972.8.5100 | <i>T. brucei</i> | 61  | 1311 | 1371 |

|               |                  |     |      |      |
|---------------|------------------|-----|------|------|
| Tbg972.8.5100 | <i>T. brucei</i> | 162 | 1627 | 1788 |
| Tbg972.8.5110 | <i>T. brucei</i> | 89  | 277  | 365  |
| Tbg972.8.5110 | <i>T. brucei</i> | 41  | 503  | 543  |
| Tbg972.8.5110 | <i>T. brucei</i> | 42  | 803  | 844  |
| Tbg972.8.5130 | <i>T. brucei</i> | 65  | 1    | 65   |
| Tbg972.8.5130 | <i>T. brucei</i> | 46  | 74   | 119  |
| Tbg972.8.5130 | <i>T. brucei</i> | 119 | 217  | 335  |
| Tbg972.8.5130 | <i>T. brucei</i> | 89  | 831  | 919  |
| Tbg972.8.5130 | <i>T. brucei</i> | 105 | 944  | 1048 |
| Tbg972.8.5150 | <i>T. brucei</i> | 73  | 123  | 195  |
| Tbg972.8.5150 | <i>T. brucei</i> | 52  | 914  | 965  |
| Tbg972.8.5150 | <i>T. brucei</i> | 52  | 914  | 965  |
| Tbg972.8.5160 | <i>T. brucei</i> | 120 | 125  | 244  |
| Tbg972.8.5190 | <i>T. brucei</i> | 52  | 313  | 364  |
| Tbg972.8.520  | <i>T. brucei</i> | 465 | 1    | 465  |
| Tbg972.8.5200 | <i>T. brucei</i> | 137 | 225  | 361  |
| Tbg972.8.5200 | <i>T. brucei</i> | 91  | 433  | 523  |
| Tbg972.8.5220 | <i>T. brucei</i> | 123 | 1    | 123  |
| Tbg972.8.5220 | <i>T. brucei</i> | 163 | 183  | 345  |
| Tbg972.8.5220 | <i>T. brucei</i> | 214 | 349  | 562  |
| Tbg972.8.5240 | <i>T. brucei</i> | 106 | 1    | 106  |
| Tbg972.8.5280 | <i>T. brucei</i> | 56  | 1    | 56   |
| Tbg972.8.5295 | <i>T. brucei</i> | 44  | 1    | 44   |
| Tbg972.8.5295 | <i>T. brucei</i> | 65  | 131  | 195  |
| Tbg972.8.5295 | <i>T. brucei</i> | 65  | 131  | 195  |
| Tbg972.8.530  | <i>T. brucei</i> | 111 | 83   | 193  |
| Tbg972.8.530  | <i>T. brucei</i> | 48  | 265  | 312  |
| Tbg972.8.530  | <i>T. brucei</i> | 48  | 265  | 312  |
| Tbg972.8.5300 | <i>T. brucei</i> | 42  | 1    | 42   |
| Tbg972.8.5300 | <i>T. brucei</i> | 51  | 55   | 105  |
| Tbg972.8.5300 | <i>T. brucei</i> | 52  | 111  | 162  |
| Tbg972.8.5310 | <i>T. brucei</i> | 131 | 45   | 175  |
| Tbg972.8.5320 | <i>T. brucei</i> | 65  | 1    | 65   |
| Tbg972.8.5340 | <i>T. brucei</i> | 68  | 140  | 207  |
| Tbg972.8.5340 | <i>T. brucei</i> | 60  | 295  | 354  |
| Tbg972.8.5350 | <i>T. brucei</i> | 97  | 1    | 97   |
| Tbg972.8.5350 | <i>T. brucei</i> | 776 | 137  | 912  |
| Tbg972.8.5380 | <i>T. brucei</i> | 55  | 164  | 218  |
| Tbg972.8.5380 | <i>T. brucei</i> | 58  | 224  | 281  |
| Tbg972.8.5380 | <i>T. brucei</i> | 58  | 224  | 281  |
| Tbg972.8.5390 | <i>T. brucei</i> | 52  | 164  | 215  |
| Tbg972.8.540  | <i>T. brucei</i> | 48  | 631  | 678  |
| Tbg972.8.540  | <i>T. brucei</i> | 76  | 1689 | 1764 |
| Tbg972.8.540  | <i>T. brucei</i> | 44  | 1868 | 1911 |
| Tbg972.8.540  | <i>T. brucei</i> | 57  | 2017 | 2073 |
| Tbg972.8.540  | <i>T. brucei</i> | 46  | 2149 | 2194 |
| Tbg972.8.5410 | <i>T. brucei</i> | 53  | 1    | 53   |



|               |                  |     |      |      |
|---------------|------------------|-----|------|------|
| Tbg972.8.5420 | <i>T. brucei</i> | 78  | 1    | 78   |
| Tbg972.8.5430 | <i>T. brucei</i> | 53  | 1    | 53   |
| Tbg972.8.5450 | <i>T. brucei</i> | 57  | 1    | 57   |
| Tbg972.8.5450 | <i>T. brucei</i> | 105 | 87   | 191  |
| Tbg972.8.5450 | <i>T. brucei</i> | 67  | 275  | 341  |
| Tbg972.8.5460 | <i>T. brucei</i> | 41  | 1    | 41   |
| Tbg972.8.5460 | <i>T. brucei</i> | 86  | 92   | 177  |
| Tbg972.8.5460 | <i>T. brucei</i> | 57  | 277  | 333  |
| Tbg972.8.5460 | <i>T. brucei</i> | 52  | 420  | 471  |
| Tbg972.8.5460 | <i>T. brucei</i> | 99  | 525  | 623  |
| Tbg972.8.5470 | <i>T. brucei</i> | 82  | 46   | 127  |
| Tbg972.8.5480 | <i>T. brucei</i> | 88  | 1    | 88   |
| Tbg972.8.5490 | <i>T. brucei</i> | 63  | 65   | 127  |
| Tbg972.8.550  | <i>T. brucei</i> | 112 | 82   | 193  |
| Tbg972.8.550  | <i>T. brucei</i> | 48  | 265  | 312  |
| Tbg972.8.550  | <i>T. brucei</i> | 48  | 265  | 312  |
| Tbg972.8.5500 | <i>T. brucei</i> | 68  | 291  | 358  |
| Tbg972.8.5510 | <i>T. brucei</i> | 88  | 30   | 117  |
| Tbg972.8.5510 | <i>T. brucei</i> | 50  | 153  | 202  |
| Tbg972.8.5520 | <i>T. brucei</i> | 47  | 113  | 159  |
| Tbg972.8.5530 | <i>T. brucei</i> | 58  | 147  | 204  |
| Tbg972.8.5540 | <i>T. brucei</i> | 52  | 112  | 163  |
| Tbg972.8.5540 | <i>T. brucei</i> | 83  | 240  | 322  |
| Tbg972.8.5540 | <i>T. brucei</i> | 83  | 240  | 322  |
| Tbg972.8.5560 | <i>T. brucei</i> | 74  | 131  | 204  |
| Tbg972.8.5560 | <i>T. brucei</i> | 75  | 485  | 559  |
| Tbg972.8.5560 | <i>T. brucei</i> | 41  | 619  | 659  |
| Tbg972.8.5560 | <i>T. brucei</i> | 63  | 924  | 986  |
| Tbg972.8.5560 | <i>T. brucei</i> | 98  | 1237 | 1334 |
| Tbg972.8.5560 | <i>T. brucei</i> | 113 | 1479 | 1591 |
| Tbg972.8.5560 | <i>T. brucei</i> | 54  | 1680 | 1733 |
| Tbg972.8.5560 | <i>T. brucei</i> | 74  | 1865 | 1938 |
| Tbg972.8.5560 | <i>T. brucei</i> | 59  | 2616 | 2674 |
| Tbg972.8.5560 | <i>T. brucei</i> | 76  | 2975 | 3050 |
| Tbg972.8.5560 | <i>T. brucei</i> | 45  | 3324 | 3368 |
| Tbg972.8.5560 | <i>T. brucei</i> | 58  | 3999 | 4056 |
| Tbg972.8.5560 | <i>T. brucei</i> | 51  | 4556 | 4606 |
| Tbg972.8.5560 | <i>T. brucei</i> | 60  | 4657 | 4716 |
| Tbg972.8.5570 | <i>T. brucei</i> | 40  | 1    | 40   |
| Tbg972.8.5580 | <i>T. brucei</i> | 40  | 1    | 40   |
| Tbg972.8.5580 | <i>T. brucei</i> | 71  | 76   | 146  |
| Tbg972.8.560  | <i>T. brucei</i> | 45  | 524  | 568  |
| Tbg972.8.5600 | <i>T. brucei</i> | 60  | 263  | 322  |
| Tbg972.8.5610 | <i>T. brucei</i> | 56  | 109  | 164  |
| Tbg972.8.5610 | <i>T. brucei</i> | 45  | 234  | 278  |
| Tbg972.8.5610 | <i>T. brucei</i> | 48  | 353  | 400  |
| Tbg972.8.5620 | <i>T. brucei</i> | 42  | 574  | 615  |

|               |                  |     |      |      |
|---------------|------------------|-----|------|------|
| Tbg972.8.5620 | <i>T. brucei</i> | 77  | 939  | 1015 |
| Tbg972.8.5620 | <i>T. brucei</i> | 48  | 1271 | 1318 |
| Tbg972.8.5630 | <i>T. brucei</i> | 43  | 146  | 188  |
| Tbg972.8.5650 | <i>T. brucei</i> | 50  | 36   | 85   |
| Tbg972.8.5650 | <i>T. brucei</i> | 96  | 118  | 213  |
| Tbg972.8.5650 | <i>T. brucei</i> | 42  | 248  | 289  |
| Tbg972.8.5650 | <i>T. brucei</i> | 231 | 338  | 568  |
| Tbg972.8.5670 | <i>T. brucei</i> | 90  | 1    | 90   |
| Tbg972.8.5670 | <i>T. brucei</i> | 73  | 102  | 174  |
| Tbg972.8.5680 | <i>T. brucei</i> | 76  | 166  | 241  |
| Tbg972.8.5690 | <i>T. brucei</i> | 99  | 1    | 99   |
| Tbg972.8.570  | <i>T. brucei</i> | 117 | 94   | 210  |
| Tbg972.8.570  | <i>T. brucei</i> | 108 | 212  | 319  |
| Tbg972.8.5700 | <i>T. brucei</i> | 65  | 1    | 65   |
| Tbg972.8.5710 | <i>T. brucei</i> | 94  | 377  | 470  |
| Tbg972.8.5710 | <i>T. brucei</i> | 190 | 478  | 667  |
| Tbg972.8.5710 | <i>T. brucei</i> | 76  | 716  | 791  |
| Tbg972.8.5720 | <i>T. brucei</i> | 46  | 228  | 273  |
| Tbg972.8.5730 | <i>T. brucei</i> | 56  | 296  | 351  |
| Tbg972.8.5740 | <i>T. brucei</i> | 54  | 74   | 127  |
| Tbg972.8.5760 | <i>T. brucei</i> | 59  | 68   | 126  |
| Tbg972.8.5770 | <i>T. brucei</i> | 56  | 1    | 56   |
| Tbg972.8.5770 | <i>T. brucei</i> | 42  | 237  | 278  |
| Tbg972.8.5770 | <i>T. brucei</i> | 40  | 618  | 657  |
| Tbg972.8.580  | <i>T. brucei</i> | 44  | 107  | 150  |
| Tbg972.8.580  | <i>T. brucei</i> | 87  | 171  | 257  |
| Tbg972.8.580  | <i>T. brucei</i> | 87  | 171  | 257  |
| Tbg972.8.5800 | <i>T. brucei</i> | 85  | 74   | 158  |
| Tbg972.8.5820 | <i>T. brucei</i> | 114 | 1    | 114  |
| Tbg972.8.5820 | <i>T. brucei</i> | 81  | 298  | 378  |
| Tbg972.8.5830 | <i>T. brucei</i> | 44  | 234  | 277  |
| Tbg972.8.5840 | <i>T. brucei</i> | 197 | 1    | 197  |
| Tbg972.8.5850 | <i>T. brucei</i> | 149 | 144  | 292  |
| Tbg972.8.5850 | <i>T. brucei</i> | 95  | 322  | 416  |
| Tbg972.8.5850 | <i>T. brucei</i> | 41  | 1169 | 1209 |
| Tbg972.8.5850 | <i>T. brucei</i> | 296 | 1385 | 1680 |
| Tbg972.8.5850 | <i>T. brucei</i> | 47  | 1778 | 1824 |
| Tbg972.8.5850 | <i>T. brucei</i> | 44  | 2108 | 2151 |
| Tbg972.8.5850 | <i>T. brucei</i> | 45  | 2375 | 2419 |
| Tbg972.8.5850 | <i>T. brucei</i> | 54  | 2692 | 2745 |
| Tbg972.8.5850 | <i>T. brucei</i> | 77  | 2819 | 2895 |
| Tbg972.8.5850 | <i>T. brucei</i> | 95  | 3096 | 3190 |
| Tbg972.8.5850 | <i>T. brucei</i> | 54  | 3223 | 3276 |
| Tbg972.8.5850 | <i>T. brucei</i> | 57  | 3388 | 3444 |
| Tbg972.8.5850 | <i>T. brucei</i> | 97  | 3812 | 3908 |
| Tbg972.8.5850 | <i>T. brucei</i> | 85  | 4049 | 4133 |
| Tbg972.8.5860 | <i>T. brucei</i> | 53  | 249  | 301  |

|               |                  |     |      |      |
|---------------|------------------|-----|------|------|
| Tbg972.8.5870 | <i>T. brucei</i> | 47  | 52   | 98   |
| Tbg972.8.5880 | <i>T. brucei</i> | 42  | 1    | 42   |
| Tbg972.8.5880 | <i>T. brucei</i> | 58  | 115  | 172  |
| Tbg972.8.5880 | <i>T. brucei</i> | 58  | 115  | 172  |
| Tbg972.8.5890 | <i>T. brucei</i> | 69  | 156  | 224  |
| Tbg972.8.590  | <i>T. brucei</i> | 55  | 33   | 87   |
| Tbg972.8.590  | <i>T. brucei</i> | 96  | 169  | 264  |
| Tbg972.8.590  | <i>T. brucei</i> | 72  | 320  | 391  |
| Tbg972.8.590  | <i>T. brucei</i> | 40  | 419  | 458  |
| Tbg972.8.5900 | <i>T. brucei</i> | 46  | 1    | 46   |
| Tbg972.8.5910 | <i>T. brucei</i> | 49  | 44   | 92   |
| Tbg972.8.5910 | <i>T. brucei</i> | 42  | 232  | 273  |
| Tbg972.8.5910 | <i>T. brucei</i> | 42  | 232  | 273  |
| Tbg972.8.5920 | <i>T. brucei</i> | 72  | 1    | 72   |
| Tbg972.8.5920 | <i>T. brucei</i> | 113 | 157  | 269  |
| Tbg972.8.5920 | <i>T. brucei</i> | 113 | 157  | 269  |
| Tbg972.8.5930 | <i>T. brucei</i> | 147 | 25   | 171  |
| Tbg972.8.5940 | <i>T. brucei</i> | 77  | 45   | 121  |
| Tbg972.8.5940 | <i>T. brucei</i> | 138 | 177  | 314  |
| Tbg972.8.5950 | <i>T. brucei</i> | 58  | 1    | 58   |
| Tbg972.8.5960 | <i>T. brucei</i> | 87  | 79   | 165  |
| Tbg972.8.5980 | <i>T. brucei</i> | 49  | 771  | 819  |
| Tbg972.8.5990 | <i>T. brucei</i> | 41  | 84   | 124  |
| Tbg972.8.6060 | <i>T. brucei</i> | 48  | 1    | 48   |
| Tbg972.8.6080 | <i>T. brucei</i> | 74  | 1    | 74   |
| Tbg972.8.610  | <i>T. brucei</i> | 123 | 45   | 167  |
| Tbg972.8.6100 | <i>T. brucei</i> | 63  | 31   | 93   |
| Tbg972.8.6100 | <i>T. brucei</i> | 880 | 100  | 979  |
| Tbg972.8.6100 | <i>T. brucei</i> | 376 | 1037 | 1412 |
| Tbg972.8.6130 | <i>T. brucei</i> | 130 | 55   | 184  |
| Tbg972.8.6130 | <i>T. brucei</i> | 47  | 997  | 1043 |
| Tbg972.8.6140 | <i>T. brucei</i> | 41  | 15   | 55   |
| Tbg972.8.615  | <i>T. brucei</i> | 144 | 1    | 144  |
| Tbg972.8.6170 | <i>T. brucei</i> | 99  | 1    | 99   |
| Tbg972.8.6180 | <i>T. brucei</i> | 41  | 190  | 230  |
| Tbg972.8.6180 | <i>T. brucei</i> | 65  | 232  | 296  |
| Tbg972.8.6180 | <i>T. brucei</i> | 65  | 232  | 296  |
| Tbg972.8.620  | <i>T. brucei</i> | 131 | 1    | 131  |
| Tbg972.8.620  | <i>T. brucei</i> | 72  | 174  | 245  |
| Tbg972.8.620  | <i>T. brucei</i> | 46  | 371  | 416  |
| Tbg972.8.620  | <i>T. brucei</i> | 57  | 592  | 648  |
| Tbg972.8.620  | <i>T. brucei</i> | 72  | 1101 | 1172 |
| Tbg972.8.620  | <i>T. brucei</i> | 87  | 1616 | 1702 |
| Tbg972.8.620  | <i>T. brucei</i> | 68  | 2056 | 2123 |
| Tbg972.8.620  | <i>T. brucei</i> | 67  | 2258 | 2324 |
| Tbg972.8.620  | <i>T. brucei</i> | 47  | 2449 | 2495 |
| Tbg972.8.620  | <i>T. brucei</i> | 147 | 2507 | 2653 |

|               |                  |     |     |     |
|---------------|------------------|-----|-----|-----|
| Tbg972.8.6200 | <i>T. brucei</i> | 71  | 132 | 202 |
| Tbg972.8.6210 | <i>T. brucei</i> | 52  | 1   | 52  |
| Tbg972.8.6210 | <i>T. brucei</i> | 99  | 122 | 220 |
| Tbg972.8.6210 | <i>T. brucei</i> | 99  | 122 | 220 |
| Tbg972.8.6220 | <i>T. brucei</i> | 52  | 1   | 52  |
| Tbg972.8.6220 | <i>T. brucei</i> | 99  | 122 | 220 |
| Tbg972.8.6220 | <i>T. brucei</i> | 99  | 122 | 220 |
| Tbg972.8.6230 | <i>T. brucei</i> | 46  | 318 | 363 |
| Tbg972.8.6240 | <i>T. brucei</i> | 62  | 1   | 62  |
| Tbg972.8.6260 | <i>T. brucei</i> | 79  | 1   | 79  |
| Tbg972.8.6260 | <i>T. brucei</i> | 45  | 400 | 444 |
| Tbg972.8.6270 | <i>T. brucei</i> | 61  | 48  | 108 |
| Tbg972.8.6270 | <i>T. brucei</i> | 56  | 191 | 246 |
| Tbg972.8.6270 | <i>T. brucei</i> | 56  | 191 | 246 |
| Tbg972.8.6280 | <i>T. brucei</i> | 47  | 74  | 120 |
| Tbg972.8.6290 | <i>T. brucei</i> | 288 | 25  | 312 |
| Tbg972.8.6300 | <i>T. brucei</i> | 208 | 45  | 252 |
| Tbg972.8.6310 | <i>T. brucei</i> | 83  | 157 | 239 |
| Tbg972.8.6320 | <i>T. brucei</i> | 226 | 1   | 226 |
| Tbg972.8.6320 | <i>T. brucei</i> | 76  | 286 | 361 |
| Tbg972.8.6320 | <i>T. brucei</i> | 159 | 394 | 552 |
| Tbg972.8.6320 | <i>T. brucei</i> | 41  | 770 | 810 |
| Tbg972.8.6330 | <i>T. brucei</i> | 56  | 414 | 469 |
| Tbg972.8.6360 | <i>T. brucei</i> | 47  | 1   | 47  |
| Tbg972.8.6360 | <i>T. brucei</i> | 71  | 120 | 190 |
| Tbg972.8.6360 | <i>T. brucei</i> | 206 | 280 | 485 |
| Tbg972.8.6390 | <i>T. brucei</i> | 40  | 515 | 554 |
| Tbg972.8.640  | <i>T. brucei</i> | 94  | 1   | 94  |
| Tbg972.8.640  | <i>T. brucei</i> | 217 | 102 | 318 |
| Tbg972.8.640  | <i>T. brucei</i> | 134 | 343 | 476 |
| Tbg972.8.640  | <i>T. brucei</i> | 163 | 490 | 652 |
| Tbg972.8.640  | <i>T. brucei</i> | 102 | 678 | 779 |
| Tbg972.8.6400 | <i>T. brucei</i> | 51  | 27  | 77  |
| Tbg972.8.6410 | <i>T. brucei</i> | 40  | 88  | 127 |
| Tbg972.8.6420 | <i>T. brucei</i> | 54  | 12  | 65  |
| Tbg972.8.6420 | <i>T. brucei</i> | 40  | 148 | 187 |
| Tbg972.8.6420 | <i>T. brucei</i> | 86  | 354 | 439 |
| Tbg972.8.6420 | <i>T. brucei</i> | 40  | 584 | 623 |
| Tbg972.8.6420 | <i>T. brucei</i> | 70  | 805 | 874 |
| Tbg972.8.6430 | <i>T. brucei</i> | 243 | 1   | 243 |
| Tbg972.8.6430 | <i>T. brucei</i> | 147 | 257 | 403 |
| Tbg972.8.645  | <i>T. brucei</i> | 59  | 138 | 196 |
| Tbg972.8.6460 | <i>T. brucei</i> | 92  | 29  | 120 |
| Tbg972.8.6460 | <i>T. brucei</i> | 63  | 122 | 184 |
| Tbg972.8.6460 | <i>T. brucei</i> | 40  | 197 | 236 |
| Tbg972.8.6480 | <i>T. brucei</i> | 55  | 1   | 55  |
| Tbg972.8.6480 | <i>T. brucei</i> | 66  | 331 | 396 |

|               |                  |     |      |      |
|---------------|------------------|-----|------|------|
| Tbg972.8.6480 | <i>T. brucei</i> | 66  | 331  | 396  |
| Tbg972.8.650  | <i>T. brucei</i> | 260 | 1    | 260  |
| Tbg972.8.650  | <i>T. brucei</i> | 45  | 557  | 601  |
| Tbg972.8.650  | <i>T. brucei</i> | 70  | 677  | 746  |
| Tbg972.8.6500 | <i>T. brucei</i> | 44  | 57   | 100  |
| Tbg972.8.6510 | <i>T. brucei</i> | 122 | 1    | 122  |
| Tbg972.8.6540 | <i>T. brucei</i> | 42  | 57   | 98   |
| Tbg972.8.6550 | <i>T. brucei</i> | 46  | 148  | 193  |
| Tbg972.8.6560 | <i>T. brucei</i> | 52  | 112  | 163  |
| Tbg972.8.6580 | <i>T. brucei</i> | 248 | 1    | 248  |
| Tbg972.8.6580 | <i>T. brucei</i> | 51  | 546  | 596  |
| Tbg972.8.6590 | <i>T. brucei</i> | 51  | 145  | 195  |
| Tbg972.8.660  | <i>T. brucei</i> | 74  | 479  | 552  |
| Tbg972.8.660  | <i>T. brucei</i> | 58  | 631  | 688  |
| Tbg972.8.660  | <i>T. brucei</i> | 40  | 796  | 835  |
| Tbg972.8.6600 | <i>T. brucei</i> | 182 | 1    | 182  |
| Tbg972.8.6610 | <i>T. brucei</i> | 44  | 1    | 44   |
| Tbg972.8.6620 | <i>T. brucei</i> | 41  | 75   | 115  |
| Tbg972.8.6650 | <i>T. brucei</i> | 81  | 173  | 253  |
| Tbg972.8.6730 | <i>T. brucei</i> | 50  | 52   | 101  |
| Tbg972.8.6790 | <i>T. brucei</i> | 47  | 287  | 333  |
| Tbg972.8.6800 | <i>T. brucei</i> | 212 | 1    | 212  |
| Tbg972.8.6810 | <i>T. brucei</i> | 70  | 365  | 434  |
| Tbg972.8.6820 | <i>T. brucei</i> | 85  | 30   | 114  |
| Tbg972.8.6820 | <i>T. brucei</i> | 54  | 217  | 270  |
| Tbg972.8.6820 | <i>T. brucei</i> | 149 | 443  | 591  |
| Tbg972.8.6820 | <i>T. brucei</i> | 70  | 597  | 666  |
| Tbg972.8.6840 | <i>T. brucei</i> | 51  | 269  | 319  |
| Tbg972.8.6840 | <i>T. brucei</i> | 94  | 349  | 442  |
| Tbg972.8.6840 | <i>T. brucei</i> | 42  | 566  | 607  |
| Tbg972.8.6850 | <i>T. brucei</i> | 57  | 176  | 232  |
| Tbg972.8.6850 | <i>T. brucei</i> | 42  | 247  | 288  |
| Tbg972.8.6870 | <i>T. brucei</i> | 58  | 17   | 74   |
| Tbg972.8.6870 | <i>T. brucei</i> | 61  | 79   | 139  |
| Tbg972.8.6870 | <i>T. brucei</i> | 103 | 141  | 243  |
| Tbg972.8.6870 | <i>T. brucei</i> | 126 | 248  | 373  |
| Tbg972.8.6870 | <i>T. brucei</i> | 221 | 983  | 1203 |
| Tbg972.8.6870 | <i>T. brucei</i> | 200 | 1299 | 1498 |
| Tbg972.8.6880 | <i>T. brucei</i> | 46  | 331  | 376  |
| Tbg972.8.6890 | <i>T. brucei</i> | 42  | 574  | 615  |
| Tbg972.8.690  | <i>T. brucei</i> | 80  | 1    | 80   |
| Tbg972.8.6900 | <i>T. brucei</i> | 81  | 353  | 433  |
| Tbg972.8.6910 | <i>T. brucei</i> | 218 | 110  | 327  |
| Tbg972.8.6920 | <i>T. brucei</i> | 42  | 18   | 59   |
| Tbg972.8.6950 | <i>T. brucei</i> | 95  | 1    | 95   |
| Tbg972.8.6960 | <i>T. brucei</i> | 44  | 1    | 44   |
| Tbg972.8.6960 | <i>T. brucei</i> | 83  | 287  | 369  |

|               |                  |     |      |      |
|---------------|------------------|-----|------|------|
| Tbg972.8.6960 | <i>T. brucei</i> | 83  | 287  | 369  |
| Tbg972.8.6980 | <i>T. brucei</i> | 56  | 144  | 199  |
| Tbg972.8.6980 | <i>T. brucei</i> | 62  | 674  | 735  |
| Tbg972.8.6980 | <i>T. brucei</i> | 149 | 1169 | 1317 |
| Tbg972.8.6980 | <i>T. brucei</i> | 116 | 1336 | 1451 |
| Tbg972.8.6990 | <i>T. brucei</i> | 82  | 1    | 82   |
| Tbg972.8.6990 | <i>T. brucei</i> | 47  | 385  | 431  |
| Tbg972.8.6990 | <i>T. brucei</i> | 47  | 385  | 431  |
| Tbg972.8.700  | <i>T. brucei</i> | 70  | 124  | 193  |
| Tbg972.8.700  | <i>T. brucei</i> | 59  | 602  | 660  |
| Tbg972.8.700  | <i>T. brucei</i> | 41  | 824  | 864  |
| Tbg972.8.700  | <i>T. brucei</i> | 93  | 940  | 1032 |
| Tbg972.8.700  | <i>T. brucei</i> | 199 | 1232 | 1430 |
| Tbg972.8.7000 | <i>T. brucei</i> | 151 | 1    | 151  |
| Tbg972.8.7010 | <i>T. brucei</i> | 44  | 105  | 148  |
| Tbg972.8.7020 | <i>T. brucei</i> | 43  | 1    | 43   |
| Tbg972.8.7020 | <i>T. brucei</i> | 149 | 91   | 239  |
| Tbg972.8.7020 | <i>T. brucei</i> | 153 | 265  | 417  |
| Tbg972.8.7020 | <i>T. brucei</i> | 46  | 790  | 835  |
| Tbg972.8.7020 | <i>T. brucei</i> | 54  | 874  | 927  |
| Tbg972.8.7020 | <i>T. brucei</i> | 45  | 963  | 1007 |
| Tbg972.8.7020 | <i>T. brucei</i> | 53  | 1126 | 1178 |
| Tbg972.8.7020 | <i>T. brucei</i> | 62  | 1326 | 1387 |
| Tbg972.8.7020 | <i>T. brucei</i> | 84  | 1566 | 1649 |
| Tbg972.8.7030 | <i>T. brucei</i> | 210 | 357  | 566  |
| Tbg972.8.7040 | <i>T. brucei</i> | 66  | 56   | 121  |
| Tbg972.8.7050 | <i>T. brucei</i> | 60  | 190  | 249  |
| Tbg972.8.7060 | <i>T. brucei</i> | 52  | 311  | 362  |
| Tbg972.8.7060 | <i>T. brucei</i> | 53  | 616  | 668  |
| Tbg972.8.7060 | <i>T. brucei</i> | 53  | 616  | 668  |
| Tbg972.8.7070 | <i>T. brucei</i> | 60  | 457  | 516  |
| Tbg972.8.7070 | <i>T. brucei</i> | 69  | 649  | 717  |
| Tbg972.8.7070 | <i>T. brucei</i> | 47  | 847  | 893  |
| Tbg972.8.710  | <i>T. brucei</i> | 61  | 42   | 102  |
| Tbg972.8.7150 | <i>T. brucei</i> | 54  | 636  | 689  |
| Tbg972.8.7150 | <i>T. brucei</i> | 40  | 963  | 1002 |
| Tbg972.8.7150 | <i>T. brucei</i> | 54  | 1329 | 1382 |
| Tbg972.8.7150 | <i>T. brucei</i> | 64  | 1397 | 1460 |
| Tbg972.8.7200 | <i>T. brucei</i> | 833 | 1    | 833  |
| Tbg972.8.7230 | <i>T. brucei</i> | 43  | 74   | 116  |
| Tbg972.8.7240 | <i>T. brucei</i> | 46  | 439  | 484  |
| Tbg972.8.7260 | <i>T. brucei</i> | 44  | 17   | 60   |
| Tbg972.8.7260 | <i>T. brucei</i> | 40  | 113  | 152  |
| Tbg972.8.7260 | <i>T. brucei</i> | 40  | 113  | 152  |
| Tbg972.8.7280 | <i>T. brucei</i> | 93  | 60   | 152  |
| Tbg972.8.7280 | <i>T. brucei</i> | 123 | 264  | 386  |
| Tbg972.8.7280 | <i>T. brucei</i> | 309 | 521  | 829  |

|               |                  |     |      |      |
|---------------|------------------|-----|------|------|
| Tbg972.8.7280 | <i>T. brucei</i> | 139 | 896  | 1034 |
| Tbg972.8.7280 | <i>T. brucei</i> | 65  | 1072 | 1136 |
| Tbg972.8.7280 | <i>T. brucei</i> | 53  | 1157 | 1209 |
| Tbg972.8.7290 | <i>T. brucei</i> | 45  | 20   | 64   |
| Tbg972.8.7290 | <i>T. brucei</i> | 118 | 199  | 316  |
| Tbg972.8.730  | <i>T. brucei</i> | 115 | 1    | 115  |
| Tbg972.8.730  | <i>T. brucei</i> | 194 | 118  | 311  |
| Tbg972.8.7300 | <i>T. brucei</i> | 71  | 53   | 123  |
| Tbg972.8.7300 | <i>T. brucei</i> | 63  | 219  | 281  |
| Tbg972.8.7300 | <i>T. brucei</i> | 48  | 288  | 335  |
| Tbg972.8.7300 | <i>T. brucei</i> | 87  | 661  | 747  |
| Tbg972.8.7300 | <i>T. brucei</i> | 232 | 837  | 1068 |
| Tbg972.8.7300 | <i>T. brucei</i> | 169 | 1124 | 1292 |
| Tbg972.8.7300 | <i>T. brucei</i> | 156 | 1366 | 1521 |
| Tbg972.8.7310 | <i>T. brucei</i> | 86  | 791  | 876  |
| Tbg972.8.7320 | <i>T. brucei</i> | 44  | 728  | 771  |
| Tbg972.8.7320 | <i>T. brucei</i> | 69  | 1340 | 1408 |
| Tbg972.8.7320 | <i>T. brucei</i> | 40  | 2142 | 2181 |
| Tbg972.8.7330 | <i>T. brucei</i> | 52  | 66   | 117  |
| Tbg972.8.7340 | <i>T. brucei</i> | 55  | 277  | 331  |
| Tbg972.8.7360 | <i>T. brucei</i> | 45  | 92   | 136  |
| Tbg972.8.740  | <i>T. brucei</i> | 40  | 1    | 40   |
| Tbg972.8.740  | <i>T. brucei</i> | 42  | 409  | 450  |
| Tbg972.8.740  | <i>T. brucei</i> | 42  | 409  | 450  |
| Tbg972.8.7440 | <i>T. brucei</i> | 56  | 56   | 111  |
| Tbg972.8.7440 | <i>T. brucei</i> | 63  | 141  | 203  |
| Tbg972.8.7450 | <i>T. brucei</i> | 152 | 32   | 183  |
| Tbg972.8.7460 | <i>T. brucei</i> | 53  | 105  | 157  |
| Tbg972.8.7460 | <i>T. brucei</i> | 61  | 1063 | 1123 |
| Tbg972.8.7460 | <i>T. brucei</i> | 61  | 1063 | 1123 |
| Tbg972.8.7480 | <i>T. brucei</i> | 90  | 1    | 90   |
| Tbg972.8.7480 | <i>T. brucei</i> | 54  | 104  | 157  |
| Tbg972.8.7480 | <i>T. brucei</i> | 51  | 204  | 254  |
| Tbg972.8.7480 | <i>T. brucei</i> | 62  | 581  | 642  |
| Tbg972.8.7490 | <i>T. brucei</i> | 88  | 1    | 88   |
| Tbg972.8.750  | <i>T. brucei</i> | 402 | 66   | 467  |
| Tbg972.8.7510 | <i>T. brucei</i> | 82  | 31   | 112  |
| Tbg972.8.7510 | <i>T. brucei</i> | 155 | 219  | 373  |
| Tbg972.8.7520 | <i>T. brucei</i> | 42  | 50   | 91   |
| Tbg972.8.7530 | <i>T. brucei</i> | 46  | 33   | 78   |
| Tbg972.8.7540 | <i>T. brucei</i> | 55  | 1    | 55   |
| Tbg972.8.7560 | <i>T. brucei</i> | 854 | 1    | 854  |
| Tbg972.8.7570 | <i>T. brucei</i> | 48  | 111  | 158  |
| Tbg972.8.760  | <i>T. brucei</i> | 46  | 13   | 58   |
| Tbg972.8.760  | <i>T. brucei</i> | 48  | 115  | 162  |
| Tbg972.8.7620 | <i>T. brucei</i> | 57  | 1    | 57   |
| Tbg972.8.7630 | <i>T. brucei</i> | 337 | 1    | 337  |

|               |                  |     |      |      |
|---------------|------------------|-----|------|------|
| Tbg972.8.7650 | <i>T. brucei</i> | 54  | 16   | 69   |
| Tbg972.8.7660 | <i>T. brucei</i> | 43  | 142  | 184  |
| Tbg972.8.770  | <i>T. brucei</i> | 98  | 86   | 183  |
| Tbg972.8.7700 | <i>T. brucei</i> | 60  | 1    | 60   |
| Tbg972.8.7700 | <i>T. brucei</i> | 62  | 242  | 303  |
| Tbg972.8.7710 | <i>T. brucei</i> | 85  | 1    | 85   |
| Tbg972.8.7710 | <i>T. brucei</i> | 75  | 157  | 231  |
| Tbg972.8.7710 | <i>T. brucei</i> | 47  | 329  | 375  |
| Tbg972.8.7710 | <i>T. brucei</i> | 50  | 455  | 504  |
| Tbg972.8.7720 | <i>T. brucei</i> | 120 | 1    | 120  |
| Tbg972.8.7720 | <i>T. brucei</i> | 132 | 133  | 264  |
| Tbg972.8.7720 | <i>T. brucei</i> | 41  | 308  | 348  |
| Tbg972.8.7720 | <i>T. brucei</i> | 67  | 370  | 436  |
| Tbg972.8.7720 | <i>T. brucei</i> | 92  | 449  | 540  |
| Tbg972.8.7720 | <i>T. brucei</i> | 68  | 553  | 620  |
| Tbg972.8.7730 | <i>T. brucei</i> | 77  | 409  | 485  |
| Tbg972.8.7730 | <i>T. brucei</i> | 40  | 622  | 661  |
| Tbg972.8.7730 | <i>T. brucei</i> | 62  | 722  | 783  |
| Tbg972.8.7730 | <i>T. brucei</i> | 41  | 929  | 969  |
| Tbg972.8.7730 | <i>T. brucei</i> | 56  | 1150 | 1205 |
| Tbg972.8.7730 | <i>T. brucei</i> | 65  | 1224 | 1288 |
| Tbg972.8.7760 | <i>T. brucei</i> | 56  | 31   | 86   |
| Tbg972.8.7760 | <i>T. brucei</i> | 93  | 101  | 193  |
| Tbg972.8.7770 | <i>T. brucei</i> | 67  | 34   | 100  |
| Tbg972.8.7780 | <i>T. brucei</i> | 57  | 1    | 57   |
| Tbg972.8.7780 | <i>T. brucei</i> | 623 | 177  | 799  |
| Tbg972.8.7800 | <i>T. brucei</i> | 258 | 1    | 258  |
| Tbg972.8.7800 | <i>T. brucei</i> | 41  | 316  | 356  |
| Tbg972.8.7800 | <i>T. brucei</i> | 121 | 391  | 511  |
| Tbg972.8.7820 | <i>T. brucei</i> | 49  | 399  | 447  |
| Tbg972.8.7840 | <i>T. brucei</i> | 41  | 328  | 368  |
| Tbg972.8.7840 | <i>T. brucei</i> | 52  | 460  | 511  |
| Tbg972.8.7840 | <i>T. brucei</i> | 52  | 460  | 511  |
| Tbg972.8.7850 | <i>T. brucei</i> | 92  | 33   | 124  |
| Tbg972.8.7850 | <i>T. brucei</i> | 239 | 387  | 625  |
| Tbg972.8.7870 | <i>T. brucei</i> | 76  | 1192 | 1267 |
| Tbg972.8.7890 | <i>T. brucei</i> | 42  | 1    | 42   |
| Tbg972.8.790  | <i>T. brucei</i> | 64  | 430  | 493  |
| Tbg972.8.790  | <i>T. brucei</i> | 64  | 499  | 562  |
| Tbg972.8.790  | <i>T. brucei</i> | 64  | 499  | 562  |
| Tbg972.8.7900 | <i>T. brucei</i> | 42  | 1    | 42   |
| Tbg972.8.7910 | <i>T. brucei</i> | 42  | 1    | 42   |
| Tbg972.8.7920 | <i>T. brucei</i> | 40  | 1    | 40   |
| Tbg972.8.7930 | <i>T. brucei</i> | 100 | 25   | 124  |
| Tbg972.8.7940 | <i>T. brucei</i> | 73  | 53   | 125  |
| Tbg972.8.7950 | <i>T. brucei</i> | 83  | 91   | 173  |
| Tbg972.8.7960 | <i>T. brucei</i> | 84  | 109  | 192  |



|               |                  |     |      |      |
|---------------|------------------|-----|------|------|
| Tbg972.8.7990 | <i>T. brucei</i> | 52  | 1    | 52   |
| Tbg972.8.80   | <i>T. brucei</i> | 102 | 150  | 251  |
| Tbg972.8.800  | <i>T. brucei</i> | 57  | 50   | 106  |
| Tbg972.8.800  | <i>T. brucei</i> | 196 | 139  | 334  |
| Tbg972.8.800  | <i>T. brucei</i> | 43  | 776  | 818  |
| Tbg972.8.8040 | <i>T. brucei</i> | 139 | 1    | 139  |
| Tbg972.8.8060 | <i>T. brucei</i> | 45  | 172  | 216  |
| Tbg972.8.8060 | <i>T. brucei</i> | 213 | 762  | 974  |
| Tbg972.8.8060 | <i>T. brucei</i> | 72  | 995  | 1066 |
| Tbg972.8.8090 | <i>T. brucei</i> | 63  | 81   | 143  |
| Tbg972.8.8090 | <i>T. brucei</i> | 135 | 226  | 360  |
| Tbg972.8.8090 | <i>T. brucei</i> | 170 | 704  | 873  |
| Tbg972.8.810  | <i>T. brucei</i> | 159 | 63   | 221  |
| Tbg972.8.810  | <i>T. brucei</i> | 266 | 297  | 562  |
| Tbg972.8.8130 | <i>T. brucei</i> | 51  | 121  | 171  |
| Tbg972.8.8130 | <i>T. brucei</i> | 41  | 433  | 473  |
| Tbg972.8.8130 | <i>T. brucei</i> | 69  | 580  | 648  |
| Tbg972.8.8130 | <i>T. brucei</i> | 64  | 759  | 822  |
| Tbg972.8.8140 | <i>T. brucei</i> | 45  | 77   | 121  |
| Tbg972.8.8150 | <i>T. brucei</i> | 89  | 1    | 89   |
| Tbg972.8.8150 | <i>T. brucei</i> | 632 | 126  | 757  |
| Tbg972.8.8150 | <i>T. brucei</i> | 40  | 780  | 819  |
| Tbg972.8.8150 | <i>T. brucei</i> | 88  | 936  | 1023 |
| Tbg972.8.8160 | <i>T. brucei</i> | 130 | 1    | 130  |
| Tbg972.8.8160 | <i>T. brucei</i> | 121 | 165  | 285  |
| Tbg972.8.8160 | <i>T. brucei</i> | 121 | 165  | 285  |
| Tbg972.8.8170 | <i>T. brucei</i> | 183 | 25   | 207  |
| Tbg972.8.8170 | <i>T. brucei</i> | 134 | 312  | 445  |
| Tbg972.8.8180 | <i>T. brucei</i> | 69  | 1    | 69   |
| Tbg972.8.8180 | <i>T. brucei</i> | 113 | 90   | 202  |
| Tbg972.8.8180 | <i>T. brucei</i> | 212 | 226  | 437  |
| Tbg972.8.8180 | <i>T. brucei</i> | 257 | 455  | 711  |
| Tbg972.8.8180 | <i>T. brucei</i> | 309 | 716  | 1024 |
| Tbg972.8.8180 | <i>T. brucei</i> | 109 | 1064 | 1172 |
| Tbg972.8.820  | <i>T. brucei</i> | 62  | 55   | 116  |
| Tbg972.8.820  | <i>T. brucei</i> | 62  | 132  | 193  |
| Tbg972.8.820  | <i>T. brucei</i> | 46  | 225  | 270  |
| Tbg972.8.820  | <i>T. brucei</i> | 113 | 289  | 401  |
| Tbg972.8.820  | <i>T. brucei</i> | 80  | 473  | 552  |
| Tbg972.8.820  | <i>T. brucei</i> | 64  | 600  | 663  |
| Tbg972.8.820  | <i>T. brucei</i> | 308 | 939  | 1246 |
| Tbg972.8.8200 | <i>T. brucei</i> | 88  | 1    | 88   |
| Tbg972.8.8200 | <i>T. brucei</i> | 42  | 157  | 198  |
| Tbg972.8.8200 | <i>T. brucei</i> | 43  | 200  | 242  |
| Tbg972.8.8200 | <i>T. brucei</i> | 46  | 421  | 466  |
| Tbg972.8.8200 | <i>T. brucei</i> | 165 | 571  | 735  |
| Tbg972.8.8200 | <i>T. brucei</i> | 50  | 793  | 842  |

|               |                  |     |      |      |
|---------------|------------------|-----|------|------|
| Tbg972.8.8220 | <i>T. brucei</i> | 197 | 1    | 197  |
| Tbg972.8.8220 | <i>T. brucei</i> | 63  | 209  | 271  |
| Tbg972.8.8220 | <i>T. brucei</i> | 67  | 479  | 545  |
| Tbg972.8.8220 | <i>T. brucei</i> | 47  | 566  | 612  |
| Tbg972.8.8220 | <i>T. brucei</i> | 95  | 648  | 742  |
| Tbg972.8.8220 | <i>T. brucei</i> | 51  | 761  | 811  |
| Tbg972.8.8220 | <i>T. brucei</i> | 143 | 816  | 958  |
| Tbg972.8.8270 | <i>T. brucei</i> | 45  | 452  | 496  |
| Tbg972.8.8270 | <i>T. brucei</i> | 284 | 539  | 822  |
| Tbg972.8.8270 | <i>T. brucei</i> | 274 | 997  | 1270 |
| Tbg972.8.8270 | <i>T. brucei</i> | 303 | 1291 | 1593 |
| Tbg972.8.8280 | <i>T. brucei</i> | 49  | 1    | 49   |
| Tbg972.8.8280 | <i>T. brucei</i> | 64  | 100  | 163  |
| Tbg972.8.8280 | <i>T. brucei</i> | 53  | 224  | 276  |
| Tbg972.8.8290 | <i>T. brucei</i> | 169 | 1    | 169  |
| Tbg972.8.8290 | <i>T. brucei</i> | 111 | 265  | 375  |
| Tbg972.8.8290 | <i>T. brucei</i> | 75  | 386  | 460  |
| Tbg972.8.8310 | <i>T. brucei</i> | 48  | 22   | 69   |
| Tbg972.8.8310 | <i>T. brucei</i> | 54  | 360  | 413  |
| Tbg972.8.8310 | <i>T. brucei</i> | 65  | 1693 | 1757 |
| Tbg972.8.8310 | <i>T. brucei</i> | 49  | 2147 | 2195 |
| Tbg972.8.8310 | <i>T. brucei</i> | 50  | 2238 | 2287 |
| Tbg972.8.8310 | <i>T. brucei</i> | 40  | 2945 | 2984 |
| Tbg972.8.8310 | <i>T. brucei</i> | 87  | 4209 | 4295 |
| Tbg972.8.8310 | <i>T. brucei</i> | 46  | 4317 | 4362 |
| Tbg972.8.8310 | <i>T. brucei</i> | 41  | 4660 | 4700 |
| Tbg972.8.8310 | <i>T. brucei</i> | 77  | 4818 | 4894 |
| Tbg972.8.8320 | <i>T. brucei</i> | 59  | 312  | 370  |
| Tbg972.8.8320 | <i>T. brucei</i> | 56  | 487  | 542  |
| Tbg972.8.8330 | <i>T. brucei</i> | 254 | 452  | 705  |
| Tbg972.8.8380 | <i>T. brucei</i> | 229 | 30   | 258  |
| Tbg972.8.8380 | <i>T. brucei</i> | 468 | 272  | 739  |
| Tbg972.8.8390 | <i>T. brucei</i> | 78  | 128  | 205  |
| Tbg972.8.8390 | <i>T. brucei</i> | 257 | 247  | 503  |
| Tbg972.8.840  | <i>T. brucei</i> | 73  | 242  | 314  |
| Tbg972.8.840  | <i>T. brucei</i> | 72  | 427  | 498  |
| Tbg972.8.840  | <i>T. brucei</i> | 116 | 514  | 629  |
| Tbg972.8.840  | <i>T. brucei</i> | 157 | 905  | 1061 |
| Tbg972.8.8420 | <i>T. brucei</i> | 376 | 213  | 588  |
| Tbg972.8.8430 | <i>T. brucei</i> | 118 | 26   | 143  |
| Tbg972.8.8430 | <i>T. brucei</i> | 58  | 177  | 234  |
| Tbg972.8.8430 | <i>T. brucei</i> | 58  | 177  | 234  |
| Tbg972.8.8440 | <i>T. brucei</i> | 50  | 79   | 128  |
| Tbg972.8.8440 | <i>T. brucei</i> | 143 | 143  | 285  |
| Tbg972.8.8440 | <i>T. brucei</i> | 81  | 555  | 635  |
| Tbg972.8.8460 | <i>T. brucei</i> | 60  | 67   | 126  |
| Tbg972.8.8460 | <i>T. brucei</i> | 339 | 294  | 632  |

|               |                  |     |      |      |
|---------------|------------------|-----|------|------|
| Tbg972.8.8470 | <i>T. brucei</i> | 40  | 143  | 182  |
| Tbg972.8.8480 | <i>T. brucei</i> | 424 | 1    | 424  |
| Tbg972.8.8480 | <i>T. brucei</i> | 111 | 465  | 575  |
| Tbg972.8.8490 | <i>T. brucei</i> | 56  | 1    | 56   |
| Tbg972.8.850  | <i>T. brucei</i> | 348 | 1    | 348  |
| Tbg972.8.850  | <i>T. brucei</i> | 135 | 430  | 564  |
| Tbg972.8.8500 | <i>T. brucei</i> | 75  | 1    | 75   |
| Tbg972.8.8500 | <i>T. brucei</i> | 49  | 338  | 386  |
| Tbg972.8.8510 | <i>T. brucei</i> | 169 | 22   | 190  |
| Tbg972.8.8510 | <i>T. brucei</i> | 65  | 451  | 515  |
| Tbg972.8.8520 | <i>T. brucei</i> | 79  | 107  | 185  |
| Tbg972.8.8520 | <i>T. brucei</i> | 59  | 314  | 372  |
| Tbg972.8.8520 | <i>T. brucei</i> | 59  | 314  | 372  |
| Tbg972.8.8540 | <i>T. brucei</i> | 54  | 1    | 54   |
| Tbg972.8.8550 | <i>T. brucei</i> | 43  | 1    | 43   |
| Tbg972.8.8580 | <i>T. brucei</i> | 43  | 1    | 43   |
| Tbg972.8.860  | <i>T. brucei</i> | 47  | 1    | 47   |
| Tbg972.8.8610 | <i>T. brucei</i> | 80  | 1    | 80   |
| Tbg972.8.8610 | <i>T. brucei</i> | 53  | 131  | 183  |
| Tbg972.8.8610 | <i>T. brucei</i> | 129 | 308  | 436  |
| Tbg972.8.8610 | <i>T. brucei</i> | 45  | 845  | 889  |
| Tbg972.8.8620 | <i>T. brucei</i> | 43  | 77   | 119  |
| Tbg972.8.8620 | <i>T. brucei</i> | 41  | 209  | 249  |
| Tbg972.8.8620 | <i>T. brucei</i> | 41  | 209  | 249  |
| Tbg972.8.8640 | <i>T. brucei</i> | 48  | 1    | 48   |
| Tbg972.8.8650 | <i>T. brucei</i> | 45  | 159  | 203  |
| Tbg972.8.8660 | <i>T. brucei</i> | 89  | 1    | 89   |
| Tbg972.8.8660 | <i>T. brucei</i> | 48  | 103  | 150  |
| Tbg972.8.8660 | <i>T. brucei</i> | 40  | 166  | 205  |
| Tbg972.8.8660 | <i>T. brucei</i> | 76  | 317  | 392  |
| Tbg972.8.8670 | <i>T. brucei</i> | 175 | 631  | 805  |
| Tbg972.8.8690 | <i>T. brucei</i> | 266 | 1    | 266  |
| Tbg972.8.8690 | <i>T. brucei</i> | 72  | 412  | 483  |
| Tbg972.8.8690 | <i>T. brucei</i> | 85  | 557  | 641  |
| Tbg972.8.8690 | <i>T. brucei</i> | 51  | 718  | 768  |
| Tbg972.8.870  | <i>T. brucei</i> | 189 | 1    | 189  |
| Tbg972.8.880  | <i>T. brucei</i> | 51  | 1    | 51   |
| Tbg972.8.880  | <i>T. brucei</i> | 72  | 73   | 144  |
| Tbg972.8.880  | <i>T. brucei</i> | 72  | 73   | 144  |
| Tbg972.8.885  | <i>T. brucei</i> | 51  | 1    | 51   |
| Tbg972.8.885  | <i>T. brucei</i> | 72  | 73   | 144  |
| Tbg972.8.885  | <i>T. brucei</i> | 72  | 73   | 144  |
| Tbg972.8.890  | <i>T. brucei</i> | 53  | 72   | 124  |
| Tbg972.8.890  | <i>T. brucei</i> | 101 | 188  | 288  |
| Tbg972.8.90   | <i>T. brucei</i> | 104 | 47   | 150  |
| Tbg972.8.900  | <i>T. brucei</i> | 49  | 2822 | 2870 |
| Tbg972.8.900  | <i>T. brucei</i> | 43  | 3738 | 3780 |

|               |                  |     |      |      |
|---------------|------------------|-----|------|------|
| Tbg972.8.900  | <i>T. brucei</i> | 50  | 3876 | 3925 |
| Tbg972.8.900  | <i>T. brucei</i> | 43  | 4172 | 4214 |
| Tbg972.8.920  | <i>T. brucei</i> | 61  | 87   | 147  |
| Tbg972.8.960  | <i>T. brucei</i> | 69  | 1    | 69   |
| Tbg972.9.100  | <i>T. brucei</i> | 68  | 80   | 147  |
| Tbg972.9.100  | <i>T. brucei</i> | 109 | 175  | 283  |
| Tbg972.9.100  | <i>T. brucei</i> | 66  | 304  | 369  |
| Tbg972.9.1020 | <i>T. brucei</i> | 105 | 1    | 105  |
| Tbg972.9.1030 | <i>T. brucei</i> | 101 | 1    | 101  |
| Tbg972.9.1040 | <i>T. brucei</i> | 146 | 31   | 176  |
| Tbg972.9.1050 | <i>T. brucei</i> | 85  | 41   | 125  |
| Tbg972.9.1070 | <i>T. brucei</i> | 56  | 71   | 126  |
| Tbg972.9.1070 | <i>T. brucei</i> | 62  | 387  | 448  |
| Tbg972.9.1070 | <i>T. brucei</i> | 109 | 653  | 761  |
| Tbg972.9.1080 | <i>T. brucei</i> | 61  | 71   | 131  |
| Tbg972.9.1080 | <i>T. brucei</i> | 59  | 388  | 446  |
| Tbg972.9.1080 | <i>T. brucei</i> | 59  | 388  | 446  |
| Tbg972.9.1100 | <i>T. brucei</i> | 161 | 1    | 161  |
| Tbg972.9.1100 | <i>T. brucei</i> | 52  | 447  | 498  |
| Tbg972.9.1100 | <i>T. brucei</i> | 47  | 700  | 746  |
| Tbg972.9.1100 | <i>T. brucei</i> | 48  | 804  | 851  |
| Tbg972.9.1100 | <i>T. brucei</i> | 102 | 941  | 1042 |
| Tbg972.9.1130 | <i>T. brucei</i> | 52  | 936  | 987  |
| Tbg972.9.1160 | <i>T. brucei</i> | 77  | 44   | 120  |
| Tbg972.9.1160 | <i>T. brucei</i> | 69  | 137  | 205  |
| Tbg972.9.1160 | <i>T. brucei</i> | 86  | 484  | 569  |
| Tbg972.9.1170 | <i>T. brucei</i> | 71  | 1    | 71   |
| Tbg972.9.1170 | <i>T. brucei</i> | 75  | 388  | 462  |
| Tbg972.9.1170 | <i>T. brucei</i> | 116 | 881  | 996  |
| Tbg972.9.1170 | <i>T. brucei</i> | 51  | 1057 | 1107 |
| Tbg972.9.1170 | <i>T. brucei</i> | 154 | 1185 | 1338 |
| Tbg972.9.1170 | <i>T. brucei</i> | 55  | 1371 | 1425 |
| Tbg972.9.1170 | <i>T. brucei</i> | 148 | 1521 | 1668 |
| Tbg972.9.1170 | <i>T. brucei</i> | 49  | 1805 | 1853 |
| Tbg972.9.1170 | <i>T. brucei</i> | 45  | 1875 | 1919 |
| Tbg972.9.1180 | <i>T. brucei</i> | 53  | 21   | 73   |
| Tbg972.9.1180 | <i>T. brucei</i> | 55  | 113  | 167  |
| Tbg972.9.1180 | <i>T. brucei</i> | 82  | 190  | 271  |
| Tbg972.9.1180 | <i>T. brucei</i> | 57  | 508  | 564  |
| Tbg972.9.1190 | <i>T. brucei</i> | 41  | 119  | 159  |
| Tbg972.9.1200 | <i>T. brucei</i> | 233 | 1    | 233  |
| Tbg972.9.1200 | <i>T. brucei</i> | 193 | 291  | 483  |
| Tbg972.9.1220 | <i>T. brucei</i> | 585 | 13   | 597  |
| Tbg972.9.1220 | <i>T. brucei</i> | 96  | 611  | 706  |
| Tbg972.9.1220 | <i>T. brucei</i> | 105 | 835  | 939  |
| Tbg972.9.1220 | <i>T. brucei</i> | 125 | 1025 | 1149 |
| Tbg972.9.1220 | <i>T. brucei</i> | 50  | 1236 | 1285 |

|               |                  |     |      |      |
|---------------|------------------|-----|------|------|
| Tbg972.9.1230 | <i>T. brucei</i> | 354 | 138  | 491  |
| Tbg972.9.1240 | <i>T. brucei</i> | 54  | 1    | 54   |
| Tbg972.9.1240 | <i>T. brucei</i> | 90  | 92   | 181  |
| Tbg972.9.1240 | <i>T. brucei</i> | 90  | 92   | 181  |
| Tbg972.9.1270 | <i>T. brucei</i> | 118 | 222  | 339  |
| Tbg972.9.1280 | <i>T. brucei</i> | 86  | 230  | 315  |
| Tbg972.9.130  | <i>T. brucei</i> | 71  | 1    | 71   |
| Tbg972.9.130  | <i>T. brucei</i> | 96  | 327  | 422  |
| Tbg972.9.130  | <i>T. brucei</i> | 115 | 513  | 627  |
| Tbg972.9.1300 | <i>T. brucei</i> | 124 | 222  | 345  |
| Tbg972.9.1330 | <i>T. brucei</i> | 134 | 230  | 363  |
| Tbg972.9.1360 | <i>T. brucei</i> | 660 | 258  | 917  |
| Tbg972.9.1380 | <i>T. brucei</i> | 237 | 235  | 471  |
| Tbg972.9.140  | <i>T. brucei</i> | 55  | 63   | 117  |
| Tbg972.9.140  | <i>T. brucei</i> | 48  | 224  | 271  |
| Tbg972.9.140  | <i>T. brucei</i> | 48  | 224  | 271  |
| Tbg972.9.1410 | <i>T. brucei</i> | 42  | 1415 | 1456 |
| Tbg972.9.1430 | <i>T. brucei</i> | 45  | 1    | 45   |
| Tbg972.9.1430 | <i>T. brucei</i> | 41  | 100  | 140  |
| Tbg972.9.1450 | <i>T. brucei</i> | 49  | 1    | 49   |
| Tbg972.9.1450 | <i>T. brucei</i> | 128 | 272  | 399  |
| Tbg972.9.1450 | <i>T. brucei</i> | 128 | 272  | 399  |
| Tbg972.9.1460 | <i>T. brucei</i> | 48  | 122  | 169  |
| Tbg972.9.1470 | <i>T. brucei</i> | 44  | 1    | 44   |
| Tbg972.9.1470 | <i>T. brucei</i> | 48  | 122  | 169  |
| Tbg972.9.1470 | <i>T. brucei</i> | 48  | 122  | 169  |
| Tbg972.9.1490 | <i>T. brucei</i> | 49  | 182  | 230  |
| Tbg972.9.1520 | <i>T. brucei</i> | 52  | 139  | 190  |
| Tbg972.9.1520 | <i>T. brucei</i> | 166 | 211  | 376  |
| Tbg972.9.1570 | <i>T. brucei</i> | 126 | 1    | 126  |
| Tbg972.9.1570 | <i>T. brucei</i> | 81  | 329  | 409  |
| Tbg972.9.1570 | <i>T. brucei</i> | 92  | 475  | 566  |
| Tbg972.9.170  | <i>T. brucei</i> | 40  | 117  | 156  |
| Tbg972.9.1710 | <i>T. brucei</i> | 55  | 1    | 55   |
| Tbg972.9.1710 | <i>T. brucei</i> | 177 | 77   | 253  |
| Tbg972.9.1720 | <i>T. brucei</i> | 75  | 137  | 211  |
| Tbg972.9.1750 | <i>T. brucei</i> | 59  | 338  | 396  |
| Tbg972.9.1750 | <i>T. brucei</i> | 45  | 582  | 626  |
| Tbg972.9.1750 | <i>T. brucei</i> | 45  | 582  | 626  |
| Tbg972.9.1760 | <i>T. brucei</i> | 60  | 89   | 148  |
| Tbg972.9.1770 | <i>T. brucei</i> | 73  | 111  | 183  |
| Tbg972.9.1780 | <i>T. brucei</i> | 147 | 37   | 183  |
| Tbg972.9.180  | <i>T. brucei</i> | 73  | 314  | 386  |
| Tbg972.9.1800 | <i>T. brucei</i> | 54  | 64   | 117  |
| Tbg972.9.1820 | <i>T. brucei</i> | 59  | 1    | 59   |
| Tbg972.9.1820 | <i>T. brucei</i> | 81  | 186  | 266  |
| Tbg972.9.1830 | <i>T. brucei</i> | 171 | 35   | 205  |

|               |                  |     |      |      |
|---------------|------------------|-----|------|------|
| Tbg972.9.1830 | <i>T. brucei</i> | 54  | 228  | 281  |
| Tbg972.9.1830 | <i>T. brucei</i> | 275 | 305  | 579  |
| Tbg972.9.1870 | <i>T. brucei</i> | 46  | 467  | 512  |
| Tbg972.9.1880 | <i>T. brucei</i> | 85  | 114  | 198  |
| Tbg972.9.1890 | <i>T. brucei</i> | 99  | 64   | 162  |
| Tbg972.9.1890 | <i>T. brucei</i> | 47  | 312  | 358  |
| Tbg972.9.1890 | <i>T. brucei</i> | 145 | 454  | 598  |
| Tbg972.9.190  | <i>T. brucei</i> | 47  | 1    | 47   |
| Tbg972.9.190  | <i>T. brucei</i> | 48  | 75   | 122  |
| Tbg972.9.190  | <i>T. brucei</i> | 48  | 75   | 122  |
| Tbg972.9.1900 | <i>T. brucei</i> | 41  | 402  | 442  |
| Tbg972.9.1910 | <i>T. brucei</i> | 208 | 122  | 329  |
| Tbg972.9.1910 | <i>T. brucei</i> | 53  | 341  | 393  |
| Tbg972.9.1910 | <i>T. brucei</i> | 144 | 445  | 588  |
| Tbg972.9.1910 | <i>T. brucei</i> | 153 | 634  | 786  |
| Tbg972.9.1910 | <i>T. brucei</i> | 212 | 884  | 1095 |
| Tbg972.9.1920 | <i>T. brucei</i> | 77  | 1    | 77   |
| Tbg972.9.2000 | <i>T. brucei</i> | 116 | 371  | 486  |
| Tbg972.9.2000 | <i>T. brucei</i> | 49  | 502  | 550  |
| Tbg972.9.2000 | <i>T. brucei</i> | 49  | 502  | 550  |
| Tbg972.9.2020 | <i>T. brucei</i> | 43  | 138  | 180  |
| Tbg972.9.2030 | <i>T. brucei</i> | 42  | 44   | 85   |
| Tbg972.9.2060 | <i>T. brucei</i> | 77  | 1    | 77   |
| Tbg972.9.2060 | <i>T. brucei</i> | 98  | 138  | 235  |
| Tbg972.9.2060 | <i>T. brucei</i> | 115 | 421  | 535  |
| Tbg972.9.2060 | <i>T. brucei</i> | 46  | 615  | 660  |
| Tbg972.9.2080 | <i>T. brucei</i> | 41  | 1    | 41   |
| Tbg972.9.2090 | <i>T. brucei</i> | 312 | 1    | 312  |
| Tbg972.9.2100 | <i>T. brucei</i> | 43  | 85   | 127  |
| Tbg972.9.2110 | <i>T. brucei</i> | 48  | 504  | 551  |
| Tbg972.9.2120 | <i>T. brucei</i> | 46  | 57   | 102  |
| Tbg972.9.2130 | <i>T. brucei</i> | 294 | 1    | 294  |
| Tbg972.9.2130 | <i>T. brucei</i> | 83  | 728  | 810  |
| Tbg972.9.2130 | <i>T. brucei</i> | 155 | 881  | 1035 |
| Tbg972.9.2130 | <i>T. brucei</i> | 87  | 1049 | 1135 |
| Tbg972.9.2130 | <i>T. brucei</i> | 156 | 1159 | 1314 |
| Tbg972.9.220  | <i>T. brucei</i> | 40  | 117  | 156  |
| Tbg972.9.2200 | <i>T. brucei</i> | 53  | 1    | 53   |
| Tbg972.9.2230 | <i>T. brucei</i> | 61  | 52   | 112  |
| Tbg972.9.2230 | <i>T. brucei</i> | 102 | 148  | 249  |
| Tbg972.9.2240 | <i>T. brucei</i> | 72  | 161  | 232  |
| Tbg972.9.2250 | <i>T. brucei</i> | 70  | 1    | 70   |
| Tbg972.9.2250 | <i>T. brucei</i> | 100 | 84   | 183  |
| Tbg972.9.2250 | <i>T. brucei</i> | 61  | 246  | 306  |
| Tbg972.9.2250 | <i>T. brucei</i> | 50  | 458  | 507  |
| Tbg972.9.2290 | <i>T. brucei</i> | 82  | 232  | 313  |
| Tbg972.9.2290 | <i>T. brucei</i> | 70  | 374  | 443  |

|               |                  |     |      |      |
|---------------|------------------|-----|------|------|
| Tbg972.9.230  | <i>T. brucei</i> | 73  | 314  | 386  |
| Tbg972.9.2310 | <i>T. brucei</i> | 59  | 1    | 59   |
| Tbg972.9.2310 | <i>T. brucei</i> | 48  | 111  | 158  |
| Tbg972.9.2310 | <i>T. brucei</i> | 84  | 332  | 415  |
| Tbg972.9.2310 | <i>T. brucei</i> | 52  | 1288 | 1339 |
| Tbg972.9.2320 | <i>T. brucei</i> | 70  | 78   | 147  |
| Tbg972.9.2320 | <i>T. brucei</i> | 62  | 282  | 343  |
| Tbg972.9.2330 | <i>T. brucei</i> | 40  | 1    | 40   |
| Tbg972.9.2330 | <i>T. brucei</i> | 153 | 263  | 415  |
| Tbg972.9.2350 | <i>T. brucei</i> | 63  | 1    | 63   |
| Tbg972.9.2360 | <i>T. brucei</i> | 166 | 73   | 238  |
| Tbg972.9.2360 | <i>T. brucei</i> | 145 | 284  | 428  |
| Tbg972.9.2360 | <i>T. brucei</i> | 208 | 467  | 674  |
| Tbg972.9.2380 | <i>T. brucei</i> | 56  | 90   | 145  |
| Tbg972.9.2380 | <i>T. brucei</i> | 156 | 623  | 778  |
| Tbg972.9.2400 | <i>T. brucei</i> | 69  | 56   | 124  |
| Tbg972.9.2400 | <i>T. brucei</i> | 83  | 131  | 213  |
| Tbg972.9.2400 | <i>T. brucei</i> | 48  | 299  | 346  |
| Tbg972.9.2400 | <i>T. brucei</i> | 80  | 349  | 428  |
| Tbg972.9.2400 | <i>T. brucei</i> | 141 | 525  | 665  |
| Tbg972.9.2400 | <i>T. brucei</i> | 40  | 711  | 750  |
| Tbg972.9.2410 | <i>T. brucei</i> | 66  | 61   | 126  |
| Tbg972.9.2420 | <i>T. brucei</i> | 166 | 331  | 496  |
| Tbg972.9.2420 | <i>T. brucei</i> | 137 | 607  | 743  |
| Tbg972.9.2430 | <i>T. brucei</i> | 172 | 1    | 172  |
| Tbg972.9.2460 | <i>T. brucei</i> | 73  | 27   | 99   |
| Tbg972.9.2460 | <i>T. brucei</i> | 51  | 284  | 334  |
| Tbg972.9.2460 | <i>T. brucei</i> | 43  | 670  | 712  |
| Tbg972.9.2460 | <i>T. brucei</i> | 47  | 1182 | 1228 |
| Tbg972.9.2460 | <i>T. brucei</i> | 58  | 1288 | 1345 |
| Tbg972.9.2470 | <i>T. brucei</i> | 141 | 1    | 141  |
| Tbg972.9.2470 | <i>T. brucei</i> | 59  | 377  | 435  |
| Tbg972.9.2470 | <i>T. brucei</i> | 44  | 524  | 567  |
| Tbg972.9.2470 | <i>T. brucei</i> | 126 | 830  | 955  |
| Tbg972.9.2480 | <i>T. brucei</i> | 81  | 124  | 204  |
| Tbg972.9.2500 | <i>T. brucei</i> | 43  | 92   | 134  |
| Tbg972.9.2510 | <i>T. brucei</i> | 139 | 12   | 150  |
| Tbg972.9.2510 | <i>T. brucei</i> | 76  | 163  | 238  |
| Tbg972.9.2510 | <i>T. brucei</i> | 76  | 275  | 350  |
| Tbg972.9.2530 | <i>T. brucei</i> | 53  | 91   | 143  |
| Tbg972.9.2580 | <i>T. brucei</i> | 46  | 1    | 46   |
| Tbg972.9.260  | <i>T. brucei</i> | 47  | 120  | 166  |
| Tbg972.9.2600 | <i>T. brucei</i> | 43  | 153  | 195  |
| Tbg972.9.2600 | <i>T. brucei</i> | 47  | 511  | 557  |
| Tbg972.9.2600 | <i>T. brucei</i> | 46  | 870  | 915  |
| Tbg972.9.2600 | <i>T. brucei</i> | 54  | 1205 | 1258 |
| Tbg972.9.2620 | <i>T. brucei</i> | 82  | 41   | 122  |

|               |                  |     |      |      |
|---------------|------------------|-----|------|------|
| Tbg972.9.2750 | <i>T. brucei</i> | 42  | 232  | 273  |
| Tbg972.9.2780 | <i>T. brucei</i> | 48  | 142  | 189  |
| Tbg972.9.2790 | <i>T. brucei</i> | 149 | 340  | 488  |
| Tbg972.9.280  | <i>T. brucei</i> | 116 | 71   | 186  |
| Tbg972.9.280  | <i>T. brucei</i> | 108 | 354  | 461  |
| Tbg972.9.2800 | <i>T. brucei</i> | 63  | 212  | 274  |
| Tbg972.9.2810 | <i>T. brucei</i> | 77  | 428  | 504  |
| Tbg972.9.2850 | <i>T. brucei</i> | 143 | 1    | 143  |
| Tbg972.9.2850 | <i>T. brucei</i> | 44  | 211  | 254  |
| Tbg972.9.2850 | <i>T. brucei</i> | 52  | 331  | 382  |
| Tbg972.9.2860 | <i>T. brucei</i> | 84  | 89   | 172  |
| Tbg972.9.2860 | <i>T. brucei</i> | 53  | 183  | 235  |
| Tbg972.9.2890 | <i>T. brucei</i> | 52  | 225  | 276  |
| Tbg972.9.2900 | <i>T. brucei</i> | 159 | 1    | 159  |
| Tbg972.9.2900 | <i>T. brucei</i> | 54  | 187  | 240  |
| Tbg972.9.2900 | <i>T. brucei</i> | 53  | 342  | 394  |
| Tbg972.9.2900 | <i>T. brucei</i> | 118 | 503  | 620  |
| Tbg972.9.2900 | <i>T. brucei</i> | 41  | 958  | 998  |
| Tbg972.9.2910 | <i>T. brucei</i> | 48  | 58   | 105  |
| Tbg972.9.2930 | <i>T. brucei</i> | 62  | 73   | 134  |
| Tbg972.9.2930 | <i>T. brucei</i> | 51  | 152  | 202  |
| Tbg972.9.2930 | <i>T. brucei</i> | 53  | 263  | 315  |
| Tbg972.9.2940 | <i>T. brucei</i> | 96  | 1    | 96   |
| Tbg972.9.2940 | <i>T. brucei</i> | 52  | 336  | 387  |
| Tbg972.9.2940 | <i>T. brucei</i> | 41  | 487  | 527  |
| Tbg972.9.2940 | <i>T. brucei</i> | 41  | 1302 | 1342 |
| Tbg972.9.2960 | <i>T. brucei</i> | 61  | 397  | 457  |
| Tbg972.9.2960 | <i>T. brucei</i> | 117 | 1105 | 1221 |
| Tbg972.9.2970 | <i>T. brucei</i> | 129 | 124  | 252  |
| Tbg972.9.2970 | <i>T. brucei</i> | 58  | 265  | 322  |
| Tbg972.9.2970 | <i>T. brucei</i> | 336 | 360  | 695  |
| Tbg972.9.2970 | <i>T. brucei</i> | 77  | 703  | 779  |
| Tbg972.9.2970 | <i>T. brucei</i> | 94  | 962  | 1055 |
| Tbg972.9.2970 | <i>T. brucei</i> | 44  | 1063 | 1106 |
| Tbg972.9.2970 | <i>T. brucei</i> | 46  | 1218 | 1263 |
| Tbg972.9.2980 | <i>T. brucei</i> | 47  | 237  | 283  |
| Tbg972.9.30   | <i>T. brucei</i> | 61  | 66   | 126  |
| Tbg972.9.3010 | <i>T. brucei</i> | 53  | 61   | 113  |
| Tbg972.9.3020 | <i>T. brucei</i> | 243 | 1699 | 1941 |
| Tbg972.9.3020 | <i>T. brucei</i> | 98  | 1955 | 2052 |
| Tbg972.9.3030 | <i>T. brucei</i> | 43  | 55   | 97   |
| Tbg972.9.3030 | <i>T. brucei</i> | 48  | 130  | 177  |
| Tbg972.9.3030 | <i>T. brucei</i> | 48  | 130  | 177  |
| Tbg972.9.3040 | <i>T. brucei</i> | 42  | 1    | 42   |
| Tbg972.9.3040 | <i>T. brucei</i> | 66  | 94   | 159  |
| Tbg972.9.3040 | <i>T. brucei</i> | 112 | 236  | 347  |
| Tbg972.9.3040 | <i>T. brucei</i> | 50  | 371  | 420  |



|               |                  |     |      |      |
|---------------|------------------|-----|------|------|
| Tbg972.9.3080 | <i>T. brucei</i> | 149 | 26   | 174  |
| Tbg972.9.3080 | <i>T. brucei</i> | 269 | 190  | 458  |
| Tbg972.9.310  | <i>T. brucei</i> | 49  | 1    | 49   |
| Tbg972.9.310  | <i>T. brucei</i> | 868 | 170  | 1037 |
| Tbg972.9.310  | <i>T. brucei</i> | 297 | 1044 | 1340 |
| Tbg972.9.310  | <i>T. brucei</i> | 160 | 1352 | 1511 |
| Tbg972.9.310  | <i>T. brucei</i> | 63  | 1543 | 1605 |
| Tbg972.9.3100 | <i>T. brucei</i> | 41  | 668  | 708  |
| Tbg972.9.3120 | <i>T. brucei</i> | 130 | 345  | 474  |
| Tbg972.9.3120 | <i>T. brucei</i> | 126 | 480  | 605  |
| Tbg972.9.3130 | <i>T. brucei</i> | 110 | 278  | 387  |
| Tbg972.9.3150 | <i>T. brucei</i> | 159 | 115  | 273  |
| Tbg972.9.3210 | <i>T. brucei</i> | 70  | 96   | 165  |
| Tbg972.9.3210 | <i>T. brucei</i> | 49  | 191  | 239  |
| Tbg972.9.3210 | <i>T. brucei</i> | 102 | 323  | 424  |
| Tbg972.9.3210 | <i>T. brucei</i> | 46  | 482  | 527  |
| Tbg972.9.3210 | <i>T. brucei</i> | 55  | 721  | 775  |
| Tbg972.9.3210 | <i>T. brucei</i> | 147 | 838  | 984  |
| Tbg972.9.3230 | <i>T. brucei</i> | 114 | 1    | 114  |
| Tbg972.9.3230 | <i>T. brucei</i> | 66  | 521  | 586  |
| Tbg972.9.3240 | <i>T. brucei</i> | 72  | 1    | 72   |
| Tbg972.9.3240 | <i>T. brucei</i> | 77  | 131  | 207  |
| Tbg972.9.3240 | <i>T. brucei</i> | 89  | 393  | 481  |
| Tbg972.9.3250 | <i>T. brucei</i> | 67  | 1    | 67   |
| Tbg972.9.3250 | <i>T. brucei</i> | 48  | 357  | 404  |
| Tbg972.9.3250 | <i>T. brucei</i> | 48  | 357  | 404  |
| Tbg972.9.3260 | <i>T. brucei</i> | 45  | 1    | 45   |
| Tbg972.9.3270 | <i>T. brucei</i> | 42  | 83   | 124  |
| Tbg972.9.3290 | <i>T. brucei</i> | 42  | 83   | 124  |
| Tbg972.9.3300 | <i>T. brucei</i> | 45  | 1    | 45   |
| Tbg972.9.3320 | <i>T. brucei</i> | 100 | 120  | 219  |
| Tbg972.9.3340 | <i>T. brucei</i> | 44  | 235  | 278  |
| Tbg972.9.3350 | <i>T. brucei</i> | 44  | 235  | 278  |
| Tbg972.9.3360 | <i>T. brucei</i> | 134 | 78   | 211  |
| Tbg972.9.3370 | <i>T. brucei</i> | 63  | 66   | 128  |
| Tbg972.9.3370 | <i>T. brucei</i> | 40  | 631  | 670  |
| Tbg972.9.3370 | <i>T. brucei</i> | 40  | 631  | 670  |
| Tbg972.9.3380 | <i>T. brucei</i> | 66  | 61   | 126  |
| Tbg972.9.3380 | <i>T. brucei</i> | 74  | 166  | 239  |
| Tbg972.9.3390 | <i>T. brucei</i> | 54  | 392  | 445  |
| Tbg972.9.3410 | <i>T. brucei</i> | 72  | 146  | 217  |
| Tbg972.9.3410 | <i>T. brucei</i> | 41  | 346  | 386  |
| Tbg972.9.3410 | <i>T. brucei</i> | 41  | 346  | 386  |
| Tbg972.9.3420 | <i>T. brucei</i> | 103 | 87   | 189  |
| Tbg972.9.3420 | <i>T. brucei</i> | 103 | 223  | 325  |
| Tbg972.9.3420 | <i>T. brucei</i> | 54  | 350  | 403  |
| Tbg972.9.3420 | <i>T. brucei</i> | 100 | 408  | 507  |

|               |                  |     |      |      |
|---------------|------------------|-----|------|------|
| Tbg972.9.3420 | <i>T. brucei</i> | 210 | 530  | 739  |
| Tbg972.9.3420 | <i>T. brucei</i> | 317 | 845  | 1161 |
| Tbg972.9.3420 | <i>T. brucei</i> | 336 | 1186 | 1521 |
| Tbg972.9.3430 | <i>T. brucei</i> | 151 | 35   | 185  |
| Tbg972.9.3440 | <i>T. brucei</i> | 52  | 615  | 666  |
| Tbg972.9.3460 | <i>T. brucei</i> | 41  | 90   | 130  |
| Tbg972.9.3460 | <i>T. brucei</i> | 80  | 892  | 971  |
| Tbg972.9.3460 | <i>T. brucei</i> | 80  | 892  | 971  |
| Tbg972.9.3470 | <i>T. brucei</i> | 319 | 324  | 642  |
| Tbg972.9.3480 | <i>T. brucei</i> | 43  | 1    | 43   |
| Tbg972.9.3490 | <i>T. brucei</i> | 77  | 1    | 77   |
| Tbg972.9.350  | <i>T. brucei</i> | 40  | 22   | 61   |
| Tbg972.9.3500 | <i>T. brucei</i> | 66  | 1    | 66   |
| Tbg972.9.3500 | <i>T. brucei</i> | 43  | 167  | 209  |
| Tbg972.9.3500 | <i>T. brucei</i> | 43  | 167  | 209  |
| Tbg972.9.3510 | <i>T. brucei</i> | 72  | 300  | 371  |
| Tbg972.9.3520 | <i>T. brucei</i> | 41  | 158  | 198  |
| Tbg972.9.3530 | <i>T. brucei</i> | 42  | 30   | 71   |
| Tbg972.9.3530 | <i>T. brucei</i> | 72  | 2208 | 2279 |
| Tbg972.9.3530 | <i>T. brucei</i> | 72  | 2208 | 2279 |
| Tbg972.9.3540 | <i>T. brucei</i> | 44  | 223  | 266  |
| Tbg972.9.3550 | <i>T. brucei</i> | 87  | 14   | 100  |
| Tbg972.9.3570 | <i>T. brucei</i> | 46  | 75   | 120  |
| Tbg972.9.3580 | <i>T. brucei</i> | 146 | 1    | 146  |
| Tbg972.9.360  | <i>T. brucei</i> | 151 | 94   | 244  |
| Tbg972.9.3610 | <i>T. brucei</i> | 85  | 64   | 148  |
| Tbg972.9.3620 | <i>T. brucei</i> | 44  | 471  | 514  |
| Tbg972.9.3620 | <i>T. brucei</i> | 45  | 607  | 651  |
| Tbg972.9.3620 | <i>T. brucei</i> | 45  | 607  | 651  |
| Tbg972.9.3640 | <i>T. brucei</i> | 70  | 59   | 128  |
| Tbg972.9.3660 | <i>T. brucei</i> | 92  | 1    | 92   |
| Tbg972.9.3660 | <i>T. brucei</i> | 242 | 121  | 362  |
| Tbg972.9.3670 | <i>T. brucei</i> | 224 | 1    | 224  |
| Tbg972.9.3680 | <i>T. brucei</i> | 45  | 1    | 45   |
| Tbg972.9.370  | <i>T. brucei</i> | 70  | 1    | 70   |
| Tbg972.9.370  | <i>T. brucei</i> | 253 | 398  | 650  |
| Tbg972.9.3720 | <i>T. brucei</i> | 84  | 26   | 109  |
| Tbg972.9.3740 | <i>T. brucei</i> | 107 | 34   | 140  |
| Tbg972.9.3740 | <i>T. brucei</i> | 90  | 191  | 280  |
| Tbg972.9.3740 | <i>T. brucei</i> | 90  | 191  | 280  |
| Tbg972.9.3750 | <i>T. brucei</i> | 91  | 78   | 168  |
| Tbg972.9.3750 | <i>T. brucei</i> | 58  | 240  | 297  |
| Tbg972.9.3750 | <i>T. brucei</i> | 58  | 240  | 297  |
| Tbg972.9.3770 | <i>T. brucei</i> | 50  | 77   | 126  |
| Tbg972.9.3780 | <i>T. brucei</i> | 155 | 63   | 217  |
| Tbg972.9.3780 | <i>T. brucei</i> | 62  | 261  | 322  |
| Tbg972.9.3780 | <i>T. brucei</i> | 62  | 261  | 322  |

|               |                  |     |      |      |
|---------------|------------------|-----|------|------|
| Tbg972.9.3790 | <i>T. brucei</i> | 40  | 55   | 94   |
| Tbg972.9.3790 | <i>T. brucei</i> | 147 | 100  | 246  |
| Tbg972.9.3810 | <i>T. brucei</i> | 117 | 1    | 117  |
| Tbg972.9.3820 | <i>T. brucei</i> | 57  | 24   | 80   |
| Tbg972.9.3840 | <i>T. brucei</i> | 42  | 1    | 42   |
| Tbg972.9.3840 | <i>T. brucei</i> | 58  | 148  | 205  |
| Tbg972.9.3840 | <i>T. brucei</i> | 58  | 148  | 205  |
| Tbg972.9.3850 | <i>T. brucei</i> | 81  | 61   | 141  |
| Tbg972.9.3850 | <i>T. brucei</i> | 65  | 229  | 293  |
| Tbg972.9.3860 | <i>T. brucei</i> | 109 | 1    | 109  |
| Tbg972.9.3860 | <i>T. brucei</i> | 53  | 723  | 775  |
| Tbg972.9.3860 | <i>T. brucei</i> | 297 | 1394 | 1690 |
| Tbg972.9.3890 | <i>T. brucei</i> | 48  | 317  | 364  |
| Tbg972.9.390  | <i>T. brucei</i> | 62  | 152  | 213  |
| Tbg972.9.3930 | <i>T. brucei</i> | 93  | 91   | 183  |
| Tbg972.9.4000 | <i>T. brucei</i> | 52  | 296  | 347  |
| Tbg972.9.4010 | <i>T. brucei</i> | 81  | 69   | 149  |
| Tbg972.9.4010 | <i>T. brucei</i> | 42  | 219  | 260  |
| Tbg972.9.4010 | <i>T. brucei</i> | 42  | 219  | 260  |
| Tbg972.9.4060 | <i>T. brucei</i> | 62  | 228  | 289  |
| Tbg972.9.4070 | <i>T. brucei</i> | 221 | 1    | 221  |
| Tbg972.9.4070 | <i>T. brucei</i> | 115 | 277  | 391  |
| Tbg972.9.4070 | <i>T. brucei</i> | 60  | 434  | 493  |
| Tbg972.9.4080 | <i>T. brucei</i> | 42  | 305  | 346  |
| Tbg972.9.410  | <i>T. brucei</i> | 60  | 40   | 99   |
| Tbg972.9.410  | <i>T. brucei</i> | 59  | 160  | 218  |
| Tbg972.9.410  | <i>T. brucei</i> | 59  | 160  | 218  |
| Tbg972.9.4110 | <i>T. brucei</i> | 84  | 1    | 84   |
| Tbg972.9.4130 | <i>T. brucei</i> | 50  | 89   | 138  |
| Tbg972.9.4180 | <i>T. brucei</i> | 40  | 1    | 40   |
| Tbg972.9.4180 | <i>T. brucei</i> | 62  | 49   | 110  |
| Tbg972.9.4180 | <i>T. brucei</i> | 108 | 128  | 235  |
| Tbg972.9.4190 | <i>T. brucei</i> | 66  | 1    | 66   |
| Tbg972.9.4190 | <i>T. brucei</i> | 86  | 69   | 154  |
| Tbg972.9.4190 | <i>T. brucei</i> | 229 | 184  | 412  |
| Tbg972.9.4190 | <i>T. brucei</i> | 75  | 533  | 607  |
| Tbg972.9.4190 | <i>T. brucei</i> | 277 | 771  | 1047 |
| Tbg972.9.4190 | <i>T. brucei</i> | 269 | 1187 | 1455 |
| Tbg972.9.4190 | <i>T. brucei</i> | 388 | 1470 | 1857 |
| Tbg972.9.4200 | <i>T. brucei</i> | 43  | 724  | 766  |
| Tbg972.9.4210 | <i>T. brucei</i> | 63  | 100  | 162  |
| Tbg972.9.4220 | <i>T. brucei</i> | 40  | 1155 | 1194 |
| Tbg972.9.4240 | <i>T. brucei</i> | 128 | 194  | 321  |
| Tbg972.9.4250 | <i>T. brucei</i> | 142 | 646  | 787  |
| Tbg972.9.4250 | <i>T. brucei</i> | 61  | 863  | 923  |
| Tbg972.9.4280 | <i>T. brucei</i> | 148 | 1    | 148  |
| Tbg972.9.4290 | <i>T. brucei</i> | 58  | 24   | 81   |

|               |                  |     |      |      |
|---------------|------------------|-----|------|------|
| Tbg972.9.4290 | <i>T. brucei</i> | 94  | 92   | 185  |
| Tbg972.9.4290 | <i>T. brucei</i> | 133 | 195  | 327  |
| Tbg972.9.4290 | <i>T. brucei</i> | 44  | 346  | 389  |
| Tbg972.9.4290 | <i>T. brucei</i> | 169 | 405  | 573  |
| Tbg972.9.4290 | <i>T. brucei</i> | 162 | 580  | 741  |
| Tbg972.9.430  | <i>T. brucei</i> | 53  | 1    | 53   |
| Tbg972.9.430  | <i>T. brucei</i> | 45  | 75   | 119  |
| Tbg972.9.430  | <i>T. brucei</i> | 74  | 472  | 545  |
| Tbg972.9.430  | <i>T. brucei</i> | 95  | 550  | 644  |
| Tbg972.9.4310 | <i>T. brucei</i> | 45  | 1    | 45   |
| Tbg972.9.4320 | <i>T. brucei</i> | 169 | 109  | 277  |
| Tbg972.9.4330 | <i>T. brucei</i> | 56  | 101  | 156  |
| Tbg972.9.4330 | <i>T. brucei</i> | 51  | 172  | 222  |
| Tbg972.9.4330 | <i>T. brucei</i> | 51  | 172  | 222  |
| Tbg972.9.4350 | <i>T. brucei</i> | 58  | 1    | 58   |
| Tbg972.9.4360 | <i>T. brucei</i> | 47  | 1    | 47   |
| Tbg972.9.4370 | <i>T. brucei</i> | 105 | 27   | 131  |
| Tbg972.9.4380 | <i>T. brucei</i> | 67  | 32   | 98   |
| Tbg972.9.4380 | <i>T. brucei</i> | 50  | 195  | 244  |
| Tbg972.9.4380 | <i>T. brucei</i> | 63  | 320  | 382  |
| Tbg972.9.4400 | <i>T. brucei</i> | 64  | 123  | 186  |
| Tbg972.9.4400 | <i>T. brucei</i> | 272 | 305  | 576  |
| Tbg972.9.4420 | <i>T. brucei</i> | 50  | 1    | 50   |
| Tbg972.9.4420 | <i>T. brucei</i> | 61  | 89   | 149  |
| Tbg972.9.4430 | <i>T. brucei</i> | 50  | 1    | 50   |
| Tbg972.9.4430 | <i>T. brucei</i> | 61  | 89   | 149  |
| Tbg972.9.4440 | <i>T. brucei</i> | 44  | 387  | 430  |
| Tbg972.9.4450 | <i>T. brucei</i> | 50  | 18   | 67   |
| Tbg972.9.4450 | <i>T. brucei</i> | 64  | 207  | 270  |
| Tbg972.9.4450 | <i>T. brucei</i> | 40  | 365  | 404  |
| Tbg972.9.4450 | <i>T. brucei</i> | 206 | 437  | 642  |
| Tbg972.9.4460 | <i>T. brucei</i> | 112 | 59   | 170  |
| Tbg972.9.4470 | <i>T. brucei</i> | 221 | 438  | 658  |
| Tbg972.9.4480 | <i>T. brucei</i> | 64  | 303  | 366  |
| Tbg972.9.4490 | <i>T. brucei</i> | 234 | 33   | 266  |
| Tbg972.9.4490 | <i>T. brucei</i> | 72  | 290  | 361  |
| Tbg972.9.4490 | <i>T. brucei</i> | 100 | 371  | 470  |
| Tbg972.9.450  | <i>T. brucei</i> | 69  | 1531 | 1599 |
| Tbg972.9.450  | <i>T. brucei</i> | 44  | 1994 | 2037 |
| Tbg972.9.450  | <i>T. brucei</i> | 59  | 2141 | 2199 |
| Tbg972.9.450  | <i>T. brucei</i> | 80  | 2242 | 2321 |
| Tbg972.9.450  | <i>T. brucei</i> | 95  | 2862 | 2956 |
| Tbg972.9.450  | <i>T. brucei</i> | 219 | 3659 | 3877 |
| Tbg972.9.450  | <i>T. brucei</i> | 54  | 4053 | 4106 |
| Tbg972.9.450  | <i>T. brucei</i> | 93  | 4185 | 4277 |
| Tbg972.9.4500 | <i>T. brucei</i> | 42  | 352  | 393  |
| Tbg972.9.4510 | <i>T. brucei</i> | 43  | 70   | 112  |

|               |                  |     |      |      |
|---------------|------------------|-----|------|------|
| Tbg972.9.4520 | <i>T. brucei</i> | 58  | 161  | 218  |
| Tbg972.9.4530 | <i>T. brucei</i> | 152 | 1    | 152  |
| Tbg972.9.4530 | <i>T. brucei</i> | 296 | 190  | 485  |
| Tbg972.9.4540 | <i>T. brucei</i> | 71  | 1    | 71   |
| Tbg972.9.4540 | <i>T. brucei</i> | 72  | 193  | 264  |
| Tbg972.9.4540 | <i>T. brucei</i> | 184 | 421  | 604  |
| Tbg972.9.4580 | <i>T. brucei</i> | 95  | 40   | 134  |
| Tbg972.9.4580 | <i>T. brucei</i> | 364 | 222  | 585  |
| Tbg972.9.4590 | <i>T. brucei</i> | 126 | 80   | 205  |
| Tbg972.9.4590 | <i>T. brucei</i> | 96  | 234  | 329  |
| Tbg972.9.4590 | <i>T. brucei</i> | 96  | 234  | 329  |
| Tbg972.9.460  | <i>T. brucei</i> | 52  | 126  | 177  |
| Tbg972.9.460  | <i>T. brucei</i> | 85  | 317  | 401  |
| Tbg972.9.460  | <i>T. brucei</i> | 60  | 894  | 953  |
| Tbg972.9.4630 | <i>T. brucei</i> | 98  | 97   | 194  |
| Tbg972.9.4640 | <i>T. brucei</i> | 279 | 33   | 311  |
| Tbg972.9.4650 | <i>T. brucei</i> | 44  | 1    | 44   |
| Tbg972.9.4650 | <i>T. brucei</i> | 55  | 391  | 445  |
| Tbg972.9.4650 | <i>T. brucei</i> | 55  | 391  | 445  |
| Tbg972.9.4660 | <i>T. brucei</i> | 217 | 62   | 278  |
| Tbg972.9.4670 | <i>T. brucei</i> | 74  | 55   | 128  |
| Tbg972.9.4680 | <i>T. brucei</i> | 210 | 1    | 210  |
| Tbg972.9.470  | <i>T. brucei</i> | 40  | 335  | 374  |
| Tbg972.9.470  | <i>T. brucei</i> | 42  | 506  | 547  |
| Tbg972.9.470  | <i>T. brucei</i> | 42  | 506  | 547  |
| Tbg972.9.4710 | <i>T. brucei</i> | 81  | 12   | 92   |
| Tbg972.9.4720 | <i>T. brucei</i> | 253 | 1    | 253  |
| Tbg972.9.4720 | <i>T. brucei</i> | 61  | 771  | 831  |
| Tbg972.9.4730 | <i>T. brucei</i> | 445 | 1    | 445  |
| Tbg972.9.4730 | <i>T. brucei</i> | 403 | 499  | 901  |
| Tbg972.9.4730 | <i>T. brucei</i> | 125 | 989  | 1113 |
| Tbg972.9.4740 | <i>T. brucei</i> | 60  | 49   | 108  |
| Tbg972.9.4750 | <i>T. brucei</i> | 50  | 52   | 101  |
| Tbg972.9.4770 | <i>T. brucei</i> | 245 | 36   | 280  |
| Tbg972.9.4770 | <i>T. brucei</i> | 61  | 316  | 376  |
| Tbg972.9.4770 | <i>T. brucei</i> | 72  | 378  | 449  |
| Tbg972.9.4790 | <i>T. brucei</i> | 231 | 1    | 231  |
| Tbg972.9.4790 | <i>T. brucei</i> | 81  | 267  | 347  |
| Tbg972.9.480  | <i>T. brucei</i> | 218 | 25   | 242  |
| Tbg972.9.4800 | <i>T. brucei</i> | 46  | 220  | 265  |
| Tbg972.9.4820 | <i>T. brucei</i> | 62  | 83   | 144  |
| Tbg972.9.4840 | <i>T. brucei</i> | 84  | 1    | 84   |
| Tbg972.9.4840 | <i>T. brucei</i> | 63  | 265  | 327  |
| Tbg972.9.4860 | <i>T. brucei</i> | 101 | 1176 | 1276 |
| Tbg972.9.4860 | <i>T. brucei</i> | 67  | 1304 | 1370 |
| Tbg972.9.4860 | <i>T. brucei</i> | 61  | 1402 | 1462 |
| Tbg972.9.4860 | <i>T. brucei</i> | 183 | 1482 | 1664 |

|               |                  |     |      |      |
|---------------|------------------|-----|------|------|
| Tbg972.9.4860 | <i>T. brucei</i> | 40  | 1704 | 1743 |
| Tbg972.9.4860 | <i>T. brucei</i> | 143 | 1863 | 2005 |
| Tbg972.9.4860 | <i>T. brucei</i> | 117 | 2024 | 2140 |
| Tbg972.9.4860 | <i>T. brucei</i> | 144 | 2181 | 2324 |
| Tbg972.9.4890 | <i>T. brucei</i> | 395 | 83   | 477  |
| Tbg972.9.4890 | <i>T. brucei</i> | 56  | 918  | 973  |
| Tbg972.9.490  | <i>T. brucei</i> | 40  | 1    | 40   |
| Tbg972.9.490  | <i>T. brucei</i> | 65  | 63   | 127  |
| Tbg972.9.490  | <i>T. brucei</i> | 65  | 63   | 127  |
| Tbg972.9.4900 | <i>T. brucei</i> | 48  | 1    | 48   |
| Tbg972.9.4920 | <i>T. brucei</i> | 61  | 210  | 270  |
| Tbg972.9.4970 | <i>T. brucei</i> | 54  | 155  | 208  |
| Tbg972.9.4990 | <i>T. brucei</i> | 113 | 169  | 281  |
| Tbg972.9.500  | <i>T. brucei</i> | 40  | 1    | 40   |
| Tbg972.9.500  | <i>T. brucei</i> | 65  | 63   | 127  |
| Tbg972.9.500  | <i>T. brucei</i> | 65  | 63   | 127  |
| Tbg972.9.5000 | <i>T. brucei</i> | 63  | 1    | 63   |
| Tbg972.9.5010 | <i>T. brucei</i> | 58  | 1    | 58   |
| Tbg972.9.5020 | <i>T. brucei</i> | 54  | 67   | 120  |
| Tbg972.9.5040 | <i>T. brucei</i> | 41  | 100  | 140  |
| Tbg972.9.5080 | <i>T. brucei</i> | 48  | 50   | 97   |
| Tbg972.9.5080 | <i>T. brucei</i> | 50  | 136  | 185  |
| Tbg972.9.5080 | <i>T. brucei</i> | 177 | 226  | 402  |
| Tbg972.9.5090 | <i>T. brucei</i> | 99  | 353  | 451  |
| Tbg972.9.510  | <i>T. brucei</i> | 76  | 229  | 304  |
| Tbg972.9.510  | <i>T. brucei</i> | 148 | 371  | 518  |
| Tbg972.9.5100 | <i>T. brucei</i> | 115 | 57   | 171  |
| Tbg972.9.5110 | <i>T. brucei</i> | 111 | 1    | 111  |
| Tbg972.9.5110 | <i>T. brucei</i> | 47  | 333  | 379  |
| Tbg972.9.5120 | <i>T. brucei</i> | 105 | 1    | 105  |
| Tbg972.9.5120 | <i>T. brucei</i> | 45  | 299  | 343  |
| Tbg972.9.5170 | <i>T. brucei</i> | 69  | 83   | 151  |
| Tbg972.9.5190 | <i>T. brucei</i> | 89  | 81   | 169  |
| Tbg972.9.5190 | <i>T. brucei</i> | 102 | 237  | 338  |
| Tbg972.9.520  | <i>T. brucei</i> | 178 | 38   | 215  |
| Tbg972.9.5200 | <i>T. brucei</i> | 88  | 49   | 136  |
| Tbg972.9.5200 | <i>T. brucei</i> | 217 | 172  | 388  |
| Tbg972.9.5210 | <i>T. brucei</i> | 131 | 376  | 506  |
| Tbg972.9.5220 | <i>T. brucei</i> | 161 | 22   | 182  |
| Tbg972.9.5220 | <i>T. brucei</i> | 57  | 189  | 245  |
| Tbg972.9.5220 | <i>T. brucei</i> | 57  | 189  | 245  |
| Tbg972.9.5230 | <i>T. brucei</i> | 68  | 1    | 68   |
| Tbg972.9.5240 | <i>T. brucei</i> | 81  | 1    | 81   |
| Tbg972.9.5250 | <i>T. brucei</i> | 93  | 272  | 364  |
| Tbg972.9.5270 | <i>T. brucei</i> | 40  | 50   | 89   |
| Tbg972.9.540  | <i>T. brucei</i> | 120 | 62   | 181  |
| Tbg972.9.540  | <i>T. brucei</i> | 58  | 412  | 469  |

|               |                  |     |      |      |
|---------------|------------------|-----|------|------|
| Tbg972.9.540  | <i>T. brucei</i> | 85  | 664  | 748  |
| Tbg972.9.5400 | <i>T. brucei</i> | 148 | 1    | 148  |
| Tbg972.9.5410 | <i>T. brucei</i> | 48  | 1    | 48   |
| Tbg972.9.5410 | <i>T. brucei</i> | 706 | 164  | 869  |
| Tbg972.9.5410 | <i>T. brucei</i> | 143 | 887  | 1029 |
| Tbg972.9.5440 | <i>T. brucei</i> | 56  | 207  | 262  |
| Tbg972.9.5440 | <i>T. brucei</i> | 54  | 292  | 345  |
| Tbg972.9.5440 | <i>T. brucei</i> | 54  | 292  | 345  |
| Tbg972.9.5450 | <i>T. brucei</i> | 180 | 33   | 212  |
| Tbg972.9.5460 | <i>T. brucei</i> | 122 | 1    | 122  |
| Tbg972.9.5460 | <i>T. brucei</i> | 59  | 550  | 608  |
| Tbg972.9.5470 | <i>T. brucei</i> | 120 | 654  | 773  |
| Tbg972.9.5480 | <i>T. brucei</i> | 50  | 1    | 50   |
| Tbg972.9.550  | <i>T. brucei</i> | 48  | 96   | 143  |
| Tbg972.9.5510 | <i>T. brucei</i> | 546 | 33   | 578  |
| Tbg972.9.5510 | <i>T. brucei</i> | 364 | 622  | 985  |
| Tbg972.9.5520 | <i>T. brucei</i> | 67  | 1    | 67   |
| Tbg972.9.5550 | <i>T. brucei</i> | 60  | 202  | 261  |
| Tbg972.9.5560 | <i>T. brucei</i> | 55  | 17   | 71   |
| Tbg972.9.5600 | <i>T. brucei</i> | 122 | 1296 | 1417 |
| Tbg972.9.5610 | <i>T. brucei</i> | 48  | 1    | 48   |
| Tbg972.9.5630 | <i>T. brucei</i> | 52  | 303  | 354  |
| Tbg972.9.5670 | <i>T. brucei</i> | 46  | 314  | 359  |
| Tbg972.9.5670 | <i>T. brucei</i> | 48  | 554  | 601  |
| Tbg972.9.5670 | <i>T. brucei</i> | 73  | 648  | 720  |
| Tbg972.9.5680 | <i>T. brucei</i> | 48  | 24   | 71   |
| Tbg972.9.5690 | <i>T. brucei</i> | 61  | 210  | 270  |
| Tbg972.9.570  | <i>T. brucei</i> | 57  | 73   | 129  |
| Tbg972.9.570  | <i>T. brucei</i> | 157 | 324  | 480  |
| Tbg972.9.570  | <i>T. brucei</i> | 157 | 324  | 480  |
| Tbg972.9.5720 | <i>T. brucei</i> | 62  | 36   | 97   |
| Tbg972.9.5730 | <i>T. brucei</i> | 47  | 25   | 71   |
| Tbg972.9.5730 | <i>T. brucei</i> | 92  | 123  | 214  |
| Tbg972.9.5730 | <i>T. brucei</i> | 49  | 353  | 401  |
| Tbg972.9.5730 | <i>T. brucei</i> | 41  | 449  | 489  |
| Tbg972.9.5740 | <i>T. brucei</i> | 65  | 306  | 370  |
| Tbg972.9.5750 | <i>T. brucei</i> | 104 | 83   | 186  |
| Tbg972.9.5760 | <i>T. brucei</i> | 47  | 1    | 47   |
| Tbg972.9.5760 | <i>T. brucei</i> | 42  | 58   | 99   |
| Tbg972.9.5760 | <i>T. brucei</i> | 42  | 58   | 99   |
| Tbg972.9.5770 | <i>T. brucei</i> | 126 | 38   | 163  |
| Tbg972.9.580  | <i>T. brucei</i> | 58  | 138  | 195  |
| Tbg972.9.580  | <i>T. brucei</i> | 56  | 221  | 276  |
| Tbg972.9.580  | <i>T. brucei</i> | 95  | 381  | 475  |
| Tbg972.9.5800 | <i>T. brucei</i> | 57  | 211  | 267  |
| Tbg972.9.5810 | <i>T. brucei</i> | 43  | 382  | 424  |
| Tbg972.9.5870 | <i>T. brucei</i> | 75  | 407  | 481  |

|               |                  |     |      |      |
|---------------|------------------|-----|------|------|
| Tbg972.9.590  | <i>T. brucei</i> | 100 | 34   | 133  |
| Tbg972.9.590  | <i>T. brucei</i> | 134 | 156  | 289  |
| Tbg972.9.5910 | <i>T. brucei</i> | 71  | 174  | 244  |
| Tbg972.9.5910 | <i>T. brucei</i> | 48  | 275  | 322  |
| Tbg972.9.5910 | <i>T. brucei</i> | 61  | 601  | 661  |
| Tbg972.9.5930 | <i>T. brucei</i> | 51  | 113  | 163  |
| Tbg972.9.5950 | <i>T. brucei</i> | 44  | 1    | 44   |
| Tbg972.9.5950 | <i>T. brucei</i> | 53  | 73   | 125  |
| Tbg972.9.5950 | <i>T. brucei</i> | 53  | 73   | 125  |
| Tbg972.9.5960 | <i>T. brucei</i> | 80  | 59   | 138  |
| Tbg972.9.60   | <i>T. brucei</i> | 41  | 15   | 55   |
| Tbg972.9.60   | <i>T. brucei</i> | 48  | 84   | 131  |
| Tbg972.9.60   | <i>T. brucei</i> | 48  | 84   | 131  |
| Tbg972.9.6010 | <i>T. brucei</i> | 62  | 17   | 78   |
| Tbg972.9.6010 | <i>T. brucei</i> | 128 | 80   | 207  |
| Tbg972.9.6010 | <i>T. brucei</i> | 128 | 80   | 207  |
| Tbg972.9.6040 | <i>T. brucei</i> | 534 | 26   | 559  |
| Tbg972.9.6050 | <i>T. brucei</i> | 62  | 53   | 114  |
| Tbg972.9.6060 | <i>T. brucei</i> | 109 | 681  | 789  |
| Tbg972.9.6060 | <i>T. brucei</i> | 43  | 1238 | 1280 |
| Tbg972.9.6060 | <i>T. brucei</i> | 43  | 1238 | 1280 |
| Tbg972.9.6070 | <i>T. brucei</i> | 48  | 1180 | 1227 |
| Tbg972.9.610  | <i>T. brucei</i> | 62  | 1    | 62   |
| Tbg972.9.610  | <i>T. brucei</i> | 95  | 97   | 191  |
| Tbg972.9.610  | <i>T. brucei</i> | 73  | 204  | 276  |
| Tbg972.9.6100 | <i>T. brucei</i> | 70  | 1    | 70   |
| Tbg972.9.6100 | <i>T. brucei</i> | 62  | 225  | 286  |
| Tbg972.9.6100 | <i>T. brucei</i> | 98  | 365  | 462  |
| Tbg972.9.6100 | <i>T. brucei</i> | 42  | 511  | 552  |
| Tbg972.9.6110 | <i>T. brucei</i> | 40  | 39   | 78   |
| Tbg972.9.6130 | <i>T. brucei</i> | 40  | 39   | 78   |
| Tbg972.9.6140 | <i>T. brucei</i> | 53  | 1    | 53   |
| Tbg972.9.6140 | <i>T. brucei</i> | 46  | 125  | 170  |
| Tbg972.9.6140 | <i>T. brucei</i> | 53  | 293  | 345  |
| Tbg972.9.6140 | <i>T. brucei</i> | 78  | 462  | 539  |
| Tbg972.9.6140 | <i>T. brucei</i> | 70  | 621  | 690  |
| Tbg972.9.6140 | <i>T. brucei</i> | 97  | 725  | 821  |
| Tbg972.9.6140 | <i>T. brucei</i> | 52  | 864  | 915  |
| Tbg972.9.6150 | <i>T. brucei</i> | 45  | 1    | 45   |
| Tbg972.9.6150 | <i>T. brucei</i> | 346 | 200  | 545  |
| Tbg972.9.6150 | <i>T. brucei</i> | 124 | 584  | 707  |
| Tbg972.9.6170 | <i>T. brucei</i> | 50  | 119  | 168  |
| Tbg972.9.6180 | <i>T. brucei</i> | 164 | 24   | 187  |
| Tbg972.9.620  | <i>T. brucei</i> | 54  | 256  | 309  |
| Tbg972.9.620  | <i>T. brucei</i> | 58  | 369  | 426  |
| Tbg972.9.620  | <i>T. brucei</i> | 58  | 369  | 426  |
| Tbg972.9.6230 | <i>T. brucei</i> | 42  | 138  | 179  |



|               |                  |     |      |      |
|---------------|------------------|-----|------|------|
| Tbg972.9.6230 | <i>T. brucei</i> | 40  | 479  | 518  |
| Tbg972.9.6230 | <i>T. brucei</i> | 40  | 479  | 518  |
| Tbg972.9.6240 | <i>T. brucei</i> | 86  | 46   | 131  |
| Tbg972.9.6250 | <i>T. brucei</i> | 81  | 1    | 81   |
| Tbg972.9.6270 | <i>T. brucei</i> | 171 | 1    | 171  |
| Tbg972.9.6290 | <i>T. brucei</i> | 69  | 1    | 69   |
| Tbg972.9.6290 | <i>T. brucei</i> | 76  | 122  | 197  |
| Tbg972.9.630  | <i>T. brucei</i> | 50  | 1    | 50   |
| Tbg972.9.630  | <i>T. brucei</i> | 64  | 298  | 361  |
| Tbg972.9.630  | <i>T. brucei</i> | 64  | 298  | 361  |
| Tbg972.9.6310 | <i>T. brucei</i> | 48  | 69   | 116  |
| Tbg972.9.6330 | <i>T. brucei</i> | 61  | 238  | 298  |
| Tbg972.9.6330 | <i>T. brucei</i> | 131 | 362  | 492  |
| Tbg972.9.6340 | <i>T. brucei</i> | 97  | 1    | 97   |
| Tbg972.9.6340 | <i>T. brucei</i> | 188 | 118  | 305  |
| Tbg972.9.6350 | <i>T. brucei</i> | 86  | 318  | 403  |
| Tbg972.9.6360 | <i>T. brucei</i> | 49  | 72   | 120  |
| Tbg972.9.6370 | <i>T. brucei</i> | 51  | 39   | 89   |
| Tbg972.9.640  | <i>T. brucei</i> | 67  | 163  | 229  |
| Tbg972.9.640  | <i>T. brucei</i> | 72  | 256  | 327  |
| Tbg972.9.640  | <i>T. brucei</i> | 99  | 412  | 510  |
| Tbg972.9.6400 | <i>T. brucei</i> | 235 | 12   | 246  |
| Tbg972.9.6400 | <i>T. brucei</i> | 83  | 253  | 335  |
| Tbg972.9.6410 | <i>T. brucei</i> | 68  | 136  | 203  |
| Tbg972.9.6410 | <i>T. brucei</i> | 58  | 287  | 344  |
| Tbg972.9.6420 | <i>T. brucei</i> | 41  | 54   | 94   |
| Tbg972.9.6430 | <i>T. brucei</i> | 41  | 239  | 279  |
| Tbg972.9.6430 | <i>T. brucei</i> | 242 | 352  | 593  |
| Tbg972.9.6430 | <i>T. brucei</i> | 142 | 714  | 855  |
| Tbg972.9.6470 | <i>T. brucei</i> | 161 | 81   | 241  |
| Tbg972.9.6480 | <i>T. brucei</i> | 76  | 489  | 564  |
| Tbg972.9.6480 | <i>T. brucei</i> | 102 | 641  | 742  |
| Tbg972.9.6490 | <i>T. brucei</i> | 51  | 86   | 136  |
| Tbg972.9.6510 | <i>T. brucei</i> | 40  | 122  | 161  |
| Tbg972.9.6550 | <i>T. brucei</i> | 221 | 1    | 221  |
| Tbg972.9.6550 | <i>T. brucei</i> | 316 | 230  | 545  |
| Tbg972.9.6570 | <i>T. brucei</i> | 101 | 1    | 101  |
| Tbg972.9.6570 | <i>T. brucei</i> | 64  | 185  | 248  |
| Tbg972.9.6570 | <i>T. brucei</i> | 84  | 566  | 649  |
| Tbg972.9.6580 | <i>T. brucei</i> | 53  | 1    | 53   |
| Tbg972.9.660  | <i>T. brucei</i> | 54  | 431  | 484  |
| Tbg972.9.660  | <i>T. brucei</i> | 61  | 507  | 567  |
| Tbg972.9.660  | <i>T. brucei</i> | 61  | 507  | 567  |
| Tbg972.9.6600 | <i>T. brucei</i> | 62  | 371  | 432  |
| Tbg972.9.6600 | <i>T. brucei</i> | 42  | 481  | 522  |
| Tbg972.9.6600 | <i>T. brucei</i> | 41  | 710  | 750  |
| Tbg972.9.6600 | <i>T. brucei</i> | 44  | 1672 | 1715 |

|               |                  |     |      |      |
|---------------|------------------|-----|------|------|
| Tbg972.9.6600 | <i>T. brucei</i> | 61  | 2061 | 2121 |
| Tbg972.9.6610 | <i>T. brucei</i> | 86  | 1    | 86   |
| Tbg972.9.6630 | <i>T. brucei</i> | 207 | 107  | 313  |
| Tbg972.9.6630 | <i>T. brucei</i> | 79  | 398  | 476  |
| Tbg972.9.6640 | <i>T. brucei</i> | 43  | 641  | 683  |
| Tbg972.9.6650 | <i>T. brucei</i> | 73  | 54   | 126  |
| Tbg972.9.6660 | <i>T. brucei</i> | 64  | 53   | 116  |
| Tbg972.9.6690 | <i>T. brucei</i> | 41  | 44   | 84   |
| Tbg972.9.670  | <i>T. brucei</i> | 51  | 205  | 255  |
| Tbg972.9.670  | <i>T. brucei</i> | 95  | 450  | 544  |
| Tbg972.9.6700 | <i>T. brucei</i> | 42  | 1    | 42   |
| Tbg972.9.6710 | <i>T. brucei</i> | 63  | 382  | 444  |
| Tbg972.9.6730 | <i>T. brucei</i> | 49  | 520  | 568  |
| Tbg972.9.6740 | <i>T. brucei</i> | 84  | 224  | 307  |
| Tbg972.9.6770 | <i>T. brucei</i> | 141 | 1    | 141  |
| Tbg972.9.6770 | <i>T. brucei</i> | 96  | 173  | 268  |
| Tbg972.9.6770 | <i>T. brucei</i> | 66  | 279  | 344  |
| Tbg972.9.680  | <i>T. brucei</i> | 106 | 1    | 106  |
| Tbg972.9.6810 | <i>T. brucei</i> | 48  | 1    | 48   |
| Tbg972.9.6820 | <i>T. brucei</i> | 40  | 207  | 246  |
| Tbg972.9.6830 | <i>T. brucei</i> | 48  | 1    | 48   |
| Tbg972.9.6840 | <i>T. brucei</i> | 75  | 502  | 576  |
| Tbg972.9.6840 | <i>T. brucei</i> | 43  | 682  | 724  |
| Tbg972.9.6840 | <i>T. brucei</i> | 43  | 682  | 724  |
| Tbg972.9.6850 | <i>T. brucei</i> | 45  | 78   | 122  |
| Tbg972.9.6860 | <i>T. brucei</i> | 89  | 116  | 204  |
| Tbg972.9.6880 | <i>T. brucei</i> | 40  | 32   | 71   |
| Tbg972.9.6880 | <i>T. brucei</i> | 88  | 238  | 325  |
| Tbg972.9.6880 | <i>T. brucei</i> | 62  | 377  | 438  |
| Tbg972.9.6960 | <i>T. brucei</i> | 80  | 124  | 203  |
| Tbg972.9.6960 | <i>T. brucei</i> | 83  | 210  | 292  |
| Tbg972.9.6960 | <i>T. brucei</i> | 342 | 319  | 660  |
| Tbg972.9.6970 | <i>T. brucei</i> | 58  | 99   | 156  |
| Tbg972.9.6970 | <i>T. brucei</i> | 95  | 159  | 253  |
| Tbg972.9.6970 | <i>T. brucei</i> | 95  | 159  | 253  |
| Tbg972.9.6980 | <i>T. brucei</i> | 51  | 130  | 180  |
| Tbg972.9.70   | <i>T. brucei</i> | 559 | 33   | 591  |
| Tbg972.9.70   | <i>T. brucei</i> | 55  | 598  | 652  |
| Tbg972.9.700  | <i>T. brucei</i> | 93  | 1    | 93   |
| Tbg972.9.700  | <i>T. brucei</i> | 40  | 149  | 188  |
| Tbg972.9.700  | <i>T. brucei</i> | 40  | 149  | 188  |
| Tbg972.9.7010 | <i>T. brucei</i> | 117 | 79   | 195  |
| Tbg972.9.7010 | <i>T. brucei</i> | 61  | 230  | 290  |
| Tbg972.9.7010 | <i>T. brucei</i> | 49  | 317  | 365  |
| Tbg972.9.7010 | <i>T. brucei</i> | 79  | 380  | 458  |
| Tbg972.9.7010 | <i>T. brucei</i> | 64  | 683  | 746  |
| Tbg972.9.7020 | <i>T. brucei</i> | 87  | 1    | 87   |

|               |                  |     |     |      |
|---------------|------------------|-----|-----|------|
| Tbg972.9.7020 | <i>T. brucei</i> | 46  | 694 | 739  |
| Tbg972.9.7020 | <i>T. brucei</i> | 63  | 892 | 954  |
| Tbg972.9.7020 | <i>T. brucei</i> | 43  | 961 | 1003 |
| Tbg972.9.7100 | <i>T. brucei</i> | 280 | 1   | 280  |
| Tbg972.9.7100 | <i>T. brucei</i> | 46  | 312 | 357  |
| Tbg972.9.7100 | <i>T. brucei</i> | 263 | 391 | 653  |
| Tbg972.9.7110 | <i>T. brucei</i> | 110 | 1   | 110  |
| Tbg972.9.7130 | <i>T. brucei</i> | 53  | 81  | 133  |
| Tbg972.9.7140 | <i>T. brucei</i> | 361 | 158 | 518  |
| Tbg972.9.7140 | <i>T. brucei</i> | 101 | 701 | 801  |
| Tbg972.9.7140 | <i>T. brucei</i> | 102 | 837 | 938  |
| Tbg972.9.7140 | <i>T. brucei</i> | 54  | 963 | 1016 |
| Tbg972.9.7160 | <i>T. brucei</i> | 57  | 76  | 132  |
| Tbg972.9.7160 | <i>T. brucei</i> | 51  | 220 | 270  |
| Tbg972.9.7160 | <i>T. brucei</i> | 51  | 220 | 270  |
| Tbg972.9.7170 | <i>T. brucei</i> | 249 | 192 | 440  |
| Tbg972.9.7180 | <i>T. brucei</i> | 78  | 212 | 289  |
| Tbg972.9.7180 | <i>T. brucei</i> | 502 | 463 | 964  |
| Tbg972.9.7200 | <i>T. brucei</i> | 85  | 303 | 387  |
| Tbg972.9.7210 | <i>T. brucei</i> | 192 | 1   | 192  |
| Tbg972.9.7210 | <i>T. brucei</i> | 47  | 362 | 408  |
| Tbg972.9.7240 | <i>T. brucei</i> | 55  | 98  | 152  |
| Tbg972.9.7290 | <i>T. brucei</i> | 65  | 412 | 476  |
| Tbg972.9.730  | <i>T. brucei</i> | 73  | 57  | 129  |
| Tbg972.9.730  | <i>T. brucei</i> | 46  | 365 | 410  |
| Tbg972.9.7300 | <i>T. brucei</i> | 63  | 51  | 113  |
| Tbg972.9.7310 | <i>T. brucei</i> | 64  | 1   | 64   |
| Tbg972.9.7310 | <i>T. brucei</i> | 54  | 96  | 149  |
| Tbg972.9.7320 | <i>T. brucei</i> | 173 | 11  | 183  |
| Tbg972.9.7340 | <i>T. brucei</i> | 89  | 330 | 418  |
| Tbg972.9.7390 | <i>T. brucei</i> | 110 | 150 | 259  |
| Tbg972.9.7410 | <i>T. brucei</i> | 48  | 38  | 85   |
| Tbg972.9.7430 | <i>T. brucei</i> | 66  | 1   | 66   |
| Tbg972.9.7440 | <i>T. brucei</i> | 66  | 1   | 66   |
| Tbg972.9.7450 | <i>T. brucei</i> | 132 | 1   | 132  |
| Tbg972.9.7470 | <i>T. brucei</i> | 191 | 1   | 191  |
| Tbg972.9.750  | <i>T. brucei</i> | 231 | 1   | 231  |
| Tbg972.9.7500 | <i>T. brucei</i> | 224 | 1   | 224  |
| Tbg972.9.7500 | <i>T. brucei</i> | 198 | 254 | 451  |
| Tbg972.9.7500 | <i>T. brucei</i> | 49  | 462 | 510  |
| Tbg972.9.7500 | <i>T. brucei</i> | 73  | 605 | 677  |
| Tbg972.9.7500 | <i>T. brucei</i> | 155 | 711 | 865  |
| Tbg972.9.7520 | <i>T. brucei</i> | 41  | 131 | 171  |
| Tbg972.9.7530 | <i>T. brucei</i> | 242 | 1   | 242  |
| Tbg972.9.7540 | <i>T. brucei</i> | 67  | 1   | 67   |
| Tbg972.9.7550 | <i>T. brucei</i> | 160 | 333 | 492  |
| Tbg972.9.7550 | <i>T. brucei</i> | 65  | 496 | 560  |

|               |                  |     |      |      |
|---------------|------------------|-----|------|------|
| Tbg972.9.7570 | <i>T. brucei</i> | 51  | 1    | 51   |
| Tbg972.9.7570 | <i>T. brucei</i> | 45  | 63   | 107  |
| Tbg972.9.7570 | <i>T. brucei</i> | 61  | 264  | 324  |
| Tbg972.9.7580 | <i>T. brucei</i> | 116 | 1    | 116  |
| Tbg972.9.7590 | <i>T. brucei</i> | 232 | 18   | 249  |
| Tbg972.9.7590 | <i>T. brucei</i> | 43  | 379  | 421  |
| Tbg972.9.7590 | <i>T. brucei</i> | 67  | 536  | 602  |
| Tbg972.9.7590 | <i>T. brucei</i> | 43  | 1201 | 1243 |
| Tbg972.9.7620 | <i>T. brucei</i> | 136 | 259  | 394  |
| Tbg972.9.7660 | <i>T. brucei</i> | 75  | 49   | 123  |
| Tbg972.9.7660 | <i>T. brucei</i> | 68  | 751  | 818  |
| Tbg972.9.7660 | <i>T. brucei</i> | 129 | 1087 | 1215 |
| Tbg972.9.7680 | <i>T. brucei</i> | 271 | 1    | 271  |
| Tbg972.9.7680 | <i>T. brucei</i> | 66  | 673  | 738  |
| Tbg972.9.7690 | <i>T. brucei</i> | 55  | 78   | 132  |
| Tbg972.9.7690 | <i>T. brucei</i> | 49  | 175  | 223  |
| Tbg972.9.7690 | <i>T. brucei</i> | 48  | 370  | 417  |
| Tbg972.9.770  | <i>T. brucei</i> | 83  | 28   | 110  |
| Tbg972.9.770  | <i>T. brucei</i> | 45  | 151  | 195  |
| Tbg972.9.770  | <i>T. brucei</i> | 41  | 272  | 312  |
| Tbg972.9.7700 | <i>T. brucei</i> | 41  | 472  | 512  |
| Tbg972.9.7710 | <i>T. brucei</i> | 41  | 472  | 512  |
| Tbg972.9.7720 | <i>T. brucei</i> | 70  | 1    | 70   |
| Tbg972.9.7720 | <i>T. brucei</i> | 61  | 391  | 451  |
| Tbg972.9.7720 | <i>T. brucei</i> | 40  | 912  | 951  |
| Tbg972.9.7730 | <i>T. brucei</i> | 98  | 67   | 164  |
| Tbg972.9.7730 | <i>T. brucei</i> | 42  | 237  | 278  |
| Tbg972.9.7730 | <i>T. brucei</i> | 48  | 316  | 363  |
| Tbg972.9.7780 | <i>T. brucei</i> | 69  | 305  | 373  |
| Tbg972.9.7790 | <i>T. brucei</i> | 125 | 28   | 152  |
| Tbg972.9.7790 | <i>T. brucei</i> | 88  | 155  | 242  |
| Tbg972.9.7790 | <i>T. brucei</i> | 86  | 366  | 451  |
| Tbg972.9.780  | <i>T. brucei</i> | 119 | 98   | 216  |
| Tbg972.9.780  | <i>T. brucei</i> | 220 | 295  | 514  |
| Tbg972.9.780  | <i>T. brucei</i> | 84  | 603  | 686  |
| Tbg972.9.780  | <i>T. brucei</i> | 59  | 690  | 748  |
| Tbg972.9.7800 | <i>T. brucei</i> | 41  | 308  | 348  |
| Tbg972.9.7810 | <i>T. brucei</i> | 70  | 134  | 203  |
| Tbg972.9.7820 | <i>T. brucei</i> | 58  | 732  | 789  |
| Tbg972.9.7830 | <i>T. brucei</i> | 42  | 377  | 418  |
| Tbg972.9.7830 | <i>T. brucei</i> | 42  | 463  | 504  |
| Tbg972.9.7830 | <i>T. brucei</i> | 42  | 463  | 504  |
| Tbg972.9.7850 | <i>T. brucei</i> | 79  | 1    | 79   |
| Tbg972.9.7850 | <i>T. brucei</i> | 73  | 188  | 260  |
| Tbg972.9.7850 | <i>T. brucei</i> | 139 | 431  | 569  |
| Tbg972.9.7850 | <i>T. brucei</i> | 41  | 709  | 749  |
| Tbg972.9.7900 | <i>T. brucei</i> | 46  | 51   | 96   |

|               |                  |     |     |     |
|---------------|------------------|-----|-----|-----|
| Tbg972.9.7900 | <i>T. brucei</i> | 53  | 329 | 381 |
| Tbg972.9.7900 | <i>T. brucei</i> | 88  | 445 | 532 |
| Tbg972.9.7920 | <i>T. brucei</i> | 52  | 91  | 142 |
| Tbg972.9.7920 | <i>T. brucei</i> | 45  | 426 | 470 |
| Tbg972.9.7920 | <i>T. brucei</i> | 71  | 589 | 659 |
| Tbg972.9.7930 | <i>T. brucei</i> | 140 | 1   | 140 |
| Tbg972.9.7940 | <i>T. brucei</i> | 58  | 1   | 58  |
| Tbg972.9.7940 | <i>T. brucei</i> | 147 | 347 | 493 |
| Tbg972.9.7970 | <i>T. brucei</i> | 78  | 269 | 346 |
| Tbg972.9.800  | <i>T. brucei</i> | 682 | 1   | 682 |
| Tbg972.9.8000 | <i>T. brucei</i> | 46  | 1   | 46  |
| Tbg972.9.8000 | <i>T. brucei</i> | 53  | 335 | 387 |
| Tbg972.9.8000 | <i>T. brucei</i> | 47  | 654 | 700 |
| Tbg972.9.8000 | <i>T. brucei</i> | 113 | 762 | 874 |
| Tbg972.9.8000 | <i>T. brucei</i> | 55  | 945 | 999 |
| Tbg972.9.8010 | <i>T. brucei</i> | 65  | 15  | 79  |
| Tbg972.9.8010 | <i>T. brucei</i> | 76  | 323 | 398 |
| Tbg972.9.8010 | <i>T. brucei</i> | 45  | 564 | 608 |
| Tbg972.9.8020 | <i>T. brucei</i> | 89  | 171 | 259 |
| Tbg972.9.8020 | <i>T. brucei</i> | 84  | 288 | 371 |
| Tbg972.9.8030 | <i>T. brucei</i> | 56  | 51  | 106 |
| Tbg972.9.8030 | <i>T. brucei</i> | 49  | 157 | 205 |
| Tbg972.9.8030 | <i>T. brucei</i> | 49  | 157 | 205 |
| Tbg972.9.8040 | <i>T. brucei</i> | 58  | 315 | 372 |
| Tbg972.9.8060 | <i>T. brucei</i> | 51  | 236 | 286 |
| Tbg972.9.8060 | <i>T. brucei</i> | 73  | 356 | 428 |
| Tbg972.9.8060 | <i>T. brucei</i> | 73  | 356 | 428 |
| Tbg972.9.8070 | <i>T. brucei</i> | 85  | 1   | 85  |
| Tbg972.9.8070 | <i>T. brucei</i> | 87  | 400 | 486 |
| Tbg972.9.810  | <i>T. brucei</i> | 42  | 373 | 414 |
| Tbg972.9.8110 | <i>T. brucei</i> | 165 | 1   | 165 |
| Tbg972.9.8110 | <i>T. brucei</i> | 183 | 206 | 388 |
| Tbg972.9.8140 | <i>T. brucei</i> | 114 | 314 | 427 |
| Tbg972.9.8150 | <i>T. brucei</i> | 43  | 164 | 206 |
| Tbg972.9.8150 | <i>T. brucei</i> | 43  | 241 | 283 |
| Tbg972.9.8150 | <i>T. brucei</i> | 43  | 241 | 283 |
| Tbg972.9.8190 | <i>T. brucei</i> | 141 | 30  | 170 |
| Tbg972.9.8220 | <i>T. brucei</i> | 119 | 1   | 119 |
| Tbg972.9.8240 | <i>T. brucei</i> | 48  | 1   | 48  |
| Tbg972.9.8240 | <i>T. brucei</i> | 105 | 61  | 165 |
| Tbg972.9.8250 | <i>T. brucei</i> | 57  | 221 | 277 |
| Tbg972.9.8260 | <i>T. brucei</i> | 132 | 1   | 132 |
| Tbg972.9.8260 | <i>T. brucei</i> | 102 | 328 | 429 |
| Tbg972.9.8270 | <i>T. brucei</i> | 157 | 1   | 157 |
| Tbg972.9.8270 | <i>T. brucei</i> | 62  | 277 | 338 |
| Tbg972.9.8280 | <i>T. brucei</i> | 43  | 116 | 158 |
| Tbg972.9.8280 | <i>T. brucei</i> | 143 | 325 | 467 |

|               |                  |     |      |      |
|---------------|------------------|-----|------|------|
| Tbg972.9.830  | <i>T. brucei</i> | 70  | 1    | 70   |
| Tbg972.9.830  | <i>T. brucei</i> | 43  | 197  | 239  |
| Tbg972.9.8300 | <i>T. brucei</i> | 54  | 184  | 237  |
| Tbg972.9.8300 | <i>T. brucei</i> | 43  | 382  | 424  |
| Tbg972.9.8300 | <i>T. brucei</i> | 43  | 382  | 424  |
| Tbg972.9.8310 | <i>T. brucei</i> | 190 | 759  | 948  |
| Tbg972.9.8310 | <i>T. brucei</i> | 86  | 960  | 1045 |
| Tbg972.9.8310 | <i>T. brucei</i> | 76  | 1075 | 1150 |
| Tbg972.9.8330 | <i>T. brucei</i> | 234 | 1    | 234  |
| Tbg972.9.8330 | <i>T. brucei</i> | 76  | 236  | 311  |
| Tbg972.9.8340 | <i>T. brucei</i> | 174 | 1    | 174  |
| Tbg972.9.8340 | <i>T. brucei</i> | 89  | 249  | 337  |
| Tbg972.9.8350 | <i>T. brucei</i> | 42  | 660  | 701  |
| Tbg972.9.8350 | <i>T. brucei</i> | 82  | 901  | 982  |
| Tbg972.9.8350 | <i>T. brucei</i> | 68  | 1486 | 1553 |
| Tbg972.9.8350 | <i>T. brucei</i> | 60  | 1622 | 1681 |
| Tbg972.9.8350 | <i>T. brucei</i> | 40  | 1826 | 1865 |
| Tbg972.9.8370 | <i>T. brucei</i> | 52  | 312  | 363  |
| Tbg972.9.8390 | <i>T. brucei</i> | 45  | 1    | 45   |
| Tbg972.9.840  | <i>T. brucei</i> | 52  | 1    | 52   |
| Tbg972.9.840  | <i>T. brucei</i> | 61  | 98   | 158  |
| Tbg972.9.840  | <i>T. brucei</i> | 100 | 205  | 304  |
| Tbg972.9.840  | <i>T. brucei</i> | 107 | 345  | 451  |
| Tbg972.9.840  | <i>T. brucei</i> | 151 | 460  | 610  |
| Tbg972.9.840  | <i>T. brucei</i> | 60  | 710  | 769  |
| Tbg972.9.840  | <i>T. brucei</i> | 67  | 860  | 926  |
| Tbg972.9.840  | <i>T. brucei</i> | 140 | 1067 | 1206 |
| Tbg972.9.840  | <i>T. brucei</i> | 53  | 1215 | 1267 |
| Tbg972.9.840  | <i>T. brucei</i> | 86  | 1340 | 1425 |
| Tbg972.9.8400 | <i>T. brucei</i> | 92  | 12   | 103  |
| Tbg972.9.8410 | <i>T. brucei</i> | 74  | 155  | 228  |
| Tbg972.9.8410 | <i>T. brucei</i> | 66  | 358  | 423  |
| Tbg972.9.8410 | <i>T. brucei</i> | 66  | 358  | 423  |
| Tbg972.9.8420 | <i>T. brucei</i> | 65  | 190  | 254  |
| Tbg972.9.8430 | <i>T. brucei</i> | 71  | 231  | 301  |
| Tbg972.9.8430 | <i>T. brucei</i> | 87  | 337  | 423  |
| Tbg972.9.8430 | <i>T. brucei</i> | 83  | 468  | 550  |
| Tbg972.9.8440 | <i>T. brucei</i> | 104 | 52   | 155  |
| Tbg972.9.8480 | <i>T. brucei</i> | 82  | 75   | 156  |
| Tbg972.9.850  | <i>T. brucei</i> | 51  | 31   | 81   |
| Tbg972.9.850  | <i>T. brucei</i> | 74  | 263  | 336  |
| Tbg972.9.850  | <i>T. brucei</i> | 63  | 440  | 502  |
| Tbg972.9.850  | <i>T. brucei</i> | 183 | 534  | 716  |
| Tbg972.9.850  | <i>T. brucei</i> | 165 | 846  | 1010 |
| Tbg972.9.8510 | <i>T. brucei</i> | 68  | 36   | 103  |
| Tbg972.9.8510 | <i>T. brucei</i> | 44  | 180  | 223  |
| Tbg972.9.8510 | <i>T. brucei</i> | 42  | 305  | 346  |

|               |                  |     |      |      |
|---------------|------------------|-----|------|------|
| Tbg972.9.8560 | <i>T. brucei</i> | 257 | 1    | 257  |
| Tbg972.9.8560 | <i>T. brucei</i> | 280 | 259  | 538  |
| Tbg972.9.8560 | <i>T. brucei</i> | 51  | 1387 | 1437 |
| Tbg972.9.8570 | <i>T. brucei</i> | 52  | 131  | 182  |
| Tbg972.9.8570 | <i>T. brucei</i> | 75  | 633  | 707  |
| Tbg972.9.8570 | <i>T. brucei</i> | 43  | 809  | 851  |
| Tbg972.9.8570 | <i>T. brucei</i> | 40  | 1585 | 1624 |
| Tbg972.9.8690 | <i>T. brucei</i> | 67  | 53   | 119  |
| Tbg972.9.8700 | <i>T. brucei</i> | 77  | 26   | 102  |
| Tbg972.9.8720 | <i>T. brucei</i> | 91  | 63   | 153  |
| Tbg972.9.8730 | <i>T. brucei</i> | 119 | 101  | 219  |
| Tbg972.9.8730 | <i>T. brucei</i> | 47  | 255  | 301  |
| Tbg972.9.8750 | <i>T. brucei</i> | 40  | 1    | 40   |
| Tbg972.9.8750 | <i>T. brucei</i> | 59  | 74   | 132  |
| Tbg972.9.8750 | <i>T. brucei</i> | 48  | 439  | 486  |
| Tbg972.9.8750 | <i>T. brucei</i> | 64  | 620  | 683  |
| Tbg972.9.8770 | <i>T. brucei</i> | 75  | 380  | 454  |
| Tbg972.9.8780 | <i>T. brucei</i> | 50  | 56   | 105  |
| Tbg972.9.8810 | <i>T. brucei</i> | 42  | 94   | 135  |
| Tbg972.9.8830 | <i>T. brucei</i> | 59  | 56   | 114  |
| Tbg972.9.8840 | <i>T. brucei</i> | 240 | 183  | 422  |
| Tbg972.9.8840 | <i>T. brucei</i> | 104 | 428  | 531  |
| Tbg972.9.8850 | <i>T. brucei</i> | 53  | 403  | 455  |
| Tbg972.9.8880 | <i>T. brucei</i> | 46  | 71   | 116  |
| Tbg972.9.8880 | <i>T. brucei</i> | 71  | 569  | 639  |
| Tbg972.9.8880 | <i>T. brucei</i> | 71  | 569  | 639  |
| Tbg972.9.890  | <i>T. brucei</i> | 185 | 15   | 199  |
| Tbg972.9.890  | <i>T. brucei</i> | 106 | 218  | 323  |
| Tbg972.9.8910 | <i>T. brucei</i> | 77  | 1    | 77   |
| Tbg972.9.8930 | <i>T. brucei</i> | 47  | 220  | 266  |
| Tbg972.9.8930 | <i>T. brucei</i> | 153 | 340  | 492  |
| Tbg972.9.8940 | <i>T. brucei</i> | 156 | 37   | 192  |
| Tbg972.9.8950 | <i>T. brucei</i> | 52  | 356  | 407  |
| Tbg972.9.8970 | <i>T. brucei</i> | 43  | 770  | 812  |
| Tbg972.9.8980 | <i>T. brucei</i> | 40  | 85   | 124  |
| Tbg972.9.8990 | <i>T. brucei</i> | 309 | 160  | 468  |
| Tbg972.9.9010 | <i>T. brucei</i> | 271 | 140  | 410  |
| Tbg972.9.9010 | <i>T. brucei</i> | 148 | 419  | 566  |
| Tbg972.9.9010 | <i>T. brucei</i> | 148 | 419  | 566  |
| Tbg972.9.9020 | <i>T. brucei</i> | 83  | 50   | 132  |
| Tbg972.9.9020 | <i>T. brucei</i> | 184 | 402  | 585  |
| Tbg972.9.9020 | <i>T. brucei</i> | 49  | 740  | 788  |
| Tbg972.9.9030 | <i>T. brucei</i> | 62  | 1    | 62   |
| Tbg972.9.9030 | <i>T. brucei</i> | 41  | 103  | 143  |
| Tbg972.9.9030 | <i>T. brucei</i> | 41  | 103  | 143  |
| Tbg972.9.9040 | <i>T. brucei</i> | 177 | 158  | 334  |
| Tbg972.9.9080 | <i>T. brucei</i> | 116 | 1    | 116  |

|               |                  |     |      |      |
|---------------|------------------|-----|------|------|
| Tbg972.9.910  | <i>T. brucei</i> | 87  | 19   | 105  |
| Tbg972.9.910  | <i>T. brucei</i> | 90  | 354  | 443  |
| Tbg972.9.9130 | <i>T. brucei</i> | 83  | 41   | 123  |
| Tbg972.9.9130 | <i>T. brucei</i> | 75  | 1234 | 1308 |
| Tbg972.9.9140 | <i>T. brucei</i> | 141 | 1    | 141  |
| Tbg972.9.9190 | <i>T. brucei</i> | 44  | 1    | 44   |
| Tbg972.9.920  | <i>T. brucei</i> | 71  | 313  | 383  |
| Tbg972.9.9210 | <i>T. brucei</i> | 46  | 186  | 231  |
| Tbg972.9.9240 | <i>T. brucei</i> | 51  | 1    | 51   |
| Tbg972.9.9270 | <i>T. brucei</i> | 105 | 100  | 204  |
| Tbg972.9.930  | <i>T. brucei</i> | 56  | 344  | 399  |
| Tbg972.9.9310 | <i>T. brucei</i> | 46  | 1    | 46   |
| Tbg972.9.9310 | <i>T. brucei</i> | 258 | 73   | 330  |
| Tbg972.9.9320 | <i>T. brucei</i> | 92  | 1    | 92   |
| Tbg972.9.9320 | <i>T. brucei</i> | 124 | 128  | 251  |
| Tbg972.9.9360 | <i>T. brucei</i> | 44  | 89   | 132  |
| Tbg972.9.9360 | <i>T. brucei</i> | 44  | 407  | 450  |
| Tbg972.9.9360 | <i>T. brucei</i> | 44  | 407  | 450  |
| Tbg972.9.9370 | <i>T. brucei</i> | 73  | 236  | 308  |
| Tbg972.9.9390 | <i>T. brucei</i> | 73  | 236  | 308  |
| Tbg972.9.940  | <i>T. brucei</i> | 40  | 406  | 445  |
| Tbg972.9.940  | <i>T. brucei</i> | 42  | 747  | 788  |
| Tbg972.9.940  | <i>T. brucei</i> | 42  | 747  | 788  |
| Tbg972.9.9400 | <i>T. brucei</i> | 47  | 175  | 221  |
| Tbg972.9.9410 | <i>T. brucei</i> | 41  | 1    | 41   |
| Tbg972.9.9410 | <i>T. brucei</i> | 41  | 69   | 109  |
| Tbg972.9.9410 | <i>T. brucei</i> | 41  | 69   | 109  |
| Tbg972.9.9420 | <i>T. brucei</i> | 40  | 97   | 136  |
| Tbg972.9.9420 | <i>T. brucei</i> | 253 | 166  | 418  |
| Tbg972.9.9430 | <i>T. brucei</i> | 63  | 186  | 248  |
| Tbg972.9.9440 | <i>T. brucei</i> | 120 | 137  | 256  |
| Tbg972.9.9450 | <i>T. brucei</i> | 42  | 303  | 344  |
| Tbg972.9.9450 | <i>T. brucei</i> | 43  | 391  | 433  |
| Tbg972.9.9450 | <i>T. brucei</i> | 110 | 462  | 571  |
| Tbg972.9.9470 | <i>T. brucei</i> | 365 | 87   | 451  |
| Tbg972.9.9470 | <i>T. brucei</i> | 44  | 1171 | 1214 |
| Tbg972.9.950  | <i>T. brucei</i> | 104 | 43   | 146  |
| Tbg972.9.9500 | <i>T. brucei</i> | 76  | 466  | 541  |
| Tbg972.9.9500 | <i>T. brucei</i> | 45  | 622  | 666  |
| Tbg972.9.9500 | <i>T. brucei</i> | 44  | 817  | 860  |
| Tbg972.9.9520 | <i>T. brucei</i> | 115 | 136  | 250  |
| Tbg972.9.9540 | <i>T. brucei</i> | 56  | 40   | 95   |
| Tbg972.9.9560 | <i>T. brucei</i> | 47  | 2046 | 2092 |
| Tbg972.9.9560 | <i>T. brucei</i> | 68  | 2981 | 3048 |
| Tbg972.9.9560 | <i>T. brucei</i> | 68  | 2981 | 3048 |
| Tbg972.9.9570 | <i>T. brucei</i> | 67  | 1    | 67   |
| Tbg972.9.9580 | <i>T. brucei</i> | 180 | 31   | 210  |



|               |                  |     |      |      |
|---------------|------------------|-----|------|------|
| Tbg972.9.9590 | <i>T. brucei</i> | 60  | 982  | 1041 |
| Tbg972.9.960  | <i>T. brucei</i> | 63  | 58   | 120  |
| Tbg972.9.9600 | <i>T. brucei</i> | 160 | 468  | 627  |
| Tbg972.9.9620 | <i>T. brucei</i> | 250 | 128  | 377  |
| Tbg972.9.9640 | <i>T. brucei</i> | 51  | 61   | 111  |
| Tbg972.9.9640 | <i>T. brucei</i> | 85  | 197  | 281  |
| Tbg972.9.9650 | <i>T. brucei</i> | 64  | 51   | 114  |
| Tbg972.9.9650 | <i>T. brucei</i> | 93  | 152  | 244  |
| Tbg972.9.9650 | <i>T. brucei</i> | 93  | 152  | 244  |
| Tbg972.9.9660 | <i>T. brucei</i> | 56  | 62   | 117  |
| Tbg972.9.9660 | <i>T. brucei</i> | 99  | 148  | 246  |
| Tbg972.9.9660 | <i>T. brucei</i> | 99  | 148  | 246  |
| Tbg972.9.9670 | <i>T. brucei</i> | 64  | 51   | 114  |
| Tbg972.9.9670 | <i>T. brucei</i> | 95  | 152  | 246  |
| Tbg972.9.9670 | <i>T. brucei</i> | 95  | 152  | 246  |
| Tbg972.9.9680 | <i>T. brucei</i> | 55  | 62   | 116  |
| Tbg972.9.9680 | <i>T. brucei</i> | 98  | 148  | 245  |
| Tbg972.9.9680 | <i>T. brucei</i> | 98  | 148  | 245  |
| Tbg972.9.9690 | <i>T. brucei</i> | 69  | 51   | 119  |
| Tbg972.9.9690 | <i>T. brucei</i> | 48  | 128  | 175  |
| Tbg972.9.9690 | <i>T. brucei</i> | 48  | 128  | 175  |
| Tbg972.9.9700 | <i>T. brucei</i> | 64  | 51   | 114  |
| Tbg972.9.9700 | <i>T. brucei</i> | 95  | 152  | 246  |
| Tbg972.9.9700 | <i>T. brucei</i> | 95  | 152  | 246  |
| Tbg972.9.9710 | <i>T. brucei</i> | 55  | 32   | 86   |
| Tbg972.9.9710 | <i>T. brucei</i> | 104 | 169  | 272  |
| Tbg972.9.9720 | <i>T. brucei</i> | 56  | 62   | 117  |
| Tbg972.9.9720 | <i>T. brucei</i> | 99  | 148  | 246  |
| Tbg972.9.9720 | <i>T. brucei</i> | 99  | 148  | 246  |
| Tbg972.9.9730 | <i>T. brucei</i> | 41  | 64   | 104  |
| Tbg972.9.9740 | <i>T. brucei</i> | 64  | 51   | 114  |
| Tbg972.9.9740 | <i>T. brucei</i> | 85  | 152  | 236  |
| Tbg972.9.9740 | <i>T. brucei</i> | 85  | 152  | 236  |
| Tbg972.9.9760 | <i>T. brucei</i> | 40  | 61   | 100  |
| Tbg972.9.9760 | <i>T. brucei</i> | 56  | 205  | 260  |
| Tbg972.9.9760 | <i>T. brucei</i> | 56  | 205  | 260  |
| Tbg972.9.9770 | <i>T. brucei</i> | 86  | 237  | 322  |
| Tbg972.9.9780 | <i>T. brucei</i> | 63  | 33   | 95   |
| Tbg972.9.9790 | <i>T. brucei</i> | 43  | 1200 | 1242 |
| Tbg972.9.980  | <i>T. brucei</i> | 64  | 55   | 118  |
| Tbg972.9.980  | <i>T. brucei</i> | 108 | 191  | 298  |
| Tbg972.9.980  | <i>T. brucei</i> | 104 | 353  | 456  |
| Tbg972.9.9810 | <i>T. brucei</i> | 46  | 364  | 409  |
| Tbg972.9.9820 | <i>T. brucei</i> | 141 | 331  | 471  |
| Tbg972.9.9850 | <i>T. brucei</i> | 60  | 1    | 60   |
| Tbg972.9.9850 | <i>T. brucei</i> | 42  | 157  | 198  |
| Tbg972.9.9870 | <i>T. brucei</i> | 137 | 1    | 137  |

|                       |                  |     |     |     |
|-----------------------|------------------|-----|-----|-----|
| Tbg972.9.9870         | <i>T. brucei</i> | 49  | 184 | 232 |
| Tbg972.9.9900         | <i>T. brucei</i> | 42  | 298 | 339 |
| Tbg972.9.9920         | <i>T. brucei</i> | 42  | 1   | 42  |
| Tbg972.9.9920         | <i>T. brucei</i> | 68  | 82  | 149 |
| Tbg972.9.9920         | <i>T. brucei</i> | 68  | 82  | 149 |
| Tbg972.9.9940         | <i>T. brucei</i> | 65  | 159 | 223 |
| Tbg972.9.9950         | <i>T. brucei</i> | 133 | 1   | 133 |
| Tc00.1047053398345.10 | <i>T. cruzi</i>  | 59  | 355 | 413 |
| Tc00.1047053400945.10 | <i>T. cruzi</i>  | 47  | 1   | 47  |
| Tc00.1047053404001.10 | <i>T. cruzi</i>  | 244 | 15  | 258 |
| Tc00.1047053404001.4  | <i>T. cruzi</i>  | 74  | 1   | 74  |
| Tc00.1047053404001.4  | <i>T. cruzi</i>  | 382 | 197 | 578 |
| Tc00.1047053404843.10 | <i>T. cruzi</i>  | 45  | 76  | 120 |
| Tc00.1047053404843.20 | <i>T. cruzi</i>  | 45  | 174 | 218 |
| Tc00.1047053407477.40 | <i>T. cruzi</i>  | 49  | 137 | 185 |
| Tc00.1047053407477.60 | <i>T. cruzi</i>  | 51  | 260 | 310 |
| Tc00.1047053408437.29 | <i>T. cruzi</i>  | 102 | 1   | 102 |
| Tc00.1047053408437.29 | <i>T. cruzi</i>  | 50  | 265 | 314 |
| Tc00.1047053408437.29 | <i>T. cruzi</i>  | 50  | 335 | 384 |
| Tc00.1047053408437.29 | <i>T. cruzi</i>  | 128 | 549 | 676 |
| Tc00.1047053408547.10 | <i>T. cruzi</i>  | 321 | 29  | 349 |
| Tc00.1047053408573.9  | <i>T. cruzi</i>  | 130 | 137 | 266 |
| Tc00.1047053408573.9  | <i>T. cruzi</i>  | 76  | 438 | 513 |
| Tc00.1047053409117.20 | <i>T. cruzi</i>  | 51  | 94  | 144 |
| Tc00.1047053410243.10 | <i>T. cruzi</i>  | 124 | 1   | 124 |
| Tc00.1047053410589.19 | <i>T. cruzi</i>  | 184 | 14  | 197 |
| Tc00.1047053411427.30 | <i>T. cruzi</i>  | 98  | 1   | 98  |
| Tc00.1047053411427.30 | <i>T. cruzi</i>  | 73  | 197 | 269 |
| Tc00.1047053411427.30 | <i>T. cruzi</i>  | 47  | 350 | 396 |
| Tc00.1047053411427.40 | <i>T. cruzi</i>  | 116 | 1   | 116 |
| Tc00.1047053411427.40 | <i>T. cruzi</i>  | 55  | 173 | 227 |
| Tc00.1047053411427.40 | <i>T. cruzi</i>  | 55  | 173 | 227 |
| Tc00.1047053418613.20 | <i>T. cruzi</i>  | 193 | 73  | 265 |
| Tc00.1047053419703.10 | <i>T. cruzi</i>  | 48  | 1   | 48  |
| Tc00.1047053420293.20 | <i>T. cruzi</i>  | 44  | 1   | 44  |
| Tc00.1047053420293.31 | <i>T. cruzi</i>  | 79  | 120 | 198 |
| Tc00.1047053420369.40 | <i>T. cruzi</i>  | 96  | 179 | 274 |
| Tc00.1047053421173.4  | <i>T. cruzi</i>  | 44  | 1   | 44  |
| Tc00.1047053421173.4  | <i>T. cruzi</i>  | 112 | 707 | 818 |
| Tc00.1047053421619.10 | <i>T. cruzi</i>  | 133 | 1   | 133 |
| Tc00.1047053421619.10 | <i>T. cruzi</i>  | 100 | 145 | 244 |
| Tc00.1047053421619.10 | <i>T. cruzi</i>  | 49  | 251 | 299 |
| Tc00.1047053421619.10 | <i>T. cruzi</i>  | 167 | 304 | 470 |
| Tc00.1047053421959.10 | <i>T. cruzi</i>  | 72  | 1   | 72  |
| Tc00.1047053422041.9  | <i>T. cruzi</i>  | 102 | 112 | 213 |
| Tc00.1047053422041.9  | <i>T. cruzi</i>  | 131 | 220 | 350 |
| Tc00.1047053422319.10 | <i>T. cruzi</i>  | 213 | 15  | 227 |

|                       |                 |     |     |     |
|-----------------------|-----------------|-----|-----|-----|
| Tc00.1047053424195.9  | <i>T. cruzi</i> | 201 | 1   | 201 |
| Tc00.1047053425851.9  | <i>T. cruzi</i> | 44  | 57  | 100 |
| Tc00.1047053425851.9  | <i>T. cruzi</i> | 70  | 170 | 239 |
| Tc00.1047053425851.9  | <i>T. cruzi</i> | 43  | 308 | 350 |
| Tc00.1047053427247.4  | <i>T. cruzi</i> | 194 | 39  | 232 |
| Tc00.1047053427247.4  | <i>T. cruzi</i> | 62  | 260 | 321 |
| Tc00.1047053427247.4  | <i>T. cruzi</i> | 62  | 260 | 321 |
| Tc00.1047053428999.10 | <i>T. cruzi</i> | 97  | 541 | 637 |
| Tc00.1047053428999.10 | <i>T. cruzi</i> | 116 | 665 | 780 |
| Tc00.1047053428999.10 | <i>T. cruzi</i> | 69  | 803 | 871 |
| Tc00.1047053428999.10 | <i>T. cruzi</i> | 44  | 918 | 961 |
| Tc00.1047053429257.10 | <i>T. cruzi</i> | 113 | 1   | 113 |
| Tc00.1047053429257.10 | <i>T. cruzi</i> | 102 | 225 | 326 |
| Tc00.1047053430061.9  | <i>T. cruzi</i> | 84  | 1   | 84  |
| Tc00.1047053430061.9  | <i>T. cruzi</i> | 105 | 118 | 222 |
| Tc00.1047053430061.9  | <i>T. cruzi</i> | 57  | 257 | 313 |
| Tc00.1047053430605.10 | <i>T. cruzi</i> | 79  | 149 | 227 |
| Tc00.1047053430605.10 | <i>T. cruzi</i> | 117 | 279 | 395 |
| Tc00.1047053430605.10 | <i>T. cruzi</i> | 62  | 724 | 785 |
| Tc00.1047053430605.10 | <i>T. cruzi</i> | 164 | 833 | 996 |
| Tc00.1047053430605.40 | <i>T. cruzi</i> | 184 | 119 | 302 |
| Tc00.1047053434259.19 | <i>T. cruzi</i> | 50  | 1   | 50  |
| Tc00.1047053434931.20 | <i>T. cruzi</i> | 50  | 1   | 50  |
| Tc00.1047053434931.20 | <i>T. cruzi</i> | 64  | 88  | 151 |
| Tc00.1047053434931.20 | <i>T. cruzi</i> | 42  | 182 | 223 |
| Tc00.1047053436535.10 | <i>T. cruzi</i> | 61  | 1   | 61  |
| Tc00.1047053437121.9  | <i>T. cruzi</i> | 44  | 540 | 583 |
| Tc00.1047053438923.10 | <i>T. cruzi</i> | 442 | 34  | 475 |
| Tc00.1047053439245.10 | <i>T. cruzi</i> | 126 | 27  | 152 |
| Tc00.1047053439307.9  | <i>T. cruzi</i> | 41  | 74  | 114 |
| Tc00.1047053442383.19 | <i>T. cruzi</i> | 66  | 1   | 66  |
| Tc00.1047053442383.19 | <i>T. cruzi</i> | 61  | 154 | 214 |
| Tc00.1047053442383.19 | <i>T. cruzi</i> | 61  | 154 | 214 |
| Tc00.1047053445011.19 | <i>T. cruzi</i> | 114 | 172 | 285 |
| Tc00.1047053445553.10 | <i>T. cruzi</i> | 41  | 1   | 41  |
| Tc00.1047053445553.10 | <i>T. cruzi</i> | 56  | 145 | 200 |
| Tc00.1047053445553.10 | <i>T. cruzi</i> | 230 | 285 | 514 |
| Tc00.1047053449247.10 | <i>T. cruzi</i> | 43  | 110 | 152 |
| Tc00.1047053450155.9  | <i>T. cruzi</i> | 47  | 45  | 91  |
| Tc00.1047053450155.9  | <i>T. cruzi</i> | 89  | 198 | 286 |
| Tc00.1047053453917.9  | <i>T. cruzi</i> | 295 | 1   | 295 |
| Tc00.1047053453917.9  | <i>T. cruzi</i> | 61  | 301 | 361 |
| Tc00.1047053456097.10 | <i>T. cruzi</i> | 67  | 1   | 67  |
| Tc00.1047053458015.10 | <i>T. cruzi</i> | 46  | 170 | 215 |
| Tc00.1047053458015.10 | <i>T. cruzi</i> | 224 | 278 | 501 |
| Tc00.1047053458153.10 | <i>T. cruzi</i> | 192 | 1   | 192 |
| Tc00.1047053458153.10 | <i>T. cruzi</i> | 59  | 244 | 302 |

|                       |                 |     |      |      |
|-----------------------|-----------------|-----|------|------|
| Tc00.1047053459793.10 | <i>T. cruzi</i> | 85  | 22   | 106  |
| Tc00.1047053460061.10 | <i>T. cruzi</i> | 141 | 1    | 141  |
| Tc00.1047053460061.20 | <i>T. cruzi</i> | 43  | 1    | 43   |
| Tc00.1047053461165.4  | <i>T. cruzi</i> | 109 | 1    | 109  |
| Tc00.1047053461515.10 | <i>T. cruzi</i> | 429 | 24   | 452  |
| Tc00.1047053463155.20 | <i>T. cruzi</i> | 41  | 77   | 117  |
| Tc00.1047053463297.10 | <i>T. cruzi</i> | 178 | 1    | 178  |
| Tc00.1047053464807.20 | <i>T. cruzi</i> | 63  | 135  | 197  |
| Tc00.1047053464807.20 | <i>T. cruzi</i> | 65  | 366  | 430  |
| Tc00.1047053464807.20 | <i>T. cruzi</i> | 65  | 366  | 430  |
| Tc00.1047053468217.14 | <i>T. cruzi</i> | 398 | 29   | 426  |
| Tc00.1047053469435.10 | <i>T. cruzi</i> | 61  | 137  | 197  |
| Tc00.1047053469785.10 | <i>T. cruzi</i> | 53  | 440  | 492  |
| Tc00.1047053469785.20 | <i>T. cruzi</i> | 65  | 43   | 107  |
| Tc00.1047053469785.20 | <i>T. cruzi</i> | 152 | 109  | 260  |
| Tc00.1047053469785.30 | <i>T. cruzi</i> | 47  | 251  | 297  |
| Tc00.1047053469785.40 | <i>T. cruzi</i> | 43  | 170  | 212  |
| Tc00.1047053474341.9  | <i>T. cruzi</i> | 40  | 336  | 375  |
| Tc00.1047053476421.9  | <i>T. cruzi</i> | 43  | 98   | 140  |
| Tc00.1047053476421.9  | <i>T. cruzi</i> | 140 | 399  | 538  |
| Tc00.1047053476421.9  | <i>T. cruzi</i> | 140 | 399  | 538  |
| Tc00.1047053479253.9  | <i>T. cruzi</i> | 45  | 1    | 45   |
| Tc00.1047053482369.20 | <i>T. cruzi</i> | 59  | 140  | 198  |
| Tc00.1047053482369.20 | <i>T. cruzi</i> | 64  | 595  | 658  |
| Tc00.1047053482369.20 | <i>T. cruzi</i> | 42  | 883  | 924  |
| Tc00.1047053482369.20 | <i>T. cruzi</i> | 57  | 1046 | 1102 |
| Tc00.1047053482369.29 | <i>T. cruzi</i> | 40  | 139  | 178  |
| Tc00.1047053483623.10 | <i>T. cruzi</i> | 84  | 151  | 234  |
| Tc00.1047053483813.10 | <i>T. cruzi</i> | 92  | 1    | 92   |
| Tc00.1047053483813.10 | <i>T. cruzi</i> | 43  | 130  | 172  |
| Tc00.1047053483813.10 | <i>T. cruzi</i> | 43  | 130  | 172  |
| Tc00.1047053485889.10 | <i>T. cruzi</i> | 60  | 1    | 60   |
| Tc00.1047053485889.10 | <i>T. cruzi</i> | 125 | 144  | 268  |
| Tc00.1047053485889.10 | <i>T. cruzi</i> | 202 | 275  | 476  |
| Tc00.1047053485889.10 | <i>T. cruzi</i> | 117 | 517  | 633  |
| Tc00.1047053485889.10 | <i>T. cruzi</i> | 236 | 678  | 913  |
| Tc00.1047053485889.16 | <i>T. cruzi</i> | 84  | 46   | 129  |
| Tc00.1047053498829.10 | <i>T. cruzi</i> | 178 | 33   | 210  |
| Tc00.1047053503391.10 | <i>T. cruzi</i> | 56  | 1    | 56   |
| Tc00.1047053503391.10 | <i>T. cruzi</i> | 42  | 95   | 136  |
| Tc00.1047053503391.10 | <i>T. cruzi</i> | 42  | 95   | 136  |
| Tc00.1047053503393.10 | <i>T. cruzi</i> | 44  | 21   | 64   |
| Tc00.1047053503401.20 | <i>T. cruzi</i> | 71  | 243  | 313  |
| Tc00.1047053503407.10 | <i>T. cruzi</i> | 110 | 1    | 110  |
| Tc00.1047053503407.20 | <i>T. cruzi</i> | 281 | 22   | 302  |
| Tc00.1047053503407.20 | <i>T. cruzi</i> | 40  | 318  | 357  |
| Tc00.1047053503409.10 | <i>T. cruzi</i> | 44  | 1    | 44   |

|                        |                 |     |     |     |
|------------------------|-----------------|-----|-----|-----|
| Tc00.1047053503409.10  | <i>T. cruzi</i> | 55  | 224 | 278 |
| Tc00.1047053503409.10  | <i>T. cruzi</i> | 75  | 416 | 490 |
| Tc00.1047053503409.10  | <i>T. cruzi</i> | 131 | 494 | 624 |
| Tc00.1047053503409.20  | <i>T. cruzi</i> | 52  | 1   | 52  |
| Tc00.1047053503409.20  | <i>T. cruzi</i> | 46  | 54  | 99  |
| Tc00.1047053503409.20  | <i>T. cruzi</i> | 80  | 153 | 232 |
| Tc00.1047053503409.20  | <i>T. cruzi</i> | 67  | 366 | 432 |
| Tc00.1047053503419.10  | <i>T. cruzi</i> | 128 | 1   | 128 |
| Tc00.1047053503419.10  | <i>T. cruzi</i> | 63  | 166 | 228 |
| Tc00.1047053503419.10  | <i>T. cruzi</i> | 47  | 263 | 309 |
| Tc00.1047053503419.20  | <i>T. cruzi</i> | 103 | 333 | 435 |
| Tc00.1047053503419.50  | <i>T. cruzi</i> | 189 | 12  | 200 |
| Tc00.1047053503419.50  | <i>T. cruzi</i> | 66  | 284 | 349 |
| Tc00.1047053503419.60  | <i>T. cruzi</i> | 118 | 110 | 227 |
| Tc00.1047053503419.60  | <i>T. cruzi</i> | 62  | 488 | 549 |
| Tc00.1047053503433.20  | <i>T. cruzi</i> | 66  | 198 | 263 |
| Tc00.1047053503433.20  | <i>T. cruzi</i> | 76  | 279 | 354 |
| Tc00.1047053503433.20  | <i>T. cruzi</i> | 90  | 420 | 509 |
| Tc00.1047053503435.14  | <i>T. cruzi</i> | 44  | 1   | 44  |
| Tc00.1047053503435.14  | <i>T. cruzi</i> | 112 | 238 | 349 |
| Tc00.1047053503435.14  | <i>T. cruzi</i> | 81  | 366 | 446 |
| Tc00.1047053503435.14  | <i>T. cruzi</i> | 48  | 539 | 586 |
| Tc00.1047053503435.30  | <i>T. cruzi</i> | 150 | 1   | 150 |
| Tc00.1047053503435.30  | <i>T. cruzi</i> | 77  | 193 | 269 |
| Tc00.1047053503435.30  | <i>T. cruzi</i> | 257 | 462 | 718 |
| Tc00.1047053503441.5   | <i>T. cruzi</i> | 42  | 1   | 42  |
| Tc00.1047053503447.20  | <i>T. cruzi</i> | 43  | 1   | 43  |
| Tc00.1047053503447.50  | <i>T. cruzi</i> | 43  | 1   | 43  |
| Tc00.1047053503447.50  | <i>T. cruzi</i> | 180 | 681 | 860 |
| Tc00.1047053503447.60  | <i>T. cruzi</i> | 56  | 100 | 155 |
| Tc00.1047053503449.14  | <i>T. cruzi</i> | 74  | 1   | 74  |
| Tc00.1047053503449.30  | <i>T. cruzi</i> | 145 | 278 | 422 |
| Tc00.1047053503449.40  | <i>T. cruzi</i> | 84  | 38  | 121 |
| Tc00.1047053503449.40  | <i>T. cruzi</i> | 79  | 134 | 212 |
| Tc00.1047053503449.40  | <i>T. cruzi</i> | 152 | 372 | 523 |
| Tc00.1047053503449.40  | <i>T. cruzi</i> | 40  | 549 | 588 |
| Tc00.1047053503453.10  | <i>T. cruzi</i> | 108 | 158 | 265 |
| Tc00.1047053503453.100 | <i>T. cruzi</i> | 56  | 27  | 82  |
| Tc00.1047053503453.20  | <i>T. cruzi</i> | 124 | 88  | 211 |
| Tc00.1047053503453.20  | <i>T. cruzi</i> | 52  | 308 | 359 |
| Tc00.1047053503453.20  | <i>T. cruzi</i> | 52  | 308 | 359 |
| Tc00.1047053503453.50  | <i>T. cruzi</i> | 68  | 308 | 375 |
| Tc00.1047053503453.50  | <i>T. cruzi</i> | 40  | 465 | 504 |
| Tc00.1047053503453.50  | <i>T. cruzi</i> | 56  | 594 | 649 |
| Tc00.1047053503453.60  | <i>T. cruzi</i> | 60  | 187 | 246 |
| Tc00.1047053503453.70  | <i>T. cruzi</i> | 761 | 15  | 775 |
| Tc00.1047053503453.80  | <i>T. cruzi</i> | 88  | 28  | 115 |

|                       |                 |     |      |      |
|-----------------------|-----------------|-----|------|------|
| Tc00.1047053503453.80 | <i>T. cruzi</i> | 130 | 147  | 276  |
| Tc00.1047053503453.80 | <i>T. cruzi</i> | 41  | 310  | 350  |
| Tc00.1047053503453.90 | <i>T. cruzi</i> | 47  | 74   | 120  |
| Tc00.1047053503455.10 | <i>T. cruzi</i> | 323 | 108  | 430  |
| Tc00.1047053503455.10 | <i>T. cruzi</i> | 80  | 533  | 612  |
| Tc00.1047053503455.30 | <i>T. cruzi</i> | 168 | 1    | 168  |
| Tc00.1047053503455.30 | <i>T. cruzi</i> | 145 | 192  | 336  |
| Tc00.1047053503455.30 | <i>T. cruzi</i> | 67  | 480  | 546  |
| Tc00.1047053503455.30 | <i>T. cruzi</i> | 47  | 800  | 846  |
| Tc00.1047053503455.30 | <i>T. cruzi</i> | 53  | 1044 | 1096 |
| Tc00.1047053503455.30 | <i>T. cruzi</i> | 72  | 1168 | 1239 |
| Tc00.1047053503457.10 | <i>T. cruzi</i> | 127 | 18   | 144  |
| Tc00.1047053503467.20 | <i>T. cruzi</i> | 78  | 36   | 113  |
| Tc00.1047053503467.20 | <i>T. cruzi</i> | 79  | 131  | 209  |
| Tc00.1047053503467.20 | <i>T. cruzi</i> | 78  | 405  | 482  |
| Tc00.1047053503477.10 | <i>T. cruzi</i> | 54  | 1    | 54   |
| Tc00.1047053503477.10 | <i>T. cruzi</i> | 163 | 77   | 239  |
| Tc00.1047053503477.20 | <i>T. cruzi</i> | 73  | 259  | 331  |
| Tc00.1047053503477.30 | <i>T. cruzi</i> | 57  | 449  | 505  |
| Tc00.1047053503479.20 | <i>T. cruzi</i> | 59  | 1    | 59   |
| Tc00.1047053503479.40 | <i>T. cruzi</i> | 56  | 1    | 56   |
| Tc00.1047053503479.40 | <i>T. cruzi</i> | 125 | 372  | 496  |
| Tc00.1047053503479.40 | <i>T. cruzi</i> | 446 | 610  | 1055 |
| Tc00.1047053503479.40 | <i>T. cruzi</i> | 62  | 1124 | 1185 |
| Tc00.1047053503479.70 | <i>T. cruzi</i> | 94  | 370  | 463  |
| Tc00.1047053503479.70 | <i>T. cruzi</i> | 167 | 486  | 652  |
| Tc00.1047053503479.70 | <i>T. cruzi</i> | 232 | 754  | 985  |
| Tc00.1047053503479.70 | <i>T. cruzi</i> | 108 | 1088 | 1195 |
| Tc00.1047053503483.9  | <i>T. cruzi</i> | 58  | 28   | 85   |
| Tc00.1047053503483.9  | <i>T. cruzi</i> | 40  | 378  | 417  |
| Tc00.1047053503487.20 | <i>T. cruzi</i> | 142 | 67   | 208  |
| Tc00.1047053503487.20 | <i>T. cruzi</i> | 59  | 223  | 281  |
| Tc00.1047053503487.20 | <i>T. cruzi</i> | 402 | 297  | 698  |
| Tc00.1047053503487.30 | <i>T. cruzi</i> | 176 | 32   | 207  |
| Tc00.1047053503487.40 | <i>T. cruzi</i> | 40  | 645  | 684  |
| Tc00.1047053503487.60 | <i>T. cruzi</i> | 207 | 1    | 207  |
| Tc00.1047053503487.70 | <i>T. cruzi</i> | 79  | 50   | 128  |
| Tc00.1047053503489.30 | <i>T. cruzi</i> | 63  | 1    | 63   |
| Tc00.1047053503489.30 | <i>T. cruzi</i> | 58  | 69   | 126  |
| Tc00.1047053503489.30 | <i>T. cruzi</i> | 53  | 292  | 344  |
| Tc00.1047053503493.20 | <i>T. cruzi</i> | 63  | 153  | 215  |
| Tc00.1047053503493.20 | <i>T. cruzi</i> | 65  | 355  | 419  |
| Tc00.1047053503493.20 | <i>T. cruzi</i> | 65  | 355  | 419  |
| Tc00.1047053503493.30 | <i>T. cruzi</i> | 42  | 80   | 121  |
| Tc00.1047053503493.30 | <i>T. cruzi</i> | 173 | 295  | 467  |
| Tc00.1047053503493.30 | <i>T. cruzi</i> | 72  | 469  | 540  |
| Tc00.1047053503493.40 | <i>T. cruzi</i> | 81  | 1    | 81   |

|                       |                 |     |     |     |
|-----------------------|-----------------|-----|-----|-----|
| Tc00.1047053503493.40 | <i>T. cruzi</i> | 61  | 83  | 143 |
| Tc00.1047053503493.40 | <i>T. cruzi</i> | 66  | 220 | 285 |
| Tc00.1047053503493.40 | <i>T. cruzi</i> | 49  | 296 | 344 |
| Tc00.1047053503501.14 | <i>T. cruzi</i> | 189 | 1   | 189 |
| Tc00.1047053503501.7  | <i>T. cruzi</i> | 48  | 73  | 120 |
| Tc00.1047053503503.30 | <i>T. cruzi</i> | 174 | 27  | 200 |
| Tc00.1047053503503.40 | <i>T. cruzi</i> | 231 | 30  | 260 |
| Tc00.1047053503509.10 | <i>T. cruzi</i> | 77  | 47  | 123 |
| Tc00.1047053503509.10 | <i>T. cruzi</i> | 57  | 230 | 286 |
| Tc00.1047053503509.10 | <i>T. cruzi</i> | 78  | 448 | 525 |
| Tc00.1047053503509.10 | <i>T. cruzi</i> | 53  | 560 | 612 |
| Tc00.1047053503509.10 | <i>T. cruzi</i> | 51  | 710 | 760 |
| Tc00.1047053503511.10 | <i>T. cruzi</i> | 40  | 197 | 236 |
| Tc00.1047053503513.10 | <i>T. cruzi</i> | 63  | 1   | 63  |
| Tc00.1047053503513.20 | <i>T. cruzi</i> | 65  | 338 | 402 |
| Tc00.1047053503513.20 | <i>T. cruzi</i> | 74  | 513 | 586 |
| Tc00.1047053503513.20 | <i>T. cruzi</i> | 54  | 623 | 676 |
| Tc00.1047053503513.20 | <i>T. cruzi</i> | 77  | 791 | 867 |
| Tc00.1047053503513.20 | <i>T. cruzi</i> | 70  | 886 | 955 |
| Tc00.1047053503513.40 | <i>T. cruzi</i> | 61  | 105 | 165 |
| Tc00.1047053503513.40 | <i>T. cruzi</i> | 50  | 178 | 227 |
| Tc00.1047053503515.14 | <i>T. cruzi</i> | 131 | 1   | 131 |
| Tc00.1047053503515.20 | <i>T. cruzi</i> | 56  | 49  | 104 |
| Tc00.1047053503515.20 | <i>T. cruzi</i> | 57  | 125 | 181 |
| Tc00.1047053503515.20 | <i>T. cruzi</i> | 41  | 184 | 224 |
| Tc00.1047053503515.20 | <i>T. cruzi</i> | 108 | 252 | 359 |
| Tc00.1047053503515.20 | <i>T. cruzi</i> | 213 | 373 | 585 |
| Tc00.1047053503515.20 | <i>T. cruzi</i> | 95  | 589 | 683 |
| Tc00.1047053503515.7  | <i>T. cruzi</i> | 46  | 129 | 174 |
| Tc00.1047053503525.20 | <i>T. cruzi</i> | 274 | 329 | 602 |
| Tc00.1047053503525.30 | <i>T. cruzi</i> | 143 | 188 | 330 |
| Tc00.1047053503525.4  | <i>T. cruzi</i> | 98  | 220 | 317 |
| Tc00.1047053503525.4  | <i>T. cruzi</i> | 75  | 355 | 429 |
| Tc00.1047053503525.4  | <i>T. cruzi</i> | 75  | 355 | 429 |
| Tc00.1047053503525.40 | <i>T. cruzi</i> | 50  | 303 | 352 |
| Tc00.1047053503527.50 | <i>T. cruzi</i> | 54  | 138 | 191 |
| Tc00.1047053503529.20 | <i>T. cruzi</i> | 40  | 363 | 402 |
| Tc00.1047053503529.20 | <i>T. cruzi</i> | 65  | 463 | 527 |
| Tc00.1047053503529.30 | <i>T. cruzi</i> | 113 | 18  | 130 |
| Tc00.1047053503529.30 | <i>T. cruzi</i> | 61  | 212 | 272 |
| Tc00.1047053503529.30 | <i>T. cruzi</i> | 150 | 278 | 427 |
| Tc00.1047053503531.40 | <i>T. cruzi</i> | 90  | 111 | 200 |
| Tc00.1047053503531.49 | <i>T. cruzi</i> | 52  | 169 | 220 |
| Tc00.1047053503551.20 | <i>T. cruzi</i> | 44  | 85  | 128 |
| Tc00.1047053503551.20 | <i>T. cruzi</i> | 49  | 416 | 464 |
| Tc00.1047053503551.20 | <i>T. cruzi</i> | 148 | 635 | 782 |
| Tc00.1047053503557.30 | <i>T. cruzi</i> | 368 | 1   | 368 |

|                        |                 |     |     |     |
|------------------------|-----------------|-----|-----|-----|
| Tc00.1047053503561.10  | <i>T. cruzi</i> | 157 | 1   | 157 |
| Tc00.1047053503561.10  | <i>T. cruzi</i> | 196 | 163 | 358 |
| Tc00.1047053503571.10  | <i>T. cruzi</i> | 46  | 56  | 101 |
| Tc00.1047053503571.10  | <i>T. cruzi</i> | 51  | 341 | 391 |
| Tc00.1047053503571.10  | <i>T. cruzi</i> | 51  | 341 | 391 |
| Tc00.1047053503575.27  | <i>T. cruzi</i> | 44  | 1   | 44  |
| Tc00.1047053503575.27  | <i>T. cruzi</i> | 126 | 63  | 188 |
| Tc00.1047053503575.40  | <i>T. cruzi</i> | 72  | 83  | 154 |
| Tc00.1047053503575.50  | <i>T. cruzi</i> | 43  | 1   | 43  |
| Tc00.1047053503575.54  | <i>T. cruzi</i> | 45  | 41  | 85  |
| Tc00.1047053503575.60  | <i>T. cruzi</i> | 44  | 329 | 372 |
| Tc00.1047053503577.20  | <i>T. cruzi</i> | 68  | 166 | 233 |
| Tc00.1047053503579.110 | <i>T. cruzi</i> | 146 | 510 | 655 |
| Tc00.1047053503579.140 | <i>T. cruzi</i> | 52  | 175 | 226 |
| Tc00.1047053503579.150 | <i>T. cruzi</i> | 44  | 50  | 93  |
| Tc00.1047053503579.30  | <i>T. cruzi</i> | 97  | 1   | 97  |
| Tc00.1047053503579.30  | <i>T. cruzi</i> | 44  | 160 | 203 |
| Tc00.1047053503579.40  | <i>T. cruzi</i> | 54  | 345 | 398 |
| Tc00.1047053503579.50  | <i>T. cruzi</i> | 54  | 879 | 932 |
| Tc00.1047053503579.60  | <i>T. cruzi</i> | 117 | 214 | 330 |
| Tc00.1047053503579.90  | <i>T. cruzi</i> | 109 | 33  | 141 |
| Tc00.1047053503595.10  | <i>T. cruzi</i> | 72  | 145 | 216 |
| Tc00.1047053503595.10  | <i>T. cruzi</i> | 119 | 266 | 384 |
| Tc00.1047053503595.10  | <i>T. cruzi</i> | 168 | 398 | 565 |
| Tc00.1047053503595.10  | <i>T. cruzi</i> | 85  | 600 | 684 |
| Tc00.1047053503595.19  | <i>T. cruzi</i> | 124 | 38  | 161 |
| Tc00.1047053503599.10  | <i>T. cruzi</i> | 71  | 329 | 399 |
| Tc00.1047053503599.10  | <i>T. cruzi</i> | 90  | 413 | 502 |
| Tc00.1047053503599.20  | <i>T. cruzi</i> | 244 | 1   | 244 |
| Tc00.1047053503599.30  | <i>T. cruzi</i> | 103 | 30  | 132 |
| Tc00.1047053503599.30  | <i>T. cruzi</i> | 105 | 334 | 438 |
| Tc00.1047053503599.40  | <i>T. cruzi</i> | 691 | 1   | 691 |
| Tc00.1047053503599.40  | <i>T. cruzi</i> | 58  | 705 | 762 |
| Tc00.1047053503599.40  | <i>T. cruzi</i> | 183 | 814 | 996 |
| Tc00.1047053503599.50  | <i>T. cruzi</i> | 328 | 39  | 366 |
| Tc00.1047053503599.60  | <i>T. cruzi</i> | 78  | 26  | 103 |
| Tc00.1047053503601.10  | <i>T. cruzi</i> | 46  | 1   | 46  |
| Tc00.1047053503601.10  | <i>T. cruzi</i> | 46  | 716 | 761 |
| Tc00.1047053503601.10  | <i>T. cruzi</i> | 46  | 716 | 761 |
| Tc00.1047053503601.20  | <i>T. cruzi</i> | 105 | 59  | 163 |
| Tc00.1047053503611.10  | <i>T. cruzi</i> | 109 | 70  | 178 |
| Tc00.1047053503611.10  | <i>T. cruzi</i> | 75  | 216 | 290 |
| Tc00.1047053503611.10  | <i>T. cruzi</i> | 44  | 337 | 380 |
| Tc00.1047053503611.20  | <i>T. cruzi</i> | 78  | 48  | 125 |
| Tc00.1047053503611.40  | <i>T. cruzi</i> | 78  | 48  | 125 |
| Tc00.1047053503611.50  | <i>T. cruzi</i> | 45  | 105 | 149 |
| Tc00.1047053503611.50  | <i>T. cruzi</i> | 72  | 235 | 306 |



|                       |                 |     |      |      |
|-----------------------|-----------------|-----|------|------|
| Tc00.1047053503611.50 | <i>T. cruzi</i> | 72  | 235  | 306  |
| Tc00.1047053503613.10 | <i>T. cruzi</i> | 170 | 1    | 170  |
| Tc00.1047053503613.10 | <i>T. cruzi</i> | 47  | 485  | 531  |
| Tc00.1047053503613.10 | <i>T. cruzi</i> | 62  | 639  | 700  |
| Tc00.1047053503613.30 | <i>T. cruzi</i> | 55  | 1    | 55   |
| Tc00.1047053503613.70 | <i>T. cruzi</i> | 41  | 1    | 41   |
| Tc00.1047053503619.20 | <i>T. cruzi</i> | 63  | 315  | 377  |
| Tc00.1047053503619.29 | <i>T. cruzi</i> | 49  | 65   | 113  |
| Tc00.1047053503627.20 | <i>T. cruzi</i> | 72  | 1    | 72   |
| Tc00.1047053503627.20 | <i>T. cruzi</i> | 495 | 109  | 603  |
| Tc00.1047053503627.20 | <i>T. cruzi</i> | 95  | 834  | 928  |
| Tc00.1047053503627.20 | <i>T. cruzi</i> | 161 | 953  | 1113 |
| Tc00.1047053503627.20 | <i>T. cruzi</i> | 96  | 1481 | 1576 |
| Tc00.1047053503627.9  | <i>T. cruzi</i> | 118 | 16   | 133  |
| Tc00.1047053503637.20 | <i>T. cruzi</i> | 45  | 47   | 91   |
| Tc00.1047053503637.20 | <i>T. cruzi</i> | 68  | 180  | 247  |
| Tc00.1047053503637.20 | <i>T. cruzi</i> | 104 | 833  | 936  |
| Tc00.1047053503637.30 | <i>T. cruzi</i> | 42  | 67   | 108  |
| Tc00.1047053503639.20 | <i>T. cruzi</i> | 127 | 1    | 127  |
| Tc00.1047053503639.20 | <i>T. cruzi</i> | 42  | 175  | 216  |
| Tc00.1047053503639.20 | <i>T. cruzi</i> | 59  | 253  | 311  |
| Tc00.1047053503639.30 | <i>T. cruzi</i> | 53  | 659  | 711  |
| Tc00.1047053503641.10 | <i>T. cruzi</i> | 40  | 554  | 593  |
| Tc00.1047053503641.19 | <i>T. cruzi</i> | 68  | 93   | 160  |
| Tc00.1047053503643.10 | <i>T. cruzi</i> | 52  | 52   | 103  |
| Tc00.1047053503643.10 | <i>T. cruzi</i> | 44  | 464  | 507  |
| Tc00.1047053503643.10 | <i>T. cruzi</i> | 40  | 703  | 742  |
| Tc00.1047053503643.20 | <i>T. cruzi</i> | 49  | 76   | 124  |
| Tc00.1047053503643.20 | <i>T. cruzi</i> | 68  | 788  | 855  |
| Tc00.1047053503643.20 | <i>T. cruzi</i> | 225 | 937  | 1161 |
| Tc00.1047053503643.20 | <i>T. cruzi</i> | 86  | 1171 | 1256 |
| Tc00.1047053503643.20 | <i>T. cruzi</i> | 67  | 1327 | 1393 |
| Tc00.1047053503643.30 | <i>T. cruzi</i> | 166 | 1    | 166  |
| Tc00.1047053503643.6  | <i>T. cruzi</i> | 183 | 115  | 297  |
| Tc00.1047053503643.6  | <i>T. cruzi</i> | 70  | 398  | 467  |
| Tc00.1047053503643.6  | <i>T. cruzi</i> | 70  | 398  | 467  |
| Tc00.1047053503651.10 | <i>T. cruzi</i> | 267 | 196  | 462  |
| Tc00.1047053503651.4  | <i>T. cruzi</i> | 50  | 1    | 50   |
| Tc00.1047053503651.4  | <i>T. cruzi</i> | 44  | 76   | 119  |
| Tc00.1047053503651.4  | <i>T. cruzi</i> | 43  | 361  | 403  |
| Tc00.1047053503651.40 | <i>T. cruzi</i> | 190 | 1    | 190  |
| Tc00.1047053503653.20 | <i>T. cruzi</i> | 48  | 1    | 48   |
| Tc00.1047053503653.20 | <i>T. cruzi</i> | 44  | 73   | 116  |
| Tc00.1047053503653.20 | <i>T. cruzi</i> | 44  | 73   | 116  |
| Tc00.1047053503653.30 | <i>T. cruzi</i> | 47  | 164  | 210  |
| Tc00.1047053503653.50 | <i>T. cruzi</i> | 70  | 43   | 112  |
| Tc00.1047053503653.50 | <i>T. cruzi</i> | 176 | 329  | 504  |

|                        |                 |     |      |      |
|------------------------|-----------------|-----|------|------|
| Tc00.1047053503653.60  | <i>T. cruzi</i> | 50  | 233  | 282  |
| Tc00.1047053503653.90  | <i>T. cruzi</i> | 43  | 54   | 96   |
| Tc00.1047053503653.90  | <i>T. cruzi</i> | 40  | 170  | 209  |
| Tc00.1047053503653.90  | <i>T. cruzi</i> | 45  | 348  | 392  |
| Tc00.1047053503665.30  | <i>T. cruzi</i> | 302 | 31   | 332  |
| Tc00.1047053503667.20  | <i>T. cruzi</i> | 70  | 81   | 150  |
| Tc00.1047053503669.10  | <i>T. cruzi</i> | 127 | 207  | 333  |
| Tc00.1047053503669.10  | <i>T. cruzi</i> | 137 | 363  | 499  |
| Tc00.1047053503669.10  | <i>T. cruzi</i> | 137 | 363  | 499  |
| Tc00.1047053503669.30  | <i>T. cruzi</i> | 186 | 1    | 186  |
| Tc00.1047053503671.20  | <i>T. cruzi</i> | 46  | 160  | 205  |
| Tc00.1047053503671.30  | <i>T. cruzi</i> | 70  | 196  | 265  |
| Tc00.1047053503675.10  | <i>T. cruzi</i> | 51  | 1    | 51   |
| Tc00.1047053503675.10  | <i>T. cruzi</i> | 59  | 247  | 305  |
| Tc00.1047053503675.10  | <i>T. cruzi</i> | 59  | 247  | 305  |
| Tc00.1047053503675.20  | <i>T. cruzi</i> | 58  | 1    | 58   |
| Tc00.1047053503675.20  | <i>T. cruzi</i> | 134 | 85   | 218  |
| Tc00.1047053503675.20  | <i>T. cruzi</i> | 134 | 85   | 218  |
| Tc00.1047053503675.40  | <i>T. cruzi</i> | 86  | 275  | 360  |
| Tc00.1047053503677.20  | <i>T. cruzi</i> | 93  | 37   | 129  |
| Tc00.1047053503677.20  | <i>T. cruzi</i> | 40  | 793  | 832  |
| Tc00.1047053503677.20  | <i>T. cruzi</i> | 40  | 793  | 832  |
| Tc00.1047053503677.29  | <i>T. cruzi</i> | 368 | 25   | 392  |
| Tc00.1047053503677.29  | <i>T. cruzi</i> | 61  | 433  | 493  |
| Tc00.1047053503683.11  | <i>T. cruzi</i> | 273 | 197  | 469  |
| Tc00.1047053503683.20  | <i>T. cruzi</i> | 155 | 23   | 177  |
| Tc00.1047053503683.20  | <i>T. cruzi</i> | 84  | 250  | 333  |
| Tc00.1047053503683.20  | <i>T. cruzi</i> | 115 | 344  | 458  |
| Tc00.1047053503685.10  | <i>T. cruzi</i> | 108 | 1    | 108  |
| Tc00.1047053503685.5   | <i>T. cruzi</i> | 60  | 1    | 60   |
| Tc00.1047053503689.30  | <i>T. cruzi</i> | 366 | 1    | 366  |
| Tc00.1047053503689.34  | <i>T. cruzi</i> | 95  | 53   | 147  |
| Tc00.1047053503689.4   | <i>T. cruzi</i> | 41  | 179  | 219  |
| Tc00.1047053503697.100 | <i>T. cruzi</i> | 40  | 32   | 71   |
| Tc00.1047053503697.100 | <i>T. cruzi</i> | 179 | 162  | 340  |
| Tc00.1047053503697.100 | <i>T. cruzi</i> | 42  | 397  | 438  |
| Tc00.1047053503697.100 | <i>T. cruzi</i> | 62  | 486  | 547  |
| Tc00.1047053503697.100 | <i>T. cruzi</i> | 72  | 1124 | 1195 |
| Tc00.1047053503697.100 | <i>T. cruzi</i> | 69  | 1381 | 1449 |
| Tc00.1047053503697.100 | <i>T. cruzi</i> | 95  | 1682 | 1776 |
| Tc00.1047053503697.110 | <i>T. cruzi</i> | 92  | 267  | 358  |
| Tc00.1047053503697.120 | <i>T. cruzi</i> | 371 | 1    | 371  |
| Tc00.1047053503697.120 | <i>T. cruzi</i> | 111 | 393  | 503  |
| Tc00.1047053503697.130 | <i>T. cruzi</i> | 49  | 1    | 49   |
| Tc00.1047053503697.130 | <i>T. cruzi</i> | 240 | 83   | 322  |
| Tc00.1047053503697.130 | <i>T. cruzi</i> | 53  | 355  | 407  |
| Tc00.1047053503697.130 | <i>T. cruzi</i> | 201 | 438  | 638  |

|                        |                 |     |      |      |
|------------------------|-----------------|-----|------|------|
| Tc00.1047053503697.130 | <i>T. cruzi</i> | 240 | 678  | 917  |
| Tc00.1047053503697.130 | <i>T. cruzi</i> | 248 | 973  | 1220 |
| Tc00.1047053503697.20  | <i>T. cruzi</i> | 344 | 1    | 344  |
| Tc00.1047053503697.20  | <i>T. cruzi</i> | 50  | 578  | 627  |
| Tc00.1047053503697.20  | <i>T. cruzi</i> | 54  | 719  | 772  |
| Tc00.1047053503697.30  | <i>T. cruzi</i> | 93  | 1    | 93   |
| Tc00.1047053503697.30  | <i>T. cruzi</i> | 101 | 117  | 217  |
| Tc00.1047053503697.30  | <i>T. cruzi</i> | 136 | 259  | 394  |
| Tc00.1047053503697.30  | <i>T. cruzi</i> | 76  | 396  | 471  |
| Tc00.1047053503697.30  | <i>T. cruzi</i> | 55  | 643  | 697  |
| Tc00.1047053503697.30  | <i>T. cruzi</i> | 81  | 770  | 850  |
| Tc00.1047053503697.30  | <i>T. cruzi</i> | 157 | 856  | 1012 |
| Tc00.1047053503697.30  | <i>T. cruzi</i> | 63  | 1022 | 1084 |
| Tc00.1047053503697.30  | <i>T. cruzi</i> | 261 | 1107 | 1367 |
| Tc00.1047053503697.40  | <i>T. cruzi</i> | 100 | 1    | 100  |
| Tc00.1047053503697.40  | <i>T. cruzi</i> | 92  | 187  | 278  |
| Tc00.1047053503697.50  | <i>T. cruzi</i> | 77  | 41   | 117  |
| Tc00.1047053503697.50  | <i>T. cruzi</i> | 151 | 186  | 336  |
| Tc00.1047053503697.50  | <i>T. cruzi</i> | 280 | 409  | 688  |
| Tc00.1047053503697.50  | <i>T. cruzi</i> | 63  | 710  | 772  |
| Tc00.1047053503697.60  | <i>T. cruzi</i> | 100 | 169  | 268  |
| Tc00.1047053503697.70  | <i>T. cruzi</i> | 95  | 22   | 116  |
| Tc00.1047053503697.90  | <i>T. cruzi</i> | 57  | 28   | 84   |
| Tc00.1047053503697.90  | <i>T. cruzi</i> | 60  | 281  | 340  |
| Tc00.1047053503697.90  | <i>T. cruzi</i> | 60  | 281  | 340  |
| Tc00.1047053503713.10  | <i>T. cruzi</i> | 58  | 144  | 201  |
| Tc00.1047053503713.50  | <i>T. cruzi</i> | 42  | 1    | 42   |
| Tc00.1047053503715.10  | <i>T. cruzi</i> | 45  | 1    | 45   |
| Tc00.1047053503715.10  | <i>T. cruzi</i> | 57  | 99   | 155  |
| Tc00.1047053503715.10  | <i>T. cruzi</i> | 105 | 199  | 303  |
| Tc00.1047053503715.20  | <i>T. cruzi</i> | 74  | 1    | 74   |
| Tc00.1047053503715.30  | <i>T. cruzi</i> | 46  | 165  | 210  |
| Tc00.1047053503715.40  | <i>T. cruzi</i> | 111 | 53   | 163  |
| Tc00.1047053503715.40  | <i>T. cruzi</i> | 154 | 180  | 333  |
| Tc00.1047053503715.40  | <i>T. cruzi</i> | 218 | 355  | 572  |
| Tc00.1047053503715.40  | <i>T. cruzi</i> | 103 | 590  | 692  |
| Tc00.1047053503717.10  | <i>T. cruzi</i> | 41  | 1    | 41   |
| Tc00.1047053503717.10  | <i>T. cruzi</i> | 48  | 129  | 176  |
| Tc00.1047053503717.10  | <i>T. cruzi</i> | 159 | 730  | 888  |
| Tc00.1047053503717.120 | <i>T. cruzi</i> | 50  | 1    | 50   |
| Tc00.1047053503717.120 | <i>T. cruzi</i> | 72  | 108  | 179  |
| Tc00.1047053503717.120 | <i>T. cruzi</i> | 50  | 737  | 786  |
| Tc00.1047053503717.20  | <i>T. cruzi</i> | 391 | 78   | 468  |
| Tc00.1047053503717.31  | <i>T. cruzi</i> | 168 | 17   | 184  |
| Tc00.1047053503717.60  | <i>T. cruzi</i> | 75  | 56   | 130  |
| Tc00.1047053503717.60  | <i>T. cruzi</i> | 45  | 201  | 245  |
| Tc00.1047053503717.60  | <i>T. cruzi</i> | 45  | 201  | 245  |

|                        |                 |     |     |     |
|------------------------|-----------------|-----|-----|-----|
| Tc00.1047053503717.90  | <i>T. cruzi</i> | 66  | 1   | 66  |
| Tc00.1047053503745.20  | <i>T. cruzi</i> | 59  | 530 | 588 |
| Tc00.1047053503745.30  | <i>T. cruzi</i> | 42  | 99  | 140 |
| Tc00.1047053503747.20  | <i>T. cruzi</i> | 57  | 1   | 57  |
| Tc00.1047053503747.30  | <i>T. cruzi</i> | 47  | 1   | 47  |
| Tc00.1047053503747.40  | <i>T. cruzi</i> | 58  | 105 | 162 |
| Tc00.1047053503747.40  | <i>T. cruzi</i> | 105 | 390 | 494 |
| Tc00.1047053503749.10  | <i>T. cruzi</i> | 72  | 365 | 436 |
| Tc00.1047053503749.10  | <i>T. cruzi</i> | 40  | 729 | 768 |
| Tc00.1047053503749.10  | <i>T. cruzi</i> | 40  | 729 | 768 |
| Tc00.1047053503749.20  | <i>T. cruzi</i> | 40  | 1   | 40  |
| Tc00.1047053503749.20  | <i>T. cruzi</i> | 66  | 49  | 114 |
| Tc00.1047053503749.20  | <i>T. cruzi</i> | 97  | 174 | 270 |
| Tc00.1047053503749.30  | <i>T. cruzi</i> | 98  | 339 | 436 |
| Tc00.1047053503753.10  | <i>T. cruzi</i> | 62  | 1   | 62  |
| Tc00.1047053503753.10  | <i>T. cruzi</i> | 94  | 128 | 221 |
| Tc00.1047053503753.10  | <i>T. cruzi</i> | 75  | 234 | 308 |
| Tc00.1047053503753.10  | <i>T. cruzi</i> | 73  | 310 | 382 |
| Tc00.1047053503753.10  | <i>T. cruzi</i> | 43  | 420 | 462 |
| Tc00.1047053503753.20  | <i>T. cruzi</i> | 275 | 146 | 420 |
| Tc00.1047053503753.29  | <i>T. cruzi</i> | 44  | 206 | 249 |
| Tc00.1047053503755.10  | <i>T. cruzi</i> | 42  | 1   | 42  |
| Tc00.1047053503755.10  | <i>T. cruzi</i> | 47  | 83  | 129 |
| Tc00.1047053503755.10  | <i>T. cruzi</i> | 47  | 388 | 434 |
| Tc00.1047053503755.10  | <i>T. cruzi</i> | 73  | 525 | 597 |
| Tc00.1047053503755.20  | <i>T. cruzi</i> | 111 | 198 | 308 |
| Tc00.1047053503755.30  | <i>T. cruzi</i> | 50  | 456 | 505 |
| Tc00.1047053503755.50  | <i>T. cruzi</i> | 49  | 58  | 106 |
| Tc00.1047053503755.54  | <i>T. cruzi</i> | 54  | 360 | 413 |
| Tc00.1047053503757.30  | <i>T. cruzi</i> | 78  | 1   | 78  |
| Tc00.1047053503757.30  | <i>T. cruzi</i> | 57  | 117 | 173 |
| Tc00.1047053503757.30  | <i>T. cruzi</i> | 41  | 341 | 381 |
| Tc00.1047053503757.30  | <i>T. cruzi</i> | 82  | 500 | 581 |
| Tc00.1047053503757.40  | <i>T. cruzi</i> | 66  | 214 | 279 |
| Tc00.1047053503759.10  | <i>T. cruzi</i> | 43  | 1   | 43  |
| Tc00.1047053503761.30  | <i>T. cruzi</i> | 148 | 24  | 171 |
| Tc00.1047053503761.40  | <i>T. cruzi</i> | 243 | 26  | 268 |
| Tc00.1047053503761.50  | <i>T. cruzi</i> | 107 | 1   | 107 |
| Tc00.1047053503767.10  | <i>T. cruzi</i> | 40  | 1   | 40  |
| Tc00.1047053503767.20  | <i>T. cruzi</i> | 48  | 69  | 116 |
| Tc00.1047053503777.10  | <i>T. cruzi</i> | 207 | 344 | 550 |
| Tc00.1047053503777.10  | <i>T. cruzi</i> | 131 | 572 | 702 |
| Tc00.1047053503777.10  | <i>T. cruzi</i> | 65  | 752 | 816 |
| Tc00.1047053503777.4   | <i>T. cruzi</i> | 64  | 151 | 214 |
| Tc00.1047053503779.109 | <i>T. cruzi</i> | 89  | 52  | 140 |
| Tc00.1047053503779.30  | <i>T. cruzi</i> | 125 | 92  | 216 |
| Tc00.1047053503779.50  | <i>T. cruzi</i> | 116 | 1   | 116 |

|                       |                 |     |      |      |
|-----------------------|-----------------|-----|------|------|
| Tc00.1047053503779.50 | <i>T. cruzi</i> | 162 | 154  | 315  |
| Tc00.1047053503779.60 | <i>T. cruzi</i> | 89  | 38   | 126  |
| Tc00.1047053503779.60 | <i>T. cruzi</i> | 66  | 420  | 485  |
| Tc00.1047053503779.60 | <i>T. cruzi</i> | 66  | 420  | 485  |
| Tc00.1047053503783.70 | <i>T. cruzi</i> | 174 | 22   | 195  |
| Tc00.1047053503783.80 | <i>T. cruzi</i> | 443 | 53   | 495  |
| Tc00.1047053503789.10 | <i>T. cruzi</i> | 55  | 118  | 172  |
| Tc00.1047053503789.20 | <i>T. cruzi</i> | 58  | 1    | 58   |
| Tc00.1047053503789.30 | <i>T. cruzi</i> | 59  | 96   | 154  |
| Tc00.1047053503789.60 | <i>T. cruzi</i> | 312 | 1    | 312  |
| Tc00.1047053503789.60 | <i>T. cruzi</i> | 110 | 495  | 604  |
| Tc00.1047053503789.70 | <i>T. cruzi</i> | 53  | 249  | 301  |
| Tc00.1047053503789.70 | <i>T. cruzi</i> | 50  | 321  | 370  |
| Tc00.1047053503789.70 | <i>T. cruzi</i> | 50  | 321  | 370  |
| Tc00.1047053503793.20 | <i>T. cruzi</i> | 151 | 118  | 268  |
| Tc00.1047053503801.30 | <i>T. cruzi</i> | 50  | 1    | 50   |
| Tc00.1047053503801.50 | <i>T. cruzi</i> | 40  | 177  | 216  |
| Tc00.1047053503801.60 | <i>T. cruzi</i> | 41  | 191  | 231  |
| Tc00.1047053503801.70 | <i>T. cruzi</i> | 128 | 54   | 181  |
| Tc00.1047053503801.70 | <i>T. cruzi</i> | 84  | 189  | 272  |
| Tc00.1047053503801.70 | <i>T. cruzi</i> | 63  | 295  | 357  |
| Tc00.1047053503801.70 | <i>T. cruzi</i> | 84  | 445  | 528  |
| Tc00.1047053503801.79 | <i>T. cruzi</i> | 101 | 1    | 101  |
| Tc00.1047053503801.9  | <i>T. cruzi</i> | 176 | 197  | 372  |
| Tc00.1047053503801.9  | <i>T. cruzi</i> | 199 | 382  | 580  |
| Tc00.1047053503801.9  | <i>T. cruzi</i> | 41  | 597  | 637  |
| Tc00.1047053503803.10 | <i>T. cruzi</i> | 86  | 279  | 364  |
| Tc00.1047053503803.10 | <i>T. cruzi</i> | 42  | 631  | 672  |
| Tc00.1047053503805.10 | <i>T. cruzi</i> | 41  | 366  | 406  |
| Tc00.1047053503805.20 | <i>T. cruzi</i> | 51  | 66   | 116  |
| Tc00.1047053503805.20 | <i>T. cruzi</i> | 111 | 146  | 256  |
| Tc00.1047053503805.30 | <i>T. cruzi</i> | 72  | 217  | 288  |
| Tc00.1047053503805.40 | <i>T. cruzi</i> | 117 | 39   | 155  |
| Tc00.1047053503805.40 | <i>T. cruzi</i> | 48  | 729  | 776  |
| Tc00.1047053503805.40 | <i>T. cruzi</i> | 40  | 846  | 885  |
| Tc00.1047053503805.40 | <i>T. cruzi</i> | 140 | 962  | 1101 |
| Tc00.1047053503805.40 | <i>T. cruzi</i> | 52  | 1118 | 1169 |
| Tc00.1047053503805.6  | <i>T. cruzi</i> | 244 | 1    | 244  |
| Tc00.1047053503805.6  | <i>T. cruzi</i> | 107 | 305  | 411  |
| Tc00.1047053503805.6  | <i>T. cruzi</i> | 161 | 444  | 604  |
| Tc00.1047053503805.9  | <i>T. cruzi</i> | 54  | 126  | 179  |
| Tc00.1047053503805.9  | <i>T. cruzi</i> | 81  | 361  | 441  |
| Tc00.1047053503805.9  | <i>T. cruzi</i> | 81  | 361  | 441  |
| Tc00.1047053503811.20 | <i>T. cruzi</i> | 46  | 1    | 46   |
| Tc00.1047053503811.20 | <i>T. cruzi</i> | 299 | 99   | 397  |
| Tc00.1047053503811.20 | <i>T. cruzi</i> | 64  | 436  | 499  |
| Tc00.1047053503811.20 | <i>T. cruzi</i> | 49  | 575  | 623  |

|                       |                 |     |     |     |
|-----------------------|-----------------|-----|-----|-----|
| Tc00.1047053503811.40 | <i>T. cruzi</i> | 42  | 211 | 252 |
| Tc00.1047053503811.45 | <i>T. cruzi</i> | 80  | 18  | 97  |
| Tc00.1047053503811.70 | <i>T. cruzi</i> | 52  | 709 | 760 |
| Tc00.1047053503811.80 | <i>T. cruzi</i> | 41  | 120 | 160 |
| Tc00.1047053503811.80 | <i>T. cruzi</i> | 66  | 430 | 495 |
| Tc00.1047053503811.80 | <i>T. cruzi</i> | 123 | 499 | 621 |
| Tc00.1047053503813.10 | <i>T. cruzi</i> | 179 | 118 | 296 |
| Tc00.1047053503813.10 | <i>T. cruzi</i> | 103 | 333 | 435 |
| Tc00.1047053503813.20 | <i>T. cruzi</i> | 45  | 470 | 514 |
| Tc00.1047053503819.10 | <i>T. cruzi</i> | 90  | 123 | 212 |
| Tc00.1047053503821.19 | <i>T. cruzi</i> | 350 | 51  | 400 |
| Tc00.1047053503829.30 | <i>T. cruzi</i> | 44  | 161 | 204 |
| Tc00.1047053503829.30 | <i>T. cruzi</i> | 40  | 250 | 289 |
| Tc00.1047053503829.30 | <i>T. cruzi</i> | 137 | 350 | 486 |
| Tc00.1047053503829.40 | <i>T. cruzi</i> | 66  | 1   | 66  |
| Tc00.1047053503829.40 | <i>T. cruzi</i> | 180 | 450 | 629 |
| Tc00.1047053503829.50 | <i>T. cruzi</i> | 163 | 1   | 163 |
| Tc00.1047053503829.50 | <i>T. cruzi</i> | 324 | 192 | 515 |
| Tc00.1047053503829.70 | <i>T. cruzi</i> | 106 | 1   | 106 |
| Tc00.1047053503829.70 | <i>T. cruzi</i> | 42  | 116 | 157 |
| Tc00.1047053503829.70 | <i>T. cruzi</i> | 62  | 172 | 233 |
| Tc00.1047053503829.70 | <i>T. cruzi</i> | 210 | 257 | 466 |
| Tc00.1047053503829.70 | <i>T. cruzi</i> | 49  | 841 | 889 |
| Tc00.1047053503829.80 | <i>T. cruzi</i> | 61  | 65  | 125 |
| Tc00.1047053503829.80 | <i>T. cruzi</i> | 82  | 377 | 458 |
| Tc00.1047053503833.20 | <i>T. cruzi</i> | 385 | 60  | 444 |
| Tc00.1047053503833.30 | <i>T. cruzi</i> | 153 | 1   | 153 |
| Tc00.1047053503833.30 | <i>T. cruzi</i> | 63  | 255 | 317 |
| Tc00.1047053503833.40 | <i>T. cruzi</i> | 46  | 1   | 46  |
| Tc00.1047053503833.50 | <i>T. cruzi</i> | 78  | 1   | 78  |
| Tc00.1047053503833.50 | <i>T. cruzi</i> | 47  | 97  | 143 |
| Tc00.1047053503833.50 | <i>T. cruzi</i> | 137 | 201 | 337 |
| Tc00.1047053503833.60 | <i>T. cruzi</i> | 54  | 1   | 54  |
| Tc00.1047053503833.60 | <i>T. cruzi</i> | 138 | 100 | 237 |
| Tc00.1047053503833.69 | <i>T. cruzi</i> | 90  | 1   | 90  |
| Tc00.1047053503835.39 | <i>T. cruzi</i> | 247 | 52  | 298 |
| Tc00.1047053503841.30 | <i>T. cruzi</i> | 63  | 1   | 63  |
| Tc00.1047053503841.30 | <i>T. cruzi</i> | 72  | 191 | 262 |
| Tc00.1047053503841.30 | <i>T. cruzi</i> | 72  | 191 | 262 |
| Tc00.1047053503841.40 | <i>T. cruzi</i> | 59  | 197 | 255 |
| Tc00.1047053503841.50 | <i>T. cruzi</i> | 193 | 67  | 259 |
| Tc00.1047053503841.50 | <i>T. cruzi</i> | 73  | 265 | 337 |
| Tc00.1047053503841.60 | <i>T. cruzi</i> | 227 | 86  | 312 |
| Tc00.1047053503841.60 | <i>T. cruzi</i> | 97  | 317 | 413 |
| Tc00.1047053503841.60 | <i>T. cruzi</i> | 139 | 445 | 583 |
| Tc00.1047053503841.60 | <i>T. cruzi</i> | 46  | 587 | 632 |
| Tc00.1047053503841.80 | <i>T. cruzi</i> | 69  | 33  | 101 |

|                        |                 |     |     |     |
|------------------------|-----------------|-----|-----|-----|
| Tc00.1047053503841.80  | <i>T. cruzi</i> | 41  | 146 | 186 |
| Tc00.1047053503841.80  | <i>T. cruzi</i> | 41  | 146 | 186 |
| Tc00.1047053503853.10  | <i>T. cruzi</i> | 67  | 31  | 97  |
| Tc00.1047053503853.10  | <i>T. cruzi</i> | 85  | 207 | 291 |
| Tc00.1047053503853.10  | <i>T. cruzi</i> | 64  | 317 | 380 |
| Tc00.1047053503853.10  | <i>T. cruzi</i> | 101 | 444 | 544 |
| Tc00.1047053503853.10  | <i>T. cruzi</i> | 128 | 633 | 760 |
| Tc00.1047053503855.40  | <i>T. cruzi</i> | 131 | 17  | 147 |
| Tc00.1047053503855.50  | <i>T. cruzi</i> | 57  | 222 | 278 |
| Tc00.1047053503855.50  | <i>T. cruzi</i> | 43  | 436 | 478 |
| Tc00.1047053503855.50  | <i>T. cruzi</i> | 52  | 900 | 951 |
| Tc00.1047053503855.60  | <i>T. cruzi</i> | 42  | 316 | 357 |
| Tc00.1047053503855.80  | <i>T. cruzi</i> | 78  | 56  | 133 |
| Tc00.1047053503855.80  | <i>T. cruzi</i> | 86  | 141 | 226 |
| Tc00.1047053503855.80  | <i>T. cruzi</i> | 112 | 266 | 377 |
| Tc00.1047053503855.80  | <i>T. cruzi</i> | 56  | 422 | 477 |
| Tc00.1047053503859.40  | <i>T. cruzi</i> | 347 | 74  | 420 |
| Tc00.1047053503859.45  | <i>T. cruzi</i> | 187 | 8   | 194 |
| Tc00.1047053503859.50  | <i>T. cruzi</i> | 121 | 1   | 121 |
| Tc00.1047053503863.9   | <i>T. cruzi</i> | 106 | 81  | 186 |
| Tc00.1047053503865.40  | <i>T. cruzi</i> | 113 | 96  | 208 |
| Tc00.1047053503865.50  | <i>T. cruzi</i> | 53  | 226 | 278 |
| Tc00.1047053503865.50  | <i>T. cruzi</i> | 87  | 281 | 367 |
| Tc00.1047053503865.60  | <i>T. cruzi</i> | 339 | 34  | 372 |
| Tc00.1047053503865.60  | <i>T. cruzi</i> | 40  | 432 | 471 |
| Tc00.1047053503865.60  | <i>T. cruzi</i> | 163 | 500 | 662 |
| Tc00.1047053503867.10  | <i>T. cruzi</i> | 182 | 1   | 182 |
| Tc00.1047053503873.10  | <i>T. cruzi</i> | 42  | 237 | 278 |
| Tc00.1047053503875.30  | <i>T. cruzi</i> | 388 | 24  | 411 |
| Tc00.1047053503875.40  | <i>T. cruzi</i> | 46  | 1   | 46  |
| Tc00.1047053503875.40  | <i>T. cruzi</i> | 74  | 58  | 131 |
| Tc00.1047053503881.30  | <i>T. cruzi</i> | 54  | 1   | 54  |
| Tc00.1047053503885.100 | <i>T. cruzi</i> | 54  | 49  | 102 |
| Tc00.1047053503885.100 | <i>T. cruzi</i> | 41  | 146 | 186 |
| Tc00.1047053503885.100 | <i>T. cruzi</i> | 109 | 321 | 429 |
| Tc00.1047053503885.100 | <i>T. cruzi</i> | 71  | 438 | 508 |
| Tc00.1047053503885.20  | <i>T. cruzi</i> | 193 | 1   | 193 |
| Tc00.1047053503885.20  | <i>T. cruzi</i> | 155 | 226 | 380 |
| Tc00.1047053503885.20  | <i>T. cruzi</i> | 110 | 440 | 549 |
| Tc00.1047053503885.20  | <i>T. cruzi</i> | 48  | 665 | 712 |
| Tc00.1047053503885.20  | <i>T. cruzi</i> | 82  | 809 | 890 |
| Tc00.1047053503885.60  | <i>T. cruzi</i> | 54  | 1   | 54  |
| Tc00.1047053503885.60  | <i>T. cruzi</i> | 101 | 99  | 199 |
| Tc00.1047053503885.60  | <i>T. cruzi</i> | 146 | 332 | 477 |
| Tc00.1047053503885.90  | <i>T. cruzi</i> | 50  | 483 | 532 |
| Tc00.1047053503887.20  | <i>T. cruzi</i> | 83  | 1   | 83  |
| Tc00.1047053503887.60  | <i>T. cruzi</i> | 100 | 90  | 189 |

|                        |                 |     |      |      |
|------------------------|-----------------|-----|------|------|
| Tc00.1047053503887.60  | <i>T. cruzi</i> | 45  | 244  | 288  |
| Tc00.1047053503887.60  | <i>T. cruzi</i> | 45  | 244  | 288  |
| Tc00.1047053503887.70  | <i>T. cruzi</i> | 75  | 1    | 75   |
| Tc00.1047053503887.79  | <i>T. cruzi</i> | 106 | 7    | 112  |
| Tc00.1047053503893.130 | <i>T. cruzi</i> | 211 | 1    | 211  |
| Tc00.1047053503893.130 | <i>T. cruzi</i> | 60  | 224  | 283  |
| Tc00.1047053503893.140 | <i>T. cruzi</i> | 83  | 49   | 131  |
| Tc00.1047053503893.140 | <i>T. cruzi</i> | 339 | 222  | 560  |
| Tc00.1047053503893.150 | <i>T. cruzi</i> | 53  | 911  | 963  |
| Tc00.1047053503893.150 | <i>T. cruzi</i> | 77  | 1267 | 1343 |
| Tc00.1047053503893.150 | <i>T. cruzi</i> | 40  | 1427 | 1466 |
| Tc00.1047053503893.150 | <i>T. cruzi</i> | 96  | 1693 | 1788 |
| Tc00.1047053503893.150 | <i>T. cruzi</i> | 69  | 2570 | 2638 |
| Tc00.1047053503893.150 | <i>T. cruzi</i> | 66  | 2903 | 2968 |
| Tc00.1047053503893.160 | <i>T. cruzi</i> | 66  | 1    | 66   |
| Tc00.1047053503893.160 | <i>T. cruzi</i> | 43  | 244  | 286  |
| Tc00.1047053503893.160 | <i>T. cruzi</i> | 43  | 244  | 286  |
| Tc00.1047053503893.181 | <i>T. cruzi</i> | 53  | 76   | 128  |
| Tc00.1047053503893.40  | <i>T. cruzi</i> | 98  | 1    | 98   |
| Tc00.1047053503893.40  | <i>T. cruzi</i> | 65  | 282  | 346  |
| Tc00.1047053503893.50  | <i>T. cruzi</i> | 45  | 59   | 103  |
| Tc00.1047053503893.60  | <i>T. cruzi</i> | 258 | 82   | 339  |
| Tc00.1047053503895.10  | <i>T. cruzi</i> | 247 | 1    | 247  |
| Tc00.1047053503895.19  | <i>T. cruzi</i> | 87  | 1167 | 1253 |
| Tc00.1047053503895.19  | <i>T. cruzi</i> | 54  | 1292 | 1345 |
| Tc00.1047053503895.19  | <i>T. cruzi</i> | 48  | 1394 | 1441 |
| Tc00.1047053503895.19  | <i>T. cruzi</i> | 44  | 1614 | 1657 |
| Tc00.1047053503895.19  | <i>T. cruzi</i> | 50  | 1870 | 1919 |
| Tc00.1047053503895.19  | <i>T. cruzi</i> | 49  | 1949 | 1997 |
| Tc00.1047053503895.19  | <i>T. cruzi</i> | 102 | 2221 | 2322 |
| Tc00.1047053503895.19  | <i>T. cruzi</i> | 84  | 2375 | 2458 |
| Tc00.1047053503897.100 | <i>T. cruzi</i> | 61  | 212  | 272  |
| Tc00.1047053503897.100 | <i>T. cruzi</i> | 49  | 389  | 437  |
| Tc00.1047053503897.100 | <i>T. cruzi</i> | 40  | 551  | 590  |
| Tc00.1047053503897.100 | <i>T. cruzi</i> | 40  | 776  | 815  |
| Tc00.1047053503897.100 | <i>T. cruzi</i> | 78  | 1052 | 1129 |
| Tc00.1047053503897.110 | <i>T. cruzi</i> | 54  | 45   | 98   |
| Tc00.1047053503897.110 | <i>T. cruzi</i> | 190 | 110  | 299  |
| Tc00.1047053503897.110 | <i>T. cruzi</i> | 267 | 341  | 607  |
| Tc00.1047053503897.110 | <i>T. cruzi</i> | 50  | 673  | 722  |
| Tc00.1047053503897.120 | <i>T. cruzi</i> | 40  | 65   | 104  |
| Tc00.1047053503897.130 | <i>T. cruzi</i> | 59  | 18   | 76   |
| Tc00.1047053503897.130 | <i>T. cruzi</i> | 257 | 104  | 360  |
| Tc00.1047053503897.140 | <i>T. cruzi</i> | 87  | 1    | 87   |
| Tc00.1047053503897.140 | <i>T. cruzi</i> | 49  | 232  | 280  |
| Tc00.1047053503897.150 | <i>T. cruzi</i> | 115 | 110  | 224  |
| Tc00.1047053503897.20  | <i>T. cruzi</i> | 52  | 58   | 109  |



|                        |                 |     |     |      |
|------------------------|-----------------|-----|-----|------|
| Tc00.1047053503897.20  | <i>T. cruzi</i> | 229 | 254 | 482  |
| Tc00.1047053503897.20  | <i>T. cruzi</i> | 394 | 808 | 1201 |
| Tc00.1047053503897.30  | <i>T. cruzi</i> | 225 | 1   | 225  |
| Tc00.1047053503897.60  | <i>T. cruzi</i> | 44  | 1   | 44   |
| Tc00.1047053503897.60  | <i>T. cruzi</i> | 89  | 100 | 188  |
| Tc00.1047053503897.60  | <i>T. cruzi</i> | 123 | 196 | 318  |
| Tc00.1047053503897.70  | <i>T. cruzi</i> | 173 | 1   | 173  |
| Tc00.1047053503897.80  | <i>T. cruzi</i> | 41  | 43  | 83   |
| Tc00.1047053503897.90  | <i>T. cruzi</i> | 232 | 94  | 325  |
| Tc00.1047053503897.90  | <i>T. cruzi</i> | 41  | 599 | 639  |
| Tc00.1047053503897.90  | <i>T. cruzi</i> | 70  | 714 | 783  |
| Tc00.1047053503899.100 | <i>T. cruzi</i> | 59  | 404 | 462  |
| Tc00.1047053503899.100 | <i>T. cruzi</i> | 54  | 493 | 546  |
| Tc00.1047053503899.139 | <i>T. cruzi</i> | 68  | 600 | 667  |
| Tc00.1047053503899.40  | <i>T. cruzi</i> | 81  | 161 | 241  |
| Tc00.1047053503899.40  | <i>T. cruzi</i> | 187 | 271 | 457  |
| Tc00.1047053503899.40  | <i>T. cruzi</i> | 64  | 462 | 525  |
| Tc00.1047053503899.40  | <i>T. cruzi</i> | 46  | 564 | 609  |
| Tc00.1047053503899.50  | <i>T. cruzi</i> | 57  | 77  | 133  |
| Tc00.1047053503899.50  | <i>T. cruzi</i> | 87  | 563 | 649  |
| Tc00.1047053503899.60  | <i>T. cruzi</i> | 47  | 125 | 171  |
| Tc00.1047053503899.60  | <i>T. cruzi</i> | 42  | 185 | 226  |
| Tc00.1047053503899.60  | <i>T. cruzi</i> | 42  | 185 | 226  |
| Tc00.1047053503899.70  | <i>T. cruzi</i> | 269 | 1   | 269  |
| Tc00.1047053503899.70  | <i>T. cruzi</i> | 191 | 361 | 551  |
| Tc00.1047053503899.80  | <i>T. cruzi</i> | 94  | 1   | 94   |
| Tc00.1047053503899.80  | <i>T. cruzi</i> | 154 | 172 | 325  |
| Tc00.1047053503901.18  | <i>T. cruzi</i> | 47  | 497 | 543  |
| Tc00.1047053503903.10  | <i>T. cruzi</i> | 65  | 116 | 180  |
| Tc00.1047053503903.20  | <i>T. cruzi</i> | 103 | 53  | 155  |
| Tc00.1047053503903.20  | <i>T. cruzi</i> | 47  | 280 | 326  |
| Tc00.1047053503903.20  | <i>T. cruzi</i> | 47  | 280 | 326  |
| Tc00.1047053503903.30  | <i>T. cruzi</i> | 171 | 281 | 451  |
| Tc00.1047053503903.79  | <i>T. cruzi</i> | 83  | 1   | 83   |
| Tc00.1047053503903.79  | <i>T. cruzi</i> | 128 | 608 | 735  |
| Tc00.1047053503905.30  | <i>T. cruzi</i> | 434 | 39  | 472  |
| Tc00.1047053503905.40  | <i>T. cruzi</i> | 42  | 386 | 427  |
| Tc00.1047053503905.50  | <i>T. cruzi</i> | 55  | 115 | 169  |
| Tc00.1047053503905.50  | <i>T. cruzi</i> | 49  | 233 | 281  |
| Tc00.1047053503905.50  | <i>T. cruzi</i> | 40  | 353 | 392  |
| Tc00.1047053503907.10  | <i>T. cruzi</i> | 45  | 406 | 450  |
| Tc00.1047053503907.10  | <i>T. cruzi</i> | 211 | 669 | 879  |
| Tc00.1047053503909.110 | <i>T. cruzi</i> | 73  | 58  | 130  |
| Tc00.1047053503909.40  | <i>T. cruzi</i> | 80  | 99  | 178  |
| Tc00.1047053503909.44  | <i>T. cruzi</i> | 68  | 1   | 68   |
| Tc00.1047053503909.50  | <i>T. cruzi</i> | 70  | 470 | 539  |
| Tc00.1047053503909.60  | <i>T. cruzi</i> | 93  | 116 | 208  |

|                        |                 |     |      |      |
|------------------------|-----------------|-----|------|------|
| Tc00.1047053503909.68  | <i>T. cruzi</i> | 208 | 1    | 208  |
| Tc00.1047053503909.68  | <i>T. cruzi</i> | 64  | 252  | 315  |
| Tc00.1047053503909.84  | <i>T. cruzi</i> | 63  | 152  | 214  |
| Tc00.1047053503909.90  | <i>T. cruzi</i> | 40  | 272  | 311  |
| Tc00.1047053503927.9   | <i>T. cruzi</i> | 53  | 1    | 53   |
| Tc00.1047053503953.10  | <i>T. cruzi</i> | 126 | 42   | 167  |
| Tc00.1047053503953.10  | <i>T. cruzi</i> | 54  | 316  | 369  |
| Tc00.1047053503953.10  | <i>T. cruzi</i> | 104 | 430  | 533  |
| Tc00.1047053503953.14  | <i>T. cruzi</i> | 138 | 12   | 149  |
| Tc00.1047053503953.20  | <i>T. cruzi</i> | 93  | 87   | 179  |
| Tc00.1047053503953.30  | <i>T. cruzi</i> | 221 | 319  | 539  |
| Tc00.1047053503953.30  | <i>T. cruzi</i> | 229 | 549  | 777  |
| Tc00.1047053503953.30  | <i>T. cruzi</i> | 51  | 801  | 851  |
| Tc00.1047053503953.30  | <i>T. cruzi</i> | 69  | 928  | 996  |
| Tc00.1047053503953.40  | <i>T. cruzi</i> | 46  | 16   | 61   |
| Tc00.1047053503953.50  | <i>T. cruzi</i> | 55  | 191  | 245  |
| Tc00.1047053503953.50  | <i>T. cruzi</i> | 42  | 329  | 370  |
| Tc00.1047053503953.50  | <i>T. cruzi</i> | 62  | 594  | 655  |
| Tc00.1047053503953.50  | <i>T. cruzi</i> | 68  | 994  | 1061 |
| Tc00.1047053503953.59  | <i>T. cruzi</i> | 97  | 1    | 97   |
| Tc00.1047053503953.59  | <i>T. cruzi</i> | 44  | 234  | 277  |
| Tc00.1047053503955.100 | <i>T. cruzi</i> | 43  | 648  | 690  |
| Tc00.1047053503955.100 | <i>T. cruzi</i> | 200 | 807  | 1006 |
| Tc00.1047053503955.100 | <i>T. cruzi</i> | 142 | 1081 | 1222 |
| Tc00.1047053503955.100 | <i>T. cruzi</i> | 109 | 1285 | 1393 |
| Tc00.1047053503955.100 | <i>T. cruzi</i> | 70  | 1427 | 1496 |
| Tc00.1047053503955.20  | <i>T. cruzi</i> | 48  | 328  | 375  |
| Tc00.1047053503955.40  | <i>T. cruzi</i> | 44  | 1    | 44   |
| Tc00.1047053503955.40  | <i>T. cruzi</i> | 71  | 221  | 291  |
| Tc00.1047053503955.40  | <i>T. cruzi</i> | 71  | 221  | 291  |
| Tc00.1047053503955.50  | <i>T. cruzi</i> | 66  | 87   | 152  |
| Tc00.1047053503955.50  | <i>T. cruzi</i> | 62  | 197  | 258  |
| Tc00.1047053503955.50  | <i>T. cruzi</i> | 41  | 623  | 663  |
| Tc00.1047053503955.70  | <i>T. cruzi</i> | 100 | 1    | 100  |
| Tc00.1047053503955.70  | <i>T. cruzi</i> | 89  | 131  | 219  |
| Tc00.1047053503955.80  | <i>T. cruzi</i> | 183 | 120  | 302  |
| Tc00.1047053503955.80  | <i>T. cruzi</i> | 151 | 359  | 509  |
| Tc00.1047053503955.80  | <i>T. cruzi</i> | 80  | 570  | 649  |
| Tc00.1047053503955.89  | <i>T. cruzi</i> | 71  | 127  | 197  |
| Tc00.1047053503957.120 | <i>T. cruzi</i> | 44  | 77   | 120  |
| Tc00.1047053503957.120 | <i>T. cruzi</i> | 48  | 398  | 445  |
| Tc00.1047053503957.120 | <i>T. cruzi</i> | 48  | 398  | 445  |
| Tc00.1047053503957.20  | <i>T. cruzi</i> | 77  | 1    | 77   |
| Tc00.1047053503957.20  | <i>T. cruzi</i> | 44  | 364  | 407  |
| Tc00.1047053503957.30  | <i>T. cruzi</i> | 85  | 55   | 139  |
| Tc00.1047053503959.20  | <i>T. cruzi</i> | 110 | 1    | 110  |
| Tc00.1047053503959.20  | <i>T. cruzi</i> | 66  | 396  | 461  |

|                        |                 |     |      |      |
|------------------------|-----------------|-----|------|------|
| Tc00.1047053503959.30  | <i>T. cruzi</i> | 72  | 1    | 72   |
| Tc00.1047053503959.30  | <i>T. cruzi</i> | 53  | 168  | 220  |
| Tc00.1047053503959.30  | <i>T. cruzi</i> | 143 | 555  | 697  |
| Tc00.1047053503959.40  | <i>T. cruzi</i> | 67  | 72   | 138  |
| Tc00.1047053503959.40  | <i>T. cruzi</i> | 96  | 231  | 326  |
| Tc00.1047053503959.40  | <i>T. cruzi</i> | 42  | 417  | 458  |
| Tc00.1047053503959.50  | <i>T. cruzi</i> | 99  | 250  | 348  |
| Tc00.1047053503967.10  | <i>T. cruzi</i> | 40  | 1    | 40   |
| Tc00.1047053503967.10  | <i>T. cruzi</i> | 42  | 188  | 229  |
| Tc00.1047053503967.10  | <i>T. cruzi</i> | 42  | 336  | 377  |
| Tc00.1047053503967.19  | <i>T. cruzi</i> | 50  | 88   | 137  |
| Tc00.1047053503967.19  | <i>T. cruzi</i> | 77  | 296  | 372  |
| Tc00.1047053503969.20  | <i>T. cruzi</i> | 49  | 38   | 86   |
| Tc00.1047053503971.10  | <i>T. cruzi</i> | 136 | 503  | 638  |
| Tc00.1047053503971.20  | <i>T. cruzi</i> | 59  | 98   | 156  |
| Tc00.1047053503971.50  | <i>T. cruzi</i> | 112 | 1    | 112  |
| Tc00.1047053503971.50  | <i>T. cruzi</i> | 235 | 117  | 351  |
| Tc00.1047053503971.59  | <i>T. cruzi</i> | 294 | 1    | 294  |
| Tc00.1047053503975.100 | <i>T. cruzi</i> | 772 | 1    | 772  |
| Tc00.1047053503975.100 | <i>T. cruzi</i> | 272 | 995  | 1266 |
| Tc00.1047053503975.100 | <i>T. cruzi</i> | 84  | 1511 | 1594 |
| Tc00.1047053503975.100 | <i>T. cruzi</i> | 56  | 1870 | 1925 |
| Tc00.1047053503975.20  | <i>T. cruzi</i> | 268 | 43   | 310  |
| Tc00.1047053503975.20  | <i>T. cruzi</i> | 63  | 682  | 744  |
| Tc00.1047053503975.40  | <i>T. cruzi</i> | 528 | 1    | 528  |
| Tc00.1047053503975.50  | <i>T. cruzi</i> | 195 | 1    | 195  |
| Tc00.1047053503975.50  | <i>T. cruzi</i> | 58  | 246  | 303  |
| Tc00.1047053503975.50  | <i>T. cruzi</i> | 91  | 564  | 654  |
| Tc00.1047053503975.60  | <i>T. cruzi</i> | 180 | 1    | 180  |
| Tc00.1047053503975.70  | <i>T. cruzi</i> | 110 | 53   | 162  |
| Tc00.1047053503975.70  | <i>T. cruzi</i> | 100 | 257  | 356  |
| Tc00.1047053503975.70  | <i>T. cruzi</i> | 100 | 257  | 356  |
| Tc00.1047053503977.30  | <i>T. cruzi</i> | 193 | 29   | 221  |
| Tc00.1047053503977.40  | <i>T. cruzi</i> | 158 | 14   | 171  |
| Tc00.1047053503981.20  | <i>T. cruzi</i> | 198 | 1    | 198  |
| Tc00.1047053503981.30  | <i>T. cruzi</i> | 49  | 1    | 49   |
| Tc00.1047053503981.30  | <i>T. cruzi</i> | 61  | 59   | 119  |
| Tc00.1047053503981.30  | <i>T. cruzi</i> | 118 | 343  | 460  |
| Tc00.1047053503981.30  | <i>T. cruzi</i> | 92  | 488  | 579  |
| Tc00.1047053503981.40  | <i>T. cruzi</i> | 70  | 582  | 651  |
| Tc00.1047053503981.40  | <i>T. cruzi</i> | 70  | 668  | 737  |
| Tc00.1047053503981.50  | <i>T. cruzi</i> | 51  | 129  | 179  |
| Tc00.1047053503981.60  | <i>T. cruzi</i> | 40  | 106  | 145  |
| Tc00.1047053503981.70  | <i>T. cruzi</i> | 41  | 318  | 358  |
| Tc00.1047053503981.80  | <i>T. cruzi</i> | 74  | 710  | 783  |
| Tc00.1047053503989.10  | <i>T. cruzi</i> | 81  | 100  | 180  |
| Tc00.1047053503989.50  | <i>T. cruzi</i> | 59  | 1469 | 1527 |

|                       |                 |      |      |      |
|-----------------------|-----------------|------|------|------|
| Tc00.1047053503989.50 | <i>T. cruzi</i> | 133  | 2143 | 2275 |
| Tc00.1047053503989.50 | <i>T. cruzi</i> | 55   | 3046 | 3100 |
| Tc00.1047053503989.50 | <i>T. cruzi</i> | 80   | 3146 | 3225 |
| Tc00.1047053504005.29 | <i>T. cruzi</i> | 134  | 16   | 149  |
| Tc00.1047053504005.29 | <i>T. cruzi</i> | 78   | 155  | 232  |
| Tc00.1047053504005.29 | <i>T. cruzi</i> | 78   | 155  | 232  |
| Tc00.1047053504005.40 | <i>T. cruzi</i> | 49   | 209  | 257  |
| Tc00.1047053504009.10 | <i>T. cruzi</i> | 43   | 1    | 43   |
| Tc00.1047053504009.10 | <i>T. cruzi</i> | 56   | 188  | 243  |
| Tc00.1047053504009.10 | <i>T. cruzi</i> | 56   | 188  | 243  |
| Tc00.1047053504009.30 | <i>T. cruzi</i> | 41   | 380  | 420  |
| Tc00.1047053504009.40 | <i>T. cruzi</i> | 60   | 1    | 60   |
| Tc00.1047053504009.40 | <i>T. cruzi</i> | 97   | 249  | 345  |
| Tc00.1047053504009.40 | <i>T. cruzi</i> | 97   | 249  | 345  |
| Tc00.1047053504009.60 | <i>T. cruzi</i> | 315  | 1    | 315  |
| Tc00.1047053504009.60 | <i>T. cruzi</i> | 97   | 332  | 428  |
| Tc00.1047053504009.60 | <i>T. cruzi</i> | 49   | 607  | 655  |
| Tc00.1047053504009.60 | <i>T. cruzi</i> | 90   | 706  | 795  |
| Tc00.1047053504011.40 | <i>T. cruzi</i> | 60   | 233  | 292  |
| Tc00.1047053504011.60 | <i>T. cruzi</i> | 61   | 1    | 61   |
| Tc00.1047053504017.20 | <i>T. cruzi</i> | 48   | 131  | 178  |
| Tc00.1047053504017.30 | <i>T. cruzi</i> | 150  | 134  | 283  |
| Tc00.1047053504017.30 | <i>T. cruzi</i> | 67   | 395  | 461  |
| Tc00.1047053504017.30 | <i>T. cruzi</i> | 84   | 535  | 618  |
| Tc00.1047053504017.30 | <i>T. cruzi</i> | 79   | 650  | 728  |
| Tc00.1047053504017.50 | <i>T. cruzi</i> | 56   | 60   | 115  |
| Tc00.1047053504017.54 | <i>T. cruzi</i> | 59   | 1    | 59   |
| Tc00.1047053504017.54 | <i>T. cruzi</i> | 49   | 186  | 234  |
| Tc00.1047053504017.60 | <i>T. cruzi</i> | 127  | 345  | 471  |
| Tc00.1047053504017.70 | <i>T. cruzi</i> | 169  | 99   | 267  |
| Tc00.1047053504017.79 | <i>T. cruzi</i> | 53   | 113  | 165  |
| Tc00.1047053504019.3  | <i>T. cruzi</i> | 46   | 25   | 70   |
| Tc00.1047053504019.3  | <i>T. cruzi</i> | 1731 | 84   | 1814 |
| Tc00.1047053504019.6  | <i>T. cruzi</i> | 63   | 96   | 158  |
| Tc00.1047053504019.6  | <i>T. cruzi</i> | 106  | 281  | 386  |
| Tc00.1047053504019.6  | <i>T. cruzi</i> | 106  | 281  | 386  |
| Tc00.1047053504025.19 | <i>T. cruzi</i> | 174  | 1    | 174  |
| Tc00.1047053504025.19 | <i>T. cruzi</i> | 60   | 207  | 266  |
| Tc00.1047053504025.19 | <i>T. cruzi</i> | 60   | 207  | 266  |
| Tc00.1047053504029.21 | <i>T. cruzi</i> | 50   | 1    | 50   |
| Tc00.1047053504029.21 | <i>T. cruzi</i> | 40   | 234  | 273  |
| Tc00.1047053504029.21 | <i>T. cruzi</i> | 71   | 420  | 490  |
| Tc00.1047053504029.21 | <i>T. cruzi</i> | 94   | 703  | 796  |
| Tc00.1047053504029.40 | <i>T. cruzi</i> | 602  | 1    | 602  |
| Tc00.1047053504029.40 | <i>T. cruzi</i> | 81   | 606  | 686  |
| Tc00.1047053504029.40 | <i>T. cruzi</i> | 48   | 902  | 949  |
| Tc00.1047053504029.40 | <i>T. cruzi</i> | 349  | 1134 | 1482 |

|                        |                 |     |      |      |
|------------------------|-----------------|-----|------|------|
| Tc00.1047053504029.50  | <i>T. cruzi</i> | 54  | 1    | 54   |
| Tc00.1047053504029.50  | <i>T. cruzi</i> | 201 | 144  | 344  |
| Tc00.1047053504029.60  | <i>T. cruzi</i> | 47  | 193  | 239  |
| Tc00.1047053504029.70  | <i>T. cruzi</i> | 51  | 19   | 69   |
| Tc00.1047053504029.70  | <i>T. cruzi</i> | 76  | 76   | 151  |
| Tc00.1047053504029.70  | <i>T. cruzi</i> | 44  | 231  | 274  |
| Tc00.1047053504033.100 | <i>T. cruzi</i> | 95  | 116  | 210  |
| Tc00.1047053504033.100 | <i>T. cruzi</i> | 142 | 282  | 423  |
| Tc00.1047053504033.100 | <i>T. cruzi</i> | 333 | 427  | 759  |
| Tc00.1047053504033.110 | <i>T. cruzi</i> | 146 | 1    | 146  |
| Tc00.1047053504033.160 | <i>T. cruzi</i> | 47  | 1    | 47   |
| Tc00.1047053504033.160 | <i>T. cruzi</i> | 70  | 60   | 129  |
| Tc00.1047053504033.160 | <i>T. cruzi</i> | 69  | 198  | 266  |
| Tc00.1047053504033.160 | <i>T. cruzi</i> | 177 | 389  | 565  |
| Tc00.1047053504033.170 | <i>T. cruzi</i> | 144 | 197  | 340  |
| Tc00.1047053504033.180 | <i>T. cruzi</i> | 49  | 1145 | 1193 |
| Tc00.1047053504033.190 | <i>T. cruzi</i> | 96  | 69   | 164  |
| Tc00.1047053504033.200 | <i>T. cruzi</i> | 52  | 1    | 52   |
| Tc00.1047053504033.200 | <i>T. cruzi</i> | 55  | 520  | 574  |
| Tc00.1047053504033.210 | <i>T. cruzi</i> | 40  | 17   | 56   |
| Tc00.1047053504033.210 | <i>T. cruzi</i> | 64  | 98   | 161  |
| Tc00.1047053504033.220 | <i>T. cruzi</i> | 91  | 706  | 796  |
| Tc00.1047053504033.40  | <i>T. cruzi</i> | 118 | 28   | 145  |
| Tc00.1047053504033.40  | <i>T. cruzi</i> | 186 | 185  | 370  |
| Tc00.1047053504035.100 | <i>T. cruzi</i> | 114 | 235  | 348  |
| Tc00.1047053504035.100 | <i>T. cruzi</i> | 44  | 437  | 480  |
| Tc00.1047053504035.100 | <i>T. cruzi</i> | 63  | 762  | 824  |
| Tc00.1047053504035.110 | <i>T. cruzi</i> | 54  | 283  | 336  |
| Tc00.1047053504035.110 | <i>T. cruzi</i> | 71  | 388  | 458  |
| Tc00.1047053504035.120 | <i>T. cruzi</i> | 54  | 101  | 154  |
| Tc00.1047053504035.120 | <i>T. cruzi</i> | 44  | 344  | 387  |
| Tc00.1047053504035.120 | <i>T. cruzi</i> | 44  | 344  | 387  |
| Tc00.1047053504035.140 | <i>T. cruzi</i> | 48  | 423  | 470  |
| Tc00.1047053504035.140 | <i>T. cruzi</i> | 101 | 487  | 587  |
| Tc00.1047053504035.140 | <i>T. cruzi</i> | 101 | 487  | 587  |
| Tc00.1047053504035.149 | <i>T. cruzi</i> | 95  | 80   | 174  |
| Tc00.1047053504035.149 | <i>T. cruzi</i> | 143 | 264  | 406  |
| Tc00.1047053504035.149 | <i>T. cruzi</i> | 43  | 413  | 455  |
| Tc00.1047053504035.60  | <i>T. cruzi</i> | 41  | 161  | 201  |
| Tc00.1047053504035.90  | <i>T. cruzi</i> | 80  | 406  | 485  |
| Tc00.1047053504035.90  | <i>T. cruzi</i> | 84  | 624  | 707  |
| Tc00.1047053504035.90  | <i>T. cruzi</i> | 84  | 624  | 707  |
| Tc00.1047053504039.120 | <i>T. cruzi</i> | 160 | 27   | 186  |
| Tc00.1047053504039.130 | <i>T. cruzi</i> | 465 | 50   | 514  |
| Tc00.1047053504039.160 | <i>T. cruzi</i> | 235 | 27   | 261  |
| Tc00.1047053504039.180 | <i>T. cruzi</i> | 385 | 49   | 433  |
| Tc00.1047053504039.200 | <i>T. cruzi</i> | 368 | 26   | 393  |

|                        |                 |     |      |      |
|------------------------|-----------------|-----|------|------|
| Tc00.1047053504039.230 | <i>T. cruzi</i> | 243 | 27   | 269  |
| Tc00.1047053504039.240 | <i>T. cruzi</i> | 189 | 26   | 214  |
| Tc00.1047053504039.70  | <i>T. cruzi</i> | 58  | 126  | 183  |
| Tc00.1047053504041.10  | <i>T. cruzi</i> | 75  | 1    | 75   |
| Tc00.1047053504041.10  | <i>T. cruzi</i> | 48  | 185  | 232  |
| Tc00.1047053504041.10  | <i>T. cruzi</i> | 48  | 185  | 232  |
| Tc00.1047053504047.20  | <i>T. cruzi</i> | 54  | 310  | 363  |
| Tc00.1047053504047.30  | <i>T. cruzi</i> | 79  | 316  | 394  |
| Tc00.1047053504047.30  | <i>T. cruzi</i> | 62  | 446  | 507  |
| Tc00.1047053504047.30  | <i>T. cruzi</i> | 69  | 536  | 604  |
| Tc00.1047053504047.30  | <i>T. cruzi</i> | 115 | 634  | 748  |
| Tc00.1047053504047.40  | <i>T. cruzi</i> | 88  | 1    | 88   |
| Tc00.1047053504047.40  | <i>T. cruzi</i> | 230 | 436  | 665  |
| Tc00.1047053504047.40  | <i>T. cruzi</i> | 127 | 713  | 839  |
| Tc00.1047053504047.40  | <i>T. cruzi</i> | 140 | 854  | 993  |
| Tc00.1047053504047.50  | <i>T. cruzi</i> | 715 | 728  | 1442 |
| Tc00.1047053504047.60  | <i>T. cruzi</i> | 116 | 310  | 425  |
| Tc00.1047053504047.70  | <i>T. cruzi</i> | 49  | 1    | 49   |
| Tc00.1047053504051.20  | <i>T. cruzi</i> | 322 | 912  | 1233 |
| Tc00.1047053504051.40  | <i>T. cruzi</i> | 497 | 1    | 497  |
| Tc00.1047053504051.40  | <i>T. cruzi</i> | 150 | 812  | 961  |
| Tc00.1047053504051.49  | <i>T. cruzi</i> | 62  | 84   | 145  |
| Tc00.1047053504055.20  | <i>T. cruzi</i> | 41  | 91   | 131  |
| Tc00.1047053504055.30  | <i>T. cruzi</i> | 46  | 48   | 93   |
| Tc00.1047053504055.40  | <i>T. cruzi</i> | 45  | 1169 | 1213 |
| Tc00.1047053504055.60  | <i>T. cruzi</i> | 62  | 156  | 217  |
| Tc00.1047053504055.81  | <i>T. cruzi</i> | 73  | 129  | 201  |
| Tc00.1047053504057.104 | <i>T. cruzi</i> | 52  | 1    | 52   |
| Tc00.1047053504057.110 | <i>T. cruzi</i> | 64  | 560  | 623  |
| Tc00.1047053504057.110 | <i>T. cruzi</i> | 114 | 655  | 768  |
| Tc00.1047053504057.130 | <i>T. cruzi</i> | 72  | 1    | 72   |
| Tc00.1047053504057.130 | <i>T. cruzi</i> | 103 | 146  | 248  |
| Tc00.1047053504057.150 | <i>T. cruzi</i> | 43  | 119  | 161  |
| Tc00.1047053504057.150 | <i>T. cruzi</i> | 60  | 188  | 247  |
| Tc00.1047053504057.150 | <i>T. cruzi</i> | 60  | 188  | 247  |
| Tc00.1047053504057.160 | <i>T. cruzi</i> | 84  | 5    | 88   |
| Tc00.1047053504057.170 | <i>T. cruzi</i> | 67  | 1    | 67   |
| Tc00.1047053504057.170 | <i>T. cruzi</i> | 44  | 100  | 143  |
| Tc00.1047053504057.170 | <i>T. cruzi</i> | 77  | 437  | 513  |
| Tc00.1047053504057.170 | <i>T. cruzi</i> | 146 | 516  | 661  |
| Tc00.1047053504057.30  | <i>T. cruzi</i> | 43  | 225  | 267  |
| Tc00.1047053504057.30  | <i>T. cruzi</i> | 65  | 720  | 784  |
| Tc00.1047053504057.30  | <i>T. cruzi</i> | 75  | 787  | 861  |
| Tc00.1047053504057.30  | <i>T. cruzi</i> | 64  | 882  | 945  |
| Tc00.1047053504057.40  | <i>T. cruzi</i> | 66  | 54   | 119  |
| Tc00.1047053504057.45  | <i>T. cruzi</i> | 100 | 223  | 322  |
| Tc00.1047053504057.45  | <i>T. cruzi</i> | 83  | 344  | 426  |

|                       |                 |     |      |      |
|-----------------------|-----------------|-----|------|------|
| Tc00.1047053504057.50 | <i>T. cruzi</i> | 240 | 79   | 318  |
| Tc00.1047053504057.60 | <i>T. cruzi</i> | 72  | 89   | 160  |
| Tc00.1047053504057.70 | <i>T. cruzi</i> | 54  | 163  | 216  |
| Tc00.1047053504057.90 | <i>T. cruzi</i> | 40  | 48   | 87   |
| Tc00.1047053504057.90 | <i>T. cruzi</i> | 44  | 209  | 252  |
| Tc00.1047053504057.90 | <i>T. cruzi</i> | 44  | 209  | 252  |
| Tc00.1047053504057.97 | <i>T. cruzi</i> | 52  | 31   | 82   |
| Tc00.1047053504073.10 | <i>T. cruzi</i> | 77  | 21   | 97   |
| Tc00.1047053504073.10 | <i>T. cruzi</i> | 53  | 216  | 268  |
| Tc00.1047053504073.10 | <i>T. cruzi</i> | 72  | 389  | 460  |
| Tc00.1047053504073.20 | <i>T. cruzi</i> | 77  | 1    | 77   |
| Tc00.1047053504073.20 | <i>T. cruzi</i> | 130 | 106  | 235  |
| Tc00.1047053504073.20 | <i>T. cruzi</i> | 130 | 106  | 235  |
| Tc00.1047053504075.10 | <i>T. cruzi</i> | 84  | 445  | 528  |
| Tc00.1047053504087.10 | <i>T. cruzi</i> | 67  | 25   | 91   |
| Tc00.1047053504087.10 | <i>T. cruzi</i> | 111 | 167  | 277  |
| Tc00.1047053504087.10 | <i>T. cruzi</i> | 175 | 308  | 482  |
| Tc00.1047053504087.20 | <i>T. cruzi</i> | 44  | 137  | 180  |
| Tc00.1047053504087.20 | <i>T. cruzi</i> | 49  | 968  | 1016 |
| Tc00.1047053504087.20 | <i>T. cruzi</i> | 69  | 1790 | 1858 |
| Tc00.1047053504087.20 | <i>T. cruzi</i> | 118 | 2866 | 2983 |
| Tc00.1047053504089.14 | <i>T. cruzi</i> | 161 | 55   | 215  |
| Tc00.1047053504089.50 | <i>T. cruzi</i> | 52  | 67   | 118  |
| Tc00.1047053504089.50 | <i>T. cruzi</i> | 53  | 299  | 351  |
| Tc00.1047053504089.50 | <i>T. cruzi</i> | 122 | 368  | 489  |
| Tc00.1047053504089.50 | <i>T. cruzi</i> | 57  | 540  | 596  |
| Tc00.1047053504089.54 | <i>T. cruzi</i> | 93  | 269  | 361  |
| Tc00.1047053504089.54 | <i>T. cruzi</i> | 40  | 410  | 449  |
| Tc00.1047053504089.54 | <i>T. cruzi</i> | 40  | 410  | 449  |
| Tc00.1047053504089.60 | <i>T. cruzi</i> | 53  | 70   | 122  |
| Tc00.1047053504089.70 | <i>T. cruzi</i> | 46  | 72   | 117  |
| Tc00.1047053504097.10 | <i>T. cruzi</i> | 46  | 27   | 72   |
| Tc00.1047053504097.10 | <i>T. cruzi</i> | 55  | 472  | 526  |
| Tc00.1047053504097.10 | <i>T. cruzi</i> | 55  | 472  | 526  |
| Tc00.1047053504097.20 | <i>T. cruzi</i> | 100 | 182  | 281  |
| Tc00.1047053504097.30 | <i>T. cruzi</i> | 57  | 65   | 121  |
| Tc00.1047053504097.30 | <i>T. cruzi</i> | 95  | 203  | 297  |
| Tc00.1047053504097.30 | <i>T. cruzi</i> | 46  | 829  | 874  |
| Tc00.1047053504097.4  | <i>T. cruzi</i> | 79  | 184  | 262  |
| Tc00.1047053504097.4  | <i>T. cruzi</i> | 73  | 398  | 470  |
| Tc00.1047053504099.10 | <i>T. cruzi</i> | 53  | 1    | 53   |
| Tc00.1047053504099.10 | <i>T. cruzi</i> | 41  | 485  | 525  |
| Tc00.1047053504099.50 | <i>T. cruzi</i> | 48  | 1    | 48   |
| Tc00.1047053504101.10 | <i>T. cruzi</i> | 96  | 88   | 183  |
| Tc00.1047053504101.10 | <i>T. cruzi</i> | 64  | 242  | 305  |
| Tc00.1047053504101.10 | <i>T. cruzi</i> | 78  | 321  | 398  |
| Tc00.1047053504101.50 | <i>T. cruzi</i> | 52  | 128  | 179  |

|                        |                 |     |      |      |
|------------------------|-----------------|-----|------|------|
| Tc00.1047053504101.50  | <i>T. cruzi</i> | 74  | 256  | 329  |
| Tc00.1047053504101.50  | <i>T. cruzi</i> | 74  | 256  | 329  |
| Tc00.1047053504103.10  | <i>T. cruzi</i> | 176 | 70   | 245  |
| Tc00.1047053504103.100 | <i>T. cruzi</i> | 46  | 71   | 116  |
| Tc00.1047053504103.20  | <i>T. cruzi</i> | 50  | 956  | 1005 |
| Tc00.1047053504103.30  | <i>T. cruzi</i> | 89  | 876  | 964  |
| Tc00.1047053504103.30  | <i>T. cruzi</i> | 60  | 1017 | 1076 |
| Tc00.1047053504103.30  | <i>T. cruzi</i> | 60  | 1017 | 1076 |
| Tc00.1047053504103.40  | <i>T. cruzi</i> | 60  | 384  | 443  |
| Tc00.1047053504103.50  | <i>T. cruzi</i> | 57  | 76   | 132  |
| Tc00.1047053504103.50  | <i>T. cruzi</i> | 46  | 188  | 233  |
| Tc00.1047053504103.50  | <i>T. cruzi</i> | 71  | 273  | 343  |
| Tc00.1047053504103.70  | <i>T. cruzi</i> | 41  | 49   | 89   |
| Tc00.1047053504103.70  | <i>T. cruzi</i> | 46  | 309  | 354  |
| Tc00.1047053504103.70  | <i>T. cruzi</i> | 46  | 309  | 354  |
| Tc00.1047053504103.80  | <i>T. cruzi</i> | 43  | 31   | 73   |
| Tc00.1047053504103.90  | <i>T. cruzi</i> | 85  | 81   | 165  |
| Tc00.1047053504103.90  | <i>T. cruzi</i> | 86  | 177  | 262  |
| Tc00.1047053504111.10  | <i>T. cruzi</i> | 161 | 1    | 161  |
| Tc00.1047053504111.10  | <i>T. cruzi</i> | 78  | 452  | 529  |
| Tc00.1047053504111.10  | <i>T. cruzi</i> | 56  | 549  | 604  |
| Tc00.1047053504111.10  | <i>T. cruzi</i> | 148 | 644  | 791  |
| Tc00.1047053504111.20  | <i>T. cruzi</i> | 45  | 68   | 112  |
| Tc00.1047053504111.30  | <i>T. cruzi</i> | 62  | 277  | 338  |
| Tc00.1047053504111.30  | <i>T. cruzi</i> | 40  | 527  | 566  |
| Tc00.1047053504111.30  | <i>T. cruzi</i> | 46  | 607  | 652  |
| Tc00.1047053504111.30  | <i>T. cruzi</i> | 53  | 845  | 897  |
| Tc00.1047053504111.30  | <i>T. cruzi</i> | 113 | 1018 | 1130 |
| Tc00.1047053504111.49  | <i>T. cruzi</i> | 101 | 1    | 101  |
| Tc00.1047053504111.49  | <i>T. cruzi</i> | 66  | 133  | 198  |
| Tc00.1047053504117.9   | <i>T. cruzi</i> | 79  | 67   | 145  |
| Tc00.1047053504119.10  | <i>T. cruzi</i> | 72  | 160  | 231  |
| Tc00.1047053504119.20  | <i>T. cruzi</i> | 47  | 198  | 244  |
| Tc00.1047053504119.20  | <i>T. cruzi</i> | 60  | 468  | 527  |
| Tc00.1047053504119.20  | <i>T. cruzi</i> | 60  | 468  | 527  |
| Tc00.1047053504125.120 | <i>T. cruzi</i> | 58  | 1    | 58   |
| Tc00.1047053504125.120 | <i>T. cruzi</i> | 54  | 172  | 225  |
| Tc00.1047053504125.120 | <i>T. cruzi</i> | 54  | 172  | 225  |
| Tc00.1047053504125.20  | <i>T. cruzi</i> | 75  | 651  | 725  |
| Tc00.1047053504125.30  | <i>T. cruzi</i> | 52  | 42   | 93   |
| Tc00.1047053504125.30  | <i>T. cruzi</i> | 141 | 458  | 598  |
| Tc00.1047053504125.30  | <i>T. cruzi</i> | 110 | 618  | 727  |
| Tc00.1047053504125.60  | <i>T. cruzi</i> | 150 | 316  | 465  |
| Tc00.1047053504125.64  | <i>T. cruzi</i> | 192 | 218  | 409  |
| Tc00.1047053504125.70  | <i>T. cruzi</i> | 42  | 1    | 42   |
| Tc00.1047053504125.70  | <i>T. cruzi</i> | 109 | 190  | 298  |
| Tc00.1047053504125.70  | <i>T. cruzi</i> | 72  | 355  | 426  |



|                        |                 |     |     |     |
|------------------------|-----------------|-----|-----|-----|
| Tc00.1047053504125.70  | <i>T. cruzi</i> | 54  | 429 | 482 |
| Tc00.1047053504125.70  | <i>T. cruzi</i> | 55  | 564 | 618 |
| Tc00.1047053504125.80  | <i>T. cruzi</i> | 40  | 368 | 407 |
| Tc00.1047053504125.90  | <i>T. cruzi</i> | 124 | 61  | 184 |
| Tc00.1047053504125.90  | <i>T. cruzi</i> | 164 | 494 | 657 |
| Tc00.1047053504125.90  | <i>T. cruzi</i> | 53  | 695 | 747 |
| Tc00.1047053504127.20  | <i>T. cruzi</i> | 197 | 145 | 341 |
| Tc00.1047053504129.20  | <i>T. cruzi</i> | 44  | 293 | 336 |
| Tc00.1047053504129.20  | <i>T. cruzi</i> | 40  | 789 | 828 |
| Tc00.1047053504129.20  | <i>T. cruzi</i> | 40  | 789 | 828 |
| Tc00.1047053504129.30  | <i>T. cruzi</i> | 99  | 281 | 379 |
| Tc00.1047053504133.15  | <i>T. cruzi</i> | 58  | 1   | 58  |
| Tc00.1047053504133.15  | <i>T. cruzi</i> | 142 | 141 | 282 |
| Tc00.1047053504133.15  | <i>T. cruzi</i> | 221 | 309 | 529 |
| Tc00.1047053504133.30  | <i>T. cruzi</i> | 104 | 140 | 243 |
| Tc00.1047053504133.30  | <i>T. cruzi</i> | 40  | 552 | 591 |
| Tc00.1047053504137.110 | <i>T. cruzi</i> | 60  | 101 | 160 |
| Tc00.1047053504137.110 | <i>T. cruzi</i> | 61  | 359 | 419 |
| Tc00.1047053504137.110 | <i>T. cruzi</i> | 41  | 634 | 674 |
| Tc00.1047053504137.120 | <i>T. cruzi</i> | 50  | 59  | 108 |
| Tc00.1047053504137.120 | <i>T. cruzi</i> | 47  | 262 | 308 |
| Tc00.1047053504137.120 | <i>T. cruzi</i> | 47  | 262 | 308 |
| Tc00.1047053504137.150 | <i>T. cruzi</i> | 40  | 1   | 40  |
| Tc00.1047053504137.160 | <i>T. cruzi</i> | 48  | 41  | 88  |
| Tc00.1047053504137.160 | <i>T. cruzi</i> | 56  | 271 | 326 |
| Tc00.1047053504137.160 | <i>T. cruzi</i> | 56  | 271 | 326 |
| Tc00.1047053504137.30  | <i>T. cruzi</i> | 87  | 63  | 149 |
| Tc00.1047053504137.30  | <i>T. cruzi</i> | 41  | 409 | 449 |
| Tc00.1047053504137.30  | <i>T. cruzi</i> | 73  | 494 | 566 |
| Tc00.1047053504137.40  | <i>T. cruzi</i> | 130 | 1   | 130 |
| Tc00.1047053504137.50  | <i>T. cruzi</i> | 83  | 1   | 83  |
| Tc00.1047053504137.50  | <i>T. cruzi</i> | 64  | 126 | 189 |
| Tc00.1047053504137.50  | <i>T. cruzi</i> | 64  | 126 | 189 |
| Tc00.1047053504137.60  | <i>T. cruzi</i> | 84  | 590 | 673 |
| Tc00.1047053504137.70  | <i>T. cruzi</i> | 147 | 66  | 212 |
| Tc00.1047053504137.80  | <i>T. cruzi</i> | 40  | 56  | 95  |
| Tc00.1047053504137.90  | <i>T. cruzi</i> | 66  | 87  | 152 |
| Tc00.1047053504143.20  | <i>T. cruzi</i> | 88  | 28  | 115 |
| Tc00.1047053504143.20  | <i>T. cruzi</i> | 165 | 139 | 303 |
| Tc00.1047053504147.130 | <i>T. cruzi</i> | 126 | 50  | 175 |
| Tc00.1047053504147.140 | <i>T. cruzi</i> | 60  | 1   | 60  |
| Tc00.1047053504147.140 | <i>T. cruzi</i> | 160 | 105 | 264 |
| Tc00.1047053504147.150 | <i>T. cruzi</i> | 136 | 1   | 136 |
| Tc00.1047053504147.150 | <i>T. cruzi</i> | 88  | 239 | 326 |
| Tc00.1047053504147.150 | <i>T. cruzi</i> | 106 | 445 | 550 |
| Tc00.1047053504147.150 | <i>T. cruzi</i> | 107 | 760 | 866 |
| Tc00.1047053504147.180 | <i>T. cruzi</i> | 51  | 44  | 94  |

|                        |                 |     |      |      |
|------------------------|-----------------|-----|------|------|
| Tc00.1047053504147.190 | <i>T. cruzi</i> | 73  | 1137 | 1209 |
| Tc00.1047053504147.20  | <i>T. cruzi</i> | 47  | 147  | 193  |
| Tc00.1047053504147.200 | <i>T. cruzi</i> | 45  | 26   | 70   |
| Tc00.1047053504147.210 | <i>T. cruzi</i> | 102 | 14   | 115  |
| Tc00.1047053504147.210 | <i>T. cruzi</i> | 57  | 119  | 175  |
| Tc00.1047053504147.210 | <i>T. cruzi</i> | 76  | 244  | 319  |
| Tc00.1047053504147.224 | <i>T. cruzi</i> | 222 | 1    | 222  |
| Tc00.1047053504147.224 | <i>T. cruzi</i> | 149 | 250  | 398  |
| Tc00.1047053504147.240 | <i>T. cruzi</i> | 143 | 1    | 143  |
| Tc00.1047053504147.240 | <i>T. cruzi</i> | 76  | 1108 | 1183 |
| Tc00.1047053504147.250 | <i>T. cruzi</i> | 131 | 721  | 851  |
| Tc00.1047053504147.250 | <i>T. cruzi</i> | 55  | 1368 | 1422 |
| Tc00.1047053504147.250 | <i>T. cruzi</i> | 55  | 1368 | 1422 |
| Tc00.1047053504147.280 | <i>T. cruzi</i> | 47  | 183  | 229  |
| Tc00.1047053504147.30  | <i>T. cruzi</i> | 45  | 194  | 238  |
| Tc00.1047053504147.320 | <i>T. cruzi</i> | 57  | 1    | 57   |
| Tc00.1047053504147.330 | <i>T. cruzi</i> | 54  | 1339 | 1392 |
| Tc00.1047053504147.340 | <i>T. cruzi</i> | 145 | 1    | 145  |
| Tc00.1047053504147.340 | <i>T. cruzi</i> | 79  | 183  | 261  |
| Tc00.1047053504147.340 | <i>T. cruzi</i> | 50  | 286  | 335  |
| Tc00.1047053504147.40  | <i>T. cruzi</i> | 61  | 35   | 95   |
| Tc00.1047053504147.60  | <i>T. cruzi</i> | 95  | 172  | 266  |
| Tc00.1047053504147.80  | <i>T. cruzi</i> | 54  | 12   | 65   |
| Tc00.1047053504147.80  | <i>T. cruzi</i> | 44  | 162  | 205  |
| Tc00.1047053504147.80  | <i>T. cruzi</i> | 44  | 162  | 205  |
| Tc00.1047053504147.90  | <i>T. cruzi</i> | 64  | 1    | 64   |
| Tc00.1047053504147.99  | <i>T. cruzi</i> | 66  | 156  | 221  |
| Tc00.1047053504149.100 | <i>T. cruzi</i> | 157 | 294  | 450  |
| Tc00.1047053504149.110 | <i>T. cruzi</i> | 58  | 169  | 226  |
| Tc00.1047053504149.117 | <i>T. cruzi</i> | 89  | 76   | 164  |
| Tc00.1047053504149.124 | <i>T. cruzi</i> | 52  | 1    | 52   |
| Tc00.1047053504149.124 | <i>T. cruzi</i> | 64  | 127  | 190  |
| Tc00.1047053504149.124 | <i>T. cruzi</i> | 64  | 127  | 190  |
| Tc00.1047053504149.130 | <i>T. cruzi</i> | 56  | 177  | 232  |
| Tc00.1047053504149.140 | <i>T. cruzi</i> | 45  | 1    | 45   |
| Tc00.1047053504149.150 | <i>T. cruzi</i> | 41  | 122  | 162  |
| Tc00.1047053504149.150 | <i>T. cruzi</i> | 113 | 282  | 394  |
| Tc00.1047053504149.150 | <i>T. cruzi</i> | 113 | 282  | 394  |
| Tc00.1047053504149.160 | <i>T. cruzi</i> | 99  | 383  | 481  |
| Tc00.1047053504149.20  | <i>T. cruzi</i> | 43  | 41   | 83   |
| Tc00.1047053504149.30  | <i>T. cruzi</i> | 56  | 253  | 308  |
| Tc00.1047053504149.50  | <i>T. cruzi</i> | 84  | 35   | 118  |
| Tc00.1047053504149.90  | <i>T. cruzi</i> | 101 | 116  | 216  |
| Tc00.1047053504149.90  | <i>T. cruzi</i> | 58  | 249  | 306  |
| Tc00.1047053504149.90  | <i>T. cruzi</i> | 47  | 555  | 601  |
| Tc00.1047053504149.90  | <i>T. cruzi</i> | 72  | 708  | 779  |
| Tc00.1047053504149.90  | <i>T. cruzi</i> | 56  | 904  | 959  |

|                        |                 |     |      |      |
|------------------------|-----------------|-----|------|------|
| Tc00.1047053504151.20  | <i>T. cruzi</i> | 51  | 61   | 111  |
| Tc00.1047053504151.20  | <i>T. cruzi</i> | 55  | 178  | 232  |
| Tc00.1047053504151.20  | <i>T. cruzi</i> | 55  | 178  | 232  |
| Tc00.1047053504151.30  | <i>T. cruzi</i> | 49  | 307  | 355  |
| Tc00.1047053504151.39  | <i>T. cruzi</i> | 44  | 49   | 92   |
| Tc00.1047053504151.39  | <i>T. cruzi</i> | 72  | 160  | 231  |
| Tc00.1047053504151.39  | <i>T. cruzi</i> | 43  | 369  | 411  |
| Tc00.1047053504151.50  | <i>T. cruzi</i> | 131 | 24   | 154  |
| Tc00.1047053504151.69  | <i>T. cruzi</i> | 47  | 351  | 397  |
| Tc00.1047053504153.110 | <i>T. cruzi</i> | 124 | 128  | 251  |
| Tc00.1047053504153.120 | <i>T. cruzi</i> | 55  | 1150 | 1204 |
| Tc00.1047053504153.150 | <i>T. cruzi</i> | 63  | 393  | 455  |
| Tc00.1047053504153.150 | <i>T. cruzi</i> | 105 | 624  | 728  |
| Tc00.1047053504153.150 | <i>T. cruzi</i> | 56  | 1152 | 1207 |
| Tc00.1047053504153.170 | <i>T. cruzi</i> | 68  | 1    | 68   |
| Tc00.1047053504153.170 | <i>T. cruzi</i> | 45  | 529  | 573  |
| Tc00.1047053504153.170 | <i>T. cruzi</i> | 63  | 963  | 1025 |
| Tc00.1047053504153.170 | <i>T. cruzi</i> | 82  | 1046 | 1127 |
| Tc00.1047053504153.170 | <i>T. cruzi</i> | 116 | 1136 | 1251 |
| Tc00.1047053504153.190 | <i>T. cruzi</i> | 51  | 119  | 169  |
| Tc00.1047053504153.190 | <i>T. cruzi</i> | 74  | 296  | 369  |
| Tc00.1047053504153.190 | <i>T. cruzi</i> | 41  | 458  | 498  |
| Tc00.1047053504153.210 | <i>T. cruzi</i> | 108 | 102  | 209  |
| Tc00.1047053504153.220 | <i>T. cruzi</i> | 41  | 36   | 76   |
| Tc00.1047053504153.230 | <i>T. cruzi</i> | 65  | 314  | 378  |
| Tc00.1047053504153.240 | <i>T. cruzi</i> | 66  | 239  | 304  |
| Tc00.1047053504153.240 | <i>T. cruzi</i> | 70  | 455  | 524  |
| Tc00.1047053504153.240 | <i>T. cruzi</i> | 70  | 455  | 524  |
| Tc00.1047053504153.260 | <i>T. cruzi</i> | 61  | 93   | 153  |
| Tc00.1047053504153.260 | <i>T. cruzi</i> | 73  | 437  | 509  |
| Tc00.1047053504153.260 | <i>T. cruzi</i> | 59  | 590  | 648  |
| Tc00.1047053504153.270 | <i>T. cruzi</i> | 53  | 63   | 115  |
| Tc00.1047053504153.270 | <i>T. cruzi</i> | 82  | 309  | 390  |
| Tc00.1047053504153.270 | <i>T. cruzi</i> | 166 | 690  | 855  |
| Tc00.1047053504153.270 | <i>T. cruzi</i> | 42  | 871  | 912  |
| Tc00.1047053504153.280 | <i>T. cruzi</i> | 63  | 1    | 63   |
| Tc00.1047053504153.280 | <i>T. cruzi</i> | 142 | 105  | 246  |
| Tc00.1047053504153.280 | <i>T. cruzi</i> | 132 | 279  | 410  |
| Tc00.1047053504153.30  | <i>T. cruzi</i> | 58  | 113  | 170  |
| Tc00.1047053504153.30  | <i>T. cruzi</i> | 58  | 212  | 269  |
| Tc00.1047053504153.300 | <i>T. cruzi</i> | 139 | 1    | 139  |
| Tc00.1047053504153.310 | <i>T. cruzi</i> | 120 | 1    | 120  |
| Tc00.1047053504153.320 | <i>T. cruzi</i> | 155 | 242  | 396  |
| Tc00.1047053504153.320 | <i>T. cruzi</i> | 63  | 414  | 476  |
| Tc00.1047053504153.330 | <i>T. cruzi</i> | 47  | 1    | 47   |
| Tc00.1047053504153.330 | <i>T. cruzi</i> | 116 | 207  | 322  |
| Tc00.1047053504153.330 | <i>T. cruzi</i> | 116 | 207  | 322  |

|                        |                 |     |      |      |
|------------------------|-----------------|-----|------|------|
| Tc00.1047053504153.70  | <i>T. cruzi</i> | 42  | 267  | 308  |
| Tc00.1047053504159.10  | <i>T. cruzi</i> | 726 | 1    | 726  |
| Tc00.1047053504159.10  | <i>T. cruzi</i> | 56  | 853  | 908  |
| Tc00.1047053504159.50  | <i>T. cruzi</i> | 149 | 1    | 149  |
| Tc00.1047053504159.60  | <i>T. cruzi</i> | 82  | 103  | 184  |
| Tc00.1047053504159.60  | <i>T. cruzi</i> | 100 | 242  | 341  |
| Tc00.1047053504159.80  | <i>T. cruzi</i> | 73  | 447  | 519  |
| Tc00.1047053504159.90  | <i>T. cruzi</i> | 62  | 1    | 62   |
| Tc00.1047053504159.90  | <i>T. cruzi</i> | 269 | 353  | 621  |
| Tc00.1047053504159.90  | <i>T. cruzi</i> | 81  | 756  | 836  |
| Tc00.1047053504159.90  | <i>T. cruzi</i> | 66  | 868  | 933  |
| Tc00.1047053504163.100 | <i>T. cruzi</i> | 44  | 86   | 129  |
| Tc00.1047053504163.100 | <i>T. cruzi</i> | 67  | 221  | 287  |
| Tc00.1047053504163.100 | <i>T. cruzi</i> | 67  | 221  | 287  |
| Tc00.1047053504163.60  | <i>T. cruzi</i> | 54  | 1    | 54   |
| Tc00.1047053504163.60  | <i>T. cruzi</i> | 57  | 133  | 189  |
| Tc00.1047053504163.60  | <i>T. cruzi</i> | 57  | 133  | 189  |
| Tc00.1047053504163.70  | <i>T. cruzi</i> | 88  | 25   | 112  |
| Tc00.1047053504163.70  | <i>T. cruzi</i> | 53  | 280  | 332  |
| Tc00.1047053504163.80  | <i>T. cruzi</i> | 140 | 97   | 236  |
| Tc00.1047053504163.90  | <i>T. cruzi</i> | 95  | 1    | 95   |
| Tc00.1047053504163.90  | <i>T. cruzi</i> | 53  | 100  | 152  |
| Tc00.1047053504163.90  | <i>T. cruzi</i> | 194 | 166  | 359  |
| Tc00.1047053504165.20  | <i>T. cruzi</i> | 47  | 1    | 47   |
| Tc00.1047053504167.14  | <i>T. cruzi</i> | 42  | 182  | 223  |
| Tc00.1047053504167.20  | <i>T. cruzi</i> | 133 | 19   | 151  |
| Tc00.1047053504171.30  | <i>T. cruzi</i> | 57  | 275  | 331  |
| Tc00.1047053504171.50  | <i>T. cruzi</i> | 50  | 685  | 734  |
| Tc00.1047053504171.50  | <i>T. cruzi</i> | 54  | 1245 | 1298 |
| Tc00.1047053504171.50  | <i>T. cruzi</i> | 54  | 1245 | 1298 |
| Tc00.1047053504171.59  | <i>T. cruzi</i> | 63  | 70   | 132  |
| Tc00.1047053504179.30  | <i>T. cruzi</i> | 114 | 244  | 357  |
| Tc00.1047053504179.40  | <i>T. cruzi</i> | 112 | 635  | 746  |
| Tc00.1047053504179.50  | <i>T. cruzi</i> | 147 | 1    | 147  |
| Tc00.1047053504179.50  | <i>T. cruzi</i> | 66  | 337  | 402  |
| Tc00.1047053504179.50  | <i>T. cruzi</i> | 51  | 578  | 628  |
| Tc00.1047053504179.50  | <i>T. cruzi</i> | 47  | 801  | 847  |
| Tc00.1047053504179.60  | <i>T. cruzi</i> | 40  | 75   | 114  |
| Tc00.1047053504179.90  | <i>T. cruzi</i> | 420 | 35   | 454  |
| Tc00.1047053504179.90  | <i>T. cruzi</i> | 44  | 483  | 526  |
| Tc00.1047053504193.15  | <i>T. cruzi</i> | 42  | 1    | 42   |
| Tc00.1047053504203.10  | <i>T. cruzi</i> | 276 | 80   | 355  |
| Tc00.1047053504203.4   | <i>T. cruzi</i> | 45  | 1    | 45   |
| Tc00.1047053504203.40  | <i>T. cruzi</i> | 45  | 15   | 59   |
| Tc00.1047053504203.50  | <i>T. cruzi</i> | 54  | 41   | 94   |
| Tc00.1047053504203.50  | <i>T. cruzi</i> | 169 | 123  | 291  |
| Tc00.1047053504203.60  | <i>T. cruzi</i> | 52  | 93   | 144  |

|                        |                 |     |     |     |
|------------------------|-----------------|-----|-----|-----|
| Tc00.1047053504203.60  | <i>T. cruzi</i> | 76  | 183 | 258 |
| Tc00.1047053504203.60  | <i>T. cruzi</i> | 76  | 183 | 258 |
| Tc00.1047053504213.10  | <i>T. cruzi</i> | 234 | 162 | 395 |
| Tc00.1047053504213.100 | <i>T. cruzi</i> | 278 | 60  | 337 |
| Tc00.1047053504213.100 | <i>T. cruzi</i> | 42  | 399 | 440 |
| Tc00.1047053504213.110 | <i>T. cruzi</i> | 76  | 538 | 613 |
| Tc00.1047053504213.120 | <i>T. cruzi</i> | 43  | 244 | 286 |
| Tc00.1047053504213.130 | <i>T. cruzi</i> | 43  | 119 | 161 |
| Tc00.1047053504213.20  | <i>T. cruzi</i> | 248 | 1   | 248 |
| Tc00.1047053504213.20  | <i>T. cruzi</i> | 52  | 407 | 458 |
| Tc00.1047053504213.40  | <i>T. cruzi</i> | 54  | 272 | 325 |
| Tc00.1047053504213.50  | <i>T. cruzi</i> | 46  | 1   | 46  |
| Tc00.1047053504213.60  | <i>T. cruzi</i> | 199 | 1   | 199 |
| Tc00.1047053504213.60  | <i>T. cruzi</i> | 63  | 236 | 298 |
| Tc00.1047053504213.60  | <i>T. cruzi</i> | 179 | 308 | 486 |
| Tc00.1047053504213.60  | <i>T. cruzi</i> | 182 | 551 | 732 |
| Tc00.1047053504213.60  | <i>T. cruzi</i> | 41  | 764 | 804 |
| Tc00.1047053504213.60  | <i>T. cruzi</i> | 68  | 906 | 973 |
| Tc00.1047053504213.70  | <i>T. cruzi</i> | 122 | 305 | 426 |
| Tc00.1047053504213.70  | <i>T. cruzi</i> | 224 | 457 | 680 |
| Tc00.1047053504213.90  | <i>T. cruzi</i> | 343 | 1   | 343 |
| Tc00.1047053504213.90  | <i>T. cruzi</i> | 99  | 375 | 473 |
| Tc00.1047053504213.90  | <i>T. cruzi</i> | 41  | 504 | 544 |
| Tc00.1047053504215.10  | <i>T. cruzi</i> | 95  | 1   | 95  |
| Tc00.1047053504215.10  | <i>T. cruzi</i> | 57  | 514 | 570 |
| Tc00.1047053504215.30  | <i>T. cruzi</i> | 71  | 26  | 96  |
| Tc00.1047053504215.50  | <i>T. cruzi</i> | 88  | 114 | 201 |
| Tc00.1047053504215.50  | <i>T. cruzi</i> | 209 | 287 | 495 |
| Tc00.1047053504215.50  | <i>T. cruzi</i> | 61  | 500 | 560 |
| Tc00.1047053504215.59  | <i>T. cruzi</i> | 53  | 144 | 196 |
| Tc00.1047053504219.70  | <i>T. cruzi</i> | 45  | 72  | 116 |
| Tc00.1047053504227.10  | <i>T. cruzi</i> | 135 | 1   | 135 |
| Tc00.1047053504229.4   | <i>T. cruzi</i> | 57  | 403 | 459 |
| Tc00.1047053504229.70  | <i>T. cruzi</i> | 42  | 1   | 42  |
| Tc00.1047053504239.100 | <i>T. cruzi</i> | 195 | 19  | 213 |
| Tc00.1047053504239.110 | <i>T. cruzi</i> | 232 | 27  | 258 |
| Tc00.1047053504239.150 | <i>T. cruzi</i> | 100 | 1   | 100 |
| Tc00.1047053504239.150 | <i>T. cruzi</i> | 172 | 103 | 274 |
| Tc00.1047053504239.171 | <i>T. cruzi</i> | 140 | 23  | 162 |
| Tc00.1047053504239.180 | <i>T. cruzi</i> | 66  | 165 | 230 |
| Tc00.1047053504239.20  | <i>T. cruzi</i> | 195 | 19  | 213 |
| Tc00.1047053504239.210 | <i>T. cruzi</i> | 79  | 66  | 144 |
| Tc00.1047053504239.220 | <i>T. cruzi</i> | 437 | 49  | 485 |
| Tc00.1047053504239.230 | <i>T. cruzi</i> | 221 | 1   | 221 |
| Tc00.1047053504239.260 | <i>T. cruzi</i> | 94  | 1   | 94  |
| Tc00.1047053504239.260 | <i>T. cruzi</i> | 49  | 132 | 180 |
| Tc00.1047053504239.260 | <i>T. cruzi</i> | 54  | 294 | 347 |

|                        |                 |     |      |      |
|------------------------|-----------------|-----|------|------|
| Tc00.1047053504239.270 | <i>T. cruzi</i> | 137 | 35   | 171  |
| Tc00.1047053504239.280 | <i>T. cruzi</i> | 256 | 112  | 367  |
| Tc00.1047053504239.290 | <i>T. cruzi</i> | 245 | 25   | 269  |
| Tc00.1047053504239.30  | <i>T. cruzi</i> | 410 | 27   | 436  |
| Tc00.1047053504239.340 | <i>T. cruzi</i> | 152 | 28   | 179  |
| Tc00.1047053504239.350 | <i>T. cruzi</i> | 348 | 34   | 381  |
| Tc00.1047053504239.380 | <i>T. cruzi</i> | 45  | 181  | 225  |
| Tc00.1047053504239.410 | <i>T. cruzi</i> | 183 | 1    | 183  |
| Tc00.1047053504239.420 | <i>T. cruzi</i> | 230 | 29   | 258  |
| Tc00.1047053504239.434 | <i>T. cruzi</i> | 50  | 94   | 143  |
| Tc00.1047053504239.434 | <i>T. cruzi</i> | 56  | 254  | 309  |
| Tc00.1047053504239.434 | <i>T. cruzi</i> | 56  | 254  | 309  |
| Tc00.1047053504239.90  | <i>T. cruzi</i> | 41  | 1    | 41   |
| Tc00.1047053504241.34  | <i>T. cruzi</i> | 42  | 244  | 285  |
| Tc00.1047053504241.34  | <i>T. cruzi</i> | 55  | 1618 | 1672 |
| Tc00.1047053504241.34  | <i>T. cruzi</i> | 55  | 1618 | 1672 |
| Tc00.1047053504247.20  | <i>T. cruzi</i> | 54  | 295  | 348  |
| Tc00.1047053504247.20  | <i>T. cruzi</i> | 78  | 394  | 471  |
| Tc00.1047053504247.20  | <i>T. cruzi</i> | 57  | 646  | 702  |
| Tc00.1047053504247.30  | <i>T. cruzi</i> | 61  | 111  | 171  |
| Tc00.1047053504247.34  | <i>T. cruzi</i> | 57  | 1    | 57   |
| Tc00.1047053504247.34  | <i>T. cruzi</i> | 71  | 161  | 231  |
| Tc00.1047053504247.40  | <i>T. cruzi</i> | 70  | 44   | 113  |
| Tc00.1047053504247.40  | <i>T. cruzi</i> | 40  | 521  | 560  |
| Tc00.1047053504247.40  | <i>T. cruzi</i> | 75  | 681  | 755  |
| Tc00.1047053504247.50  | <i>T. cruzi</i> | 115 | 78   | 192  |
| Tc00.1047053504255.10  | <i>T. cruzi</i> | 65  | 1    | 65   |
| Tc00.1047053504255.10  | <i>T. cruzi</i> | 56  | 181  | 236  |
| Tc00.1047053504255.10  | <i>T. cruzi</i> | 56  | 181  | 236  |
| Tc00.1047053504255.20  | <i>T. cruzi</i> | 89  | 1    | 89   |
| Tc00.1047053504255.20  | <i>T. cruzi</i> | 330 | 116  | 445  |
| Tc00.1047053504255.20  | <i>T. cruzi</i> | 165 | 516  | 680  |
| Tc00.1047053504255.30  | <i>T. cruzi</i> | 49  | 1    | 49   |
| Tc00.1047053504255.30  | <i>T. cruzi</i> | 59  | 211  | 269  |
| Tc00.1047053504255.30  | <i>T. cruzi</i> | 143 | 457  | 599  |
| Tc00.1047053504277.11  | <i>T. cruzi</i> | 133 | 43   | 175  |
| Tc00.1047053504277.20  | <i>T. cruzi</i> | 112 | 33   | 144  |
| Tc00.1047053504277.20  | <i>T. cruzi</i> | 101 | 148  | 248  |
| Tc00.1047053504277.20  | <i>T. cruzi</i> | 101 | 148  | 248  |
| Tc00.1047053504277.30  | <i>T. cruzi</i> | 137 | 21   | 157  |
| Tc00.1047053504277.30  | <i>T. cruzi</i> | 160 | 163  | 322  |
| Tc00.1047053504341.10  | <i>T. cruzi</i> | 45  | 1    | 45   |
| Tc00.1047053504341.10  | <i>T. cruzi</i> | 223 | 681  | 903  |
| Tc00.1047053504343.10  | <i>T. cruzi</i> | 48  | 1    | 48   |
| Tc00.1047053504343.10  | <i>T. cruzi</i> | 85  | 695  | 779  |
| Tc00.1047053504421.10  | <i>T. cruzi</i> | 66  | 811  | 876  |
| Tc00.1047053504421.19  | <i>T. cruzi</i> | 78  | 137  | 214  |

|                        |                 |     |      |      |
|------------------------|-----------------|-----|------|------|
| Tc00.1047053504423.10  | <i>T. cruzi</i> | 122 | 4    | 125  |
| Tc00.1047053504423.15  | <i>T. cruzi</i> | 64  | 43   | 106  |
| Tc00.1047053504423.20  | <i>T. cruzi</i> | 66  | 337  | 402  |
| Tc00.1047053504423.30  | <i>T. cruzi</i> | 91  | 64   | 154  |
| Tc00.1047053504423.30  | <i>T. cruzi</i> | 72  | 381  | 452  |
| Tc00.1047053504423.30  | <i>T. cruzi</i> | 156 | 666  | 821  |
| Tc00.1047053504425.10  | <i>T. cruzi</i> | 272 | 689  | 960  |
| Tc00.1047053504425.110 | <i>T. cruzi</i> | 58  | 1    | 58   |
| Tc00.1047053504425.70  | <i>T. cruzi</i> | 54  | 48   | 101  |
| Tc00.1047053504425.70  | <i>T. cruzi</i> | 77  | 425  | 501  |
| Tc00.1047053504425.70  | <i>T. cruzi</i> | 77  | 425  | 501  |
| Tc00.1047053504425.80  | <i>T. cruzi</i> | 145 | 47   | 191  |
| Tc00.1047053504425.80  | <i>T. cruzi</i> | 71  | 243  | 313  |
| Tc00.1047053504425.80  | <i>T. cruzi</i> | 47  | 502  | 548  |
| Tc00.1047053504425.80  | <i>T. cruzi</i> | 66  | 582  | 647  |
| Tc00.1047053504425.80  | <i>T. cruzi</i> | 46  | 666  | 711  |
| Tc00.1047053504425.80  | <i>T. cruzi</i> | 46  | 768  | 813  |
| Tc00.1047053504425.80  | <i>T. cruzi</i> | 53  | 1264 | 1316 |
| Tc00.1047053504425.80  | <i>T. cruzi</i> | 61  | 1420 | 1480 |
| Tc00.1047053504425.90  | <i>T. cruzi</i> | 42  | 239  | 280  |
| Tc00.1047053504427.120 | <i>T. cruzi</i> | 43  | 1    | 43   |
| Tc00.1047053504427.120 | <i>T. cruzi</i> | 135 | 66   | 200  |
| Tc00.1047053504427.120 | <i>T. cruzi</i> | 68  | 236  | 303  |
| Tc00.1047053504427.130 | <i>T. cruzi</i> | 109 | 608  | 716  |
| Tc00.1047053504427.130 | <i>T. cruzi</i> | 109 | 772  | 880  |
| Tc00.1047053504427.140 | <i>T. cruzi</i> | 71  | 111  | 181  |
| Tc00.1047053504427.140 | <i>T. cruzi</i> | 396 | 409  | 804  |
| Tc00.1047053504427.150 | <i>T. cruzi</i> | 45  | 357  | 401  |
| Tc00.1047053504427.170 | <i>T. cruzi</i> | 74  | 116  | 189  |
| Tc00.1047053504427.180 | <i>T. cruzi</i> | 110 | 166  | 275  |
| Tc00.1047053504427.180 | <i>T. cruzi</i> | 303 | 291  | 593  |
| Tc00.1047053504427.180 | <i>T. cruzi</i> | 63  | 670  | 732  |
| Tc00.1047053504427.20  | <i>T. cruzi</i> | 172 | 104  | 275  |
| Tc00.1047053504427.20  | <i>T. cruzi</i> | 63  | 320  | 382  |
| Tc00.1047053504427.20  | <i>T. cruzi</i> | 63  | 320  | 382  |
| Tc00.1047053504427.230 | <i>T. cruzi</i> | 276 | 689  | 964  |
| Tc00.1047053504427.240 | <i>T. cruzi</i> | 45  | 1    | 45   |
| Tc00.1047053504427.240 | <i>T. cruzi</i> | 41  | 319  | 359  |
| Tc00.1047053504427.240 | <i>T. cruzi</i> | 41  | 319  | 359  |
| Tc00.1047053504427.260 | <i>T. cruzi</i> | 79  | 1    | 79   |
| Tc00.1047053504427.260 | <i>T. cruzi</i> | 55  | 499  | 553  |
| Tc00.1047053504427.260 | <i>T. cruzi</i> | 75  | 571  | 645  |
| Tc00.1047053504427.260 | <i>T. cruzi</i> | 101 | 650  | 750  |
| Tc00.1047053504427.270 | <i>T. cruzi</i> | 80  | 210  | 289  |
| Tc00.1047053504427.270 | <i>T. cruzi</i> | 97  | 336  | 432  |
| Tc00.1047053504427.270 | <i>T. cruzi</i> | 91  | 697  | 787  |
| Tc00.1047053504427.280 | <i>T. cruzi</i> | 65  | 1    | 65   |

|                        |                 |     |      |      |
|------------------------|-----------------|-----|------|------|
| Tc00.1047053504427.280 | <i>T. cruzi</i> | 56  | 542  | 597  |
| Tc00.1047053504427.280 | <i>T. cruzi</i> | 43  | 617  | 659  |
| Tc00.1047053504427.30  | <i>T. cruzi</i> | 84  | 46   | 129  |
| Tc00.1047053504427.30  | <i>T. cruzi</i> | 129 | 134  | 262  |
| Tc00.1047053504427.30  | <i>T. cruzi</i> | 113 | 300  | 412  |
| Tc00.1047053504427.30  | <i>T. cruzi</i> | 94  | 465  | 558  |
| Tc00.1047053504427.30  | <i>T. cruzi</i> | 41  | 587  | 627  |
| Tc00.1047053504427.30  | <i>T. cruzi</i> | 335 | 689  | 1023 |
| Tc00.1047053504427.40  | <i>T. cruzi</i> | 124 | 29   | 152  |
| Tc00.1047053504427.50  | <i>T. cruzi</i> | 44  | 1    | 44   |
| Tc00.1047053504427.50  | <i>T. cruzi</i> | 56  | 46   | 101  |
| Tc00.1047053504427.50  | <i>T. cruzi</i> | 56  | 46   | 101  |
| Tc00.1047053504431.10  | <i>T. cruzi</i> | 122 | 37   | 158  |
| Tc00.1047053504431.10  | <i>T. cruzi</i> | 66  | 225  | 290  |
| Tc00.1047053504431.10  | <i>T. cruzi</i> | 66  | 225  | 290  |
| Tc00.1047053504431.109 | <i>T. cruzi</i> | 60  | 128  | 187  |
| Tc00.1047053504431.30  | <i>T. cruzi</i> | 84  | 70   | 153  |
| Tc00.1047053504431.30  | <i>T. cruzi</i> | 180 | 244  | 423  |
| Tc00.1047053504431.40  | <i>T. cruzi</i> | 94  | 71   | 164  |
| Tc00.1047053504431.40  | <i>T. cruzi</i> | 109 | 339  | 447  |
| Tc00.1047053504431.64  | <i>T. cruzi</i> | 83  | 64   | 146  |
| Tc00.1047053504431.64  | <i>T. cruzi</i> | 121 | 150  | 270  |
| Tc00.1047053504431.80  | <i>T. cruzi</i> | 129 | 29   | 157  |
| Tc00.1047053504431.80  | <i>T. cruzi</i> | 65  | 396  | 460  |
| Tc00.1047053504431.80  | <i>T. cruzi</i> | 65  | 396  | 460  |
| Tc00.1047053504449.14  | <i>T. cruzi</i> | 52  | 168  | 219  |
| Tc00.1047053504449.14  | <i>T. cruzi</i> | 57  | 370  | 426  |
| Tc00.1047053504449.14  | <i>T. cruzi</i> | 44  | 1374 | 1417 |
| Tc00.1047053504449.14  | <i>T. cruzi</i> | 75  | 1429 | 1503 |
| Tc00.1047053504449.14  | <i>T. cruzi</i> | 160 | 1649 | 1808 |
| Tc00.1047053504449.14  | <i>T. cruzi</i> | 145 | 1830 | 1974 |
| Tc00.1047053504449.30  | <i>T. cruzi</i> | 101 | 1    | 101  |
| Tc00.1047053504449.30  | <i>T. cruzi</i> | 45  | 722  | 766  |
| Tc00.1047053504507.10  | <i>T. cruzi</i> | 42  | 1    | 42   |
| Tc00.1047053504507.10  | <i>T. cruzi</i> | 93  | 51   | 143  |
| Tc00.1047053504507.10  | <i>T. cruzi</i> | 93  | 51   | 143  |
| Tc00.1047053504557.50  | <i>T. cruzi</i> | 43  | 230  | 272  |
| Tc00.1047053504557.50  | <i>T. cruzi</i> | 58  | 1611 | 1668 |
| Tc00.1047053504557.50  | <i>T. cruzi</i> | 58  | 1611 | 1668 |
| Tc00.1047053504625.10  | <i>T. cruzi</i> | 78  | 277  | 354  |
| Tc00.1047053504625.20  | <i>T. cruzi</i> | 45  | 50   | 94   |
| Tc00.1047053504625.20  | <i>T. cruzi</i> | 59  | 254  | 312  |
| Tc00.1047053504625.20  | <i>T. cruzi</i> | 42  | 341  | 382  |
| Tc00.1047053504625.30  | <i>T. cruzi</i> | 62  | 1    | 62   |
| Tc00.1047053504625.30  | <i>T. cruzi</i> | 100 | 91   | 190  |
| Tc00.1047053504625.30  | <i>T. cruzi</i> | 60  | 233  | 292  |
| Tc00.1047053504625.30  | <i>T. cruzi</i> | 134 | 320  | 453  |



|                        |                 |     |      |      |
|------------------------|-----------------|-----|------|------|
| Tc00.1047053504625.40  | <i>T. cruzi</i> | 41  | 868  | 908  |
| Tc00.1047053504625.40  | <i>T. cruzi</i> | 42  | 911  | 952  |
| Tc00.1047053504625.40  | <i>T. cruzi</i> | 42  | 911  | 952  |
| Tc00.1047053504625.70  | <i>T. cruzi</i> | 99  | 182  | 280  |
| Tc00.1047053504625.70  | <i>T. cruzi</i> | 509 | 327  | 835  |
| Tc00.1047053504625.70  | <i>T. cruzi</i> | 46  | 907  | 952  |
| Tc00.1047053504625.80  | <i>T. cruzi</i> | 54  | 13   | 66   |
| Tc00.1047053504625.80  | <i>T. cruzi</i> | 83  | 169  | 251  |
| Tc00.1047053504625.90  | <i>T. cruzi</i> | 45  | 1    | 45   |
| Tc00.1047053504625.90  | <i>T. cruzi</i> | 72  | 214  | 285  |
| Tc00.1047053504625.90  | <i>T. cruzi</i> | 72  | 214  | 285  |
| Tc00.1047053504643.20  | <i>T. cruzi</i> | 59  | 1    | 59   |
| Tc00.1047053504643.30  | <i>T. cruzi</i> | 48  | 164  | 211  |
| Tc00.1047053504643.49  | <i>T. cruzi</i> | 68  | 52   | 119  |
| Tc00.1047053504765.9   | <i>T. cruzi</i> | 95  | 66   | 160  |
| Tc00.1047053504769.10  | <i>T. cruzi</i> | 250 | 14   | 263  |
| Tc00.1047053504769.100 | <i>T. cruzi</i> | 40  | 1    | 40   |
| Tc00.1047053504769.100 | <i>T. cruzi</i> | 68  | 685  | 752  |
| Tc00.1047053504769.140 | <i>T. cruzi</i> | 91  | 237  | 327  |
| Tc00.1047053504769.160 | <i>T. cruzi</i> | 42  | 156  | 197  |
| Tc00.1047053504769.160 | <i>T. cruzi</i> | 52  | 1531 | 1582 |
| Tc00.1047053504769.160 | <i>T. cruzi</i> | 64  | 2764 | 2827 |
| Tc00.1047053504769.160 | <i>T. cruzi</i> | 51  | 3301 | 3351 |
| Tc00.1047053504769.20  | <i>T. cruzi</i> | 198 | 53   | 250  |
| Tc00.1047053504769.60  | <i>T. cruzi</i> | 97  | 1    | 97   |
| Tc00.1047053504769.70  | <i>T. cruzi</i> | 42  | 106  | 147  |
| Tc00.1047053504769.70  | <i>T. cruzi</i> | 86  | 217  | 302  |
| Tc00.1047053504769.70  | <i>T. cruzi</i> | 86  | 217  | 302  |
| Tc00.1047053504769.80  | <i>T. cruzi</i> | 111 | 1    | 111  |
| Tc00.1047053504769.80  | <i>T. cruzi</i> | 439 | 118  | 556  |
| Tc00.1047053504769.80  | <i>T. cruzi</i> | 74  | 574  | 647  |
| Tc00.1047053504835.29  | <i>T. cruzi</i> | 585 | 28   | 612  |
| Tc00.1047053504835.29  | <i>T. cruzi</i> | 40  | 626  | 665  |
| Tc00.1047053504867.10  | <i>T. cruzi</i> | 71  | 1    | 71   |
| Tc00.1047053504867.10  | <i>T. cruzi</i> | 43  | 78   | 120  |
| Tc00.1047053504867.10  | <i>T. cruzi</i> | 42  | 191  | 232  |
| Tc00.1047053504867.120 | <i>T. cruzi</i> | 60  | 770  | 829  |
| Tc00.1047053504867.120 | <i>T. cruzi</i> | 119 | 848  | 966  |
| Tc00.1047053504867.120 | <i>T. cruzi</i> | 70  | 972  | 1041 |
| Tc00.1047053504867.129 | <i>T. cruzi</i> | 88  | 1    | 88   |
| Tc00.1047053504867.20  | <i>T. cruzi</i> | 47  | 138  | 184  |
| Tc00.1047053504867.20  | <i>T. cruzi</i> | 47  | 286  | 332  |
| Tc00.1047053504867.20  | <i>T. cruzi</i> | 42  | 437  | 478  |
| Tc00.1047053504867.30  | <i>T. cruzi</i> | 64  | 67   | 130  |
| Tc00.1047053504867.50  | <i>T. cruzi</i> | 248 | 216  | 463  |
| Tc00.1047053504867.50  | <i>T. cruzi</i> | 81  | 502  | 582  |
| Tc00.1047053504867.60  | <i>T. cruzi</i> | 207 | 153  | 359  |

|                        |                 |     |      |      |
|------------------------|-----------------|-----|------|------|
| Tc00.1047053504867.60  | <i>T. cruzi</i> | 122 | 462  | 583  |
| Tc00.1047053504867.60  | <i>T. cruzi</i> | 108 | 657  | 764  |
| Tc00.1047053504867.80  | <i>T. cruzi</i> | 49  | 528  | 576  |
| Tc00.1047053504867.90  | <i>T. cruzi</i> | 94  | 1    | 94   |
| Tc00.1047053504881.20  | <i>T. cruzi</i> | 66  | 344  | 409  |
| Tc00.1047053504881.30  | <i>T. cruzi</i> | 47  | 1    | 47   |
| Tc00.1047053504881.30  | <i>T. cruzi</i> | 91  | 97   | 187  |
| Tc00.1047053504881.30  | <i>T. cruzi</i> | 56  | 363  | 418  |
| Tc00.1047053504881.30  | <i>T. cruzi</i> | 379 | 429  | 807  |
| Tc00.1047053504881.30  | <i>T. cruzi</i> | 41  | 835  | 875  |
| Tc00.1047053504881.30  | <i>T. cruzi</i> | 240 | 917  | 1156 |
| Tc00.1047053504881.30  | <i>T. cruzi</i> | 65  | 1161 | 1225 |
| Tc00.1047053504881.30  | <i>T. cruzi</i> | 330 | 1245 | 1574 |
| Tc00.1047053504881.40  | <i>T. cruzi</i> | 102 | 577  | 678  |
| Tc00.1047053504881.50  | <i>T. cruzi</i> | 40  | 1    | 40   |
| Tc00.1047053504883.10  | <i>T. cruzi</i> | 317 | 367  | 683  |
| Tc00.1047053504883.30  | <i>T. cruzi</i> | 106 | 1    | 106  |
| Tc00.1047053504883.30  | <i>T. cruzi</i> | 95  | 410  | 504  |
| Tc00.1047053504883.40  | <i>T. cruzi</i> | 43  | 159  | 201  |
| Tc00.1047053504883.50  | <i>T. cruzi</i> | 43  | 308  | 350  |
| Tc00.1047053504883.60  | <i>T. cruzi</i> | 57  | 152  | 208  |
| Tc00.1047053504929.5   | <i>T. cruzi</i> | 86  | 179  | 264  |
| Tc00.1047053504935.20  | <i>T. cruzi</i> | 61  | 41   | 101  |
| Tc00.1047053505007.10  | <i>T. cruzi</i> | 94  | 1    | 94   |
| Tc00.1047053505007.10  | <i>T. cruzi</i> | 172 | 217  | 388  |
| Tc00.1047053505007.10  | <i>T. cruzi</i> | 67  | 505  | 571  |
| Tc00.1047053505007.30  | <i>T. cruzi</i> | 46  | 1    | 46   |
| Tc00.1047053505007.30  | <i>T. cruzi</i> | 271 | 149  | 419  |
| Tc00.1047053505009.10  | <i>T. cruzi</i> | 134 | 82   | 215  |
| Tc00.1047053505009.10  | <i>T. cruzi</i> | 343 | 236  | 578  |
| Tc00.1047053505009.4   | <i>T. cruzi</i> | 128 | 18   | 145  |
| Tc00.1047053505025.100 | <i>T. cruzi</i> | 174 | 25   | 198  |
| Tc00.1047053505025.130 | <i>T. cruzi</i> | 83  | 111  | 193  |
| Tc00.1047053505025.137 | <i>T. cruzi</i> | 174 | 17   | 190  |
| Tc00.1047053505025.147 | <i>T. cruzi</i> | 99  | 1    | 99   |
| Tc00.1047053505025.147 | <i>T. cruzi</i> | 58  | 113  | 170  |
| Tc00.1047053505025.30  | <i>T. cruzi</i> | 182 | 29   | 210  |
| Tc00.1047053505025.40  | <i>T. cruzi</i> | 442 | 31   | 472  |
| Tc00.1047053505025.50  | <i>T. cruzi</i> | 66  | 85   | 150  |
| Tc00.1047053505025.60  | <i>T. cruzi</i> | 203 | 109  | 311  |
| Tc00.1047053505025.70  | <i>T. cruzi</i> | 328 | 29   | 356  |
| Tc00.1047053505025.90  | <i>T. cruzi</i> | 477 | 27   | 503  |
| Tc00.1047053505073.10  | <i>T. cruzi</i> | 621 | 297  | 917  |
| Tc00.1047053505073.10  | <i>T. cruzi</i> | 110 | 924  | 1033 |
| Tc00.1047053505073.14  | <i>T. cruzi</i> | 41  | 108  | 148  |
| Tc00.1047053505073.14  | <i>T. cruzi</i> | 80  | 235  | 314  |
| Tc00.1047053505073.14  | <i>T. cruzi</i> | 80  | 235  | 314  |

|                        |                 |     |     |      |
|------------------------|-----------------|-----|-----|------|
| Tc00.1047053505073.20  | <i>T. cruzi</i> | 216 | 54  | 269  |
| Tc00.1047053505073.20  | <i>T. cruzi</i> | 43  | 321 | 363  |
| Tc00.1047053505073.20  | <i>T. cruzi</i> | 69  | 386 | 454  |
| Tc00.1047053505073.20  | <i>T. cruzi</i> | 77  | 477 | 553  |
| Tc00.1047053505073.20  | <i>T. cruzi</i> | 104 | 588 | 691  |
| Tc00.1047053505073.20  | <i>T. cruzi</i> | 177 | 756 | 932  |
| Tc00.1047053505073.30  | <i>T. cruzi</i> | 40  | 148 | 187  |
| Tc00.1047053505123.10  | <i>T. cruzi</i> | 48  | 67  | 114  |
| Tc00.1047053505123.10  | <i>T. cruzi</i> | 68  | 240 | 307  |
| Tc00.1047053505123.10  | <i>T. cruzi</i> | 68  | 240 | 307  |
| Tc00.1047053505123.20  | <i>T. cruzi</i> | 66  | 211 | 276  |
| Tc00.1047053505123.4   | <i>T. cruzi</i> | 213 | 3   | 215  |
| Tc00.1047053505155.4   | <i>T. cruzi</i> | 46  | 1   | 46   |
| Tc00.1047053505229.10  | <i>T. cruzi</i> | 86  | 65  | 150  |
| Tc00.1047053505229.10  | <i>T. cruzi</i> | 60  | 173 | 232  |
| Tc00.1047053505229.10  | <i>T. cruzi</i> | 60  | 541 | 600  |
| Tc00.1047053505229.20  | <i>T. cruzi</i> | 163 | 1   | 163  |
| Tc00.1047053505229.20  | <i>T. cruzi</i> | 208 | 185 | 392  |
| Tc00.1047053505229.20  | <i>T. cruzi</i> | 68  | 464 | 531  |
| Tc00.1047053505229.5   | <i>T. cruzi</i> | 50  | 1   | 50   |
| Tc00.1047053505229.5   | <i>T. cruzi</i> | 112 | 52  | 163  |
| Tc00.1047053505363.10  | <i>T. cruzi</i> | 46  | 1   | 46   |
| Tc00.1047053505363.19  | <i>T. cruzi</i> | 40  | 1   | 40   |
| Tc00.1047053505365.60  | <i>T. cruzi</i> | 41  | 1   | 41   |
| Tc00.1047053505365.60  | <i>T. cruzi</i> | 291 | 710 | 1000 |
| Tc00.1047053505555.30  | <i>T. cruzi</i> | 85  | 414 | 498  |
| Tc00.1047053505555.40  | <i>T. cruzi</i> | 59  | 478 | 536  |
| Tc00.1047053505555.50  | <i>T. cruzi</i> | 81  | 24  | 104  |
| Tc00.1047053505555.50  | <i>T. cruzi</i> | 239 | 156 | 394  |
| Tc00.1047053505555.50  | <i>T. cruzi</i> | 249 | 489 | 737  |
| Tc00.1047053505607.9   | <i>T. cruzi</i> | 41  | 347 | 387  |
| Tc00.1047053505607.9   | <i>T. cruzi</i> | 43  | 405 | 447  |
| Tc00.1047053505607.9   | <i>T. cruzi</i> | 43  | 405 | 447  |
| Tc00.1047053505683.10  | <i>T. cruzi</i> | 51  | 1   | 51   |
| Tc00.1047053505683.10  | <i>T. cruzi</i> | 44  | 316 | 359  |
| Tc00.1047053505683.10  | <i>T. cruzi</i> | 44  | 316 | 359  |
| Tc00.1047053505807.10  | <i>T. cruzi</i> | 64  | 1   | 64   |
| Tc00.1047053505807.110 | <i>T. cruzi</i> | 42  | 572 | 613  |
| Tc00.1047053505807.120 | <i>T. cruzi</i> | 72  | 20  | 91   |
| Tc00.1047053505807.130 | <i>T. cruzi</i> | 42  | 213 | 254  |
| Tc00.1047053505807.140 | <i>T. cruzi</i> | 120 | 1   | 120  |
| Tc00.1047053505807.200 | <i>T. cruzi</i> | 58  | 455 | 512  |
| Tc00.1047053505807.220 | <i>T. cruzi</i> | 53  | 1   | 53   |
| Tc00.1047053505807.230 | <i>T. cruzi</i> | 73  | 27  | 99   |
| Tc00.1047053505807.240 | <i>T. cruzi</i> | 80  | 212 | 291  |
| Tc00.1047053505807.254 | <i>T. cruzi</i> | 55  | 103 | 157  |
| Tc00.1047053505807.254 | <i>T. cruzi</i> | 67  | 200 | 266  |

|                        |                 |     |     |     |
|------------------------|-----------------|-----|-----|-----|
| Tc00.1047053505807.260 | <i>T. cruzi</i> | 109 | 334 | 442 |
| Tc00.1047053505807.40  | <i>T. cruzi</i> | 185 | 84  | 268 |
| Tc00.1047053505807.40  | <i>T. cruzi</i> | 224 | 554 | 777 |
| Tc00.1047053505807.50  | <i>T. cruzi</i> | 49  | 139 | 187 |
| Tc00.1047053505807.54  | <i>T. cruzi</i> | 41  | 42  | 82  |
| Tc00.1047053505807.60  | <i>T. cruzi</i> | 210 | 1   | 210 |
| Tc00.1047053505843.20  | <i>T. cruzi</i> | 67  | 91  | 157 |
| Tc00.1047053505843.30  | <i>T. cruzi</i> | 67  | 214 | 280 |
| Tc00.1047053505843.30  | <i>T. cruzi</i> | 284 | 383 | 666 |
| Tc00.1047053505843.40  | <i>T. cruzi</i> | 51  | 276 | 326 |
| Tc00.1047053505931.40  | <i>T. cruzi</i> | 107 | 1   | 107 |
| Tc00.1047053505931.50  | <i>T. cruzi</i> | 51  | 1   | 51  |
| Tc00.1047053505941.40  | <i>T. cruzi</i> | 50  | 120 | 169 |
| Tc00.1047053505941.49  | <i>T. cruzi</i> | 196 | 24  | 219 |
| Tc00.1047053505941.49  | <i>T. cruzi</i> | 68  | 253 | 320 |
| Tc00.1047053505943.30  | <i>T. cruzi</i> | 64  | 358 | 421 |
| Tc00.1047053505943.40  | <i>T. cruzi</i> | 62  | 51  | 112 |
| Tc00.1047053505943.40  | <i>T. cruzi</i> | 127 | 114 | 240 |
| Tc00.1047053505943.40  | <i>T. cruzi</i> | 132 | 269 | 400 |
| Tc00.1047053505943.40  | <i>T. cruzi</i> | 75  | 407 | 481 |
| Tc00.1047053505943.40  | <i>T. cruzi</i> | 102 | 536 | 637 |
| Tc00.1047053505943.40  | <i>T. cruzi</i> | 135 | 783 | 917 |
| Tc00.1047053505943.50  | <i>T. cruzi</i> | 61  | 45  | 105 |
| Tc00.1047053505943.50  | <i>T. cruzi</i> | 98  | 543 | 640 |
| Tc00.1047053505945.10  | <i>T. cruzi</i> | 289 | 12  | 300 |
| Tc00.1047053505945.10  | <i>T. cruzi</i> | 41  | 440 | 480 |
| Tc00.1047053505945.10  | <i>T. cruzi</i> | 69  | 596 | 664 |
| Tc00.1047053505945.60  | <i>T. cruzi</i> | 118 | 1   | 118 |
| Tc00.1047053505945.60  | <i>T. cruzi</i> | 71  | 185 | 255 |
| Tc00.1047053505945.60  | <i>T. cruzi</i> | 100 | 303 | 402 |
| Tc00.1047053505945.69  | <i>T. cruzi</i> | 49  | 38  | 86  |
| Tc00.1047053505945.80  | <i>T. cruzi</i> | 51  | 81  | 131 |
| Tc00.1047053505965.20  | <i>T. cruzi</i> | 85  | 386 | 470 |
| Tc00.1047053505965.80  | <i>T. cruzi</i> | 80  | 142 | 221 |
| Tc00.1047053505977.13  | <i>T. cruzi</i> | 150 | 57  | 206 |
| Tc00.1047053505977.26  | <i>T. cruzi</i> | 58  | 55  | 112 |
| Tc00.1047053505983.20  | <i>T. cruzi</i> | 61  | 103 | 163 |
| Tc00.1047053505983.20  | <i>T. cruzi</i> | 119 | 243 | 361 |
| Tc00.1047053505983.20  | <i>T. cruzi</i> | 88  | 368 | 455 |
| Tc00.1047053505983.30  | <i>T. cruzi</i> | 46  | 47  | 92  |
| Tc00.1047053505983.30  | <i>T. cruzi</i> | 48  | 310 | 357 |
| Tc00.1047053505983.30  | <i>T. cruzi</i> | 48  | 310 | 357 |
| Tc00.1047053505987.20  | <i>T. cruzi</i> | 60  | 372 | 431 |
| Tc00.1047053505987.20  | <i>T. cruzi</i> | 220 | 451 | 670 |
| Tc00.1047053505987.20  | <i>T. cruzi</i> | 184 | 698 | 881 |
| Tc00.1047053505987.60  | <i>T. cruzi</i> | 129 | 94  | 222 |
| Tc00.1047053505987.60  | <i>T. cruzi</i> | 215 | 229 | 443 |

|                        |                 |     |     |     |
|------------------------|-----------------|-----|-----|-----|
| Tc00.1047053505987.60  | <i>T. cruzi</i> | 215 | 229 | 443 |
| Tc00.1047053505989.100 | <i>T. cruzi</i> | 45  | 159 | 203 |
| Tc00.1047053506021.20  | <i>T. cruzi</i> | 41  | 1   | 41  |
| Tc00.1047053506021.20  | <i>T. cruzi</i> | 50  | 710 | 759 |
| Tc00.1047053506021.20  | <i>T. cruzi</i> | 50  | 710 | 759 |
| Tc00.1047053506025.30  | <i>T. cruzi</i> | 50  | 230 | 279 |
| Tc00.1047053506025.4   | <i>T. cruzi</i> | 44  | 278 | 321 |
| Tc00.1047053506025.40  | <i>T. cruzi</i> | 63  | 171 | 233 |
| Tc00.1047053506025.40  | <i>T. cruzi</i> | 52  | 405 | 456 |
| Tc00.1047053506025.40  | <i>T. cruzi</i> | 52  | 405 | 456 |
| Tc00.1047053506025.60  | <i>T. cruzi</i> | 100 | 93  | 192 |
| Tc00.1047053506047.20  | <i>T. cruzi</i> | 52  | 21  | 72  |
| Tc00.1047053506047.20  | <i>T. cruzi</i> | 40  | 422 | 461 |
| Tc00.1047053506047.20  | <i>T. cruzi</i> | 40  | 422 | 461 |
| Tc00.1047053506107.10  | <i>T. cruzi</i> | 214 | 323 | 536 |
| Tc00.1047053506107.10  | <i>T. cruzi</i> | 67  | 546 | 612 |
| Tc00.1047053506107.10  | <i>T. cruzi</i> | 66  | 833 | 898 |
| Tc00.1047053506113.60  | <i>T. cruzi</i> | 75  | 1   | 75  |
| Tc00.1047053506113.60  | <i>T. cruzi</i> | 51  | 166 | 216 |
| Tc00.1047053506125.20  | <i>T. cruzi</i> | 56  | 113 | 168 |
| Tc00.1047053506125.20  | <i>T. cruzi</i> | 57  | 213 | 269 |
| Tc00.1047053506127.100 | <i>T. cruzi</i> | 110 | 42  | 151 |
| Tc00.1047053506127.100 | <i>T. cruzi</i> | 77  | 171 | 247 |
| Tc00.1047053506127.100 | <i>T. cruzi</i> | 74  | 281 | 354 |
| Tc00.1047053506127.100 | <i>T. cruzi</i> | 150 | 381 | 530 |
| Tc00.1047053506127.100 | <i>T. cruzi</i> | 192 | 593 | 784 |
| Tc00.1047053506127.100 | <i>T. cruzi</i> | 49  | 883 | 931 |
| Tc00.1047053506127.120 | <i>T. cruzi</i> | 73  | 1   | 73  |
| Tc00.1047053506127.130 | <i>T. cruzi</i> | 227 | 293 | 519 |
| Tc00.1047053506127.130 | <i>T. cruzi</i> | 51  | 597 | 647 |
| Tc00.1047053506127.140 | <i>T. cruzi</i> | 42  | 1   | 42  |
| Tc00.1047053506127.140 | <i>T. cruzi</i> | 63  | 56  | 118 |
| Tc00.1047053506127.140 | <i>T. cruzi</i> | 59  | 159 | 217 |
| Tc00.1047053506127.140 | <i>T. cruzi</i> | 57  | 337 | 393 |
| Tc00.1047053506127.140 | <i>T. cruzi</i> | 171 | 421 | 591 |
| Tc00.1047053506127.150 | <i>T. cruzi</i> | 41  | 432 | 472 |
| Tc00.1047053506127.150 | <i>T. cruzi</i> | 97  | 577 | 673 |
| Tc00.1047053506127.150 | <i>T. cruzi</i> | 136 | 722 | 857 |
| Tc00.1047053506127.160 | <i>T. cruzi</i> | 90  | 721 | 810 |
| Tc00.1047053506127.170 | <i>T. cruzi</i> | 44  | 1   | 44  |
| Tc00.1047053506127.170 | <i>T. cruzi</i> | 61  | 128 | 188 |
| Tc00.1047053506127.40  | <i>T. cruzi</i> | 75  | 1   | 75  |
| Tc00.1047053506127.40  | <i>T. cruzi</i> | 160 | 82  | 241 |
| Tc00.1047053506127.50  | <i>T. cruzi</i> | 72  | 1   | 72  |
| Tc00.1047053506127.70  | <i>T. cruzi</i> | 194 | 1   | 194 |
| Tc00.1047053506127.70  | <i>T. cruzi</i> | 45  | 199 | 243 |
| Tc00.1047053506127.70  | <i>T. cruzi</i> | 42  | 283 | 324 |

|                        |                 |     |      |      |
|------------------------|-----------------|-----|------|------|
| Tc00.1047053506127.80  | <i>T. cruzi</i> | 49  | 1    | 49   |
| Tc00.1047053506129.10  | <i>T. cruzi</i> | 59  | 182  | 240  |
| Tc00.1047053506129.10  | <i>T. cruzi</i> | 83  | 643  | 725  |
| Tc00.1047053506129.10  | <i>T. cruzi</i> | 83  | 643  | 725  |
| Tc00.1047053506129.30  | <i>T. cruzi</i> | 47  | 1    | 47   |
| Tc00.1047053506129.50  | <i>T. cruzi</i> | 40  | 1    | 40   |
| Tc00.1047053506129.50  | <i>T. cruzi</i> | 815 | 682  | 1496 |
| Tc00.1047053506135.100 | <i>T. cruzi</i> | 51  | 350  | 400  |
| Tc00.1047053506135.20  | <i>T. cruzi</i> | 42  | 1    | 42   |
| Tc00.1047053506135.20  | <i>T. cruzi</i> | 149 | 252  | 400  |
| Tc00.1047053506135.20  | <i>T. cruzi</i> | 76  | 539  | 614  |
| Tc00.1047053506135.20  | <i>T. cruzi</i> | 259 | 1022 | 1280 |
| Tc00.1047053506135.20  | <i>T. cruzi</i> | 68  | 1497 | 1564 |
| Tc00.1047053506135.30  | <i>T. cruzi</i> | 43  | 73   | 115  |
| Tc00.1047053506135.30  | <i>T. cruzi</i> | 72  | 117  | 188  |
| Tc00.1047053506135.30  | <i>T. cruzi</i> | 74  | 268  | 341  |
| Tc00.1047053506135.30  | <i>T. cruzi</i> | 192 | 506  | 697  |
| Tc00.1047053506135.40  | <i>T. cruzi</i> | 69  | 37   | 105  |
| Tc00.1047053506135.40  | <i>T. cruzi</i> | 41  | 219  | 259  |
| Tc00.1047053506135.40  | <i>T. cruzi</i> | 44  | 382  | 425  |
| Tc00.1047053506135.50  | <i>T. cruzi</i> | 199 | 151  | 349  |
| Tc00.1047053506135.50  | <i>T. cruzi</i> | 104 | 359  | 462  |
| Tc00.1047053506135.50  | <i>T. cruzi</i> | 83  | 515  | 597  |
| Tc00.1047053506135.50  | <i>T. cruzi</i> | 40  | 603  | 642  |
| Tc00.1047053506135.50  | <i>T. cruzi</i> | 41  | 794  | 834  |
| Tc00.1047053506135.50  | <i>T. cruzi</i> | 46  | 896  | 941  |
| Tc00.1047053506135.70  | <i>T. cruzi</i> | 47  | 1    | 47   |
| Tc00.1047053506135.70  | <i>T. cruzi</i> | 73  | 160  | 232  |
| Tc00.1047053506135.70  | <i>T. cruzi</i> | 53  | 440  | 492  |
| Tc00.1047053506135.80  | <i>T. cruzi</i> | 59  | 17   | 75   |
| Tc00.1047053506135.80  | <i>T. cruzi</i> | 161 | 212  | 372  |
| Tc00.1047053506135.80  | <i>T. cruzi</i> | 161 | 212  | 372  |
| Tc00.1047053506135.90  | <i>T. cruzi</i> | 53  | 409  | 461  |
| Tc00.1047053506147.100 | <i>T. cruzi</i> | 41  | 19   | 59   |
| Tc00.1047053506147.100 | <i>T. cruzi</i> | 171 | 222  | 392  |
| Tc00.1047053506147.100 | <i>T. cruzi</i> | 150 | 395  | 544  |
| Tc00.1047053506147.100 | <i>T. cruzi</i> | 147 | 595  | 741  |
| Tc00.1047053506147.110 | <i>T. cruzi</i> | 78  | 1    | 78   |
| Tc00.1047053506147.110 | <i>T. cruzi</i> | 75  | 155  | 229  |
| Tc00.1047053506147.110 | <i>T. cruzi</i> | 40  | 423  | 462  |
| Tc00.1047053506147.110 | <i>T. cruzi</i> | 68  | 510  | 577  |
| Tc00.1047053506147.110 | <i>T. cruzi</i> | 174 | 659  | 832  |
| Tc00.1047053506147.110 | <i>T. cruzi</i> | 58  | 1011 | 1068 |
| Tc00.1047053506147.120 | <i>T. cruzi</i> | 60  | 18   | 77   |
| Tc00.1047053506147.120 | <i>T. cruzi</i> | 45  | 189  | 233  |
| Tc00.1047053506147.120 | <i>T. cruzi</i> | 45  | 189  | 233  |
| Tc00.1047053506147.140 | <i>T. cruzi</i> | 51  | 27   | 77   |

|                        |                 |     |      |      |
|------------------------|-----------------|-----|------|------|
| Tc00.1047053506147.150 | <i>T. cruzi</i> | 69  | 1    | 69   |
| Tc00.1047053506147.150 | <i>T. cruzi</i> | 89  | 201  | 289  |
| Tc00.1047053506147.150 | <i>T. cruzi</i> | 177 | 388  | 564  |
| Tc00.1047053506147.170 | <i>T. cruzi</i> | 42  | 121  | 162  |
| Tc00.1047053506147.170 | <i>T. cruzi</i> | 40  | 224  | 263  |
| Tc00.1047053506147.170 | <i>T. cruzi</i> | 40  | 224  | 263  |
| Tc00.1047053506147.180 | <i>T. cruzi</i> | 92  | 675  | 766  |
| Tc00.1047053506147.180 | <i>T. cruzi</i> | 53  | 1265 | 1317 |
| Tc00.1047053506147.180 | <i>T. cruzi</i> | 53  | 1265 | 1317 |
| Tc00.1047053506147.184 | <i>T. cruzi</i> | 61  | 54   | 114  |
| Tc00.1047053506147.190 | <i>T. cruzi</i> | 481 | 46   | 526  |
| Tc00.1047053506147.20  | <i>T. cruzi</i> | 66  | 1    | 66   |
| Tc00.1047053506147.20  | <i>T. cruzi</i> | 45  | 119  | 163  |
| Tc00.1047053506147.20  | <i>T. cruzi</i> | 96  | 240  | 335  |
| Tc00.1047053506147.220 | <i>T. cruzi</i> | 66  | 1    | 66   |
| Tc00.1047053506147.220 | <i>T. cruzi</i> | 73  | 84   | 156  |
| Tc00.1047053506147.220 | <i>T. cruzi</i> | 45  | 160  | 204  |
| Tc00.1047053506147.50  | <i>T. cruzi</i> | 64  | 130  | 193  |
| Tc00.1047053506147.70  | <i>T. cruzi</i> | 212 | 47   | 258  |
| Tc00.1047053506147.80  | <i>T. cruzi</i> | 63  | 106  | 168  |
| Tc00.1047053506163.10  | <i>T. cruzi</i> | 40  | 528  | 567  |
| Tc00.1047053506163.30  | <i>T. cruzi</i> | 129 | 70   | 198  |
| Tc00.1047053506163.50  | <i>T. cruzi</i> | 41  | 171  | 211  |
| Tc00.1047053506163.60  | <i>T. cruzi</i> | 81  | 195  | 275  |
| Tc00.1047053506163.60  | <i>T. cruzi</i> | 158 | 311  | 468  |
| Tc00.1047053506163.60  | <i>T. cruzi</i> | 158 | 311  | 468  |
| Tc00.1047053506163.70  | <i>T. cruzi</i> | 100 | 1    | 100  |
| Tc00.1047053506163.70  | <i>T. cruzi</i> | 73  | 270  | 342  |
| Tc00.1047053506163.70  | <i>T. cruzi</i> | 68  | 383  | 450  |
| Tc00.1047053506163.70  | <i>T. cruzi</i> | 47  | 475  | 521  |
| Tc00.1047053506163.70  | <i>T. cruzi</i> | 58  | 681  | 738  |
| Tc00.1047053506163.70  | <i>T. cruzi</i> | 89  | 800  | 888  |
| Tc00.1047053506163.80  | <i>T. cruzi</i> | 197 | 68   | 264  |
| Tc00.1047053506163.80  | <i>T. cruzi</i> | 59  | 485  | 543  |
| Tc00.1047053506165.4   | <i>T. cruzi</i> | 47  | 157  | 203  |
| Tc00.1047053506167.20  | <i>T. cruzi</i> | 55  | 1    | 55   |
| Tc00.1047053506167.20  | <i>T. cruzi</i> | 46  | 780  | 825  |
| Tc00.1047053506167.20  | <i>T. cruzi</i> | 153 | 980  | 1132 |
| Tc00.1047053506167.30  | <i>T. cruzi</i> | 166 | 1    | 166  |
| Tc00.1047053506167.50  | <i>T. cruzi</i> | 80  | 1625 | 1704 |
| Tc00.1047053506167.9   | <i>T. cruzi</i> | 63  | 397  | 459  |
| Tc00.1047053506167.9   | <i>T. cruzi</i> | 179 | 482  | 660  |
| Tc00.1047053506167.9   | <i>T. cruzi</i> | 155 | 683  | 837  |
| Tc00.1047053506179.20  | <i>T. cruzi</i> | 53  | 463  | 515  |
| Tc00.1047053506179.40  | <i>T. cruzi</i> | 74  | 13   | 86   |
| Tc00.1047053506179.40  | <i>T. cruzi</i> | 91  | 117  | 207  |
| Tc00.1047053506179.40  | <i>T. cruzi</i> | 463 | 226  | 688  |

|                        |                 |     |      |      |
|------------------------|-----------------|-----|------|------|
| Tc00.1047053506179.59  | <i>T. cruzi</i> | 97  | 32   | 128  |
| Tc00.1047053506181.10  | <i>T. cruzi</i> | 132 | 1    | 132  |
| Tc00.1047053506181.10  | <i>T. cruzi</i> | 197 | 146  | 342  |
| Tc00.1047053506181.10  | <i>T. cruzi</i> | 141 | 373  | 513  |
| Tc00.1047053506181.110 | <i>T. cruzi</i> | 232 | 1    | 232  |
| Tc00.1047053506181.120 | <i>T. cruzi</i> | 113 | 63   | 175  |
| Tc00.1047053506181.140 | <i>T. cruzi</i> | 42  | 1    | 42   |
| Tc00.1047053506181.140 | <i>T. cruzi</i> | 98  | 282  | 379  |
| Tc00.1047053506181.140 | <i>T. cruzi</i> | 74  | 452  | 525  |
| Tc00.1047053506181.140 | <i>T. cruzi</i> | 184 | 527  | 710  |
| Tc00.1047053506181.150 | <i>T. cruzi</i> | 40  | 690  | 729  |
| Tc00.1047053506181.20  | <i>T. cruzi</i> | 74  | 28   | 101  |
| Tc00.1047053506181.20  | <i>T. cruzi</i> | 139 | 107  | 245  |
| Tc00.1047053506181.20  | <i>T. cruzi</i> | 77  | 265  | 341  |
| Tc00.1047053506181.20  | <i>T. cruzi</i> | 200 | 451  | 650  |
| Tc00.1047053506181.20  | <i>T. cruzi</i> | 50  | 675  | 724  |
| Tc00.1047053506181.20  | <i>T. cruzi</i> | 68  | 751  | 818  |
| Tc00.1047053506181.20  | <i>T. cruzi</i> | 172 | 854  | 1025 |
| Tc00.1047053506181.40  | <i>T. cruzi</i> | 71  | 75   | 145  |
| Tc00.1047053506181.40  | <i>T. cruzi</i> | 88  | 182  | 269  |
| Tc00.1047053506181.40  | <i>T. cruzi</i> | 72  | 446  | 517  |
| Tc00.1047053506181.50  | <i>T. cruzi</i> | 47  | 252  | 298  |
| Tc00.1047053506181.70  | <i>T. cruzi</i> | 132 | 5    | 136  |
| Tc00.1047053506181.70  | <i>T. cruzi</i> | 182 | 492  | 673  |
| Tc00.1047053506181.70  | <i>T. cruzi</i> | 113 | 735  | 847  |
| Tc00.1047053506181.70  | <i>T. cruzi</i> | 47  | 875  | 921  |
| Tc00.1047053506181.70  | <i>T. cruzi</i> | 47  | 953  | 999  |
| Tc00.1047053506181.70  | <i>T. cruzi</i> | 76  | 1084 | 1159 |
| Tc00.1047053506181.70  | <i>T. cruzi</i> | 45  | 1277 | 1321 |
| Tc00.1047053506181.90  | <i>T. cruzi</i> | 59  | 201  | 259  |
| Tc00.1047053506183.20  | <i>T. cruzi</i> | 44  | 229  | 272  |
| Tc00.1047053506183.20  | <i>T. cruzi</i> | 57  | 1595 | 1651 |
| Tc00.1047053506183.20  | <i>T. cruzi</i> | 83  | 2837 | 2919 |
| Tc00.1047053506183.20  | <i>T. cruzi</i> | 73  | 3388 | 3460 |
| Tc00.1047053506183.70  | <i>T. cruzi</i> | 52  | 193  | 244  |
| Tc00.1047053506203.100 | <i>T. cruzi</i> | 89  | 1    | 89   |
| Tc00.1047053506203.100 | <i>T. cruzi</i> | 93  | 240  | 332  |
| Tc00.1047053506203.100 | <i>T. cruzi</i> | 84  | 429  | 512  |
| Tc00.1047053506203.129 | <i>T. cruzi</i> | 126 | 1    | 126  |
| Tc00.1047053506203.129 | <i>T. cruzi</i> | 49  | 769  | 817  |
| Tc00.1047053506203.20  | <i>T. cruzi</i> | 57  | 30   | 86   |
| Tc00.1047053506203.25  | <i>T. cruzi</i> | 44  | 86   | 129  |
| Tc00.1047053506203.25  | <i>T. cruzi</i> | 49  | 254  | 302  |
| Tc00.1047053506203.25  | <i>T. cruzi</i> | 49  | 254  | 302  |
| Tc00.1047053506203.30  | <i>T. cruzi</i> | 71  | 57   | 127  |
| Tc00.1047053506203.30  | <i>T. cruzi</i> | 57  | 547  | 603  |
| Tc00.1047053506203.30  | <i>T. cruzi</i> | 54  | 883  | 936  |



|                        |                 |     |      |      |
|------------------------|-----------------|-----|------|------|
| Tc00.1047053506203.30  | <i>T. cruzi</i> | 85  | 939  | 1023 |
| Tc00.1047053506203.40  | <i>T. cruzi</i> | 94  | 423  | 516  |
| Tc00.1047053506203.40  | <i>T. cruzi</i> | 61  | 745  | 805  |
| Tc00.1047053506203.40  | <i>T. cruzi</i> | 46  | 927  | 972  |
| Tc00.1047053506203.40  | <i>T. cruzi</i> | 118 | 1016 | 1133 |
| Tc00.1047053506203.40  | <i>T. cruzi</i> | 56  | 1382 | 1437 |
| Tc00.1047053506203.50  | <i>T. cruzi</i> | 54  | 366  | 419  |
| Tc00.1047053506203.50  | <i>T. cruzi</i> | 50  | 432  | 481  |
| Tc00.1047053506203.50  | <i>T. cruzi</i> | 50  | 432  | 481  |
| Tc00.1047053506203.60  | <i>T. cruzi</i> | 53  | 263  | 315  |
| Tc00.1047053506203.70  | <i>T. cruzi</i> | 164 | 11   | 174  |
| Tc00.1047053506203.70  | <i>T. cruzi</i> | 158 | 185  | 342  |
| Tc00.1047053506203.70  | <i>T. cruzi</i> | 63  | 988  | 1050 |
| Tc00.1047053506203.80  | <i>T. cruzi</i> | 79  | 335  | 413  |
| Tc00.1047053506203.80  | <i>T. cruzi</i> | 89  | 421  | 509  |
| Tc00.1047053506203.90  | <i>T. cruzi</i> | 234 | 1    | 234  |
| Tc00.1047053506203.90  | <i>T. cruzi</i> | 89  | 270  | 358  |
| Tc00.1047053506203.90  | <i>T. cruzi</i> | 184 | 397  | 580  |
| Tc00.1047053506203.90  | <i>T. cruzi</i> | 140 | 583  | 722  |
| Tc00.1047053506203.90  | <i>T. cruzi</i> | 69  | 738  | 806  |
| Tc00.1047053506203.90  | <i>T. cruzi</i> | 40  | 877  | 916  |
| Tc00.1047053506205.10  | <i>T. cruzi</i> | 73  | 447  | 519  |
| Tc00.1047053506205.20  | <i>T. cruzi</i> | 99  | 1    | 99   |
| Tc00.1047053506205.30  | <i>T. cruzi</i> | 51  | 341  | 391  |
| Tc00.1047053506205.40  | <i>T. cruzi</i> | 164 | 1    | 164  |
| Tc00.1047053506207.20  | <i>T. cruzi</i> | 59  | 135  | 193  |
| Tc00.1047053506207.20  | <i>T. cruzi</i> | 41  | 246  | 286  |
| Tc00.1047053506207.20  | <i>T. cruzi</i> | 60  | 680  | 739  |
| Tc00.1047053506207.20  | <i>T. cruzi</i> | 224 | 1104 | 1327 |
| Tc00.1047053506207.20  | <i>T. cruzi</i> | 67  | 1339 | 1405 |
| Tc00.1047053506207.30  | <i>T. cruzi</i> | 91  | 273  | 363  |
| Tc00.1047053506207.40  | <i>T. cruzi</i> | 89  | 11   | 99   |
| Tc00.1047053506211.10  | <i>T. cruzi</i> | 65  | 1    | 65   |
| Tc00.1047053506211.10  | <i>T. cruzi</i> | 42  | 83   | 124  |
| Tc00.1047053506211.10  | <i>T. cruzi</i> | 46  | 386  | 431  |
| Tc00.1047053506211.100 | <i>T. cruzi</i> | 164 | 447  | 610  |
| Tc00.1047053506211.107 | <i>T. cruzi</i> | 100 | 63   | 162  |
| Tc00.1047053506211.107 | <i>T. cruzi</i> | 60  | 182  | 241  |
| Tc00.1047053506211.107 | <i>T. cruzi</i> | 57  | 320  | 376  |
| Tc00.1047053506211.114 | <i>T. cruzi</i> | 130 | 229  | 358  |
| Tc00.1047053506211.114 | <i>T. cruzi</i> | 57  | 385  | 441  |
| Tc00.1047053506211.120 | <i>T. cruzi</i> | 92  | 264  | 355  |
| Tc00.1047053506211.120 | <i>T. cruzi</i> | 64  | 658  | 721  |
| Tc00.1047053506211.130 | <i>T. cruzi</i> | 102 | 1    | 102  |
| Tc00.1047053506211.130 | <i>T. cruzi</i> | 66  | 460  | 525  |
| Tc00.1047053506211.140 | <i>T. cruzi</i> | 98  | 20   | 117  |
| Tc00.1047053506211.170 | <i>T. cruzi</i> | 99  | 1    | 99   |

|                        |                 |     |      |      |
|------------------------|-----------------|-----|------|------|
| Tc00.1047053506211.180 | <i>T. cruzi</i> | 73  | 320  | 392  |
| Tc00.1047053506211.190 | <i>T. cruzi</i> | 43  | 130  | 172  |
| Tc00.1047053506211.190 | <i>T. cruzi</i> | 113 | 1363 | 1475 |
| Tc00.1047053506211.20  | <i>T. cruzi</i> | 47  | 104  | 150  |
| Tc00.1047053506211.220 | <i>T. cruzi</i> | 182 | 467  | 648  |
| Tc00.1047053506211.230 | <i>T. cruzi</i> | 41  | 185  | 225  |
| Tc00.1047053506211.230 | <i>T. cruzi</i> | 40  | 251  | 290  |
| Tc00.1047053506211.230 | <i>T. cruzi</i> | 40  | 251  | 290  |
| Tc00.1047053506211.240 | <i>T. cruzi</i> | 171 | 1    | 171  |
| Tc00.1047053506211.250 | <i>T. cruzi</i> | 60  | 1    | 60   |
| Tc00.1047053506211.259 | <i>T. cruzi</i> | 62  | 1    | 62   |
| Tc00.1047053506211.40  | <i>T. cruzi</i> | 62  | 166  | 227  |
| Tc00.1047053506211.40  | <i>T. cruzi</i> | 42  | 398  | 439  |
| Tc00.1047053506211.40  | <i>T. cruzi</i> | 42  | 398  | 439  |
| Tc00.1047053506211.60  | <i>T. cruzi</i> | 143 | 263  | 405  |
| Tc00.1047053506211.60  | <i>T. cruzi</i> | 101 | 446  | 546  |
| Tc00.1047053506211.70  | <i>T. cruzi</i> | 82  | 137  | 218  |
| Tc00.1047053506211.80  | <i>T. cruzi</i> | 77  | 1059 | 1135 |
| Tc00.1047053506213.10  | <i>T. cruzi</i> | 72  | 1    | 72   |
| Tc00.1047053506213.110 | <i>T. cruzi</i> | 118 | 65   | 182  |
| Tc00.1047053506213.110 | <i>T. cruzi</i> | 49  | 288  | 336  |
| Tc00.1047053506213.110 | <i>T. cruzi</i> | 49  | 288  | 336  |
| Tc00.1047053506213.120 | <i>T. cruzi</i> | 115 | 1    | 115  |
| Tc00.1047053506213.120 | <i>T. cruzi</i> | 112 | 520  | 631  |
| Tc00.1047053506213.30  | <i>T. cruzi</i> | 43  | 1    | 43   |
| Tc00.1047053506213.30  | <i>T. cruzi</i> | 67  | 153  | 219  |
| Tc00.1047053506213.30  | <i>T. cruzi</i> | 67  | 153  | 219  |
| Tc00.1047053506213.40  | <i>T. cruzi</i> | 69  | 1    | 69   |
| Tc00.1047053506213.40  | <i>T. cruzi</i> | 124 | 320  | 443  |
| Tc00.1047053506213.40  | <i>T. cruzi</i> | 160 | 527  | 686  |
| Tc00.1047053506213.60  | <i>T. cruzi</i> | 46  | 1    | 46   |
| Tc00.1047053506213.70  | <i>T. cruzi</i> | 40  | 137  | 176  |
| Tc00.1047053506215.19  | <i>T. cruzi</i> | 81  | 708  | 788  |
| Tc00.1047053506215.19  | <i>T. cruzi</i> | 62  | 1046 | 1107 |
| Tc00.1047053506221.100 | <i>T. cruzi</i> | 104 | 1    | 104  |
| Tc00.1047053506221.100 | <i>T. cruzi</i> | 58  | 272  | 329  |
| Tc00.1047053506221.110 | <i>T. cruzi</i> | 154 | 78   | 231  |
| Tc00.1047053506221.120 | <i>T. cruzi</i> | 60  | 38   | 97   |
| Tc00.1047053506221.120 | <i>T. cruzi</i> | 102 | 126  | 227  |
| Tc00.1047053506221.70  | <i>T. cruzi</i> | 268 | 76   | 343  |
| Tc00.1047053506221.80  | <i>T. cruzi</i> | 42  | 253  | 294  |
| Tc00.1047053506221.90  | <i>T. cruzi</i> | 298 | 1    | 298  |
| Tc00.1047053506221.90  | <i>T. cruzi</i> | 230 | 402  | 631  |
| Tc00.1047053506223.100 | <i>T. cruzi</i> | 104 | 1    | 104  |
| Tc00.1047053506223.100 | <i>T. cruzi</i> | 42  | 485  | 526  |
| Tc00.1047053506223.100 | <i>T. cruzi</i> | 42  | 485  | 526  |
| Tc00.1047053506223.110 | <i>T. cruzi</i> | 62  | 121  | 182  |

|                        |                 |     |      |      |
|------------------------|-----------------|-----|------|------|
| Tc00.1047053506223.120 | <i>T. cruzi</i> | 43  | 33   | 75   |
| Tc00.1047053506223.120 | <i>T. cruzi</i> | 71  | 802  | 872  |
| Tc00.1047053506223.120 | <i>T. cruzi</i> | 71  | 802  | 872  |
| Tc00.1047053506223.130 | <i>T. cruzi</i> | 51  | 49   | 99   |
| Tc00.1047053506223.20  | <i>T. cruzi</i> | 43  | 1    | 43   |
| Tc00.1047053506223.20  | <i>T. cruzi</i> | 48  | 98   | 145  |
| Tc00.1047053506223.30  | <i>T. cruzi</i> | 44  | 46   | 89   |
| Tc00.1047053506223.40  | <i>T. cruzi</i> | 47  | 1    | 47   |
| Tc00.1047053506223.40  | <i>T. cruzi</i> | 77  | 76   | 152  |
| Tc00.1047053506223.40  | <i>T. cruzi</i> | 77  | 76   | 152  |
| Tc00.1047053506223.50  | <i>T. cruzi</i> | 40  | 49   | 88   |
| Tc00.1047053506223.70  | <i>T. cruzi</i> | 63  | 158  | 220  |
| Tc00.1047053506223.70  | <i>T. cruzi</i> | 130 | 232  | 361  |
| Tc00.1047053506223.80  | <i>T. cruzi</i> | 91  | 1    | 91   |
| Tc00.1047053506223.80  | <i>T. cruzi</i> | 50  | 375  | 424  |
| Tc00.1047053506223.80  | <i>T. cruzi</i> | 49  | 635  | 683  |
| Tc00.1047053506223.84  | <i>T. cruzi</i> | 230 | 1    | 230  |
| Tc00.1047053506223.90  | <i>T. cruzi</i> | 180 | 1    | 180  |
| Tc00.1047053506227.100 | <i>T. cruzi</i> | 47  | 1    | 47   |
| Tc00.1047053506227.110 | <i>T. cruzi</i> | 67  | 1    | 67   |
| Tc00.1047053506227.110 | <i>T. cruzi</i> | 71  | 137  | 207  |
| Tc00.1047053506227.120 | <i>T. cruzi</i> | 43  | 1    | 43   |
| Tc00.1047053506227.120 | <i>T. cruzi</i> | 44  | 298  | 341  |
| Tc00.1047053506227.120 | <i>T. cruzi</i> | 44  | 298  | 341  |
| Tc00.1047053506227.130 | <i>T. cruzi</i> | 124 | 40   | 163  |
| Tc00.1047053506227.140 | <i>T. cruzi</i> | 62  | 64   | 125  |
| Tc00.1047053506227.140 | <i>T. cruzi</i> | 47  | 145  | 191  |
| Tc00.1047053506227.140 | <i>T. cruzi</i> | 47  | 145  | 191  |
| Tc00.1047053506227.170 | <i>T. cruzi</i> | 45  | 1    | 45   |
| Tc00.1047053506227.190 | <i>T. cruzi</i> | 83  | 111  | 193  |
| Tc00.1047053506227.20  | <i>T. cruzi</i> | 46  | 1    | 46   |
| Tc00.1047053506227.20  | <i>T. cruzi</i> | 67  | 83   | 149  |
| Tc00.1047053506227.20  | <i>T. cruzi</i> | 78  | 213  | 290  |
| Tc00.1047053506227.20  | <i>T. cruzi</i> | 73  | 296  | 368  |
| Tc00.1047053506227.200 | <i>T. cruzi</i> | 68  | 1    | 68   |
| Tc00.1047053506227.200 | <i>T. cruzi</i> | 169 | 89   | 257  |
| Tc00.1047053506227.205 | <i>T. cruzi</i> | 181 | 1    | 181  |
| Tc00.1047053506227.205 | <i>T. cruzi</i> | 72  | 192  | 263  |
| Tc00.1047053506227.210 | <i>T. cruzi</i> | 49  | 65   | 113  |
| Tc00.1047053506227.210 | <i>T. cruzi</i> | 80  | 147  | 226  |
| Tc00.1047053506227.210 | <i>T. cruzi</i> | 80  | 147  | 226  |
| Tc00.1047053506227.230 | <i>T. cruzi</i> | 91  | 168  | 258  |
| Tc00.1047053506227.240 | <i>T. cruzi</i> | 87  | 276  | 362  |
| Tc00.1047053506227.240 | <i>T. cruzi</i> | 45  | 541  | 585  |
| Tc00.1047053506227.240 | <i>T. cruzi</i> | 57  | 920  | 976  |
| Tc00.1047053506227.240 | <i>T. cruzi</i> | 42  | 1143 | 1184 |
| Tc00.1047053506227.30  | <i>T. cruzi</i> | 391 | 13   | 403  |

|                        |                 |     |      |      |
|------------------------|-----------------|-----|------|------|
| Tc00.1047053506227.30  | <i>T. cruzi</i> | 83  | 410  | 492  |
| Tc00.1047053506227.40  | <i>T. cruzi</i> | 229 | 1    | 229  |
| Tc00.1047053506227.50  | <i>T. cruzi</i> | 40  | 389  | 428  |
| Tc00.1047053506227.50  | <i>T. cruzi</i> | 55  | 450  | 504  |
| Tc00.1047053506227.50  | <i>T. cruzi</i> | 55  | 450  | 504  |
| Tc00.1047053506227.80  | <i>T. cruzi</i> | 49  | 1062 | 1110 |
| Tc00.1047053506227.90  | <i>T. cruzi</i> | 46  | 288  | 333  |
| Tc00.1047053506239.10  | <i>T. cruzi</i> | 293 | 36   | 328  |
| Tc00.1047053506239.10  | <i>T. cruzi</i> | 53  | 374  | 426  |
| Tc00.1047053506239.20  | <i>T. cruzi</i> | 120 | 1    | 120  |
| Tc00.1047053506239.20  | <i>T. cruzi</i> | 66  | 453  | 518  |
| Tc00.1047053506239.30  | <i>T. cruzi</i> | 272 | 279  | 550  |
| Tc00.1047053506239.50  | <i>T. cruzi</i> | 66  | 152  | 217  |
| Tc00.1047053506249.40  | <i>T. cruzi</i> | 148 | 187  | 334  |
| Tc00.1047053506249.50  | <i>T. cruzi</i> | 81  | 1    | 81   |
| Tc00.1047053506249.60  | <i>T. cruzi</i> | 170 | 1    | 170  |
| Tc00.1047053506249.70  | <i>T. cruzi</i> | 41  | 1    | 41   |
| Tc00.1047053506251.10  | <i>T. cruzi</i> | 46  | 17   | 62   |
| Tc00.1047053506251.10  | <i>T. cruzi</i> | 55  | 357  | 411  |
| Tc00.1047053506251.10  | <i>T. cruzi</i> | 41  | 613  | 653  |
| Tc00.1047053506251.30  | <i>T. cruzi</i> | 89  | 100  | 188  |
| Tc00.1047053506251.40  | <i>T. cruzi</i> | 47  | 133  | 179  |
| Tc00.1047053506251.40  | <i>T. cruzi</i> | 44  | 407  | 450  |
| Tc00.1047053506251.40  | <i>T. cruzi</i> | 149 | 792  | 940  |
| Tc00.1047053506265.10  | <i>T. cruzi</i> | 48  | 45   | 92   |
| Tc00.1047053506265.100 | <i>T. cruzi</i> | 51  | 1    | 51   |
| Tc00.1047053506265.100 | <i>T. cruzi</i> | 63  | 187  | 249  |
| Tc00.1047053506265.100 | <i>T. cruzi</i> | 55  | 471  | 525  |
| Tc00.1047053506265.110 | <i>T. cruzi</i> | 53  | 107  | 159  |
| Tc00.1047053506265.114 | <i>T. cruzi</i> | 70  | 150  | 219  |
| Tc00.1047053506265.120 | <i>T. cruzi</i> | 40  | 41   | 80   |
| Tc00.1047053506265.120 | <i>T. cruzi</i> | 335 | 97   | 431  |
| Tc00.1047053506265.120 | <i>T. cruzi</i> | 335 | 97   | 431  |
| Tc00.1047053506265.130 | <i>T. cruzi</i> | 152 | 1    | 152  |
| Tc00.1047053506265.140 | <i>T. cruzi</i> | 41  | 1    | 41   |
| Tc00.1047053506265.140 | <i>T. cruzi</i> | 80  | 359  | 438  |
| Tc00.1047053506265.160 | <i>T. cruzi</i> | 42  | 40   | 81   |
| Tc00.1047053506265.160 | <i>T. cruzi</i> | 52  | 154  | 205  |
| Tc00.1047053506265.160 | <i>T. cruzi</i> | 52  | 154  | 205  |
| Tc00.1047053506265.190 | <i>T. cruzi</i> | 217 | 1    | 217  |
| Tc00.1047053506265.190 | <i>T. cruzi</i> | 215 | 251  | 465  |
| Tc00.1047053506265.190 | <i>T. cruzi</i> | 283 | 622  | 904  |
| Tc00.1047053506265.20  | <i>T. cruzi</i> | 121 | 569  | 689  |
| Tc00.1047053506265.20  | <i>T. cruzi</i> | 67  | 1019 | 1085 |
| Tc00.1047053506265.20  | <i>T. cruzi</i> | 45  | 1234 | 1278 |
| Tc00.1047053506265.20  | <i>T. cruzi</i> | 104 | 1642 | 1745 |
| Tc00.1047053506265.20  | <i>T. cruzi</i> | 97  | 1957 | 2053 |

|                        |                 |     |      |      |
|------------------------|-----------------|-----|------|------|
| Tc00.1047053506265.200 | <i>T. cruzi</i> | 152 | 113  | 264  |
| Tc00.1047053506265.30  | <i>T. cruzi</i> | 219 | 48   | 266  |
| Tc00.1047053506265.40  | <i>T. cruzi</i> | 67  | 47   | 113  |
| Tc00.1047053506265.45  | <i>T. cruzi</i> | 143 | 60   | 202  |
| Tc00.1047053506265.50  | <i>T. cruzi</i> | 48  | 153  | 200  |
| Tc00.1047053506265.60  | <i>T. cruzi</i> | 48  | 114  | 161  |
| Tc00.1047053506265.60  | <i>T. cruzi</i> | 61  | 437  | 497  |
| Tc00.1047053506265.60  | <i>T. cruzi</i> | 57  | 757  | 813  |
| Tc00.1047053506265.60  | <i>T. cruzi</i> | 53  | 1060 | 1112 |
| Tc00.1047053506265.60  | <i>T. cruzi</i> | 116 | 1173 | 1288 |
| Tc00.1047053506265.70  | <i>T. cruzi</i> | 45  | 1    | 45   |
| Tc00.1047053506265.70  | <i>T. cruzi</i> | 73  | 90   | 162  |
| Tc00.1047053506265.70  | <i>T. cruzi</i> | 105 | 524  | 628  |
| Tc00.1047053506265.80  | <i>T. cruzi</i> | 124 | 151  | 274  |
| Tc00.1047053506267.30  | <i>T. cruzi</i> | 139 | 25   | 163  |
| Tc00.1047053506267.60  | <i>T. cruzi</i> | 175 | 20   | 194  |
| Tc00.1047053506267.70  | <i>T. cruzi</i> | 349 | 29   | 377  |
| Tc00.1047053506267.80  | <i>T. cruzi</i> | 321 | 56   | 376  |
| Tc00.1047053506267.90  | <i>T. cruzi</i> | 232 | 25   | 256  |
| Tc00.1047053506269.10  | <i>T. cruzi</i> | 224 | 27   | 250  |
| Tc00.1047053506269.25  | <i>T. cruzi</i> | 120 | 1    | 120  |
| Tc00.1047053506269.40  | <i>T. cruzi</i> | 366 | 49   | 414  |
| Tc00.1047053506269.70  | <i>T. cruzi</i> | 148 | 28   | 175  |
| Tc00.1047053506269.90  | <i>T. cruzi</i> | 155 | 29   | 183  |
| Tc00.1047053506269.99  | <i>T. cruzi</i> | 336 | 27   | 362  |
| Tc00.1047053506285.10  | <i>T. cruzi</i> | 219 | 1    | 219  |
| Tc00.1047053506285.120 | <i>T. cruzi</i> | 155 | 24   | 178  |
| Tc00.1047053506285.50  | <i>T. cruzi</i> | 189 | 1    | 189  |
| Tc00.1047053506285.80  | <i>T. cruzi</i> | 184 | 1    | 184  |
| Tc00.1047053506285.90  | <i>T. cruzi</i> | 170 | 21   | 190  |
| Tc00.1047053506287.100 | <i>T. cruzi</i> | 42  | 1    | 42   |
| Tc00.1047053506287.100 | <i>T. cruzi</i> | 73  | 122  | 194  |
| Tc00.1047053506287.100 | <i>T. cruzi</i> | 73  | 122  | 194  |
| Tc00.1047053506287.120 | <i>T. cruzi</i> | 233 | 117  | 349  |
| Tc00.1047053506287.150 | <i>T. cruzi</i> | 72  | 38   | 109  |
| Tc00.1047053506287.150 | <i>T. cruzi</i> | 85  | 343  | 427  |
| Tc00.1047053506287.150 | <i>T. cruzi</i> | 85  | 343  | 427  |
| Tc00.1047053506287.170 | <i>T. cruzi</i> | 71  | 22   | 92   |
| Tc00.1047053506287.170 | <i>T. cruzi</i> | 51  | 105  | 155  |
| Tc00.1047053506287.170 | <i>T. cruzi</i> | 181 | 985  | 1165 |
| Tc00.1047053506287.180 | <i>T. cruzi</i> | 52  | 249  | 300  |
| Tc00.1047053506287.20  | <i>T. cruzi</i> | 73  | 90   | 162  |
| Tc00.1047053506287.20  | <i>T. cruzi</i> | 51  | 279  | 329  |
| Tc00.1047053506287.200 | <i>T. cruzi</i> | 46  | 116  | 161  |
| Tc00.1047053506287.200 | <i>T. cruzi</i> | 59  | 315  | 373  |
| Tc00.1047053506287.200 | <i>T. cruzi</i> | 59  | 315  | 373  |
| Tc00.1047053506287.30  | <i>T. cruzi</i> | 109 | 1    | 109  |

|                        |                 |     |      |      |
|------------------------|-----------------|-----|------|------|
| Tc00.1047053506287.80  | <i>T. cruzi</i> | 40  | 1    | 40   |
| Tc00.1047053506287.80  | <i>T. cruzi</i> | 49  | 677  | 725  |
| Tc00.1047053506287.80  | <i>T. cruzi</i> | 46  | 902  | 947  |
| Tc00.1047053506287.80  | <i>T. cruzi</i> | 154 | 1362 | 1515 |
| Tc00.1047053506287.9   | <i>T. cruzi</i> | 64  | 19   | 82   |
| Tc00.1047053506287.9   | <i>T. cruzi</i> | 79  | 122  | 200  |
| Tc00.1047053506287.9   | <i>T. cruzi</i> | 69  | 345  | 413  |
| Tc00.1047053506287.90  | <i>T. cruzi</i> | 48  | 281  | 328  |
| Tc00.1047053506287.90  | <i>T. cruzi</i> | 42  | 356  | 397  |
| Tc00.1047053506287.90  | <i>T. cruzi</i> | 42  | 356  | 397  |
| Tc00.1047053506289.120 | <i>T. cruzi</i> | 313 | 74   | 386  |
| Tc00.1047053506289.130 | <i>T. cruzi</i> | 167 | 161  | 327  |
| Tc00.1047053506289.140 | <i>T. cruzi</i> | 184 | 612  | 795  |
| Tc00.1047053506289.150 | <i>T. cruzi</i> | 302 | 59   | 360  |
| Tc00.1047053506289.160 | <i>T. cruzi</i> | 167 | 201  | 367  |
| Tc00.1047053506289.170 | <i>T. cruzi</i> | 140 | 547  | 686  |
| Tc00.1047053506289.20  | <i>T. cruzi</i> | 43  | 250  | 292  |
| Tc00.1047053506289.200 | <i>T. cruzi</i> | 167 | 161  | 327  |
| Tc00.1047053506289.210 | <i>T. cruzi</i> | 78  | 49   | 126  |
| Tc00.1047053506289.210 | <i>T. cruzi</i> | 165 | 547  | 711  |
| Tc00.1047053506289.240 | <i>T. cruzi</i> | 167 | 161  | 327  |
| Tc00.1047053506289.30  | <i>T. cruzi</i> | 45  | 194  | 238  |
| Tc00.1047053506289.40  | <i>T. cruzi</i> | 52  | 103  | 154  |
| Tc00.1047053506289.50  | <i>T. cruzi</i> | 45  | 471  | 515  |
| Tc00.1047053506289.50  | <i>T. cruzi</i> | 47  | 595  | 641  |
| Tc00.1047053506289.50  | <i>T. cruzi</i> | 211 | 705  | 915  |
| Tc00.1047053506289.60  | <i>T. cruzi</i> | 93  | 190  | 282  |
| Tc00.1047053506289.70  | <i>T. cruzi</i> | 131 | 46   | 176  |
| Tc00.1047053506289.70  | <i>T. cruzi</i> | 66  | 580  | 645  |
| Tc00.1047053506289.74  | <i>T. cruzi</i> | 59  | 321  | 379  |
| Tc00.1047053506289.74  | <i>T. cruzi</i> | 67  | 410  | 476  |
| Tc00.1047053506289.74  | <i>T. cruzi</i> | 77  | 541  | 617  |
| Tc00.1047053506289.94  | <i>T. cruzi</i> | 151 | 155  | 305  |
| Tc00.1047053506291.10  | <i>T. cruzi</i> | 319 | 58   | 376  |
| Tc00.1047053506291.20  | <i>T. cruzi</i> | 167 | 160  | 326  |
| Tc00.1047053506311.30  | <i>T. cruzi</i> | 193 | 78   | 270  |
| Tc00.1047053506341.20  | <i>T. cruzi</i> | 42  | 1    | 42   |
| Tc00.1047053506341.30  | <i>T. cruzi</i> | 51  | 206  | 256  |
| Tc00.1047053506341.50  | <i>T. cruzi</i> | 40  | 1    | 40   |
| Tc00.1047053506341.50  | <i>T. cruzi</i> | 295 | 707  | 1001 |
| Tc00.1047053506343.20  | <i>T. cruzi</i> | 49  | 1    | 49   |
| Tc00.1047053506343.20  | <i>T. cruzi</i> | 84  | 435  | 518  |
| Tc00.1047053506343.20  | <i>T. cruzi</i> | 84  | 435  | 518  |
| Tc00.1047053506343.51  | <i>T. cruzi</i> | 55  | 1    | 55   |
| Tc00.1047053506345.40  | <i>T. cruzi</i> | 46  | 1    | 46   |
| Tc00.1047053506345.40  | <i>T. cruzi</i> | 43  | 65   | 107  |
| Tc00.1047053506345.40  | <i>T. cruzi</i> | 70  | 705  | 774  |

|                        |                 |     |      |      |
|------------------------|-----------------|-----|------|------|
| Tc00.1047053506345.90  | <i>T. cruzi</i> | 42  | 1    | 42   |
| Tc00.1047053506345.90  | <i>T. cruzi</i> | 178 | 657  | 834  |
| Tc00.1047053506351.20  | <i>T. cruzi</i> | 52  | 1    | 52   |
| Tc00.1047053506351.20  | <i>T. cruzi</i> | 54  | 292  | 345  |
| Tc00.1047053506351.30  | <i>T. cruzi</i> | 80  | 53   | 132  |
| Tc00.1047053506351.30  | <i>T. cruzi</i> | 79  | 405  | 483  |
| Tc00.1047053506351.30  | <i>T. cruzi</i> | 53  | 602  | 654  |
| Tc00.1047053506351.40  | <i>T. cruzi</i> | 45  | 80   | 124  |
| Tc00.1047053506351.50  | <i>T. cruzi</i> | 331 | 51   | 381  |
| Tc00.1047053506351.60  | <i>T. cruzi</i> | 52  | 12   | 63   |
| Tc00.1047053506351.60  | <i>T. cruzi</i> | 171 | 136  | 306  |
| Tc00.1047053506351.60  | <i>T. cruzi</i> | 111 | 415  | 525  |
| Tc00.1047053506351.70  | <i>T. cruzi</i> | 109 | 344  | 452  |
| Tc00.1047053506351.70  | <i>T. cruzi</i> | 63  | 758  | 820  |
| Tc00.1047053506351.70  | <i>T. cruzi</i> | 108 | 925  | 1032 |
| Tc00.1047053506351.80  | <i>T. cruzi</i> | 61  | 843  | 903  |
| Tc00.1047053506357.10  | <i>T. cruzi</i> | 62  | 467  | 528  |
| Tc00.1047053506357.10  | <i>T. cruzi</i> | 90  | 560  | 649  |
| Tc00.1047053506357.100 | <i>T. cruzi</i> | 94  | 68   | 161  |
| Tc00.1047053506357.110 | <i>T. cruzi</i> | 60  | 44   | 103  |
| Tc00.1047053506357.130 | <i>T. cruzi</i> | 61  | 414  | 474  |
| Tc00.1047053506357.130 | <i>T. cruzi</i> | 77  | 772  | 848  |
| Tc00.1047053506357.130 | <i>T. cruzi</i> | 45  | 1790 | 1834 |
| Tc00.1047053506357.150 | <i>T. cruzi</i> | 57  | 124  | 180  |
| Tc00.1047053506357.150 | <i>T. cruzi</i> | 42  | 187  | 228  |
| Tc00.1047053506357.150 | <i>T. cruzi</i> | 79  | 279  | 357  |
| Tc00.1047053506357.150 | <i>T. cruzi</i> | 40  | 378  | 417  |
| Tc00.1047053506357.150 | <i>T. cruzi</i> | 57  | 462  | 518  |
| Tc00.1047053506357.150 | <i>T. cruzi</i> | 42  | 547  | 588  |
| Tc00.1047053506357.150 | <i>T. cruzi</i> | 115 | 683  | 797  |
| Tc00.1047053506357.150 | <i>T. cruzi</i> | 79  | 872  | 950  |
| Tc00.1047053506357.150 | <i>T. cruzi</i> | 72  | 1023 | 1094 |
| Tc00.1047053506357.160 | <i>T. cruzi</i> | 56  | 1    | 56   |
| Tc00.1047053506357.160 | <i>T. cruzi</i> | 69  | 77   | 145  |
| Tc00.1047053506357.160 | <i>T. cruzi</i> | 46  | 387  | 432  |
| Tc00.1047053506357.160 | <i>T. cruzi</i> | 70  | 695  | 764  |
| Tc00.1047053506357.160 | <i>T. cruzi</i> | 54  | 1155 | 1208 |
| Tc00.1047053506357.160 | <i>T. cruzi</i> | 89  | 1211 | 1299 |
| Tc00.1047053506357.160 | <i>T. cruzi</i> | 113 | 1334 | 1446 |
| Tc00.1047053506357.160 | <i>T. cruzi</i> | 68  | 1540 | 1607 |
| Tc00.1047053506357.160 | <i>T. cruzi</i> | 50  | 1666 | 1715 |
| Tc00.1047053506357.160 | <i>T. cruzi</i> | 65  | 1749 | 1813 |
| Tc00.1047053506357.180 | <i>T. cruzi</i> | 93  | 509  | 601  |
| Tc00.1047053506357.180 | <i>T. cruzi</i> | 106 | 768  | 873  |
| Tc00.1047053506357.180 | <i>T. cruzi</i> | 48  | 1368 | 1415 |
| Tc00.1047053506357.199 | <i>T. cruzi</i> | 45  | 81   | 125  |
| Tc00.1047053506357.199 | <i>T. cruzi</i> | 57  | 281  | 337  |

|                        |                 |     |      |      |
|------------------------|-----------------|-----|------|------|
| Tc00.1047053506357.199 | <i>T. cruzi</i> | 72  | 355  | 426  |
| Tc00.1047053506357.20  | <i>T. cruzi</i> | 74  | 186  | 259  |
| Tc00.1047053506357.20  | <i>T. cruzi</i> | 54  | 358  | 411  |
| Tc00.1047053506357.29  | <i>T. cruzi</i> | 93  | 1    | 93   |
| Tc00.1047053506357.60  | <i>T. cruzi</i> | 132 | 109  | 240  |
| Tc00.1047053506357.60  | <i>T. cruzi</i> | 158 | 257  | 414  |
| Tc00.1047053506357.60  | <i>T. cruzi</i> | 69  | 488  | 556  |
| Tc00.1047053506357.60  | <i>T. cruzi</i> | 157 | 562  | 718  |
| Tc00.1047053506357.60  | <i>T. cruzi</i> | 119 | 865  | 983  |
| Tc00.1047053506357.60  | <i>T. cruzi</i> | 48  | 991  | 1038 |
| Tc00.1047053506357.60  | <i>T. cruzi</i> | 53  | 1047 | 1099 |
| Tc00.1047053506357.60  | <i>T. cruzi</i> | 87  | 1114 | 1200 |
| Tc00.1047053506357.80  | <i>T. cruzi</i> | 73  | 45   | 117  |
| Tc00.1047053506357.80  | <i>T. cruzi</i> | 162 | 172  | 333  |
| Tc00.1047053506357.80  | <i>T. cruzi</i> | 83  | 491  | 573  |
| Tc00.1047053506357.80  | <i>T. cruzi</i> | 126 | 594  | 719  |
| Tc00.1047053506357.80  | <i>T. cruzi</i> | 55  | 849  | 903  |
| Tc00.1047053506357.80  | <i>T. cruzi</i> | 201 | 989  | 1189 |
| Tc00.1047053506357.80  | <i>T. cruzi</i> | 47  | 1241 | 1287 |
| Tc00.1047053506357.80  | <i>T. cruzi</i> | 118 | 1294 | 1411 |
| Tc00.1047053506357.80  | <i>T. cruzi</i> | 66  | 1477 | 1542 |
| Tc00.1047053506359.40  | <i>T. cruzi</i> | 90  | 1    | 90   |
| Tc00.1047053506359.40  | <i>T. cruzi</i> | 47  | 310  | 356  |
| Tc00.1047053506359.40  | <i>T. cruzi</i> | 253 | 557  | 809  |
| Tc00.1047053506359.40  | <i>T. cruzi</i> | 105 | 849  | 953  |
| Tc00.1047053506359.50  | <i>T. cruzi</i> | 181 | 1    | 181  |
| Tc00.1047053506359.90  | <i>T. cruzi</i> | 281 | 185  | 465  |
| Tc00.1047053506363.130 | <i>T. cruzi</i> | 93  | 1    | 93   |
| Tc00.1047053506363.130 | <i>T. cruzi</i> | 40  | 108  | 147  |
| Tc00.1047053506363.130 | <i>T. cruzi</i> | 40  | 108  | 147  |
| Tc00.1047053506363.140 | <i>T. cruzi</i> | 90  | 1    | 90   |
| Tc00.1047053506363.140 | <i>T. cruzi</i> | 167 | 118  | 284  |
| Tc00.1047053506363.150 | <i>T. cruzi</i> | 67  | 1    | 67   |
| Tc00.1047053506363.50  | <i>T. cruzi</i> | 47  | 100  | 146  |
| Tc00.1047053506363.50  | <i>T. cruzi</i> | 65  | 622  | 686  |
| Tc00.1047053506363.50  | <i>T. cruzi</i> | 70  | 692  | 761  |
| Tc00.1047053506363.50  | <i>T. cruzi</i> | 55  | 808  | 862  |
| Tc00.1047053506363.50  | <i>T. cruzi</i> | 59  | 875  | 933  |
| Tc00.1047053506363.50  | <i>T. cruzi</i> | 46  | 981  | 1026 |
| Tc00.1047053506367.10  | <i>T. cruzi</i> | 46  | 23   | 68   |
| Tc00.1047053506367.120 | <i>T. cruzi</i> | 98  | 786  | 883  |
| Tc00.1047053506367.140 | <i>T. cruzi</i> | 126 | 10   | 135  |
| Tc00.1047053506367.140 | <i>T. cruzi</i> | 83  | 524  | 606  |
| Tc00.1047053506367.160 | <i>T. cruzi</i> | 135 | 1    | 135  |
| Tc00.1047053506367.160 | <i>T. cruzi</i> | 43  | 214  | 256  |
| Tc00.1047053506367.160 | <i>T. cruzi</i> | 56  | 290  | 345  |
| Tc00.1047053506367.170 | <i>T. cruzi</i> | 257 | 183  | 439  |



|                        |                 |     |      |      |
|------------------------|-----------------|-----|------|------|
| Tc00.1047053506367.40  | <i>T. cruzi</i> | 40  | 67   | 106  |
| Tc00.1047053506367.40  | <i>T. cruzi</i> | 65  | 203  | 267  |
| Tc00.1047053506367.40  | <i>T. cruzi</i> | 65  | 203  | 267  |
| Tc00.1047053506367.60  | <i>T. cruzi</i> | 44  | 717  | 760  |
| Tc00.1047053506367.80  | <i>T. cruzi</i> | 79  | 76   | 154  |
| Tc00.1047053506367.80  | <i>T. cruzi</i> | 62  | 185  | 246  |
| Tc00.1047053506367.89  | <i>T. cruzi</i> | 50  | 139  | 188  |
| Tc00.1047053506369.20  | <i>T. cruzi</i> | 47  | 420  | 466  |
| Tc00.1047053506369.40  | <i>T. cruzi</i> | 51  | 71   | 121  |
| Tc00.1047053506369.40  | <i>T. cruzi</i> | 96  | 220  | 315  |
| Tc00.1047053506369.40  | <i>T. cruzi</i> | 48  | 576  | 623  |
| Tc00.1047053506369.50  | <i>T. cruzi</i> | 62  | 146  | 207  |
| Tc00.1047053506369.70  | <i>T. cruzi</i> | 85  | 56   | 140  |
| Tc00.1047053506375.100 | <i>T. cruzi</i> | 83  | 689  | 771  |
| Tc00.1047053506375.100 | <i>T. cruzi</i> | 91  | 927  | 1017 |
| Tc00.1047053506375.100 | <i>T. cruzi</i> | 91  | 927  | 1017 |
| Tc00.1047053506375.110 | <i>T. cruzi</i> | 86  | 1    | 86   |
| Tc00.1047053506375.120 | <i>T. cruzi</i> | 133 | 164  | 296  |
| Tc00.1047053506375.50  | <i>T. cruzi</i> | 55  | 213  | 267  |
| Tc00.1047053506375.50  | <i>T. cruzi</i> | 41  | 2003 | 2043 |
| Tc00.1047053506375.50  | <i>T. cruzi</i> | 130 | 2822 | 2951 |
| Tc00.1047053506375.50  | <i>T. cruzi</i> | 89  | 3399 | 3487 |
| Tc00.1047053506397.10  | <i>T. cruzi</i> | 48  | 1    | 48   |
| Tc00.1047053506399.20  | <i>T. cruzi</i> | 62  | 9    | 70   |
| Tc00.1047053506399.20  | <i>T. cruzi</i> | 40  | 134  | 173  |
| Tc00.1047053506399.20  | <i>T. cruzi</i> | 94  | 220  | 313  |
| Tc00.1047053506399.30  | <i>T. cruzi</i> | 195 | 268  | 462  |
| Tc00.1047053506399.40  | <i>T. cruzi</i> | 79  | 1    | 79   |
| Tc00.1047053506399.40  | <i>T. cruzi</i> | 81  | 81   | 161  |
| Tc00.1047053506399.40  | <i>T. cruzi</i> | 45  | 192  | 236  |
| Tc00.1047053506399.40  | <i>T. cruzi</i> | 172 | 430  | 601  |
| Tc00.1047053506399.80  | <i>T. cruzi</i> | 108 | 23   | 130  |
| Tc00.1047053506401.100 | <i>T. cruzi</i> | 185 | 1    | 185  |
| Tc00.1047053506401.100 | <i>T. cruzi</i> | 46  | 193  | 238  |
| Tc00.1047053506401.100 | <i>T. cruzi</i> | 79  | 607  | 685  |
| Tc00.1047053506401.110 | <i>T. cruzi</i> | 79  | 91   | 169  |
| Tc00.1047053506401.110 | <i>T. cruzi</i> | 204 | 333  | 536  |
| Tc00.1047053506401.110 | <i>T. cruzi</i> | 40  | 553  | 592  |
| Tc00.1047053506401.110 | <i>T. cruzi</i> | 60  | 739  | 798  |
| Tc00.1047053506401.110 | <i>T. cruzi</i> | 56  | 875  | 930  |
| Tc00.1047053506401.110 | <i>T. cruzi</i> | 77  | 996  | 1072 |
| Tc00.1047053506401.130 | <i>T. cruzi</i> | 74  | 1    | 74   |
| Tc00.1047053506401.140 | <i>T. cruzi</i> | 55  | 126  | 180  |
| Tc00.1047053506401.140 | <i>T. cruzi</i> | 66  | 596  | 661  |
| Tc00.1047053506401.140 | <i>T. cruzi</i> | 60  | 793  | 852  |
| Tc00.1047053506401.140 | <i>T. cruzi</i> | 65  | 936  | 1000 |
| Tc00.1047053506401.140 | <i>T. cruzi</i> | 53  | 1117 | 1169 |

|                        |                 |     |      |      |
|------------------------|-----------------|-----|------|------|
| Tc00.1047053506401.140 | <i>T. cruzi</i> | 42  | 1182 | 1223 |
| Tc00.1047053506401.140 | <i>T. cruzi</i> | 264 | 1238 | 1501 |
| Tc00.1047053506401.160 | <i>T. cruzi</i> | 261 | 30   | 290  |
| Tc00.1047053506401.170 | <i>T. cruzi</i> | 44  | 1    | 44   |
| Tc00.1047053506401.190 | <i>T. cruzi</i> | 134 | 1    | 134  |
| Tc00.1047053506401.190 | <i>T. cruzi</i> | 523 | 144  | 666  |
| Tc00.1047053506401.190 | <i>T. cruzi</i> | 92  | 683  | 774  |
| Tc00.1047053506401.200 | <i>T. cruzi</i> | 49  | 180  | 228  |
| Tc00.1047053506401.210 | <i>T. cruzi</i> | 131 | 146  | 276  |
| Tc00.1047053506401.230 | <i>T. cruzi</i> | 145 | 18   | 162  |
| Tc00.1047053506401.230 | <i>T. cruzi</i> | 41  | 593  | 633  |
| Tc00.1047053506401.230 | <i>T. cruzi</i> | 58  | 907  | 964  |
| Tc00.1047053506401.24  | <i>T. cruzi</i> | 114 | 1    | 114  |
| Tc00.1047053506401.24  | <i>T. cruzi</i> | 68  | 200  | 267  |
| Tc00.1047053506401.24  | <i>T. cruzi</i> | 55  | 322  | 376  |
| Tc00.1047053506401.24  | <i>T. cruzi</i> | 71  | 601  | 671  |
| Tc00.1047053506401.24  | <i>T. cruzi</i> | 123 | 1092 | 1214 |
| Tc00.1047053506401.24  | <i>T. cruzi</i> | 62  | 1656 | 1717 |
| Tc00.1047053506401.24  | <i>T. cruzi</i> | 75  | 2089 | 2163 |
| Tc00.1047053506401.24  | <i>T. cruzi</i> | 54  | 2230 | 2283 |
| Tc00.1047053506401.24  | <i>T. cruzi</i> | 346 | 2406 | 2751 |
| Tc00.1047053506401.240 | <i>T. cruzi</i> | 304 | 1    | 304  |
| Tc00.1047053506401.250 | <i>T. cruzi</i> | 134 | 1    | 134  |
| Tc00.1047053506401.250 | <i>T. cruzi</i> | 271 | 210  | 480  |
| Tc00.1047053506401.280 | <i>T. cruzi</i> | 172 | 88   | 259  |
| Tc00.1047053506401.280 | <i>T. cruzi</i> | 103 | 269  | 371  |
| Tc00.1047053506401.280 | <i>T. cruzi</i> | 57  | 396  | 452  |
| Tc00.1047053506401.280 | <i>T. cruzi</i> | 41  | 501  | 541  |
| Tc00.1047053506401.280 | <i>T. cruzi</i> | 75  | 609  | 683  |
| Tc00.1047053506401.280 | <i>T. cruzi</i> | 45  | 743  | 787  |
| Tc00.1047053506401.280 | <i>T. cruzi</i> | 306 | 1036 | 1341 |
| Tc00.1047053506401.280 | <i>T. cruzi</i> | 48  | 1343 | 1390 |
| Tc00.1047053506401.280 | <i>T. cruzi</i> | 65  | 1475 | 1539 |
| Tc00.1047053506401.290 | <i>T. cruzi</i> | 140 | 398  | 537  |
| Tc00.1047053506401.290 | <i>T. cruzi</i> | 59  | 650  | 708  |
| Tc00.1047053506401.290 | <i>T. cruzi</i> | 147 | 799  | 945  |
| Tc00.1047053506401.300 | <i>T. cruzi</i> | 79  | 57   | 135  |
| Tc00.1047053506401.300 | <i>T. cruzi</i> | 205 | 143  | 347  |
| Tc00.1047053506401.300 | <i>T. cruzi</i> | 144 | 403  | 546  |
| Tc00.1047053506401.310 | <i>T. cruzi</i> | 143 | 1    | 143  |
| Tc00.1047053506401.320 | <i>T. cruzi</i> | 85  | 1    | 85   |
| Tc00.1047053506401.320 | <i>T. cruzi</i> | 65  | 125  | 189  |
| Tc00.1047053506401.330 | <i>T. cruzi</i> | 134 | 195  | 328  |
| Tc00.1047053506401.350 | <i>T. cruzi</i> | 68  | 2609 | 2676 |
| Tc00.1047053506401.350 | <i>T. cruzi</i> | 49  | 2821 | 2869 |
| Tc00.1047053506401.350 | <i>T. cruzi</i> | 40  | 3736 | 3775 |
| Tc00.1047053506401.350 | <i>T. cruzi</i> | 43  | 3809 | 3851 |

|                        |                 |     |      |      |
|------------------------|-----------------|-----|------|------|
| Tc00.1047053506401.350 | <i>T. cruzi</i> | 48  | 4163 | 4210 |
| Tc00.1047053506401.50  | <i>T. cruzi</i> | 40  | 57   | 96   |
| Tc00.1047053506401.70  | <i>T. cruzi</i> | 90  | 356  | 445  |
| Tc00.1047053506401.70  | <i>T. cruzi</i> | 78  | 803  | 880  |
| Tc00.1047053506401.70  | <i>T. cruzi</i> | 78  | 803  | 880  |
| Tc00.1047053506401.80  | <i>T. cruzi</i> | 458 | 40   | 497  |
| Tc00.1047053506401.80  | <i>T. cruzi</i> | 54  | 499  | 552  |
| Tc00.1047053506401.80  | <i>T. cruzi</i> | 361 | 570  | 930  |
| Tc00.1047053506401.80  | <i>T. cruzi</i> | 449 | 953  | 1401 |
| Tc00.1047053506401.90  | <i>T. cruzi</i> | 58  | 1    | 58   |
| Tc00.1047053506401.90  | <i>T. cruzi</i> | 125 | 65   | 189  |
| Tc00.1047053506405.100 | <i>T. cruzi</i> | 45  | 1032 | 1076 |
| Tc00.1047053506405.149 | <i>T. cruzi</i> | 45  | 96   | 140  |
| Tc00.1047053506405.40  | <i>T. cruzi</i> | 72  | 1    | 72   |
| Tc00.1047053506405.40  | <i>T. cruzi</i> | 53  | 214  | 266  |
| Tc00.1047053506405.43  | <i>T. cruzi</i> | 47  | 101  | 147  |
| Tc00.1047053506405.43  | <i>T. cruzi</i> | 74  | 157  | 230  |
| Tc00.1047053506405.43  | <i>T. cruzi</i> | 74  | 157  | 230  |
| Tc00.1047053506405.60  | <i>T. cruzi</i> | 64  | 1    | 64   |
| Tc00.1047053506405.80  | <i>T. cruzi</i> | 140 | 1    | 140  |
| Tc00.1047053506407.10  | <i>T. cruzi</i> | 41  | 834  | 874  |
| Tc00.1047053506407.100 | <i>T. cruzi</i> | 136 | 1    | 136  |
| Tc00.1047053506407.100 | <i>T. cruzi</i> | 234 | 147  | 380  |
| Tc00.1047053506407.20  | <i>T. cruzi</i> | 300 | 1    | 300  |
| Tc00.1047053506407.30  | <i>T. cruzi</i> | 49  | 247  | 295  |
| Tc00.1047053506407.30  | <i>T. cruzi</i> | 94  | 335  | 428  |
| Tc00.1047053506407.30  | <i>T. cruzi</i> | 45  | 457  | 501  |
| Tc00.1047053506407.30  | <i>T. cruzi</i> | 66  | 622  | 687  |
| Tc00.1047053506407.40  | <i>T. cruzi</i> | 106 | 222  | 327  |
| Tc00.1047053506407.40  | <i>T. cruzi</i> | 56  | 440  | 495  |
| Tc00.1047053506407.40  | <i>T. cruzi</i> | 56  | 440  | 495  |
| Tc00.1047053506407.60  | <i>T. cruzi</i> | 74  | 123  | 196  |
| Tc00.1047053506407.80  | <i>T. cruzi</i> | 50  | 1    | 50   |
| Tc00.1047053506407.80  | <i>T. cruzi</i> | 240 | 208  | 447  |
| Tc00.1047053506407.80  | <i>T. cruzi</i> | 40  | 514  | 553  |
| Tc00.1047053506407.80  | <i>T. cruzi</i> | 47  | 564  | 610  |
| Tc00.1047053506407.90  | <i>T. cruzi</i> | 61  | 1    | 61   |
| Tc00.1047053506407.90  | <i>T. cruzi</i> | 183 | 95   | 277  |
| Tc00.1047053506407.90  | <i>T. cruzi</i> | 387 | 357  | 743  |
| Tc00.1047053506407.90  | <i>T. cruzi</i> | 155 | 768  | 922  |
| Tc00.1047053506407.90  | <i>T. cruzi</i> | 65  | 974  | 1038 |
| Tc00.1047053506407.90  | <i>T. cruzi</i> | 273 | 1076 | 1348 |
| Tc00.1047053506407.90  | <i>T. cruzi</i> | 43  | 1362 | 1404 |
| Tc00.1047053506409.10  | <i>T. cruzi</i> | 56  | 24   | 79   |
| Tc00.1047053506409.100 | <i>T. cruzi</i> | 247 | 34   | 280  |
| Tc00.1047053506409.110 | <i>T. cruzi</i> | 78  | 32   | 109  |
| Tc00.1047053506409.140 | <i>T. cruzi</i> | 186 | 27   | 212  |

|                        |                 |     |     |     |
|------------------------|-----------------|-----|-----|-----|
| Tc00.1047053506409.170 | <i>T. cruzi</i> | 48  | 1   | 48  |
| Tc00.1047053506409.170 | <i>T. cruzi</i> | 138 | 198 | 335 |
| Tc00.1047053506409.170 | <i>T. cruzi</i> | 44  | 410 | 453 |
| Tc00.1047053506409.170 | <i>T. cruzi</i> | 190 | 723 | 912 |
| Tc00.1047053506409.200 | <i>T. cruzi</i> | 171 | 18  | 188 |
| Tc00.1047053506409.220 | <i>T. cruzi</i> | 98  | 169 | 266 |
| Tc00.1047053506409.220 | <i>T. cruzi</i> | 58  | 332 | 389 |
| Tc00.1047053506409.220 | <i>T. cruzi</i> | 40  | 425 | 464 |
| Tc00.1047053506409.240 | <i>T. cruzi</i> | 101 | 1   | 101 |
| Tc00.1047053506409.30  | <i>T. cruzi</i> | 336 | 24  | 359 |
| Tc00.1047053506409.50  | <i>T. cruzi</i> | 166 | 1   | 166 |
| Tc00.1047053506409.60  | <i>T. cruzi</i> | 89  | 65  | 153 |
| Tc00.1047053506409.90  | <i>T. cruzi</i> | 379 | 27  | 405 |
| Tc00.1047053506411.10  | <i>T. cruzi</i> | 64  | 85  | 148 |
| Tc00.1047053506413.40  | <i>T. cruzi</i> | 40  | 179 | 218 |
| Tc00.1047053506413.50  | <i>T. cruzi</i> | 41  | 45  | 85  |
| Tc00.1047053506413.60  | <i>T. cruzi</i> | 58  | 118 | 175 |
| Tc00.1047053506413.70  | <i>T. cruzi</i> | 44  | 1   | 44  |
| Tc00.1047053506413.70  | <i>T. cruzi</i> | 81  | 327 | 407 |
| Tc00.1047053506413.89  | <i>T. cruzi</i> | 43  | 1   | 43  |
| Tc00.1047053506455.30  | <i>T. cruzi</i> | 45  | 1   | 45  |
| Tc00.1047053506457.10  | <i>T. cruzi</i> | 176 | 1   | 176 |
| Tc00.1047053506457.110 | <i>T. cruzi</i> | 148 | 119 | 266 |
| Tc00.1047053506457.110 | <i>T. cruzi</i> | 47  | 274 | 320 |
| Tc00.1047053506457.110 | <i>T. cruzi</i> | 150 | 368 | 517 |
| Tc00.1047053506457.120 | <i>T. cruzi</i> | 132 | 594 | 725 |
| Tc00.1047053506457.130 | <i>T. cruzi</i> | 53  | 133 | 185 |
| Tc00.1047053506457.140 | <i>T. cruzi</i> | 84  | 34  | 117 |
| Tc00.1047053506457.149 | <i>T. cruzi</i> | 61  | 198 | 258 |
| Tc00.1047053506457.20  | <i>T. cruzi</i> | 95  | 1   | 95  |
| Tc00.1047053506457.20  | <i>T. cruzi</i> | 51  | 197 | 247 |
| Tc00.1047053506457.20  | <i>T. cruzi</i> | 51  | 197 | 247 |
| Tc00.1047053506457.50  | <i>T. cruzi</i> | 52  | 1   | 52  |
| Tc00.1047053506457.50  | <i>T. cruzi</i> | 42  | 158 | 199 |
| Tc00.1047053506457.50  | <i>T. cruzi</i> | 113 | 395 | 507 |
| Tc00.1047053506457.50  | <i>T. cruzi</i> | 55  | 579 | 633 |
| Tc00.1047053506457.50  | <i>T. cruzi</i> | 60  | 685 | 744 |
| Tc00.1047053506457.50  | <i>T. cruzi</i> | 69  | 819 | 887 |
| Tc00.1047053506457.70  | <i>T. cruzi</i> | 41  | 1   | 41  |
| Tc00.1047053506457.70  | <i>T. cruzi</i> | 42  | 117 | 158 |
| Tc00.1047053506457.70  | <i>T. cruzi</i> | 45  | 181 | 225 |
| Tc00.1047053506457.80  | <i>T. cruzi</i> | 78  | 28  | 105 |
| Tc00.1047053506457.80  | <i>T. cruzi</i> | 80  | 136 | 215 |
| Tc00.1047053506457.80  | <i>T. cruzi</i> | 99  | 243 | 341 |
| Tc00.1047053506457.80  | <i>T. cruzi</i> | 41  | 358 | 398 |
| Tc00.1047053506457.80  | <i>T. cruzi</i> | 83  | 421 | 503 |
| Tc00.1047053506457.80  | <i>T. cruzi</i> | 119 | 576 | 694 |

|                       |                 |     |      |      |
|-----------------------|-----------------|-----|------|------|
| Tc00.1047053506457.80 | <i>T. cruzi</i> | 43  | 748  | 790  |
| Tc00.1047053506457.90 | <i>T. cruzi</i> | 168 | 91   | 258  |
| Tc00.1047053506457.99 | <i>T. cruzi</i> | 45  | 74   | 118  |
| Tc00.1047053506463.10 | <i>T. cruzi</i> | 41  | 56   | 96   |
| Tc00.1047053506465.10 | <i>T. cruzi</i> | 46  | 110  | 155  |
| Tc00.1047053506465.20 | <i>T. cruzi</i> | 50  | 1    | 50   |
| Tc00.1047053506465.20 | <i>T. cruzi</i> | 85  | 177  | 261  |
| Tc00.1047053506465.30 | <i>T. cruzi</i> | 51  | 1    | 51   |
| Tc00.1047053506465.30 | <i>T. cruzi</i> | 67  | 205  | 271  |
| Tc00.1047053506465.30 | <i>T. cruzi</i> | 78  | 295  | 372  |
| Tc00.1047053506465.30 | <i>T. cruzi</i> | 128 | 430  | 557  |
| Tc00.1047053506465.30 | <i>T. cruzi</i> | 53  | 666  | 718  |
| Tc00.1047053506465.30 | <i>T. cruzi</i> | 53  | 806  | 858  |
| Tc00.1047053506465.30 | <i>T. cruzi</i> | 117 | 1002 | 1118 |
| Tc00.1047053506465.30 | <i>T. cruzi</i> | 56  | 1137 | 1192 |
| Tc00.1047053506465.30 | <i>T. cruzi</i> | 48  | 1269 | 1316 |
| Tc00.1047053506465.40 | <i>T. cruzi</i> | 61  | 28   | 88   |
| Tc00.1047053506465.40 | <i>T. cruzi</i> | 69  | 132  | 200  |
| Tc00.1047053506465.40 | <i>T. cruzi</i> | 57  | 433  | 489  |
| Tc00.1047053506465.40 | <i>T. cruzi</i> | 166 | 506  | 671  |
| Tc00.1047053506465.40 | <i>T. cruzi</i> | 203 | 848  | 1050 |
| Tc00.1047053506465.5  | <i>T. cruzi</i> | 61  | 23   | 83   |
| Tc00.1047053506465.5  | <i>T. cruzi</i> | 64  | 89   | 152  |
| Tc00.1047053506465.5  | <i>T. cruzi</i> | 71  | 272  | 342  |
| Tc00.1047053506465.5  | <i>T. cruzi</i> | 100 | 385  | 484  |
| Tc00.1047053506467.10 | <i>T. cruzi</i> | 50  | 59   | 108  |
| Tc00.1047053506467.10 | <i>T. cruzi</i> | 42  | 420  | 461  |
| Tc00.1047053506467.10 | <i>T. cruzi</i> | 40  | 644  | 683  |
| Tc00.1047053506467.20 | <i>T. cruzi</i> | 116 | 38   | 153  |
| Tc00.1047053506467.20 | <i>T. cruzi</i> | 117 | 180  | 296  |
| Tc00.1047053506467.20 | <i>T. cruzi</i> | 118 | 331  | 448  |
| Tc00.1047053506467.29 | <i>T. cruzi</i> | 92  | 36   | 127  |
| Tc00.1047053506467.40 | <i>T. cruzi</i> | 66  | 811  | 876  |
| Tc00.1047053506473.14 | <i>T. cruzi</i> | 48  | 1    | 48   |
| Tc00.1047053506473.14 | <i>T. cruzi</i> | 42  | 86   | 127  |
| Tc00.1047053506473.14 | <i>T. cruzi</i> | 42  | 86   | 127  |
| Tc00.1047053506473.20 | <i>T. cruzi</i> | 62  | 45   | 106  |
| Tc00.1047053506473.20 | <i>T. cruzi</i> | 48  | 140  | 187  |
| Tc00.1047053506473.20 | <i>T. cruzi</i> | 107 | 257  | 363  |
| Tc00.1047053506473.20 | <i>T. cruzi</i> | 48  | 462  | 509  |
| Tc00.1047053506473.20 | <i>T. cruzi</i> | 104 | 529  | 632  |
| Tc00.1047053506481.20 | <i>T. cruzi</i> | 40  | 6    | 45   |
| Tc00.1047053506481.20 | <i>T. cruzi</i> | 177 | 139  | 315  |
| Tc00.1047053506481.20 | <i>T. cruzi</i> | 70  | 454  | 523  |
| Tc00.1047053506481.20 | <i>T. cruzi</i> | 177 | 561  | 737  |
| Tc00.1047053506481.30 | <i>T. cruzi</i> | 55  | 59   | 113  |
| Tc00.1047053506481.30 | <i>T. cruzi</i> | 41  | 278  | 318  |

|                        |                 |     |      |      |
|------------------------|-----------------|-----|------|------|
| Tc00.1047053506481.39  | <i>T. cruzi</i> | 42  | 28   | 69   |
| Tc00.1047053506481.39  | <i>T. cruzi</i> | 79  | 102  | 180  |
| Tc00.1047053506481.39  | <i>T. cruzi</i> | 154 | 462  | 615  |
| Tc00.1047053506481.39  | <i>T. cruzi</i> | 338 | 737  | 1074 |
| Tc00.1047053506481.39  | <i>T. cruzi</i> | 237 | 1095 | 1331 |
| Tc00.1047053506481.39  | <i>T. cruzi</i> | 47  | 1345 | 1391 |
| Tc00.1047053506481.39  | <i>T. cruzi</i> | 212 | 1414 | 1625 |
| Tc00.1047053506483.10  | <i>T. cruzi</i> | 42  | 507  | 548  |
| Tc00.1047053506483.60  | <i>T. cruzi</i> | 46  | 244  | 289  |
| Tc00.1047053506493.20  | <i>T. cruzi</i> | 213 | 1    | 213  |
| Tc00.1047053506493.30  | <i>T. cruzi</i> | 78  | 1    | 78   |
| Tc00.1047053506493.40  | <i>T. cruzi</i> | 93  | 413  | 505  |
| Tc00.1047053506493.40  | <i>T. cruzi</i> | 47  | 568  | 614  |
| Tc00.1047053506493.40  | <i>T. cruzi</i> | 47  | 568  | 614  |
| Tc00.1047053506493.60  | <i>T. cruzi</i> | 75  | 24   | 98   |
| Tc00.1047053506493.70  | <i>T. cruzi</i> | 53  | 1    | 53   |
| Tc00.1047053506493.70  | <i>T. cruzi</i> | 130 | 59   | 188  |
| Tc00.1047053506493.70  | <i>T. cruzi</i> | 221 | 1009 | 1229 |
| Tc00.1047053506493.80  | <i>T. cruzi</i> | 50  | 383  | 432  |
| Tc00.1047053506493.80  | <i>T. cruzi</i> | 114 | 500  | 613  |
| Tc00.1047053506493.80  | <i>T. cruzi</i> | 41  | 789  | 829  |
| Tc00.1047053506493.9   | <i>T. cruzi</i> | 283 | 147  | 429  |
| Tc00.1047053506493.90  | <i>T. cruzi</i> | 63  | 493  | 555  |
| Tc00.1047053506495.20  | <i>T. cruzi</i> | 40  | 211  | 250  |
| Tc00.1047053506495.20  | <i>T. cruzi</i> | 49  | 875  | 923  |
| Tc00.1047053506495.20  | <i>T. cruzi</i> | 49  | 875  | 923  |
| Tc00.1047053506495.40  | <i>T. cruzi</i> | 991 | 35   | 1025 |
| Tc00.1047053506495.50  | <i>T. cruzi</i> | 272 | 34   | 305  |
| Tc00.1047053506499.100 | <i>T. cruzi</i> | 122 | 50   | 171  |
| Tc00.1047053506499.110 | <i>T. cruzi</i> | 96  | 21   | 116  |
| Tc00.1047053506499.110 | <i>T. cruzi</i> | 70  | 134  | 203  |
| Tc00.1047053506499.120 | <i>T. cruzi</i> | 50  | 12   | 61   |
| Tc00.1047053506499.120 | <i>T. cruzi</i> | 53  | 130  | 182  |
| Tc00.1047053506499.120 | <i>T. cruzi</i> | 53  | 130  | 182  |
| Tc00.1047053506499.130 | <i>T. cruzi</i> | 77  | 26   | 102  |
| Tc00.1047053506499.130 | <i>T. cruzi</i> | 75  | 111  | 185  |
| Tc00.1047053506499.140 | <i>T. cruzi</i> | 427 | 27   | 453  |
| Tc00.1047053506499.149 | <i>T. cruzi</i> | 138 | 33   | 170  |
| Tc00.1047053506499.160 | <i>T. cruzi</i> | 314 | 23   | 336  |
| Tc00.1047053506499.170 | <i>T. cruzi</i> | 94  | 1    | 94   |
| Tc00.1047053506499.170 | <i>T. cruzi</i> | 52  | 132  | 183  |
| Tc00.1047053506499.170 | <i>T. cruzi</i> | 59  | 290  | 348  |
| Tc00.1047053506499.170 | <i>T. cruzi</i> | 44  | 421  | 464  |
| Tc00.1047053506499.180 | <i>T. cruzi</i> | 127 | 3    | 129  |
| Tc00.1047053506499.190 | <i>T. cruzi</i> | 256 | 308  | 563  |
| Tc00.1047053506499.200 | <i>T. cruzi</i> | 167 | 1    | 167  |
| Tc00.1047053506499.200 | <i>T. cruzi</i> | 104 | 180  | 283  |

|                        |                 |     |      |      |
|------------------------|-----------------|-----|------|------|
| Tc00.1047053506499.210 | <i>T. cruzi</i> | 388 | 69   | 456  |
| Tc00.1047053506499.220 | <i>T. cruzi</i> | 265 | 106  | 370  |
| Tc00.1047053506499.230 | <i>T. cruzi</i> | 47  | 70   | 116  |
| Tc00.1047053506499.40  | <i>T. cruzi</i> | 348 | 70   | 417  |
| Tc00.1047053506499.70  | <i>T. cruzi</i> | 177 | 27   | 203  |
| Tc00.1047053506499.80  | <i>T. cruzi</i> | 233 | 29   | 261  |
| Tc00.1047053506499.90  | <i>T. cruzi</i> | 270 | 156  | 425  |
| Tc00.1047053506501.10  | <i>T. cruzi</i> | 417 | 29   | 445  |
| Tc00.1047053506501.100 | <i>T. cruzi</i> | 213 | 19   | 231  |
| Tc00.1047053506501.110 | <i>T. cruzi</i> | 193 | 53   | 245  |
| Tc00.1047053506501.120 | <i>T. cruzi</i> | 181 | 26   | 206  |
| Tc00.1047053506501.170 | <i>T. cruzi</i> | 168 | 19   | 186  |
| Tc00.1047053506501.190 | <i>T. cruzi</i> | 196 | 1    | 196  |
| Tc00.1047053506501.220 | <i>T. cruzi</i> | 320 | 26   | 345  |
| Tc00.1047053506501.230 | <i>T. cruzi</i> | 136 | 19   | 154  |
| Tc00.1047053506501.240 | <i>T. cruzi</i> | 178 | 74   | 251  |
| Tc00.1047053506501.280 | <i>T. cruzi</i> | 131 | 23   | 153  |
| Tc00.1047053506501.290 | <i>T. cruzi</i> | 287 | 48   | 334  |
| Tc00.1047053506501.350 | <i>T. cruzi</i> | 91  | 96   | 186  |
| Tc00.1047053506501.380 | <i>T. cruzi</i> | 224 | 27   | 250  |
| Tc00.1047053506501.390 | <i>T. cruzi</i> | 149 | 24   | 172  |
| Tc00.1047053506501.40  | <i>T. cruzi</i> | 191 | 20   | 210  |
| Tc00.1047053506501.70  | <i>T. cruzi</i> | 137 | 26   | 162  |
| Tc00.1047053506501.90  | <i>T. cruzi</i> | 91  | 42   | 132  |
| Tc00.1047053506503.10  | <i>T. cruzi</i> | 43  | 40   | 82   |
| Tc00.1047053506503.10  | <i>T. cruzi</i> | 42  | 349  | 390  |
| Tc00.1047053506503.10  | <i>T. cruzi</i> | 42  | 349  | 390  |
| Tc00.1047053506503.100 | <i>T. cruzi</i> | 121 | 1    | 121  |
| Tc00.1047053506503.100 | <i>T. cruzi</i> | 160 | 190  | 349  |
| Tc00.1047053506503.110 | <i>T. cruzi</i> | 82  | 38   | 119  |
| Tc00.1047053506503.120 | <i>T. cruzi</i> | 44  | 61   | 104  |
| Tc00.1047053506503.120 | <i>T. cruzi</i> | 258 | 1355 | 1612 |
| Tc00.1047053506503.120 | <i>T. cruzi</i> | 121 | 1693 | 1813 |
| Tc00.1047053506503.150 | <i>T. cruzi</i> | 58  | 1    | 58   |
| Tc00.1047053506503.160 | <i>T. cruzi</i> | 50  | 139  | 188  |
| Tc00.1047053506503.160 | <i>T. cruzi</i> | 51  | 318  | 368  |
| Tc00.1047053506503.160 | <i>T. cruzi</i> | 51  | 318  | 368  |
| Tc00.1047053506503.30  | <i>T. cruzi</i> | 146 | 130  | 275  |
| Tc00.1047053506503.40  | <i>T. cruzi</i> | 48  | 51   | 98   |
| Tc00.1047053506503.40  | <i>T. cruzi</i> | 238 | 118  | 355  |
| Tc00.1047053506503.40  | <i>T. cruzi</i> | 99  | 375  | 473  |
| Tc00.1047053506503.50  | <i>T. cruzi</i> | 215 | 17   | 231  |
| Tc00.1047053506503.50  | <i>T. cruzi</i> | 44  | 263  | 306  |
| Tc00.1047053506503.53  | <i>T. cruzi</i> | 164 | 1    | 164  |
| Tc00.1047053506503.53  | <i>T. cruzi</i> | 48  | 352  | 399  |
| Tc00.1047053506503.56  | <i>T. cruzi</i> | 87  | 406  | 492  |
| Tc00.1047053506503.60  | <i>T. cruzi</i> | 100 | 365  | 464  |

|                        |                 |     |      |      |
|------------------------|-----------------|-----|------|------|
| Tc00.1047053506503.80  | <i>T. cruzi</i> | 42  | 1    | 42   |
| Tc00.1047053506503.80  | <i>T. cruzi</i> | 52  | 152  | 203  |
| Tc00.1047053506503.80  | <i>T. cruzi</i> | 148 | 461  | 608  |
| Tc00.1047053506503.80  | <i>T. cruzi</i> | 127 | 685  | 811  |
| Tc00.1047053506503.80  | <i>T. cruzi</i> | 63  | 845  | 907  |
| Tc00.1047053506503.80  | <i>T. cruzi</i> | 56  | 968  | 1023 |
| Tc00.1047053506503.80  | <i>T. cruzi</i> | 79  | 1079 | 1157 |
| Tc00.1047053506503.80  | <i>T. cruzi</i> | 129 | 1193 | 1321 |
| Tc00.1047053506503.80  | <i>T. cruzi</i> | 57  | 1506 | 1562 |
| Tc00.1047053506503.80  | <i>T. cruzi</i> | 85  | 1585 | 1669 |
| Tc00.1047053506503.90  | <i>T. cruzi</i> | 54  | 1    | 54   |
| Tc00.1047053506503.90  | <i>T. cruzi</i> | 63  | 120  | 182  |
| Tc00.1047053506503.90  | <i>T. cruzi</i> | 66  | 243  | 308  |
| Tc00.1047053506503.90  | <i>T. cruzi</i> | 127 | 610  | 736  |
| Tc00.1047053506503.90  | <i>T. cruzi</i> | 247 | 779  | 1025 |
| Tc00.1047053506503.90  | <i>T. cruzi</i> | 134 | 1037 | 1170 |
| Tc00.1047053506505.10  | <i>T. cruzi</i> | 125 | 1    | 125  |
| Tc00.1047053506505.10  | <i>T. cruzi</i> | 208 | 136  | 343  |
| Tc00.1047053506505.10  | <i>T. cruzi</i> | 68  | 379  | 446  |
| Tc00.1047053506505.10  | <i>T. cruzi</i> | 40  | 466  | 505  |
| Tc00.1047053506505.40  | <i>T. cruzi</i> | 135 | 1    | 135  |
| Tc00.1047053506505.40  | <i>T. cruzi</i> | 172 | 163  | 334  |
| Tc00.1047053506505.40  | <i>T. cruzi</i> | 113 | 536  | 648  |
| Tc00.1047053506505.40  | <i>T. cruzi</i> | 141 | 699  | 839  |
| Tc00.1047053506505.40  | <i>T. cruzi</i> | 40  | 1003 | 1042 |
| Tc00.1047053506513.120 | <i>T. cruzi</i> | 43  | 575  | 617  |
| Tc00.1047053506513.160 | <i>T. cruzi</i> | 46  | 1    | 46   |
| Tc00.1047053506513.160 | <i>T. cruzi</i> | 229 | 269  | 497  |
| Tc00.1047053506513.180 | <i>T. cruzi</i> | 519 | 60   | 578  |
| Tc00.1047053506513.190 | <i>T. cruzi</i> | 49  | 213  | 261  |
| Tc00.1047053506513.20  | <i>T. cruzi</i> | 78  | 215  | 292  |
| Tc00.1047053506513.24  | <i>T. cruzi</i> | 46  | 1    | 46   |
| Tc00.1047053506513.24  | <i>T. cruzi</i> | 63  | 105  | 167  |
| Tc00.1047053506513.24  | <i>T. cruzi</i> | 63  | 105  | 167  |
| Tc00.1047053506513.30  | <i>T. cruzi</i> | 51  | 212  | 262  |
| Tc00.1047053506513.40  | <i>T. cruzi</i> | 68  | 146  | 213  |
| Tc00.1047053506513.50  | <i>T. cruzi</i> | 78  | 468  | 545  |
| Tc00.1047053506513.80  | <i>T. cruzi</i> | 57  | 1    | 57   |
| Tc00.1047053506513.90  | <i>T. cruzi</i> | 66  | 1    | 66   |
| Tc00.1047053506513.90  | <i>T. cruzi</i> | 291 | 96   | 386  |
| Tc00.1047053506517.100 | <i>T. cruzi</i> | 78  | 1    | 78   |
| Tc00.1047053506517.100 | <i>T. cruzi</i> | 51  | 112  | 162  |
| Tc00.1047053506517.100 | <i>T. cruzi</i> | 45  | 247  | 291  |
| Tc00.1047053506517.100 | <i>T. cruzi</i> | 50  | 319  | 368  |
| Tc00.1047053506517.100 | <i>T. cruzi</i> | 40  | 801  | 840  |
| Tc00.1047053506517.100 | <i>T. cruzi</i> | 114 | 865  | 978  |
| Tc00.1047053506517.110 | <i>T. cruzi</i> | 53  | 1    | 53   |



|                        |                 |     |      |      |
|------------------------|-----------------|-----|------|------|
| Tc00.1047053506517.130 | <i>T. cruzi</i> | 411 | 21   | 431  |
| Tc00.1047053506517.130 | <i>T. cruzi</i> | 106 | 459  | 564  |
| Tc00.1047053506517.130 | <i>T. cruzi</i> | 109 | 609  | 717  |
| Tc00.1047053506517.14  | <i>T. cruzi</i> | 304 | 1    | 304  |
| Tc00.1047053506517.140 | <i>T. cruzi</i> | 55  | 185  | 239  |
| Tc00.1047053506517.140 | <i>T. cruzi</i> | 69  | 517  | 585  |
| Tc00.1047053506517.140 | <i>T. cruzi</i> | 81  | 639  | 719  |
| Tc00.1047053506517.140 | <i>T. cruzi</i> | 153 | 815  | 967  |
| Tc00.1047053506517.140 | <i>T. cruzi</i> | 42  | 1011 | 1052 |
| Tc00.1047053506517.140 | <i>T. cruzi</i> | 45  | 1103 | 1147 |
| Tc00.1047053506517.30  | <i>T. cruzi</i> | 192 | 1    | 192  |
| Tc00.1047053506517.30  | <i>T. cruzi</i> | 219 | 231  | 449  |
| Tc00.1047053506517.30  | <i>T. cruzi</i> | 189 | 466  | 654  |
| Tc00.1047053506517.40  | <i>T. cruzi</i> | 172 | 1    | 172  |
| Tc00.1047053506517.40  | <i>T. cruzi</i> | 77  | 176  | 252  |
| Tc00.1047053506517.50  | <i>T. cruzi</i> | 79  | 1    | 79   |
| Tc00.1047053506517.50  | <i>T. cruzi</i> | 190 | 114  | 303  |
| Tc00.1047053506517.50  | <i>T. cruzi</i> | 323 | 365  | 687  |
| Tc00.1047053506519.100 | <i>T. cruzi</i> | 47  | 129  | 175  |
| Tc00.1047053506519.110 | <i>T. cruzi</i> | 263 | 114  | 376  |
| Tc00.1047053506519.110 | <i>T. cruzi</i> | 148 | 393  | 540  |
| Tc00.1047053506519.120 | <i>T. cruzi</i> | 65  | 103  | 167  |
| Tc00.1047053506519.120 | <i>T. cruzi</i> | 44  | 272  | 315  |
| Tc00.1047053506519.120 | <i>T. cruzi</i> | 105 | 405  | 509  |
| Tc00.1047053506519.51  | <i>T. cruzi</i> | 44  | 610  | 653  |
| Tc00.1047053506519.60  | <i>T. cruzi</i> | 54  | 1    | 54   |
| Tc00.1047053506519.60  | <i>T. cruzi</i> | 131 | 70   | 200  |
| Tc00.1047053506519.60  | <i>T. cruzi</i> | 45  | 425  | 469  |
| Tc00.1047053506519.60  | <i>T. cruzi</i> | 116 | 574  | 689  |
| Tc00.1047053506519.80  | <i>T. cruzi</i> | 76  | 326  | 401  |
| Tc00.1047053506519.90  | <i>T. cruzi</i> | 41  | 76   | 116  |
| Tc00.1047053506519.90  | <i>T. cruzi</i> | 148 | 187  | 334  |
| Tc00.1047053506525.10  | <i>T. cruzi</i> | 121 | 1    | 121  |
| Tc00.1047053506525.10  | <i>T. cruzi</i> | 181 | 143  | 323  |
| Tc00.1047053506525.10  | <i>T. cruzi</i> | 151 | 353  | 503  |
| Tc00.1047053506525.120 | <i>T. cruzi</i> | 304 | 1    | 304  |
| Tc00.1047053506525.120 | <i>T. cruzi</i> | 93  | 361  | 453  |
| Tc00.1047053506525.120 | <i>T. cruzi</i> | 64  | 497  | 560  |
| Tc00.1047053506525.120 | <i>T. cruzi</i> | 40  | 716  | 755  |
| Tc00.1047053506525.140 | <i>T. cruzi</i> | 113 | 1    | 113  |
| Tc00.1047053506525.140 | <i>T. cruzi</i> | 81  | 158  | 238  |
| Tc00.1047053506525.140 | <i>T. cruzi</i> | 70  | 635  | 704  |
| Tc00.1047053506525.140 | <i>T. cruzi</i> | 176 | 782  | 957  |
| Tc00.1047053506525.140 | <i>T. cruzi</i> | 43  | 995  | 1037 |
| Tc00.1047053506525.20  | <i>T. cruzi</i> | 57  | 1    | 57   |
| Tc00.1047053506525.30  | <i>T. cruzi</i> | 81  | 24   | 104  |
| Tc00.1047053506525.30  | <i>T. cruzi</i> | 48  | 158  | 205  |

|                        |                 |     |      |      |
|------------------------|-----------------|-----|------|------|
| Tc00.1047053506525.30  | <i>T. cruzi</i> | 72  | 315  | 386  |
| Tc00.1047053506525.40  | <i>T. cruzi</i> | 223 | 21   | 243  |
| Tc00.1047053506525.50  | <i>T. cruzi</i> | 64  | 173  | 236  |
| Tc00.1047053506525.70  | <i>T. cruzi</i> | 62  | 87   | 148  |
| Tc00.1047053506525.70  | <i>T. cruzi</i> | 42  | 507  | 548  |
| Tc00.1047053506525.70  | <i>T. cruzi</i> | 43  | 641  | 683  |
| Tc00.1047053506525.70  | <i>T. cruzi</i> | 77  | 845  | 921  |
| Tc00.1047053506525.70  | <i>T. cruzi</i> | 65  | 1149 | 1213 |
| Tc00.1047053506525.80  | <i>T. cruzi</i> | 41  | 126  | 166  |
| Tc00.1047053506525.90  | <i>T. cruzi</i> | 60  | 114  | 173  |
| Tc00.1047053506527.4   | <i>T. cruzi</i> | 126 | 134  | 259  |
| Tc00.1047053506529.100 | <i>T. cruzi</i> | 76  | 1    | 76   |
| Tc00.1047053506529.100 | <i>T. cruzi</i> | 171 | 89   | 259  |
| Tc00.1047053506529.100 | <i>T. cruzi</i> | 151 | 308  | 458  |
| Tc00.1047053506529.100 | <i>T. cruzi</i> | 78  | 619  | 696  |
| Tc00.1047053506529.120 | <i>T. cruzi</i> | 126 | 69   | 194  |
| Tc00.1047053506529.120 | <i>T. cruzi</i> | 175 | 426  | 600  |
| Tc00.1047053506529.130 | <i>T. cruzi</i> | 212 | 342  | 553  |
| Tc00.1047053506529.130 | <i>T. cruzi</i> | 256 | 962  | 1217 |
| Tc00.1047053506529.130 | <i>T. cruzi</i> | 46  | 1275 | 1320 |
| Tc00.1047053506529.140 | <i>T. cruzi</i> | 164 | 190  | 353  |
| Tc00.1047053506529.150 | <i>T. cruzi</i> | 108 | 662  | 769  |
| Tc00.1047053506529.170 | <i>T. cruzi</i> | 75  | 27   | 101  |
| Tc00.1047053506529.170 | <i>T. cruzi</i> | 82  | 131  | 212  |
| Tc00.1047053506529.170 | <i>T. cruzi</i> | 97  | 288  | 384  |
| Tc00.1047053506529.170 | <i>T. cruzi</i> | 77  | 563  | 639  |
| Tc00.1047053506529.180 | <i>T. cruzi</i> | 129 | 1    | 129  |
| Tc00.1047053506529.180 | <i>T. cruzi</i> | 54  | 144  | 197  |
| Tc00.1047053506529.190 | <i>T. cruzi</i> | 79  | 149  | 227  |
| Tc00.1047053506529.190 | <i>T. cruzi</i> | 153 | 464  | 616  |
| Tc00.1047053506529.200 | <i>T. cruzi</i> | 97  | 161  | 257  |
| Tc00.1047053506529.200 | <i>T. cruzi</i> | 176 | 496  | 671  |
| Tc00.1047053506529.200 | <i>T. cruzi</i> | 176 | 496  | 671  |
| Tc00.1047053506529.220 | <i>T. cruzi</i> | 51  | 1    | 51   |
| Tc00.1047053506529.220 | <i>T. cruzi</i> | 118 | 129  | 246  |
| Tc00.1047053506529.220 | <i>T. cruzi</i> | 52  | 337  | 388  |
| Tc00.1047053506529.224 | <i>T. cruzi</i> | 43  | 399  | 441  |
| Tc00.1047053506529.230 | <i>T. cruzi</i> | 50  | 38   | 87   |
| Tc00.1047053506529.230 | <i>T. cruzi</i> | 289 | 101  | 389  |
| Tc00.1047053506529.250 | <i>T. cruzi</i> | 42  | 94   | 135  |
| Tc00.1047053506529.250 | <i>T. cruzi</i> | 357 | 165  | 521  |
| Tc00.1047053506529.250 | <i>T. cruzi</i> | 181 | 547  | 727  |
| Tc00.1047053506529.250 | <i>T. cruzi</i> | 122 | 850  | 971  |
| Tc00.1047053506529.260 | <i>T. cruzi</i> | 318 | 94   | 411  |
| Tc00.1047053506529.280 | <i>T. cruzi</i> | 406 | 1    | 406  |
| Tc00.1047053506529.290 | <i>T. cruzi</i> | 137 | 1    | 137  |
| Tc00.1047053506529.290 | <i>T. cruzi</i> | 45  | 260  | 304  |

|                        |                 |     |      |      |
|------------------------|-----------------|-----|------|------|
| Tc00.1047053506529.290 | <i>T. cruzi</i> | 90  | 530  | 619  |
| Tc00.1047053506529.290 | <i>T. cruzi</i> | 54  | 626  | 679  |
| Tc00.1047053506529.30  | <i>T. cruzi</i> | 49  | 38   | 86   |
| Tc00.1047053506529.30  | <i>T. cruzi</i> | 76  | 91   | 166  |
| Tc00.1047053506529.300 | <i>T. cruzi</i> | 90  | 219  | 308  |
| Tc00.1047053506529.300 | <i>T. cruzi</i> | 121 | 322  | 442  |
| Tc00.1047053506529.310 | <i>T. cruzi</i> | 77  | 1    | 77   |
| Tc00.1047053506529.310 | <i>T. cruzi</i> | 102 | 116  | 217  |
| Tc00.1047053506529.320 | <i>T. cruzi</i> | 66  | 186  | 251  |
| Tc00.1047053506529.320 | <i>T. cruzi</i> | 208 | 523  | 730  |
| Tc00.1047053506529.320 | <i>T. cruzi</i> | 208 | 523  | 730  |
| Tc00.1047053506529.324 | <i>T. cruzi</i> | 40  | 124  | 163  |
| Tc00.1047053506529.340 | <i>T. cruzi</i> | 102 | 178  | 279  |
| Tc00.1047053506529.370 | <i>T. cruzi</i> | 155 | 17   | 171  |
| Tc00.1047053506529.40  | <i>T. cruzi</i> | 73  | 1    | 73   |
| Tc00.1047053506529.40  | <i>T. cruzi</i> | 149 | 76   | 224  |
| Tc00.1047053506529.400 | <i>T. cruzi</i> | 509 | 92   | 600  |
| Tc00.1047053506529.410 | <i>T. cruzi</i> | 250 | 1    | 250  |
| Tc00.1047053506529.410 | <i>T. cruzi</i> | 76  | 399  | 474  |
| Tc00.1047053506529.440 | <i>T. cruzi</i> | 787 | 28   | 814  |
| Tc00.1047053506529.460 | <i>T. cruzi</i> | 117 | 108  | 224  |
| Tc00.1047053506529.460 | <i>T. cruzi</i> | 67  | 305  | 371  |
| Tc00.1047053506529.460 | <i>T. cruzi</i> | 48  | 652  | 699  |
| Tc00.1047053506529.470 | <i>T. cruzi</i> | 46  | 1    | 46   |
| Tc00.1047053506529.470 | <i>T. cruzi</i> | 82  | 465  | 546  |
| Tc00.1047053506529.480 | <i>T. cruzi</i> | 329 | 1    | 329  |
| Tc00.1047053506529.480 | <i>T. cruzi</i> | 254 | 355  | 608  |
| Tc00.1047053506529.480 | <i>T. cruzi</i> | 293 | 1368 | 1660 |
| Tc00.1047053506529.490 | <i>T. cruzi</i> | 47  | 1    | 47   |
| Tc00.1047053506529.490 | <i>T. cruzi</i> | 128 | 218  | 345  |
| Tc00.1047053506529.490 | <i>T. cruzi</i> | 71  | 626  | 696  |
| Tc00.1047053506529.490 | <i>T. cruzi</i> | 215 | 731  | 945  |
| Tc00.1047053506529.50  | <i>T. cruzi</i> | 57  | 62   | 118  |
| Tc00.1047053506529.500 | <i>T. cruzi</i> | 164 | 38   | 201  |
| Tc00.1047053506529.500 | <i>T. cruzi</i> | 269 | 262  | 530  |
| Tc00.1047053506529.500 | <i>T. cruzi</i> | 46  | 590  | 635  |
| Tc00.1047053506529.530 | <i>T. cruzi</i> | 79  | 17   | 95   |
| Tc00.1047053506529.541 | <i>T. cruzi</i> | 271 | 20   | 290  |
| Tc00.1047053506529.546 | <i>T. cruzi</i> | 187 | 1    | 187  |
| Tc00.1047053506529.590 | <i>T. cruzi</i> | 281 | 107  | 387  |
| Tc00.1047053506529.590 | <i>T. cruzi</i> | 191 | 473  | 663  |
| Tc00.1047053506529.590 | <i>T. cruzi</i> | 111 | 735  | 845  |
| Tc00.1047053506529.590 | <i>T. cruzi</i> | 40  | 896  | 935  |
| Tc00.1047053506529.595 | <i>T. cruzi</i> | 149 | 24   | 172  |
| Tc00.1047053506529.595 | <i>T. cruzi</i> | 95  | 254  | 348  |
| Tc00.1047053506529.595 | <i>T. cruzi</i> | 95  | 254  | 348  |
| Tc00.1047053506529.600 | <i>T. cruzi</i> | 101 | 1    | 101  |

|                        |                 |     |      |      |
|------------------------|-----------------|-----|------|------|
| Tc00.1047053506529.600 | <i>T. cruzi</i> | 122 | 108  | 229  |
| Tc00.1047053506529.600 | <i>T. cruzi</i> | 122 | 108  | 229  |
| Tc00.1047053506529.610 | <i>T. cruzi</i> | 132 | 1    | 132  |
| Tc00.1047053506529.610 | <i>T. cruzi</i> | 58  | 159  | 216  |
| Tc00.1047053506529.610 | <i>T. cruzi</i> | 182 | 223  | 404  |
| Tc00.1047053506529.620 | <i>T. cruzi</i> | 179 | 132  | 310  |
| Tc00.1047053506529.640 | <i>T. cruzi</i> | 109 | 1    | 109  |
| Tc00.1047053506529.640 | <i>T. cruzi</i> | 45  | 227  | 271  |
| Tc00.1047053506529.640 | <i>T. cruzi</i> | 60  | 347  | 406  |
| Tc00.1047053506529.640 | <i>T. cruzi</i> | 175 | 416  | 590  |
| Tc00.1047053506529.640 | <i>T. cruzi</i> | 64  | 595  | 658  |
| Tc00.1047053506529.650 | <i>T. cruzi</i> | 90  | 60   | 149  |
| Tc00.1047053506529.650 | <i>T. cruzi</i> | 82  | 282  | 363  |
| Tc00.1047053506529.660 | <i>T. cruzi</i> | 90  | 66   | 155  |
| Tc00.1047053506529.660 | <i>T. cruzi</i> | 59  | 239  | 297  |
| Tc00.1047053506529.660 | <i>T. cruzi</i> | 59  | 239  | 297  |
| Tc00.1047053506529.680 | <i>T. cruzi</i> | 52  | 1    | 52   |
| Tc00.1047053506529.70  | <i>T. cruzi</i> | 104 | 89   | 192  |
| Tc00.1047053506529.80  | <i>T. cruzi</i> | 48  | 1    | 48   |
| Tc00.1047053506529.80  | <i>T. cruzi</i> | 152 | 132  | 283  |
| Tc00.1047053506529.80  | <i>T. cruzi</i> | 147 | 482  | 628  |
| Tc00.1047053506529.90  | <i>T. cruzi</i> | 65  | 291  | 355  |
| Tc00.1047053506531.20  | <i>T. cruzi</i> | 797 | 1    | 797  |
| Tc00.1047053506531.30  | <i>T. cruzi</i> | 108 | 1    | 108  |
| Tc00.1047053506531.40  | <i>T. cruzi</i> | 149 | 35   | 183  |
| Tc00.1047053506531.40  | <i>T. cruzi</i> | 53  | 842  | 894  |
| Tc00.1047053506531.40  | <i>T. cruzi</i> | 63  | 1349 | 1411 |
| Tc00.1047053506531.40  | <i>T. cruzi</i> | 51  | 1467 | 1517 |
| Tc00.1047053506531.40  | <i>T. cruzi</i> | 50  | 1977 | 2026 |
| Tc00.1047053506531.40  | <i>T. cruzi</i> | 55  | 2028 | 2082 |
| Tc00.1047053506531.60  | <i>T. cruzi</i> | 153 | 78   | 230  |
| Tc00.1047053506531.9   | <i>T. cruzi</i> | 128 | 1    | 128  |
| Tc00.1047053506531.9   | <i>T. cruzi</i> | 86  | 207  | 292  |
| Tc00.1047053506531.9   | <i>T. cruzi</i> | 184 | 397  | 580  |
| Tc00.1047053506531.9   | <i>T. cruzi</i> | 47  | 585  | 631  |
| Tc00.1047053506533.106 | <i>T. cruzi</i> | 50  | 34   | 83   |
| Tc00.1047053506533.142 | <i>T. cruzi</i> | 92  | 30   | 121  |
| Tc00.1047053506533.34  | <i>T. cruzi</i> | 50  | 115  | 164  |
| Tc00.1047053506533.34  | <i>T. cruzi</i> | 80  | 184  | 263  |
| Tc00.1047053506533.34  | <i>T. cruzi</i> | 127 | 658  | 784  |
| Tc00.1047053506533.34  | <i>T. cruzi</i> | 46  | 1342 | 1387 |
| Tc00.1047053506533.34  | <i>T. cruzi</i> | 68  | 1651 | 1718 |
| Tc00.1047053506533.34  | <i>T. cruzi</i> | 69  | 2603 | 2671 |
| Tc00.1047053506533.34  | <i>T. cruzi</i> | 55  | 2917 | 2971 |
| Tc00.1047053506533.34  | <i>T. cruzi</i> | 58  | 3517 | 3574 |
| Tc00.1047053506533.34  | <i>T. cruzi</i> | 47  | 3728 | 3774 |
| Tc00.1047053506533.70  | <i>T. cruzi</i> | 61  | 50   | 110  |

|                        |                 |     |      |      |
|------------------------|-----------------|-----|------|------|
| Tc00.1047053506543.10  | <i>T. cruzi</i> | 99  | 44   | 142  |
| Tc00.1047053506543.10  | <i>T. cruzi</i> | 44  | 233  | 276  |
| Tc00.1047053506543.100 | <i>T. cruzi</i> | 63  | 1    | 63   |
| Tc00.1047053506543.100 | <i>T. cruzi</i> | 716 | 90   | 805  |
| Tc00.1047053506543.20  | <i>T. cruzi</i> | 202 | 31   | 232  |
| Tc00.1047053506543.20  | <i>T. cruzi</i> | 95  | 695  | 789  |
| Tc00.1047053506543.70  | <i>T. cruzi</i> | 76  | 145  | 220  |
| Tc00.1047053506543.90  | <i>T. cruzi</i> | 59  | 1    | 59   |
| Tc00.1047053506545.10  | <i>T. cruzi</i> | 112 | 59   | 170  |
| Tc00.1047053506545.5   | <i>T. cruzi</i> | 81  | 18   | 98   |
| Tc00.1047053506551.10  | <i>T. cruzi</i> | 44  | 574  | 617  |
| Tc00.1047053506553.20  | <i>T. cruzi</i> | 105 | 127  | 231  |
| Tc00.1047053506563.10  | <i>T. cruzi</i> | 67  | 1    | 67   |
| Tc00.1047053506563.10  | <i>T. cruzi</i> | 102 | 105  | 206  |
| Tc00.1047053506563.10  | <i>T. cruzi</i> | 53  | 483  | 535  |
| Tc00.1047053506563.100 | <i>T. cruzi</i> | 180 | 128  | 307  |
| Tc00.1047053506563.120 | <i>T. cruzi</i> | 45  | 1    | 45   |
| Tc00.1047053506563.130 | <i>T. cruzi</i> | 40  | 1    | 40   |
| Tc00.1047053506563.160 | <i>T. cruzi</i> | 45  | 1    | 45   |
| Tc00.1047053506563.160 | <i>T. cruzi</i> | 47  | 780  | 826  |
| Tc00.1047053506563.160 | <i>T. cruzi</i> | 56  | 1244 | 1299 |
| Tc00.1047053506563.190 | <i>T. cruzi</i> | 66  | 1    | 66   |
| Tc00.1047053506563.190 | <i>T. cruzi</i> | 53  | 678  | 730  |
| Tc00.1047053506563.190 | <i>T. cruzi</i> | 83  | 776  | 858  |
| Tc00.1047053506563.20  | <i>T. cruzi</i> | 47  | 152  | 198  |
| Tc00.1047053506563.200 | <i>T. cruzi</i> | 55  | 1    | 55   |
| Tc00.1047053506563.200 | <i>T. cruzi</i> | 68  | 662  | 729  |
| Tc00.1047053506563.200 | <i>T. cruzi</i> | 68  | 662  | 729  |
| Tc00.1047053506563.30  | <i>T. cruzi</i> | 47  | 488  | 534  |
| Tc00.1047053506563.4   | <i>T. cruzi</i> | 133 | 1    | 133  |
| Tc00.1047053506563.60  | <i>T. cruzi</i> | 70  | 1    | 70   |
| Tc00.1047053506563.90  | <i>T. cruzi</i> | 74  | 1    | 74   |
| Tc00.1047053506565.20  | <i>T. cruzi</i> | 65  | 1    | 65   |
| Tc00.1047053506565.20  | <i>T. cruzi</i> | 40  | 228  | 267  |
| Tc00.1047053506565.20  | <i>T. cruzi</i> | 40  | 228  | 267  |
| Tc00.1047053506567.10  | <i>T. cruzi</i> | 126 | 1    | 126  |
| Tc00.1047053506567.10  | <i>T. cruzi</i> | 48  | 151  | 198  |
| Tc00.1047053506567.110 | <i>T. cruzi</i> | 58  | 204  | 261  |
| Tc00.1047053506567.110 | <i>T. cruzi</i> | 334 | 263  | 596  |
| Tc00.1047053506567.130 | <i>T. cruzi</i> | 83  | 1    | 83   |
| Tc00.1047053506567.134 | <i>T. cruzi</i> | 50  | 369  | 418  |
| Tc00.1047053506567.134 | <i>T. cruzi</i> | 271 | 504  | 774  |
| Tc00.1047053506567.134 | <i>T. cruzi</i> | 42  | 811  | 852  |
| Tc00.1047053506567.34  | <i>T. cruzi</i> | 57  | 1    | 57   |
| Tc00.1047053506567.50  | <i>T. cruzi</i> | 157 | 1    | 157  |
| Tc00.1047053506567.50  | <i>T. cruzi</i> | 44  | 160  | 203  |
| Tc00.1047053506567.74  | <i>T. cruzi</i> | 64  | 1    | 64   |

|                        |                 |     |     |     |
|------------------------|-----------------|-----|-----|-----|
| Tc00.1047053506567.74  | <i>T. cruzi</i> | 50  | 88  | 137 |
| Tc00.1047053506567.80  | <i>T. cruzi</i> | 132 | 91  | 222 |
| Tc00.1047053506579.10  | <i>T. cruzi</i> | 81  | 620 | 700 |
| Tc00.1047053506579.100 | <i>T. cruzi</i> | 165 | 74  | 238 |
| Tc00.1047053506579.100 | <i>T. cruzi</i> | 85  | 262 | 346 |
| Tc00.1047053506579.100 | <i>T. cruzi</i> | 85  | 262 | 346 |
| Tc00.1047053506579.110 | <i>T. cruzi</i> | 41  | 537 | 577 |
| Tc00.1047053506579.110 | <i>T. cruzi</i> | 61  | 671 | 731 |
| Tc00.1047053506579.110 | <i>T. cruzi</i> | 61  | 671 | 731 |
| Tc00.1047053506579.20  | <i>T. cruzi</i> | 150 | 122 | 271 |
| Tc00.1047053506579.20  | <i>T. cruzi</i> | 44  | 273 | 316 |
| Tc00.1047053506579.40  | <i>T. cruzi</i> | 46  | 265 | 310 |
| Tc00.1047053506579.50  | <i>T. cruzi</i> | 60  | 231 | 290 |
| Tc00.1047053506579.50  | <i>T. cruzi</i> | 55  | 527 | 581 |
| Tc00.1047053506579.50  | <i>T. cruzi</i> | 55  | 527 | 581 |
| Tc00.1047053506579.60  | <i>T. cruzi</i> | 138 | 72  | 209 |
| Tc00.1047053506579.70  | <i>T. cruzi</i> | 61  | 54  | 114 |
| Tc00.1047053506579.70  | <i>T. cruzi</i> | 66  | 426 | 491 |
| Tc00.1047053506579.70  | <i>T. cruzi</i> | 66  | 426 | 491 |
| Tc00.1047053506579.90  | <i>T. cruzi</i> | 190 | 92  | 281 |
| Tc00.1047053506579.90  | <i>T. cruzi</i> | 57  | 301 | 357 |
| Tc00.1047053506579.90  | <i>T. cruzi</i> | 210 | 488 | 697 |
| Tc00.1047053506579.90  | <i>T. cruzi</i> | 105 | 742 | 846 |
| Tc00.1047053506591.10  | <i>T. cruzi</i> | 112 | 1   | 112 |
| Tc00.1047053506591.20  | <i>T. cruzi</i> | 45  | 455 | 499 |
| Tc00.1047053506591.30  | <i>T. cruzi</i> | 42  | 163 | 204 |
| Tc00.1047053506591.4   | <i>T. cruzi</i> | 43  | 106 | 148 |
| Tc00.1047053506591.69  | <i>T. cruzi</i> | 60  | 1   | 60  |
| Tc00.1047053506591.69  | <i>T. cruzi</i> | 69  | 226 | 294 |
| Tc00.1047053506591.69  | <i>T. cruzi</i> | 49  | 361 | 409 |
| Tc00.1047053506591.69  | <i>T. cruzi</i> | 95  | 413 | 507 |
| Tc00.1047053506591.90  | <i>T. cruzi</i> | 53  | 1   | 53  |
| Tc00.1047053506597.30  | <i>T. cruzi</i> | 141 | 27  | 167 |
| Tc00.1047053506597.33  | <i>T. cruzi</i> | 48  | 1   | 48  |
| Tc00.1047053506597.40  | <i>T. cruzi</i> | 54  | 1   | 54  |
| Tc00.1047053506597.40  | <i>T. cruzi</i> | 50  | 136 | 185 |
| Tc00.1047053506597.40  | <i>T. cruzi</i> | 54  | 298 | 351 |
| Tc00.1047053506597.9   | <i>T. cruzi</i> | 41  | 1   | 41  |
| Tc00.1047053506599.100 | <i>T. cruzi</i> | 201 | 25  | 225 |
| Tc00.1047053506599.150 | <i>T. cruzi</i> | 259 | 25  | 283 |
| Tc00.1047053506599.170 | <i>T. cruzi</i> | 380 | 34  | 413 |
| Tc00.1047053506599.189 | <i>T. cruzi</i> | 151 | 22  | 172 |
| Tc00.1047053506599.210 | <i>T. cruzi</i> | 225 | 26  | 250 |
| Tc00.1047053506599.224 | <i>T. cruzi</i> | 164 | 10  | 173 |
| Tc00.1047053506599.240 | <i>T. cruzi</i> | 417 | 24  | 440 |
| Tc00.1047053506599.270 | <i>T. cruzi</i> | 145 | 27  | 171 |
| Tc00.1047053506599.310 | <i>T. cruzi</i> | 320 | 56  | 375 |

|                        |                 |     |      |      |
|------------------------|-----------------|-----|------|------|
| Tc00.1047053506599.330 | <i>T. cruzi</i> | 356 | 50   | 405  |
| Tc00.1047053506599.350 | <i>T. cruzi</i> | 150 | 21   | 170  |
| Tc00.1047053506599.390 | <i>T. cruzi</i> | 381 | 32   | 412  |
| Tc00.1047053506599.420 | <i>T. cruzi</i> | 203 | 101  | 303  |
| Tc00.1047053506599.430 | <i>T. cruzi</i> | 150 | 25   | 174  |
| Tc00.1047053506599.50  | <i>T. cruzi</i> | 320 | 50   | 369  |
| Tc00.1047053506599.70  | <i>T. cruzi</i> | 146 | 25   | 170  |
| Tc00.1047053506599.80  | <i>T. cruzi</i> | 337 | 35   | 371  |
| Tc00.1047053506601.40  | <i>T. cruzi</i> | 378 | 31   | 408  |
| Tc00.1047053506603.40  | <i>T. cruzi</i> | 42  | 1    | 42   |
| Tc00.1047053506603.40  | <i>T. cruzi</i> | 53  | 131  | 183  |
| Tc00.1047053506603.40  | <i>T. cruzi</i> | 53  | 293  | 345  |
| Tc00.1047053506603.43  | <i>T. cruzi</i> | 97  | 1    | 97   |
| Tc00.1047053506603.43  | <i>T. cruzi</i> | 58  | 113  | 170  |
| Tc00.1047053506605.10  | <i>T. cruzi</i> | 151 | 857  | 1007 |
| Tc00.1047053506605.100 | <i>T. cruzi</i> | 46  | 40   | 85   |
| Tc00.1047053506605.100 | <i>T. cruzi</i> | 197 | 133  | 329  |
| Tc00.1047053506605.100 | <i>T. cruzi</i> | 176 | 518  | 693  |
| Tc00.1047053506605.100 | <i>T. cruzi</i> | 70  | 762  | 831  |
| Tc00.1047053506605.130 | <i>T. cruzi</i> | 59  | 34   | 92   |
| Tc00.1047053506605.130 | <i>T. cruzi</i> | 101 | 220  | 320  |
| Tc00.1047053506605.130 | <i>T. cruzi</i> | 101 | 220  | 320  |
| Tc00.1047053506605.139 | <i>T. cruzi</i> | 107 | 50   | 156  |
| Tc00.1047053506605.150 | <i>T. cruzi</i> | 58  | 74   | 131  |
| Tc00.1047053506605.160 | <i>T. cruzi</i> | 77  | 57   | 133  |
| Tc00.1047053506605.174 | <i>T. cruzi</i> | 325 | 44   | 368  |
| Tc00.1047053506605.174 | <i>T. cruzi</i> | 103 | 448  | 550  |
| Tc00.1047053506605.180 | <i>T. cruzi</i> | 46  | 1    | 46   |
| Tc00.1047053506605.180 | <i>T. cruzi</i> | 68  | 367  | 434  |
| Tc00.1047053506605.180 | <i>T. cruzi</i> | 68  | 367  | 434  |
| Tc00.1047053506605.190 | <i>T. cruzi</i> | 64  | 279  | 342  |
| Tc00.1047053506605.190 | <i>T. cruzi</i> | 40  | 539  | 578  |
| Tc00.1047053506605.190 | <i>T. cruzi</i> | 40  | 539  | 578  |
| Tc00.1047053506605.194 | <i>T. cruzi</i> | 255 | 116  | 370  |
| Tc00.1047053506605.220 | <i>T. cruzi</i> | 47  | 91   | 137  |
| Tc00.1047053506605.220 | <i>T. cruzi</i> | 48  | 481  | 528  |
| Tc00.1047053506605.220 | <i>T. cruzi</i> | 124 | 581  | 704  |
| Tc00.1047053506605.229 | <i>T. cruzi</i> | 60  | 77   | 136  |
| Tc00.1047053506605.30  | <i>T. cruzi</i> | 49  | 46   | 94   |
| Tc00.1047053506605.70  | <i>T. cruzi</i> | 65  | 152  | 216  |
| Tc00.1047053506605.70  | <i>T. cruzi</i> | 76  | 410  | 485  |
| Tc00.1047053506605.70  | <i>T. cruzi</i> | 41  | 1319 | 1359 |
| Tc00.1047053506605.70  | <i>T. cruzi</i> | 176 | 1391 | 1566 |
| Tc00.1047053506605.80  | <i>T. cruzi</i> | 46  | 1    | 46   |
| Tc00.1047053506605.80  | <i>T. cruzi</i> | 43  | 235  | 277  |
| Tc00.1047053506605.80  | <i>T. cruzi</i> | 44  | 455  | 498  |
| Tc00.1047053506605.90  | <i>T. cruzi</i> | 47  | 31   | 77   |

|                        |                 |     |      |      |
|------------------------|-----------------|-----|------|------|
| Tc00.1047053506605.90  | <i>T. cruzi</i> | 90  | 108  | 197  |
| Tc00.1047053506605.90  | <i>T. cruzi</i> | 153 | 199  | 351  |
| Tc00.1047053506609.30  | <i>T. cruzi</i> | 51  | 1    | 51   |
| Tc00.1047053506609.30  | <i>T. cruzi</i> | 55  | 127  | 181  |
| Tc00.1047053506609.30  | <i>T. cruzi</i> | 41  | 426  | 466  |
| Tc00.1047053506609.30  | <i>T. cruzi</i> | 47  | 732  | 778  |
| Tc00.1047053506609.50  | <i>T. cruzi</i> | 130 | 184  | 313  |
| Tc00.1047053506609.70  | <i>T. cruzi</i> | 339 | 30   | 368  |
| Tc00.1047053506609.80  | <i>T. cruzi</i> | 198 | 15   | 212  |
| Tc00.1047053506623.30  | <i>T. cruzi</i> | 171 | 44   | 214  |
| Tc00.1047053506625.100 | <i>T. cruzi</i> | 102 | 1    | 102  |
| Tc00.1047053506625.100 | <i>T. cruzi</i> | 254 | 156  | 409  |
| Tc00.1047053506625.110 | <i>T. cruzi</i> | 213 | 1    | 213  |
| Tc00.1047053506625.120 | <i>T. cruzi</i> | 112 | 4    | 115  |
| Tc00.1047053506625.120 | <i>T. cruzi</i> | 253 | 158  | 410  |
| Tc00.1047053506625.150 | <i>T. cruzi</i> | 95  | 24   | 118  |
| Tc00.1047053506625.150 | <i>T. cruzi</i> | 87  | 125  | 211  |
| Tc00.1047053506625.160 | <i>T. cruzi</i> | 55  | 213  | 267  |
| Tc00.1047053506625.180 | <i>T. cruzi</i> | 100 | 30   | 129  |
| Tc00.1047053506625.180 | <i>T. cruzi</i> | 97  | 192  | 288  |
| Tc00.1047053506625.180 | <i>T. cruzi</i> | 50  | 449  | 498  |
| Tc00.1047053506625.19  | <i>T. cruzi</i> | 53  | 221  | 273  |
| Tc00.1047053506625.190 | <i>T. cruzi</i> | 274 | 74   | 347  |
| Tc00.1047053506625.210 | <i>T. cruzi</i> | 46  | 75   | 120  |
| Tc00.1047053506625.220 | <i>T. cruzi</i> | 269 | 33   | 301  |
| Tc00.1047053506625.230 | <i>T. cruzi</i> | 142 | 56   | 197  |
| Tc00.1047053506625.240 | <i>T. cruzi</i> | 82  | 1    | 82   |
| Tc00.1047053506625.249 | <i>T. cruzi</i> | 53  | 60   | 112  |
| Tc00.1047053506625.249 | <i>T. cruzi</i> | 40  | 407  | 446  |
| Tc00.1047053506625.249 | <i>T. cruzi</i> | 45  | 496  | 540  |
| Tc00.1047053506625.60  | <i>T. cruzi</i> | 116 | 70   | 185  |
| Tc00.1047053506625.60  | <i>T. cruzi</i> | 180 | 1772 | 1951 |
| Tc00.1047053506625.70  | <i>T. cruzi</i> | 90  | 58   | 147  |
| Tc00.1047053506625.80  | <i>T. cruzi</i> | 53  | 461  | 513  |
| Tc00.1047053506625.80  | <i>T. cruzi</i> | 77  | 578  | 654  |
| Tc00.1047053506625.80  | <i>T. cruzi</i> | 77  | 578  | 654  |
| Tc00.1047053506631.20  | <i>T. cruzi</i> | 53  | 286  | 338  |
| Tc00.1047053506631.20  | <i>T. cruzi</i> | 55  | 377  | 431  |
| Tc00.1047053506631.20  | <i>T. cruzi</i> | 55  | 377  | 431  |
| Tc00.1047053506631.40  | <i>T. cruzi</i> | 42  | 46   | 87   |
| Tc00.1047053506631.40  | <i>T. cruzi</i> | 50  | 402  | 451  |
| Tc00.1047053506631.40  | <i>T. cruzi</i> | 182 | 512  | 693  |
| Tc00.1047053506631.40  | <i>T. cruzi</i> | 52  | 701  | 752  |
| Tc00.1047053506633.100 | <i>T. cruzi</i> | 129 | 76   | 204  |
| Tc00.1047053506633.20  | <i>T. cruzi</i> | 48  | 18   | 65   |
| Tc00.1047053506633.20  | <i>T. cruzi</i> | 77  | 197  | 273  |
| Tc00.1047053506633.20  | <i>T. cruzi</i> | 131 | 304  | 434  |



|                        |                 |     |      |      |
|------------------------|-----------------|-----|------|------|
| Tc00.1047053506633.20  | <i>T. cruzi</i> | 96  | 883  | 978  |
| Tc00.1047053506633.20  | <i>T. cruzi</i> | 40  | 1282 | 1321 |
| Tc00.1047053506633.20  | <i>T. cruzi</i> | 120 | 1359 | 1478 |
| Tc00.1047053506633.20  | <i>T. cruzi</i> | 69  | 1486 | 1554 |
| Tc00.1047053506633.90  | <i>T. cruzi</i> | 41  | 263  | 303  |
| Tc00.1047053506635.100 | <i>T. cruzi</i> | 111 | 56   | 166  |
| Tc00.1047053506635.100 | <i>T. cruzi</i> | 50  | 176  | 225  |
| Tc00.1047053506635.100 | <i>T. cruzi</i> | 59  | 713  | 771  |
| Tc00.1047053506635.104 | <i>T. cruzi</i> | 129 | 1    | 129  |
| Tc00.1047053506635.120 | <i>T. cruzi</i> | 101 | 467  | 567  |
| Tc00.1047053506635.120 | <i>T. cruzi</i> | 55  | 614  | 668  |
| Tc00.1047053506635.20  | <i>T. cruzi</i> | 156 | 571  | 726  |
| Tc00.1047053506635.20  | <i>T. cruzi</i> | 106 | 756  | 861  |
| Tc00.1047053506635.30  | <i>T. cruzi</i> | 105 | 1    | 105  |
| Tc00.1047053506635.30  | <i>T. cruzi</i> | 263 | 272  | 534  |
| Tc00.1047053506635.30  | <i>T. cruzi</i> | 120 | 569  | 688  |
| Tc00.1047053506635.30  | <i>T. cruzi</i> | 41  | 723  | 763  |
| Tc00.1047053506635.30  | <i>T. cruzi</i> | 86  | 1135 | 1220 |
| Tc00.1047053506635.40  | <i>T. cruzi</i> | 66  | 458  | 523  |
| Tc00.1047053506635.50  | <i>T. cruzi</i> | 58  | 361  | 418  |
| Tc00.1047053506635.50  | <i>T. cruzi</i> | 76  | 693  | 768  |
| Tc00.1047053506635.60  | <i>T. cruzi</i> | 43  | 98   | 140  |
| Tc00.1047053506635.70  | <i>T. cruzi</i> | 50  | 151  | 200  |
| Tc00.1047053506635.70  | <i>T. cruzi</i> | 70  | 290  | 359  |
| Tc00.1047053506635.70  | <i>T. cruzi</i> | 70  | 290  | 359  |
| Tc00.1047053506635.80  | <i>T. cruzi</i> | 42  | 122  | 163  |
| Tc00.1047053506637.110 | <i>T. cruzi</i> | 40  | 76   | 115  |
| Tc00.1047053506637.120 | <i>T. cruzi</i> | 77  | 116  | 192  |
| Tc00.1047053506637.30  | <i>T. cruzi</i> | 43  | 1    | 43   |
| Tc00.1047053506637.50  | <i>T. cruzi</i> | 41  | 1    | 41   |
| Tc00.1047053506637.50  | <i>T. cruzi</i> | 153 | 75   | 227  |
| Tc00.1047053506637.50  | <i>T. cruzi</i> | 401 | 293  | 693  |
| Tc00.1047053506637.50  | <i>T. cruzi</i> | 82  | 715  | 796  |
| Tc00.1047053506637.70  | <i>T. cruzi</i> | 71  | 1    | 71   |
| Tc00.1047053506637.70  | <i>T. cruzi</i> | 137 | 140  | 276  |
| Tc00.1047053506637.70  | <i>T. cruzi</i> | 132 | 351  | 482  |
| Tc00.1047053506637.80  | <i>T. cruzi</i> | 139 | 94   | 232  |
| Tc00.1047053506637.80  | <i>T. cruzi</i> | 50  | 318  | 367  |
| Tc00.1047053506637.90  | <i>T. cruzi</i> | 140 | 194  | 333  |
| Tc00.1047053506637.90  | <i>T. cruzi</i> | 70  | 361  | 430  |
| Tc00.1047053506637.90  | <i>T. cruzi</i> | 177 | 583  | 759  |
| Tc00.1047053506647.10  | <i>T. cruzi</i> | 231 | 1    | 231  |
| Tc00.1047053506647.10  | <i>T. cruzi</i> | 76  | 670  | 745  |
| Tc00.1047053506647.20  | <i>T. cruzi</i> | 63  | 1    | 63   |
| Tc00.1047053506647.20  | <i>T. cruzi</i> | 406 | 72   | 477  |
| Tc00.1047053506647.20  | <i>T. cruzi</i> | 387 | 575  | 961  |
| Tc00.1047053506647.20  | <i>T. cruzi</i> | 190 | 1000 | 1189 |

|                        |                 |     |      |      |
|------------------------|-----------------|-----|------|------|
| Tc00.1047053506649.10  | <i>T. cruzi</i> | 147 | 202  | 348  |
| Tc00.1047053506649.110 | <i>T. cruzi</i> | 46  | 14   | 59   |
| Tc00.1047053506649.20  | <i>T. cruzi</i> | 45  | 1    | 45   |
| Tc00.1047053506649.30  | <i>T. cruzi</i> | 138 | 71   | 208  |
| Tc00.1047053506649.30  | <i>T. cruzi</i> | 75  | 215  | 289  |
| Tc00.1047053506649.30  | <i>T. cruzi</i> | 176 | 335  | 510  |
| Tc00.1047053506649.4   | <i>T. cruzi</i> | 52  | 62   | 113  |
| Tc00.1047053506649.60  | <i>T. cruzi</i> | 304 | 28   | 331  |
| Tc00.1047053506649.80  | <i>T. cruzi</i> | 79  | 1    | 79   |
| Tc00.1047053506649.80  | <i>T. cruzi</i> | 67  | 259  | 325  |
| Tc00.1047053506649.90  | <i>T. cruzi</i> | 108 | 1198 | 1305 |
| Tc00.1047053506649.90  | <i>T. cruzi</i> | 99  | 1336 | 1434 |
| Tc00.1047053506649.90  | <i>T. cruzi</i> | 46  | 1438 | 1483 |
| Tc00.1047053506649.90  | <i>T. cruzi</i> | 79  | 1517 | 1595 |
| Tc00.1047053506649.90  | <i>T. cruzi</i> | 216 | 1601 | 1816 |
| Tc00.1047053506649.90  | <i>T. cruzi</i> | 135 | 1839 | 1973 |
| Tc00.1047053506649.90  | <i>T. cruzi</i> | 354 | 1987 | 2340 |
| Tc00.1047053506655.7   | <i>T. cruzi</i> | 67  | 1    | 67   |
| Tc00.1047053506657.20  | <i>T. cruzi</i> | 106 | 57   | 162  |
| Tc00.1047053506657.30  | <i>T. cruzi</i> | 53  | 41   | 93   |
| Tc00.1047053506657.70  | <i>T. cruzi</i> | 186 | 1    | 186  |
| Tc00.1047053506657.70  | <i>T. cruzi</i> | 55  | 743  | 797  |
| Tc00.1047053506657.70  | <i>T. cruzi</i> | 52  | 918  | 969  |
| Tc00.1047053506657.88  | <i>T. cruzi</i> | 221 | 1    | 221  |
| Tc00.1047053506659.10  | <i>T. cruzi</i> | 186 | 351  | 536  |
| Tc00.1047053506659.10  | <i>T. cruzi</i> | 45  | 574  | 618  |
| Tc00.1047053506659.10  | <i>T. cruzi</i> | 94  | 705  | 798  |
| Tc00.1047053506659.10  | <i>T. cruzi</i> | 43  | 873  | 915  |
| Tc00.1047053506659.20  | <i>T. cruzi</i> | 52  | 1    | 52   |
| Tc00.1047053506659.20  | <i>T. cruzi</i> | 47  | 268  | 314  |
| Tc00.1047053506659.20  | <i>T. cruzi</i> | 46  | 559  | 604  |
| Tc00.1047053506659.39  | <i>T. cruzi</i> | 347 | 1    | 347  |
| Tc00.1047053506661.110 | <i>T. cruzi</i> | 76  | 340  | 415  |
| Tc00.1047053506661.110 | <i>T. cruzi</i> | 51  | 840  | 890  |
| Tc00.1047053506661.120 | <i>T. cruzi</i> | 176 | 1    | 176  |
| Tc00.1047053506661.120 | <i>T. cruzi</i> | 56  | 297  | 352  |
| Tc00.1047053506661.140 | <i>T. cruzi</i> | 119 | 353  | 471  |
| Tc00.1047053506661.150 | <i>T. cruzi</i> | 93  | 1    | 93   |
| Tc00.1047053506661.40  | <i>T. cruzi</i> | 74  | 96   | 169  |
| Tc00.1047053506661.50  | <i>T. cruzi</i> | 69  | 223  | 291  |
| Tc00.1047053506661.50  | <i>T. cruzi</i> | 102 | 355  | 456  |
| Tc00.1047053506661.50  | <i>T. cruzi</i> | 69  | 497  | 565  |
| Tc00.1047053506661.50  | <i>T. cruzi</i> | 54  | 825  | 878  |
| Tc00.1047053506661.60  | <i>T. cruzi</i> | 141 | 71   | 211  |
| Tc00.1047053506661.60  | <i>T. cruzi</i> | 65  | 243  | 307  |
| Tc00.1047053506661.70  | <i>T. cruzi</i> | 66  | 34   | 99   |
| Tc00.1047053506661.70  | <i>T. cruzi</i> | 46  | 122  | 167  |

|                        |                 |     |      |      |
|------------------------|-----------------|-----|------|------|
| Tc00.1047053506661.70  | <i>T. cruzi</i> | 81  | 265  | 345  |
| Tc00.1047053506661.80  | <i>T. cruzi</i> | 50  | 343  | 392  |
| Tc00.1047053506661.90  | <i>T. cruzi</i> | 46  | 1    | 46   |
| Tc00.1047053506661.90  | <i>T. cruzi</i> | 53  | 482  | 534  |
| Tc00.1047053506661.90  | <i>T. cruzi</i> | 79  | 850  | 928  |
| Tc00.1047053506661.90  | <i>T. cruzi</i> | 127 | 1012 | 1138 |
| Tc00.1047053506661.90  | <i>T. cruzi</i> | 78  | 1273 | 1350 |
| Tc00.1047053506661.90  | <i>T. cruzi</i> | 41  | 1374 | 1414 |
| Tc00.1047053506667.10  | <i>T. cruzi</i> | 210 | 105  | 314  |
| Tc00.1047053506667.120 | <i>T. cruzi</i> | 387 | 69   | 455  |
| Tc00.1047053506667.140 | <i>T. cruzi</i> | 138 | 176  | 313  |
| Tc00.1047053506667.160 | <i>T. cruzi</i> | 95  | 1    | 95   |
| Tc00.1047053506667.160 | <i>T. cruzi</i> | 53  | 127  | 179  |
| Tc00.1047053506667.160 | <i>T. cruzi</i> | 46  | 302  | 347  |
| Tc00.1047053506667.160 | <i>T. cruzi</i> | 42  | 427  | 468  |
| Tc00.1047053506667.160 | <i>T. cruzi</i> | 47  | 733  | 779  |
| Tc00.1047053506667.170 | <i>T. cruzi</i> | 82  | 167  | 248  |
| Tc00.1047053506667.20  | <i>T. cruzi</i> | 115 | 1    | 115  |
| Tc00.1047053506667.30  | <i>T. cruzi</i> | 229 | 91   | 319  |
| Tc00.1047053506667.40  | <i>T. cruzi</i> | 246 | 24   | 269  |
| Tc00.1047053506667.70  | <i>T. cruzi</i> | 241 | 27   | 267  |
| Tc00.1047053506667.80  | <i>T. cruzi</i> | 250 | 26   | 275  |
| Tc00.1047053506667.90  | <i>T. cruzi</i> | 94  | 1    | 94   |
| Tc00.1047053506667.90  | <i>T. cruzi</i> | 60  | 130  | 189  |
| Tc00.1047053506667.90  | <i>T. cruzi</i> | 95  | 731  | 825  |
| Tc00.1047053506671.10  | <i>T. cruzi</i> | 316 | 25   | 340  |
| Tc00.1047053506671.70  | <i>T. cruzi</i> | 50  | 1619 | 1668 |
| Tc00.1047053506671.70  | <i>T. cruzi</i> | 77  | 2855 | 2931 |
| Tc00.1047053506671.70  | <i>T. cruzi</i> | 82  | 3405 | 3486 |
| Tc00.1047053506671.90  | <i>T. cruzi</i> | 347 | 79   | 425  |
| Tc00.1047053506673.20  | <i>T. cruzi</i> | 96  | 1    | 96   |
| Tc00.1047053506673.30  | <i>T. cruzi</i> | 133 | 1    | 133  |
| Tc00.1047053506673.40  | <i>T. cruzi</i> | 42  | 591  | 632  |
| Tc00.1047053506673.50  | <i>T. cruzi</i> | 88  | 242  | 329  |
| Tc00.1047053506673.50  | <i>T. cruzi</i> | 55  | 448  | 502  |
| Tc00.1047053506673.50  | <i>T. cruzi</i> | 78  | 535  | 612  |
| Tc00.1047053506673.60  | <i>T. cruzi</i> | 68  | 269  | 336  |
| Tc00.1047053506673.60  | <i>T. cruzi</i> | 208 | 696  | 903  |
| Tc00.1047053506673.69  | <i>T. cruzi</i> | 46  | 156  | 201  |
| Tc00.1047053506673.69  | <i>T. cruzi</i> | 60  | 365  | 424  |
| Tc00.1047053506673.69  | <i>T. cruzi</i> | 455 | 909  | 1363 |
| Tc00.1047053506677.10  | <i>T. cruzi</i> | 209 | 61   | 269  |
| Tc00.1047053506677.30  | <i>T. cruzi</i> | 168 | 84   | 251  |
| Tc00.1047053506683.110 | <i>T. cruzi</i> | 295 | 712  | 1006 |
| Tc00.1047053506683.180 | <i>T. cruzi</i> | 43  | 225  | 267  |
| Tc00.1047053506683.180 | <i>T. cruzi</i> | 50  | 1591 | 1640 |
| Tc00.1047053506683.180 | <i>T. cruzi</i> | 40  | 2395 | 2434 |

|                        |                 |     |      |      |
|------------------------|-----------------|-----|------|------|
| Tc00.1047053506683.180 | <i>T. cruzi</i> | 71  | 2824 | 2894 |
| Tc00.1047053506683.180 | <i>T. cruzi</i> | 66  | 3380 | 3445 |
| Tc00.1047053506683.190 | <i>T. cruzi</i> | 42  | 1    | 42   |
| Tc00.1047053506683.190 | <i>T. cruzi</i> | 53  | 83   | 135  |
| Tc00.1047053506683.190 | <i>T. cruzi</i> | 53  | 83   | 135  |
| Tc00.1047053506683.240 | <i>T. cruzi</i> | 42  | 1    | 42   |
| Tc00.1047053506683.240 | <i>T. cruzi</i> | 52  | 663  | 714  |
| Tc00.1047053506683.240 | <i>T. cruzi</i> | 52  | 663  | 714  |
| Tc00.1047053506683.30  | <i>T. cruzi</i> | 42  | 1    | 42   |
| Tc00.1047053506683.30  | <i>T. cruzi</i> | 145 | 69   | 213  |
| Tc00.1047053506683.30  | <i>T. cruzi</i> | 145 | 69   | 213  |
| Tc00.1047053506685.40  | <i>T. cruzi</i> | 143 | 1    | 143  |
| Tc00.1047053506685.50  | <i>T. cruzi</i> | 44  | 195  | 238  |
| Tc00.1047053506691.14  | <i>T. cruzi</i> | 55  | 662  | 716  |
| Tc00.1047053506691.30  | <i>T. cruzi</i> | 69  | 164  | 232  |
| Tc00.1047053506691.30  | <i>T. cruzi</i> | 94  | 338  | 431  |
| Tc00.1047053506691.30  | <i>T. cruzi</i> | 87  | 714  | 800  |
| Tc00.1047053506691.30  | <i>T. cruzi</i> | 71  | 1008 | 1078 |
| Tc00.1047053506691.30  | <i>T. cruzi</i> | 53  | 1724 | 1776 |
| Tc00.1047053506691.30  | <i>T. cruzi</i> | 49  | 1844 | 1892 |
| Tc00.1047053506691.50  | <i>T. cruzi</i> | 78  | 37   | 114  |
| Tc00.1047053506691.50  | <i>T. cruzi</i> | 100 | 454  | 553  |
| Tc00.1047053506691.50  | <i>T. cruzi</i> | 51  | 718  | 768  |
| Tc00.1047053506691.60  | <i>T. cruzi</i> | 42  | 1    | 42   |
| Tc00.1047053506691.60  | <i>T. cruzi</i> | 66  | 143  | 208  |
| Tc00.1047053506691.60  | <i>T. cruzi</i> | 66  | 143  | 208  |
| Tc00.1047053506691.70  | <i>T. cruzi</i> | 50  | 32   | 81   |
| Tc00.1047053506691.70  | <i>T. cruzi</i> | 52  | 133  | 184  |
| Tc00.1047053506693.10  | <i>T. cruzi</i> | 73  | 54   | 126  |
| Tc00.1047053506693.10  | <i>T. cruzi</i> | 57  | 161  | 217  |
| Tc00.1047053506693.10  | <i>T. cruzi</i> | 57  | 161  | 217  |
| Tc00.1047053506693.30  | <i>T. cruzi</i> | 143 | 1    | 143  |
| Tc00.1047053506693.7   | <i>T. cruzi</i> | 101 | 1    | 101  |
| Tc00.1047053506695.20  | <i>T. cruzi</i> | 51  | 260  | 310  |
| Tc00.1047053506697.10  | <i>T. cruzi</i> | 217 | 9    | 225  |
| Tc00.1047053506697.10  | <i>T. cruzi</i> | 81  | 268  | 348  |
| Tc00.1047053506697.20  | <i>T. cruzi</i> | 68  | 73   | 140  |
| Tc00.1047053506697.20  | <i>T. cruzi</i> | 68  | 146  | 213  |
| Tc00.1047053506697.20  | <i>T. cruzi</i> | 206 | 615  | 820  |
| Tc00.1047053506697.30  | <i>T. cruzi</i> | 143 | 301  | 443  |
| Tc00.1047053506697.40  | <i>T. cruzi</i> | 83  | 746  | 828  |
| Tc00.1047053506697.50  | <i>T. cruzi</i> | 41  | 45   | 85   |
| Tc00.1047053506697.60  | <i>T. cruzi</i> | 48  | 490  | 537  |
| Tc00.1047053506697.60  | <i>T. cruzi</i> | 89  | 647  | 735  |
| Tc00.1047053506697.60  | <i>T. cruzi</i> | 42  | 876  | 917  |
| Tc00.1047053506699.10  | <i>T. cruzi</i> | 232 | 67   | 298  |
| Tc00.1047053506699.9   | <i>T. cruzi</i> | 41  | 293  | 333  |

|                        |                 |     |      |      |
|------------------------|-----------------|-----|------|------|
| Tc00.1047053506713.30  | <i>T. cruzi</i> | 131 | 32   | 162  |
| Tc00.1047053506713.30  | <i>T. cruzi</i> | 51  | 455  | 505  |
| Tc00.1047053506713.30  | <i>T. cruzi</i> | 78  | 750  | 827  |
| Tc00.1047053506713.40  | <i>T. cruzi</i> | 45  | 142  | 186  |
| Tc00.1047053506713.80  | <i>T. cruzi</i> | 41  | 1    | 41   |
| Tc00.1047053506715.10  | <i>T. cruzi</i> | 148 | 304  | 451  |
| Tc00.1047053506715.40  | <i>T. cruzi</i> | 43  | 23   | 65   |
| Tc00.1047053506715.40  | <i>T. cruzi</i> | 117 | 113  | 229  |
| Tc00.1047053506715.40  | <i>T. cruzi</i> | 67  | 252  | 318  |
| Tc00.1047053506717.10  | <i>T. cruzi</i> | 50  | 21   | 70   |
| Tc00.1047053506717.10  | <i>T. cruzi</i> | 68  | 86   | 153  |
| Tc00.1047053506717.10  | <i>T. cruzi</i> | 68  | 86   | 153  |
| Tc00.1047053506717.20  | <i>T. cruzi</i> | 64  | 1217 | 1280 |
| Tc00.1047053506717.200 | <i>T. cruzi</i> | 41  | 1    | 41   |
| Tc00.1047053506717.200 | <i>T. cruzi</i> | 148 | 69   | 216  |
| Tc00.1047053506717.200 | <i>T. cruzi</i> | 148 | 69   | 216  |
| Tc00.1047053506717.240 | <i>T. cruzi</i> | 42  | 63   | 104  |
| Tc00.1047053506717.4   | <i>T. cruzi</i> | 193 | 1    | 193  |
| Tc00.1047053506717.4   | <i>T. cruzi</i> | 54  | 220  | 273  |
| Tc00.1047053506717.4   | <i>T. cruzi</i> | 131 | 275  | 405  |
| Tc00.1047053506717.80  | <i>T. cruzi</i> | 40  | 1    | 40   |
| Tc00.1047053506717.80  | <i>T. cruzi</i> | 291 | 725  | 1015 |
| Tc00.1047053506729.20  | <i>T. cruzi</i> | 76  | 1    | 76   |
| Tc00.1047053506729.40  | <i>T. cruzi</i> | 82  | 304  | 385  |
| Tc00.1047053506729.40  | <i>T. cruzi</i> | 50  | 676  | 725  |
| Tc00.1047053506729.50  | <i>T. cruzi</i> | 140 | 154  | 293  |
| Tc00.1047053506729.70  | <i>T. cruzi</i> | 254 | 1    | 254  |
| Tc00.1047053506729.70  | <i>T. cruzi</i> | 57  | 438  | 494  |
| Tc00.1047053506729.9   | <i>T. cruzi</i> | 49  | 1    | 49   |
| Tc00.1047053506729.90  | <i>T. cruzi</i> | 133 | 477  | 609  |
| Tc00.1047053506733.10  | <i>T. cruzi</i> | 310 | 1    | 310  |
| Tc00.1047053506733.10  | <i>T. cruzi</i> | 106 | 347  | 452  |
| Tc00.1047053506733.100 | <i>T. cruzi</i> | 115 | 56   | 170  |
| Tc00.1047053506733.100 | <i>T. cruzi</i> | 51  | 249  | 299  |
| Tc00.1047053506733.100 | <i>T. cruzi</i> | 43  | 340  | 382  |
| Tc00.1047053506733.120 | <i>T. cruzi</i> | 62  | 1    | 62   |
| Tc00.1047053506733.120 | <i>T. cruzi</i> | 113 | 76   | 188  |
| Tc00.1047053506733.120 | <i>T. cruzi</i> | 71  | 231  | 301  |
| Tc00.1047053506733.130 | <i>T. cruzi</i> | 65  | 1    | 65   |
| Tc00.1047053506733.130 | <i>T. cruzi</i> | 42  | 79   | 120  |
| Tc00.1047053506733.130 | <i>T. cruzi</i> | 45  | 455  | 499  |
| Tc00.1047053506733.140 | <i>T. cruzi</i> | 231 | 89   | 319  |
| Tc00.1047053506733.140 | <i>T. cruzi</i> | 382 | 401  | 782  |
| Tc00.1047053506733.20  | <i>T. cruzi</i> | 54  | 213  | 266  |
| Tc00.1047053506733.30  | <i>T. cruzi</i> | 64  | 54   | 117  |
| Tc00.1047053506733.30  | <i>T. cruzi</i> | 55  | 291  | 345  |
| Tc00.1047053506733.30  | <i>T. cruzi</i> | 55  | 291  | 345  |

|                        |                 |     |      |      |
|------------------------|-----------------|-----|------|------|
| Tc00.1047053506733.40  | <i>T. cruzi</i> | 64  | 1    | 64   |
| Tc00.1047053506733.40  | <i>T. cruzi</i> | 116 | 151  | 266  |
| Tc00.1047053506733.60  | <i>T. cruzi</i> | 60  | 440  | 499  |
| Tc00.1047053506733.60  | <i>T. cruzi</i> | 40  | 654  | 693  |
| Tc00.1047053506733.60  | <i>T. cruzi</i> | 40  | 654  | 693  |
| Tc00.1047053506733.80  | <i>T. cruzi</i> | 85  | 1    | 85   |
| Tc00.1047053506733.80  | <i>T. cruzi</i> | 124 | 183  | 306  |
| Tc00.1047053506733.80  | <i>T. cruzi</i> | 41  | 406  | 446  |
| Tc00.1047053506733.80  | <i>T. cruzi</i> | 134 | 588  | 721  |
| Tc00.1047053506733.80  | <i>T. cruzi</i> | 60  | 795  | 854  |
| Tc00.1047053506733.80  | <i>T. cruzi</i> | 169 | 934  | 1102 |
| Tc00.1047053506733.90  | <i>T. cruzi</i> | 92  | 213  | 304  |
| Tc00.1047053506733.90  | <i>T. cruzi</i> | 103 | 541  | 643  |
| Tc00.1047053506733.90  | <i>T. cruzi</i> | 103 | 541  | 643  |
| Tc00.1047053506735.10  | <i>T. cruzi</i> | 57  | 308  | 364  |
| Tc00.1047053506735.20  | <i>T. cruzi</i> | 210 | 94   | 303  |
| Tc00.1047053506735.30  | <i>T. cruzi</i> | 144 | 1    | 144  |
| Tc00.1047053506735.30  | <i>T. cruzi</i> | 84  | 208  | 291  |
| Tc00.1047053506735.30  | <i>T. cruzi</i> | 67  | 339  | 405  |
| Tc00.1047053506735.30  | <i>T. cruzi</i> | 61  | 426  | 486  |
| Tc00.1047053506735.40  | <i>T. cruzi</i> | 77  | 53   | 129  |
| Tc00.1047053506735.40  | <i>T. cruzi</i> | 84  | 278  | 361  |
| Tc00.1047053506735.40  | <i>T. cruzi</i> | 99  | 429  | 527  |
| Tc00.1047053506735.40  | <i>T. cruzi</i> | 40  | 616  | 655  |
| Tc00.1047053506735.50  | <i>T. cruzi</i> | 80  | 1    | 80   |
| Tc00.1047053506735.50  | <i>T. cruzi</i> | 64  | 129  | 192  |
| Tc00.1047053506735.50  | <i>T. cruzi</i> | 77  | 281  | 357  |
| Tc00.1047053506735.50  | <i>T. cruzi</i> | 120 | 377  | 496  |
| Tc00.1047053506735.50  | <i>T. cruzi</i> | 57  | 504  | 560  |
| Tc00.1047053506735.50  | <i>T. cruzi</i> | 78  | 602  | 679  |
| Tc00.1047053506735.50  | <i>T. cruzi</i> | 47  | 1095 | 1141 |
| Tc00.1047053506735.60  | <i>T. cruzi</i> | 57  | 1    | 57   |
| Tc00.1047053506735.60  | <i>T. cruzi</i> | 43  | 141  | 183  |
| Tc00.1047053506735.60  | <i>T. cruzi</i> | 43  | 141  | 183  |
| Tc00.1047053506735.70  | <i>T. cruzi</i> | 166 | 1    | 166  |
| Tc00.1047053506735.70  | <i>T. cruzi</i> | 58  | 172  | 229  |
| Tc00.1047053506735.70  | <i>T. cruzi</i> | 59  | 317  | 375  |
| Tc00.1047053506735.70  | <i>T. cruzi</i> | 52  | 470  | 521  |
| Tc00.1047053506735.70  | <i>T. cruzi</i> | 72  | 568  | 639  |
| Tc00.1047053506735.70  | <i>T. cruzi</i> | 122 | 651  | 772  |
| Tc00.1047053506735.70  | <i>T. cruzi</i> | 98  | 796  | 893  |
| Tc00.1047053506735.70  | <i>T. cruzi</i> | 90  | 896  | 985  |
| Tc00.1047053506735.70  | <i>T. cruzi</i> | 109 | 1005 | 1113 |
| Tc00.1047053506735.70  | <i>T. cruzi</i> | 80  | 1167 | 1246 |
| Tc00.1047053506735.70  | <i>T. cruzi</i> | 95  | 1527 | 1621 |
| Tc00.1047053506735.80  | <i>T. cruzi</i> | 289 | 73   | 361  |
| Tc00.1047053506737.114 | <i>T. cruzi</i> | 86  | 13   | 98   |

|                        |                 |     |     |      |
|------------------------|-----------------|-----|-----|------|
| Tc00.1047053506737.128 | <i>T. cruzi</i> | 117 | 11  | 127  |
| Tc00.1047053506737.140 | <i>T. cruzi</i> | 140 | 458 | 597  |
| Tc00.1047053506737.20  | <i>T. cruzi</i> | 47  | 177 | 223  |
| Tc00.1047053506737.20  | <i>T. cruzi</i> | 50  | 379 | 428  |
| Tc00.1047053506737.20  | <i>T. cruzi</i> | 50  | 379 | 428  |
| Tc00.1047053506737.40  | <i>T. cruzi</i> | 102 | 322 | 423  |
| Tc00.1047053506737.40  | <i>T. cruzi</i> | 68  | 729 | 796  |
| Tc00.1047053506737.40  | <i>T. cruzi</i> | 80  | 925 | 1004 |
| Tc00.1047053506737.50  | <i>T. cruzi</i> | 51  | 214 | 264  |
| Tc00.1047053506737.60  | <i>T. cruzi</i> | 121 | 21  | 141  |
| Tc00.1047053506737.70  | <i>T. cruzi</i> | 189 | 127 | 315  |
| Tc00.1047053506737.70  | <i>T. cruzi</i> | 98  | 525 | 622  |
| Tc00.1047053506737.90  | <i>T. cruzi</i> | 51  | 1   | 51   |
| Tc00.1047053506737.90  | <i>T. cruzi</i> | 61  | 110 | 170  |
| Tc00.1047053506737.90  | <i>T. cruzi</i> | 43  | 406 | 448  |
| Tc00.1047053506737.90  | <i>T. cruzi</i> | 167 | 707 | 873  |
| Tc00.1047053506739.10  | <i>T. cruzi</i> | 115 | 1   | 115  |
| Tc00.1047053506739.10  | <i>T. cruzi</i> | 43  | 260 | 302  |
| Tc00.1047053506739.10  | <i>T. cruzi</i> | 222 | 436 | 657  |
| Tc00.1047053506739.10  | <i>T. cruzi</i> | 44  | 844 | 887  |
| Tc00.1047053506739.110 | <i>T. cruzi</i> | 50  | 380 | 429  |
| Tc00.1047053506739.110 | <i>T. cruzi</i> | 143 | 436 | 578  |
| Tc00.1047053506739.120 | <i>T. cruzi</i> | 63  | 187 | 249  |
| Tc00.1047053506739.130 | <i>T. cruzi</i> | 40  | 1   | 40   |
| Tc00.1047053506739.140 | <i>T. cruzi</i> | 192 | 223 | 414  |
| Tc00.1047053506739.140 | <i>T. cruzi</i> | 120 | 456 | 575  |
| Tc00.1047053506739.150 | <i>T. cruzi</i> | 47  | 176 | 222  |
| Tc00.1047053506739.160 | <i>T. cruzi</i> | 92  | 1   | 92   |
| Tc00.1047053506739.180 | <i>T. cruzi</i> | 80  | 1   | 80   |
| Tc00.1047053506739.180 | <i>T. cruzi</i> | 69  | 97  | 165  |
| Tc00.1047053506739.180 | <i>T. cruzi</i> | 332 | 245 | 576  |
| Tc00.1047053506739.190 | <i>T. cruzi</i> | 267 | 1   | 267  |
| Tc00.1047053506739.190 | <i>T. cruzi</i> | 46  | 581 | 626  |
| Tc00.1047053506739.190 | <i>T. cruzi</i> | 45  | 634 | 678  |
| Tc00.1047053506739.20  | <i>T. cruzi</i> | 83  | 36  | 118  |
| Tc00.1047053506739.20  | <i>T. cruzi</i> | 180 | 246 | 425  |
| Tc00.1047053506739.20  | <i>T. cruzi</i> | 87  | 463 | 549  |
| Tc00.1047053506739.20  | <i>T. cruzi</i> | 43  | 572 | 614  |
| Tc00.1047053506739.200 | <i>T. cruzi</i> | 121 | 1   | 121  |
| Tc00.1047053506739.30  | <i>T. cruzi</i> | 74  | 153 | 226  |
| Tc00.1047053506739.30  | <i>T. cruzi</i> | 51  | 558 | 608  |
| Tc00.1047053506739.30  | <i>T. cruzi</i> | 51  | 558 | 608  |
| Tc00.1047053506739.40  | <i>T. cruzi</i> | 43  | 62  | 104  |
| Tc00.1047053506739.40  | <i>T. cruzi</i> | 102 | 203 | 304  |
| Tc00.1047053506739.70  | <i>T. cruzi</i> | 42  | 170 | 211  |
| Tc00.1047053506739.70  | <i>T. cruzi</i> | 55  | 307 | 361  |
| Tc00.1047053506739.70  | <i>T. cruzi</i> | 55  | 307 | 361  |

|                        |                 |     |      |      |
|------------------------|-----------------|-----|------|------|
| Tc00.1047053506739.90  | <i>T. cruzi</i> | 63  | 350  | 412  |
| Tc00.1047053506739.90  | <i>T. cruzi</i> | 206 | 556  | 761  |
| Tc00.1047053506739.99  | <i>T. cruzi</i> | 59  | 104  | 162  |
| Tc00.1047053506743.10  | <i>T. cruzi</i> | 70  | 142  | 211  |
| Tc00.1047053506743.100 | <i>T. cruzi</i> | 84  | 64   | 147  |
| Tc00.1047053506743.120 | <i>T. cruzi</i> | 43  | 1    | 43   |
| Tc00.1047053506743.120 | <i>T. cruzi</i> | 45  | 615  | 659  |
| Tc00.1047053506743.120 | <i>T. cruzi</i> | 45  | 615  | 659  |
| Tc00.1047053506743.140 | <i>T. cruzi</i> | 168 | 64   | 231  |
| Tc00.1047053506743.150 | <i>T. cruzi</i> | 62  | 76   | 137  |
| Tc00.1047053506743.160 | <i>T. cruzi</i> | 62  | 290  | 351  |
| Tc00.1047053506743.170 | <i>T. cruzi</i> | 46  | 66   | 111  |
| Tc00.1047053506743.180 | <i>T. cruzi</i> | 49  | 321  | 369  |
| Tc00.1047053506743.180 | <i>T. cruzi</i> | 169 | 415  | 583  |
| Tc00.1047053506743.180 | <i>T. cruzi</i> | 233 | 611  | 843  |
| Tc00.1047053506743.180 | <i>T. cruzi</i> | 51  | 939  | 989  |
| Tc00.1047053506743.190 | <i>T. cruzi</i> | 63  | 78   | 140  |
| Tc00.1047053506743.20  | <i>T. cruzi</i> | 70  | 36   | 105  |
| Tc00.1047053506743.210 | <i>T. cruzi</i> | 72  | 1    | 72   |
| Tc00.1047053506743.30  | <i>T. cruzi</i> | 56  | 246  | 301  |
| Tc00.1047053506743.4   | <i>T. cruzi</i> | 40  | 1    | 40   |
| Tc00.1047053506743.4   | <i>T. cruzi</i> | 48  | 114  | 161  |
| Tc00.1047053506743.4   | <i>T. cruzi</i> | 48  | 114  | 161  |
| Tc00.1047053506743.60  | <i>T. cruzi</i> | 64  | 190  | 253  |
| Tc00.1047053506743.60  | <i>T. cruzi</i> | 79  | 294  | 372  |
| Tc00.1047053506743.60  | <i>T. cruzi</i> | 41  | 632  | 672  |
| Tc00.1047053506743.60  | <i>T. cruzi</i> | 159 | 1345 | 1503 |
| Tc00.1047053506743.60  | <i>T. cruzi</i> | 41  | 1993 | 2033 |
| Tc00.1047053506743.60  | <i>T. cruzi</i> | 59  | 2219 | 2277 |
| Tc00.1047053506743.60  | <i>T. cruzi</i> | 42  | 2562 | 2603 |
| Tc00.1047053506743.60  | <i>T. cruzi</i> | 95  | 2685 | 2779 |
| Tc00.1047053506743.60  | <i>T. cruzi</i> | 80  | 2983 | 3062 |
| Tc00.1047053506743.60  | <i>T. cruzi</i> | 52  | 3073 | 3124 |
| Tc00.1047053506743.60  | <i>T. cruzi</i> | 51  | 3239 | 3289 |
| Tc00.1047053506743.60  | <i>T. cruzi</i> | 66  | 3692 | 3757 |
| Tc00.1047053506743.60  | <i>T. cruzi</i> | 54  | 3905 | 3958 |
| Tc00.1047053506743.69  | <i>T. cruzi</i> | 114 | 1    | 114  |
| Tc00.1047053506743.69  | <i>T. cruzi</i> | 60  | 128  | 187  |
| Tc00.1047053506743.90  | <i>T. cruzi</i> | 68  | 1    | 68   |
| Tc00.1047053506743.90  | <i>T. cruzi</i> | 47  | 244  | 290  |
| Tc00.1047053506743.90  | <i>T. cruzi</i> | 47  | 244  | 290  |
| Tc00.1047053506745.10  | <i>T. cruzi</i> | 50  | 1    | 50   |
| Tc00.1047053506745.10  | <i>T. cruzi</i> | 56  | 376  | 431  |
| Tc00.1047053506745.10  | <i>T. cruzi</i> | 103 | 462  | 564  |
| Tc00.1047053506745.30  | <i>T. cruzi</i> | 79  | 1    | 79   |
| Tc00.1047053506745.30  | <i>T. cruzi</i> | 69  | 100  | 168  |
| Tc00.1047053506749.10  | <i>T. cruzi</i> | 50  | 161  | 210  |



|                        |                 |     |      |      |
|------------------------|-----------------|-----|------|------|
| Tc00.1047053506749.10  | <i>T. cruzi</i> | 80  | 229  | 308  |
| Tc00.1047053506749.10  | <i>T. cruzi</i> | 40  | 1100 | 1139 |
| Tc00.1047053506749.10  | <i>T. cruzi</i> | 51  | 1296 | 1346 |
| Tc00.1047053506749.20  | <i>T. cruzi</i> | 60  | 1    | 60   |
| Tc00.1047053506753.100 | <i>T. cruzi</i> | 97  | 1    | 97   |
| Tc00.1047053506753.120 | <i>T. cruzi</i> | 43  | 1    | 43   |
| Tc00.1047053506753.120 | <i>T. cruzi</i> | 44  | 545  | 588  |
| Tc00.1047053506753.120 | <i>T. cruzi</i> | 44  | 545  | 588  |
| Tc00.1047053506753.160 | <i>T. cruzi</i> | 74  | 141  | 214  |
| Tc00.1047053506753.180 | <i>T. cruzi</i> | 129 | 1    | 129  |
| Tc00.1047053506753.190 | <i>T. cruzi</i> | 59  | 392  | 450  |
| Tc00.1047053506753.190 | <i>T. cruzi</i> | 44  | 491  | 534  |
| Tc00.1047053506753.200 | <i>T. cruzi</i> | 89  | 1    | 89   |
| Tc00.1047053506753.210 | <i>T. cruzi</i> | 95  | 1    | 95   |
| Tc00.1047053506753.220 | <i>T. cruzi</i> | 42  | 174  | 215  |
| Tc00.1047053506753.230 | <i>T. cruzi</i> | 66  | 39   | 104  |
| Tc00.1047053506753.230 | <i>T. cruzi</i> | 57  | 656  | 712  |
| Tc00.1047053506753.230 | <i>T. cruzi</i> | 57  | 656  | 712  |
| Tc00.1047053506753.240 | <i>T. cruzi</i> | 43  | 150  | 192  |
| Tc00.1047053506753.249 | <i>T. cruzi</i> | 40  | 74   | 113  |
| Tc00.1047053506753.50  | <i>T. cruzi</i> | 85  | 134  | 218  |
| Tc00.1047053506753.50  | <i>T. cruzi</i> | 128 | 352  | 479  |
| Tc00.1047053506753.50  | <i>T. cruzi</i> | 49  | 492  | 540  |
| Tc00.1047053506753.50  | <i>T. cruzi</i> | 166 | 588  | 753  |
| Tc00.1047053506753.90  | <i>T. cruzi</i> | 57  | 130  | 186  |
| Tc00.1047053506753.90  | <i>T. cruzi</i> | 52  | 233  | 284  |
| Tc00.1047053506753.90  | <i>T. cruzi</i> | 81  | 1169 | 1249 |
| Tc00.1047053506755.10  | <i>T. cruzi</i> | 40  | 145  | 184  |
| Tc00.1047053506755.100 | <i>T. cruzi</i> | 86  | 1    | 86   |
| Tc00.1047053506755.100 | <i>T. cruzi</i> | 128 | 131  | 258  |
| Tc00.1047053506755.110 | <i>T. cruzi</i> | 56  | 52   | 107  |
| Tc00.1047053506755.120 | <i>T. cruzi</i> | 81  | 119  | 199  |
| Tc00.1047053506755.120 | <i>T. cruzi</i> | 44  | 238  | 281  |
| Tc00.1047053506755.120 | <i>T. cruzi</i> | 79  | 336  | 414  |
| Tc00.1047053506755.120 | <i>T. cruzi</i> | 73  | 445  | 517  |
| Tc00.1047053506755.140 | <i>T. cruzi</i> | 62  | 615  | 676  |
| Tc00.1047053506755.140 | <i>T. cruzi</i> | 147 | 932  | 1078 |
| Tc00.1047053506755.140 | <i>T. cruzi</i> | 51  | 1896 | 1946 |
| Tc00.1047053506755.150 | <i>T. cruzi</i> | 52  | 220  | 271  |
| Tc00.1047053506755.160 | <i>T. cruzi</i> | 40  | 1    | 40   |
| Tc00.1047053506755.160 | <i>T. cruzi</i> | 105 | 66   | 170  |
| Tc00.1047053506755.160 | <i>T. cruzi</i> | 112 | 370  | 481  |
| Tc00.1047053506755.170 | <i>T. cruzi</i> | 50  | 323  | 372  |
| Tc00.1047053506755.170 | <i>T. cruzi</i> | 67  | 655  | 721  |
| Tc00.1047053506755.170 | <i>T. cruzi</i> | 67  | 655  | 721  |
| Tc00.1047053506755.180 | <i>T. cruzi</i> | 44  | 1    | 44   |
| Tc00.1047053506755.180 | <i>T. cruzi</i> | 62  | 134  | 195  |

|                        |                 |     |     |     |
|------------------------|-----------------|-----|-----|-----|
| Tc00.1047053506755.180 | <i>T. cruzi</i> | 71  | 278 | 348 |
| Tc00.1047053506755.190 | <i>T. cruzi</i> | 448 | 44  | 491 |
| Tc00.1047053506755.190 | <i>T. cruzi</i> | 83  | 513 | 595 |
| Tc00.1047053506755.20  | <i>T. cruzi</i> | 126 | 241 | 366 |
| Tc00.1047053506755.20  | <i>T. cruzi</i> | 54  | 539 | 592 |
| Tc00.1047053506755.20  | <i>T. cruzi</i> | 54  | 539 | 592 |
| Tc00.1047053506755.220 | <i>T. cruzi</i> | 112 | 123 | 234 |
| Tc00.1047053506755.220 | <i>T. cruzi</i> | 67  | 529 | 595 |
| Tc00.1047053506755.230 | <i>T. cruzi</i> | 212 | 78  | 289 |
| Tc00.1047053506755.260 | <i>T. cruzi</i> | 46  | 29  | 74  |
| Tc00.1047053506755.270 | <i>T. cruzi</i> | 282 | 1   | 282 |
| Tc00.1047053506755.279 | <i>T. cruzi</i> | 50  | 117 | 166 |
| Tc00.1047053506755.30  | <i>T. cruzi</i> | 41  | 103 | 143 |
| Tc00.1047053506755.40  | <i>T. cruzi</i> | 79  | 208 | 286 |
| Tc00.1047053506755.60  | <i>T. cruzi</i> | 49  | 95  | 143 |
| Tc00.1047053506755.70  | <i>T. cruzi</i> | 105 | 1   | 105 |
| Tc00.1047053506755.80  | <i>T. cruzi</i> | 105 | 21  | 125 |
| Tc00.1047053506755.80  | <i>T. cruzi</i> | 47  | 233 | 279 |
| Tc00.1047053506755.90  | <i>T. cruzi</i> | 71  | 1   | 71  |
| Tc00.1047053506755.90  | <i>T. cruzi</i> | 49  | 230 | 278 |
| Tc00.1047053506757.10  | <i>T. cruzi</i> | 96  | 1   | 96  |
| Tc00.1047053506757.120 | <i>T. cruzi</i> | 53  | 1   | 53  |
| Tc00.1047053506757.120 | <i>T. cruzi</i> | 42  | 135 | 176 |
| Tc00.1047053506757.120 | <i>T. cruzi</i> | 47  | 743 | 789 |
| Tc00.1047053506757.150 | <i>T. cruzi</i> | 246 | 27  | 272 |
| Tc00.1047053506757.20  | <i>T. cruzi</i> | 275 | 1   | 275 |
| Tc00.1047053506757.50  | <i>T. cruzi</i> | 84  | 111 | 194 |
| Tc00.1047053506757.60  | <i>T. cruzi</i> | 47  | 1   | 47  |
| Tc00.1047053506757.60  | <i>T. cruzi</i> | 44  | 129 | 172 |
| Tc00.1047053506757.60  | <i>T. cruzi</i> | 49  | 735 | 783 |
| Tc00.1047053506757.90  | <i>T. cruzi</i> | 48  | 1   | 48  |
| Tc00.1047053506757.90  | <i>T. cruzi</i> | 67  | 66  | 132 |
| Tc00.1047053506757.90  | <i>T. cruzi</i> | 155 | 658 | 812 |
| Tc00.1047053506759.140 | <i>T. cruzi</i> | 251 | 120 | 370 |
| Tc00.1047053506759.160 | <i>T. cruzi</i> | 146 | 28  | 173 |
| Tc00.1047053506759.170 | <i>T. cruzi</i> | 333 | 31  | 363 |
| Tc00.1047053506759.20  | <i>T. cruzi</i> | 227 | 28  | 254 |
| Tc00.1047053506759.210 | <i>T. cruzi</i> | 194 | 1   | 194 |
| Tc00.1047053506759.220 | <i>T. cruzi</i> | 442 | 31  | 472 |
| Tc00.1047053506759.230 | <i>T. cruzi</i> | 121 | 11  | 131 |
| Tc00.1047053506759.230 | <i>T. cruzi</i> | 87  | 140 | 226 |
| Tc00.1047053506759.40  | <i>T. cruzi</i> | 411 | 24  | 434 |
| Tc00.1047053506759.50  | <i>T. cruzi</i> | 105 | 1   | 105 |
| Tc00.1047053506759.70  | <i>T. cruzi</i> | 164 | 14  | 177 |
| Tc00.1047053506759.80  | <i>T. cruzi</i> | 248 | 30  | 277 |
| Tc00.1047053506761.11  | <i>T. cruzi</i> | 46  | 73  | 118 |
| Tc00.1047053506761.19  | <i>T. cruzi</i> | 145 | 19  | 163 |

|                        |                 |     |     |      |
|------------------------|-----------------|-----|-----|------|
| Tc00.1047053506761.47  | <i>T. cruzi</i> | 145 | 22  | 166  |
| Tc00.1047053506763.110 | <i>T. cruzi</i> | 43  | 1   | 43   |
| Tc00.1047053506763.110 | <i>T. cruzi</i> | 274 | 736 | 1009 |
| Tc00.1047053506763.130 | <i>T. cruzi</i> | 449 | 53  | 501  |
| Tc00.1047053506763.150 | <i>T. cruzi</i> | 420 | 27  | 446  |
| Tc00.1047053506763.190 | <i>T. cruzi</i> | 147 | 24  | 170  |
| Tc00.1047053506763.210 | <i>T. cruzi</i> | 60  | 13  | 72   |
| Tc00.1047053506763.210 | <i>T. cruzi</i> | 41  | 142 | 182  |
| Tc00.1047053506763.210 | <i>T. cruzi</i> | 41  | 142 | 182  |
| Tc00.1047053506763.260 | <i>T. cruzi</i> | 430 | 48  | 477  |
| Tc00.1047053506763.280 | <i>T. cruzi</i> | 387 | 74  | 460  |
| Tc00.1047053506763.290 | <i>T. cruzi</i> | 168 | 20  | 187  |
| Tc00.1047053506763.30  | <i>T. cruzi</i> | 208 | 32  | 239  |
| Tc00.1047053506763.330 | <i>T. cruzi</i> | 233 | 31  | 263  |
| Tc00.1047053506763.340 | <i>T. cruzi</i> | 176 | 17  | 192  |
| Tc00.1047053506763.370 | <i>T. cruzi</i> | 48  | 100 | 147  |
| Tc00.1047053506763.40  | <i>T. cruzi</i> | 76  | 122 | 197  |
| Tc00.1047053506763.50  | <i>T. cruzi</i> | 255 | 25  | 279  |
| Tc00.1047053506763.80  | <i>T. cruzi</i> | 194 | 1   | 194  |
| Tc00.1047053506765.40  | <i>T. cruzi</i> | 41  | 1   | 41   |
| Tc00.1047053506765.40  | <i>T. cruzi</i> | 66  | 66  | 131  |
| Tc00.1047053506765.40  | <i>T. cruzi</i> | 152 | 657 | 808  |
| Tc00.1047053506765.49  | <i>T. cruzi</i> | 163 | 48  | 210  |
| Tc00.1047053506765.50  | <i>T. cruzi</i> | 86  | 112 | 197  |
| Tc00.1047053506765.74  | <i>T. cruzi</i> | 161 | 77  | 237  |
| Tc00.1047053506765.80  | <i>T. cruzi</i> | 161 | 1   | 161  |
| Tc00.1047053506767.110 | <i>T. cruzi</i> | 254 | 27  | 280  |
| Tc00.1047053506767.130 | <i>T. cruzi</i> | 157 | 26  | 182  |
| Tc00.1047053506767.140 | <i>T. cruzi</i> | 251 | 26  | 276  |
| Tc00.1047053506767.220 | <i>T. cruzi</i> | 158 | 25  | 182  |
| Tc00.1047053506767.230 | <i>T. cruzi</i> | 239 | 30  | 268  |
| Tc00.1047053506767.240 | <i>T. cruzi</i> | 86  | 112 | 197  |
| Tc00.1047053506767.324 | <i>T. cruzi</i> | 142 | 29  | 170  |
| Tc00.1047053506767.340 | <i>T. cruzi</i> | 355 | 70  | 424  |
| Tc00.1047053506767.360 | <i>T. cruzi</i> | 169 | 24  | 192  |
| Tc00.1047053506767.40  | <i>T. cruzi</i> | 172 | 76  | 247  |
| Tc00.1047053506767.400 | <i>T. cruzi</i> | 236 | 24  | 259  |
| Tc00.1047053506767.410 | <i>T. cruzi</i> | 43  | 1   | 43   |
| Tc00.1047053506767.410 | <i>T. cruzi</i> | 88  | 101 | 188  |
| Tc00.1047053506767.410 | <i>T. cruzi</i> | 88  | 101 | 188  |
| Tc00.1047053506767.50  | <i>T. cruzi</i> | 147 | 23  | 169  |
| Tc00.1047053506767.70  | <i>T. cruzi</i> | 279 | 28  | 306  |
| Tc00.1047053506767.80  | <i>T. cruzi</i> | 58  | 36  | 93   |
| Tc00.1047053506769.120 | <i>T. cruzi</i> | 213 | 25  | 237  |
| Tc00.1047053506769.20  | <i>T. cruzi</i> | 77  | 39  | 115  |
| Tc00.1047053506769.30  | <i>T. cruzi</i> | 419 | 27  | 445  |
| Tc00.1047053506769.40  | <i>T. cruzi</i> | 205 | 141 | 345  |

|                        |                 |     |      |      |
|------------------------|-----------------|-----|------|------|
| Tc00.1047053506769.50  | <i>T. cruzi</i> | 148 | 18   | 165  |
| Tc00.1047053506769.70  | <i>T. cruzi</i> | 147 | 23   | 169  |
| Tc00.1047053506769.80  | <i>T. cruzi</i> | 233 | 27   | 259  |
| Tc00.1047053506773.10  | <i>T. cruzi</i> | 144 | 53   | 196  |
| Tc00.1047053506773.10  | <i>T. cruzi</i> | 133 | 240  | 372  |
| Tc00.1047053506773.10  | <i>T. cruzi</i> | 66  | 526  | 591  |
| Tc00.1047053506773.100 | <i>T. cruzi</i> | 60  | 26   | 85   |
| Tc00.1047053506773.110 | <i>T. cruzi</i> | 60  | 231  | 290  |
| Tc00.1047053506773.130 | <i>T. cruzi</i> | 114 | 1    | 114  |
| Tc00.1047053506773.150 | <i>T. cruzi</i> | 117 | 506  | 622  |
| Tc00.1047053506773.160 | <i>T. cruzi</i> | 137 | 199  | 335  |
| Tc00.1047053506773.160 | <i>T. cruzi</i> | 217 | 366  | 582  |
| Tc00.1047053506773.170 | <i>T. cruzi</i> | 97  | 114  | 210  |
| Tc00.1047053506773.170 | <i>T. cruzi</i> | 61  | 443  | 503  |
| Tc00.1047053506773.170 | <i>T. cruzi</i> | 40  | 648  | 687  |
| Tc00.1047053506773.30  | <i>T. cruzi</i> | 187 | 61   | 247  |
| Tc00.1047053506773.30  | <i>T. cruzi</i> | 161 | 289  | 449  |
| Tc00.1047053506773.40  | <i>T. cruzi</i> | 55  | 33   | 87   |
| Tc00.1047053506773.40  | <i>T. cruzi</i> | 57  | 89   | 145  |
| Tc00.1047053506773.40  | <i>T. cruzi</i> | 57  | 89   | 145  |
| Tc00.1047053506773.70  | <i>T. cruzi</i> | 78  | 93   | 170  |
| Tc00.1047053506773.70  | <i>T. cruzi</i> | 46  | 756  | 801  |
| Tc00.1047053506773.70  | <i>T. cruzi</i> | 170 | 816  | 985  |
| Tc00.1047053506773.80  | <i>T. cruzi</i> | 41  | 1    | 41   |
| Tc00.1047053506775.100 | <i>T. cruzi</i> | 75  | 119  | 193  |
| Tc00.1047053506775.100 | <i>T. cruzi</i> | 62  | 227  | 288  |
| Tc00.1047053506775.100 | <i>T. cruzi</i> | 43  | 1009 | 1051 |
| Tc00.1047053506775.110 | <i>T. cruzi</i> | 60  | 130  | 189  |
| Tc00.1047053506775.130 | <i>T. cruzi</i> | 96  | 1    | 96   |
| Tc00.1047053506775.130 | <i>T. cruzi</i> | 59  | 237  | 295  |
| Tc00.1047053506775.130 | <i>T. cruzi</i> | 133 | 570  | 702  |
| Tc00.1047053506775.130 | <i>T. cruzi</i> | 68  | 714  | 781  |
| Tc00.1047053506775.130 | <i>T. cruzi</i> | 74  | 828  | 901  |
| Tc00.1047053506775.130 | <i>T. cruzi</i> | 42  | 1144 | 1185 |
| Tc00.1047053506775.130 | <i>T. cruzi</i> | 52  | 1569 | 1620 |
| Tc00.1047053506775.14  | <i>T. cruzi</i> | 100 | 1    | 100  |
| Tc00.1047053506775.14  | <i>T. cruzi</i> | 82  | 244  | 325  |
| Tc00.1047053506775.150 | <i>T. cruzi</i> | 53  | 1    | 53   |
| Tc00.1047053506775.150 | <i>T. cruzi</i> | 74  | 74   | 147  |
| Tc00.1047053506775.150 | <i>T. cruzi</i> | 124 | 187  | 310  |
| Tc00.1047053506775.150 | <i>T. cruzi</i> | 67  | 320  | 386  |
| Tc00.1047053506775.160 | <i>T. cruzi</i> | 80  | 79   | 158  |
| Tc00.1047053506775.170 | <i>T. cruzi</i> | 40  | 1    | 40   |
| Tc00.1047053506775.180 | <i>T. cruzi</i> | 53  | 37   | 89   |
| Tc00.1047053506775.190 | <i>T. cruzi</i> | 79  | 118  | 196  |
| Tc00.1047053506775.190 | <i>T. cruzi</i> | 62  | 479  | 540  |
| Tc00.1047053506775.190 | <i>T. cruzi</i> | 40  | 554  | 593  |

|                        |                 |     |      |      |
|------------------------|-----------------|-----|------|------|
| Tc00.1047053506775.22  | <i>T. cruzi</i> | 237 | 1    | 237  |
| Tc00.1047053506775.30  | <i>T. cruzi</i> | 204 | 66   | 269  |
| Tc00.1047053506775.30  | <i>T. cruzi</i> | 51  | 642  | 692  |
| Tc00.1047053506775.30  | <i>T. cruzi</i> | 225 | 740  | 964  |
| Tc00.1047053506775.40  | <i>T. cruzi</i> | 45  | 44   | 88   |
| Tc00.1047053506775.40  | <i>T. cruzi</i> | 76  | 95   | 170  |
| Tc00.1047053506775.40  | <i>T. cruzi</i> | 55  | 265  | 319  |
| Tc00.1047053506775.40  | <i>T. cruzi</i> | 46  | 326  | 371  |
| Tc00.1047053506775.50  | <i>T. cruzi</i> | 50  | 344  | 393  |
| Tc00.1047053506775.50  | <i>T. cruzi</i> | 49  | 436  | 484  |
| Tc00.1047053506775.50  | <i>T. cruzi</i> | 57  | 668  | 724  |
| Tc00.1047053506775.60  | <i>T. cruzi</i> | 396 | 1    | 396  |
| Tc00.1047053506775.60  | <i>T. cruzi</i> | 89  | 402  | 490  |
| Tc00.1047053506775.70  | <i>T. cruzi</i> | 51  | 59   | 109  |
| Tc00.1047053506775.90  | <i>T. cruzi</i> | 104 | 47   | 150  |
| Tc00.1047053506775.90  | <i>T. cruzi</i> | 40  | 894  | 933  |
| Tc00.1047053506777.100 | <i>T. cruzi</i> | 68  | 94   | 161  |
| Tc00.1047053506777.100 | <i>T. cruzi</i> | 55  | 227  | 281  |
| Tc00.1047053506777.100 | <i>T. cruzi</i> | 55  | 227  | 281  |
| Tc00.1047053506777.110 | <i>T. cruzi</i> | 66  | 9    | 74   |
| Tc00.1047053506777.110 | <i>T. cruzi</i> | 222 | 111  | 332  |
| Tc00.1047053506777.110 | <i>T. cruzi</i> | 676 | 356  | 1031 |
| Tc00.1047053506777.110 | <i>T. cruzi</i> | 138 | 1154 | 1291 |
| Tc00.1047053506777.24  | <i>T. cruzi</i> | 72  | 109  | 180  |
| Tc00.1047053506777.30  | <i>T. cruzi</i> | 71  | 138  | 208  |
| Tc00.1047053506777.40  | <i>T. cruzi</i> | 129 | 1    | 129  |
| Tc00.1047053506777.40  | <i>T. cruzi</i> | 222 | 191  | 412  |
| Tc00.1047053506777.40  | <i>T. cruzi</i> | 71  | 480  | 550  |
| Tc00.1047053506777.50  | <i>T. cruzi</i> | 52  | 47   | 98   |
| Tc00.1047053506777.50  | <i>T. cruzi</i> | 51  | 104  | 154  |
| Tc00.1047053506777.50  | <i>T. cruzi</i> | 51  | 104  | 154  |
| Tc00.1047053506777.80  | <i>T. cruzi</i> | 54  | 63   | 116  |
| Tc00.1047053506779.100 | <i>T. cruzi</i> | 146 | 1    | 146  |
| Tc00.1047053506779.110 | <i>T. cruzi</i> | 84  | 37   | 120  |
| Tc00.1047053506779.130 | <i>T. cruzi</i> | 55  | 1    | 55   |
| Tc00.1047053506779.130 | <i>T. cruzi</i> | 333 | 86   | 418  |
| Tc00.1047053506779.130 | <i>T. cruzi</i> | 63  | 446  | 508  |
| Tc00.1047053506779.140 | <i>T. cruzi</i> | 41  | 63   | 103  |
| Tc00.1047053506779.150 | <i>T. cruzi</i> | 48  | 1    | 48   |
| Tc00.1047053506779.180 | <i>T. cruzi</i> | 232 | 235  | 466  |
| Tc00.1047053506779.190 | <i>T. cruzi</i> | 128 | 953  | 1080 |
| Tc00.1047053506779.190 | <i>T. cruzi</i> | 110 | 1119 | 1228 |
| Tc00.1047053506795.10  | <i>T. cruzi</i> | 69  | 85   | 153  |
| Tc00.1047053506795.10  | <i>T. cruzi</i> | 131 | 187  | 317  |
| Tc00.1047053506795.10  | <i>T. cruzi</i> | 131 | 187  | 317  |
| Tc00.1047053506795.20  | <i>T. cruzi</i> | 90  | 34   | 123  |
| Tc00.1047053506795.20  | <i>T. cruzi</i> | 208 | 129  | 336  |

|                        |                 |     |     |     |
|------------------------|-----------------|-----|-----|-----|
| Tc00.1047053506795.20  | <i>T. cruzi</i> | 51  | 354 | 404 |
| Tc00.1047053506795.20  | <i>T. cruzi</i> | 69  | 408 | 476 |
| Tc00.1047053506795.20  | <i>T. cruzi</i> | 155 | 502 | 656 |
| Tc00.1047053506795.20  | <i>T. cruzi</i> | 52  | 777 | 828 |
| Tc00.1047053506795.40  | <i>T. cruzi</i> | 67  | 1   | 67  |
| Tc00.1047053506795.50  | <i>T. cruzi</i> | 52  | 429 | 480 |
| Tc00.1047053506795.50  | <i>T. cruzi</i> | 92  | 554 | 645 |
| Tc00.1047053506795.50  | <i>T. cruzi</i> | 92  | 554 | 645 |
| Tc00.1047053506795.60  | <i>T. cruzi</i> | 51  | 26  | 76  |
| Tc00.1047053506795.60  | <i>T. cruzi</i> | 73  | 150 | 222 |
| Tc00.1047053506795.60  | <i>T. cruzi</i> | 73  | 150 | 222 |
| Tc00.1047053506795.70  | <i>T. cruzi</i> | 118 | 79  | 196 |
| Tc00.1047053506795.90  | <i>T. cruzi</i> | 41  | 54  | 94  |
| Tc00.1047053506795.90  | <i>T. cruzi</i> | 44  | 118 | 161 |
| Tc00.1047053506795.90  | <i>T. cruzi</i> | 51  | 333 | 383 |
| Tc00.1047053506797.10  | <i>T. cruzi</i> | 84  | 237 | 320 |
| Tc00.1047053506797.10  | <i>T. cruzi</i> | 117 | 350 | 466 |
| Tc00.1047053506797.10  | <i>T. cruzi</i> | 66  | 833 | 898 |
| Tc00.1047053506797.120 | <i>T. cruzi</i> | 128 | 1   | 128 |
| Tc00.1047053506797.20  | <i>T. cruzi</i> | 365 | 53  | 417 |
| Tc00.1047053506797.20  | <i>T. cruzi</i> | 53  | 478 | 530 |
| Tc00.1047053506797.20  | <i>T. cruzi</i> | 163 | 545 | 707 |
| Tc00.1047053506797.30  | <i>T. cruzi</i> | 344 | 179 | 522 |
| Tc00.1047053506797.50  | <i>T. cruzi</i> | 240 | 1   | 240 |
| Tc00.1047053506797.50  | <i>T. cruzi</i> | 165 | 255 | 419 |
| Tc00.1047053506797.60  | <i>T. cruzi</i> | 44  | 135 | 178 |
| Tc00.1047053506797.80  | <i>T. cruzi</i> | 158 | 30  | 187 |
| Tc00.1047053506797.90  | <i>T. cruzi</i> | 41  | 445 | 485 |
| Tc00.1047053506799.10  | <i>T. cruzi</i> | 47  | 945 | 991 |
| Tc00.1047053506799.100 | <i>T. cruzi</i> | 178 | 210 | 387 |
| Tc00.1047053506799.110 | <i>T. cruzi</i> | 201 | 1   | 201 |
| Tc00.1047053506799.120 | <i>T. cruzi</i> | 126 | 70  | 195 |
| Tc00.1047053506799.130 | <i>T. cruzi</i> | 268 | 74  | 341 |
| Tc00.1047053506799.20  | <i>T. cruzi</i> | 162 | 187 | 348 |
| Tc00.1047053506799.30  | <i>T. cruzi</i> | 200 | 157 | 356 |
| Tc00.1047053506799.40  | <i>T. cruzi</i> | 132 | 65  | 196 |
| Tc00.1047053506799.50  | <i>T. cruzi</i> | 287 | 67  | 353 |
| Tc00.1047053506801.100 | <i>T. cruzi</i> | 47  | 66  | 112 |
| Tc00.1047053506801.100 | <i>T. cruzi</i> | 45  | 122 | 166 |
| Tc00.1047053506801.100 | <i>T. cruzi</i> | 45  | 122 | 166 |
| Tc00.1047053506801.110 | <i>T. cruzi</i> | 48  | 112 | 159 |
| Tc00.1047053506801.120 | <i>T. cruzi</i> | 41  | 56  | 96  |
| Tc00.1047053506801.120 | <i>T. cruzi</i> | 47  | 532 | 578 |
| Tc00.1047053506801.120 | <i>T. cruzi</i> | 43  | 893 | 935 |
| Tc00.1047053506801.129 | <i>T. cruzi</i> | 60  | 1   | 60  |
| Tc00.1047053506801.129 | <i>T. cruzi</i> | 70  | 115 | 184 |
| Tc00.1047053506801.129 | <i>T. cruzi</i> | 50  | 202 | 251 |

|                        |                 |      |     |      |
|------------------------|-----------------|------|-----|------|
| Tc00.1047053506801.129 | <i>T. cruzi</i> | 154  | 309 | 462  |
| Tc00.1047053506801.20  | <i>T. cruzi</i> | 157  | 318 | 474  |
| Tc00.1047053506801.30  | <i>T. cruzi</i> | 147  | 50  | 196  |
| Tc00.1047053506801.40  | <i>T. cruzi</i> | 300  | 57  | 356  |
| Tc00.1047053506801.60  | <i>T. cruzi</i> | 162  | 228 | 389  |
| Tc00.1047053506801.70  | <i>T. cruzi</i> | 156  | 837 | 992  |
| Tc00.1047053506811.100 | <i>T. cruzi</i> | 81   | 50  | 130  |
| Tc00.1047053506811.100 | <i>T. cruzi</i> | 121  | 168 | 288  |
| Tc00.1047053506811.100 | <i>T. cruzi</i> | 111  | 412 | 522  |
| Tc00.1047053506811.100 | <i>T. cruzi</i> | 45   | 533 | 577  |
| Tc00.1047053506811.110 | <i>T. cruzi</i> | 131  | 48  | 178  |
| Tc00.1047053506811.110 | <i>T. cruzi</i> | 155  | 408 | 562  |
| Tc00.1047053506811.120 | <i>T. cruzi</i> | 129  | 1   | 129  |
| Tc00.1047053506811.120 | <i>T. cruzi</i> | 60   | 186 | 245  |
| Tc00.1047053506811.140 | <i>T. cruzi</i> | 65   | 170 | 234  |
| Tc00.1047053506811.150 | <i>T. cruzi</i> | 56   | 107 | 162  |
| Tc00.1047053506811.150 | <i>T. cruzi</i> | 45   | 251 | 295  |
| Tc00.1047053506811.150 | <i>T. cruzi</i> | 42   | 304 | 345  |
| Tc00.1047053506811.160 | <i>T. cruzi</i> | 1138 | 1   | 1138 |
| Tc00.1047053506811.180 | <i>T. cruzi</i> | 149  | 1   | 149  |
| Tc00.1047053506811.180 | <i>T. cruzi</i> | 59   | 611 | 669  |
| Tc00.1047053506811.180 | <i>T. cruzi</i> | 92   | 964 | 1055 |
| Tc00.1047053506811.20  | <i>T. cruzi</i> | 79   | 108 | 186  |
| Tc00.1047053506811.200 | <i>T. cruzi</i> | 149  | 110 | 258  |
| Tc00.1047053506811.210 | <i>T. cruzi</i> | 90   | 139 | 228  |
| Tc00.1047053506811.220 | <i>T. cruzi</i> | 246  | 1   | 246  |
| Tc00.1047053506811.220 | <i>T. cruzi</i> | 56   | 262 | 317  |
| Tc00.1047053506811.220 | <i>T. cruzi</i> | 62   | 362 | 423  |
| Tc00.1047053506811.220 | <i>T. cruzi</i> | 56   | 495 | 550  |
| Tc00.1047053506811.220 | <i>T. cruzi</i> | 77   | 605 | 681  |
| Tc00.1047053506811.220 | <i>T. cruzi</i> | 176  | 759 | 934  |
| Tc00.1047053506811.40  | <i>T. cruzi</i> | 49   | 76  | 124  |
| Tc00.1047053506811.40  | <i>T. cruzi</i> | 139  | 180 | 318  |
| Tc00.1047053506811.40  | <i>T. cruzi</i> | 65   | 361 | 425  |
| Tc00.1047053506811.40  | <i>T. cruzi</i> | 48   | 532 | 579  |
| Tc00.1047053506811.40  | <i>T. cruzi</i> | 75   | 621 | 695  |
| Tc00.1047053506811.40  | <i>T. cruzi</i> | 45   | 881 | 925  |
| Tc00.1047053506811.40  | <i>T. cruzi</i> | 143  | 941 | 1083 |
| Tc00.1047053506811.50  | <i>T. cruzi</i> | 200  | 142 | 341  |
| Tc00.1047053506811.50  | <i>T. cruzi</i> | 90   | 691 | 780  |
| Tc00.1047053506811.70  | <i>T. cruzi</i> | 127  | 1   | 127  |
| Tc00.1047053506811.70  | <i>T. cruzi</i> | 41   | 193 | 233  |
| Tc00.1047053506811.70  | <i>T. cruzi</i> | 43   | 337 | 379  |
| Tc00.1047053506811.70  | <i>T. cruzi</i> | 61   | 427 | 487  |
| Tc00.1047053506811.70  | <i>T. cruzi</i> | 50   | 562 | 611  |
| Tc00.1047053506811.70  | <i>T. cruzi</i> | 50   | 688 | 737  |
| Tc00.1047053506811.80  | <i>T. cruzi</i> | 187  | 66  | 252  |

|                        |                 |     |      |      |
|------------------------|-----------------|-----|------|------|
| Tc00.1047053506811.90  | <i>T. cruzi</i> | 52  | 76   | 127  |
| Tc00.1047053506825.10  | <i>T. cruzi</i> | 59  | 112  | 170  |
| Tc00.1047053506825.10  | <i>T. cruzi</i> | 55  | 266  | 320  |
| Tc00.1047053506825.10  | <i>T. cruzi</i> | 48  | 403  | 450  |
| Tc00.1047053506825.100 | <i>T. cruzi</i> | 48  | 1    | 48   |
| Tc00.1047053506825.100 | <i>T. cruzi</i> | 52  | 144  | 195  |
| Tc00.1047053506825.100 | <i>T. cruzi</i> | 106 | 397  | 502  |
| Tc00.1047053506825.100 | <i>T. cruzi</i> | 56  | 554  | 609  |
| Tc00.1047053506825.100 | <i>T. cruzi</i> | 51  | 644  | 694  |
| Tc00.1047053506825.100 | <i>T. cruzi</i> | 89  | 838  | 926  |
| Tc00.1047053506825.120 | <i>T. cruzi</i> | 50  | 1    | 50   |
| Tc00.1047053506825.120 | <i>T. cruzi</i> | 55  | 231  | 285  |
| Tc00.1047053506825.120 | <i>T. cruzi</i> | 46  | 406  | 451  |
| Tc00.1047053506825.120 | <i>T. cruzi</i> | 83  | 678  | 760  |
| Tc00.1047053506825.120 | <i>T. cruzi</i> | 62  | 805  | 866  |
| Tc00.1047053506825.120 | <i>T. cruzi</i> | 49  | 1711 | 1759 |
| Tc00.1047053506825.120 | <i>T. cruzi</i> | 70  | 1778 | 1847 |
| Tc00.1047053506825.120 | <i>T. cruzi</i> | 150 | 1886 | 2035 |
| Tc00.1047053506825.130 | <i>T. cruzi</i> | 50  | 21   | 70   |
| Tc00.1047053506825.130 | <i>T. cruzi</i> | 77  | 97   | 173  |
| Tc00.1047053506825.130 | <i>T. cruzi</i> | 77  | 97   | 173  |
| Tc00.1047053506825.140 | <i>T. cruzi</i> | 61  | 1    | 61   |
| Tc00.1047053506825.150 | <i>T. cruzi</i> | 240 | 1    | 240  |
| Tc00.1047053506825.150 | <i>T. cruzi</i> | 211 | 245  | 455  |
| Tc00.1047053506825.150 | <i>T. cruzi</i> | 178 | 481  | 658  |
| Tc00.1047053506825.150 | <i>T. cruzi</i> | 48  | 685  | 732  |
| Tc00.1047053506825.160 | <i>T. cruzi</i> | 114 | 1    | 114  |
| Tc00.1047053506825.160 | <i>T. cruzi</i> | 219 | 116  | 334  |
| Tc00.1047053506825.170 | <i>T. cruzi</i> | 40  | 1    | 40   |
| Tc00.1047053506825.180 | <i>T. cruzi</i> | 92  | 273  | 364  |
| Tc00.1047053506825.180 | <i>T. cruzi</i> | 87  | 464  | 550  |
| Tc00.1047053506825.180 | <i>T. cruzi</i> | 117 | 652  | 768  |
| Tc00.1047053506825.180 | <i>T. cruzi</i> | 305 | 829  | 1133 |
| Tc00.1047053506825.180 | <i>T. cruzi</i> | 90  | 1294 | 1383 |
| Tc00.1047053506825.180 | <i>T. cruzi</i> | 85  | 1647 | 1731 |
| Tc00.1047053506825.190 | <i>T. cruzi</i> | 133 | 323  | 455  |
| Tc00.1047053506825.20  | <i>T. cruzi</i> | 103 | 1    | 103  |
| Tc00.1047053506825.20  | <i>T. cruzi</i> | 114 | 120  | 233  |
| Tc00.1047053506825.20  | <i>T. cruzi</i> | 45  | 261  | 305  |
| Tc00.1047053506825.20  | <i>T. cruzi</i> | 142 | 336  | 477  |
| Tc00.1047053506825.20  | <i>T. cruzi</i> | 299 | 527  | 825  |
| Tc00.1047053506825.20  | <i>T. cruzi</i> | 50  | 829  | 878  |
| Tc00.1047053506825.200 | <i>T. cruzi</i> | 127 | 157  | 283  |
| Tc00.1047053506825.200 | <i>T. cruzi</i> | 52  | 329  | 380  |
| Tc00.1047053506825.200 | <i>T. cruzi</i> | 76  | 506  | 581  |
| Tc00.1047053506825.219 | <i>T. cruzi</i> | 44  | 128  | 171  |
| Tc00.1047053506825.219 | <i>T. cruzi</i> | 82  | 207  | 288  |



|                        |                 |     |      |      |
|------------------------|-----------------|-----|------|------|
| Tc00.1047053506825.219 | <i>T. cruzi</i> | 77  | 473  | 549  |
| Tc00.1047053506825.219 | <i>T. cruzi</i> | 44  | 584  | 627  |
| Tc00.1047053506825.230 | <i>T. cruzi</i> | 41  | 395  | 435  |
| Tc00.1047053506825.230 | <i>T. cruzi</i> | 597 | 465  | 1061 |
| Tc00.1047053506825.230 | <i>T. cruzi</i> | 78  | 1073 | 1150 |
| Tc00.1047053506825.30  | <i>T. cruzi</i> | 87  | 1    | 87   |
| Tc00.1047053506825.30  | <i>T. cruzi</i> | 84  | 102  | 185  |
| Tc00.1047053506825.30  | <i>T. cruzi</i> | 81  | 241  | 321  |
| Tc00.1047053506825.30  | <i>T. cruzi</i> | 54  | 360  | 413  |
| Tc00.1047053506825.40  | <i>T. cruzi</i> | 56  | 59   | 114  |
| Tc00.1047053506825.40  | <i>T. cruzi</i> | 52  | 295  | 346  |
| Tc00.1047053506825.50  | <i>T. cruzi</i> | 114 | 16   | 129  |
| Tc00.1047053506825.50  | <i>T. cruzi</i> | 123 | 474  | 596  |
| Tc00.1047053506825.60  | <i>T. cruzi</i> | 162 | 492  | 653  |
| Tc00.1047053506825.60  | <i>T. cruzi</i> | 98  | 672  | 769  |
| Tc00.1047053506825.80  | <i>T. cruzi</i> | 132 | 95   | 226  |
| Tc00.1047053506825.80  | <i>T. cruzi</i> | 128 | 339  | 466  |
| Tc00.1047053506825.80  | <i>T. cruzi</i> | 40  | 523  | 562  |
| Tc00.1047053506825.80  | <i>T. cruzi</i> | 41  | 596  | 636  |
| Tc00.1047053506825.90  | <i>T. cruzi</i> | 414 | 144  | 557  |
| Tc00.1047053506829.110 | <i>T. cruzi</i> | 105 | 1    | 105  |
| Tc00.1047053506829.20  | <i>T. cruzi</i> | 61  | 1    | 61   |
| Tc00.1047053506829.20  | <i>T. cruzi</i> | 104 | 133  | 236  |
| Tc00.1047053506829.20  | <i>T. cruzi</i> | 53  | 291  | 343  |
| Tc00.1047053506829.20  | <i>T. cruzi</i> | 67  | 414  | 480  |
| Tc00.1047053506829.20  | <i>T. cruzi</i> | 41  | 497  | 537  |
| Tc00.1047053506829.39  | <i>T. cruzi</i> | 41  | 1    | 41   |
| Tc00.1047053506829.50  | <i>T. cruzi</i> | 65  | 410  | 474  |
| Tc00.1047053506829.50  | <i>T. cruzi</i> | 44  | 512  | 555  |
| Tc00.1047053506829.50  | <i>T. cruzi</i> | 44  | 512  | 555  |
| Tc00.1047053506829.60  | <i>T. cruzi</i> | 236 | 1    | 236  |
| Tc00.1047053506829.90  | <i>T. cruzi</i> | 413 | 1    | 413  |
| Tc00.1047053506829.90  | <i>T. cruzi</i> | 81  | 846  | 926  |
| Tc00.1047053506829.90  | <i>T. cruzi</i> | 230 | 1019 | 1248 |
| Tc00.1047053506829.90  | <i>T. cruzi</i> | 174 | 1274 | 1447 |
| Tc00.1047053506837.10  | <i>T. cruzi</i> | 93  | 17   | 109  |
| Tc00.1047053506847.70  | <i>T. cruzi</i> | 54  | 1    | 54   |
| Tc00.1047053506847.70  | <i>T. cruzi</i> | 198 | 127  | 324  |
| Tc00.1047053506847.70  | <i>T. cruzi</i> | 198 | 127  | 324  |
| Tc00.1047053506857.10  | <i>T. cruzi</i> | 44  | 1    | 44   |
| Tc00.1047053506857.10  | <i>T. cruzi</i> | 41  | 87   | 127  |
| Tc00.1047053506857.10  | <i>T. cruzi</i> | 62  | 425  | 486  |
| Tc00.1047053506857.110 | <i>T. cruzi</i> | 49  | 1    | 49   |
| Tc00.1047053506857.30  | <i>T. cruzi</i> | 260 | 1    | 260  |
| Tc00.1047053506857.30  | <i>T. cruzi</i> | 68  | 392  | 459  |
| Tc00.1047053506857.40  | <i>T. cruzi</i> | 53  | 241  | 293  |
| Tc00.1047053506857.40  | <i>T. cruzi</i> | 46  | 342  | 387  |

|                        |                 |     |      |      |
|------------------------|-----------------|-----|------|------|
| Tc00.1047053506857.40  | <i>T. cruzi</i> | 46  | 342  | 387  |
| Tc00.1047053506857.50  | <i>T. cruzi</i> | 41  | 211  | 251  |
| Tc00.1047053506857.50  | <i>T. cruzi</i> | 57  | 300  | 356  |
| Tc00.1047053506857.50  | <i>T. cruzi</i> | 57  | 300  | 356  |
| Tc00.1047053506857.60  | <i>T. cruzi</i> | 53  | 1    | 53   |
| Tc00.1047053506857.60  | <i>T. cruzi</i> | 115 | 137  | 251  |
| Tc00.1047053506857.60  | <i>T. cruzi</i> | 76  | 259  | 334  |
| Tc00.1047053506857.70  | <i>T. cruzi</i> | 124 | 218  | 341  |
| Tc00.1047053506857.70  | <i>T. cruzi</i> | 41  | 377  | 417  |
| Tc00.1047053506857.70  | <i>T. cruzi</i> | 67  | 522  | 588  |
| Tc00.1047053506857.80  | <i>T. cruzi</i> | 225 | 386  | 610  |
| Tc00.1047053506857.80  | <i>T. cruzi</i> | 64  | 663  | 726  |
| Tc00.1047053506857.80  | <i>T. cruzi</i> | 64  | 663  | 726  |
| Tc00.1047053506857.90  | <i>T. cruzi</i> | 48  | 308  | 355  |
| Tc00.1047053506859.10  | <i>T. cruzi</i> | 78  | 1    | 78   |
| Tc00.1047053506859.100 | <i>T. cruzi</i> | 42  | 83   | 124  |
| Tc00.1047053506859.110 | <i>T. cruzi</i> | 90  | 85   | 174  |
| Tc00.1047053506859.110 | <i>T. cruzi</i> | 105 | 192  | 296  |
| Tc00.1047053506859.120 | <i>T. cruzi</i> | 88  | 34   | 121  |
| Tc00.1047053506859.120 | <i>T. cruzi</i> | 118 | 298  | 415  |
| Tc00.1047053506859.120 | <i>T. cruzi</i> | 125 | 431  | 555  |
| Tc00.1047053506859.150 | <i>T. cruzi</i> | 74  | 273  | 346  |
| Tc00.1047053506859.150 | <i>T. cruzi</i> | 52  | 612  | 663  |
| Tc00.1047053506859.150 | <i>T. cruzi</i> | 50  | 1303 | 1352 |
| Tc00.1047053506859.160 | <i>T. cruzi</i> | 61  | 23   | 83   |
| Tc00.1047053506859.160 | <i>T. cruzi</i> | 135 | 445  | 579  |
| Tc00.1047053506859.160 | <i>T. cruzi</i> | 48  | 638  | 685  |
| Tc00.1047053506859.160 | <i>T. cruzi</i> | 50  | 718  | 767  |
| Tc00.1047053506859.170 | <i>T. cruzi</i> | 285 | 1    | 285  |
| Tc00.1047053506859.170 | <i>T. cruzi</i> | 147 | 290  | 436  |
| Tc00.1047053506859.170 | <i>T. cruzi</i> | 58  | 463  | 520  |
| Tc00.1047053506859.180 | <i>T. cruzi</i> | 116 | 1    | 116  |
| Tc00.1047053506859.180 | <i>T. cruzi</i> | 117 | 152  | 268  |
| Tc00.1047053506859.180 | <i>T. cruzi</i> | 51  | 300  | 350  |
| Tc00.1047053506859.20  | <i>T. cruzi</i> | 126 | 1    | 126  |
| Tc00.1047053506859.204 | <i>T. cruzi</i> | 53  | 207  | 259  |
| Tc00.1047053506859.204 | <i>T. cruzi</i> | 122 | 319  | 440  |
| Tc00.1047053506859.204 | <i>T. cruzi</i> | 122 | 319  | 440  |
| Tc00.1047053506859.230 | <i>T. cruzi</i> | 163 | 259  | 421  |
| Tc00.1047053506859.240 | <i>T. cruzi</i> | 44  | 51   | 94   |
| Tc00.1047053506859.240 | <i>T. cruzi</i> | 72  | 243  | 314  |
| Tc00.1047053506859.240 | <i>T. cruzi</i> | 157 | 337  | 493  |
| Tc00.1047053506859.30  | <i>T. cruzi</i> | 112 | 53   | 164  |
| Tc00.1047053506859.30  | <i>T. cruzi</i> | 69  | 232  | 300  |
| Tc00.1047053506859.30  | <i>T. cruzi</i> | 89  | 371  | 459  |
| Tc00.1047053506859.4   | <i>T. cruzi</i> | 74  | 135  | 208  |
| Tc00.1047053506859.49  | <i>T. cruzi</i> | 60  | 179  | 238  |

|                       |                 |     |      |      |
|-----------------------|-----------------|-----|------|------|
| Tc00.1047053506859.70 | <i>T. cruzi</i> | 45  | 90   | 134  |
| Tc00.1047053506859.80 | <i>T. cruzi</i> | 87  | 1    | 87   |
| Tc00.1047053506859.80 | <i>T. cruzi</i> | 118 | 133  | 250  |
| Tc00.1047053506859.80 | <i>T. cruzi</i> | 46  | 281  | 326  |
| Tc00.1047053506859.80 | <i>T. cruzi</i> | 52  | 334  | 385  |
| Tc00.1047053506859.80 | <i>T. cruzi</i> | 44  | 483  | 526  |
| Tc00.1047053506859.80 | <i>T. cruzi</i> | 124 | 558  | 681  |
| Tc00.1047053506859.90 | <i>T. cruzi</i> | 57  | 1    | 57   |
| Tc00.1047053506861.30 | <i>T. cruzi</i> | 55  | 126  | 180  |
| Tc00.1047053506863.20 | <i>T. cruzi</i> | 152 | 106  | 257  |
| Tc00.1047053506863.30 | <i>T. cruzi</i> | 47  | 1    | 47   |
| Tc00.1047053506863.30 | <i>T. cruzi</i> | 58  | 84   | 141  |
| Tc00.1047053506863.30 | <i>T. cruzi</i> | 58  | 84   | 141  |
| Tc00.1047053506863.40 | <i>T. cruzi</i> | 149 | 33   | 181  |
| Tc00.1047053506863.40 | <i>T. cruzi</i> | 124 | 191  | 314  |
| Tc00.1047053506863.60 | <i>T. cruzi</i> | 49  | 162  | 210  |
| Tc00.1047053506863.60 | <i>T. cruzi</i> | 112 | 217  | 328  |
| Tc00.1047053506863.60 | <i>T. cruzi</i> | 185 | 437  | 621  |
| Tc00.1047053506863.60 | <i>T. cruzi</i> | 47  | 637  | 683  |
| Tc00.1047053506863.70 | <i>T. cruzi</i> | 77  | 220  | 296  |
| Tc00.1047053506863.70 | <i>T. cruzi</i> | 59  | 561  | 619  |
| Tc00.1047053506863.70 | <i>T. cruzi</i> | 59  | 561  | 619  |
| Tc00.1047053506863.80 | <i>T. cruzi</i> | 174 | 1    | 174  |
| Tc00.1047053506863.80 | <i>T. cruzi</i> | 79  | 458  | 536  |
| Tc00.1047053506865.30 | <i>T. cruzi</i> | 90  | 1    | 90   |
| Tc00.1047053506865.30 | <i>T. cruzi</i> | 69  | 105  | 173  |
| Tc00.1047053506865.30 | <i>T. cruzi</i> | 193 | 229  | 421  |
| Tc00.1047053506865.30 | <i>T. cruzi</i> | 103 | 523  | 625  |
| Tc00.1047053506865.40 | <i>T. cruzi</i> | 57  | 22   | 78   |
| Tc00.1047053506865.40 | <i>T. cruzi</i> | 71  | 131  | 201  |
| Tc00.1047053506865.40 | <i>T. cruzi</i> | 51  | 220  | 270  |
| Tc00.1047053506865.60 | <i>T. cruzi</i> | 69  | 1    | 69   |
| Tc00.1047053506865.60 | <i>T. cruzi</i> | 129 | 351  | 479  |
| Tc00.1047053506865.60 | <i>T. cruzi</i> | 66  | 496  | 561  |
| Tc00.1047053506865.60 | <i>T. cruzi</i> | 60  | 749  | 808  |
| Tc00.1047053506865.70 | <i>T. cruzi</i> | 275 | 659  | 933  |
| Tc00.1047053506865.70 | <i>T. cruzi</i> | 129 | 1039 | 1167 |
| Tc00.1047053506865.70 | <i>T. cruzi</i> | 74  | 1204 | 1277 |
| Tc00.1047053506867.10 | <i>T. cruzi</i> | 47  | 27   | 73   |
| Tc00.1047053506867.10 | <i>T. cruzi</i> | 87  | 106  | 192  |
| Tc00.1047053506867.10 | <i>T. cruzi</i> | 67  | 389  | 455  |
| Tc00.1047053506867.30 | <i>T. cruzi</i> | 128 | 71   | 198  |
| Tc00.1047053506867.40 | <i>T. cruzi</i> | 40  | 528  | 567  |
| Tc00.1047053506869.10 | <i>T. cruzi</i> | 101 | 104  | 204  |
| Tc00.1047053506869.10 | <i>T. cruzi</i> | 97  | 266  | 362  |
| Tc00.1047053506869.10 | <i>T. cruzi</i> | 97  | 266  | 362  |
| Tc00.1047053506869.30 | <i>T. cruzi</i> | 60  | 65   | 124  |

|                        |                 |     |      |      |
|------------------------|-----------------|-----|------|------|
| Tc00.1047053506869.34  | <i>T. cruzi</i> | 51  | 104  | 154  |
| Tc00.1047053506869.54  | <i>T. cruzi</i> | 69  | 1    | 69   |
| Tc00.1047053506869.60  | <i>T. cruzi</i> | 51  | 43   | 93   |
| Tc00.1047053506869.60  | <i>T. cruzi</i> | 42  | 116  | 157  |
| Tc00.1047053506869.60  | <i>T. cruzi</i> | 41  | 564  | 604  |
| Tc00.1047053506885.10  | <i>T. cruzi</i> | 45  | 429  | 473  |
| Tc00.1047053506885.110 | <i>T. cruzi</i> | 46  | 15   | 60   |
| Tc00.1047053506885.120 | <i>T. cruzi</i> | 73  | 265  | 337  |
| Tc00.1047053506885.180 | <i>T. cruzi</i> | 155 | 1    | 155  |
| Tc00.1047053506885.20  | <i>T. cruzi</i> | 45  | 1    | 45   |
| Tc00.1047053506885.200 | <i>T. cruzi</i> | 78  | 1    | 78   |
| Tc00.1047053506885.200 | <i>T. cruzi</i> | 514 | 184  | 697  |
| Tc00.1047053506885.200 | <i>T. cruzi</i> | 88  | 761  | 848  |
| Tc00.1047053506885.200 | <i>T. cruzi</i> | 135 | 902  | 1036 |
| Tc00.1047053506885.204 | <i>T. cruzi</i> | 62  | 198  | 259  |
| Tc00.1047053506885.210 | <i>T. cruzi</i> | 47  | 1    | 47   |
| Tc00.1047053506885.210 | <i>T. cruzi</i> | 217 | 724  | 940  |
| Tc00.1047053506885.260 | <i>T. cruzi</i> | 46  | 34   | 79   |
| Tc00.1047053506885.260 | <i>T. cruzi</i> | 96  | 90   | 185  |
| Tc00.1047053506885.270 | <i>T. cruzi</i> | 42  | 70   | 111  |
| Tc00.1047053506885.270 | <i>T. cruzi</i> | 56  | 543  | 598  |
| Tc00.1047053506885.270 | <i>T. cruzi</i> | 56  | 543  | 598  |
| Tc00.1047053506885.290 | <i>T. cruzi</i> | 41  | 145  | 185  |
| Tc00.1047053506885.290 | <i>T. cruzi</i> | 84  | 676  | 759  |
| Tc00.1047053506885.290 | <i>T. cruzi</i> | 84  | 676  | 759  |
| Tc00.1047053506885.30  | <i>T. cruzi</i> | 47  | 96   | 142  |
| Tc00.1047053506885.300 | <i>T. cruzi</i> | 53  | 1    | 53   |
| Tc00.1047053506885.330 | <i>T. cruzi</i> | 380 | 33   | 412  |
| Tc00.1047053506885.330 | <i>T. cruzi</i> | 65  | 421  | 485  |
| Tc00.1047053506885.330 | <i>T. cruzi</i> | 200 | 501  | 700  |
| Tc00.1047053506885.330 | <i>T. cruzi</i> | 90  | 709  | 798  |
| Tc00.1047053506885.330 | <i>T. cruzi</i> | 99  | 814  | 912  |
| Tc00.1047053506885.330 | <i>T. cruzi</i> | 41  | 974  | 1014 |
| Tc00.1047053506885.340 | <i>T. cruzi</i> | 73  | 1    | 73   |
| Tc00.1047053506885.354 | <i>T. cruzi</i> | 115 | 108  | 222  |
| Tc00.1047053506885.360 | <i>T. cruzi</i> | 48  | 25   | 72   |
| Tc00.1047053506885.390 | <i>T. cruzi</i> | 121 | 1309 | 1429 |
| Tc00.1047053506885.394 | <i>T. cruzi</i> | 49  | 1    | 49   |
| Tc00.1047053506885.420 | <i>T. cruzi</i> | 195 | 1    | 195  |
| Tc00.1047053506885.440 | <i>T. cruzi</i> | 97  | 289  | 385  |
| Tc00.1047053506885.440 | <i>T. cruzi</i> | 81  | 546  | 626  |
| Tc00.1047053506885.440 | <i>T. cruzi</i> | 61  | 662  | 722  |
| Tc00.1047053506885.450 | <i>T. cruzi</i> | 53  | 1    | 53   |
| Tc00.1047053506885.480 | <i>T. cruzi</i> | 43  | 68   | 110  |
| Tc00.1047053506885.480 | <i>T. cruzi</i> | 41  | 474  | 514  |
| Tc00.1047053506885.480 | <i>T. cruzi</i> | 167 | 770  | 936  |
| Tc00.1047053506885.489 | <i>T. cruzi</i> | 46  | 427  | 472  |

|                        |                 |     |      |      |
|------------------------|-----------------|-----|------|------|
| Tc00.1047053506885.489 | <i>T. cruzi</i> | 51  | 1621 | 1671 |
| Tc00.1047053506885.489 | <i>T. cruzi</i> | 88  | 2850 | 2937 |
| Tc00.1047053506885.489 | <i>T. cruzi</i> | 78  | 3407 | 3484 |
| Tc00.1047053506885.50  | <i>T. cruzi</i> | 94  | 74   | 167  |
| Tc00.1047053506885.50  | <i>T. cruzi</i> | 68  | 253  | 320  |
| Tc00.1047053506885.60  | <i>T. cruzi</i> | 104 | 41   | 144  |
| Tc00.1047053506885.60  | <i>T. cruzi</i> | 138 | 164  | 301  |
| Tc00.1047053506885.60  | <i>T. cruzi</i> | 122 | 331  | 452  |
| Tc00.1047053506885.60  | <i>T. cruzi</i> | 52  | 483  | 534  |
| Tc00.1047053506885.70  | <i>T. cruzi</i> | 142 | 366  | 507  |
| Tc00.1047053506885.90  | <i>T. cruzi</i> | 198 | 107  | 304  |
| Tc00.1047053506887.20  | <i>T. cruzi</i> | 137 | 1    | 137  |
| Tc00.1047053506887.40  | <i>T. cruzi</i> | 49  | 99   | 147  |
| Tc00.1047053506887.40  | <i>T. cruzi</i> | 40  | 362  | 401  |
| Tc00.1047053506887.40  | <i>T. cruzi</i> | 40  | 362  | 401  |
| Tc00.1047053506887.50  | <i>T. cruzi</i> | 69  | 305  | 373  |
| Tc00.1047053506887.60  | <i>T. cruzi</i> | 43  | 98   | 140  |
| Tc00.1047053506887.69  | <i>T. cruzi</i> | 114 | 1    | 114  |
| Tc00.1047053506887.80  | <i>T. cruzi</i> | 112 | 1    | 112  |
| Tc00.1047053506891.10  | <i>T. cruzi</i> | 234 | 205  | 438  |
| Tc00.1047053506891.20  | <i>T. cruzi</i> | 69  | 397  | 465  |
| Tc00.1047053506891.20  | <i>T. cruzi</i> | 186 | 539  | 724  |
| Tc00.1047053506893.10  | <i>T. cruzi</i> | 149 | 27   | 175  |
| Tc00.1047053506893.60  | <i>T. cruzi</i> | 49  | 42   | 90   |
| Tc00.1047053506893.60  | <i>T. cruzi</i> | 135 | 202  | 336  |
| Tc00.1047053506893.70  | <i>T. cruzi</i> | 114 | 101  | 214  |
| Tc00.1047053506893.70  | <i>T. cruzi</i> | 276 | 303  | 578  |
| Tc00.1047053506895.20  | <i>T. cruzi</i> | 89  | 443  | 531  |
| Tc00.1047053506895.30  | <i>T. cruzi</i> | 83  | 114  | 196  |
| Tc00.1047053506895.40  | <i>T. cruzi</i> | 70  | 65   | 134  |
| Tc00.1047053506895.40  | <i>T. cruzi</i> | 40  | 311  | 350  |
| Tc00.1047053506895.40  | <i>T. cruzi</i> | 124 | 447  | 570  |
| Tc00.1047053506895.50  | <i>T. cruzi</i> | 79  | 377  | 455  |
| Tc00.1047053506907.14  | <i>T. cruzi</i> | 43  | 52   | 94   |
| Tc00.1047053506907.14  | <i>T. cruzi</i> | 93  | 533  | 625  |
| Tc00.1047053506907.14  | <i>T. cruzi</i> | 189 | 631  | 819  |
| Tc00.1047053506907.14  | <i>T. cruzi</i> | 420 | 960  | 1379 |
| Tc00.1047053506907.30  | <i>T. cruzi</i> | 234 | 1    | 234  |
| Tc00.1047053506925.10  | <i>T. cruzi</i> | 85  | 227  | 311  |
| Tc00.1047053506925.100 | <i>T. cruzi</i> | 164 | 12   | 175  |
| Tc00.1047053506925.110 | <i>T. cruzi</i> | 88  | 187  | 274  |
| Tc00.1047053506925.140 | <i>T. cruzi</i> | 54  | 97   | 150  |
| Tc00.1047053506925.140 | <i>T. cruzi</i> | 123 | 284  | 406  |
| Tc00.1047053506925.140 | <i>T. cruzi</i> | 61  | 743  | 803  |
| Tc00.1047053506925.150 | <i>T. cruzi</i> | 60  | 348  | 407  |
| Tc00.1047053506925.170 | <i>T. cruzi</i> | 78  | 224  | 301  |
| Tc00.1047053506925.180 | <i>T. cruzi</i> | 53  | 26   | 78   |

|                        |                 |     |      |      |
|------------------------|-----------------|-----|------|------|
| Tc00.1047053506925.180 | <i>T. cruzi</i> | 44  | 147  | 190  |
| Tc00.1047053506925.180 | <i>T. cruzi</i> | 85  | 232  | 316  |
| Tc00.1047053506925.180 | <i>T. cruzi</i> | 53  | 441  | 493  |
| Tc00.1047053506925.180 | <i>T. cruzi</i> | 49  | 535  | 583  |
| Tc00.1047053506925.190 | <i>T. cruzi</i> | 40  | 64   | 103  |
| Tc00.1047053506925.20  | <i>T. cruzi</i> | 114 | 198  | 311  |
| Tc00.1047053506925.200 | <i>T. cruzi</i> | 62  | 39   | 100  |
| Tc00.1047053506925.200 | <i>T. cruzi</i> | 51  | 401  | 451  |
| Tc00.1047053506925.200 | <i>T. cruzi</i> | 58  | 666  | 723  |
| Tc00.1047053506925.220 | <i>T. cruzi</i> | 374 | 251  | 624  |
| Tc00.1047053506925.220 | <i>T. cruzi</i> | 80  | 797  | 876  |
| Tc00.1047053506925.230 | <i>T. cruzi</i> | 189 | 54   | 242  |
| Tc00.1047053506925.230 | <i>T. cruzi</i> | 125 | 464  | 588  |
| Tc00.1047053506925.230 | <i>T. cruzi</i> | 69  | 622  | 690  |
| Tc00.1047053506925.230 | <i>T. cruzi</i> | 139 | 720  | 858  |
| Tc00.1047053506925.270 | <i>T. cruzi</i> | 64  | 1    | 64   |
| Tc00.1047053506925.270 | <i>T. cruzi</i> | 303 | 294  | 596  |
| Tc00.1047053506925.270 | <i>T. cruzi</i> | 256 | 705  | 960  |
| Tc00.1047053506925.290 | <i>T. cruzi</i> | 81  | 145  | 225  |
| Tc00.1047053506925.290 | <i>T. cruzi</i> | 63  | 255  | 317  |
| Tc00.1047053506925.30  | <i>T. cruzi</i> | 68  | 869  | 936  |
| Tc00.1047053506925.310 | <i>T. cruzi</i> | 45  | 28   | 72   |
| Tc00.1047053506925.340 | <i>T. cruzi</i> | 61  | 379  | 439  |
| Tc00.1047053506925.350 | <i>T. cruzi</i> | 78  | 1    | 78   |
| Tc00.1047053506925.350 | <i>T. cruzi</i> | 191 | 203  | 393  |
| Tc00.1047053506925.350 | <i>T. cruzi</i> | 41  | 680  | 720  |
| Tc00.1047053506925.360 | <i>T. cruzi</i> | 95  | 28   | 122  |
| Tc00.1047053506925.380 | <i>T. cruzi</i> | 78  | 28   | 105  |
| Tc00.1047053506925.40  | <i>T. cruzi</i> | 54  | 1    | 54   |
| Tc00.1047053506925.40  | <i>T. cruzi</i> | 54  | 279  | 332  |
| Tc00.1047053506925.40  | <i>T. cruzi</i> | 40  | 1460 | 1499 |
| Tc00.1047053506925.400 | <i>T. cruzi</i> | 47  | 307  | 353  |
| Tc00.1047053506925.410 | <i>T. cruzi</i> | 66  | 559  | 624  |
| Tc00.1047053506925.450 | <i>T. cruzi</i> | 72  | 610  | 681  |
| Tc00.1047053506925.460 | <i>T. cruzi</i> | 63  | 1    | 63   |
| Tc00.1047053506925.460 | <i>T. cruzi</i> | 64  | 76   | 139  |
| Tc00.1047053506925.460 | <i>T. cruzi</i> | 64  | 76   | 139  |
| Tc00.1047053506925.470 | <i>T. cruzi</i> | 197 | 110  | 306  |
| Tc00.1047053506925.490 | <i>T. cruzi</i> | 166 | 1    | 166  |
| Tc00.1047053506925.490 | <i>T. cruzi</i> | 209 | 169  | 377  |
| Tc00.1047053506925.490 | <i>T. cruzi</i> | 287 | 388  | 674  |
| Tc00.1047053506925.500 | <i>T. cruzi</i> | 42  | 410  | 451  |
| Tc00.1047053506925.510 | <i>T. cruzi</i> | 113 | 1    | 113  |
| Tc00.1047053506925.520 | <i>T. cruzi</i> | 135 | 317  | 451  |
| Tc00.1047053506925.540 | <i>T. cruzi</i> | 40  | 358  | 397  |
| Tc00.1047053506925.540 | <i>T. cruzi</i> | 90  | 457  | 546  |
| Tc00.1047053506925.70  | <i>T. cruzi</i> | 390 | 138  | 527  |

|                        |                 |     |      |      |
|------------------------|-----------------|-----|------|------|
| Tc00.1047053506925.80  | <i>T. cruzi</i> | 52  | 566  | 617  |
| Tc00.1047053506925.90  | <i>T. cruzi</i> | 46  | 189  | 234  |
| Tc00.1047053506927.30  | <i>T. cruzi</i> | 70  | 24   | 93   |
| Tc00.1047053506929.20  | <i>T. cruzi</i> | 178 | 62   | 239  |
| Tc00.1047053506929.20  | <i>T. cruzi</i> | 56  | 364  | 419  |
| Tc00.1047053506929.40  | <i>T. cruzi</i> | 50  | 80   | 129  |
| Tc00.1047053506929.40  | <i>T. cruzi</i> | 43  | 156  | 198  |
| Tc00.1047053506929.40  | <i>T. cruzi</i> | 43  | 156  | 198  |
| Tc00.1047053506929.50  | <i>T. cruzi</i> | 62  | 562  | 623  |
| Tc00.1047053506929.54  | <i>T. cruzi</i> | 126 | 1    | 126  |
| Tc00.1047053506929.54  | <i>T. cruzi</i> | 56  | 207  | 262  |
| Tc00.1047053506929.54  | <i>T. cruzi</i> | 56  | 207  | 262  |
| Tc00.1047053506931.20  | <i>T. cruzi</i> | 139 | 123  | 261  |
| Tc00.1047053506931.30  | <i>T. cruzi</i> | 119 | 42   | 160  |
| Tc00.1047053506931.4   | <i>T. cruzi</i> | 104 | 118  | 221  |
| Tc00.1047053506931.40  | <i>T. cruzi</i> | 41  | 1    | 41   |
| Tc00.1047053506931.60  | <i>T. cruzi</i> | 94  | 49   | 142  |
| Tc00.1047053506931.60  | <i>T. cruzi</i> | 65  | 398  | 462  |
| Tc00.1047053506931.60  | <i>T. cruzi</i> | 57  | 504  | 560  |
| Tc00.1047053506931.64  | <i>T. cruzi</i> | 40  | 22   | 61   |
| Tc00.1047053506931.70  | <i>T. cruzi</i> | 48  | 135  | 182  |
| Tc00.1047053506931.70  | <i>T. cruzi</i> | 116 | 306  | 421  |
| Tc00.1047053506933.10  | <i>T. cruzi</i> | 78  | 1    | 78   |
| Tc00.1047053506933.10  | <i>T. cruzi</i> | 130 | 106  | 235  |
| Tc00.1047053506933.10  | <i>T. cruzi</i> | 130 | 106  | 235  |
| Tc00.1047053506933.30  | <i>T. cruzi</i> | 68  | 49   | 116  |
| Tc00.1047053506933.40  | <i>T. cruzi</i> | 167 | 1    | 167  |
| Tc00.1047053506933.40  | <i>T. cruzi</i> | 74  | 691  | 764  |
| Tc00.1047053506933.43  | <i>T. cruzi</i> | 47  | 285  | 331  |
| Tc00.1047053506933.46  | <i>T. cruzi</i> | 145 | 26   | 170  |
| Tc00.1047053506933.60  | <i>T. cruzi</i> | 82  | 61   | 142  |
| Tc00.1047053506933.70  | <i>T. cruzi</i> | 57  | 22   | 78   |
| Tc00.1047053506933.70  | <i>T. cruzi</i> | 233 | 158  | 390  |
| Tc00.1047053506933.89  | <i>T. cruzi</i> | 42  | 113  | 154  |
| Tc00.1047053506937.30  | <i>T. cruzi</i> | 55  | 126  | 180  |
| Tc00.1047053506941.100 | <i>T. cruzi</i> | 44  | 155  | 198  |
| Tc00.1047053506941.100 | <i>T. cruzi</i> | 61  | 403  | 463  |
| Tc00.1047053506941.100 | <i>T. cruzi</i> | 154 | 661  | 814  |
| Tc00.1047053506941.100 | <i>T. cruzi</i> | 58  | 1042 | 1099 |
| Tc00.1047053506941.139 | <i>T. cruzi</i> | 55  | 93   | 147  |
| Tc00.1047053506941.139 | <i>T. cruzi</i> | 68  | 178  | 245  |
| Tc00.1047053506941.139 | <i>T. cruzi</i> | 62  | 257  | 318  |
| Tc00.1047053506941.139 | <i>T. cruzi</i> | 97  | 392  | 488  |
| Tc00.1047053506941.139 | <i>T. cruzi</i> | 97  | 599  | 695  |
| Tc00.1047053506941.159 | <i>T. cruzi</i> | 59  | 347  | 405  |
| Tc00.1047053506941.170 | <i>T. cruzi</i> | 63  | 1    | 63   |
| Tc00.1047053506941.180 | <i>T. cruzi</i> | 79  | 76   | 154  |

|                        |                 |     |      |      |
|------------------------|-----------------|-----|------|------|
| Tc00.1047053506941.180 | <i>T. cruzi</i> | 124 | 175  | 298  |
| Tc00.1047053506941.180 | <i>T. cruzi</i> | 124 | 175  | 298  |
| Tc00.1047053506941.194 | <i>T. cruzi</i> | 46  | 299  | 344  |
| Tc00.1047053506941.194 | <i>T. cruzi</i> | 106 | 827  | 932  |
| Tc00.1047053506941.194 | <i>T. cruzi</i> | 72  | 2233 | 2304 |
| Tc00.1047053506941.194 | <i>T. cruzi</i> | 47  | 3125 | 3171 |
| Tc00.1047053506941.238 | <i>T. cruzi</i> | 61  | 59   | 119  |
| Tc00.1047053506941.250 | <i>T. cruzi</i> | 52  | 305  | 356  |
| Tc00.1047053506941.250 | <i>T. cruzi</i> | 287 | 393  | 679  |
| Tc00.1047053506941.260 | <i>T. cruzi</i> | 63  | 1    | 63   |
| Tc00.1047053506941.270 | <i>T. cruzi</i> | 167 | 38   | 204  |
| Tc00.1047053506941.30  | <i>T. cruzi</i> | 86  | 18   | 103  |
| Tc00.1047053506941.30  | <i>T. cruzi</i> | 146 | 125  | 270  |
| Tc00.1047053506941.50  | <i>T. cruzi</i> | 73  | 83   | 155  |
| Tc00.1047053506941.50  | <i>T. cruzi</i> | 73  | 269  | 341  |
| Tc00.1047053506941.50  | <i>T. cruzi</i> | 73  | 269  | 341  |
| Tc00.1047053506941.70  | <i>T. cruzi</i> | 67  | 196  | 262  |
| Tc00.1047053506941.70  | <i>T. cruzi</i> | 190 | 284  | 473  |
| Tc00.1047053506941.70  | <i>T. cruzi</i> | 118 | 509  | 626  |
| Tc00.1047053506941.70  | <i>T. cruzi</i> | 52  | 1179 | 1230 |
| Tc00.1047053506941.70  | <i>T. cruzi</i> | 127 | 1362 | 1488 |
| Tc00.1047053506941.80  | <i>T. cruzi</i> | 66  | 1    | 66   |
| Tc00.1047053506941.80  | <i>T. cruzi</i> | 55  | 122  | 176  |
| Tc00.1047053506941.80  | <i>T. cruzi</i> | 44  | 372  | 415  |
| Tc00.1047053506941.9   | <i>T. cruzi</i> | 42  | 707  | 748  |
| Tc00.1047053506941.90  | <i>T. cruzi</i> | 47  | 224  | 270  |
| Tc00.1047053506943.100 | <i>T. cruzi</i> | 109 | 163  | 271  |
| Tc00.1047053506943.114 | <i>T. cruzi</i> | 44  | 74   | 117  |
| Tc00.1047053506943.120 | <i>T. cruzi</i> | 75  | 218  | 292  |
| Tc00.1047053506943.160 | <i>T. cruzi</i> | 48  | 53   | 100  |
| Tc00.1047053506943.160 | <i>T. cruzi</i> | 40  | 463  | 502  |
| Tc00.1047053506943.160 | <i>T. cruzi</i> | 40  | 463  | 502  |
| Tc00.1047053506943.20  | <i>T. cruzi</i> | 269 | 239  | 507  |
| Tc00.1047053506943.40  | <i>T. cruzi</i> | 90  | 135  | 224  |
| Tc00.1047053506943.69  | <i>T. cruzi</i> | 61  | 150  | 210  |
| Tc00.1047053506943.80  | <i>T. cruzi</i> | 41  | 271  | 311  |
| Tc00.1047053506945.100 | <i>T. cruzi</i> | 44  | 30   | 73   |
| Tc00.1047053506945.100 | <i>T. cruzi</i> | 45  | 132  | 176  |
| Tc00.1047053506945.100 | <i>T. cruzi</i> | 45  | 132  | 176  |
| Tc00.1047053506945.110 | <i>T. cruzi</i> | 47  | 318  | 364  |
| Tc00.1047053506945.120 | <i>T. cruzi</i> | 101 | 78   | 178  |
| Tc00.1047053506945.180 | <i>T. cruzi</i> | 72  | 1    | 72   |
| Tc00.1047053506945.180 | <i>T. cruzi</i> | 42  | 195  | 236  |
| Tc00.1047053506945.180 | <i>T. cruzi</i> | 42  | 195  | 236  |
| Tc00.1047053506945.210 | <i>T. cruzi</i> | 62  | 51   | 112  |
| Tc00.1047053506945.210 | <i>T. cruzi</i> | 56  | 208  | 263  |
| Tc00.1047053506945.210 | <i>T. cruzi</i> | 56  | 208  | 263  |



|                        |                 |     |      |      |
|------------------------|-----------------|-----|------|------|
| Tc00.1047053506945.220 | <i>T. cruzi</i> | 145 | 1    | 145  |
| Tc00.1047053506945.220 | <i>T. cruzi</i> | 89  | 307  | 395  |
| Tc00.1047053506945.220 | <i>T. cruzi</i> | 68  | 569  | 636  |
| Tc00.1047053506945.220 | <i>T. cruzi</i> | 57  | 660  | 716  |
| Tc00.1047053506945.230 | <i>T. cruzi</i> | 51  | 94   | 144  |
| Tc00.1047053506945.250 | <i>T. cruzi</i> | 67  | 68   | 134  |
| Tc00.1047053506945.260 | <i>T. cruzi</i> | 134 | 36   | 169  |
| Tc00.1047053506945.260 | <i>T. cruzi</i> | 75  | 205  | 279  |
| Tc00.1047053506945.260 | <i>T. cruzi</i> | 79  | 297  | 375  |
| Tc00.1047053506945.280 | <i>T. cruzi</i> | 40  | 223  | 262  |
| Tc00.1047053506945.280 | <i>T. cruzi</i> | 44  | 304  | 347  |
| Tc00.1047053506945.280 | <i>T. cruzi</i> | 44  | 304  | 347  |
| Tc00.1047053506945.290 | <i>T. cruzi</i> | 51  | 39   | 89   |
| Tc00.1047053506945.290 | <i>T. cruzi</i> | 46  | 159  | 204  |
| Tc00.1047053506945.290 | <i>T. cruzi</i> | 46  | 159  | 204  |
| Tc00.1047053506945.30  | <i>T. cruzi</i> | 41  | 1    | 41   |
| Tc00.1047053506945.320 | <i>T. cruzi</i> | 46  | 1    | 46   |
| Tc00.1047053506945.320 | <i>T. cruzi</i> | 53  | 116  | 168  |
| Tc00.1047053506945.320 | <i>T. cruzi</i> | 52  | 227  | 278  |
| Tc00.1047053506945.330 | <i>T. cruzi</i> | 49  | 85   | 133  |
| Tc00.1047053506945.340 | <i>T. cruzi</i> | 58  | 1    | 58   |
| Tc00.1047053506945.350 | <i>T. cruzi</i> | 150 | 1    | 150  |
| Tc00.1047053506945.350 | <i>T. cruzi</i> | 54  | 419  | 472  |
| Tc00.1047053506945.350 | <i>T. cruzi</i> | 52  | 492  | 543  |
| Tc00.1047053506945.40  | <i>T. cruzi</i> | 58  | 48   | 105  |
| Tc00.1047053506945.50  | <i>T. cruzi</i> | 126 | 226  | 351  |
| Tc00.1047053506945.70  | <i>T. cruzi</i> | 47  | 104  | 150  |
| Tc00.1047053506945.80  | <i>T. cruzi</i> | 48  | 167  | 214  |
| Tc00.1047053506947.10  | <i>T. cruzi</i> | 56  | 299  | 354  |
| Tc00.1047053506947.20  | <i>T. cruzi</i> | 80  | 1    | 80   |
| Tc00.1047053506947.20  | <i>T. cruzi</i> | 68  | 380  | 447  |
| Tc00.1047053506947.20  | <i>T. cruzi</i> | 74  | 513  | 586  |
| Tc00.1047053506947.20  | <i>T. cruzi</i> | 56  | 675  | 730  |
| Tc00.1047053506947.30  | <i>T. cruzi</i> | 86  | 1    | 86   |
| Tc00.1047053506947.40  | <i>T. cruzi</i> | 48  | 100  | 147  |
| Tc00.1047053506947.40  | <i>T. cruzi</i> | 60  | 896  | 955  |
| Tc00.1047053506947.40  | <i>T. cruzi</i> | 60  | 896  | 955  |
| Tc00.1047053506949.20  | <i>T. cruzi</i> | 41  | 302  | 342  |
| Tc00.1047053506949.20  | <i>T. cruzi</i> | 94  | 520  | 613  |
| Tc00.1047053506949.20  | <i>T. cruzi</i> | 57  | 657  | 713  |
| Tc00.1047053506949.20  | <i>T. cruzi</i> | 61  | 1317 | 1377 |
| Tc00.1047053506949.20  | <i>T. cruzi</i> | 40  | 1512 | 1551 |
| Tc00.1047053506949.20  | <i>T. cruzi</i> | 69  | 1699 | 1767 |
| Tc00.1047053506949.20  | <i>T. cruzi</i> | 73  | 2118 | 2190 |
| Tc00.1047053506949.20  | <i>T. cruzi</i> | 212 | 2475 | 2686 |
| Tc00.1047053506949.20  | <i>T. cruzi</i> | 49  | 2811 | 2859 |
| Tc00.1047053506949.30  | <i>T. cruzi</i> | 262 | 49   | 310  |

|                        |                 |     |      |      |
|------------------------|-----------------|-----|------|------|
| Tc00.1047053506949.30  | <i>T. cruzi</i> | 203 | 351  | 553  |
| Tc00.1047053506949.30  | <i>T. cruzi</i> | 233 | 559  | 791  |
| Tc00.1047053506949.30  | <i>T. cruzi</i> | 50  | 910  | 959  |
| Tc00.1047053506951.60  | <i>T. cruzi</i> | 323 | 29   | 351  |
| Tc00.1047053506951.80  | <i>T. cruzi</i> | 46  | 1    | 46   |
| Tc00.1047053506951.80  | <i>T. cruzi</i> | 167 | 705  | 871  |
| Tc00.1047053506951.90  | <i>T. cruzi</i> | 45  | 1    | 45   |
| Tc00.1047053506951.90  | <i>T. cruzi</i> | 211 | 681  | 891  |
| Tc00.1047053506953.20  | <i>T. cruzi</i> | 109 | 174  | 282  |
| Tc00.1047053506953.40  | <i>T. cruzi</i> | 118 | 498  | 615  |
| Tc00.1047053506953.40  | <i>T. cruzi</i> | 77  | 891  | 967  |
| Tc00.1047053506953.40  | <i>T. cruzi</i> | 43  | 992  | 1034 |
| Tc00.1047053506961.10  | <i>T. cruzi</i> | 58  | 1    | 58   |
| Tc00.1047053506961.150 | <i>T. cruzi</i> | 43  | 1    | 43   |
| Tc00.1047053506961.150 | <i>T. cruzi</i> | 294 | 727  | 1020 |
| Tc00.1047053506961.160 | <i>T. cruzi</i> | 70  | 107  | 176  |
| Tc00.1047053506961.20  | <i>T. cruzi</i> | 81  | 26   | 106  |
| Tc00.1047053506961.25  | <i>T. cruzi</i> | 332 | 687  | 1018 |
| Tc00.1047053506961.30  | <i>T. cruzi</i> | 129 | 1    | 129  |
| Tc00.1047053506961.50  | <i>T. cruzi</i> | 58  | 1593 | 1650 |
| Tc00.1047053506961.50  | <i>T. cruzi</i> | 65  | 2841 | 2905 |
| Tc00.1047053506961.50  | <i>T. cruzi</i> | 84  | 3385 | 3468 |
| Tc00.1047053506961.90  | <i>T. cruzi</i> | 54  | 107  | 160  |
| Tc00.1047053506963.100 | <i>T. cruzi</i> | 41  | 66   | 106  |
| Tc00.1047053506963.100 | <i>T. cruzi</i> | 67  | 289  | 355  |
| Tc00.1047053506963.100 | <i>T. cruzi</i> | 67  | 289  | 355  |
| Tc00.1047053506963.20  | <i>T. cruzi</i> | 83  | 1    | 83   |
| Tc00.1047053506963.20  | <i>T. cruzi</i> | 78  | 94   | 171  |
| Tc00.1047053506963.30  | <i>T. cruzi</i> | 40  | 1    | 40   |
| Tc00.1047053506963.30  | <i>T. cruzi</i> | 44  | 179  | 222  |
| Tc00.1047053506963.30  | <i>T. cruzi</i> | 44  | 179  | 222  |
| Tc00.1047053506963.40  | <i>T. cruzi</i> | 115 | 126  | 240  |
| Tc00.1047053506963.40  | <i>T. cruzi</i> | 47  | 411  | 457  |
| Tc00.1047053506963.40  | <i>T. cruzi</i> | 114 | 481  | 594  |
| Tc00.1047053506963.70  | <i>T. cruzi</i> | 99  | 174  | 272  |
| Tc00.1047053506965.10  | <i>T. cruzi</i> | 221 | 31   | 251  |
| Tc00.1047053506965.100 | <i>T. cruzi</i> | 209 | 94   | 302  |
| Tc00.1047053506965.120 | <i>T. cruzi</i> | 63  | 40   | 102  |
| Tc00.1047053506965.130 | <i>T. cruzi</i> | 333 | 55   | 387  |
| Tc00.1047053506965.140 | <i>T. cruzi</i> | 311 | 33   | 343  |
| Tc00.1047053506965.160 | <i>T. cruzi</i> | 195 | 57   | 251  |
| Tc00.1047053506965.170 | <i>T. cruzi</i> | 48  | 1    | 48   |
| Tc00.1047053506965.180 | <i>T. cruzi</i> | 234 | 28   | 261  |
| Tc00.1047053506965.190 | <i>T. cruzi</i> | 178 | 15   | 192  |
| Tc00.1047053506965.20  | <i>T. cruzi</i> | 208 | 96   | 303  |
| Tc00.1047053506965.70  | <i>T. cruzi</i> | 334 | 55   | 388  |
| Tc00.1047053506965.90  | <i>T. cruzi</i> | 161 | 23   | 183  |

|                        |                 |     |      |      |
|------------------------|-----------------|-----|------|------|
| Tc00.1047053506967.10  | <i>T. cruzi</i> | 92  | 1    | 92   |
| Tc00.1047053506967.10  | <i>T. cruzi</i> | 50  | 133  | 182  |
| Tc00.1047053506967.10  | <i>T. cruzi</i> | 50  | 292  | 341  |
| Tc00.1047053506967.100 | <i>T. cruzi</i> | 303 | 49   | 351  |
| Tc00.1047053506967.110 | <i>T. cruzi</i> | 141 | 29   | 169  |
| Tc00.1047053506967.40  | <i>T. cruzi</i> | 160 | 26   | 185  |
| Tc00.1047053506967.50  | <i>T. cruzi</i> | 297 | 29   | 325  |
| Tc00.1047053506967.60  | <i>T. cruzi</i> | 48  | 1    | 48   |
| Tc00.1047053506967.60  | <i>T. cruzi</i> | 60  | 127  | 186  |
| Tc00.1047053506967.60  | <i>T. cruzi</i> | 44  | 300  | 343  |
| Tc00.1047053506967.60  | <i>T. cruzi</i> | 43  | 423  | 465  |
| Tc00.1047053506967.60  | <i>T. cruzi</i> | 206 | 742  | 947  |
| Tc00.1047053506967.70  | <i>T. cruzi</i> | 350 | 30   | 379  |
| Tc00.1047053506969.3   | <i>T. cruzi</i> | 83  | 31   | 113  |
| Tc00.1047053506971.20  | <i>T. cruzi</i> | 149 | 622  | 770  |
| Tc00.1047053506971.60  | <i>T. cruzi</i> | 194 | 64   | 257  |
| Tc00.1047053506971.70  | <i>T. cruzi</i> | 142 | 23   | 164  |
| Tc00.1047053506971.80  | <i>T. cruzi</i> | 130 | 78   | 207  |
| Tc00.1047053506973.10  | <i>T. cruzi</i> | 43  | 1    | 43   |
| Tc00.1047053506973.10  | <i>T. cruzi</i> | 65  | 112  | 176  |
| Tc00.1047053506973.10  | <i>T. cruzi</i> | 41  | 423  | 463  |
| Tc00.1047053506973.10  | <i>T. cruzi</i> | 44  | 469  | 512  |
| Tc00.1047053506973.10  | <i>T. cruzi</i> | 40  | 612  | 651  |
| Tc00.1047053506973.10  | <i>T. cruzi</i> | 51  | 669  | 719  |
| Tc00.1047053506973.10  | <i>T. cruzi</i> | 173 | 722  | 894  |
| Tc00.1047053506973.120 | <i>T. cruzi</i> | 63  | 34   | 96   |
| Tc00.1047053506973.120 | <i>T. cruzi</i> | 40  | 184  | 223  |
| Tc00.1047053506973.120 | <i>T. cruzi</i> | 44  | 388  | 431  |
| Tc00.1047053506973.120 | <i>T. cruzi</i> | 41  | 481  | 521  |
| Tc00.1047053506973.120 | <i>T. cruzi</i> | 89  | 788  | 876  |
| Tc00.1047053506973.20  | <i>T. cruzi</i> | 372 | 107  | 478  |
| Tc00.1047053506973.25  | <i>T. cruzi</i> | 57  | 112  | 168  |
| Tc00.1047053506973.25  | <i>T. cruzi</i> | 151 | 170  | 320  |
| Tc00.1047053506973.30  | <i>T. cruzi</i> | 246 | 68   | 313  |
| Tc00.1047053506973.70  | <i>T. cruzi</i> | 43  | 429  | 471  |
| Tc00.1047053506973.70  | <i>T. cruzi</i> | 51  | 1617 | 1667 |
| Tc00.1047053506973.70  | <i>T. cruzi</i> | 72  | 2846 | 2917 |
| Tc00.1047053506973.70  | <i>T. cruzi</i> | 51  | 3397 | 3447 |
| Tc00.1047053506979.40  | <i>T. cruzi</i> | 109 | 88   | 196  |
| Tc00.1047053506979.40  | <i>T. cruzi</i> | 56  | 233  | 288  |
| Tc00.1047053506979.59  | <i>T. cruzi</i> | 53  | 73   | 125  |
| Tc00.1047053507009.120 | <i>T. cruzi</i> | 107 | 81   | 187  |
| Tc00.1047053507009.120 | <i>T. cruzi</i> | 47  | 245  | 291  |
| Tc00.1047053507009.120 | <i>T. cruzi</i> | 132 | 318  | 449  |
| Tc00.1047053507009.120 | <i>T. cruzi</i> | 65  | 680  | 744  |
| Tc00.1047053507009.130 | <i>T. cruzi</i> | 51  | 1    | 51   |
| Tc00.1047053507009.130 | <i>T. cruzi</i> | 56  | 903  | 958  |

|                        |                 |     |     |      |
|------------------------|-----------------|-----|-----|------|
| Tc00.1047053507009.130 | <i>T. cruzi</i> | 56  | 903 | 958  |
| Tc00.1047053507009.60  | <i>T. cruzi</i> | 50  | 102 | 151  |
| Tc00.1047053507009.60  | <i>T. cruzi</i> | 61  | 795 | 855  |
| Tc00.1047053507009.60  | <i>T. cruzi</i> | 61  | 795 | 855  |
| Tc00.1047053507009.70  | <i>T. cruzi</i> | 134 | 114 | 247  |
| Tc00.1047053507009.70  | <i>T. cruzi</i> | 204 | 250 | 453  |
| Tc00.1047053507009.70  | <i>T. cruzi</i> | 59  | 512 | 570  |
| Tc00.1047053507009.70  | <i>T. cruzi</i> | 55  | 600 | 654  |
| Tc00.1047053507009.70  | <i>T. cruzi</i> | 61  | 690 | 750  |
| Tc00.1047053507009.80  | <i>T. cruzi</i> | 51  | 136 | 186  |
| Tc00.1047053507011.100 | <i>T. cruzi</i> | 73  | 192 | 264  |
| Tc00.1047053507011.100 | <i>T. cruzi</i> | 144 | 434 | 577  |
| Tc00.1047053507011.100 | <i>T. cruzi</i> | 145 | 609 | 753  |
| Tc00.1047053507011.120 | <i>T. cruzi</i> | 44  | 298 | 341  |
| Tc00.1047053507011.130 | <i>T. cruzi</i> | 90  | 304 | 393  |
| Tc00.1047053507011.140 | <i>T. cruzi</i> | 172 | 56  | 227  |
| Tc00.1047053507011.140 | <i>T. cruzi</i> | 47  | 397 | 443  |
| Tc00.1047053507011.140 | <i>T. cruzi</i> | 41  | 632 | 672  |
| Tc00.1047053507011.170 | <i>T. cruzi</i> | 57  | 169 | 225  |
| Tc00.1047053507011.170 | <i>T. cruzi</i> | 44  | 327 | 370  |
| Tc00.1047053507011.170 | <i>T. cruzi</i> | 44  | 327 | 370  |
| Tc00.1047053507011.210 | <i>T. cruzi</i> | 55  | 1   | 55   |
| Tc00.1047053507011.240 | <i>T. cruzi</i> | 80  | 42  | 121  |
| Tc00.1047053507011.240 | <i>T. cruzi</i> | 84  | 123 | 206  |
| Tc00.1047053507011.240 | <i>T. cruzi</i> | 84  | 123 | 206  |
| Tc00.1047053507011.260 | <i>T. cruzi</i> | 81  | 151 | 231  |
| Tc00.1047053507011.260 | <i>T. cruzi</i> | 85  | 324 | 408  |
| Tc00.1047053507011.260 | <i>T. cruzi</i> | 85  | 324 | 408  |
| Tc00.1047053507011.40  | <i>T. cruzi</i> | 81  | 110 | 190  |
| Tc00.1047053507011.40  | <i>T. cruzi</i> | 60  | 194 | 253  |
| Tc00.1047053507011.40  | <i>T. cruzi</i> | 56  | 285 | 340  |
| Tc00.1047053507011.40  | <i>T. cruzi</i> | 231 | 411 | 641  |
| Tc00.1047053507011.60  | <i>T. cruzi</i> | 68  | 177 | 244  |
| Tc00.1047053507011.60  | <i>T. cruzi</i> | 268 | 253 | 520  |
| Tc00.1047053507011.60  | <i>T. cruzi</i> | 176 | 684 | 859  |
| Tc00.1047053507011.60  | <i>T. cruzi</i> | 76  | 863 | 938  |
| Tc00.1047053507011.60  | <i>T. cruzi</i> | 144 | 963 | 1106 |
| Tc00.1047053507011.70  | <i>T. cruzi</i> | 59  | 32  | 90   |
| Tc00.1047053507011.70  | <i>T. cruzi</i> | 219 | 149 | 367  |
| Tc00.1047053507011.90  | <i>T. cruzi</i> | 198 | 195 | 392  |
| Tc00.1047053507013.20  | <i>T. cruzi</i> | 92  | 1   | 92   |
| Tc00.1047053507013.20  | <i>T. cruzi</i> | 98  | 219 | 316  |
| Tc00.1047053507013.20  | <i>T. cruzi</i> | 48  | 331 | 378  |
| Tc00.1047053507013.20  | <i>T. cruzi</i> | 120 | 421 | 540  |
| Tc00.1047053507013.30  | <i>T. cruzi</i> | 57  | 1   | 57   |
| Tc00.1047053507035.11  | <i>T. cruzi</i> | 46  | 1   | 46   |
| Tc00.1047053507035.11  | <i>T. cruzi</i> | 41  | 223 | 263  |

|                        |                 |     |      |      |
|------------------------|-----------------|-----|------|------|
| Tc00.1047053507035.11  | <i>T. cruzi</i> | 41  | 223  | 263  |
| Tc00.1047053507035.110 | <i>T. cruzi</i> | 48  | 85   | 132  |
| Tc00.1047053507035.120 | <i>T. cruzi</i> | 48  | 192  | 239  |
| Tc00.1047053507035.30  | <i>T. cruzi</i> | 40  | 239  | 278  |
| Tc00.1047053507035.30  | <i>T. cruzi</i> | 48  | 1623 | 1670 |
| Tc00.1047053507035.30  | <i>T. cruzi</i> | 66  | 2856 | 2921 |
| Tc00.1047053507035.30  | <i>T. cruzi</i> | 64  | 3401 | 3464 |
| Tc00.1047053507037.20  | <i>T. cruzi</i> | 133 | 1    | 133  |
| Tc00.1047053507037.20  | <i>T. cruzi</i> | 71  | 416  | 486  |
| Tc00.1047053507037.50  | <i>T. cruzi</i> | 82  | 1    | 82   |
| Tc00.1047053507037.60  | <i>T. cruzi</i> | 52  | 818  | 869  |
| Tc00.1047053507037.60  | <i>T. cruzi</i> | 93  | 907  | 999  |
| Tc00.1047053507037.70  | <i>T. cruzi</i> | 269 | 98   | 366  |
| Tc00.1047053507037.70  | <i>T. cruzi</i> | 129 | 383  | 511  |
| Tc00.1047053507037.80  | <i>T. cruzi</i> | 108 | 1    | 108  |
| Tc00.1047053507037.80  | <i>T. cruzi</i> | 64  | 138  | 201  |
| Tc00.1047053507037.80  | <i>T. cruzi</i> | 44  | 392  | 435  |
| Tc00.1047053507037.80  | <i>T. cruzi</i> | 99  | 447  | 545  |
| Tc00.1047053507037.80  | <i>T. cruzi</i> | 69  | 568  | 636  |
| Tc00.1047053507039.41  | <i>T. cruzi</i> | 49  | 45   | 93   |
| Tc00.1047053507039.41  | <i>T. cruzi</i> | 126 | 234  | 359  |
| Tc00.1047053507041.10  | <i>T. cruzi</i> | 42  | 181  | 222  |
| Tc00.1047053507041.132 | <i>T. cruzi</i> | 77  | 158  | 234  |
| Tc00.1047053507041.20  | <i>T. cruzi</i> | 52  | 56   | 107  |
| Tc00.1047053507041.40  | <i>T. cruzi</i> | 97  | 38   | 134  |
| Tc00.1047053507041.40  | <i>T. cruzi</i> | 45  | 508  | 552  |
| Tc00.1047053507041.40  | <i>T. cruzi</i> | 45  | 508  | 552  |
| Tc00.1047053507041.50  | <i>T. cruzi</i> | 49  | 1    | 49   |
| Tc00.1047053507041.71  | <i>T. cruzi</i> | 73  | 22   | 94   |
| Tc00.1047053507041.80  | <i>T. cruzi</i> | 83  | 116  | 198  |
| Tc00.1047053507041.90  | <i>T. cruzi</i> | 84  | 34   | 117  |
| Tc00.1047053507043.10  | <i>T. cruzi</i> | 82  | 14   | 95   |
| Tc00.1047053507047.100 | <i>T. cruzi</i> | 174 | 1    | 174  |
| Tc00.1047053507047.100 | <i>T. cruzi</i> | 236 | 177  | 412  |
| Tc00.1047053507047.100 | <i>T. cruzi</i> | 179 | 495  | 673  |
| Tc00.1047053507047.100 | <i>T. cruzi</i> | 168 | 796  | 963  |
| Tc00.1047053507047.130 | <i>T. cruzi</i> | 83  | 1    | 83   |
| Tc00.1047053507047.130 | <i>T. cruzi</i> | 115 | 175  | 289  |
| Tc00.1047053507047.130 | <i>T. cruzi</i> | 41  | 356  | 396  |
| Tc00.1047053507047.130 | <i>T. cruzi</i> | 40  | 590  | 629  |
| Tc00.1047053507047.130 | <i>T. cruzi</i> | 49  | 696  | 744  |
| Tc00.1047053507047.140 | <i>T. cruzi</i> | 65  | 229  | 293  |
| Tc00.1047053507047.140 | <i>T. cruzi</i> | 386 | 489  | 874  |
| Tc00.1047053507047.40  | <i>T. cruzi</i> | 46  | 1    | 46   |
| Tc00.1047053507047.40  | <i>T. cruzi</i> | 73  | 586  | 658  |
| Tc00.1047053507047.40  | <i>T. cruzi</i> | 73  | 586  | 658  |
| Tc00.1047053507047.60  | <i>T. cruzi</i> | 41  | 85   | 125  |

|                        |                 |     |      |      |
|------------------------|-----------------|-----|------|------|
| Tc00.1047053507047.60  | <i>T. cruzi</i> | 45  | 392  | 436  |
| Tc00.1047053507047.60  | <i>T. cruzi</i> | 45  | 392  | 436  |
| Tc00.1047053507047.70  | <i>T. cruzi</i> | 168 | 56   | 223  |
| Tc00.1047053507047.80  | <i>T. cruzi</i> | 43  | 1    | 43   |
| Tc00.1047053507047.90  | <i>T. cruzi</i> | 60  | 374  | 433  |
| Tc00.1047053507075.40  | <i>T. cruzi</i> | 174 | 26   | 199  |
| Tc00.1047053507077.20  | <i>T. cruzi</i> | 41  | 76   | 116  |
| Tc00.1047053507077.30  | <i>T. cruzi</i> | 250 | 45   | 294  |
| Tc00.1047053507077.40  | <i>T. cruzi</i> | 79  | 1    | 79   |
| Tc00.1047053507077.40  | <i>T. cruzi</i> | 48  | 249  | 296  |
| Tc00.1047053507077.50  | <i>T. cruzi</i> | 61  | 1    | 61   |
| Tc00.1047053507077.9   | <i>T. cruzi</i> | 71  | 1    | 71   |
| Tc00.1047053507077.9   | <i>T. cruzi</i> | 60  | 392  | 451  |
| Tc00.1047053507079.10  | <i>T. cruzi</i> | 102 | 1    | 102  |
| Tc00.1047053507079.10  | <i>T. cruzi</i> | 239 | 223  | 461  |
| Tc00.1047053507079.10  | <i>T. cruzi</i> | 48  | 485  | 532  |
| Tc00.1047053507079.10  | <i>T. cruzi</i> | 292 | 538  | 829  |
| Tc00.1047053507079.20  | <i>T. cruzi</i> | 53  | 1    | 53   |
| Tc00.1047053507079.20  | <i>T. cruzi</i> | 57  | 103  | 159  |
| Tc00.1047053507079.20  | <i>T. cruzi</i> | 52  | 312  | 363  |
| Tc00.1047053507079.20  | <i>T. cruzi</i> | 129 | 408  | 536  |
| Tc00.1047053507079.20  | <i>T. cruzi</i> | 219 | 568  | 786  |
| Tc00.1047053507083.10  | <i>T. cruzi</i> | 105 | 98   | 202  |
| Tc00.1047053507083.10  | <i>T. cruzi</i> | 59  | 308  | 366  |
| Tc00.1047053507083.10  | <i>T. cruzi</i> | 55  | 452  | 506  |
| Tc00.1047053507083.10  | <i>T. cruzi</i> | 124 | 543  | 666  |
| Tc00.1047053507083.100 | <i>T. cruzi</i> | 49  | 284  | 332  |
| Tc00.1047053507083.100 | <i>T. cruzi</i> | 69  | 454  | 522  |
| Tc00.1047053507083.100 | <i>T. cruzi</i> | 69  | 454  | 522  |
| Tc00.1047053507083.109 | <i>T. cruzi</i> | 45  | 48   | 92   |
| Tc00.1047053507083.109 | <i>T. cruzi</i> | 72  | 141  | 212  |
| Tc00.1047053507083.109 | <i>T. cruzi</i> | 74  | 641  | 714  |
| Tc00.1047053507083.109 | <i>T. cruzi</i> | 75  | 941  | 1015 |
| Tc00.1047053507083.109 | <i>T. cruzi</i> | 64  | 1205 | 1268 |
| Tc00.1047053507083.109 | <i>T. cruzi</i> | 51  | 1492 | 1542 |
| Tc00.1047053507083.109 | <i>T. cruzi</i> | 61  | 1556 | 1616 |
| Tc00.1047053507083.109 | <i>T. cruzi</i> | 50  | 1892 | 1941 |
| Tc00.1047053507083.109 | <i>T. cruzi</i> | 45  | 2127 | 2171 |
| Tc00.1047053507083.109 | <i>T. cruzi</i> | 82  | 2670 | 2751 |
| Tc00.1047053507083.109 | <i>T. cruzi</i> | 45  | 2991 | 3035 |
| Tc00.1047053507083.109 | <i>T. cruzi</i> | 73  | 3856 | 3928 |
| Tc00.1047053507083.109 | <i>T. cruzi</i> | 104 | 4690 | 4793 |
| Tc00.1047053507083.20  | <i>T. cruzi</i> | 40  | 3312 | 3351 |
| Tc00.1047053507083.30  | <i>T. cruzi</i> | 88  | 118  | 205  |
| Tc00.1047053507083.40  | <i>T. cruzi</i> | 54  | 72   | 125  |
| Tc00.1047053507083.40  | <i>T. cruzi</i> | 46  | 190  | 235  |
| Tc00.1047053507083.40  | <i>T. cruzi</i> | 41  | 265  | 305  |

|                        |                 |     |     |     |
|------------------------|-----------------|-----|-----|-----|
| Tc00.1047053507083.50  | <i>T. cruzi</i> | 49  | 88  | 136 |
| Tc00.1047053507083.60  | <i>T. cruzi</i> | 41  | 325 | 365 |
| Tc00.1047053507083.70  | <i>T. cruzi</i> | 138 | 32  | 169 |
| Tc00.1047053507083.70  | <i>T. cruzi</i> | 71  | 183 | 253 |
| Tc00.1047053507083.80  | <i>T. cruzi</i> | 86  | 266 | 351 |
| Tc00.1047053507083.90  | <i>T. cruzi</i> | 67  | 168 | 234 |
| Tc00.1047053507089.100 | <i>T. cruzi</i> | 44  | 1   | 44  |
| Tc00.1047053507089.100 | <i>T. cruzi</i> | 92  | 127 | 218 |
| Tc00.1047053507089.100 | <i>T. cruzi</i> | 92  | 127 | 218 |
| Tc00.1047053507089.110 | <i>T. cruzi</i> | 96  | 1   | 96  |
| Tc00.1047053507089.130 | <i>T. cruzi</i> | 158 | 1   | 158 |
| Tc00.1047053507089.130 | <i>T. cruzi</i> | 311 | 180 | 490 |
| Tc00.1047053507089.130 | <i>T. cruzi</i> | 81  | 506 | 586 |
| Tc00.1047053507089.130 | <i>T. cruzi</i> | 113 | 617 | 729 |
| Tc00.1047053507089.140 | <i>T. cruzi</i> | 60  | 1   | 60  |
| Tc00.1047053507089.140 | <i>T. cruzi</i> | 66  | 80  | 145 |
| Tc00.1047053507089.140 | <i>T. cruzi</i> | 96  | 164 | 259 |
| Tc00.1047053507089.180 | <i>T. cruzi</i> | 60  | 458 | 517 |
| Tc00.1047053507089.200 | <i>T. cruzi</i> | 51  | 44  | 94  |
| Tc00.1047053507089.200 | <i>T. cruzi</i> | 67  | 720 | 786 |
| Tc00.1047053507089.200 | <i>T. cruzi</i> | 67  | 720 | 786 |
| Tc00.1047053507089.220 | <i>T. cruzi</i> | 60  | 166 | 225 |
| Tc00.1047053507089.220 | <i>T. cruzi</i> | 48  | 311 | 358 |
| Tc00.1047053507089.220 | <i>T. cruzi</i> | 40  | 425 | 464 |
| Tc00.1047053507089.220 | <i>T. cruzi</i> | 89  | 580 | 668 |
| Tc00.1047053507089.230 | <i>T. cruzi</i> | 86  | 216 | 301 |
| Tc00.1047053507089.230 | <i>T. cruzi</i> | 121 | 838 | 958 |
| Tc00.1047053507089.240 | <i>T. cruzi</i> | 54  | 65  | 118 |
| Tc00.1047053507089.30  | <i>T. cruzi</i> | 61  | 1   | 61  |
| Tc00.1047053507089.30  | <i>T. cruzi</i> | 198 | 240 | 437 |
| Tc00.1047053507089.50  | <i>T. cruzi</i> | 117 | 1   | 117 |
| Tc00.1047053507089.50  | <i>T. cruzi</i> | 45  | 440 | 484 |
| Tc00.1047053507089.50  | <i>T. cruzi</i> | 45  | 440 | 484 |
| Tc00.1047053507089.60  | <i>T. cruzi</i> | 59  | 68  | 126 |
| Tc00.1047053507089.70  | <i>T. cruzi</i> | 107 | 76  | 182 |
| Tc00.1047053507089.90  | <i>T. cruzi</i> | 97  | 1   | 97  |
| Tc00.1047053507089.90  | <i>T. cruzi</i> | 50  | 128 | 177 |
| Tc00.1047053507089.90  | <i>T. cruzi</i> | 428 | 213 | 640 |
| Tc00.1047053507091.120 | <i>T. cruzi</i> | 391 | 56  | 446 |
| Tc00.1047053507091.20  | <i>T. cruzi</i> | 51  | 35  | 85  |
| Tc00.1047053507091.20  | <i>T. cruzi</i> | 110 | 122 | 231 |
| Tc00.1047053507091.20  | <i>T. cruzi</i> | 51  | 259 | 309 |
| Tc00.1047053507091.20  | <i>T. cruzi</i> | 212 | 360 | 571 |
| Tc00.1047053507091.20  | <i>T. cruzi</i> | 52  | 733 | 784 |
| Tc00.1047053507091.60  | <i>T. cruzi</i> | 45  | 1   | 45  |
| Tc00.1047053507091.60  | <i>T. cruzi</i> | 53  | 121 | 173 |
| Tc00.1047053507091.60  | <i>T. cruzi</i> | 77  | 263 | 339 |

|                        |                 |     |     |      |
|------------------------|-----------------|-----|-----|------|
| Tc00.1047053507091.60  | <i>T. cruzi</i> | 43  | 415 | 457  |
| Tc00.1047053507091.60  | <i>T. cruzi</i> | 185 | 720 | 904  |
| Tc00.1047053507091.80  | <i>T. cruzi</i> | 396 | 58  | 453  |
| Tc00.1047053507093.10  | <i>T. cruzi</i> | 43  | 128 | 170  |
| Tc00.1047053507093.10  | <i>T. cruzi</i> | 91  | 180 | 270  |
| Tc00.1047053507093.10  | <i>T. cruzi</i> | 85  | 532 | 616  |
| Tc00.1047053507093.120 | <i>T. cruzi</i> | 49  | 1   | 49   |
| Tc00.1047053507093.120 | <i>T. cruzi</i> | 51  | 125 | 175  |
| Tc00.1047053507093.120 | <i>T. cruzi</i> | 51  | 125 | 175  |
| Tc00.1047053507093.130 | <i>T. cruzi</i> | 62  | 120 | 181  |
| Tc00.1047053507093.130 | <i>T. cruzi</i> | 48  | 186 | 233  |
| Tc00.1047053507093.130 | <i>T. cruzi</i> | 135 | 343 | 477  |
| Tc00.1047053507093.130 | <i>T. cruzi</i> | 157 | 511 | 667  |
| Tc00.1047053507093.160 | <i>T. cruzi</i> | 193 | 1   | 193  |
| Tc00.1047053507093.160 | <i>T. cruzi</i> | 85  | 339 | 423  |
| Tc00.1047053507093.160 | <i>T. cruzi</i> | 119 | 589 | 707  |
| Tc00.1047053507093.170 | <i>T. cruzi</i> | 43  | 131 | 173  |
| Tc00.1047053507093.180 | <i>T. cruzi</i> | 61  | 260 | 320  |
| Tc00.1047053507093.180 | <i>T. cruzi</i> | 47  | 355 | 401  |
| Tc00.1047053507093.180 | <i>T. cruzi</i> | 57  | 509 | 565  |
| Tc00.1047053507093.184 | <i>T. cruzi</i> | 41  | 68  | 108  |
| Tc00.1047053507093.20  | <i>T. cruzi</i> | 70  | 1   | 70   |
| Tc00.1047053507093.210 | <i>T. cruzi</i> | 93  | 1   | 93   |
| Tc00.1047053507093.210 | <i>T. cruzi</i> | 242 | 991 | 1232 |
| Tc00.1047053507093.220 | <i>T. cruzi</i> | 42  | 1   | 42   |
| Tc00.1047053507093.220 | <i>T. cruzi</i> | 82  | 143 | 224  |
| Tc00.1047053507093.229 | <i>T. cruzi</i> | 42  | 125 | 166  |
| Tc00.1047053507093.250 | <i>T. cruzi</i> | 70  | 1   | 70   |
| Tc00.1047053507093.280 | <i>T. cruzi</i> | 52  | 1   | 52   |
| Tc00.1047053507093.30  | <i>T. cruzi</i> | 77  | 1   | 77   |
| Tc00.1047053507093.300 | <i>T. cruzi</i> | 196 | 78  | 273  |
| Tc00.1047053507093.310 | <i>T. cruzi</i> | 108 | 1   | 108  |
| Tc00.1047053507093.320 | <i>T. cruzi</i> | 41  | 108 | 148  |
| Tc00.1047053507093.339 | <i>T. cruzi</i> | 56  | 19  | 74   |
| Tc00.1047053507093.339 | <i>T. cruzi</i> | 46  | 165 | 210  |
| Tc00.1047053507093.339 | <i>T. cruzi</i> | 46  | 165 | 210  |
| Tc00.1047053507093.40  | <i>T. cruzi</i> | 172 | 325 | 496  |
| Tc00.1047053507093.40  | <i>T. cruzi</i> | 132 | 507 | 638  |
| Tc00.1047053507093.40  | <i>T. cruzi</i> | 245 | 653 | 897  |
| Tc00.1047053507093.50  | <i>T. cruzi</i> | 76  | 288 | 363  |
| Tc00.1047053507093.50  | <i>T. cruzi</i> | 142 | 450 | 591  |
| Tc00.1047053507093.50  | <i>T. cruzi</i> | 72  | 669 | 740  |
| Tc00.1047053507093.50  | <i>T. cruzi</i> | 53  | 759 | 811  |
| Tc00.1047053507093.50  | <i>T. cruzi</i> | 109 | 866 | 974  |
| Tc00.1047053507093.60  | <i>T. cruzi</i> | 58  | 122 | 179  |
| Tc00.1047053507093.60  | <i>T. cruzi</i> | 140 | 247 | 386  |
| Tc00.1047053507093.60  | <i>T. cruzi</i> | 103 | 593 | 695  |



|                        |                 |     |      |      |
|------------------------|-----------------|-----|------|------|
| Tc00.1047053507093.63  | <i>T. cruzi</i> | 132 | 329  | 460  |
| Tc00.1047053507093.69  | <i>T. cruzi</i> | 52  | 1    | 52   |
| Tc00.1047053507093.72  | <i>T. cruzi</i> | 109 | 239  | 347  |
| Tc00.1047053507093.72  | <i>T. cruzi</i> | 89  | 589  | 677  |
| Tc00.1047053507093.72  | <i>T. cruzi</i> | 69  | 733  | 801  |
| Tc00.1047053507093.80  | <i>T. cruzi</i> | 70  | 1    | 70   |
| Tc00.1047053507093.80  | <i>T. cruzi</i> | 91  | 104  | 194  |
| Tc00.1047053507093.80  | <i>T. cruzi</i> | 126 | 214  | 339  |
| Tc00.1047053507093.80  | <i>T. cruzi</i> | 71  | 362  | 432  |
| Tc00.1047053507093.80  | <i>T. cruzi</i> | 210 | 434  | 643  |
| Tc00.1047053507099.10  | <i>T. cruzi</i> | 54  | 132  | 185  |
| Tc00.1047053507099.10  | <i>T. cruzi</i> | 187 | 270  | 456  |
| Tc00.1047053507099.10  | <i>T. cruzi</i> | 56  | 505  | 560  |
| Tc00.1047053507099.10  | <i>T. cruzi</i> | 54  | 892  | 945  |
| Tc00.1047053507099.100 | <i>T. cruzi</i> | 88  | 125  | 212  |
| Tc00.1047053507099.110 | <i>T. cruzi</i> | 145 | 1    | 145  |
| Tc00.1047053507099.110 | <i>T. cruzi</i> | 358 | 175  | 532  |
| Tc00.1047053507099.20  | <i>T. cruzi</i> | 85  | 438  | 522  |
| Tc00.1047053507099.40  | <i>T. cruzi</i> | 40  | 1069 | 1108 |
| Tc00.1047053507099.40  | <i>T. cruzi</i> | 57  | 1372 | 1428 |
| Tc00.1047053507099.40  | <i>T. cruzi</i> | 68  | 1997 | 2064 |
| Tc00.1047053507099.40  | <i>T. cruzi</i> | 99  | 2498 | 2596 |
| Tc00.1047053507099.40  | <i>T. cruzi</i> | 60  | 2765 | 2824 |
| Tc00.1047053507099.40  | <i>T. cruzi</i> | 42  | 4296 | 4337 |
| Tc00.1047053507099.50  | <i>T. cruzi</i> | 66  | 1    | 66   |
| Tc00.1047053507099.60  | <i>T. cruzi</i> | 127 | 49   | 175  |
| Tc00.1047053507099.70  | <i>T. cruzi</i> | 103 | 17   | 119  |
| Tc00.1047053507099.80  | <i>T. cruzi</i> | 97  | 1    | 97   |
| Tc00.1047053507099.80  | <i>T. cruzi</i> | 41  | 1011 | 1051 |
| Tc00.1047053507099.80  | <i>T. cruzi</i> | 46  | 1473 | 1518 |
| Tc00.1047053507099.90  | <i>T. cruzi</i> | 88  | 33   | 120  |
| Tc00.1047053507099.90  | <i>T. cruzi</i> | 206 | 197  | 402  |
| Tc00.1047053507099.90  | <i>T. cruzi</i> | 40  | 442  | 481  |
| Tc00.1047053507101.10  | <i>T. cruzi</i> | 64  | 1    | 64   |
| Tc00.1047053507105.10  | <i>T. cruzi</i> | 103 | 786  | 888  |
| Tc00.1047053507105.20  | <i>T. cruzi</i> | 59  | 58   | 116  |
| Tc00.1047053507105.40  | <i>T. cruzi</i> | 76  | 1    | 76   |
| Tc00.1047053507105.50  | <i>T. cruzi</i> | 159 | 1    | 159  |
| Tc00.1047053507105.60  | <i>T. cruzi</i> | 382 | 13   | 394  |
| Tc00.1047053507105.80  | <i>T. cruzi</i> | 50  | 258  | 307  |
| Tc00.1047053507107.40  | <i>T. cruzi</i> | 92  | 12   | 103  |
| Tc00.1047053507121.11  | <i>T. cruzi</i> | 43  | 1    | 43   |
| Tc00.1047053507121.20  | <i>T. cruzi</i> | 44  | 1    | 44   |
| Tc00.1047053507121.20  | <i>T. cruzi</i> | 78  | 707  | 784  |
| Tc00.1047053507121.40  | <i>T. cruzi</i> | 52  | 317  | 368  |
| Tc00.1047053507143.20  | <i>T. cruzi</i> | 48  | 43   | 90   |
| Tc00.1047053507143.30  | <i>T. cruzi</i> | 77  | 1    | 77   |

|                       |                 |     |      |      |
|-----------------------|-----------------|-----|------|------|
| Tc00.1047053507143.30 | <i>T. cruzi</i> | 192 | 87   | 278  |
| Tc00.1047053507143.30 | <i>T. cruzi</i> | 51  | 338  | 388  |
| Tc00.1047053507143.30 | <i>T. cruzi</i> | 77  | 572  | 648  |
| Tc00.1047053507143.30 | <i>T. cruzi</i> | 252 | 730  | 981  |
| Tc00.1047053507143.30 | <i>T. cruzi</i> | 99  | 1029 | 1127 |
| Tc00.1047053507143.30 | <i>T. cruzi</i> | 73  | 1181 | 1253 |
| Tc00.1047053507143.40 | <i>T. cruzi</i> | 195 | 107  | 301  |
| Tc00.1047053507143.40 | <i>T. cruzi</i> | 156 | 382  | 537  |
| Tc00.1047053507143.40 | <i>T. cruzi</i> | 128 | 566  | 693  |
| Tc00.1047053507143.50 | <i>T. cruzi</i> | 101 | 193  | 293  |
| Tc00.1047053507143.60 | <i>T. cruzi</i> | 268 | 1    | 268  |
| Tc00.1047053507143.60 | <i>T. cruzi</i> | 127 | 272  | 398  |
| Tc00.1047053507143.60 | <i>T. cruzi</i> | 95  | 400  | 494  |
| Tc00.1047053507143.70 | <i>T. cruzi</i> | 71  | 44   | 114  |
| Tc00.1047053507143.70 | <i>T. cruzi</i> | 60  | 609  | 668  |
| Tc00.1047053507143.70 | <i>T. cruzi</i> | 60  | 609  | 668  |
| Tc00.1047053507143.80 | <i>T. cruzi</i> | 60  | 1    | 60   |
| Tc00.1047053507143.80 | <i>T. cruzi</i> | 102 | 108  | 209  |
| Tc00.1047053507143.90 | <i>T. cruzi</i> | 46  | 1    | 46   |
| Tc00.1047053507143.90 | <i>T. cruzi</i> | 99  | 78   | 176  |
| Tc00.1047053507143.90 | <i>T. cruzi</i> | 51  | 211  | 261  |
| Tc00.1047053507145.60 | <i>T. cruzi</i> | 50  | 1    | 50   |
| Tc00.1047053507145.60 | <i>T. cruzi</i> | 74  | 728  | 801  |
| Tc00.1047053507145.60 | <i>T. cruzi</i> | 74  | 728  | 801  |
| Tc00.1047053507145.79 | <i>T. cruzi</i> | 169 | 1    | 169  |
| Tc00.1047053507145.88 | <i>T. cruzi</i> | 169 | 1    | 169  |
| Tc00.1047053507145.98 | <i>T. cruzi</i> | 112 | 1    | 112  |
| Tc00.1047053507163.11 | <i>T. cruzi</i> | 140 | 24   | 163  |
| Tc00.1047053507163.30 | <i>T. cruzi</i> | 207 | 108  | 314  |
| Tc00.1047053507163.40 | <i>T. cruzi</i> | 243 | 29   | 271  |
| Tc00.1047053507163.50 | <i>T. cruzi</i> | 147 | 24   | 170  |
| Tc00.1047053507163.70 | <i>T. cruzi</i> | 47  | 1    | 47   |
| Tc00.1047053507163.70 | <i>T. cruzi</i> | 43  | 408  | 450  |
| Tc00.1047053507163.70 | <i>T. cruzi</i> | 190 | 705  | 894  |
| Tc00.1047053507163.80 | <i>T. cruzi</i> | 42  | 69   | 110  |
| Tc00.1047053507163.80 | <i>T. cruzi</i> | 44  | 129  | 172  |
| Tc00.1047053507163.80 | <i>T. cruzi</i> | 44  | 129  | 172  |
| Tc00.1047053507165.20 | <i>T. cruzi</i> | 61  | 61   | 121  |
| Tc00.1047053507165.40 | <i>T. cruzi</i> | 50  | 1    | 50   |
| Tc00.1047053507165.40 | <i>T. cruzi</i> | 78  | 254  | 331  |
| Tc00.1047053507165.40 | <i>T. cruzi</i> | 78  | 254  | 331  |
| Tc00.1047053507179.20 | <i>T. cruzi</i> | 46  | 247  | 292  |
| Tc00.1047053507179.20 | <i>T. cruzi</i> | 46  | 1623 | 1668 |
| Tc00.1047053507179.20 | <i>T. cruzi</i> | 69  | 2856 | 2924 |
| Tc00.1047053507179.20 | <i>T. cruzi</i> | 82  | 3400 | 3481 |
| Tc00.1047053507213.30 | <i>T. cruzi</i> | 54  | 244  | 297  |
| Tc00.1047053507213.40 | <i>T. cruzi</i> | 40  | 1    | 40   |

|                        |                 |     |      |      |
|------------------------|-----------------|-----|------|------|
| Tc00.1047053507237.10  | <i>T. cruzi</i> | 50  | 1    | 50   |
| Tc00.1047053507237.100 | <i>T. cruzi</i> | 213 | 88   | 300  |
| Tc00.1047053507237.120 | <i>T. cruzi</i> | 353 | 29   | 381  |
| Tc00.1047053507237.150 | <i>T. cruzi</i> | 46  | 1    | 46   |
| Tc00.1047053507237.150 | <i>T. cruzi</i> | 65  | 68   | 132  |
| Tc00.1047053507237.160 | <i>T. cruzi</i> | 158 | 12   | 169  |
| Tc00.1047053507237.170 | <i>T. cruzi</i> | 208 | 93   | 300  |
| Tc00.1047053507237.180 | <i>T. cruzi</i> | 125 | 32   | 156  |
| Tc00.1047053507237.180 | <i>T. cruzi</i> | 77  | 176  | 252  |
| Tc00.1047053507237.190 | <i>T. cruzi</i> | 333 | 58   | 390  |
| Tc00.1047053507237.20  | <i>T. cruzi</i> | 244 | 29   | 272  |
| Tc00.1047053507237.210 | <i>T. cruzi</i> | 171 | 1    | 171  |
| Tc00.1047053507237.220 | <i>T. cruzi</i> | 235 | 41   | 275  |
| Tc00.1047053507237.260 | <i>T. cruzi</i> | 162 | 12   | 173  |
| Tc00.1047053507237.270 | <i>T. cruzi</i> | 250 | 25   | 274  |
| Tc00.1047053507237.280 | <i>T. cruzi</i> | 162 | 26   | 187  |
| Tc00.1047053507237.30  | <i>T. cruzi</i> | 57  | 1    | 57   |
| Tc00.1047053507237.320 | <i>T. cruzi</i> | 51  | 114  | 164  |
| Tc00.1047053507237.340 | <i>T. cruzi</i> | 300 | 49   | 348  |
| Tc00.1047053507237.350 | <i>T. cruzi</i> | 135 | 30   | 164  |
| Tc00.1047053507237.40  | <i>T. cruzi</i> | 61  | 1    | 61   |
| Tc00.1047053507237.40  | <i>T. cruzi</i> | 42  | 99   | 140  |
| Tc00.1047053507237.40  | <i>T. cruzi</i> | 42  | 99   | 140  |
| Tc00.1047053507237.70  | <i>T. cruzi</i> | 162 | 26   | 187  |
| Tc00.1047053507237.80  | <i>T. cruzi</i> | 244 | 30   | 273  |
| Tc00.1047053507237.89  | <i>T. cruzi</i> | 174 | 1    | 174  |
| Tc00.1047053507243.9   | <i>T. cruzi</i> | 45  | 222  | 266  |
| Tc00.1047053507257.110 | <i>T. cruzi</i> | 53  | 96   | 148  |
| Tc00.1047053507257.120 | <i>T. cruzi</i> | 62  | 140  | 201  |
| Tc00.1047053507257.130 | <i>T. cruzi</i> | 75  | 210  | 284  |
| Tc00.1047053507257.160 | <i>T. cruzi</i> | 84  | 21   | 104  |
| Tc00.1047053507257.170 | <i>T. cruzi</i> | 206 | 77   | 282  |
| Tc00.1047053507257.170 | <i>T. cruzi</i> | 42  | 323  | 364  |
| Tc00.1047053507257.170 | <i>T. cruzi</i> | 42  | 323  | 364  |
| Tc00.1047053507257.180 | <i>T. cruzi</i> | 90  | 238  | 327  |
| Tc00.1047053507257.20  | <i>T. cruzi</i> | 44  | 219  | 262  |
| Tc00.1047053507257.40  | <i>T. cruzi</i> | 80  | 10   | 89   |
| Tc00.1047053507257.50  | <i>T. cruzi</i> | 71  | 177  | 247  |
| Tc00.1047053507257.50  | <i>T. cruzi</i> | 52  | 305  | 356  |
| Tc00.1047053507257.50  | <i>T. cruzi</i> | 65  | 428  | 492  |
| Tc00.1047053507257.50  | <i>T. cruzi</i> | 52  | 546  | 597  |
| Tc00.1047053507257.50  | <i>T. cruzi</i> | 65  | 669  | 733  |
| Tc00.1047053507257.50  | <i>T. cruzi</i> | 52  | 787  | 838  |
| Tc00.1047053507257.50  | <i>T. cruzi</i> | 65  | 910  | 974  |
| Tc00.1047053507257.50  | <i>T. cruzi</i> | 58  | 1340 | 1397 |
| Tc00.1047053507257.50  | <i>T. cruzi</i> | 84  | 1407 | 1490 |
| Tc00.1047053507257.50  | <i>T. cruzi</i> | 64  | 1584 | 1647 |

|                        |                 |     |      |      |
|------------------------|-----------------|-----|------|------|
| Tc00.1047053507257.50  | <i>T. cruzi</i> | 102 | 1809 | 1910 |
| Tc00.1047053507257.70  | <i>T. cruzi</i> | 47  | 1    | 47   |
| Tc00.1047053507257.90  | <i>T. cruzi</i> | 53  | 1    | 53   |
| Tc00.1047053507275.30  | <i>T. cruzi</i> | 47  | 176  | 222  |
| Tc00.1047053507275.30  | <i>T. cruzi</i> | 54  | 332  | 385  |
| Tc00.1047053507275.30  | <i>T. cruzi</i> | 54  | 332  | 385  |
| Tc00.1047053507275.40  | <i>T. cruzi</i> | 45  | 1    | 45   |
| Tc00.1047053507275.40  | <i>T. cruzi</i> | 140 | 58   | 197  |
| Tc00.1047053507275.50  | <i>T. cruzi</i> | 122 | 1    | 122  |
| Tc00.1047053507275.50  | <i>T. cruzi</i> | 133 | 145  | 277  |
| Tc00.1047053507275.50  | <i>T. cruzi</i> | 103 | 279  | 381  |
| Tc00.1047053507277.10  | <i>T. cruzi</i> | 255 | 237  | 491  |
| Tc00.1047053507277.20  | <i>T. cruzi</i> | 42  | 66   | 107  |
| Tc00.1047053507277.20  | <i>T. cruzi</i> | 103 | 137  | 239  |
| Tc00.1047053507277.20  | <i>T. cruzi</i> | 51  | 500  | 550  |
| Tc00.1047053507277.30  | <i>T. cruzi</i> | 67  | 187  | 253  |
| Tc00.1047053507283.10  | <i>T. cruzi</i> | 51  | 1    | 51   |
| Tc00.1047053507283.10  | <i>T. cruzi</i> | 48  | 134  | 181  |
| Tc00.1047053507283.10  | <i>T. cruzi</i> | 69  | 281  | 349  |
| Tc00.1047053507389.20  | <i>T. cruzi</i> | 56  | 27   | 82   |
| Tc00.1047053507389.20  | <i>T. cruzi</i> | 48  | 92   | 139  |
| Tc00.1047053507389.20  | <i>T. cruzi</i> | 48  | 92   | 139  |
| Tc00.1047053507389.60  | <i>T. cruzi</i> | 53  | 157  | 209  |
| Tc00.1047053507389.70  | <i>T. cruzi</i> | 61  | 438  | 498  |
| Tc00.1047053507389.70  | <i>T. cruzi</i> | 45  | 991  | 1035 |
| Tc00.1047053507395.14  | <i>T. cruzi</i> | 43  | 67   | 109  |
| Tc00.1047053507395.14  | <i>T. cruzi</i> | 55  | 182  | 236  |
| Tc00.1047053507395.14  | <i>T. cruzi</i> | 55  | 182  | 236  |
| Tc00.1047053507395.20  | <i>T. cruzi</i> | 51  | 58   | 108  |
| Tc00.1047053507395.30  | <i>T. cruzi</i> | 101 | 41   | 141  |
| Tc00.1047053507395.30  | <i>T. cruzi</i> | 125 | 147  | 271  |
| Tc00.1047053507395.30  | <i>T. cruzi</i> | 105 | 331  | 435  |
| Tc00.1047053507429.20  | <i>T. cruzi</i> | 440 | 73   | 512  |
| Tc00.1047053507429.30  | <i>T. cruzi</i> | 264 | 12   | 275  |
| Tc00.1047053507429.49  | <i>T. cruzi</i> | 160 | 26   | 185  |
| Tc00.1047053507429.60  | <i>T. cruzi</i> | 63  | 1    | 63   |
| Tc00.1047053507429.70  | <i>T. cruzi</i> | 274 | 25   | 298  |
| Tc00.1047053507433.9   | <i>T. cruzi</i> | 51  | 31   | 81   |
| Tc00.1047053507433.9   | <i>T. cruzi</i> | 160 | 88   | 247  |
| Tc00.1047053507433.9   | <i>T. cruzi</i> | 70  | 289  | 358  |
| Tc00.1047053507433.9   | <i>T. cruzi</i> | 208 | 913  | 1120 |
| Tc00.1047053507433.9   | <i>T. cruzi</i> | 123 | 1188 | 1310 |
| Tc00.1047053507447.10  | <i>T. cruzi</i> | 100 | 56   | 155  |
| Tc00.1047053507447.19  | <i>T. cruzi</i> | 738 | 1    | 738  |
| Tc00.1047053507467.100 | <i>T. cruzi</i> | 76  | 291  | 366  |
| Tc00.1047053507467.100 | <i>T. cruzi</i> | 89  | 404  | 492  |
| Tc00.1047053507467.100 | <i>T. cruzi</i> | 51  | 507  | 557  |

|                        |                 |     |      |      |
|------------------------|-----------------|-----|------|------|
| Tc00.1047053507467.110 | <i>T. cruzi</i> | 45  | 293  | 337  |
| Tc00.1047053507467.20  | <i>T. cruzi</i> | 165 | 32   | 196  |
| Tc00.1047053507467.50  | <i>T. cruzi</i> | 115 | 215  | 329  |
| Tc00.1047053507467.70  | <i>T. cruzi</i> | 56  | 625  | 680  |
| Tc00.1047053507467.90  | <i>T. cruzi</i> | 41  | 1    | 41   |
| Tc00.1047053507467.90  | <i>T. cruzi</i> | 48  | 705  | 752  |
| Tc00.1047053507467.90  | <i>T. cruzi</i> | 89  | 967  | 1055 |
| Tc00.1047053507467.94  | <i>T. cruzi</i> | 56  | 78   | 133  |
| Tc00.1047053507477.10  | <i>T. cruzi</i> | 55  | 1603 | 1657 |
| Tc00.1047053507477.10  | <i>T. cruzi</i> | 70  | 2842 | 2911 |
| Tc00.1047053507477.10  | <i>T. cruzi</i> | 88  | 3387 | 3474 |
| Tc00.1047053507479.20  | <i>T. cruzi</i> | 46  | 1    | 46   |
| Tc00.1047053507479.20  | <i>T. cruzi</i> | 61  | 641  | 701  |
| Tc00.1047053507479.20  | <i>T. cruzi</i> | 80  | 712  | 791  |
| Tc00.1047053507479.51  | <i>T. cruzi</i> | 57  | 106  | 162  |
| Tc00.1047053507479.70  | <i>T. cruzi</i> | 43  | 1    | 43   |
| Tc00.1047053507479.70  | <i>T. cruzi</i> | 245 | 682  | 926  |
| Tc00.1047053507483.30  | <i>T. cruzi</i> | 123 | 25   | 147  |
| Tc00.1047053507483.39  | <i>T. cruzi</i> | 89  | 1    | 89   |
| Tc00.1047053507483.50  | <i>T. cruzi</i> | 89  | 1    | 89   |
| Tc00.1047053507483.60  | <i>T. cruzi</i> | 54  | 268  | 321  |
| Tc00.1047053507483.60  | <i>T. cruzi</i> | 41  | 358  | 398  |
| Tc00.1047053507483.60  | <i>T. cruzi</i> | 281 | 700  | 980  |
| Tc00.1047053507483.80  | <i>T. cruzi</i> | 50  | 521  | 570  |
| Tc00.1047053507485.110 | <i>T. cruzi</i> | 44  | 119  | 162  |
| Tc00.1047053507485.110 | <i>T. cruzi</i> | 55  | 498  | 552  |
| Tc00.1047053507485.15  | <i>T. cruzi</i> | 57  | 1    | 57   |
| Tc00.1047053507485.34  | <i>T. cruzi</i> | 57  | 1    | 57   |
| Tc00.1047053507485.50  | <i>T. cruzi</i> | 106 | 17   | 122  |
| Tc00.1047053507485.50  | <i>T. cruzi</i> | 44  | 147  | 190  |
| Tc00.1047053507485.50  | <i>T. cruzi</i> | 333 | 258  | 590  |
| Tc00.1047053507485.70  | <i>T. cruzi</i> | 164 | 32   | 195  |
| Tc00.1047053507485.70  | <i>T. cruzi</i> | 75  | 339  | 413  |
| Tc00.1047053507485.90  | <i>T. cruzi</i> | 154 | 1    | 154  |
| Tc00.1047053507507.20  | <i>T. cruzi</i> | 59  | 127  | 185  |
| Tc00.1047053507507.20  | <i>T. cruzi</i> | 67  | 241  | 307  |
| Tc00.1047053507507.30  | <i>T. cruzi</i> | 47  | 379  | 425  |
| Tc00.1047053507507.40  | <i>T. cruzi</i> | 47  | 1    | 47   |
| Tc00.1047053507509.50  | <i>T. cruzi</i> | 57  | 1    | 57   |
| Tc00.1047053507509.70  | <i>T. cruzi</i> | 165 | 98   | 262  |
| Tc00.1047053507509.70  | <i>T. cruzi</i> | 69  | 274  | 342  |
| Tc00.1047053507509.70  | <i>T. cruzi</i> | 137 | 406  | 542  |
| Tc00.1047053507509.80  | <i>T. cruzi</i> | 72  | 1    | 72   |
| Tc00.1047053507509.89  | <i>T. cruzi</i> | 49  | 174  | 222  |
| Tc00.1047053507511.20  | <i>T. cruzi</i> | 51  | 35   | 85   |
| Tc00.1047053507511.20  | <i>T. cruzi</i> | 44  | 139  | 182  |
| Tc00.1047053507511.20  | <i>T. cruzi</i> | 44  | 139  | 182  |

|                        |                 |     |      |      |
|------------------------|-----------------|-----|------|------|
| Tc00.1047053507511.40  | <i>T. cruzi</i> | 110 | 1    | 110  |
| Tc00.1047053507511.50  | <i>T. cruzi</i> | 78  | 29   | 106  |
| Tc00.1047053507511.60  | <i>T. cruzi</i> | 46  | 88   | 133  |
| Tc00.1047053507521.10  | <i>T. cruzi</i> | 102 | 232  | 333  |
| Tc00.1047053507521.100 | <i>T. cruzi</i> | 193 | 36   | 228  |
| Tc00.1047053507521.100 | <i>T. cruzi</i> | 46  | 240  | 285  |
| Tc00.1047053507521.100 | <i>T. cruzi</i> | 46  | 240  | 285  |
| Tc00.1047053507521.110 | <i>T. cruzi</i> | 60  | 31   | 90   |
| Tc00.1047053507521.115 | <i>T. cruzi</i> | 62  | 147  | 208  |
| Tc00.1047053507521.130 | <i>T. cruzi</i> | 41  | 119  | 159  |
| Tc00.1047053507521.130 | <i>T. cruzi</i> | 49  | 182  | 230  |
| Tc00.1047053507521.130 | <i>T. cruzi</i> | 41  | 263  | 303  |
| Tc00.1047053507521.130 | <i>T. cruzi</i> | 46  | 326  | 371  |
| Tc00.1047053507521.130 | <i>T. cruzi</i> | 64  | 579  | 642  |
| Tc00.1047053507521.130 | <i>T. cruzi</i> | 71  | 687  | 757  |
| Tc00.1047053507521.130 | <i>T. cruzi</i> | 96  | 951  | 1046 |
| Tc00.1047053507521.140 | <i>T. cruzi</i> | 52  | 60   | 111  |
| Tc00.1047053507521.140 | <i>T. cruzi</i> | 143 | 140  | 282  |
| Tc00.1047053507521.140 | <i>T. cruzi</i> | 58  | 334  | 391  |
| Tc00.1047053507521.150 | <i>T. cruzi</i> | 42  | 246  | 287  |
| Tc00.1047053507521.150 | <i>T. cruzi</i> | 54  | 1614 | 1667 |
| Tc00.1047053507521.150 | <i>T. cruzi</i> | 69  | 2855 | 2923 |
| Tc00.1047053507521.150 | <i>T. cruzi</i> | 83  | 3399 | 3481 |
| Tc00.1047053507521.20  | <i>T. cruzi</i> | 104 | 392  | 495  |
| Tc00.1047053507521.80  | <i>T. cruzi</i> | 85  | 160  | 244  |
| Tc00.1047053507527.10  | <i>T. cruzi</i> | 95  | 268  | 362  |
| Tc00.1047053507527.20  | <i>T. cruzi</i> | 356 | 115  | 470  |
| Tc00.1047053507527.20  | <i>T. cruzi</i> | 101 | 499  | 599  |
| Tc00.1047053507527.20  | <i>T. cruzi</i> | 149 | 619  | 767  |
| Tc00.1047053507527.20  | <i>T. cruzi</i> | 104 | 801  | 904  |
| Tc00.1047053507527.20  | <i>T. cruzi</i> | 61  | 933  | 993  |
| Tc00.1047053507527.30  | <i>T. cruzi</i> | 67  | 695  | 761  |
| Tc00.1047053507527.50  | <i>T. cruzi</i> | 46  | 1    | 46   |
| Tc00.1047053507529.10  | <i>T. cruzi</i> | 116 | 52   | 167  |
| Tc00.1047053507529.20  | <i>T. cruzi</i> | 55  | 1    | 55   |
| Tc00.1047053507529.20  | <i>T. cruzi</i> | 135 | 349  | 483  |
| Tc00.1047053507529.40  | <i>T. cruzi</i> | 79  | 218  | 296  |
| Tc00.1047053507529.50  | <i>T. cruzi</i> | 95  | 44   | 138  |
| Tc00.1047053507529.50  | <i>T. cruzi</i> | 67  | 236  | 302  |
| Tc00.1047053507531.19  | <i>T. cruzi</i> | 59  | 28   | 86   |
| Tc00.1047053507537.30  | <i>T. cruzi</i> | 63  | 145  | 207  |
| Tc00.1047053507537.30  | <i>T. cruzi</i> | 125 | 661  | 785  |
| Tc00.1047053507537.30  | <i>T. cruzi</i> | 125 | 661  | 785  |
| Tc00.1047053507547.18  | <i>T. cruzi</i> | 98  | 15   | 112  |
| Tc00.1047053507547.50  | <i>T. cruzi</i> | 66  | 246  | 311  |
| Tc00.1047053507547.50  | <i>T. cruzi</i> | 46  | 607  | 652  |
| Tc00.1047053507547.50  | <i>T. cruzi</i> | 46  | 607  | 652  |

|                        |                 |     |     |      |
|------------------------|-----------------|-----|-----|------|
| Tc00.1047053507547.70  | <i>T. cruzi</i> | 58  | 1   | 58   |
| Tc00.1047053507547.70  | <i>T. cruzi</i> | 112 | 97  | 208  |
| Tc00.1047053507547.70  | <i>T. cruzi</i> | 119 | 428 | 546  |
| Tc00.1047053507547.70  | <i>T. cruzi</i> | 44  | 615 | 658  |
| Tc00.1047053507547.70  | <i>T. cruzi</i> | 67  | 715 | 781  |
| Tc00.1047053507547.80  | <i>T. cruzi</i> | 67  | 416 | 482  |
| Tc00.1047053507547.80  | <i>T. cruzi</i> | 111 | 495 | 605  |
| Tc00.1047053507547.80  | <i>T. cruzi</i> | 92  | 631 | 722  |
| Tc00.1047053507547.80  | <i>T. cruzi</i> | 83  | 755 | 837  |
| Tc00.1047053507547.80  | <i>T. cruzi</i> | 148 | 867 | 1014 |
| Tc00.1047053507547.9   | <i>T. cruzi</i> | 97  | 13  | 109  |
| Tc00.1047053507555.50  | <i>T. cruzi</i> | 52  | 711 | 762  |
| Tc00.1047053507555.50  | <i>T. cruzi</i> | 225 | 779 | 1003 |
| Tc00.1047053507555.80  | <i>T. cruzi</i> | 47  | 1   | 47   |
| Tc00.1047053507555.80  | <i>T. cruzi</i> | 43  | 340 | 382  |
| Tc00.1047053507555.80  | <i>T. cruzi</i> | 43  | 340 | 382  |
| Tc00.1047053507559.100 | <i>T. cruzi</i> | 123 | 1   | 123  |
| Tc00.1047053507559.100 | <i>T. cruzi</i> | 216 | 161 | 376  |
| Tc00.1047053507559.100 | <i>T. cruzi</i> | 59  | 424 | 482  |
| Tc00.1047053507559.100 | <i>T. cruzi</i> | 131 | 486 | 616  |
| Tc00.1047053507559.110 | <i>T. cruzi</i> | 140 | 242 | 381  |
| Tc00.1047053507559.30  | <i>T. cruzi</i> | 53  | 107 | 159  |
| Tc00.1047053507559.40  | <i>T. cruzi</i> | 60  | 1   | 60   |
| Tc00.1047053507559.40  | <i>T. cruzi</i> | 136 | 82  | 217  |
| Tc00.1047053507559.50  | <i>T. cruzi</i> | 138 | 329 | 466  |
| Tc00.1047053507559.50  | <i>T. cruzi</i> | 47  | 468 | 514  |
| Tc00.1047053507559.60  | <i>T. cruzi</i> | 96  | 1   | 96   |
| Tc00.1047053507559.60  | <i>T. cruzi</i> | 103 | 98  | 200  |
| Tc00.1047053507559.60  | <i>T. cruzi</i> | 110 | 260 | 369  |
| Tc00.1047053507559.60  | <i>T. cruzi</i> | 58  | 393 | 450  |
| Tc00.1047053507559.60  | <i>T. cruzi</i> | 40  | 528 | 567  |
| Tc00.1047053507559.70  | <i>T. cruzi</i> | 81  | 237 | 317  |
| Tc00.1047053507559.90  | <i>T. cruzi</i> | 113 | 1   | 113  |
| Tc00.1047053507559.90  | <i>T. cruzi</i> | 115 | 129 | 243  |
| Tc00.1047053507559.90  | <i>T. cruzi</i> | 102 | 387 | 488  |
| Tc00.1047053507585.10  | <i>T. cruzi</i> | 59  | 1   | 59   |
| Tc00.1047053507603.100 | <i>T. cruzi</i> | 63  | 153 | 215  |
| Tc00.1047053507603.110 | <i>T. cruzi</i> | 65  | 84  | 148  |
| Tc00.1047053507603.110 | <i>T. cruzi</i> | 115 | 151 | 265  |
| Tc00.1047053507603.110 | <i>T. cruzi</i> | 89  | 370 | 458  |
| Tc00.1047053507603.110 | <i>T. cruzi</i> | 127 | 492 | 618  |
| Tc00.1047053507603.110 | <i>T. cruzi</i> | 88  | 659 | 746  |
| Tc00.1047053507603.120 | <i>T. cruzi</i> | 110 | 1   | 110  |
| Tc00.1047053507603.120 | <i>T. cruzi</i> | 107 | 119 | 225  |
| Tc00.1047053507603.120 | <i>T. cruzi</i> | 400 | 290 | 689  |
| Tc00.1047053507603.120 | <i>T. cruzi</i> | 62  | 721 | 782  |
| Tc00.1047053507603.120 | <i>T. cruzi</i> | 389 | 784 | 1172 |

|                        |                 |     |      |      |
|------------------------|-----------------|-----|------|------|
| Tc00.1047053507603.130 | <i>T. cruzi</i> | 116 | 209  | 324  |
| Tc00.1047053507603.140 | <i>T. cruzi</i> | 40  | 138  | 177  |
| Tc00.1047053507603.140 | <i>T. cruzi</i> | 67  | 316  | 382  |
| Tc00.1047053507603.140 | <i>T. cruzi</i> | 104 | 559  | 662  |
| Tc00.1047053507603.150 | <i>T. cruzi</i> | 72  | 318  | 389  |
| Tc00.1047053507603.150 | <i>T. cruzi</i> | 42  | 440  | 481  |
| Tc00.1047053507603.150 | <i>T. cruzi</i> | 42  | 440  | 481  |
| Tc00.1047053507603.160 | <i>T. cruzi</i> | 85  | 42   | 126  |
| Tc00.1047053507603.160 | <i>T. cruzi</i> | 118 | 213  | 330  |
| Tc00.1047053507603.170 | <i>T. cruzi</i> | 42  | 34   | 75   |
| Tc00.1047053507603.170 | <i>T. cruzi</i> | 75  | 164  | 238  |
| Tc00.1047053507603.170 | <i>T. cruzi</i> | 61  | 328  | 388  |
| Tc00.1047053507603.180 | <i>T. cruzi</i> | 78  | 397  | 474  |
| Tc00.1047053507603.180 | <i>T. cruzi</i> | 99  | 628  | 726  |
| Tc00.1047053507603.180 | <i>T. cruzi</i> | 54  | 1080 | 1133 |
| Tc00.1047053507603.190 | <i>T. cruzi</i> | 178 | 1    | 178  |
| Tc00.1047053507603.190 | <i>T. cruzi</i> | 147 | 278  | 424  |
| Tc00.1047053507603.220 | <i>T. cruzi</i> | 68  | 377  | 444  |
| Tc00.1047053507603.240 | <i>T. cruzi</i> | 89  | 36   | 124  |
| Tc00.1047053507603.240 | <i>T. cruzi</i> | 78  | 441  | 518  |
| Tc00.1047053507603.240 | <i>T. cruzi</i> | 44  | 520  | 563  |
| Tc00.1047053507603.240 | <i>T. cruzi</i> | 51  | 612  | 662  |
| Tc00.1047053507603.240 | <i>T. cruzi</i> | 81  | 837  | 917  |
| Tc00.1047053507603.250 | <i>T. cruzi</i> | 42  | 504  | 545  |
| Tc00.1047053507603.260 | <i>T. cruzi</i> | 42  | 327  | 368  |
| Tc00.1047053507603.260 | <i>T. cruzi</i> | 56  | 412  | 467  |
| Tc00.1047053507603.260 | <i>T. cruzi</i> | 56  | 412  | 467  |
| Tc00.1047053507603.270 | <i>T. cruzi</i> | 42  | 327  | 368  |
| Tc00.1047053507603.270 | <i>T. cruzi</i> | 56  | 412  | 467  |
| Tc00.1047053507603.270 | <i>T. cruzi</i> | 56  | 412  | 467  |
| Tc00.1047053507603.60  | <i>T. cruzi</i> | 204 | 103  | 306  |
| Tc00.1047053507603.60  | <i>T. cruzi</i> | 199 | 321  | 519  |
| Tc00.1047053507603.60  | <i>T. cruzi</i> | 199 | 321  | 519  |
| Tc00.1047053507603.90  | <i>T. cruzi</i> | 218 | 1    | 218  |
| Tc00.1047053507603.90  | <i>T. cruzi</i> | 288 | 283  | 570  |
| Tc00.1047053507611.10  | <i>T. cruzi</i> | 78  | 1    | 78   |
| Tc00.1047053507611.10  | <i>T. cruzi</i> | 49  | 171  | 219  |
| Tc00.1047053507611.10  | <i>T. cruzi</i> | 45  | 366  | 410  |
| Tc00.1047053507611.110 | <i>T. cruzi</i> | 46  | 1    | 46   |
| Tc00.1047053507611.110 | <i>T. cruzi</i> | 44  | 480  | 523  |
| Tc00.1047053507611.114 | <i>T. cruzi</i> | 68  | 1    | 68   |
| Tc00.1047053507611.170 | <i>T. cruzi</i> | 43  | 1    | 43   |
| Tc00.1047053507611.170 | <i>T. cruzi</i> | 72  | 684  | 755  |
| Tc00.1047053507611.180 | <i>T. cruzi</i> | 57  | 106  | 162  |
| Tc00.1047053507611.199 | <i>T. cruzi</i> | 58  | 217  | 274  |
| Tc00.1047053507611.199 | <i>T. cruzi</i> | 50  | 1597 | 1646 |
| Tc00.1047053507611.199 | <i>T. cruzi</i> | 67  | 2831 | 2897 |



|                        |                 |     |      |      |
|------------------------|-----------------|-----|------|------|
| Tc00.1047053507611.199 | <i>T. cruzi</i> | 71  | 3388 | 3458 |
| Tc00.1047053507611.310 | <i>T. cruzi</i> | 59  | 1    | 59   |
| Tc00.1047053507611.310 | <i>T. cruzi</i> | 99  | 112  | 210  |
| Tc00.1047053507611.310 | <i>T. cruzi</i> | 99  | 112  | 210  |
| Tc00.1047053507611.340 | <i>T. cruzi</i> | 65  | 1    | 65   |
| Tc00.1047053507611.340 | <i>T. cruzi</i> | 49  | 67   | 115  |
| Tc00.1047053507611.340 | <i>T. cruzi</i> | 102 | 262  | 363  |
| Tc00.1047053507611.380 | <i>T. cruzi</i> | 86  | 37   | 122  |
| Tc00.1047053507611.398 | <i>T. cruzi</i> | 83  | 104  | 186  |
| Tc00.1047053507611.398 | <i>T. cruzi</i> | 247 | 269  | 515  |
| Tc00.1047053507625.10  | <i>T. cruzi</i> | 76  | 1    | 76   |
| Tc00.1047053507625.110 | <i>T. cruzi</i> | 75  | 576  | 650  |
| Tc00.1047053507625.130 | <i>T. cruzi</i> | 77  | 47   | 123  |
| Tc00.1047053507625.130 | <i>T. cruzi</i> | 43  | 217  | 259  |
| Tc00.1047053507625.130 | <i>T. cruzi</i> | 43  | 217  | 259  |
| Tc00.1047053507625.170 | <i>T. cruzi</i> | 133 | 1    | 133  |
| Tc00.1047053507625.170 | <i>T. cruzi</i> | 62  | 586  | 647  |
| Tc00.1047053507625.180 | <i>T. cruzi</i> | 42  | 220  | 261  |
| Tc00.1047053507625.180 | <i>T. cruzi</i> | 40  | 586  | 625  |
| Tc00.1047053507625.180 | <i>T. cruzi</i> | 143 | 637  | 779  |
| Tc00.1047053507625.180 | <i>T. cruzi</i> | 62  | 815  | 876  |
| Tc00.1047053507625.183 | <i>T. cruzi</i> | 47  | 132  | 178  |
| Tc00.1047053507625.70  | <i>T. cruzi</i> | 57  | 1    | 57   |
| Tc00.1047053507625.70  | <i>T. cruzi</i> | 51  | 64   | 114  |
| Tc00.1047053507625.70  | <i>T. cruzi</i> | 58  | 147  | 204  |
| Tc00.1047053507625.99  | <i>T. cruzi</i> | 56  | 227  | 282  |
| Tc00.1047053507627.9   | <i>T. cruzi</i> | 163 | 1    | 163  |
| Tc00.1047053507627.9   | <i>T. cruzi</i> | 52  | 497  | 548  |
| Tc00.1047053507627.9   | <i>T. cruzi</i> | 66  | 560  | 625  |
| Tc00.1047053507627.9   | <i>T. cruzi</i> | 56  | 719  | 774  |
| Tc00.1047053507627.9   | <i>T. cruzi</i> | 95  | 788  | 882  |
| Tc00.1047053507629.10  | <i>T. cruzi</i> | 70  | 61   | 130  |
| Tc00.1047053507629.20  | <i>T. cruzi</i> | 124 | 410  | 533  |
| Tc00.1047053507629.20  | <i>T. cruzi</i> | 48  | 592  | 639  |
| Tc00.1047053507629.20  | <i>T. cruzi</i> | 48  | 592  | 639  |
| Tc00.1047053507629.30  | <i>T. cruzi</i> | 78  | 190  | 267  |
| Tc00.1047053507629.30  | <i>T. cruzi</i> | 110 | 510  | 619  |
| Tc00.1047053507629.30  | <i>T. cruzi</i> | 57  | 647  | 703  |
| Tc00.1047053507629.30  | <i>T. cruzi</i> | 40  | 748  | 787  |
| Tc00.1047053507629.30  | <i>T. cruzi</i> | 109 | 874  | 982  |
| Tc00.1047053507629.39  | <i>T. cruzi</i> | 82  | 1    | 82   |
| Tc00.1047053507629.39  | <i>T. cruzi</i> | 103 | 313  | 415  |
| Tc00.1047053507629.39  | <i>T. cruzi</i> | 197 | 466  | 662  |
| Tc00.1047053507629.39  | <i>T. cruzi</i> | 117 | 721  | 837  |
| Tc00.1047053507639.10  | <i>T. cruzi</i> | 85  | 27   | 111  |
| Tc00.1047053507639.20  | <i>T. cruzi</i> | 193 | 1    | 193  |
| Tc00.1047053507639.30  | <i>T. cruzi</i> | 134 | 1    | 134  |

|                        |                 |     |      |      |
|------------------------|-----------------|-----|------|------|
| Tc00.1047053507639.40  | <i>T. cruzi</i> | 78  | 32   | 109  |
| Tc00.1047053507639.50  | <i>T. cruzi</i> | 270 | 1    | 270  |
| Tc00.1047053507639.50  | <i>T. cruzi</i> | 79  | 599  | 677  |
| Tc00.1047053507639.60  | <i>T. cruzi</i> | 108 | 57   | 164  |
| Tc00.1047053507639.60  | <i>T. cruzi</i> | 42  | 373  | 414  |
| Tc00.1047053507639.60  | <i>T. cruzi</i> | 43  | 458  | 500  |
| Tc00.1047053507639.60  | <i>T. cruzi</i> | 58  | 606  | 663  |
| Tc00.1047053507639.90  | <i>T. cruzi</i> | 91  | 1    | 91   |
| Tc00.1047053507639.90  | <i>T. cruzi</i> | 43  | 117  | 159  |
| Tc00.1047053507639.90  | <i>T. cruzi</i> | 201 | 188  | 388  |
| Tc00.1047053507641.104 | <i>T. cruzi</i> | 72  | 233  | 304  |
| Tc00.1047053507641.104 | <i>T. cruzi</i> | 51  | 319  | 369  |
| Tc00.1047053507641.104 | <i>T. cruzi</i> | 51  | 319  | 369  |
| Tc00.1047053507641.110 | <i>T. cruzi</i> | 324 | 1    | 324  |
| Tc00.1047053507641.120 | <i>T. cruzi</i> | 111 | 1    | 111  |
| Tc00.1047053507641.120 | <i>T. cruzi</i> | 56  | 553  | 608  |
| Tc00.1047053507641.14  | <i>T. cruzi</i> | 82  | 12   | 93   |
| Tc00.1047053507641.140 | <i>T. cruzi</i> | 96  | 416  | 511  |
| Tc00.1047053507641.150 | <i>T. cruzi</i> | 54  | 359  | 412  |
| Tc00.1047053507641.160 | <i>T. cruzi</i> | 41  | 420  | 460  |
| Tc00.1047053507641.160 | <i>T. cruzi</i> | 134 | 648  | 781  |
| Tc00.1047053507641.160 | <i>T. cruzi</i> | 134 | 648  | 781  |
| Tc00.1047053507641.170 | <i>T. cruzi</i> | 41  | 201  | 241  |
| Tc00.1047053507641.170 | <i>T. cruzi</i> | 60  | 538  | 597  |
| Tc00.1047053507641.170 | <i>T. cruzi</i> | 60  | 538  | 597  |
| Tc00.1047053507641.190 | <i>T. cruzi</i> | 78  | 1    | 78   |
| Tc00.1047053507641.190 | <i>T. cruzi</i> | 232 | 1015 | 1246 |
| Tc00.1047053507641.190 | <i>T. cruzi</i> | 162 | 1291 | 1452 |
| Tc00.1047053507641.200 | <i>T. cruzi</i> | 255 | 40   | 294  |
| Tc00.1047053507641.210 | <i>T. cruzi</i> | 307 | 75   | 381  |
| Tc00.1047053507641.230 | <i>T. cruzi</i> | 51  | 445  | 495  |
| Tc00.1047053507641.236 | <i>T. cruzi</i> | 53  | 63   | 115  |
| Tc00.1047053507641.239 | <i>T. cruzi</i> | 64  | 259  | 322  |
| Tc00.1047053507641.280 | <i>T. cruzi</i> | 45  | 253  | 297  |
| Tc00.1047053507641.30  | <i>T. cruzi</i> | 169 | 43   | 211  |
| Tc00.1047053507641.30  | <i>T. cruzi</i> | 95  | 679  | 773  |
| Tc00.1047053507641.40  | <i>T. cruzi</i> | 64  | 165  | 228  |
| Tc00.1047053507641.40  | <i>T. cruzi</i> | 48  | 535  | 582  |
| Tc00.1047053507641.40  | <i>T. cruzi</i> | 45  | 851  | 895  |
| Tc00.1047053507641.70  | <i>T. cruzi</i> | 85  | 122  | 206  |
| Tc00.1047053507641.70  | <i>T. cruzi</i> | 45  | 585  | 629  |
| Tc00.1047053507641.70  | <i>T. cruzi</i> | 45  | 585  | 629  |
| Tc00.1047053507641.80  | <i>T. cruzi</i> | 45  | 368  | 412  |
| Tc00.1047053507641.80  | <i>T. cruzi</i> | 44  | 612  | 655  |
| Tc00.1047053507641.80  | <i>T. cruzi</i> | 101 | 707  | 807  |
| Tc00.1047053507641.90  | <i>T. cruzi</i> | 89  | 1    | 89   |
| Tc00.1047053507641.90  | <i>T. cruzi</i> | 148 | 113  | 260  |

|                        |                 |     |     |      |
|------------------------|-----------------|-----|-----|------|
| Tc00.1047053507641.90  | <i>T. cruzi</i> | 46  | 306 | 351  |
| Tc00.1047053507667.20  | <i>T. cruzi</i> | 61  | 27  | 87   |
| Tc00.1047053507667.20  | <i>T. cruzi</i> | 58  | 170 | 227  |
| Tc00.1047053507667.20  | <i>T. cruzi</i> | 87  | 362 | 448  |
| Tc00.1047053507667.20  | <i>T. cruzi</i> | 90  | 654 | 743  |
| Tc00.1047053507667.20  | <i>T. cruzi</i> | 40  | 795 | 834  |
| Tc00.1047053507667.20  | <i>T. cruzi</i> | 77  | 913 | 989  |
| Tc00.1047053507667.20  | <i>T. cruzi</i> | 45  | 993 | 1037 |
| Tc00.1047053507669.100 | <i>T. cruzi</i> | 85  | 1   | 85   |
| Tc00.1047053507669.100 | <i>T. cruzi</i> | 64  | 160 | 223  |
| Tc00.1047053507669.100 | <i>T. cruzi</i> | 64  | 160 | 223  |
| Tc00.1047053507669.104 | <i>T. cruzi</i> | 80  | 1   | 80   |
| Tc00.1047053507669.104 | <i>T. cruzi</i> | 45  | 110 | 154  |
| Tc00.1047053507669.104 | <i>T. cruzi</i> | 45  | 110 | 154  |
| Tc00.1047053507669.110 | <i>T. cruzi</i> | 87  | 1   | 87   |
| Tc00.1047053507669.110 | <i>T. cruzi</i> | 147 | 646 | 792  |
| Tc00.1047053507669.120 | <i>T. cruzi</i> | 52  | 490 | 541  |
| Tc00.1047053507669.130 | <i>T. cruzi</i> | 60  | 56  | 115  |
| Tc00.1047053507669.139 | <i>T. cruzi</i> | 98  | 52  | 149  |
| Tc00.1047053507669.160 | <i>T. cruzi</i> | 51  | 240 | 290  |
| Tc00.1047053507669.190 | <i>T. cruzi</i> | 134 | 1   | 134  |
| Tc00.1047053507669.190 | <i>T. cruzi</i> | 61  | 174 | 234  |
| Tc00.1047053507669.20  | <i>T. cruzi</i> | 164 | 1   | 164  |
| Tc00.1047053507669.210 | <i>T. cruzi</i> | 51  | 417 | 467  |
| Tc00.1047053507669.220 | <i>T. cruzi</i> | 48  | 15  | 62   |
| Tc00.1047053507669.220 | <i>T. cruzi</i> | 70  | 193 | 262  |
| Tc00.1047053507669.220 | <i>T. cruzi</i> | 54  | 389 | 442  |
| Tc00.1047053507669.50  | <i>T. cruzi</i> | 88  | 666 | 753  |
| Tc00.1047053507669.60  | <i>T. cruzi</i> | 87  | 30  | 116  |
| Tc00.1047053507669.70  | <i>T. cruzi</i> | 54  | 1   | 54   |
| Tc00.1047053507669.70  | <i>T. cruzi</i> | 54  | 77  | 130  |
| Tc00.1047053507669.70  | <i>T. cruzi</i> | 54  | 182 | 235  |
| Tc00.1047053507669.70  | <i>T. cruzi</i> | 41  | 627 | 667  |
| Tc00.1047053507669.80  | <i>T. cruzi</i> | 106 | 112 | 217  |
| Tc00.1047053507669.80  | <i>T. cruzi</i> | 66  | 496 | 561  |
| Tc00.1047053507669.80  | <i>T. cruzi</i> | 56  | 716 | 771  |
| Tc00.1047053507669.84  | <i>T. cruzi</i> | 115 | 478 | 592  |
| Tc00.1047053507669.90  | <i>T. cruzi</i> | 68  | 239 | 306  |
| Tc00.1047053507671.10  | <i>T. cruzi</i> | 103 | 30  | 132  |
| Tc00.1047053507671.20  | <i>T. cruzi</i> | 50  | 81  | 130  |
| Tc00.1047053507671.30  | <i>T. cruzi</i> | 75  | 64  | 138  |
| Tc00.1047053507671.39  | <i>T. cruzi</i> | 44  | 1   | 44   |
| Tc00.1047053507673.20  | <i>T. cruzi</i> | 47  | 236 | 282  |
| Tc00.1047053507673.30  | <i>T. cruzi</i> | 76  | 1   | 76   |
| Tc00.1047053507673.30  | <i>T. cruzi</i> | 48  | 146 | 193  |
| Tc00.1047053507673.65  | <i>T. cruzi</i> | 57  | 1   | 57   |
| Tc00.1047053507673.70  | <i>T. cruzi</i> | 40  | 1   | 40   |

|                        |                 |     |      |      |
|------------------------|-----------------|-----|------|------|
| Tc00.1047053507677.10  | <i>T. cruzi</i> | 75  | 81   | 155  |
| Tc00.1047053507677.10  | <i>T. cruzi</i> | 137 | 411  | 547  |
| Tc00.1047053507677.10  | <i>T. cruzi</i> | 71  | 606  | 676  |
| Tc00.1047053507677.110 | <i>T. cruzi</i> | 142 | 246  | 387  |
| Tc00.1047053507677.120 | <i>T. cruzi</i> | 73  | 22   | 94   |
| Tc00.1047053507677.120 | <i>T. cruzi</i> | 66  | 180  | 245  |
| Tc00.1047053507677.120 | <i>T. cruzi</i> | 155 | 471  | 625  |
| Tc00.1047053507677.129 | <i>T. cruzi</i> | 48  | 1    | 48   |
| Tc00.1047053507677.129 | <i>T. cruzi</i> | 56  | 132  | 187  |
| Tc00.1047053507677.129 | <i>T. cruzi</i> | 81  | 596  | 676  |
| Tc00.1047053507677.129 | <i>T. cruzi</i> | 40  | 988  | 1027 |
| Tc00.1047053507677.129 | <i>T. cruzi</i> | 45  | 1259 | 1303 |
| Tc00.1047053507677.140 | <i>T. cruzi</i> | 342 | 1    | 342  |
| Tc00.1047053507677.140 | <i>T. cruzi</i> | 45  | 406  | 450  |
| Tc00.1047053507677.140 | <i>T. cruzi</i> | 61  | 574  | 634  |
| Tc00.1047053507677.140 | <i>T. cruzi</i> | 60  | 672  | 731  |
| Tc00.1047053507677.150 | <i>T. cruzi</i> | 47  | 51   | 97   |
| Tc00.1047053507677.150 | <i>T. cruzi</i> | 199 | 129  | 327  |
| Tc00.1047053507677.150 | <i>T. cruzi</i> | 128 | 359  | 486  |
| Tc00.1047053507677.150 | <i>T. cruzi</i> | 116 | 621  | 736  |
| Tc00.1047053507677.150 | <i>T. cruzi</i> | 119 | 746  | 864  |
| Tc00.1047053507677.150 | <i>T. cruzi</i> | 57  | 886  | 942  |
| Tc00.1047053507677.150 | <i>T. cruzi</i> | 63  | 979  | 1041 |
| Tc00.1047053507677.20  | <i>T. cruzi</i> | 49  | 1    | 49   |
| Tc00.1047053507677.20  | <i>T. cruzi</i> | 40  | 94   | 133  |
| Tc00.1047053507677.20  | <i>T. cruzi</i> | 253 | 165  | 417  |
| Tc00.1047053507677.30  | <i>T. cruzi</i> | 42  | 1    | 42   |
| Tc00.1047053507677.30  | <i>T. cruzi</i> | 50  | 82   | 131  |
| Tc00.1047053507677.30  | <i>T. cruzi</i> | 53  | 404  | 456  |
| Tc00.1047053507677.4   | <i>T. cruzi</i> | 160 | 1    | 160  |
| Tc00.1047053507677.4   | <i>T. cruzi</i> | 94  | 173  | 266  |
| Tc00.1047053507677.60  | <i>T. cruzi</i> | 56  | 150  | 205  |
| Tc00.1047053507677.60  | <i>T. cruzi</i> | 48  | 225  | 272  |
| Tc00.1047053507677.60  | <i>T. cruzi</i> | 63  | 538  | 600  |
| Tc00.1047053507677.90  | <i>T. cruzi</i> | 41  | 1    | 41   |
| Tc00.1047053507677.90  | <i>T. cruzi</i> | 45  | 95   | 139  |
| Tc00.1047053507677.90  | <i>T. cruzi</i> | 190 | 216  | 405  |
| Tc00.1047053507683.30  | <i>T. cruzi</i> | 59  | 29   | 87   |
| Tc00.1047053507683.30  | <i>T. cruzi</i> | 219 | 240  | 458  |
| Tc00.1047053507683.30  | <i>T. cruzi</i> | 95  | 1001 | 1095 |
| Tc00.1047053507683.30  | <i>T. cruzi</i> | 44  | 1155 | 1198 |
| Tc00.1047053507683.30  | <i>T. cruzi</i> | 163 | 1349 | 1511 |
| Tc00.1047053507683.34  | <i>T. cruzi</i> | 284 | 1    | 284  |
| Tc00.1047053507683.34  | <i>T. cruzi</i> | 87  | 388  | 474  |
| Tc00.1047053507683.40  | <i>T. cruzi</i> | 58  | 1    | 58   |
| Tc00.1047053507683.40  | <i>T. cruzi</i> | 65  | 62   | 126  |
| Tc00.1047053507683.40  | <i>T. cruzi</i> | 61  | 131  | 191  |

|                        |                 |     |      |      |
|------------------------|-----------------|-----|------|------|
| Tc00.1047053507683.40  | <i>T. cruzi</i> | 158 | 200  | 357  |
| Tc00.1047053507683.40  | <i>T. cruzi</i> | 62  | 500  | 561  |
| Tc00.1047053507683.40  | <i>T. cruzi</i> | 60  | 894  | 953  |
| Tc00.1047053507683.40  | <i>T. cruzi</i> | 45  | 1055 | 1099 |
| Tc00.1047053507689.20  | <i>T. cruzi</i> | 211 | 41   | 251  |
| Tc00.1047053507689.25  | <i>T. cruzi</i> | 173 | 29   | 201  |
| Tc00.1047053507699.10  | <i>T. cruzi</i> | 279 | 25   | 303  |
| Tc00.1047053507699.120 | <i>T. cruzi</i> | 244 | 25   | 268  |
| Tc00.1047053507699.130 | <i>T. cruzi</i> | 320 | 27   | 346  |
| Tc00.1047053507699.149 | <i>T. cruzi</i> | 140 | 23   | 162  |
| Tc00.1047053507699.200 | <i>T. cruzi</i> | 173 | 20   | 192  |
| Tc00.1047053507699.210 | <i>T. cruzi</i> | 117 | 50   | 166  |
| Tc00.1047053507699.210 | <i>T. cruzi</i> | 77  | 190  | 266  |
| Tc00.1047053507699.230 | <i>T. cruzi</i> | 147 | 262  | 408  |
| Tc00.1047053507699.64  | <i>T. cruzi</i> | 148 | 26   | 173  |
| Tc00.1047053507699.90  | <i>T. cruzi</i> | 273 | 25   | 297  |
| Tc00.1047053507701.10  | <i>T. cruzi</i> | 298 | 24   | 321  |
| Tc00.1047053507701.4   | <i>T. cruzi</i> | 138 | 74   | 211  |
| Tc00.1047053507709.10  | <i>T. cruzi</i> | 64  | 58   | 121  |
| Tc00.1047053507709.10  | <i>T. cruzi</i> | 75  | 250  | 324  |
| Tc00.1047053507709.10  | <i>T. cruzi</i> | 75  | 250  | 324  |
| Tc00.1047053507709.100 | <i>T. cruzi</i> | 205 | 1    | 205  |
| Tc00.1047053507709.120 | <i>T. cruzi</i> | 150 | 1    | 150  |
| Tc00.1047053507709.120 | <i>T. cruzi</i> | 103 | 156  | 258  |
| Tc00.1047053507709.120 | <i>T. cruzi</i> | 663 | 400  | 1062 |
| Tc00.1047053507709.120 | <i>T. cruzi</i> | 290 | 1065 | 1354 |
| Tc00.1047053507709.130 | <i>T. cruzi</i> | 43  | 1    | 43   |
| Tc00.1047053507709.20  | <i>T. cruzi</i> | 55  | 672  | 726  |
| Tc00.1047053507709.30  | <i>T. cruzi</i> | 155 | 208  | 362  |
| Tc00.1047053507709.40  | <i>T. cruzi</i> | 85  | 211  | 295  |
| Tc00.1047053507709.44  | <i>T. cruzi</i> | 87  | 1    | 87   |
| Tc00.1047053507709.44  | <i>T. cruzi</i> | 51  | 303  | 353  |
| Tc00.1047053507709.44  | <i>T. cruzi</i> | 51  | 303  | 353  |
| Tc00.1047053507709.50  | <i>T. cruzi</i> | 58  | 100  | 157  |
| Tc00.1047053507709.60  | <i>T. cruzi</i> | 42  | 302  | 343  |
| Tc00.1047053507709.70  | <i>T. cruzi</i> | 56  | 193  | 248  |
| Tc00.1047053507711.10  | <i>T. cruzi</i> | 57  | 165  | 221  |
| Tc00.1047053507711.10  | <i>T. cruzi</i> | 90  | 264  | 353  |
| Tc00.1047053507711.10  | <i>T. cruzi</i> | 90  | 264  | 353  |
| Tc00.1047053507711.100 | <i>T. cruzi</i> | 105 | 292  | 396  |
| Tc00.1047053507711.110 | <i>T. cruzi</i> | 66  | 97   | 162  |
| Tc00.1047053507711.110 | <i>T. cruzi</i> | 95  | 292  | 386  |
| Tc00.1047053507711.110 | <i>T. cruzi</i> | 95  | 292  | 386  |
| Tc00.1047053507711.120 | <i>T. cruzi</i> | 58  | 434  | 491  |
| Tc00.1047053507711.130 | <i>T. cruzi</i> | 42  | 1    | 42   |
| Tc00.1047053507711.140 | <i>T. cruzi</i> | 70  | 343  | 412  |
| Tc00.1047053507711.160 | <i>T. cruzi</i> | 40  | 1    | 40   |

|                        |                 |     |      |      |
|------------------------|-----------------|-----|------|------|
| Tc00.1047053507711.160 | <i>T. cruzi</i> | 45  | 1496 | 1540 |
| Tc00.1047053507711.160 | <i>T. cruzi</i> | 103 | 1639 | 1741 |
| Tc00.1047053507711.170 | <i>T. cruzi</i> | 102 | 167  | 268  |
| Tc00.1047053507711.170 | <i>T. cruzi</i> | 65  | 362  | 426  |
| Tc00.1047053507711.180 | <i>T. cruzi</i> | 46  | 102  | 147  |
| Tc00.1047053507711.180 | <i>T. cruzi</i> | 46  | 204  | 249  |
| Tc00.1047053507711.180 | <i>T. cruzi</i> | 46  | 204  | 249  |
| Tc00.1047053507711.190 | <i>T. cruzi</i> | 45  | 330  | 374  |
| Tc00.1047053507711.210 | <i>T. cruzi</i> | 74  | 12   | 85   |
| Tc00.1047053507711.210 | <i>T. cruzi</i> | 45  | 723  | 767  |
| Tc00.1047053507711.210 | <i>T. cruzi</i> | 45  | 723  | 767  |
| Tc00.1047053507711.230 | <i>T. cruzi</i> | 150 | 23   | 172  |
| Tc00.1047053507711.230 | <i>T. cruzi</i> | 44  | 221  | 264  |
| Tc00.1047053507711.230 | <i>T. cruzi</i> | 44  | 221  | 264  |
| Tc00.1047053507711.240 | <i>T. cruzi</i> | 42  | 55   | 96   |
| Tc00.1047053507711.240 | <i>T. cruzi</i> | 51  | 561  | 611  |
| Tc00.1047053507711.250 | <i>T. cruzi</i> | 46  | 1    | 46   |
| Tc00.1047053507711.250 | <i>T. cruzi</i> | 65  | 129  | 193  |
| Tc00.1047053507711.250 | <i>T. cruzi</i> | 47  | 196  | 242  |
| Tc00.1047053507711.250 | <i>T. cruzi</i> | 713 | 289  | 1001 |
| Tc00.1047053507711.260 | <i>T. cruzi</i> | 44  | 44   | 87   |
| Tc00.1047053507711.260 | <i>T. cruzi</i> | 112 | 111  | 222  |
| Tc00.1047053507711.260 | <i>T. cruzi</i> | 112 | 111  | 222  |
| Tc00.1047053507711.270 | <i>T. cruzi</i> | 46  | 115  | 160  |
| Tc00.1047053507711.280 | <i>T. cruzi</i> | 49  | 32   | 80   |
| Tc00.1047053507711.30  | <i>T. cruzi</i> | 54  | 1    | 54   |
| Tc00.1047053507711.320 | <i>T. cruzi</i> | 74  | 204  | 277  |
| Tc00.1047053507711.340 | <i>T. cruzi</i> | 170 | 46   | 215  |
| Tc00.1047053507711.40  | <i>T. cruzi</i> | 75  | 72   | 146  |
| Tc00.1047053507711.60  | <i>T. cruzi</i> | 41  | 1    | 41   |
| Tc00.1047053507711.60  | <i>T. cruzi</i> | 237 | 53   | 289  |
| Tc00.1047053507711.60  | <i>T. cruzi</i> | 171 | 299  | 469  |
| Tc00.1047053507711.60  | <i>T. cruzi</i> | 120 | 520  | 639  |
| Tc00.1047053507711.60  | <i>T. cruzi</i> | 193 | 652  | 844  |
| Tc00.1047053507711.70  | <i>T. cruzi</i> | 44  | 141  | 184  |
| Tc00.1047053507711.70  | <i>T. cruzi</i> | 57  | 324  | 380  |
| Tc00.1047053507711.70  | <i>T. cruzi</i> | 57  | 324  | 380  |
| Tc00.1047053507711.80  | <i>T. cruzi</i> | 152 | 75   | 226  |
| Tc00.1047053507711.80  | <i>T. cruzi</i> | 47  | 254  | 300  |
| Tc00.1047053507711.90  | <i>T. cruzi</i> | 47  | 97   | 143  |
| Tc00.1047053507711.90  | <i>T. cruzi</i> | 96  | 306  | 401  |
| Tc00.1047053507711.90  | <i>T. cruzi</i> | 96  | 306  | 401  |
| Tc00.1047053507713.20  | <i>T. cruzi</i> | 65  | 1    | 65   |
| Tc00.1047053507713.20  | <i>T. cruzi</i> | 58  | 73   | 130  |
| Tc00.1047053507713.20  | <i>T. cruzi</i> | 56  | 182  | 237  |
| Tc00.1047053507713.30  | <i>T. cruzi</i> | 78  | 199  | 276  |
| Tc00.1047053507713.30  | <i>T. cruzi</i> | 51  | 507  | 557  |

|                        |                 |     |      |      |
|------------------------|-----------------|-----|------|------|
| Tc00.1047053507719.9   | <i>T. cruzi</i> | 57  | 212  | 268  |
| Tc00.1047053507719.9   | <i>T. cruzi</i> | 42  | 1594 | 1635 |
| Tc00.1047053507719.9   | <i>T. cruzi</i> | 62  | 2828 | 2889 |
| Tc00.1047053507735.20  | <i>T. cruzi</i> | 105 | 424  | 528  |
| Tc00.1047053507735.20  | <i>T. cruzi</i> | 45  | 750  | 794  |
| Tc00.1047053507735.20  | <i>T. cruzi</i> | 47  | 2569 | 2615 |
| Tc00.1047053507735.20  | <i>T. cruzi</i> | 53  | 4004 | 4056 |
| Tc00.1047053507735.30  | <i>T. cruzi</i> | 83  | 1    | 83   |
| Tc00.1047053507735.30  | <i>T. cruzi</i> | 159 | 131  | 289  |
| Tc00.1047053507735.30  | <i>T. cruzi</i> | 159 | 131  | 289  |
| Tc00.1047053507735.60  | <i>T. cruzi</i> | 44  | 1    | 44   |
| Tc00.1047053507735.60  | <i>T. cruzi</i> | 59  | 181  | 239  |
| Tc00.1047053507735.60  | <i>T. cruzi</i> | 43  | 475  | 517  |
| Tc00.1047053507735.69  | <i>T. cruzi</i> | 87  | 233  | 319  |
| Tc00.1047053507737.20  | <i>T. cruzi</i> | 226 | 1    | 226  |
| Tc00.1047053507737.20  | <i>T. cruzi</i> | 94  | 663  | 756  |
| Tc00.1047053507737.20  | <i>T. cruzi</i> | 82  | 794  | 875  |
| Tc00.1047053507737.30  | <i>T. cruzi</i> | 73  | 39   | 111  |
| Tc00.1047053507737.30  | <i>T. cruzi</i> | 77  | 187  | 263  |
| Tc00.1047053507739.100 | <i>T. cruzi</i> | 45  | 1    | 45   |
| Tc00.1047053507739.100 | <i>T. cruzi</i> | 78  | 203  | 280  |
| Tc00.1047053507739.110 | <i>T. cruzi</i> | 100 | 1066 | 1165 |
| Tc00.1047053507739.20  | <i>T. cruzi</i> | 55  | 28   | 82   |
| Tc00.1047053507739.30  | <i>T. cruzi</i> | 60  | 32   | 91   |
| Tc00.1047053507739.80  | <i>T. cruzi</i> | 87  | 60   | 146  |
| Tc00.1047053507739.90  | <i>T. cruzi</i> | 58  | 1    | 58   |
| Tc00.1047053507747.110 | <i>T. cruzi</i> | 171 | 20   | 190  |
| Tc00.1047053507747.160 | <i>T. cruzi</i> | 151 | 27   | 177  |
| Tc00.1047053507747.170 | <i>T. cruzi</i> | 250 | 24   | 273  |
| Tc00.1047053507747.180 | <i>T. cruzi</i> | 45  | 259  | 303  |
| Tc00.1047053507747.180 | <i>T. cruzi</i> | 75  | 386  | 460  |
| Tc00.1047053507747.180 | <i>T. cruzi</i> | 196 | 675  | 870  |
| Tc00.1047053507747.210 | <i>T. cruzi</i> | 48  | 1    | 48   |
| Tc00.1047053507747.210 | <i>T. cruzi</i> | 86  | 127  | 212  |
| Tc00.1047053507747.210 | <i>T. cruzi</i> | 41  | 635  | 675  |
| Tc00.1047053507747.220 | <i>T. cruzi</i> | 42  | 138  | 179  |
| Tc00.1047053507747.240 | <i>T. cruzi</i> | 46  | 830  | 875  |
| Tc00.1047053507747.260 | <i>T. cruzi</i> | 78  | 140  | 217  |
| Tc00.1047053507747.260 | <i>T. cruzi</i> | 77  | 504  | 580  |
| Tc00.1047053507747.80  | <i>T. cruzi</i> | 174 | 25   | 198  |
| Tc00.1047053507755.10  | <i>T. cruzi</i> | 77  | 1    | 77   |
| Tc00.1047053507755.10  | <i>T. cruzi</i> | 42  | 127  | 168  |
| Tc00.1047053507755.10  | <i>T. cruzi</i> | 42  | 127  | 168  |
| Tc00.1047053507757.10  | <i>T. cruzi</i> | 52  | 37   | 88   |
| Tc00.1047053507757.40  | <i>T. cruzi</i> | 46  | 56   | 101  |
| Tc00.1047053507757.40  | <i>T. cruzi</i> | 71  | 571  | 641  |
| Tc00.1047053507757.40  | <i>T. cruzi</i> | 71  | 571  | 641  |

|                        |                 |     |      |      |
|------------------------|-----------------|-----|------|------|
| Tc00.1047053507757.70  | <i>T. cruzi</i> | 45  | 257  | 301  |
| Tc00.1047053507759.10  | <i>T. cruzi</i> | 44  | 1    | 44   |
| Tc00.1047053507759.10  | <i>T. cruzi</i> | 297 | 706  | 1002 |
| Tc00.1047053507795.100 | <i>T. cruzi</i> | 108 | 366  | 473  |
| Tc00.1047053507795.50  | <i>T. cruzi</i> | 56  | 1    | 56   |
| Tc00.1047053507795.50  | <i>T. cruzi</i> | 71  | 112  | 182  |
| Tc00.1047053507795.50  | <i>T. cruzi</i> | 71  | 112  | 182  |
| Tc00.1047053507795.80  | <i>T. cruzi</i> | 56  | 201  | 256  |
| Tc00.1047053507795.90  | <i>T. cruzi</i> | 45  | 32   | 76   |
| Tc00.1047053507795.90  | <i>T. cruzi</i> | 44  | 240  | 283  |
| Tc00.1047053507795.90  | <i>T. cruzi</i> | 44  | 240  | 283  |
| Tc00.1047053507797.18  | <i>T. cruzi</i> | 60  | 220  | 279  |
| Tc00.1047053507803.10  | <i>T. cruzi</i> | 328 | 31   | 358  |
| Tc00.1047053507803.30  | <i>T. cruzi</i> | 663 | 1    | 663  |
| Tc00.1047053507803.30  | <i>T. cruzi</i> | 107 | 698  | 804  |
| Tc00.1047053507803.40  | <i>T. cruzi</i> | 42  | 1    | 42   |
| Tc00.1047053507803.40  | <i>T. cruzi</i> | 109 | 164  | 272  |
| Tc00.1047053507803.40  | <i>T. cruzi</i> | 46  | 287  | 332  |
| Tc00.1047053507803.40  | <i>T. cruzi</i> | 196 | 369  | 564  |
| Tc00.1047053507803.40  | <i>T. cruzi</i> | 100 | 666  | 765  |
| Tc00.1047053507803.40  | <i>T. cruzi</i> | 79  | 827  | 905  |
| Tc00.1047053507803.40  | <i>T. cruzi</i> | 96  | 1006 | 1101 |
| Tc00.1047053507805.20  | <i>T. cruzi</i> | 67  | 50   | 116  |
| Tc00.1047053507807.20  | <i>T. cruzi</i> | 104 | 82   | 185  |
| Tc00.1047053507807.30  | <i>T. cruzi</i> | 114 | 1    | 114  |
| Tc00.1047053507807.30  | <i>T. cruzi</i> | 492 | 149  | 640  |
| Tc00.1047053507807.40  | <i>T. cruzi</i> | 128 | 45   | 172  |
| Tc00.1047053507807.40  | <i>T. cruzi</i> | 52  | 340  | 391  |
| Tc00.1047053507809.100 | <i>T. cruzi</i> | 42  | 1    | 42   |
| Tc00.1047053507809.100 | <i>T. cruzi</i> | 316 | 279  | 594  |
| Tc00.1047053507809.100 | <i>T. cruzi</i> | 113 | 640  | 752  |
| Tc00.1047053507809.100 | <i>T. cruzi</i> | 89  | 928  | 1016 |
| Tc00.1047053507809.100 | <i>T. cruzi</i> | 58  | 1172 | 1229 |
| Tc00.1047053507809.100 | <i>T. cruzi</i> | 41  | 1303 | 1343 |
| Tc00.1047053507809.100 | <i>T. cruzi</i> | 79  | 1384 | 1462 |
| Tc00.1047053507809.100 | <i>T. cruzi</i> | 67  | 1548 | 1614 |
| Tc00.1047053507809.119 | <i>T. cruzi</i> | 111 | 41   | 151  |
| Tc00.1047053507809.119 | <i>T. cruzi</i> | 168 | 239  | 406  |
| Tc00.1047053507809.119 | <i>T. cruzi</i> | 54  | 482  | 535  |
| Tc00.1047053507809.119 | <i>T. cruzi</i> | 59  | 643  | 701  |
| Tc00.1047053507809.130 | <i>T. cruzi</i> | 353 | 1    | 353  |
| Tc00.1047053507809.130 | <i>T. cruzi</i> | 140 | 395  | 534  |
| Tc00.1047053507809.130 | <i>T. cruzi</i> | 150 | 567  | 716  |
| Tc00.1047053507809.130 | <i>T. cruzi</i> | 156 | 1081 | 1236 |
| Tc00.1047053507809.14  | <i>T. cruzi</i> | 108 | 504  | 611  |
| Tc00.1047053507809.140 | <i>T. cruzi</i> | 242 | 1    | 242  |
| Tc00.1047053507809.140 | <i>T. cruzi</i> | 87  | 285  | 371  |



|                        |                 |     |      |      |
|------------------------|-----------------|-----|------|------|
| Tc00.1047053507809.140 | <i>T. cruzi</i> | 49  | 494  | 542  |
| Tc00.1047053507809.140 | <i>T. cruzi</i> | 61  | 709  | 769  |
| Tc00.1047053507809.140 | <i>T. cruzi</i> | 83  | 808  | 890  |
| Tc00.1047053507809.140 | <i>T. cruzi</i> | 42  | 947  | 988  |
| Tc00.1047053507809.140 | <i>T. cruzi</i> | 97  | 999  | 1095 |
| Tc00.1047053507809.140 | <i>T. cruzi</i> | 99  | 1104 | 1202 |
| Tc00.1047053507809.150 | <i>T. cruzi</i> | 81  | 21   | 101  |
| Tc00.1047053507809.160 | <i>T. cruzi</i> | 211 | 153  | 363  |
| Tc00.1047053507809.30  | <i>T. cruzi</i> | 90  | 472  | 561  |
| Tc00.1047053507809.39  | <i>T. cruzi</i> | 54  | 1    | 54   |
| Tc00.1047053507809.50  | <i>T. cruzi</i> | 151 | 1    | 151  |
| Tc00.1047053507809.60  | <i>T. cruzi</i> | 50  | 1    | 50   |
| Tc00.1047053507809.60  | <i>T. cruzi</i> | 87  | 117  | 203  |
| Tc00.1047053507809.80  | <i>T. cruzi</i> | 55  | 255  | 309  |
| Tc00.1047053507809.80  | <i>T. cruzi</i> | 146 | 482  | 627  |
| Tc00.1047053507809.80  | <i>T. cruzi</i> | 64  | 1552 | 1615 |
| Tc00.1047053507809.90  | <i>T. cruzi</i> | 216 | 54   | 269  |
| Tc00.1047053507809.90  | <i>T. cruzi</i> | 69  | 345  | 413  |
| Tc00.1047053507809.90  | <i>T. cruzi</i> | 50  | 470  | 519  |
| Tc00.1047053507809.90  | <i>T. cruzi</i> | 68  | 521  | 588  |
| Tc00.1047053507809.90  | <i>T. cruzi</i> | 94  | 624  | 717  |
| Tc00.1047053507809.90  | <i>T. cruzi</i> | 65  | 796  | 860  |
| Tc00.1047053507811.120 | <i>T. cruzi</i> | 165 | 665  | 829  |
| Tc00.1047053507811.120 | <i>T. cruzi</i> | 87  | 872  | 958  |
| Tc00.1047053507811.120 | <i>T. cruzi</i> | 77  | 986  | 1062 |
| Tc00.1047053507811.20  | <i>T. cruzi</i> | 49  | 544  | 592  |
| Tc00.1047053507811.20  | <i>T. cruzi</i> | 60  | 640  | 699  |
| Tc00.1047053507811.20  | <i>T. cruzi</i> | 86  | 737  | 822  |
| Tc00.1047053507811.20  | <i>T. cruzi</i> | 85  | 883  | 967  |
| Tc00.1047053507811.30  | <i>T. cruzi</i> | 168 | 1    | 168  |
| Tc00.1047053507811.30  | <i>T. cruzi</i> | 40  | 213  | 252  |
| Tc00.1047053507811.30  | <i>T. cruzi</i> | 45  | 677  | 721  |
| Tc00.1047053507811.30  | <i>T. cruzi</i> | 122 | 728  | 849  |
| Tc00.1047053507811.40  | <i>T. cruzi</i> | 66  | 75   | 140  |
| Tc00.1047053507811.40  | <i>T. cruzi</i> | 47  | 295  | 341  |
| Tc00.1047053507811.40  | <i>T. cruzi</i> | 103 | 346  | 448  |
| Tc00.1047053507811.50  | <i>T. cruzi</i> | 101 | 50   | 150  |
| Tc00.1047053507811.70  | <i>T. cruzi</i> | 80  | 170  | 249  |
| Tc00.1047053507817.18  | <i>T. cruzi</i> | 107 | 1    | 107  |
| Tc00.1047053507817.30  | <i>T. cruzi</i> | 96  | 198  | 293  |
| Tc00.1047053507817.40  | <i>T. cruzi</i> | 51  | 179  | 229  |
| Tc00.1047053507817.60  | <i>T. cruzi</i> | 66  | 40   | 105  |
| Tc00.1047053507817.60  | <i>T. cruzi</i> | 42  | 497  | 538  |
| Tc00.1047053507817.60  | <i>T. cruzi</i> | 47  | 746  | 792  |
| Tc00.1047053507817.70  | <i>T. cruzi</i> | 108 | 148  | 255  |
| Tc00.1047053507817.9   | <i>T. cruzi</i> | 107 | 1    | 107  |
| Tc00.1047053507827.10  | <i>T. cruzi</i> | 47  | 225  | 271  |

|                        |                 |     |      |      |
|------------------------|-----------------|-----|------|------|
| Tc00.1047053507827.10  | <i>T. cruzi</i> | 51  | 1596 | 1646 |
| Tc00.1047053507827.10  | <i>T. cruzi</i> | 41  | 2004 | 2044 |
| Tc00.1047053507827.10  | <i>T. cruzi</i> | 67  | 2834 | 2900 |
| Tc00.1047053507827.10  | <i>T. cruzi</i> | 82  | 3379 | 3460 |
| Tc00.1047053507831.10  | <i>T. cruzi</i> | 87  | 1    | 87   |
| Tc00.1047053507831.100 | <i>T. cruzi</i> | 57  | 1    | 57   |
| Tc00.1047053507831.100 | <i>T. cruzi</i> | 183 | 88   | 270  |
| Tc00.1047053507831.100 | <i>T. cruzi</i> | 106 | 297  | 402  |
| Tc00.1047053507831.100 | <i>T. cruzi</i> | 59  | 404  | 462  |
| Tc00.1047053507831.100 | <i>T. cruzi</i> | 63  | 473  | 535  |
| Tc00.1047053507831.110 | <i>T. cruzi</i> | 214 | 95   | 308  |
| Tc00.1047053507831.110 | <i>T. cruzi</i> | 57  | 660  | 716  |
| Tc00.1047053507831.110 | <i>T. cruzi</i> | 144 | 730  | 873  |
| Tc00.1047053507831.20  | <i>T. cruzi</i> | 108 | 230  | 337  |
| Tc00.1047053507831.30  | <i>T. cruzi</i> | 167 | 224  | 390  |
| Tc00.1047053507831.40  | <i>T. cruzi</i> | 70  | 221  | 290  |
| Tc00.1047053507831.40  | <i>T. cruzi</i> | 140 | 299  | 438  |
| Tc00.1047053507831.40  | <i>T. cruzi</i> | 83  | 472  | 554  |
| Tc00.1047053507831.50  | <i>T. cruzi</i> | 154 | 1    | 154  |
| Tc00.1047053507831.50  | <i>T. cruzi</i> | 76  | 192  | 267  |
| Tc00.1047053507831.50  | <i>T. cruzi</i> | 561 | 379  | 939  |
| Tc00.1047053507831.60  | <i>T. cruzi</i> | 49  | 329  | 377  |
| Tc00.1047053507831.60  | <i>T. cruzi</i> | 76  | 511  | 586  |
| Tc00.1047053507831.60  | <i>T. cruzi</i> | 117 | 716  | 832  |
| Tc00.1047053507831.70  | <i>T. cruzi</i> | 79  | 282  | 360  |
| Tc00.1047053507831.80  | <i>T. cruzi</i> | 110 | 34   | 143  |
| Tc00.1047053507831.90  | <i>T. cruzi</i> | 83  | 1    | 83   |
| Tc00.1047053507831.90  | <i>T. cruzi</i> | 78  | 94   | 171  |
| Tc00.1047053507835.35  | <i>T. cruzi</i> | 42  | 1    | 42   |
| Tc00.1047053507835.70  | <i>T. cruzi</i> | 48  | 246  | 293  |
| Tc00.1047053507835.70  | <i>T. cruzi</i> | 51  | 1623 | 1673 |
| Tc00.1047053507835.70  | <i>T. cruzi</i> | 90  | 2836 | 2925 |
| Tc00.1047053507835.70  | <i>T. cruzi</i> | 62  | 3404 | 3465 |
| Tc00.1047053507837.100 | <i>T. cruzi</i> | 146 | 583  | 728  |
| Tc00.1047053507837.100 | <i>T. cruzi</i> | 57  | 780  | 836  |
| Tc00.1047053507837.100 | <i>T. cruzi</i> | 129 | 1019 | 1147 |
| Tc00.1047053507837.100 | <i>T. cruzi</i> | 56  | 1187 | 1242 |
| Tc00.1047053507837.100 | <i>T. cruzi</i> | 88  | 1454 | 1541 |
| Tc00.1047053507837.100 | <i>T. cruzi</i> | 66  | 1585 | 1650 |
| Tc00.1047053507837.20  | <i>T. cruzi</i> | 54  | 424  | 477  |
| Tc00.1047053507837.30  | <i>T. cruzi</i> | 105 | 243  | 347  |
| Tc00.1047053507837.40  | <i>T. cruzi</i> | 68  | 168  | 235  |
| Tc00.1047053507837.50  | <i>T. cruzi</i> | 48  | 1    | 48   |
| Tc00.1047053507837.60  | <i>T. cruzi</i> | 54  | 102  | 155  |
| Tc00.1047053507837.80  | <i>T. cruzi</i> | 50  | 1    | 50   |
| Tc00.1047053507837.80  | <i>T. cruzi</i> | 56  | 63   | 118  |
| Tc00.1047053507837.80  | <i>T. cruzi</i> | 56  | 63   | 118  |

|                        |                 |     |      |      |
|------------------------|-----------------|-----|------|------|
| Tc00.1047053507837.90  | <i>T. cruzi</i> | 48  | 286  | 333  |
| Tc00.1047053507839.18  | <i>T. cruzi</i> | 206 | 1    | 206  |
| Tc00.1047053507839.30  | <i>T. cruzi</i> | 57  | 692  | 748  |
| Tc00.1047053507839.40  | <i>T. cruzi</i> | 42  | 1    | 42   |
| Tc00.1047053507839.40  | <i>T. cruzi</i> | 42  | 231  | 272  |
| Tc00.1047053507839.40  | <i>T. cruzi</i> | 42  | 231  | 272  |
| Tc00.1047053507841.14  | <i>T. cruzi</i> | 66  | 131  | 196  |
| Tc00.1047053507841.30  | <i>T. cruzi</i> | 62  | 278  | 339  |
| Tc00.1047053507841.34  | <i>T. cruzi</i> | 40  | 51   | 90   |
| Tc00.1047053507859.60  | <i>T. cruzi</i> | 242 | 68   | 309  |
| Tc00.1047053507861.14  | <i>T. cruzi</i> | 50  | 241  | 290  |
| Tc00.1047053507867.10  | <i>T. cruzi</i> | 248 | 25   | 272  |
| Tc00.1047053507867.100 | <i>T. cruzi</i> | 73  | 47   | 119  |
| Tc00.1047053507867.5   | <i>T. cruzi</i> | 42  | 1    | 42   |
| Tc00.1047053507867.50  | <i>T. cruzi</i> | 111 | 67   | 177  |
| Tc00.1047053507867.60  | <i>T. cruzi</i> | 64  | 1    | 64   |
| Tc00.1047053507867.70  | <i>T. cruzi</i> | 58  | 1    | 58   |
| Tc00.1047053507867.70  | <i>T. cruzi</i> | 46  | 93   | 138  |
| Tc00.1047053507867.70  | <i>T. cruzi</i> | 46  | 93   | 138  |
| Tc00.1047053507867.80  | <i>T. cruzi</i> | 77  | 1    | 77   |
| Tc00.1047053507867.80  | <i>T. cruzi</i> | 89  | 547  | 635  |
| Tc00.1047053507867.80  | <i>T. cruzi</i> | 85  | 701  | 785  |
| Tc00.1047053507867.80  | <i>T. cruzi</i> | 45  | 814  | 858  |
| Tc00.1047053507867.80  | <i>T. cruzi</i> | 95  | 1286 | 1380 |
| Tc00.1047053507867.80  | <i>T. cruzi</i> | 73  | 1390 | 1462 |
| Tc00.1047053507867.80  | <i>T. cruzi</i> | 164 | 1464 | 1627 |
| Tc00.1047053507867.80  | <i>T. cruzi</i> | 287 | 1641 | 1927 |
| Tc00.1047053507867.90  | <i>T. cruzi</i> | 66  | 64   | 129  |
| Tc00.1047053507867.90  | <i>T. cruzi</i> | 58  | 196  | 253  |
| Tc00.1047053507867.90  | <i>T. cruzi</i> | 46  | 271  | 316  |
| Tc00.1047053507867.90  | <i>T. cruzi</i> | 67  | 419  | 485  |
| Tc00.1047053507873.30  | <i>T. cruzi</i> | 66  | 1    | 66   |
| Tc00.1047053507873.30  | <i>T. cruzi</i> | 114 | 221  | 334  |
| Tc00.1047053507873.30  | <i>T. cruzi</i> | 114 | 221  | 334  |
| Tc00.1047053507873.60  | <i>T. cruzi</i> | 75  | 1    | 75   |
| Tc00.1047053507875.140 | <i>T. cruzi</i> | 65  | 50   | 114  |
| Tc00.1047053507875.170 | <i>T. cruzi</i> | 102 | 124  | 225  |
| Tc00.1047053507875.180 | <i>T. cruzi</i> | 114 | 138  | 251  |
| Tc00.1047053507875.220 | <i>T. cruzi</i> | 46  | 1    | 46   |
| Tc00.1047053507875.220 | <i>T. cruzi</i> | 48  | 225  | 272  |
| Tc00.1047053507875.220 | <i>T. cruzi</i> | 55  | 697  | 751  |
| Tc00.1047053507875.50  | <i>T. cruzi</i> | 123 | 63   | 185  |
| Tc00.1047053507875.70  | <i>T. cruzi</i> | 41  | 1    | 41   |
| Tc00.1047053507875.70  | <i>T. cruzi</i> | 128 | 698  | 825  |
| Tc00.1047053507879.10  | <i>T. cruzi</i> | 42  | 1    | 42   |
| Tc00.1047053507879.10  | <i>T. cruzi</i> | 55  | 700  | 754  |
| Tc00.1047053507879.10  | <i>T. cruzi</i> | 55  | 700  | 754  |

|                        |                 |     |      |      |
|------------------------|-----------------|-----|------|------|
| Tc00.1047053507881.20  | <i>T. cruzi</i> | 44  | 397  | 440  |
| Tc00.1047053507883.40  | <i>T. cruzi</i> | 85  | 276  | 360  |
| Tc00.1047053507883.50  | <i>T. cruzi</i> | 42  | 27   | 68   |
| Tc00.1047053507905.39  | <i>T. cruzi</i> | 274 | 32   | 305  |
| Tc00.1047053507907.20  | <i>T. cruzi</i> | 51  | 1    | 51   |
| Tc00.1047053507907.50  | <i>T. cruzi</i> | 210 | 392  | 601  |
| Tc00.1047053507907.50  | <i>T. cruzi</i> | 59  | 636  | 694  |
| Tc00.1047053507907.50  | <i>T. cruzi</i> | 59  | 636  | 694  |
| Tc00.1047053507921.9   | <i>T. cruzi</i> | 51  | 1598 | 1648 |
| Tc00.1047053507921.9   | <i>T. cruzi</i> | 65  | 2837 | 2901 |
| Tc00.1047053507923.20  | <i>T. cruzi</i> | 50  | 1    | 50   |
| Tc00.1047053507923.30  | <i>T. cruzi</i> | 65  | 1    | 65   |
| Tc00.1047053507925.20  | <i>T. cruzi</i> | 45  | 223  | 267  |
| Tc00.1047053507925.20  | <i>T. cruzi</i> | 48  | 415  | 462  |
| Tc00.1047053507925.20  | <i>T. cruzi</i> | 61  | 1300 | 1360 |
| Tc00.1047053507925.50  | <i>T. cruzi</i> | 43  | 54   | 96   |
| Tc00.1047053507925.50  | <i>T. cruzi</i> | 62  | 522  | 583  |
| Tc00.1047053507925.50  | <i>T. cruzi</i> | 73  | 838  | 910  |
| Tc00.1047053507925.50  | <i>T. cruzi</i> | 51  | 1107 | 1157 |
| Tc00.1047053507925.50  | <i>T. cruzi</i> | 68  | 1239 | 1306 |
| Tc00.1047053507925.50  | <i>T. cruzi</i> | 72  | 1514 | 1585 |
| Tc00.1047053507925.60  | <i>T. cruzi</i> | 43  | 70   | 112  |
| Tc00.1047053507927.10  | <i>T. cruzi</i> | 187 | 89   | 275  |
| Tc00.1047053507927.100 | <i>T. cruzi</i> | 91  | 1    | 91   |
| Tc00.1047053507927.20  | <i>T. cruzi</i> | 405 | 23   | 427  |
| Tc00.1047053507927.20  | <i>T. cruzi</i> | 46  | 518  | 563  |
| Tc00.1047053507927.20  | <i>T. cruzi</i> | 43  | 731  | 773  |
| Tc00.1047053507927.20  | <i>T. cruzi</i> | 90  | 781  | 870  |
| Tc00.1047053507927.4   | <i>T. cruzi</i> | 59  | 56   | 114  |
| Tc00.1047053507927.40  | <i>T. cruzi</i> | 218 | 876  | 1093 |
| Tc00.1047053507927.70  | <i>T. cruzi</i> | 117 | 39   | 155  |
| Tc00.1047053507927.80  | <i>T. cruzi</i> | 76  | 73   | 148  |
| Tc00.1047053507927.80  | <i>T. cruzi</i> | 56  | 154  | 209  |
| Tc00.1047053507927.80  | <i>T. cruzi</i> | 43  | 251  | 293  |
| Tc00.1047053507927.80  | <i>T. cruzi</i> | 66  | 382  | 447  |
| Tc00.1047053507929.10  | <i>T. cruzi</i> | 205 | 361  | 565  |
| Tc00.1047053507929.10  | <i>T. cruzi</i> | 50  | 593  | 642  |
| Tc00.1047053507929.20  | <i>T. cruzi</i> | 116 | 28   | 143  |
| Tc00.1047053507933.10  | <i>T. cruzi</i> | 671 | 1    | 671  |
| Tc00.1047053507933.10  | <i>T. cruzi</i> | 368 | 755  | 1122 |
| Tc00.1047053507933.10  | <i>T. cruzi</i> | 397 | 1190 | 1586 |
| Tc00.1047053507933.10  | <i>T. cruzi</i> | 411 | 1597 | 2007 |
| Tc00.1047053507933.10  | <i>T. cruzi</i> | 57  | 2052 | 2108 |
| Tc00.1047053507933.10  | <i>T. cruzi</i> | 91  | 2233 | 2323 |
| Tc00.1047053507933.20  | <i>T. cruzi</i> | 62  | 63   | 124  |
| Tc00.1047053507939.14  | <i>T. cruzi</i> | 92  | 51   | 142  |
| Tc00.1047053507939.14  | <i>T. cruzi</i> | 59  | 360  | 418  |

|                        |                 |     |      |      |
|------------------------|-----------------|-----|------|------|
| Tc00.1047053507939.30  | <i>T. cruzi</i> | 166 | 1    | 166  |
| Tc00.1047053507939.40  | <i>T. cruzi</i> | 40  | 40   | 79   |
| Tc00.1047053507939.40  | <i>T. cruzi</i> | 88  | 169  | 256  |
| Tc00.1047053507939.40  | <i>T. cruzi</i> | 88  | 169  | 256  |
| Tc00.1047053507939.50  | <i>T. cruzi</i> | 137 | 92   | 228  |
| Tc00.1047053507939.50  | <i>T. cruzi</i> | 252 | 315  | 566  |
| Tc00.1047053507939.50  | <i>T. cruzi</i> | 96  | 646  | 741  |
| Tc00.1047053507941.10  | <i>T. cruzi</i> | 84  | 106  | 189  |
| Tc00.1047053507941.100 | <i>T. cruzi</i> | 47  | 124  | 170  |
| Tc00.1047053507941.100 | <i>T. cruzi</i> | 48  | 478  | 525  |
| Tc00.1047053507941.100 | <i>T. cruzi</i> | 55  | 1033 | 1087 |
| Tc00.1047053507941.120 | <i>T. cruzi</i> | 82  | 73   | 154  |
| Tc00.1047053507941.120 | <i>T. cruzi</i> | 70  | 333  | 402  |
| Tc00.1047053507941.130 | <i>T. cruzi</i> | 134 | 35   | 168  |
| Tc00.1047053507941.30  | <i>T. cruzi</i> | 81  | 33   | 113  |
| Tc00.1047053507941.50  | <i>T. cruzi</i> | 101 | 97   | 197  |
| Tc00.1047053507941.60  | <i>T. cruzi</i> | 96  | 1    | 96   |
| Tc00.1047053507941.70  | <i>T. cruzi</i> | 96  | 187  | 282  |
| Tc00.1047053507941.70  | <i>T. cruzi</i> | 144 | 394  | 537  |
| Tc00.1047053507941.70  | <i>T. cruzi</i> | 52  | 802  | 853  |
| Tc00.1047053507941.80  | <i>T. cruzi</i> | 87  | 51   | 137  |
| Tc00.1047053507953.10  | <i>T. cruzi</i> | 398 | 1    | 398  |
| Tc00.1047053507953.100 | <i>T. cruzi</i> | 48  | 1    | 48   |
| Tc00.1047053507953.100 | <i>T. cruzi</i> | 74  | 114  | 187  |
| Tc00.1047053507953.100 | <i>T. cruzi</i> | 48  | 298  | 345  |
| Tc00.1047053507953.130 | <i>T. cruzi</i> | 64  | 31   | 94   |
| Tc00.1047053507953.140 | <i>T. cruzi</i> | 98  | 1    | 98   |
| Tc00.1047053507953.140 | <i>T. cruzi</i> | 55  | 130  | 184  |
| Tc00.1047053507953.140 | <i>T. cruzi</i> | 55  | 130  | 184  |
| Tc00.1047053507953.170 | <i>T. cruzi</i> | 194 | 93   | 286  |
| Tc00.1047053507953.180 | <i>T. cruzi</i> | 149 | 19   | 167  |
| Tc00.1047053507953.200 | <i>T. cruzi</i> | 258 | 111  | 368  |
| Tc00.1047053507953.210 | <i>T. cruzi</i> | 129 | 1    | 129  |
| Tc00.1047053507953.30  | <i>T. cruzi</i> | 66  | 55   | 120  |
| Tc00.1047053507953.30  | <i>T. cruzi</i> | 71  | 137  | 207  |
| Tc00.1047053507953.40  | <i>T. cruzi</i> | 238 | 23   | 260  |
| Tc00.1047053507953.60  | <i>T. cruzi</i> | 57  | 34   | 90   |
| Tc00.1047053507953.60  | <i>T. cruzi</i> | 117 | 101  | 217  |
| Tc00.1047053507953.70  | <i>T. cruzi</i> | 259 | 108  | 366  |
| Tc00.1047053507953.80  | <i>T. cruzi</i> | 113 | 59   | 171  |
| Tc00.1047053507953.80  | <i>T. cruzi</i> | 87  | 180  | 266  |
| Tc00.1047053507955.20  | <i>T. cruzi</i> | 156 | 48   | 203  |
| Tc00.1047053507957.10  | <i>T. cruzi</i> | 418 | 27   | 444  |
| Tc00.1047053507957.150 | <i>T. cruzi</i> | 331 | 69   | 399  |
| Tc00.1047053507957.160 | <i>T. cruzi</i> | 240 | 28   | 267  |
| Tc00.1047053507957.179 | <i>T. cruzi</i> | 382 | 47   | 428  |
| Tc00.1047053507957.200 | <i>T. cruzi</i> | 458 | 49   | 506  |

|                        |                 |     |      |      |
|------------------------|-----------------|-----|------|------|
| Tc00.1047053507957.210 | <i>T. cruzi</i> | 67  | 84   | 150  |
| Tc00.1047053507957.220 | <i>T. cruzi</i> | 422 | 25   | 446  |
| Tc00.1047053507957.229 | <i>T. cruzi</i> | 195 | 16   | 210  |
| Tc00.1047053507957.240 | <i>T. cruzi</i> | 216 | 86   | 301  |
| Tc00.1047053507957.270 | <i>T. cruzi</i> | 179 | 14   | 192  |
| Tc00.1047053507957.280 | <i>T. cruzi</i> | 240 | 23   | 262  |
| Tc00.1047053507957.300 | <i>T. cruzi</i> | 92  | 96   | 187  |
| Tc00.1047053507957.310 | <i>T. cruzi</i> | 68  | 60   | 127  |
| Tc00.1047053507957.320 | <i>T. cruzi</i> | 224 | 27   | 250  |
| Tc00.1047053507957.50  | <i>T. cruzi</i> | 190 | 26   | 215  |
| Tc00.1047053507957.90  | <i>T. cruzi</i> | 146 | 27   | 172  |
| Tc00.1047053507959.110 | <i>T. cruzi</i> | 317 | 27   | 343  |
| Tc00.1047053507959.140 | <i>T. cruzi</i> | 142 | 21   | 162  |
| Tc00.1047053507959.170 | <i>T. cruzi</i> | 307 | 101  | 407  |
| Tc00.1047053507959.200 | <i>T. cruzi</i> | 141 | 28   | 168  |
| Tc00.1047053507959.210 | <i>T. cruzi</i> | 336 | 27   | 362  |
| Tc00.1047053507959.250 | <i>T. cruzi</i> | 140 | 24   | 163  |
| Tc00.1047053507959.260 | <i>T. cruzi</i> | 225 | 30   | 254  |
| Tc00.1047053507959.270 | <i>T. cruzi</i> | 152 | 19   | 170  |
| Tc00.1047053507959.280 | <i>T. cruzi</i> | 282 | 48   | 329  |
| Tc00.1047053507959.300 | <i>T. cruzi</i> | 268 | 23   | 290  |
| Tc00.1047053507959.310 | <i>T. cruzi</i> | 154 | 24   | 177  |
| Tc00.1047053507959.350 | <i>T. cruzi</i> | 358 | 28   | 385  |
| Tc00.1047053507959.41  | <i>T. cruzi</i> | 152 | 19   | 170  |
| Tc00.1047053507959.80  | <i>T. cruzi</i> | 358 | 28   | 385  |
| Tc00.1047053507959.90  | <i>T. cruzi</i> | 169 | 22   | 190  |
| Tc00.1047053507963.10  | <i>T. cruzi</i> | 40  | 27   | 66   |
| Tc00.1047053507963.10  | <i>T. cruzi</i> | 71  | 196  | 266  |
| Tc00.1047053507963.10  | <i>T. cruzi</i> | 74  | 392  | 465  |
| Tc00.1047053507963.30  | <i>T. cruzi</i> | 48  | 1    | 48   |
| Tc00.1047053507963.30  | <i>T. cruzi</i> | 41  | 110  | 150  |
| Tc00.1047053507963.30  | <i>T. cruzi</i> | 100 | 198  | 297  |
| Tc00.1047053507963.30  | <i>T. cruzi</i> | 54  | 335  | 388  |
| Tc00.1047053507963.30  | <i>T. cruzi</i> | 125 | 395  | 519  |
| Tc00.1047053507963.30  | <i>T. cruzi</i> | 189 | 644  | 832  |
| Tc00.1047053507963.30  | <i>T. cruzi</i> | 69  | 875  | 943  |
| Tc00.1047053507963.30  | <i>T. cruzi</i> | 65  | 1134 | 1198 |
| Tc00.1047053507963.40  | <i>T. cruzi</i> | 101 | 30   | 130  |
| Tc00.1047053507963.40  | <i>T. cruzi</i> | 53  | 167  | 219  |
| Tc00.1047053507963.40  | <i>T. cruzi</i> | 47  | 225  | 271  |
| Tc00.1047053507963.50  | <i>T. cruzi</i> | 52  | 68   | 119  |
| Tc00.1047053507963.50  | <i>T. cruzi</i> | 105 | 156  | 260  |
| Tc00.1047053507963.60  | <i>T. cruzi</i> | 121 | 78   | 198  |
| Tc00.1047053507963.70  | <i>T. cruzi</i> | 368 | 69   | 436  |
| Tc00.1047053507963.70  | <i>T. cruzi</i> | 205 | 460  | 664  |
| Tc00.1047053507963.79  | <i>T. cruzi</i> | 62  | 52   | 113  |
| Tc00.1047053507963.79  | <i>T. cruzi</i> | 156 | 207  | 362  |

|                        |                 |     |      |      |
|------------------------|-----------------|-----|------|------|
| Tc00.1047053507975.40  | <i>T. cruzi</i> | 51  | 1619 | 1669 |
| Tc00.1047053507975.40  | <i>T. cruzi</i> | 70  | 2850 | 2919 |
| Tc00.1047053507975.40  | <i>T. cruzi</i> | 75  | 3397 | 3471 |
| Tc00.1047053507979.10  | <i>T. cruzi</i> | 48  | 125  | 172  |
| Tc00.1047053507979.20  | <i>T. cruzi</i> | 56  | 1    | 56   |
| Tc00.1047053507979.20  | <i>T. cruzi</i> | 84  | 134  | 217  |
| Tc00.1047053507979.30  | <i>T. cruzi</i> | 134 | 658  | 791  |
| Tc00.1047053507979.4   | <i>T. cruzi</i> | 79  | 1    | 79   |
| Tc00.1047053507979.40  | <i>T. cruzi</i> | 79  | 112  | 190  |
| Tc00.1047053507979.40  | <i>T. cruzi</i> | 67  | 337  | 403  |
| Tc00.1047053507979.50  | <i>T. cruzi</i> | 54  | 44   | 97   |
| Tc00.1047053507979.50  | <i>T. cruzi</i> | 117 | 280  | 396  |
| Tc00.1047053507979.50  | <i>T. cruzi</i> | 69  | 430  | 498  |
| Tc00.1047053507979.50  | <i>T. cruzi</i> | 94  | 542  | 635  |
| Tc00.1047053507979.50  | <i>T. cruzi</i> | 336 | 655  | 990  |
| Tc00.1047053507981.20  | <i>T. cruzi</i> | 115 | 57   | 171  |
| Tc00.1047053507981.30  | <i>T. cruzi</i> | 200 | 108  | 307  |
| Tc00.1047053507981.61  | <i>T. cruzi</i> | 55  | 165  | 219  |
| Tc00.1047053507987.20  | <i>T. cruzi</i> | 104 | 57   | 160  |
| Tc00.1047053507987.20  | <i>T. cruzi</i> | 63  | 190  | 252  |
| Tc00.1047053507987.30  | <i>T. cruzi</i> | 209 | 25   | 233  |
| Tc00.1047053507993.10  | <i>T. cruzi</i> | 134 | 1    | 134  |
| Tc00.1047053507993.100 | <i>T. cruzi</i> | 43  | 1    | 43   |
| Tc00.1047053507993.100 | <i>T. cruzi</i> | 56  | 87   | 142  |
| Tc00.1047053507993.100 | <i>T. cruzi</i> | 69  | 145  | 213  |
| Tc00.1047053507993.120 | <i>T. cruzi</i> | 61  | 448  | 508  |
| Tc00.1047053507993.130 | <i>T. cruzi</i> | 107 | 1    | 107  |
| Tc00.1047053507993.130 | <i>T. cruzi</i> | 47  | 250  | 296  |
| Tc00.1047053507993.130 | <i>T. cruzi</i> | 47  | 250  | 296  |
| Tc00.1047053507993.140 | <i>T. cruzi</i> | 346 | 79   | 424  |
| Tc00.1047053507993.180 | <i>T. cruzi</i> | 60  | 527  | 586  |
| Tc00.1047053507993.20  | <i>T. cruzi</i> | 58  | 1    | 58   |
| Tc00.1047053507993.20  | <i>T. cruzi</i> | 80  | 280  | 359  |
| Tc00.1047053507993.20  | <i>T. cruzi</i> | 80  | 280  | 359  |
| Tc00.1047053507993.200 | <i>T. cruzi</i> | 54  | 681  | 734  |
| Tc00.1047053507993.210 | <i>T. cruzi</i> | 51  | 448  | 498  |
| Tc00.1047053507993.250 | <i>T. cruzi</i> | 53  | 125  | 177  |
| Tc00.1047053507993.280 | <i>T. cruzi</i> | 74  | 101  | 174  |
| Tc00.1047053507993.280 | <i>T. cruzi</i> | 107 | 252  | 358  |
| Tc00.1047053507993.280 | <i>T. cruzi</i> | 176 | 453  | 628  |
| Tc00.1047053507993.280 | <i>T. cruzi</i> | 126 | 631  | 756  |
| Tc00.1047053507993.290 | <i>T. cruzi</i> | 43  | 1    | 43   |
| Tc00.1047053507993.290 | <i>T. cruzi</i> | 45  | 115  | 159  |
| Tc00.1047053507993.290 | <i>T. cruzi</i> | 45  | 115  | 159  |
| Tc00.1047053507993.30  | <i>T. cruzi</i> | 73  | 100  | 172  |
| Tc00.1047053507993.310 | <i>T. cruzi</i> | 44  | 1    | 44   |
| Tc00.1047053507993.320 | <i>T. cruzi</i> | 66  | 89   | 154  |

|                        |                 |     |      |      |
|------------------------|-----------------|-----|------|------|
| Tc00.1047053507993.320 | <i>T. cruzi</i> | 53  | 167  | 219  |
| Tc00.1047053507993.320 | <i>T. cruzi</i> | 53  | 167  | 219  |
| Tc00.1047053507993.330 | <i>T. cruzi</i> | 40  | 192  | 231  |
| Tc00.1047053507993.340 | <i>T. cruzi</i> | 54  | 170  | 223  |
| Tc00.1047053507993.350 | <i>T. cruzi</i> | 45  | 253  | 297  |
| Tc00.1047053507993.369 | <i>T. cruzi</i> | 55  | 1    | 55   |
| Tc00.1047053507993.40  | <i>T. cruzi</i> | 236 | 108  | 343  |
| Tc00.1047053507993.60  | <i>T. cruzi</i> | 42  | 87   | 128  |
| Tc00.1047053507993.70  | <i>T. cruzi</i> | 50  | 1    | 50   |
| Tc00.1047053507997.14  | <i>T. cruzi</i> | 43  | 1    | 43   |
| Tc00.1047053507997.30  | <i>T. cruzi</i> | 46  | 1    | 46   |
| Tc00.1047053507997.30  | <i>T. cruzi</i> | 105 | 719  | 823  |
| Tc00.1047053507997.40  | <i>T. cruzi</i> | 46  | 187  | 232  |
| Tc00.1047053507997.50  | <i>T. cruzi</i> | 245 | 109  | 353  |
| Tc00.1047053507997.60  | <i>T. cruzi</i> | 49  | 737  | 785  |
| Tc00.1047053507997.70  | <i>T. cruzi</i> | 43  | 342  | 384  |
| Tc00.1047053507999.10  | <i>T. cruzi</i> | 54  | 1596 | 1649 |
| Tc00.1047053507999.10  | <i>T. cruzi</i> | 75  | 2837 | 2911 |
| Tc00.1047053507999.10  | <i>T. cruzi</i> | 84  | 3381 | 3464 |
| Tc00.1047053508041.40  | <i>T. cruzi</i> | 66  | 174  | 239  |
| Tc00.1047053508041.40  | <i>T. cruzi</i> | 51  | 290  | 340  |
| Tc00.1047053508041.40  | <i>T. cruzi</i> | 51  | 290  | 340  |
| Tc00.1047053508041.50  | <i>T. cruzi</i> | 62  | 367  | 428  |
| Tc00.1047053508041.60  | <i>T. cruzi</i> | 237 | 1    | 237  |
| Tc00.1047053508047.11  | <i>T. cruzi</i> | 46  | 1    | 46   |
| Tc00.1047053508047.11  | <i>T. cruzi</i> | 68  | 108  | 175  |
| Tc00.1047053508047.11  | <i>T. cruzi</i> | 68  | 108  | 175  |
| Tc00.1047053508047.20  | <i>T. cruzi</i> | 311 | 28   | 338  |
| Tc00.1047053508047.40  | <i>T. cruzi</i> | 111 | 148  | 258  |
| Tc00.1047053508047.60  | <i>T. cruzi</i> | 48  | 1    | 48   |
| Tc00.1047053508047.60  | <i>T. cruzi</i> | 47  | 132  | 178  |
| Tc00.1047053508047.60  | <i>T. cruzi</i> | 44  | 310  | 353  |
| Tc00.1047053508047.60  | <i>T. cruzi</i> | 48  | 436  | 483  |
| Tc00.1047053508047.60  | <i>T. cruzi</i> | 169 | 736  | 904  |
| Tc00.1047053508047.70  | <i>T. cruzi</i> | 317 | 67   | 383  |
| Tc00.1047053508049.40  | <i>T. cruzi</i> | 48  | 33   | 80   |
| Tc00.1047053508067.10  | <i>T. cruzi</i> | 41  | 1    | 41   |
| Tc00.1047053508067.10  | <i>T. cruzi</i> | 388 | 92   | 479  |
| Tc00.1047053508067.10  | <i>T. cruzi</i> | 47  | 961  | 1007 |
| Tc00.1047053508075.14  | <i>T. cruzi</i> | 56  | 199  | 254  |
| Tc00.1047053508075.14  | <i>T. cruzi</i> | 62  | 309  | 370  |
| Tc00.1047053508075.14  | <i>T. cruzi</i> | 62  | 309  | 370  |
| Tc00.1047053508075.50  | <i>T. cruzi</i> | 108 | 221  | 328  |
| Tc00.1047053508075.60  | <i>T. cruzi</i> | 53  | 87   | 139  |
| Tc00.1047053508075.60  | <i>T. cruzi</i> | 50  | 209  | 258  |
| Tc00.1047053508075.60  | <i>T. cruzi</i> | 50  | 209  | 258  |
| Tc00.1047053508075.7   | <i>T. cruzi</i> | 45  | 51   | 95   |



|                        |                 |     |     |     |
|------------------------|-----------------|-----|-----|-----|
| Tc00.1047053508081.20  | <i>T. cruzi</i> | 109 | 112 | 220 |
| Tc00.1047053508081.30  | <i>T. cruzi</i> | 202 | 97  | 298 |
| Tc00.1047053508081.40  | <i>T. cruzi</i> | 115 | 57  | 171 |
| Tc00.1047053508081.50  | <i>T. cruzi</i> | 207 | 91  | 297 |
| Tc00.1047053508081.60  | <i>T. cruzi</i> | 109 | 63  | 171 |
| Tc00.1047053508081.70  | <i>T. cruzi</i> | 210 | 91  | 300 |
| Tc00.1047053508081.80  | <i>T. cruzi</i> | 94  | 76  | 169 |
| Tc00.1047053508081.90  | <i>T. cruzi</i> | 204 | 97  | 300 |
| Tc00.1047053508083.10  | <i>T. cruzi</i> | 52  | 47  | 98  |
| Tc00.1047053508083.10  | <i>T. cruzi</i> | 56  | 469 | 524 |
| Tc00.1047053508083.10  | <i>T. cruzi</i> | 56  | 469 | 524 |
| Tc00.1047053508083.20  | <i>T. cruzi</i> | 40  | 112 | 151 |
| Tc00.1047053508083.20  | <i>T. cruzi</i> | 51  | 339 | 389 |
| Tc00.1047053508083.20  | <i>T. cruzi</i> | 51  | 339 | 389 |
| Tc00.1047053508085.20  | <i>T. cruzi</i> | 40  | 63  | 102 |
| Tc00.1047053508087.10  | <i>T. cruzi</i> | 41  | 38  | 78  |
| Tc00.1047053508087.10  | <i>T. cruzi</i> | 66  | 103 | 168 |
| Tc00.1047053508089.10  | <i>T. cruzi</i> | 53  | 645 | 697 |
| Tc00.1047053508089.30  | <i>T. cruzi</i> | 99  | 40  | 138 |
| Tc00.1047053508089.30  | <i>T. cruzi</i> | 60  | 245 | 304 |
| Tc00.1047053508089.71  | <i>T. cruzi</i> | 237 | 1   | 237 |
| Tc00.1047053508095.10  | <i>T. cruzi</i> | 41  | 62  | 102 |
| Tc00.1047053508097.100 | <i>T. cruzi</i> | 134 | 167 | 300 |
| Tc00.1047053508097.60  | <i>T. cruzi</i> | 319 | 29  | 347 |
| Tc00.1047053508097.81  | <i>T. cruzi</i> | 159 | 24  | 182 |
| Tc00.1047053508099.20  | <i>T. cruzi</i> | 205 | 109 | 313 |
| Tc00.1047053508099.30  | <i>T. cruzi</i> | 119 | 50  | 168 |
| Tc00.1047053508099.40  | <i>T. cruzi</i> | 69  | 65  | 133 |
| Tc00.1047053508101.9   | <i>T. cruzi</i> | 53  | 1   | 53  |
| Tc00.1047053508101.9   | <i>T. cruzi</i> | 54  | 126 | 179 |
| Tc00.1047053508101.9   | <i>T. cruzi</i> | 43  | 304 | 346 |
| Tc00.1047053508101.9   | <i>T. cruzi</i> | 41  | 426 | 466 |
| Tc00.1047053508103.30  | <i>T. cruzi</i> | 74  | 35  | 108 |
| Tc00.1047053508103.30  | <i>T. cruzi</i> | 53  | 184 | 236 |
| Tc00.1047053508103.30  | <i>T. cruzi</i> | 42  | 363 | 404 |
| Tc00.1047053508103.30  | <i>T. cruzi</i> | 47  | 786 | 832 |
| Tc00.1047053508107.30  | <i>T. cruzi</i> | 49  | 1   | 49  |
| Tc00.1047053508107.30  | <i>T. cruzi</i> | 54  | 134 | 187 |
| Tc00.1047053508107.30  | <i>T. cruzi</i> | 198 | 742 | 939 |
| Tc00.1047053508109.10  | <i>T. cruzi</i> | 264 | 28  | 291 |
| Tc00.1047053508109.14  | <i>T. cruzi</i> | 167 | 26  | 192 |
| Tc00.1047053508109.20  | <i>T. cruzi</i> | 160 | 25  | 184 |
| Tc00.1047053508109.30  | <i>T. cruzi</i> | 202 | 107 | 308 |
| Tc00.1047053508109.60  | <i>T. cruzi</i> | 43  | 1   | 43  |
| Tc00.1047053508109.60  | <i>T. cruzi</i> | 50  | 122 | 171 |
| Tc00.1047053508109.60  | <i>T. cruzi</i> | 48  | 256 | 303 |
| Tc00.1047053508109.60  | <i>T. cruzi</i> | 193 | 718 | 910 |

|                        |                 |     |      |      |
|------------------------|-----------------|-----|------|------|
| Tc00.1047053508121.110 | <i>T. cruzi</i> | 333 | 30   | 362  |
| Tc00.1047053508121.120 | <i>T. cruzi</i> | 146 | 24   | 169  |
| Tc00.1047053508121.150 | <i>T. cruzi</i> | 42  | 1    | 42   |
| Tc00.1047053508121.150 | <i>T. cruzi</i> | 56  | 253  | 308  |
| Tc00.1047053508121.150 | <i>T. cruzi</i> | 168 | 704  | 871  |
| Tc00.1047053508121.80  | <i>T. cruzi</i> | 179 | 26   | 204  |
| Tc00.1047053508125.100 | <i>T. cruzi</i> | 141 | 29   | 169  |
| Tc00.1047053508125.130 | <i>T. cruzi</i> | 175 | 25   | 199  |
| Tc00.1047053508125.14  | <i>T. cruzi</i> | 199 | 30   | 228  |
| Tc00.1047053508125.140 | <i>T. cruzi</i> | 296 | 72   | 367  |
| Tc00.1047053508125.149 | <i>T. cruzi</i> | 48  | 1    | 48   |
| Tc00.1047053508125.149 | <i>T. cruzi</i> | 42  | 135  | 176  |
| Tc00.1047053508125.149 | <i>T. cruzi</i> | 79  | 279  | 357  |
| Tc00.1047053508125.30  | <i>T. cruzi</i> | 118 | 28   | 145  |
| Tc00.1047053508127.9   | <i>T. cruzi</i> | 74  | 64   | 137  |
| Tc00.1047053508127.9   | <i>T. cruzi</i> | 68  | 234  | 301  |
| Tc00.1047053508131.19  | <i>T. cruzi</i> | 40  | 278  | 317  |
| Tc00.1047053508133.10  | <i>T. cruzi</i> | 190 | 75   | 264  |
| Tc00.1047053508133.10  | <i>T. cruzi</i> | 85  | 271  | 355  |
| Tc00.1047053508133.19  | <i>T. cruzi</i> | 61  | 1    | 61   |
| Tc00.1047053508133.19  | <i>T. cruzi</i> | 51  | 157  | 207  |
| Tc00.1047053508137.20  | <i>T. cruzi</i> | 59  | 1    | 59   |
| Tc00.1047053508137.30  | <i>T. cruzi</i> | 46  | 1    | 46   |
| Tc00.1047053508143.80  | <i>T. cruzi</i> | 369 | 28   | 396  |
| Tc00.1047053508145.49  | <i>T. cruzi</i> | 60  | 1    | 60   |
| Tc00.1047053508145.49  | <i>T. cruzi</i> | 44  | 144  | 187  |
| Tc00.1047053508145.49  | <i>T. cruzi</i> | 69  | 228  | 296  |
| Tc00.1047053508145.49  | <i>T. cruzi</i> | 44  | 404  | 447  |
| Tc00.1047053508145.49  | <i>T. cruzi</i> | 62  | 562  | 623  |
| Tc00.1047053508145.49  | <i>T. cruzi</i> | 55  | 849  | 903  |
| Tc00.1047053508145.49  | <i>T. cruzi</i> | 128 | 1510 | 1637 |
| Tc00.1047053508145.49  | <i>T. cruzi</i> | 54  | 1754 | 1807 |
| Tc00.1047053508145.49  | <i>T. cruzi</i> | 65  | 1900 | 1964 |
| Tc00.1047053508147.140 | <i>T. cruzi</i> | 132 | 27   | 158  |
| Tc00.1047053508147.150 | <i>T. cruzi</i> | 339 | 30   | 368  |
| Tc00.1047053508147.20  | <i>T. cruzi</i> | 71  | 331  | 401  |
| Tc00.1047053508147.20  | <i>T. cruzi</i> | 51  | 881  | 931  |
| Tc00.1047053508147.75  | <i>T. cruzi</i> | 109 | 23   | 131  |
| Tc00.1047053508147.79  | <i>T. cruzi</i> | 198 | 1    | 198  |
| Tc00.1047053508149.65  | <i>T. cruzi</i> | 131 | 62   | 192  |
| Tc00.1047053508149.70  | <i>T. cruzi</i> | 229 | 28   | 256  |
| Tc00.1047053508151.10  | <i>T. cruzi</i> | 174 | 20   | 193  |
| Tc00.1047053508151.20  | <i>T. cruzi</i> | 353 | 44   | 396  |
| Tc00.1047053508157.20  | <i>T. cruzi</i> | 327 | 70   | 396  |
| Tc00.1047053508157.30  | <i>T. cruzi</i> | 40  | 16   | 55   |
| Tc00.1047053508157.40  | <i>T. cruzi</i> | 100 | 40   | 139  |
| Tc00.1047053508159.40  | <i>T. cruzi</i> | 56  | 237  | 292  |

|                        |                 |     |      |      |
|------------------------|-----------------|-----|------|------|
| Tc00.1047053508159.40  | <i>T. cruzi</i> | 49  | 1622 | 1670 |
| Tc00.1047053508159.40  | <i>T. cruzi</i> | 76  | 2857 | 2932 |
| Tc00.1047053508159.40  | <i>T. cruzi</i> | 82  | 3401 | 3482 |
| Tc00.1047053508159.60  | <i>T. cruzi</i> | 163 | 18   | 180  |
| Tc00.1047053508159.70  | <i>T. cruzi</i> | 107 | 1    | 107  |
| Tc00.1047053508161.10  | <i>T. cruzi</i> | 276 | 30   | 305  |
| Tc00.1047053508161.20  | <i>T. cruzi</i> | 44  | 1    | 44   |
| Tc00.1047053508161.20  | <i>T. cruzi</i> | 47  | 132  | 178  |
| Tc00.1047053508161.20  | <i>T. cruzi</i> | 110 | 726  | 835  |
| Tc00.1047053508161.30  | <i>T. cruzi</i> | 315 | 21   | 335  |
| Tc00.1047053508163.140 | <i>T. cruzi</i> | 415 | 28   | 442  |
| Tc00.1047053508163.190 | <i>T. cruzi</i> | 42  | 249  | 290  |
| Tc00.1047053508163.190 | <i>T. cruzi</i> | 49  | 1621 | 1669 |
| Tc00.1047053508163.190 | <i>T. cruzi</i> | 78  | 2852 | 2929 |
| Tc00.1047053508163.190 | <i>T. cruzi</i> | 82  | 3403 | 3484 |
| Tc00.1047053508163.20  | <i>T. cruzi</i> | 141 | 27   | 167  |
| Tc00.1047053508163.230 | <i>T. cruzi</i> | 313 | 23   | 335  |
| Tc00.1047053508163.234 | <i>T. cruzi</i> | 176 | 108  | 283  |
| Tc00.1047053508163.240 | <i>T. cruzi</i> | 113 | 59   | 171  |
| Tc00.1047053508163.250 | <i>T. cruzi</i> | 47  | 1    | 47   |
| Tc00.1047053508163.250 | <i>T. cruzi</i> | 44  | 270  | 313  |
| Tc00.1047053508163.250 | <i>T. cruzi</i> | 47  | 421  | 467  |
| Tc00.1047053508163.250 | <i>T. cruzi</i> | 222 | 719  | 940  |
| Tc00.1047053508163.270 | <i>T. cruzi</i> | 415 | 51   | 465  |
| Tc00.1047053508163.280 | <i>T. cruzi</i> | 164 | 27   | 190  |
| Tc00.1047053508163.30  | <i>T. cruzi</i> | 96  | 79   | 174  |
| Tc00.1047053508163.310 | <i>T. cruzi</i> | 163 | 29   | 191  |
| Tc00.1047053508163.320 | <i>T. cruzi</i> | 341 | 78   | 418  |
| Tc00.1047053508163.330 | <i>T. cruzi</i> | 43  | 267  | 309  |
| Tc00.1047053508163.330 | <i>T. cruzi</i> | 148 | 543  | 690  |
| Tc00.1047053508163.360 | <i>T. cruzi</i> | 51  | 242  | 292  |
| Tc00.1047053508163.360 | <i>T. cruzi</i> | 51  | 1618 | 1668 |
| Tc00.1047053508163.360 | <i>T. cruzi</i> | 77  | 2852 | 2928 |
| Tc00.1047053508163.360 | <i>T. cruzi</i> | 82  | 3402 | 3483 |
| Tc00.1047053508163.400 | <i>T. cruzi</i> | 120 | 124  | 243  |
| Tc00.1047053508163.50  | <i>T. cruzi</i> | 304 | 27   | 330  |
| Tc00.1047053508163.70  | <i>T. cruzi</i> | 47  | 241  | 287  |
| Tc00.1047053508163.70  | <i>T. cruzi</i> | 49  | 1621 | 1669 |
| Tc00.1047053508163.70  | <i>T. cruzi</i> | 65  | 2855 | 2919 |
| Tc00.1047053508163.70  | <i>T. cruzi</i> | 82  | 3399 | 3480 |
| Tc00.1047053508165.100 | <i>T. cruzi</i> | 214 | 16   | 229  |
| Tc00.1047053508165.110 | <i>T. cruzi</i> | 200 | 104  | 303  |
| Tc00.1047053508165.120 | <i>T. cruzi</i> | 370 | 47   | 416  |
| Tc00.1047053508165.130 | <i>T. cruzi</i> | 61  | 251  | 311  |
| Tc00.1047053508165.130 | <i>T. cruzi</i> | 140 | 546  | 685  |
| Tc00.1047053508165.14  | <i>T. cruzi</i> | 46  | 1    | 46   |
| Tc00.1047053508165.14  | <i>T. cruzi</i> | 70  | 116  | 185  |

|                        |                 |     |     |      |
|------------------------|-----------------|-----|-----|------|
| Tc00.1047053508165.14  | <i>T. cruzi</i> | 49  | 299 | 347  |
| Tc00.1047053508165.14  | <i>T. cruzi</i> | 45  | 610 | 654  |
| Tc00.1047053508165.150 | <i>T. cruzi</i> | 433 | 33  | 465  |
| Tc00.1047053508165.170 | <i>T. cruzi</i> | 360 | 29  | 388  |
| Tc00.1047053508165.210 | <i>T. cruzi</i> | 364 | 29  | 392  |
| Tc00.1047053508165.250 | <i>T. cruzi</i> | 43  | 193 | 235  |
| Tc00.1047053508165.270 | <i>T. cruzi</i> | 150 | 33  | 182  |
| Tc00.1047053508165.280 | <i>T. cruzi</i> | 368 | 97  | 464  |
| Tc00.1047053508165.290 | <i>T. cruzi</i> | 157 | 15  | 171  |
| Tc00.1047053508165.30  | <i>T. cruzi</i> | 342 | 28  | 369  |
| Tc00.1047053508165.300 | <i>T. cruzi</i> | 290 | 25  | 314  |
| Tc00.1047053508165.310 | <i>T. cruzi</i> | 64  | 250 | 313  |
| Tc00.1047053508165.310 | <i>T. cruzi</i> | 165 | 544 | 708  |
| Tc00.1047053508165.350 | <i>T. cruzi</i> | 299 | 28  | 326  |
| Tc00.1047053508165.380 | <i>T. cruzi</i> | 152 | 137 | 288  |
| Tc00.1047053508165.400 | <i>T. cruzi</i> | 132 | 25  | 156  |
| Tc00.1047053508165.410 | <i>T. cruzi</i> | 297 | 30  | 326  |
| Tc00.1047053508165.420 | <i>T. cruzi</i> | 303 | 27  | 329  |
| Tc00.1047053508165.50  | <i>T. cruzi</i> | 240 | 36  | 275  |
| Tc00.1047053508165.60  | <i>T. cruzi</i> | 157 | 15  | 171  |
| Tc00.1047053508165.80  | <i>T. cruzi</i> | 134 | 264 | 397  |
| Tc00.1047053508167.20  | <i>T. cruzi</i> | 132 | 29  | 160  |
| Tc00.1047053508167.29  | <i>T. cruzi</i> | 193 | 26  | 218  |
| Tc00.1047053508169.100 | <i>T. cruzi</i> | 120 | 1   | 120  |
| Tc00.1047053508169.100 | <i>T. cruzi</i> | 76  | 131 | 206  |
| Tc00.1047053508169.100 | <i>T. cruzi</i> | 102 | 545 | 646  |
| Tc00.1047053508169.110 | <i>T. cruzi</i> | 52  | 136 | 187  |
| Tc00.1047053508169.120 | <i>T. cruzi</i> | 41  | 175 | 215  |
| Tc00.1047053508169.20  | <i>T. cruzi</i> | 44  | 472 | 515  |
| Tc00.1047053508169.80  | <i>T. cruzi</i> | 89  | 1   | 89   |
| Tc00.1047053508169.80  | <i>T. cruzi</i> | 108 | 125 | 232  |
| Tc00.1047053508169.80  | <i>T. cruzi</i> | 108 | 125 | 232  |
| Tc00.1047053508169.90  | <i>T. cruzi</i> | 41  | 449 | 489  |
| Tc00.1047053508179.30  | <i>T. cruzi</i> | 41  | 34  | 74   |
| Tc00.1047053508179.30  | <i>T. cruzi</i> | 69  | 139 | 207  |
| Tc00.1047053508179.30  | <i>T. cruzi</i> | 263 | 221 | 483  |
| Tc00.1047053508179.30  | <i>T. cruzi</i> | 55  | 526 | 580  |
| Tc00.1047053508179.30  | <i>T. cruzi</i> | 67  | 819 | 885  |
| Tc00.1047053508179.30  | <i>T. cruzi</i> | 96  | 922 | 1017 |
| Tc00.1047053508179.40  | <i>T. cruzi</i> | 41  | 1   | 41   |
| Tc00.1047053508179.40  | <i>T. cruzi</i> | 49  | 213 | 261  |
| Tc00.1047053508179.40  | <i>T. cruzi</i> | 50  | 517 | 566  |
| Tc00.1047053508179.50  | <i>T. cruzi</i> | 173 | 32  | 204  |
| Tc00.1047053508179.60  | <i>T. cruzi</i> | 174 | 1   | 174  |
| Tc00.1047053508179.60  | <i>T. cruzi</i> | 44  | 657 | 700  |
| Tc00.1047053508179.60  | <i>T. cruzi</i> | 44  | 657 | 700  |
| Tc00.1047053508179.70  | <i>T. cruzi</i> | 44  | 1   | 44   |

|                        |                 |     |      |      |
|------------------------|-----------------|-----|------|------|
| Tc00.1047053508181.10  | <i>T. cruzi</i> | 52  | 14   | 65   |
| Tc00.1047053508181.10  | <i>T. cruzi</i> | 48  | 144  | 191  |
| Tc00.1047053508181.10  | <i>T. cruzi</i> | 70  | 225  | 294  |
| Tc00.1047053508181.110 | <i>T. cruzi</i> | 157 | 139  | 295  |
| Tc00.1047053508181.110 | <i>T. cruzi</i> | 130 | 573  | 702  |
| Tc00.1047053508181.110 | <i>T. cruzi</i> | 63  | 729  | 791  |
| Tc00.1047053508181.110 | <i>T. cruzi</i> | 91  | 811  | 901  |
| Tc00.1047053508181.120 | <i>T. cruzi</i> | 110 | 26   | 135  |
| Tc00.1047053508181.120 | <i>T. cruzi</i> | 58  | 742  | 799  |
| Tc00.1047053508181.124 | <i>T. cruzi</i> | 68  | 64   | 131  |
| Tc00.1047053508181.124 | <i>T. cruzi</i> | 107 | 186  | 292  |
| Tc00.1047053508181.124 | <i>T. cruzi</i> | 49  | 407  | 455  |
| Tc00.1047053508181.130 | <i>T. cruzi</i> | 74  | 291  | 364  |
| Tc00.1047053508181.20  | <i>T. cruzi</i> | 237 | 1    | 237  |
| Tc00.1047053508181.20  | <i>T. cruzi</i> | 124 | 365  | 488  |
| Tc00.1047053508181.20  | <i>T. cruzi</i> | 43  | 871  | 913  |
| Tc00.1047053508181.30  | <i>T. cruzi</i> | 115 | 1    | 115  |
| Tc00.1047053508181.30  | <i>T. cruzi</i> | 86  | 136  | 221  |
| Tc00.1047053508181.30  | <i>T. cruzi</i> | 254 | 294  | 547  |
| Tc00.1047053508181.30  | <i>T. cruzi</i> | 203 | 599  | 801  |
| Tc00.1047053508181.30  | <i>T. cruzi</i> | 69  | 907  | 975  |
| Tc00.1047053508181.30  | <i>T. cruzi</i> | 52  | 1005 | 1056 |
| Tc00.1047053508181.30  | <i>T. cruzi</i> | 69  | 1061 | 1129 |
| Tc00.1047053508181.30  | <i>T. cruzi</i> | 69  | 1145 | 1213 |
| Tc00.1047053508181.30  | <i>T. cruzi</i> | 107 | 1257 | 1363 |
| Tc00.1047053508181.30  | <i>T. cruzi</i> | 189 | 1517 | 1705 |
| Tc00.1047053508181.4   | <i>T. cruzi</i> | 81  | 135  | 215  |
| Tc00.1047053508181.4   | <i>T. cruzi</i> | 44  | 330  | 373  |
| Tc00.1047053508181.4   | <i>T. cruzi</i> | 44  | 330  | 373  |
| Tc00.1047053508181.40  | <i>T. cruzi</i> | 52  | 560  | 611  |
| Tc00.1047053508181.60  | <i>T. cruzi</i> | 91  | 50   | 140  |
| Tc00.1047053508181.60  | <i>T. cruzi</i> | 53  | 598  | 650  |
| Tc00.1047053508181.60  | <i>T. cruzi</i> | 115 | 738  | 852  |
| Tc00.1047053508181.70  | <i>T. cruzi</i> | 109 | 1    | 109  |
| Tc00.1047053508181.70  | <i>T. cruzi</i> | 295 | 119  | 413  |
| Tc00.1047053508181.70  | <i>T. cruzi</i> | 107 | 468  | 574  |
| Tc00.1047053508181.70  | <i>T. cruzi</i> | 439 | 898  | 1336 |
| Tc00.1047053508181.70  | <i>T. cruzi</i> | 43  | 1369 | 1411 |
| Tc00.1047053508181.70  | <i>T. cruzi</i> | 56  | 1462 | 1517 |
| Tc00.1047053508181.70  | <i>T. cruzi</i> | 75  | 1571 | 1645 |
| Tc00.1047053508181.80  | <i>T. cruzi</i> | 55  | 614  | 668  |
| Tc00.1047053508181.80  | <i>T. cruzi</i> | 42  | 1034 | 1075 |
| Tc00.1047053508181.80  | <i>T. cruzi</i> | 42  | 1034 | 1075 |
| Tc00.1047053508183.29  | <i>T. cruzi</i> | 59  | 185  | 243  |
| Tc00.1047053508201.30  | <i>T. cruzi</i> | 205 | 58   | 262  |
| Tc00.1047053508201.40  | <i>T. cruzi</i> | 237 | 28   | 264  |
| Tc00.1047053508205.10  | <i>T. cruzi</i> | 121 | 1    | 121  |

|                        |                 |     |     |     |
|------------------------|-----------------|-----|-----|-----|
| Tc00.1047053508205.20  | <i>T. cruzi</i> | 52  | 1   | 52  |
| Tc00.1047053508205.20  | <i>T. cruzi</i> | 77  | 584 | 660 |
| Tc00.1047053508205.30  | <i>T. cruzi</i> | 86  | 330 | 415 |
| Tc00.1047053508205.4   | <i>T. cruzi</i> | 42  | 8   | 49  |
| Tc00.1047053508207.100 | <i>T. cruzi</i> | 62  | 1   | 62  |
| Tc00.1047053508207.110 | <i>T. cruzi</i> | 62  | 1   | 62  |
| Tc00.1047053508207.150 | <i>T. cruzi</i> | 53  | 245 | 297 |
| Tc00.1047053508207.170 | <i>T. cruzi</i> | 52  | 28  | 79  |
| Tc00.1047053508207.170 | <i>T. cruzi</i> | 57  | 128 | 184 |
| Tc00.1047053508207.170 | <i>T. cruzi</i> | 125 | 348 | 472 |
| Tc00.1047053508207.194 | <i>T. cruzi</i> | 45  | 1   | 45  |
| Tc00.1047053508207.194 | <i>T. cruzi</i> | 90  | 173 | 262 |
| Tc00.1047053508207.194 | <i>T. cruzi</i> | 51  | 451 | 501 |
| Tc00.1047053508207.200 | <i>T. cruzi</i> | 43  | 46  | 88  |
| Tc00.1047053508207.220 | <i>T. cruzi</i> | 63  | 26  | 88  |
| Tc00.1047053508207.220 | <i>T. cruzi</i> | 46  | 155 | 200 |
| Tc00.1047053508207.230 | <i>T. cruzi</i> | 62  | 63  | 124 |
| Tc00.1047053508207.250 | <i>T. cruzi</i> | 69  | 27  | 95  |
| Tc00.1047053508207.270 | <i>T. cruzi</i> | 41  | 566 | 606 |
| Tc00.1047053508207.31  | <i>T. cruzi</i> | 79  | 68  | 146 |
| Tc00.1047053508207.40  | <i>T. cruzi</i> | 96  | 73  | 168 |
| Tc00.1047053508207.45  | <i>T. cruzi</i> | 63  | 21  | 83  |
| Tc00.1047053508207.45  | <i>T. cruzi</i> | 86  | 286 | 371 |
| Tc00.1047053508207.45  | <i>T. cruzi</i> | 86  | 286 | 371 |
| Tc00.1047053508207.80  | <i>T. cruzi</i> | 62  | 153 | 214 |
| Tc00.1047053508207.90  | <i>T. cruzi</i> | 98  | 1   | 98  |
| Tc00.1047053508207.90  | <i>T. cruzi</i> | 78  | 126 | 203 |
| Tc00.1047053508207.90  | <i>T. cruzi</i> | 78  | 126 | 203 |
| Tc00.1047053508209.140 | <i>T. cruzi</i> | 72  | 241 | 312 |
| Tc00.1047053508209.150 | <i>T. cruzi</i> | 46  | 212 | 257 |
| Tc00.1047053508209.159 | <i>T. cruzi</i> | 113 | 46  | 158 |
| Tc00.1047053508209.30  | <i>T. cruzi</i> | 113 | 1   | 113 |
| Tc00.1047053508209.30  | <i>T. cruzi</i> | 74  | 334 | 407 |
| Tc00.1047053508209.39  | <i>T. cruzi</i> | 147 | 95  | 241 |
| Tc00.1047053508209.60  | <i>T. cruzi</i> | 64  | 1   | 64  |
| Tc00.1047053508209.60  | <i>T. cruzi</i> | 49  | 101 | 149 |
| Tc00.1047053508209.60  | <i>T. cruzi</i> | 80  | 379 | 458 |
| Tc00.1047053508209.70  | <i>T. cruzi</i> | 213 | 1   | 213 |
| Tc00.1047053508209.70  | <i>T. cruzi</i> | 126 | 240 | 365 |
| Tc00.1047053508209.80  | <i>T. cruzi</i> | 51  | 47  | 97  |
| Tc00.1047053508209.80  | <i>T. cruzi</i> | 46  | 170 | 215 |
| Tc00.1047053508209.80  | <i>T. cruzi</i> | 46  | 170 | 215 |
| Tc00.1047053508209.94  | <i>T. cruzi</i> | 104 | 103 | 206 |
| Tc00.1047053508209.94  | <i>T. cruzi</i> | 58  | 253 | 310 |
| Tc00.1047053508211.10  | <i>T. cruzi</i> | 56  | 252 | 307 |
| Tc00.1047053508211.19  | <i>T. cruzi</i> | 105 | 54  | 158 |
| Tc00.1047053508211.30  | <i>T. cruzi</i> | 48  | 1   | 48  |

|                        |                 |     |     |      |
|------------------------|-----------------|-----|-----|------|
| Tc00.1047053508211.30  | <i>T. cruzi</i> | 84  | 92  | 175  |
| Tc00.1047053508211.30  | <i>T. cruzi</i> | 99  | 318 | 416  |
| Tc00.1047053508211.40  | <i>T. cruzi</i> | 40  | 158 | 197  |
| Tc00.1047053508211.40  | <i>T. cruzi</i> | 80  | 200 | 279  |
| Tc00.1047053508211.40  | <i>T. cruzi</i> | 80  | 200 | 279  |
| Tc00.1047053508211.50  | <i>T. cruzi</i> | 52  | 184 | 235  |
| Tc00.1047053508211.50  | <i>T. cruzi</i> | 62  | 354 | 415  |
| Tc00.1047053508211.50  | <i>T. cruzi</i> | 159 | 432 | 590  |
| Tc00.1047053508211.50  | <i>T. cruzi</i> | 166 | 861 | 1026 |
| Tc00.1047053508211.70  | <i>T. cruzi</i> | 97  | 64  | 160  |
| Tc00.1047053508211.70  | <i>T. cruzi</i> | 48  | 268 | 315  |
| Tc00.1047053508213.30  | <i>T. cruzi</i> | 251 | 1   | 251  |
| Tc00.1047053508213.40  | <i>T. cruzi</i> | 68  | 40  | 107  |
| Tc00.1047053508213.9   | <i>T. cruzi</i> | 73  | 143 | 215  |
| Tc00.1047053508215.3   | <i>T. cruzi</i> | 93  | 1   | 93   |
| Tc00.1047053508215.3   | <i>T. cruzi</i> | 278 | 129 | 406  |
| Tc00.1047053508215.9   | <i>T. cruzi</i> | 119 | 118 | 236  |
| Tc00.1047053508215.9   | <i>T. cruzi</i> | 87  | 279 | 365  |
| Tc00.1047053508215.9   | <i>T. cruzi</i> | 87  | 279 | 365  |
| Tc00.1047053508225.4   | <i>T. cruzi</i> | 47  | 1   | 47   |
| Tc00.1047053508225.4   | <i>T. cruzi</i> | 63  | 66  | 128  |
| Tc00.1047053508225.4   | <i>T. cruzi</i> | 63  | 66  | 128  |
| Tc00.1047053508227.10  | <i>T. cruzi</i> | 77  | 34  | 110  |
| Tc00.1047053508227.10  | <i>T. cruzi</i> | 63  | 118 | 180  |
| Tc00.1047053508227.20  | <i>T. cruzi</i> | 246 | 26  | 271  |
| Tc00.1047053508227.30  | <i>T. cruzi</i> | 180 | 19  | 198  |
| Tc00.1047053508227.40  | <i>T. cruzi</i> | 296 | 28  | 323  |
| Tc00.1047053508229.20  | <i>T. cruzi</i> | 113 | 110 | 222  |
| Tc00.1047053508229.20  | <i>T. cruzi</i> | 93  | 225 | 317  |
| Tc00.1047053508229.30  | <i>T. cruzi</i> | 240 | 25  | 264  |
| Tc00.1047053508229.40  | <i>T. cruzi</i> | 42  | 1   | 42   |
| Tc00.1047053508229.40  | <i>T. cruzi</i> | 41  | 125 | 165  |
| Tc00.1047053508229.40  | <i>T. cruzi</i> | 57  | 270 | 326  |
| Tc00.1047053508229.40  | <i>T. cruzi</i> | 96  | 692 | 787  |
| Tc00.1047053508229.60  | <i>T. cruzi</i> | 42  | 1   | 42   |
| Tc00.1047053508229.60  | <i>T. cruzi</i> | 270 | 737 | 1006 |
| Tc00.1047053508239.20  | <i>T. cruzi</i> | 192 | 29  | 220  |
| Tc00.1047053508239.20  | <i>T. cruzi</i> | 82  | 243 | 324  |
| Tc00.1047053508239.20  | <i>T. cruzi</i> | 50  | 696 | 745  |
| Tc00.1047053508239.49  | <i>T. cruzi</i> | 65  | 1   | 65   |
| Tc00.1047053508239.49  | <i>T. cruzi</i> | 141 | 135 | 275  |
| Tc00.1047053508239.49  | <i>T. cruzi</i> | 141 | 135 | 275  |
| Tc00.1047053508241.100 | <i>T. cruzi</i> | 70  | 531 | 600  |
| Tc00.1047053508241.100 | <i>T. cruzi</i> | 40  | 824 | 863  |
| Tc00.1047053508241.100 | <i>T. cruzi</i> | 40  | 824 | 863  |
| Tc00.1047053508241.120 | <i>T. cruzi</i> | 58  | 915 | 972  |
| Tc00.1047053508241.130 | <i>T. cruzi</i> | 73  | 157 | 229  |

|                        |                 |     |      |      |
|------------------------|-----------------|-----|------|------|
| Tc00.1047053508241.140 | <i>T. cruzi</i> | 46  | 339  | 384  |
| Tc00.1047053508241.30  | <i>T. cruzi</i> | 60  | 1    | 60   |
| Tc00.1047053508241.80  | <i>T. cruzi</i> | 40  | 113  | 152  |
| Tc00.1047053508241.90  | <i>T. cruzi</i> | 108 | 1    | 108  |
| Tc00.1047053508241.90  | <i>T. cruzi</i> | 42  | 301  | 342  |
| Tc00.1047053508241.90  | <i>T. cruzi</i> | 41  | 436  | 476  |
| Tc00.1047053508265.100 | <i>T. cruzi</i> | 82  | 47   | 128  |
| Tc00.1047053508265.100 | <i>T. cruzi</i> | 591 | 576  | 1166 |
| Tc00.1047053508265.30  | <i>T. cruzi</i> | 70  | 432  | 501  |
| Tc00.1047053508265.30  | <i>T. cruzi</i> | 89  | 547  | 635  |
| Tc00.1047053508265.30  | <i>T. cruzi</i> | 89  | 547  | 635  |
| Tc00.1047053508265.40  | <i>T. cruzi</i> | 172 | 1    | 172  |
| Tc00.1047053508265.40  | <i>T. cruzi</i> | 68  | 223  | 290  |
| Tc00.1047053508265.40  | <i>T. cruzi</i> | 56  | 408  | 463  |
| Tc00.1047053508265.70  | <i>T. cruzi</i> | 95  | 116  | 210  |
| Tc00.1047053508265.80  | <i>T. cruzi</i> | 40  | 347  | 386  |
| Tc00.1047053508271.20  | <i>T. cruzi</i> | 241 | 1    | 241  |
| Tc00.1047053508271.30  | <i>T. cruzi</i> | 67  | 1    | 67   |
| Tc00.1047053508271.50  | <i>T. cruzi</i> | 146 | 1    | 146  |
| Tc00.1047053508271.50  | <i>T. cruzi</i> | 42  | 204  | 245  |
| Tc00.1047053508271.50  | <i>T. cruzi</i> | 46  | 283  | 328  |
| Tc00.1047053508277.130 | <i>T. cruzi</i> | 52  | 88   | 139  |
| Tc00.1047053508277.180 | <i>T. cruzi</i> | 64  | 155  | 218  |
| Tc00.1047053508277.180 | <i>T. cruzi</i> | 79  | 864  | 942  |
| Tc00.1047053508277.180 | <i>T. cruzi</i> | 79  | 864  | 942  |
| Tc00.1047053508277.190 | <i>T. cruzi</i> | 67  | 350  | 416  |
| Tc00.1047053508277.190 | <i>T. cruzi</i> | 87  | 449  | 535  |
| Tc00.1047053508277.200 | <i>T. cruzi</i> | 88  | 212  | 299  |
| Tc00.1047053508277.230 | <i>T. cruzi</i> | 81  | 416  | 496  |
| Tc00.1047053508277.290 | <i>T. cruzi</i> | 71  | 1    | 71   |
| Tc00.1047053508277.290 | <i>T. cruzi</i> | 77  | 118  | 194  |
| Tc00.1047053508277.290 | <i>T. cruzi</i> | 45  | 451  | 495  |
| Tc00.1047053508277.30  | <i>T. cruzi</i> | 61  | 32   | 92   |
| Tc00.1047053508277.300 | <i>T. cruzi</i> | 116 | 49   | 164  |
| Tc00.1047053508277.320 | <i>T. cruzi</i> | 50  | 119  | 168  |
| Tc00.1047053508277.320 | <i>T. cruzi</i> | 64  | 205  | 268  |
| Tc00.1047053508277.320 | <i>T. cruzi</i> | 64  | 205  | 268  |
| Tc00.1047053508277.340 | <i>T. cruzi</i> | 95  | 65   | 159  |
| Tc00.1047053508277.340 | <i>T. cruzi</i> | 54  | 344  | 397  |
| Tc00.1047053508277.340 | <i>T. cruzi</i> | 138 | 506  | 643  |
| Tc00.1047053508277.340 | <i>T. cruzi</i> | 46  | 972  | 1017 |
| Tc00.1047053508277.350 | <i>T. cruzi</i> | 164 | 1    | 164  |
| Tc00.1047053508277.350 | <i>T. cruzi</i> | 45  | 499  | 543  |
| Tc00.1047053508277.360 | <i>T. cruzi</i> | 60  | 1    | 60   |
| Tc00.1047053508277.360 | <i>T. cruzi</i> | 69  | 294  | 362  |
| Tc00.1047053508277.360 | <i>T. cruzi</i> | 67  | 888  | 954  |
| Tc00.1047053508277.370 | <i>T. cruzi</i> | 107 | 1101 | 1207 |



|                        |                 |     |      |      |
|------------------------|-----------------|-----|------|------|
| Tc00.1047053508277.380 | <i>T. cruzi</i> | 127 | 68   | 194  |
| Tc00.1047053508277.380 | <i>T. cruzi</i> | 106 | 202  | 307  |
| Tc00.1047053508277.380 | <i>T. cruzi</i> | 181 | 345  | 525  |
| Tc00.1047053508277.380 | <i>T. cruzi</i> | 93  | 574  | 666  |
| Tc00.1047053508277.380 | <i>T. cruzi</i> | 88  | 734  | 821  |
| Tc00.1047053508277.380 | <i>T. cruzi</i> | 48  | 925  | 972  |
| Tc00.1047053508277.380 | <i>T. cruzi</i> | 44  | 1140 | 1183 |
| Tc00.1047053508277.390 | <i>T. cruzi</i> | 48  | 237  | 284  |
| Tc00.1047053508277.401 | <i>T. cruzi</i> | 214 | 54   | 267  |
| Tc00.1047053508277.50  | <i>T. cruzi</i> | 51  | 223  | 273  |
| Tc00.1047053508283.10  | <i>T. cruzi</i> | 56  | 1588 | 1643 |
| Tc00.1047053508283.10  | <i>T. cruzi</i> | 68  | 2833 | 2900 |
| Tc00.1047053508283.10  | <i>T. cruzi</i> | 74  | 3381 | 3454 |
| Tc00.1047053508283.69  | <i>T. cruzi</i> | 52  | 1626 | 1677 |
| Tc00.1047053508285.60  | <i>T. cruzi</i> | 45  | 1    | 45   |
| Tc00.1047053508285.60  | <i>T. cruzi</i> | 64  | 66   | 129  |
| Tc00.1047053508285.60  | <i>T. cruzi</i> | 57  | 711  | 767  |
| Tc00.1047053508307.10  | <i>T. cruzi</i> | 54  | 208  | 261  |
| Tc00.1047053508307.10  | <i>T. cruzi</i> | 76  | 413  | 488  |
| Tc00.1047053508307.10  | <i>T. cruzi</i> | 76  | 413  | 488  |
| Tc00.1047053508307.110 | <i>T. cruzi</i> | 168 | 375  | 542  |
| Tc00.1047053508307.110 | <i>T. cruzi</i> | 144 | 634  | 777  |
| Tc00.1047053508307.120 | <i>T. cruzi</i> | 54  | 405  | 458  |
| Tc00.1047053508307.120 | <i>T. cruzi</i> | 319 | 750  | 1068 |
| Tc00.1047053508307.125 | <i>T. cruzi</i> | 52  | 31   | 82   |
| Tc00.1047053508307.130 | <i>T. cruzi</i> | 127 | 419  | 545  |
| Tc00.1047053508307.134 | <i>T. cruzi</i> | 56  | 194  | 249  |
| Tc00.1047053508307.140 | <i>T. cruzi</i> | 731 | 457  | 1187 |
| Tc00.1047053508307.140 | <i>T. cruzi</i> | 64  | 1205 | 1268 |
| Tc00.1047053508307.150 | <i>T. cruzi</i> | 104 | 1    | 104  |
| Tc00.1047053508307.190 | <i>T. cruzi</i> | 175 | 70   | 244  |
| Tc00.1047053508307.50  | <i>T. cruzi</i> | 47  | 259  | 305  |
| Tc00.1047053508307.60  | <i>T. cruzi</i> | 237 | 36   | 272  |
| Tc00.1047053508307.60  | <i>T. cruzi</i> | 58  | 288  | 345  |
| Tc00.1047053508307.60  | <i>T. cruzi</i> | 71  | 366  | 436  |
| Tc00.1047053508307.60  | <i>T. cruzi</i> | 152 | 446  | 597  |
| Tc00.1047053508307.70  | <i>T. cruzi</i> | 49  | 276  | 324  |
| Tc00.1047053508307.90  | <i>T. cruzi</i> | 90  | 88   | 177  |
| Tc00.1047053508317.20  | <i>T. cruzi</i> | 130 | 1    | 130  |
| Tc00.1047053508317.20  | <i>T. cruzi</i> | 158 | 143  | 300  |
| Tc00.1047053508317.20  | <i>T. cruzi</i> | 202 | 381  | 582  |
| Tc00.1047053508317.20  | <i>T. cruzi</i> | 95  | 585  | 679  |
| Tc00.1047053508317.30  | <i>T. cruzi</i> | 42  | 211  | 252  |
| Tc00.1047053508317.30  | <i>T. cruzi</i> | 200 | 255  | 454  |
| Tc00.1047053508317.30  | <i>T. cruzi</i> | 143 | 557  | 699  |
| Tc00.1047053508317.60  | <i>T. cruzi</i> | 87  | 163  | 249  |
| Tc00.1047053508321.21  | <i>T. cruzi</i> | 46  | 90   | 135  |

|                        |                 |     |      |      |
|------------------------|-----------------|-----|------|------|
| Tc00.1047053508321.30  | <i>T. cruzi</i> | 74  | 1    | 74   |
| Tc00.1047053508321.40  | <i>T. cruzi</i> | 47  | 179  | 225  |
| Tc00.1047053508321.40  | <i>T. cruzi</i> | 513 | 537  | 1049 |
| Tc00.1047053508321.50  | <i>T. cruzi</i> | 93  | 214  | 306  |
| Tc00.1047053508321.60  | <i>T. cruzi</i> | 76  | 76   | 151  |
| Tc00.1047053508321.60  | <i>T. cruzi</i> | 60  | 393  | 452  |
| Tc00.1047053508321.60  | <i>T. cruzi</i> | 60  | 393  | 452  |
| Tc00.1047053508323.100 | <i>T. cruzi</i> | 87  | 129  | 215  |
| Tc00.1047053508323.110 | <i>T. cruzi</i> | 43  | 177  | 219  |
| Tc00.1047053508323.110 | <i>T. cruzi</i> | 53  | 353  | 405  |
| Tc00.1047053508323.110 | <i>T. cruzi</i> | 53  | 353  | 405  |
| Tc00.1047053508323.120 | <i>T. cruzi</i> | 45  | 25   | 69   |
| Tc00.1047053508323.120 | <i>T. cruzi</i> | 54  | 165  | 218  |
| Tc00.1047053508323.120 | <i>T. cruzi</i> | 54  | 165  | 218  |
| Tc00.1047053508323.190 | <i>T. cruzi</i> | 47  | 330  | 376  |
| Tc00.1047053508323.199 | <i>T. cruzi</i> | 49  | 66   | 114  |
| Tc00.1047053508323.20  | <i>T. cruzi</i> | 58  | 1    | 58   |
| Tc00.1047053508323.20  | <i>T. cruzi</i> | 110 | 97   | 206  |
| Tc00.1047053508323.20  | <i>T. cruzi</i> | 301 | 241  | 541  |
| Tc00.1047053508323.30  | <i>T. cruzi</i> | 143 | 126  | 268  |
| Tc00.1047053508323.50  | <i>T. cruzi</i> | 89  | 1    | 89   |
| Tc00.1047053508323.60  | <i>T. cruzi</i> | 49  | 101  | 149  |
| Tc00.1047053508323.70  | <i>T. cruzi</i> | 49  | 101  | 149  |
| Tc00.1047053508323.90  | <i>T. cruzi</i> | 66  | 58   | 123  |
| Tc00.1047053508323.90  | <i>T. cruzi</i> | 41  | 349  | 389  |
| Tc00.1047053508323.90  | <i>T. cruzi</i> | 41  | 349  | 389  |
| Tc00.1047053508325.160 | <i>T. cruzi</i> | 60  | 209  | 268  |
| Tc00.1047053508325.230 | <i>T. cruzi</i> | 42  | 1    | 42   |
| Tc00.1047053508325.230 | <i>T. cruzi</i> | 841 | 679  | 1519 |
| Tc00.1047053508325.30  | <i>T. cruzi</i> | 55  | 1594 | 1648 |
| Tc00.1047053508325.30  | <i>T. cruzi</i> | 71  | 2837 | 2907 |
| Tc00.1047053508325.30  | <i>T. cruzi</i> | 84  | 3382 | 3465 |
| Tc00.1047053508325.310 | <i>T. cruzi</i> | 74  | 27   | 100  |
| Tc00.1047053508325.60  | <i>T. cruzi</i> | 49  | 1    | 49   |
| Tc00.1047053508325.60  | <i>T. cruzi</i> | 61  | 152  | 212  |
| Tc00.1047053508325.90  | <i>T. cruzi</i> | 61  | 100  | 160  |
| Tc00.1047053508347.100 | <i>T. cruzi</i> | 67  | 61   | 127  |
| Tc00.1047053508347.100 | <i>T. cruzi</i> | 69  | 140  | 208  |
| Tc00.1047053508347.100 | <i>T. cruzi</i> | 83  | 486  | 568  |
| Tc00.1047053508347.110 | <i>T. cruzi</i> | 40  | 175  | 214  |
| Tc00.1047053508347.120 | <i>T. cruzi</i> | 48  | 942  | 989  |
| Tc00.1047053508347.150 | <i>T. cruzi</i> | 60  | 1    | 60   |
| Tc00.1047053508347.150 | <i>T. cruzi</i> | 48  | 96   | 143  |
| Tc00.1047053508347.150 | <i>T. cruzi</i> | 82  | 195  | 276  |
| Tc00.1047053508347.159 | <i>T. cruzi</i> | 57  | 69   | 125  |
| Tc00.1047053508347.159 | <i>T. cruzi</i> | 78  | 245  | 322  |
| Tc00.1047053508347.159 | <i>T. cruzi</i> | 51  | 383  | 433  |

|                       |                 |     |      |      |
|-----------------------|-----------------|-----|------|------|
| Tc00.1047053508347.20 | <i>T. cruzi</i> | 62  | 83   | 144  |
| Tc00.1047053508347.24 | <i>T. cruzi</i> | 57  | 1    | 57   |
| Tc00.1047053508347.24 | <i>T. cruzi</i> | 122 | 101  | 222  |
| Tc00.1047053508347.24 | <i>T. cruzi</i> | 63  | 230  | 292  |
| Tc00.1047053508347.30 | <i>T. cruzi</i> | 314 | 137  | 450  |
| Tc00.1047053508347.40 | <i>T. cruzi</i> | 95  | 40   | 134  |
| Tc00.1047053508347.40 | <i>T. cruzi</i> | 47  | 157  | 203  |
| Tc00.1047053508347.40 | <i>T. cruzi</i> | 228 | 222  | 449  |
| Tc00.1047053508347.40 | <i>T. cruzi</i> | 273 | 465  | 737  |
| Tc00.1047053508347.40 | <i>T. cruzi</i> | 80  | 896  | 975  |
| Tc00.1047053508347.40 | <i>T. cruzi</i> | 102 | 1090 | 1191 |
| Tc00.1047053508347.40 | <i>T. cruzi</i> | 49  | 1281 | 1329 |
| Tc00.1047053508347.50 | <i>T. cruzi</i> | 260 | 116  | 375  |
| Tc00.1047053508347.50 | <i>T. cruzi</i> | 132 | 485  | 616  |
| Tc00.1047053508347.60 | <i>T. cruzi</i> | 44  | 77   | 120  |
| Tc00.1047053508347.80 | <i>T. cruzi</i> | 59  | 19   | 77   |
| Tc00.1047053508347.80 | <i>T. cruzi</i> | 157 | 116  | 272  |
| Tc00.1047053508347.80 | <i>T. cruzi</i> | 40  | 506  | 545  |
| Tc00.1047053508347.90 | <i>T. cruzi</i> | 122 | 1    | 122  |
| Tc00.1047053508347.90 | <i>T. cruzi</i> | 86  | 172  | 257  |
| Tc00.1047053508347.90 | <i>T. cruzi</i> | 49  | 324  | 372  |
| Tc00.1047053508347.90 | <i>T. cruzi</i> | 45  | 419  | 463  |
| Tc00.1047053508347.90 | <i>T. cruzi</i> | 190 | 726  | 915  |
| Tc00.1047053508347.90 | <i>T. cruzi</i> | 99  | 927  | 1025 |
| Tc00.1047053508347.90 | <i>T. cruzi</i> | 53  | 1027 | 1079 |
| Tc00.1047053508347.90 | <i>T. cruzi</i> | 101 | 1139 | 1239 |
| Tc00.1047053508347.90 | <i>T. cruzi</i> | 166 | 1390 | 1555 |
| Tc00.1047053508347.90 | <i>T. cruzi</i> | 57  | 1607 | 1663 |
| Tc00.1047053508347.90 | <i>T. cruzi</i> | 146 | 1755 | 1900 |
| Tc00.1047053508347.90 | <i>T. cruzi</i> | 92  | 2008 | 2099 |
| Tc00.1047053508357.20 | <i>T. cruzi</i> | 42  | 205  | 246  |
| Tc00.1047053508357.30 | <i>T. cruzi</i> | 157 | 1    | 157  |
| Tc00.1047053508357.30 | <i>T. cruzi</i> | 57  | 272  | 328  |
| Tc00.1047053508357.30 | <i>T. cruzi</i> | 70  | 384  | 453  |
| Tc00.1047053508357.40 | <i>T. cruzi</i> | 60  | 95   | 154  |
| Tc00.1047053508357.9  | <i>T. cruzi</i> | 181 | 1    | 181  |
| Tc00.1047053508375.10 | <i>T. cruzi</i> | 428 | 29   | 456  |
| Tc00.1047053508375.20 | <i>T. cruzi</i> | 43  | 1    | 43   |
| Tc00.1047053508375.20 | <i>T. cruzi</i> | 53  | 121  | 173  |
| Tc00.1047053508375.20 | <i>T. cruzi</i> | 44  | 414  | 457  |
| Tc00.1047053508375.20 | <i>T. cruzi</i> | 185 | 720  | 904  |
| Tc00.1047053508375.70 | <i>T. cruzi</i> | 52  | 34   | 85   |
| Tc00.1047053508375.70 | <i>T. cruzi</i> | 110 | 122  | 231  |
| Tc00.1047053508375.70 | <i>T. cruzi</i> | 65  | 244  | 308  |
| Tc00.1047053508375.70 | <i>T. cruzi</i> | 211 | 361  | 571  |
| Tc00.1047053508375.70 | <i>T. cruzi</i> | 52  | 733  | 784  |
| Tc00.1047053508379.20 | <i>T. cruzi</i> | 78  | 1    | 78   |

|                        |                 |      |      |      |
|------------------------|-----------------|------|------|------|
| Tc00.1047053508379.20  | <i>T. cruzi</i> | 69   | 100  | 168  |
| Tc00.1047053508385.10  | <i>T. cruzi</i> | 139  | 110  | 248  |
| Tc00.1047053508385.10  | <i>T. cruzi</i> | 265  | 278  | 542  |
| Tc00.1047053508385.10  | <i>T. cruzi</i> | 58   | 766  | 823  |
| Tc00.1047053508385.10  | <i>T. cruzi</i> | 108  | 1012 | 1119 |
| Tc00.1047053508385.10  | <i>T. cruzi</i> | 288  | 1138 | 1425 |
| Tc00.1047053508385.10  | <i>T. cruzi</i> | 101  | 1500 | 1600 |
| Tc00.1047053508385.10  | <i>T. cruzi</i> | 65   | 1645 | 1709 |
| Tc00.1047053508385.10  | <i>T. cruzi</i> | 128  | 1719 | 1846 |
| Tc00.1047053508385.20  | <i>T. cruzi</i> | 1137 | 1    | 1137 |
| Tc00.1047053508385.20  | <i>T. cruzi</i> | 159  | 1146 | 1304 |
| Tc00.1047053508385.30  | <i>T. cruzi</i> | 280  | 1    | 280  |
| Tc00.1047053508385.30  | <i>T. cruzi</i> | 51   | 473  | 523  |
| Tc00.1047053508385.30  | <i>T. cruzi</i> | 220  | 608  | 827  |
| Tc00.1047053508385.40  | <i>T. cruzi</i> | 296  | 1    | 296  |
| Tc00.1047053508385.40  | <i>T. cruzi</i> | 191  | 316  | 506  |
| Tc00.1047053508385.50  | <i>T. cruzi</i> | 49   | 39   | 87   |
| Tc00.1047053508385.50  | <i>T. cruzi</i> | 78   | 97   | 174  |
| Tc00.1047053508385.50  | <i>T. cruzi</i> | 61   | 221  | 281  |
| Tc00.1047053508385.50  | <i>T. cruzi</i> | 164  | 303  | 466  |
| Tc00.1047053508385.50  | <i>T. cruzi</i> | 44   | 477  | 520  |
| Tc00.1047053508385.60  | <i>T. cruzi</i> | 109  | 157  | 265  |
| Tc00.1047053508387.100 | <i>T. cruzi</i> | 205  | 184  | 388  |
| Tc00.1047053508387.110 | <i>T. cruzi</i> | 53   | 171  | 223  |
| Tc00.1047053508387.110 | <i>T. cruzi</i> | 289  | 236  | 524  |
| Tc00.1047053508387.110 | <i>T. cruzi</i> | 124  | 527  | 650  |
| Tc00.1047053508387.120 | <i>T. cruzi</i> | 48   | 71   | 118  |
| Tc00.1047053508387.120 | <i>T. cruzi</i> | 43   | 219  | 261  |
| Tc00.1047053508387.120 | <i>T. cruzi</i> | 43   | 219  | 261  |
| Tc00.1047053508387.130 | <i>T. cruzi</i> | 48   | 394  | 441  |
| Tc00.1047053508387.140 | <i>T. cruzi</i> | 100  | 168  | 267  |
| Tc00.1047053508387.140 | <i>T. cruzi</i> | 131  | 285  | 415  |
| Tc00.1047053508387.150 | <i>T. cruzi</i> | 55   | 50   | 104  |
| Tc00.1047053508387.150 | <i>T. cruzi</i> | 78   | 133  | 210  |
| Tc00.1047053508387.150 | <i>T. cruzi</i> | 41   | 256  | 296  |
| Tc00.1047053508387.150 | <i>T. cruzi</i> | 224  | 328  | 551  |
| Tc00.1047053508387.150 | <i>T. cruzi</i> | 282  | 586  | 867  |
| Tc00.1047053508387.150 | <i>T. cruzi</i> | 66   | 873  | 938  |
| Tc00.1047053508387.160 | <i>T. cruzi</i> | 70   | 15   | 84   |
| Tc00.1047053508387.160 | <i>T. cruzi</i> | 88   | 118  | 205  |
| Tc00.1047053508387.160 | <i>T. cruzi</i> | 49   | 631  | 679  |
| Tc00.1047053508387.160 | <i>T. cruzi</i> | 69   | 704  | 772  |
| Tc00.1047053508387.170 | <i>T. cruzi</i> | 41   | 158  | 198  |
| Tc00.1047053508387.170 | <i>T. cruzi</i> | 67   | 206  | 272  |
| Tc00.1047053508387.170 | <i>T. cruzi</i> | 117  | 415  | 531  |
| Tc00.1047053508387.30  | <i>T. cruzi</i> | 88   | 1    | 88   |
| Tc00.1047053508387.30  | <i>T. cruzi</i> | 292  | 145  | 436  |

|                        |                 |     |      |      |
|------------------------|-----------------|-----|------|------|
| Tc00.1047053508387.30  | <i>T. cruzi</i> | 153 | 441  | 593  |
| Tc00.1047053508387.40  | <i>T. cruzi</i> | 99  | 58   | 156  |
| Tc00.1047053508387.50  | <i>T. cruzi</i> | 116 | 304  | 419  |
| Tc00.1047053508387.50  | <i>T. cruzi</i> | 51  | 490  | 540  |
| Tc00.1047053508387.50  | <i>T. cruzi</i> | 358 | 559  | 916  |
| Tc00.1047053508387.50  | <i>T. cruzi</i> | 117 | 918  | 1034 |
| Tc00.1047053508387.60  | <i>T. cruzi</i> | 52  | 189  | 240  |
| Tc00.1047053508387.70  | <i>T. cruzi</i> | 45  | 148  | 192  |
| Tc00.1047053508387.70  | <i>T. cruzi</i> | 49  | 240  | 288  |
| Tc00.1047053508387.70  | <i>T. cruzi</i> | 58  | 324  | 381  |
| Tc00.1047053508387.70  | <i>T. cruzi</i> | 99  | 605  | 703  |
| Tc00.1047053508387.70  | <i>T. cruzi</i> | 46  | 727  | 772  |
| Tc00.1047053508387.70  | <i>T. cruzi</i> | 61  | 1147 | 1207 |
| Tc00.1047053508387.70  | <i>T. cruzi</i> | 62  | 1249 | 1310 |
| Tc00.1047053508387.80  | <i>T. cruzi</i> | 57  | 48   | 104  |
| Tc00.1047053508387.80  | <i>T. cruzi</i> | 56  | 332  | 387  |
| Tc00.1047053508387.90  | <i>T. cruzi</i> | 107 | 1    | 107  |
| Tc00.1047053508387.90  | <i>T. cruzi</i> | 147 | 255  | 401  |
| Tc00.1047053508387.90  | <i>T. cruzi</i> | 48  | 481  | 528  |
| Tc00.1047053508389.10  | <i>T. cruzi</i> | 41  | 224  | 264  |
| Tc00.1047053508389.100 | <i>T. cruzi</i> | 398 | 76   | 473  |
| Tc00.1047053508389.114 | <i>T. cruzi</i> | 141 | 25   | 165  |
| Tc00.1047053508389.130 | <i>T. cruzi</i> | 311 | 78   | 388  |
| Tc00.1047053508389.138 | <i>T. cruzi</i> | 142 | 22   | 163  |
| Tc00.1047053508389.154 | <i>T. cruzi</i> | 226 | 73   | 298  |
| Tc00.1047053508389.20  | <i>T. cruzi</i> | 238 | 107  | 344  |
| Tc00.1047053508389.20  | <i>T. cruzi</i> | 213 | 482  | 694  |
| Tc00.1047053508389.50  | <i>T. cruzi</i> | 227 | 75   | 301  |
| Tc00.1047053508389.90  | <i>T. cruzi</i> | 46  | 272  | 317  |
| Tc00.1047053508389.90  | <i>T. cruzi</i> | 69  | 411  | 479  |
| Tc00.1047053508389.90  | <i>T. cruzi</i> | 114 | 544  | 657  |
| Tc00.1047053508439.30  | <i>T. cruzi</i> | 41  | 561  | 601  |
| Tc00.1047053508439.40  | <i>T. cruzi</i> | 94  | 1    | 94   |
| Tc00.1047053508463.20  | <i>T. cruzi</i> | 64  | 796  | 859  |
| Tc00.1047053508463.20  | <i>T. cruzi</i> | 59  | 1063 | 1121 |
| Tc00.1047053508463.20  | <i>T. cruzi</i> | 59  | 1063 | 1121 |
| Tc00.1047053508465.110 | <i>T. cruzi</i> | 41  | 30   | 70   |
| Tc00.1047053508465.130 | <i>T. cruzi</i> | 40  | 138  | 177  |
| Tc00.1047053508465.149 | <i>T. cruzi</i> | 74  | 1    | 74   |
| Tc00.1047053508465.20  | <i>T. cruzi</i> | 60  | 66   | 125  |
| Tc00.1047053508465.20  | <i>T. cruzi</i> | 66  | 272  | 337  |
| Tc00.1047053508465.20  | <i>T. cruzi</i> | 41  | 390  | 430  |
| Tc00.1047053508465.30  | <i>T. cruzi</i> | 58  | 230  | 287  |
| Tc00.1047053508465.40  | <i>T. cruzi</i> | 80  | 257  | 336  |
| Tc00.1047053508465.60  | <i>T. cruzi</i> | 56  | 1    | 56   |
| Tc00.1047053508465.60  | <i>T. cruzi</i> | 73  | 325  | 397  |
| Tc00.1047053508465.60  | <i>T. cruzi</i> | 48  | 632  | 679  |

|                        |                 |     |     |      |
|------------------------|-----------------|-----|-----|------|
| Tc00.1047053508465.60  | <i>T. cruzi</i> | 78  | 905 | 982  |
| Tc00.1047053508465.70  | <i>T. cruzi</i> | 67  | 11  | 77   |
| Tc00.1047053508465.70  | <i>T. cruzi</i> | 121 | 301 | 421  |
| Tc00.1047053508465.70  | <i>T. cruzi</i> | 60  | 572 | 631  |
| Tc00.1047053508465.80  | <i>T. cruzi</i> | 180 | 131 | 310  |
| Tc00.1047053508465.80  | <i>T. cruzi</i> | 58  | 319 | 376  |
| Tc00.1047053508465.80  | <i>T. cruzi</i> | 58  | 319 | 376  |
| Tc00.1047053508469.20  | <i>T. cruzi</i> | 66  | 30  | 95   |
| Tc00.1047053508469.20  | <i>T. cruzi</i> | 68  | 272 | 339  |
| Tc00.1047053508469.20  | <i>T. cruzi</i> | 68  | 272 | 339  |
| Tc00.1047053508471.19  | <i>T. cruzi</i> | 382 | 125 | 506  |
| Tc00.1047053508473.10  | <i>T. cruzi</i> | 75  | 1   | 75   |
| Tc00.1047053508473.10  | <i>T. cruzi</i> | 40  | 298 | 337  |
| Tc00.1047053508473.10  | <i>T. cruzi</i> | 40  | 591 | 630  |
| Tc00.1047053508489.10  | <i>T. cruzi</i> | 74  | 520 | 593  |
| Tc00.1047053508489.30  | <i>T. cruzi</i> | 364 | 27  | 390  |
| Tc00.1047053508489.40  | <i>T. cruzi</i> | 233 | 29  | 261  |
| Tc00.1047053508489.40  | <i>T. cruzi</i> | 143 | 358 | 500  |
| Tc00.1047053508515.10  | <i>T. cruzi</i> | 226 | 1   | 226  |
| Tc00.1047053508515.100 | <i>T. cruzi</i> | 249 | 76  | 324  |
| Tc00.1047053508515.120 | <i>T. cruzi</i> | 51  | 248 | 298  |
| Tc00.1047053508515.120 | <i>T. cruzi</i> | 62  | 533 | 594  |
| Tc00.1047053508515.120 | <i>T. cruzi</i> | 62  | 533 | 594  |
| Tc00.1047053508515.150 | <i>T. cruzi</i> | 47  | 1   | 47   |
| Tc00.1047053508515.150 | <i>T. cruzi</i> | 299 | 711 | 1009 |
| Tc00.1047053508515.30  | <i>T. cruzi</i> | 77  | 1   | 77   |
| Tc00.1047053508515.30  | <i>T. cruzi</i> | 147 | 130 | 276  |
| Tc00.1047053508515.30  | <i>T. cruzi</i> | 54  | 368 | 421  |
| Tc00.1047053508515.50  | <i>T. cruzi</i> | 54  | 479 | 532  |
| Tc00.1047053508515.60  | <i>T. cruzi</i> | 49  | 391 | 439  |
| Tc00.1047053508515.80  | <i>T. cruzi</i> | 49  | 40  | 88   |
| Tc00.1047053508515.80  | <i>T. cruzi</i> | 44  | 189 | 232  |
| Tc00.1047053508515.80  | <i>T. cruzi</i> | 44  | 189 | 232  |
| Tc00.1047053508535.10  | <i>T. cruzi</i> | 69  | 33  | 101  |
| Tc00.1047053508535.20  | <i>T. cruzi</i> | 93  | 47  | 139  |
| Tc00.1047053508535.40  | <i>T. cruzi</i> | 144 | 58  | 201  |
| Tc00.1047053508535.40  | <i>T. cruzi</i> | 58  | 216 | 273  |
| Tc00.1047053508539.110 | <i>T. cruzi</i> | 223 | 22  | 244  |
| Tc00.1047053508539.155 | <i>T. cruzi</i> | 182 | 24  | 205  |
| Tc00.1047053508539.160 | <i>T. cruzi</i> | 226 | 26  | 251  |
| Tc00.1047053508539.20  | <i>T. cruzi</i> | 40  | 1   | 40   |
| Tc00.1047053508539.30  | <i>T. cruzi</i> | 237 | 1   | 237  |
| Tc00.1047053508539.40  | <i>T. cruzi</i> | 63  | 1   | 63   |
| Tc00.1047053508539.40  | <i>T. cruzi</i> | 85  | 166 | 250  |
| Tc00.1047053508539.40  | <i>T. cruzi</i> | 271 | 296 | 566  |
| Tc00.1047053508539.40  | <i>T. cruzi</i> | 47  | 706 | 752  |
| Tc00.1047053508539.50  | <i>T. cruzi</i> | 49  | 1   | 49   |

|                        |                 |     |      |      |
|------------------------|-----------------|-----|------|------|
| Tc00.1047053508539.50  | <i>T. cruzi</i> | 52  | 112  | 163  |
| Tc00.1047053508539.50  | <i>T. cruzi</i> | 79  | 197  | 275  |
| Tc00.1047053508539.50  | <i>T. cruzi</i> | 43  | 697  | 739  |
| Tc00.1047053508539.50  | <i>T. cruzi</i> | 77  | 768  | 844  |
| Tc00.1047053508539.50  | <i>T. cruzi</i> | 94  | 973  | 1066 |
| Tc00.1047053508539.60  | <i>T. cruzi</i> | 228 | 23   | 250  |
| Tc00.1047053508539.71  | <i>T. cruzi</i> | 62  | 74   | 135  |
| Tc00.1047053508539.80  | <i>T. cruzi</i> | 318 | 70   | 387  |
| Tc00.1047053508541.10  | <i>T. cruzi</i> | 74  | 67   | 140  |
| Tc00.1047053508541.110 | <i>T. cruzi</i> | 195 | 25   | 219  |
| Tc00.1047053508541.130 | <i>T. cruzi</i> | 322 | 70   | 391  |
| Tc00.1047053508541.160 | <i>T. cruzi</i> | 117 | 37   | 153  |
| Tc00.1047053508541.170 | <i>T. cruzi</i> | 135 | 59   | 193  |
| Tc00.1047053508541.190 | <i>T. cruzi</i> | 197 | 1    | 197  |
| Tc00.1047053508541.190 | <i>T. cruzi</i> | 54  | 311  | 364  |
| Tc00.1047053508541.190 | <i>T. cruzi</i> | 48  | 626  | 673  |
| Tc00.1047053508541.20  | <i>T. cruzi</i> | 209 | 25   | 233  |
| Tc00.1047053508541.200 | <i>T. cruzi</i> | 76  | 100  | 175  |
| Tc00.1047053508541.200 | <i>T. cruzi</i> | 50  | 198  | 247  |
| Tc00.1047053508541.200 | <i>T. cruzi</i> | 54  | 370  | 423  |
| Tc00.1047053508541.210 | <i>T. cruzi</i> | 56  | 158  | 213  |
| Tc00.1047053508541.210 | <i>T. cruzi</i> | 175 | 253  | 427  |
| Tc00.1047053508541.210 | <i>T. cruzi</i> | 41  | 457  | 497  |
| Tc00.1047053508541.210 | <i>T. cruzi</i> | 115 | 510  | 624  |
| Tc00.1047053508541.225 | <i>T. cruzi</i> | 59  | 225  | 283  |
| Tc00.1047053508541.80  | <i>T. cruzi</i> | 184 | 28   | 211  |
| Tc00.1047053508541.90  | <i>T. cruzi</i> | 252 | 27   | 278  |
| Tc00.1047053508555.20  | <i>T. cruzi</i> | 83  | 1    | 83   |
| Tc00.1047053508555.20  | <i>T. cruzi</i> | 46  | 126  | 171  |
| Tc00.1047053508555.20  | <i>T. cruzi</i> | 163 | 227  | 389  |
| Tc00.1047053508555.50  | <i>T. cruzi</i> | 40  | 11   | 50   |
| Tc00.1047053508555.60  | <i>T. cruzi</i> | 68  | 1    | 68   |
| Tc00.1047053508555.60  | <i>T. cruzi</i> | 42  | 572  | 613  |
| Tc00.1047053508555.60  | <i>T. cruzi</i> | 111 | 696  | 806  |
| Tc00.1047053508555.70  | <i>T. cruzi</i> | 317 | 1    | 317  |
| Tc00.1047053508555.70  | <i>T. cruzi</i> | 86  | 348  | 433  |
| Tc00.1047053508555.70  | <i>T. cruzi</i> | 70  | 456  | 525  |
| Tc00.1047053508557.20  | <i>T. cruzi</i> | 40  | 26   | 65   |
| Tc00.1047053508559.29  | <i>T. cruzi</i> | 46  | 222  | 267  |
| Tc00.1047053508559.29  | <i>T. cruzi</i> | 55  | 1600 | 1654 |
| Tc00.1047053508559.29  | <i>T. cruzi</i> | 70  | 2837 | 2906 |
| Tc00.1047053508559.29  | <i>T. cruzi</i> | 51  | 3381 | 3431 |
| Tc00.1047053508559.90  | <i>T. cruzi</i> | 48  | 255  | 302  |
| Tc00.1047053508563.20  | <i>T. cruzi</i> | 43  | 1    | 43   |
| Tc00.1047053508563.20  | <i>T. cruzi</i> | 65  | 65   | 129  |
| Tc00.1047053508563.20  | <i>T. cruzi</i> | 164 | 659  | 822  |
| Tc00.1047053508567.100 | <i>T. cruzi</i> | 75  | 1    | 75   |

|                        |                 |     |      |      |
|------------------------|-----------------|-----|------|------|
| Tc00.1047053508567.100 | <i>T. cruzi</i> | 71  | 85   | 155  |
| Tc00.1047053508567.100 | <i>T. cruzi</i> | 82  | 310  | 391  |
| Tc00.1047053508567.100 | <i>T. cruzi</i> | 109 | 854  | 962  |
| Tc00.1047053508567.100 | <i>T. cruzi</i> | 74  | 965  | 1038 |
| Tc00.1047053508567.100 | <i>T. cruzi</i> | 65  | 1221 | 1285 |
| Tc00.1047053508567.100 | <i>T. cruzi</i> | 55  | 1351 | 1405 |
| Tc00.1047053508567.20  | <i>T. cruzi</i> | 103 | 1    | 103  |
| Tc00.1047053508567.60  | <i>T. cruzi</i> | 229 | 1    | 229  |
| Tc00.1047053508567.60  | <i>T. cruzi</i> | 44  | 313  | 356  |
| Tc00.1047053508567.60  | <i>T. cruzi</i> | 95  | 360  | 454  |
| Tc00.1047053508567.60  | <i>T. cruzi</i> | 83  | 462  | 544  |
| Tc00.1047053508567.80  | <i>T. cruzi</i> | 113 | 13   | 125  |
| Tc00.1047053508567.80  | <i>T. cruzi</i> | 58  | 133  | 190  |
| Tc00.1047053508567.80  | <i>T. cruzi</i> | 63  | 671  | 733  |
| Tc00.1047053508569.10  | <i>T. cruzi</i> | 596 | 1    | 596  |
| Tc00.1047053508569.100 | <i>T. cruzi</i> | 53  | 126  | 178  |
| Tc00.1047053508569.100 | <i>T. cruzi</i> | 88  | 194  | 281  |
| Tc00.1047053508569.120 | <i>T. cruzi</i> | 57  | 1    | 57   |
| Tc00.1047053508569.120 | <i>T. cruzi</i> | 101 | 154  | 254  |
| Tc00.1047053508569.120 | <i>T. cruzi</i> | 195 | 311  | 505  |
| Tc00.1047053508569.130 | <i>T. cruzi</i> | 161 | 1    | 161  |
| Tc00.1047053508569.130 | <i>T. cruzi</i> | 72  | 249  | 320  |
| Tc00.1047053508569.130 | <i>T. cruzi</i> | 44  | 434  | 477  |
| Tc00.1047053508569.140 | <i>T. cruzi</i> | 196 | 93   | 288  |
| Tc00.1047053508569.70  | <i>T. cruzi</i> | 43  | 1843 | 1885 |
| Tc00.1047053508569.70  | <i>T. cruzi</i> | 95  | 1930 | 2024 |
| Tc00.1047053508569.70  | <i>T. cruzi</i> | 68  | 2117 | 2184 |
| Tc00.1047053508569.90  | <i>T. cruzi</i> | 118 | 84   | 201  |
| Tc00.1047053508569.90  | <i>T. cruzi</i> | 73  | 235  | 307  |
| Tc00.1047053508571.10  | <i>T. cruzi</i> | 74  | 137  | 210  |
| Tc00.1047053508571.10  | <i>T. cruzi</i> | 74  | 216  | 289  |
| Tc00.1047053508583.10  | <i>T. cruzi</i> | 92  | 122  | 213  |
| Tc00.1047053508583.10  | <i>T. cruzi</i> | 91  | 320  | 410  |
| Tc00.1047053508583.10  | <i>T. cruzi</i> | 91  | 320  | 410  |
| Tc00.1047053508585.10  | <i>T. cruzi</i> | 47  | 176  | 222  |
| Tc00.1047053508585.20  | <i>T. cruzi</i> | 270 | 34   | 303  |
| Tc00.1047053508607.10  | <i>T. cruzi</i> | 57  | 125  | 181  |
| Tc00.1047053508607.30  | <i>T. cruzi</i> | 74  | 2827 | 2900 |
| Tc00.1047053508607.30  | <i>T. cruzi</i> | 51  | 3377 | 3427 |
| Tc00.1047053508607.30  | <i>T. cruzi</i> | 51  | 3377 | 3427 |
| Tc00.1047053508607.50  | <i>T. cruzi</i> | 41  | 290  | 330  |
| Tc00.1047053508607.50  | <i>T. cruzi</i> | 85  | 751  | 835  |
| Tc00.1047053508607.60  | <i>T. cruzi</i> | 41  | 96   | 136  |
| Tc00.1047053508609.10  | <i>T. cruzi</i> | 44  | 254  | 297  |
| Tc00.1047053508609.20  | <i>T. cruzi</i> | 60  | 1    | 60   |
| Tc00.1047053508609.20  | <i>T. cruzi</i> | 55  | 154  | 208  |
| Tc00.1047053508611.30  | <i>T. cruzi</i> | 44  | 254  | 297  |



|                        |                 |     |     |      |
|------------------------|-----------------|-----|-----|------|
| Tc00.1047053508647.10  | <i>T. cruzi</i> | 50  | 109 | 158  |
| Tc00.1047053508647.10  | <i>T. cruzi</i> | 130 | 227 | 356  |
| Tc00.1047053508647.100 | <i>T. cruzi</i> | 54  | 1   | 54   |
| Tc00.1047053508647.120 | <i>T. cruzi</i> | 47  | 250 | 296  |
| Tc00.1047053508647.130 | <i>T. cruzi</i> | 51  | 1   | 51   |
| Tc00.1047053508647.160 | <i>T. cruzi</i> | 306 | 1   | 306  |
| Tc00.1047053508647.170 | <i>T. cruzi</i> | 150 | 1   | 150  |
| Tc00.1047053508647.170 | <i>T. cruzi</i> | 57  | 309 | 365  |
| Tc00.1047053508647.174 | <i>T. cruzi</i> | 41  | 80  | 120  |
| Tc00.1047053508647.20  | <i>T. cruzi</i> | 271 | 1   | 271  |
| Tc00.1047053508647.20  | <i>T. cruzi</i> | 81  | 300 | 380  |
| Tc00.1047053508647.20  | <i>T. cruzi</i> | 94  | 423 | 516  |
| Tc00.1047053508647.210 | <i>T. cruzi</i> | 49  | 1   | 49   |
| Tc00.1047053508647.210 | <i>T. cruzi</i> | 93  | 145 | 237  |
| Tc00.1047053508647.210 | <i>T. cruzi</i> | 93  | 145 | 237  |
| Tc00.1047053508647.220 | <i>T. cruzi</i> | 44  | 318 | 361  |
| Tc00.1047053508647.220 | <i>T. cruzi</i> | 76  | 692 | 767  |
| Tc00.1047053508647.220 | <i>T. cruzi</i> | 76  | 692 | 767  |
| Tc00.1047053508647.250 | <i>T. cruzi</i> | 61  | 1   | 61   |
| Tc00.1047053508647.250 | <i>T. cruzi</i> | 73  | 253 | 325  |
| Tc00.1047053508647.260 | <i>T. cruzi</i> | 86  | 1   | 86   |
| Tc00.1047053508647.260 | <i>T. cruzi</i> | 63  | 100 | 162  |
| Tc00.1047053508647.260 | <i>T. cruzi</i> | 42  | 209 | 250  |
| Tc00.1047053508647.264 | <i>T. cruzi</i> | 184 | 1   | 184  |
| Tc00.1047053508647.290 | <i>T. cruzi</i> | 81  | 73  | 153  |
| Tc00.1047053508647.290 | <i>T. cruzi</i> | 41  | 244 | 284  |
| Tc00.1047053508647.290 | <i>T. cruzi</i> | 41  | 890 | 930  |
| Tc00.1047053508647.290 | <i>T. cruzi</i> | 82  | 964 | 1045 |
| Tc00.1047053508647.30  | <i>T. cruzi</i> | 152 | 143 | 294  |
| Tc00.1047053508647.30  | <i>T. cruzi</i> | 55  | 378 | 432  |
| Tc00.1047053508647.40  | <i>T. cruzi</i> | 105 | 478 | 582  |
| Tc00.1047053508647.90  | <i>T. cruzi</i> | 60  | 1   | 60   |
| Tc00.1047053508647.90  | <i>T. cruzi</i> | 269 | 207 | 475  |
| Tc00.1047053508675.20  | <i>T. cruzi</i> | 244 | 12  | 255  |
| Tc00.1047053508675.20  | <i>T. cruzi</i> | 106 | 294 | 399  |
| Tc00.1047053508675.20  | <i>T. cruzi</i> | 50  | 757 | 806  |
| Tc00.1047053508675.20  | <i>T. cruzi</i> | 127 | 992 | 1118 |
| Tc00.1047053508675.40  | <i>T. cruzi</i> | 66  | 168 | 233  |
| Tc00.1047053508675.40  | <i>T. cruzi</i> | 47  | 463 | 509  |
| Tc00.1047053508675.40  | <i>T. cruzi</i> | 42  | 668 | 709  |
| Tc00.1047053508675.50  | <i>T. cruzi</i> | 104 | 1   | 104  |
| Tc00.1047053508675.50  | <i>T. cruzi</i> | 142 | 367 | 508  |
| Tc00.1047053508675.50  | <i>T. cruzi</i> | 64  | 576 | 639  |
| Tc00.1047053508675.50  | <i>T. cruzi</i> | 48  | 661 | 708  |
| Tc00.1047053508675.9   | <i>T. cruzi</i> | 95  | 1   | 95   |
| Tc00.1047053508681.20  | <i>T. cruzi</i> | 66  | 48  | 113  |
| Tc00.1047053508681.31  | <i>T. cruzi</i> | 142 | 139 | 280  |

|                       |                 |     |      |      |
|-----------------------|-----------------|-----|------|------|
| Tc00.1047053508685.9  | <i>T. cruzi</i> | 56  | 210  | 265  |
| Tc00.1047053508717.10 | <i>T. cruzi</i> | 51  | 1    | 51   |
| Tc00.1047053508717.10 | <i>T. cruzi</i> | 366 | 303  | 668  |
| Tc00.1047053508717.20 | <i>T. cruzi</i> | 61  | 452  | 512  |
| Tc00.1047053508717.33 | <i>T. cruzi</i> | 109 | 1    | 109  |
| Tc00.1047053508717.33 | <i>T. cruzi</i> | 42  | 168  | 209  |
| Tc00.1047053508717.33 | <i>T. cruzi</i> | 51  | 449  | 499  |
| Tc00.1047053508717.40 | <i>T. cruzi</i> | 46  | 70   | 115  |
| Tc00.1047053508717.40 | <i>T. cruzi</i> | 91  | 177  | 267  |
| Tc00.1047053508717.40 | <i>T. cruzi</i> | 91  | 177  | 267  |
| Tc00.1047053508717.53 | <i>T. cruzi</i> | 56  | 24   | 79   |
| Tc00.1047053508717.53 | <i>T. cruzi</i> | 41  | 100  | 140  |
| Tc00.1047053508717.53 | <i>T. cruzi</i> | 87  | 175  | 261  |
| Tc00.1047053508717.60 | <i>T. cruzi</i> | 78  | 683  | 760  |
| Tc00.1047053508719.20 | <i>T. cruzi</i> | 45  | 1    | 45   |
| Tc00.1047053508719.20 | <i>T. cruzi</i> | 108 | 208  | 315  |
| Tc00.1047053508719.20 | <i>T. cruzi</i> | 108 | 208  | 315  |
| Tc00.1047053508719.30 | <i>T. cruzi</i> | 192 | 1    | 192  |
| Tc00.1047053508719.40 | <i>T. cruzi</i> | 106 | 23   | 128  |
| Tc00.1047053508719.50 | <i>T. cruzi</i> | 81  | 119  | 199  |
| Tc00.1047053508719.60 | <i>T. cruzi</i> | 99  | 29   | 127  |
| Tc00.1047053508719.70 | <i>T. cruzi</i> | 239 | 1    | 239  |
| Tc00.1047053508719.70 | <i>T. cruzi</i> | 121 | 277  | 397  |
| Tc00.1047053508719.9  | <i>T. cruzi</i> | 43  | 87   | 129  |
| Tc00.1047053508719.9  | <i>T. cruzi</i> | 42  | 303  | 344  |
| Tc00.1047053508719.9  | <i>T. cruzi</i> | 78  | 729  | 806  |
| Tc00.1047053508721.10 | <i>T. cruzi</i> | 56  | 1    | 56   |
| Tc00.1047053508723.10 | <i>T. cruzi</i> | 40  | 379  | 418  |
| Tc00.1047053508723.10 | <i>T. cruzi</i> | 55  | 832  | 886  |
| Tc00.1047053508723.10 | <i>T. cruzi</i> | 55  | 832  | 886  |
| Tc00.1047053508723.20 | <i>T. cruzi</i> | 91  | 222  | 312  |
| Tc00.1047053508723.20 | <i>T. cruzi</i> | 82  | 347  | 428  |
| Tc00.1047053508723.24 | <i>T. cruzi</i> | 168 | 392  | 559  |
| Tc00.1047053508723.30 | <i>T. cruzi</i> | 102 | 146  | 247  |
| Tc00.1047053508723.30 | <i>T. cruzi</i> | 81  | 392  | 472  |
| Tc00.1047053508723.30 | <i>T. cruzi</i> | 312 | 479  | 790  |
| Tc00.1047053508723.40 | <i>T. cruzi</i> | 106 | 1    | 106  |
| Tc00.1047053508723.40 | <i>T. cruzi</i> | 104 | 136  | 239  |
| Tc00.1047053508723.40 | <i>T. cruzi</i> | 150 | 287  | 436  |
| Tc00.1047053508723.40 | <i>T. cruzi</i> | 46  | 642  | 687  |
| Tc00.1047053508723.40 | <i>T. cruzi</i> | 131 | 706  | 836  |
| Tc00.1047053508723.50 | <i>T. cruzi</i> | 401 | 61   | 461  |
| Tc00.1047053508723.70 | <i>T. cruzi</i> | 113 | 530  | 642  |
| Tc00.1047053508723.70 | <i>T. cruzi</i> | 90  | 870  | 959  |
| Tc00.1047053508723.70 | <i>T. cruzi</i> | 66  | 997  | 1062 |
| Tc00.1047053508723.70 | <i>T. cruzi</i> | 45  | 1090 | 1134 |
| Tc00.1047053508723.70 | <i>T. cruzi</i> | 70  | 1269 | 1338 |

|                        |                 |     |      |      |
|------------------------|-----------------|-----|------|------|
| Tc00.1047053508723.70  | <i>T. cruzi</i> | 115 | 1400 | 1514 |
| Tc00.1047053508723.70  | <i>T. cruzi</i> | 89  | 1590 | 1678 |
| Tc00.1047053508723.80  | <i>T. cruzi</i> | 105 | 1    | 105  |
| Tc00.1047053508723.90  | <i>T. cruzi</i> | 41  | 219  | 259  |
| Tc00.1047053508727.18  | <i>T. cruzi</i> | 44  | 123  | 166  |
| Tc00.1047053508727.24  | <i>T. cruzi</i> | 43  | 80   | 122  |
| Tc00.1047053508727.30  | <i>T. cruzi</i> | 45  | 238  | 282  |
| Tc00.1047053508727.40  | <i>T. cruzi</i> | 217 | 15   | 231  |
| Tc00.1047053508727.40  | <i>T. cruzi</i> | 71  | 274  | 344  |
| Tc00.1047053508727.44  | <i>T. cruzi</i> | 46  | 122  | 167  |
| Tc00.1047053508727.44  | <i>T. cruzi</i> | 54  | 218  | 271  |
| Tc00.1047053508727.44  | <i>T. cruzi</i> | 124 | 304  | 427  |
| Tc00.1047053508727.50  | <i>T. cruzi</i> | 160 | 22   | 181  |
| Tc00.1047053508727.54  | <i>T. cruzi</i> | 59  | 98   | 156  |
| Tc00.1047053508727.60  | <i>T. cruzi</i> | 41  | 1    | 41   |
| Tc00.1047053508727.60  | <i>T. cruzi</i> | 141 | 53   | 193  |
| Tc00.1047053508727.60  | <i>T. cruzi</i> | 141 | 53   | 193  |
| Tc00.1047053508731.20  | <i>T. cruzi</i> | 105 | 212  | 316  |
| Tc00.1047053508731.30  | <i>T. cruzi</i> | 56  | 16   | 71   |
| Tc00.1047053508731.40  | <i>T. cruzi</i> | 145 | 90   | 234  |
| Tc00.1047053508731.40  | <i>T. cruzi</i> | 87  | 247  | 333  |
| Tc00.1047053508731.40  | <i>T. cruzi</i> | 85  | 453  | 537  |
| Tc00.1047053508731.9   | <i>T. cruzi</i> | 73  | 60   | 132  |
| Tc00.1047053508731.9   | <i>T. cruzi</i> | 68  | 196  | 263  |
| Tc00.1047053508731.9   | <i>T. cruzi</i> | 68  | 196  | 263  |
| Tc00.1047053508765.40  | <i>T. cruzi</i> | 115 | 1    | 115  |
| Tc00.1047053508767.20  | <i>T. cruzi</i> | 219 | 63   | 281  |
| Tc00.1047053508771.30  | <i>T. cruzi</i> | 53  | 1    | 53   |
| Tc00.1047053508771.40  | <i>T. cruzi</i> | 138 | 62   | 199  |
| Tc00.1047053508771.40  | <i>T. cruzi</i> | 52  | 217  | 268  |
| Tc00.1047053508771.40  | <i>T. cruzi</i> | 49  | 294  | 342  |
| Tc00.1047053508771.50  | <i>T. cruzi</i> | 216 | 1    | 216  |
| Tc00.1047053508771.50  | <i>T. cruzi</i> | 54  | 255  | 308  |
| Tc00.1047053508775.30  | <i>T. cruzi</i> | 48  | 248  | 295  |
| Tc00.1047053508775.30  | <i>T. cruzi</i> | 56  | 1620 | 1675 |
| Tc00.1047053508775.30  | <i>T. cruzi</i> | 76  | 2860 | 2935 |
| Tc00.1047053508775.30  | <i>T. cruzi</i> | 84  | 3414 | 3497 |
| Tc00.1047053508777.100 | <i>T. cruzi</i> | 51  | 156  | 206  |
| Tc00.1047053508777.110 | <i>T. cruzi</i> | 66  | 1    | 66   |
| Tc00.1047053508777.110 | <i>T. cruzi</i> | 44  | 102  | 145  |
| Tc00.1047053508777.110 | <i>T. cruzi</i> | 48  | 301  | 348  |
| Tc00.1047053508777.110 | <i>T. cruzi</i> | 71  | 415  | 485  |
| Tc00.1047053508777.110 | <i>T. cruzi</i> | 97  | 665  | 761  |
| Tc00.1047053508777.120 | <i>T. cruzi</i> | 73  | 85   | 157  |
| Tc00.1047053508777.130 | <i>T. cruzi</i> | 47  | 114  | 160  |
| Tc00.1047053508777.130 | <i>T. cruzi</i> | 87  | 481  | 567  |
| Tc00.1047053508777.130 | <i>T. cruzi</i> | 121 | 605  | 725  |

|                        |                 |     |      |      |
|------------------------|-----------------|-----|------|------|
| Tc00.1047053508777.130 | <i>T. cruzi</i> | 70  | 750  | 819  |
| Tc00.1047053508777.140 | <i>T. cruzi</i> | 60  | 141  | 200  |
| Tc00.1047053508777.140 | <i>T. cruzi</i> | 43  | 231  | 273  |
| Tc00.1047053508777.140 | <i>T. cruzi</i> | 43  | 231  | 273  |
| Tc00.1047053508777.150 | <i>T. cruzi</i> | 64  | 139  | 202  |
| Tc00.1047053508777.150 | <i>T. cruzi</i> | 140 | 227  | 366  |
| Tc00.1047053508777.150 | <i>T. cruzi</i> | 81  | 397  | 477  |
| Tc00.1047053508777.150 | <i>T. cruzi</i> | 56  | 574  | 629  |
| Tc00.1047053508777.160 | <i>T. cruzi</i> | 45  | 341  | 385  |
| Tc00.1047053508777.160 | <i>T. cruzi</i> | 47  | 533  | 579  |
| Tc00.1047053508777.160 | <i>T. cruzi</i> | 145 | 694  | 838  |
| Tc00.1047053508777.170 | <i>T. cruzi</i> | 90  | 1    | 90   |
| Tc00.1047053508777.170 | <i>T. cruzi</i> | 46  | 173  | 218  |
| Tc00.1047053508777.180 | <i>T. cruzi</i> | 47  | 1    | 47   |
| Tc00.1047053508777.190 | <i>T. cruzi</i> | 112 | 238  | 349  |
| Tc00.1047053508777.20  | <i>T. cruzi</i> | 41  | 126  | 166  |
| Tc00.1047053508777.20  | <i>T. cruzi</i> | 80  | 186  | 265  |
| Tc00.1047053508777.20  | <i>T. cruzi</i> | 80  | 186  | 265  |
| Tc00.1047053508777.30  | <i>T. cruzi</i> | 49  | 77   | 125  |
| Tc00.1047053508777.30  | <i>T. cruzi</i> | 65  | 163  | 227  |
| Tc00.1047053508777.30  | <i>T. cruzi</i> | 131 | 605  | 735  |
| Tc00.1047053508777.30  | <i>T. cruzi</i> | 58  | 741  | 798  |
| Tc00.1047053508777.40  | <i>T. cruzi</i> | 168 | 1    | 168  |
| Tc00.1047053508777.40  | <i>T. cruzi</i> | 49  | 273  | 321  |
| Tc00.1047053508777.40  | <i>T. cruzi</i> | 75  | 518  | 592  |
| Tc00.1047053508777.40  | <i>T. cruzi</i> | 89  | 755  | 843  |
| Tc00.1047053508777.40  | <i>T. cruzi</i> | 146 | 1030 | 1175 |
| Tc00.1047053508777.50  | <i>T. cruzi</i> | 372 | 1    | 372  |
| Tc00.1047053508777.50  | <i>T. cruzi</i> | 114 | 425  | 538  |
| Tc00.1047053508777.90  | <i>T. cruzi</i> | 40  | 1    | 40   |
| Tc00.1047053508777.90  | <i>T. cruzi</i> | 110 | 570  | 679  |
| Tc00.1047053508777.90  | <i>T. cruzi</i> | 110 | 570  | 679  |
| Tc00.1047053508779.20  | <i>T. cruzi</i> | 234 | 1    | 234  |
| Tc00.1047053508779.50  | <i>T. cruzi</i> | 341 | 20   | 360  |
| Tc00.1047053508779.50  | <i>T. cruzi</i> | 48  | 535  | 582  |
| Tc00.1047053508779.9   | <i>T. cruzi</i> | 46  | 192  | 237  |
| Tc00.1047053508781.110 | <i>T. cruzi</i> | 67  | 365  | 431  |
| Tc00.1047053508781.30  | <i>T. cruzi</i> | 62  | 1    | 62   |
| Tc00.1047053508781.30  | <i>T. cruzi</i> | 64  | 721  | 784  |
| Tc00.1047053508781.30  | <i>T. cruzi</i> | 267 | 789  | 1055 |
| Tc00.1047053508781.30  | <i>T. cruzi</i> | 80  | 1065 | 1144 |
| Tc00.1047053508781.80  | <i>T. cruzi</i> | 91  | 1    | 91   |
| Tc00.1047053508781.80  | <i>T. cruzi</i> | 52  | 129  | 180  |
| Tc00.1047053508781.80  | <i>T. cruzi</i> | 48  | 252  | 299  |
| Tc00.1047053508781.90  | <i>T. cruzi</i> | 40  | 101  | 140  |
| Tc00.1047053508787.14  | <i>T. cruzi</i> | 90  | 1    | 90   |
| Tc00.1047053508787.20  | <i>T. cruzi</i> | 280 | 97   | 376  |

|                        |                 |     |      |      |
|------------------------|-----------------|-----|------|------|
| Tc00.1047053508803.19  | <i>T. cruzi</i> | 47  | 228  | 274  |
| Tc00.1047053508803.19  | <i>T. cruzi</i> | 48  | 1600 | 1647 |
| Tc00.1047053508803.19  | <i>T. cruzi</i> | 48  | 1600 | 1647 |
| Tc00.1047053508805.100 | <i>T. cruzi</i> | 139 | 51   | 189  |
| Tc00.1047053508805.100 | <i>T. cruzi</i> | 94  | 230  | 323  |
| Tc00.1047053508805.100 | <i>T. cruzi</i> | 72  | 412  | 483  |
| Tc00.1047053508805.100 | <i>T. cruzi</i> | 84  | 603  | 686  |
| Tc00.1047053508805.100 | <i>T. cruzi</i> | 121 | 696  | 816  |
| Tc00.1047053508805.90  | <i>T. cruzi</i> | 125 | 1    | 125  |
| Tc00.1047053508809.30  | <i>T. cruzi</i> | 45  | 562  | 606  |
| Tc00.1047053508809.40  | <i>T. cruzi</i> | 116 | 1    | 116  |
| Tc00.1047053508809.40  | <i>T. cruzi</i> | 509 | 163  | 671  |
| Tc00.1047053508809.40  | <i>T. cruzi</i> | 76  | 943  | 1018 |
| Tc00.1047053508809.50  | <i>T. cruzi</i> | 260 | 46   | 305  |
| Tc00.1047053508811.10  | <i>T. cruzi</i> | 145 | 1    | 145  |
| Tc00.1047053508811.10  | <i>T. cruzi</i> | 47  | 161  | 207  |
| Tc00.1047053508811.10  | <i>T. cruzi</i> | 40  | 238  | 277  |
| Tc00.1047053508811.10  | <i>T. cruzi</i> | 40  | 494  | 533  |
| Tc00.1047053508811.10  | <i>T. cruzi</i> | 89  | 1100 | 1188 |
| Tc00.1047053508811.10  | <i>T. cruzi</i> | 42  | 1563 | 1604 |
| Tc00.1047053508811.30  | <i>T. cruzi</i> | 101 | 1    | 101  |
| Tc00.1047053508811.30  | <i>T. cruzi</i> | 44  | 207  | 250  |
| Tc00.1047053508811.30  | <i>T. cruzi</i> | 385 | 284  | 668  |
| Tc00.1047053508811.30  | <i>T. cruzi</i> | 347 | 931  | 1277 |
| Tc00.1047053508811.30  | <i>T. cruzi</i> | 95  | 1298 | 1392 |
| Tc00.1047053508811.30  | <i>T. cruzi</i> | 98  | 1653 | 1750 |
| Tc00.1047053508811.40  | <i>T. cruzi</i> | 96  | 60   | 155  |
| Tc00.1047053508811.55  | <i>T. cruzi</i> | 186 | 120  | 305  |
| Tc00.1047053508813.50  | <i>T. cruzi</i> | 96  | 73   | 168  |
| Tc00.1047053508813.60  | <i>T. cruzi</i> | 56  | 359  | 414  |
| Tc00.1047053508813.80  | <i>T. cruzi</i> | 45  | 1    | 45   |
| Tc00.1047053508831.10  | <i>T. cruzi</i> | 82  | 48   | 129  |
| Tc00.1047053508831.100 | <i>T. cruzi</i> | 182 | 20   | 201  |
| Tc00.1047053508831.140 | <i>T. cruzi</i> | 684 | 103  | 786  |
| Tc00.1047053508831.150 | <i>T. cruzi</i> | 151 | 1    | 151  |
| Tc00.1047053508831.150 | <i>T. cruzi</i> | 497 | 274  | 770  |
| Tc00.1047053508831.150 | <i>T. cruzi</i> | 634 | 889  | 1522 |
| Tc00.1047053508831.20  | <i>T. cruzi</i> | 44  | 465  | 508  |
| Tc00.1047053508831.250 | <i>T. cruzi</i> | 68  | 2848 | 2915 |
| Tc00.1047053508831.250 | <i>T. cruzi</i> | 81  | 3391 | 3471 |
| Tc00.1047053508831.250 | <i>T. cruzi</i> | 81  | 3391 | 3471 |
| Tc00.1047053508831.30  | <i>T. cruzi</i> | 88  | 129  | 216  |
| Tc00.1047053508831.30  | <i>T. cruzi</i> | 163 | 309  | 471  |
| Tc00.1047053508831.4   | <i>T. cruzi</i> | 125 | 61   | 185  |
| Tc00.1047053508831.4   | <i>T. cruzi</i> | 43  | 378  | 420  |
| Tc00.1047053508831.60  | <i>T. cruzi</i> | 70  | 61   | 130  |
| Tc00.1047053508831.60  | <i>T. cruzi</i> | 40  | 157  | 196  |

|                        |                 |     |      |      |
|------------------------|-----------------|-----|------|------|
| Tc00.1047053508831.60  | <i>T. cruzi</i> | 40  | 157  | 196  |
| Tc00.1047053508831.63  | <i>T. cruzi</i> | 46  | 75   | 120  |
| Tc00.1047053508831.63  | <i>T. cruzi</i> | 57  | 190  | 246  |
| Tc00.1047053508831.63  | <i>T. cruzi</i> | 57  | 190  | 246  |
| Tc00.1047053508831.66  | <i>T. cruzi</i> | 58  | 187  | 244  |
| Tc00.1047053508831.80  | <i>T. cruzi</i> | 77  | 1    | 77   |
| Tc00.1047053508837.100 | <i>T. cruzi</i> | 100 | 140  | 239  |
| Tc00.1047053508837.120 | <i>T. cruzi</i> | 45  | 183  | 227  |
| Tc00.1047053508837.130 | <i>T. cruzi</i> | 58  | 134  | 191  |
| Tc00.1047053508837.130 | <i>T. cruzi</i> | 92  | 287  | 378  |
| Tc00.1047053508837.140 | <i>T. cruzi</i> | 140 | 1    | 140  |
| Tc00.1047053508837.140 | <i>T. cruzi</i> | 78  | 181  | 258  |
| Tc00.1047053508837.140 | <i>T. cruzi</i> | 78  | 181  | 258  |
| Tc00.1047053508837.147 | <i>T. cruzi</i> | 48  | 527  | 574  |
| Tc00.1047053508837.147 | <i>T. cruzi</i> | 49  | 693  | 741  |
| Tc00.1047053508837.147 | <i>T. cruzi</i> | 49  | 693  | 741  |
| Tc00.1047053508837.154 | <i>T. cruzi</i> | 75  | 156  | 230  |
| Tc00.1047053508837.160 | <i>T. cruzi</i> | 43  | 21   | 63   |
| Tc00.1047053508837.170 | <i>T. cruzi</i> | 327 | 678  | 1004 |
| Tc00.1047053508837.170 | <i>T. cruzi</i> | 147 | 1063 | 1209 |
| Tc00.1047053508837.170 | <i>T. cruzi</i> | 147 | 1063 | 1209 |
| Tc00.1047053508837.180 | <i>T. cruzi</i> | 100 | 1    | 100  |
| Tc00.1047053508837.180 | <i>T. cruzi</i> | 48  | 118  | 165  |
| Tc00.1047053508837.180 | <i>T. cruzi</i> | 48  | 118  | 165  |
| Tc00.1047053508837.34  | <i>T. cruzi</i> | 49  | 1616 | 1664 |
| Tc00.1047053508837.70  | <i>T. cruzi</i> | 46  | 1    | 46   |
| Tc00.1047053508837.80  | <i>T. cruzi</i> | 81  | 1    | 81   |
| Tc00.1047053508837.80  | <i>T. cruzi</i> | 44  | 1296 | 1339 |
| Tc00.1047053508837.80  | <i>T. cruzi</i> | 69  | 1443 | 1511 |
| Tc00.1047053508837.80  | <i>T. cruzi</i> | 40  | 1821 | 1860 |
| Tc00.1047053508837.80  | <i>T. cruzi</i> | 44  | 1892 | 1935 |
| Tc00.1047053508837.80  | <i>T. cruzi</i> | 88  | 2002 | 2089 |
| Tc00.1047053508837.80  | <i>T. cruzi</i> | 120 | 2260 | 2379 |
| Tc00.1047053508837.80  | <i>T. cruzi</i> | 53  | 2498 | 2550 |
| Tc00.1047053508837.80  | <i>T. cruzi</i> | 44  | 2557 | 2600 |
| Tc00.1047053508837.80  | <i>T. cruzi</i> | 88  | 2602 | 2689 |
| Tc00.1047053508837.80  | <i>T. cruzi</i> | 102 | 2860 | 2961 |
| Tc00.1047053508837.80  | <i>T. cruzi</i> | 85  | 2997 | 3081 |
| Tc00.1047053508837.80  | <i>T. cruzi</i> | 188 | 3086 | 3273 |
| Tc00.1047053508837.80  | <i>T. cruzi</i> | 134 | 3334 | 3467 |
| Tc00.1047053508837.80  | <i>T. cruzi</i> | 238 | 3476 | 3713 |
| Tc00.1047053508839.20  | <i>T. cruzi</i> | 49  | 204  | 252  |
| Tc00.1047053508839.20  | <i>T. cruzi</i> | 88  | 265  | 352  |
| Tc00.1047053508839.20  | <i>T. cruzi</i> | 71  | 355  | 425  |
| Tc00.1047053508839.50  | <i>T. cruzi</i> | 75  | 1    | 75   |
| Tc00.1047053508839.50  | <i>T. cruzi</i> | 183 | 131  | 313  |
| Tc00.1047053508839.50  | <i>T. cruzi</i> | 129 | 459  | 587  |

|                        |                 |     |     |     |
|------------------------|-----------------|-----|-----|-----|
| Tc00.1047053508839.50  | <i>T. cruzi</i> | 60  | 651 | 710 |
| Tc00.1047053508839.70  | <i>T. cruzi</i> | 46  | 1   | 46  |
| Tc00.1047053508903.100 | <i>T. cruzi</i> | 48  | 30  | 77  |
| Tc00.1047053508921.10  | <i>T. cruzi</i> | 72  | 67  | 138 |
| Tc00.1047053508921.10  | <i>T. cruzi</i> | 41  | 267 | 307 |
| Tc00.1047053508921.10  | <i>T. cruzi</i> | 41  | 267 | 307 |
| Tc00.1047053508921.20  | <i>T. cruzi</i> | 65  | 211 | 275 |
| Tc00.1047053508921.30  | <i>T. cruzi</i> | 190 | 41  | 230 |
| Tc00.1047053508921.30  | <i>T. cruzi</i> | 43  | 435 | 477 |
| Tc00.1047053508921.30  | <i>T. cruzi</i> | 81  | 536 | 616 |
| Tc00.1047053508921.30  | <i>T. cruzi</i> | 102 | 639 | 740 |
| Tc00.1047053508927.10  | <i>T. cruzi</i> | 103 | 58  | 160 |
| Tc00.1047053508943.10  | <i>T. cruzi</i> | 211 | 1   | 211 |
| Tc00.1047053508943.20  | <i>T. cruzi</i> | 52  | 136 | 187 |
| Tc00.1047053508943.20  | <i>T. cruzi</i> | 54  | 354 | 407 |
| Tc00.1047053508943.20  | <i>T. cruzi</i> | 59  | 661 | 719 |
| Tc00.1047053508943.20  | <i>T. cruzi</i> | 78  | 762 | 839 |
| Tc00.1047053508943.30  | <i>T. cruzi</i> | 122 | 122 | 243 |
| Tc00.1047053508949.10  | <i>T. cruzi</i> | 59  | 55  | 113 |
| Tc00.1047053508949.20  | <i>T. cruzi</i> | 46  | 1   | 46  |
| Tc00.1047053508949.30  | <i>T. cruzi</i> | 87  | 1   | 87  |
| Tc00.1047053508949.30  | <i>T. cruzi</i> | 61  | 110 | 170 |
| Tc00.1047053508949.30  | <i>T. cruzi</i> | 52  | 379 | 430 |
| Tc00.1047053508949.30  | <i>T. cruzi</i> | 73  | 629 | 701 |
| Tc00.1047053508949.30  | <i>T. cruzi</i> | 83  | 822 | 904 |
| Tc00.1047053508949.40  | <i>T. cruzi</i> | 49  | 69  | 117 |
| Tc00.1047053508951.70  | <i>T. cruzi</i> | 109 | 664 | 772 |
| Tc00.1047053508951.90  | <i>T. cruzi</i> | 45  | 330 | 374 |
| Tc00.1047053508953.19  | <i>T. cruzi</i> | 81  | 303 | 383 |
| Tc00.1047053508953.28  | <i>T. cruzi</i> | 88  | 1   | 88  |
| Tc00.1047053508953.40  | <i>T. cruzi</i> | 48  | 90  | 137 |
| Tc00.1047053508955.10  | <i>T. cruzi</i> | 63  | 108 | 170 |
| Tc00.1047053508955.20  | <i>T. cruzi</i> | 74  | 13  | 86  |
| Tc00.1047053508955.20  | <i>T. cruzi</i> | 105 | 130 | 234 |
| Tc00.1047053508955.20  | <i>T. cruzi</i> | 105 | 130 | 234 |
| Tc00.1047053508973.110 | <i>T. cruzi</i> | 43  | 428 | 470 |
| Tc00.1047053508973.30  | <i>T. cruzi</i> | 49  | 392 | 440 |
| Tc00.1047053508973.50  | <i>T. cruzi</i> | 186 | 437 | 622 |
| Tc00.1047053508973.60  | <i>T. cruzi</i> | 47  | 167 | 213 |
| Tc00.1047053508973.60  | <i>T. cruzi</i> | 227 | 263 | 489 |
| Tc00.1047053508973.69  | <i>T. cruzi</i> | 53  | 37  | 89  |
| Tc00.1047053508973.80  | <i>T. cruzi</i> | 51  | 111 | 161 |
| Tc00.1047053508973.80  | <i>T. cruzi</i> | 41  | 230 | 270 |
| Tc00.1047053508973.80  | <i>T. cruzi</i> | 41  | 627 | 667 |
| Tc00.1047053508975.20  | <i>T. cruzi</i> | 67  | 1   | 67  |
| Tc00.1047053508975.20  | <i>T. cruzi</i> | 43  | 324 | 366 |
| Tc00.1047053508975.20  | <i>T. cruzi</i> | 43  | 324 | 366 |

|                        |                 |     |     |     |
|------------------------|-----------------|-----|-----|-----|
| Tc00.1047053508975.30  | <i>T. cruzi</i> | 59  | 39  | 97  |
| Tc00.1047053508977.10  | <i>T. cruzi</i> | 43  | 1   | 43  |
| Tc00.1047053508977.10  | <i>T. cruzi</i> | 51  | 112 | 162 |
| Tc00.1047053508977.10  | <i>T. cruzi</i> | 42  | 407 | 448 |
| Tc00.1047053508977.10  | <i>T. cruzi</i> | 121 | 707 | 827 |
| Tc00.1047053508977.120 | <i>T. cruzi</i> | 44  | 1   | 44  |
| Tc00.1047053508977.120 | <i>T. cruzi</i> | 42  | 123 | 164 |
| Tc00.1047053508977.120 | <i>T. cruzi</i> | 47  | 203 | 249 |
| Tc00.1047053508977.120 | <i>T. cruzi</i> | 43  | 408 | 450 |
| Tc00.1047053508977.120 | <i>T. cruzi</i> | 183 | 714 | 896 |
| Tc00.1047053508977.130 | <i>T. cruzi</i> | 370 | 72  | 441 |
| Tc00.1047053508977.20  | <i>T. cruzi</i> | 373 | 77  | 449 |
| Tc00.1047053508977.40  | <i>T. cruzi</i> | 48  | 1   | 48  |
| Tc00.1047053508977.40  | <i>T. cruzi</i> | 52  | 110 | 161 |
| Tc00.1047053508977.40  | <i>T. cruzi</i> | 45  | 207 | 251 |
| Tc00.1047053508977.40  | <i>T. cruzi</i> | 44  | 413 | 456 |
| Tc00.1047053508977.40  | <i>T. cruzi</i> | 184 | 714 | 897 |
| Tc00.1047053508977.50  | <i>T. cruzi</i> | 382 | 75  | 456 |
| Tc00.1047053508977.80  | <i>T. cruzi</i> | 47  | 1   | 47  |
| Tc00.1047053508977.80  | <i>T. cruzi</i> | 54  | 116 | 169 |
| Tc00.1047053508977.80  | <i>T. cruzi</i> | 42  | 412 | 453 |
| Tc00.1047053508977.80  | <i>T. cruzi</i> | 185 | 709 | 893 |
| Tc00.1047053508987.20  | <i>T. cruzi</i> | 207 | 34  | 240 |
| Tc00.1047053508987.30  | <i>T. cruzi</i> | 347 | 38  | 384 |
| Tc00.1047053508987.30  | <i>T. cruzi</i> | 158 | 387 | 544 |
| Tc00.1047053508987.30  | <i>T. cruzi</i> | 67  | 658 | 724 |
| Tc00.1047053508987.30  | <i>T. cruzi</i> | 47  | 804 | 850 |
| Tc00.1047053508987.9   | <i>T. cruzi</i> | 79  | 38  | 116 |
| Tc00.1047053508987.9   | <i>T. cruzi</i> | 77  | 488 | 564 |
| Tc00.1047053508987.9   | <i>T. cruzi</i> | 59  | 797 | 855 |
| Tc00.1047053508989.100 | <i>T. cruzi</i> | 77  | 82  | 158 |
| Tc00.1047053508989.100 | <i>T. cruzi</i> | 53  | 166 | 218 |
| Tc00.1047053508989.100 | <i>T. cruzi</i> | 143 | 385 | 527 |
| Tc00.1047053508989.30  | <i>T. cruzi</i> | 177 | 1   | 177 |
| Tc00.1047053508989.30  | <i>T. cruzi</i> | 96  | 322 | 417 |
| Tc00.1047053508989.50  | <i>T. cruzi</i> | 176 | 127 | 302 |
| Tc00.1047053508989.50  | <i>T. cruzi</i> | 59  | 926 | 984 |
| Tc00.1047053508989.60  | <i>T. cruzi</i> | 162 | 40  | 201 |
| Tc00.1047053508989.70  | <i>T. cruzi</i> | 42  | 42  | 83  |
| Tc00.1047053508989.80  | <i>T. cruzi</i> | 147 | 1   | 147 |
| Tc00.1047053508989.80  | <i>T. cruzi</i> | 70  | 154 | 223 |
| Tc00.1047053508989.80  | <i>T. cruzi</i> | 467 | 376 | 842 |
| Tc00.1047053508989.90  | <i>T. cruzi</i> | 79  | 1   | 79  |
| Tc00.1047053508989.90  | <i>T. cruzi</i> | 62  | 111 | 172 |
| Tc00.1047053508989.90  | <i>T. cruzi</i> | 42  | 370 | 411 |
| Tc00.1047053508995.10  | <i>T. cruzi</i> | 53  | 224 | 276 |
| Tc00.1047053508995.10  | <i>T. cruzi</i> | 51  | 301 | 351 |



|                       |                 |     |      |      |
|-----------------------|-----------------|-----|------|------|
| Tc00.1047053508995.10 | <i>T. cruzi</i> | 93  | 393  | 485  |
| Tc00.1047053508995.10 | <i>T. cruzi</i> | 49  | 753  | 801  |
| Tc00.1047053508995.10 | <i>T. cruzi</i> | 106 | 1129 | 1234 |
| Tc00.1047053508995.10 | <i>T. cruzi</i> | 115 | 1702 | 1816 |
| Tc00.1047053508995.20 | <i>T. cruzi</i> | 92  | 77   | 168  |
| Tc00.1047053508995.69 | <i>T. cruzi</i> | 73  | 113  | 185  |
| Tc00.1047053508995.69 | <i>T. cruzi</i> | 40  | 488  | 527  |
| Tc00.1047053508995.69 | <i>T. cruzi</i> | 88  | 673  | 760  |
| Tc00.1047053509007.10 | <i>T. cruzi</i> | 66  | 115  | 180  |
| Tc00.1047053509007.10 | <i>T. cruzi</i> | 59  | 336  | 394  |
| Tc00.1047053509007.10 | <i>T. cruzi</i> | 91  | 399  | 489  |
| Tc00.1047053509007.10 | <i>T. cruzi</i> | 93  | 585  | 677  |
| Tc00.1047053509007.10 | <i>T. cruzi</i> | 82  | 801  | 882  |
| Tc00.1047053509007.20 | <i>T. cruzi</i> | 680 | 1    | 680  |
| Tc00.1047053509007.20 | <i>T. cruzi</i> | 60  | 698  | 757  |
| Tc00.1047053509007.20 | <i>T. cruzi</i> | 96  | 811  | 906  |
| Tc00.1047053509007.20 | <i>T. cruzi</i> | 42  | 1055 | 1096 |
| Tc00.1047053509007.30 | <i>T. cruzi</i> | 126 | 1    | 126  |
| Tc00.1047053509007.30 | <i>T. cruzi</i> | 144 | 144  | 287  |
| Tc00.1047053509007.40 | <i>T. cruzi</i> | 162 | 21   | 182  |
| Tc00.1047053509007.40 | <i>T. cruzi</i> | 50  | 212  | 261  |
| Tc00.1047053509007.40 | <i>T. cruzi</i> | 135 | 311  | 445  |
| Tc00.1047053509007.50 | <i>T. cruzi</i> | 57  | 86   | 142  |
| Tc00.1047053509007.60 | <i>T. cruzi</i> | 83  | 1    | 83   |
| Tc00.1047053509007.60 | <i>T. cruzi</i> | 73  | 188  | 260  |
| Tc00.1047053509007.60 | <i>T. cruzi</i> | 59  | 646  | 704  |
| Tc00.1047053509007.70 | <i>T. cruzi</i> | 698 | 1    | 698  |
| Tc00.1047053509007.70 | <i>T. cruzi</i> | 49  | 733  | 781  |
| Tc00.1047053509007.70 | <i>T. cruzi</i> | 51  | 986  | 1036 |
| Tc00.1047053509007.70 | <i>T. cruzi</i> | 73  | 1195 | 1267 |
| Tc00.1047053509007.80 | <i>T. cruzi</i> | 239 | 19   | 257  |
| Tc00.1047053509007.80 | <i>T. cruzi</i> | 347 | 292  | 638  |
| Tc00.1047053509007.90 | <i>T. cruzi</i> | 104 | 1    | 104  |
| Tc00.1047053509007.90 | <i>T. cruzi</i> | 64  | 204  | 267  |
| Tc00.1047053509007.90 | <i>T. cruzi</i> | 54  | 490  | 543  |
| Tc00.1047053509009.10 | <i>T. cruzi</i> | 53  | 1    | 53   |
| Tc00.1047053509009.10 | <i>T. cruzi</i> | 70  | 103  | 172  |
| Tc00.1047053509009.10 | <i>T. cruzi</i> | 52  | 312  | 363  |
| Tc00.1047053509009.10 | <i>T. cruzi</i> | 129 | 408  | 536  |
| Tc00.1047053509009.10 | <i>T. cruzi</i> | 218 | 568  | 785  |
| Tc00.1047053509011.20 | <i>T. cruzi</i> | 41  | 683  | 723  |
| Tc00.1047053509011.20 | <i>T. cruzi</i> | 43  | 907  | 949  |
| Tc00.1047053509011.20 | <i>T. cruzi</i> | 200 | 1532 | 1731 |
| Tc00.1047053509011.30 | <i>T. cruzi</i> | 232 | 34   | 265  |
| Tc00.1047053509011.30 | <i>T. cruzi</i> | 124 | 340  | 463  |
| Tc00.1047053509011.40 | <i>T. cruzi</i> | 125 | 193  | 317  |
| Tc00.1047053509011.40 | <i>T. cruzi</i> | 59  | 343  | 401  |

|                        |                 |     |      |      |
|------------------------|-----------------|-----|------|------|
| Tc00.1047053509011.50  | <i>T. cruzi</i> | 83  | 87   | 169  |
| Tc00.1047053509011.60  | <i>T. cruzi</i> | 47  | 147  | 193  |
| Tc00.1047053509011.60  | <i>T. cruzi</i> | 70  | 459  | 528  |
| Tc00.1047053509011.60  | <i>T. cruzi</i> | 70  | 459  | 528  |
| Tc00.1047053509011.70  | <i>T. cruzi</i> | 57  | 107  | 163  |
| Tc00.1047053509011.80  | <i>T. cruzi</i> | 59  | 508  | 566  |
| Tc00.1047053509013.19  | <i>T. cruzi</i> | 58  | 579  | 636  |
| Tc00.1047053509067.30  | <i>T. cruzi</i> | 48  | 1    | 48   |
| Tc00.1047053509067.50  | <i>T. cruzi</i> | 97  | 32   | 128  |
| Tc00.1047053509067.50  | <i>T. cruzi</i> | 116 | 218  | 333  |
| Tc00.1047053509067.50  | <i>T. cruzi</i> | 76  | 450  | 525  |
| Tc00.1047053509067.60  | <i>T. cruzi</i> | 52  | 182  | 233  |
| Tc00.1047053509067.60  | <i>T. cruzi</i> | 444 | 284  | 727  |
| Tc00.1047053509067.60  | <i>T. cruzi</i> | 70  | 758  | 827  |
| Tc00.1047053509067.60  | <i>T. cruzi</i> | 106 | 879  | 984  |
| Tc00.1047053509067.60  | <i>T. cruzi</i> | 41  | 1004 | 1044 |
| Tc00.1047053509067.60  | <i>T. cruzi</i> | 495 | 1126 | 1620 |
| Tc00.1047053509069.20  | <i>T. cruzi</i> | 71  | 1    | 71   |
| Tc00.1047053509069.30  | <i>T. cruzi</i> | 96  | 31   | 126  |
| Tc00.1047053509069.40  | <i>T. cruzi</i> | 83  | 1    | 83   |
| Tc00.1047053509069.40  | <i>T. cruzi</i> | 47  | 89   | 135  |
| Tc00.1047053509069.40  | <i>T. cruzi</i> | 99  | 313  | 411  |
| Tc00.1047053509073.100 | <i>T. cruzi</i> | 43  | 1    | 43   |
| Tc00.1047053509073.100 | <i>T. cruzi</i> | 159 | 137  | 295  |
| Tc00.1047053509073.100 | <i>T. cruzi</i> | 70  | 329  | 398  |
| Tc00.1047053509073.110 | <i>T. cruzi</i> | 58  | 115  | 172  |
| Tc00.1047053509073.110 | <i>T. cruzi</i> | 68  | 303  | 370  |
| Tc00.1047053509073.110 | <i>T. cruzi</i> | 143 | 398  | 540  |
| Tc00.1047053509073.110 | <i>T. cruzi</i> | 77  | 606  | 682  |
| Tc00.1047053509073.30  | <i>T. cruzi</i> | 44  | 769  | 812  |
| Tc00.1047053509073.30  | <i>T. cruzi</i> | 42  | 914  | 955  |
| Tc00.1047053509073.30  | <i>T. cruzi</i> | 42  | 914  | 955  |
| Tc00.1047053509073.40  | <i>T. cruzi</i> | 42  | 80   | 121  |
| Tc00.1047053509073.40  | <i>T. cruzi</i> | 148 | 162  | 309  |
| Tc00.1047053509073.40  | <i>T. cruzi</i> | 40  | 359  | 398  |
| Tc00.1047053509073.40  | <i>T. cruzi</i> | 191 | 461  | 651  |
| Tc00.1047053509073.50  | <i>T. cruzi</i> | 43  | 48   | 90   |
| Tc00.1047053509073.80  | <i>T. cruzi</i> | 67  | 16   | 82   |
| Tc00.1047053509073.80  | <i>T. cruzi</i> | 51  | 139  | 189  |
| Tc00.1047053509073.80  | <i>T. cruzi</i> | 57  | 202  | 258  |
| Tc00.1047053509073.90  | <i>T. cruzi</i> | 176 | 92   | 267  |
| Tc00.1047053509073.90  | <i>T. cruzi</i> | 43  | 474  | 516  |
| Tc00.1047053509079.20  | <i>T. cruzi</i> | 239 | 27   | 265  |
| Tc00.1047053509081.10  | <i>T. cruzi</i> | 123 | 79   | 201  |
| Tc00.1047053509081.100 | <i>T. cruzi</i> | 161 | 20   | 180  |
| Tc00.1047053509081.110 | <i>T. cruzi</i> | 341 | 28   | 368  |
| Tc00.1047053509081.140 | <i>T. cruzi</i> | 187 | 27   | 213  |

|                        |                 |     |      |      |
|------------------------|-----------------|-----|------|------|
| Tc00.1047053509081.150 | <i>T. cruzi</i> | 336 | 27   | 362  |
| Tc00.1047053509081.166 | <i>T. cruzi</i> | 51  | 1    | 51   |
| Tc00.1047053509081.20  | <i>T. cruzi</i> | 315 | 97   | 411  |
| Tc00.1047053509095.10  | <i>T. cruzi</i> | 333 | 55   | 387  |
| Tc00.1047053509097.10  | <i>T. cruzi</i> | 98  | 59   | 156  |
| Tc00.1047053509097.10  | <i>T. cruzi</i> | 73  | 180  | 252  |
| Tc00.1047053509097.20  | <i>T. cruzi</i> | 52  | 1    | 52   |
| Tc00.1047053509097.20  | <i>T. cruzi</i> | 51  | 132  | 182  |
| Tc00.1047053509097.20  | <i>T. cruzi</i> | 59  | 290  | 348  |
| Tc00.1047053509097.60  | <i>T. cruzi</i> | 136 | 30   | 165  |
| Tc00.1047053509099.100 | <i>T. cruzi</i> | 89  | 172  | 260  |
| Tc00.1047053509099.100 | <i>T. cruzi</i> | 75  | 362  | 436  |
| Tc00.1047053509099.100 | <i>T. cruzi</i> | 75  | 362  | 436  |
| Tc00.1047053509099.120 | <i>T. cruzi</i> | 49  | 143  | 191  |
| Tc00.1047053509099.130 | <i>T. cruzi</i> | 86  | 1    | 86   |
| Tc00.1047053509099.130 | <i>T. cruzi</i> | 97  | 114  | 210  |
| Tc00.1047053509099.130 | <i>T. cruzi</i> | 87  | 247  | 333  |
| Tc00.1047053509099.130 | <i>T. cruzi</i> | 43  | 339  | 381  |
| Tc00.1047053509099.140 | <i>T. cruzi</i> | 158 | 41   | 198  |
| Tc00.1047053509099.150 | <i>T. cruzi</i> | 69  | 1    | 69   |
| Tc00.1047053509099.150 | <i>T. cruzi</i> | 82  | 104  | 185  |
| Tc00.1047053509099.150 | <i>T. cruzi</i> | 138 | 669  | 806  |
| Tc00.1047053509099.160 | <i>T. cruzi</i> | 43  | 36   | 78   |
| Tc00.1047053509099.160 | <i>T. cruzi</i> | 58  | 152  | 209  |
| Tc00.1047053509099.160 | <i>T. cruzi</i> | 83  | 340  | 422  |
| Tc00.1047053509099.160 | <i>T. cruzi</i> | 216 | 538  | 753  |
| Tc00.1047053509099.160 | <i>T. cruzi</i> | 47  | 796  | 842  |
| Tc00.1047053509099.160 | <i>T. cruzi</i> | 47  | 1009 | 1055 |
| Tc00.1047053509099.20  | <i>T. cruzi</i> | 128 | 294  | 421  |
| Tc00.1047053509099.20  | <i>T. cruzi</i> | 143 | 801  | 943  |
| Tc00.1047053509099.30  | <i>T. cruzi</i> | 108 | 266  | 373  |
| Tc00.1047053509099.30  | <i>T. cruzi</i> | 48  | 442  | 489  |
| Tc00.1047053509099.30  | <i>T. cruzi</i> | 106 | 553  | 658  |
| Tc00.1047053509099.40  | <i>T. cruzi</i> | 144 | 54   | 197  |
| Tc00.1047053509099.40  | <i>T. cruzi</i> | 171 | 279  | 449  |
| Tc00.1047053509099.5   | <i>T. cruzi</i> | 131 | 1    | 131  |
| Tc00.1047053509099.59  | <i>T. cruzi</i> | 44  | 123  | 166  |
| Tc00.1047053509099.59  | <i>T. cruzi</i> | 91  | 327  | 417  |
| Tc00.1047053509099.59  | <i>T. cruzi</i> | 91  | 327  | 417  |
| Tc00.1047053509099.70  | <i>T. cruzi</i> | 153 | 597  | 749  |
| Tc00.1047053509099.80  | <i>T. cruzi</i> | 80  | 26   | 105  |
| Tc00.1047053509099.80  | <i>T. cruzi</i> | 49  | 183  | 231  |
| Tc00.1047053509099.80  | <i>T. cruzi</i> | 115 | 284  | 398  |
| Tc00.1047053509099.80  | <i>T. cruzi</i> | 43  | 546  | 588  |
| Tc00.1047053509099.89  | <i>T. cruzi</i> | 54  | 1    | 54   |
| Tc00.1047053509103.10  | <i>T. cruzi</i> | 73  | 126  | 198  |
| Tc00.1047053509103.20  | <i>T. cruzi</i> | 58  | 42   | 99   |

|                        |                 |     |      |      |
|------------------------|-----------------|-----|------|------|
| Tc00.1047053509103.30  | <i>T. cruzi</i> | 108 | 1    | 108  |
| Tc00.1047053509103.39  | <i>T. cruzi</i> | 120 | 48   | 167  |
| Tc00.1047053509103.39  | <i>T. cruzi</i> | 55  | 327  | 381  |
| Tc00.1047053509103.39  | <i>T. cruzi</i> | 73  | 527  | 599  |
| Tc00.1047053509103.39  | <i>T. cruzi</i> | 49  | 800  | 848  |
| Tc00.1047053509123.10  | <i>T. cruzi</i> | 197 | 120  | 316  |
| Tc00.1047053509125.10  | <i>T. cruzi</i> | 40  | 848  | 887  |
| Tc00.1047053509127.110 | <i>T. cruzi</i> | 91  | 1    | 91   |
| Tc00.1047053509127.110 | <i>T. cruzi</i> | 51  | 236  | 286  |
| Tc00.1047053509127.110 | <i>T. cruzi</i> | 109 | 320  | 428  |
| Tc00.1047053509127.20  | <i>T. cruzi</i> | 306 | 90   | 395  |
| Tc00.1047053509127.20  | <i>T. cruzi</i> | 52  | 417  | 468  |
| Tc00.1047053509127.20  | <i>T. cruzi</i> | 108 | 543  | 650  |
| Tc00.1047053509127.20  | <i>T. cruzi</i> | 95  | 702  | 796  |
| Tc00.1047053509127.20  | <i>T. cruzi</i> | 110 | 828  | 937  |
| Tc00.1047053509127.30  | <i>T. cruzi</i> | 88  | 1    | 88   |
| Tc00.1047053509127.30  | <i>T. cruzi</i> | 102 | 132  | 233  |
| Tc00.1047053509127.40  | <i>T. cruzi</i> | 49  | 451  | 499  |
| Tc00.1047053509127.59  | <i>T. cruzi</i> | 136 | 126  | 261  |
| Tc00.1047053509127.70  | <i>T. cruzi</i> | 250 | 1    | 250  |
| Tc00.1047053509127.70  | <i>T. cruzi</i> | 231 | 283  | 513  |
| Tc00.1047053509127.70  | <i>T. cruzi</i> | 132 | 761  | 892  |
| Tc00.1047053509127.80  | <i>T. cruzi</i> | 74  | 1    | 74   |
| Tc00.1047053509127.80  | <i>T. cruzi</i> | 99  | 129  | 227  |
| Tc00.1047053509127.90  | <i>T. cruzi</i> | 46  | 204  | 249  |
| Tc00.1047053509129.10  | <i>T. cruzi</i> | 48  | 1    | 48   |
| Tc00.1047053509135.9   | <i>T. cruzi</i> | 254 | 23   | 276  |
| Tc00.1047053509137.20  | <i>T. cruzi</i> | 54  | 12   | 65   |
| Tc00.1047053509137.20  | <i>T. cruzi</i> | 49  | 263  | 311  |
| Tc00.1047053509137.20  | <i>T. cruzi</i> | 66  | 356  | 421  |
| Tc00.1047053509137.20  | <i>T. cruzi</i> | 70  | 464  | 533  |
| Tc00.1047053509137.20  | <i>T. cruzi</i> | 76  | 833  | 908  |
| Tc00.1047053509137.20  | <i>T. cruzi</i> | 46  | 1160 | 1205 |
| Tc00.1047053509137.20  | <i>T. cruzi</i> | 85  | 1379 | 1463 |
| Tc00.1047053509137.20  | <i>T. cruzi</i> | 129 | 1576 | 1704 |
| Tc00.1047053509137.20  | <i>T. cruzi</i> | 50  | 1744 | 1793 |
| Tc00.1047053509137.20  | <i>T. cruzi</i> | 70  | 2125 | 2194 |
| Tc00.1047053509137.20  | <i>T. cruzi</i> | 58  | 2224 | 2281 |
| Tc00.1047053509139.20  | <i>T. cruzi</i> | 48  | 44   | 91   |
| Tc00.1047053509139.20  | <i>T. cruzi</i> | 60  | 404  | 463  |
| Tc00.1047053509139.20  | <i>T. cruzi</i> | 60  | 404  | 463  |
| Tc00.1047053509141.10  | <i>T. cruzi</i> | 51  | 180  | 230  |
| Tc00.1047053509141.10  | <i>T. cruzi</i> | 55  | 533  | 587  |
| Tc00.1047053509141.10  | <i>T. cruzi</i> | 64  | 688  | 751  |
| Tc00.1047053509141.10  | <i>T. cruzi</i> | 47  | 807  | 853  |
| Tc00.1047053509141.10  | <i>T. cruzi</i> | 45  | 1208 | 1252 |
| Tc00.1047053509141.20  | <i>T. cruzi</i> | 51  | 25   | 75   |

|                        |                 |     |      |      |
|------------------------|-----------------|-----|------|------|
| Tc00.1047053509141.20  | <i>T. cruzi</i> | 156 | 94   | 249  |
| Tc00.1047053509141.30  | <i>T. cruzi</i> | 45  | 1    | 45   |
| Tc00.1047053509141.40  | <i>T. cruzi</i> | 48  | 1    | 48   |
| Tc00.1047053509143.10  | <i>T. cruzi</i> | 47  | 69   | 115  |
| Tc00.1047053509143.10  | <i>T. cruzi</i> | 51  | 220  | 270  |
| Tc00.1047053509143.10  | <i>T. cruzi</i> | 114 | 455  | 568  |
| Tc00.1047053509143.10  | <i>T. cruzi</i> | 41  | 743  | 783  |
| Tc00.1047053509143.10  | <i>T. cruzi</i> | 41  | 785  | 825  |
| Tc00.1047053509143.10  | <i>T. cruzi</i> | 70  | 878  | 947  |
| Tc00.1047053509143.10  | <i>T. cruzi</i> | 54  | 1222 | 1275 |
| Tc00.1047053509143.10  | <i>T. cruzi</i> | 80  | 1379 | 1458 |
| Tc00.1047053509145.19  | <i>T. cruzi</i> | 56  | 83   | 138  |
| Tc00.1047053509147.40  | <i>T. cruzi</i> | 48  | 57   | 104  |
| Tc00.1047053509147.40  | <i>T. cruzi</i> | 201 | 116  | 316  |
| Tc00.1047053509147.50  | <i>T. cruzi</i> | 50  | 34   | 83   |
| Tc00.1047053509149.30  | <i>T. cruzi</i> | 57  | 338  | 394  |
| Tc00.1047053509149.30  | <i>T. cruzi</i> | 61  | 542  | 602  |
| Tc00.1047053509149.30  | <i>T. cruzi</i> | 61  | 542  | 602  |
| Tc00.1047053509149.40  | <i>T. cruzi</i> | 91  | 28   | 118  |
| Tc00.1047053509149.40  | <i>T. cruzi</i> | 232 | 125  | 356  |
| Tc00.1047053509149.60  | <i>T. cruzi</i> | 91  | 28   | 118  |
| Tc00.1047053509149.60  | <i>T. cruzi</i> | 233 | 125  | 357  |
| Tc00.1047053509149.70  | <i>T. cruzi</i> | 83  | 1    | 83   |
| Tc00.1047053509149.70  | <i>T. cruzi</i> | 193 | 145  | 337  |
| Tc00.1047053509149.80  | <i>T. cruzi</i> | 53  | 1    | 53   |
| Tc00.1047053509149.80  | <i>T. cruzi</i> | 49  | 156  | 204  |
| Tc00.1047053509149.80  | <i>T. cruzi</i> | 111 | 383  | 493  |
| Tc00.1047053509149.80  | <i>T. cruzi</i> | 92  | 527  | 618  |
| Tc00.1047053509151.10  | <i>T. cruzi</i> | 56  | 1    | 56   |
| Tc00.1047053509151.10  | <i>T. cruzi</i> | 40  | 285  | 324  |
| Tc00.1047053509151.10  | <i>T. cruzi</i> | 380 | 359  | 738  |
| Tc00.1047053509151.10  | <i>T. cruzi</i> | 55  | 742  | 796  |
| Tc00.1047053509151.10  | <i>T. cruzi</i> | 43  | 829  | 871  |
| Tc00.1047053509151.100 | <i>T. cruzi</i> | 53  | 154  | 206  |
| Tc00.1047053509151.100 | <i>T. cruzi</i> | 50  | 258  | 307  |
| Tc00.1047053509151.100 | <i>T. cruzi</i> | 50  | 258  | 307  |
| Tc00.1047053509151.110 | <i>T. cruzi</i> | 103 | 1    | 103  |
| Tc00.1047053509151.110 | <i>T. cruzi</i> | 144 | 320  | 463  |
| Tc00.1047053509151.120 | <i>T. cruzi</i> | 74  | 1    | 74   |
| Tc00.1047053509151.120 | <i>T. cruzi</i> | 55  | 238  | 292  |
| Tc00.1047053509151.120 | <i>T. cruzi</i> | 65  | 478  | 542  |
| Tc00.1047053509151.120 | <i>T. cruzi</i> | 74  | 1271 | 1344 |
| Tc00.1047053509151.120 | <i>T. cruzi</i> | 67  | 1377 | 1443 |
| Tc00.1047053509151.130 | <i>T. cruzi</i> | 53  | 145  | 197  |
| Tc00.1047053509151.140 | <i>T. cruzi</i> | 129 | 11   | 139  |
| Tc00.1047053509151.20  | <i>T. cruzi</i> | 56  | 29   | 84   |
| Tc00.1047053509151.20  | <i>T. cruzi</i> | 172 | 115  | 286  |

|                        |                 |     |      |      |
|------------------------|-----------------|-----|------|------|
| Tc00.1047053509151.20  | <i>T. cruzi</i> | 172 | 115  | 286  |
| Tc00.1047053509151.40  | <i>T. cruzi</i> | 60  | 216  | 275  |
| Tc00.1047053509151.40  | <i>T. cruzi</i> | 175 | 283  | 457  |
| Tc00.1047053509151.50  | <i>T. cruzi</i> | 65  | 1    | 65   |
| Tc00.1047053509151.50  | <i>T. cruzi</i> | 76  | 133  | 208  |
| Tc00.1047053509151.50  | <i>T. cruzi</i> | 205 | 261  | 465  |
| Tc00.1047053509151.50  | <i>T. cruzi</i> | 85  | 535  | 619  |
| Tc00.1047053509151.50  | <i>T. cruzi</i> | 98  | 692  | 789  |
| Tc00.1047053509151.50  | <i>T. cruzi</i> | 63  | 792  | 854  |
| Tc00.1047053509151.50  | <i>T. cruzi</i> | 64  | 856  | 919  |
| Tc00.1047053509151.70  | <i>T. cruzi</i> | 137 | 1    | 137  |
| Tc00.1047053509151.90  | <i>T. cruzi</i> | 79  | 1    | 79   |
| Tc00.1047053509151.90  | <i>T. cruzi</i> | 138 | 118  | 255  |
| Tc00.1047053509153.10  | <i>T. cruzi</i> | 106 | 687  | 792  |
| Tc00.1047053509153.100 | <i>T. cruzi</i> | 50  | 1    | 50   |
| Tc00.1047053509153.110 | <i>T. cruzi</i> | 40  | 302  | 341  |
| Tc00.1047053509153.130 | <i>T. cruzi</i> | 92  | 138  | 229  |
| Tc00.1047053509153.139 | <i>T. cruzi</i> | 87  | 1    | 87   |
| Tc00.1047053509153.139 | <i>T. cruzi</i> | 97  | 274  | 370  |
| Tc00.1047053509153.139 | <i>T. cruzi</i> | 83  | 560  | 642  |
| Tc00.1047053509153.20  | <i>T. cruzi</i> | 293 | 291  | 583  |
| Tc00.1047053509153.30  | <i>T. cruzi</i> | 43  | 1    | 43   |
| Tc00.1047053509153.30  | <i>T. cruzi</i> | 116 | 70   | 185  |
| Tc00.1047053509153.30  | <i>T. cruzi</i> | 71  | 274  | 344  |
| Tc00.1047053509153.30  | <i>T. cruzi</i> | 102 | 350  | 451  |
| Tc00.1047053509153.30  | <i>T. cruzi</i> | 59  | 481  | 539  |
| Tc00.1047053509153.40  | <i>T. cruzi</i> | 74  | 1    | 74   |
| Tc00.1047053509153.40  | <i>T. cruzi</i> | 52  | 527  | 578  |
| Tc00.1047053509153.40  | <i>T. cruzi</i> | 53  | 626  | 678  |
| Tc00.1047053509153.40  | <i>T. cruzi</i> | 53  | 1359 | 1411 |
| Tc00.1047053509153.40  | <i>T. cruzi</i> | 41  | 1772 | 1812 |
| Tc00.1047053509153.40  | <i>T. cruzi</i> | 60  | 1865 | 1924 |
| Tc00.1047053509153.50  | <i>T. cruzi</i> | 81  | 43   | 123  |
| Tc00.1047053509153.50  | <i>T. cruzi</i> | 71  | 140  | 210  |
| Tc00.1047053509153.60  | <i>T. cruzi</i> | 78  | 85   | 162  |
| Tc00.1047053509153.60  | <i>T. cruzi</i> | 75  | 260  | 334  |
| Tc00.1047053509153.60  | <i>T. cruzi</i> | 61  | 339  | 399  |
| Tc00.1047053509153.60  | <i>T. cruzi</i> | 99  | 632  | 730  |
| Tc00.1047053509153.60  | <i>T. cruzi</i> | 111 | 754  | 864  |
| Tc00.1047053509153.70  | <i>T. cruzi</i> | 52  | 149  | 200  |
| Tc00.1047053509153.80  | <i>T. cruzi</i> | 45  | 316  | 360  |
| Tc00.1047053509153.80  | <i>T. cruzi</i> | 46  | 537  | 582  |
| Tc00.1047053509153.80  | <i>T. cruzi</i> | 46  | 537  | 582  |
| Tc00.1047053509155.30  | <i>T. cruzi</i> | 167 | 1    | 167  |
| Tc00.1047053509155.30  | <i>T. cruzi</i> | 81  | 811  | 891  |
| Tc00.1047053509155.39  | <i>T. cruzi</i> | 110 | 237  | 346  |
| Tc00.1047053509157.100 | <i>T. cruzi</i> | 104 | 1    | 104  |

|                        |                 |     |     |      |
|------------------------|-----------------|-----|-----|------|
| Tc00.1047053509157.100 | <i>T. cruzi</i> | 128 | 276 | 403  |
| Tc00.1047053509157.110 | <i>T. cruzi</i> | 68  | 76  | 143  |
| Tc00.1047053509157.110 | <i>T. cruzi</i> | 51  | 580 | 630  |
| Tc00.1047053509157.110 | <i>T. cruzi</i> | 51  | 580 | 630  |
| Tc00.1047053509157.120 | <i>T. cruzi</i> | 746 | 306 | 1051 |
| Tc00.1047053509157.170 | <i>T. cruzi</i> | 274 | 681 | 954  |
| Tc00.1047053509157.210 | <i>T. cruzi</i> | 85  | 120 | 204  |
| Tc00.1047053509157.230 | <i>T. cruzi</i> | 66  | 20  | 85   |
| Tc00.1047053509157.230 | <i>T. cruzi</i> | 50  | 839 | 888  |
| Tc00.1047053509157.230 | <i>T. cruzi</i> | 50  | 839 | 888  |
| Tc00.1047053509157.240 | <i>T. cruzi</i> | 54  | 1   | 54   |
| Tc00.1047053509157.250 | <i>T. cruzi</i> | 125 | 362 | 486  |
| Tc00.1047053509157.260 | <i>T. cruzi</i> | 137 | 220 | 356  |
| Tc00.1047053509157.270 | <i>T. cruzi</i> | 57  | 186 | 242  |
| Tc00.1047053509157.40  | <i>T. cruzi</i> | 112 | 47  | 158  |
| Tc00.1047053509157.40  | <i>T. cruzi</i> | 48  | 236 | 283  |
| Tc00.1047053509157.90  | <i>T. cruzi</i> | 297 | 1   | 297  |
| Tc00.1047053509157.90  | <i>T. cruzi</i> | 438 | 337 | 774  |
| Tc00.1047053509165.30  | <i>T. cruzi</i> | 95  | 138 | 232  |
| Tc00.1047053509165.34  | <i>T. cruzi</i> | 102 | 124 | 225  |
| Tc00.1047053509165.40  | <i>T. cruzi</i> | 53  | 55  | 107  |
| Tc00.1047053509167.100 | <i>T. cruzi</i> | 51  | 925 | 975  |
| Tc00.1047053509167.140 | <i>T. cruzi</i> | 164 | 129 | 292  |
| Tc00.1047053509167.160 | <i>T. cruzi</i> | 98  | 1   | 98   |
| Tc00.1047053509167.160 | <i>T. cruzi</i> | 108 | 163 | 270  |
| Tc00.1047053509167.160 | <i>T. cruzi</i> | 179 | 320 | 498  |
| Tc00.1047053509167.160 | <i>T. cruzi</i> | 44  | 620 | 663  |
| Tc00.1047053509167.170 | <i>T. cruzi</i> | 87  | 1   | 87   |
| Tc00.1047053509167.180 | <i>T. cruzi</i> | 47  | 1   | 47   |
| Tc00.1047053509167.180 | <i>T. cruzi</i> | 119 | 409 | 527  |
| Tc00.1047053509167.180 | <i>T. cruzi</i> | 203 | 580 | 782  |
| Tc00.1047053509167.180 | <i>T. cruzi</i> | 46  | 788 | 833  |
| Tc00.1047053509167.180 | <i>T. cruzi</i> | 102 | 984 | 1085 |
| Tc00.1047053509167.190 | <i>T. cruzi</i> | 41  | 938 | 978  |
| Tc00.1047053509167.30  | <i>T. cruzi</i> | 47  | 106 | 152  |
| Tc00.1047053509167.40  | <i>T. cruzi</i> | 51  | 125 | 175  |
| Tc00.1047053509167.40  | <i>T. cruzi</i> | 43  | 671 | 713  |
| Tc00.1047053509167.40  | <i>T. cruzi</i> | 43  | 671 | 713  |
| Tc00.1047053509167.50  | <i>T. cruzi</i> | 42  | 256 | 297  |
| Tc00.1047053509167.60  | <i>T. cruzi</i> | 403 | 1   | 403  |
| Tc00.1047053509169.20  | <i>T. cruzi</i> | 57  | 1   | 57   |
| Tc00.1047053509169.20  | <i>T. cruzi</i> | 51  | 228 | 278  |
| Tc00.1047053509171.10  | <i>T. cruzi</i> | 214 | 97  | 310  |
| Tc00.1047053509171.20  | <i>T. cruzi</i> | 105 | 47  | 151  |
| Tc00.1047053509171.20  | <i>T. cruzi</i> | 73  | 157 | 229  |
| Tc00.1047053509171.20  | <i>T. cruzi</i> | 47  | 351 | 397  |
| Tc00.1047053509171.40  | <i>T. cruzi</i> | 54  | 238 | 291  |

|                        |                 |     |      |      |
|------------------------|-----------------|-----|------|------|
| Tc00.1047053509171.40  | <i>T. cruzi</i> | 51  | 378  | 428  |
| Tc00.1047053509171.40  | <i>T. cruzi</i> | 41  | 630  | 670  |
| Tc00.1047053509171.54  | <i>T. cruzi</i> | 70  | 42   | 111  |
| Tc00.1047053509171.60  | <i>T. cruzi</i> | 96  | 293  | 388  |
| Tc00.1047053509171.70  | <i>T. cruzi</i> | 400 | 108  | 507  |
| Tc00.1047053509171.80  | <i>T. cruzi</i> | 110 | 1    | 110  |
| Tc00.1047053509171.80  | <i>T. cruzi</i> | 186 | 188  | 373  |
| Tc00.1047053509171.90  | <i>T. cruzi</i> | 76  | 343  | 418  |
| Tc00.1047053509195.10  | <i>T. cruzi</i> | 140 | 15   | 154  |
| Tc00.1047053509195.30  | <i>T. cruzi</i> | 198 | 86   | 283  |
| Tc00.1047053509195.40  | <i>T. cruzi</i> | 170 | 28   | 197  |
| Tc00.1047053509195.50  | <i>T. cruzi</i> | 187 | 54   | 240  |
| Tc00.1047053509195.61  | <i>T. cruzi</i> | 190 | 27   | 216  |
| Tc00.1047053509195.70  | <i>T. cruzi</i> | 312 | 76   | 387  |
| Tc00.1047053509197.20  | <i>T. cruzi</i> | 46  | 1    | 46   |
| Tc00.1047053509197.39  | <i>T. cruzi</i> | 54  | 154  | 207  |
| Tc00.1047053509199.10  | <i>T. cruzi</i> | 71  | 290  | 360  |
| Tc00.1047053509203.14  | <i>T. cruzi</i> | 309 | 72   | 380  |
| Tc00.1047053509203.20  | <i>T. cruzi</i> | 55  | 19   | 73   |
| Tc00.1047053509203.20  | <i>T. cruzi</i> | 235 | 122  | 356  |
| Tc00.1047053509203.20  | <i>T. cruzi</i> | 61  | 375  | 435  |
| Tc00.1047053509203.20  | <i>T. cruzi</i> | 82  | 472  | 553  |
| Tc00.1047053509203.50  | <i>T. cruzi</i> | 216 | 214  | 429  |
| Tc00.1047053509203.50  | <i>T. cruzi</i> | 378 | 438  | 815  |
| Tc00.1047053509203.60  | <i>T. cruzi</i> | 59  | 418  | 476  |
| Tc00.1047053509203.60  | <i>T. cruzi</i> | 44  | 525  | 568  |
| Tc00.1047053509203.70  | <i>T. cruzi</i> | 52  | 1034 | 1085 |
| Tc00.1047053509203.70  | <i>T. cruzi</i> | 353 | 1132 | 1484 |
| Tc00.1047053509205.20  | <i>T. cruzi</i> | 216 | 1    | 216  |
| Tc00.1047053509205.20  | <i>T. cruzi</i> | 78  | 244  | 321  |
| Tc00.1047053509205.20  | <i>T. cruzi</i> | 44  | 342  | 385  |
| Tc00.1047053509205.30  | <i>T. cruzi</i> | 57  | 46   | 102  |
| Tc00.1047053509205.40  | <i>T. cruzi</i> | 73  | 1    | 73   |
| Tc00.1047053509205.40  | <i>T. cruzi</i> | 128 | 139  | 266  |
| Tc00.1047053509205.40  | <i>T. cruzi</i> | 131 | 301  | 431  |
| Tc00.1047053509205.50  | <i>T. cruzi</i> | 50  | 214  | 263  |
| Tc00.1047053509231.20  | <i>T. cruzi</i> | 166 | 311  | 476  |
| Tc00.1047053509231.20  | <i>T. cruzi</i> | 64  | 524  | 587  |
| Tc00.1047053509231.20  | <i>T. cruzi</i> | 64  | 524  | 587  |
| Tc00.1047053509231.26  | <i>T. cruzi</i> | 50  | 383  | 432  |
| Tc00.1047053509231.50  | <i>T. cruzi</i> | 89  | 44   | 132  |
| Tc00.1047053509231.50  | <i>T. cruzi</i> | 81  | 152  | 232  |
| Tc00.1047053509233.10  | <i>T. cruzi</i> | 70  | 1    | 70   |
| Tc00.1047053509233.120 | <i>T. cruzi</i> | 40  | 119  | 158  |
| Tc00.1047053509233.120 | <i>T. cruzi</i> | 142 | 217  | 358  |
| Tc00.1047053509233.120 | <i>T. cruzi</i> | 49  | 1747 | 1795 |
| Tc00.1047053509233.120 | <i>T. cruzi</i> | 40  | 1977 | 2016 |



|                        |                 |      |      |      |
|------------------------|-----------------|------|------|------|
| Tc00.1047053509233.120 | <i>T. cruzi</i> | 95   | 2858 | 2952 |
| Tc00.1047053509233.160 | <i>T. cruzi</i> | 117  | 212  | 328  |
| Tc00.1047053509233.190 | <i>T. cruzi</i> | 44   | 1    | 44   |
| Tc00.1047053509233.200 | <i>T. cruzi</i> | 82   | 1    | 82   |
| Tc00.1047053509233.200 | <i>T. cruzi</i> | 47   | 264  | 310  |
| Tc00.1047053509233.220 | <i>T. cruzi</i> | 42   | 65   | 106  |
| Tc00.1047053509233.220 | <i>T. cruzi</i> | 47   | 179  | 225  |
| Tc00.1047053509233.220 | <i>T. cruzi</i> | 59   | 335  | 393  |
| Tc00.1047053509233.220 | <i>T. cruzi</i> | 57   | 729  | 785  |
| Tc00.1047053509233.230 | <i>T. cruzi</i> | 54   | 34   | 87   |
| Tc00.1047053509233.230 | <i>T. cruzi</i> | 47   | 233  | 279  |
| Tc00.1047053509233.230 | <i>T. cruzi</i> | 44   | 471  | 514  |
| Tc00.1047053509233.230 | <i>T. cruzi</i> | 80   | 527  | 606  |
| Tc00.1047053509233.230 | <i>T. cruzi</i> | 56   | 1050 | 1105 |
| Tc00.1047053509233.70  | <i>T. cruzi</i> | 49   | 52   | 100  |
| Tc00.1047053509233.70  | <i>T. cruzi</i> | 126  | 150  | 275  |
| Tc00.1047053509233.70  | <i>T. cruzi</i> | 280  | 279  | 558  |
| Tc00.1047053509233.80  | <i>T. cruzi</i> | 53   | 42   | 94   |
| Tc00.1047053509233.80  | <i>T. cruzi</i> | 41   | 117  | 157  |
| Tc00.1047053509233.80  | <i>T. cruzi</i> | 41   | 117  | 157  |
| Tc00.1047053509247.10  | <i>T. cruzi</i> | 44   | 1    | 44   |
| Tc00.1047053509247.10  | <i>T. cruzi</i> | 96   | 63   | 158  |
| Tc00.1047053509247.10  | <i>T. cruzi</i> | 111  | 298  | 408  |
| Tc00.1047053509247.10  | <i>T. cruzi</i> | 42   | 493  | 534  |
| Tc00.1047053509247.10  | <i>T. cruzi</i> | 114  | 742  | 855  |
| Tc00.1047053509247.10  | <i>T. cruzi</i> | 72   | 868  | 939  |
| Tc00.1047053509247.20  | <i>T. cruzi</i> | 130  | 162  | 291  |
| Tc00.1047053509247.30  | <i>T. cruzi</i> | 47   | 56   | 102  |
| Tc00.1047053509247.30  | <i>T. cruzi</i> | 46   | 361  | 406  |
| Tc00.1047053509247.30  | <i>T. cruzi</i> | 72   | 778  | 849  |
| Tc00.1047053509247.30  | <i>T. cruzi</i> | 107  | 1097 | 1203 |
| Tc00.1047053509247.30  | <i>T. cruzi</i> | 84   | 1615 | 1698 |
| Tc00.1047053509247.30  | <i>T. cruzi</i> | 69   | 1717 | 1785 |
| Tc00.1047053509265.110 | <i>T. cruzi</i> | 42   | 1    | 42   |
| Tc00.1047053509265.110 | <i>T. cruzi</i> | 1068 | 681  | 1748 |
| Tc00.1047053509265.120 | <i>T. cruzi</i> | 213  | 515  | 727  |
| Tc00.1047053509265.90  | <i>T. cruzi</i> | 48   | 1    | 48   |
| Tc00.1047053509265.90  | <i>T. cruzi</i> | 87   | 692  | 778  |
| Tc00.1047053509267.10  | <i>T. cruzi</i> | 44   | 291  | 334  |
| Tc00.1047053509267.10  | <i>T. cruzi</i> | 176  | 1055 | 1230 |
| Tc00.1047053509267.100 | <i>T. cruzi</i> | 69   | 439  | 507  |
| Tc00.1047053509267.110 | <i>T. cruzi</i> | 49   | 1    | 49   |
| Tc00.1047053509267.110 | <i>T. cruzi</i> | 82   | 127  | 208  |
| Tc00.1047053509267.110 | <i>T. cruzi</i> | 82   | 127  | 208  |
| Tc00.1047053509267.20  | <i>T. cruzi</i> | 58   | 1    | 58   |
| Tc00.1047053509267.20  | <i>T. cruzi</i> | 218  | 65   | 282  |
| Tc00.1047053509267.20  | <i>T. cruzi</i> | 330  | 291  | 620  |

|                       |                 |      |      |      |
|-----------------------|-----------------|------|------|------|
| Tc00.1047053509267.50 | <i>T. cruzi</i> | 82   | 1    | 82   |
| Tc00.1047053509267.70 | <i>T. cruzi</i> | 84   | 80   | 163  |
| Tc00.1047053509267.70 | <i>T. cruzi</i> | 91   | 168  | 258  |
| Tc00.1047053509267.70 | <i>T. cruzi</i> | 270  | 303  | 572  |
| Tc00.1047053509267.70 | <i>T. cruzi</i> | 136  | 576  | 711  |
| Tc00.1047053509267.70 | <i>T. cruzi</i> | 164  | 825  | 988  |
| Tc00.1047053509267.90 | <i>T. cruzi</i> | 156  | 1    | 156  |
| Tc00.1047053509267.90 | <i>T. cruzi</i> | 56   | 381  | 436  |
| Tc00.1047053509267.90 | <i>T. cruzi</i> | 42   | 662  | 703  |
| Tc00.1047053509269.4  | <i>T. cruzi</i> | 40   | 1    | 40   |
| Tc00.1047053509269.4  | <i>T. cruzi</i> | 1044 | 211  | 1254 |
| Tc00.1047053509279.10 | <i>T. cruzi</i> | 51   | 1    | 51   |
| Tc00.1047053509279.10 | <i>T. cruzi</i> | 72   | 132  | 203  |
| Tc00.1047053509279.10 | <i>T. cruzi</i> | 72   | 132  | 203  |
| Tc00.1047053509293.10 | <i>T. cruzi</i> | 137  | 197  | 333  |
| Tc00.1047053509297.10 | <i>T. cruzi</i> | 57   | 1    | 57   |
| Tc00.1047053509297.10 | <i>T. cruzi</i> | 125  | 70   | 194  |
| Tc00.1047053509297.10 | <i>T. cruzi</i> | 114  | 299  | 412  |
| Tc00.1047053509297.10 | <i>T. cruzi</i> | 80   | 566  | 645  |
| Tc00.1047053509297.10 | <i>T. cruzi</i> | 60   | 753  | 812  |
| Tc00.1047053509297.10 | <i>T. cruzi</i> | 323  | 935  | 1257 |
| Tc00.1047053509297.10 | <i>T. cruzi</i> | 343  | 1283 | 1625 |
| Tc00.1047053509297.20 | <i>T. cruzi</i> | 53   | 1    | 53   |
| Tc00.1047053509297.20 | <i>T. cruzi</i> | 61   | 60   | 120  |
| Tc00.1047053509297.20 | <i>T. cruzi</i> | 141  | 131  | 271  |
| Tc00.1047053509341.20 | <i>T. cruzi</i> | 53   | 256  | 308  |
| Tc00.1047053509341.20 | <i>T. cruzi</i> | 55   | 353  | 407  |
| Tc00.1047053509341.20 | <i>T. cruzi</i> | 349  | 443  | 791  |
| Tc00.1047053509349.30 | <i>T. cruzi</i> | 116  | 21   | 136  |
| Tc00.1047053509351.6  | <i>T. cruzi</i> | 191  | 1    | 191  |
| Tc00.1047053509377.20 | <i>T. cruzi</i> | 90   | 695  | 784  |
| Tc00.1047053509381.10 | <i>T. cruzi</i> | 57   | 71   | 127  |
| Tc00.1047053509381.29 | <i>T. cruzi</i> | 68   | 400  | 467  |
| Tc00.1047053509391.10 | <i>T. cruzi</i> | 60   | 1    | 60   |
| Tc00.1047053509391.20 | <i>T. cruzi</i> | 60   | 1    | 60   |
| Tc00.1047053509391.30 | <i>T. cruzi</i> | 60   | 1    | 60   |
| Tc00.1047053509393.10 | <i>T. cruzi</i> | 42   | 1    | 42   |
| Tc00.1047053509393.20 | <i>T. cruzi</i> | 43   | 100  | 142  |
| Tc00.1047053509393.30 | <i>T. cruzi</i> | 42   | 154  | 195  |
| Tc00.1047053509393.30 | <i>T. cruzi</i> | 87   | 227  | 313  |
| Tc00.1047053509393.40 | <i>T. cruzi</i> | 56   | 126  | 181  |
| Tc00.1047053509393.40 | <i>T. cruzi</i> | 45   | 790  | 834  |
| Tc00.1047053509393.40 | <i>T. cruzi</i> | 45   | 790  | 834  |
| Tc00.1047053509393.50 | <i>T. cruzi</i> | 882  | 1    | 882  |
| Tc00.1047053509433.10 | <i>T. cruzi</i> | 119  | 56   | 174  |
| Tc00.1047053509433.30 | <i>T. cruzi</i> | 196  | 34   | 229  |
| Tc00.1047053509443.20 | <i>T. cruzi</i> | 76   | 463  | 538  |

|                        |                 |     |      |      |
|------------------------|-----------------|-----|------|------|
| Tc00.1047053509443.39  | <i>T. cruzi</i> | 51  | 21   | 71   |
| Tc00.1047053509445.20  | <i>T. cruzi</i> | 67  | 74   | 140  |
| Tc00.1047053509445.20  | <i>T. cruzi</i> | 50  | 147  | 196  |
| Tc00.1047053509445.20  | <i>T. cruzi</i> | 258 | 211  | 468  |
| Tc00.1047053509445.30  | <i>T. cruzi</i> | 41  | 299  | 339  |
| Tc00.1047053509451.24  | <i>T. cruzi</i> | 48  | 176  | 223  |
| Tc00.1047053509451.24  | <i>T. cruzi</i> | 62  | 333  | 394  |
| Tc00.1047053509451.24  | <i>T. cruzi</i> | 54  | 727  | 780  |
| Tc00.1047053509451.50  | <i>T. cruzi</i> | 50  | 35   | 84   |
| Tc00.1047053509451.50  | <i>T. cruzi</i> | 48  | 230  | 277  |
| Tc00.1047053509451.50  | <i>T. cruzi</i> | 49  | 468  | 516  |
| Tc00.1047053509451.50  | <i>T. cruzi</i> | 88  | 523  | 610  |
| Tc00.1047053509451.50  | <i>T. cruzi</i> | 69  | 1048 | 1116 |
| Tc00.1047053509451.70  | <i>T. cruzi</i> | 77  | 26   | 102  |
| Tc00.1047053509451.70  | <i>T. cruzi</i> | 52  | 452  | 503  |
| Tc00.1047053509451.70  | <i>T. cruzi</i> | 94  | 786  | 879  |
| Tc00.1047053509451.70  | <i>T. cruzi</i> | 43  | 966  | 1008 |
| Tc00.1047053509451.70  | <i>T. cruzi</i> | 90  | 1145 | 1234 |
| Tc00.1047053509453.10  | <i>T. cruzi</i> | 41  | 123  | 163  |
| Tc00.1047053509453.10  | <i>T. cruzi</i> | 52  | 334  | 385  |
| Tc00.1047053509453.10  | <i>T. cruzi</i> | 81  | 415  | 495  |
| Tc00.1047053509453.20  | <i>T. cruzi</i> | 74  | 1    | 74   |
| Tc00.1047053509453.20  | <i>T. cruzi</i> | 61  | 80   | 140  |
| Tc00.1047053509453.30  | <i>T. cruzi</i> | 114 | 1    | 114  |
| Tc00.1047053509453.60  | <i>T. cruzi</i> | 176 | 273  | 448  |
| Tc00.1047053509453.60  | <i>T. cruzi</i> | 51  | 456  | 506  |
| Tc00.1047053509453.60  | <i>T. cruzi</i> | 51  | 456  | 506  |
| Tc00.1047053509453.70  | <i>T. cruzi</i> | 270 | 81   | 350  |
| Tc00.1047053509453.79  | <i>T. cruzi</i> | 64  | 228  | 291  |
| Tc00.1047053509453.79  | <i>T. cruzi</i> | 144 | 473  | 616  |
| Tc00.1047053509453.79  | <i>T. cruzi</i> | 69  | 671  | 739  |
| Tc00.1047053509455.100 | <i>T. cruzi</i> | 97  | 295  | 391  |
| Tc00.1047053509455.110 | <i>T. cruzi</i> | 41  | 95   | 135  |
| Tc00.1047053509455.120 | <i>T. cruzi</i> | 52  | 126  | 177  |
| Tc00.1047053509455.130 | <i>T. cruzi</i> | 48  | 234  | 281  |
| Tc00.1047053509455.130 | <i>T. cruzi</i> | 74  | 683  | 756  |
| Tc00.1047053509455.130 | <i>T. cruzi</i> | 74  | 683  | 756  |
| Tc00.1047053509455.140 | <i>T. cruzi</i> | 47  | 333  | 379  |
| Tc00.1047053509455.20  | <i>T. cruzi</i> | 81  | 1    | 81   |
| Tc00.1047053509455.20  | <i>T. cruzi</i> | 61  | 447  | 507  |
| Tc00.1047053509455.20  | <i>T. cruzi</i> | 44  | 785  | 828  |
| Tc00.1047053509455.30  | <i>T. cruzi</i> | 88  | 145  | 232  |
| Tc00.1047053509455.30  | <i>T. cruzi</i> | 83  | 312  | 394  |
| Tc00.1047053509455.40  | <i>T. cruzi</i> | 85  | 38   | 122  |
| Tc00.1047053509455.40  | <i>T. cruzi</i> | 100 | 150  | 249  |
| Tc00.1047053509455.60  | <i>T. cruzi</i> | 48  | 1    | 48   |
| Tc00.1047053509455.60  | <i>T. cruzi</i> | 77  | 76   | 152  |

|                        |                 |     |      |      |
|------------------------|-----------------|-----|------|------|
| Tc00.1047053509455.60  | <i>T. cruzi</i> | 189 | 307  | 495  |
| Tc00.1047053509455.70  | <i>T. cruzi</i> | 58  | 178  | 235  |
| Tc00.1047053509455.70  | <i>T. cruzi</i> | 72  | 445  | 516  |
| Tc00.1047053509455.70  | <i>T. cruzi</i> | 72  | 445  | 516  |
| Tc00.1047053509455.9   | <i>T. cruzi</i> | 207 | 18   | 224  |
| Tc00.1047053509455.9   | <i>T. cruzi</i> | 154 | 260  | 413  |
| Tc00.1047053509455.9   | <i>T. cruzi</i> | 53  | 480  | 532  |
| Tc00.1047053509455.90  | <i>T. cruzi</i> | 50  | 184  | 233  |
| Tc00.1047053509455.90  | <i>T. cruzi</i> | 227 | 275  | 501  |
| Tc00.1047053509489.10  | <i>T. cruzi</i> | 134 | 350  | 483  |
| Tc00.1047053509489.20  | <i>T. cruzi</i> | 81  | 97   | 177  |
| Tc00.1047053509489.20  | <i>T. cruzi</i> | 73  | 184  | 256  |
| Tc00.1047053509489.20  | <i>T. cruzi</i> | 115 | 262  | 376  |
| Tc00.1047053509497.20  | <i>T. cruzi</i> | 110 | 1    | 110  |
| Tc00.1047053509497.20  | <i>T. cruzi</i> | 101 | 163  | 263  |
| Tc00.1047053509497.20  | <i>T. cruzi</i> | 56  | 302  | 357  |
| Tc00.1047053509499.10  | <i>T. cruzi</i> | 71  | 188  | 258  |
| Tc00.1047053509499.4   | <i>T. cruzi</i> | 42  | 16   | 57   |
| Tc00.1047053509499.4   | <i>T. cruzi</i> | 116 | 73   | 188  |
| Tc00.1047053509499.4   | <i>T. cruzi</i> | 116 | 73   | 188  |
| Tc00.1047053509513.10  | <i>T. cruzi</i> | 42  | 1    | 42   |
| Tc00.1047053509513.5   | <i>T. cruzi</i> | 151 | 37   | 187  |
| Tc00.1047053509537.20  | <i>T. cruzi</i> | 213 | 309  | 521  |
| Tc00.1047053509537.40  | <i>T. cruzi</i> | 231 | 84   | 314  |
| Tc00.1047053509537.50  | <i>T. cruzi</i> | 45  | 942  | 986  |
| Tc00.1047053509537.50  | <i>T. cruzi</i> | 60  | 1311 | 1370 |
| Tc00.1047053509537.50  | <i>T. cruzi</i> | 49  | 2349 | 2397 |
| Tc00.1047053509537.70  | <i>T. cruzi</i> | 96  | 24   | 119  |
| Tc00.1047053509537.80  | <i>T. cruzi</i> | 138 | 38   | 175  |
| Tc00.1047053509537.90  | <i>T. cruzi</i> | 49  | 321  | 369  |
| Tc00.1047053509543.10  | <i>T. cruzi</i> | 69  | 109  | 177  |
| Tc00.1047053509543.20  | <i>T. cruzi</i> | 80  | 192  | 271  |
| Tc00.1047053509543.20  | <i>T. cruzi</i> | 45  | 445  | 489  |
| Tc00.1047053509543.20  | <i>T. cruzi</i> | 45  | 445  | 489  |
| Tc00.1047053509543.30  | <i>T. cruzi</i> | 132 | 65   | 196  |
| Tc00.1047053509543.30  | <i>T. cruzi</i> | 42  | 274  | 315  |
| Tc00.1047053509543.30  | <i>T. cruzi</i> | 42  | 274  | 315  |
| Tc00.1047053509543.40  | <i>T. cruzi</i> | 40  | 461  | 500  |
| Tc00.1047053509543.40  | <i>T. cruzi</i> | 152 | 529  | 680  |
| Tc00.1047053509551.100 | <i>T. cruzi</i> | 51  | 1    | 51   |
| Tc00.1047053509551.100 | <i>T. cruzi</i> | 43  | 105  | 147  |
| Tc00.1047053509551.100 | <i>T. cruzi</i> | 43  | 105  | 147  |
| Tc00.1047053509551.110 | <i>T. cruzi</i> | 78  | 394  | 471  |
| Tc00.1047053509551.130 | <i>T. cruzi</i> | 45  | 374  | 418  |
| Tc00.1047053509551.40  | <i>T. cruzi</i> | 44  | 29   | 72   |
| Tc00.1047053509551.50  | <i>T. cruzi</i> | 46  | 68   | 113  |
| Tc00.1047053509551.60  | <i>T. cruzi</i> | 49  | 1    | 49   |

|                        |                 |     |      |      |
|------------------------|-----------------|-----|------|------|
| Tc00.1047053509551.60  | <i>T. cruzi</i> | 122 | 85   | 206  |
| Tc00.1047053509551.70  | <i>T. cruzi</i> | 70  | 112  | 181  |
| Tc00.1047053509551.90  | <i>T. cruzi</i> | 83  | 633  | 715  |
| Tc00.1047053509581.10  | <i>T. cruzi</i> | 88  | 57   | 144  |
| Tc00.1047053509581.10  | <i>T. cruzi</i> | 298 | 809  | 1106 |
| Tc00.1047053509581.5   | <i>T. cruzi</i> | 74  | 1    | 74   |
| Tc00.1047053509581.5   | <i>T. cruzi</i> | 62  | 161  | 222  |
| Tc00.1047053509581.5   | <i>T. cruzi</i> | 62  | 161  | 222  |
| Tc00.1047053509589.30  | <i>T. cruzi</i> | 137 | 63   | 199  |
| Tc00.1047053509589.30  | <i>T. cruzi</i> | 155 | 501  | 655  |
| Tc00.1047053509589.40  | <i>T. cruzi</i> | 49  | 1    | 49   |
| Tc00.1047053509589.40  | <i>T. cruzi</i> | 45  | 327  | 371  |
| Tc00.1047053509589.40  | <i>T. cruzi</i> | 127 | 440  | 566  |
| Tc00.1047053509589.40  | <i>T. cruzi</i> | 125 | 648  | 772  |
| Tc00.1047053509589.40  | <i>T. cruzi</i> | 222 | 804  | 1025 |
| Tc00.1047053509589.40  | <i>T. cruzi</i> | 64  | 1100 | 1163 |
| Tc00.1047053509589.40  | <i>T. cruzi</i> | 57  | 1208 | 1264 |
| Tc00.1047053509589.50  | <i>T. cruzi</i> | 686 | 1    | 686  |
| Tc00.1047053509591.20  | <i>T. cruzi</i> | 106 | 1    | 106  |
| Tc00.1047053509591.20  | <i>T. cruzi</i> | 41  | 394  | 434  |
| Tc00.1047053509591.20  | <i>T. cruzi</i> | 41  | 394  | 434  |
| Tc00.1047053509591.40  | <i>T. cruzi</i> | 106 | 669  | 774  |
| Tc00.1047053509591.40  | <i>T. cruzi</i> | 116 | 809  | 924  |
| Tc00.1047053509591.40  | <i>T. cruzi</i> | 65  | 964  | 1028 |
| Tc00.1047053509591.50  | <i>T. cruzi</i> | 70  | 144  | 213  |
| Tc00.1047053509595.20  | <i>T. cruzi</i> | 46  | 1    | 46   |
| Tc00.1047053509595.20  | <i>T. cruzi</i> | 94  | 244  | 337  |
| Tc00.1047053509595.20  | <i>T. cruzi</i> | 42  | 380  | 421  |
| Tc00.1047053509595.50  | <i>T. cruzi</i> | 53  | 102  | 154  |
| Tc00.1047053509595.50  | <i>T. cruzi</i> | 40  | 556  | 595  |
| Tc00.1047053509595.50  | <i>T. cruzi</i> | 49  | 783  | 831  |
| Tc00.1047053509595.60  | <i>T. cruzi</i> | 76  | 33   | 108  |
| Tc00.1047053509595.60  | <i>T. cruzi</i> | 62  | 221  | 282  |
| Tc00.1047053509595.70  | <i>T. cruzi</i> | 213 | 168  | 380  |
| Tc00.1047053509595.70  | <i>T. cruzi</i> | 45  | 398  | 442  |
| Tc00.1047053509595.70  | <i>T. cruzi</i> | 91  | 477  | 567  |
| Tc00.1047053509597.20  | <i>T. cruzi</i> | 274 | 312  | 585  |
| Tc00.1047053509597.29  | <i>T. cruzi</i> | 70  | 1    | 70   |
| Tc00.1047053509597.29  | <i>T. cruzi</i> | 45  | 148  | 192  |
| Tc00.1047053509597.29  | <i>T. cruzi</i> | 45  | 148  | 192  |
| Tc00.1047053509599.110 | <i>T. cruzi</i> | 83  | 213  | 295  |
| Tc00.1047053509599.110 | <i>T. cruzi</i> | 81  | 676  | 756  |
| Tc00.1047053509599.120 | <i>T. cruzi</i> | 81  | 68   | 148  |
| Tc00.1047053509599.157 | <i>T. cruzi</i> | 53  | 100  | 152  |
| Tc00.1047053509599.164 | <i>T. cruzi</i> | 77  | 204  | 280  |
| Tc00.1047053509599.170 | <i>T. cruzi</i> | 50  | 251  | 300  |
| Tc00.1047053509599.180 | <i>T. cruzi</i> | 360 | 1    | 360  |

|                        |                 |     |      |      |
|------------------------|-----------------|-----|------|------|
| Tc00.1047053509599.180 | <i>T. cruzi</i> | 72  | 362  | 433  |
| Tc00.1047053509599.20  | <i>T. cruzi</i> | 46  | 1996 | 2041 |
| Tc00.1047053509599.50  | <i>T. cruzi</i> | 503 | 1    | 503  |
| Tc00.1047053509599.60  | <i>T. cruzi</i> | 279 | 1    | 279  |
| Tc00.1047053509599.60  | <i>T. cruzi</i> | 206 | 311  | 516  |
| Tc00.1047053509599.70  | <i>T. cruzi</i> | 74  | 440  | 513  |
| Tc00.1047053509599.70  | <i>T. cruzi</i> | 71  | 593  | 663  |
| Tc00.1047053509599.70  | <i>T. cruzi</i> | 41  | 680  | 720  |
| Tc00.1047053509599.80  | <i>T. cruzi</i> | 88  | 104  | 191  |
| Tc00.1047053509599.80  | <i>T. cruzi</i> | 41  | 211  | 251  |
| Tc00.1047053509599.80  | <i>T. cruzi</i> | 45  | 381  | 425  |
| Tc00.1047053509599.90  | <i>T. cruzi</i> | 634 | 1    | 634  |
| Tc00.1047053509599.90  | <i>T. cruzi</i> | 95  | 660  | 754  |
| Tc00.1047053509625.20  | <i>T. cruzi</i> | 42  | 98   | 139  |
| Tc00.1047053509625.30  | <i>T. cruzi</i> | 182 | 1    | 182  |
| Tc00.1047053509625.30  | <i>T. cruzi</i> | 69  | 197  | 265  |
| Tc00.1047053509631.140 | <i>T. cruzi</i> | 67  | 67   | 133  |
| Tc00.1047053509631.140 | <i>T. cruzi</i> | 67  | 573  | 639  |
| Tc00.1047053509631.140 | <i>T. cruzi</i> | 800 | 671  | 1470 |
| Tc00.1047053509631.160 | <i>T. cruzi</i> | 142 | 153  | 294  |
| Tc00.1047053509631.20  | <i>T. cruzi</i> | 332 | 71   | 402  |
| Tc00.1047053509631.60  | <i>T. cruzi</i> | 42  | 427  | 468  |
| Tc00.1047053509631.60  | <i>T. cruzi</i> | 51  | 1616 | 1666 |
| Tc00.1047053509631.60  | <i>T. cruzi</i> | 62  | 2866 | 2927 |
| Tc00.1047053509631.60  | <i>T. cruzi</i> | 82  | 3396 | 3477 |
| Tc00.1047053509631.80  | <i>T. cruzi</i> | 379 | 28   | 406  |
| Tc00.1047053509631.90  | <i>T. cruzi</i> | 163 | 28   | 190  |
| Tc00.1047053509633.40  | <i>T. cruzi</i> | 77  | 51   | 127  |
| Tc00.1047053509649.30  | <i>T. cruzi</i> | 76  | 1    | 76   |
| Tc00.1047053509649.30  | <i>T. cruzi</i> | 40  | 367  | 406  |
| Tc00.1047053509649.50  | <i>T. cruzi</i> | 153 | 1    | 153  |
| Tc00.1047053509649.50  | <i>T. cruzi</i> | 262 | 159  | 420  |
| Tc00.1047053509651.10  | <i>T. cruzi</i> | 252 | 1    | 252  |
| Tc00.1047053509651.10  | <i>T. cruzi</i> | 103 | 287  | 389  |
| Tc00.1047053509669.110 | <i>T. cruzi</i> | 98  | 1    | 98   |
| Tc00.1047053509669.110 | <i>T. cruzi</i> | 100 | 386  | 485  |
| Tc00.1047053509669.110 | <i>T. cruzi</i> | 54  | 509  | 562  |
| Tc00.1047053509669.14  | <i>T. cruzi</i> | 62  | 89   | 150  |
| Tc00.1047053509669.150 | <i>T. cruzi</i> | 48  | 201  | 248  |
| Tc00.1047053509669.160 | <i>T. cruzi</i> | 41  | 288  | 328  |
| Tc00.1047053509669.20  | <i>T. cruzi</i> | 68  | 857  | 924  |
| Tc00.1047053509669.30  | <i>T. cruzi</i> | 53  | 1    | 53   |
| Tc00.1047053509669.40  | <i>T. cruzi</i> | 73  | 1    | 73   |
| Tc00.1047053509669.40  | <i>T. cruzi</i> | 48  | 261  | 308  |
| Tc00.1047053509669.50  | <i>T. cruzi</i> | 49  | 50   | 98   |
| Tc00.1047053509669.50  | <i>T. cruzi</i> | 40  | 107  | 146  |
| Tc00.1047053509669.50  | <i>T. cruzi</i> | 56  | 192  | 247  |

|                        |                 |     |      |      |
|------------------------|-----------------|-----|------|------|
| Tc00.1047053509669.50  | <i>T. cruzi</i> | 82  | 793  | 874  |
| Tc00.1047053509669.50  | <i>T. cruzi</i> | 52  | 988  | 1039 |
| Tc00.1047053509669.50  | <i>T. cruzi</i> | 57  | 1580 | 1636 |
| Tc00.1047053509669.60  | <i>T. cruzi</i> | 63  | 183  | 245  |
| Tc00.1047053509669.75  | <i>T. cruzi</i> | 46  | 1    | 46   |
| Tc00.1047053509669.75  | <i>T. cruzi</i> | 79  | 210  | 288  |
| Tc00.1047053509669.80  | <i>T. cruzi</i> | 84  | 1    | 84   |
| Tc00.1047053509669.90  | <i>T. cruzi</i> | 132 | 77   | 208  |
| Tc00.1047053509669.90  | <i>T. cruzi</i> | 86  | 221  | 306  |
| Tc00.1047053509699.110 | <i>T. cruzi</i> | 244 | 28   | 271  |
| Tc00.1047053509699.150 | <i>T. cruzi</i> | 175 | 22   | 196  |
| Tc00.1047053509699.170 | <i>T. cruzi</i> | 185 | 1    | 185  |
| Tc00.1047053509699.200 | <i>T. cruzi</i> | 180 | 1    | 180  |
| Tc00.1047053509699.210 | <i>T. cruzi</i> | 162 | 75   | 236  |
| Tc00.1047053509699.240 | <i>T. cruzi</i> | 45  | 30   | 74   |
| Tc00.1047053509699.240 | <i>T. cruzi</i> | 59  | 167  | 225  |
| Tc00.1047053509699.250 | <i>T. cruzi</i> | 67  | 22   | 88   |
| Tc00.1047053509699.40  | <i>T. cruzi</i> | 52  | 1    | 52   |
| Tc00.1047053509699.40  | <i>T. cruzi</i> | 64  | 131  | 194  |
| Tc00.1047053509699.40  | <i>T. cruzi</i> | 60  | 302  | 361  |
| Tc00.1047053509699.40  | <i>T. cruzi</i> | 49  | 428  | 476  |
| Tc00.1047053509699.40  | <i>T. cruzi</i> | 143 | 742  | 884  |
| Tc00.1047053509703.10  | <i>T. cruzi</i> | 729 | 1    | 729  |
| Tc00.1047053509703.10  | <i>T. cruzi</i> | 42  | 760  | 801  |
| Tc00.1047053509703.10  | <i>T. cruzi</i> | 80  | 820  | 899  |
| Tc00.1047053509705.10  | <i>T. cruzi</i> | 590 | 1    | 590  |
| Tc00.1047053509705.10  | <i>T. cruzi</i> | 119 | 621  | 739  |
| Tc00.1047053509707.20  | <i>T. cruzi</i> | 62  | 144  | 205  |
| Tc00.1047053509735.120 | <i>T. cruzi</i> | 74  | 1    | 74   |
| Tc00.1047053509735.120 | <i>T. cruzi</i> | 40  | 314  | 353  |
| Tc00.1047053509735.84  | <i>T. cruzi</i> | 45  | 225  | 269  |
| Tc00.1047053509735.84  | <i>T. cruzi</i> | 45  | 411  | 455  |
| Tc00.1047053509735.84  | <i>T. cruzi</i> | 52  | 1599 | 1650 |
| Tc00.1047053509735.84  | <i>T. cruzi</i> | 73  | 2836 | 2908 |
| Tc00.1047053509735.84  | <i>T. cruzi</i> | 84  | 3376 | 3459 |
| Tc00.1047053509737.9   | <i>T. cruzi</i> | 43  | 1    | 43   |
| Tc00.1047053509737.9   | <i>T. cruzi</i> | 46  | 65   | 110  |
| Tc00.1047053509737.9   | <i>T. cruzi</i> | 43  | 246  | 288  |
| Tc00.1047053509739.10  | <i>T. cruzi</i> | 40  | 1    | 40   |
| Tc00.1047053509739.10  | <i>T. cruzi</i> | 60  | 68   | 127  |
| Tc00.1047053509739.10  | <i>T. cruzi</i> | 43  | 244  | 286  |
| Tc00.1047053509739.10  | <i>T. cruzi</i> | 95  | 712  | 806  |
| Tc00.1047053509757.30  | <i>T. cruzi</i> | 64  | 82   | 145  |
| Tc00.1047053509757.40  | <i>T. cruzi</i> | 59  | 1    | 59   |
| Tc00.1047053509757.40  | <i>T. cruzi</i> | 71  | 96   | 166  |
| Tc00.1047053509757.40  | <i>T. cruzi</i> | 99  | 176  | 274  |
| Tc00.1047053509759.19  | <i>T. cruzi</i> | 98  | 17   | 114  |

|                        |                 |     |      |      |
|------------------------|-----------------|-----|------|------|
| Tc00.1047053509765.129 | <i>T. cruzi</i> | 48  | 1    | 48   |
| Tc00.1047053509765.129 | <i>T. cruzi</i> | 46  | 700  | 745  |
| Tc00.1047053509765.50  | <i>T. cruzi</i> | 48  | 1    | 48   |
| Tc00.1047053509765.50  | <i>T. cruzi</i> | 296 | 707  | 1002 |
| Tc00.1047053509767.10  | <i>T. cruzi</i> | 46  | 1    | 46   |
| Tc00.1047053509767.10  | <i>T. cruzi</i> | 44  | 82   | 125  |
| Tc00.1047053509767.10  | <i>T. cruzi</i> | 76  | 732  | 807  |
| Tc00.1047053509767.100 | <i>T. cruzi</i> | 83  | 141  | 223  |
| Tc00.1047053509767.120 | <i>T. cruzi</i> | 80  | 199  | 278  |
| Tc00.1047053509767.150 | <i>T. cruzi</i> | 436 | 54   | 489  |
| Tc00.1047053509767.160 | <i>T. cruzi</i> | 53  | 1    | 53   |
| Tc00.1047053509767.200 | <i>T. cruzi</i> | 51  | 307  | 357  |
| Tc00.1047053509767.210 | <i>T. cruzi</i> | 129 | 78   | 206  |
| Tc00.1047053509767.215 | <i>T. cruzi</i> | 94  | 1    | 94   |
| Tc00.1047053509767.215 | <i>T. cruzi</i> | 80  | 105  | 184  |
| Tc00.1047053509767.220 | <i>T. cruzi</i> | 85  | 1    | 85   |
| Tc00.1047053509767.220 | <i>T. cruzi</i> | 61  | 105  | 165  |
| Tc00.1047053509767.230 | <i>T. cruzi</i> | 44  | 102  | 145  |
| Tc00.1047053509767.240 | <i>T. cruzi</i> | 140 | 1    | 140  |
| Tc00.1047053509767.30  | <i>T. cruzi</i> | 96  | 87   | 182  |
| Tc00.1047053509767.50  | <i>T. cruzi</i> | 99  | 1    | 99   |
| Tc00.1047053509767.59  | <i>T. cruzi</i> | 40  | 35   | 74   |
| Tc00.1047053509767.70  | <i>T. cruzi</i> | 72  | 73   | 144  |
| Tc00.1047053509767.80  | <i>T. cruzi</i> | 64  | 389  | 452  |
| Tc00.1047053509769.100 | <i>T. cruzi</i> | 113 | 1    | 113  |
| Tc00.1047053509769.100 | <i>T. cruzi</i> | 158 | 264  | 421  |
| Tc00.1047053509769.110 | <i>T. cruzi</i> | 95  | 1    | 95   |
| Tc00.1047053509769.120 | <i>T. cruzi</i> | 87  | 49   | 135  |
| Tc00.1047053509769.120 | <i>T. cruzi</i> | 63  | 172  | 234  |
| Tc00.1047053509769.120 | <i>T. cruzi</i> | 63  | 172  | 234  |
| Tc00.1047053509769.130 | <i>T. cruzi</i> | 137 | 354  | 490  |
| Tc00.1047053509769.130 | <i>T. cruzi</i> | 126 | 650  | 775  |
| Tc00.1047053509769.130 | <i>T. cruzi</i> | 69  | 830  | 898  |
| Tc00.1047053509769.130 | <i>T. cruzi</i> | 87  | 1031 | 1117 |
| Tc00.1047053509769.30  | <i>T. cruzi</i> | 202 | 1    | 202  |
| Tc00.1047053509769.30  | <i>T. cruzi</i> | 68  | 222  | 289  |
| Tc00.1047053509769.4   | <i>T. cruzi</i> | 56  | 97   | 152  |
| Tc00.1047053509769.40  | <i>T. cruzi</i> | 319 | 80   | 398  |
| Tc00.1047053509769.70  | <i>T. cruzi</i> | 189 | 3    | 191  |
| Tc00.1047053509769.70  | <i>T. cruzi</i> | 41  | 584  | 624  |
| Tc00.1047053509769.70  | <i>T. cruzi</i> | 44  | 682  | 725  |
| Tc00.1047053509769.80  | <i>T. cruzi</i> | 71  | 329  | 399  |
| Tc00.1047053509773.9   | <i>T. cruzi</i> | 136 | 1    | 136  |
| Tc00.1047053509773.9   | <i>T. cruzi</i> | 68  | 173  | 240  |
| Tc00.1047053509775.20  | <i>T. cruzi</i> | 111 | 1    | 111  |
| Tc00.1047053509775.20  | <i>T. cruzi</i> | 202 | 115  | 316  |
| Tc00.1047053509775.20  | <i>T. cruzi</i> | 41  | 817  | 857  |



|                        |                 |     |      |      |
|------------------------|-----------------|-----|------|------|
| Tc00.1047053509775.20  | <i>T. cruzi</i> | 73  | 1108 | 1180 |
| Tc00.1047053509775.30  | <i>T. cruzi</i> | 60  | 153  | 212  |
| Tc00.1047053509775.30  | <i>T. cruzi</i> | 46  | 499  | 544  |
| Tc00.1047053509775.30  | <i>T. cruzi</i> | 44  | 603  | 646  |
| Tc00.1047053509775.30  | <i>T. cruzi</i> | 55  | 966  | 1020 |
| Tc00.1047053509775.30  | <i>T. cruzi</i> | 49  | 4474 | 4522 |
| Tc00.1047053509775.9   | <i>T. cruzi</i> | 214 | 1    | 214  |
| Tc00.1047053509777.10  | <i>T. cruzi</i> | 63  | 145  | 207  |
| Tc00.1047053509777.10  | <i>T. cruzi</i> | 70  | 314  | 383  |
| Tc00.1047053509777.10  | <i>T. cruzi</i> | 70  | 314  | 383  |
| Tc00.1047053509777.100 | <i>T. cruzi</i> | 44  | 601  | 644  |
| Tc00.1047053509777.100 | <i>T. cruzi</i> | 75  | 780  | 854  |
| Tc00.1047053509777.110 | <i>T. cruzi</i> | 60  | 1    | 60   |
| Tc00.1047053509777.30  | <i>T. cruzi</i> | 45  | 1    | 45   |
| Tc00.1047053509777.40  | <i>T. cruzi</i> | 49  | 163  | 211  |
| Tc00.1047053509777.60  | <i>T. cruzi</i> | 117 | 1    | 117  |
| Tc00.1047053509777.60  | <i>T. cruzi</i> | 459 | 165  | 623  |
| Tc00.1047053509777.64  | <i>T. cruzi</i> | 55  | 67   | 121  |
| Tc00.1047053509777.70  | <i>T. cruzi</i> | 50  | 1    | 50   |
| Tc00.1047053509779.10  | <i>T. cruzi</i> | 53  | 278  | 330  |
| Tc00.1047053509779.10  | <i>T. cruzi</i> | 45  | 614  | 658  |
| Tc00.1047053509779.10  | <i>T. cruzi</i> | 86  | 662  | 747  |
| Tc00.1047053509779.10  | <i>T. cruzi</i> | 40  | 813  | 852  |
| Tc00.1047053509779.30  | <i>T. cruzi</i> | 132 | 145  | 276  |
| Tc00.1047053509779.30  | <i>T. cruzi</i> | 508 | 290  | 797  |
| Tc00.1047053509779.4   | <i>T. cruzi</i> | 55  | 239  | 293  |
| Tc00.1047053509779.50  | <i>T. cruzi</i> | 57  | 1    | 57   |
| Tc00.1047053509779.50  | <i>T. cruzi</i> | 101 | 106  | 206  |
| Tc00.1047053509779.50  | <i>T. cruzi</i> | 157 | 286  | 442  |
| Tc00.1047053509801.20  | <i>T. cruzi</i> | 126 | 1    | 126  |
| Tc00.1047053509801.20  | <i>T. cruzi</i> | 72  | 383  | 454  |
| Tc00.1047053509803.10  | <i>T. cruzi</i> | 151 | 1    | 151  |
| Tc00.1047053509803.10  | <i>T. cruzi</i> | 64  | 295  | 358  |
| Tc00.1047053509803.50  | <i>T. cruzi</i> | 77  | 526  | 602  |
| Tc00.1047053509803.50  | <i>T. cruzi</i> | 49  | 1196 | 1244 |
| Tc00.1047053509803.50  | <i>T. cruzi</i> | 49  | 1196 | 1244 |
| Tc00.1047053509805.100 | <i>T. cruzi</i> | 197 | 83   | 279  |
| Tc00.1047053509805.100 | <i>T. cruzi</i> | 91  | 311  | 401  |
| Tc00.1047053509805.100 | <i>T. cruzi</i> | 305 | 434  | 738  |
| Tc00.1047053509805.100 | <i>T. cruzi</i> | 100 | 847  | 946  |
| Tc00.1047053509805.100 | <i>T. cruzi</i> | 136 | 985  | 1120 |
| Tc00.1047053509805.100 | <i>T. cruzi</i> | 97  | 1131 | 1227 |
| Tc00.1047053509805.110 | <i>T. cruzi</i> | 48  | 29   | 76   |
| Tc00.1047053509805.120 | <i>T. cruzi</i> | 87  | 45   | 131  |
| Tc00.1047053509805.130 | <i>T. cruzi</i> | 40  | 254  | 293  |
| Tc00.1047053509805.130 | <i>T. cruzi</i> | 54  | 733  | 786  |
| Tc00.1047053509805.130 | <i>T. cruzi</i> | 54  | 733  | 786  |

|                        |                 |     |      |      |
|------------------------|-----------------|-----|------|------|
| Tc00.1047053509805.140 | <i>T. cruzi</i> | 151 | 25   | 175  |
| Tc00.1047053509805.140 | <i>T. cruzi</i> | 131 | 209  | 339  |
| Tc00.1047053509805.140 | <i>T. cruzi</i> | 140 | 359  | 498  |
| Tc00.1047053509805.140 | <i>T. cruzi</i> | 52  | 1261 | 1312 |
| Tc00.1047053509805.160 | <i>T. cruzi</i> | 57  | 37   | 93   |
| Tc00.1047053509805.160 | <i>T. cruzi</i> | 115 | 578  | 692  |
| Tc00.1047053509805.160 | <i>T. cruzi</i> | 149 | 736  | 884  |
| Tc00.1047053509805.160 | <i>T. cruzi</i> | 82  | 905  | 986  |
| Tc00.1047053509805.160 | <i>T. cruzi</i> | 53  | 1007 | 1059 |
| Tc00.1047053509805.160 | <i>T. cruzi</i> | 90  | 1062 | 1151 |
| Tc00.1047053509805.170 | <i>T. cruzi</i> | 71  | 1    | 71   |
| Tc00.1047053509805.170 | <i>T. cruzi</i> | 86  | 94   | 179  |
| Tc00.1047053509805.170 | <i>T. cruzi</i> | 81  | 235  | 315  |
| Tc00.1047053509805.170 | <i>T. cruzi</i> | 271 | 411  | 681  |
| Tc00.1047053509805.180 | <i>T. cruzi</i> | 98  | 128  | 225  |
| Tc00.1047053509805.180 | <i>T. cruzi</i> | 47  | 267  | 313  |
| Tc00.1047053509805.210 | <i>T. cruzi</i> | 97  | 37   | 133  |
| Tc00.1047053509805.230 | <i>T. cruzi</i> | 61  | 147  | 207  |
| Tc00.1047053509805.230 | <i>T. cruzi</i> | 64  | 218  | 281  |
| Tc00.1047053509805.230 | <i>T. cruzi</i> | 45  | 445  | 489  |
| Tc00.1047053509805.40  | <i>T. cruzi</i> | 47  | 686  | 732  |
| Tc00.1047053509805.50  | <i>T. cruzi</i> | 60  | 126  | 185  |
| Tc00.1047053509805.70  | <i>T. cruzi</i> | 991 | 1    | 991  |
| Tc00.1047053509805.80  | <i>T. cruzi</i> | 110 | 1    | 110  |
| Tc00.1047053509805.80  | <i>T. cruzi</i> | 46  | 154  | 199  |
| Tc00.1047053509805.90  | <i>T. cruzi</i> | 44  | 165  | 208  |
| Tc00.1047053509807.20  | <i>T. cruzi</i> | 259 | 1    | 259  |
| Tc00.1047053509807.20  | <i>T. cruzi</i> | 89  | 306  | 394  |
| Tc00.1047053509809.30  | <i>T. cruzi</i> | 40  | 1    | 40   |
| Tc00.1047053509809.30  | <i>T. cruzi</i> | 55  | 67   | 121  |
| Tc00.1047053509809.30  | <i>T. cruzi</i> | 73  | 189  | 261  |
| Tc00.1047053509809.30  | <i>T. cruzi</i> | 108 | 348  | 455  |
| Tc00.1047053509809.39  | <i>T. cruzi</i> | 67  | 1    | 67   |
| Tc00.1047053509815.10  | <i>T. cruzi</i> | 59  | 1    | 59   |
| Tc00.1047053509815.50  | <i>T. cruzi</i> | 51  | 105  | 155  |
| Tc00.1047053509817.21  | <i>T. cruzi</i> | 49  | 225  | 273  |
| Tc00.1047053509817.50  | <i>T. cruzi</i> | 42  | 653  | 694  |
| Tc00.1047053509819.10  | <i>T. cruzi</i> | 57  | 1103 | 1159 |
| Tc00.1047053509819.10  | <i>T. cruzi</i> | 40  | 1718 | 1757 |
| Tc00.1047053509819.10  | <i>T. cruzi</i> | 40  | 1718 | 1757 |
| Tc00.1047053509819.20  | <i>T. cruzi</i> | 55  | 298  | 352  |
| Tc00.1047053509819.20  | <i>T. cruzi</i> | 41  | 429  | 469  |
| Tc00.1047053509819.20  | <i>T. cruzi</i> | 191 | 645  | 835  |
| Tc00.1047053509819.30  | <i>T. cruzi</i> | 40  | 59   | 98   |
| Tc00.1047053509819.40  | <i>T. cruzi</i> | 59  | 694  | 752  |
| Tc00.1047053509819.40  | <i>T. cruzi</i> | 70  | 791  | 860  |
| Tc00.1047053509819.40  | <i>T. cruzi</i> | 70  | 791  | 860  |

|                       |                 |     |      |      |
|-----------------------|-----------------|-----|------|------|
| Tc00.1047053509819.49 | <i>T. cruzi</i> | 46  | 190  | 235  |
| Tc00.1047053509819.49 | <i>T. cruzi</i> | 69  | 367  | 435  |
| Tc00.1047053509823.10 | <i>T. cruzi</i> | 78  | 56   | 133  |
| Tc00.1047053509823.10 | <i>T. cruzi</i> | 86  | 210  | 295  |
| Tc00.1047053509823.4  | <i>T. cruzi</i> | 151 | 513  | 663  |
| Tc00.1047053509825.20 | <i>T. cruzi</i> | 52  | 22   | 73   |
| Tc00.1047053509825.20 | <i>T. cruzi</i> | 541 | 89   | 629  |
| Tc00.1047053509825.20 | <i>T. cruzi</i> | 83  | 722  | 804  |
| Tc00.1047053509825.20 | <i>T. cruzi</i> | 86  | 814  | 899  |
| Tc00.1047053509825.30 | <i>T. cruzi</i> | 55  | 77   | 131  |
| Tc00.1047053509825.30 | <i>T. cruzi</i> | 194 | 150  | 343  |
| Tc00.1047053509825.30 | <i>T. cruzi</i> | 194 | 150  | 343  |
| Tc00.1047053509825.7  | <i>T. cruzi</i> | 43  | 257  | 299  |
| Tc00.1047053509827.4  | <i>T. cruzi</i> | 58  | 1    | 58   |
| Tc00.1047053509829.9  | <i>T. cruzi</i> | 40  | 1    | 40   |
| Tc00.1047053509829.9  | <i>T. cruzi</i> | 41  | 161  | 201  |
| Tc00.1047053509829.9  | <i>T. cruzi</i> | 41  | 161  | 201  |
| Tc00.1047053509831.10 | <i>T. cruzi</i> | 62  | 1    | 62   |
| Tc00.1047053509831.20 | <i>T. cruzi</i> | 41  | 55   | 95   |
| Tc00.1047053509831.33 | <i>T. cruzi</i> | 71  | 252  | 322  |
| Tc00.1047053509831.33 | <i>T. cruzi</i> | 222 | 331  | 552  |
| Tc00.1047053509831.40 | <i>T. cruzi</i> | 72  | 142  | 213  |
| Tc00.1047053509831.5  | <i>T. cruzi</i> | 77  | 1    | 77   |
| Tc00.1047053509835.10 | <i>T. cruzi</i> | 134 | 21   | 154  |
| Tc00.1047053509835.10 | <i>T. cruzi</i> | 109 | 216  | 324  |
| Tc00.1047053509835.20 | <i>T. cruzi</i> | 209 | 1    | 209  |
| Tc00.1047053509835.20 | <i>T. cruzi</i> | 54  | 306  | 359  |
| Tc00.1047053509835.20 | <i>T. cruzi</i> | 52  | 514  | 565  |
| Tc00.1047053509835.30 | <i>T. cruzi</i> | 155 | 346  | 500  |
| Tc00.1047053509837.10 | <i>T. cruzi</i> | 60  | 1    | 60   |
| Tc00.1047053509837.10 | <i>T. cruzi</i> | 248 | 157  | 404  |
| Tc00.1047053509837.10 | <i>T. cruzi</i> | 248 | 157  | 404  |
| Tc00.1047053509837.20 | <i>T. cruzi</i> | 41  | 1    | 41   |
| Tc00.1047053509837.20 | <i>T. cruzi</i> | 94  | 184  | 277  |
| Tc00.1047053509837.20 | <i>T. cruzi</i> | 113 | 384  | 496  |
| Tc00.1047053509837.40 | <i>T. cruzi</i> | 68  | 1    | 68   |
| Tc00.1047053509843.20 | <i>T. cruzi</i> | 87  | 1    | 87   |
| Tc00.1047053509843.20 | <i>T. cruzi</i> | 116 | 757  | 872  |
| Tc00.1047053509847.70 | <i>T. cruzi</i> | 94  | 13   | 106  |
| Tc00.1047053509871.80 | <i>T. cruzi</i> | 45  | 221  | 265  |
| Tc00.1047053509871.80 | <i>T. cruzi</i> | 55  | 1594 | 1648 |
| Tc00.1047053509871.80 | <i>T. cruzi</i> | 97  | 2834 | 2930 |
| Tc00.1047053509871.80 | <i>T. cruzi</i> | 65  | 3406 | 3470 |
| Tc00.1047053509883.9  | <i>T. cruzi</i> | 48  | 247  | 294  |
| Tc00.1047053509885.20 | <i>T. cruzi</i> | 66  | 138  | 203  |
| Tc00.1047053509885.20 | <i>T. cruzi</i> | 40  | 607  | 646  |
| Tc00.1047053509885.20 | <i>T. cruzi</i> | 40  | 607  | 646  |

|                        |                 |     |      |      |
|------------------------|-----------------|-----|------|------|
| Tc00.1047053509885.30  | <i>T. cruzi</i> | 79  | 1    | 79   |
| Tc00.1047053509885.30  | <i>T. cruzi</i> | 70  | 241  | 310  |
| Tc00.1047053509885.30  | <i>T. cruzi</i> | 70  | 241  | 310  |
| Tc00.1047053509885.40  | <i>T. cruzi</i> | 69  | 1    | 69   |
| Tc00.1047053509885.50  | <i>T. cruzi</i> | 43  | 1    | 43   |
| Tc00.1047053509885.50  | <i>T. cruzi</i> | 137 | 167  | 303  |
| Tc00.1047053509885.50  | <i>T. cruzi</i> | 41  | 513  | 553  |
| Tc00.1047053509885.50  | <i>T. cruzi</i> | 104 | 874  | 977  |
| Tc00.1047053509885.60  | <i>T. cruzi</i> | 47  | 353  | 399  |
| Tc00.1047053509885.60  | <i>T. cruzi</i> | 124 | 463  | 586  |
| Tc00.1047053509885.70  | <i>T. cruzi</i> | 53  | 197  | 249  |
| Tc00.1047053509887.19  | <i>T. cruzi</i> | 42  | 246  | 287  |
| Tc00.1047053509891.60  | <i>T. cruzi</i> | 68  | 202  | 269  |
| Tc00.1047053509891.60  | <i>T. cruzi</i> | 49  | 404  | 452  |
| Tc00.1047053509891.60  | <i>T. cruzi</i> | 49  | 404  | 452  |
| Tc00.1047053509893.10  | <i>T. cruzi</i> | 96  | 123  | 218  |
| Tc00.1047053509893.10  | <i>T. cruzi</i> | 40  | 243  | 282  |
| Tc00.1047053509893.10  | <i>T. cruzi</i> | 49  | 333  | 381  |
| Tc00.1047053509893.10  | <i>T. cruzi</i> | 46  | 386  | 431  |
| Tc00.1047053509893.10  | <i>T. cruzi</i> | 78  | 435  | 512  |
| Tc00.1047053509893.20  | <i>T. cruzi</i> | 180 | 62   | 241  |
| Tc00.1047053509893.20  | <i>T. cruzi</i> | 419 | 300  | 718  |
| Tc00.1047053509893.20  | <i>T. cruzi</i> | 79  | 739  | 817  |
| Tc00.1047053509893.20  | <i>T. cruzi</i> | 45  | 852  | 896  |
| Tc00.1047053509895.10  | <i>T. cruzi</i> | 147 | 25   | 171  |
| Tc00.1047053509895.10  | <i>T. cruzi</i> | 42  | 268  | 309  |
| Tc00.1047053509895.10  | <i>T. cruzi</i> | 68  | 446  | 513  |
| Tc00.1047053509895.100 | <i>T. cruzi</i> | 251 | 237  | 487  |
| Tc00.1047053509895.20  | <i>T. cruzi</i> | 116 | 1    | 116  |
| Tc00.1047053509895.20  | <i>T. cruzi</i> | 54  | 614  | 667  |
| Tc00.1047053509895.40  | <i>T. cruzi</i> | 86  | 1    | 86   |
| Tc00.1047053509895.40  | <i>T. cruzi</i> | 152 | 98   | 249  |
| Tc00.1047053509895.40  | <i>T. cruzi</i> | 47  | 260  | 306  |
| Tc00.1047053509895.40  | <i>T. cruzi</i> | 43  | 399  | 441  |
| Tc00.1047053509895.40  | <i>T. cruzi</i> | 79  | 991  | 1069 |
| Tc00.1047053509895.50  | <i>T. cruzi</i> | 405 | 1    | 405  |
| Tc00.1047053509895.50  | <i>T. cruzi</i> | 91  | 488  | 578  |
| Tc00.1047053509895.50  | <i>T. cruzi</i> | 49  | 691  | 739  |
| Tc00.1047053509895.60  | <i>T. cruzi</i> | 106 | 139  | 244  |
| Tc00.1047053509925.10  | <i>T. cruzi</i> | 324 | 54   | 377  |
| Tc00.1047053509925.20  | <i>T. cruzi</i> | 158 | 24   | 181  |
| Tc00.1047053509925.70  | <i>T. cruzi</i> | 52  | 1595 | 1646 |
| Tc00.1047053509925.70  | <i>T. cruzi</i> | 60  | 2830 | 2889 |
| Tc00.1047053509925.70  | <i>T. cruzi</i> | 68  | 3369 | 3436 |
| Tc00.1047053509927.10  | <i>T. cruzi</i> | 53  | 1    | 53   |
| Tc00.1047053509927.10  | <i>T. cruzi</i> | 42  | 63   | 104  |
| Tc00.1047053509951.30  | <i>T. cruzi</i> | 76  | 409  | 484  |

|                        |                 |     |     |     |
|------------------------|-----------------|-----|-----|-----|
| Tc00.1047053509951.40  | <i>T. cruzi</i> | 190 | 43  | 232 |
| Tc00.1047053509951.49  | <i>T. cruzi</i> | 41  | 80  | 120 |
| Tc00.1047053509953.9   | <i>T. cruzi</i> | 61  | 97  | 157 |
| Tc00.1047053509959.40  | <i>T. cruzi</i> | 52  | 108 | 159 |
| Tc00.1047053509965.110 | <i>T. cruzi</i> | 57  | 1   | 57  |
| Tc00.1047053509965.120 | <i>T. cruzi</i> | 49  | 1   | 49  |
| Tc00.1047053509965.150 | <i>T. cruzi</i> | 121 | 13  | 133 |
| Tc00.1047053509965.150 | <i>T. cruzi</i> | 45  | 211 | 255 |
| Tc00.1047053509965.150 | <i>T. cruzi</i> | 52  | 471 | 522 |
| Tc00.1047053509965.150 | <i>T. cruzi</i> | 53  | 563 | 615 |
| Tc00.1047053509965.160 | <i>T. cruzi</i> | 76  | 154 | 229 |
| Tc00.1047053509965.160 | <i>T. cruzi</i> | 109 | 339 | 447 |
| Tc00.1047053509965.170 | <i>T. cruzi</i> | 52  | 157 | 208 |
| Tc00.1047053509965.180 | <i>T. cruzi</i> | 184 | 1   | 184 |
| Tc00.1047053509965.180 | <i>T. cruzi</i> | 67  | 256 | 322 |
| Tc00.1047053509965.180 | <i>T. cruzi</i> | 99  | 469 | 567 |
| Tc00.1047053509965.20  | <i>T. cruzi</i> | 99  | 1   | 99  |
| Tc00.1047053509965.20  | <i>T. cruzi</i> | 49  | 391 | 439 |
| Tc00.1047053509965.20  | <i>T. cruzi</i> | 130 | 548 | 677 |
| Tc00.1047053509965.200 | <i>T. cruzi</i> | 66  | 1   | 66  |
| Tc00.1047053509965.210 | <i>T. cruzi</i> | 49  | 129 | 177 |
| Tc00.1047053509965.240 | <i>T. cruzi</i> | 44  | 164 | 207 |
| Tc00.1047053509965.240 | <i>T. cruzi</i> | 45  | 215 | 259 |
| Tc00.1047053509965.240 | <i>T. cruzi</i> | 43  | 412 | 454 |
| Tc00.1047053509965.250 | <i>T. cruzi</i> | 45  | 101 | 145 |
| Tc00.1047053509965.250 | <i>T. cruzi</i> | 74  | 695 | 768 |
| Tc00.1047053509965.260 | <i>T. cruzi</i> | 51  | 438 | 488 |
| Tc00.1047053509965.280 | <i>T. cruzi</i> | 50  | 259 | 308 |
| Tc00.1047053509965.290 | <i>T. cruzi</i> | 61  | 35  | 95  |
| Tc00.1047053509965.300 | <i>T. cruzi</i> | 61  | 1   | 61  |
| Tc00.1047053509965.319 | <i>T. cruzi</i> | 42  | 1   | 42  |
| Tc00.1047053509965.319 | <i>T. cruzi</i> | 65  | 619 | 683 |
| Tc00.1047053509965.319 | <i>T. cruzi</i> | 65  | 619 | 683 |
| Tc00.1047053509965.330 | <i>T. cruzi</i> | 50  | 86  | 135 |
| Tc00.1047053509965.330 | <i>T. cruzi</i> | 44  | 174 | 217 |
| Tc00.1047053509965.330 | <i>T. cruzi</i> | 55  | 302 | 356 |
| Tc00.1047053509965.340 | <i>T. cruzi</i> | 56  | 409 | 464 |
| Tc00.1047053509965.350 | <i>T. cruzi</i> | 58  | 1   | 58  |
| Tc00.1047053509965.360 | <i>T. cruzi</i> | 193 | 122 | 314 |
| Tc00.1047053509965.40  | <i>T. cruzi</i> | 44  | 404 | 447 |
| Tc00.1047053509965.40  | <i>T. cruzi</i> | 51  | 472 | 522 |
| Tc00.1047053509965.40  | <i>T. cruzi</i> | 81  | 610 | 690 |
| Tc00.1047053509965.400 | <i>T. cruzi</i> | 62  | 1   | 62  |
| Tc00.1047053509965.400 | <i>T. cruzi</i> | 53  | 88  | 140 |
| Tc00.1047053509965.400 | <i>T. cruzi</i> | 53  | 88  | 140 |
| Tc00.1047053509965.420 | <i>T. cruzi</i> | 47  | 1   | 47  |
| Tc00.1047053509965.420 | <i>T. cruzi</i> | 53  | 82  | 134 |

|                        |                 |     |      |      |
|------------------------|-----------------|-----|------|------|
| Tc00.1047053509965.420 | <i>T. cruzi</i> | 53  | 82   | 134  |
| Tc00.1047053509965.60  | <i>T. cruzi</i> | 41  | 217  | 257  |
| Tc00.1047053509965.70  | <i>T. cruzi</i> | 82  | 135  | 216  |
| Tc00.1047053509965.70  | <i>T. cruzi</i> | 86  | 963  | 1048 |
| Tc00.1047053509965.70  | <i>T. cruzi</i> | 86  | 963  | 1048 |
| Tc00.1047053509965.90  | <i>T. cruzi</i> | 184 | 1    | 184  |
| Tc00.1047053509965.90  | <i>T. cruzi</i> | 63  | 460  | 522  |
| Tc00.1047053509967.150 | <i>T. cruzi</i> | 95  | 24   | 118  |
| Tc00.1047053509967.150 | <i>T. cruzi</i> | 72  | 137  | 208  |
| Tc00.1047053509967.150 | <i>T. cruzi</i> | 230 | 311  | 540  |
| Tc00.1047053509967.150 | <i>T. cruzi</i> | 342 | 568  | 909  |
| Tc00.1047053509967.150 | <i>T. cruzi</i> | 259 | 917  | 1175 |
| Tc00.1047053509967.170 | <i>T. cruzi</i> | 74  | 197  | 270  |
| Tc00.1047053509967.180 | <i>T. cruzi</i> | 658 | 1    | 658  |
| Tc00.1047053509967.20  | <i>T. cruzi</i> | 57  | 77   | 133  |
| Tc00.1047053509967.20  | <i>T. cruzi</i> | 41  | 174  | 214  |
| Tc00.1047053509967.20  | <i>T. cruzi</i> | 46  | 379  | 424  |
| Tc00.1047053509967.20  | <i>T. cruzi</i> | 71  | 537  | 607  |
| Tc00.1047053509967.20  | <i>T. cruzi</i> | 58  | 756  | 813  |
| Tc00.1047053509967.20  | <i>T. cruzi</i> | 82  | 1174 | 1255 |
| Tc00.1047053509967.40  | <i>T. cruzi</i> | 73  | 1    | 73   |
| Tc00.1047053509967.50  | <i>T. cruzi</i> | 43  | 20   | 62   |
| Tc00.1047053509967.70  | <i>T. cruzi</i> | 108 | 1    | 108  |
| Tc00.1047053509967.70  | <i>T. cruzi</i> | 95  | 300  | 394  |
| Tc00.1047053509967.70  | <i>T. cruzi</i> | 47  | 544  | 590  |
| Tc00.1047053509967.70  | <i>T. cruzi</i> | 55  | 627  | 681  |
| Tc00.1047053509967.80  | <i>T. cruzi</i> | 130 | 106  | 235  |
| Tc00.1047053509967.90  | <i>T. cruzi</i> | 78  | 1    | 78   |
| Tc00.1047053509967.90  | <i>T. cruzi</i> | 59  | 155  | 213  |
| Tc00.1047053509967.90  | <i>T. cruzi</i> | 120 | 386  | 505  |
| Tc00.1047053509967.90  | <i>T. cruzi</i> | 76  | 534  | 609  |
| Tc00.1047053509967.90  | <i>T. cruzi</i> | 129 | 612  | 740  |
| Tc00.1047053509973.10  | <i>T. cruzi</i> | 101 | 57   | 157  |
| Tc00.1047053509973.70  | <i>T. cruzi</i> | 203 | 54   | 256  |
| Tc00.1047053509973.80  | <i>T. cruzi</i> | 251 | 14   | 264  |
| Tc00.1047053509975.30  | <i>T. cruzi</i> | 201 | 55   | 255  |
| Tc00.1047053509977.100 | <i>T. cruzi</i> | 43  | 164  | 206  |
| Tc00.1047053509977.30  | <i>T. cruzi</i> | 198 | 57   | 254  |
| Tc00.1047053509977.40  | <i>T. cruzi</i> | 228 | 27   | 254  |
| Tc00.1047053509977.80  | <i>T. cruzi</i> | 122 | 56   | 177  |
| Tc00.1047053509977.90  | <i>T. cruzi</i> | 254 | 14   | 267  |
| Tc00.1047053509979.10  | <i>T. cruzi</i> | 80  | 26   | 105  |
| Tc00.1047053509979.10  | <i>T. cruzi</i> | 49  | 336  | 384  |
| Tc00.1047053509979.10  | <i>T. cruzi</i> | 49  | 336  | 384  |
| Tc00.1047053509979.100 | <i>T. cruzi</i> | 94  | 209  | 302  |
| Tc00.1047053509979.100 | <i>T. cruzi</i> | 151 | 363  | 513  |
| Tc00.1047053509979.110 | <i>T. cruzi</i> | 56  | 98   | 153  |

|                        |                 |     |      |      |
|------------------------|-----------------|-----|------|------|
| Tc00.1047053509979.110 | <i>T. cruzi</i> | 54  | 177  | 230  |
| Tc00.1047053509979.130 | <i>T. cruzi</i> | 144 | 46   | 189  |
| Tc00.1047053509979.130 | <i>T. cruzi</i> | 55  | 349  | 403  |
| Tc00.1047053509979.130 | <i>T. cruzi</i> | 151 | 583  | 733  |
| Tc00.1047053509979.130 | <i>T. cruzi</i> | 45  | 869  | 913  |
| Tc00.1047053509979.140 | <i>T. cruzi</i> | 57  | 91   | 147  |
| Tc00.1047053509979.174 | <i>T. cruzi</i> | 149 | 56   | 204  |
| Tc00.1047053509979.20  | <i>T. cruzi</i> | 123 | 34   | 156  |
| Tc00.1047053509979.20  | <i>T. cruzi</i> | 65  | 345  | 409  |
| Tc00.1047053509979.20  | <i>T. cruzi</i> | 70  | 480  | 549  |
| Tc00.1047053509979.20  | <i>T. cruzi</i> | 65  | 595  | 659  |
| Tc00.1047053509979.200 | <i>T. cruzi</i> | 143 | 62   | 204  |
| Tc00.1047053509979.230 | <i>T. cruzi</i> | 68  | 189  | 256  |
| Tc00.1047053509979.270 | <i>T. cruzi</i> | 148 | 59   | 206  |
| Tc00.1047053509979.30  | <i>T. cruzi</i> | 130 | 1528 | 1657 |
| Tc00.1047053509979.30  | <i>T. cruzi</i> | 60  | 1996 | 2055 |
| Tc00.1047053509979.30  | <i>T. cruzi</i> | 54  | 2166 | 2219 |
| Tc00.1047053509979.30  | <i>T. cruzi</i> | 66  | 2257 | 2322 |
| Tc00.1047053509979.30  | <i>T. cruzi</i> | 60  | 3121 | 3180 |
| Tc00.1047053509979.30  | <i>T. cruzi</i> | 128 | 3925 | 4052 |
| Tc00.1047053509979.30  | <i>T. cruzi</i> | 40  | 4172 | 4211 |
| Tc00.1047053509979.30  | <i>T. cruzi</i> | 130 | 4296 | 4425 |
| Tc00.1047053509979.320 | <i>T. cruzi</i> | 55  | 137  | 191  |
| Tc00.1047053509979.320 | <i>T. cruzi</i> | 57  | 295  | 351  |
| Tc00.1047053509979.320 | <i>T. cruzi</i> | 57  | 295  | 351  |
| Tc00.1047053509979.350 | <i>T. cruzi</i> | 270 | 36   | 305  |
| Tc00.1047053509979.40  | <i>T. cruzi</i> | 58  | 126  | 183  |
| Tc00.1047053509979.40  | <i>T. cruzi</i> | 67  | 315  | 381  |
| Tc00.1047053509979.40  | <i>T. cruzi</i> | 71  | 1992 | 2062 |
| Tc00.1047053509979.70  | <i>T. cruzi</i> | 140 | 42   | 181  |
| Tc00.1047053509979.90  | <i>T. cruzi</i> | 43  | 1    | 43   |
| Tc00.1047053509979.90  | <i>T. cruzi</i> | 65  | 63   | 127  |
| Tc00.1047053509979.90  | <i>T. cruzi</i> | 65  | 63   | 127  |
| Tc00.1047053509979.95  | <i>T. cruzi</i> | 43  | 1    | 43   |
| Tc00.1047053509979.95  | <i>T. cruzi</i> | 65  | 63   | 127  |
| Tc00.1047053509979.95  | <i>T. cruzi</i> | 65  | 63   | 127  |
| Tc00.1047053509993.10  | <i>T. cruzi</i> | 82  | 20   | 101  |
| Tc00.1047053509993.20  | <i>T. cruzi</i> | 117 | 23   | 139  |
| Tc00.1047053509993.40  | <i>T. cruzi</i> | 83  | 24   | 106  |
| Tc00.1047053509993.60  | <i>T. cruzi</i> | 82  | 23   | 104  |
| Tc00.1047053510011.9   | <i>T. cruzi</i> | 240 | 48   | 287  |
| Tc00.1047053510013.110 | <i>T. cruzi</i> | 167 | 21   | 187  |
| Tc00.1047053510013.120 | <i>T. cruzi</i> | 43  | 73   | 115  |
| Tc00.1047053510013.120 | <i>T. cruzi</i> | 58  | 260  | 317  |
| Tc00.1047053510013.120 | <i>T. cruzi</i> | 159 | 547  | 705  |
| Tc00.1047053510013.170 | <i>T. cruzi</i> | 144 | 48   | 191  |
| Tc00.1047053510013.180 | <i>T. cruzi</i> | 51  | 87   | 137  |

|                        |                 |     |     |     |
|------------------------|-----------------|-----|-----|-----|
| Tc00.1047053510013.190 | <i>T. cruzi</i> | 118 | 1   | 118 |
| Tc00.1047053510013.200 | <i>T. cruzi</i> | 251 | 116 | 366 |
| Tc00.1047053510013.230 | <i>T. cruzi</i> | 250 | 23  | 272 |
| Tc00.1047053510013.240 | <i>T. cruzi</i> | 146 | 27  | 172 |
| Tc00.1047053510013.260 | <i>T. cruzi</i> | 359 | 31  | 389 |
| Tc00.1047053510013.290 | <i>T. cruzi</i> | 256 | 27  | 282 |
| Tc00.1047053510013.300 | <i>T. cruzi</i> | 135 | 23  | 157 |
| Tc00.1047053510013.310 | <i>T. cruzi</i> | 496 | 53  | 548 |
| Tc00.1047053510013.330 | <i>T. cruzi</i> | 118 | 1   | 118 |
| Tc00.1047053510013.40  | <i>T. cruzi</i> | 341 | 63  | 403 |
| Tc00.1047053510013.50  | <i>T. cruzi</i> | 66  | 315 | 380 |
| Tc00.1047053510013.70  | <i>T. cruzi</i> | 239 | 29  | 267 |
| Tc00.1047053510015.10  | <i>T. cruzi</i> | 80  | 121 | 200 |
| Tc00.1047053510015.20  | <i>T. cruzi</i> | 187 | 36  | 222 |
| Tc00.1047053510015.30  | <i>T. cruzi</i> | 595 | 29  | 623 |
| Tc00.1047053510017.40  | <i>T. cruzi</i> | 149 | 25  | 173 |
| Tc00.1047053510019.10  | <i>T. cruzi</i> | 186 | 36  | 221 |
| Tc00.1047053510019.30  | <i>T. cruzi</i> | 442 | 26  | 467 |
| Tc00.1047053510021.10  | <i>T. cruzi</i> | 191 | 1   | 191 |
| Tc00.1047053510021.100 | <i>T. cruzi</i> | 167 | 19  | 185 |
| Tc00.1047053510021.120 | <i>T. cruzi</i> | 51  | 1   | 51  |
| Tc00.1047053510021.120 | <i>T. cruzi</i> | 47  | 132 | 178 |
| Tc00.1047053510021.120 | <i>T. cruzi</i> | 58  | 296 | 353 |
| Tc00.1047053510021.120 | <i>T. cruzi</i> | 49  | 735 | 783 |
| Tc00.1047053510021.130 | <i>T. cruzi</i> | 347 | 72  | 418 |
| Tc00.1047053510021.160 | <i>T. cruzi</i> | 248 | 118 | 365 |
| Tc00.1047053510021.180 | <i>T. cruzi</i> | 66  | 42  | 107 |
| Tc00.1047053510021.180 | <i>T. cruzi</i> | 51  | 189 | 239 |
| Tc00.1047053510021.180 | <i>T. cruzi</i> | 70  | 336 | 405 |
| Tc00.1047053510021.20  | <i>T. cruzi</i> | 262 | 26  | 287 |
| Tc00.1047053510021.200 | <i>T. cruzi</i> | 145 | 26  | 170 |
| Tc00.1047053510021.220 | <i>T. cruzi</i> | 41  | 1   | 41  |
| Tc00.1047053510021.220 | <i>T. cruzi</i> | 52  | 127 | 178 |
| Tc00.1047053510021.220 | <i>T. cruzi</i> | 42  | 467 | 508 |
| Tc00.1047053510021.220 | <i>T. cruzi</i> | 106 | 719 | 824 |
| Tc00.1047053510021.30  | <i>T. cruzi</i> | 180 | 12  | 191 |
| Tc00.1047053510021.50  | <i>T. cruzi</i> | 254 | 23  | 276 |
| Tc00.1047053510021.60  | <i>T. cruzi</i> | 111 | 56  | 166 |
| Tc00.1047053510021.80  | <i>T. cruzi</i> | 175 | 170 | 344 |
| Tc00.1047053510023.20  | <i>T. cruzi</i> | 152 | 24  | 175 |
| Tc00.1047053510023.30  | <i>T. cruzi</i> | 176 | 27  | 202 |
| Tc00.1047053510025.100 | <i>T. cruzi</i> | 330 | 70  | 399 |
| Tc00.1047053510025.150 | <i>T. cruzi</i> | 188 | 1   | 188 |
| Tc00.1047053510025.160 | <i>T. cruzi</i> | 353 | 74  | 426 |
| Tc00.1047053510025.170 | <i>T. cruzi</i> | 169 | 25  | 193 |
| Tc00.1047053510025.180 | <i>T. cruzi</i> | 334 | 27  | 360 |
| Tc00.1047053510025.20  | <i>T. cruzi</i> | 154 | 24  | 177 |



|                        |                 |     |      |      |
|------------------------|-----------------|-----|------|------|
| Tc00.1047053510025.210 | <i>T. cruzi</i> | 189 | 1    | 189  |
| Tc00.1047053510025.220 | <i>T. cruzi</i> | 231 | 30   | 260  |
| Tc00.1047053510025.260 | <i>T. cruzi</i> | 352 | 66   | 417  |
| Tc00.1047053510025.50  | <i>T. cruzi</i> | 96  | 63   | 158  |
| Tc00.1047053510025.50  | <i>T. cruzi</i> | 45  | 199  | 243  |
| Tc00.1047053510025.50  | <i>T. cruzi</i> | 44  | 787  | 830  |
| Tc00.1047053510025.60  | <i>T. cruzi</i> | 109 | 63   | 171  |
| Tc00.1047053510025.60  | <i>T. cruzi</i> | 51  | 216  | 266  |
| Tc00.1047053510025.70  | <i>T. cruzi</i> | 265 | 105  | 369  |
| Tc00.1047053510025.90  | <i>T. cruzi</i> | 197 | 23   | 219  |
| Tc00.1047053510027.20  | <i>T. cruzi</i> | 52  | 175  | 226  |
| Tc00.1047053510029.30  | <i>T. cruzi</i> | 59  | 431  | 489  |
| Tc00.1047053510053.20  | <i>T. cruzi</i> | 46  | 580  | 625  |
| Tc00.1047053510053.40  | <i>T. cruzi</i> | 66  | 355  | 420  |
| Tc00.1047053510053.40  | <i>T. cruzi</i> | 60  | 638  | 697  |
| Tc00.1047053510053.40  | <i>T. cruzi</i> | 60  | 638  | 697  |
| Tc00.1047053510053.50  | <i>T. cruzi</i> | 44  | 1    | 44   |
| Tc00.1047053510053.50  | <i>T. cruzi</i> | 66  | 199  | 264  |
| Tc00.1047053510053.50  | <i>T. cruzi</i> | 66  | 199  | 264  |
| Tc00.1047053510053.70  | <i>T. cruzi</i> | 88  | 79   | 166  |
| Tc00.1047053510055.100 | <i>T. cruzi</i> | 80  | 1    | 80   |
| Tc00.1047053510055.100 | <i>T. cruzi</i> | 88  | 143  | 230  |
| Tc00.1047053510055.100 | <i>T. cruzi</i> | 370 | 339  | 708  |
| Tc00.1047053510055.100 | <i>T. cruzi</i> | 361 | 779  | 1139 |
| Tc00.1047053510055.100 | <i>T. cruzi</i> | 47  | 1155 | 1201 |
| Tc00.1047053510055.100 | <i>T. cruzi</i> | 62  | 1249 | 1310 |
| Tc00.1047053510055.140 | <i>T. cruzi</i> | 53  | 44   | 96   |
| Tc00.1047053510055.150 | <i>T. cruzi</i> | 51  | 47   | 97   |
| Tc00.1047053510055.150 | <i>T. cruzi</i> | 78  | 981  | 1058 |
| Tc00.1047053510055.150 | <i>T. cruzi</i> | 43  | 1518 | 1560 |
| Tc00.1047053510055.150 | <i>T. cruzi</i> | 41  | 1916 | 1956 |
| Tc00.1047053510055.150 | <i>T. cruzi</i> | 59  | 1961 | 2019 |
| Tc00.1047053510055.30  | <i>T. cruzi</i> | 79  | 112  | 190  |
| Tc00.1047053510055.30  | <i>T. cruzi</i> | 67  | 337  | 403  |
| Tc00.1047053510055.50  | <i>T. cruzi</i> | 105 | 49   | 153  |
| Tc00.1047053510055.50  | <i>T. cruzi</i> | 78  | 383  | 460  |
| Tc00.1047053510055.50  | <i>T. cruzi</i> | 52  | 548  | 599  |
| Tc00.1047053510055.50  | <i>T. cruzi</i> | 261 | 715  | 975  |
| Tc00.1047053510055.60  | <i>T. cruzi</i> | 53  | 279  | 331  |
| Tc00.1047053510055.60  | <i>T. cruzi</i> | 50  | 484  | 533  |
| Tc00.1047053510055.60  | <i>T. cruzi</i> | 50  | 484  | 533  |
| Tc00.1047053510055.70  | <i>T. cruzi</i> | 279 | 1    | 279  |
| Tc00.1047053510055.70  | <i>T. cruzi</i> | 47  | 300  | 346  |
| Tc00.1047053510055.70  | <i>T. cruzi</i> | 59  | 361  | 419  |
| Tc00.1047053510055.70  | <i>T. cruzi</i> | 156 | 457  | 612  |
| Tc00.1047053510055.70  | <i>T. cruzi</i> | 48  | 741  | 788  |
| Tc00.1047053510055.80  | <i>T. cruzi</i> | 56  | 189  | 244  |

|                        |                 |     |      |      |
|------------------------|-----------------|-----|------|------|
| Tc00.1047053510055.80  | <i>T. cruzi</i> | 57  | 367  | 423  |
| Tc00.1047053510057.20  | <i>T. cruzi</i> | 110 | 146  | 255  |
| Tc00.1047053510057.30  | <i>T. cruzi</i> | 45  | 1    | 45   |
| Tc00.1047053510057.30  | <i>T. cruzi</i> | 58  | 91   | 148  |
| Tc00.1047053510057.4   | <i>T. cruzi</i> | 195 | 1    | 195  |
| Tc00.1047053510057.4   | <i>T. cruzi</i> | 99  | 255  | 353  |
| Tc00.1047053510061.20  | <i>T. cruzi</i> | 161 | 1    | 161  |
| Tc00.1047053510061.30  | <i>T. cruzi</i> | 68  | 50   | 117  |
| Tc00.1047053510061.30  | <i>T. cruzi</i> | 46  | 201  | 246  |
| Tc00.1047053510061.30  | <i>T. cruzi</i> | 59  | 795  | 853  |
| Tc00.1047053510073.24  | <i>T. cruzi</i> | 43  | 263  | 305  |
| Tc00.1047053510073.30  | <i>T. cruzi</i> | 322 | 103  | 424  |
| Tc00.1047053510073.30  | <i>T. cruzi</i> | 96  | 430  | 525  |
| Tc00.1047053510073.30  | <i>T. cruzi</i> | 53  | 926  | 978  |
| Tc00.1047053510073.50  | <i>T. cruzi</i> | 80  | 132  | 211  |
| Tc00.1047053510073.50  | <i>T. cruzi</i> | 58  | 240  | 297  |
| Tc00.1047053510073.50  | <i>T. cruzi</i> | 58  | 240  | 297  |
| Tc00.1047053510073.70  | <i>T. cruzi</i> | 124 | 1    | 124  |
| Tc00.1047053510073.70  | <i>T. cruzi</i> | 81  | 266  | 346  |
| Tc00.1047053510073.80  | <i>T. cruzi</i> | 121 | 48   | 168  |
| Tc00.1047053510073.80  | <i>T. cruzi</i> | 274 | 229  | 502  |
| Tc00.1047053510073.80  | <i>T. cruzi</i> | 65  | 516  | 580  |
| Tc00.1047053510073.80  | <i>T. cruzi</i> | 207 | 585  | 791  |
| Tc00.1047053510073.90  | <i>T. cruzi</i> | 69  | 1    | 69   |
| Tc00.1047053510073.90  | <i>T. cruzi</i> | 67  | 130  | 196  |
| Tc00.1047053510073.90  | <i>T. cruzi</i> | 102 | 239  | 340  |
| Tc00.1047053510073.90  | <i>T. cruzi</i> | 62  | 417  | 478  |
| Tc00.1047053510073.90  | <i>T. cruzi</i> | 44  | 513  | 556  |
| Tc00.1047053510073.90  | <i>T. cruzi</i> | 140 | 625  | 764  |
| Tc00.1047053510075.30  | <i>T. cruzi</i> | 46  | 1    | 46   |
| Tc00.1047053510075.30  | <i>T. cruzi</i> | 82  | 115  | 196  |
| Tc00.1047053510075.30  | <i>T. cruzi</i> | 243 | 286  | 528  |
| Tc00.1047053510075.30  | <i>T. cruzi</i> | 71  | 629  | 699  |
| Tc00.1047053510075.30  | <i>T. cruzi</i> | 73  | 1492 | 1564 |
| Tc00.1047053510075.30  | <i>T. cruzi</i> | 167 | 1571 | 1737 |
| Tc00.1047053510075.40  | <i>T. cruzi</i> | 102 | 267  | 368  |
| Tc00.1047053510075.40  | <i>T. cruzi</i> | 49  | 430  | 478  |
| Tc00.1047053510075.50  | <i>T. cruzi</i> | 56  | 12   | 67   |
| Tc00.1047053510075.50  | <i>T. cruzi</i> | 117 | 518  | 634  |
| Tc00.1047053510075.50  | <i>T. cruzi</i> | 358 | 639  | 996  |
| Tc00.1047053510075.50  | <i>T. cruzi</i> | 84  | 1387 | 1470 |
| Tc00.1047053510077.30  | <i>T. cruzi</i> | 137 | 311  | 447  |
| Tc00.1047053510089.10  | <i>T. cruzi</i> | 257 | 34   | 290  |
| Tc00.1047053510089.110 | <i>T. cruzi</i> | 46  | 1    | 46   |
| Tc00.1047053510089.130 | <i>T. cruzi</i> | 104 | 1    | 104  |
| Tc00.1047053510089.130 | <i>T. cruzi</i> | 43  | 370  | 412  |
| Tc00.1047053510089.170 | <i>T. cruzi</i> | 63  | 352  | 414  |

|                        |                 |     |      |      |
|------------------------|-----------------|-----|------|------|
| Tc00.1047053510089.180 | <i>T. cruzi</i> | 259 | 93   | 351  |
| Tc00.1047053510089.180 | <i>T. cruzi</i> | 66  | 595  | 660  |
| Tc00.1047053510089.180 | <i>T. cruzi</i> | 91  | 707  | 797  |
| Tc00.1047053510089.190 | <i>T. cruzi</i> | 49  | 86   | 134  |
| Tc00.1047053510089.20  | <i>T. cruzi</i> | 77  | 1    | 77   |
| Tc00.1047053510089.200 | <i>T. cruzi</i> | 75  | 194  | 268  |
| Tc00.1047053510089.64  | <i>T. cruzi</i> | 105 | 178  | 282  |
| Tc00.1047053510089.80  | <i>T. cruzi</i> | 216 | 1    | 216  |
| Tc00.1047053510089.80  | <i>T. cruzi</i> | 48  | 524  | 571  |
| Tc00.1047053510089.90  | <i>T. cruzi</i> | 45  | 225  | 269  |
| Tc00.1047053510089.90  | <i>T. cruzi</i> | 45  | 468  | 512  |
| Tc00.1047053510089.90  | <i>T. cruzi</i> | 45  | 468  | 512  |
| Tc00.1047053510091.100 | <i>T. cruzi</i> | 52  | 59   | 110  |
| Tc00.1047053510091.110 | <i>T. cruzi</i> | 82  | 23   | 104  |
| Tc00.1047053510091.110 | <i>T. cruzi</i> | 112 | 190  | 301  |
| Tc00.1047053510091.130 | <i>T. cruzi</i> | 64  | 72   | 135  |
| Tc00.1047053510091.130 | <i>T. cruzi</i> | 143 | 207  | 349  |
| Tc00.1047053510091.50  | <i>T. cruzi</i> | 49  | 61   | 109  |
| Tc00.1047053510091.60  | <i>T. cruzi</i> | 66  | 21   | 86   |
| Tc00.1047053510091.60  | <i>T. cruzi</i> | 89  | 275  | 363  |
| Tc00.1047053510091.60  | <i>T. cruzi</i> | 134 | 398  | 531  |
| Tc00.1047053510091.60  | <i>T. cruzi</i> | 58  | 643  | 700  |
| Tc00.1047053510091.60  | <i>T. cruzi</i> | 74  | 745  | 818  |
| Tc00.1047053510091.90  | <i>T. cruzi</i> | 40  | 1    | 40   |
| Tc00.1047053510091.90  | <i>T. cruzi</i> | 46  | 244  | 289  |
| Tc00.1047053510091.90  | <i>T. cruzi</i> | 107 | 926  | 1032 |
| Tc00.1047053510091.90  | <i>T. cruzi</i> | 89  | 1257 | 1345 |
| Tc00.1047053510101.110 | <i>T. cruzi</i> | 51  | 1    | 51   |
| Tc00.1047053510101.110 | <i>T. cruzi</i> | 49  | 78   | 126  |
| Tc00.1047053510101.110 | <i>T. cruzi</i> | 69  | 184  | 252  |
| Tc00.1047053510101.110 | <i>T. cruzi</i> | 42  | 716  | 757  |
| Tc00.1047053510101.130 | <i>T. cruzi</i> | 68  | 1    | 68   |
| Tc00.1047053510101.130 | <i>T. cruzi</i> | 63  | 440  | 502  |
| Tc00.1047053510101.160 | <i>T. cruzi</i> | 71  | 75   | 145  |
| Tc00.1047053510101.190 | <i>T. cruzi</i> | 108 | 182  | 289  |
| Tc00.1047053510101.200 | <i>T. cruzi</i> | 120 | 169  | 288  |
| Tc00.1047053510101.200 | <i>T. cruzi</i> | 47  | 300  | 346  |
| Tc00.1047053510101.200 | <i>T. cruzi</i> | 96  | 370  | 465  |
| Tc00.1047053510101.210 | <i>T. cruzi</i> | 103 | 294  | 396  |
| Tc00.1047053510101.240 | <i>T. cruzi</i> | 103 | 89   | 191  |
| Tc00.1047053510101.250 | <i>T. cruzi</i> | 63  | 150  | 212  |
| Tc00.1047053510101.260 | <i>T. cruzi</i> | 96  | 1    | 96   |
| Tc00.1047053510101.280 | <i>T. cruzi</i> | 52  | 427  | 478  |
| Tc00.1047053510101.280 | <i>T. cruzi</i> | 82  | 480  | 561  |
| Tc00.1047053510101.280 | <i>T. cruzi</i> | 45  | 594  | 638  |
| Tc00.1047053510101.280 | <i>T. cruzi</i> | 310 | 729  | 1038 |
| Tc00.1047053510101.290 | <i>T. cruzi</i> | 44  | 1    | 44   |

|                        |                 |     |      |      |
|------------------------|-----------------|-----|------|------|
| Tc00.1047053510101.290 | <i>T. cruzi</i> | 53  | 142  | 194  |
| Tc00.1047053510101.290 | <i>T. cruzi</i> | 61  | 528  | 588  |
| Tc00.1047053510101.290 | <i>T. cruzi</i> | 48  | 809  | 856  |
| Tc00.1047053510101.290 | <i>T. cruzi</i> | 56  | 1101 | 1156 |
| Tc00.1047053510101.290 | <i>T. cruzi</i> | 196 | 1213 | 1408 |
| Tc00.1047053510101.290 | <i>T. cruzi</i> | 115 | 1422 | 1536 |
| Tc00.1047053510101.30  | <i>T. cruzi</i> | 84  | 63   | 146  |
| Tc00.1047053510101.300 | <i>T. cruzi</i> | 57  | 529  | 585  |
| Tc00.1047053510101.300 | <i>T. cruzi</i> | 42  | 1365 | 1406 |
| Tc00.1047053510101.300 | <i>T. cruzi</i> | 42  | 1365 | 1406 |
| Tc00.1047053510101.310 | <i>T. cruzi</i> | 95  | 546  | 640  |
| Tc00.1047053510101.320 | <i>T. cruzi</i> | 71  | 1    | 71   |
| Tc00.1047053510101.320 | <i>T. cruzi</i> | 109 | 111  | 219  |
| Tc00.1047053510101.320 | <i>T. cruzi</i> | 138 | 250  | 387  |
| Tc00.1047053510101.340 | <i>T. cruzi</i> | 146 | 36   | 181  |
| Tc00.1047053510101.340 | <i>T. cruzi</i> | 93  | 216  | 308  |
| Tc00.1047053510101.340 | <i>T. cruzi</i> | 56  | 330  | 385  |
| Tc00.1047053510101.340 | <i>T. cruzi</i> | 46  | 449  | 494  |
| Tc00.1047053510101.340 | <i>T. cruzi</i> | 55  | 677  | 731  |
| Tc00.1047053510101.340 | <i>T. cruzi</i> | 310 | 775  | 1084 |
| Tc00.1047053510101.340 | <i>T. cruzi</i> | 203 | 1112 | 1314 |
| Tc00.1047053510101.350 | <i>T. cruzi</i> | 192 | 1    | 192  |
| Tc00.1047053510101.350 | <i>T. cruzi</i> | 236 | 238  | 473  |
| Tc00.1047053510101.380 | <i>T. cruzi</i> | 54  | 858  | 911  |
| Tc00.1047053510101.40  | <i>T. cruzi</i> | 84  | 63   | 146  |
| Tc00.1047053510101.400 | <i>T. cruzi</i> | 46  | 340  | 385  |
| Tc00.1047053510101.400 | <i>T. cruzi</i> | 43  | 415  | 457  |
| Tc00.1047053510101.400 | <i>T. cruzi</i> | 120 | 459  | 578  |
| Tc00.1047053510101.410 | <i>T. cruzi</i> | 43  | 10   | 52   |
| Tc00.1047053510101.410 | <i>T. cruzi</i> | 50  | 207  | 256  |
| Tc00.1047053510101.410 | <i>T. cruzi</i> | 50  | 207  | 256  |
| Tc00.1047053510101.420 | <i>T. cruzi</i> | 151 | 86   | 236  |
| Tc00.1047053510101.430 | <i>T. cruzi</i> | 166 | 86   | 251  |
| Tc00.1047053510101.440 | <i>T. cruzi</i> | 100 | 85   | 184  |
| Tc00.1047053510101.450 | <i>T. cruzi</i> | 61  | 1    | 61   |
| Tc00.1047053510101.460 | <i>T. cruzi</i> | 75  | 41   | 115  |
| Tc00.1047053510101.460 | <i>T. cruzi</i> | 74  | 323  | 396  |
| Tc00.1047053510101.460 | <i>T. cruzi</i> | 94  | 491  | 584  |
| Tc00.1047053510101.470 | <i>T. cruzi</i> | 58  | 242  | 299  |
| Tc00.1047053510101.470 | <i>T. cruzi</i> | 79  | 427  | 505  |
| Tc00.1047053510101.480 | <i>T. cruzi</i> | 238 | 68   | 305  |
| Tc00.1047053510101.480 | <i>T. cruzi</i> | 119 | 336  | 454  |
| Tc00.1047053510101.59  | <i>T. cruzi</i> | 240 | 17   | 256  |
| Tc00.1047053510101.59  | <i>T. cruzi</i> | 144 | 291  | 434  |
| Tc00.1047053510101.59  | <i>T. cruzi</i> | 144 | 291  | 434  |
| Tc00.1047053510101.80  | <i>T. cruzi</i> | 56  | 1    | 56   |
| Tc00.1047053510101.80  | <i>T. cruzi</i> | 210 | 263  | 472  |

|                        |                 |     |      |      |
|------------------------|-----------------|-----|------|------|
| Tc00.1047053510101.90  | <i>T. cruzi</i> | 41  | 28   | 68   |
| Tc00.1047053510103.10  | <i>T. cruzi</i> | 50  | 178  | 227  |
| Tc00.1047053510103.24  | <i>T. cruzi</i> | 47  | 310  | 356  |
| Tc00.1047053510105.120 | <i>T. cruzi</i> | 51  | 801  | 851  |
| Tc00.1047053510105.120 | <i>T. cruzi</i> | 40  | 1218 | 1257 |
| Tc00.1047053510105.120 | <i>T. cruzi</i> | 40  | 1218 | 1257 |
| Tc00.1047053510105.160 | <i>T. cruzi</i> | 95  | 110  | 204  |
| Tc00.1047053510105.160 | <i>T. cruzi</i> | 40  | 376  | 415  |
| Tc00.1047053510105.170 | <i>T. cruzi</i> | 129 | 105  | 233  |
| Tc00.1047053510105.180 | <i>T. cruzi</i> | 41  | 716  | 756  |
| Tc00.1047053510105.184 | <i>T. cruzi</i> | 47  | 37   | 83   |
| Tc00.1047053510105.190 | <i>T. cruzi</i> | 56  | 149  | 204  |
| Tc00.1047053510105.190 | <i>T. cruzi</i> | 166 | 214  | 379  |
| Tc00.1047053510105.200 | <i>T. cruzi</i> | 137 | 1    | 137  |
| Tc00.1047053510105.200 | <i>T. cruzi</i> | 43  | 312  | 354  |
| Tc00.1047053510105.200 | <i>T. cruzi</i> | 63  | 357  | 419  |
| Tc00.1047053510105.200 | <i>T. cruzi</i> | 69  | 446  | 514  |
| Tc00.1047053510105.200 | <i>T. cruzi</i> | 72  | 575  | 646  |
| Tc00.1047053510105.210 | <i>T. cruzi</i> | 53  | 40   | 92   |
| Tc00.1047053510105.210 | <i>T. cruzi</i> | 44  | 546  | 589  |
| Tc00.1047053510105.210 | <i>T. cruzi</i> | 67  | 591  | 657  |
| Tc00.1047053510105.310 | <i>T. cruzi</i> | 363 | 52   | 414  |
| Tc00.1047053510105.50  | <i>T. cruzi</i> | 68  | 1    | 68   |
| Tc00.1047053510105.9   | <i>T. cruzi</i> | 57  | 227  | 283  |
| Tc00.1047053510105.90  | <i>T. cruzi</i> | 91  | 143  | 233  |
| Tc00.1047053510105.90  | <i>T. cruzi</i> | 78  | 783  | 860  |
| Tc00.1047053510105.90  | <i>T. cruzi</i> | 78  | 783  | 860  |
| Tc00.1047053510107.15  | <i>T. cruzi</i> | 41  | 1    | 41   |
| Tc00.1047053510107.15  | <i>T. cruzi</i> | 59  | 108  | 166  |
| Tc00.1047053510107.15  | <i>T. cruzi</i> | 59  | 108  | 166  |
| Tc00.1047053510107.30  | <i>T. cruzi</i> | 310 | 29   | 338  |
| Tc00.1047053510123.10  | <i>T. cruzi</i> | 78  | 76   | 153  |
| Tc00.1047053510123.10  | <i>T. cruzi</i> | 50  | 238  | 287  |
| Tc00.1047053510123.10  | <i>T. cruzi</i> | 50  | 238  | 287  |
| Tc00.1047053510123.20  | <i>T. cruzi</i> | 42  | 243  | 284  |
| Tc00.1047053510123.20  | <i>T. cruzi</i> | 85  | 333  | 417  |
| Tc00.1047053510123.24  | <i>T. cruzi</i> | 234 | 84   | 317  |
| Tc00.1047053510123.30  | <i>T. cruzi</i> | 61  | 93   | 153  |
| Tc00.1047053510123.70  | <i>T. cruzi</i> | 60  | 1    | 60   |
| Tc00.1047053510123.70  | <i>T. cruzi</i> | 156 | 84   | 239  |
| Tc00.1047053510123.70  | <i>T. cruzi</i> | 156 | 84   | 239  |
| Tc00.1047053510125.10  | <i>T. cruzi</i> | 67  | 1    | 67   |
| Tc00.1047053510125.10  | <i>T. cruzi</i> | 78  | 124  | 201  |
| Tc00.1047053510125.10  | <i>T. cruzi</i> | 47  | 214  | 260  |
| Tc00.1047053510125.10  | <i>T. cruzi</i> | 72  | 319  | 390  |
| Tc00.1047053510125.10  | <i>T. cruzi</i> | 60  | 669  | 728  |
| Tc00.1047053510125.20  | <i>T. cruzi</i> | 42  | 1    | 42   |

|                        |                 |     |      |      |
|------------------------|-----------------|-----|------|------|
| Tc00.1047053510125.20  | <i>T. cruzi</i> | 324 | 689  | 1012 |
| Tc00.1047053510127.79  | <i>T. cruzi</i> | 52  | 1    | 52   |
| Tc00.1047053510141.10  | <i>T. cruzi</i> | 63  | 69   | 131  |
| Tc00.1047053510141.20  | <i>T. cruzi</i> | 54  | 502  | 555  |
| Tc00.1047053510141.4   | <i>T. cruzi</i> | 48  | 99   | 146  |
| Tc00.1047053510143.110 | <i>T. cruzi</i> | 62  | 180  | 241  |
| Tc00.1047053510143.110 | <i>T. cruzi</i> | 109 | 275  | 383  |
| Tc00.1047053510143.110 | <i>T. cruzi</i> | 111 | 387  | 497  |
| Tc00.1047053510143.110 | <i>T. cruzi</i> | 123 | 526  | 648  |
| Tc00.1047053510143.120 | <i>T. cruzi</i> | 176 | 92   | 267  |
| Tc00.1047053510143.120 | <i>T. cruzi</i> | 54  | 272  | 325  |
| Tc00.1047053510143.120 | <i>T. cruzi</i> | 123 | 361  | 483  |
| Tc00.1047053510143.17  | <i>T. cruzi</i> | 67  | 1    | 67   |
| Tc00.1047053510143.24  | <i>T. cruzi</i> | 97  | 21   | 117  |
| Tc00.1047053510143.24  | <i>T. cruzi</i> | 255 | 208  | 462  |
| Tc00.1047053510143.30  | <i>T. cruzi</i> | 54  | 49   | 102  |
| Tc00.1047053510143.30  | <i>T. cruzi</i> | 40  | 225  | 264  |
| Tc00.1047053510143.40  | <i>T. cruzi</i> | 104 | 30   | 133  |
| Tc00.1047053510143.50  | <i>T. cruzi</i> | 79  | 160  | 238  |
| Tc00.1047053510143.50  | <i>T. cruzi</i> | 48  | 244  | 291  |
| Tc00.1047053510143.50  | <i>T. cruzi</i> | 84  | 362  | 445  |
| Tc00.1047053510143.50  | <i>T. cruzi</i> | 49  | 667  | 715  |
| Tc00.1047053510143.50  | <i>T. cruzi</i> | 115 | 1199 | 1313 |
| Tc00.1047053510143.60  | <i>T. cruzi</i> | 42  | 133  | 174  |
| Tc00.1047053510143.70  | <i>T. cruzi</i> | 60  | 1    | 60   |
| Tc00.1047053510143.70  | <i>T. cruzi</i> | 236 | 72   | 307  |
| Tc00.1047053510143.70  | <i>T. cruzi</i> | 206 | 309  | 514  |
| Tc00.1047053510143.70  | <i>T. cruzi</i> | 65  | 521  | 585  |
| Tc00.1047053510143.80  | <i>T. cruzi</i> | 67  | 195  | 261  |
| Tc00.1047053510143.90  | <i>T. cruzi</i> | 40  | 32   | 71   |
| Tc00.1047053510145.30  | <i>T. cruzi</i> | 63  | 41   | 103  |
| Tc00.1047053510145.30  | <i>T. cruzi</i> | 84  | 258  | 341  |
| Tc00.1047053510145.30  | <i>T. cruzi</i> | 84  | 258  | 341  |
| Tc00.1047053510145.50  | <i>T. cruzi</i> | 192 | 1    | 192  |
| Tc00.1047053510145.50  | <i>T. cruzi</i> | 132 | 313  | 444  |
| Tc00.1047053510145.50  | <i>T. cruzi</i> | 388 | 480  | 867  |
| Tc00.1047053510145.50  | <i>T. cruzi</i> | 137 | 971  | 1107 |
| Tc00.1047053510149.100 | <i>T. cruzi</i> | 60  | 10   | 69   |
| Tc00.1047053510149.110 | <i>T. cruzi</i> | 48  | 266  | 313  |
| Tc00.1047053510149.110 | <i>T. cruzi</i> | 49  | 349  | 397  |
| Tc00.1047053510149.110 | <i>T. cruzi</i> | 49  | 349  | 397  |
| Tc00.1047053510149.120 | <i>T. cruzi</i> | 58  | 120  | 177  |
| Tc00.1047053510149.120 | <i>T. cruzi</i> | 48  | 355  | 402  |
| Tc00.1047053510149.140 | <i>T. cruzi</i> | 128 | 72   | 199  |
| Tc00.1047053510149.140 | <i>T. cruzi</i> | 85  | 381  | 465  |
| Tc00.1047053510149.140 | <i>T. cruzi</i> | 137 | 553  | 689  |
| Tc00.1047053510149.20  | <i>T. cruzi</i> | 61  | 1    | 61   |

|                        |                 |     |      |      |
|------------------------|-----------------|-----|------|------|
| Tc00.1047053510149.40  | <i>T. cruzi</i> | 137 | 73   | 209  |
| Tc00.1047053510149.40  | <i>T. cruzi</i> | 131 | 223  | 353  |
| Tc00.1047053510149.40  | <i>T. cruzi</i> | 47  | 409  | 455  |
| Tc00.1047053510149.40  | <i>T. cruzi</i> | 65  | 478  | 542  |
| Tc00.1047053510149.50  | <i>T. cruzi</i> | 68  | 87   | 154  |
| Tc00.1047053510149.50  | <i>T. cruzi</i> | 55  | 178  | 232  |
| Tc00.1047053510149.50  | <i>T. cruzi</i> | 50  | 273  | 322  |
| Tc00.1047053510149.60  | <i>T. cruzi</i> | 66  | 1    | 66   |
| Tc00.1047053510149.70  | <i>T. cruzi</i> | 142 | 1    | 142  |
| Tc00.1047053510149.70  | <i>T. cruzi</i> | 128 | 272  | 399  |
| Tc00.1047053510149.70  | <i>T. cruzi</i> | 173 | 420  | 592  |
| Tc00.1047053510149.80  | <i>T. cruzi</i> | 77  | 972  | 1048 |
| Tc00.1047053510149.80  | <i>T. cruzi</i> | 46  | 1492 | 1537 |
| Tc00.1047053510149.80  | <i>T. cruzi</i> | 46  | 1492 | 1537 |
| Tc00.1047053510149.9   | <i>T. cruzi</i> | 93  | 1    | 93   |
| Tc00.1047053510149.9   | <i>T. cruzi</i> | 68  | 110  | 177  |
| Tc00.1047053510149.9   | <i>T. cruzi</i> | 67  | 230  | 296  |
| Tc00.1047053510149.9   | <i>T. cruzi</i> | 59  | 341  | 399  |
| Tc00.1047053510149.9   | <i>T. cruzi</i> | 117 | 421  | 537  |
| Tc00.1047053510149.90  | <i>T. cruzi</i> | 43  | 1    | 43   |
| Tc00.1047053510157.10  | <i>T. cruzi</i> | 329 | 27   | 355  |
| Tc00.1047053510157.5   | <i>T. cruzi</i> | 41  | 1    | 41   |
| Tc00.1047053510159.10  | <i>T. cruzi</i> | 58  | 103  | 160  |
| Tc00.1047053510161.20  | <i>T. cruzi</i> | 428 | 1    | 428  |
| Tc00.1047053510161.20  | <i>T. cruzi</i> | 72  | 445  | 516  |
| Tc00.1047053510161.20  | <i>T. cruzi</i> | 45  | 549  | 593  |
| Tc00.1047053510161.20  | <i>T. cruzi</i> | 279 | 709  | 987  |
| Tc00.1047053510161.20  | <i>T. cruzi</i> | 61  | 1004 | 1064 |
| Tc00.1047053510161.20  | <i>T. cruzi</i> | 54  | 1073 | 1126 |
| Tc00.1047053510163.10  | <i>T. cruzi</i> | 55  | 1    | 55   |
| Tc00.1047053510163.10  | <i>T. cruzi</i> | 98  | 130  | 227  |
| Tc00.1047053510163.10  | <i>T. cruzi</i> | 94  | 274  | 367  |
| Tc00.1047053510163.20  | <i>T. cruzi</i> | 69  | 203  | 271  |
| Tc00.1047053510163.30  | <i>T. cruzi</i> | 154 | 83   | 236  |
| Tc00.1047053510163.60  | <i>T. cruzi</i> | 51  | 1    | 51   |
| Tc00.1047053510163.60  | <i>T. cruzi</i> | 69  | 279  | 347  |
| Tc00.1047053510165.110 | <i>T. cruzi</i> | 79  | 1    | 79   |
| Tc00.1047053510165.110 | <i>T. cruzi</i> | 43  | 157  | 199  |
| Tc00.1047053510165.20  | <i>T. cruzi</i> | 55  | 215  | 269  |
| Tc00.1047053510165.30  | <i>T. cruzi</i> | 79  | 101  | 179  |
| Tc00.1047053510165.30  | <i>T. cruzi</i> | 64  | 390  | 453  |
| Tc00.1047053510165.30  | <i>T. cruzi</i> | 88  | 466  | 553  |
| Tc00.1047053510165.40  | <i>T. cruzi</i> | 180 | 1    | 180  |
| Tc00.1047053510165.40  | <i>T. cruzi</i> | 64  | 275  | 338  |
| Tc00.1047053510165.40  | <i>T. cruzi</i> | 141 | 378  | 518  |
| Tc00.1047053510165.40  | <i>T. cruzi</i> | 60  | 529  | 588  |
| Tc00.1047053510167.10  | <i>T. cruzi</i> | 47  | 1    | 47   |

|                        |                 |     |      |      |
|------------------------|-----------------|-----|------|------|
| Tc00.1047053510167.10  | <i>T. cruzi</i> | 49  | 105  | 153  |
| Tc00.1047053510167.10  | <i>T. cruzi</i> | 49  | 468  | 516  |
| Tc00.1047053510167.4   | <i>T. cruzi</i> | 42  | 127  | 168  |
| Tc00.1047053510171.10  | <i>T. cruzi</i> | 44  | 1    | 44   |
| Tc00.1047053510173.110 | <i>T. cruzi</i> | 53  | 256  | 308  |
| Tc00.1047053510173.110 | <i>T. cruzi</i> | 140 | 404  | 543  |
| Tc00.1047053510173.110 | <i>T. cruzi</i> | 140 | 404  | 543  |
| Tc00.1047053510173.120 | <i>T. cruzi</i> | 195 | 1    | 195  |
| Tc00.1047053510173.120 | <i>T. cruzi</i> | 93  | 289  | 381  |
| Tc00.1047053510173.20  | <i>T. cruzi</i> | 220 | 34   | 253  |
| Tc00.1047053510173.40  | <i>T. cruzi</i> | 40  | 52   | 91   |
| Tc00.1047053510173.50  | <i>T. cruzi</i> | 43  | 1    | 43   |
| Tc00.1047053510173.50  | <i>T. cruzi</i> | 81  | 112  | 192  |
| Tc00.1047053510173.50  | <i>T. cruzi</i> | 49  | 215  | 263  |
| Tc00.1047053510173.50  | <i>T. cruzi</i> | 114 | 284  | 397  |
| Tc00.1047053510173.60  | <i>T. cruzi</i> | 96  | 1067 | 1162 |
| Tc00.1047053510173.80  | <i>T. cruzi</i> | 135 | 192  | 326  |
| Tc00.1047053510173.90  | <i>T. cruzi</i> | 106 | 1    | 106  |
| Tc00.1047053510175.125 | <i>T. cruzi</i> | 40  | 1    | 40   |
| Tc00.1047053510175.125 | <i>T. cruzi</i> | 53  | 176  | 228  |
| Tc00.1047053510175.125 | <i>T. cruzi</i> | 53  | 176  | 228  |
| Tc00.1047053510175.150 | <i>T. cruzi</i> | 76  | 28   | 103  |
| Tc00.1047053510175.60  | <i>T. cruzi</i> | 56  | 212  | 267  |
| Tc00.1047053510175.60  | <i>T. cruzi</i> | 51  | 1599 | 1649 |
| Tc00.1047053510175.60  | <i>T. cruzi</i> | 77  | 2837 | 2913 |
| Tc00.1047053510175.60  | <i>T. cruzi</i> | 72  | 3393 | 3464 |
| Tc00.1047053510175.90  | <i>T. cruzi</i> | 74  | 1    | 74   |
| Tc00.1047053510175.90  | <i>T. cruzi</i> | 44  | 174  | 217  |
| Tc00.1047053510181.120 | <i>T. cruzi</i> | 91  | 100  | 190  |
| Tc00.1047053510181.130 | <i>T. cruzi</i> | 131 | 104  | 234  |
| Tc00.1047053510181.130 | <i>T. cruzi</i> | 63  | 290  | 352  |
| Tc00.1047053510181.140 | <i>T. cruzi</i> | 140 | 28   | 167  |
| Tc00.1047053510181.150 | <i>T. cruzi</i> | 52  | 44   | 95   |
| Tc00.1047053510181.30  | <i>T. cruzi</i> | 44  | 50   | 93   |
| Tc00.1047053510181.30  | <i>T. cruzi</i> | 46  | 597  | 642  |
| Tc00.1047053510181.30  | <i>T. cruzi</i> | 46  | 597  | 642  |
| Tc00.1047053510181.50  | <i>T. cruzi</i> | 44  | 46   | 89   |
| Tc00.1047053510181.60  | <i>T. cruzi</i> | 48  | 396  | 443  |
| Tc00.1047053510181.60  | <i>T. cruzi</i> | 72  | 543  | 614  |
| Tc00.1047053510181.69  | <i>T. cruzi</i> | 43  | 42   | 84   |
| Tc00.1047053510181.69  | <i>T. cruzi</i> | 50  | 432  | 481  |
| Tc00.1047053510181.69  | <i>T. cruzi</i> | 50  | 432  | 481  |
| Tc00.1047053510181.80  | <i>T. cruzi</i> | 157 | 1    | 157  |
| Tc00.1047053510181.90  | <i>T. cruzi</i> | 179 | 88   | 266  |
| Tc00.1047053510189.40  | <i>T. cruzi</i> | 392 | 68   | 459  |
| Tc00.1047053510191.10  | <i>T. cruzi</i> | 339 | 30   | 368  |
| Tc00.1047053510191.20  | <i>T. cruzi</i> | 197 | 16   | 212  |



|                        |                 |     |     |     |
|------------------------|-----------------|-----|-----|-----|
| Tc00.1047053510191.70  | <i>T. cruzi</i> | 268 | 28  | 295 |
| Tc00.1047053510191.80  | <i>T. cruzi</i> | 170 | 26  | 195 |
| Tc00.1047053510205.20  | <i>T. cruzi</i> | 324 | 25  | 348 |
| Tc00.1047053510205.30  | <i>T. cruzi</i> | 43  | 59  | 101 |
| Tc00.1047053510205.40  | <i>T. cruzi</i> | 51  | 1   | 51  |
| Tc00.1047053510205.40  | <i>T. cruzi</i> | 42  | 135 | 176 |
| Tc00.1047053510205.40  | <i>T. cruzi</i> | 79  | 279 | 357 |
| Tc00.1047053510205.50  | <i>T. cruzi</i> | 240 | 21  | 260 |
| Tc00.1047053510205.60  | <i>T. cruzi</i> | 50  | 61  | 110 |
| Tc00.1047053510207.10  | <i>T. cruzi</i> | 176 | 24  | 199 |
| Tc00.1047053510207.30  | <i>T. cruzi</i> | 93  | 1   | 93  |
| Tc00.1047053510207.30  | <i>T. cruzi</i> | 77  | 740 | 816 |
| Tc00.1047053510207.30  | <i>T. cruzi</i> | 77  | 740 | 816 |
| Tc00.1047053510207.40  | <i>T. cruzi</i> | 331 | 30  | 360 |
| Tc00.1047053510209.27  | <i>T. cruzi</i> | 275 | 26  | 300 |
| Tc00.1047053510213.20  | <i>T. cruzi</i> | 98  | 57  | 154 |
| Tc00.1047053510213.39  | <i>T. cruzi</i> | 438 | 70  | 507 |
| Tc00.1047053510213.70  | <i>T. cruzi</i> | 336 | 57  | 392 |
| Tc00.1047053510213.80  | <i>T. cruzi</i> | 177 | 28  | 204 |
| Tc00.1047053510213.9   | <i>T. cruzi</i> | 307 | 81  | 387 |
| Tc00.1047053510227.20  | <i>T. cruzi</i> | 44  | 109 | 152 |
| Tc00.1047053510227.20  | <i>T. cruzi</i> | 103 | 265 | 367 |
| Tc00.1047053510227.20  | <i>T. cruzi</i> | 103 | 265 | 367 |
| Tc00.1047053510227.29  | <i>T. cruzi</i> | 47  | 134 | 180 |
| Tc00.1047053510227.29  | <i>T. cruzi</i> | 41  | 270 | 310 |
| Tc00.1047053510227.29  | <i>T. cruzi</i> | 41  | 270 | 310 |
| Tc00.1047053510231.20  | <i>T. cruzi</i> | 44  | 174 | 217 |
| Tc00.1047053510231.20  | <i>T. cruzi</i> | 110 | 366 | 475 |
| Tc00.1047053510231.20  | <i>T. cruzi</i> | 57  | 604 | 660 |
| Tc00.1047053510231.29  | <i>T. cruzi</i> | 56  | 177 | 232 |
| Tc00.1047053510231.29  | <i>T. cruzi</i> | 45  | 594 | 638 |
| Tc00.1047053510231.29  | <i>T. cruzi</i> | 45  | 594 | 638 |
| Tc00.1047053510241.10  | <i>T. cruzi</i> | 278 | 194 | 471 |
| Tc00.1047053510241.10  | <i>T. cruzi</i> | 72  | 622 | 693 |
| Tc00.1047053510241.100 | <i>T. cruzi</i> | 52  | 129 | 180 |
| Tc00.1047053510241.110 | <i>T. cruzi</i> | 50  | 257 | 306 |
| Tc00.1047053510241.110 | <i>T. cruzi</i> | 213 | 450 | 662 |
| Tc00.1047053510241.120 | <i>T. cruzi</i> | 61  | 306 | 366 |
| Tc00.1047053510241.124 | <i>T. cruzi</i> | 146 | 1   | 146 |
| Tc00.1047053510241.124 | <i>T. cruzi</i> | 66  | 195 | 260 |
| Tc00.1047053510241.124 | <i>T. cruzi</i> | 232 | 271 | 502 |
| Tc00.1047053510241.20  | <i>T. cruzi</i> | 51  | 44  | 94  |
| Tc00.1047053510241.20  | <i>T. cruzi</i> | 57  | 170 | 226 |
| Tc00.1047053510241.20  | <i>T. cruzi</i> | 41  | 328 | 368 |
| Tc00.1047053510241.20  | <i>T. cruzi</i> | 59  | 481 | 539 |
| Tc00.1047053510241.40  | <i>T. cruzi</i> | 121 | 76  | 196 |
| Tc00.1047053510241.40  | <i>T. cruzi</i> | 278 | 326 | 603 |

|                        |                 |     |      |      |
|------------------------|-----------------|-----|------|------|
| Tc00.1047053510241.60  | <i>T. cruzi</i> | 46  | 1    | 46   |
| Tc00.1047053510241.60  | <i>T. cruzi</i> | 70  | 89   | 158  |
| Tc00.1047053510241.70  | <i>T. cruzi</i> | 42  | 410  | 451  |
| Tc00.1047053510241.90  | <i>T. cruzi</i> | 53  | 24   | 76   |
| Tc00.1047053510241.90  | <i>T. cruzi</i> | 181 | 400  | 580  |
| Tc00.1047053510241.90  | <i>T. cruzi</i> | 83  | 582  | 664  |
| Tc00.1047053510243.100 | <i>T. cruzi</i> | 41  | 17   | 57   |
| Tc00.1047053510243.100 | <i>T. cruzi</i> | 44  | 677  | 720  |
| Tc00.1047053510243.100 | <i>T. cruzi</i> | 66  | 902  | 967  |
| Tc00.1047053510243.110 | <i>T. cruzi</i> | 212 | 1    | 212  |
| Tc00.1047053510243.128 | <i>T. cruzi</i> | 60  | 1    | 60   |
| Tc00.1047053510243.20  | <i>T. cruzi</i> | 65  | 25   | 89   |
| Tc00.1047053510243.20  | <i>T. cruzi</i> | 134 | 205  | 338  |
| Tc00.1047053510243.20  | <i>T. cruzi</i> | 267 | 349  | 615  |
| Tc00.1047053510243.30  | <i>T. cruzi</i> | 131 | 79   | 209  |
| Tc00.1047053510243.30  | <i>T. cruzi</i> | 93  | 241  | 333  |
| Tc00.1047053510243.30  | <i>T. cruzi</i> | 93  | 241  | 333  |
| Tc00.1047053510243.54  | <i>T. cruzi</i> | 45  | 18   | 62   |
| Tc00.1047053510243.54  | <i>T. cruzi</i> | 48  | 231  | 278  |
| Tc00.1047053510243.54  | <i>T. cruzi</i> | 48  | 231  | 278  |
| Tc00.1047053510243.60  | <i>T. cruzi</i> | 134 | 29   | 162  |
| Tc00.1047053510243.60  | <i>T. cruzi</i> | 136 | 319  | 454  |
| Tc00.1047053510243.70  | <i>T. cruzi</i> | 52  | 80   | 131  |
| Tc00.1047053510243.70  | <i>T. cruzi</i> | 58  | 418  | 475  |
| Tc00.1047053510243.70  | <i>T. cruzi</i> | 54  | 525  | 578  |
| Tc00.1047053510243.80  | <i>T. cruzi</i> | 177 | 66   | 242  |
| Tc00.1047053510247.10  | <i>T. cruzi</i> | 121 | 1    | 121  |
| Tc00.1047053510247.10  | <i>T. cruzi</i> | 214 | 124  | 337  |
| Tc00.1047053510247.10  | <i>T. cruzi</i> | 147 | 348  | 494  |
| Tc00.1047053510247.10  | <i>T. cruzi</i> | 685 | 497  | 1181 |
| Tc00.1047053510247.10  | <i>T. cruzi</i> | 121 | 1218 | 1338 |
| Tc00.1047053510247.10  | <i>T. cruzi</i> | 245 | 1353 | 1597 |
| Tc00.1047053510251.19  | <i>T. cruzi</i> | 65  | 1    | 65   |
| Tc00.1047053510251.19  | <i>T. cruzi</i> | 43  | 507  | 549  |
| Tc00.1047053510251.19  | <i>T. cruzi</i> | 130 | 849  | 978  |
| Tc00.1047053510253.20  | <i>T. cruzi</i> | 117 | 175  | 291  |
| Tc00.1047053510253.29  | <i>T. cruzi</i> | 70  | 126  | 195  |
| Tc00.1047053510255.20  | <i>T. cruzi</i> | 79  | 1    | 79   |
| Tc00.1047053510257.100 | <i>T. cruzi</i> | 52  | 830  | 881  |
| Tc00.1047053510257.120 | <i>T. cruzi</i> | 45  | 1    | 45   |
| Tc00.1047053510257.24  | <i>T. cruzi</i> | 58  | 91   | 148  |
| Tc00.1047053510257.40  | <i>T. cruzi</i> | 42  | 178  | 219  |
| Tc00.1047053510257.40  | <i>T. cruzi</i> | 51  | 305  | 355  |
| Tc00.1047053510257.40  | <i>T. cruzi</i> | 51  | 305  | 355  |
| Tc00.1047053510257.70  | <i>T. cruzi</i> | 115 | 1    | 115  |
| Tc00.1047053510259.50  | <i>T. cruzi</i> | 42  | 94   | 135  |
| Tc00.1047053510261.10  | <i>T. cruzi</i> | 311 | 23   | 333  |

|                        |                 |     |      |      |
|------------------------|-----------------|-----|------|------|
| Tc00.1047053510261.21  | <i>T. cruzi</i> | 49  | 100  | 148  |
| Tc00.1047053510261.21  | <i>T. cruzi</i> | 47  | 188  | 234  |
| Tc00.1047053510261.21  | <i>T. cruzi</i> | 47  | 188  | 234  |
| Tc00.1047053510263.30  | <i>T. cruzi</i> | 50  | 248  | 297  |
| Tc00.1047053510269.20  | <i>T. cruzi</i> | 370 | 56   | 425  |
| Tc00.1047053510269.40  | <i>T. cruzi</i> | 147 | 53   | 199  |
| Tc00.1047053510269.50  | <i>T. cruzi</i> | 306 | 26   | 331  |
| Tc00.1047053510275.120 | <i>T. cruzi</i> | 86  | 1    | 86   |
| Tc00.1047053510275.130 | <i>T. cruzi</i> | 53  | 229  | 281  |
| Tc00.1047053510275.130 | <i>T. cruzi</i> | 50  | 1619 | 1668 |
| Tc00.1047053510275.130 | <i>T. cruzi</i> | 71  | 2854 | 2924 |
| Tc00.1047053510275.130 | <i>T. cruzi</i> | 82  | 3401 | 3482 |
| Tc00.1047053510275.190 | <i>T. cruzi</i> | 295 | 24   | 318  |
| Tc00.1047053510275.219 | <i>T. cruzi</i> | 135 | 27   | 161  |
| Tc00.1047053510275.250 | <i>T. cruzi</i> | 313 | 33   | 345  |
| Tc00.1047053510275.29  | <i>T. cruzi</i> | 86  | 1    | 86   |
| Tc00.1047053510275.330 | <i>T. cruzi</i> | 137 | 27   | 163  |
| Tc00.1047053510275.350 | <i>T. cruzi</i> | 44  | 1    | 44   |
| Tc00.1047053510275.350 | <i>T. cruzi</i> | 48  | 106  | 153  |
| Tc00.1047053510275.350 | <i>T. cruzi</i> | 50  | 291  | 340  |
| Tc00.1047053510275.350 | <i>T. cruzi</i> | 42  | 412  | 453  |
| Tc00.1047053510275.350 | <i>T. cruzi</i> | 164 | 710  | 873  |
| Tc00.1047053510275.355 | <i>T. cruzi</i> | 51  | 73   | 123  |
| Tc00.1047053510275.355 | <i>T. cruzi</i> | 49  | 187  | 235  |
| Tc00.1047053510275.355 | <i>T. cruzi</i> | 49  | 187  | 235  |
| Tc00.1047053510275.370 | <i>T. cruzi</i> | 322 | 22   | 343  |
| Tc00.1047053510275.400 | <i>T. cruzi</i> | 383 | 57   | 439  |
| Tc00.1047053510275.410 | <i>T. cruzi</i> | 111 | 59   | 169  |
| Tc00.1047053510275.50  | <i>T. cruzi</i> | 164 | 18   | 181  |
| Tc00.1047053510275.60  | <i>T. cruzi</i> | 329 | 30   | 358  |
| Tc00.1047053510279.100 | <i>T. cruzi</i> | 41  | 45   | 85   |
| Tc00.1047053510279.100 | <i>T. cruzi</i> | 113 | 244  | 356  |
| Tc00.1047053510279.110 | <i>T. cruzi</i> | 43  | 1    | 43   |
| Tc00.1047053510279.110 | <i>T. cruzi</i> | 41  | 124  | 164  |
| Tc00.1047053510279.110 | <i>T. cruzi</i> | 127 | 205  | 331  |
| Tc00.1047053510279.110 | <i>T. cruzi</i> | 48  | 403  | 450  |
| Tc00.1047053510279.110 | <i>T. cruzi</i> | 210 | 714  | 923  |
| Tc00.1047053510279.120 | <i>T. cruzi</i> | 295 | 25   | 319  |
| Tc00.1047053510279.130 | <i>T. cruzi</i> | 165 | 23   | 187  |
| Tc00.1047053510279.140 | <i>T. cruzi</i> | 317 | 24   | 340  |
| Tc00.1047053510279.190 | <i>T. cruzi</i> | 433 | 34   | 466  |
| Tc00.1047053510279.210 | <i>T. cruzi</i> | 341 | 78   | 418  |
| Tc00.1047053510279.230 | <i>T. cruzi</i> | 48  | 1    | 48   |
| Tc00.1047053510279.230 | <i>T. cruzi</i> | 45  | 134  | 178  |
| Tc00.1047053510279.230 | <i>T. cruzi</i> | 47  | 313  | 359  |
| Tc00.1047053510279.230 | <i>T. cruzi</i> | 219 | 728  | 946  |
| Tc00.1047053510279.250 | <i>T. cruzi</i> | 201 | 105  | 305  |

|                        |                 |     |     |      |
|------------------------|-----------------|-----|-----|------|
| Tc00.1047053510279.30  | <i>T. cruzi</i> | 109 | 122 | 230  |
| Tc00.1047053510279.310 | <i>T. cruzi</i> | 442 | 30  | 471  |
| Tc00.1047053510279.320 | <i>T. cruzi</i> | 46  | 1   | 46   |
| Tc00.1047053510279.320 | <i>T. cruzi</i> | 47  | 130 | 176  |
| Tc00.1047053510279.320 | <i>T. cruzi</i> | 81  | 269 | 349  |
| Tc00.1047053510279.320 | <i>T. cruzi</i> | 162 | 726 | 887  |
| Tc00.1047053510279.330 | <i>T. cruzi</i> | 399 | 76  | 474  |
| Tc00.1047053510279.340 | <i>T. cruzi</i> | 158 | 30  | 187  |
| Tc00.1047053510279.40  | <i>T. cruzi</i> | 196 | 123 | 318  |
| Tc00.1047053510279.60  | <i>T. cruzi</i> | 294 | 31  | 324  |
| Tc00.1047053510279.70  | <i>T. cruzi</i> | 72  | 62  | 133  |
| Tc00.1047053510281.10  | <i>T. cruzi</i> | 147 | 89  | 235  |
| Tc00.1047053510281.20  | <i>T. cruzi</i> | 61  | 251 | 311  |
| Tc00.1047053510281.20  | <i>T. cruzi</i> | 140 | 546 | 685  |
| Tc00.1047053510283.120 | <i>T. cruzi</i> | 123 | 88  | 210  |
| Tc00.1047053510283.120 | <i>T. cruzi</i> | 55  | 256 | 310  |
| Tc00.1047053510283.120 | <i>T. cruzi</i> | 221 | 342 | 562  |
| Tc00.1047053510283.130 | <i>T. cruzi</i> | 152 | 1   | 152  |
| Tc00.1047053510283.130 | <i>T. cruzi</i> | 129 | 162 | 290  |
| Tc00.1047053510283.150 | <i>T. cruzi</i> | 117 | 234 | 350  |
| Tc00.1047053510283.160 | <i>T. cruzi</i> | 130 | 208 | 337  |
| Tc00.1047053510283.20  | <i>T. cruzi</i> | 94  | 1   | 94   |
| Tc00.1047053510283.30  | <i>T. cruzi</i> | 94  | 1   | 94   |
| Tc00.1047053510283.50  | <i>T. cruzi</i> | 54  | 205 | 258  |
| Tc00.1047053510283.60  | <i>T. cruzi</i> | 87  | 1   | 87   |
| Tc00.1047053510283.60  | <i>T. cruzi</i> | 167 | 160 | 326  |
| Tc00.1047053510283.60  | <i>T. cruzi</i> | 71  | 366 | 436  |
| Tc00.1047053510283.70  | <i>T. cruzi</i> | 68  | 174 | 241  |
| Tc00.1047053510283.80  | <i>T. cruzi</i> | 84  | 283 | 366  |
| Tc00.1047053510283.90  | <i>T. cruzi</i> | 42  | 1   | 42   |
| Tc00.1047053510283.90  | <i>T. cruzi</i> | 50  | 237 | 286  |
| Tc00.1047053510283.90  | <i>T. cruzi</i> | 85  | 386 | 470  |
| Tc00.1047053510285.100 | <i>T. cruzi</i> | 149 | 289 | 437  |
| Tc00.1047053510285.110 | <i>T. cruzi</i> | 50  | 1   | 50   |
| Tc00.1047053510285.110 | <i>T. cruzi</i> | 44  | 296 | 339  |
| Tc00.1047053510285.110 | <i>T. cruzi</i> | 44  | 296 | 339  |
| Tc00.1047053510285.120 | <i>T. cruzi</i> | 68  | 721 | 788  |
| Tc00.1047053510285.130 | <i>T. cruzi</i> | 69  | 364 | 432  |
| Tc00.1047053510285.20  | <i>T. cruzi</i> | 79  | 674 | 752  |
| Tc00.1047053510285.30  | <i>T. cruzi</i> | 95  | 1   | 95   |
| Tc00.1047053510285.30  | <i>T. cruzi</i> | 209 | 212 | 420  |
| Tc00.1047053510285.30  | <i>T. cruzi</i> | 119 | 444 | 562  |
| Tc00.1047053510285.40  | <i>T. cruzi</i> | 48  | 437 | 484  |
| Tc00.1047053510285.70  | <i>T. cruzi</i> | 68  | 1   | 68   |
| Tc00.1047053510285.70  | <i>T. cruzi</i> | 51  | 401 | 451  |
| Tc00.1047053510285.70  | <i>T. cruzi</i> | 91  | 485 | 575  |
| Tc00.1047053510285.70  | <i>T. cruzi</i> | 375 | 681 | 1055 |

|                        |                 |     |      |      |
|------------------------|-----------------|-----|------|------|
| Tc00.1047053510285.74  | <i>T. cruzi</i> | 67  | 1    | 67   |
| Tc00.1047053510285.74  | <i>T. cruzi</i> | 119 | 69   | 187  |
| Tc00.1047053510285.80  | <i>T. cruzi</i> | 180 | 1    | 180  |
| Tc00.1047053510285.80  | <i>T. cruzi</i> | 106 | 208  | 313  |
| Tc00.1047053510285.80  | <i>T. cruzi</i> | 260 | 394  | 653  |
| Tc00.1047053510285.80  | <i>T. cruzi</i> | 67  | 659  | 725  |
| Tc00.1047053510285.80  | <i>T. cruzi</i> | 113 | 739  | 851  |
| Tc00.1047053510285.90  | <i>T. cruzi</i> | 52  | 701  | 752  |
| Tc00.1047053510287.40  | <i>T. cruzi</i> | 43  | 119  | 161  |
| Tc00.1047053510287.40  | <i>T. cruzi</i> | 45  | 264  | 308  |
| Tc00.1047053510287.40  | <i>T. cruzi</i> | 45  | 264  | 308  |
| Tc00.1047053510287.50  | <i>T. cruzi</i> | 42  | 1    | 42   |
| Tc00.1047053510287.60  | <i>T. cruzi</i> | 48  | 71   | 118  |
| Tc00.1047053510289.10  | <i>T. cruzi</i> | 60  | 1    | 60   |
| Tc00.1047053510289.20  | <i>T. cruzi</i> | 55  | 63   | 117  |
| Tc00.1047053510289.30  | <i>T. cruzi</i> | 49  | 1    | 49   |
| Tc00.1047053510289.40  | <i>T. cruzi</i> | 44  | 169  | 212  |
| Tc00.1047053510289.44  | <i>T. cruzi</i> | 132 | 1    | 132  |
| Tc00.1047053510289.50  | <i>T. cruzi</i> | 88  | 1    | 88   |
| Tc00.1047053510289.50  | <i>T. cruzi</i> | 109 | 243  | 351  |
| Tc00.1047053510289.70  | <i>T. cruzi</i> | 58  | 44   | 101  |
| Tc00.1047053510289.70  | <i>T. cruzi</i> | 52  | 103  | 154  |
| Tc00.1047053510289.70  | <i>T. cruzi</i> | 49  | 253  | 301  |
| Tc00.1047053510289.90  | <i>T. cruzi</i> | 46  | 45   | 90   |
| Tc00.1047053510291.20  | <i>T. cruzi</i> | 70  | 53   | 122  |
| Tc00.1047053510291.20  | <i>T. cruzi</i> | 57  | 369  | 425  |
| Tc00.1047053510291.20  | <i>T. cruzi</i> | 57  | 369  | 425  |
| Tc00.1047053510293.20  | <i>T. cruzi</i> | 50  | 346  | 395  |
| Tc00.1047053510293.40  | <i>T. cruzi</i> | 52  | 127  | 178  |
| Tc00.1047053510293.50  | <i>T. cruzi</i> | 185 | 1    | 185  |
| Tc00.1047053510295.10  | <i>T. cruzi</i> | 41  | 177  | 217  |
| Tc00.1047053510295.15  | <i>T. cruzi</i> | 44  | 137  | 180  |
| Tc00.1047053510295.15  | <i>T. cruzi</i> | 125 | 198  | 322  |
| Tc00.1047053510295.15  | <i>T. cruzi</i> | 125 | 198  | 322  |
| Tc00.1047053510295.40  | <i>T. cruzi</i> | 102 | 127  | 228  |
| Tc00.1047053510295.50  | <i>T. cruzi</i> | 146 | 308  | 453  |
| Tc00.1047053510295.59  | <i>T. cruzi</i> | 57  | 1    | 57   |
| Tc00.1047053510297.110 | <i>T. cruzi</i> | 58  | 1    | 58   |
| Tc00.1047053510297.110 | <i>T. cruzi</i> | 96  | 563  | 658  |
| Tc00.1047053510297.110 | <i>T. cruzi</i> | 139 | 750  | 888  |
| Tc00.1047053510297.110 | <i>T. cruzi</i> | 53  | 1312 | 1364 |
| Tc00.1047053510297.110 | <i>T. cruzi</i> | 41  | 1481 | 1521 |
| Tc00.1047053510297.20  | <i>T. cruzi</i> | 51  | 77   | 127  |
| Tc00.1047053510297.20  | <i>T. cruzi</i> | 55  | 279  | 333  |
| Tc00.1047053510297.20  | <i>T. cruzi</i> | 53  | 1029 | 1081 |
| Tc00.1047053510297.30  | <i>T. cruzi</i> | 262 | 65   | 326  |
| Tc00.1047053510297.30  | <i>T. cruzi</i> | 149 | 340  | 488  |

|                        |                 |     |      |      |
|------------------------|-----------------|-----|------|------|
| Tc00.1047053510297.30  | <i>T. cruzi</i> | 78  | 820  | 897  |
| Tc00.1047053510297.40  | <i>T. cruzi</i> | 94  | 1    | 94   |
| Tc00.1047053510297.40  | <i>T. cruzi</i> | 206 | 125  | 330  |
| Tc00.1047053510297.50  | <i>T. cruzi</i> | 125 | 92   | 216  |
| Tc00.1047053510297.50  | <i>T. cruzi</i> | 114 | 252  | 365  |
| Tc00.1047053510297.50  | <i>T. cruzi</i> | 47  | 377  | 423  |
| Tc00.1047053510297.60  | <i>T. cruzi</i> | 56  | 173  | 228  |
| Tc00.1047053510297.70  | <i>T. cruzi</i> | 86  | 1    | 86   |
| Tc00.1047053510297.70  | <i>T. cruzi</i> | 137 | 194  | 330  |
| Tc00.1047053510297.70  | <i>T. cruzi</i> | 43  | 339  | 381  |
| Tc00.1047053510307.10  | <i>T. cruzi</i> | 185 | 611  | 795  |
| Tc00.1047053510307.200 | <i>T. cruzi</i> | 98  | 91   | 188  |
| Tc00.1047053510307.220 | <i>T. cruzi</i> | 58  | 1    | 58   |
| Tc00.1047053510307.230 | <i>T. cruzi</i> | 42  | 1    | 42   |
| Tc00.1047053510307.230 | <i>T. cruzi</i> | 44  | 230  | 273  |
| Tc00.1047053510307.230 | <i>T. cruzi</i> | 44  | 230  | 273  |
| Tc00.1047053510307.240 | <i>T. cruzi</i> | 45  | 1    | 45   |
| Tc00.1047053510307.240 | <i>T. cruzi</i> | 295 | 717  | 1011 |
| Tc00.1047053510307.284 | <i>T. cruzi</i> | 42  | 1    | 42   |
| Tc00.1047053510307.284 | <i>T. cruzi</i> | 453 | 681  | 1133 |
| Tc00.1047053510307.330 | <i>T. cruzi</i> | 57  | 1621 | 1677 |
| Tc00.1047053510307.330 | <i>T. cruzi</i> | 77  | 2861 | 2937 |
| Tc00.1047053510307.330 | <i>T. cruzi</i> | 75  | 3413 | 3487 |
| Tc00.1047053510309.20  | <i>T. cruzi</i> | 74  | 280  | 353  |
| Tc00.1047053510309.30  | <i>T. cruzi</i> | 77  | 701  | 777  |
| Tc00.1047053510309.40  | <i>T. cruzi</i> | 55  | 61   | 115  |
| Tc00.1047053510309.50  | <i>T. cruzi</i> | 55  | 61   | 115  |
| Tc00.1047053510309.60  | <i>T. cruzi</i> | 61  | 639  | 699  |
| Tc00.1047053510309.60  | <i>T. cruzi</i> | 72  | 847  | 918  |
| Tc00.1047053510309.60  | <i>T. cruzi</i> | 72  | 847  | 918  |
| Tc00.1047053510309.70  | <i>T. cruzi</i> | 60  | 1    | 60   |
| Tc00.1047053510309.70  | <i>T. cruzi</i> | 107 | 81   | 187  |
| Tc00.1047053510309.70  | <i>T. cruzi</i> | 107 | 195  | 301  |
| Tc00.1047053510311.100 | <i>T. cruzi</i> | 80  | 31   | 110  |
| Tc00.1047053510311.100 | <i>T. cruzi</i> | 62  | 113  | 174  |
| Tc00.1047053510311.100 | <i>T. cruzi</i> | 43  | 327  | 369  |
| Tc00.1047053510311.110 | <i>T. cruzi</i> | 82  | 103  | 184  |
| Tc00.1047053510311.130 | <i>T. cruzi</i> | 114 | 60   | 173  |
| Tc00.1047053510311.130 | <i>T. cruzi</i> | 57  | 179  | 235  |
| Tc00.1047053510311.130 | <i>T. cruzi</i> | 47  | 273  | 319  |
| Tc00.1047053510311.140 | <i>T. cruzi</i> | 65  | 1    | 65   |
| Tc00.1047053510311.150 | <i>T. cruzi</i> | 49  | 303  | 351  |
| Tc00.1047053510311.160 | <i>T. cruzi</i> | 45  | 65   | 109  |
| Tc00.1047053510311.160 | <i>T. cruzi</i> | 41  | 182  | 222  |
| Tc00.1047053510311.160 | <i>T. cruzi</i> | 41  | 182  | 222  |
| Tc00.1047053510311.180 | <i>T. cruzi</i> | 43  | 1    | 43   |
| Tc00.1047053510311.180 | <i>T. cruzi</i> | 78  | 262  | 339  |

|                        |                 |     |      |      |
|------------------------|-----------------|-----|------|------|
| Tc00.1047053510311.180 | <i>T. cruzi</i> | 42  | 481  | 522  |
| Tc00.1047053510311.30  | <i>T. cruzi</i> | 93  | 1    | 93   |
| Tc00.1047053510311.30  | <i>T. cruzi</i> | 63  | 109  | 171  |
| Tc00.1047053510311.30  | <i>T. cruzi</i> | 155 | 226  | 380  |
| Tc00.1047053510311.40  | <i>T. cruzi</i> | 64  | 1    | 64   |
| Tc00.1047053510311.40  | <i>T. cruzi</i> | 70  | 115  | 184  |
| Tc00.1047053510311.40  | <i>T. cruzi</i> | 70  | 115  | 184  |
| Tc00.1047053510311.50  | <i>T. cruzi</i> | 346 | 1    | 346  |
| Tc00.1047053510311.50  | <i>T. cruzi</i> | 94  | 660  | 753  |
| Tc00.1047053510311.60  | <i>T. cruzi</i> | 132 | 29   | 160  |
| Tc00.1047053510311.60  | <i>T. cruzi</i> | 89  | 219  | 307  |
| Tc00.1047053510311.60  | <i>T. cruzi</i> | 64  | 968  | 1031 |
| Tc00.1047053510311.60  | <i>T. cruzi</i> | 93  | 1351 | 1443 |
| Tc00.1047053510311.60  | <i>T. cruzi</i> | 41  | 1617 | 1657 |
| Tc00.1047053510311.70  | <i>T. cruzi</i> | 52  | 1    | 52   |
| Tc00.1047053510311.80  | <i>T. cruzi</i> | 90  | 306  | 395  |
| Tc00.1047053510317.20  | <i>T. cruzi</i> | 65  | 23   | 87   |
| Tc00.1047053510317.20  | <i>T. cruzi</i> | 57  | 129  | 185  |
| Tc00.1047053510317.20  | <i>T. cruzi</i> | 40  | 438  | 477  |
| Tc00.1047053510317.20  | <i>T. cruzi</i> | 42  | 572  | 613  |
| Tc00.1047053510317.20  | <i>T. cruzi</i> | 95  | 650  | 744  |
| Tc00.1047053510317.40  | <i>T. cruzi</i> | 57  | 1    | 57   |
| Tc00.1047053510317.40  | <i>T. cruzi</i> | 93  | 162  | 254  |
| Tc00.1047053510317.40  | <i>T. cruzi</i> | 51  | 264  | 314  |
| Tc00.1047053510317.40  | <i>T. cruzi</i> | 42  | 467  | 508  |
| Tc00.1047053510317.40  | <i>T. cruzi</i> | 41  | 515  | 555  |
| Tc00.1047053510317.7   | <i>T. cruzi</i> | 69  | 104  | 172  |
| Tc00.1047053510317.7   | <i>T. cruzi</i> | 74  | 270  | 343  |
| Tc00.1047053510317.7   | <i>T. cruzi</i> | 40  | 382  | 421  |
| Tc00.1047053510317.7   | <i>T. cruzi</i> | 113 | 464  | 576  |
| Tc00.1047053510317.7   | <i>T. cruzi</i> | 138 | 607  | 744  |
| Tc00.1047053510317.7   | <i>T. cruzi</i> | 58  | 797  | 854  |
| Tc00.1047053510317.7   | <i>T. cruzi</i> | 247 | 988  | 1234 |
| Tc00.1047053510319.9   | <i>T. cruzi</i> | 344 | 81   | 424  |
| Tc00.1047053510323.110 | <i>T. cruzi</i> | 74  | 1    | 74   |
| Tc00.1047053510323.110 | <i>T. cruzi</i> | 64  | 80   | 143  |
| Tc00.1047053510323.110 | <i>T. cruzi</i> | 64  | 80   | 143  |
| Tc00.1047053510323.20  | <i>T. cruzi</i> | 253 | 1    | 253  |
| Tc00.1047053510323.20  | <i>T. cruzi</i> | 519 | 289  | 807  |
| Tc00.1047053510323.20  | <i>T. cruzi</i> | 169 | 814  | 982  |
| Tc00.1047053510323.30  | <i>T. cruzi</i> | 80  | 1    | 80   |
| Tc00.1047053510323.30  | <i>T. cruzi</i> | 82  | 137  | 218  |
| Tc00.1047053510323.30  | <i>T. cruzi</i> | 82  | 137  | 218  |
| Tc00.1047053510323.4   | <i>T. cruzi</i> | 72  | 46   | 117  |
| Tc00.1047053510323.40  | <i>T. cruzi</i> | 76  | 67   | 142  |
| Tc00.1047053510323.50  | <i>T. cruzi</i> | 71  | 1    | 71   |
| Tc00.1047053510323.70  | <i>T. cruzi</i> | 199 | 52   | 250  |

|                        |                 |     |      |      |
|------------------------|-----------------|-----|------|------|
| Tc00.1047053510323.70  | <i>T. cruzi</i> | 345 | 283  | 627  |
| Tc00.1047053510325.20  | <i>T. cruzi</i> | 109 | 107  | 215  |
| Tc00.1047053510325.45  | <i>T. cruzi</i> | 176 | 45   | 220  |
| Tc00.1047053510325.45  | <i>T. cruzi</i> | 49  | 356  | 404  |
| Tc00.1047053510325.50  | <i>T. cruzi</i> | 47  | 1    | 47   |
| Tc00.1047053510325.60  | <i>T. cruzi</i> | 186 | 1    | 186  |
| Tc00.1047053510343.10  | <i>T. cruzi</i> | 42  | 55   | 96   |
| Tc00.1047053510343.10  | <i>T. cruzi</i> | 99  | 153  | 251  |
| Tc00.1047053510343.10  | <i>T. cruzi</i> | 99  | 153  | 251  |
| Tc00.1047053510343.5   | <i>T. cruzi</i> | 83  | 51   | 133  |
| Tc00.1047053510343.5   | <i>T. cruzi</i> | 46  | 224  | 269  |
| Tc00.1047053510343.5   | <i>T. cruzi</i> | 46  | 224  | 269  |
| Tc00.1047053510345.20  | <i>T. cruzi</i> | 182 | 1    | 182  |
| Tc00.1047053510345.30  | <i>T. cruzi</i> | 40  | 1    | 40   |
| Tc00.1047053510345.50  | <i>T. cruzi</i> | 48  | 98   | 145  |
| Tc00.1047053510345.50  | <i>T. cruzi</i> | 53  | 170  | 222  |
| Tc00.1047053510345.50  | <i>T. cruzi</i> | 53  | 170  | 222  |
| Tc00.1047053510347.10  | <i>T. cruzi</i> | 70  | 321  | 390  |
| Tc00.1047053510347.40  | <i>T. cruzi</i> | 55  | 23   | 77   |
| Tc00.1047053510347.50  | <i>T. cruzi</i> | 145 | 75   | 219  |
| Tc00.1047053510347.50  | <i>T. cruzi</i> | 73  | 382  | 454  |
| Tc00.1047053510349.20  | <i>T. cruzi</i> | 46  | 168  | 213  |
| Tc00.1047053510349.30  | <i>T. cruzi</i> | 107 | 305  | 411  |
| Tc00.1047053510349.40  | <i>T. cruzi</i> | 86  | 1    | 86   |
| Tc00.1047053510349.40  | <i>T. cruzi</i> | 45  | 152  | 196  |
| Tc00.1047053510349.40  | <i>T. cruzi</i> | 297 | 232  | 528  |
| Tc00.1047053510349.40  | <i>T. cruzi</i> | 243 | 554  | 796  |
| Tc00.1047053510349.40  | <i>T. cruzi</i> | 388 | 819  | 1206 |
| Tc00.1047053510349.40  | <i>T. cruzi</i> | 71  | 1215 | 1285 |
| Tc00.1047053510349.40  | <i>T. cruzi</i> | 44  | 1347 | 1390 |
| Tc00.1047053510349.64  | <i>T. cruzi</i> | 43  | 1    | 43   |
| Tc00.1047053510349.70  | <i>T. cruzi</i> | 53  | 96   | 148  |
| Tc00.1047053510349.70  | <i>T. cruzi</i> | 83  | 157  | 239  |
| Tc00.1047053510349.70  | <i>T. cruzi</i> | 83  | 157  | 239  |
| Tc00.1047053510349.80  | <i>T. cruzi</i> | 151 | 304  | 454  |
| Tc00.1047053510351.100 | <i>T. cruzi</i> | 59  | 1    | 59   |
| Tc00.1047053510351.100 | <i>T. cruzi</i> | 526 | 77   | 602  |
| Tc00.1047053510351.110 | <i>T. cruzi</i> | 56  | 1    | 56   |
| Tc00.1047053510351.110 | <i>T. cruzi</i> | 60  | 74   | 133  |
| Tc00.1047053510351.110 | <i>T. cruzi</i> | 122 | 156  | 277  |
| Tc00.1047053510351.110 | <i>T. cruzi</i> | 186 | 298  | 483  |
| Tc00.1047053510351.140 | <i>T. cruzi</i> | 47  | 22   | 68   |
| Tc00.1047053510351.140 | <i>T. cruzi</i> | 47  | 77   | 123  |
| Tc00.1047053510351.140 | <i>T. cruzi</i> | 47  | 77   | 123  |
| Tc00.1047053510351.40  | <i>T. cruzi</i> | 83  | 51   | 133  |
| Tc00.1047053510351.40  | <i>T. cruzi</i> | 315 | 581  | 895  |
| Tc00.1047053510351.50  | <i>T. cruzi</i> | 166 | 1    | 166  |



|                        |                 |     |      |      |
|------------------------|-----------------|-----|------|------|
| Tc00.1047053510351.60  | <i>T. cruzi</i> | 42  | 169  | 210  |
| Tc00.1047053510351.60  | <i>T. cruzi</i> | 45  | 258  | 302  |
| Tc00.1047053510351.60  | <i>T. cruzi</i> | 45  | 258  | 302  |
| Tc00.1047053510351.70  | <i>T. cruzi</i> | 54  | 1    | 54   |
| Tc00.1047053510351.70  | <i>T. cruzi</i> | 123 | 246  | 368  |
| Tc00.1047053510351.70  | <i>T. cruzi</i> | 68  | 582  | 649  |
| Tc00.1047053510351.70  | <i>T. cruzi</i> | 60  | 716  | 775  |
| Tc00.1047053510351.80  | <i>T. cruzi</i> | 63  | 1    | 63   |
| Tc00.1047053510351.80  | <i>T. cruzi</i> | 64  | 197  | 260  |
| Tc00.1047053510351.90  | <i>T. cruzi</i> | 67  | 103  | 169  |
| Tc00.1047053510353.10  | <i>T. cruzi</i> | 153 | 623  | 775  |
| Tc00.1047053510353.20  | <i>T. cruzi</i> | 97  | 71   | 167  |
| Tc00.1047053510353.20  | <i>T. cruzi</i> | 103 | 183  | 285  |
| Tc00.1047053510353.20  | <i>T. cruzi</i> | 43  | 371  | 413  |
| Tc00.1047053510353.20  | <i>T. cruzi</i> | 66  | 781  | 846  |
| Tc00.1047053510353.30  | <i>T. cruzi</i> | 286 | 1    | 286  |
| Tc00.1047053510353.30  | <i>T. cruzi</i> | 127 | 313  | 439  |
| Tc00.1047053510353.30  | <i>T. cruzi</i> | 66  | 509  | 574  |
| Tc00.1047053510367.10  | <i>T. cruzi</i> | 55  | 1600 | 1654 |
| Tc00.1047053510367.10  | <i>T. cruzi</i> | 67  | 2841 | 2907 |
| Tc00.1047053510367.10  | <i>T. cruzi</i> | 84  | 3384 | 3467 |
| Tc00.1047053510369.10  | <i>T. cruzi</i> | 222 | 28   | 249  |
| Tc00.1047053510371.10  | <i>T. cruzi</i> | 450 | 53   | 502  |
| Tc00.1047053510371.100 | <i>T. cruzi</i> | 328 | 34   | 361  |
| Tc00.1047053510371.110 | <i>T. cruzi</i> | 157 | 33   | 189  |
| Tc00.1047053510371.120 | <i>T. cruzi</i> | 221 | 28   | 248  |
| Tc00.1047053510371.130 | <i>T. cruzi</i> | 183 | 18   | 200  |
| Tc00.1047053510371.40  | <i>T. cruzi</i> | 57  | 66   | 122  |
| Tc00.1047053510371.50  | <i>T. cruzi</i> | 246 | 26   | 271  |
| Tc00.1047053510371.70  | <i>T. cruzi</i> | 223 | 29   | 251  |
| Tc00.1047053510371.90  | <i>T. cruzi</i> | 44  | 1    | 44   |
| Tc00.1047053510371.90  | <i>T. cruzi</i> | 46  | 226  | 271  |
| Tc00.1047053510371.90  | <i>T. cruzi</i> | 51  | 284  | 334  |
| Tc00.1047053510371.90  | <i>T. cruzi</i> | 94  | 706  | 799  |
| Tc00.1047053510373.10  | <i>T. cruzi</i> | 311 | 28   | 338  |
| Tc00.1047053510373.20  | <i>T. cruzi</i> | 67  | 54   | 120  |
| Tc00.1047053510373.30  | <i>T. cruzi</i> | 249 | 117  | 365  |
| Tc00.1047053510373.40  | <i>T. cruzi</i> | 116 | 140  | 255  |
| Tc00.1047053510373.60  | <i>T. cruzi</i> | 496 | 53   | 548  |
| Tc00.1047053510373.70  | <i>T. cruzi</i> | 122 | 24   | 145  |
| Tc00.1047053510373.90  | <i>T. cruzi</i> | 249 | 25   | 273  |
| Tc00.1047053510375.10  | <i>T. cruzi</i> | 253 | 27   | 279  |
| Tc00.1047053510377.10  | <i>T. cruzi</i> | 93  | 1    | 93   |
| Tc00.1047053510377.10  | <i>T. cruzi</i> | 51  | 132  | 182  |
| Tc00.1047053510377.10  | <i>T. cruzi</i> | 58  | 290  | 347  |
| Tc00.1047053510377.100 | <i>T. cruzi</i> | 219 | 41   | 259  |
| Tc00.1047053510377.110 | <i>T. cruzi</i> | 66  | 35   | 100  |

|                        |                 |     |     |     |
|------------------------|-----------------|-----|-----|-----|
| Tc00.1047053510377.134 | <i>T. cruzi</i> | 400 | 47  | 446 |
| Tc00.1047053510377.150 | <i>T. cruzi</i> | 155 | 24  | 178 |
| Tc00.1047053510377.190 | <i>T. cruzi</i> | 148 | 22  | 169 |
| Tc00.1047053510377.200 | <i>T. cruzi</i> | 240 | 30  | 269 |
| Tc00.1047053510377.260 | <i>T. cruzi</i> | 217 | 87  | 303 |
| Tc00.1047053510377.330 | <i>T. cruzi</i> | 53  | 1   | 53  |
| Tc00.1047053510377.330 | <i>T. cruzi</i> | 56  | 298 | 353 |
| Tc00.1047053510377.330 | <i>T. cruzi</i> | 49  | 736 | 784 |
| Tc00.1047053510377.340 | <i>T. cruzi</i> | 165 | 1   | 165 |
| Tc00.1047053510377.340 | <i>T. cruzi</i> | 110 | 182 | 291 |
| Tc00.1047053510377.350 | <i>T. cruzi</i> | 409 | 26  | 434 |
| Tc00.1047053510377.370 | <i>T. cruzi</i> | 194 | 19  | 212 |
| Tc00.1047053510377.390 | <i>T. cruzi</i> | 223 | 27  | 249 |
| Tc00.1047053510377.400 | <i>T. cruzi</i> | 180 | 17  | 196 |
| Tc00.1047053510377.410 | <i>T. cruzi</i> | 173 | 22  | 194 |
| Tc00.1047053510377.420 | <i>T. cruzi</i> | 61  | 130 | 190 |
| Tc00.1047053510377.430 | <i>T. cruzi</i> | 351 | 74  | 424 |
| Tc00.1047053510377.439 | <i>T. cruzi</i> | 173 | 17  | 189 |
| Tc00.1047053510377.450 | <i>T. cruzi</i> | 256 | 28  | 283 |
| Tc00.1047053510377.50  | <i>T. cruzi</i> | 96  | 1   | 96  |
| Tc00.1047053510377.50  | <i>T. cruzi</i> | 54  | 131 | 184 |
| Tc00.1047053510377.50  | <i>T. cruzi</i> | 46  | 295 | 340 |
| Tc00.1047053510377.50  | <i>T. cruzi</i> | 44  | 414 | 457 |
| Tc00.1047053510377.70  | <i>T. cruzi</i> | 145 | 22  | 166 |
| Tc00.1047053510381.10  | <i>T. cruzi</i> | 46  | 382 | 427 |
| Tc00.1047053510381.30  | <i>T. cruzi</i> | 67  | 237 | 303 |
| Tc00.1047053510381.50  | <i>T. cruzi</i> | 92  | 49  | 140 |
| Tc00.1047053510381.50  | <i>T. cruzi</i> | 236 | 168 | 403 |
| Tc00.1047053510381.50  | <i>T. cruzi</i> | 236 | 168 | 403 |
| Tc00.1047053510403.30  | <i>T. cruzi</i> | 40  | 1   | 40  |
| Tc00.1047053510407.100 | <i>T. cruzi</i> | 159 | 20  | 178 |
| Tc00.1047053510407.40  | <i>T. cruzi</i> | 77  | 1   | 77  |
| Tc00.1047053510407.40  | <i>T. cruzi</i> | 96  | 89  | 184 |
| Tc00.1047053510407.70  | <i>T. cruzi</i> | 45  | 104 | 148 |
| Tc00.1047053510407.80  | <i>T. cruzi</i> | 59  | 62  | 120 |
| Tc00.1047053510407.80  | <i>T. cruzi</i> | 89  | 437 | 525 |
| Tc00.1047053510407.80  | <i>T. cruzi</i> | 89  | 437 | 525 |
| Tc00.1047053510407.9   | <i>T. cruzi</i> | 103 | 314 | 416 |
| Tc00.1047053510407.9   | <i>T. cruzi</i> | 169 | 428 | 596 |
| Tc00.1047053510409.10  | <i>T. cruzi</i> | 189 | 26  | 214 |
| Tc00.1047053510409.10  | <i>T. cruzi</i> | 71  | 477 | 547 |
| Tc00.1047053510409.30  | <i>T. cruzi</i> | 77  | 73  | 149 |
| Tc00.1047053510409.30  | <i>T. cruzi</i> | 40  | 253 | 292 |
| Tc00.1047053510409.30  | <i>T. cruzi</i> | 49  | 510 | 558 |
| Tc00.1047053510409.39  | <i>T. cruzi</i> | 52  | 66  | 117 |
| Tc00.1047053510409.50  | <i>T. cruzi</i> | 106 | 132 | 237 |
| Tc00.1047053510409.50  | <i>T. cruzi</i> | 85  | 279 | 363 |

|                        |                 |     |      |      |
|------------------------|-----------------|-----|------|------|
| Tc00.1047053510409.60  | <i>T. cruzi</i> | 66  | 80   | 145  |
| Tc00.1047053510427.10  | <i>T. cruzi</i> | 97  | 107  | 203  |
| Tc00.1047053510429.30  | <i>T. cruzi</i> | 46  | 98   | 143  |
| Tc00.1047053510429.59  | <i>T. cruzi</i> | 57  | 1    | 57   |
| Tc00.1047053510431.110 | <i>T. cruzi</i> | 90  | 383  | 472  |
| Tc00.1047053510431.130 | <i>T. cruzi</i> | 45  | 162  | 206  |
| Tc00.1047053510431.160 | <i>T. cruzi</i> | 68  | 367  | 434  |
| Tc00.1047053510431.160 | <i>T. cruzi</i> | 209 | 446  | 654  |
| Tc00.1047053510431.180 | <i>T. cruzi</i> | 71  | 297  | 367  |
| Tc00.1047053510431.190 | <i>T. cruzi</i> | 80  | 1    | 80   |
| Tc00.1047053510431.190 | <i>T. cruzi</i> | 89  | 218  | 306  |
| Tc00.1047053510431.20  | <i>T. cruzi</i> | 84  | 151  | 234  |
| Tc00.1047053510431.210 | <i>T. cruzi</i> | 65  | 1    | 65   |
| Tc00.1047053510431.210 | <i>T. cruzi</i> | 41  | 77   | 117  |
| Tc00.1047053510431.210 | <i>T. cruzi</i> | 41  | 77   | 117  |
| Tc00.1047053510431.220 | <i>T. cruzi</i> | 135 | 1    | 135  |
| Tc00.1047053510431.220 | <i>T. cruzi</i> | 41  | 213  | 253  |
| Tc00.1047053510431.230 | <i>T. cruzi</i> | 47  | 135  | 181  |
| Tc00.1047053510431.240 | <i>T. cruzi</i> | 55  | 53   | 107  |
| Tc00.1047053510431.240 | <i>T. cruzi</i> | 79  | 241  | 319  |
| Tc00.1047053510431.260 | <i>T. cruzi</i> | 79  | 1    | 79   |
| Tc00.1047053510431.260 | <i>T. cruzi</i> | 44  | 128  | 171  |
| Tc00.1047053510431.260 | <i>T. cruzi</i> | 44  | 128  | 171  |
| Tc00.1047053510431.270 | <i>T. cruzi</i> | 54  | 507  | 560  |
| Tc00.1047053510431.280 | <i>T. cruzi</i> | 44  | 187  | 230  |
| Tc00.1047053510431.290 | <i>T. cruzi</i> | 49  | 1    | 49   |
| Tc00.1047053510431.320 | <i>T. cruzi</i> | 104 | 1    | 104  |
| Tc00.1047053510431.80  | <i>T. cruzi</i> | 76  | 1    | 76   |
| Tc00.1047053510431.80  | <i>T. cruzi</i> | 146 | 293  | 438  |
| Tc00.1047053510431.80  | <i>T. cruzi</i> | 122 | 1528 | 1649 |
| Tc00.1047053510441.20  | <i>T. cruzi</i> | 51  | 1596 | 1646 |
| Tc00.1047053510441.20  | <i>T. cruzi</i> | 46  | 2402 | 2447 |
| Tc00.1047053510441.20  | <i>T. cruzi</i> | 68  | 2836 | 2903 |
| Tc00.1047053510441.20  | <i>T. cruzi</i> | 82  | 3379 | 3460 |
| Tc00.1047053510449.10  | <i>T. cruzi</i> | 58  | 1592 | 1649 |
| Tc00.1047053510449.10  | <i>T. cruzi</i> | 63  | 2835 | 2897 |
| Tc00.1047053510449.10  | <i>T. cruzi</i> | 80  | 3377 | 3456 |
| Tc00.1047053510491.60  | <i>T. cruzi</i> | 215 | 650  | 864  |
| Tc00.1047053510507.20  | <i>T. cruzi</i> | 41  | 270  | 310  |
| Tc00.1047053510507.40  | <i>T. cruzi</i> | 81  | 28   | 108  |
| Tc00.1047053510507.50  | <i>T. cruzi</i> | 64  | 1    | 64   |
| Tc00.1047053510507.50  | <i>T. cruzi</i> | 188 | 142  | 329  |
| Tc00.1047053510509.20  | <i>T. cruzi</i> | 44  | 40   | 83   |
| Tc00.1047053510509.30  | <i>T. cruzi</i> | 45  | 310  | 354  |
| Tc00.1047053510509.9   | <i>T. cruzi</i> | 99  | 275  | 373  |
| Tc00.1047053510509.9   | <i>T. cruzi</i> | 53  | 440  | 492  |
| Tc00.1047053510509.9   | <i>T. cruzi</i> | 47  | 579  | 625  |

|                        |                 |     |      |      |
|------------------------|-----------------|-----|------|------|
| Tc00.1047053510513.20  | <i>T. cruzi</i> | 44  | 263  | 306  |
| Tc00.1047053510513.30  | <i>T. cruzi</i> | 83  | 1    | 83   |
| Tc00.1047053510513.30  | <i>T. cruzi</i> | 57  | 101  | 157  |
| Tc00.1047053510513.30  | <i>T. cruzi</i> | 41  | 280  | 320  |
| Tc00.1047053510513.50  | <i>T. cruzi</i> | 54  | 356  | 409  |
| Tc00.1047053510513.70  | <i>T. cruzi</i> | 74  | 74   | 147  |
| Tc00.1047053510513.70  | <i>T. cruzi</i> | 112 | 320  | 431  |
| Tc00.1047053510513.70  | <i>T. cruzi</i> | 198 | 452  | 649  |
| Tc00.1047053510513.80  | <i>T. cruzi</i> | 45  | 37   | 81   |
| Tc00.1047053510513.80  | <i>T. cruzi</i> | 291 | 132  | 422  |
| Tc00.1047053510513.80  | <i>T. cruzi</i> | 134 | 428  | 561  |
| Tc00.1047053510513.80  | <i>T. cruzi</i> | 90  | 648  | 737  |
| Tc00.1047053510515.100 | <i>T. cruzi</i> | 83  | 401  | 483  |
| Tc00.1047053510515.130 | <i>T. cruzi</i> | 47  | 52   | 98   |
| Tc00.1047053510515.130 | <i>T. cruzi</i> | 40  | 178  | 217  |
| Tc00.1047053510515.130 | <i>T. cruzi</i> | 48  | 256  | 303  |
| Tc00.1047053510515.30  | <i>T. cruzi</i> | 56  | 1    | 56   |
| Tc00.1047053510515.30  | <i>T. cruzi</i> | 49  | 141  | 189  |
| Tc00.1047053510515.30  | <i>T. cruzi</i> | 115 | 250  | 364  |
| Tc00.1047053510515.40  | <i>T. cruzi</i> | 41  | 106  | 146  |
| Tc00.1047053510515.50  | <i>T. cruzi</i> | 84  | 164  | 247  |
| Tc00.1047053510515.60  | <i>T. cruzi</i> | 60  | 1    | 60   |
| Tc00.1047053510515.60  | <i>T. cruzi</i> | 63  | 522  | 584  |
| Tc00.1047053510515.80  | <i>T. cruzi</i> | 72  | 79   | 150  |
| Tc00.1047053510515.80  | <i>T. cruzi</i> | 79  | 197  | 275  |
| Tc00.1047053510515.80  | <i>T. cruzi</i> | 155 | 363  | 517  |
| Tc00.1047053510515.80  | <i>T. cruzi</i> | 59  | 802  | 860  |
| Tc00.1047053510515.80  | <i>T. cruzi</i> | 75  | 1038 | 1112 |
| Tc00.1047053510515.80  | <i>T. cruzi</i> | 74  | 1219 | 1292 |
| Tc00.1047053510517.100 | <i>T. cruzi</i> | 72  | 51   | 122  |
| Tc00.1047053510517.100 | <i>T. cruzi</i> | 50  | 509  | 558  |
| Tc00.1047053510517.110 | <i>T. cruzi</i> | 134 | 1    | 134  |
| Tc00.1047053510517.20  | <i>T. cruzi</i> | 107 | 17   | 123  |
| Tc00.1047053510517.30  | <i>T. cruzi</i> | 165 | 107  | 271  |
| Tc00.1047053510517.30  | <i>T. cruzi</i> | 66  | 353  | 418  |
| Tc00.1047053510517.30  | <i>T. cruzi</i> | 85  | 508  | 592  |
| Tc00.1047053510517.30  | <i>T. cruzi</i> | 119 | 630  | 748  |
| Tc00.1047053510517.40  | <i>T. cruzi</i> | 96  | 556  | 651  |
| Tc00.1047053510517.50  | <i>T. cruzi</i> | 146 | 1    | 146  |
| Tc00.1047053510517.50  | <i>T. cruzi</i> | 209 | 186  | 394  |
| Tc00.1047053510517.50  | <i>T. cruzi</i> | 105 | 493  | 597  |
| Tc00.1047053510517.50  | <i>T. cruzi</i> | 99  | 784  | 882  |
| Tc00.1047053510517.60  | <i>T. cruzi</i> | 344 | 51   | 394  |
| Tc00.1047053510517.70  | <i>T. cruzi</i> | 49  | 1052 | 1100 |
| Tc00.1047053510517.80  | <i>T. cruzi</i> | 57  | 126  | 182  |
| Tc00.1047053510517.80  | <i>T. cruzi</i> | 58  | 231  | 288  |
| Tc00.1047053510517.90  | <i>T. cruzi</i> | 52  | 388  | 439  |

|                        |                 |     |      |      |
|------------------------|-----------------|-----|------|------|
| Tc00.1047053510517.90  | <i>T. cruzi</i> | 69  | 446  | 514  |
| Tc00.1047053510517.90  | <i>T. cruzi</i> | 78  | 516  | 593  |
| Tc00.1047053510517.90  | <i>T. cruzi</i> | 137 | 624  | 760  |
| Tc00.1047053510523.20  | <i>T. cruzi</i> | 50  | 206  | 255  |
| Tc00.1047053510525.10  | <i>T. cruzi</i> | 60  | 280  | 339  |
| Tc00.1047053510525.100 | <i>T. cruzi</i> | 66  | 70   | 135  |
| Tc00.1047053510525.110 | <i>T. cruzi</i> | 66  | 70   | 135  |
| Tc00.1047053510525.120 | <i>T. cruzi</i> | 112 | 389  | 500  |
| Tc00.1047053510525.120 | <i>T. cruzi</i> | 54  | 582  | 635  |
| Tc00.1047053510525.120 | <i>T. cruzi</i> | 54  | 582  | 635  |
| Tc00.1047053510525.130 | <i>T. cruzi</i> | 42  | 185  | 226  |
| Tc00.1047053510525.139 | <i>T. cruzi</i> | 54  | 1    | 54   |
| Tc00.1047053510525.30  | <i>T. cruzi</i> | 50  | 155  | 204  |
| Tc00.1047053510525.40  | <i>T. cruzi</i> | 60  | 1    | 60   |
| Tc00.1047053510525.50  | <i>T. cruzi</i> | 154 | 1    | 154  |
| Tc00.1047053510525.50  | <i>T. cruzi</i> | 55  | 342  | 396  |
| Tc00.1047053510525.50  | <i>T. cruzi</i> | 89  | 443  | 531  |
| Tc00.1047053510525.60  | <i>T. cruzi</i> | 118 | 1    | 118  |
| Tc00.1047053510525.70  | <i>T. cruzi</i> | 47  | 81   | 127  |
| Tc00.1047053510525.70  | <i>T. cruzi</i> | 143 | 192  | 334  |
| Tc00.1047053510525.80  | <i>T. cruzi</i> | 66  | 70   | 135  |
| Tc00.1047053510525.90  | <i>T. cruzi</i> | 66  | 70   | 135  |
| Tc00.1047053510527.9   | <i>T. cruzi</i> | 47  | 181  | 227  |
| Tc00.1047053510527.9   | <i>T. cruzi</i> | 79  | 251  | 329  |
| Tc00.1047053510527.9   | <i>T. cruzi</i> | 133 | 492  | 624  |
| Tc00.1047053510529.20  | <i>T. cruzi</i> | 77  | 1    | 77   |
| Tc00.1047053510529.30  | <i>T. cruzi</i> | 40  | 325  | 364  |
| Tc00.1047053510529.30  | <i>T. cruzi</i> | 56  | 1097 | 1152 |
| Tc00.1047053510531.10  | <i>T. cruzi</i> | 53  | 432  | 484  |
| Tc00.1047053510531.100 | <i>T. cruzi</i> | 104 | 99   | 202  |
| Tc00.1047053510531.100 | <i>T. cruzi</i> | 55  | 225  | 279  |
| Tc00.1047053510531.100 | <i>T. cruzi</i> | 243 | 366  | 608  |
| Tc00.1047053510531.100 | <i>T. cruzi</i> | 91  | 663  | 753  |
| Tc00.1047053510531.100 | <i>T. cruzi</i> | 77  | 762  | 838  |
| Tc00.1047053510531.109 | <i>T. cruzi</i> | 41  | 434  | 474  |
| Tc00.1047053510531.20  | <i>T. cruzi</i> | 144 | 42   | 185  |
| Tc00.1047053510531.20  | <i>T. cruzi</i> | 42  | 274  | 315  |
| Tc00.1047053510531.30  | <i>T. cruzi</i> | 54  | 1    | 54   |
| Tc00.1047053510531.30  | <i>T. cruzi</i> | 78  | 110  | 187  |
| Tc00.1047053510531.30  | <i>T. cruzi</i> | 49  | 653  | 701  |
| Tc00.1047053510531.40  | <i>T. cruzi</i> | 230 | 220  | 449  |
| Tc00.1047053510531.50  | <i>T. cruzi</i> | 45  | 1    | 45   |
| Tc00.1047053510531.50  | <i>T. cruzi</i> | 135 | 500  | 634  |
| Tc00.1047053510531.50  | <i>T. cruzi</i> | 58  | 698  | 755  |
| Tc00.1047053510531.60  | <i>T. cruzi</i> | 69  | 1    | 69   |
| Tc00.1047053510531.60  | <i>T. cruzi</i> | 211 | 119  | 329  |
| Tc00.1047053510531.60  | <i>T. cruzi</i> | 294 | 333  | 626  |

|                        |                 |     |      |      |
|------------------------|-----------------|-----|------|------|
| Tc00.1047053510531.60  | <i>T. cruzi</i> | 118 | 651  | 768  |
| Tc00.1047053510531.60  | <i>T. cruzi</i> | 125 | 808  | 932  |
| Tc00.1047053510531.60  | <i>T. cruzi</i> | 128 | 940  | 1067 |
| Tc00.1047053510533.110 | <i>T. cruzi</i> | 98  | 1    | 98   |
| Tc00.1047053510533.110 | <i>T. cruzi</i> | 70  | 664  | 733  |
| Tc00.1047053510533.120 | <i>T. cruzi</i> | 48  | 116  | 163  |
| Tc00.1047053510533.120 | <i>T. cruzi</i> | 56  | 630  | 685  |
| Tc00.1047053510533.120 | <i>T. cruzi</i> | 45  | 734  | 778  |
| Tc00.1047053510533.150 | <i>T. cruzi</i> | 55  | 781  | 835  |
| Tc00.1047053510533.160 | <i>T. cruzi</i> | 632 | 125  | 756  |
| Tc00.1047053510533.170 | <i>T. cruzi</i> | 62  | 83   | 144  |
| Tc00.1047053510533.170 | <i>T. cruzi</i> | 289 | 216  | 504  |
| Tc00.1047053510533.190 | <i>T. cruzi</i> | 85  | 1    | 85   |
| Tc00.1047053510533.190 | <i>T. cruzi</i> | 124 | 112  | 235  |
| Tc00.1047053510533.190 | <i>T. cruzi</i> | 110 | 275  | 384  |
| Tc00.1047053510533.190 | <i>T. cruzi</i> | 53  | 438  | 490  |
| Tc00.1047053510533.220 | <i>T. cruzi</i> | 147 | 1    | 147  |
| Tc00.1047053510533.230 | <i>T. cruzi</i> | 101 | 248  | 348  |
| Tc00.1047053510533.50  | <i>T. cruzi</i> | 120 | 1    | 120  |
| Tc00.1047053510533.50  | <i>T. cruzi</i> | 47  | 388  | 434  |
| Tc00.1047053510533.50  | <i>T. cruzi</i> | 41  | 526  | 566  |
| Tc00.1047053510533.60  | <i>T. cruzi</i> | 54  | 314  | 367  |
| Tc00.1047053510533.70  | <i>T. cruzi</i> | 95  | 337  | 431  |
| Tc00.1047053510533.70  | <i>T. cruzi</i> | 67  | 443  | 509  |
| Tc00.1047053510533.90  | <i>T. cruzi</i> | 227 | 87   | 313  |
| Tc00.1047053510533.90  | <i>T. cruzi</i> | 43  | 368  | 410  |
| Tc00.1047053510533.90  | <i>T. cruzi</i> | 64  | 597  | 660  |
| Tc00.1047053510533.90  | <i>T. cruzi</i> | 86  | 891  | 976  |
| Tc00.1047053510535.100 | <i>T. cruzi</i> | 47  | 49   | 95   |
| Tc00.1047053510535.109 | <i>T. cruzi</i> | 42  | 1    | 42   |
| Tc00.1047053510535.20  | <i>T. cruzi</i> | 42  | 481  | 522  |
| Tc00.1047053510535.20  | <i>T. cruzi</i> | 58  | 1263 | 1320 |
| Tc00.1047053510535.20  | <i>T. cruzi</i> | 50  | 2468 | 2517 |
| Tc00.1047053510535.30  | <i>T. cruzi</i> | 126 | 1    | 126  |
| Tc00.1047053510535.40  | <i>T. cruzi</i> | 69  | 460  | 528  |
| Tc00.1047053510535.50  | <i>T. cruzi</i> | 76  | 1    | 76   |
| Tc00.1047053510535.60  | <i>T. cruzi</i> | 45  | 292  | 336  |
| Tc00.1047053510535.70  | <i>T. cruzi</i> | 41  | 46   | 86   |
| Tc00.1047053510553.30  | <i>T. cruzi</i> | 349 | 31   | 379  |
| Tc00.1047053510553.40  | <i>T. cruzi</i> | 41  | 66   | 106  |
| Tc00.1047053510553.40  | <i>T. cruzi</i> | 40  | 186  | 225  |
| Tc00.1047053510553.40  | <i>T. cruzi</i> | 41  | 471  | 511  |
| Tc00.1047053510553.40  | <i>T. cruzi</i> | 167 | 767  | 933  |
| Tc00.1047053510555.30  | <i>T. cruzi</i> | 162 | 26   | 187  |
| Tc00.1047053510557.30  | <i>T. cruzi</i> | 114 | 1    | 114  |
| Tc00.1047053510557.30  | <i>T. cruzi</i> | 63  | 138  | 200  |
| Tc00.1047053510557.50  | <i>T. cruzi</i> | 186 | 23   | 208  |

|                        |                 |     |      |      |
|------------------------|-----------------|-----|------|------|
| Tc00.1047053510557.60  | <i>T. cruzi</i> | 318 | 27   | 344  |
| Tc00.1047053510557.70  | <i>T. cruzi</i> | 273 | 27   | 299  |
| Tc00.1047053510557.80  | <i>T. cruzi</i> | 157 | 22   | 178  |
| Tc00.1047053510561.20  | <i>T. cruzi</i> | 219 | 26   | 244  |
| Tc00.1047053510561.30  | <i>T. cruzi</i> | 319 | 27   | 345  |
| Tc00.1047053510561.40  | <i>T. cruzi</i> | 295 | 30   | 324  |
| Tc00.1047053510561.50  | <i>T. cruzi</i> | 429 | 71   | 499  |
| Tc00.1047053510565.100 | <i>T. cruzi</i> | 44  | 287  | 330  |
| Tc00.1047053510565.11  | <i>T. cruzi</i> | 45  | 16   | 60   |
| Tc00.1047053510565.110 | <i>T. cruzi</i> | 49  | 23   | 71   |
| Tc00.1047053510565.120 | <i>T. cruzi</i> | 173 | 100  | 272  |
| Tc00.1047053510565.120 | <i>T. cruzi</i> | 62  | 312  | 373  |
| Tc00.1047053510565.130 | <i>T. cruzi</i> | 83  | 1    | 83   |
| Tc00.1047053510565.130 | <i>T. cruzi</i> | 110 | 152  | 261  |
| Tc00.1047053510565.141 | <i>T. cruzi</i> | 53  | 53   | 105  |
| Tc00.1047053510565.150 | <i>T. cruzi</i> | 54  | 246  | 299  |
| Tc00.1047053510565.160 | <i>T. cruzi</i> | 52  | 55   | 106  |
| Tc00.1047053510565.160 | <i>T. cruzi</i> | 89  | 214  | 302  |
| Tc00.1047053510565.160 | <i>T. cruzi</i> | 89  | 214  | 302  |
| Tc00.1047053510565.170 | <i>T. cruzi</i> | 54  | 1    | 54   |
| Tc00.1047053510565.170 | <i>T. cruzi</i> | 47  | 112  | 158  |
| Tc00.1047053510565.170 | <i>T. cruzi</i> | 47  | 112  | 158  |
| Tc00.1047053510565.179 | <i>T. cruzi</i> | 49  | 791  | 839  |
| Tc00.1047053510565.179 | <i>T. cruzi</i> | 42  | 1228 | 1269 |
| Tc00.1047053510565.179 | <i>T. cruzi</i> | 52  | 1330 | 1381 |
| Tc00.1047053510565.179 | <i>T. cruzi</i> | 40  | 1931 | 1970 |
| Tc00.1047053510565.40  | <i>T. cruzi</i> | 95  | 108  | 202  |
| Tc00.1047053510565.50  | <i>T. cruzi</i> | 115 | 1    | 115  |
| Tc00.1047053510565.50  | <i>T. cruzi</i> | 42  | 332  | 373  |
| Tc00.1047053510565.50  | <i>T. cruzi</i> | 154 | 452  | 605  |
| Tc00.1047053510591.20  | <i>T. cruzi</i> | 77  | 114  | 190  |
| Tc00.1047053510593.10  | <i>T. cruzi</i> | 43  | 18   | 60   |
| Tc00.1047053510593.30  | <i>T. cruzi</i> | 56  | 103  | 158  |
| Tc00.1047053510593.40  | <i>T. cruzi</i> | 106 | 55   | 160  |
| Tc00.1047053510593.40  | <i>T. cruzi</i> | 51  | 195  | 245  |
| Tc00.1047053510593.40  | <i>T. cruzi</i> | 96  | 263  | 358  |
| Tc00.1047053510593.49  | <i>T. cruzi</i> | 662 | 1    | 662  |
| Tc00.1047053510595.20  | <i>T. cruzi</i> | 79  | 71   | 149  |
| Tc00.1047053510595.20  | <i>T. cruzi</i> | 49  | 236  | 284  |
| Tc00.1047053510595.20  | <i>T. cruzi</i> | 49  | 236  | 284  |
| Tc00.1047053510595.30  | <i>T. cruzi</i> | 66  | 1    | 66   |
| Tc00.1047053510595.4   | <i>T. cruzi</i> | 161 | 1    | 161  |
| Tc00.1047053510595.40  | <i>T. cruzi</i> | 41  | 226  | 266  |
| Tc00.1047053510595.49  | <i>T. cruzi</i> | 95  | 1    | 95   |
| Tc00.1047053510595.49  | <i>T. cruzi</i> | 162 | 206  | 367  |
| Tc00.1047053510597.30  | <i>T. cruzi</i> | 44  | 652  | 695  |
| Tc00.1047053510597.30  | <i>T. cruzi</i> | 66  | 824  | 889  |

|                        |                 |     |      |      |
|------------------------|-----------------|-----|------|------|
| Tc00.1047053510597.30  | <i>T. cruzi</i> | 52  | 1099 | 1150 |
| Tc00.1047053510597.9   | <i>T. cruzi</i> | 97  | 49   | 145  |
| Tc00.1047053510597.9   | <i>T. cruzi</i> | 72  | 162  | 233  |
| Tc00.1047053510597.9   | <i>T. cruzi</i> | 89  | 256  | 344  |
| Tc00.1047053510597.9   | <i>T. cruzi</i> | 78  | 617  | 694  |
| Tc00.1047053510599.30  | <i>T. cruzi</i> | 46  | 50   | 95   |
| Tc00.1047053510599.30  | <i>T. cruzi</i> | 71  | 718  | 788  |
| Tc00.1047053510599.30  | <i>T. cruzi</i> | 114 | 810  | 923  |
| Tc00.1047053510599.40  | <i>T. cruzi</i> | 170 | 230  | 399  |
| Tc00.1047053510599.40  | <i>T. cruzi</i> | 105 | 926  | 1030 |
| Tc00.1047053510599.40  | <i>T. cruzi</i> | 196 | 1064 | 1259 |
| Tc00.1047053510599.40  | <i>T. cruzi</i> | 72  | 1345 | 1416 |
| Tc00.1047053510599.50  | <i>T. cruzi</i> | 69  | 346  | 414  |
| Tc00.1047053510599.50  | <i>T. cruzi</i> | 113 | 416  | 528  |
| Tc00.1047053510599.50  | <i>T. cruzi</i> | 113 | 416  | 528  |
| Tc00.1047053510601.20  | <i>T. cruzi</i> | 52  | 1    | 52   |
| Tc00.1047053510601.20  | <i>T. cruzi</i> | 103 | 462  | 564  |
| Tc00.1047053510601.30  | <i>T. cruzi</i> | 265 | 560  | 824  |
| Tc00.1047053510603.10  | <i>T. cruzi</i> | 52  | 39   | 90   |
| Tc00.1047053510603.100 | <i>T. cruzi</i> | 61  | 96   | 156  |
| Tc00.1047053510603.100 | <i>T. cruzi</i> | 46  | 331  | 376  |
| Tc00.1047053510603.100 | <i>T. cruzi</i> | 46  | 331  | 376  |
| Tc00.1047053510603.119 | <i>T. cruzi</i> | 113 | 1    | 113  |
| Tc00.1047053510603.119 | <i>T. cruzi</i> | 60  | 128  | 187  |
| Tc00.1047053510603.130 | <i>T. cruzi</i> | 62  | 192  | 253  |
| Tc00.1047053510603.130 | <i>T. cruzi</i> | 54  | 318  | 371  |
| Tc00.1047053510603.130 | <i>T. cruzi</i> | 41  | 450  | 490  |
| Tc00.1047053510603.130 | <i>T. cruzi</i> | 57  | 1110 | 1166 |
| Tc00.1047053510603.130 | <i>T. cruzi</i> | 132 | 1346 | 1477 |
| Tc00.1047053510603.130 | <i>T. cruzi</i> | 59  | 2218 | 2276 |
| Tc00.1047053510603.130 | <i>T. cruzi</i> | 41  | 2561 | 2601 |
| Tc00.1047053510603.130 | <i>T. cruzi</i> | 93  | 2684 | 2776 |
| Tc00.1047053510603.130 | <i>T. cruzi</i> | 73  | 2983 | 3055 |
| Tc00.1047053510603.130 | <i>T. cruzi</i> | 48  | 3241 | 3288 |
| Tc00.1047053510603.130 | <i>T. cruzi</i> | 55  | 3691 | 3745 |
| Tc00.1047053510603.130 | <i>T. cruzi</i> | 56  | 3896 | 3951 |
| Tc00.1047053510603.140 | <i>T. cruzi</i> | 105 | 1    | 105  |
| Tc00.1047053510603.140 | <i>T. cruzi</i> | 67  | 113  | 179  |
| Tc00.1047053510603.140 | <i>T. cruzi</i> | 214 | 232  | 445  |
| Tc00.1047053510603.150 | <i>T. cruzi</i> | 43  | 96   | 138  |
| Tc00.1047053510603.169 | <i>T. cruzi</i> | 88  | 166  | 253  |
| Tc00.1047053510603.20  | <i>T. cruzi</i> | 53  | 1    | 53   |
| Tc00.1047053510603.30  | <i>T. cruzi</i> | 47  | 65   | 111  |
| Tc00.1047053510605.10  | <i>T. cruzi</i> | 58  | 298  | 355  |
| Tc00.1047053510605.19  | <i>T. cruzi</i> | 86  | 142  | 227  |
| Tc00.1047053510607.29  | <i>T. cruzi</i> | 63  | 1617 | 1679 |
| Tc00.1047053510607.29  | <i>T. cruzi</i> | 73  | 2863 | 2935 |



|                        |                 |     |      |      |
|------------------------|-----------------|-----|------|------|
| Tc00.1047053510607.29  | <i>T. cruzi</i> | 73  | 2863 | 2935 |
| Tc00.1047053510607.80  | <i>T. cruzi</i> | 40  | 243  | 282  |
| Tc00.1047053510607.80  | <i>T. cruzi</i> | 52  | 1618 | 1669 |
| Tc00.1047053510607.80  | <i>T. cruzi</i> | 100 | 2858 | 2957 |
| Tc00.1047053510607.80  | <i>T. cruzi</i> | 82  | 3403 | 3484 |
| Tc00.1047053510609.100 | <i>T. cruzi</i> | 167 | 1    | 167  |
| Tc00.1047053510609.100 | <i>T. cruzi</i> | 72  | 297  | 368  |
| Tc00.1047053510609.100 | <i>T. cruzi</i> | 149 | 553  | 701  |
| Tc00.1047053510609.110 | <i>T. cruzi</i> | 173 | 35   | 207  |
| Tc00.1047053510609.110 | <i>T. cruzi</i> | 50  | 574  | 623  |
| Tc00.1047053510609.110 | <i>T. cruzi</i> | 121 | 711  | 831  |
| Tc00.1047053510609.120 | <i>T. cruzi</i> | 113 | 141  | 253  |
| Tc00.1047053510609.120 | <i>T. cruzi</i> | 63  | 368  | 430  |
| Tc00.1047053510609.120 | <i>T. cruzi</i> | 79  | 530  | 608  |
| Tc00.1047053510609.130 | <i>T. cruzi</i> | 91  | 14   | 104  |
| Tc00.1047053510609.130 | <i>T. cruzi</i> | 85  | 415  | 499  |
| Tc00.1047053510609.130 | <i>T. cruzi</i> | 40  | 573  | 612  |
| Tc00.1047053510609.30  | <i>T. cruzi</i> | 54  | 1    | 54   |
| Tc00.1047053510609.30  | <i>T. cruzi</i> | 42  | 115  | 156  |
| Tc00.1047053510609.30  | <i>T. cruzi</i> | 40  | 158  | 197  |
| Tc00.1047053510609.30  | <i>T. cruzi</i> | 94  | 509  | 602  |
| Tc00.1047053510609.60  | <i>T. cruzi</i> | 60  | 50   | 109  |
| Tc00.1047053510609.60  | <i>T. cruzi</i> | 737 | 217  | 953  |
| Tc00.1047053510609.60  | <i>T. cruzi</i> | 160 | 967  | 1126 |
| Tc00.1047053510609.60  | <i>T. cruzi</i> | 238 | 1130 | 1367 |
| Tc00.1047053510609.60  | <i>T. cruzi</i> | 52  | 1426 | 1477 |
| Tc00.1047053510609.80  | <i>T. cruzi</i> | 91  | 197  | 287  |
| Tc00.1047053510609.90  | <i>T. cruzi</i> | 61  | 172  | 232  |
| Tc00.1047053510611.10  | <i>T. cruzi</i> | 82  | 1    | 82   |
| Tc00.1047053510611.10  | <i>T. cruzi</i> | 180 | 148  | 327  |
| Tc00.1047053510611.10  | <i>T. cruzi</i> | 246 | 438  | 683  |
| Tc00.1047053510611.30  | <i>T. cruzi</i> | 65  | 456  | 520  |
| Tc00.1047053510611.30  | <i>T. cruzi</i> | 68  | 532  | 599  |
| Tc00.1047053510611.30  | <i>T. cruzi</i> | 227 | 776  | 1002 |
| Tc00.1047053510611.40  | <i>T. cruzi</i> | 59  | 134  | 192  |
| Tc00.1047053510611.40  | <i>T. cruzi</i> | 79  | 431  | 509  |
| Tc00.1047053510611.40  | <i>T. cruzi</i> | 147 | 830  | 976  |
| Tc00.1047053510611.50  | <i>T. cruzi</i> | 44  | 35   | 78   |
| Tc00.1047053510611.50  | <i>T. cruzi</i> | 211 | 237  | 447  |
| Tc00.1047053510611.50  | <i>T. cruzi</i> | 59  | 504  | 562  |
| Tc00.1047053510611.60  | <i>T. cruzi</i> | 58  | 41   | 98   |
| Tc00.1047053510611.70  | <i>T. cruzi</i> | 203 | 1    | 203  |
| Tc00.1047053510611.70  | <i>T. cruzi</i> | 396 | 215  | 610  |
| Tc00.1047053510611.70  | <i>T. cruzi</i> | 130 | 613  | 742  |
| Tc00.1047053510611.70  | <i>T. cruzi</i> | 66  | 892  | 957  |
| Tc00.1047053510611.70  | <i>T. cruzi</i> | 98  | 970  | 1067 |
| Tc00.1047053510611.70  | <i>T. cruzi</i> | 107 | 1097 | 1203 |

|                        |                 |     |      |      |
|------------------------|-----------------|-----|------|------|
| Tc00.1047053510611.79  | <i>T. cruzi</i> | 59  | 102  | 160  |
| Tc00.1047053510611.79  | <i>T. cruzi</i> | 44  | 198  | 241  |
| Tc00.1047053510611.79  | <i>T. cruzi</i> | 53  | 309  | 361  |
| Tc00.1047053510613.20  | <i>T. cruzi</i> | 150 | 1    | 150  |
| Tc00.1047053510613.20  | <i>T. cruzi</i> | 48  | 313  | 360  |
| Tc00.1047053510613.20  | <i>T. cruzi</i> | 79  | 388  | 466  |
| Tc00.1047053510613.20  | <i>T. cruzi</i> | 40  | 691  | 730  |
| Tc00.1047053510613.20  | <i>T. cruzi</i> | 217 | 773  | 989  |
| Tc00.1047053510613.30  | <i>T. cruzi</i> | 441 | 1    | 441  |
| Tc00.1047053510613.30  | <i>T. cruzi</i> | 101 | 478  | 578  |
| Tc00.1047053510613.30  | <i>T. cruzi</i> | 103 | 597  | 699  |
| Tc00.1047053510613.30  | <i>T. cruzi</i> | 180 | 714  | 893  |
| Tc00.1047053510613.30  | <i>T. cruzi</i> | 60  | 939  | 998  |
| Tc00.1047053510615.10  | <i>T. cruzi</i> | 109 | 1    | 109  |
| Tc00.1047053510615.10  | <i>T. cruzi</i> | 41  | 171  | 211  |
| Tc00.1047053510615.10  | <i>T. cruzi</i> | 41  | 239  | 279  |
| Tc00.1047053510617.19  | <i>T. cruzi</i> | 52  | 69   | 120  |
| Tc00.1047053510621.20  | <i>T. cruzi</i> | 379 | 41   | 419  |
| Tc00.1047053510621.30  | <i>T. cruzi</i> | 171 | 29   | 199  |
| Tc00.1047053510621.49  | <i>T. cruzi</i> | 192 | 54   | 245  |
| Tc00.1047053510621.60  | <i>T. cruzi</i> | 296 | 74   | 369  |
| Tc00.1047053510621.70  | <i>T. cruzi</i> | 141 | 24   | 164  |
| Tc00.1047053510717.20  | <i>T. cruzi</i> | 82  | 127  | 208  |
| Tc00.1047053510719.120 | <i>T. cruzi</i> | 191 | 73   | 263  |
| Tc00.1047053510719.120 | <i>T. cruzi</i> | 436 | 349  | 784  |
| Tc00.1047053510719.130 | <i>T. cruzi</i> | 185 | 144  | 328  |
| Tc00.1047053510719.150 | <i>T. cruzi</i> | 45  | 126  | 170  |
| Tc00.1047053510719.150 | <i>T. cruzi</i> | 57  | 1010 | 1066 |
| Tc00.1047053510719.150 | <i>T. cruzi</i> | 51  | 1131 | 1181 |
| Tc00.1047053510719.170 | <i>T. cruzi</i> | 64  | 111  | 174  |
| Tc00.1047053510719.200 | <i>T. cruzi</i> | 56  | 52   | 107  |
| Tc00.1047053510719.210 | <i>T. cruzi</i> | 247 | 1    | 247  |
| Tc00.1047053510719.210 | <i>T. cruzi</i> | 99  | 309  | 407  |
| Tc00.1047053510719.230 | <i>T. cruzi</i> | 76  | 1    | 76   |
| Tc00.1047053510719.230 | <i>T. cruzi</i> | 61  | 91   | 151  |
| Tc00.1047053510719.230 | <i>T. cruzi</i> | 40  | 391  | 430  |
| Tc00.1047053510719.230 | <i>T. cruzi</i> | 169 | 695  | 863  |
| Tc00.1047053510719.230 | <i>T. cruzi</i> | 51  | 910  | 960  |
| Tc00.1047053510719.240 | <i>T. cruzi</i> | 44  | 18   | 61   |
| Tc00.1047053510719.250 | <i>T. cruzi</i> | 104 | 79   | 182  |
| Tc00.1047053510719.280 | <i>T. cruzi</i> | 111 | 269  | 379  |
| Tc00.1047053510719.290 | <i>T. cruzi</i> | 158 | 37   | 194  |
| Tc00.1047053510719.300 | <i>T. cruzi</i> | 356 | 1    | 356  |
| Tc00.1047053510719.300 | <i>T. cruzi</i> | 65  | 1028 | 1092 |
| Tc00.1047053510719.310 | <i>T. cruzi</i> | 114 | 1    | 114  |
| Tc00.1047053510719.310 | <i>T. cruzi</i> | 169 | 290  | 458  |
| Tc00.1047053510719.50  | <i>T. cruzi</i> | 49  | 1    | 49   |

|                        |                 |     |      |      |
|------------------------|-----------------|-----|------|------|
| Tc00.1047053510719.80  | <i>T. cruzi</i> | 85  | 355  | 439  |
| Tc00.1047053510719.80  | <i>T. cruzi</i> | 55  | 577  | 631  |
| Tc00.1047053510719.80  | <i>T. cruzi</i> | 43  | 1009 | 1051 |
| Tc00.1047053510719.80  | <i>T. cruzi</i> | 121 | 1555 | 1675 |
| Tc00.1047053510719.80  | <i>T. cruzi</i> | 63  | 1859 | 1921 |
| Tc00.1047053510719.80  | <i>T. cruzi</i> | 53  | 2546 | 2598 |
| Tc00.1047053510719.90  | <i>T. cruzi</i> | 59  | 108  | 166  |
| Tc00.1047053510719.90  | <i>T. cruzi</i> | 109 | 230  | 338  |
| Tc00.1047053510721.21  | <i>T. cruzi</i> | 43  | 94   | 136  |
| Tc00.1047053510737.100 | <i>T. cruzi</i> | 181 | 1    | 181  |
| Tc00.1047053510737.119 | <i>T. cruzi</i> | 198 | 1    | 198  |
| Tc00.1047053510737.119 | <i>T. cruzi</i> | 177 | 251  | 427  |
| Tc00.1047053510737.40  | <i>T. cruzi</i> | 76  | 9    | 84   |
| Tc00.1047053510737.50  | <i>T. cruzi</i> | 47  | 312  | 358  |
| Tc00.1047053510737.60  | <i>T. cruzi</i> | 125 | 142  | 266  |
| Tc00.1047053510737.70  | <i>T. cruzi</i> | 88  | 1    | 88   |
| Tc00.1047053510737.79  | <i>T. cruzi</i> | 88  | 1    | 88   |
| Tc00.1047053510737.90  | <i>T. cruzi</i> | 130 | 1    | 130  |
| Tc00.1047053510741.100 | <i>T. cruzi</i> | 119 | 263  | 381  |
| Tc00.1047053510741.124 | <i>T. cruzi</i> | 42  | 1    | 42   |
| Tc00.1047053510741.140 | <i>T. cruzi</i> | 51  | 81   | 131  |
| Tc00.1047053510741.140 | <i>T. cruzi</i> | 88  | 764  | 851  |
| Tc00.1047053510741.140 | <i>T. cruzi</i> | 69  | 978  | 1046 |
| Tc00.1047053510741.140 | <i>T. cruzi</i> | 235 | 1064 | 1298 |
| Tc00.1047053510741.170 | <i>T. cruzi</i> | 41  | 214  | 254  |
| Tc00.1047053510741.180 | <i>T. cruzi</i> | 323 | 1    | 323  |
| Tc00.1047053510741.180 | <i>T. cruzi</i> | 73  | 726  | 798  |
| Tc00.1047053510741.220 | <i>T. cruzi</i> | 45  | 469  | 513  |
| Tc00.1047053510741.30  | <i>T. cruzi</i> | 149 | 46   | 194  |
| Tc00.1047053510741.40  | <i>T. cruzi</i> | 168 | 340  | 507  |
| Tc00.1047053510741.40  | <i>T. cruzi</i> | 69  | 513  | 581  |
| Tc00.1047053510741.50  | <i>T. cruzi</i> | 53  | 1    | 53   |
| Tc00.1047053510741.60  | <i>T. cruzi</i> | 53  | 62   | 114  |
| Tc00.1047053510741.60  | <i>T. cruzi</i> | 72  | 146  | 217  |
| Tc00.1047053510741.70  | <i>T. cruzi</i> | 232 | 1    | 232  |
| Tc00.1047053510741.70  | <i>T. cruzi</i> | 65  | 510  | 574  |
| Tc00.1047053510741.70  | <i>T. cruzi</i> | 85  | 899  | 983  |
| Tc00.1047053510741.80  | <i>T. cruzi</i> | 40  | 139  | 178  |
| Tc00.1047053510743.100 | <i>T. cruzi</i> | 71  | 48   | 118  |
| Tc00.1047053510743.100 | <i>T. cruzi</i> | 88  | 157  | 244  |
| Tc00.1047053510743.100 | <i>T. cruzi</i> | 73  | 376  | 448  |
| Tc00.1047053510743.110 | <i>T. cruzi</i> | 85  | 296  | 380  |
| Tc00.1047053510743.120 | <i>T. cruzi</i> | 68  | 155  | 222  |
| Tc00.1047053510743.20  | <i>T. cruzi</i> | 110 | 54   | 163  |
| Tc00.1047053510743.80  | <i>T. cruzi</i> | 42  | 330  | 371  |
| Tc00.1047053510743.90  | <i>T. cruzi</i> | 60  | 1    | 60   |
| Tc00.1047053510743.90  | <i>T. cruzi</i> | 84  | 304  | 387  |

|                        |                 |     |     |      |
|------------------------|-----------------|-----|-----|------|
| Tc00.1047053510743.90  | <i>T. cruzi</i> | 84  | 304 | 387  |
| Tc00.1047053510745.20  | <i>T. cruzi</i> | 82  | 1   | 82   |
| Tc00.1047053510745.20  | <i>T. cruzi</i> | 63  | 439 | 501  |
| Tc00.1047053510745.20  | <i>T. cruzi</i> | 63  | 439 | 501  |
| Tc00.1047053510745.40  | <i>T. cruzi</i> | 66  | 586 | 651  |
| Tc00.1047053510745.49  | <i>T. cruzi</i> | 91  | 47  | 137  |
| Tc00.1047053510747.10  | <i>T. cruzi</i> | 60  | 21  | 80   |
| Tc00.1047053510747.10  | <i>T. cruzi</i> | 65  | 196 | 260  |
| Tc00.1047053510747.10  | <i>T. cruzi</i> | 50  | 303 | 352  |
| Tc00.1047053510747.100 | <i>T. cruzi</i> | 143 | 1   | 143  |
| Tc00.1047053510747.100 | <i>T. cruzi</i> | 48  | 259 | 306  |
| Tc00.1047053510747.110 | <i>T. cruzi</i> | 43  | 44  | 86   |
| Tc00.1047053510747.110 | <i>T. cruzi</i> | 42  | 202 | 243  |
| Tc00.1047053510747.110 | <i>T. cruzi</i> | 80  | 307 | 386  |
| Tc00.1047053510747.120 | <i>T. cruzi</i> | 52  | 69  | 120  |
| Tc00.1047053510747.130 | <i>T. cruzi</i> | 53  | 1   | 53   |
| Tc00.1047053510747.130 | <i>T. cruzi</i> | 306 | 836 | 1141 |
| Tc00.1047053510747.140 | <i>T. cruzi</i> | 229 | 6   | 234  |
| Tc00.1047053510747.140 | <i>T. cruzi</i> | 46  | 253 | 298  |
| Tc00.1047053510747.150 | <i>T. cruzi</i> | 147 | 1   | 147  |
| Tc00.1047053510747.150 | <i>T. cruzi</i> | 53  | 234 | 286  |
| Tc00.1047053510747.18  | <i>T. cruzi</i> | 63  | 1   | 63   |
| Tc00.1047053510747.26  | <i>T. cruzi</i> | 57  | 63  | 119  |
| Tc00.1047053510747.34  | <i>T. cruzi</i> | 172 | 1   | 172  |
| Tc00.1047053510747.40  | <i>T. cruzi</i> | 61  | 238 | 298  |
| Tc00.1047053510747.60  | <i>T. cruzi</i> | 55  | 242 | 296  |
| Tc00.1047053510747.80  | <i>T. cruzi</i> | 128 | 1   | 128  |
| Tc00.1047053510747.80  | <i>T. cruzi</i> | 116 | 306 | 421  |
| Tc00.1047053510747.90  | <i>T. cruzi</i> | 80  | 418 | 497  |
| Tc00.1047053510749.20  | <i>T. cruzi</i> | 95  | 272 | 366  |
| Tc00.1047053510749.20  | <i>T. cruzi</i> | 56  | 369 | 424  |
| Tc00.1047053510749.30  | <i>T. cruzi</i> | 62  | 303 | 364  |
| Tc00.1047053510749.40  | <i>T. cruzi</i> | 147 | 1   | 147  |
| Tc00.1047053510749.50  | <i>T. cruzi</i> | 63  | 175 | 237  |
| Tc00.1047053510749.60  | <i>T. cruzi</i> | 73  | 146 | 218  |
| Tc00.1047053510749.74  | <i>T. cruzi</i> | 84  | 322 | 405  |
| Tc00.1047053510749.74  | <i>T. cruzi</i> | 124 | 459 | 582  |
| Tc00.1047053510749.90  | <i>T. cruzi</i> | 45  | 1   | 45   |
| Tc00.1047053510749.90  | <i>T. cruzi</i> | 104 | 52  | 155  |
| Tc00.1047053510749.90  | <i>T. cruzi</i> | 104 | 52  | 155  |
| Tc00.1047053510751.30  | <i>T. cruzi</i> | 86  | 83  | 168  |
| Tc00.1047053510751.30  | <i>T. cruzi</i> | 115 | 180 | 294  |
| Tc00.1047053510751.30  | <i>T. cruzi</i> | 115 | 180 | 294  |
| Tc00.1047053510751.4   | <i>T. cruzi</i> | 63  | 1   | 63   |
| Tc00.1047053510753.9   | <i>T. cruzi</i> | 306 | 1   | 306  |
| Tc00.1047053510755.110 | <i>T. cruzi</i> | 56  | 107 | 162  |
| Tc00.1047053510755.120 | <i>T. cruzi</i> | 98  | 99  | 196  |

|                        |                 |     |     |     |
|------------------------|-----------------|-----|-----|-----|
| Tc00.1047053510755.19  | <i>T. cruzi</i> | 43  | 119 | 161 |
| Tc00.1047053510755.19  | <i>T. cruzi</i> | 77  | 623 | 699 |
| Tc00.1047053510755.40  | <i>T. cruzi</i> | 56  | 65  | 120 |
| Tc00.1047053510757.9   | <i>T. cruzi</i> | 53  | 54  | 106 |
| Tc00.1047053510757.9   | <i>T. cruzi</i> | 78  | 305 | 382 |
| Tc00.1047053510757.9   | <i>T. cruzi</i> | 57  | 384 | 440 |
| Tc00.1047053510757.9   | <i>T. cruzi</i> | 40  | 490 | 529 |
| Tc00.1047053510759.100 | <i>T. cruzi</i> | 44  | 215 | 258 |
| Tc00.1047053510759.100 | <i>T. cruzi</i> | 208 | 295 | 502 |
| Tc00.1047053510759.110 | <i>T. cruzi</i> | 42  | 414 | 455 |
| Tc00.1047053510759.114 | <i>T. cruzi</i> | 71  | 54  | 124 |
| Tc00.1047053510759.130 | <i>T. cruzi</i> | 52  | 108 | 159 |
| Tc00.1047053510759.130 | <i>T. cruzi</i> | 48  | 329 | 376 |
| Tc00.1047053510759.130 | <i>T. cruzi</i> | 48  | 329 | 376 |
| Tc00.1047053510759.150 | <i>T. cruzi</i> | 69  | 1   | 69  |
| Tc00.1047053510759.160 | <i>T. cruzi</i> | 108 | 335 | 442 |
| Tc00.1047053510759.170 | <i>T. cruzi</i> | 51  | 196 | 246 |
| Tc00.1047053510759.180 | <i>T. cruzi</i> | 40  | 383 | 422 |
| Tc00.1047053510759.40  | <i>T. cruzi</i> | 46  | 315 | 360 |
| Tc00.1047053510759.40  | <i>T. cruzi</i> | 112 | 399 | 510 |
| Tc00.1047053510759.40  | <i>T. cruzi</i> | 112 | 399 | 510 |
| Tc00.1047053510759.50  | <i>T. cruzi</i> | 130 | 91  | 220 |
| Tc00.1047053510759.50  | <i>T. cruzi</i> | 122 | 233 | 354 |
| Tc00.1047053510759.50  | <i>T. cruzi</i> | 122 | 233 | 354 |
| Tc00.1047053510759.70  | <i>T. cruzi</i> | 218 | 78  | 295 |
| Tc00.1047053510759.70  | <i>T. cruzi</i> | 44  | 458 | 501 |
| Tc00.1047053510759.70  | <i>T. cruzi</i> | 388 | 540 | 927 |
| Tc00.1047053510761.10  | <i>T. cruzi</i> | 45  | 376 | 420 |
| Tc00.1047053510761.10  | <i>T. cruzi</i> | 143 | 428 | 570 |
| Tc00.1047053510761.14  | <i>T. cruzi</i> | 44  | 1   | 44  |
| Tc00.1047053510761.14  | <i>T. cruzi</i> | 58  | 86  | 143 |
| Tc00.1047053510761.18  | <i>T. cruzi</i> | 77  | 172 | 248 |
| Tc00.1047053510761.22  | <i>T. cruzi</i> | 97  | 202 | 298 |
| Tc00.1047053510761.4   | <i>T. cruzi</i> | 64  | 116 | 179 |
| Tc00.1047053510761.4   | <i>T. cruzi</i> | 240 | 208 | 447 |
| Tc00.1047053510761.70  | <i>T. cruzi</i> | 41  | 700 | 740 |
| Tc00.1047053510761.80  | <i>T. cruzi</i> | 61  | 238 | 298 |
| Tc00.1047053510763.100 | <i>T. cruzi</i> | 49  | 1   | 49  |
| Tc00.1047053510763.100 | <i>T. cruzi</i> | 270 | 74  | 343 |
| Tc00.1047053510763.109 | <i>T. cruzi</i> | 88  | 1   | 88  |
| Tc00.1047053510763.109 | <i>T. cruzi</i> | 86  | 136 | 221 |
| Tc00.1047053510763.50  | <i>T. cruzi</i> | 50  | 100 | 149 |
| Tc00.1047053510763.50  | <i>T. cruzi</i> | 57  | 153 | 209 |
| Tc00.1047053510763.50  | <i>T. cruzi</i> | 57  | 153 | 209 |
| Tc00.1047053510763.60  | <i>T. cruzi</i> | 82  | 1   | 82  |
| Tc00.1047053510763.60  | <i>T. cruzi</i> | 66  | 176 | 241 |
| Tc00.1047053510763.60  | <i>T. cruzi</i> | 66  | 176 | 241 |

|                        |                 |     |      |      |
|------------------------|-----------------|-----|------|------|
| Tc00.1047053510765.50  | <i>T. cruzi</i> | 45  | 331  | 375  |
| Tc00.1047053510765.60  | <i>T. cruzi</i> | 72  | 238  | 309  |
| Tc00.1047053510767.10  | <i>T. cruzi</i> | 51  | 55   | 105  |
| Tc00.1047053510767.10  | <i>T. cruzi</i> | 46  | 175  | 220  |
| Tc00.1047053510767.10  | <i>T. cruzi</i> | 46  | 175  | 220  |
| Tc00.1047053510767.20  | <i>T. cruzi</i> | 46  | 1    | 46   |
| Tc00.1047053510767.20  | <i>T. cruzi</i> | 40  | 75   | 114  |
| Tc00.1047053510767.40  | <i>T. cruzi</i> | 265 | 310  | 574  |
| Tc00.1047053510767.60  | <i>T. cruzi</i> | 112 | 202  | 313  |
| Tc00.1047053510769.110 | <i>T. cruzi</i> | 58  | 1    | 58   |
| Tc00.1047053510769.110 | <i>T. cruzi</i> | 132 | 91   | 222  |
| Tc00.1047053510769.110 | <i>T. cruzi</i> | 45  | 411  | 455  |
| Tc00.1047053510769.120 | <i>T. cruzi</i> | 44  | 996  | 1039 |
| Tc00.1047053510769.130 | <i>T. cruzi</i> | 66  | 213  | 278  |
| Tc00.1047053510769.130 | <i>T. cruzi</i> | 109 | 457  | 565  |
| Tc00.1047053510769.130 | <i>T. cruzi</i> | 109 | 457  | 565  |
| Tc00.1047053510769.140 | <i>T. cruzi</i> | 186 | 99   | 284  |
| Tc00.1047053510769.30  | <i>T. cruzi</i> | 40  | 564  | 603  |
| Tc00.1047053510769.49  | <i>T. cruzi</i> | 115 | 136  | 250  |
| Tc00.1047053510769.80  | <i>T. cruzi</i> | 74  | 2982 | 3055 |
| Tc00.1047053510769.90  | <i>T. cruzi</i> | 66  | 1    | 66   |
| Tc00.1047053510773.100 | <i>T. cruzi</i> | 46  | 1    | 46   |
| Tc00.1047053510773.100 | <i>T. cruzi</i> | 93  | 485  | 577  |
| Tc00.1047053510773.100 | <i>T. cruzi</i> | 189 | 583  | 771  |
| Tc00.1047053510773.100 | <i>T. cruzi</i> | 392 | 912  | 1303 |
| Tc00.1047053510773.100 | <i>T. cruzi</i> | 189 | 1305 | 1493 |
| Tc00.1047053510773.110 | <i>T. cruzi</i> | 234 | 1    | 234  |
| Tc00.1047053510773.120 | <i>T. cruzi</i> | 541 | 1    | 541  |
| Tc00.1047053510773.120 | <i>T. cruzi</i> | 77  | 568  | 644  |
| Tc00.1047053510773.120 | <i>T. cruzi</i> | 40  | 702  | 741  |
| Tc00.1047053510773.120 | <i>T. cruzi</i> | 109 | 773  | 881  |
| Tc00.1047053510773.30  | <i>T. cruzi</i> | 93  | 1    | 93   |
| Tc00.1047053510773.30  | <i>T. cruzi</i> | 96  | 140  | 235  |
| Tc00.1047053510773.30  | <i>T. cruzi</i> | 144 | 276  | 419  |
| Tc00.1047053510773.40  | <i>T. cruzi</i> | 86  | 1    | 86   |
| Tc00.1047053510773.40  | <i>T. cruzi</i> | 78  | 162  | 239  |
| Tc00.1047053510773.40  | <i>T. cruzi</i> | 99  | 265  | 363  |
| Tc00.1047053510773.40  | <i>T. cruzi</i> | 163 | 396  | 558  |
| Tc00.1047053510773.50  | <i>T. cruzi</i> | 72  | 1    | 72   |
| Tc00.1047053510773.50  | <i>T. cruzi</i> | 148 | 139  | 286  |
| Tc00.1047053510773.50  | <i>T. cruzi</i> | 71  | 325  | 395  |
| Tc00.1047053510773.70  | <i>T. cruzi</i> | 64  | 403  | 466  |
| Tc00.1047053510773.70  | <i>T. cruzi</i> | 87  | 513  | 599  |
| Tc00.1047053510773.9   | <i>T. cruzi</i> | 90  | 13   | 102  |
| Tc00.1047053510777.20  | <i>T. cruzi</i> | 60  | 1    | 60   |
| Tc00.1047053510833.20  | <i>T. cruzi</i> | 204 | 27   | 230  |
| Tc00.1047053510839.20  | <i>T. cruzi</i> | 45  | 1    | 45   |

|                        |                 |      |      |      |
|------------------------|-----------------|------|------|------|
| Tc00.1047053510839.20  | <i>T. cruzi</i> | 138  | 94   | 231  |
| Tc00.1047053510839.20  | <i>T. cruzi</i> | 273  | 340  | 612  |
| Tc00.1047053510841.20  | <i>T. cruzi</i> | 65   | 211  | 275  |
| Tc00.1047053510841.30  | <i>T. cruzi</i> | 70   | 1    | 70   |
| Tc00.1047053510847.10  | <i>T. cruzi</i> | 303  | 671  | 973  |
| Tc00.1047053510847.20  | <i>T. cruzi</i> | 40   | 122  | 161  |
| Tc00.1047053510853.40  | <i>T. cruzi</i> | 42   | 1    | 42   |
| Tc00.1047053510853.40  | <i>T. cruzi</i> | 246  | 682  | 927  |
| Tc00.1047053510853.50  | <i>T. cruzi</i> | 52   | 110  | 161  |
| Tc00.1047053510855.4   | <i>T. cruzi</i> | 95   | 87   | 181  |
| Tc00.1047053510855.40  | <i>T. cruzi</i> | 166  | 177  | 342  |
| Tc00.1047053510857.20  | <i>T. cruzi</i> | 79   | 1    | 79   |
| Tc00.1047053510857.20  | <i>T. cruzi</i> | 76   | 153  | 228  |
| Tc00.1047053510857.20  | <i>T. cruzi</i> | 50   | 257  | 306  |
| Tc00.1047053510857.30  | <i>T. cruzi</i> | 216  | 340  | 555  |
| Tc00.1047053510857.30  | <i>T. cruzi</i> | 96   | 677  | 772  |
| Tc00.1047053510857.40  | <i>T. cruzi</i> | 109  | 73   | 181  |
| Tc00.1047053510857.40  | <i>T. cruzi</i> | 53   | 201  | 253  |
| Tc00.1047053510857.50  | <i>T. cruzi</i> | 56   | 282  | 337  |
| Tc00.1047053510859.10  | <i>T. cruzi</i> | 276  | 83   | 358  |
| Tc00.1047053510859.17  | <i>T. cruzi</i> | 257  | 83   | 339  |
| Tc00.1047053510859.24  | <i>T. cruzi</i> | 97   | 1    | 97   |
| Tc00.1047053510859.24  | <i>T. cruzi</i> | 40   | 582  | 621  |
| Tc00.1047053510859.24  | <i>T. cruzi</i> | 40   | 582  | 621  |
| Tc00.1047053510859.30  | <i>T. cruzi</i> | 42   | 1    | 42   |
| Tc00.1047053510859.30  | <i>T. cruzi</i> | 1021 | 84   | 1104 |
| Tc00.1047053510859.40  | <i>T. cruzi</i> | 52   | 1    | 52   |
| Tc00.1047053510859.40  | <i>T. cruzi</i> | 117  | 136  | 252  |
| Tc00.1047053510859.40  | <i>T. cruzi</i> | 54   | 265  | 318  |
| Tc00.1047053510859.40  | <i>T. cruzi</i> | 49   | 340  | 388  |
| Tc00.1047053510859.40  | <i>T. cruzi</i> | 48   | 852  | 899  |
| Tc00.1047053510859.40  | <i>T. cruzi</i> | 43   | 1109 | 1151 |
| Tc00.1047053510861.110 | <i>T. cruzi</i> | 58   | 45   | 102  |
| Tc00.1047053510861.110 | <i>T. cruzi</i> | 43   | 374  | 416  |
| Tc00.1047053510861.110 | <i>T. cruzi</i> | 43   | 374  | 416  |
| Tc00.1047053510861.125 | <i>T. cruzi</i> | 85   | 84   | 168  |
| Tc00.1047053510861.14  | <i>T. cruzi</i> | 60   | 74   | 133  |
| Tc00.1047053510861.14  | <i>T. cruzi</i> | 127  | 1168 | 1294 |
| Tc00.1047053510861.150 | <i>T. cruzi</i> | 94   | 15   | 108  |
| Tc00.1047053510861.150 | <i>T. cruzi</i> | 140  | 110  | 249  |
| Tc00.1047053510861.150 | <i>T. cruzi</i> | 79   | 293  | 371  |
| Tc00.1047053510861.150 | <i>T. cruzi</i> | 193  | 377  | 569  |
| Tc00.1047053510861.30  | <i>T. cruzi</i> | 81   | 109  | 189  |
| Tc00.1047053510861.60  | <i>T. cruzi</i> | 118  | 134  | 251  |
| Tc00.1047053510861.60  | <i>T. cruzi</i> | 80   | 378  | 457  |
| Tc00.1047053510861.60  | <i>T. cruzi</i> | 111  | 785  | 895  |
| Tc00.1047053510861.70  | <i>T. cruzi</i> | 110  | 442  | 551  |

|                        |                 |     |     |     |
|------------------------|-----------------|-----|-----|-----|
| Tc00.1047053510861.70  | <i>T. cruzi</i> | 44  | 621 | 664 |
| Tc00.1047053510861.70  | <i>T. cruzi</i> | 75  | 920 | 994 |
| Tc00.1047053510861.80  | <i>T. cruzi</i> | 45  | 98  | 142 |
| Tc00.1047053510861.80  | <i>T. cruzi</i> | 73  | 176 | 248 |
| Tc00.1047053510861.80  | <i>T. cruzi</i> | 73  | 176 | 248 |
| Tc00.1047053510861.94  | <i>T. cruzi</i> | 72  | 16  | 87  |
| Tc00.1047053510861.94  | <i>T. cruzi</i> | 62  | 270 | 331 |
| Tc00.1047053510861.94  | <i>T. cruzi</i> | 73  | 465 | 537 |
| Tc00.1047053510861.94  | <i>T. cruzi</i> | 62  | 784 | 845 |
| Tc00.1047053510863.20  | <i>T. cruzi</i> | 99  | 1   | 99  |
| Tc00.1047053510863.20  | <i>T. cruzi</i> | 54  | 160 | 213 |
| Tc00.1047053510863.20  | <i>T. cruzi</i> | 77  | 356 | 432 |
| Tc00.1047053510863.30  | <i>T. cruzi</i> | 154 | 1   | 154 |
| Tc00.1047053510863.9   | <i>T. cruzi</i> | 65  | 38  | 102 |
| Tc00.1047053510863.9   | <i>T. cruzi</i> | 153 | 104 | 256 |
| Tc00.1047053510877.100 | <i>T. cruzi</i> | 43  | 1   | 43  |
| Tc00.1047053510877.100 | <i>T. cruzi</i> | 134 | 132 | 265 |
| Tc00.1047053510877.110 | <i>T. cruzi</i> | 40  | 161 | 200 |
| Tc00.1047053510877.120 | <i>T. cruzi</i> | 55  | 332 | 386 |
| Tc00.1047053510877.130 | <i>T. cruzi</i> | 44  | 284 | 327 |
| Tc00.1047053510877.140 | <i>T. cruzi</i> | 66  | 71  | 136 |
| Tc00.1047053510877.140 | <i>T. cruzi</i> | 194 | 157 | 350 |
| Tc00.1047053510877.140 | <i>T. cruzi</i> | 270 | 381 | 650 |
| Tc00.1047053510877.150 | <i>T. cruzi</i> | 80  | 118 | 197 |
| Tc00.1047053510877.160 | <i>T. cruzi</i> | 113 | 102 | 214 |
| Tc00.1047053510877.170 | <i>T. cruzi</i> | 80  | 221 | 300 |
| Tc00.1047053510877.170 | <i>T. cruzi</i> | 52  | 501 | 552 |
| Tc00.1047053510877.170 | <i>T. cruzi</i> | 52  | 501 | 552 |
| Tc00.1047053510877.190 | <i>T. cruzi</i> | 168 | 78  | 245 |
| Tc00.1047053510877.20  | <i>T. cruzi</i> | 42  | 17  | 58  |
| Tc00.1047053510877.20  | <i>T. cruzi</i> | 277 | 154 | 430 |
| Tc00.1047053510877.20  | <i>T. cruzi</i> | 59  | 524 | 582 |
| Tc00.1047053510877.30  | <i>T. cruzi</i> | 103 | 128 | 230 |
| Tc00.1047053510877.40  | <i>T. cruzi</i> | 99  | 128 | 226 |
| Tc00.1047053510877.60  | <i>T. cruzi</i> | 51  | 1   | 51  |
| Tc00.1047053510877.60  | <i>T. cruzi</i> | 56  | 122 | 177 |
| Tc00.1047053510877.60  | <i>T. cruzi</i> | 56  | 122 | 177 |
| Tc00.1047053510879.100 | <i>T. cruzi</i> | 136 | 1   | 136 |
| Tc00.1047053510879.110 | <i>T. cruzi</i> | 50  | 1   | 50  |
| Tc00.1047053510879.110 | <i>T. cruzi</i> | 80  | 349 | 428 |
| Tc00.1047053510879.110 | <i>T. cruzi</i> | 80  | 349 | 428 |
| Tc00.1047053510879.120 | <i>T. cruzi</i> | 50  | 1   | 50  |
| Tc00.1047053510879.120 | <i>T. cruzi</i> | 80  | 349 | 428 |
| Tc00.1047053510879.120 | <i>T. cruzi</i> | 80  | 349 | 428 |
| Tc00.1047053510879.130 | <i>T. cruzi</i> | 42  | 376 | 417 |
| Tc00.1047053510879.160 | <i>T. cruzi</i> | 52  | 1   | 52  |
| Tc00.1047053510879.170 | <i>T. cruzi</i> | 106 | 111 | 216 |



|                        |                 |     |      |      |
|------------------------|-----------------|-----|------|------|
| Tc00.1047053510879.180 | <i>T. cruzi</i> | 254 | 28   | 281  |
| Tc00.1047053510879.200 | <i>T. cruzi</i> | 108 | 59   | 166  |
| Tc00.1047053510879.229 | <i>T. cruzi</i> | 67  | 1    | 67   |
| Tc00.1047053510879.229 | <i>T. cruzi</i> | 44  | 100  | 143  |
| Tc00.1047053510879.30  | <i>T. cruzi</i> | 42  | 80   | 121  |
| Tc00.1047053510879.30  | <i>T. cruzi</i> | 52  | 450  | 501  |
| Tc00.1047053510879.30  | <i>T. cruzi</i> | 52  | 450  | 501  |
| Tc00.1047053510879.40  | <i>T. cruzi</i> | 51  | 164  | 214  |
| Tc00.1047053510879.50  | <i>T. cruzi</i> | 231 | 36   | 266  |
| Tc00.1047053510911.40  | <i>T. cruzi</i> | 90  | 41   | 130  |
| Tc00.1047053510939.20  | <i>T. cruzi</i> | 83  | 94   | 176  |
| Tc00.1047053510939.20  | <i>T. cruzi</i> | 195 | 263  | 457  |
| Tc00.1047053510939.25  | <i>T. cruzi</i> | 159 | 18   | 176  |
| Tc00.1047053510939.30  | <i>T. cruzi</i> | 95  | 18   | 112  |
| Tc00.1047053510953.30  | <i>T. cruzi</i> | 108 | 224  | 331  |
| Tc00.1047053510953.40  | <i>T. cruzi</i> | 131 | 51   | 181  |
| Tc00.1047053510955.20  | <i>T. cruzi</i> | 46  | 98   | 143  |
| Tc00.1047053510955.20  | <i>T. cruzi</i> | 50  | 186  | 235  |
| Tc00.1047053510955.20  | <i>T. cruzi</i> | 246 | 326  | 571  |
| Tc00.1047053510955.20  | <i>T. cruzi</i> | 65  | 587  | 651  |
| Tc00.1047053510955.20  | <i>T. cruzi</i> | 44  | 661  | 704  |
| Tc00.1047053510955.50  | <i>T. cruzi</i> | 146 | 17   | 162  |
| Tc00.1047053510957.9   | <i>T. cruzi</i> | 190 | 1    | 190  |
| Tc00.1047053510959.30  | <i>T. cruzi</i> | 338 | 29   | 366  |
| Tc00.1047053510961.10  | <i>T. cruzi</i> | 384 | 26   | 409  |
| Tc00.1047053510961.30  | <i>T. cruzi</i> | 384 | 26   | 409  |
| Tc00.1047053510961.40  | <i>T. cruzi</i> | 130 | 19   | 148  |
| Tc00.1047053510963.10  | <i>T. cruzi</i> | 48  | 284  | 331  |
| Tc00.1047053510963.39  | <i>T. cruzi</i> | 134 | 92   | 225  |
| Tc00.1047053510963.60  | <i>T. cruzi</i> | 41  | 243  | 283  |
| Tc00.1047053510963.70  | <i>T. cruzi</i> | 50  | 1    | 50   |
| Tc00.1047053510963.90  | <i>T. cruzi</i> | 44  | 472  | 515  |
| Tc00.1047053510971.10  | <i>T. cruzi</i> | 43  | 437  | 479  |
| Tc00.1047053510971.10  | <i>T. cruzi</i> | 66  | 2860 | 2925 |
| Tc00.1047053510971.10  | <i>T. cruzi</i> | 73  | 3401 | 3473 |
| Tc00.1047053510971.69  | <i>T. cruzi</i> | 43  | 644  | 686  |
| Tc00.1047053510989.20  | <i>T. cruzi</i> | 44  | 1    | 44   |
| Tc00.1047053510989.20  | <i>T. cruzi</i> | 43  | 129  | 171  |
| Tc00.1047053510989.20  | <i>T. cruzi</i> | 142 | 861  | 1002 |
| Tc00.1047053510989.20  | <i>T. cruzi</i> | 232 | 1035 | 1266 |
| Tc00.1047053510989.30  | <i>T. cruzi</i> | 40  | 17   | 56   |
| Tc00.1047053510989.30  | <i>T. cruzi</i> | 103 | 231  | 333  |
| Tc00.1047053510989.30  | <i>T. cruzi</i> | 103 | 231  | 333  |
| Tc00.1047053510989.50  | <i>T. cruzi</i> | 47  | 80   | 126  |
| Tc00.1047053510989.50  | <i>T. cruzi</i> | 94  | 144  | 237  |
| Tc00.1047053510989.50  | <i>T. cruzi</i> | 53  | 255  | 307  |
| Tc00.1047053510989.50  | <i>T. cruzi</i> | 61  | 697  | 757  |

|                        |                 |     |      |      |
|------------------------|-----------------|-----|------|------|
| Tc00.1047053510989.50  | <i>T. cruzi</i> | 75  | 793  | 867  |
| Tc00.1047053510989.50  | <i>T. cruzi</i> | 154 | 898  | 1051 |
| Tc00.1047053510989.50  | <i>T. cruzi</i> | 74  | 1067 | 1140 |
| Tc00.1047053510989.50  | <i>T. cruzi</i> | 123 | 1176 | 1298 |
| Tc00.1047053510989.50  | <i>T. cruzi</i> | 44  | 1370 | 1413 |
| Tc00.1047053510989.50  | <i>T. cruzi</i> | 95  | 1449 | 1543 |
| Tc00.1047053510989.50  | <i>T. cruzi</i> | 71  | 1554 | 1624 |
| Tc00.1047053510989.60  | <i>T. cruzi</i> | 620 | 1    | 620  |
| Tc00.1047053510997.20  | <i>T. cruzi</i> | 92  | 111  | 202  |
| Tc00.1047053510997.30  | <i>T. cruzi</i> | 89  | 389  | 477  |
| Tc00.1047053510997.40  | <i>T. cruzi</i> | 51  | 226  | 276  |
| Tc00.1047053510999.19  | <i>T. cruzi</i> | 55  | 1    | 55   |
| Tc00.1047053510999.19  | <i>T. cruzi</i> | 46  | 102  | 147  |
| Tc00.1047053510999.30  | <i>T. cruzi</i> | 68  | 39   | 106  |
| Tc00.1047053510999.30  | <i>T. cruzi</i> | 41  | 393  | 433  |
| Tc00.1047053511001.100 | <i>T. cruzi</i> | 221 | 1    | 221  |
| Tc00.1047053511001.110 | <i>T. cruzi</i> | 105 | 33   | 137  |
| Tc00.1047053511001.130 | <i>T. cruzi</i> | 105 | 42   | 146  |
| Tc00.1047053511001.130 | <i>T. cruzi</i> | 54  | 287  | 340  |
| Tc00.1047053511001.130 | <i>T. cruzi</i> | 71  | 429  | 499  |
| Tc00.1047053511001.130 | <i>T. cruzi</i> | 40  | 545  | 584  |
| Tc00.1047053511001.130 | <i>T. cruzi</i> | 70  | 606  | 675  |
| Tc00.1047053511001.130 | <i>T. cruzi</i> | 56  | 679  | 734  |
| Tc00.1047053511001.130 | <i>T. cruzi</i> | 46  | 1062 | 1107 |
| Tc00.1047053511001.130 | <i>T. cruzi</i> | 94  | 1115 | 1208 |
| Tc00.1047053511001.130 | <i>T. cruzi</i> | 51  | 1568 | 1618 |
| Tc00.1047053511001.130 | <i>T. cruzi</i> | 72  | 1925 | 1996 |
| Tc00.1047053511001.140 | <i>T. cruzi</i> | 77  | 1    | 77   |
| Tc00.1047053511001.140 | <i>T. cruzi</i> | 207 | 168  | 374  |
| Tc00.1047053511001.150 | <i>T. cruzi</i> | 47  | 108  | 154  |
| Tc00.1047053511001.160 | <i>T. cruzi</i> | 48  | 257  | 304  |
| Tc00.1047053511001.160 | <i>T. cruzi</i> | 48  | 371  | 418  |
| Tc00.1047053511001.160 | <i>T. cruzi</i> | 43  | 435  | 477  |
| Tc00.1047053511001.160 | <i>T. cruzi</i> | 40  | 1157 | 1196 |
| Tc00.1047053511001.160 | <i>T. cruzi</i> | 69  | 2346 | 2414 |
| Tc00.1047053511001.160 | <i>T. cruzi</i> | 63  | 2592 | 2654 |
| Tc00.1047053511001.160 | <i>T. cruzi</i> | 151 | 2956 | 3106 |
| Tc00.1047053511001.160 | <i>T. cruzi</i> | 132 | 3789 | 3920 |
| Tc00.1047053511001.170 | <i>T. cruzi</i> | 145 | 1    | 145  |
| Tc00.1047053511001.170 | <i>T. cruzi</i> | 51  | 152  | 202  |
| Tc00.1047053511001.170 | <i>T. cruzi</i> | 117 | 252  | 368  |
| Tc00.1047053511001.170 | <i>T. cruzi</i> | 91  | 389  | 479  |
| Tc00.1047053511001.170 | <i>T. cruzi</i> | 435 | 492  | 926  |
| Tc00.1047053511001.170 | <i>T. cruzi</i> | 45  | 1029 | 1073 |
| Tc00.1047053511001.180 | <i>T. cruzi</i> | 41  | 657  | 697  |
| Tc00.1047053511001.190 | <i>T. cruzi</i> | 40  | 108  | 147  |
| Tc00.1047053511001.190 | <i>T. cruzi</i> | 51  | 197  | 247  |

|                        |                 |     |      |      |
|------------------------|-----------------|-----|------|------|
| Tc00.1047053511001.190 | <i>T. cruzi</i> | 51  | 197  | 247  |
| Tc00.1047053511001.220 | <i>T. cruzi</i> | 54  | 73   | 126  |
| Tc00.1047053511001.220 | <i>T. cruzi</i> | 58  | 441  | 498  |
| Tc00.1047053511001.220 | <i>T. cruzi</i> | 76  | 590  | 665  |
| Tc00.1047053511001.230 | <i>T. cruzi</i> | 55  | 54   | 108  |
| Tc00.1047053511001.230 | <i>T. cruzi</i> | 69  | 233  | 301  |
| Tc00.1047053511001.230 | <i>T. cruzi</i> | 197 | 420  | 616  |
| Tc00.1047053511001.30  | <i>T. cruzi</i> | 249 | 37   | 285  |
| Tc00.1047053511001.40  | <i>T. cruzi</i> | 43  | 1    | 43   |
| Tc00.1047053511001.40  | <i>T. cruzi</i> | 78  | 149  | 226  |
| Tc00.1047053511001.40  | <i>T. cruzi</i> | 234 | 262  | 495  |
| Tc00.1047053511001.50  | <i>T. cruzi</i> | 78  | 64   | 141  |
| Tc00.1047053511001.50  | <i>T. cruzi</i> | 43  | 198  | 240  |
| Tc00.1047053511001.50  | <i>T. cruzi</i> | 43  | 198  | 240  |
| Tc00.1047053511001.60  | <i>T. cruzi</i> | 82  | 578  | 659  |
| Tc00.1047053511001.70  | <i>T. cruzi</i> | 285 | 1    | 285  |
| Tc00.1047053511001.70  | <i>T. cruzi</i> | 211 | 296  | 506  |
| Tc00.1047053511001.70  | <i>T. cruzi</i> | 101 | 527  | 627  |
| Tc00.1047053511001.80  | <i>T. cruzi</i> | 56  | 1    | 56   |
| Tc00.1047053511001.80  | <i>T. cruzi</i> | 59  | 539  | 597  |
| Tc00.1047053511001.80  | <i>T. cruzi</i> | 59  | 539  | 597  |
| Tc00.1047053511001.90  | <i>T. cruzi</i> | 55  | 24   | 78   |
| Tc00.1047053511001.90  | <i>T. cruzi</i> | 52  | 117  | 168  |
| Tc00.1047053511001.90  | <i>T. cruzi</i> | 43  | 592  | 634  |
| Tc00.1047053511001.90  | <i>T. cruzi</i> | 75  | 1164 | 1238 |
| Tc00.1047053511001.90  | <i>T. cruzi</i> | 42  | 1269 | 1310 |
| Tc00.1047053511001.90  | <i>T. cruzi</i> | 48  | 1461 | 1508 |
| Tc00.1047053511001.90  | <i>T. cruzi</i> | 48  | 1600 | 1647 |
| Tc00.1047053511001.90  | <i>T. cruzi</i> | 334 | 1689 | 2022 |
| Tc00.1047053511001.90  | <i>T. cruzi</i> | 68  | 2050 | 2117 |
| Tc00.1047053511035.10  | <i>T. cruzi</i> | 43  | 254  | 296  |
| Tc00.1047053511037.30  | <i>T. cruzi</i> | 130 | 69   | 198  |
| Tc00.1047053511037.30  | <i>T. cruzi</i> | 108 | 280  | 387  |
| Tc00.1047053511037.30  | <i>T. cruzi</i> | 80  | 530  | 609  |
| Tc00.1047053511037.40  | <i>T. cruzi</i> | 135 | 1    | 135  |
| Tc00.1047053511037.40  | <i>T. cruzi</i> | 102 | 165  | 266  |
| Tc00.1047053511037.40  | <i>T. cruzi</i> | 59  | 327  | 385  |
| Tc00.1047053511037.40  | <i>T. cruzi</i> | 101 | 484  | 584  |
| Tc00.1047053511039.10  | <i>T. cruzi</i> | 67  | 37   | 103  |
| Tc00.1047053511039.10  | <i>T. cruzi</i> | 76  | 110  | 185  |
| Tc00.1047053511039.20  | <i>T. cruzi</i> | 266 | 1    | 266  |
| Tc00.1047053511039.39  | <i>T. cruzi</i> | 46  | 421  | 466  |
| Tc00.1047053511041.20  | <i>T. cruzi</i> | 167 | 65   | 231  |
| Tc00.1047053511041.30  | <i>T. cruzi</i> | 78  | 161  | 238  |
| Tc00.1047053511041.50  | <i>T. cruzi</i> | 122 | 101  | 222  |
| Tc00.1047053511041.50  | <i>T. cruzi</i> | 118 | 260  | 377  |
| Tc00.1047053511041.50  | <i>T. cruzi</i> | 256 | 386  | 641  |

|                        |                 |     |      |      |
|------------------------|-----------------|-----|------|------|
| Tc00.1047053511041.50  | <i>T. cruzi</i> | 109 | 668  | 776  |
| Tc00.1047053511043.10  | <i>T. cruzi</i> | 53  | 299  | 351  |
| Tc00.1047053511043.10  | <i>T. cruzi</i> | 100 | 353  | 452  |
| Tc00.1047053511043.10  | <i>T. cruzi</i> | 47  | 491  | 537  |
| Tc00.1047053511043.10  | <i>T. cruzi</i> | 68  | 550  | 617  |
| Tc00.1047053511043.20  | <i>T. cruzi</i> | 60  | 171  | 230  |
| Tc00.1047053511043.30  | <i>T. cruzi</i> | 59  | 50   | 108  |
| Tc00.1047053511043.30  | <i>T. cruzi</i> | 50  | 131  | 180  |
| Tc00.1047053511043.30  | <i>T. cruzi</i> | 50  | 131  | 180  |
| Tc00.1047053511045.10  | <i>T. cruzi</i> | 70  | 1    | 70   |
| Tc00.1047053511045.10  | <i>T. cruzi</i> | 110 | 93   | 202  |
| Tc00.1047053511045.10  | <i>T. cruzi</i> | 59  | 243  | 301  |
| Tc00.1047053511045.29  | <i>T. cruzi</i> | 50  | 199  | 248  |
| Tc00.1047053511045.40  | <i>T. cruzi</i> | 41  | 855  | 895  |
| Tc00.1047053511045.40  | <i>T. cruzi</i> | 45  | 1179 | 1223 |
| Tc00.1047053511045.40  | <i>T. cruzi</i> | 45  | 1179 | 1223 |
| Tc00.1047053511047.20  | <i>T. cruzi</i> | 253 | 95   | 347  |
| Tc00.1047053511047.50  | <i>T. cruzi</i> | 41  | 1    | 41   |
| Tc00.1047053511049.40  | <i>T. cruzi</i> | 40  | 105  | 144  |
| Tc00.1047053511051.20  | <i>T. cruzi</i> | 60  | 12   | 71   |
| Tc00.1047053511051.30  | <i>T. cruzi</i> | 42  | 232  | 273  |
| Tc00.1047053511051.59  | <i>T. cruzi</i> | 52  | 405  | 456  |
| Tc00.1047053511055.20  | <i>T. cruzi</i> | 43  | 398  | 440  |
| Tc00.1047053511065.10  | <i>T. cruzi</i> | 189 | 44   | 232  |
| Tc00.1047053511065.23  | <i>T. cruzi</i> | 81  | 23   | 103  |
| Tc00.1047053511065.23  | <i>T. cruzi</i> | 197 | 117  | 313  |
| Tc00.1047053511067.10  | <i>T. cruzi</i> | 56  | 1    | 56   |
| Tc00.1047053511067.10  | <i>T. cruzi</i> | 56  | 400  | 455  |
| Tc00.1047053511067.10  | <i>T. cruzi</i> | 47  | 880  | 926  |
| Tc00.1047053511067.20  | <i>T. cruzi</i> | 44  | 1    | 44   |
| Tc00.1047053511067.20  | <i>T. cruzi</i> | 58  | 86   | 143  |
| Tc00.1047053511069.10  | <i>T. cruzi</i> | 44  | 47   | 90   |
| Tc00.1047053511069.10  | <i>T. cruzi</i> | 62  | 165  | 226  |
| Tc00.1047053511069.10  | <i>T. cruzi</i> | 62  | 165  | 226  |
| Tc00.1047053511069.20  | <i>T. cruzi</i> | 47  | 1    | 47   |
| Tc00.1047053511069.20  | <i>T. cruzi</i> | 62  | 122  | 183  |
| Tc00.1047053511069.20  | <i>T. cruzi</i> | 62  | 122  | 183  |
| Tc00.1047053511071.100 | <i>T. cruzi</i> | 46  | 290  | 335  |
| Tc00.1047053511071.120 | <i>T. cruzi</i> | 85  | 63   | 147  |
| Tc00.1047053511071.130 | <i>T. cruzi</i> | 970 | 26   | 995  |
| Tc00.1047053511071.130 | <i>T. cruzi</i> | 377 | 1046 | 1422 |
| Tc00.1047053511071.150 | <i>T. cruzi</i> | 71  | 1    | 71   |
| Tc00.1047053511071.20  | <i>T. cruzi</i> | 88  | 222  | 309  |
| Tc00.1047053511075.20  | <i>T. cruzi</i> | 41  | 107  | 147  |
| Tc00.1047053511075.30  | <i>T. cruzi</i> | 48  | 757  | 804  |
| Tc00.1047053511075.54  | <i>T. cruzi</i> | 42  | 1    | 42   |
| Tc00.1047053511075.54  | <i>T. cruzi</i> | 87  | 84   | 170  |

|                        |                 |     |      |      |
|------------------------|-----------------|-----|------|------|
| Tc00.1047053511075.54  | <i>T. cruzi</i> | 87  | 84   | 170  |
| Tc00.1047053511107.30  | <i>T. cruzi</i> | 78  | 306  | 383  |
| Tc00.1047053511109.100 | <i>T. cruzi</i> | 55  | 15   | 69   |
| Tc00.1047053511109.100 | <i>T. cruzi</i> | 106 | 673  | 778  |
| Tc00.1047053511109.130 | <i>T. cruzi</i> | 49  | 1    | 49   |
| Tc00.1047053511109.130 | <i>T. cruzi</i> | 47  | 101  | 147  |
| Tc00.1047053511109.130 | <i>T. cruzi</i> | 44  | 223  | 266  |
| Tc00.1047053511109.130 | <i>T. cruzi</i> | 51  | 291  | 341  |
| Tc00.1047053511109.20  | <i>T. cruzi</i> | 57  | 81   | 137  |
| Tc00.1047053511109.30  | <i>T. cruzi</i> | 174 | 1    | 174  |
| Tc00.1047053511109.30  | <i>T. cruzi</i> | 61  | 291  | 351  |
| Tc00.1047053511109.30  | <i>T. cruzi</i> | 54  | 378  | 431  |
| Tc00.1047053511109.40  | <i>T. cruzi</i> | 197 | 1    | 197  |
| Tc00.1047053511109.60  | <i>T. cruzi</i> | 41  | 51   | 91   |
| Tc00.1047053511109.60  | <i>T. cruzi</i> | 45  | 252  | 296  |
| Tc00.1047053511109.60  | <i>T. cruzi</i> | 47  | 333  | 379  |
| Tc00.1047053511109.60  | <i>T. cruzi</i> | 91  | 658  | 748  |
| Tc00.1047053511109.60  | <i>T. cruzi</i> | 58  | 829  | 886  |
| Tc00.1047053511109.70  | <i>T. cruzi</i> | 547 | 13   | 559  |
| Tc00.1047053511109.70  | <i>T. cruzi</i> | 49  | 563  | 611  |
| Tc00.1047053511109.70  | <i>T. cruzi</i> | 171 | 699  | 869  |
| Tc00.1047053511109.70  | <i>T. cruzi</i> | 53  | 921  | 973  |
| Tc00.1047053511109.80  | <i>T. cruzi</i> | 161 | 1    | 161  |
| Tc00.1047053511109.80  | <i>T. cruzi</i> | 95  | 191  | 285  |
| Tc00.1047053511109.90  | <i>T. cruzi</i> | 177 | 49   | 225  |
| Tc00.1047053511111.10  | <i>T. cruzi</i> | 242 | 1    | 242  |
| Tc00.1047053511111.20  | <i>T. cruzi</i> | 40  | 1    | 40   |
| Tc00.1047053511111.20  | <i>T. cruzi</i> | 87  | 45   | 131  |
| Tc00.1047053511111.20  | <i>T. cruzi</i> | 87  | 45   | 131  |
| Tc00.1047053511111.30  | <i>T. cruzi</i> | 53  | 265  | 317  |
| Tc00.1047053511111.30  | <i>T. cruzi</i> | 48  | 458  | 505  |
| Tc00.1047053511111.30  | <i>T. cruzi</i> | 52  | 723  | 774  |
| Tc00.1047053511111.40  | <i>T. cruzi</i> | 74  | 1    | 74   |
| Tc00.1047053511111.40  | <i>T. cruzi</i> | 47  | 175  | 221  |
| Tc00.1047053511111.40  | <i>T. cruzi</i> | 47  | 175  | 221  |
| Tc00.1047053511111.50  | <i>T. cruzi</i> | 98  | 140  | 237  |
| Tc00.1047053511113.9   | <i>T. cruzi</i> | 52  | 1    | 52   |
| Tc00.1047053511113.9   | <i>T. cruzi</i> | 115 | 425  | 539  |
| Tc00.1047053511113.9   | <i>T. cruzi</i> | 40  | 813  | 852  |
| Tc00.1047053511113.9   | <i>T. cruzi</i> | 195 | 1991 | 2185 |
| Tc00.1047053511115.20  | <i>T. cruzi</i> | 95  | 119  | 213  |
| Tc00.1047053511115.20  | <i>T. cruzi</i> | 67  | 257  | 323  |
| Tc00.1047053511115.20  | <i>T. cruzi</i> | 46  | 352  | 397  |
| Tc00.1047053511115.40  | <i>T. cruzi</i> | 116 | 59   | 174  |
| Tc00.1047053511115.40  | <i>T. cruzi</i> | 166 | 269  | 434  |
| Tc00.1047053511115.40  | <i>T. cruzi</i> | 166 | 269  | 434  |
| Tc00.1047053511121.11  | <i>T. cruzi</i> | 73  | 1    | 73   |

|                        |                 |     |      |      |
|------------------------|-----------------|-----|------|------|
| Tc00.1047053511121.11  | <i>T. cruzi</i> | 46  | 158  | 203  |
| Tc00.1047053511121.30  | <i>T. cruzi</i> | 62  | 1    | 62   |
| Tc00.1047053511123.11  | <i>T. cruzi</i> | 42  | 1    | 42   |
| Tc00.1047053511123.11  | <i>T. cruzi</i> | 50  | 133  | 182  |
| Tc00.1047053511123.11  | <i>T. cruzi</i> | 57  | 298  | 354  |
| Tc00.1047053511125.9   | <i>T. cruzi</i> | 88  | 187  | 274  |
| Tc00.1047053511125.9   | <i>T. cruzi</i> | 49  | 1599 | 1647 |
| Tc00.1047053511125.9   | <i>T. cruzi</i> | 49  | 1599 | 1647 |
| Tc00.1047053511127.10  | <i>T. cruzi</i> | 151 | 90   | 240  |
| Tc00.1047053511127.100 | <i>T. cruzi</i> | 45  | 318  | 362  |
| Tc00.1047053511127.110 | <i>T. cruzi</i> | 47  | 169  | 215  |
| Tc00.1047053511127.120 | <i>T. cruzi</i> | 48  | 612  | 659  |
| Tc00.1047053511127.140 | <i>T. cruzi</i> | 67  | 1    | 67   |
| Tc00.1047053511127.140 | <i>T. cruzi</i> | 68  | 599  | 666  |
| Tc00.1047053511127.150 | <i>T. cruzi</i> | 65  | 45   | 109  |
| Tc00.1047053511127.150 | <i>T. cruzi</i> | 54  | 376  | 429  |
| Tc00.1047053511127.150 | <i>T. cruzi</i> | 54  | 376  | 429  |
| Tc00.1047053511127.180 | <i>T. cruzi</i> | 191 | 20   | 210  |
| Tc00.1047053511127.180 | <i>T. cruzi</i> | 57  | 391  | 447  |
| Tc00.1047053511127.190 | <i>T. cruzi</i> | 157 | 113  | 269  |
| Tc00.1047053511127.190 | <i>T. cruzi</i> | 55  | 369  | 423  |
| Tc00.1047053511127.20  | <i>T. cruzi</i> | 94  | 93   | 186  |
| Tc00.1047053511127.20  | <i>T. cruzi</i> | 316 | 267  | 582  |
| Tc00.1047053511127.200 | <i>T. cruzi</i> | 103 | 1    | 103  |
| Tc00.1047053511127.200 | <i>T. cruzi</i> | 97  | 524  | 620  |
| Tc00.1047053511127.200 | <i>T. cruzi</i> | 80  | 654  | 733  |
| Tc00.1047053511127.200 | <i>T. cruzi</i> | 55  | 791  | 845  |
| Tc00.1047053511127.200 | <i>T. cruzi</i> | 46  | 871  | 916  |
| Tc00.1047053511127.210 | <i>T. cruzi</i> | 62  | 109  | 170  |
| Tc00.1047053511127.220 | <i>T. cruzi</i> | 368 | 1    | 368  |
| Tc00.1047053511127.220 | <i>T. cruzi</i> | 89  | 584  | 672  |
| Tc00.1047053511127.230 | <i>T. cruzi</i> | 91  | 522  | 612  |
| Tc00.1047053511127.230 | <i>T. cruzi</i> | 55  | 644  | 698  |
| Tc00.1047053511127.240 | <i>T. cruzi</i> | 41  | 105  | 145  |
| Tc00.1047053511127.250 | <i>T. cruzi</i> | 102 | 1    | 102  |
| Tc00.1047053511127.250 | <i>T. cruzi</i> | 77  | 107  | 183  |
| Tc00.1047053511127.250 | <i>T. cruzi</i> | 77  | 107  | 183  |
| Tc00.1047053511127.260 | <i>T. cruzi</i> | 126 | 1    | 126  |
| Tc00.1047053511127.260 | <i>T. cruzi</i> | 70  | 129  | 198  |
| Tc00.1047053511127.260 | <i>T. cruzi</i> | 70  | 129  | 198  |
| Tc00.1047053511127.274 | <i>T. cruzi</i> | 116 | 65   | 180  |
| Tc00.1047053511127.280 | <i>T. cruzi</i> | 169 | 215  | 383  |
| Tc00.1047053511127.290 | <i>T. cruzi</i> | 149 | 102  | 250  |
| Tc00.1047053511127.290 | <i>T. cruzi</i> | 67  | 288  | 354  |
| Tc00.1047053511127.290 | <i>T. cruzi</i> | 74  | 469  | 542  |
| Tc00.1047053511127.290 | <i>T. cruzi</i> | 107 | 735  | 841  |
| Tc00.1047053511127.290 | <i>T. cruzi</i> | 103 | 1010 | 1112 |

|                        |                 |     |      |      |
|------------------------|-----------------|-----|------|------|
| Tc00.1047053511127.290 | <i>T. cruzi</i> | 67  | 1189 | 1255 |
| Tc00.1047053511127.30  | <i>T. cruzi</i> | 60  | 1    | 60   |
| Tc00.1047053511127.300 | <i>T. cruzi</i> | 78  | 112  | 189  |
| Tc00.1047053511127.300 | <i>T. cruzi</i> | 56  | 239  | 294  |
| Tc00.1047053511127.300 | <i>T. cruzi</i> | 56  | 239  | 294  |
| Tc00.1047053511127.320 | <i>T. cruzi</i> | 105 | 1    | 105  |
| Tc00.1047053511127.330 | <i>T. cruzi</i> | 105 | 17   | 121  |
| Tc00.1047053511127.340 | <i>T. cruzi</i> | 60  | 48   | 107  |
| Tc00.1047053511127.340 | <i>T. cruzi</i> | 42  | 408  | 449  |
| Tc00.1047053511127.340 | <i>T. cruzi</i> | 55  | 523  | 577  |
| Tc00.1047053511127.340 | <i>T. cruzi</i> | 163 | 598  | 760  |
| Tc00.1047053511127.350 | <i>T. cruzi</i> | 165 | 164  | 328  |
| Tc00.1047053511127.360 | <i>T. cruzi</i> | 42  | 110  | 151  |
| Tc00.1047053511127.360 | <i>T. cruzi</i> | 80  | 228  | 307  |
| Tc00.1047053511127.369 | <i>T. cruzi</i> | 50  | 29   | 78   |
| Tc00.1047053511127.369 | <i>T. cruzi</i> | 82  | 174  | 255  |
| Tc00.1047053511127.369 | <i>T. cruzi</i> | 118 | 322  | 439  |
| Tc00.1047053511127.380 | <i>T. cruzi</i> | 62  | 1    | 62   |
| Tc00.1047053511127.380 | <i>T. cruzi</i> | 231 | 206  | 436  |
| Tc00.1047053511127.380 | <i>T. cruzi</i> | 99  | 487  | 585  |
| Tc00.1047053511127.380 | <i>T. cruzi</i> | 184 | 697  | 880  |
| Tc00.1047053511127.390 | <i>T. cruzi</i> | 54  | 131  | 184  |
| Tc00.1047053511127.390 | <i>T. cruzi</i> | 53  | 481  | 533  |
| Tc00.1047053511127.390 | <i>T. cruzi</i> | 128 | 564  | 691  |
| Tc00.1047053511127.390 | <i>T. cruzi</i> | 51  | 1550 | 1600 |
| Tc00.1047053511127.390 | <i>T. cruzi</i> | 53  | 1695 | 1747 |
| Tc00.1047053511127.390 | <i>T. cruzi</i> | 115 | 1945 | 2059 |
| Tc00.1047053511127.390 | <i>T. cruzi</i> | 45  | 2093 | 2137 |
| Tc00.1047053511127.40  | <i>T. cruzi</i> | 246 | 20   | 265  |
| Tc00.1047053511127.400 | <i>T. cruzi</i> | 84  | 1    | 84   |
| Tc00.1047053511127.400 | <i>T. cruzi</i> | 58  | 112  | 169  |
| Tc00.1047053511127.400 | <i>T. cruzi</i> | 54  | 199  | 252  |
| Tc00.1047053511127.400 | <i>T. cruzi</i> | 44  | 623  | 666  |
| Tc00.1047053511127.410 | <i>T. cruzi</i> | 43  | 1    | 43   |
| Tc00.1047053511127.410 | <i>T. cruzi</i> | 201 | 230  | 430  |
| Tc00.1047053511127.50  | <i>T. cruzi</i> | 145 | 20   | 164  |
| Tc00.1047053511127.50  | <i>T. cruzi</i> | 318 | 177  | 494  |
| Tc00.1047053511127.50  | <i>T. cruzi</i> | 132 | 517  | 648  |
| Tc00.1047053511127.60  | <i>T. cruzi</i> | 528 | 352  | 879  |
| Tc00.1047053511127.70  | <i>T. cruzi</i> | 59  | 1    | 59   |
| Tc00.1047053511127.70  | <i>T. cruzi</i> | 115 | 254  | 368  |
| Tc00.1047053511127.90  | <i>T. cruzi</i> | 57  | 83   | 139  |
| Tc00.1047053511127.90  | <i>T. cruzi</i> | 109 | 174  | 282  |
| Tc00.1047053511127.90  | <i>T. cruzi</i> | 109 | 174  | 282  |
| Tc00.1047053511129.40  | <i>T. cruzi</i> | 44  | 1    | 44   |
| Tc00.1047053511129.40  | <i>T. cruzi</i> | 274 | 726  | 999  |
| Tc00.1047053511131.20  | <i>T. cruzi</i> | 42  | 111  | 152  |

|                       |                 |     |      |      |
|-----------------------|-----------------|-----|------|------|
| Tc00.1047053511131.20 | <i>T. cruzi</i> | 40  | 166  | 205  |
| Tc00.1047053511131.20 | <i>T. cruzi</i> | 66  | 264  | 329  |
| Tc00.1047053511131.20 | <i>T. cruzi</i> | 64  | 534  | 597  |
| Tc00.1047053511131.30 | <i>T. cruzi</i> | 345 | 304  | 648  |
| Tc00.1047053511131.30 | <i>T. cruzi</i> | 80  | 1118 | 1197 |
| Tc00.1047053511131.30 | <i>T. cruzi</i> | 50  | 1215 | 1264 |
| Tc00.1047053511131.30 | <i>T. cruzi</i> | 66  | 1362 | 1427 |
| Tc00.1047053511131.50 | <i>T. cruzi</i> | 47  | 64   | 110  |
| Tc00.1047053511131.50 | <i>T. cruzi</i> | 69  | 529  | 597  |
| Tc00.1047053511131.60 | <i>T. cruzi</i> | 121 | 38   | 158  |
| Tc00.1047053511131.60 | <i>T. cruzi</i> | 205 | 175  | 379  |
| Tc00.1047053511131.60 | <i>T. cruzi</i> | 68  | 383  | 450  |
| Tc00.1047053511131.70 | <i>T. cruzi</i> | 134 | 107  | 240  |
| Tc00.1047053511131.80 | <i>T. cruzi</i> | 302 | 43   | 344  |
| Tc00.1047053511131.80 | <i>T. cruzi</i> | 492 | 353  | 844  |
| Tc00.1047053511131.80 | <i>T. cruzi</i> | 530 | 909  | 1438 |
| Tc00.1047053511131.80 | <i>T. cruzi</i> | 94  | 1481 | 1574 |
| Tc00.1047053511131.89 | <i>T. cruzi</i> | 68  | 1    | 68   |
| Tc00.1047053511131.89 | <i>T. cruzi</i> | 207 | 106  | 312  |
| Tc00.1047053511131.89 | <i>T. cruzi</i> | 92  | 444  | 535  |
| Tc00.1047053511133.10 | <i>T. cruzi</i> | 101 | 1    | 101  |
| Tc00.1047053511133.10 | <i>T. cruzi</i> | 75  | 130  | 204  |
| Tc00.1047053511133.20 | <i>T. cruzi</i> | 87  | 329  | 415  |
| Tc00.1047053511133.30 | <i>T. cruzi</i> | 275 | 1    | 275  |
| Tc00.1047053511133.30 | <i>T. cruzi</i> | 59  | 381  | 439  |
| Tc00.1047053511133.30 | <i>T. cruzi</i> | 115 | 464  | 578  |
| Tc00.1047053511133.30 | <i>T. cruzi</i> | 73  | 665  | 737  |
| Tc00.1047053511133.30 | <i>T. cruzi</i> | 77  | 741  | 817  |
| Tc00.1047053511133.30 | <i>T. cruzi</i> | 220 | 878  | 1097 |
| Tc00.1047053511133.30 | <i>T. cruzi</i> | 100 | 1145 | 1244 |
| Tc00.1047053511133.30 | <i>T. cruzi</i> | 63  | 1263 | 1325 |
| Tc00.1047053511133.30 | <i>T. cruzi</i> | 73  | 1400 | 1472 |
| Tc00.1047053511133.4  | <i>T. cruzi</i> | 68  | 161  | 228  |
| Tc00.1047053511135.20 | <i>T. cruzi</i> | 124 | 166  | 289  |
| Tc00.1047053511135.20 | <i>T. cruzi</i> | 205 | 314  | 518  |
| Tc00.1047053511135.30 | <i>T. cruzi</i> | 71  | 1    | 71   |
| Tc00.1047053511137.10 | <i>T. cruzi</i> | 40  | 52   | 91   |
| Tc00.1047053511137.10 | <i>T. cruzi</i> | 63  | 164  | 226  |
| Tc00.1047053511137.10 | <i>T. cruzi</i> | 63  | 164  | 226  |
| Tc00.1047053511137.20 | <i>T. cruzi</i> | 94  | 266  | 359  |
| Tc00.1047053511139.30 | <i>T. cruzi</i> | 170 | 227  | 396  |
| Tc00.1047053511141.10 | <i>T. cruzi</i> | 93  | 1    | 93   |
| Tc00.1047053511141.10 | <i>T. cruzi</i> | 89  | 181  | 269  |
| Tc00.1047053511141.10 | <i>T. cruzi</i> | 136 | 310  | 445  |
| Tc00.1047053511143.12 | <i>T. cruzi</i> | 409 | 85   | 493  |
| Tc00.1047053511143.12 | <i>T. cruzi</i> | 45  | 513  | 557  |
| Tc00.1047053511143.19 | <i>T. cruzi</i> | 59  | 1    | 59   |



|                        |                 |     |     |     |
|------------------------|-----------------|-----|-----|-----|
| Tc00.1047053511143.30  | <i>T. cruzi</i> | 45  | 15  | 59  |
| Tc00.1047053511145.20  | <i>T. cruzi</i> | 66  | 1   | 66  |
| Tc00.1047053511145.30  | <i>T. cruzi</i> | 176 | 1   | 176 |
| Tc00.1047053511145.30  | <i>T. cruzi</i> | 128 | 212 | 339 |
| Tc00.1047053511145.30  | <i>T. cruzi</i> | 57  | 364 | 420 |
| Tc00.1047053511145.30  | <i>T. cruzi</i> | 227 | 487 | 713 |
| Tc00.1047053511145.40  | <i>T. cruzi</i> | 44  | 1   | 44  |
| Tc00.1047053511145.40  | <i>T. cruzi</i> | 171 | 175 | 345 |
| Tc00.1047053511145.89  | <i>T. cruzi</i> | 175 | 1   | 175 |
| Tc00.1047053511171.90  | <i>T. cruzi</i> | 218 | 24  | 241 |
| Tc00.1047053511173.100 | <i>T. cruzi</i> | 326 | 70  | 395 |
| Tc00.1047053511173.110 | <i>T. cruzi</i> | 176 | 25  | 200 |
| Tc00.1047053511173.130 | <i>T. cruzi</i> | 45  | 1   | 45  |
| Tc00.1047053511173.130 | <i>T. cruzi</i> | 40  | 127 | 166 |
| Tc00.1047053511173.130 | <i>T. cruzi</i> | 78  | 257 | 334 |
| Tc00.1047053511173.130 | <i>T. cruzi</i> | 185 | 729 | 913 |
| Tc00.1047053511173.150 | <i>T. cruzi</i> | 311 | 34  | 344 |
| Tc00.1047053511173.180 | <i>T. cruzi</i> | 349 | 30  | 378 |
| Tc00.1047053511173.200 | <i>T. cruzi</i> | 64  | 39  | 102 |
| Tc00.1047053511173.210 | <i>T. cruzi</i> | 314 | 31  | 344 |
| Tc00.1047053511173.24  | <i>T. cruzi</i> | 524 | 41  | 564 |
| Tc00.1047053511173.270 | <i>T. cruzi</i> | 233 | 25  | 257 |
| Tc00.1047053511173.280 | <i>T. cruzi</i> | 78  | 1   | 78  |
| Tc00.1047053511173.280 | <i>T. cruzi</i> | 160 | 727 | 886 |
| Tc00.1047053511173.360 | <i>T. cruzi</i> | 235 | 24  | 258 |
| Tc00.1047053511173.370 | <i>T. cruzi</i> | 53  | 1   | 53  |
| Tc00.1047053511173.370 | <i>T. cruzi</i> | 46  | 127 | 172 |
| Tc00.1047053511173.370 | <i>T. cruzi</i> | 88  | 408 | 495 |
| Tc00.1047053511173.370 | <i>T. cruzi</i> | 210 | 711 | 920 |
| Tc00.1047053511173.400 | <i>T. cruzi</i> | 232 | 26  | 257 |
| Tc00.1047053511173.420 | <i>T. cruzi</i> | 176 | 26  | 201 |
| Tc00.1047053511173.430 | <i>T. cruzi</i> | 424 | 47  | 470 |
| Tc00.1047053511173.440 | <i>T. cruzi</i> | 42  | 1   | 42  |
| Tc00.1047053511173.440 | <i>T. cruzi</i> | 41  | 594 | 634 |
| Tc00.1047053511173.440 | <i>T. cruzi</i> | 41  | 594 | 634 |
| Tc00.1047053511173.460 | <i>T. cruzi</i> | 314 | 31  | 344 |
| Tc00.1047053511173.470 | <i>T. cruzi</i> | 44  | 1   | 44  |
| Tc00.1047053511173.470 | <i>T. cruzi</i> | 40  | 127 | 166 |
| Tc00.1047053511173.470 | <i>T. cruzi</i> | 55  | 258 | 312 |
| Tc00.1047053511173.470 | <i>T. cruzi</i> | 185 | 727 | 911 |
| Tc00.1047053511173.496 | <i>T. cruzi</i> | 163 | 66  | 228 |
| Tc00.1047053511173.50  | <i>T. cruzi</i> | 353 | 72  | 424 |
| Tc00.1047053511173.64  | <i>T. cruzi</i> | 228 | 26  | 253 |
| Tc00.1047053511173.80  | <i>T. cruzi</i> | 45  | 1   | 45  |
| Tc00.1047053511173.80  | <i>T. cruzi</i> | 73  | 257 | 329 |
| Tc00.1047053511173.80  | <i>T. cruzi</i> | 41  | 413 | 453 |
| Tc00.1047053511173.80  | <i>T. cruzi</i> | 185 | 730 | 914 |

|                        |                 |     |      |      |
|------------------------|-----------------|-----|------|------|
| Tc00.1047053511175.20  | <i>T. cruzi</i> | 57  | 34   | 90   |
| Tc00.1047053511175.20  | <i>T. cruzi</i> | 57  | 95   | 151  |
| Tc00.1047053511175.40  | <i>T. cruzi</i> | 166 | 29   | 194  |
| Tc00.1047053511179.130 | <i>T. cruzi</i> | 40  | 1    | 40   |
| Tc00.1047053511179.130 | <i>T. cruzi</i> | 51  | 149  | 199  |
| Tc00.1047053511179.130 | <i>T. cruzi</i> | 51  | 149  | 199  |
| Tc00.1047053511179.140 | <i>T. cruzi</i> | 76  | 303  | 378  |
| Tc00.1047053511179.140 | <i>T. cruzi</i> | 57  | 411  | 467  |
| Tc00.1047053511179.140 | <i>T. cruzi</i> | 57  | 411  | 467  |
| Tc00.1047053511179.60  | <i>T. cruzi</i> | 139 | 1    | 139  |
| Tc00.1047053511181.10  | <i>T. cruzi</i> | 49  | 275  | 323  |
| Tc00.1047053511181.10  | <i>T. cruzi</i> | 340 | 467  | 806  |
| Tc00.1047053511181.10  | <i>T. cruzi</i> | 193 | 857  | 1049 |
| Tc00.1047053511181.100 | <i>T. cruzi</i> | 63  | 198  | 260  |
| Tc00.1047053511181.110 | <i>T. cruzi</i> | 78  | 1    | 78   |
| Tc00.1047053511181.110 | <i>T. cruzi</i> | 91  | 255  | 345  |
| Tc00.1047053511181.110 | <i>T. cruzi</i> | 147 | 440  | 586  |
| Tc00.1047053511181.110 | <i>T. cruzi</i> | 78  | 595  | 672  |
| Tc00.1047053511181.110 | <i>T. cruzi</i> | 79  | 681  | 759  |
| Tc00.1047053511181.110 | <i>T. cruzi</i> | 79  | 767  | 845  |
| Tc00.1047053511181.110 | <i>T. cruzi</i> | 53  | 853  | 905  |
| Tc00.1047053511181.110 | <i>T. cruzi</i> | 58  | 1293 | 1350 |
| Tc00.1047053511181.110 | <i>T. cruzi</i> | 95  | 1432 | 1526 |
| Tc00.1047053511181.110 | <i>T. cruzi</i> | 144 | 1596 | 1739 |
| Tc00.1047053511181.110 | <i>T. cruzi</i> | 87  | 1887 | 1973 |
| Tc00.1047053511181.110 | <i>T. cruzi</i> | 129 | 2027 | 2155 |
| Tc00.1047053511181.140 | <i>T. cruzi</i> | 43  | 42   | 84   |
| Tc00.1047053511181.140 | <i>T. cruzi</i> | 43  | 119  | 161  |
| Tc00.1047053511181.140 | <i>T. cruzi</i> | 43  | 196  | 238  |
| Tc00.1047053511181.140 | <i>T. cruzi</i> | 81  | 274  | 354  |
| Tc00.1047053511181.140 | <i>T. cruzi</i> | 86  | 375  | 460  |
| Tc00.1047053511181.140 | <i>T. cruzi</i> | 154 | 521  | 674  |
| Tc00.1047053511181.40  | <i>T. cruzi</i> | 69  | 1    | 69   |
| Tc00.1047053511181.40  | <i>T. cruzi</i> | 66  | 91   | 156  |
| Tc00.1047053511181.40  | <i>T. cruzi</i> | 91  | 170  | 260  |
| Tc00.1047053511181.40  | <i>T. cruzi</i> | 61  | 287  | 347  |
| Tc00.1047053511181.60  | <i>T. cruzi</i> | 84  | 1    | 84   |
| Tc00.1047053511181.60  | <i>T. cruzi</i> | 70  | 149  | 218  |
| Tc00.1047053511181.60  | <i>T. cruzi</i> | 51  | 337  | 387  |
| Tc00.1047053511181.60  | <i>T. cruzi</i> | 92  | 564  | 655  |
| Tc00.1047053511181.70  | <i>T. cruzi</i> | 103 | 215  | 317  |
| Tc00.1047053511181.80  | <i>T. cruzi</i> | 40  | 1    | 40   |
| Tc00.1047053511181.80  | <i>T. cruzi</i> | 50  | 527  | 576  |
| Tc00.1047053511181.80  | <i>T. cruzi</i> | 46  | 623  | 668  |
| Tc00.1047053511181.90  | <i>T. cruzi</i> | 346 | 23   | 368  |
| Tc00.1047053511189.20  | <i>T. cruzi</i> | 110 | 1    | 110  |
| Tc00.1047053511189.20  | <i>T. cruzi</i> | 161 | 267  | 427  |

|                        |                 |     |     |      |
|------------------------|-----------------|-----|-----|------|
| Tc00.1047053511189.60  | <i>T. cruzi</i> | 82  | 234 | 315  |
| Tc00.1047053511189.70  | <i>T. cruzi</i> | 126 | 35  | 160  |
| Tc00.1047053511189.70  | <i>T. cruzi</i> | 400 | 319 | 718  |
| Tc00.1047053511189.70  | <i>T. cruzi</i> | 60  | 768 | 827  |
| Tc00.1047053511189.70  | <i>T. cruzi</i> | 58  | 894 | 951  |
| Tc00.1047053511189.70  | <i>T. cruzi</i> | 40  | 998 | 1037 |
| Tc00.1047053511197.60  | <i>T. cruzi</i> | 375 | 32  | 406  |
| Tc00.1047053511199.20  | <i>T. cruzi</i> | 52  | 28  | 79   |
| Tc00.1047053511199.20  | <i>T. cruzi</i> | 40  | 178 | 217  |
| Tc00.1047053511199.20  | <i>T. cruzi</i> | 70  | 279 | 348  |
| Tc00.1047053511199.20  | <i>T. cruzi</i> | 206 | 355 | 560  |
| Tc00.1047053511201.19  | <i>T. cruzi</i> | 63  | 378 | 440  |
| Tc00.1047053511201.40  | <i>T. cruzi</i> | 119 | 113 | 231  |
| Tc00.1047053511201.58  | <i>T. cruzi</i> | 223 | 171 | 393  |
| Tc00.1047053511201.58  | <i>T. cruzi</i> | 107 | 423 | 529  |
| Tc00.1047053511211.10  | <i>T. cruzi</i> | 46  | 1   | 46   |
| Tc00.1047053511211.10  | <i>T. cruzi</i> | 73  | 604 | 676  |
| Tc00.1047053511211.10  | <i>T. cruzi</i> | 73  | 604 | 676  |
| Tc00.1047053511211.110 | <i>T. cruzi</i> | 90  | 463 | 552  |
| Tc00.1047053511211.150 | <i>T. cruzi</i> | 43  | 1   | 43   |
| Tc00.1047053511211.150 | <i>T. cruzi</i> | 125 | 47  | 171  |
| Tc00.1047053511211.150 | <i>T. cruzi</i> | 125 | 47  | 171  |
| Tc00.1047053511211.160 | <i>T. cruzi</i> | 91  | 242 | 332  |
| Tc00.1047053511211.160 | <i>T. cruzi</i> | 146 | 509 | 654  |
| Tc00.1047053511211.170 | <i>T. cruzi</i> | 40  | 242 | 281  |
| Tc00.1047053511211.170 | <i>T. cruzi</i> | 170 | 508 | 677  |
| Tc00.1047053511211.180 | <i>T. cruzi</i> | 402 | 1   | 402  |
| Tc00.1047053511211.180 | <i>T. cruzi</i> | 124 | 474 | 597  |
| Tc00.1047053511211.20  | <i>T. cruzi</i> | 59  | 578 | 636  |
| Tc00.1047053511211.200 | <i>T. cruzi</i> | 61  | 1   | 61   |
| Tc00.1047053511211.210 | <i>T. cruzi</i> | 79  | 37  | 115  |
| Tc00.1047053511211.220 | <i>T. cruzi</i> | 70  | 611 | 680  |
| Tc00.1047053511211.230 | <i>T. cruzi</i> | 120 | 1   | 120  |
| Tc00.1047053511211.230 | <i>T. cruzi</i> | 53  | 124 | 176  |
| Tc00.1047053511211.230 | <i>T. cruzi</i> | 55  | 311 | 365  |
| Tc00.1047053511211.230 | <i>T. cruzi</i> | 67  | 622 | 688  |
| Tc00.1047053511211.230 | <i>T. cruzi</i> | 78  | 772 | 849  |
| Tc00.1047053511211.235 | <i>T. cruzi</i> | 67  | 109 | 175  |
| Tc00.1047053511211.235 | <i>T. cruzi</i> | 198 | 206 | 403  |
| Tc00.1047053511211.30  | <i>T. cruzi</i> | 56  | 23  | 78   |
| Tc00.1047053511211.30  | <i>T. cruzi</i> | 85  | 94  | 178  |
| Tc00.1047053511211.30  | <i>T. cruzi</i> | 85  | 94  | 178  |
| Tc00.1047053511211.40  | <i>T. cruzi</i> | 133 | 1   | 133  |
| Tc00.1047053511211.40  | <i>T. cruzi</i> | 43  | 152 | 194  |
| Tc00.1047053511211.40  | <i>T. cruzi</i> | 453 | 326 | 778  |
| Tc00.1047053511211.80  | <i>T. cruzi</i> | 72  | 148 | 219  |
| Tc00.1047053511211.80  | <i>T. cruzi</i> | 43  | 276 | 318  |

|                        |                 |     |      |      |
|------------------------|-----------------|-----|------|------|
| Tc00.1047053511211.80  | <i>T. cruzi</i> | 43  | 276  | 318  |
| Tc00.1047053511213.50  | <i>T. cruzi</i> | 136 | 49   | 184  |
| Tc00.1047053511213.60  | <i>T. cruzi</i> | 376 | 77   | 452  |
| Tc00.1047053511213.89  | <i>T. cruzi</i> | 51  | 248  | 298  |
| Tc00.1047053511215.10  | <i>T. cruzi</i> | 42  | 43   | 84   |
| Tc00.1047053511215.10  | <i>T. cruzi</i> | 58  | 289  | 346  |
| Tc00.1047053511215.10  | <i>T. cruzi</i> | 51  | 735  | 785  |
| Tc00.1047053511215.10  | <i>T. cruzi</i> | 73  | 1004 | 1076 |
| Tc00.1047053511215.100 | <i>T. cruzi</i> | 160 | 1    | 160  |
| Tc00.1047053511215.100 | <i>T. cruzi</i> | 43  | 172  | 214  |
| Tc00.1047053511215.110 | <i>T. cruzi</i> | 80  | 1    | 80   |
| Tc00.1047053511215.110 | <i>T. cruzi</i> | 66  | 106  | 171  |
| Tc00.1047053511215.110 | <i>T. cruzi</i> | 62  | 196  | 257  |
| Tc00.1047053511215.110 | <i>T. cruzi</i> | 65  | 420  | 484  |
| Tc00.1047053511215.110 | <i>T. cruzi</i> | 47  | 834  | 880  |
| Tc00.1047053511215.110 | <i>T. cruzi</i> | 50  | 1191 | 1240 |
| Tc00.1047053511215.119 | <i>T. cruzi</i> | 119 | 260  | 378  |
| Tc00.1047053511215.119 | <i>T. cruzi</i> | 43  | 487  | 529  |
| Tc00.1047053511215.119 | <i>T. cruzi</i> | 56  | 545  | 600  |
| Tc00.1047053511215.20  | <i>T. cruzi</i> | 101 | 161  | 261  |
| Tc00.1047053511215.20  | <i>T. cruzi</i> | 42  | 1267 | 1308 |
| Tc00.1047053511215.20  | <i>T. cruzi</i> | 105 | 1438 | 1542 |
| Tc00.1047053511215.20  | <i>T. cruzi</i> | 43  | 1620 | 1662 |
| Tc00.1047053511215.20  | <i>T. cruzi</i> | 52  | 1753 | 1804 |
| Tc00.1047053511215.30  | <i>T. cruzi</i> | 70  | 13   | 82   |
| Tc00.1047053511215.30  | <i>T. cruzi</i> | 55  | 161  | 215  |
| Tc00.1047053511215.30  | <i>T. cruzi</i> | 55  | 161  | 215  |
| Tc00.1047053511215.60  | <i>T. cruzi</i> | 76  | 223  | 298  |
| Tc00.1047053511215.70  | <i>T. cruzi</i> | 139 | 1    | 139  |
| Tc00.1047053511215.70  | <i>T. cruzi</i> | 667 | 541  | 1207 |
| Tc00.1047053511215.90  | <i>T. cruzi</i> | 66  | 88   | 153  |
| Tc00.1047053511217.100 | <i>T. cruzi</i> | 56  | 1    | 56   |
| Tc00.1047053511217.100 | <i>T. cruzi</i> | 156 | 263  | 418  |
| Tc00.1047053511217.100 | <i>T. cruzi</i> | 57  | 530  | 586  |
| Tc00.1047053511217.100 | <i>T. cruzi</i> | 53  | 637  | 689  |
| Tc00.1047053511217.100 | <i>T. cruzi</i> | 49  | 1057 | 1105 |
| Tc00.1047053511217.110 | <i>T. cruzi</i> | 75  | 34   | 108  |
| Tc00.1047053511217.110 | <i>T. cruzi</i> | 59  | 202  | 260  |
| Tc00.1047053511217.110 | <i>T. cruzi</i> | 60  | 276  | 335  |
| Tc00.1047053511217.110 | <i>T. cruzi</i> | 47  | 478  | 524  |
| Tc00.1047053511217.110 | <i>T. cruzi</i> | 101 | 805  | 905  |
| Tc00.1047053511217.110 | <i>T. cruzi</i> | 96  | 929  | 1024 |
| Tc00.1047053511217.120 | <i>T. cruzi</i> | 78  | 248  | 325  |
| Tc00.1047053511217.130 | <i>T. cruzi</i> | 99  | 58   | 156  |
| Tc00.1047053511217.130 | <i>T. cruzi</i> | 67  | 416  | 482  |
| Tc00.1047053511217.130 | <i>T. cruzi</i> | 111 | 896  | 1006 |
| Tc00.1047053511217.140 | <i>T. cruzi</i> | 162 | 136  | 297  |

|                        |                 |     |      |      |
|------------------------|-----------------|-----|------|------|
| Tc00.1047053511217.150 | <i>T. cruzi</i> | 63  | 80   | 142  |
| Tc00.1047053511217.160 | <i>T. cruzi</i> | 192 | 238  | 429  |
| Tc00.1047053511217.160 | <i>T. cruzi</i> | 63  | 452  | 514  |
| Tc00.1047053511217.160 | <i>T. cruzi</i> | 89  | 537  | 625  |
| Tc00.1047053511217.170 | <i>T. cruzi</i> | 113 | 1    | 113  |
| Tc00.1047053511217.170 | <i>T. cruzi</i> | 51  | 190  | 240  |
| Tc00.1047053511217.170 | <i>T. cruzi</i> | 93  | 266  | 358  |
| Tc00.1047053511217.170 | <i>T. cruzi</i> | 163 | 402  | 564  |
| Tc00.1047053511217.180 | <i>T. cruzi</i> | 113 | 8    | 120  |
| Tc00.1047053511217.180 | <i>T. cruzi</i> | 45  | 185  | 229  |
| Tc00.1047053511217.180 | <i>T. cruzi</i> | 45  | 185  | 229  |
| Tc00.1047053511217.20  | <i>T. cruzi</i> | 100 | 22   | 121  |
| Tc00.1047053511217.20  | <i>T. cruzi</i> | 139 | 256  | 394  |
| Tc00.1047053511217.20  | <i>T. cruzi</i> | 58  | 514  | 571  |
| Tc00.1047053511217.20  | <i>T. cruzi</i> | 41  | 591  | 631  |
| Tc00.1047053511217.200 | <i>T. cruzi</i> | 50  | 31   | 80   |
| Tc00.1047053511217.209 | <i>T. cruzi</i> | 140 | 146  | 285  |
| Tc00.1047053511217.30  | <i>T. cruzi</i> | 75  | 12   | 86   |
| Tc00.1047053511217.30  | <i>T. cruzi</i> | 49  | 327  | 375  |
| Tc00.1047053511217.30  | <i>T. cruzi</i> | 49  | 327  | 375  |
| Tc00.1047053511217.50  | <i>T. cruzi</i> | 71  | 1    | 71   |
| Tc00.1047053511217.50  | <i>T. cruzi</i> | 134 | 113  | 246  |
| Tc00.1047053511217.50  | <i>T. cruzi</i> | 64  | 320  | 383  |
| Tc00.1047053511217.50  | <i>T. cruzi</i> | 56  | 428  | 483  |
| Tc00.1047053511217.50  | <i>T. cruzi</i> | 52  | 606  | 657  |
| Tc00.1047053511217.50  | <i>T. cruzi</i> | 59  | 772  | 830  |
| Tc00.1047053511217.50  | <i>T. cruzi</i> | 169 | 837  | 1005 |
| Tc00.1047053511217.50  | <i>T. cruzi</i> | 50  | 1128 | 1177 |
| Tc00.1047053511217.50  | <i>T. cruzi</i> | 75  | 1227 | 1301 |
| Tc00.1047053511217.60  | <i>T. cruzi</i> | 49  | 388  | 436  |
| Tc00.1047053511217.70  | <i>T. cruzi</i> | 105 | 8    | 112  |
| Tc00.1047053511217.70  | <i>T. cruzi</i> | 45  | 615  | 659  |
| Tc00.1047053511217.70  | <i>T. cruzi</i> | 42  | 909  | 950  |
| Tc00.1047053511217.90  | <i>T. cruzi</i> | 51  | 585  | 635  |
| Tc00.1047053511217.90  | <i>T. cruzi</i> | 55  | 1358 | 1412 |
| Tc00.1047053511217.90  | <i>T. cruzi</i> | 158 | 1670 | 1827 |
| Tc00.1047053511253.20  | <i>T. cruzi</i> | 160 | 383  | 542  |
| Tc00.1047053511253.20  | <i>T. cruzi</i> | 104 | 568  | 671  |
| Tc00.1047053511253.20  | <i>T. cruzi</i> | 104 | 568  | 671  |
| Tc00.1047053511253.31  | <i>T. cruzi</i> | 59  | 1    | 59   |
| Tc00.1047053511253.31  | <i>T. cruzi</i> | 148 | 395  | 542  |
| Tc00.1047053511253.31  | <i>T. cruzi</i> | 47  | 601  | 647  |
| Tc00.1047053511253.31  | <i>T. cruzi</i> | 595 | 803  | 1397 |
| Tc00.1047053511303.100 | <i>T. cruzi</i> | 273 | 69   | 341  |
| Tc00.1047053511303.110 | <i>T. cruzi</i> | 63  | 655  | 717  |
| Tc00.1047053511303.120 | <i>T. cruzi</i> | 46  | 1    | 46   |
| Tc00.1047053511303.120 | <i>T. cruzi</i> | 60  | 238  | 297  |

|                        |                 |     |      |      |
|------------------------|-----------------|-----|------|------|
| Tc00.1047053511303.120 | <i>T. cruzi</i> | 93  | 446  | 538  |
| Tc00.1047053511303.120 | <i>T. cruzi</i> | 93  | 727  | 819  |
| Tc00.1047053511303.130 | <i>T. cruzi</i> | 50  | 26   | 75   |
| Tc00.1047053511303.130 | <i>T. cruzi</i> | 172 | 277  | 448  |
| Tc00.1047053511303.130 | <i>T. cruzi</i> | 88  | 496  | 583  |
| Tc00.1047053511303.130 | <i>T. cruzi</i> | 94  | 813  | 906  |
| Tc00.1047053511303.140 | <i>T. cruzi</i> | 97  | 1    | 97   |
| Tc00.1047053511303.140 | <i>T. cruzi</i> | 490 | 221  | 710  |
| Tc00.1047053511303.160 | <i>T. cruzi</i> | 58  | 1    | 58   |
| Tc00.1047053511303.160 | <i>T. cruzi</i> | 54  | 623  | 676  |
| Tc00.1047053511303.20  | <i>T. cruzi</i> | 76  | 144  | 219  |
| Tc00.1047053511303.20  | <i>T. cruzi</i> | 96  | 314  | 409  |
| Tc00.1047053511303.20  | <i>T. cruzi</i> | 96  | 314  | 409  |
| Tc00.1047053511303.24  | <i>T. cruzi</i> | 146 | 1    | 146  |
| Tc00.1047053511303.24  | <i>T. cruzi</i> | 77  | 174  | 250  |
| Tc00.1047053511303.30  | <i>T. cruzi</i> | 71  | 146  | 216  |
| Tc00.1047053511303.34  | <i>T. cruzi</i> | 65  | 1    | 65   |
| Tc00.1047053511303.40  | <i>T. cruzi</i> | 43  | 538  | 580  |
| Tc00.1047053511303.50  | <i>T. cruzi</i> | 84  | 33   | 116  |
| Tc00.1047053511303.60  | <i>T. cruzi</i> | 107 | 590  | 696  |
| Tc00.1047053511303.80  | <i>T. cruzi</i> | 59  | 233  | 291  |
| Tc00.1047053511303.9   | <i>T. cruzi</i> | 291 | 1    | 291  |
| Tc00.1047053511303.90  | <i>T. cruzi</i> | 51  | 952  | 1002 |
| Tc00.1047053511305.10  | <i>T. cruzi</i> | 45  | 89   | 133  |
| Tc00.1047053511305.10  | <i>T. cruzi</i> | 74  | 307  | 380  |
| Tc00.1047053511305.20  | <i>T. cruzi</i> | 933 | 99   | 1031 |
| Tc00.1047053511305.20  | <i>T. cruzi</i> | 56  | 1098 | 1153 |
| Tc00.1047053511307.10  | <i>T. cruzi</i> | 69  | 353  | 421  |
| Tc00.1047053511307.10  | <i>T. cruzi</i> | 168 | 1126 | 1293 |
| Tc00.1047053511307.20  | <i>T. cruzi</i> | 202 | 1    | 202  |
| Tc00.1047053511307.20  | <i>T. cruzi</i> | 143 | 306  | 448  |
| Tc00.1047053511307.20  | <i>T. cruzi</i> | 65  | 585  | 649  |
| Tc00.1047053511307.20  | <i>T. cruzi</i> | 70  | 847  | 916  |
| Tc00.1047053511307.6   | <i>T. cruzi</i> | 116 | 66   | 181  |
| Tc00.1047053511307.6   | <i>T. cruzi</i> | 83  | 862  | 944  |
| Tc00.1047053511309.14  | <i>T. cruzi</i> | 71  | 1    | 71   |
| Tc00.1047053511309.20  | <i>T. cruzi</i> | 42  | 332  | 373  |
| Tc00.1047053511309.30  | <i>T. cruzi</i> | 41  | 201  | 241  |
| Tc00.1047053511309.60  | <i>T. cruzi</i> | 115 | 1    | 115  |
| Tc00.1047053511309.60  | <i>T. cruzi</i> | 281 | 137  | 417  |
| Tc00.1047053511309.60  | <i>T. cruzi</i> | 51  | 695  | 745  |
| Tc00.1047053511309.7   | <i>T. cruzi</i> | 141 | 26   | 166  |
| Tc00.1047053511309.7   | <i>T. cruzi</i> | 46  | 266  | 311  |
| Tc00.1047053511311.20  | <i>T. cruzi</i> | 42  | 1    | 42   |
| Tc00.1047053511311.20  | <i>T. cruzi</i> | 45  | 230  | 274  |
| Tc00.1047053511311.20  | <i>T. cruzi</i> | 45  | 230  | 274  |
| Tc00.1047053511311.30  | <i>T. cruzi</i> | 71  | 533  | 603  |

|                        |                 |     |      |      |
|------------------------|-----------------|-----|------|------|
| Tc00.1047053511311.60  | <i>T. cruzi</i> | 54  | 1    | 54   |
| Tc00.1047053511311.60  | <i>T. cruzi</i> | 78  | 228  | 305  |
| Tc00.1047053511311.7   | <i>T. cruzi</i> | 46  | 1    | 46   |
| Tc00.1047053511311.7   | <i>T. cruzi</i> | 71  | 586  | 656  |
| Tc00.1047053511311.7   | <i>T. cruzi</i> | 71  | 586  | 656  |
| Tc00.1047053511311.70  | <i>T. cruzi</i> | 212 | 1    | 212  |
| Tc00.1047053511311.70  | <i>T. cruzi</i> | 65  | 490  | 554  |
| Tc00.1047053511311.70  | <i>T. cruzi</i> | 257 | 683  | 939  |
| Tc00.1047053511311.70  | <i>T. cruzi</i> | 41  | 1172 | 1212 |
| Tc00.1047053511311.70  | <i>T. cruzi</i> | 90  | 1311 | 1400 |
| Tc00.1047053511311.70  | <i>T. cruzi</i> | 70  | 2018 | 2087 |
| Tc00.1047053511311.70  | <i>T. cruzi</i> | 60  | 2183 | 2242 |
| Tc00.1047053511311.70  | <i>T. cruzi</i> | 189 | 2248 | 2436 |
| Tc00.1047053511311.70  | <i>T. cruzi</i> | 56  | 2940 | 2995 |
| Tc00.1047053511311.70  | <i>T. cruzi</i> | 137 | 3469 | 3605 |
| Tc00.1047053511311.70  | <i>T. cruzi</i> | 65  | 3652 | 3716 |
| Tc00.1047053511311.70  | <i>T. cruzi</i> | 77  | 3747 | 3823 |
| Tc00.1047053511311.70  | <i>T. cruzi</i> | 98  | 3903 | 4000 |
| Tc00.1047053511311.70  | <i>T. cruzi</i> | 89  | 4025 | 4113 |
| Tc00.1047053511311.70  | <i>T. cruzi</i> | 81  | 4379 | 4459 |
| Tc00.1047053511313.10  | <i>T. cruzi</i> | 69  | 105  | 173  |
| Tc00.1047053511313.10  | <i>T. cruzi</i> | 51  | 196  | 246  |
| Tc00.1047053511313.10  | <i>T. cruzi</i> | 42  | 254  | 295  |
| Tc00.1047053511313.10  | <i>T. cruzi</i> | 46  | 610  | 655  |
| Tc00.1047053511313.20  | <i>T. cruzi</i> | 47  | 63   | 109  |
| Tc00.1047053511313.20  | <i>T. cruzi</i> | 64  | 553  | 616  |
| Tc00.1047053511313.30  | <i>T. cruzi</i> | 116 | 1    | 116  |
| Tc00.1047053511313.30  | <i>T. cruzi</i> | 54  | 135  | 188  |
| Tc00.1047053511313.30  | <i>T. cruzi</i> | 422 | 307  | 728  |
| Tc00.1047053511313.30  | <i>T. cruzi</i> | 137 | 1042 | 1178 |
| Tc00.1047053511315.30  | <i>T. cruzi</i> | 43  | 428  | 470  |
| Tc00.1047053511315.9   | <i>T. cruzi</i> | 101 | 102  | 202  |
| Tc00.1047053511325.25  | <i>T. cruzi</i> | 44  | 21   | 64   |
| Tc00.1047053511325.40  | <i>T. cruzi</i> | 44  | 21   | 64   |
| Tc00.1047053511327.20  | <i>T. cruzi</i> | 47  | 1    | 47   |
| Tc00.1047053511327.20  | <i>T. cruzi</i> | 150 | 94   | 243  |
| Tc00.1047053511331.10  | <i>T. cruzi</i> | 221 | 1    | 221  |
| Tc00.1047053511333.4   | <i>T. cruzi</i> | 68  | 1    | 68   |
| Tc00.1047053511333.4   | <i>T. cruzi</i> | 42  | 572  | 613  |
| Tc00.1047053511337.4   | <i>T. cruzi</i> | 83  | 1    | 83   |
| Tc00.1047053511337.4   | <i>T. cruzi</i> | 46  | 126  | 171  |
| Tc00.1047053511337.4   | <i>T. cruzi</i> | 164 | 227  | 390  |
| Tc00.1047053511349.100 | <i>T. cruzi</i> | 46  | 1    | 46   |
| Tc00.1047053511349.100 | <i>T. cruzi</i> | 64  | 66   | 129  |
| Tc00.1047053511349.100 | <i>T. cruzi</i> | 165 | 661  | 825  |
| Tc00.1047053511349.40  | <i>T. cruzi</i> | 60  | 303  | 362  |
| Tc00.1047053511353.10  | <i>T. cruzi</i> | 47  | 23   | 69   |

|                       |                 |     |     |     |
|-----------------------|-----------------|-----|-----|-----|
| Tc00.1047053511353.10 | <i>T. cruzi</i> | 46  | 309 | 354 |
| Tc00.1047053511353.10 | <i>T. cruzi</i> | 46  | 309 | 354 |
| Tc00.1047053511353.20 | <i>T. cruzi</i> | 102 | 87  | 188 |
| Tc00.1047053511353.20 | <i>T. cruzi</i> | 45  | 203 | 247 |
| Tc00.1047053511353.20 | <i>T. cruzi</i> | 125 | 284 | 408 |
| Tc00.1047053511353.20 | <i>T. cruzi</i> | 42  | 790 | 831 |
| Tc00.1047053511355.14 | <i>T. cruzi</i> | 43  | 160 | 202 |
| Tc00.1047053511355.20 | <i>T. cruzi</i> | 109 | 102 | 210 |
| Tc00.1047053511355.20 | <i>T. cruzi</i> | 47  | 285 | 331 |
| Tc00.1047053511355.20 | <i>T. cruzi</i> | 47  | 285 | 331 |
| Tc00.1047053511355.50 | <i>T. cruzi</i> | 52  | 1   | 52  |
| Tc00.1047053511355.7  | <i>T. cruzi</i> | 67  | 1   | 67  |
| Tc00.1047053511357.5  | <i>T. cruzi</i> | 52  | 1   | 52  |
| Tc00.1047053511361.20 | <i>T. cruzi</i> | 66  | 31  | 96  |
| Tc00.1047053511361.20 | <i>T. cruzi</i> | 56  | 221 | 276 |
| Tc00.1047053511361.20 | <i>T. cruzi</i> | 56  | 221 | 276 |
| Tc00.1047053511361.30 | <i>T. cruzi</i> | 65  | 20  | 84  |
| Tc00.1047053511361.4  | <i>T. cruzi</i> | 40  | 35  | 74  |
| Tc00.1047053511361.60 | <i>T. cruzi</i> | 54  | 163 | 216 |
| Tc00.1047053511361.60 | <i>T. cruzi</i> | 67  | 244 | 310 |
| Tc00.1047053511361.60 | <i>T. cruzi</i> | 51  | 573 | 623 |
| Tc00.1047053511361.60 | <i>T. cruzi</i> | 98  | 745 | 842 |
| Tc00.1047053511361.70 | <i>T. cruzi</i> | 101 | 1   | 101 |
| Tc00.1047053511361.70 | <i>T. cruzi</i> | 274 | 130 | 403 |
| Tc00.1047053511361.70 | <i>T. cruzi</i> | 110 | 580 | 689 |
| Tc00.1047053511361.70 | <i>T. cruzi</i> | 62  | 731 | 792 |
| Tc00.1047053511361.80 | <i>T. cruzi</i> | 41  | 1   | 41  |
| Tc00.1047053511361.80 | <i>T. cruzi</i> | 101 | 124 | 224 |
| Tc00.1047053511361.80 | <i>T. cruzi</i> | 209 | 266 | 474 |
| Tc00.1047053511363.10 | <i>T. cruzi</i> | 44  | 1   | 44  |
| Tc00.1047053511363.10 | <i>T. cruzi</i> | 109 | 77  | 185 |
| Tc00.1047053511363.10 | <i>T. cruzi</i> | 525 | 217 | 741 |
| Tc00.1047053511363.4  | <i>T. cruzi</i> | 78  | 173 | 250 |
| Tc00.1047053511365.10 | <i>T. cruzi</i> | 46  | 193 | 238 |
| Tc00.1047053511365.4  | <i>T. cruzi</i> | 89  | 85  | 173 |
| Tc00.1047053511365.90 | <i>T. cruzi</i> | 408 | 1   | 408 |
| Tc00.1047053511365.90 | <i>T. cruzi</i> | 47  | 493 | 539 |
| Tc00.1047053511365.90 | <i>T. cruzi</i> | 299 | 559 | 857 |
| Tc00.1047053511393.20 | <i>T. cruzi</i> | 50  | 301 | 350 |
| Tc00.1047053511393.30 | <i>T. cruzi</i> | 179 | 359 | 537 |
| Tc00.1047053511393.30 | <i>T. cruzi</i> | 41  | 639 | 679 |
| Tc00.1047053511393.60 | <i>T. cruzi</i> | 163 | 1   | 163 |
| Tc00.1047053511393.60 | <i>T. cruzi</i> | 79  | 274 | 352 |
| Tc00.1047053511393.60 | <i>T. cruzi</i> | 68  | 556 | 623 |
| Tc00.1047053511393.79 | <i>T. cruzi</i> | 85  | 1   | 85  |
| Tc00.1047053511395.20 | <i>T. cruzi</i> | 47  | 279 | 325 |
| Tc00.1047053511395.40 | <i>T. cruzi</i> | 74  | 145 | 218 |



|                        |                 |     |     |     |
|------------------------|-----------------|-----|-----|-----|
| Tc00.1047053511395.40  | <i>T. cruzi</i> | 193 | 235 | 427 |
| Tc00.1047053511395.40  | <i>T. cruzi</i> | 55  | 479 | 533 |
| Tc00.1047053511395.50  | <i>T. cruzi</i> | 66  | 83  | 148 |
| Tc00.1047053511395.50  | <i>T. cruzi</i> | 47  | 196 | 242 |
| Tc00.1047053511395.50  | <i>T. cruzi</i> | 174 | 327 | 500 |
| Tc00.1047053511395.60  | <i>T. cruzi</i> | 245 | 316 | 560 |
| Tc00.1047053511395.70  | <i>T. cruzi</i> | 125 | 97  | 221 |
| Tc00.1047053511395.80  | <i>T. cruzi</i> | 41  | 62  | 102 |
| Tc00.1047053511395.80  | <i>T. cruzi</i> | 82  | 136 | 217 |
| Tc00.1047053511395.80  | <i>T. cruzi</i> | 123 | 442 | 564 |
| Tc00.1047053511395.90  | <i>T. cruzi</i> | 74  | 247 | 320 |
| Tc00.1047053511395.90  | <i>T. cruzi</i> | 203 | 342 | 544 |
| Tc00.1047053511399.24  | <i>T. cruzi</i> | 52  | 1   | 52  |
| Tc00.1047053511399.24  | <i>T. cruzi</i> | 56  | 117 | 172 |
| Tc00.1047053511399.24  | <i>T. cruzi</i> | 47  | 208 | 254 |
| Tc00.1047053511399.24  | <i>T. cruzi</i> | 45  | 410 | 454 |
| Tc00.1047053511399.24  | <i>T. cruzi</i> | 168 | 713 | 880 |
| Tc00.1047053511399.50  | <i>T. cruzi</i> | 382 | 72  | 453 |
| Tc00.1047053511401.100 | <i>T. cruzi</i> | 372 | 41  | 412 |
| Tc00.1047053511401.120 | <i>T. cruzi</i> | 44  | 1   | 44  |
| Tc00.1047053511401.120 | <i>T. cruzi</i> | 45  | 119 | 163 |
| Tc00.1047053511401.120 | <i>T. cruzi</i> | 47  | 201 | 247 |
| Tc00.1047053511401.120 | <i>T. cruzi</i> | 40  | 407 | 446 |
| Tc00.1047053511401.120 | <i>T. cruzi</i> | 184 | 713 | 896 |
| Tc00.1047053511401.30  | <i>T. cruzi</i> | 43  | 1   | 43  |
| Tc00.1047053511401.30  | <i>T. cruzi</i> | 42  | 122 | 163 |
| Tc00.1047053511401.30  | <i>T. cruzi</i> | 54  | 283 | 336 |
| Tc00.1047053511401.30  | <i>T. cruzi</i> | 44  | 411 | 454 |
| Tc00.1047053511401.30  | <i>T. cruzi</i> | 184 | 715 | 898 |
| Tc00.1047053511401.90  | <i>T. cruzi</i> | 45  | 1   | 45  |
| Tc00.1047053511401.90  | <i>T. cruzi</i> | 46  | 121 | 166 |
| Tc00.1047053511401.90  | <i>T. cruzi</i> | 48  | 207 | 254 |
| Tc00.1047053511401.90  | <i>T. cruzi</i> | 54  | 412 | 465 |
| Tc00.1047053511401.90  | <i>T. cruzi</i> | 191 | 715 | 905 |
| Tc00.1047053511407.20  | <i>T. cruzi</i> | 57  | 64  | 120 |
| Tc00.1047053511407.30  | <i>T. cruzi</i> | 73  | 86  | 158 |
| Tc00.1047053511407.30  | <i>T. cruzi</i> | 62  | 183 | 244 |
| Tc00.1047053511407.30  | <i>T. cruzi</i> | 194 | 381 | 574 |
| Tc00.1047053511407.30  | <i>T. cruzi</i> | 75  | 612 | 686 |
| Tc00.1047053511407.30  | <i>T. cruzi</i> | 40  | 845 | 884 |
| Tc00.1047053511407.40  | <i>T. cruzi</i> | 232 | 1   | 232 |
| Tc00.1047053511407.40  | <i>T. cruzi</i> | 75  | 257 | 331 |
| Tc00.1047053511407.40  | <i>T. cruzi</i> | 220 | 370 | 589 |
| Tc00.1047053511407.40  | <i>T. cruzi</i> | 106 | 638 | 743 |
| Tc00.1047053511407.50  | <i>T. cruzi</i> | 79  | 58  | 136 |
| Tc00.1047053511407.50  | <i>T. cruzi</i> | 61  | 199 | 259 |
| Tc00.1047053511407.50  | <i>T. cruzi</i> | 50  | 435 | 484 |

|                       |                 |     |      |      |
|-----------------------|-----------------|-----|------|------|
| Tc00.1047053511407.50 | <i>T. cruzi</i> | 318 | 505  | 822  |
| Tc00.1047053511407.50 | <i>T. cruzi</i> | 90  | 966  | 1055 |
| Tc00.1047053511407.50 | <i>T. cruzi</i> | 68  | 1182 | 1249 |
| Tc00.1047053511407.50 | <i>T. cruzi</i> | 69  | 1324 | 1392 |
| Tc00.1047053511409.10 | <i>T. cruzi</i> | 145 | 160  | 304  |
| Tc00.1047053511409.10 | <i>T. cruzi</i> | 208 | 344  | 551  |
| Tc00.1047053511409.30 | <i>T. cruzi</i> | 133 | 55   | 187  |
| Tc00.1047053511409.30 | <i>T. cruzi</i> | 107 | 209  | 315  |
| Tc00.1047053511409.30 | <i>T. cruzi</i> | 43  | 612  | 654  |
| Tc00.1047053511409.40 | <i>T. cruzi</i> | 44  | 181  | 224  |
| Tc00.1047053511409.50 | <i>T. cruzi</i> | 385 | 113  | 497  |
| Tc00.1047053511409.60 | <i>T. cruzi</i> | 84  | 97   | 180  |
| Tc00.1047053511409.70 | <i>T. cruzi</i> | 135 | 180  | 314  |
| Tc00.1047053511411.16 | <i>T. cruzi</i> | 41  | 93   | 133  |
| Tc00.1047053511411.8  | <i>T. cruzi</i> | 69  | 1    | 69   |
| Tc00.1047053511411.8  | <i>T. cruzi</i> | 93  | 96   | 188  |
| Tc00.1047053511411.8  | <i>T. cruzi</i> | 204 | 287  | 490  |
| Tc00.1047053511413.19 | <i>T. cruzi</i> | 46  | 1    | 46   |
| Tc00.1047053511413.19 | <i>T. cruzi</i> | 69  | 66   | 134  |
| Tc00.1047053511413.19 | <i>T. cruzi</i> | 69  | 66   | 134  |
| Tc00.1047053511415.40 | <i>T. cruzi</i> | 41  | 225  | 265  |
| Tc00.1047053511415.40 | <i>T. cruzi</i> | 55  | 1596 | 1650 |
| Tc00.1047053511415.40 | <i>T. cruzi</i> | 58  | 2843 | 2900 |
| Tc00.1047053511415.40 | <i>T. cruzi</i> | 83  | 3380 | 3462 |
| Tc00.1047053511417.40 | <i>T. cruzi</i> | 40  | 1014 | 1053 |
| Tc00.1047053511417.60 | <i>T. cruzi</i> | 94  | 350  | 443  |
| Tc00.1047053511417.70 | <i>T. cruzi</i> | 40  | 1    | 40   |
| Tc00.1047053511417.80 | <i>T. cruzi</i> | 83  | 255  | 337  |
| Tc00.1047053511417.90 | <i>T. cruzi</i> | 83  | 255  | 337  |
| Tc00.1047053511417.94 | <i>T. cruzi</i> | 77  | 27   | 103  |
| Tc00.1047053511417.94 | <i>T. cruzi</i> | 67  | 113  | 179  |
| Tc00.1047053511417.94 | <i>T. cruzi</i> | 67  | 113  | 179  |
| Tc00.1047053511419.10 | <i>T. cruzi</i> | 80  | 1    | 80   |
| Tc00.1047053511419.10 | <i>T. cruzi</i> | 101 | 108  | 208  |
| Tc00.1047053511419.10 | <i>T. cruzi</i> | 101 | 108  | 208  |
| Tc00.1047053511419.20 | <i>T. cruzi</i> | 67  | 1    | 67   |
| Tc00.1047053511419.20 | <i>T. cruzi</i> | 112 | 272  | 383  |
| Tc00.1047053511419.20 | <i>T. cruzi</i> | 58  | 463  | 520  |
| Tc00.1047053511419.30 | <i>T. cruzi</i> | 92  | 51   | 142  |
| Tc00.1047053511419.30 | <i>T. cruzi</i> | 49  | 173  | 221  |
| Tc00.1047053511419.30 | <i>T. cruzi</i> | 49  | 173  | 221  |
| Tc00.1047053511419.4  | <i>T. cruzi</i> | 43  | 1    | 43   |
| Tc00.1047053511419.40 | <i>T. cruzi</i> | 50  | 370  | 419  |
| Tc00.1047053511419.50 | <i>T. cruzi</i> | 46  | 105  | 150  |
| Tc00.1047053511419.50 | <i>T. cruzi</i> | 50  | 454  | 503  |
| Tc00.1047053511419.50 | <i>T. cruzi</i> | 50  | 454  | 503  |
| Tc00.1047053511419.70 | <i>T. cruzi</i> | 76  | 396  | 471  |

|                        |                 |     |     |      |
|------------------------|-----------------|-----|-----|------|
| Tc00.1047053511419.80  | <i>T. cruzi</i> | 140 | 296 | 435  |
| Tc00.1047053511421.10  | <i>T. cruzi</i> | 47  | 109 | 155  |
| Tc00.1047053511421.10  | <i>T. cruzi</i> | 41  | 565 | 605  |
| Tc00.1047053511421.10  | <i>T. cruzi</i> | 41  | 991 | 1031 |
| Tc00.1047053511421.100 | <i>T. cruzi</i> | 141 | 78  | 218  |
| Tc00.1047053511421.100 | <i>T. cruzi</i> | 87  | 240 | 326  |
| Tc00.1047053511421.150 | <i>T. cruzi</i> | 90  | 1   | 90   |
| Tc00.1047053511421.160 | <i>T. cruzi</i> | 63  | 361 | 423  |
| Tc00.1047053511421.170 | <i>T. cruzi</i> | 49  | 30  | 78   |
| Tc00.1047053511421.170 | <i>T. cruzi</i> | 81  | 109 | 189  |
| Tc00.1047053511421.180 | <i>T. cruzi</i> | 52  | 131 | 182  |
| Tc00.1047053511421.180 | <i>T. cruzi</i> | 46  | 299 | 344  |
| Tc00.1047053511421.180 | <i>T. cruzi</i> | 46  | 299 | 344  |
| Tc00.1047053511421.185 | <i>T. cruzi</i> | 154 | 31  | 184  |
| Tc00.1047053511421.190 | <i>T. cruzi</i> | 59  | 1   | 59   |
| Tc00.1047053511421.190 | <i>T. cruzi</i> | 61  | 73  | 133  |
| Tc00.1047053511421.190 | <i>T. cruzi</i> | 61  | 73  | 133  |
| Tc00.1047053511421.210 | <i>T. cruzi</i> | 50  | 202 | 251  |
| Tc00.1047053511421.210 | <i>T. cruzi</i> | 69  | 480 | 548  |
| Tc00.1047053511421.40  | <i>T. cruzi</i> | 93  | 16  | 108  |
| Tc00.1047053511421.50  | <i>T. cruzi</i> | 67  | 184 | 250  |
| Tc00.1047053511421.90  | <i>T. cruzi</i> | 49  | 218 | 266  |
| Tc00.1047053511423.100 | <i>T. cruzi</i> | 58  | 114 | 171  |
| Tc00.1047053511423.140 | <i>T. cruzi</i> | 416 | 141 | 556  |
| Tc00.1047053511423.170 | <i>T. cruzi</i> | 44  | 45  | 88   |
| Tc00.1047053511423.170 | <i>T. cruzi</i> | 72  | 124 | 195  |
| Tc00.1047053511423.170 | <i>T. cruzi</i> | 92  | 227 | 318  |
| Tc00.1047053511423.170 | <i>T. cruzi</i> | 47  | 441 | 487  |
| Tc00.1047053511423.50  | <i>T. cruzi</i> | 884 | 1   | 884  |
| Tc00.1047053511423.60  | <i>T. cruzi</i> | 131 | 1   | 131  |
| Tc00.1047053511425.40  | <i>T. cruzi</i> | 50  | 41  | 90   |
| Tc00.1047053511425.40  | <i>T. cruzi</i> | 88  | 121 | 208  |
| Tc00.1047053511425.40  | <i>T. cruzi</i> | 231 | 427 | 657  |
| Tc00.1047053511427.19  | <i>T. cruzi</i> | 41  | 40  | 80   |
| Tc00.1047053511427.19  | <i>T. cruzi</i> | 75  | 375 | 449  |
| Tc00.1047053511429.20  | <i>T. cruzi</i> | 54  | 92  | 145  |
| Tc00.1047053511429.20  | <i>T. cruzi</i> | 92  | 244 | 335  |
| Tc00.1047053511429.20  | <i>T. cruzi</i> | 57  | 366 | 422  |
| Tc00.1047053511429.30  | <i>T. cruzi</i> | 55  | 112 | 166  |
| Tc00.1047053511429.30  | <i>T. cruzi</i> | 258 | 403 | 660  |
| Tc00.1047053511431.20  | <i>T. cruzi</i> | 136 | 1   | 136  |
| Tc00.1047053511431.20  | <i>T. cruzi</i> | 726 | 173 | 898  |
| Tc00.1047053511431.30  | <i>T. cruzi</i> | 362 | 143 | 504  |
| Tc00.1047053511431.50  | <i>T. cruzi</i> | 353 | 29  | 381  |
| Tc00.1047053511431.54  | <i>T. cruzi</i> | 210 | 47  | 256  |
| Tc00.1047053511431.60  | <i>T. cruzi</i> | 55  | 66  | 120  |
| Tc00.1047053511431.60  | <i>T. cruzi</i> | 68  | 212 | 279  |

|                        |                 |     |      |      |
|------------------------|-----------------|-----|------|------|
| Tc00.1047053511431.60  | <i>T. cruzi</i> | 68  | 212  | 279  |
| Tc00.1047053511431.90  | <i>T. cruzi</i> | 413 | 33   | 445  |
| Tc00.1047053511433.10  | <i>T. cruzi</i> | 158 | 144  | 301  |
| Tc00.1047053511433.10  | <i>T. cruzi</i> | 314 | 370  | 683  |
| Tc00.1047053511435.20  | <i>T. cruzi</i> | 263 | 1    | 263  |
| Tc00.1047053511435.20  | <i>T. cruzi</i> | 100 | 380  | 479  |
| Tc00.1047053511435.20  | <i>T. cruzi</i> | 62  | 536  | 597  |
| Tc00.1047053511435.20  | <i>T. cruzi</i> | 82  | 650  | 731  |
| Tc00.1047053511435.20  | <i>T. cruzi</i> | 40  | 808  | 847  |
| Tc00.1047053511435.30  | <i>T. cruzi</i> | 108 | 451  | 558  |
| Tc00.1047053511435.30  | <i>T. cruzi</i> | 42  | 1020 | 1061 |
| Tc00.1047053511435.30  | <i>T. cruzi</i> | 58  | 1070 | 1127 |
| Tc00.1047053511435.40  | <i>T. cruzi</i> | 575 | 1    | 575  |
| Tc00.1047053511435.49  | <i>T. cruzi</i> | 95  | 1    | 95   |
| Tc00.1047053511439.120 | <i>T. cruzi</i> | 67  | 110  | 176  |
| Tc00.1047053511439.30  | <i>T. cruzi</i> | 53  | 1    | 53   |
| Tc00.1047053511439.40  | <i>T. cruzi</i> | 74  | 298  | 371  |
| Tc00.1047053511439.50  | <i>T. cruzi</i> | 74  | 220  | 293  |
| Tc00.1047053511439.60  | <i>T. cruzi</i> | 48  | 209  | 256  |
| Tc00.1047053511439.70  | <i>T. cruzi</i> | 52  | 46   | 97   |
| Tc00.1047053511439.70  | <i>T. cruzi</i> | 114 | 110  | 223  |
| Tc00.1047053511439.70  | <i>T. cruzi</i> | 139 | 272  | 410  |
| Tc00.1047053511439.80  | <i>T. cruzi</i> | 62  | 199  | 260  |
| Tc00.1047053511439.80  | <i>T. cruzi</i> | 117 | 385  | 501  |
| Tc00.1047053511439.80  | <i>T. cruzi</i> | 51  | 1222 | 1272 |
| Tc00.1047053511439.90  | <i>T. cruzi</i> | 75  | 100  | 174  |
| Tc00.1047053511445.100 | <i>T. cruzi</i> | 97  | 42   | 138  |
| Tc00.1047053511445.100 | <i>T. cruzi</i> | 69  | 140  | 208  |
| Tc00.1047053511445.100 | <i>T. cruzi</i> | 158 | 266  | 423  |
| Tc00.1047053511445.100 | <i>T. cruzi</i> | 266 | 462  | 727  |
| Tc00.1047053511445.110 | <i>T. cruzi</i> | 318 | 64   | 381  |
| Tc00.1047053511445.130 | <i>T. cruzi</i> | 42  | 535  | 576  |
| Tc00.1047053511445.140 | <i>T. cruzi</i> | 62  | 67   | 128  |
| Tc00.1047053511445.140 | <i>T. cruzi</i> | 49  | 224  | 272  |
| Tc00.1047053511445.140 | <i>T. cruzi</i> | 49  | 224  | 272  |
| Tc00.1047053511445.20  | <i>T. cruzi</i> | 165 | 1    | 165  |
| Tc00.1047053511445.20  | <i>T. cruzi</i> | 73  | 193  | 265  |
| Tc00.1047053511445.40  | <i>T. cruzi</i> | 57  | 72   | 128  |
| Tc00.1047053511445.70  | <i>T. cruzi</i> | 60  | 235  | 294  |
| Tc00.1047053511445.70  | <i>T. cruzi</i> | 137 | 305  | 441  |
| Tc00.1047053511445.70  | <i>T. cruzi</i> | 69  | 480  | 548  |
| Tc00.1047053511445.90  | <i>T. cruzi</i> | 48  | 37   | 84   |
| Tc00.1047053511445.90  | <i>T. cruzi</i> | 45  | 513  | 557  |
| Tc00.1047053511445.90  | <i>T. cruzi</i> | 45  | 513  | 557  |
| Tc00.1047053511467.10  | <i>T. cruzi</i> | 108 | 158  | 265  |
| Tc00.1047053511467.16  | <i>T. cruzi</i> | 153 | 30   | 182  |
| Tc00.1047053511467.16  | <i>T. cruzi</i> | 67  | 189  | 255  |

|                        |                 |     |      |      |
|------------------------|-----------------|-----|------|------|
| Tc00.1047053511467.16  | <i>T. cruzi</i> | 45  | 294  | 338  |
| Tc00.1047053511467.20  | <i>T. cruzi</i> | 346 | 132  | 477  |
| Tc00.1047053511467.20  | <i>T. cruzi</i> | 67  | 536  | 602  |
| Tc00.1047053511467.20  | <i>T. cruzi</i> | 49  | 639  | 687  |
| Tc00.1047053511467.20  | <i>T. cruzi</i> | 50  | 731  | 780  |
| Tc00.1047053511467.20  | <i>T. cruzi</i> | 128 | 802  | 929  |
| Tc00.1047053511467.20  | <i>T. cruzi</i> | 99  | 984  | 1082 |
| Tc00.1047053511467.20  | <i>T. cruzi</i> | 64  | 1090 | 1153 |
| Tc00.1047053511467.20  | <i>T. cruzi</i> | 45  | 1190 | 1234 |
| Tc00.1047053511467.20  | <i>T. cruzi</i> | 65  | 1332 | 1396 |
| Tc00.1047053511467.20  | <i>T. cruzi</i> | 143 | 1457 | 1599 |
| Tc00.1047053511467.20  | <i>T. cruzi</i> | 100 | 1646 | 1745 |
| Tc00.1047053511467.20  | <i>T. cruzi</i> | 549 | 1760 | 2308 |
| Tc00.1047053511467.20  | <i>T. cruzi</i> | 190 | 2334 | 2523 |
| Tc00.1047053511467.30  | <i>T. cruzi</i> | 48  | 1    | 48   |
| Tc00.1047053511467.4   | <i>T. cruzi</i> | 116 | 96   | 211  |
| Tc00.1047053511467.50  | <i>T. cruzi</i> | 54  | 1    | 54   |
| Tc00.1047053511467.50  | <i>T. cruzi</i> | 41  | 85   | 125  |
| Tc00.1047053511467.50  | <i>T. cruzi</i> | 53  | 251  | 303  |
| Tc00.1047053511467.50  | <i>T. cruzi</i> | 75  | 311  | 385  |
| Tc00.1047053511467.50  | <i>T. cruzi</i> | 163 | 471  | 633  |
| Tc00.1047053511467.50  | <i>T. cruzi</i> | 163 | 638  | 800  |
| Tc00.1047053511467.60  | <i>T. cruzi</i> | 173 | 23   | 195  |
| Tc00.1047053511467.60  | <i>T. cruzi</i> | 45  | 243  | 287  |
| Tc00.1047053511467.60  | <i>T. cruzi</i> | 45  | 243  | 287  |
| Tc00.1047053511469.105 | <i>T. cruzi</i> | 49  | 35   | 83   |
| Tc00.1047053511469.110 | <i>T. cruzi</i> | 40  | 188  | 227  |
| Tc00.1047053511469.110 | <i>T. cruzi</i> | 55  | 1556 | 1610 |
| Tc00.1047053511469.110 | <i>T. cruzi</i> | 98  | 2768 | 2865 |
| Tc00.1047053511469.50  | <i>T. cruzi</i> | 264 | 1    | 264  |
| Tc00.1047053511469.60  | <i>T. cruzi</i> | 44  | 1    | 44   |
| Tc00.1047053511469.70  | <i>T. cruzi</i> | 40  | 203  | 242  |
| Tc00.1047053511469.80  | <i>T. cruzi</i> | 455 | 179  | 633  |
| Tc00.1047053511469.90  | <i>T. cruzi</i> | 78  | 1    | 78   |
| Tc00.1047053511469.90  | <i>T. cruzi</i> | 182 | 110  | 291  |
| Tc00.1047053511525.20  | <i>T. cruzi</i> | 45  | 179  | 223  |
| Tc00.1047053511527.20  | <i>T. cruzi</i> | 40  | 630  | 669  |
| Tc00.1047053511527.34  | <i>T. cruzi</i> | 63  | 198  | 260  |
| Tc00.1047053511527.70  | <i>T. cruzi</i> | 43  | 847  | 889  |
| Tc00.1047053511527.9   | <i>T. cruzi</i> | 54  | 984  | 1037 |
| Tc00.1047053511529.100 | <i>T. cruzi</i> | 57  | 1    | 57   |
| Tc00.1047053511529.120 | <i>T. cruzi</i> | 42  | 165  | 206  |
| Tc00.1047053511529.130 | <i>T. cruzi</i> | 52  | 1    | 52   |
| Tc00.1047053511529.140 | <i>T. cruzi</i> | 158 | 86   | 243  |
| Tc00.1047053511529.140 | <i>T. cruzi</i> | 45  | 324  | 368  |
| Tc00.1047053511529.140 | <i>T. cruzi</i> | 56  | 621  | 676  |
| Tc00.1047053511529.140 | <i>T. cruzi</i> | 65  | 684  | 748  |

|                        |                 |     |     |      |
|------------------------|-----------------|-----|-----|------|
| Tc00.1047053511529.150 | <i>T. cruzi</i> | 718 | 1   | 718  |
| Tc00.1047053511529.190 | <i>T. cruzi</i> | 219 | 85  | 303  |
| Tc00.1047053511529.200 | <i>T. cruzi</i> | 55  | 47  | 101  |
| Tc00.1047053511529.220 | <i>T. cruzi</i> | 82  | 1   | 82   |
| Tc00.1047053511529.220 | <i>T. cruzi</i> | 97  | 88  | 184  |
| Tc00.1047053511529.220 | <i>T. cruzi</i> | 97  | 88  | 184  |
| Tc00.1047053511529.240 | <i>T. cruzi</i> | 146 | 1   | 146  |
| Tc00.1047053511529.240 | <i>T. cruzi</i> | 102 | 237 | 338  |
| Tc00.1047053511529.240 | <i>T. cruzi</i> | 87  | 944 | 1030 |
| Tc00.1047053511529.250 | <i>T. cruzi</i> | 53  | 183 | 235  |
| Tc00.1047053511529.250 | <i>T. cruzi</i> | 89  | 244 | 332  |
| Tc00.1047053511529.250 | <i>T. cruzi</i> | 89  | 244 | 332  |
| Tc00.1047053511529.40  | <i>T. cruzi</i> | 40  | 110 | 149  |
| Tc00.1047053511529.40  | <i>T. cruzi</i> | 44  | 295 | 338  |
| Tc00.1047053511529.40  | <i>T. cruzi</i> | 44  | 295 | 338  |
| Tc00.1047053511529.80  | <i>T. cruzi</i> | 43  | 24  | 66   |
| Tc00.1047053511529.80  | <i>T. cruzi</i> | 128 | 68  | 195  |
| Tc00.1047053511531.20  | <i>T. cruzi</i> | 75  | 163 | 237  |
| Tc00.1047053511531.30  | <i>T. cruzi</i> | 42  | 1   | 42   |
| Tc00.1047053511531.30  | <i>T. cruzi</i> | 116 | 206 | 321  |
| Tc00.1047053511531.30  | <i>T. cruzi</i> | 120 | 445 | 564  |
| Tc00.1047053511531.44  | <i>T. cruzi</i> | 88  | 87  | 174  |
| Tc00.1047053511531.9   | <i>T. cruzi</i> | 148 | 57  | 204  |
| Tc00.1047053511533.10  | <i>T. cruzi</i> | 55  | 137 | 191  |
| Tc00.1047053511533.10  | <i>T. cruzi</i> | 63  | 711 | 773  |
| Tc00.1047053511533.10  | <i>T. cruzi</i> | 63  | 711 | 773  |
| Tc00.1047053511535.10  | <i>T. cruzi</i> | 76  | 72  | 147  |
| Tc00.1047053511535.10  | <i>T. cruzi</i> | 132 | 199 | 330  |
| Tc00.1047053511535.10  | <i>T. cruzi</i> | 132 | 199 | 330  |
| Tc00.1047053511535.30  | <i>T. cruzi</i> | 80  | 49  | 128  |
| Tc00.1047053511535.30  | <i>T. cruzi</i> | 49  | 193 | 241  |
| Tc00.1047053511535.30  | <i>T. cruzi</i> | 78  | 406 | 483  |
| Tc00.1047053511537.16  | <i>T. cruzi</i> | 53  | 1   | 53   |
| Tc00.1047053511537.16  | <i>T. cruzi</i> | 104 | 169 | 272  |
| Tc00.1047053511537.16  | <i>T. cruzi</i> | 104 | 169 | 272  |
| Tc00.1047053511537.24  | <i>T. cruzi</i> | 80  | 49  | 128  |
| Tc00.1047053511537.24  | <i>T. cruzi</i> | 48  | 179 | 226  |
| Tc00.1047053511537.24  | <i>T. cruzi</i> | 66  | 403 | 468  |
| Tc00.1047053511537.24  | <i>T. cruzi</i> | 109 | 729 | 837  |
| Tc00.1047053511537.30  | <i>T. cruzi</i> | 51  | 60  | 110  |
| Tc00.1047053511537.30  | <i>T. cruzi</i> | 65  | 112 | 176  |
| Tc00.1047053511537.30  | <i>T. cruzi</i> | 40  | 948 | 987  |
| Tc00.1047053511537.50  | <i>T. cruzi</i> | 167 | 79  | 245  |
| Tc00.1047053511537.60  | <i>T. cruzi</i> | 160 | 328 | 487  |
| Tc00.1047053511537.60  | <i>T. cruzi</i> | 64  | 510 | 573  |
| Tc00.1047053511537.8   | <i>T. cruzi</i> | 60  | 60  | 119  |
| Tc00.1047053511541.20  | <i>T. cruzi</i> | 65  | 235 | 299  |

|                        |                 |     |      |      |
|------------------------|-----------------|-----|------|------|
| Tc00.1047053511541.20  | <i>T. cruzi</i> | 82  | 495  | 576  |
| Tc00.1047053511541.20  | <i>T. cruzi</i> | 82  | 495  | 576  |
| Tc00.1047053511541.9   | <i>T. cruzi</i> | 40  | 179  | 218  |
| Tc00.1047053511543.30  | <i>T. cruzi</i> | 40  | 1    | 40   |
| Tc00.1047053511543.40  | <i>T. cruzi</i> | 59  | 267  | 325  |
| Tc00.1047053511543.40  | <i>T. cruzi</i> | 45  | 365  | 409  |
| Tc00.1047053511543.40  | <i>T. cruzi</i> | 45  | 365  | 409  |
| Tc00.1047053511543.60  | <i>T. cruzi</i> | 43  | 1    | 43   |
| Tc00.1047053511545.100 | <i>T. cruzi</i> | 87  | 153  | 239  |
| Tc00.1047053511545.110 | <i>T. cruzi</i> | 330 | 43   | 372  |
| Tc00.1047053511545.140 | <i>T. cruzi</i> | 467 | 1    | 467  |
| Tc00.1047053511545.180 | <i>T. cruzi</i> | 163 | 1    | 163  |
| Tc00.1047053511545.180 | <i>T. cruzi</i> | 47  | 220  | 266  |
| Tc00.1047053511545.180 | <i>T. cruzi</i> | 307 | 291  | 597  |
| Tc00.1047053511545.190 | <i>T. cruzi</i> | 40  | 36   | 75   |
| Tc00.1047053511545.199 | <i>T. cruzi</i> | 83  | 1    | 83   |
| Tc00.1047053511545.30  | <i>T. cruzi</i> | 44  | 164  | 207  |
| Tc00.1047053511545.30  | <i>T. cruzi</i> | 48  | 223  | 270  |
| Tc00.1047053511545.30  | <i>T. cruzi</i> | 48  | 223  | 270  |
| Tc00.1047053511545.50  | <i>T. cruzi</i> | 45  | 283  | 327  |
| Tc00.1047053511545.70  | <i>T. cruzi</i> | 148 | 1    | 148  |
| Tc00.1047053511545.70  | <i>T. cruzi</i> | 77  | 224  | 300  |
| Tc00.1047053511545.70  | <i>T. cruzi</i> | 55  | 476  | 530  |
| Tc00.1047053511545.70  | <i>T. cruzi</i> | 88  | 572  | 659  |
| Tc00.1047053511545.80  | <i>T. cruzi</i> | 51  | 1    | 51   |
| Tc00.1047053511553.10  | <i>T. cruzi</i> | 226 | 36   | 261  |
| Tc00.1047053511553.100 | <i>T. cruzi</i> | 341 | 28   | 368  |
| Tc00.1047053511553.120 | <i>T. cruzi</i> | 58  | 206  | 263  |
| Tc00.1047053511553.120 | <i>T. cruzi</i> | 148 | 500  | 647  |
| Tc00.1047053511553.130 | <i>T. cruzi</i> | 150 | 26   | 175  |
| Tc00.1047053511553.140 | <i>T. cruzi</i> | 478 | 27   | 504  |
| Tc00.1047053511553.150 | <i>T. cruzi</i> | 329 | 28   | 356  |
| Tc00.1047053511553.160 | <i>T. cruzi</i> | 167 | 118  | 284  |
| Tc00.1047053511553.180 | <i>T. cruzi</i> | 109 | 59   | 167  |
| Tc00.1047053511553.200 | <i>T. cruzi</i> | 440 | 31   | 470  |
| Tc00.1047053511553.30  | <i>T. cruzi</i> | 315 | 97   | 411  |
| Tc00.1047053511553.60  | <i>T. cruzi</i> | 81  | 86   | 166  |
| Tc00.1047053511553.80  | <i>T. cruzi</i> | 42  | 1    | 42   |
| Tc00.1047053511553.90  | <i>T. cruzi</i> | 165 | 21   | 185  |
| Tc00.1047053511555.110 | <i>T. cruzi</i> | 71  | 1    | 71   |
| Tc00.1047053511555.110 | <i>T. cruzi</i> | 56  | 436  | 491  |
| Tc00.1047053511555.110 | <i>T. cruzi</i> | 58  | 571  | 628  |
| Tc00.1047053511555.110 | <i>T. cruzi</i> | 45  | 791  | 835  |
| Tc00.1047053511555.110 | <i>T. cruzi</i> | 54  | 865  | 918  |
| Tc00.1047053511555.110 | <i>T. cruzi</i> | 40  | 956  | 995  |
| Tc00.1047053511555.110 | <i>T. cruzi</i> | 50  | 1047 | 1096 |
| Tc00.1047053511555.110 | <i>T. cruzi</i> | 49  | 1547 | 1595 |

|                        |                 |      |      |      |
|------------------------|-----------------|------|------|------|
| Tc00.1047053511555.110 | <i>T. cruzi</i> | 70   | 1748 | 1817 |
| Tc00.1047053511555.110 | <i>T. cruzi</i> | 55   | 1867 | 1921 |
| Tc00.1047053511555.110 | <i>T. cruzi</i> | 56   | 1956 | 2011 |
| Tc00.1047053511555.110 | <i>T. cruzi</i> | 51   | 2147 | 2197 |
| Tc00.1047053511555.110 | <i>T. cruzi</i> | 74   | 2305 | 2378 |
| Tc00.1047053511555.110 | <i>T. cruzi</i> | 57   | 2625 | 2681 |
| Tc00.1047053511555.110 | <i>T. cruzi</i> | 47   | 3293 | 3339 |
| Tc00.1047053511555.110 | <i>T. cruzi</i> | 59   | 3395 | 3453 |
| Tc00.1047053511555.110 | <i>T. cruzi</i> | 44   | 3540 | 3583 |
| Tc00.1047053511555.20  | <i>T. cruzi</i> | 150  | 107  | 256  |
| Tc00.1047053511555.20  | <i>T. cruzi</i> | 346  | 282  | 627  |
| Tc00.1047053511555.30  | <i>T. cruzi</i> | 112  | 1    | 112  |
| Tc00.1047053511555.30  | <i>T. cruzi</i> | 48   | 244  | 291  |
| Tc00.1047053511555.50  | <i>T. cruzi</i> | 83   | 228  | 310  |
| Tc00.1047053511555.60  | <i>T. cruzi</i> | 61   | 935  | 995  |
| Tc00.1047053511555.60  | <i>T. cruzi</i> | 73   | 1178 | 1250 |
| Tc00.1047053511555.60  | <i>T. cruzi</i> | 58   | 1373 | 1430 |
| Tc00.1047053511555.90  | <i>T. cruzi</i> | 102  | 565  | 666  |
| Tc00.1047053511557.29  | <i>T. cruzi</i> | 77   | 231  | 307  |
| Tc00.1047053511557.40  | <i>T. cruzi</i> | 77   | 1    | 77   |
| Tc00.1047053511557.40  | <i>T. cruzi</i> | 144  | 106  | 249  |
| Tc00.1047053511557.50  | <i>T. cruzi</i> | 47   | 98   | 144  |
| Tc00.1047053511557.50  | <i>T. cruzi</i> | 88   | 273  | 360  |
| Tc00.1047053511557.50  | <i>T. cruzi</i> | 124  | 423  | 546  |
| Tc00.1047053511557.50  | <i>T. cruzi</i> | 1615 | 565  | 2179 |
| Tc00.1047053511557.70  | <i>T. cruzi</i> | 45   | 404  | 448  |
| Tc00.1047053511559.40  | <i>T. cruzi</i> | 126  | 1    | 126  |
| Tc00.1047053511559.40  | <i>T. cruzi</i> | 68   | 280  | 347  |
| Tc00.1047053511559.50  | <i>T. cruzi</i> | 69   | 1    | 69   |
| Tc00.1047053511559.50  | <i>T. cruzi</i> | 386  | 88   | 473  |
| Tc00.1047053511569.14  | <i>T. cruzi</i> | 42   | 225  | 266  |
| Tc00.1047053511571.20  | <i>T. cruzi</i> | 115  | 53   | 167  |
| Tc00.1047053511571.20  | <i>T. cruzi</i> | 76   | 178  | 253  |
| Tc00.1047053511571.20  | <i>T. cruzi</i> | 76   | 178  | 253  |
| Tc00.1047053511571.40  | <i>T. cruzi</i> | 353  | 1    | 353  |
| Tc00.1047053511571.49  | <i>T. cruzi</i> | 65   | 68   | 132  |
| Tc00.1047053511573.20  | <i>T. cruzi</i> | 85   | 1    | 85   |
| Tc00.1047053511573.20  | <i>T. cruzi</i> | 50   | 309  | 358  |
| Tc00.1047053511573.20  | <i>T. cruzi</i> | 44   | 393  | 436  |
| Tc00.1047053511573.20  | <i>T. cruzi</i> | 92   | 446  | 537  |
| Tc00.1047053511575.10  | <i>T. cruzi</i> | 71   | 228  | 298  |
| Tc00.1047053511575.100 | <i>T. cruzi</i> | 161  | 1    | 161  |
| Tc00.1047053511575.110 | <i>T. cruzi</i> | 71   | 79   | 149  |
| Tc00.1047053511575.110 | <i>T. cruzi</i> | 182  | 299  | 480  |
| Tc00.1047053511575.110 | <i>T. cruzi</i> | 43   | 530  | 572  |
| Tc00.1047053511575.110 | <i>T. cruzi</i> | 85   | 590  | 674  |
| Tc00.1047053511575.110 | <i>T. cruzi</i> | 49   | 865  | 913  |



|                        |                 |     |      |      |
|------------------------|-----------------|-----|------|------|
| Tc00.1047053511575.110 | <i>T. cruzi</i> | 127 | 931  | 1057 |
| Tc00.1047053511575.130 | <i>T. cruzi</i> | 63  | 246  | 308  |
| Tc00.1047053511575.30  | <i>T. cruzi</i> | 104 | 372  | 475  |
| Tc00.1047053511575.40  | <i>T. cruzi</i> | 96  | 1    | 96   |
| Tc00.1047053511575.40  | <i>T. cruzi</i> | 54  | 264  | 317  |
| Tc00.1047053511575.40  | <i>T. cruzi</i> | 44  | 607  | 650  |
| Tc00.1047053511575.40  | <i>T. cruzi</i> | 61  | 692  | 752  |
| Tc00.1047053511575.40  | <i>T. cruzi</i> | 44  | 797  | 840  |
| Tc00.1047053511575.50  | <i>T. cruzi</i> | 97  | 68   | 164  |
| Tc00.1047053511575.50  | <i>T. cruzi</i> | 108 | 230  | 337  |
| Tc00.1047053511575.50  | <i>T. cruzi</i> | 58  | 467  | 524  |
| Tc00.1047053511575.50  | <i>T. cruzi</i> | 49  | 540  | 588  |
| Tc00.1047053511575.50  | <i>T. cruzi</i> | 45  | 629  | 673  |
| Tc00.1047053511575.50  | <i>T. cruzi</i> | 75  | 686  | 760  |
| Tc00.1047053511575.50  | <i>T. cruzi</i> | 236 | 768  | 1003 |
| Tc00.1047053511575.50  | <i>T. cruzi</i> | 73  | 1005 | 1077 |
| Tc00.1047053511575.50  | <i>T. cruzi</i> | 81  | 1130 | 1210 |
| Tc00.1047053511575.50  | <i>T. cruzi</i> | 48  | 1305 | 1352 |
| Tc00.1047053511575.50  | <i>T. cruzi</i> | 82  | 1366 | 1447 |
| Tc00.1047053511575.50  | <i>T. cruzi</i> | 129 | 1529 | 1657 |
| Tc00.1047053511575.90  | <i>T. cruzi</i> | 137 | 1    | 137  |
| Tc00.1047053511577.10  | <i>T. cruzi</i> | 81  | 107  | 187  |
| Tc00.1047053511577.100 | <i>T. cruzi</i> | 40  | 1    | 40   |
| Tc00.1047053511577.150 | <i>T. cruzi</i> | 66  | 105  | 170  |
| Tc00.1047053511577.160 | <i>T. cruzi</i> | 224 | 403  | 626  |
| Tc00.1047053511577.180 | <i>T. cruzi</i> | 76  | 1    | 76   |
| Tc00.1047053511577.19  | <i>T. cruzi</i> | 78  | 63   | 140  |
| Tc00.1047053511577.30  | <i>T. cruzi</i> | 75  | 48   | 122  |
| Tc00.1047053511577.30  | <i>T. cruzi</i> | 106 | 208  | 313  |
| Tc00.1047053511577.30  | <i>T. cruzi</i> | 84  | 380  | 463  |
| Tc00.1047053511577.30  | <i>T. cruzi</i> | 58  | 624  | 681  |
| Tc00.1047053511577.4   | <i>T. cruzi</i> | 40  | 1    | 40   |
| Tc00.1047053511577.50  | <i>T. cruzi</i> | 53  | 141  | 193  |
| Tc00.1047053511577.50  | <i>T. cruzi</i> | 54  | 312  | 365  |
| Tc00.1047053511577.50  | <i>T. cruzi</i> | 54  | 312  | 365  |
| Tc00.1047053511577.60  | <i>T. cruzi</i> | 43  | 83   | 125  |
| Tc00.1047053511577.60  | <i>T. cruzi</i> | 101 | 673  | 773  |
| Tc00.1047053511577.60  | <i>T. cruzi</i> | 101 | 673  | 773  |
| Tc00.1047053511577.70  | <i>T. cruzi</i> | 132 | 134  | 265  |
| Tc00.1047053511577.80  | <i>T. cruzi</i> | 57  | 1    | 57   |
| Tc00.1047053511577.80  | <i>T. cruzi</i> | 163 | 72   | 234  |
| Tc00.1047053511577.86  | <i>T. cruzi</i> | 64  | 301  | 364  |
| Tc00.1047053511583.10  | <i>T. cruzi</i> | 67  | 1    | 67   |
| Tc00.1047053511583.10  | <i>T. cruzi</i> | 66  | 85   | 150  |
| Tc00.1047053511583.10  | <i>T. cruzi</i> | 220 | 182  | 401  |
| Tc00.1047053511583.20  | <i>T. cruzi</i> | 80  | 50   | 129  |
| Tc00.1047053511583.20  | <i>T. cruzi</i> | 217 | 160  | 376  |

|                        |                 |     |      |      |
|------------------------|-----------------|-----|------|------|
| Tc00.1047053511583.30  | <i>T. cruzi</i> | 60  | 1    | 60   |
| Tc00.1047053511583.30  | <i>T. cruzi</i> | 70  | 81   | 150  |
| Tc00.1047053511583.30  | <i>T. cruzi</i> | 83  | 225  | 307  |
| Tc00.1047053511583.30  | <i>T. cruzi</i> | 54  | 313  | 366  |
| Tc00.1047053511583.30  | <i>T. cruzi</i> | 69  | 452  | 520  |
| Tc00.1047053511585.100 | <i>T. cruzi</i> | 92  | 44   | 135  |
| Tc00.1047053511585.110 | <i>T. cruzi</i> | 91  | 1    | 91   |
| Tc00.1047053511585.110 | <i>T. cruzi</i> | 95  | 795  | 889  |
| Tc00.1047053511585.120 | <i>T. cruzi</i> | 41  | 327  | 367  |
| Tc00.1047053511585.120 | <i>T. cruzi</i> | 154 | 371  | 524  |
| Tc00.1047053511585.120 | <i>T. cruzi</i> | 127 | 634  | 760  |
| Tc00.1047053511585.125 | <i>T. cruzi</i> | 63  | 71   | 133  |
| Tc00.1047053511585.125 | <i>T. cruzi</i> | 112 | 183  | 294  |
| Tc00.1047053511585.125 | <i>T. cruzi</i> | 47  | 354  | 400  |
| Tc00.1047053511585.140 | <i>T. cruzi</i> | 83  | 35   | 117  |
| Tc00.1047053511585.140 | <i>T. cruzi</i> | 57  | 1133 | 1189 |
| Tc00.1047053511585.150 | <i>T. cruzi</i> | 125 | 1    | 125  |
| Tc00.1047053511585.150 | <i>T. cruzi</i> | 64  | 205  | 268  |
| Tc00.1047053511585.150 | <i>T. cruzi</i> | 70  | 578  | 647  |
| Tc00.1047053511585.150 | <i>T. cruzi</i> | 41  | 882  | 922  |
| Tc00.1047053511585.150 | <i>T. cruzi</i> | 126 | 968  | 1093 |
| Tc00.1047053511585.160 | <i>T. cruzi</i> | 88  | 115  | 202  |
| Tc00.1047053511585.160 | <i>T. cruzi</i> | 45  | 278  | 322  |
| Tc00.1047053511585.160 | <i>T. cruzi</i> | 45  | 278  | 322  |
| Tc00.1047053511585.170 | <i>T. cruzi</i> | 94  | 144  | 237  |
| Tc00.1047053511585.170 | <i>T. cruzi</i> | 45  | 347  | 391  |
| Tc00.1047053511585.170 | <i>T. cruzi</i> | 51  | 483  | 533  |
| Tc00.1047053511585.170 | <i>T. cruzi</i> | 65  | 586  | 650  |
| Tc00.1047053511585.170 | <i>T. cruzi</i> | 41  | 738  | 778  |
| Tc00.1047053511585.180 | <i>T. cruzi</i> | 40  | 179  | 218  |
| Tc00.1047053511585.200 | <i>T. cruzi</i> | 202 | 27   | 228  |
| Tc00.1047053511585.200 | <i>T. cruzi</i> | 74  | 230  | 303  |
| Tc00.1047053511585.200 | <i>T. cruzi</i> | 48  | 346  | 393  |
| Tc00.1047053511585.210 | <i>T. cruzi</i> | 105 | 65   | 169  |
| Tc00.1047053511585.230 | <i>T. cruzi</i> | 44  | 1    | 44   |
| Tc00.1047053511585.30  | <i>T. cruzi</i> | 58  | 108  | 165  |
| Tc00.1047053511585.30  | <i>T. cruzi</i> | 40  | 591  | 630  |
| Tc00.1047053511585.30  | <i>T. cruzi</i> | 63  | 1169 | 1231 |
| Tc00.1047053511585.320 | <i>T. cruzi</i> | 89  | 252  | 340  |
| Tc00.1047053511585.40  | <i>T. cruzi</i> | 125 | 74   | 198  |
| Tc00.1047053511585.40  | <i>T. cruzi</i> | 93  | 351  | 443  |
| Tc00.1047053511585.50  | <i>T. cruzi</i> | 55  | 1    | 55   |
| Tc00.1047053511585.50  | <i>T. cruzi</i> | 192 | 252  | 443  |
| Tc00.1047053511585.60  | <i>T. cruzi</i> | 131 | 45   | 175  |
| Tc00.1047053511585.70  | <i>T. cruzi</i> | 122 | 646  | 767  |
| Tc00.1047053511585.90  | <i>T. cruzi</i> | 63  | 383  | 445  |
| Tc00.1047053511585.90  | <i>T. cruzi</i> | 186 | 528  | 713  |

|                        |                 |     |     |      |
|------------------------|-----------------|-----|-----|------|
| Tc00.1047053511585.90  | <i>T. cruzi</i> | 45  | 739 | 783  |
| Tc00.1047053511587.100 | <i>T. cruzi</i> | 77  | 1   | 77   |
| Tc00.1047053511587.100 | <i>T. cruzi</i> | 44  | 165 | 208  |
| Tc00.1047053511587.100 | <i>T. cruzi</i> | 44  | 165 | 208  |
| Tc00.1047053511587.90  | <i>T. cruzi</i> | 42  | 1   | 42   |
| Tc00.1047053511587.90  | <i>T. cruzi</i> | 40  | 402 | 441  |
| Tc00.1047053511587.90  | <i>T. cruzi</i> | 294 | 716 | 1009 |
| Tc00.1047053511589.10  | <i>T. cruzi</i> | 94  | 1   | 94   |
| Tc00.1047053511589.100 | <i>T. cruzi</i> | 73  | 37  | 109  |
| Tc00.1047053511589.110 | <i>T. cruzi</i> | 175 | 1   | 175  |
| Tc00.1047053511589.110 | <i>T. cruzi</i> | 50  | 214 | 263  |
| Tc00.1047053511589.110 | <i>T. cruzi</i> | 50  | 214 | 263  |
| Tc00.1047053511589.120 | <i>T. cruzi</i> | 73  | 831 | 903  |
| Tc00.1047053511589.150 | <i>T. cruzi</i> | 54  | 23  | 76   |
| Tc00.1047053511589.150 | <i>T. cruzi</i> | 460 | 86  | 545  |
| Tc00.1047053511589.150 | <i>T. cruzi</i> | 460 | 86  | 545  |
| Tc00.1047053511589.180 | <i>T. cruzi</i> | 48  | 203 | 250  |
| Tc00.1047053511589.20  | <i>T. cruzi</i> | 117 | 156 | 272  |
| Tc00.1047053511589.20  | <i>T. cruzi</i> | 48  | 281 | 328  |
| Tc00.1047053511589.20  | <i>T. cruzi</i> | 48  | 281 | 328  |
| Tc00.1047053511589.240 | <i>T. cruzi</i> | 248 | 336 | 583  |
| Tc00.1047053511589.240 | <i>T. cruzi</i> | 88  | 629 | 716  |
| Tc00.1047053511589.250 | <i>T. cruzi</i> | 227 | 1   | 227  |
| Tc00.1047053511589.29  | <i>T. cruzi</i> | 59  | 190 | 248  |
| Tc00.1047053511589.29  | <i>T. cruzi</i> | 76  | 264 | 339  |
| Tc00.1047053511589.29  | <i>T. cruzi</i> | 76  | 264 | 339  |
| Tc00.1047053511589.40  | <i>T. cruzi</i> | 51  | 265 | 315  |
| Tc00.1047053511589.70  | <i>T. cruzi</i> | 285 | 141 | 425  |
| Tc00.1047053511589.74  | <i>T. cruzi</i> | 56  | 386 | 441  |
| Tc00.1047053511589.80  | <i>T. cruzi</i> | 50  | 94  | 143  |
| Tc00.1047053511591.10  | <i>T. cruzi</i> | 500 | 18  | 517  |
| Tc00.1047053511593.20  | <i>T. cruzi</i> | 127 | 25  | 151  |
| Tc00.1047053511593.30  | <i>T. cruzi</i> | 313 | 29  | 341  |
| Tc00.1047053511593.60  | <i>T. cruzi</i> | 315 | 30  | 344  |
| Tc00.1047053511593.70  | <i>T. cruzi</i> | 142 | 25  | 166  |
| Tc00.1047053511593.80  | <i>T. cruzi</i> | 314 | 29  | 342  |
| Tc00.1047053511593.91  | <i>T. cruzi</i> | 43  | 1   | 43   |
| Tc00.1047053511595.30  | <i>T. cruzi</i> | 324 | 29  | 352  |
| Tc00.1047053511595.39  | <i>T. cruzi</i> | 120 | 26  | 145  |
| Tc00.1047053511595.59  | <i>T. cruzi</i> | 93  | 1   | 93   |
| Tc00.1047053511595.59  | <i>T. cruzi</i> | 43  | 140 | 182  |
| Tc00.1047053511595.59  | <i>T. cruzi</i> | 43  | 140 | 182  |
| Tc00.1047053511597.25  | <i>T. cruzi</i> | 81  | 84  | 164  |
| Tc00.1047053511597.40  | <i>T. cruzi</i> | 190 | 46  | 235  |
| Tc00.1047053511597.50  | <i>T. cruzi</i> | 93  | 1   | 93   |
| Tc00.1047053511597.50  | <i>T. cruzi</i> | 47  | 136 | 182  |
| Tc00.1047053511597.50  | <i>T. cruzi</i> | 47  | 136 | 182  |

|                        |                 |     |      |      |
|------------------------|-----------------|-----|------|------|
| Tc00.1047053511599.110 | <i>T. cruzi</i> | 172 | 20   | 191  |
| Tc00.1047053511599.120 | <i>T. cruzi</i> | 236 | 28   | 263  |
| Tc00.1047053511599.30  | <i>T. cruzi</i> | 182 | 107  | 288  |
| Tc00.1047053511599.40  | <i>T. cruzi</i> | 41  | 242  | 282  |
| Tc00.1047053511599.40  | <i>T. cruzi</i> | 59  | 1610 | 1668 |
| Tc00.1047053511599.40  | <i>T. cruzi</i> | 79  | 2853 | 2931 |
| Tc00.1047053511599.40  | <i>T. cruzi</i> | 69  | 3414 | 3482 |
| Tc00.1047053511599.80  | <i>T. cruzi</i> | 41  | 1    | 41   |
| Tc00.1047053511599.80  | <i>T. cruzi</i> | 41  | 121  | 161  |
| Tc00.1047053511599.80  | <i>T. cruzi</i> | 71  | 239  | 309  |
| Tc00.1047053511599.80  | <i>T. cruzi</i> | 108 | 705  | 812  |
| Tc00.1047053511599.90  | <i>T. cruzi</i> | 282 | 109  | 390  |
| Tc00.1047053511603.100 | <i>T. cruzi</i> | 374 | 64   | 437  |
| Tc00.1047053511603.110 | <i>T. cruzi</i> | 192 | 26   | 217  |
| Tc00.1047053511603.130 | <i>T. cruzi</i> | 41  | 233  | 273  |
| Tc00.1047053511603.151 | <i>T. cruzi</i> | 48  | 139  | 186  |
| Tc00.1047053511603.160 | <i>T. cruzi</i> | 296 | 33   | 328  |
| Tc00.1047053511603.170 | <i>T. cruzi</i> | 219 | 29   | 247  |
| Tc00.1047053511603.190 | <i>T. cruzi</i> | 245 | 29   | 273  |
| Tc00.1047053511603.20  | <i>T. cruzi</i> | 172 | 20   | 191  |
| Tc00.1047053511603.200 | <i>T. cruzi</i> | 180 | 18   | 197  |
| Tc00.1047053511603.250 | <i>T. cruzi</i> | 317 | 25   | 341  |
| Tc00.1047053511603.260 | <i>T. cruzi</i> | 156 | 16   | 171  |
| Tc00.1047053511603.30  | <i>T. cruzi</i> | 235 | 28   | 262  |
| Tc00.1047053511603.300 | <i>T. cruzi</i> | 324 | 30   | 353  |
| Tc00.1047053511603.304 | <i>T. cruzi</i> | 168 | 20   | 187  |
| Tc00.1047053511603.310 | <i>T. cruzi</i> | 66  | 1    | 66   |
| Tc00.1047053511603.320 | <i>T. cruzi</i> | 254 | 29   | 282  |
| Tc00.1047053511603.330 | <i>T. cruzi</i> | 174 | 22   | 195  |
| Tc00.1047053511603.380 | <i>T. cruzi</i> | 394 | 25   | 418  |
| Tc00.1047053511603.390 | <i>T. cruzi</i> | 150 | 29   | 178  |
| Tc00.1047053511603.40  | <i>T. cruzi</i> | 55  | 85   | 139  |
| Tc00.1047053511603.434 | <i>T. cruzi</i> | 47  | 165  | 211  |
| Tc00.1047053511603.450 | <i>T. cruzi</i> | 46  | 1    | 46   |
| Tc00.1047053511603.450 | <i>T. cruzi</i> | 50  | 133  | 182  |
| Tc00.1047053511603.450 | <i>T. cruzi</i> | 50  | 133  | 182  |
| Tc00.1047053511603.470 | <i>T. cruzi</i> | 183 | 110  | 292  |
| Tc00.1047053511603.480 | <i>T. cruzi</i> | 125 | 171  | 295  |
| Tc00.1047053511603.500 | <i>T. cruzi</i> | 335 | 20   | 354  |
| Tc00.1047053511603.60  | <i>T. cruzi</i> | 189 | 22   | 210  |
| Tc00.1047053511603.70  | <i>T. cruzi</i> | 264 | 42   | 305  |
| Tc00.1047053511603.80  | <i>T. cruzi</i> | 229 | 33   | 261  |
| Tc00.1047053511603.90  | <i>T. cruzi</i> | 42  | 1    | 42   |
| Tc00.1047053511603.90  | <i>T. cruzi</i> | 112 | 246  | 357  |
| Tc00.1047053511603.90  | <i>T. cruzi</i> | 163 | 731  | 893  |
| Tc00.1047053511605.10  | <i>T. cruzi</i> | 127 | 22   | 148  |
| Tc00.1047053511605.20  | <i>T. cruzi</i> | 330 | 25   | 354  |

|                        |                 |     |      |      |
|------------------------|-----------------|-----|------|------|
| Tc00.1047053511605.30  | <i>T. cruzi</i> | 162 | 34   | 195  |
| Tc00.1047053511605.55  | <i>T. cruzi</i> | 191 | 106  | 296  |
| Tc00.1047053511605.80  | <i>T. cruzi</i> | 390 | 27   | 416  |
| Tc00.1047053511605.90  | <i>T. cruzi</i> | 174 | 25   | 198  |
| Tc00.1047053511607.100 | <i>T. cruzi</i> | 171 | 1    | 171  |
| Tc00.1047053511607.110 | <i>T. cruzi</i> | 334 | 55   | 388  |
| Tc00.1047053511607.30  | <i>T. cruzi</i> | 123 | 24   | 146  |
| Tc00.1047053511607.40  | <i>T. cruzi</i> | 341 | 30   | 370  |
| Tc00.1047053511609.30  | <i>T. cruzi</i> | 212 | 92   | 303  |
| Tc00.1047053511611.11  | <i>T. cruzi</i> | 55  | 17   | 71   |
| Tc00.1047053511611.11  | <i>T. cruzi</i> | 99  | 141  | 239  |
| Tc00.1047053511611.20  | <i>T. cruzi</i> | 211 | 93   | 303  |
| Tc00.1047053511611.40  | <i>T. cruzi</i> | 125 | 32   | 156  |
| Tc00.1047053511611.40  | <i>T. cruzi</i> | 73  | 180  | 252  |
| Tc00.1047053511611.5   | <i>T. cruzi</i> | 111 | 23   | 133  |
| Tc00.1047053511613.10  | <i>T. cruzi</i> | 236 | 40   | 275  |
| Tc00.1047053511613.110 | <i>T. cruzi</i> | 390 | 26   | 415  |
| Tc00.1047053511613.120 | <i>T. cruzi</i> | 175 | 25   | 199  |
| Tc00.1047053511613.180 | <i>T. cruzi</i> | 321 | 28   | 348  |
| Tc00.1047053511613.189 | <i>T. cruzi</i> | 123 | 24   | 146  |
| Tc00.1047053511613.40  | <i>T. cruzi</i> | 347 | 75   | 421  |
| Tc00.1047053511613.50  | <i>T. cruzi</i> | 196 | 14   | 209  |
| Tc00.1047053511613.60  | <i>T. cruzi</i> | 333 | 55   | 387  |
| Tc00.1047053511613.70  | <i>T. cruzi</i> | 98  | 59   | 156  |
| Tc00.1047053511613.80  | <i>T. cruzi</i> | 301 | 50   | 350  |
| Tc00.1047053511613.90  | <i>T. cruzi</i> | 353 | 28   | 380  |
| Tc00.1047053511621.100 | <i>T. cruzi</i> | 109 | 185  | 293  |
| Tc00.1047053511621.110 | <i>T. cruzi</i> | 47  | 25   | 71   |
| Tc00.1047053511621.110 | <i>T. cruzi</i> | 128 | 119  | 246  |
| Tc00.1047053511621.110 | <i>T. cruzi</i> | 64  | 267  | 330  |
| Tc00.1047053511621.110 | <i>T. cruzi</i> | 159 | 362  | 520  |
| Tc00.1047053511621.110 | <i>T. cruzi</i> | 47  | 558  | 604  |
| Tc00.1047053511621.110 | <i>T. cruzi</i> | 46  | 822  | 867  |
| Tc00.1047053511621.110 | <i>T. cruzi</i> | 56  | 886  | 941  |
| Tc00.1047053511621.130 | <i>T. cruzi</i> | 90  | 91   | 180  |
| Tc00.1047053511621.130 | <i>T. cruzi</i> | 126 | 229  | 354  |
| Tc00.1047053511621.130 | <i>T. cruzi</i> | 124 | 734  | 857  |
| Tc00.1047053511621.150 | <i>T. cruzi</i> | 57  | 323  | 379  |
| Tc00.1047053511621.150 | <i>T. cruzi</i> | 339 | 804  | 1142 |
| Tc00.1047053511621.150 | <i>T. cruzi</i> | 45  | 1192 | 1236 |
| Tc00.1047053511621.150 | <i>T. cruzi</i> | 111 | 1238 | 1348 |
| Tc00.1047053511621.180 | <i>T. cruzi</i> | 128 | 1    | 128  |
| Tc00.1047053511621.190 | <i>T. cruzi</i> | 66  | 1    | 66   |
| Tc00.1047053511621.20  | <i>T. cruzi</i> | 44  | 284  | 327  |
| Tc00.1047053511621.200 | <i>T. cruzi</i> | 67  | 197  | 263  |
| Tc00.1047053511621.250 | <i>T. cruzi</i> | 92  | 283  | 374  |
| Tc00.1047053511621.30  | <i>T. cruzi</i> | 75  | 62   | 136  |

|                        |                 |     |      |      |
|------------------------|-----------------|-----|------|------|
| Tc00.1047053511621.50  | <i>T. cruzi</i> | 95  | 39   | 133  |
| Tc00.1047053511621.50  | <i>T. cruzi</i> | 157 | 257  | 413  |
| Tc00.1047053511621.70  | <i>T. cruzi</i> | 67  | 197  | 263  |
| Tc00.1047053511623.20  | <i>T. cruzi</i> | 320 | 1    | 320  |
| Tc00.1047053511623.20  | <i>T. cruzi</i> | 61  | 344  | 404  |
| Tc00.1047053511625.10  | <i>T. cruzi</i> | 180 | 1    | 180  |
| Tc00.1047053511625.100 | <i>T. cruzi</i> | 163 | 25   | 187  |
| Tc00.1047053511625.130 | <i>T. cruzi</i> | 51  | 1    | 51   |
| Tc00.1047053511625.130 | <i>T. cruzi</i> | 162 | 714  | 875  |
| Tc00.1047053511625.160 | <i>T. cruzi</i> | 125 | 38   | 162  |
| Tc00.1047053511625.20  | <i>T. cruzi</i> | 69  | 1    | 69   |
| Tc00.1047053511625.30  | <i>T. cruzi</i> | 48  | 66   | 113  |
| Tc00.1047053511625.90  | <i>T. cruzi</i> | 244 | 73   | 316  |
| Tc00.1047053511627.100 | <i>T. cruzi</i> | 83  | 1    | 83   |
| Tc00.1047053511627.100 | <i>T. cruzi</i> | 169 | 198  | 366  |
| Tc00.1047053511627.110 | <i>T. cruzi</i> | 56  | 31   | 86   |
| Tc00.1047053511627.110 | <i>T. cruzi</i> | 51  | 162  | 212  |
| Tc00.1047053511627.110 | <i>T. cruzi</i> | 56  | 344  | 399  |
| Tc00.1047053511627.130 | <i>T. cruzi</i> | 65  | 98   | 162  |
| Tc00.1047053511627.140 | <i>T. cruzi</i> | 44  | 88   | 131  |
| Tc00.1047053511627.140 | <i>T. cruzi</i> | 398 | 210  | 607  |
| Tc00.1047053511627.60  | <i>T. cruzi</i> | 55  | 121  | 175  |
| Tc00.1047053511675.3   | <i>T. cruzi</i> | 48  | 57   | 104  |
| Tc00.1047053511675.3   | <i>T. cruzi</i> | 201 | 116  | 316  |
| Tc00.1047053511677.10  | <i>T. cruzi</i> | 50  | 1595 | 1644 |
| Tc00.1047053511677.10  | <i>T. cruzi</i> | 54  | 2832 | 2885 |
| Tc00.1047053511677.10  | <i>T. cruzi</i> | 83  | 3376 | 3458 |
| Tc00.1047053511677.20  | <i>T. cruzi</i> | 51  | 1    | 51   |
| Tc00.1047053511679.10  | <i>T. cruzi</i> | 82  | 26   | 107  |
| Tc00.1047053511681.10  | <i>T. cruzi</i> | 59  | 166  | 224  |
| Tc00.1047053511681.20  | <i>T. cruzi</i> | 40  | 1    | 40   |
| Tc00.1047053511683.30  | <i>T. cruzi</i> | 51  | 173  | 223  |
| Tc00.1047053511683.30  | <i>T. cruzi</i> | 52  | 305  | 356  |
| Tc00.1047053511685.10  | <i>T. cruzi</i> | 83  | 26   | 108  |
| Tc00.1047053511685.20  | <i>T. cruzi</i> | 59  | 25   | 83   |
| Tc00.1047053511685.30  | <i>T. cruzi</i> | 82  | 26   | 107  |
| Tc00.1047053511685.40  | <i>T. cruzi</i> | 41  | 443  | 483  |
| Tc00.1047053511685.40  | <i>T. cruzi</i> | 47  | 499  | 545  |
| Tc00.1047053511685.40  | <i>T. cruzi</i> | 47  | 499  | 545  |
| Tc00.1047053511685.50  | <i>T. cruzi</i> | 45  | 63   | 107  |
| Tc00.1047053511685.60  | <i>T. cruzi</i> | 41  | 1    | 41   |
| Tc00.1047053511685.60  | <i>T. cruzi</i> | 105 | 85   | 189  |
| Tc00.1047053511685.60  | <i>T. cruzi</i> | 100 | 240  | 339  |
| Tc00.1047053511685.60  | <i>T. cruzi</i> | 73  | 341  | 413  |
| Tc00.1047053511685.60  | <i>T. cruzi</i> | 513 | 421  | 933  |
| Tc00.1047053511685.60  | <i>T. cruzi</i> | 146 | 955  | 1100 |
| Tc00.1047053511685.60  | <i>T. cruzi</i> | 194 | 1163 | 1356 |

|                        |                 |     |      |      |
|------------------------|-----------------|-----|------|------|
| Tc00.1047053511685.60  | <i>T. cruzi</i> | 149 | 1364 | 1512 |
| Tc00.1047053511687.10  | <i>T. cruzi</i> | 47  | 1    | 47   |
| Tc00.1047053511687.19  | <i>T. cruzi</i> | 47  | 1    | 47   |
| Tc00.1047053511689.19  | <i>T. cruzi</i> | 64  | 238  | 301  |
| Tc00.1047053511691.20  | <i>T. cruzi</i> | 46  | 382  | 427  |
| Tc00.1047053511691.39  | <i>T. cruzi</i> | 48  | 188  | 235  |
| Tc00.1047053511693.10  | <i>T. cruzi</i> | 43  | 70   | 112  |
| Tc00.1047053511693.10  | <i>T. cruzi</i> | 214 | 116  | 329  |
| Tc00.1047053511693.10  | <i>T. cruzi</i> | 137 | 344  | 480  |
| Tc00.1047053511693.10  | <i>T. cruzi</i> | 49  | 610  | 658  |
| Tc00.1047053511693.10  | <i>T. cruzi</i> | 55  | 778  | 832  |
| Tc00.1047053511693.100 | <i>T. cruzi</i> | 50  | 224  | 273  |
| Tc00.1047053511693.110 | <i>T. cruzi</i> | 69  | 1    | 69   |
| Tc00.1047053511693.120 | <i>T. cruzi</i> | 51  | 30   | 80   |
| Tc00.1047053511693.120 | <i>T. cruzi</i> | 50  | 338  | 387  |
| Tc00.1047053511693.120 | <i>T. cruzi</i> | 50  | 338  | 387  |
| Tc00.1047053511693.130 | <i>T. cruzi</i> | 60  | 1    | 60   |
| Tc00.1047053511693.20  | <i>T. cruzi</i> | 238 | 1    | 238  |
| Tc00.1047053511693.30  | <i>T. cruzi</i> | 52  | 44   | 95   |
| Tc00.1047053511693.30  | <i>T. cruzi</i> | 133 | 297  | 429  |
| Tc00.1047053511693.30  | <i>T. cruzi</i> | 319 | 677  | 995  |
| Tc00.1047053511693.40  | <i>T. cruzi</i> | 62  | 17   | 78   |
| Tc00.1047053511693.40  | <i>T. cruzi</i> | 51  | 258  | 308  |
| Tc00.1047053511693.40  | <i>T. cruzi</i> | 100 | 477  | 576  |
| Tc00.1047053511695.10  | <i>T. cruzi</i> | 76  | 46   | 121  |
| Tc00.1047053511697.30  | <i>T. cruzi</i> | 44  | 61   | 104  |
| Tc00.1047053511703.19  | <i>T. cruzi</i> | 71  | 234  | 304  |
| Tc00.1047053511705.10  | <i>T. cruzi</i> | 66  | 1216 | 1281 |
| Tc00.1047053511707.30  | <i>T. cruzi</i> | 109 | 1    | 109  |
| Tc00.1047053511707.30  | <i>T. cruzi</i> | 74  | 285  | 358  |
| Tc00.1047053511707.30  | <i>T. cruzi</i> | 59  | 376  | 434  |
| Tc00.1047053511707.30  | <i>T. cruzi</i> | 41  | 883  | 923  |
| Tc00.1047053511709.19  | <i>T. cruzi</i> | 63  | 197  | 259  |
| Tc00.1047053511711.110 | <i>T. cruzi</i> | 72  | 321  | 392  |
| Tc00.1047053511711.40  | <i>T. cruzi</i> | 41  | 72   | 112  |
| Tc00.1047053511711.60  | <i>T. cruzi</i> | 170 | 42   | 211  |
| Tc00.1047053511711.70  | <i>T. cruzi</i> | 124 | 42   | 165  |
| Tc00.1047053511711.70  | <i>T. cruzi</i> | 64  | 300  | 363  |
| Tc00.1047053511711.70  | <i>T. cruzi</i> | 77  | 461  | 537  |
| Tc00.1047053511713.20  | <i>T. cruzi</i> | 196 | 1    | 196  |
| Tc00.1047053511713.20  | <i>T. cruzi</i> | 103 | 240  | 342  |
| Tc00.1047053511713.20  | <i>T. cruzi</i> | 89  | 380  | 468  |
| Tc00.1047053511713.20  | <i>T. cruzi</i> | 73  | 489  | 561  |
| Tc00.1047053511713.20  | <i>T. cruzi</i> | 81  | 600  | 680  |
| Tc00.1047053511713.30  | <i>T. cruzi</i> | 116 | 1    | 116  |
| Tc00.1047053511713.40  | <i>T. cruzi</i> | 61  | 262  | 322  |
| Tc00.1047053511715.100 | <i>T. cruzi</i> | 68  | 507  | 574  |

|                        |                 |     |     |      |
|------------------------|-----------------|-----|-----|------|
| Tc00.1047053511715.100 | <i>T. cruzi</i> | 54  | 665 | 718  |
| Tc00.1047053511715.20  | <i>T. cruzi</i> | 83  | 12  | 94   |
| Tc00.1047053511715.20  | <i>T. cruzi</i> | 49  | 342 | 390  |
| Tc00.1047053511715.30  | <i>T. cruzi</i> | 118 | 1   | 118  |
| Tc00.1047053511715.40  | <i>T. cruzi</i> | 138 | 1   | 138  |
| Tc00.1047053511715.70  | <i>T. cruzi</i> | 44  | 154 | 197  |
| Tc00.1047053511715.80  | <i>T. cruzi</i> | 51  | 428 | 478  |
| Tc00.1047053511715.90  | <i>T. cruzi</i> | 66  | 51  | 116  |
| Tc00.1047053511715.90  | <i>T. cruzi</i> | 111 | 166 | 276  |
| Tc00.1047053511715.90  | <i>T. cruzi</i> | 90  | 344 | 433  |
| Tc00.1047053511729.20  | <i>T. cruzi</i> | 240 | 1   | 240  |
| Tc00.1047053511729.50  | <i>T. cruzi</i> | 44  | 124 | 167  |
| Tc00.1047053511729.50  | <i>T. cruzi</i> | 165 | 239 | 403  |
| Tc00.1047053511731.10  | <i>T. cruzi</i> | 85  | 64  | 148  |
| Tc00.1047053511731.10  | <i>T. cruzi</i> | 41  | 195 | 235  |
| Tc00.1047053511731.20  | <i>T. cruzi</i> | 43  | 393 | 435  |
| Tc00.1047053511731.20  | <i>T. cruzi</i> | 66  | 518 | 583  |
| Tc00.1047053511731.20  | <i>T. cruzi</i> | 129 | 787 | 915  |
| Tc00.1047053511731.24  | <i>T. cruzi</i> | 43  | 1   | 43   |
| Tc00.1047053511731.24  | <i>T. cruzi</i> | 71  | 211 | 281  |
| Tc00.1047053511731.40  | <i>T. cruzi</i> | 128 | 286 | 413  |
| Tc00.1047053511731.50  | <i>T. cruzi</i> | 114 | 1   | 114  |
| Tc00.1047053511731.50  | <i>T. cruzi</i> | 84  | 447 | 530  |
| Tc00.1047053511731.50  | <i>T. cruzi</i> | 84  | 447 | 530  |
| Tc00.1047053511731.70  | <i>T. cruzi</i> | 81  | 1   | 81   |
| Tc00.1047053511731.89  | <i>T. cruzi</i> | 41  | 251 | 291  |
| Tc00.1047053511733.120 | <i>T. cruzi</i> | 494 | 1   | 494  |
| Tc00.1047053511733.120 | <i>T. cruzi</i> | 228 | 550 | 777  |
| Tc00.1047053511733.50  | <i>T. cruzi</i> | 66  | 13  | 78   |
| Tc00.1047053511733.50  | <i>T. cruzi</i> | 53  | 343 | 395  |
| Tc00.1047053511733.70  | <i>T. cruzi</i> | 55  | 44  | 98   |
| Tc00.1047053511733.80  | <i>T. cruzi</i> | 280 | 837 | 1116 |
| Tc00.1047053511735.30  | <i>T. cruzi</i> | 71  | 18  | 88   |
| Tc00.1047053511735.40  | <i>T. cruzi</i> | 59  | 52  | 110  |
| Tc00.1047053511735.40  | <i>T. cruzi</i> | 62  | 172 | 233  |
| Tc00.1047053511735.88  | <i>T. cruzi</i> | 52  | 59  | 110  |
| Tc00.1047053511737.10  | <i>T. cruzi</i> | 55  | 101 | 155  |
| Tc00.1047053511737.10  | <i>T. cruzi</i> | 144 | 233 | 376  |
| Tc00.1047053511737.20  | <i>T. cruzi</i> | 43  | 262 | 304  |
| Tc00.1047053511737.30  | <i>T. cruzi</i> | 128 | 122 | 249  |
| Tc00.1047053511737.40  | <i>T. cruzi</i> | 479 | 1   | 479  |
| Tc00.1047053511737.40  | <i>T. cruzi</i> | 60  | 574 | 633  |
| Tc00.1047053511737.50  | <i>T. cruzi</i> | 79  | 169 | 247  |
| Tc00.1047053511737.60  | <i>T. cruzi</i> | 138 | 58  | 195  |
| Tc00.1047053511737.60  | <i>T. cruzi</i> | 64  | 206 | 269  |
| Tc00.1047053511737.90  | <i>T. cruzi</i> | 100 | 65  | 164  |
| Tc00.1047053511739.20  | <i>T. cruzi</i> | 63  | 48  | 110  |



|                        |                 |     |      |      |
|------------------------|-----------------|-----|------|------|
| Tc00.1047053511739.30  | <i>T. cruzi</i> | 56  | 94   | 149  |
| Tc00.1047053511741.20  | <i>T. cruzi</i> | 56  | 500  | 555  |
| Tc00.1047053511741.30  | <i>T. cruzi</i> | 40  | 1    | 40   |
| Tc00.1047053511741.40  | <i>T. cruzi</i> | 78  | 1    | 78   |
| Tc00.1047053511741.40  | <i>T. cruzi</i> | 82  | 150  | 231  |
| Tc00.1047053511741.40  | <i>T. cruzi</i> | 82  | 150  | 231  |
| Tc00.1047053511741.50  | <i>T. cruzi</i> | 42  | 209  | 250  |
| Tc00.1047053511743.20  | <i>T. cruzi</i> | 123 | 67   | 189  |
| Tc00.1047053511743.20  | <i>T. cruzi</i> | 123 | 272  | 394  |
| Tc00.1047053511743.30  | <i>T. cruzi</i> | 87  | 1    | 87   |
| Tc00.1047053511745.20  | <i>T. cruzi</i> | 92  | 1    | 92   |
| Tc00.1047053511747.20  | <i>T. cruzi</i> | 66  | 211  | 276  |
| Tc00.1047053511751.110 | <i>T. cruzi</i> | 307 | 27   | 333  |
| Tc00.1047053511751.114 | <i>T. cruzi</i> | 148 | 1    | 148  |
| Tc00.1047053511751.114 | <i>T. cruzi</i> | 64  | 153  | 216  |
| Tc00.1047053511751.14  | <i>T. cruzi</i> | 46  | 47   | 92   |
| Tc00.1047053511751.14  | <i>T. cruzi</i> | 44  | 278  | 321  |
| Tc00.1047053511751.14  | <i>T. cruzi</i> | 44  | 278  | 321  |
| Tc00.1047053511751.140 | <i>T. cruzi</i> | 47  | 194  | 240  |
| Tc00.1047053511751.140 | <i>T. cruzi</i> | 55  | 361  | 415  |
| Tc00.1047053511751.140 | <i>T. cruzi</i> | 55  | 361  | 415  |
| Tc00.1047053511751.144 | <i>T. cruzi</i> | 50  | 628  | 677  |
| Tc00.1047053511751.150 | <i>T. cruzi</i> | 48  | 153  | 200  |
| Tc00.1047053511751.170 | <i>T. cruzi</i> | 44  | 103  | 146  |
| Tc00.1047053511751.170 | <i>T. cruzi</i> | 87  | 209  | 295  |
| Tc00.1047053511751.170 | <i>T. cruzi</i> | 55  | 460  | 514  |
| Tc00.1047053511751.170 | <i>T. cruzi</i> | 69  | 652  | 720  |
| Tc00.1047053511751.170 | <i>T. cruzi</i> | 70  | 787  | 856  |
| Tc00.1047053511751.180 | <i>T. cruzi</i> | 51  | 359  | 409  |
| Tc00.1047053511751.200 | <i>T. cruzi</i> | 141 | 648  | 788  |
| Tc00.1047053511751.210 | <i>T. cruzi</i> | 42  | 228  | 269  |
| Tc00.1047053511751.220 | <i>T. cruzi</i> | 47  | 153  | 199  |
| Tc00.1047053511751.30  | <i>T. cruzi</i> | 43  | 1    | 43   |
| Tc00.1047053511751.30  | <i>T. cruzi</i> | 42  | 161  | 202  |
| Tc00.1047053511751.30  | <i>T. cruzi</i> | 42  | 161  | 202  |
| Tc00.1047053511751.40  | <i>T. cruzi</i> | 103 | 169  | 271  |
| Tc00.1047053511751.60  | <i>T. cruzi</i> | 238 | 1    | 238  |
| Tc00.1047053511751.70  | <i>T. cruzi</i> | 97  | 507  | 603  |
| Tc00.1047053511751.70  | <i>T. cruzi</i> | 89  | 810  | 898  |
| Tc00.1047053511751.70  | <i>T. cruzi</i> | 124 | 1122 | 1245 |
| Tc00.1047053511751.70  | <i>T. cruzi</i> | 71  | 1471 | 1541 |
| Tc00.1047053511751.70  | <i>T. cruzi</i> | 53  | 1573 | 1625 |
| Tc00.1047053511751.80  | <i>T. cruzi</i> | 196 | 359  | 554  |
| Tc00.1047053511753.110 | <i>T. cruzi</i> | 62  | 172  | 233  |
| Tc00.1047053511753.110 | <i>T. cruzi</i> | 41  | 284  | 324  |
| Tc00.1047053511753.110 | <i>T. cruzi</i> | 73  | 356  | 428  |
| Tc00.1047053511753.110 | <i>T. cruzi</i> | 50  | 493  | 542  |

|                        |                 |     |      |      |
|------------------------|-----------------|-----|------|------|
| Tc00.1047053511753.110 | <i>T. cruzi</i> | 45  | 779  | 823  |
| Tc00.1047053511753.110 | <i>T. cruzi</i> | 63  | 937  | 999  |
| Tc00.1047053511753.130 | <i>T. cruzi</i> | 50  | 1    | 50   |
| Tc00.1047053511753.150 | <i>T. cruzi</i> | 145 | 83   | 227  |
| Tc00.1047053511753.30  | <i>T. cruzi</i> | 138 | 418  | 555  |
| Tc00.1047053511753.30  | <i>T. cruzi</i> | 159 | 655  | 813  |
| Tc00.1047053511753.40  | <i>T. cruzi</i> | 53  | 257  | 309  |
| Tc00.1047053511753.50  | <i>T. cruzi</i> | 89  | 1    | 89   |
| Tc00.1047053511753.60  | <i>T. cruzi</i> | 96  | 1    | 96   |
| Tc00.1047053511753.60  | <i>T. cruzi</i> | 122 | 171  | 292  |
| Tc00.1047053511753.60  | <i>T. cruzi</i> | 72  | 306  | 377  |
| Tc00.1047053511753.70  | <i>T. cruzi</i> | 175 | 406  | 580  |
| Tc00.1047053511753.80  | <i>T. cruzi</i> | 76  | 1    | 76   |
| Tc00.1047053511753.9   | <i>T. cruzi</i> | 67  | 84   | 150  |
| Tc00.1047053511753.90  | <i>T. cruzi</i> | 60  | 53   | 112  |
| Tc00.1047053511753.90  | <i>T. cruzi</i> | 58  | 193  | 250  |
| Tc00.1047053511753.90  | <i>T. cruzi</i> | 118 | 288  | 405  |
| Tc00.1047053511787.10  | <i>T. cruzi</i> | 178 | 66   | 243  |
| Tc00.1047053511797.110 | <i>T. cruzi</i> | 50  | 1    | 50   |
| Tc00.1047053511797.110 | <i>T. cruzi</i> | 48  | 335  | 382  |
| Tc00.1047053511797.110 | <i>T. cruzi</i> | 42  | 426  | 467  |
| Tc00.1047053511797.110 | <i>T. cruzi</i> | 40  | 478  | 517  |
| Tc00.1047053511797.110 | <i>T. cruzi</i> | 92  | 732  | 823  |
| Tc00.1047053511797.120 | <i>T. cruzi</i> | 386 | 25   | 410  |
| Tc00.1047053511797.167 | <i>T. cruzi</i> | 252 | 66   | 317  |
| Tc00.1047053511797.200 | <i>T. cruzi</i> | 314 | 73   | 386  |
| Tc00.1047053511797.220 | <i>T. cruzi</i> | 44  | 221  | 264  |
| Tc00.1047053511797.220 | <i>T. cruzi</i> | 50  | 1597 | 1646 |
| Tc00.1047053511797.220 | <i>T. cruzi</i> | 46  | 2844 | 2889 |
| Tc00.1047053511797.240 | <i>T. cruzi</i> | 50  | 1    | 50   |
| Tc00.1047053511797.240 | <i>T. cruzi</i> | 40  | 130  | 169  |
| Tc00.1047053511797.240 | <i>T. cruzi</i> | 40  | 427  | 466  |
| Tc00.1047053511797.240 | <i>T. cruzi</i> | 76  | 734  | 809  |
| Tc00.1047053511797.54  | <i>T. cruzi</i> | 49  | 216  | 264  |
| Tc00.1047053511797.54  | <i>T. cruzi</i> | 54  | 1590 | 1643 |
| Tc00.1047053511797.54  | <i>T. cruzi</i> | 54  | 1590 | 1643 |
| Tc00.1047053511801.10  | <i>T. cruzi</i> | 53  | 92   | 144  |
| Tc00.1047053511801.10  | <i>T. cruzi</i> | 161 | 457  | 617  |
| Tc00.1047053511801.10  | <i>T. cruzi</i> | 180 | 636  | 815  |
| Tc00.1047053511801.14  | <i>T. cruzi</i> | 147 | 303  | 449  |
| Tc00.1047053511801.14  | <i>T. cruzi</i> | 47  | 504  | 550  |
| Tc00.1047053511801.14  | <i>T. cruzi</i> | 47  | 504  | 550  |
| Tc00.1047053511801.20  | <i>T. cruzi</i> | 54  | 377  | 430  |
| Tc00.1047053511801.30  | <i>T. cruzi</i> | 251 | 30   | 280  |
| Tc00.1047053511801.30  | <i>T. cruzi</i> | 229 | 321  | 549  |
| Tc00.1047053511801.50  | <i>T. cruzi</i> | 54  | 227  | 280  |
| Tc00.1047053511801.60  | <i>T. cruzi</i> | 42  | 59   | 100  |

|                        |                 |     |      |      |
|------------------------|-----------------|-----|------|------|
| Tc00.1047053511803.40  | <i>T. cruzi</i> | 107 | 118  | 224  |
| Tc00.1047053511803.40  | <i>T. cruzi</i> | 104 | 459  | 562  |
| Tc00.1047053511803.40  | <i>T. cruzi</i> | 104 | 459  | 562  |
| Tc00.1047053511803.50  | <i>T. cruzi</i> | 60  | 25   | 84   |
| Tc00.1047053511803.70  | <i>T. cruzi</i> | 71  | 1    | 71   |
| Tc00.1047053511803.70  | <i>T. cruzi</i> | 50  | 231  | 280  |
| Tc00.1047053511803.70  | <i>T. cruzi</i> | 287 | 308  | 594  |
| Tc00.1047053511805.20  | <i>T. cruzi</i> | 678 | 11   | 688  |
| Tc00.1047053511867.10  | <i>T. cruzi</i> | 95  | 1    | 95   |
| Tc00.1047053511867.10  | <i>T. cruzi</i> | 106 | 163  | 268  |
| Tc00.1047053511867.10  | <i>T. cruzi</i> | 106 | 163  | 268  |
| Tc00.1047053511867.110 | <i>T. cruzi</i> | 75  | 93   | 167  |
| Tc00.1047053511867.130 | <i>T. cruzi</i> | 173 | 30   | 202  |
| Tc00.1047053511867.130 | <i>T. cruzi</i> | 44  | 230  | 273  |
| Tc00.1047053511867.130 | <i>T. cruzi</i> | 77  | 347  | 423  |
| Tc00.1047053511867.130 | <i>T. cruzi</i> | 330 | 437  | 766  |
| Tc00.1047053511867.130 | <i>T. cruzi</i> | 75  | 775  | 849  |
| Tc00.1047053511867.150 | <i>T. cruzi</i> | 48  | 12   | 59   |
| Tc00.1047053511867.150 | <i>T. cruzi</i> | 75  | 226  | 300  |
| Tc00.1047053511867.150 | <i>T. cruzi</i> | 105 | 337  | 441  |
| Tc00.1047053511867.170 | <i>T. cruzi</i> | 94  | 72   | 165  |
| Tc00.1047053511867.170 | <i>T. cruzi</i> | 59  | 202  | 260  |
| Tc00.1047053511867.200 | <i>T. cruzi</i> | 276 | 70   | 345  |
| Tc00.1047053511867.200 | <i>T. cruzi</i> | 595 | 443  | 1037 |
| Tc00.1047053511867.200 | <i>T. cruzi</i> | 71  | 1117 | 1187 |
| Tc00.1047053511867.200 | <i>T. cruzi</i> | 57  | 1250 | 1306 |
| Tc00.1047053511867.30  | <i>T. cruzi</i> | 97  | 104  | 200  |
| Tc00.1047053511867.30  | <i>T. cruzi</i> | 63  | 485  | 547  |
| Tc00.1047053511867.30  | <i>T. cruzi</i> | 63  | 485  | 547  |
| Tc00.1047053511867.40  | <i>T. cruzi</i> | 44  | 137  | 180  |
| Tc00.1047053511867.60  | <i>T. cruzi</i> | 55  | 280  | 334  |
| Tc00.1047053511867.80  | <i>T. cruzi</i> | 52  | 1    | 52   |
| Tc00.1047053511871.100 | <i>T. cruzi</i> | 229 | 1    | 229  |
| Tc00.1047053511871.100 | <i>T. cruzi</i> | 56  | 246  | 301  |
| Tc00.1047053511871.100 | <i>T. cruzi</i> | 98  | 338  | 435  |
| Tc00.1047053511871.100 | <i>T. cruzi</i> | 116 | 531  | 646  |
| Tc00.1047053511871.110 | <i>T. cruzi</i> | 47  | 35   | 81   |
| Tc00.1047053511871.110 | <i>T. cruzi</i> | 209 | 163  | 371  |
| Tc00.1047053511871.120 | <i>T. cruzi</i> | 373 | 1    | 373  |
| Tc00.1047053511871.130 | <i>T. cruzi</i> | 42  | 1    | 42   |
| Tc00.1047053511871.20  | <i>T. cruzi</i> | 93  | 1    | 93   |
| Tc00.1047053511871.20  | <i>T. cruzi</i> | 130 | 111  | 240  |
| Tc00.1047053511871.20  | <i>T. cruzi</i> | 108 | 267  | 374  |
| Tc00.1047053511871.40  | <i>T. cruzi</i> | 54  | 243  | 296  |
| Tc00.1047053511871.70  | <i>T. cruzi</i> | 68  | 1    | 68   |
| Tc00.1047053511871.70  | <i>T. cruzi</i> | 432 | 169  | 600  |
| Tc00.1047053511871.80  | <i>T. cruzi</i> | 42  | 1    | 42   |

|                        |                 |     |     |      |
|------------------------|-----------------|-----|-----|------|
| Tc00.1047053511871.90  | <i>T. cruzi</i> | 142 | 1   | 142  |
| Tc00.1047053511871.90  | <i>T. cruzi</i> | 301 | 223 | 523  |
| Tc00.1047053511871.90  | <i>T. cruzi</i> | 53  | 530 | 582  |
| Tc00.1047053511873.10  | <i>T. cruzi</i> | 46  | 1   | 46   |
| Tc00.1047053511873.10  | <i>T. cruzi</i> | 46  | 121 | 166  |
| Tc00.1047053511873.10  | <i>T. cruzi</i> | 47  | 228 | 274  |
| Tc00.1047053511873.10  | <i>T. cruzi</i> | 53  | 412 | 464  |
| Tc00.1047053511873.10  | <i>T. cruzi</i> | 115 | 715 | 829  |
| Tc00.1047053511873.20  | <i>T. cruzi</i> | 92  | 56  | 147  |
| Tc00.1047053511873.5   | <i>T. cruzi</i> | 77  | 75  | 151  |
| Tc00.1047053511873.5   | <i>T. cruzi</i> | 160 | 175 | 334  |
| Tc00.1047053511875.20  | <i>T. cruzi</i> | 84  | 1   | 84   |
| Tc00.1047053511875.20  | <i>T. cruzi</i> | 131 | 740 | 870  |
| Tc00.1047053511875.80  | <i>T. cruzi</i> | 477 | 64  | 540  |
| Tc00.1047053511875.9   | <i>T. cruzi</i> | 245 | 58  | 302  |
| Tc00.1047053511877.10  | <i>T. cruzi</i> | 118 | 127 | 244  |
| Tc00.1047053511877.20  | <i>T. cruzi</i> | 289 | 30  | 318  |
| Tc00.1047053511911.10  | <i>T. cruzi</i> | 40  | 232 | 271  |
| Tc00.1047053511911.110 | <i>T. cruzi</i> | 62  | 191 | 252  |
| Tc00.1047053511911.120 | <i>T. cruzi</i> | 45  | 459 | 503  |
| Tc00.1047053511911.150 | <i>T. cruzi</i> | 45  | 1   | 45   |
| Tc00.1047053511911.60  | <i>T. cruzi</i> | 44  | 1   | 44   |
| Tc00.1047053511911.60  | <i>T. cruzi</i> | 274 | 728 | 1001 |
| Tc00.1047053511911.98  | <i>T. cruzi</i> | 41  | 130 | 170  |
