# Supplementary material for: Intrinsically disordered proteins (IDPs) in trypanosomatids
Source: PubMed Central journal article supplement (PMC4378006; doi:10.1186/1471-2164-15-1100), 2014-12-13

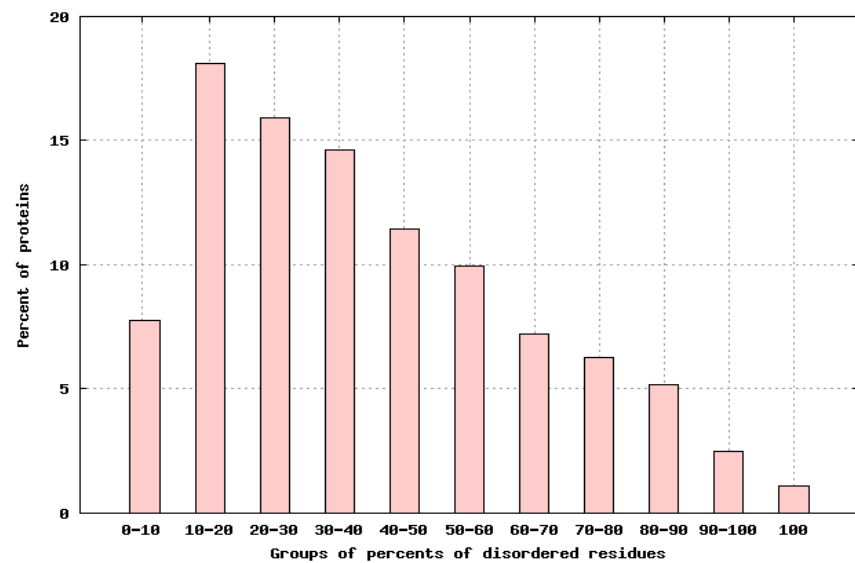

Supplement: 12864_2014_6918_MOESM7_ESM.pdf [file 12864_2014_6918_MOESM7_ESM.pdf]
