# Supplementary material for: Intrinsically disordered proteins (IDPs) in trypanosomatids
Source: PubMed Central journal article supplement (PMC4378006; doi:10.1186/1471-2164-15-1100), 2014-12-13
Supplement: 12864_2014_6918_MOESM10_ESM.pdf [file 12864_2014_6918_MOESM10_ESM.pdf]

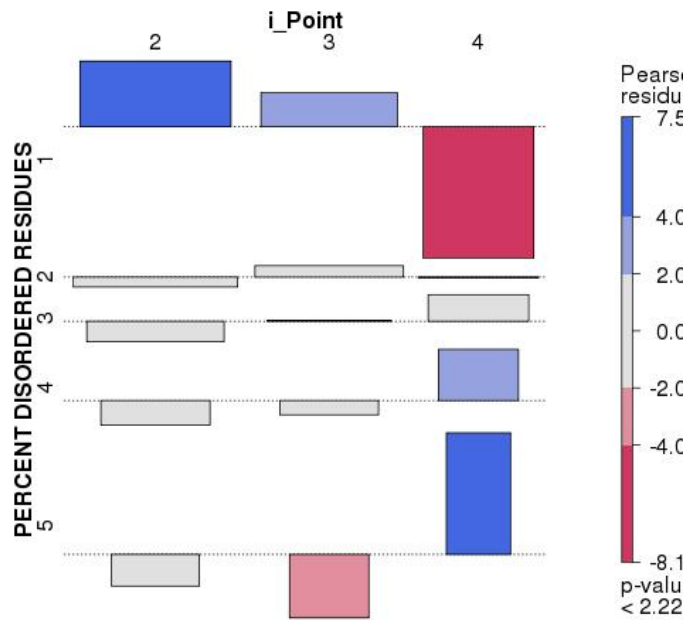

| I_POINT                               |   |
|---------------------------------------|---|
| <= 3                                  | 1 |
| > 3 AND <= 7                          | 2 |
| > 7 AND <= 9                          | 3 |
| > 9                                   | 4 |
| <b>PERCENT OF DISORDERED RESIDUES</b> |   |
| > 0 AND <= 0.2                        | 1 |
| > 0.2 AND <= 0.4                      | 2 |
| > 0.4 AND <= 0.6                      | 3 |
| > 0.6 AND <= 0.8                      | 4 |
| > 0.8                                 | 5 |
