# Supplementary material for: Intrinsically disordered proteins (IDPs) in trypanosomatids
Source: PubMed Central journal article supplement (PMC4378006; doi:10.1186/1471-2164-15-1100), 2014-12-13
Supplement: 12864_2014_6918_MOESM11_ESM.pdf [file 12864_2014_6918_MOESM11_ESM.pdf]

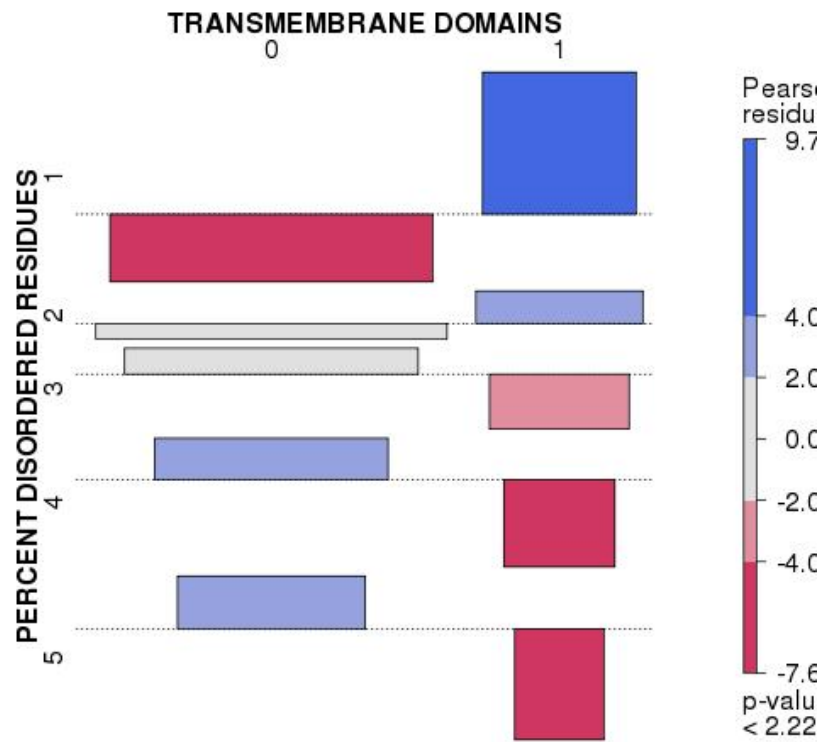

| <b>TRANSMEMBRANE DOMAINS</b>          |   |
|---------------------------------------|---|
| without transmembrane regions         | 0 |
| with transmembrane regions            | 1 |
| <b>PERCENT OF DISORDERED RESIDUES</b> |   |
| > 0 AND ≤ 0.2                         | 1 |
| > 0.2 AND ≤ 0.4                       | 2 |
| > 0.4 AND ≤ 0.6                       | 3 |
| > 0.6 AND ≤ 0.8                       | 4 |
| > 0.8                                 | 5 |
