# Supplementary material for: Intrinsically disordered proteins (IDPs) in trypanosomatids
Source: PubMed Central journal article supplement (PMC4378006; doi:10.1186/1471-2164-15-1100), 2014-12-13
Supplement: 12864_2014_6918_MOESM13_ESM.pdf [file 12864_2014_6918_MOESM13_ESM.pdf]

| IDP spot | Organism               | Protein ID     | Function                                                           | Score | Best Combination             |
|----------|------------------------|----------------|--------------------------------------------------------------------|-------|------------------------------|
|          |                        |                |                                                                    |       | REM465_GLOBPIPE_IUPRED_VSL2B |
| IUP1     | <i>L. major</i>        | LmjF27.0240    | kinetoplast-associated protein-like protein                        | 285   | X                            |
| IUP4     | <i>L. major</i>        | LmjF32.2520    | hypothetical protein, unknown function                             | 31    | X                            |
| IUP5     | <i>L. major</i>        | LmjF09.0910    | calmodulin, putative                                               | 505   | X                            |
| IUP6     | <i>L. major</i>        | LmjF27.0240    | kinetoplast-associated protein-like protein                        | 435   | X                            |
| IUP8     | <i>L. major</i>        | LmjF05.0380    | microtubule-associated protein, putative                           | 188   | X                            |
| IUP10    | <i>L. major</i>        | LmjF05.0380    | microtubule-associated protein, putative                           | 449   | X                            |
| IUP11    | <i>L. major</i>        | LmjF05.0380    | microtubule-associated protein, putative                           | 228   | X                            |
| IUP25    | <i>L. major</i>        | LmjF23.1020    | hypothetical protein, unknown function                             | 1973  | X                            |
| IUP26a   | <i>L. major</i>        | LmjF04.0770    | nascent polypeptide associated complex subunit-like protein        | 1093  | X                            |
| IUP26b   | <i>L. major</i>        | LmjF19.1160    | hypothetical protein, conserved                                    | 1054  | X                            |
| IUP27    | <i>L. major</i>        | LmjF04.0770    | nascent polypeptide associated complex subunit-like protein        | 1854  | X                            |
| IUP32    | <i>L. major</i>        | LmjF28.2770    | heat-shock protein hsp70, putative                                 | 608   | X                            |
| IUP34    | <i>L. major</i>        | LmjF30.2460    | heat shock 70-related protein 1, mitochondrial precursor, putative | 1591  | X                            |
| IUP37    | <i>L. braziliensis</i> | no hits        | -                                                                  | -     |                              |
| IUP40    | <i>L. braziliensis</i> | no hits        | -                                                                  | -     |                              |
| IUP42    | <i>L. braziliensis</i> | LbrM25_V2.0580 | eukaryotic initiation factor 5a, putative                          | 2160  | X                            |
| IUP43    | <i>L. braziliensis</i> | LbrM28_V2.1300 | glucose-regulated protein 78, putative                             | 363   | X                            |
