# Supplementary material for: Intrinsically disordered proteins (IDPs) in trypanosomatids
Source: BMC Genomics. 2014 Dec 13;15(1):1100. doi: 10.1186/1471-2164-15-1100 (PMC4378006; doi:10.1186/1471-2164-15-1100)
Supplement: Supplementary file 6 — Additional file 6: IDPs functional annotation. Classification of the identified IDPs (hypothetical or with predicted function). (PDF 10 KB) [file 12864_2014_6918_MOESM6_ESM.pdf]

| Organism               | Number of analyzed sequences | Number of predicted IDPs | Percent of IDPs with predicted function | Percent of hypothetical IDPs |
|------------------------|------------------------------|--------------------------|-----------------------------------------|------------------------------|
| <i>L. braziliensis</i> | 7965 (95.8%)                 | 5725 (68.9%)             | 28.9%                                   | 70.9%                        |
| <i>L. major</i>        | 8171 (97.2%)                 | 5959 (70.8%)             | 29.1%                                   | 70.6%                        |
| <i>L. infantum</i>     | 7835 (95.3%)                 | 5797 (70.5%)             | 28.7%                                   | 71%                          |
| <i>L. mexicana</i>     | 7952 (100%)                  | 5774 (72.6%)             | 29.5%                                   | 70.4%                        |
| <i>L. tarentolae</i>   | 7465 (100%)                  | 5483 (73.4%)             | 26.9%                                   | 72.5%                        |
| <i>T. cruzi</i>        | 8178 (79.2%)                 | 5565 (53.9%).            | 38.5%                                   | 61.5%                        |
| <i>T. brucei</i>       | 9472 (95.7%)                 | 5510 (55.6%)             | 32%                                     | 68%                          |
